# Supplementary material
Source: PubMed Central journal article supplement (PMC3411198)
Supplement: pr300358k_si_001.pdf [file pr300358k_si_001.pdf]

## **Supplementary materials**

### **Supplementary material 1:**

Protein list of the 3250 unique identified corneal proteins identified in the 3 layers of the human cornea.

Sheet 1: List of proteins with indication of in which layers the proteins were identified in. Highlights in green indicate that the protein was identified in all three layers.

Sheet 2-4: List of all proteins identified in the individual layers including GO terms, GO summary categories and ms/ms information provided by Mascot.

### **Supplementary material 2:**

Complete list of all quantified proteins including relative abundance, standard deviation, average intensity and number of quantifiable peptides.

Sheet 1: List of the top 55 quantified proteins in the three layers based on the in-solution digest. The relative amounts based on the gel separations are also provided.

Sheet 2-4: List of all quantified proteins for the individual layers including intensities from the individual in-solution and gel digests.

### **Supplementary material 3:**

Gene Ontology distributions for summary categories based on: Cellular component, Molecular function and Biological Process. Distributions are provided for the three layers of the human cornea for both the identified proteins and the quantified proteins where the relative amount of each protein is accounted for.

### **Supplementary material 4-6:**

Assigned MS/MS spectra for all single-peptide-based protein identifications. Spectra for the epithelium are provided in material 4, stroma in 5 and endothelium in 6. All spectra are sorted alphabetically by protein name and bookmarks based on protein names are provided for easy navigation through the spectra.

### **Supplementary material 7:**

1D SDS-Page gels for the analysis of the epithelium, stroma and endothelium samples.

### **Supplementary material 8:**

Mascot Distiller processing settings for the TripleTOF 5600 mass spectrometer and the Mascot average quantitation method used for quantitation. Settings are provided in the XML format for easy use.
