# Supplementary material
Source: PubMed Central journal article supplement (PMC3411198)
Supplement: pr300358k_si_005.pdf [file pr300358k_si_005.pdf]

# **Mascot** Search Results

## Peptide View

MS/MS Fragmentation of **GDMVTLPAGIYHR**

Found in **MTND\_HUMAN**, 1,2-dihydroxy-3-keto-5-methylthiopentene dioxygenase OS=Homo sapiens GN=ADI1 PE=1 SV=1

Match to Query 48218: 1444.712562 from(482.578130,3+) rtinseconds(2295) index(26457)

Title: Locus:1.1.1.2131.10

Data file 2011-11-10 - TFD - EP 4-6.mgf

Click mouse within plot area to zoom in by factor of two about that point

Or, Plot from  to  Da

Label all possible matches  Label matches used for scoring

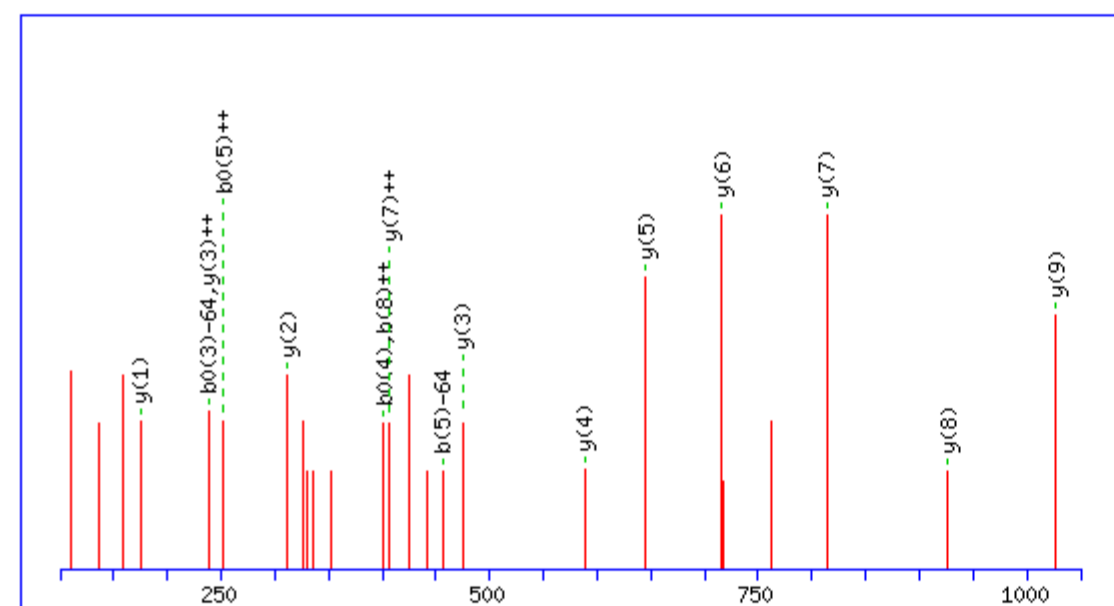

Monoisotopic mass of neutral peptide Mr(calc): 1444.713287

Fixed modifications: Propionamide (C) (apply to specified residues or termini only)

Variable modifications:

M3 : Oxidation (M), with neutral losses 0.000000 (shown in table), 63.998285

Ions Score: 58 Expect: 1.7e-005

Matches : 16/154 fragment ions using 23 most intense peaks ([help](#))

| #  | b           | b <sup>++</sup> | b <sup>0</sup> | b <sup>0++</sup> | Seq. | y           | y <sup>++</sup> | y <sup>*</sup> | y <sup>++</sup> | y <sup>0</sup> | y <sup>0++</sup> | #  |
|----|-------------|-----------------|----------------|------------------|------|-------------|-----------------|----------------|-----------------|----------------|------------------|----|
| 1  | 58.028740   | 29.518008       |                |                  | G    |             |                 |                |                 |                |                  | 13 |
| 2  | 173.055683  | 87.031479       | 155.045118     | 78.026197        | D    | 1388.699099 | 694.853188      | 1371.672550    | 686.339913      | 1370.688534    | 685.847905       | 12 |
| 3  | 320.091083  | 160.549179      | 302.080518     | 151.543897       | M    | 1273.672156 | 637.339716      | 1256.645607    | 628.826442      | 1255.661591    | 628.334434       | 11 |
| 4  | 419.159497  | 210.083386      | 401.148932     | 201.078104       | V    | 1126.636756 | 563.822016      | 1109.610207    | 555.308742      | 1108.626191    | 554.816734       | 10 |
| 5  | 520.207176  | 260.607226      | 502.196611     | 251.601944       | T    | 1027.568342 | 514.287809      | 1010.541793    | 505.774535      | 1009.557777    | 505.282527       | 9  |
| 6  | 633.291240  | 317.149258      | 615.280675     | 308.143976       | L    | 926.520663  | 463.763970      | 909.494114     | 455.250695      |                |                  | 8  |
| 7  | 730.344004  | 365.675640      | 712.333439     | 356.670358       | P    | 813.436599  | 407.221938      | 796.410050     | 398.708663      |                |                  | 7  |
| 8  | 801.381118  | 401.194197      | 783.370553     | 392.188915       | A    | 716.383835  | 358.695556      | 699.357286     | 350.182281      |                |                  | 6  |
| 9  | 858.402582  | 429.704929      | 840.392017     | 420.699647       | G    | 645.346721  | 323.176999      | 628.320172     | 314.663724      |                |                  | 5  |
| 10 | 971.486646  | 486.246961      | 953.476081     | 477.241679       | I    | 588.325257  | 294.666267      | 571.298708     | 286.152992      |                |                  | 4  |
| 11 | 1134.549975 | 567.778626      | 1116.539410    | 558.773343       | Y    | 475.241193  | 238.124234      | 458.214644     | 229.610960      |                |                  | 3  |
| 12 | 1271.608887 | 636.308082      | 1253.598322    | 627.302799       | H    | 312.177864  | 156.592570      | 295.151315     | 148.079295      |                |                  | 2  |
| 13 |             |                 |                |                  | R    | 175.118952  | 88.063114       | 158.092403     | 79.549839       |                |                  | 1  |

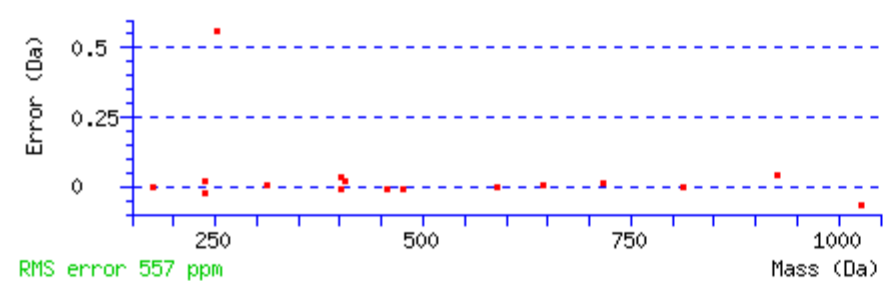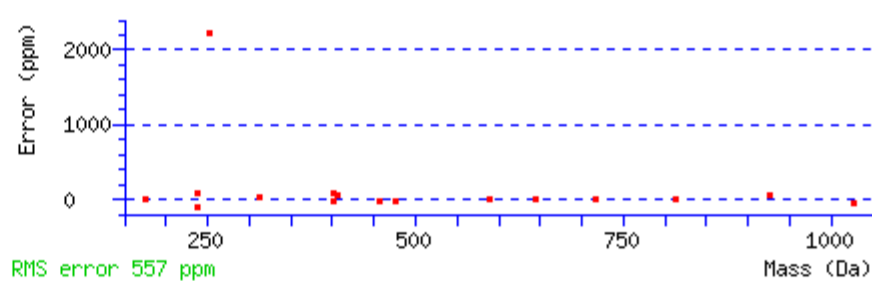

NCBI BLAST search of **GDMVTLPAGIYHR**

(Parameters: blastp, nr protein database, expect=20000, no filter, PAM30)

Other BLAST [web gateways](#)

All matches to this query

| Score | Mr(calc):   | Delta     | Sequence                      |
|-------|-------------|-----------|-------------------------------|
| 58.0  | 1444.713287 | -0.000725 | <a href="#">GDMVTLPAGIYHR</a> |
| 26.5  | 1444.713287 | -0.000725 | <a href="#">GDMVTLPAGIYHR</a> |
| 11.4  | 1444.702072 | 0.010490  | <a href="#">TGTFPETPMVPPR</a> |
| 9.1   | 1444.713272 | -0.000710 | <a href="#">ELIQGIFMGEHR</a>  |
| 6.8   | 1444.702072 | 0.010490  | <a href="#">TGTFPETPMVPPR</a> |
| 6.8   | 1444.702072 | 0.010490  | <a href="#">TGTFPETPMVPPR</a> |
| 4.9   | 1444.721130 | -0.008568 | <a href="#">RLESFLHDSWR</a>   |
| 4.6   | 1444.702072 | 0.010490  | <a href="#">TGTFPETPMVPPR</a> |
| 2.9   | 1444.702072 | 0.010490  | <a href="#">TGTFPETPMVPPR</a> |
| 1.6   | 1444.723801 | -0.011239 | <a href="#">YYDFKNPIIEK</a>   |

Mascot: <http://www.matrixscience.com/>

**Peptide View**

MS/MS Fragmentation of **FPQVQAFVR**

Found in **SEP15\_HUMAN**, 15 kDa selenoprotein OS=Homo sapiens GN=SEP15 PE=1 SV=3

Match to Query 20790: 1090.591548 from(546.303050,2+) rtinseconds(2786) index(30005)  
 Title: Locus:1.1.1.2515.14  
 Data file 2011-11-13 - TFD - EP 7-7.mgf

Click mouse within plot area to zoom in by factor of two about that point

Or, Plot from  to  Da

Label all possible matches  Label matches used for scoring

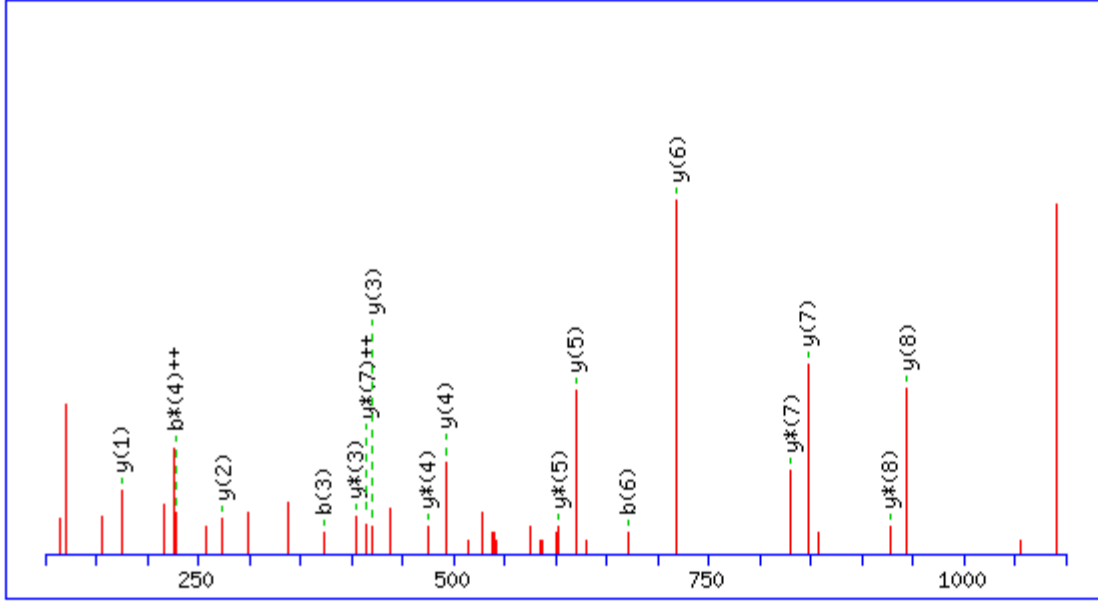

Monoisotopic mass of neutral peptide Mr(calc): 1090.592377  
 Fixed modifications: Propionamide (C) (apply to specified residues or termini only)  
 Ions Score: 60 Expect: 4.5e-006  
 Matches : 17/60 fragment ions using 33 most intense peaks ([help](#))

| # | b          | b <sup>++</sup> | b <sup>*</sup> | b <sup>+++</sup> | Seq. | y          | y <sup>++</sup> | y <sup>*</sup> | y <sup>+++</sup> | # |
|---|------------|-----------------|----------------|------------------|------|------------|-----------------|----------------|------------------|---|
| 1 | 148.075690 | 74.541483       |                |                  | F    |            |                 |                |                  | 9 |
| 2 | 245.128454 | 123.067865      |                |                  | P    | 944.531228 | 472.769252      | 927.504679     | 464.255977       | 8 |
| 3 | 373.187032 | 187.097154      | 356.160483     | 178.583879       | Q    | 847.478464 | 424.242870      | 830.451915     | 415.729595       | 7 |
| 4 | 472.255446 | 236.631361      | 455.228897     | 228.118087       | V    | 719.419886 | 360.213581      | 702.393337     | 351.700306       | 6 |
| 5 | 600.314024 | 300.660650      | 583.287475     | 292.147376       | Q    | 620.351472 | 310.679374      | 603.324923     | 302.166099       | 5 |
| 6 | 671.351138 | 336.179207      | 654.324589     | 327.665933       | A    | 492.292894 | 246.650085      | 475.266345     | 238.136810       | 4 |
| 7 | 818.419552 | 409.713414      | 801.393003     | 401.200139       | F    | 421.255780 | 211.131528      | 404.229231     | 202.618253       | 3 |
| 8 | 917.487966 | 459.247621      | 900.461417     | 450.734346       | V    | 274.187366 | 137.597321      | 257.160817     | 129.084046       | 2 |
| 9 |            |                 |                |                  | R    | 175.118952 | 88.063114       | 158.092403     | 79.549839        | 1 |

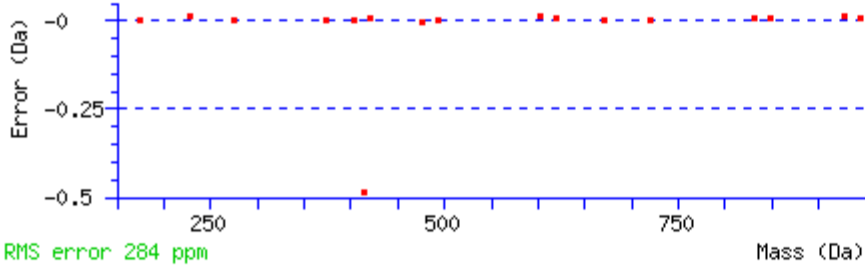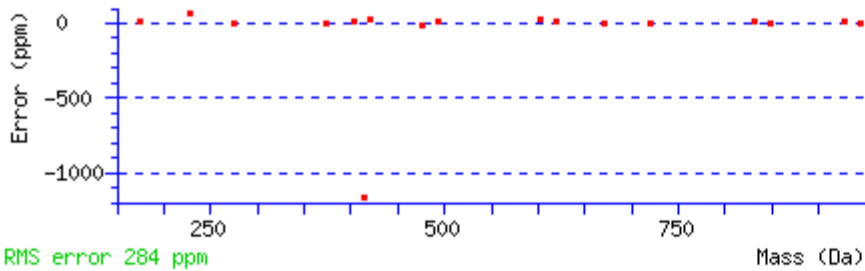

NCBI BLAST search of [FPQVQAFVR](#)  
 (Parameters: blastp, nr protein database, expect=20000, no filter, PAM30)  
 Other BLAST [web gateways](#)

**All matches to this query**

| Score | Mr(calc):   | Delta     | Sequence                  |
|-------|-------------|-----------|---------------------------|
| 59.9  | 1090.592377 | -0.000829 | <a href="#">FPQVQAFVR</a> |
| 2.8   | 1090.588318 | 0.003230  | <a href="#">NSPLYVRSR</a> |

# MASCOT SCIENCE Mascot Search Results

## Peptide View

### MS/MS Fragmentation of VWIYPEGTR

Found in **PLCB\_HUMAN**, 1-acyl-sn-glycerol-3-phosphate acyltransferase beta OS=Homo sapiens GN=AGPAT2 PE=1 SV=1

Match to Query 23267: 1119.579308 from(560.796930,2+) rtinseconds(2383) index(27751)

Title: Locus:1.1.1.2326.22

Data file 2011-11-13 - TFD - EP 7-5.mgf

Click mouse within plot area to zoom in by factor of two about that point

Or, Plot from  to  Da

Label all possible matches  Label matches used for scoring

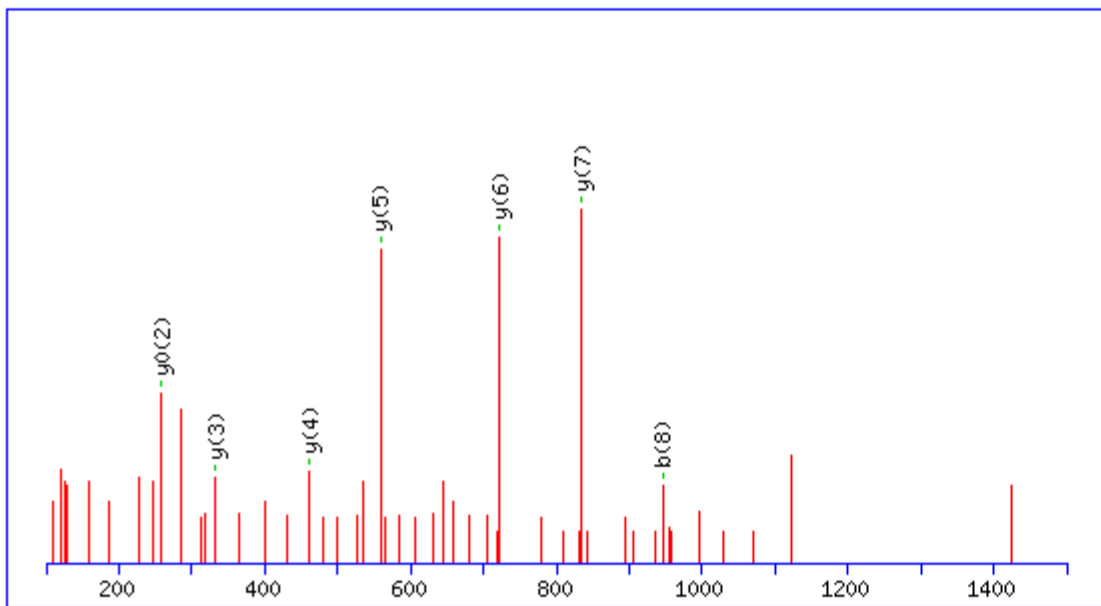

Monoisotopic mass of neutral peptide Mr(calc): 1119.571289

Fixed modifications: Propionamide (C) (apply to specified residues or termini only)

Ions Score: 33 Expect: 0.0061

Matches : 7/68 fragment ions using 10 most intense peaks ([help](#))

| # | b                 | b <sup>++</sup> | b <sup>0</sup> | b <sup>0++</sup> | Seq. | y                 | y <sup>++</sup> | y <sup>*</sup> | y <sup>*++</sup> | y <sup>0</sup>    | y <sup>0++</sup> | # |
|---|-------------------|-----------------|----------------|------------------|------|-------------------|-----------------|----------------|------------------|-------------------|------------------|---|
| 1 | 100.075690        | 50.541483       |                |                  | V    |                   |                 |                |                  |                   |                  | 9 |
| 2 | 286.155003        | 143.581140      |                |                  | W    | 1021.510158       | 511.258717      | 1004.483609    | 502.745443       | 1003.499593       | 502.253435       | 8 |
| 3 | 399.239067        | 200.123172      |                |                  | I    | <b>835.430845</b> | 418.219061      | 818.404296     | 409.705786       | 817.420280        | 409.213778       | 7 |
| 4 | 562.302396        | 281.654836      |                |                  | Y    | <b>722.346781</b> | 361.677029      | 705.320232     | 353.163754       | 704.336216        | 352.671746       | 6 |
| 5 | 659.355160        | 330.181218      |                |                  | P    | <b>559.283452</b> | 280.145364      | 542.256903     | 271.632090       | 541.272887        | 271.140082       | 5 |
| 6 | 788.397753        | 394.702515      | 770.387188     | 385.697232       | E    | <b>462.230688</b> | 231.618982      | 445.204139     | 223.105707       | 444.220123        | 222.613700       | 4 |
| 7 | 845.419217        | 423.213247      | 827.408652     | 414.207964       | G    | <b>333.188095</b> | 167.097685      | 316.161546     | 158.584411       | 315.177530        | 158.092403       | 3 |
| 8 | <b>946.466896</b> | 473.737086      | 928.456331     | 464.731804       | T    | 276.166631        | 138.586953      | 259.140082     | 130.073679       | <b>258.156066</b> | 129.581671       | 2 |
| 9 |                   |                 |                |                  | R    | 175.118952        | 88.063114       | 158.092403     | 79.549839        |                   |                  | 1 |

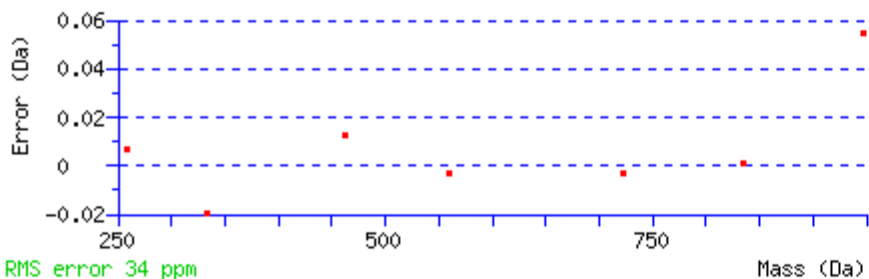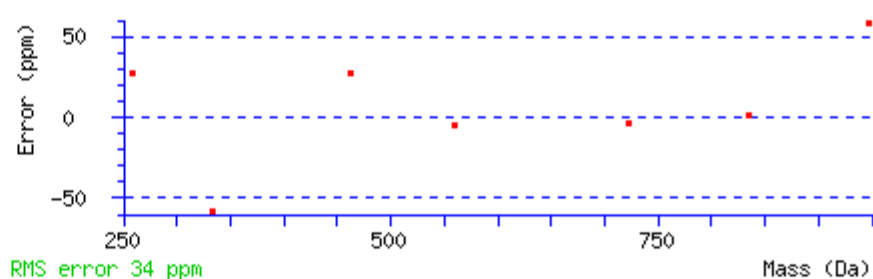

### NCBI BLAST search of VWIYPEGTR

(Parameters: blastp, nr protein database, expect=20000, no filter, PAM30)

Other BLAST [web gateways](#)

### All matches to this query

| Score | Mr(calc):   | Delta    | Sequence                  |
|-------|-------------|----------|---------------------------|
| 32.7  | 1119.571289 | 0.008019 | <a href="#">VWIYPEGTR</a> |

Mascot: <http://www.matrixscience.com/>

# **MATRIX** SCIENCE Mascot Search Results

## Peptide View

### MS/MS Fragmentation of **ILDSIYK**

Found in **PLCH1\_HUMAN**, 1-phosphatidylinositol-4,5-bisphosphate phosphodiesterase eta-1 OS=Homo sapiens GN=PLCH1 PE=1 SV=1

Match to Query 14098: 963.567548 from(482.791050,2+) rtinseconds(2498) index(31505)

Title: Locus:1.1.1.2378.10

Data file 2011-11-14 - TFD - EP 8-2.mgf

Click mouse within plot area to zoom in by factor of two about that point

Or, Plot from  to  Da

Label all possible matches  Label matches used for scoring

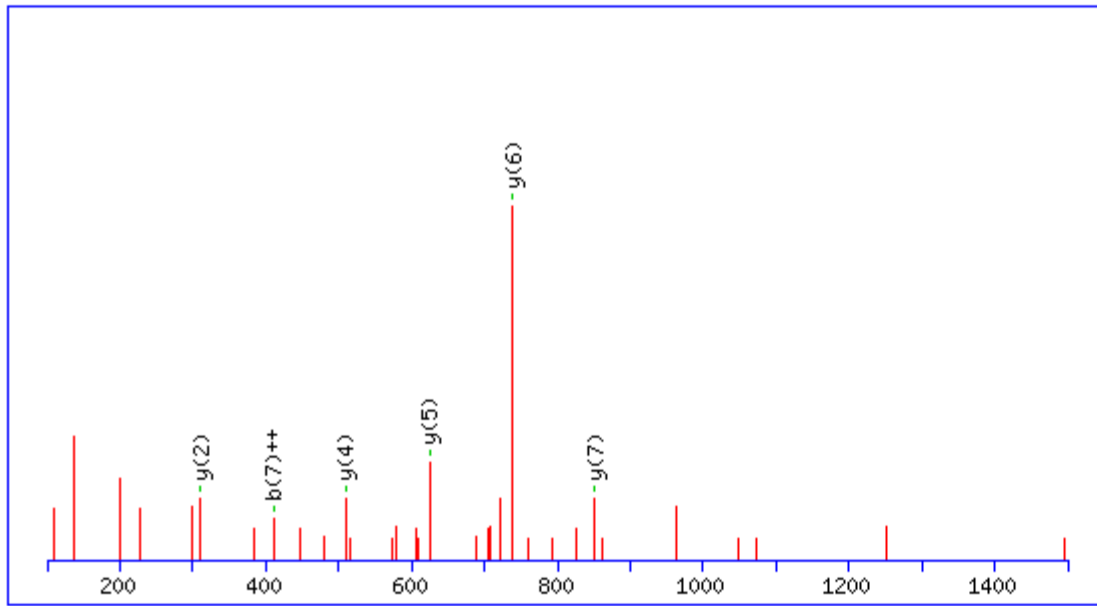

Monoisotopic mass of neutral peptide Mr(calc): 963.564056

Fixed modifications: Propionamide (C) (apply to specified residues or termini only)

Ions Score: 37 Expect: 0.0005

Matches : 6/58 fragment ions using 8 most intense peaks [\(help\)](#)

| # | b          | b <sup>++</sup> | b <sup>0</sup> | b <sup>0++</sup> | Seq. | y          | y <sup>++</sup> | y <sup>*</sup> | y <sup>*++</sup> | y <sup>0</sup> | y <sup>0++</sup> | # |
|---|------------|-----------------|----------------|------------------|------|------------|-----------------|----------------|------------------|----------------|------------------|---|
| 1 | 114.091340 | 57.549308       |                |                  | I    |            |                 |                |                  |                |                  | 8 |
| 2 | 227.175404 | 114.091340      |                |                  | L    | 851.487296 | 426.247286      | 834.460747     | 417.734012       | 833.476731     | 417.242004       | 7 |
| 3 | 340.259468 | 170.633372      |                |                  | I    | 738.403232 | 369.705254      | 721.376683     | 361.191980       | 720.392667     | 360.699972       | 6 |
| 4 | 455.286411 | 228.146843      | 437.275846     | 219.141561       | D    | 625.319168 | 313.163222      | 608.292619     | 304.649948       | 607.308603     | 304.157940       | 5 |
| 5 | 542.318439 | 271.662858      | 524.307874     | 262.657575       | S    | 510.292225 | 255.649751      | 493.265676     | 247.136476       | 492.281660     | 246.644468       | 4 |
| 6 | 655.402503 | 328.204890      | 637.391938     | 319.199607       | I    | 423.260197 | 212.133737      | 406.233648     | 203.620462       |                |                  | 3 |
| 7 | 818.465832 | 409.736554      | 800.455267     | 400.731272       | Y    | 310.176133 | 155.591705      | 293.149584     | 147.078430       |                |                  | 2 |
| 8 |            |                 |                |                  | K    | 147.112804 | 74.060040       | 130.086255     | 65.546765        |                |                  | 1 |

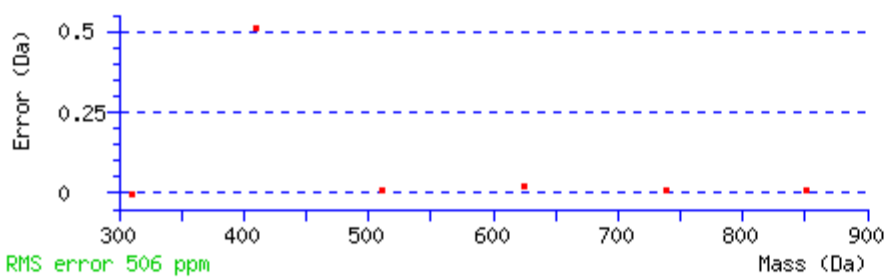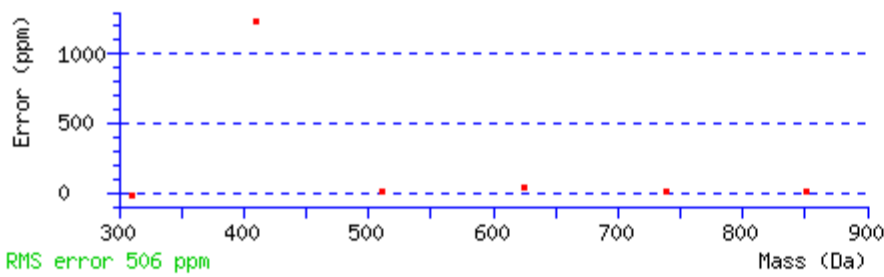

### NCBI BLAST search of **ILDSIYK**

(Parameters: blastp, nr protein database, expect=20000, no filter, PAM30)

Other BLAST [web gateways](#)

### All matches to this query

| Score | Mr(calc):  | Delta    | Sequence                 |
|-------|------------|----------|--------------------------|
| 37.5  | 963.564056 | 0.003492 | <a href="#">ILDSIYK</a>  |
| 11.5  | 963.564056 | 0.003492 | <a href="#">LLEIVSYK</a> |

# MASCOT Search Results

## Peptide View

MS/MS Fragmentation of **DKPELQFPFLQDEDTVATLLECK**

Found in **CN37\_HUMAN**, 2',3'-cyclic-nucleotide 3'-phosphodiesterase OS=Homo sapiens GN=CNP PE=1 SV=2

Match to Query 75013: 2749.350372 from(917.457400,3+) rtinseconds(4465) index(68571)

Title: Locus:1.1.1.2985.35

Data file 2011-11-12 - TFD - EP 6-4.mgf

Click mouse within plot area to zoom in by factor of two about that point

Or, Plot from  to  Da

Label all possible matches  Label matches used for scoring

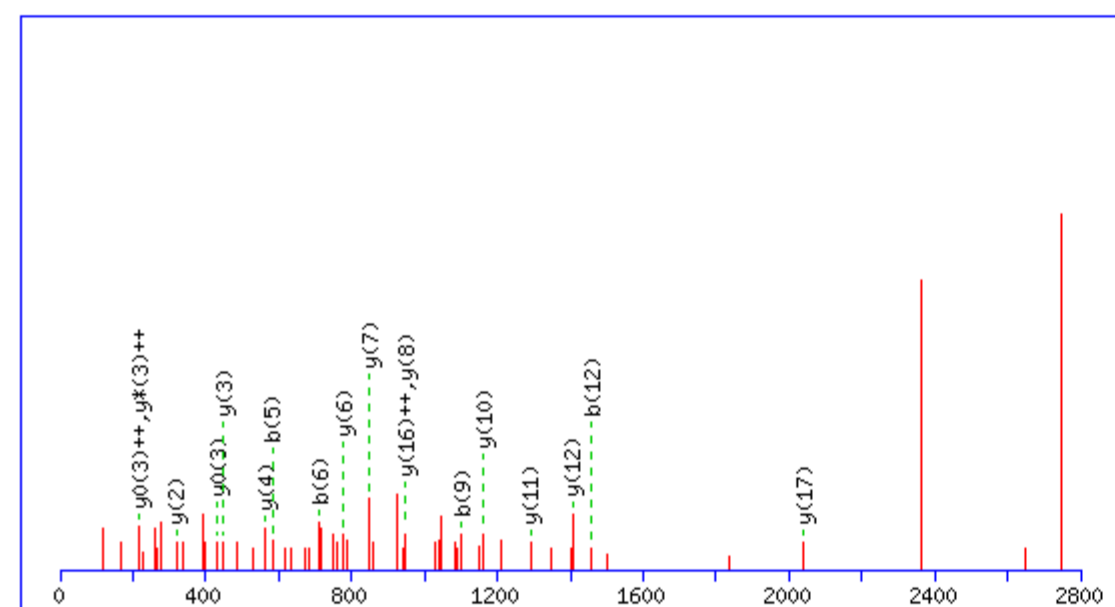

Monoisotopic mass of neutral peptide Mr(calc): 2749.352036

Fixed modifications: Propionamide (C) (apply to specified residues or termini only)

Ions Score: 48 Expect: 3.3e-005

Matches : 18/258 fragment ions using 32 most intense peaks [\(help\)](#)

| #  | b                  | b <sup>++</sup> | b <sup>*</sup> | b <sup>+++</sup> | b <sup>0</sup> | b <sup>0++</sup> | Seq. | y                  | y <sup>++</sup>   | y <sup>*</sup> | y <sup>+++</sup>  | y <sup>0</sup>    | y <sup>0++</sup>  | #  |
|----|--------------------|-----------------|----------------|------------------|----------------|------------------|------|--------------------|-------------------|----------------|-------------------|-------------------|-------------------|----|
| 1  | 116.034219         | 58.520748       |                |                  | 98.023654      | 49.515465        | D    |                    |                   |                |                   |                   |                   | 23 |
| 2  | 244.129182         | 122.568229      | 227.102633     | 114.054955       | 226.118617     | 113.562947       | K    | 2635.332385        | 1318.169830       | 2618.305836    | 1309.656556       | 2617.321820       | 1309.164548       | 22 |
| 3  | 341.181946         | 171.094611      | 324.155397     | 162.581336       | 323.171381     | 162.089328       | P    | 2507.237422        | 1254.122349       | 2490.210873    | 1245.609074       | 2489.226857       | 1245.117066       | 21 |
| 4  | 470.224539         | 235.615907      | 453.197990     | 227.102633       | 452.213974     | 226.610625       | E    | 2410.184658        | 1205.595967       | 2393.158109    | 1197.082692       | 2392.174093       | 1196.590684       | 20 |
| 5  | <b>583.308603</b>  | 292.157940      | 566.282054     | 283.644665       | 565.298038     | 283.152657       | L    | 2281.142065        | 1141.074670       | 2264.115516    | 1132.561396       | 2263.131500       | 1132.069388       | 19 |
| 6  | <b>711.367181</b>  | 356.187229      | 694.340632     | 347.673954       | 693.356616     | 347.181946       | Q    | 2168.058001        | 1084.532638       | 2151.031452    | 1076.019364       | 2150.047436       | 1075.527356       | 18 |
| 7  | 858.435595         | 429.721436      | 841.409046     | 421.208161       | 840.425030     | 420.716153       | F    | <b>2039.999423</b> | 1020.503350       | 2022.972874    | 1011.990075       | 2021.988858       | 1011.498067       | 17 |
| 8  | 955.488359         | 478.247818      | 938.461810     | 469.734543       | 937.477794     | 469.242535       | P    | 1892.931009        | <b>946.969143</b> | 1875.904460    | 938.455868        | 1874.920444       | 937.963860        | 16 |
| 9  | <b>1102.556773</b> | 551.782025      | 1085.530224    | 543.268750       | 1084.546208    | 542.776742       | F    | 1795.878245        | 898.442761        | 1778.851696    | 889.929486        | 1777.867680       | 889.437478        | 15 |
| 10 | 1215.640837        | 608.324056      | 1198.614288    | 599.810782       | 1197.630272    | 599.318774       | L    | 1648.809831        | 824.908554        | 1631.783282    | 816.395279        | 1630.799266       | 815.903271        | 14 |
| 11 | 1343.699415        | 672.353345      | 1326.672866    | 663.840071       | 1325.688850    | 663.348063       | Q    | 1535.725767        | 768.366522        | 1518.699218    | 759.853247        | 1517.715202       | 759.361239        | 13 |
| 12 | <b>1458.726358</b> | 729.866817      | 1441.699809    | 721.353543       | 1440.715793    | 720.861534       | D    | <b>1407.667189</b> | 704.337233        | 1390.640640    | 695.823958        | 1389.656624       | 695.331950        | 12 |
| 13 | 1587.768951        | 794.388113      | 1570.742402    | 785.874839       | 1569.758386    | 785.382831       | E    | <b>1292.640246</b> | 646.823761        | 1275.613697    | 638.310487        | 1274.629681       | 637.818479        | 11 |
| 14 | 1702.795894        | 851.901585      | 1685.769345    | 843.388310       | 1684.785329    | 842.896302       | D    | <b>1163.597653</b> | 582.302465        | 1146.571104    | 573.789190        | 1145.587088       | 573.297182        | 10 |
| 15 | 1803.843573        | 902.425424      | 1786.817024    | 893.912150       | 1785.833008    | 893.420142       | T    | 1048.570710        | 524.788993        | 1031.544161    | 516.275719        | 1030.560145       | 515.783711        | 9  |
| 16 | 1902.911987        | 951.959632      | 1885.885438    | 943.446357       | 1884.901422    | 942.954349       | V    | <b>947.523031</b>  | 474.265154        | 930.496482     | 465.751879        | 929.512466        | 465.259871        | 8  |
| 17 | 1973.949101        | 987.478188      | 1956.922552    | 978.964914       | 1955.938536    | 978.472906       | A    | <b>848.454617</b>  | 424.730947        | 831.428068     | 416.217672        | 830.444052        | 415.725664        | 7  |
| 18 | 2074.996780        | 1038.002028     | 2057.970231    | 1029.488753      | 2056.986215    | 1028.996745      | T    | <b>777.417503</b>  | 389.212390        | 760.390954     | 380.699115        | 759.406938        | 380.207107        | 6  |
| 19 | 2188.080844        | 1094.544060     | 2171.054295    | 1086.030785      | 2170.070279    | 1085.538777      | L    | 676.369824         | 338.688550        | 659.343275     | 330.175276        | 658.359259        | 329.683268        | 5  |
| 20 | 2301.164908        | 1151.086092     | 2284.138359    | 1142.572817      | 2283.154343    | 1142.080809      | L    | <b>563.285760</b>  | 282.146518        | 546.259211     | 273.633244        | 545.275195        | 273.141236        | 4  |
| 21 | 2430.207501        | 1215.607388     | 2413.180952    | 1207.094114      | 2412.196936    | 1206.602106      | E    | <b>450.201696</b>  | 225.604486        | 433.175147     | <b>217.091212</b> | <b>432.191131</b> | <b>216.599204</b> | 3  |
| 22 | 2604.253800        | 1302.630538     | 2587.227251    | 1294.117263      | 2586.243235    | 1293.625255      | C    | <b>321.159103</b>  | 161.083190        | 304.132554     | 152.569915        |                   |                   | 2  |
| 23 |                    |                 |                |                  |                |                  | K    | 147.112804         | 74.060040         | 130.086255     | 65.546765         |                   |                   | 1  |

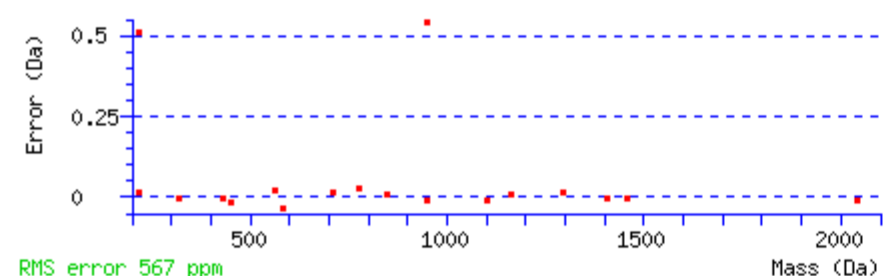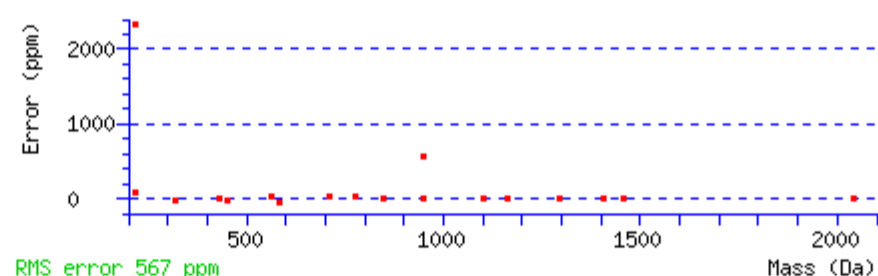

NCBI BLAST search of [DKPELQFPFLQDEDTVATLLECK](#)

(Parameters: blastp, nr protein database, expect=20000, no filter, PAM30)

Other BLAST [web gateways](#)

## All matches to this query

| Score | Mr(calc):   | Delta     | Sequence                                        |
|-------|-------------|-----------|-------------------------------------------------|
| 47.9  | 2749.352036 | -0.001664 | <a href="#">DKPELQFPFLQDEDTVATLLECK</a>         |
| 0.0   | 2749.353195 | -0.002823 | <a href="#">AVFPPEPGAAPKPGGAAAEGAGPGAARGAQR</a> |

# MASCOT Search Results

## Peptide View

MS/MS Fragmentation of **LSLEFGDPASSLFR**

Found in **PDE12\_HUMAN**, 2',5'-phosphodiesterase 12 OS=Homo sapiens GN=PDE12 PE=1 SV=2

Match to Query 49757: 1537.786868 from(769.900710,2+) rtinseconds(3789) index(55486)

Title: Locus:1.1.1.2857.42

Data file 2011-11-14 - TFD - EP 8-2.mgf

Click mouse within plot area to zoom in by factor of two about that point

Or, Plot from  to  Da

Label all possible matches  Label matches used for scoring

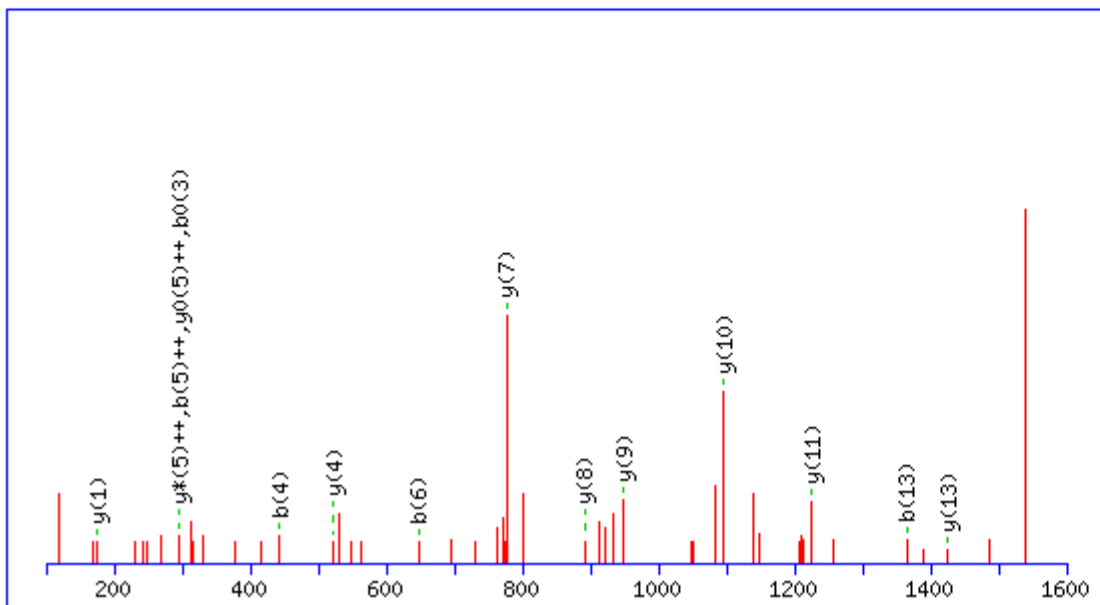

Monoisotopic mass of neutral peptide Mr(calc): 1537.777649

Fixed modifications: Propionamide (C) (apply to specified residues or termini only)

Ions Score: 43 Expect: 0.00044

Matches : 15/122 fragment ions using 27 most intense peaks ([help](#))

| #  | b           | b <sup>++</sup> | b <sup>0</sup> | b <sup>0++</sup> | Seq. | y           | y <sup>++</sup> | y <sup>*</sup> | y <sup>+++</sup> | y <sup>0</sup> | y <sup>0++</sup> | #  |
|----|-------------|-----------------|----------------|------------------|------|-------------|-----------------|----------------|------------------|----------------|------------------|----|
| 1  | 114.091340  | 57.549308       |                |                  | L    |             |                 |                |                  |                |                  | 14 |
| 2  | 201.123368  | 101.065322      | 183.112803     | 92.060039        | S    | 1425.700870 | 713.354073      | 1408.674321    | 704.840799       | 1407.690305    | 704.348791       | 13 |
| 3  | 314.207432  | 157.607354      | 296.196867     | 148.602071       | L    | 1338.668842 | 669.838059      | 1321.642293    | 661.324785       | 1320.658277    | 660.832777       | 12 |
| 4  | 443.250025  | 222.128650      | 425.239460     | 213.123368       | E    | 1225.584778 | 613.296027      | 1208.558229    | 604.782753       | 1207.574213    | 604.290745       | 11 |
| 5  | 590.318439  | 295.662858      | 572.307874     | 286.657575       | F    | 1096.542185 | 548.774731      | 1079.515636    | 540.261456       | 1078.531620    | 539.769448       | 10 |
| 6  | 647.339903  | 324.173590      | 629.329338     | 315.168307       | G    | 949.473771  | 475.240524      | 932.447222     | 466.727249       | 931.463206     | 466.235241       | 9  |
| 7  | 762.366846  | 381.687061      | 744.356281     | 372.681779       | D    | 892.452307  | 446.729792      | 875.425758     | 438.216517       | 874.441742     | 437.724509       | 8  |
| 8  | 859.419610  | 430.213443      | 841.409045     | 421.208161       | P    | 777.425364  | 389.216320      | 760.398815     | 380.703046       | 759.414799     | 380.211038       | 7  |
| 9  | 930.456724  | 465.732000      | 912.446159     | 456.726718       | A    | 680.372600  | 340.689938      | 663.346051     | 332.176664       | 662.362035     | 331.684656       | 6  |
| 10 | 1017.488752 | 509.248014      | 999.478187     | 500.242731       | S    | 609.335486  | 305.171381      | 592.308937     | 296.658107       | 591.324921     | 296.166099       | 5  |
| 11 | 1104.520780 | 552.764028      | 1086.510215    | 543.758746       | S    | 522.303458  | 261.655367      | 505.276909     | 253.142093       | 504.292893     | 252.650085       | 4  |
| 12 | 1217.604844 | 609.306060      | 1199.594279    | 600.300777       | L    | 435.271430  | 218.139353      | 418.244881     | 209.626078       |                |                  | 3  |
| 13 | 1364.673258 | 682.840267      | 1346.662693    | 673.834985       | F    | 322.187366  | 161.597321      | 305.160817     | 153.084047       |                |                  | 2  |
| 14 |             |                 |                |                  | R    | 175.118952  | 88.063114       | 158.092403     | 79.549839        |                |                  | 1  |

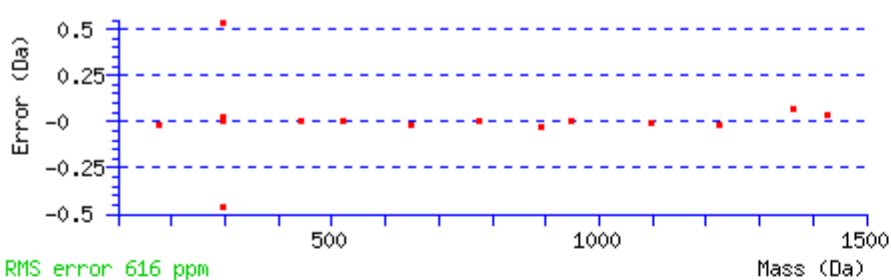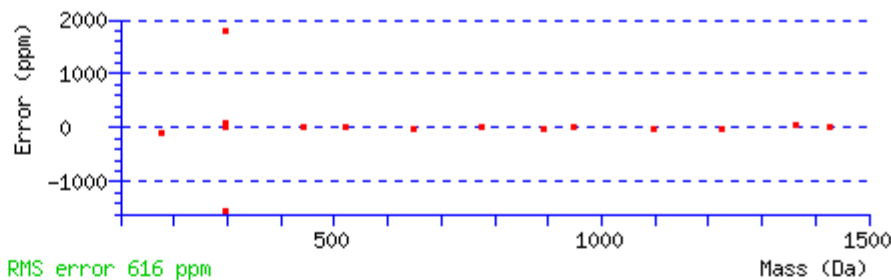

NCBI BLAST search of **LSLEFGDPASSLFR**

(Parameters: blastp, nr protein database, expect=20000, no filter, PAM30)

Other BLAST [web gateways](#)

## All matches to this query

| Score | Mr(calc):   | Delta     | Sequence                       |
|-------|-------------|-----------|--------------------------------|
| 42.6  | 1537.777649 | 0.009219  | <a href="#">LSLEFGDPASSLFR</a> |
| 6.5   | 1537.788895 | -0.002027 | <a href="#">IVVPPHLGYGEEGR</a> |
| 3.0   | 1537.788895 | -0.002027 | <a href="#">IVVPPHLGYGEEGR</a> |
| 2.0   | 1537.792908 | -0.006040 | <a href="#">LLSGPYFWSLPSR</a>  |

# **MASCOT** Mascot Search Results

## Peptide View

MS/MS Fragmentation of **QRPTKLK**

Found in **OAS1\_HUMAN**, 2'-5'-oligoadenylate synthase 1 OS=Homo sapiens GN=OAS1 PE=1 SV=4

Match to Query 4554: 869.539008 from(435.776780,2+) rtinseconds(1614) index(4113)

Title: Locus:1.1.1.2271.5

Data file 2011-11-13 - TFD - EP 7-8.mgf

Click mouse within plot area to zoom in by factor of two about that point

Or, Plot from  to  Da

Label all possible matches  Label matches used for scoring

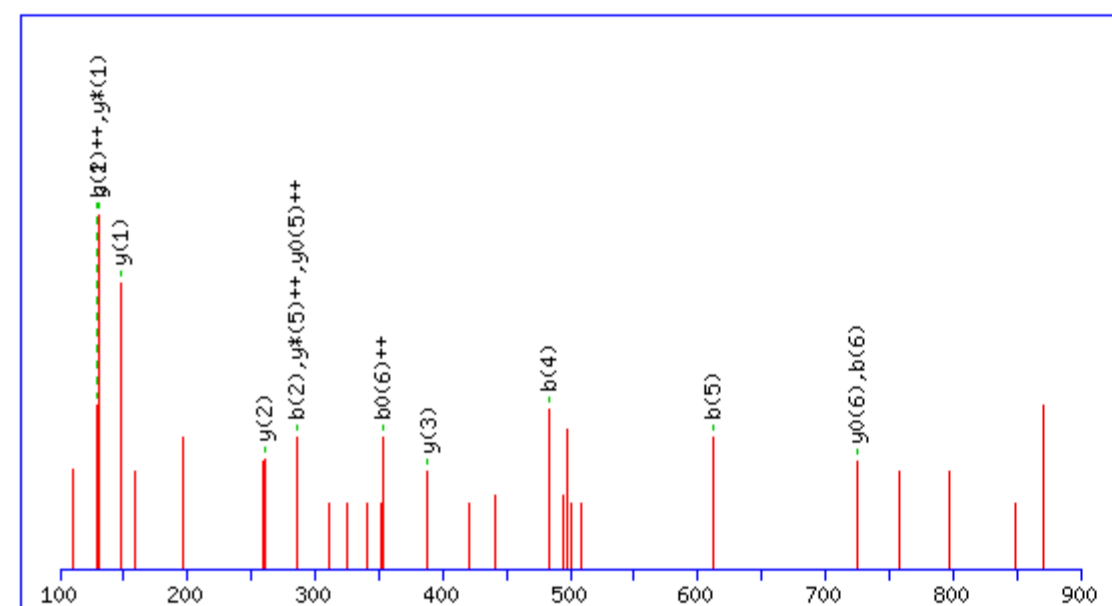

Monoisotopic mass of neutral peptide  $M_r(\text{calc})$ : 869.544662

Fixed modifications: Propionamide (C) (apply to specified residues or termini only)

Ions Score: 34 Expect: 0.003

Matches : 14/60 fragment ions using 17 most intense peaks ([help](#))

| # | b                 | b <sup>++</sup> | b <sup>*</sup> | b <sup>+++</sup> | b <sup>0</sup> | b <sup>0++</sup>  | Seq. | y                 | y <sup>++</sup>   | y <sup>*</sup>    | y <sup>+++</sup>  | y <sup>0</sup>    | y <sup>0++</sup>  | # |
|---|-------------------|-----------------|----------------|------------------|----------------|-------------------|------|-------------------|-------------------|-------------------|-------------------|-------------------|-------------------|---|
| 1 | <b>129.065854</b> | 65.036565       | 112.039305     | 56.523291        |                |                   | Q    |                   |                   |                   |                   |                   |                   | 7 |
| 2 | <b>285.166965</b> | 143.087121      | 268.140416     | 134.573846       |                |                   | R    | 742.493385        | 371.750331        | 725.466836        | 363.237056        | <b>724.482820</b> | 362.745048        | 6 |
| 3 | 382.219729        | 191.613502      | 365.193180     | 183.100228       |                |                   | P    | 586.392274        | 293.699775        | 569.365725        | <b>285.186501</b> | 568.381709        | <b>284.694493</b> | 5 |
| 4 | <b>483.267408</b> | 242.137342      | 466.240859     | 233.624068       | 465.256843     | 233.132060        | T    | 489.339510        | 245.173393        | 472.312961        | 236.660119        | 471.328945        | 236.168111        | 4 |
| 5 | <b>611.362371</b> | 306.184824      | 594.335822     | 297.671549       | 593.351806     | 297.179541        | K    | <b>388.291831</b> | 194.649554        | 371.265282        | 186.136279        |                   |                   | 3 |
| 6 | <b>724.446435</b> | 362.726856      | 707.419886     | 354.213581       | 706.435870     | <b>353.721573</b> | L    | <b>260.196868</b> | <b>130.602072</b> | 243.170319        | 122.088798        |                   |                   | 2 |
| 7 |                   |                 |                |                  |                |                   | K    | <b>147.112804</b> | 74.060040         | <b>130.086255</b> | 65.546765         |                   |                   | 1 |

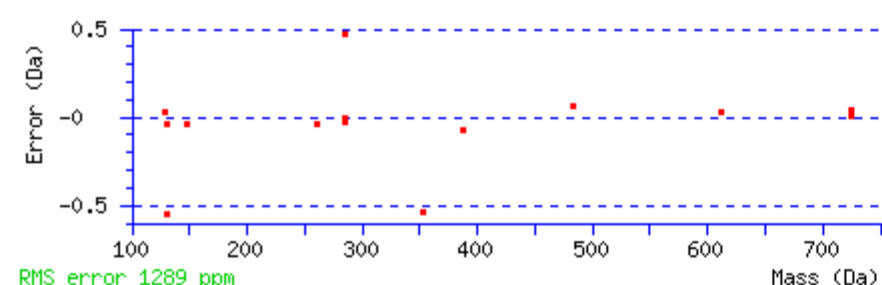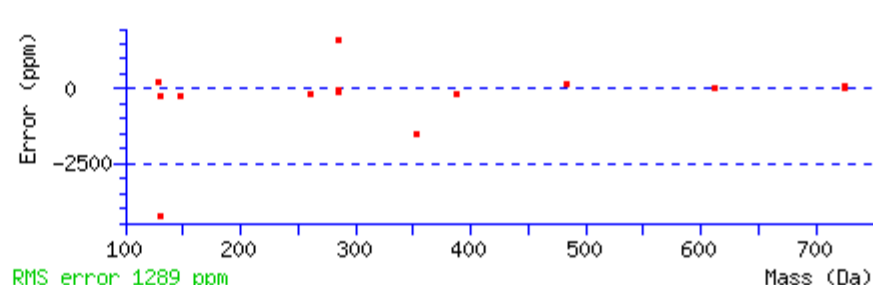

NCBI BLAST search of **QRPTKLK**

(Parameters: blastp, nr protein database, expect=20000, no filter, PAM30)

Other BLAST [web gateways](#)

All matches to this query

| Score | $M_r(\text{calc})$ | Delta     | Sequence                 |
|-------|--------------------|-----------|--------------------------|
| 34.3  | 869.544662         | -0.005654 | <a href="#">QRPTKLK</a>  |
| 29.9  | 869.533432         | 0.005576  | <a href="#">LKQIGALQ</a> |
| 22.2  | 869.533432         | 0.005576  | <a href="#">KAAVPQIK</a> |
| 22.2  | 869.533432         | 0.005576  | <a href="#">KPKPKPK</a>  |
| 22.2  | 869.533432         | 0.005576  | <a href="#">QPQLKLK</a>  |
| 22.1  | 869.533432         | 0.005576  | <a href="#">KPLKQPK</a>  |
| 20.2  | 869.533432         | 0.005576  | <a href="#">QLQQLLK</a>  |
| 20.2  | 869.533432         | 0.005576  | <a href="#">QQLQLLK</a>  |
| 18.5  | 869.544662         | -0.005654 | <a href="#">TRKPKPK</a>  |
| 18.2  | 869.533432         | 0.005576  | <a href="#">QKQIIPK</a>  |

# **MATRIX** SCIENCE Mascot Search Results

## Peptide View

MS/MS Fragmentation of **GGSSAKGTALR**

Found in **OAS3\_HUMAN**, 2'-5'-oligoadenylate synthase 3 OS=Homo sapiens GN=OAS3 PE=1 SV=3

Match to Query 15905: 1003.533808 from(502.774180,2+) rtinseconds(1789) index(18447)

Title: Locus:1.1.1.2093.24

Data file 2011-11-14 - TFD - EP 8-1.mgf

Click mouse within plot area to zoom in by factor of two about that point

Or, Plot from  to  Da

Label all possible matches  Label matches used for scoring

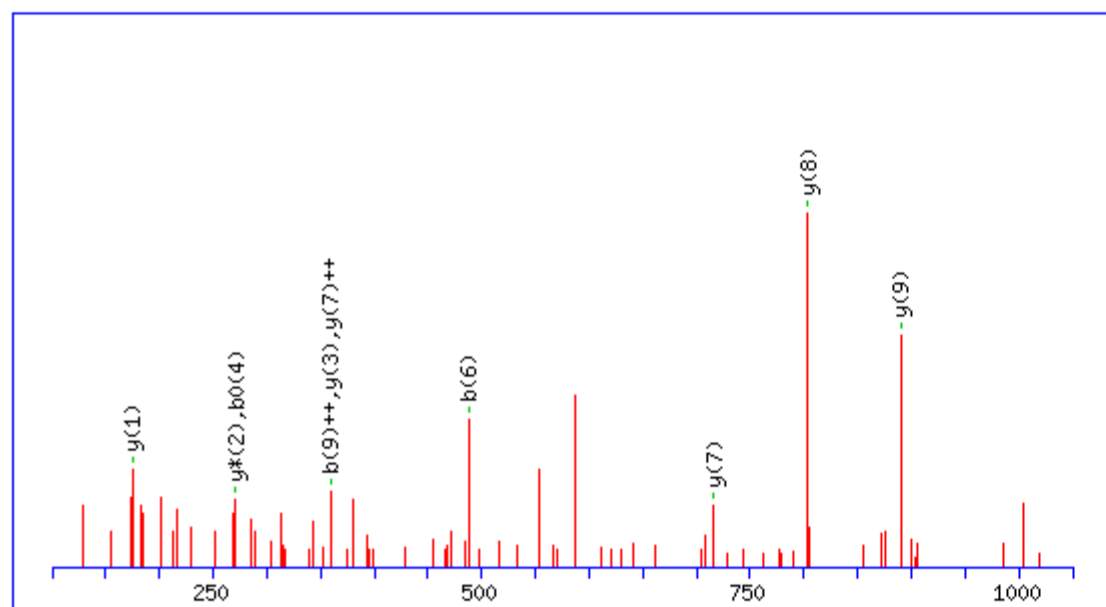

Monoisotopic mass of neutral peptide Mr(calc): 1003.541046

Fixed modifications: Propionamide (C) (apply to specified residues or termini only)

Ions Score: 35 Expect: 0.0019

Matches : 10/100 fragment ions using 9 most intense peaks [\(help\)](#)

| #  | b                 | b <sup>++</sup>   | b <sup>*</sup> | b <sup>+++</sup> | b <sup>0</sup>    | b <sup>0++</sup> | Seq. | y                 | y <sup>++</sup>   | y <sup>*</sup>    | y <sup>+++</sup> | y <sup>0</sup> | y <sup>0++</sup> | #  |
|----|-------------------|-------------------|----------------|------------------|-------------------|------------------|------|-------------------|-------------------|-------------------|------------------|----------------|------------------|----|
| 1  | 58.028740         | 29.518008         |                |                  |                   |                  | G    |                   |                   |                   |                  |                |                  | 11 |
| 2  | 115.050204        | 58.028740         |                |                  |                   |                  | G    | 947.526870        | 474.267073        | 930.500321        | 465.753799       | 929.516305     | 465.261791       | 10 |
| 3  | 202.082232        | 101.544754        |                |                  | 184.071667        | 92.539471        | S    | <b>890.505406</b> | 445.756341        | 873.478857        | 437.243067       | 872.494841     | 436.751059       | 9  |
| 4  | 289.114260        | 145.060768        |                |                  | <b>271.103695</b> | 136.055486       | S    | <b>803.473378</b> | 402.240327        | 786.446829        | 393.727053       | 785.462813     | 393.235045       | 8  |
| 5  | 360.151374        | 180.579325        |                |                  | 342.140809        | 171.574042       | A    | <b>716.441350</b> | <b>358.724313</b> | 699.414801        | 350.211039       | 698.430785     | 349.719031       | 7  |
| 6  | <b>488.246337</b> | 244.626806        | 471.219788     | 236.113532       | 470.235772        | 235.621524       | K    | 645.404236        | 323.205756        | 628.377687        | 314.692482       | 627.393671     | 314.200474       | 6  |
| 7  | 545.267801        | 273.137539        | 528.241252     | 264.624264       | 527.257236        | 264.132256       | G    | 517.309273        | 259.158275        | 500.282724        | 250.645000       | 499.298708     | 250.152992       | 5  |
| 8  | 646.315480        | 323.661378        | 629.288931     | 315.148104       | 628.304915        | 314.656096       | T    | 460.287809        | 230.647542        | 443.261260        | 222.134268       | 442.277244     | 221.642260       | 4  |
| 9  | 717.352594        | <b>359.179935</b> | 700.326045     | 350.666661       | 699.342029        | 350.174653       | A    | <b>359.240130</b> | 180.123703        | 342.213581        | 171.610428       |                |                  | 3  |
| 10 | 830.436658        | 415.721967        | 813.410109     | 407.208693       | 812.426093        | 406.716685       | L    | 288.203016        | 144.605146        | <b>271.176467</b> | 136.091871       |                |                  | 2  |
| 11 |                   |                   |                |                  |                   |                  | R    | <b>175.118952</b> | 88.063114         | 158.092403        | 79.549839        |                |                  | 1  |

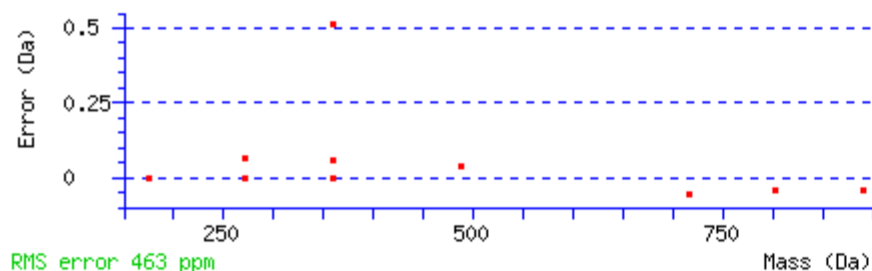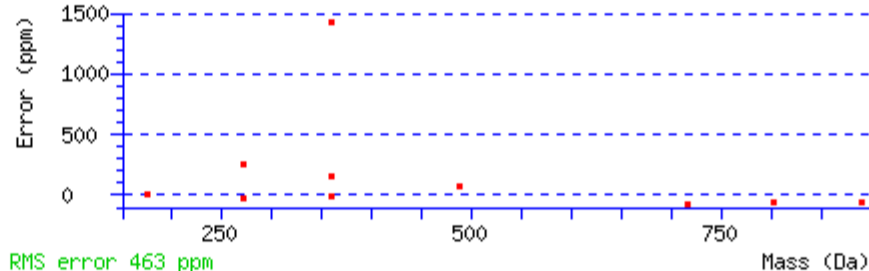

NCBI BLAST search of [GGSSAKGTALR](#)

(Parameters: blastp, nr protein database, expect=20000, no filter, PAM30)

Other BLAST [web gateways](#)

## All matches to this query

| Score | Mr(calc):   | Delta     | Sequence                    |
|-------|-------------|-----------|-----------------------------|
| 34.7  | 1003.541046 | -0.007238 | <a href="#">GGSSAKGTALR</a> |
| 5.6   | 1003.529800 | 0.004008  | <a href="#">SLAASSPSIR</a>  |
| 2.6   | 1003.529816 | 0.003992  | <a href="#">TDKGDLSLR</a>   |



# **MATRIX** SCIENCE Mascot Search Results

## Peptide View

MS/MS Fragmentation of **LVLDPYLLK**

Found in **RT17\_HUMAN**, 28S ribosomal protein S17, mitochondrial OS=Homo sapiens GN=MRPS17 PE=1 SV=1

Match to Query 21007: 1072.652448 from(537.333500,2+) rtinseconds(3267) index(42987)

Title: Locus:1.1.1.2534.16

Data file 2011-11-13 - TFD - EP 7-6.mgf

Click mouse within plot area to zoom in by factor of two about that point

Or, Plot from  to  Da

Label all possible matches  Label matches used for scoring

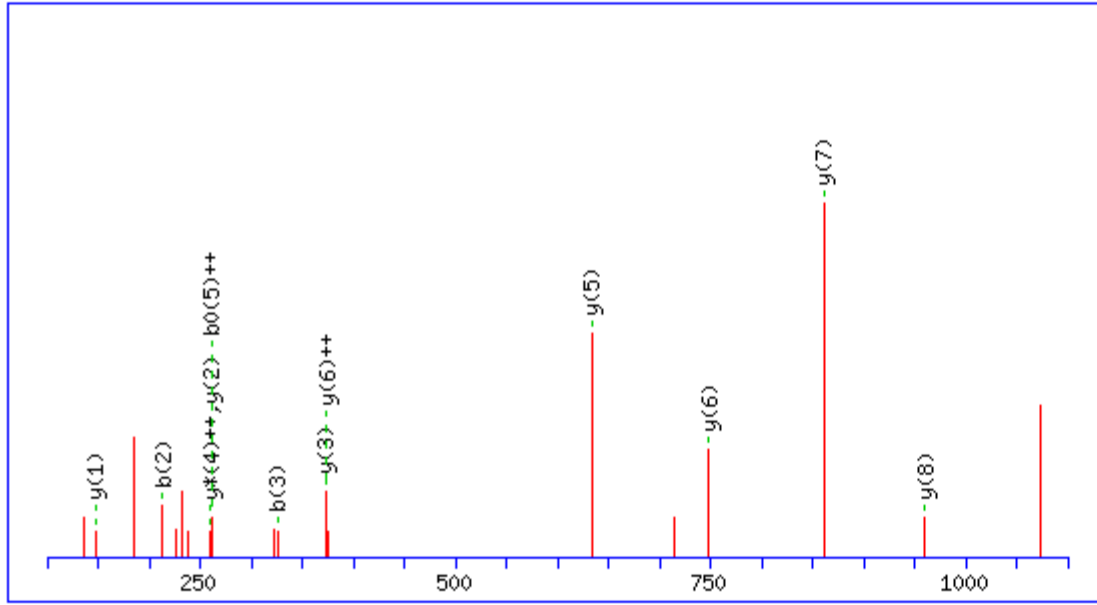

Monoisotopic mass of neutral peptide Mr(calc): 1072.653214

Fixed modifications: Propionamide (C) (apply to specified residues or termini only)

Ions Score: 50 Expect: 9.4e-006

Matches : 12/64 fragment ions using 19 most intense peaks [\(help\)](#)

| # | b                 | b <sup>++</sup> | b <sup>0</sup> | b <sup>0++</sup>  | Seq. | y                 | y <sup>++</sup>   | y <sup>*</sup> | y <sup>*++</sup>  | y <sup>0</sup> | y <sup>0++</sup> | # |
|---|-------------------|-----------------|----------------|-------------------|------|-------------------|-------------------|----------------|-------------------|----------------|------------------|---|
| 1 | 114.091340        | 57.549308       |                |                   | L    |                   |                   |                |                   |                |                  | 9 |
| 2 | <b>213.159754</b> | 107.083515      |                |                   | V    | <b>960.576446</b> | 480.791861        | 943.549897     | 472.278587        | 942.565881     | 471.786579       | 8 |
| 3 | <b>326.243818</b> | 163.625547      |                |                   | L    | <b>861.508032</b> | 431.257654        | 844.481483     | 422.744380        | 843.497467     | 422.252372       | 7 |
| 4 | 441.270761        | 221.139018      | 423.260196     | 212.133736        | D    | <b>748.423968</b> | <b>374.715622</b> | 731.397419     | 366.202348        | 730.413403     | 365.710340       | 6 |
| 5 | 538.323525        | 269.665401      | 520.312960     | <b>260.660118</b> | P    | <b>633.397025</b> | 317.202151        | 616.370476     | 308.688876        |                |                  | 5 |
| 6 | 701.386854        | 351.197065      | 683.376289     | 342.191783        | Y    | 536.344261        | 268.675769        | 519.317712     | <b>260.162494</b> |                |                  | 4 |
| 7 | 814.470918        | 407.739097      | 796.460353     | 398.733815        | L    | <b>373.280932</b> | 187.144104        | 356.254383     | 178.630830        |                |                  | 3 |
| 8 | 927.554982        | 464.281129      | 909.544417     | 455.275847        | L    | <b>260.196868</b> | 130.602072        | 243.170319     | 122.088798        |                |                  | 2 |
| 9 |                   |                 |                |                   | K    | <b>147.112804</b> | 74.060040         | 130.086255     | 65.546765         |                |                  | 1 |

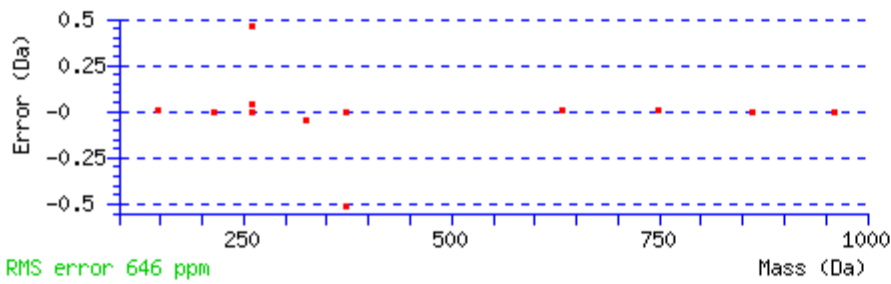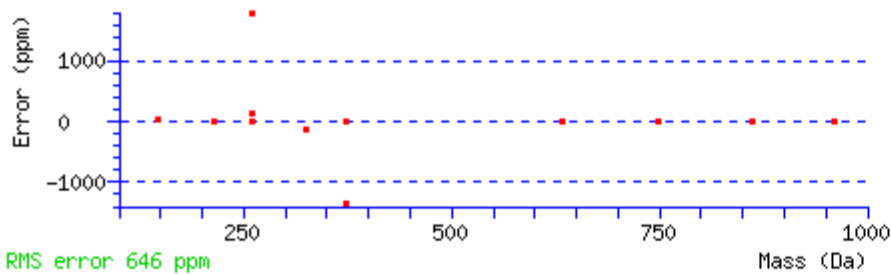

NCBI BLAST search of **LVLDPYLLK**

(Parameters: blastp, nr protein database, expect=20000, no filter, PAM30)

Other BLAST [web gateways](#)

## All matches to this query

| Score | Mr(calc):   | Delta     | Sequence                   |
|-------|-------------|-----------|----------------------------|
| 50.3  | 1072.653214 | -0.000766 | <a href="#">LVLDPYLLK</a>  |
| 11.3  | 1072.649200 | 0.003248  | <a href="#">VLSSLVTLNK</a> |

# Mascot Search Results

## Peptide View

MS/MS Fragmentation of **ILTMDGLIEDIK**

Found in **RT21\_HUMAN**, 28S ribosomal protein S21, mitochondrial OS=Homo sapiens GN=MRPS21 PE=1 SV=2

Match to Query 35353: 1375.726568 from(688.870560,2+) rtinseconds(2880) index(32335)

Title: Locus:1.1.1.2457.23

Data file 2011-11-14 - TFD - EP 8-7.mgf

Click mouse within plot area to zoom in by factor of two about that point

Or, Plot from  to  Da

Label all possible matches  Label matches used for scoring

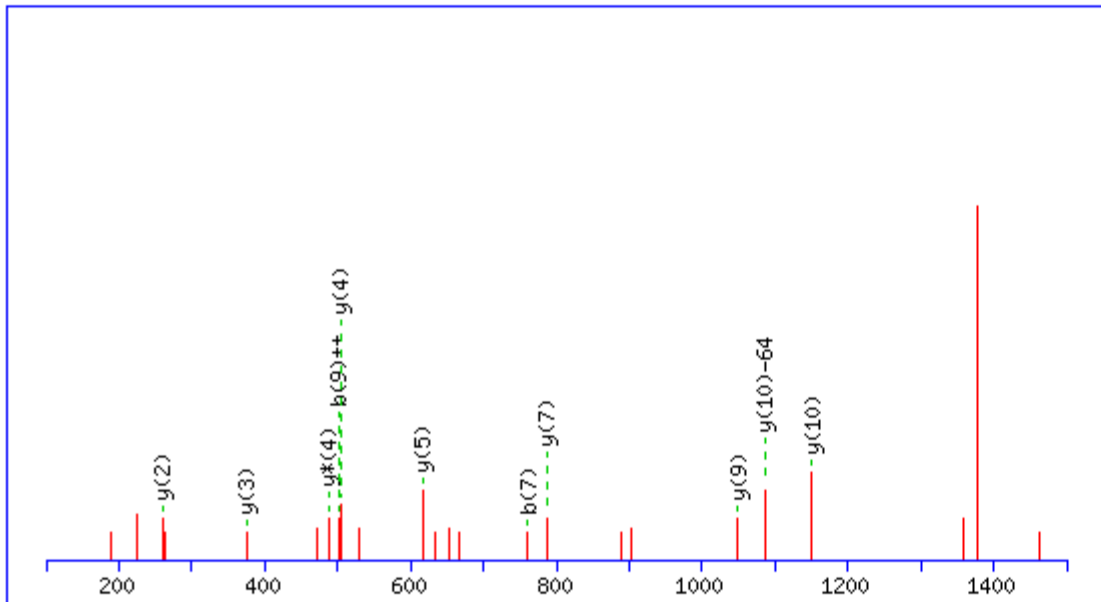

Monoisotopic mass of neutral peptide Mr(calc): 1375.726852

Fixed modifications: Propionamide (C) (apply to specified residues or termini only)

Variable modifications:

M4 : Oxidation (M), with neutral losses 0.000000 (shown in table), 63.998285

Ions Score: 49 Expect: 0.00027

Matches : 11/152 fragment ions using 17 most intense peaks [\(help\)](#)

| #  | b                 | b <sup>++</sup>   | b <sup>0</sup> | b <sup>0++</sup> | Seq. | y                  | y <sup>++</sup> | y <sup>*</sup>    | y <sup>*++</sup> | y <sup>0</sup> | y <sup>0++</sup> | #  |
|----|-------------------|-------------------|----------------|------------------|------|--------------------|-----------------|-------------------|------------------|----------------|------------------|----|
| 1  | 114.091340        | 57.549308         |                |                  | I    |                    |                 |                   |                  |                |                  | 12 |
| 2  | 227.175404        | 114.091340        |                |                  | L    | 1263.650082        | 632.328679      | 1246.623533       | 623.815405       | 1245.639517    | 623.323397       | 11 |
| 3  | 328.223083        | 164.615179        | 310.212518     | 155.609897       | T    | <b>1150.566018</b> | 575.786647      | 1133.539469       | 567.273373       | 1132.555453    | 566.781365       | 10 |
| 4  | 475.258483        | 238.132879        | 457.247918     | 229.127597       | M    | <b>1049.518339</b> | 525.262808      | 1032.491790       | 516.749533       | 1031.507774    | 516.257525       | 9  |
| 5  | 590.285426        | 295.646351        | 572.274861     | 286.641069       | D    | 902.482939         | 451.745108      | 885.456390        | 443.231833       | 884.472374     | 442.739825       | 8  |
| 6  | 647.306890        | 324.157083        | 629.296325     | 315.151801       | G    | <b>787.455996</b>  | 394.231636      | 770.429447        | 385.718362       | 769.445431     | 385.226354       | 7  |
| 7  | <b>760.390954</b> | 380.699115        | 742.380389     | 371.693833       | L    | 730.434532         | 365.720904      | 713.407983        | 357.207630       | 712.423967     | 356.715622       | 6  |
| 8  | 873.475018        | 437.241147        | 855.464453     | 428.235865       | I    | <b>617.350468</b>  | 309.178872      | 600.323919        | 300.665597       | 599.339903     | 300.173589       | 5  |
| 9  | 1002.517611       | <b>501.762444</b> | 984.507046     | 492.757161       | E    | <b>504.266404</b>  | 252.636840      | <b>487.239855</b> | 244.123565       | 486.255839     | 243.631557       | 4  |
| 10 | 1117.544554       | 559.275915        | 1099.533989    | 550.270633       | D    | <b>375.223811</b>  | 188.115543      | 358.197262        | 179.602269       | 357.213246     | 179.110261       | 3  |
| 11 | 1230.628618       | 615.817947        | 1212.618053    | 606.812664       | I    | <b>260.196868</b>  | 130.602072      | 243.170319        | 122.088797       |                |                  | 2  |
| 12 |                   |                   |                |                  | K    | 147.112804         | 74.060040       | 130.086255        | 65.546765        |                |                  | 1  |

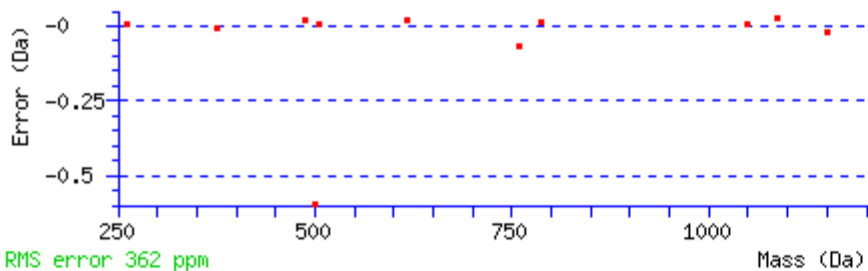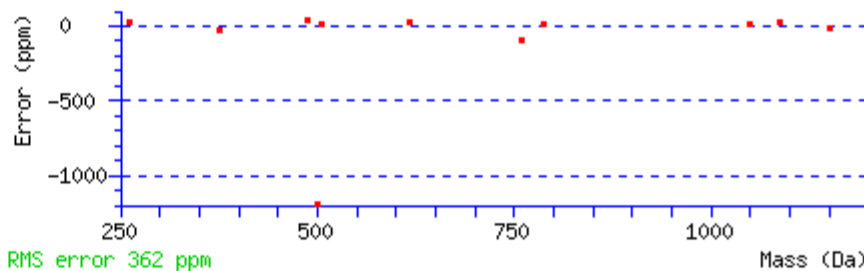

NCBI BLAST search of [ILTMDGLIEDIK](#)

(Parameters: blastp, nr protein database, expect=20000, no filter, PAM30)

Other BLAST [web gateways](#)

## All matches to this query

| Score | Mr(calc):   | Delta     | Sequence                      |
|-------|-------------|-----------|-------------------------------|
| 48.5  | 1375.726852 | -0.000284 | <a href="#">ILTMDGLIEDIK</a>  |
| 1.5   | 1375.720779 | 0.005789  | <a href="#">FRLQQAEEISIR</a>  |
| 0.5   | 1375.719482 | 0.007086  | <a href="#">SVSPSKTLSVPDK</a> |
| 0.2   | 1375.736053 | -0.009485 | <a href="#">AAPILRSFSWGR</a>  |
| 0.0   | 1375.713593 | 0.012975  | <a href="#">NWNTPIIFDLK</a>   |
| 0.0   | 1375.720322 | 0.006246  | <a href="#">IKNPMDMGTIK</a>   |

# MASCOT SEARCH RESULTS

## Peptide View

MS/MS Fragmentation of **ALLAEGVILR**

Found in **RT23\_HUMAN**, 28S ribosomal protein S23, mitochondrial OS=Homo sapiens GN=MRPS23 PE=1 SV=2

Match to Query 19692: 1053.651688 from(527.833120,2+) rtinseconds(2855) index(37514)

Title: Locus:1.1.1.2377.15

Data file 2011-11-12 - TFD - EP 6-5.mgf

Click mouse within plot area to zoom in by factor of two about that point

Or, Plot from  to  Da

Label all possible matches  Label matches used for scoring

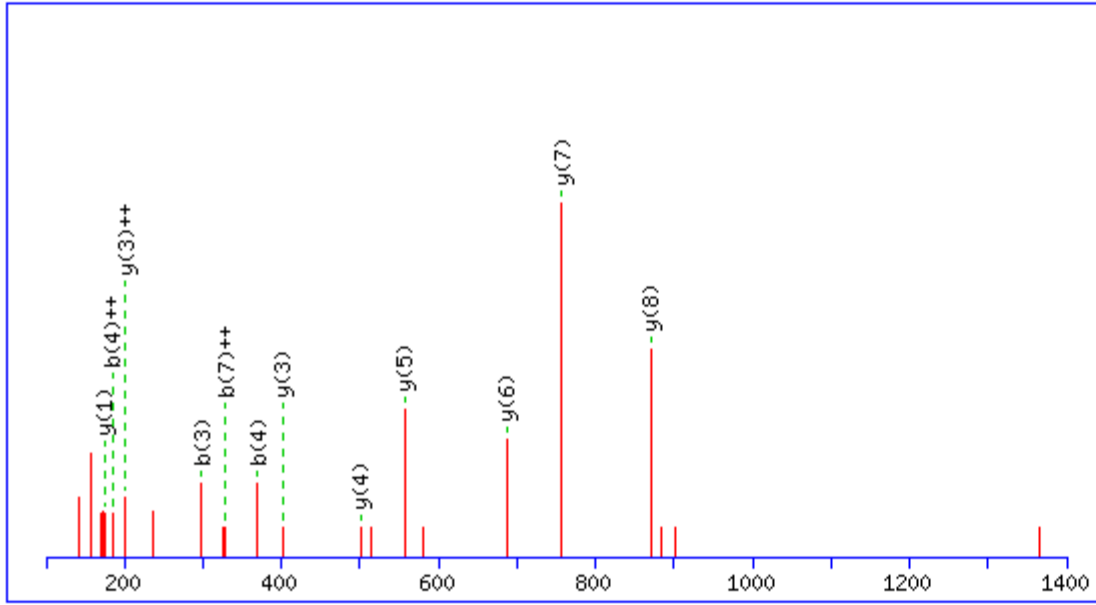

Monoisotopic mass of neutral peptide Mr(calc): 1053.654602

Fixed modifications: Propionamide (C) (apply to specified residues or termini only)

Ions Score: 48 Expect: 2.8e-005

Matches : 13/72 fragment ions using 22 most intense peaks ([help](#))

| #  | b                 | b <sup>++</sup>   | b <sup>0</sup> | b <sup>0++</sup> | Seq. | y                 | y <sup>++</sup>   | y <sup>*</sup> | y <sup>++</sup> | y <sup>0</sup> | y <sup>0++</sup> | #  |
|----|-------------------|-------------------|----------------|------------------|------|-------------------|-------------------|----------------|-----------------|----------------|------------------|----|
| 1  | 72.044390         | 36.525833         |                |                  | A    |                   |                   |                |                 |                |                  | 10 |
| 2  | <b>185.128454</b> | 93.067865         |                |                  | L    | 983.624793        | 492.316035        | 966.598244     | 483.802760      | 965.614228     | 483.310752       | 9  |
| 3  | <b>298.212518</b> | 149.609897        |                |                  | L    | <b>870.540729</b> | 435.774003        | 853.514180     | 427.260728      | 852.530164     | 426.768720       | 8  |
| 4  | <b>369.249632</b> | <b>185.128454</b> |                |                  | A    | <b>757.456665</b> | 379.231971        | 740.430116     | 370.718696      | 739.446100     | 370.226688       | 7  |
| 5  | 498.292225        | 249.649750        | 480.281660     | 240.644468       | E    | <b>686.419551</b> | 343.713414        | 669.393002     | 335.200139      | 668.408986     | 334.708131       | 6  |
| 6  | 555.313689        | 278.160483        | 537.303124     | 269.155200       | G    | <b>557.376958</b> | 279.192117        | 540.350409     | 270.678843      |                |                  | 5  |
| 7  | 654.382103        | <b>327.694690</b> | 636.371538     | 318.689407       | V    | <b>500.355494</b> | 250.681385        | 483.328945     | 242.168111      |                |                  | 4  |
| 8  | 767.466167        | 384.236722        | 749.455602     | 375.231439       | I    | <b>401.287080</b> | <b>201.147178</b> | 384.260531     | 192.633904      |                |                  | 3  |
| 9  | 880.550231        | 440.778754        | 862.539666     | 431.773471       | L    | 288.203016        | 144.605146        | 271.176467     | 136.091872      |                |                  | 2  |
| 10 |                   |                   |                |                  | R    | <b>175.118952</b> | 88.063114         | 158.092403     | 79.549840       |                |                  | 1  |

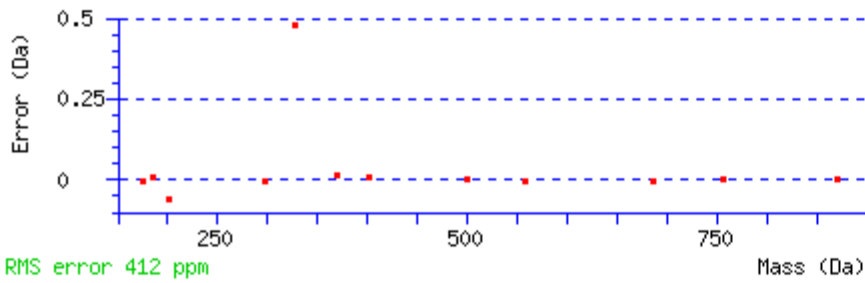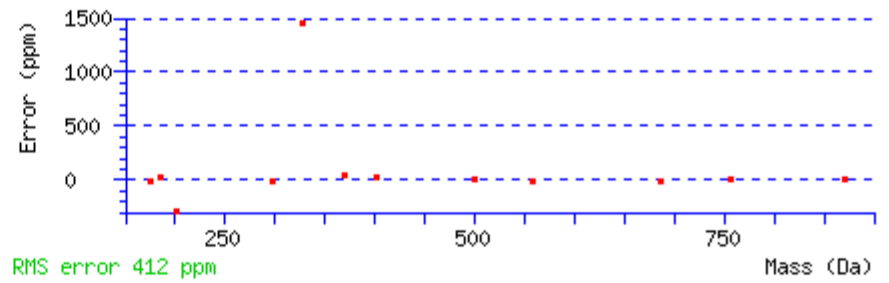

NCBI BLAST search of [ALLAEGVILR](#)

(Parameters: blastp, nr protein database, expect=20000, no filter, PAM30)

Other BLAST [web gateways](#)

## All matches to this query

| Score | Mr(calc):   | Delta     | Sequence                   |
|-------|-------------|-----------|----------------------------|
| 47.5  | 1053.654602 | -0.002914 | <a href="#">ALLAEGVILR</a> |
| 5.6   | 1053.655945 | -0.004257 | <a href="#">RFPRPLL</a>    |
| 0.4   | 1053.654602 | -0.002914 | <a href="#">LLALGLVAER</a> |

Mascot: <http://www.matrixscience.com/>

# MASCOT SCIENCE Mascot Search Results

## Peptide View

MS/MS Fragmentation of **TVEDVFLR**

Found in **RT24\_HUMAN**, 28S ribosomal protein S24, mitochondrial OS=Homo sapiens GN=MRPS24 PE=1 SV=1

Match to Query 14249: 977.524548 from(489.769550,2+) rtinseconds(2570) index(27349)

Title: Locus:1.1.1.2311.12

Data file 2011-11-12 - TFD - EP 6-7.mgf

Click mouse within plot area to zoom in by factor of two about that point

Or, Plot from  to  Da

Label all possible matches  Label matches used for scoring

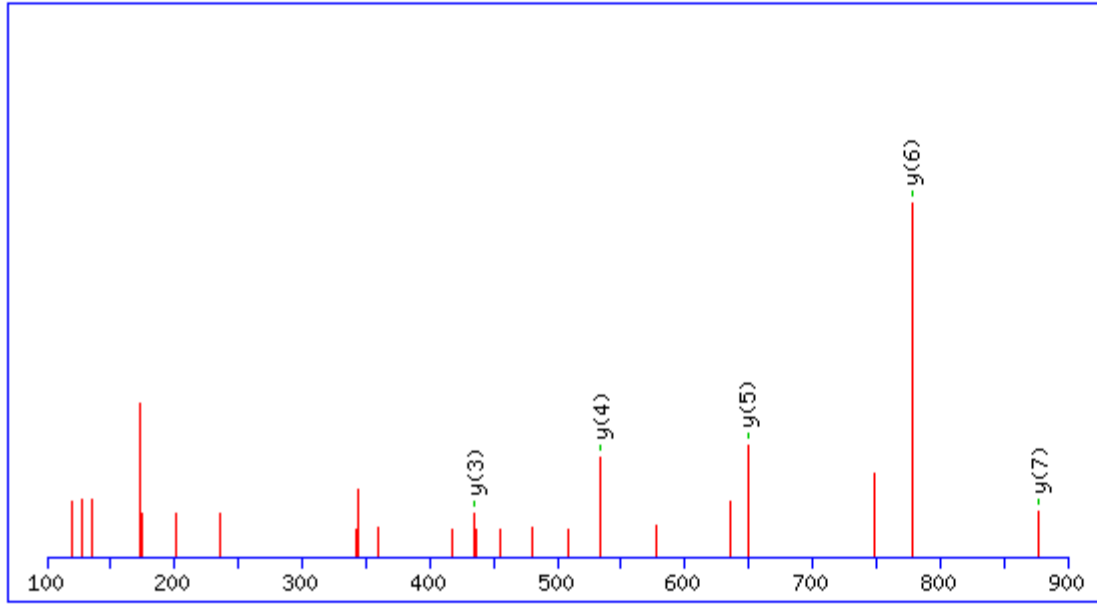

Monoisotopic mass of neutral peptide Mr(calc): 977.518204

Fixed modifications: Propionamide (C) (apply to specified residues or termini only)

Ions Score: 38 Expect: 0.0022

Matches : 5/62 fragment ions using 8 most intense peaks ([help](#))

| # | b          | b <sup>++</sup> | b <sup>0</sup> | b <sup>0++</sup> | Seq. | y          | y <sup>++</sup> | y <sup>*</sup> | y <sup>*++</sup> | y <sup>0</sup> | y <sup>0++</sup> | # |
|---|------------|-----------------|----------------|------------------|------|------------|-----------------|----------------|------------------|----------------|------------------|---|
| 1 | 102.054955 | 51.531116       | 84.044390      | 42.525833        | T    |            |                 |                |                  |                |                  | 8 |
| 2 | 201.123369 | 101.065322      | 183.112804     | 92.060040        | V    | 877.477794 | 439.242535      | 860.451245     | 430.729261       | 859.467229     | 430.237253       | 7 |
| 3 | 330.165962 | 165.586619      | 312.155397     | 156.581336       | E    | 778.409380 | 389.708328      | 761.382831     | 381.195054       | 760.398815     | 380.703046       | 6 |
| 4 | 445.192905 | 223.100090      | 427.182340     | 214.094808       | D    | 649.366787 | 325.187032      | 632.340238     | 316.673757       | 631.356222     | 316.181749       | 5 |
| 5 | 544.261319 | 272.634298      | 526.250754     | 263.629015       | V    | 534.339844 | 267.673560      | 517.313295     | 259.160286       |                |                  | 4 |
| 6 | 691.329733 | 346.168505      | 673.319168     | 337.163222       | F    | 435.271430 | 218.139353      | 418.244881     | 209.626079       |                |                  | 3 |
| 7 | 804.413797 | 402.710537      | 786.403232     | 393.705254       | L    | 288.203016 | 144.605146      | 271.176467     | 136.091872       |                |                  | 2 |
| 8 |            |                 |                |                  | R    | 175.118952 | 88.063114       | 158.092403     | 79.549840        |                |                  | 1 |

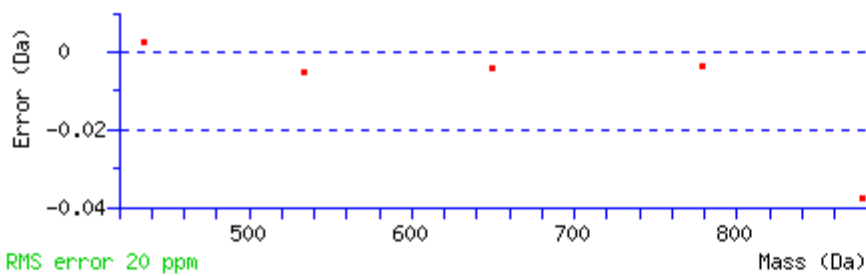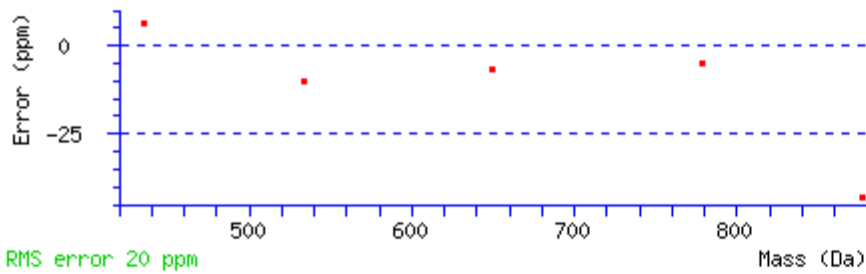

NCBI BLAST search of [TVEDVFLR](#)

(Parameters: blastp, nr protein database, expect=20000, no filter, PAM30)

Other BLAST [web gateways](#)

## All matches to this query

| Score | Mr(calc):  | Delta     | Sequence                   |
|-------|------------|-----------|----------------------------|
| 37.5  | 977.518204 | 0.006344  | <a href="#">TVEDVFLR</a>   |
| 9.5   | 977.521576 | 0.002972  | <a href="#">VMLTTAGGTK</a> |
| 5.1   | 977.533463 | -0.008915 | <a href="#">SLPVFPFR</a>   |
| 1.1   | 977.529434 | -0.004886 | <a href="#">TVRSFPGSK</a>  |
| 1.1   | 977.518158 | 0.006390  | <a href="#">SLEPYNKK</a>   |

# MASCOT Search Results

## Peptide View

MS/MS Fragmentation of **LLDLELTSR**

Found in **RT28\_HUMAN**, 28S ribosomal protein S28, mitochondrial OS=Homo sapiens GN=MRPS28 PE=1 SV=1

Match to Query 20975: 1058.603168 from(530.308860,2+) rtinseconds(2785) index(33934)

Title: Locus:1.1.1.2334.13

Data file 2011-11-14 - TFD - EP 8-6.mgf

Click mouse within plot area to zoom in by factor of two about that point

Or, Plot from  to  Da

Label all possible matches  Label matches used for scoring

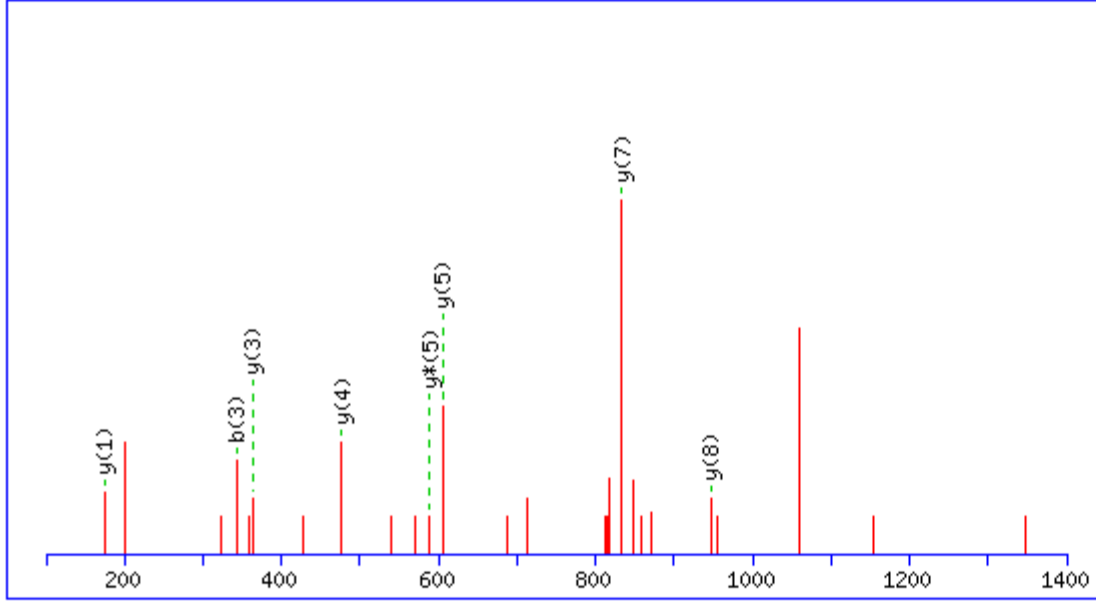

Monoisotopic mass of neutral peptide  $M_r(\text{calc})$ : 1058.597153

Fixed modifications: Propionamide (C) (apply to specified residues or termini only)

Ions Score: 38 Expect: 0.0013

Matches : 8/74 fragment ions using 15 most intense peaks ([help](#))

| # | b                 | b <sup>++</sup> | b <sup>0</sup> | b <sup>0++</sup> | Seq. | y                 | y <sup>++</sup> | y <sup>*</sup>    | y <sup>+++</sup> | y <sup>0</sup> | y <sup>0++</sup> | # |
|---|-------------------|-----------------|----------------|------------------|------|-------------------|-----------------|-------------------|------------------|----------------|------------------|---|
| 1 | 114.091340        | 57.549308       |                |                  | L    |                   |                 |                   |                  |                |                  | 9 |
| 2 | 227.175404        | 114.091340      |                |                  | L    | <b>946.520387</b> | 473.763832      | 929.493838        | 465.250557       | 928.509822     | 464.758549       | 8 |
| 3 | <b>342.202347</b> | 171.604811      | 324.191782     | 162.599529       | D    | <b>833.436323</b> | 417.221800      | 816.409774        | 408.708525       | 815.425758     | 408.216517       | 7 |
| 4 | 455.286411        | 228.146843      | 437.275846     | 219.141561       | L    | 718.409380        | 359.708328      | 701.382831        | 351.195054       | 700.398815     | 350.703046       | 6 |
| 5 | 584.329004        | 292.668140      | 566.318439     | 283.662858       | E    | <b>605.325316</b> | 303.166296      | <b>588.298767</b> | 294.653022       | 587.314751     | 294.161014       | 5 |
| 6 | 697.413068        | 349.210172      | 679.402503     | 340.204890       | L    | <b>476.282723</b> | 238.645000      | 459.256174        | 230.131725       | 458.272158     | 229.639717       | 4 |
| 7 | 798.460747        | 399.734012      | 780.450182     | 390.728729       | T    | <b>363.198659</b> | 182.102968      | 346.172110        | 173.589693       | 345.188094     | 173.097685       | 3 |
| 8 | 885.492775        | 443.250026      | 867.482210     | 434.244743       | S    | 262.150980        | 131.579128      | 245.124431        | 123.065854       | 244.140415     | 122.573846       | 2 |
| 9 |                   |                 |                |                  | R    | <b>175.118952</b> | 88.063114       | 158.092403        | 79.549840        |                |                  | 1 |

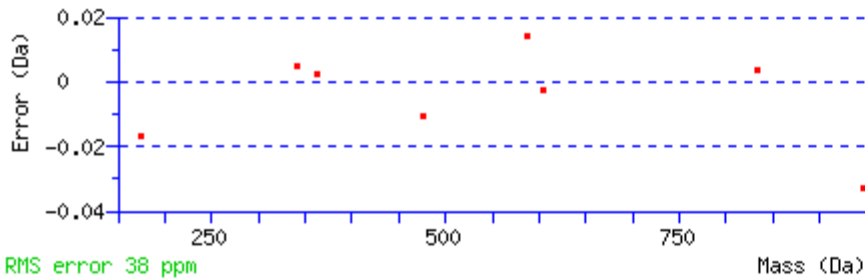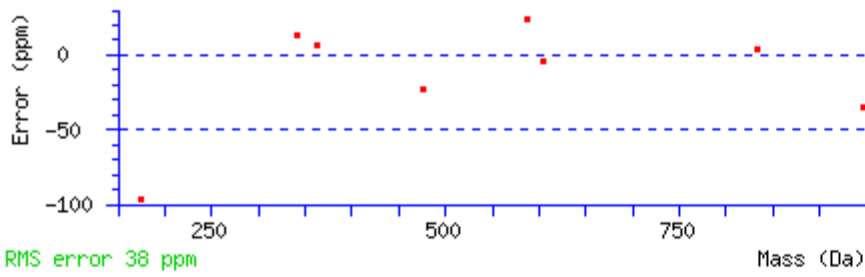

NCBI BLAST search of [LLDLELTSR](#)

(Parameters: blastp, nr protein database, expect=20000, no filter, PAM30)

Other BLAST [web gateways](#)

## All matches to this query

| Score | $M_r(\text{calc})$ : | Delta     | Sequence                   |
|-------|----------------------|-----------|----------------------------|
| 37.7  | 1058.597153          | 0.006015  | <a href="#">LLDLELTSR</a>  |
| 10.3  | 1058.605881          | -0.002713 | <a href="#">ILKVNMR</a>    |
| 8.8   | 1058.608398          | -0.005230 | <a href="#">TAAQVLLSTR</a> |
| 5.1   | 1058.597137          | 0.006031  | <a href="#">IEVLKSENK</a>  |
| 2.6   | 1058.601852          | 0.001316  | <a href="#">LRALLGCSR</a>  |
| 2.1   | 1058.597137          | 0.006031  | <a href="#">LLISLSEER</a>  |
| 1.8   | 1058.609726          | -0.006558 | <a href="#">IIHDRHLR</a>   |
| 1.7   | 1058.608383          | -0.005215 | <a href="#">LLASTRPASK</a> |
| 1.4   | 1058.608383          | -0.005215 | <a href="#">LLNIRTSK</a>   |
| 0.7   | 1058.608383          | -0.005215 | <a href="#">LIRDTNSIK</a>  |

# MASCOT Search Results

## Peptide View

MS/MS Fragmentation of **DNPKPNVSEALR**

Found in **RT36\_HUMAN**, 28S ribosomal protein S36, mitochondrial OS=Homo sapiens GN=MRPS36 PE=1 SV=2

Match to Query 34473: 1338.689022 from(447.236950,3+) rtinseconds(1582) index(7661)

Title: Locus:1.1.1.2059.6

Data file 2011-11-10 - TFD - EP 4-7.mgf

Click mouse within plot area to zoom in by factor of two about that point

Or, Plot from  to  Da

Label all possible matches  Label matches used for scoring

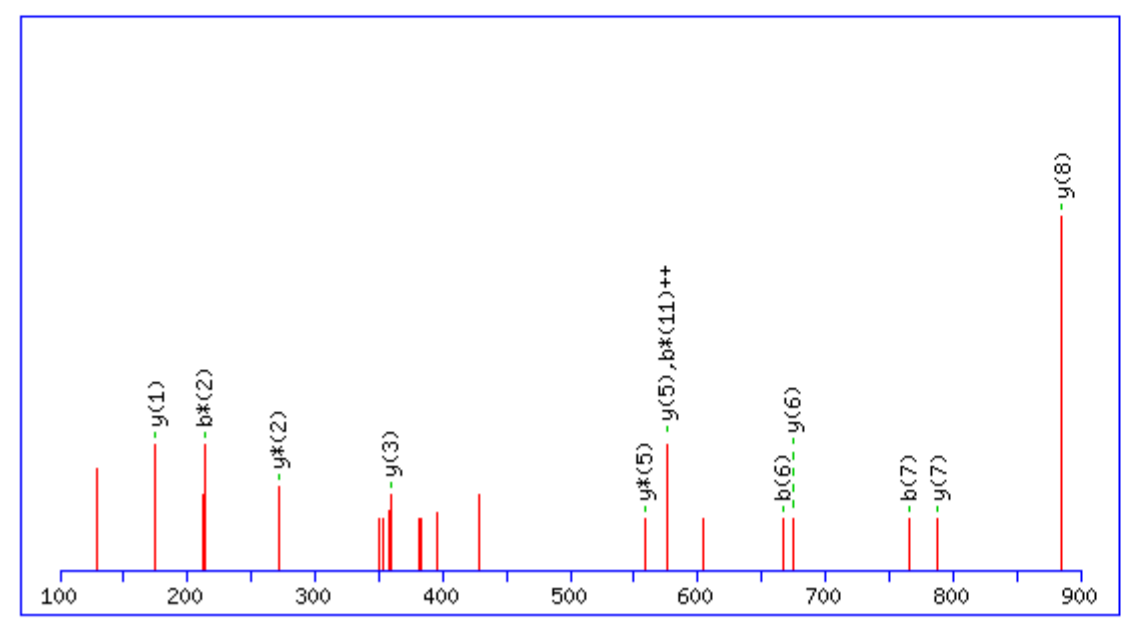

Monoisotopic mass of neutral peptide Mr(calc): 1338.689148

Fixed modifications: Propionamide (C) (apply to specified residues or termini only)

Ions Score: 51 Expect: 8.2e-005

Matches : 12/124 fragment ions using 13 most intense peaks [\(help\)](#)

| #  | b           | b <sup>++</sup> | b <sup>*</sup> | b <sup>*++</sup> | b <sup>0</sup> | b <sup>0++</sup> | Seq. | y           | y <sup>++</sup> | y <sup>*</sup> | y <sup>*++</sup> | y <sup>0</sup> | y <sup>0++</sup> | #  |
|----|-------------|-----------------|----------------|------------------|----------------|------------------|------|-------------|-----------------|----------------|------------------|----------------|------------------|----|
| 1  | 116.034219  | 58.520748       |                |                  | 98.023654      | 49.515465        | D    |             |                 |                |                  |                |                  | 12 |
| 2  | 230.077146  | 115.542211      | 213.050597     | 107.028937       | 212.066581     | 106.536928       | N    | 1224.669510 | 612.838393      | 1207.642961    | 604.325118       | 1206.658945    | 603.833110       | 11 |
| 3  | 327.129910  | 164.068593      | 310.103361     | 155.555319       | 309.119345     | 155.063311       | P    | 1110.626583 | 555.816929      | 1093.600034    | 547.303655       | 1092.616018    | 546.811647       | 10 |
| 4  | 455.224873  | 228.116075      | 438.198324     | 219.602800       | 437.214308     | 219.110792       | K    | 1013.573819 | 507.290547      | 996.547270     | 498.777273       | 995.563254     | 498.285265       | 9  |
| 5  | 552.277637  | 276.642457      | 535.251088     | 268.129182       | 534.267072     | 267.637174       | P    | 885.478856  | 443.243066      | 868.452307     | 434.729791       | 867.468291     | 434.237783       | 8  |
| 6  | 666.320564  | 333.663920      | 649.294015     | 325.150646       | 648.309999     | 324.658638       | N    | 788.426092  | 394.716684      | 771.399543     | 386.203409       | 770.415527     | 385.711401       | 7  |
| 7  | 765.388978  | 383.198127      | 748.362429     | 374.684852       | 747.378413     | 374.192844       | V    | 674.383165  | 337.695220      | 657.356616     | 329.181946       | 656.372600     | 328.689938       | 6  |
| 8  | 852.421006  | 426.714141      | 835.394457     | 418.200866       | 834.410441     | 417.708858       | S    | 575.314751  | 288.161013      | 558.288202     | 279.647739       | 557.304186     | 279.155731       | 5  |
| 9  | 981.463599  | 491.235437      | 964.437050     | 482.722163       | 963.453034     | 482.230155       | E    | 488.282723  | 244.644999      | 471.256174     | 236.131725       | 470.272158     | 235.639717       | 4  |
| 10 | 1052.500713 | 526.753994      | 1035.474164    | 518.240720       | 1034.490148    | 517.748712       | A    | 359.240130  | 180.123703      | 342.213581     | 171.610428       |                |                  | 3  |
| 11 | 1165.584777 | 583.296026      | 1148.558228    | 574.782752       | 1147.574212    | 574.290744       | L    | 288.203016  | 144.605146      | 271.176467     | 136.091871       |                |                  | 2  |
| 12 |             |                 |                |                  |                |                  | R    | 175.118952  | 88.063114       | 158.092403     | 79.549839        |                |                  | 1  |

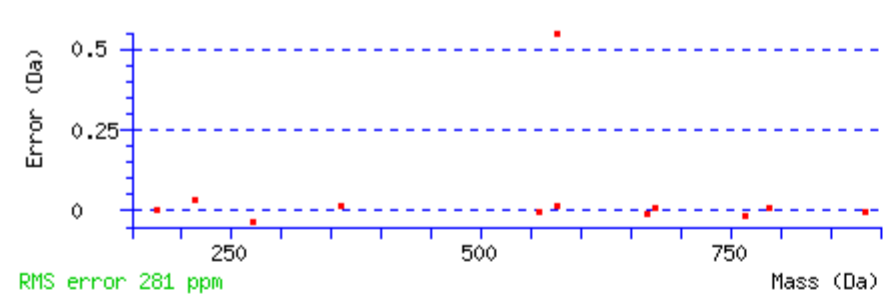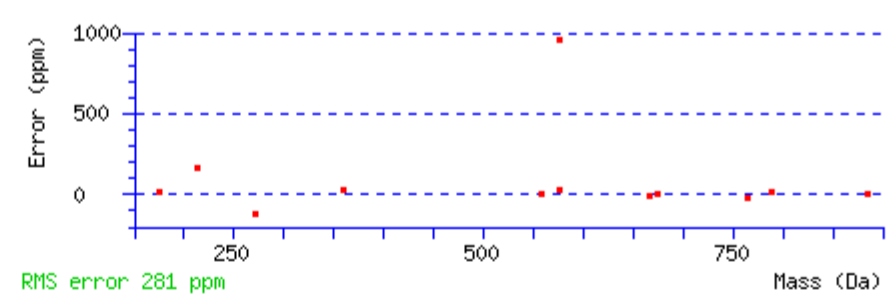

NCBI BLAST search of [DNPKPNVSEALR](#)

(Parameters: blastp, nr protein database, expect=20000, no filter, PAM30)

Other BLAST [web gateways](#)

## All matches to this query

| Score | Mr(calc):   | Delta     | Sequence                      |
|-------|-------------|-----------|-------------------------------|
| 50.9  | 1338.689148 | -0.000126 | <a href="#">DNPKPNVSEALR</a>  |
| 8.1   | 1338.700394 | -0.011372 | <a href="#">AKNLPQPQSGQR</a>  |
| 7.4   | 1338.700394 | -0.011372 | <a href="#">AKNLPQPQSGQR</a>  |
| 2.0   | 1338.700409 | -0.011387 | <a href="#">VLPGSNGKPNGQR</a> |
| 0.4   | 1338.693176 | -0.004154 | <a href="#">LVPEYIHAPER</a>   |
| 0.1   | 1338.700394 | -0.011372 | <a href="#">QDTIAHLERTR</a>   |

# MASCOT SCIENCE Mascot Search Results

## Peptide View

MS/MS Fragmentation of **AIAYLFPSGLFEK**

Found in **RT09\_HUMAN**, 28S ribosomal protein S9, mitochondrial OS=Homo sapiens GN=MRPS9 PE=1 SV=2

Match to Query 44783: 1454.773888 from(728.394220,2+) rtinseconds(3937) index(58511)

Title: Locus:1.1.1.2908.25

Data file 2011-11-12 - TFD - EP 5-4.mgf

Click mouse within plot area to zoom in by factor of two about that point

Or, Plot from  to  Da

Label all possible matches  Label matches used for scoring

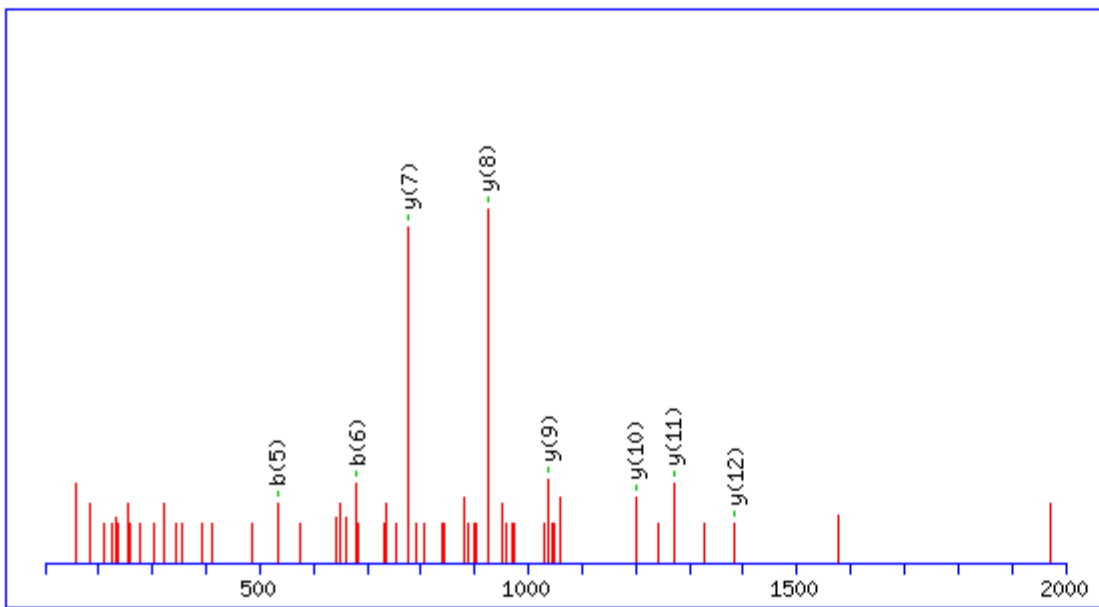

Monoisotopic mass of neutral peptide Mr(calc): 1454.780930

Fixed modifications: Propionamide (C) (apply to specified residues or termini only)

Ions Score: 38 Expect: 0.0018

Matches : 8/104 fragment ions using 13 most intense peaks [\(help\)](#)

| #  | b                 | b <sup>++</sup> | b <sup>0</sup> | b <sup>0++</sup> | Seq. | y                  | y <sup>++</sup> | y <sup>*</sup> | y <sup>*++</sup> | y <sup>0</sup> | y <sup>0++</sup> | #  |
|----|-------------------|-----------------|----------------|------------------|------|--------------------|-----------------|----------------|------------------|----------------|------------------|----|
| 1  | 72.044390         | 36.525833       |                |                  | A    |                    |                 |                |                  |                |                  | 13 |
| 2  | 185.128454        | 93.067865       |                |                  | I    | <b>1384.751116</b> | 692.879196      | 1367.724567    | 684.365922       | 1366.740551    | 683.873914       | 12 |
| 3  | 256.165568        | 128.586422      |                |                  | A    | <b>1271.667052</b> | 636.337164      | 1254.640503    | 627.823890       | 1253.656487    | 627.331882       | 11 |
| 4  | 419.228897        | 210.118087      |                |                  | Y    | <b>1200.629938</b> | 600.818607      | 1183.603389    | 592.305333       | 1182.619373    | 591.813325       | 10 |
| 5  | <b>532.312961</b> | 266.660119      |                |                  | L    | <b>1037.566609</b> | 519.286943      | 1020.540060    | 510.773668       | 1019.556044    | 510.281660       | 9  |
| 6  | <b>679.381375</b> | 340.194326      |                |                  | F    | <b>924.482545</b>  | 462.744911      | 907.455996     | 454.231636       | 906.471980     | 453.739628       | 8  |
| 7  | 776.434139        | 388.720708      |                |                  | P    | <b>777.414131</b>  | 389.210704      | 760.387582     | 380.697429       | 759.403566     | 380.205421       | 7  |
| 8  | 863.466167        | 432.236722      | 845.455602     | 423.231439       | S    | 680.361367         | 340.684322      | 663.334818     | 332.171047       | 662.350802     | 331.679039       | 6  |
| 9  | 920.487631        | 460.747454      | 902.477066     | 451.742171       | G    | 593.329339         | 297.168308      | 576.302790     | 288.655033       | 575.318774     | 288.163025       | 5  |
| 10 | 1033.571695       | 517.289486      | 1015.561130    | 508.284203       | L    | 536.307875         | 268.657576      | 519.281326     | 260.144301       | 518.297310     | 259.652293       | 4  |
| 11 | 1180.640109       | 590.823693      | 1162.629544    | 581.818410       | F    | 423.223811         | 212.115544      | 406.197262     | 203.602269       | 405.213246     | 203.110261       | 3  |
| 12 | 1309.682702       | 655.344989      | 1291.672137    | 646.339707       | E    | 276.155397         | 138.581337      | 259.128848     | 130.068062       | 258.144832     | 129.576054       | 2  |
| 13 |                   |                 |                |                  | K    | 147.112804         | 74.060040       | 130.086255     | 65.546765        |                |                  | 1  |

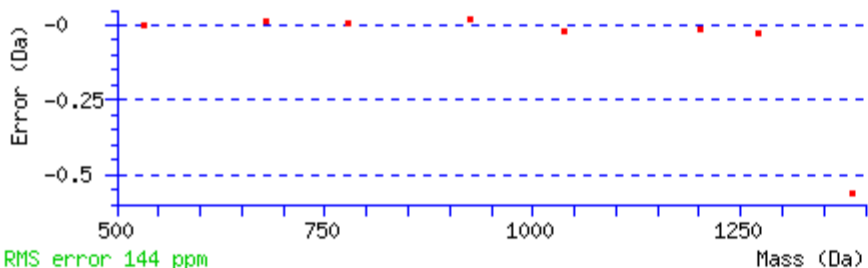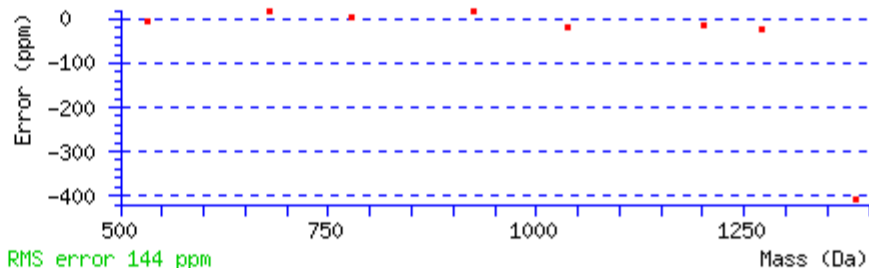

NCBI BLAST search of **AIAYLFPSGLFEK**

(Parameters: blastp, nr protein database, expect=20000, no filter, PAM30)

Other BLAST [web gateways](#)

## All matches to this query

| Score | Mr(calc):   | Delta     | Sequence                      |
|-------|-------------|-----------|-------------------------------|
| 38.0  | 1454.780930 | -0.007042 | <a href="#">AIAYLFPSGLFEK</a> |

Mascot: <http://www.matrixscience.com/>

# {MATRIX} SCIENCE Mascot Search Results

## Peptide View

MS/MS Fragmentation of **LGVSCEVIDLR**

Found in **ODDB\_HUMAN**, 2-oxoisovalerate dehydrogenase subunit beta, mitochondrial OS=Homo sapiens GN=BCKDHB PE=1 SV=2

Match to Query 34868: 1273.672388 from(637.843470,2+) rtinseconds(2746) index(37073)

Title: Locus:1.1.1.2341.33

Data file 2011-11-12 - TFD - EP 6-4.mgf

Click mouse within plot area to zoom in by factor of two about that point

Or, Plot from  to  Da

Label all possible matches  Label matches used for scoring

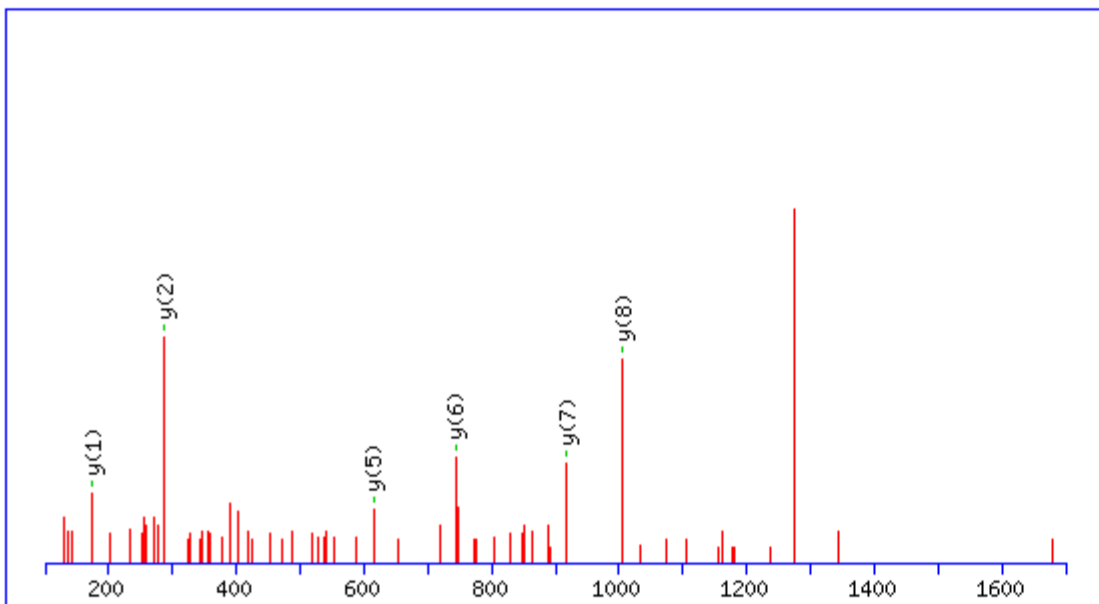

Monoisotopic mass of neutral peptide Mr(calc): 1273.670013

Fixed modifications: Propionamide (C) (apply to specified residues or termini only)

Ions Score: 36 Expect: 0.0035

Matches : 6/90 fragment ions using 12 most intense peaks [\(help\)](#)

| #  | b           | b <sup>++</sup> | b <sup>0</sup> | b <sup>0++</sup> | Seq. | y                  | y <sup>++</sup> | y <sup>*</sup> | y <sup>*++</sup> | y <sup>0</sup> | y <sup>0++</sup> | #  |
|----|-------------|-----------------|----------------|------------------|------|--------------------|-----------------|----------------|------------------|----------------|------------------|----|
| 1  | 114.091340  | 57.549308       |                |                  | L    |                    |                 |                |                  |                |                  | 11 |
| 2  | 171.112804  | 86.060040       |                |                  | G    | 1161.593235        | 581.300256      | 1144.566686    | 572.786981       | 1143.582670    | 572.294973       | 10 |
| 3  | 270.181218  | 135.594247      |                |                  | V    | 1104.571771        | 552.789523      | 1087.545222    | 544.276249       | 1086.561206    | 543.784241       | 9  |
| 4  | 357.213246  | 179.110261      | 339.202681     | 170.104978       | S    | <b>1005.503357</b> | 503.255316      | 988.476808     | 494.742042       | 987.492792     | 494.250034       | 8  |
| 5  | 531.259545  | 266.133411      | 513.248980     | 257.128128       | C    | <b>918.471329</b>  | 459.739303      | 901.444780     | 451.226028       | 900.460764     | 450.734020       | 7  |
| 6  | 660.302138  | 330.654707      | 642.291573     | 321.649425       | E    | <b>744.425030</b>  | 372.716153      | 727.398481     | 364.202879       | 726.414465     | 363.710871       | 6  |
| 7  | 759.370552  | 380.188914      | 741.359987     | 371.183631       | V    | <b>615.382437</b>  | 308.194857      | 598.355888     | 299.681582       | 597.371872     | 299.189574       | 5  |
| 8  | 872.454616  | 436.730946      | 854.444051     | 427.725664       | I    | 516.314023         | 258.660650      | 499.287474     | 250.147375       | 498.303458     | 249.655367       | 4  |
| 9  | 987.481559  | 494.244418      | 969.470994     | 485.239135       | D    | 403.229959         | 202.118617      | 386.203410     | 193.605343       | 385.219394     | 193.113335       | 3  |
| 10 | 1100.565623 | 550.786450      | 1082.555058    | 541.781167       | L    | <b>288.203016</b>  | 144.605146      | 271.176467     | 136.091871       |                |                  | 2  |
| 11 |             |                 |                |                  | R    | <b>175.118952</b>  | 88.063114       | 158.092403     | 79.549839        |                |                  | 1  |

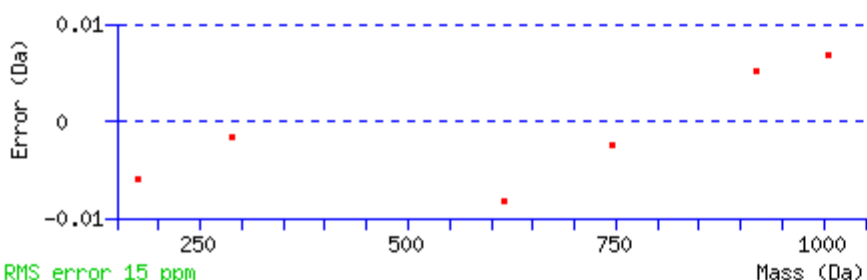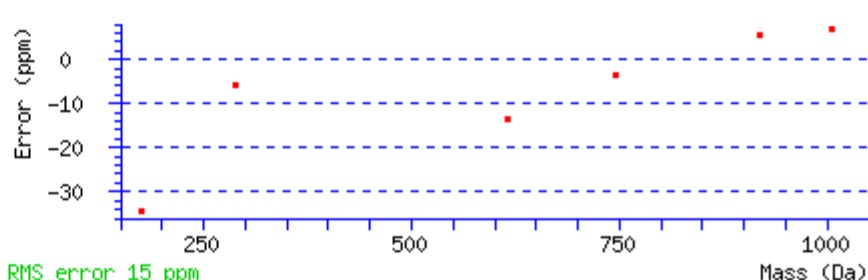

NCBI BLAST search of [LGVSCEVIDLR](#)

(Parameters: blastp, nr protein database, expect=20000, no filter, PAM30)

Other BLAST [web gateways](#)

## All matches to this query

| Score | Mr(calc):   | Delta     | Sequence                      |
|-------|-------------|-----------|-------------------------------|
| 36.0  | 1273.670013 | 0.002375  | <a href="#">LGVSCEVIDLR</a>   |
| 9.2   | 1273.662628 | 0.009760  | <a href="#">VVEGTAAQSSGLR</a> |
| 5.9   | 1273.670013 | 0.002375  | <a href="#">AASLSTMVPLPR</a>  |
| 5.1   | 1273.681900 | -0.009512 | <a href="#">VNWEIFTPLR</a>    |
| 2.6   | 1273.666641 | 0.005747  | <a href="#">QLLPGDEFSLR</a>   |
| 2.0   | 1273.681213 | -0.008825 | <a href="#">LRPESMEKLR</a>    |
| 2.0   | 1273.681213 | -0.008825 | <a href="#">LRPESMEKLR</a>    |
| 1.8   | 1273.681229 | -0.008841 | <a href="#">MSRGSIEIPLR</a>   |
| 1.2   | 1273.677872 | -0.005484 | <a href="#">RLFNLVPER</a>     |
| 1.1   | 1273.670013 | 0.002375  | <a href="#">AASLSTMVPLPR</a>  |

Mascot: <http://www.matrixscience.com/>



# MASCOT Search Results

## Peptide View

MS/MS Fragmentation of **NYIQGINLVQAK**

Found in **RM12\_HUMAN**, 39S ribosomal protein L12, mitochondrial OS=Homo sapiens GN=MRPL12 PE=1 SV=2

Match to Query 42397: 1359.747868 from(680.881210,2+) rtinseconds(2653) index(33038)

Title: Locus:1.1.1.2230.37

Data file 2011-11-12 - TFD - EP 5-6.mgf

Click mouse within plot area to zoom in by factor of two about that point

Or, Plot from  to  Da

Label all possible matches  Label matches used for scoring

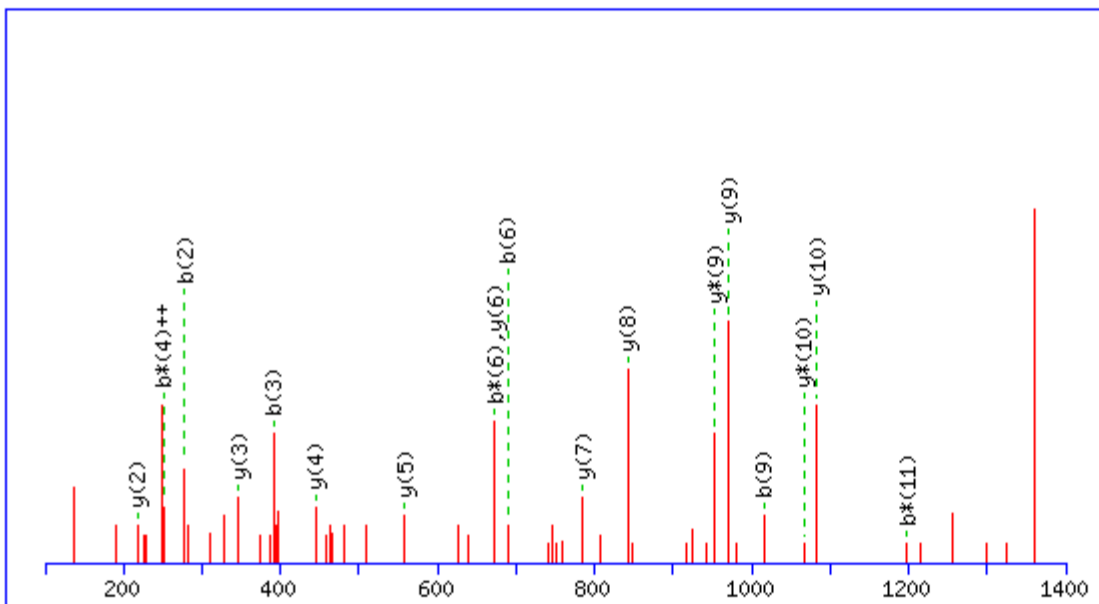

Monoisotopic mass of neutral peptide Mr(calc): 1359.751022

Fixed modifications: Propionamide (C) (apply to specified residues or termini only)

Ions Score: 57 Expect: 1.6e-005

Matches : 18/88 fragment ions using 33 most intense peaks ([help](#))

| #  | b                  | b <sup>++</sup> | b <sup>*</sup>     | b <sup>*++</sup>  | Seq. | y                  | y <sup>++</sup> | y <sup>*</sup>     | y <sup>*++</sup> | #  |
|----|--------------------|-----------------|--------------------|-------------------|------|--------------------|-----------------|--------------------|------------------|----|
| 1  | 115.050203         | 58.028740       | 98.023654          | 49.515465         | N    |                    |                 |                    |                  | 12 |
| 2  | <b>278.113532</b>  | 139.560404      | 261.086983         | 131.047130        | Y    | 1246.715400        | 623.861338      | 1229.688851        | 615.348064       | 11 |
| 3  | <b>391.197596</b>  | 196.102436      | 374.171047         | 187.589162        | I    | <b>1083.652071</b> | 542.329674      | <b>1066.625522</b> | 533.816399       | 10 |
| 4  | 519.256174         | 260.131725      | 502.229625         | <b>251.618451</b> | Q    | <b>970.568007</b>  | 485.787642      | <b>953.541458</b>  | 477.274367       | 9  |
| 5  | 576.277638         | 288.642457      | 559.251089         | 280.129183        | G    | <b>842.509429</b>  | 421.758353      | 825.482880         | 413.245078       | 8  |
| 6  | <b>689.361702</b>  | 345.184489      | <b>672.335153</b>  | 336.671215        | I    | <b>785.487965</b>  | 393.247620      | 768.461416         | 384.734346       | 7  |
| 7  | 803.404629         | 402.205953      | 786.378080         | 393.692678        | N    | <b>672.403901</b>  | 336.705588      | 655.377352         | 328.192314       | 6  |
| 8  | 916.488693         | 458.747985      | 899.462144         | 450.234710        | L    | <b>558.360974</b>  | 279.684125      | 541.334425         | 271.170850       | 5  |
| 9  | <b>1015.557107</b> | 508.282192      | 998.530558         | 499.768917        | V    | <b>445.276910</b>  | 223.142093      | 428.250361         | 214.628818       | 4  |
| 10 | 1143.615685        | 572.311481      | 1126.589136        | 563.798206        | Q    | <b>346.208496</b>  | 173.607886      | 329.181947         | 165.094611       | 3  |
| 11 | 1214.652799        | 607.830038      | <b>1197.626250</b> | 599.316763        | A    | <b>218.149918</b>  | 109.578597      | 201.123369         | 101.065322       | 2  |
| 12 |                    |                 |                    |                   | K    | 147.112804         | 74.060040       | 130.086255         | 65.546765        | 1  |

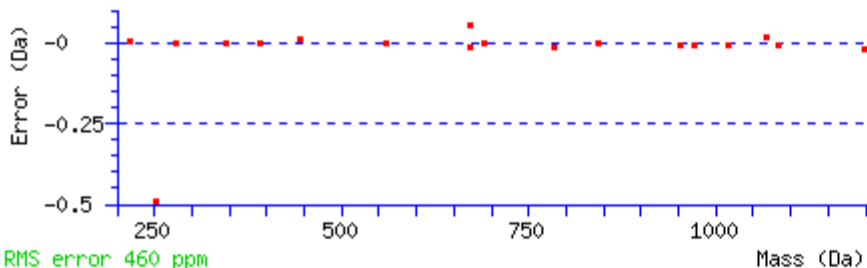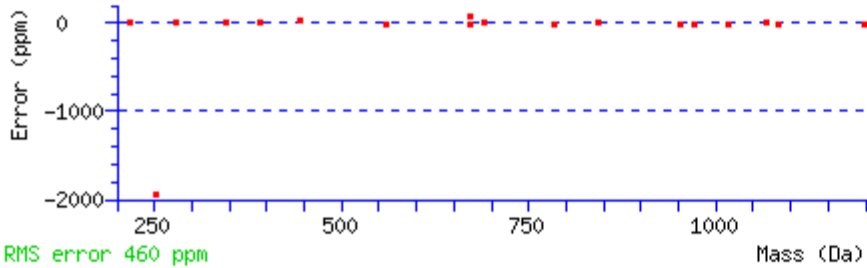

NCBI BLAST search of [NYIQGINLVQAK](#)

(Parameters: blastp, nr protein database, expect=20000, no filter, PAM30)

Other BLAST [web gateways](#)

All matches to this query

| Score | Mr(calc):   | Delta     | Sequence                     |
|-------|-------------|-----------|------------------------------|
| 57.5  | 1359.751022 | -0.003154 | <a href="#">NYIQGINLVQAK</a> |
| 10.8  | 1359.755066 | -0.007198 | <a href="#">FPGVAIYLVEPR</a> |

# MASCOT Search Results

## Peptide View

MS/MS Fragmentation of **LAIYGMLPK**

Found in **RM13\_HUMAN**, 39S ribosomal protein L13, mitochondrial OS=Homo sapiens GN=MRPL13 PE=1 SV=1

Match to Query 18268: 1020.562688 from(511.288620,2+) rtinseconds(2443) index(27880)

Title: Locus:1.1.1.2203.19

Data file 2011-11-14 - TFD - EP 8-6.mgf

Click mouse within plot area to zoom in by factor of two about that point

Or, Plot from  to  Da

Label all possible matches  Label matches used for scoring

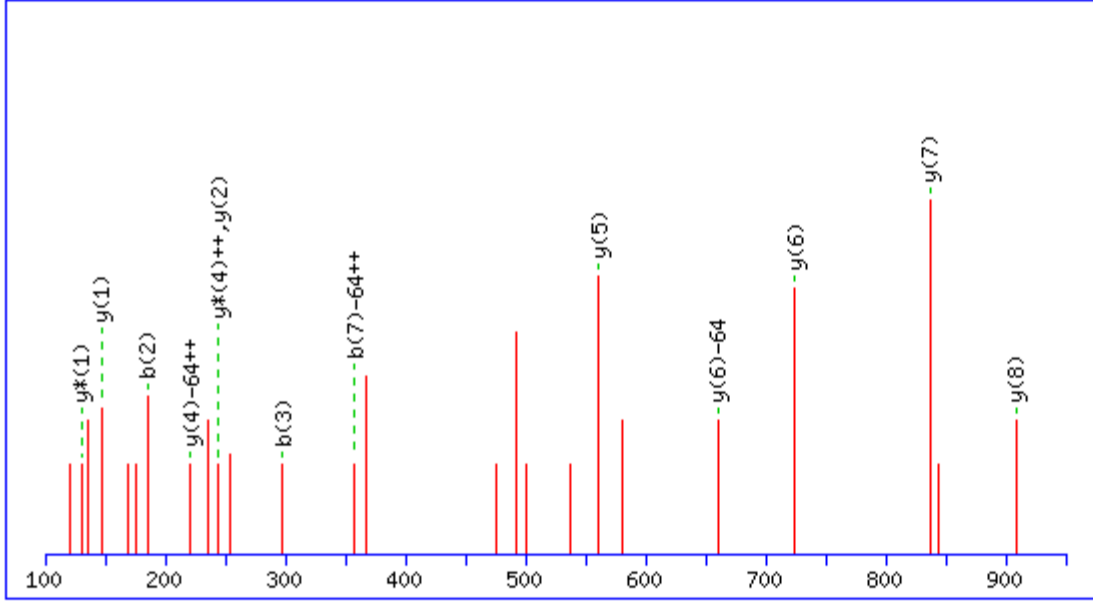

Monoisotopic mass of neutral peptide Mr(calc): 1020.567764

Fixed modifications: Propionamide (C) (apply to specified residues or termini only)

Variable modifications:

M6 : Oxidation (M), with neutral losses 0.000000 (shown in table), 63.998285

Ions Score: 39 Expect: 0.0028

Matches : 13/74 fragment ions using 23 most intense peaks ([help](#))

| # | b                 | b <sup>++</sup> | Seq. | y                 | y <sup>++</sup> | y <sup>*</sup>    | y <sup>*++</sup>  | # |
|---|-------------------|-----------------|------|-------------------|-----------------|-------------------|-------------------|---|
| 1 | 114.091340        | 57.549308       | L    |                   |                 |                   |                   | 9 |
| 2 | <b>185.128454</b> | 93.067865       | A    | <b>908.491003</b> | 454.749140      | 891.464454        | 446.235865        | 8 |
| 3 | <b>298.212518</b> | 149.609897      | I    | <b>837.453889</b> | 419.230583      | 820.427340        | 410.717308        | 7 |
| 4 | 461.275847        | 231.141561      | Y    | <b>724.369825</b> | 362.688551      | 707.343276        | 354.175276        | 6 |
| 5 | 518.297311        | 259.652294      | G    | <b>561.306496</b> | 281.156886      | 544.279947        | 272.643612        | 5 |
| 6 | 665.332711        | 333.169994      | M    | 504.285032        | 252.646154      | 487.258483        | <b>244.132880</b> | 4 |
| 7 | 778.416775        | 389.712026      | L    | 357.249632        | 179.128454      | 340.223083        | 170.615180        | 3 |
| 8 | 875.469539        | 438.238408      | P    | <b>244.165568</b> | 122.586422      | 227.139019        | 114.073148        | 2 |
| 9 |                   |                 | K    | <b>147.112804</b> | 74.060040       | <b>130.086255</b> | 65.546765         | 1 |

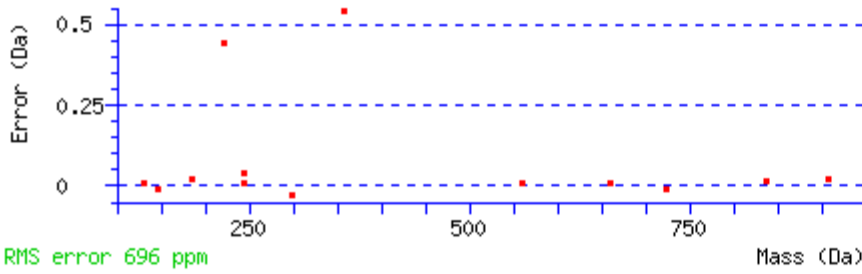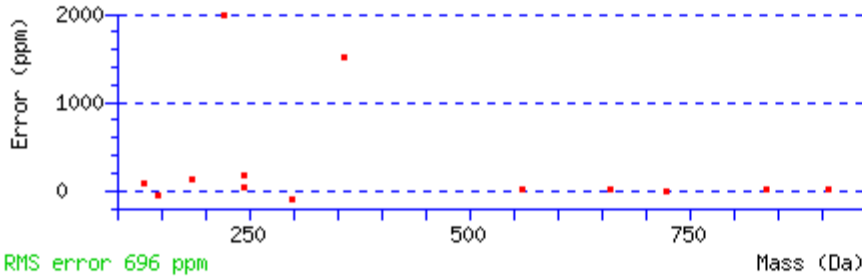

NCBI BLAST search of [LAIYGMLPK](#)

(Parameters: blastp, nr protein database, expect=20000, no filter, PAM30)

Other BLAST [web gateways](#)

All matches to this query

| Score | Mr(calc):   | Delta     | Sequence                   |
|-------|-------------|-----------|----------------------------|
| 38.8  | 1020.567764 | -0.005076 | <a href="#">LAIYGMLPK</a>  |
| 24.1  | 1020.567764 | -0.005076 | <a href="#">LAIYGMLPK</a>  |
| 16.0  | 1020.567780 | -0.005092 | <a href="#">LAPIMFGIK</a>  |
| 6.0   | 1020.560379 | 0.002309  | <a href="#">ALLTAETFR</a>  |
| 4.4   | 1020.560394 | 0.002294  | <a href="#">LSPPLPPR</a>   |
| 4.1   | 1020.560394 | 0.002294  | <a href="#">LSPPLPPR</a>   |
| 3.5   | 1020.560394 | 0.002294  | <a href="#">LSPPLPPR</a>   |
| 2.1   | 1020.557693 | 0.004995  | <a href="#">RNVDHRPK</a>   |
| 1.5   | 1020.571609 | -0.008921 | <a href="#">LAHPVASAQK</a> |
| 0.8   | 1020.560364 | 0.002324  | <a href="#">LEFAKANTK</a>  |

# MASCOT Search Results

## Peptide View

MS/MS Fragmentation of **NLELLSVAR**

Found in **RM18\_HUMAN**, 39S ribosomal protein L18, mitochondrial OS=Homo sapiens GN=MRPL18 PE=1 SV=1

Match to Query 19698: 1013.584688 from(507.799620,2+) rtinseconds(2729) index(34463)

Title: Locus:1.1.1.2259.12

Data file 2011-11-12 - TFD - EP 5-6.mgf

Click mouse within plot area to zoom in by factor of two about that point

Or, Plot from  to  Da

Label all possible matches  Label matches used for scoring

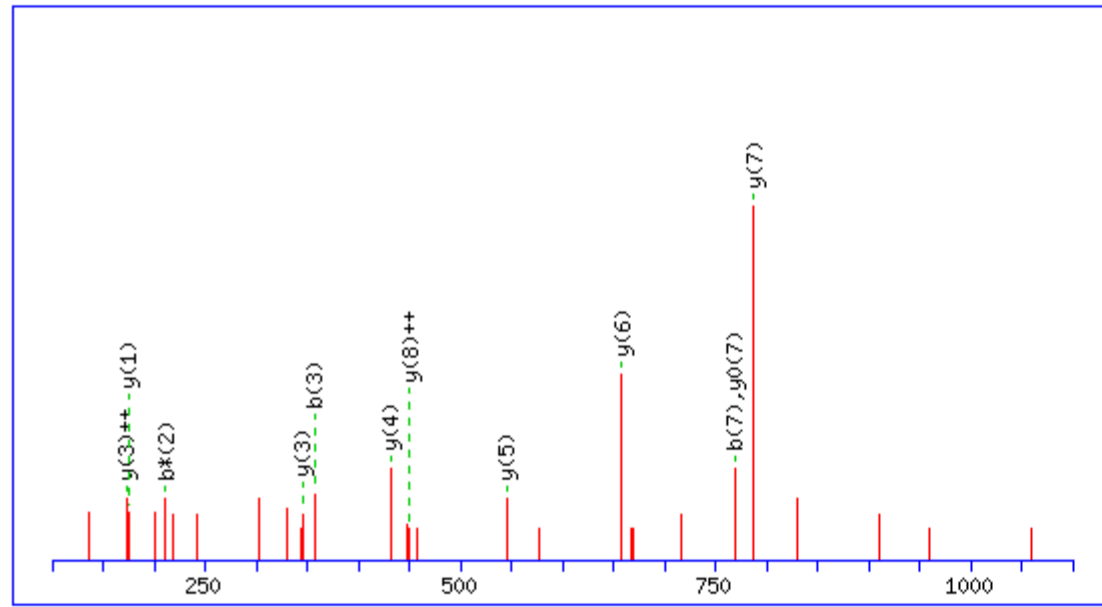

Monoisotopic mass of neutral peptide Mr(calc): 1013.586914

Fixed modifications: Propionamide (C) (apply to specified residues or termini only)

Ions Score: 36 Expect: 0.003

Matches : 12/86 fragment ions using 22 most intense peaks [\(help\)](#)

| # | b          | b <sup>++</sup> | b <sup>*</sup> | b <sup>*++</sup> | b <sup>0</sup> | b <sup>0++</sup> | Seq. | y          | y <sup>++</sup> | y <sup>*</sup> | y <sup>*++</sup> | y <sup>0</sup> | y <sup>0++</sup> | # |
|---|------------|-----------------|----------------|------------------|----------------|------------------|------|------------|-----------------|----------------|------------------|----------------|------------------|---|
| 1 | 115.050203 | 58.028740       | 98.023654      | 49.515465        |                |                  | N    |            |                 |                |                  |                |                  | 9 |
| 2 | 228.134267 | 114.570771      | 211.107718     | 106.057497       |                |                  | L    | 900.551293 | 450.779285      | 883.524744     | 442.266010       | 882.540728     | 441.774002       | 8 |
| 3 | 357.176860 | 179.092068      | 340.150311     | 170.578793       | 339.166295     | 170.086785       | E    | 787.467229 | 394.237253      | 770.440680     | 385.723978       | 769.456664     | 385.231970       | 7 |
| 4 | 470.260924 | 235.634100      | 453.234375     | 227.120826       | 452.250359     | 226.628818       | L    | 658.424636 | 329.715956      | 641.398087     | 321.202681       | 640.414071     | 320.710673       | 6 |
| 5 | 583.344988 | 292.176132      | 566.318439     | 283.662858       | 565.334423     | 283.170850       | L    | 545.340572 | 273.173924      | 528.314023     | 264.660649       | 527.330007     | 264.168641       | 5 |
| 6 | 670.377016 | 335.692146      | 653.350467     | 327.178872       | 652.366451     | 326.686864       | S    | 432.256508 | 216.631892      | 415.229959     | 208.118617       | 414.245943     | 207.626609       | 4 |
| 7 | 769.445430 | 385.226353      | 752.418881     | 376.713078       | 751.434865     | 376.221071       | V    | 345.224480 | 173.115878      | 328.197931     | 164.602603       |                |                  | 3 |
| 8 | 840.482544 | 420.744910      | 823.455995     | 412.231635       | 822.471979     | 411.739627       | A    | 246.156066 | 123.581671      | 229.129517     | 115.068396       |                |                  | 2 |
| 9 |            |                 |                |                  |                |                  | R    | 175.118952 | 88.063114       | 158.092403     | 79.549839        |                |                  | 1 |

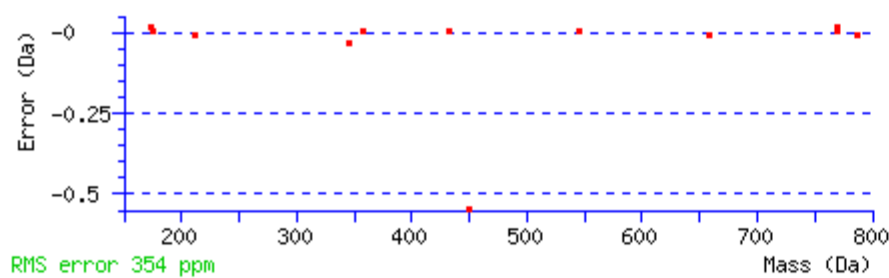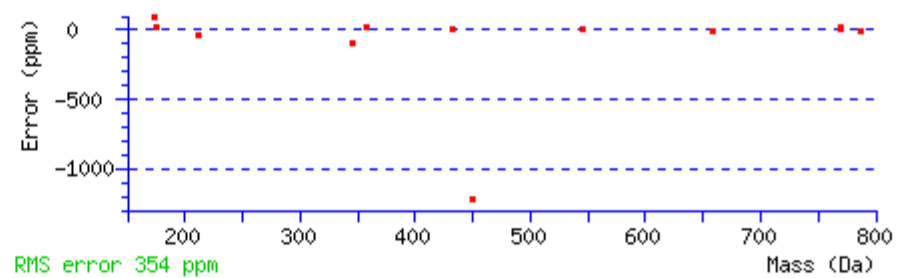

NCBI BLAST search of [NLELLSVAR](#)

(Parameters: blastp, nr protein database, expect=20000, no filter, PAM30)

Other BLAST [web gateways](#)

## All matches to this query

| Score | Mr(calc):   | Delta     | Sequence                   |
|-------|-------------|-----------|----------------------------|
| 36.5  | 1013.586914 | -0.002226 | <a href="#">NLELLSVAR</a>  |
| 20.6  | 1013.586914 | -0.002226 | <a href="#">QVEILREK</a>   |
| 8.4   | 1013.586914 | -0.002226 | <a href="#">LDKLEIQR</a>   |
| 1.8   | 1013.590973 | -0.006285 | <a href="#">GLGLGFPLPK</a> |
| 0.1   | 1013.586929 | -0.002241 | <a href="#">RLSSTPLPK</a>  |

Mascot: <http://www.matrixscience.com/>

# MASCOT SEARCH RESULTS

## Peptide View

MS/MS Fragmentation of **SADIALVAGGSR**

Found in **RM02\_HUMAN**, 39S ribosomal protein L2, mitochondrial OS=Homo sapiens GN=MRPL2 PE=1 SV=2

Match to Query 24670: 1115.593508 from(558.804030,2+) rtinseconds(1921) index(19795)

Title: Locus:1.1.1.2053.32

Data file 2011-11-14 - TFD - EP 8-5.mgf

Click mouse within plot area to zoom in by factor of two about that point

Or, Plot from  to  Da

Label all possible matches  Label matches used for scoring

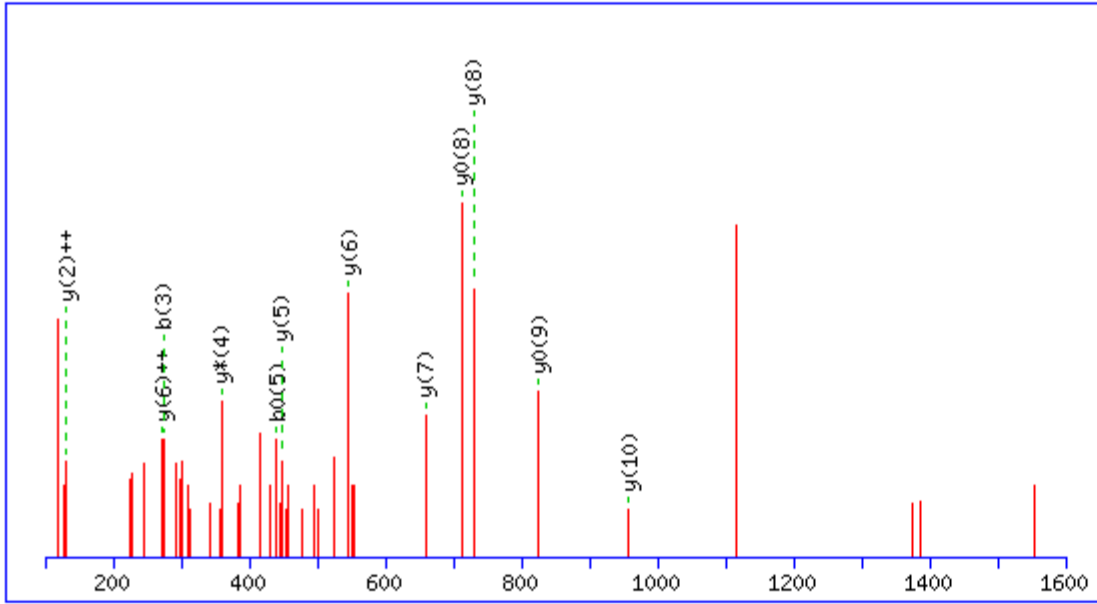

Monoisotopic mass of neutral peptide Mr(calc): 1115.593475

Fixed modifications: Propionamide (C) (apply to specified residues or termini only)

Ions Score: 35 Expect: 0.0012

Matches : 12/108 fragment ions using 15 most intense peaks [\(help\)](#)

| #  | b                 | b <sup>++</sup> | b <sup>0</sup>    | b <sup>0++</sup> | Seq. | y                 | y <sup>++</sup>   | y <sup>*</sup>    | y <sup>*++</sup> | y <sup>0</sup>    | y <sup>0++</sup> | #  |
|----|-------------------|-----------------|-------------------|------------------|------|-------------------|-------------------|-------------------|------------------|-------------------|------------------|----|
| 1  | 88.039304         | 44.523290       | 70.028739         | 35.518008        | S    |                   |                   |                   |                  |                   |                  | 12 |
| 2  | 159.076418        | 80.041847       | 141.065853        | 71.036564        | A    | 1029.568735       | 515.288006        | 1012.542186       | 506.774731       | 1011.558170       | 506.282723       | 11 |
| 3  | <b>274.103361</b> | 137.555319      | 256.092796        | 128.550036       | D    | <b>958.531621</b> | 479.769449        | 941.505072        | 471.256174       | 940.521056        | 470.764166       | 10 |
| 4  | 387.187425        | 194.097351      | 369.176860        | 185.092068       | I    | 843.504678        | 422.255977        | 826.478129        | 413.742703       | <b>825.494113</b> | 413.250695       | 9  |
| 5  | 458.224539        | 229.615907      | <b>440.213974</b> | 220.610625       | A    | <b>730.420614</b> | 365.713945        | 713.394065        | 357.200671       | <b>712.410049</b> | 356.708663       | 8  |
| 6  | 571.308603        | 286.157940      | 553.298038        | 277.152657       | L    | <b>659.383500</b> | 330.195388        | 642.356951        | 321.682114       | 641.372935        | 321.190106       | 7  |
| 7  | 670.377017        | 335.692147      | 652.366452        | 326.686864       | V    | <b>546.299436</b> | <b>273.653356</b> | 529.272887        | 265.140082       | 528.288871        | 264.648074       | 6  |
| 8  | 741.414131        | 371.210704      | 723.403566        | 362.205421       | A    | <b>447.231022</b> | 224.119149        | 430.204473        | 215.605875       | 429.220457        | 215.113867       | 5  |
| 9  | 798.435595        | 399.721436      | 780.425030        | 390.716153       | G    | 376.193908        | 188.600592        | <b>359.167359</b> | 180.087318       | 358.183343        | 179.595310       | 4  |
| 10 | 855.457059        | 428.232168      | 837.446494        | 419.226885       | G    | 319.172444        | 160.089860        | 302.145895        | 151.576586       | 301.161879        | 151.084578       | 3  |
| 11 | 942.489087        | 471.748182      | 924.478522        | 462.742899       | S    | 262.150980        | <b>131.579128</b> | 245.124431        | 123.065854       | 244.140415        | 122.573846       | 2  |
| 12 |                   |                 |                   |                  | R    | 175.118952        | 88.063114         | 158.092403        | 79.549840        |                   |                  | 1  |

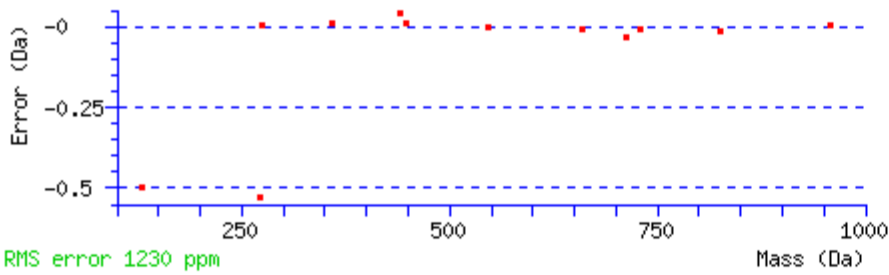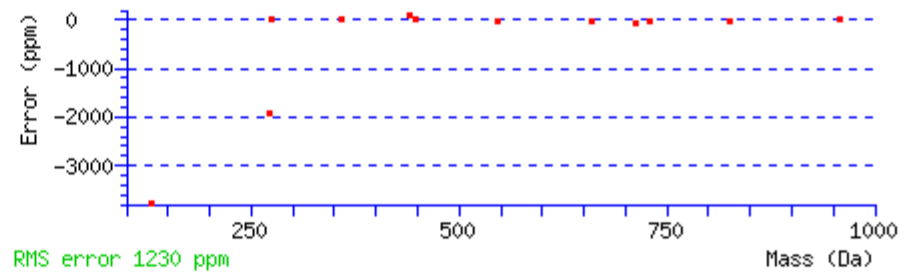

NCBI BLAST search of [SADIALVAGGSR](#)

(Parameters: blastp, nr protein database, expect=20000, no filter, PAM30)

Other BLAST [web gateways](#)

## All matches to this query

| Score | Mr(calc):   | Delta    | Sequence                     |
|-------|-------------|----------|------------------------------|
| 34.7  | 1115.593475 | 0.000033 | <a href="#">SADIALVAGGSR</a> |
| 3.4   | 1115.583588 | 0.009920 | <a href="#">DWRSGKPVR</a>    |

Mascot: <http://www.matrixscience.com/>

# **MASCOT** Mascot Search Results

## Peptide View

MS/MS Fragmentation of **IVTTPQTVLR**

Found in **RM21\_HUMAN**, 39S ribosomal protein L21, mitochondrial OS=Homo sapiens GN=MRPL21 PE=1 SV=2

Match to Query 25951: 1126.675468 from(564.345010,2+) rtinseconds(1981) index(19097)

Title: Locus:1.1.1.2027.36

Data file 2011-11-14 - TFD - EP 8-6.mgf

Click mouse within plot area to zoom in by factor of two about that point

Or, Plot from  to  Da

Label all possible matches  Label matches used for scoring

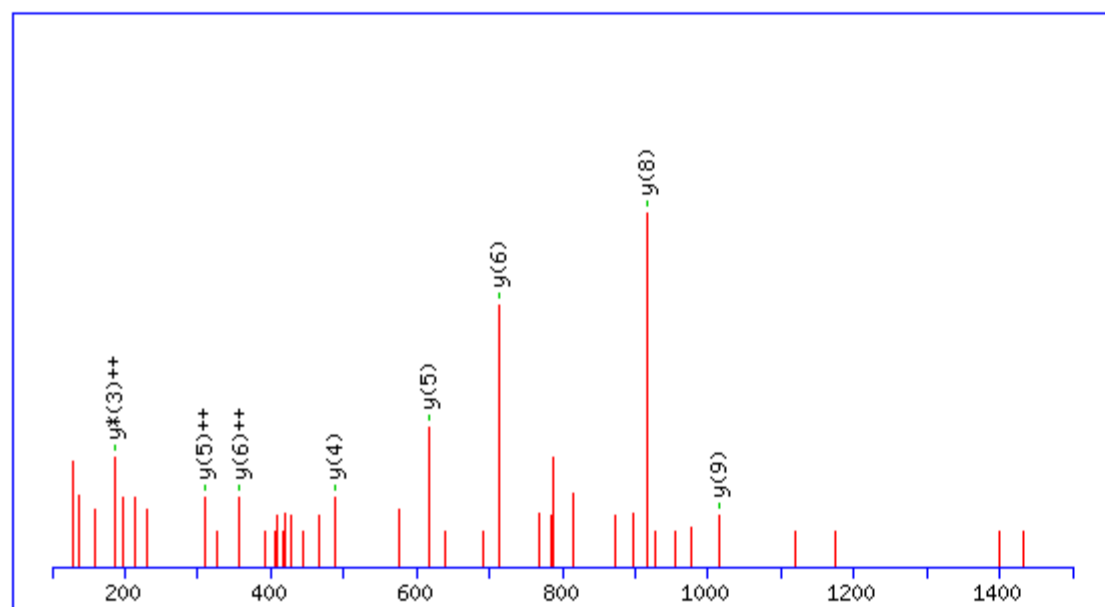

Monoisotopic mass of neutral peptide Mr(calc): 1126.671021

Fixed modifications: Propionamide (C) (apply to specified residues or termini only)

Ions Score: 39 Expect: 0.00059

Matches : 8/88 fragment ions using 10 most intense peaks ([help](#))

| #  | b          | b <sup>++</sup> | b <sup>*</sup> | b <sup>*++</sup> | b <sup>0</sup> | b <sup>0++</sup> | Seq. | y           | y <sup>++</sup> | y <sup>*</sup> | y <sup>*++</sup> | y <sup>0</sup> | y <sup>0++</sup> | #  |
|----|------------|-----------------|----------------|------------------|----------------|------------------|------|-------------|-----------------|----------------|------------------|----------------|------------------|----|
| 1  | 114.091340 | 57.549308       |                |                  |                |                  | I    |             |                 |                |                  |                |                  | 10 |
| 2  | 213.159754 | 107.083515      |                |                  |                |                  | V    | 1014.594223 | 507.800750      | 997.567674     | 499.287475       | 996.583658     | 498.795467       | 9  |
| 3  | 314.207433 | 157.607354      |                |                  | 296.196868     | 148.602072       | T    | 915.525809  | 458.266543      | 898.499260     | 449.753268       | 897.515244     | 449.261260       | 8  |
| 4  | 415.255112 | 208.131194      |                |                  | 397.244547     | 199.125912       | T    | 814.478130  | 407.742703      | 797.451581     | 399.229429       | 796.467565     | 398.737421       | 7  |
| 5  | 512.307876 | 256.657576      |                |                  | 494.297311     | 247.652294       | P    | 713.430451  | 357.218864      | 696.403902     | 348.705589       | 695.419886     | 348.213581       | 6  |
| 6  | 640.366454 | 320.686865      | 623.339905     | 312.173591       | 622.355889     | 311.681583       | Q    | 616.377687  | 308.692482      | 599.351138     | 300.179207       | 598.367122     | 299.687199       | 5  |
| 7  | 741.414133 | 371.210705      | 724.387584     | 362.697430       | 723.403568     | 362.205422       | T    | 488.319109  | 244.663193      | 471.292560     | 236.149918       | 470.308544     | 235.657910       | 4  |
| 8  | 840.482547 | 420.744912      | 823.455998     | 412.231637       | 822.471982     | 411.739629       | V    | 387.271430  | 194.139353      | 370.244881     | 185.626079       |                |                  | 3  |
| 9  | 953.566611 | 477.286944      | 936.540062     | 468.773669       | 935.556046     | 468.281661       | L    | 288.203016  | 144.605146      | 271.176467     | 136.091872       |                |                  | 2  |
| 10 |            |                 |                |                  |                |                  | R    | 175.118952  | 88.063114       | 158.092403     | 79.549840        |                |                  | 1  |

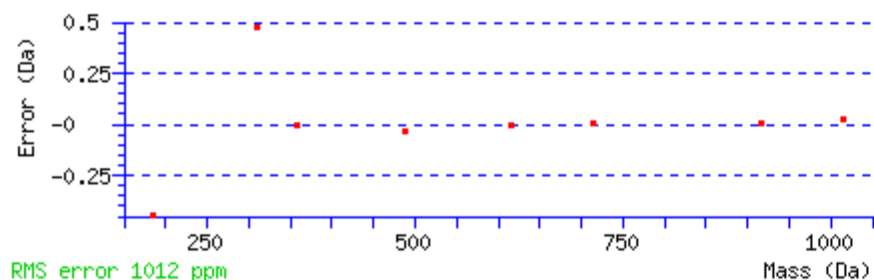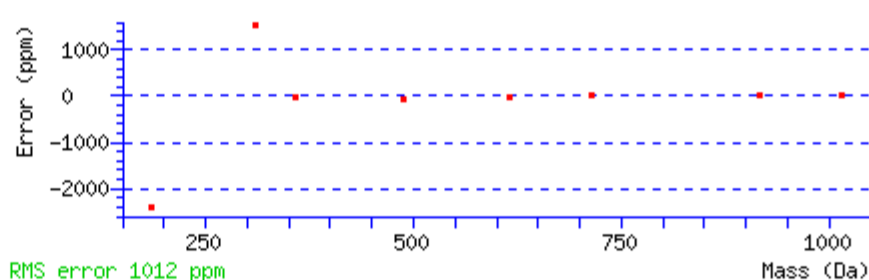

NCBI BLAST search of [IVTTPQTVLR](#)

(Parameters: blastp, nr protein database, expect=20000, no filter, PAM30)

Other BLAST [web gateways](#)

## All matches to this query

| Score | Mr(calc):   | Delta    | Sequence                   |
|-------|-------------|----------|----------------------------|
| 39.3  | 1126.671021 | 0.004447 | <a href="#">IVTTPQTVLR</a> |
| 8.0   | 1126.671021 | 0.004447 | <a href="#">IVNTVPITVR</a> |
| 1.0   | 1126.670990 | 0.004478 | <a href="#">LVALLNTLDR</a> |
| 0.3   | 1126.670975 | 0.004493 | <a href="#">VLAEVEALKR</a> |

# **MASCOT** Mascot Search Results

## Peptide View

MS/MS Fragmentation of **NTEAVDLITR**

Found in **RM27\_HUMAN**, 39S ribosomal protein L27, mitochondrial OS=Homo sapiens GN=MRPL27 PE=1 SV=1

Match to Query 22774: 1130.599388 from(566.306970,2+) rtinseconds(2151) index(19857)

Title: Locus:1.1.1.2226.22

Data file 2011-11-10 - TFD - EP 3-7.mgf

Click mouse within plot area to zoom in by factor of two about that point

Or, Plot from  to  Da

Label all possible matches  Label matches used for scoring

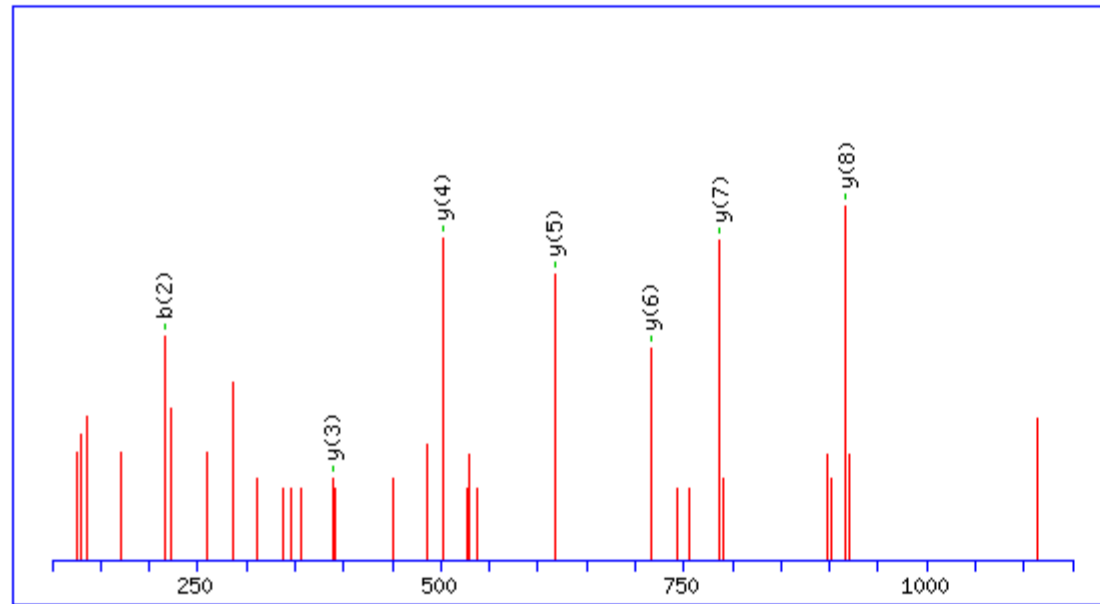

Monoisotopic mass of neutral peptide Mr(calc): 1130.593140

Fixed modifications: Propionamide (C) (apply to specified residues or termini only)

Ions Score: 51 Expect: 0.0001

Matches : 7/104 fragment ions using 9 most intense peaks ([help](#))

| #  | b                 | b <sup>++</sup> | b <sup>*</sup> | b <sup>*++</sup> | b <sup>0</sup> | b <sup>0++</sup> | Seq. | y                 | y <sup>++</sup> | y <sup>*</sup> | y <sup>*++</sup> | y <sup>0</sup> | y <sup>0++</sup> | #  |
|----|-------------------|-----------------|----------------|------------------|----------------|------------------|------|-------------------|-----------------|----------------|------------------|----------------|------------------|----|
| 1  | 115.050203        | 58.028740       | 98.023654      | 49.515465        |                |                  | N    |                   |                 |                |                  |                |                  | 10 |
| 2  | <b>216.097882</b> | 108.552579      | 199.071333     | 100.039305       | 198.087317     | 99.547296        | T    | 1017.557502       | 509.282389      | 1000.530953    | 500.769115       | 999.546937     | 500.277107       | 9  |
| 3  | 345.140475        | 173.073875      | 328.113926     | 164.560601       | 327.129910     | 164.068593       | E    | <b>916.509823</b> | 458.758550      | 899.483274     | 450.245275       | 898.499258     | 449.753267       | 8  |
| 4  | 416.177589        | 208.592432      | 399.151040     | 200.079158       | 398.167024     | 199.587150       | A    | <b>787.467230</b> | 394.237253      | 770.440681     | 385.723979       | 769.456665     | 385.231971       | 7  |
| 5  | 515.246003        | 258.126640      | 498.219454     | 249.613365       | 497.235438     | 249.121357       | V    | <b>716.430116</b> | 358.718696      | 699.403567     | 350.205422       | 698.419551     | 349.713414       | 6  |
| 6  | 630.272946        | 315.640111      | 613.246397     | 307.126836       | 612.262381     | 306.634828       | D    | <b>617.361702</b> | 309.184489      | 600.335153     | 300.671215       | 599.351137     | 300.179207       | 5  |
| 7  | 743.357010        | 372.182143      | 726.330461     | 363.668868       | 725.346445     | 363.176860       | L    | <b>502.334759</b> | 251.671018      | 485.308210     | 243.157743       | 484.324194     | 242.665735       | 4  |
| 8  | 856.441074        | 428.724175      | 839.414525     | 420.210900       | 838.430509     | 419.718892       | I    | <b>389.250695</b> | 195.128986      | 372.224146     | 186.615711       | 371.240130     | 186.123703       | 3  |
| 9  | 957.488753        | 479.248015      | 940.462204     | 470.734740       | 939.478188     | 470.242732       | T    | 276.166631        | 138.586954      | 259.140082     | 130.073679       | 258.156066     | 129.581671       | 2  |
| 10 |                   |                 |                |                  |                |                  | R    | 175.118952        | 88.063114       | 158.092403     | 79.549840        |                |                  | 1  |

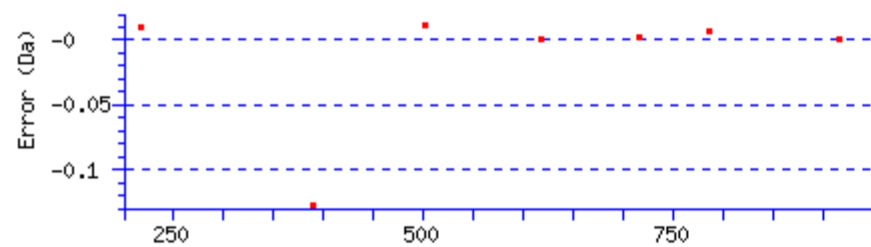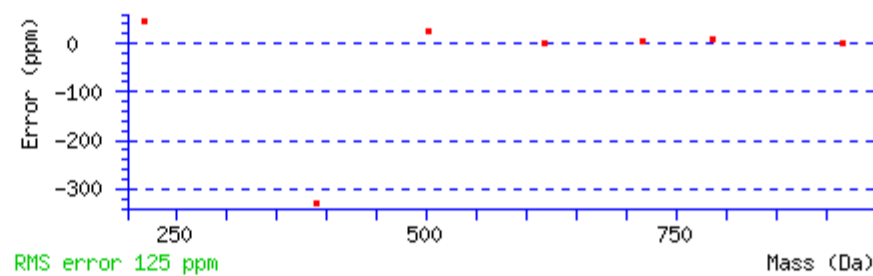

NCBI BLAST search of [NTEAVDLITR](#)

(Parameters: blastp, nr protein database, expect=20000, no filter, PAM30)

Other BLAST [web gateways](#)

## All matches to this query

| Score | Mr(calc):   | Delta     | Sequence                    |
|-------|-------------|-----------|-----------------------------|
| 51.0  | 1130.593140 | 0.006248  | <a href="#">NTEAVDLITR</a>  |
| 8.2   | 1130.608383 | -0.008995 | <a href="#">EPGYIRAPTK</a>  |
| 4.8   | 1130.593124 | 0.006264  | <a href="#">SKELSPGSAQK</a> |

Mascot: <http://www.matrixscience.com/>

# **MATRIX** SCIENCE Mascot Search Results

## Peptide View

MS/MS Fragmentation of **L TLLHYDPVVK**

Found in **RM33\_HUMAN**, 39S ribosomal protein L33, mitochondrial OS=Homo sapiens GN=MRPL33 PE=1 SV=1

Match to Query 19749: 1296.747912 from(433.256580,3+) rtinseconds(2607) index(14501)

Title: Locus:1.1.1.2649.4

Data file 2011-11-13 - TFD - EP 7-8.mgf

Click mouse within plot area to zoom in by factor of two about that point

Or, Plot from  to  Da

Label all possible matches  Label matches used for scoring

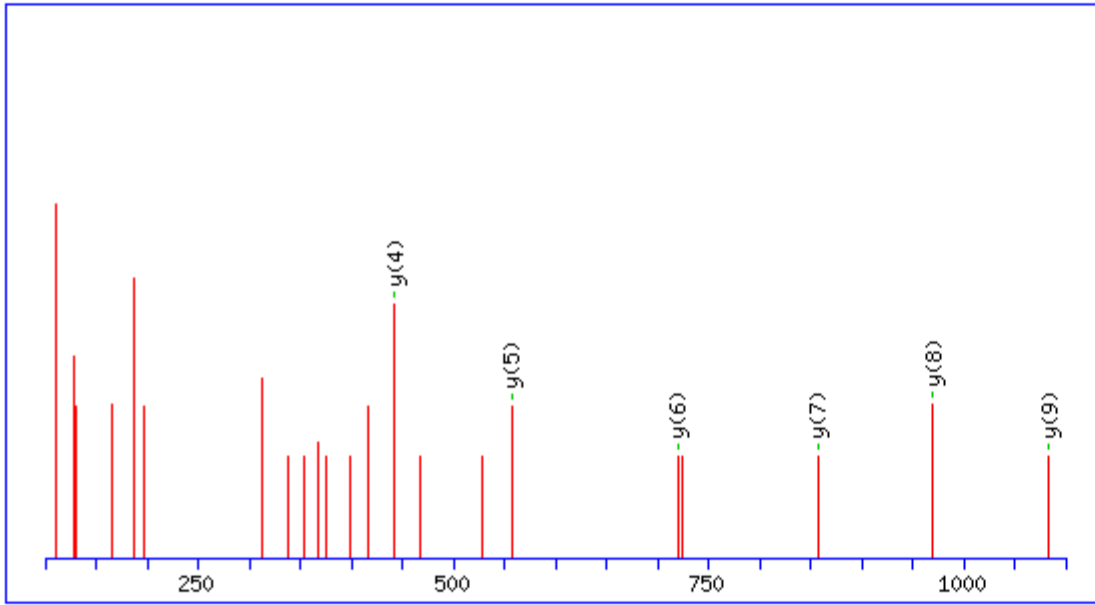

Monoisotopic mass of neutral peptide Mr(calc): 1296.744171

Fixed modifications: Propionamide (C) (apply to specified residues or termini only)

Ions Score: 47 Expect: 0.00011

Matches : 6/90 fragment ions using 8 most intense peaks [\(help\)](#)

| #  | b           | b <sup>++</sup> | b <sup>0</sup> | b <sup>0++</sup> | Seq. | y                  | y <sup>++</sup> | y <sup>*</sup> | y <sup>*++</sup> | y <sup>0</sup> | y <sup>0++</sup> | #  |
|----|-------------|-----------------|----------------|------------------|------|--------------------|-----------------|----------------|------------------|----------------|------------------|----|
| 1  | 114.091340  | 57.549308       |                |                  | L    |                    |                 |                |                  |                |                  | 11 |
| 2  | 215.139019  | 108.073147      | 197.128454     | 99.067865        | T    | 1184.667387        | 592.837332      | 1167.640838    | 584.324057       | 1166.656822    | 583.832049       | 10 |
| 3  | 328.223083  | 164.615179      | 310.212518     | 155.609897       | L    | <b>1083.619708</b> | 542.313492      | 1066.593159    | 533.800218       | 1065.609143    | 533.308210       | 9  |
| 4  | 441.307147  | 221.157211      | 423.296582     | 212.151929       | L    | <b>970.535644</b>  | 485.771460      | 953.509095     | 477.258186       | 952.525079     | 476.766178       | 8  |
| 5  | 578.366059  | 289.686668      | 560.355494     | 280.681385       | H    | <b>857.451580</b>  | 429.229428      | 840.425031     | 420.716154       | 839.441015     | 420.224146       | 7  |
| 6  | 741.429388  | 371.218332      | 723.418823     | 362.213050       | Y    | <b>720.392668</b>  | 360.699972      | 703.366119     | 352.186698       | 702.382103     | 351.694690       | 6  |
| 7  | 856.456331  | 428.731804      | 838.445766     | 419.726521       | D    | <b>557.329339</b>  | 279.168308      | 540.302790     | 270.655033       | 539.318774     | 270.163025       | 5  |
| 8  | 953.509095  | 477.258186      | 935.498530     | 468.252903       | P    | <b>442.302396</b>  | 221.654836      | 425.275847     | 213.141562       |                |                  | 4  |
| 9  | 1052.577509 | 526.792393      | 1034.566944    | 517.787110       | V    | 345.249632         | 173.128454      | 328.223083     | 164.615180       |                |                  | 3  |
| 10 | 1151.645923 | 576.326600      | 1133.635358    | 567.321317       | V    | 246.181218         | 123.594247      | 229.154669     | 115.080973       |                |                  | 2  |
| 11 |             |                 |                |                  | K    | 147.112804         | 74.060040       | 130.086255     | 65.546765        |                |                  | 1  |

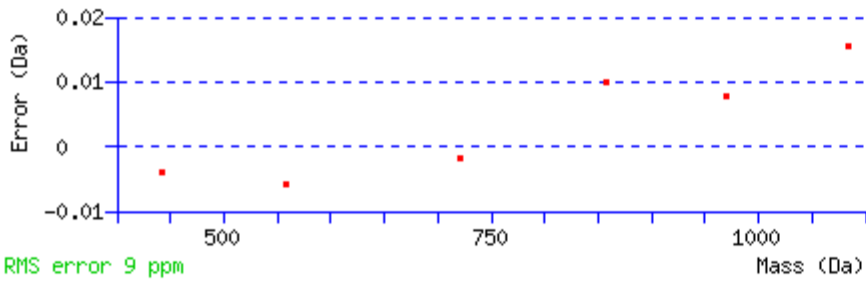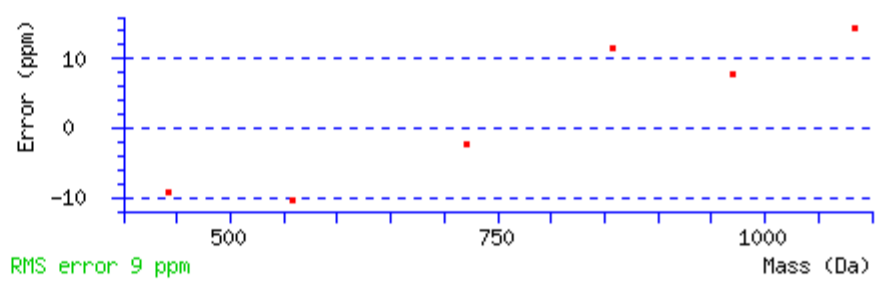

NCBI BLAST search of **L TLLHYDPVVK**

(Parameters: blastp, nr protein database, expect=20000, no filter, PAM30)

Other BLAST [web gateways](#)

## All matches to this query

| Score | Mr(calc):   | Delta     | Sequence                                |
|-------|-------------|-----------|-----------------------------------------|
| 46.8  | 1296.744171 | 0.003741  | <a href="#">L TLLHYDPVVK</a>            |
| 6.1   | 1296.751358 | -0.003446 | <a href="#">I D V I G N E I L R R</a>   |
| 1.9   | 1296.751328 | -0.003416 | <a href="#">A L A A E L N Q L R A K</a> |
| 0.8   | 1296.747543 | 0.000369  | <a href="#">A G I P C P T V V L L K</a> |
| 0.1   | 1296.747543 | 0.000369  | <a href="#">A G I P C P T V V L L K</a> |

Mascot: <http://www.matrixscience.com/>

**MATRIX SCIENCE Mascot Search Results**

**Peptide View**

MS/MS Fragmentation of **DPNLFPFKEK**

Found in **RM40\_HUMAN**, 39S ribosomal protein L40, mitochondrial OS=Homo sapiens GN=MRPL40 PE=1 SV=1

Match to Query 23738: 1105.546968 from(553.780760,2+) rtinseconds(3127) index(38054)

Title: Locus:1.1.1.2458.7

Data file 2011-11-10 - TFD - EP 3-6.mgf

Click mouse within plot area to zoom in by factor of two about that point

Or, Plot from  to  Da

Label all possible matches  Label matches used for scoring

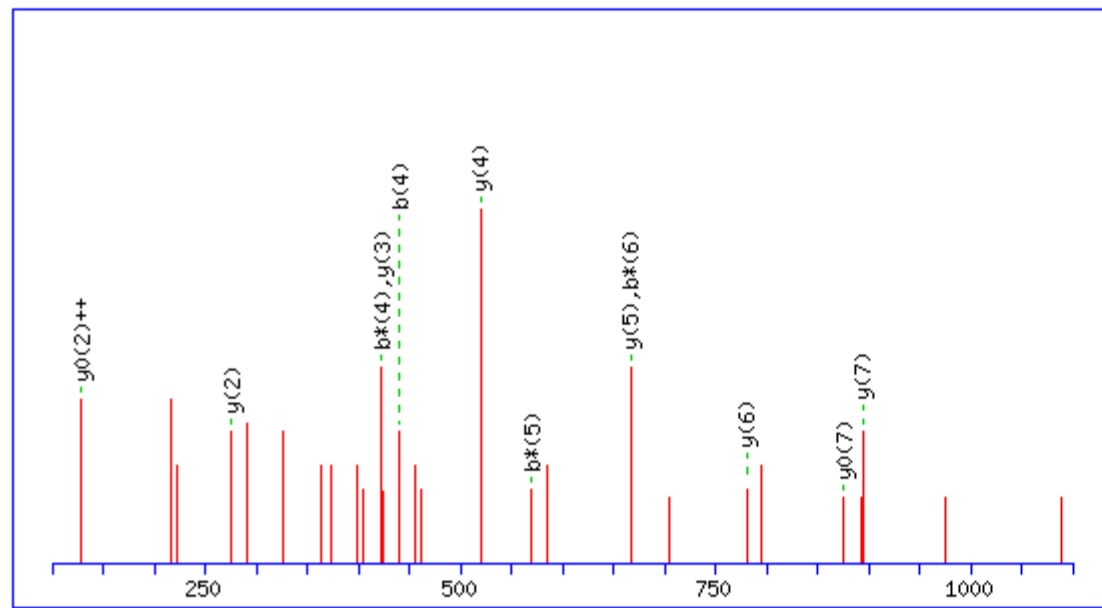

Monoisotopic mass of neutral peptide Mr(calc): 1105.544403

Fixed modifications: Propionamide (C) (apply to specified residues or termini only)

Ions Score: 37 Expect: 0.0046

Matches : 12/90 fragment ions using 18 most intense peaks [\(help\)](#)

| # | b                 | b <sup>++</sup> | b <sup>*</sup>    | b <sup>*++</sup> | b <sup>0</sup> | b <sup>0++</sup> | Seq. | y                 | y <sup>++</sup> | y <sup>*</sup> | y <sup>*++</sup> | y <sup>0</sup>    | y <sup>0++</sup>  | # |
|---|-------------------|-----------------|-------------------|------------------|----------------|------------------|------|-------------------|-----------------|----------------|------------------|-------------------|-------------------|---|
| 1 | 116.034219        | 58.520748       |                   |                  | 98.023654      | 49.515465        | D    |                   |                 |                |                  |                   |                   | 9 |
| 2 | 213.086983        | 107.047129      |                   |                  | 195.076418     | 98.041847        | P    | 991.524744        | 496.266010      | 974.498195     | 487.752736       | 973.514179        | 487.260728        | 8 |
| 3 | 327.129910        | 164.068593      | 310.103361        | 155.555319       | 309.119345     | 155.063311       | N    | <b>894.471980</b> | 447.739628      | 877.445431     | 439.226354       | <b>876.461415</b> | 438.734346        | 7 |
| 4 | <b>440.213974</b> | 220.610625      | <b>423.187425</b> | 212.097351       | 422.203409     | 211.605343       | L    | <b>780.429053</b> | 390.718165      | 763.402504     | 382.204890       | 762.418488        | 381.712882        | 6 |
| 5 | 587.282388        | 294.144832      | <b>570.255839</b> | 285.631558       | 569.271823     | 285.139550       | F    | <b>667.344989</b> | 334.176133      | 650.318440     | 325.662858       | 649.334424        | 325.170850        | 5 |
| 6 | 684.335152        | 342.671214      | <b>667.308603</b> | 334.157940       | 666.324587     | 333.665932       | P    | <b>520.276575</b> | 260.641926      | 503.250026     | 252.128651       | 502.266010        | 251.636643        | 4 |
| 7 | 831.403566        | 416.205421      | 814.377017        | 407.692147       | 813.393001     | 407.200139       | F    | <b>423.223811</b> | 212.115543      | 406.197262     | 203.602269       | 405.213246        | 203.110261        | 3 |
| 8 | 960.446159        | 480.726718      | 943.419610        | 472.213443       | 942.435594     | 471.721435       | E    | <b>276.155397</b> | 138.581336      | 259.128848     | 130.068062       | 258.144832        | <b>129.576054</b> | 2 |
| 9 |                   |                 |                   |                  |                |                  | K    | 147.112804        | 74.060040       | 130.086255     | 65.546765        |                   |                   | 1 |

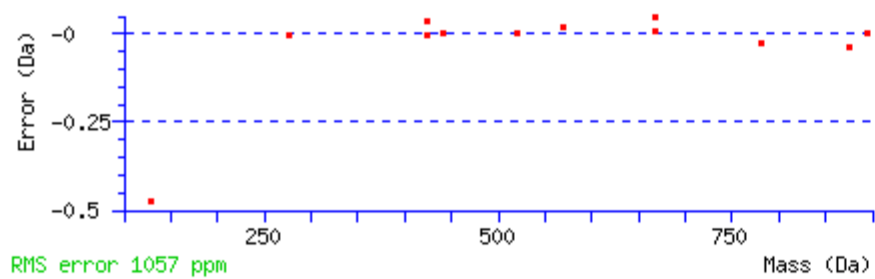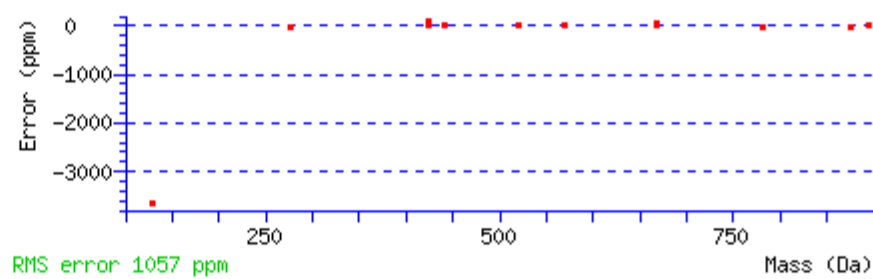

NCBI BLAST search of [DPNLFPFKEK](#)

(Parameters: blastp, nr protein database, expect=20000, no filter, PAM30)

Other BLAST [web gateways](#)

**All matches to this query**

| Score | Mr(calc):   | Delta     | Sequence                   |
|-------|-------------|-----------|----------------------------|
| 37.4  | 1105.544403 | 0.002565  | <a href="#">DPNLFPFKEK</a> |
| 7.8   | 1105.554977 | -0.008009 | <a href="#">RVAMIDETR</a>  |
| 3.8   | 1105.551620 | -0.004652 | <a href="#">DDPRLSFTR</a>  |



# MASCOT SCIENCE Mascot Search Results

## Peptide View

### MS/MS Fragmentation of **YVQQLQR**

Found in **RM43\_HUMAN**, 39S ribosomal protein L43, mitochondrial OS=Homo sapiens GN=MRPL43 PE=1 SV=1

Match to Query 11172: 933.502308 from(467.758430,2+) rtinseconds(1163) index(4035)

Title: Locus:1.1.1.1710.20

Data file 2011-11-10 - TFD - EP 3-6.mgf

Click mouse within plot area to zoom in by factor of two about that point

Or,   to  Da

Label all possible matches  Label matches used for scoring

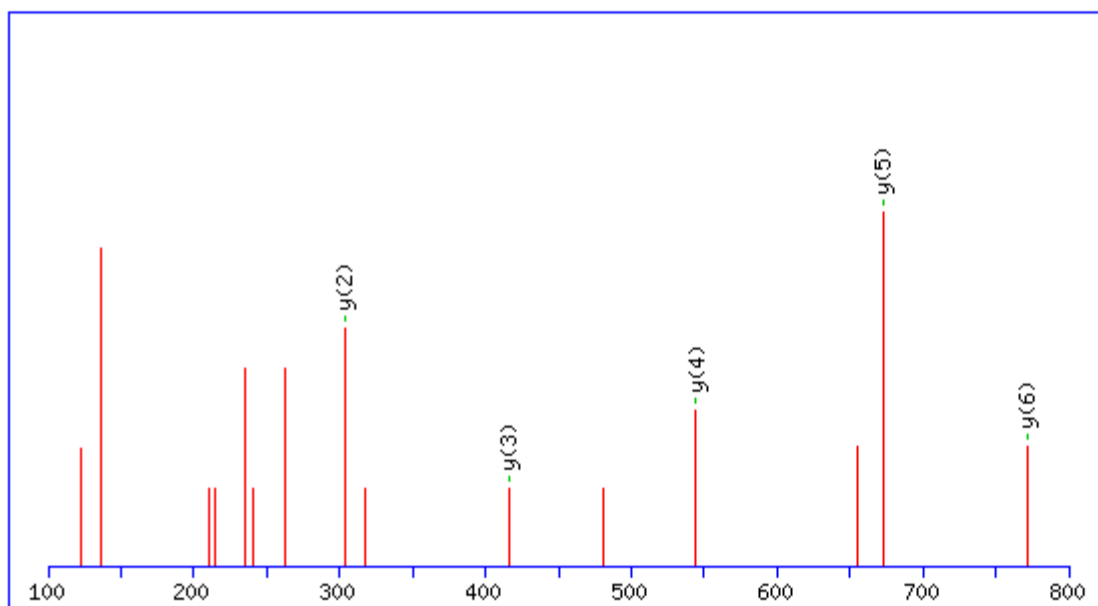

Monoisotopic mass of neutral peptide Mr(calc): 933.503204

Fixed modifications: Propionamide (C) (apply to specified residues or termini only)

Ions Score: 41 Expect: 0.00085

Matches : 5/44 fragment ions using 7 most intense peaks ([help](#))

| # | b          | b <sup>++</sup> | b <sup>*</sup> | b <sup>*++</sup> | Seq. | y          | y <sup>++</sup> | y <sup>*</sup> | y <sup>*++</sup> | # |
|---|------------|-----------------|----------------|------------------|------|------------|-----------------|----------------|------------------|---|
| 1 | 164.070605 | 82.538940       |                |                  | Y    |            |                 |                |                  | 7 |
| 2 | 263.139019 | 132.073148      |                |                  | V    | 771.447164 | 386.227220      | 754.420615     | 377.713946       | 6 |
| 3 | 391.197597 | 196.102437      | 374.171048     | 187.589162       | Q    | 672.378750 | 336.693013      | 655.352201     | 328.179739       | 5 |
| 4 | 519.256175 | 260.131726      | 502.229626     | 251.618451       | Q    | 544.320172 | 272.663724      | 527.293623     | 264.150450       | 4 |
| 5 | 632.340239 | 316.673758      | 615.313690     | 308.160483       | L    | 416.261594 | 208.634435      | 399.235045     | 200.121161       | 3 |
| 6 | 760.398817 | 380.703047      | 743.372268     | 372.189772       | Q    | 303.177530 | 152.092403      | 286.150981     | 143.579129       | 2 |
| 7 |            |                 |                |                  | R    | 175.118952 | 88.063114       | 158.092403     | 79.549840        | 1 |

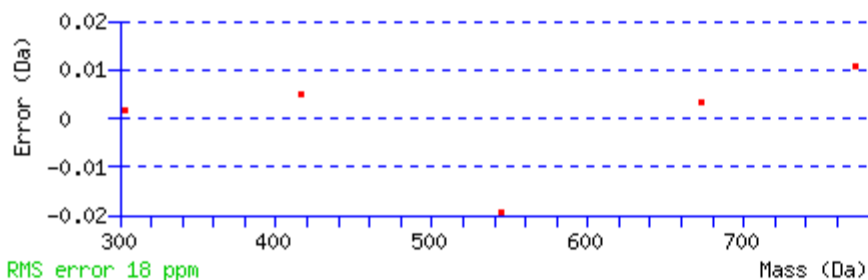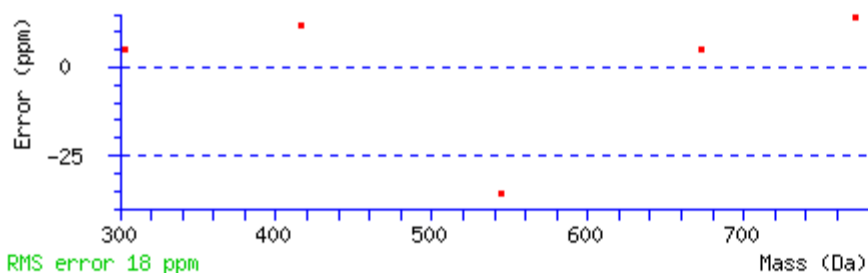

### NCBI BLAST search of **YVQQLQR**

(Parameters: blastp, nr protein database, expect=20000, no filter, PAM30)

Other BLAST [web gateways](#)

### All matches to this query

| Score | Mr(calc):  | Delta     | Sequence                |
|-------|------------|-----------|-------------------------|
| 40.8  | 933.503204 | -0.000896 | <a href="#">YVQQLQR</a> |

# MASCOT SCIENCE Mascot Search Results

## Peptide View

MS/MS Fragmentation of **DFTATDLSEFAAK**

Found in **THIM\_HUMAN**, 3-ketoacyl-CoA thiolase, mitochondrial OS=Homo sapiens GN=ACAA2 PE=1 SV=2

Match to Query 42531: 1414.674868 from(708.344710,2+) rtinseconds(3094) index(43253)

Title: Locus:1.1.1.2518.34

Data file 2011-11-10 - TFD - EP 3-4.mgf

Click mouse within plot area to zoom in by factor of two about that point

Or, Plot from  to  Da

Label all possible matches  Label matches used for scoring

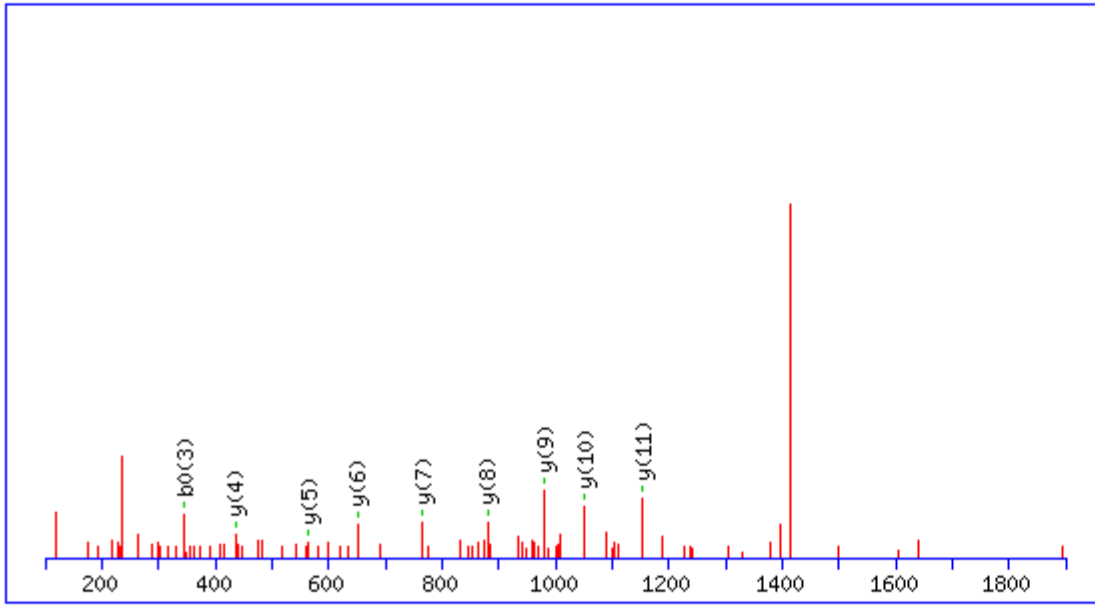

Monoisotopic mass of neutral peptide Mr(calc): 1414.661621

Fixed modifications: Propionamide (C) (apply to specified residues or termini only)

Ions Score: 63 Expect: 1.5e-006

Matches : 9/112 fragment ions using 13 most intense peaks [\(help\)](#)

| #  | b           | b <sup>++</sup> | b <sup>0</sup> | b <sup>0++</sup> | Seq. | y           | y <sup>++</sup> | y <sup>*</sup> | y <sup>***</sup> | y <sup>0</sup> | y <sup>0++</sup> | #  |
|----|-------------|-----------------|----------------|------------------|------|-------------|-----------------|----------------|------------------|----------------|------------------|----|
| 1  | 116.034219  | 58.520748       | 98.023654      | 49.515465        | D    |             |                 |                |                  |                |                  | 13 |
| 2  | 263.102633  | 132.054954      | 245.092068     | 123.049672       | F    | 1300.641960 | 650.824618      | 1283.615411    | 642.311344       | 1282.631395    | 641.819335       | 12 |
| 3  | 364.150312  | 182.578794      | 346.139747     | 173.573512       | T    | 1153.573546 | 577.290411      | 1136.546997    | 568.777137       | 1135.562981    | 568.285129       | 11 |
| 4  | 435.187426  | 218.097351      | 417.176861     | 209.092069       | A    | 1052.525867 | 526.766572      | 1035.499318    | 518.253297       | 1034.515302    | 517.761289       | 10 |
| 5  | 536.235105  | 268.621191      | 518.224540     | 259.615908       | T    | 981.488753  | 491.248015      | 964.462204     | 482.734740       | 963.478188     | 482.242732       | 9  |
| 6  | 651.262048  | 326.134662      | 633.251483     | 317.129380       | D    | 880.441074  | 440.724175      | 863.414525     | 432.210900       | 862.430509     | 431.718892       | 8  |
| 7  | 764.346112  | 382.676694      | 746.335547     | 373.671412       | L    | 765.414131  | 383.210704      | 748.387582     | 374.697429       | 747.403566     | 374.205421       | 7  |
| 8  | 851.378140  | 426.192708      | 833.367575     | 417.187426       | S    | 652.330067  | 326.668672      | 635.303518     | 318.155397       | 634.319502     | 317.663389       | 6  |
| 9  | 980.420733  | 490.714005      | 962.410168     | 481.708722       | E    | 565.298039  | 283.152658      | 548.271490     | 274.639383       | 547.287474     | 274.147375       | 5  |
| 10 | 1127.489147 | 564.248212      | 1109.478582    | 555.242929       | F    | 436.255446  | 218.631361      | 419.228897     | 210.118086       |                |                  | 4  |
| 11 | 1198.526261 | 599.766769      | 1180.515696    | 590.761486       | A    | 289.187032  | 145.097154      | 272.160483     | 136.583879       |                |                  | 3  |
| 12 | 1269.563375 | 635.285326      | 1251.552810    | 626.280043       | A    | 218.149918  | 109.578597      | 201.123369     | 101.065322       |                |                  | 2  |
| 13 |             |                 |                |                  | K    | 147.112804  | 74.060040       | 130.086255     | 65.546765        |                |                  | 1  |

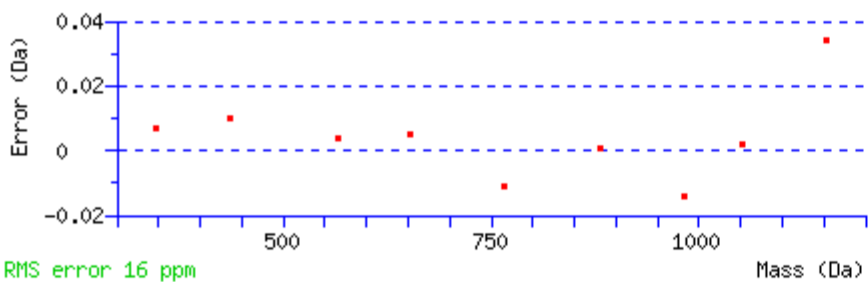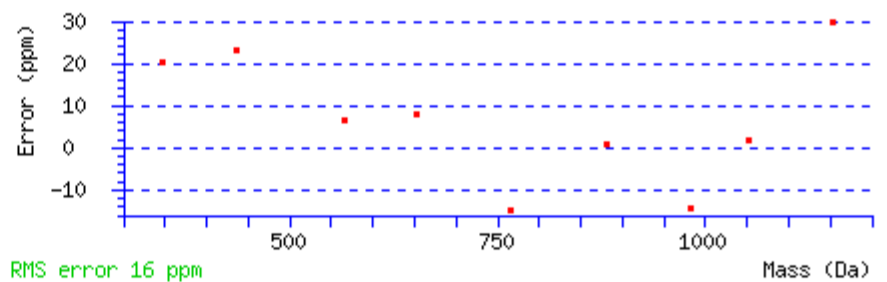

NCBI BLAST search of **DFTATDLSEFAAK**

(Parameters: blastp, nr protein database, expect=20000, no filter, PAM30)

Other BLAST [web gateways](#)

## All matches to this query

| Score | Mr(calc):   | Delta    | Sequence                      |
|-------|-------------|----------|-------------------------------|
| 63.2  | 1414.661621 | 0.013247 | <a href="#">DFTATDLSEFAAK</a> |
| 1.0   | 1414.669662 | 0.005206 | <a href="#">MCESYSRSLLR</a>   |
| 0.4   | 1414.666321 | 0.008547 | <a href="#">CRTLYPFSGER</a>   |

Mascot: <http://www.matrixscience.com/>

# MASCOT SCIENCE Mascot Search Results

## Peptide View

### MS/MS Fragmentation of **LTEGCSFR**

Found in **RS27L\_HUMAN**, 40S ribosomal protein S27-like OS=Homo sapiens GN=RPS27L PE=1 SV=3

Match to Query 7887: 968.437688 from(485.226120,2+) rtinseconds(1145) index(6338)

Title: Locus:1.1.1.882.18

Data file 2012-01-27 - TFD - Epitel - IEC - 10ul - 3.mgf

Click mouse within plot area to zoom in by factor of two about that point

Or, Plot from  to  Da

Label all possible matches  Label matches used for scoring

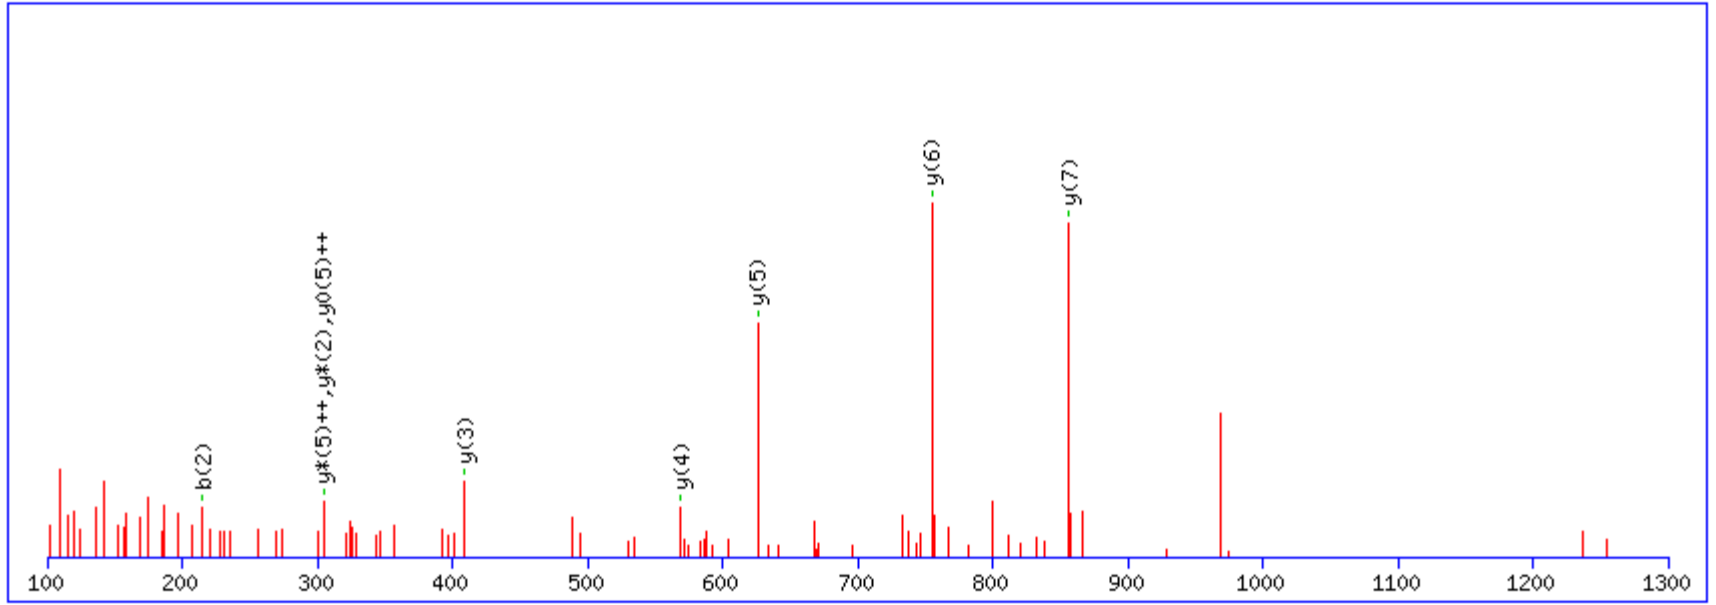

Monoisotopic mass of neutral peptide Mr(calc): 968.438568

Fixed modifications: Carbamidomethyl (C) (apply to specified residues or termini only)

Ions Score: 38 Expect: 0.00085

Matches : 9/64 fragment ions using 9 most intense peaks ([help](#))

| # | b                 | b <sup>++</sup> | b <sup>0</sup> | b <sup>0++</sup> | Seq. | y                 | y <sup>++</sup> | y <sup>*</sup>    | y <sup>*++</sup>  | y <sup>0</sup> | y <sup>0++</sup>  | # |
|---|-------------------|-----------------|----------------|------------------|------|-------------------|-----------------|-------------------|-------------------|----------------|-------------------|---|
| 1 | 114.091340        | 57.549308       |                |                  | L    |                   |                 |                   |                   |                |                   | 8 |
| 2 | <b>215.139019</b> | 108.073147      | 197.128454     | 99.067865        | T    | <b>856.361779</b> | 428.684528      | 839.335230        | 420.171253        | 838.351214     | 419.679245        | 7 |
| 3 | 344.181612        | 172.594444      | 326.171047     | 163.589162       | E    | <b>755.314100</b> | 378.160688      | 738.287551        | 369.647413        | 737.303535     | 369.155405        | 6 |
| 4 | 401.203076        | 201.105176      | 383.192511     | 192.099894       | G    | <b>626.271507</b> | 313.639391      | 609.244958        | <b>305.126117</b> | 608.260942     | <b>304.634109</b> | 5 |
| 5 | 561.233725        | 281.120501      | 543.223160     | 272.115218       | C    | <b>569.250043</b> | 285.128660      | 552.223494        | 276.615385        | 551.239478     | 276.123377        | 4 |
| 6 | 648.265753        | 324.636515      | 630.255188     | 315.631232       | S    | <b>409.219394</b> | 205.113335      | 392.192845        | 196.600060        | 391.208829     | 196.108052        | 3 |
| 7 | 795.334167        | 398.170722      | 777.323602     | 389.165439       | F    | 322.187366        | 161.597321      | <b>305.160817</b> | 153.084046        |                |                   | 2 |
| 8 |                   |                 |                |                  | R    | 175.118952        | 88.063114       | 158.092403        | 79.549839         |                |                   | 1 |

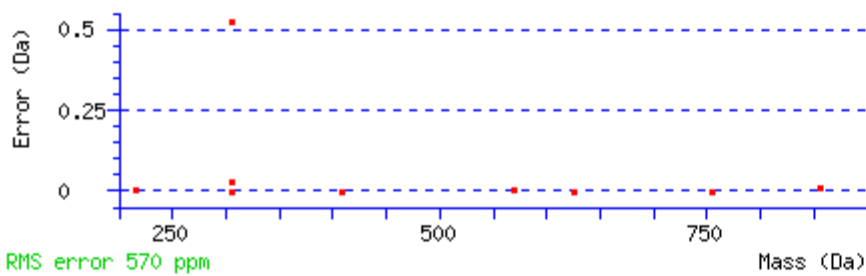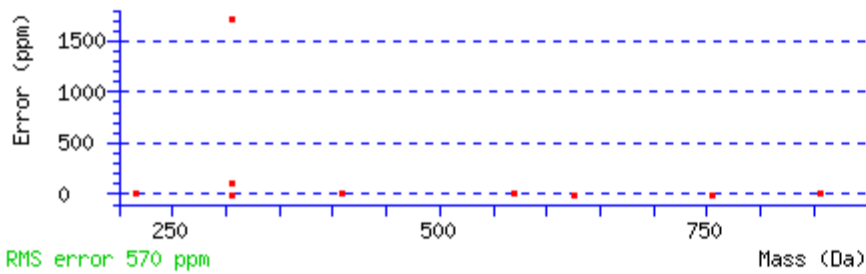

### NCBI BLAST search of **LTEGCSFR**

(Parameters: blastp, nr protein database, expect=20000, no filter, PAM30)

Other BLAST [web gateways](#)

### All matches to this query

| Score | Mr(calc):  | Delta     | Sequence                 |
|-------|------------|-----------|--------------------------|
| 38.0  | 968.438568 | -0.000880 | <a href="#">LTEGCSFR</a> |
| 4.9   | 968.438568 | -0.000880 | <a href="#">PGYTCSIR</a> |
| 0.0   | 968.438568 | -0.000880 | <a href="#">PTPMPHNK</a> |
| 0.0   | 968.438568 | -0.000880 | <a href="#">PTPMPHNK</a> |
| 0.0   | 968.438568 | -0.000880 | <a href="#">PTPMPHNK</a> |

# {MATRIX} SCIENCE Mascot Search Results

## Peptide View

MS/MS Fragmentation of **DGVLADFEAGLLR**

Found in **NT5C\_HUMAN**, 5'(3')-deoxyribonucleotidase, cytosolic type OS=Homo sapiens GN=NT5C PE=1 SV=2

Match to Query 37011: 1374.704968 from(688.359760,2+) rtinseconds(3958) index(59390)

Title: Locus:1.1.1.1943.20

Data file 2012-01-27 - TFD - Epitel - IEC - 10ul - 3.mgf

Click mouse within plot area to zoom in by factor of two about that point

Or, Plot from  to  Da

Label all possible matches  Label matches used for scoring

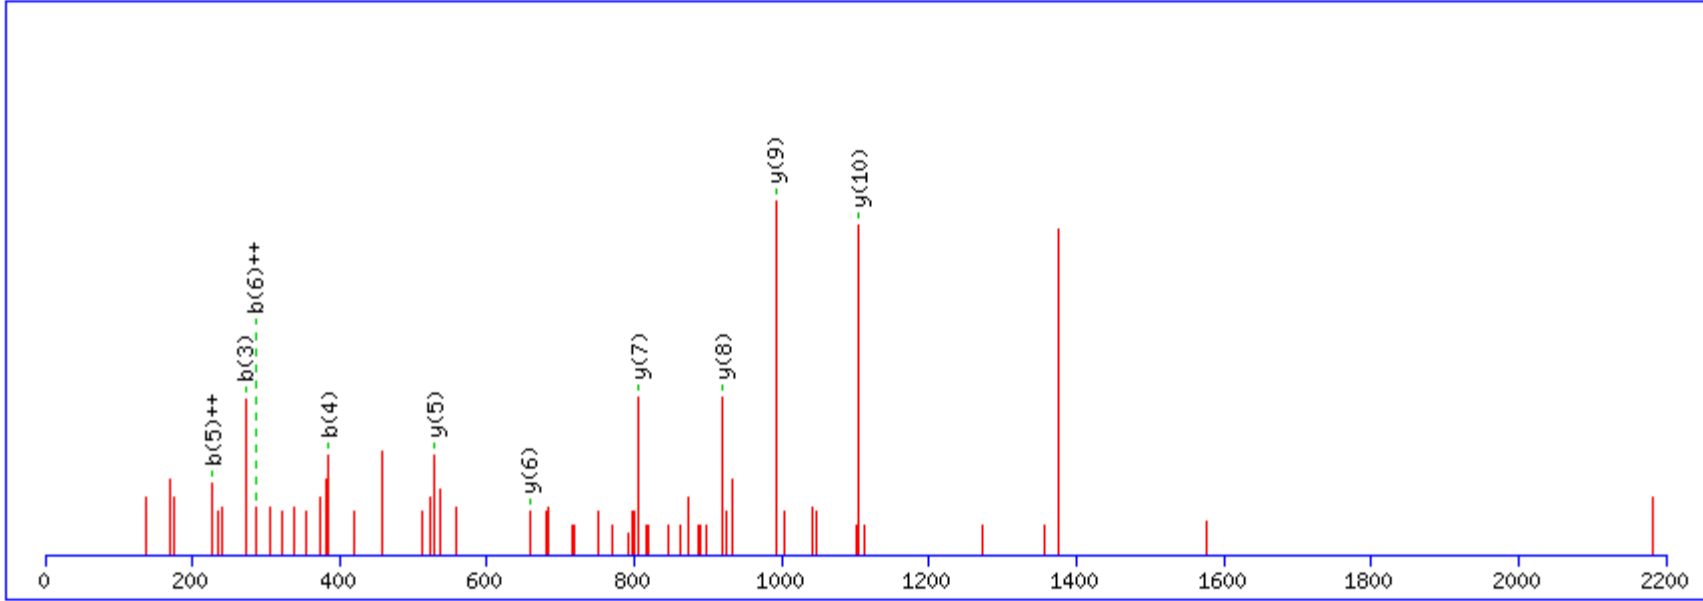

Monoisotopic mass of neutral peptide Mr(calc): 1374.714325

Fixed modifications: Carbamidomethyl (C) (apply to specified residues or termini only)

Ions Score: 31 Expect: 0.012

Matches : 10/110 fragment ions using 22 most intense peaks [\(help\)](#)

| #  | b                 | b <sup>++</sup>   | b <sup>0</sup> | b <sup>0++</sup> | Seq. | y                  | y <sup>++</sup> | y <sup>*</sup> | y <sup>*++</sup> | y <sup>0</sup> | y <sup>0++</sup> | #  |
|----|-------------------|-------------------|----------------|------------------|------|--------------------|-----------------|----------------|------------------|----------------|------------------|----|
| 1  | 116.034219        | 58.520748         | 98.023654      | 49.515465        | D    |                    |                 |                |                  |                |                  | 13 |
| 2  | 173.055683        | 87.031479         | 155.045118     | 78.026197        | G    | 1260.694664        | 630.850970      | 1243.668115    | 622.337696       | 1242.684099    | 621.845687       | 12 |
| 3  | <b>272.124097</b> | 136.565687        | 254.113532     | 127.560404       | V    | 1203.673200        | 602.340238      | 1186.646651    | 593.826964       | 1185.662635    | 593.334955       | 11 |
| 4  | <b>385.208161</b> | 193.107719        | 367.197596     | 184.102436       | L    | <b>1104.604786</b> | 552.806031      | 1087.578237    | 544.292757       | 1086.594221    | 543.800748       | 10 |
| 5  | 456.245275        | <b>228.626276</b> | 438.234710     | 219.620993       | A    | <b>991.520722</b>  | 496.263999      | 974.494173     | 487.750724       | 973.510157     | 487.258716       | 9  |
| 6  | 571.272218        | <b>286.139747</b> | 553.261653     | 277.134465       | D    | <b>920.483608</b>  | 460.745442      | 903.457059     | 452.232167       | 902.473043     | 451.740159       | 8  |
| 7  | 718.340632        | 359.673954        | 700.330067     | 350.668672       | F    | <b>805.456665</b>  | 403.231970      | 788.430116     | 394.718696       | 787.446100     | 394.226688       | 7  |
| 8  | 847.383225        | 424.195251        | 829.372660     | 415.189968       | E    | <b>658.388251</b>  | 329.697764      | 641.361702     | 321.184489       | 640.377686     | 320.692481       | 6  |
| 9  | 918.420339        | 459.713808        | 900.409774     | 450.708525       | A    | <b>529.345658</b>  | 265.176467      | 512.319109     | 256.663192       |                |                  | 5  |
| 10 | 975.441803        | 488.224540        | 957.431238     | 479.219257       | G    | 458.308544         | 229.657910      | 441.281995     | 221.144635       |                |                  | 4  |
| 11 | 1088.525867       | 544.766572        | 1070.515302    | 535.761289       | L    | 401.287080         | 201.147178      | 384.260531     | 192.633903       |                |                  | 3  |
| 12 | 1201.609931       | 601.308604        | 1183.599366    | 592.303321       | L    | 288.203016         | 144.605146      | 271.176467     | 136.091871       |                |                  | 2  |
| 13 |                   |                   |                |                  | R    | 175.118952         | 88.063114       | 158.092403     | 79.549839        |                |                  | 1  |

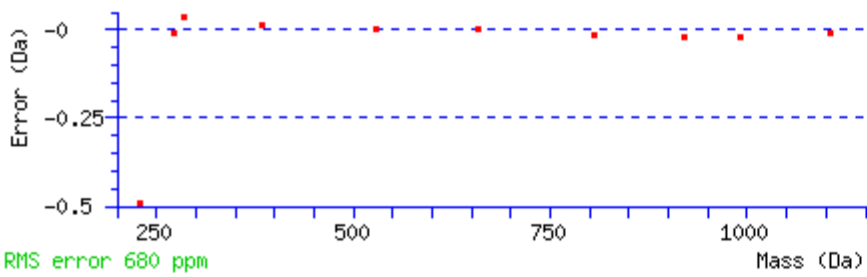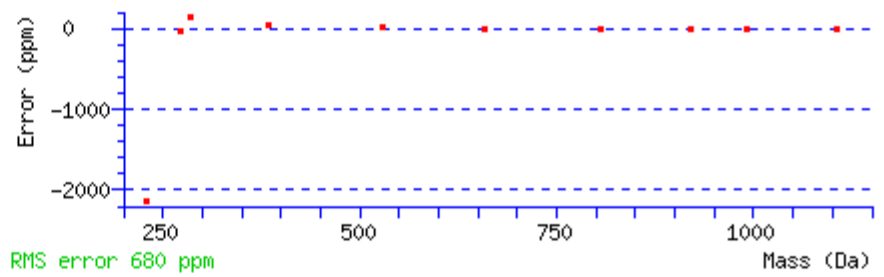

NCBI BLAST search of [DGVLADFEAGLLR](#)

(Parameters: blastp, nr protein database, expect=20000, no filter, PAM30)

Other BLAST [web gateways](#)

## All matches to this query

| Score | Mr(calc):   | Delta     | Sequence                        |
|-------|-------------|-----------|---------------------------------|
| 31.2  | 1374.714325 | -0.009357 | <a href="#">DGVLADFEAGLLR</a>   |
| 10.0  | 1374.693207 | 0.011761  | <a href="#">FPAPPAPPAPPPR</a>   |
| 5.7   | 1374.714325 | -0.009357 | <a href="#">LTGPSGLSSYHLK</a>   |
| 5.1   | 1374.711624 | -0.006656 | <a href="#">LSREGSSHHLPR</a>    |
| 3.6   | 1374.714325 | -0.009357 | <a href="#">LDAPPPPAAPLPR</a>   |
| 3.4   | 1374.692520 | 0.012448  | <a href="#">VTALQEECRAAK</a>    |
| 3.3   | 1374.700424 | 0.004544  | <a href="#">KGAGGGGPPQAPPPR</a> |
| 3.3   | 1374.700424 | 0.004544  | <a href="#">KGAGGGGPPQAPPPR</a> |
| 3.3   | 1374.700424 | 0.004544  | <a href="#">KGAGGGGPPQAPPPR</a> |
| 2.4   | 1374.714325 | -0.009357 | <a href="#">LDAPPPPAAPLPR</a>   |

# Mascot Search Results

## Peptide View

MS/MS Fragmentation of **NSPGSQVASNPR**

Found in **XRN2\_HUMAN**, 5'-3' exoribonuclease 2 OS=Homo sapiens GN=XRN2 PE=1 SV=1

Match to Query 536245: 1212.583448 from(607.299000,2+) rtinseconds(884) index(241616)

Title: Locus:1.1.1.776.31

Data file C:\Program Files (x86)\Matrix Science\Mascot Daemon\mgf\3 TFD - Epitel - R2\mascot\_daemon\_merge.mgf

Click mouse within plot area to zoom in by factor of two about that point

Or, Plot from  to  Da

Label all possible matches  Label matches used for scoring

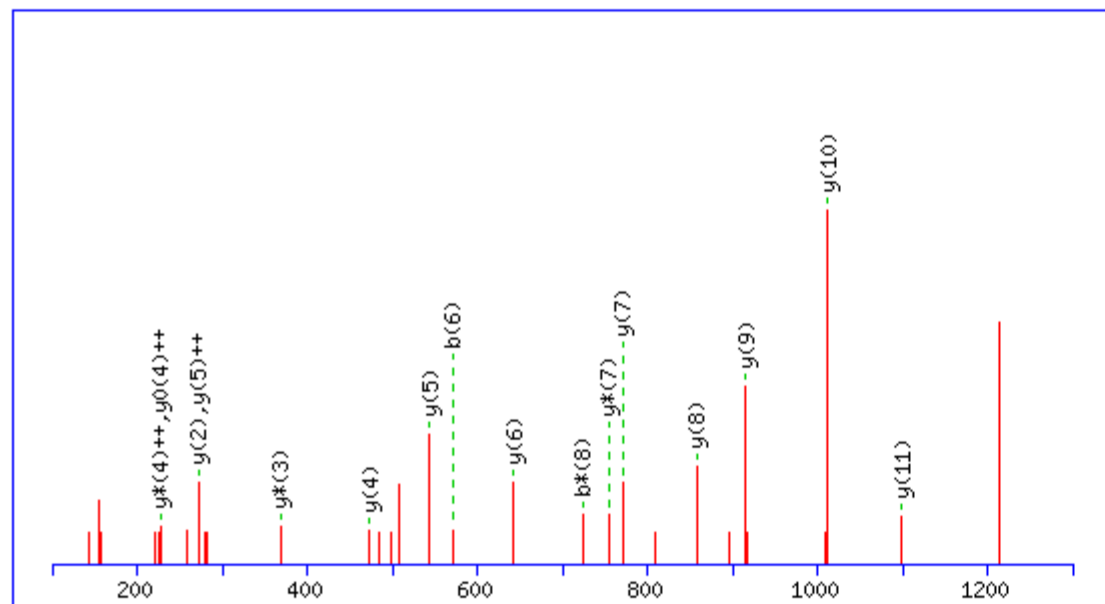

Monoisotopic mass of neutral peptide Mr(calc): 1212.584702

Fixed modifications: Carbamidomethyl (C) (apply to specified residues or termini only)

Ions Score: 78 Expect: 9.6e-008

Matches : 16/124 fragment ions using 18 most intense peaks [\(help\)](#)

| #  | b                 | b <sup>++</sup> | b <sup>*</sup>    | b <sup>*++</sup> | b <sup>0</sup> | b <sup>0++</sup> | Seq. | y                  | y <sup>++</sup>   | y <sup>*</sup>    | y <sup>*++</sup>  | y <sup>0</sup> | y <sup>0++</sup>  | #  |
|----|-------------------|-----------------|-------------------|------------------|----------------|------------------|------|--------------------|-------------------|-------------------|-------------------|----------------|-------------------|----|
| 1  | 115.050203        | 58.028740       | 98.023654         | 49.515465        |                |                  | N    |                    |                   |                   |                   |                |                   | 12 |
| 2  | 202.082231        | 101.544753      | 185.055682        | 93.031479        | 184.071666     | 92.539471        | S    | <b>1099.549061</b> | 550.278168        | 1082.522512       | 541.764894        | 1081.538496    | 541.272886        | 11 |
| 3  | 299.134995        | 150.071135      | 282.108446        | 141.557861       | 281.124430     | 141.065853       | P    | <b>1012.517033</b> | 506.762154        | 995.490484        | 498.248880        | 994.506468     | 497.756872        | 10 |
| 4  | 356.156459        | 178.581867      | 339.129910        | 170.068593       | 338.145894     | 169.576585       | G    | <b>915.464269</b>  | 458.235773        | 898.437720        | 449.722498        | 897.453704     | 449.230490        | 9  |
| 5  | 443.188487        | 222.097881      | 426.161938        | 213.584607       | 425.177922     | 213.092599       | S    | <b>858.442805</b>  | 429.725040        | 841.416256        | 421.211766        | 840.432240     | 420.719758        | 8  |
| 6  | <b>571.247065</b> | 286.127171      | 554.220516        | 277.613896       | 553.236500     | 277.121888       | Q    | <b>771.410777</b>  | 386.209026        | <b>754.384228</b> | 377.695752        | 753.400212     | 377.203744        | 7  |
| 7  | 670.315479        | 335.661378      | 653.288930        | 327.148103       | 652.304914     | 326.656095       | V    | <b>643.352199</b>  | 322.179737        | 626.325650        | 313.666463        | 625.341634     | 313.174455        | 6  |
| 8  | 741.352593        | 371.179935      | <b>724.326044</b> | 362.666660       | 723.342028     | 362.174652       | A    | <b>544.283785</b>  | <b>272.645531</b> | 527.257236        | 264.132256        | 526.273220     | 263.640248        | 5  |
| 9  | 828.384621        | 414.695948      | 811.358072        | 406.182674       | 810.374056     | 405.690666       | S    | <b>473.246671</b>  | 237.126973        | 456.220122        | <b>228.613699</b> | 455.236106     | <b>228.121691</b> | 4  |
| 10 | 942.427548        | 471.717412      | 925.400999        | 463.204137       | 924.416983     | 462.712129       | N    | 386.214643         | 193.610959        | <b>369.188094</b> | 185.097685        |                |                   | 3  |
| 11 | 1039.480312       | 520.243794      | 1022.453763       | 511.730519       | 1021.469747    | 511.238511       | P    | <b>272.171716</b>  | 136.589496        | 255.145167        | 128.076221        |                |                   | 2  |
| 12 |                   |                 |                   |                  |                |                  | R    | 175.118952         | 88.063114         | 158.092403        | 79.549839         |                |                   | 1  |

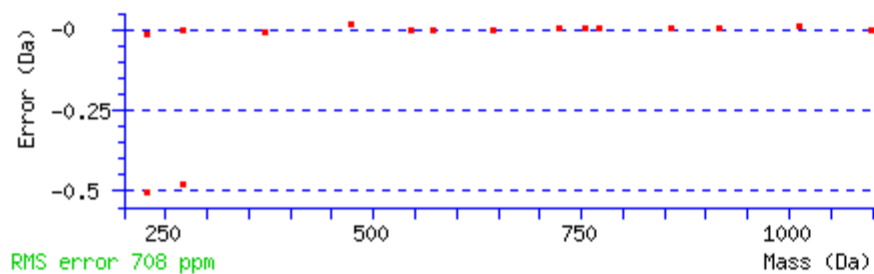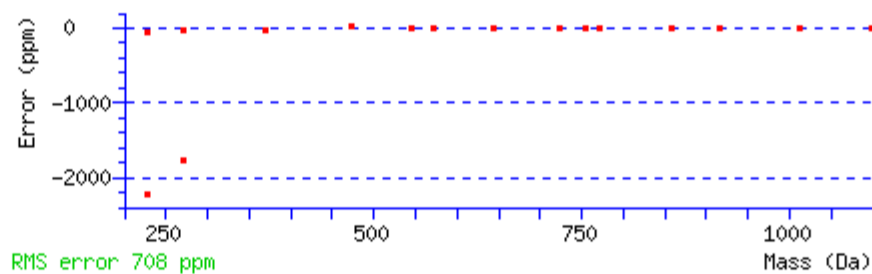

NCBI BLAST search of **NSPGSQVASNPR**

(Parameters: blastp, nr protein database, expect=20000, no filter, PAM30)

Other BLAST [web gateways](#)

All matches to this query

| Score | Mr(calc):   | Delta     | Sequence                     |
|-------|-------------|-----------|------------------------------|
| 77.5  | 1212.584702 | -0.001254 | <a href="#">NSPGSQVASNPR</a> |
| 2.7   | 1212.580872 | 0.002576  | <a href="#">HPGVAEVKTEM</a>  |

# MASCOT SEARCH RESULTS

## Peptide View

MS/MS Fragmentation of **VPFLVAETPR**

Found in **AAPKI\_HUMAN**, 5'-AMP-activated protein kinase catalytic subunit alpha-1 OS=Homo sapiens GN=PRKAA1 PE=1 SV=4

Match to Query 22785: 1127.636288 from(564.825420,2+) rtinseconds(2614) index(34377)

Title: Locus:1.1.1.2418.23

Data file 2011-11-14 - TFD - EP 8-3.mgf

Click mouse within plot area to zoom in by factor of two about that point

Or, Plot from  to  Da

Label all possible matches  Label matches used for scoring

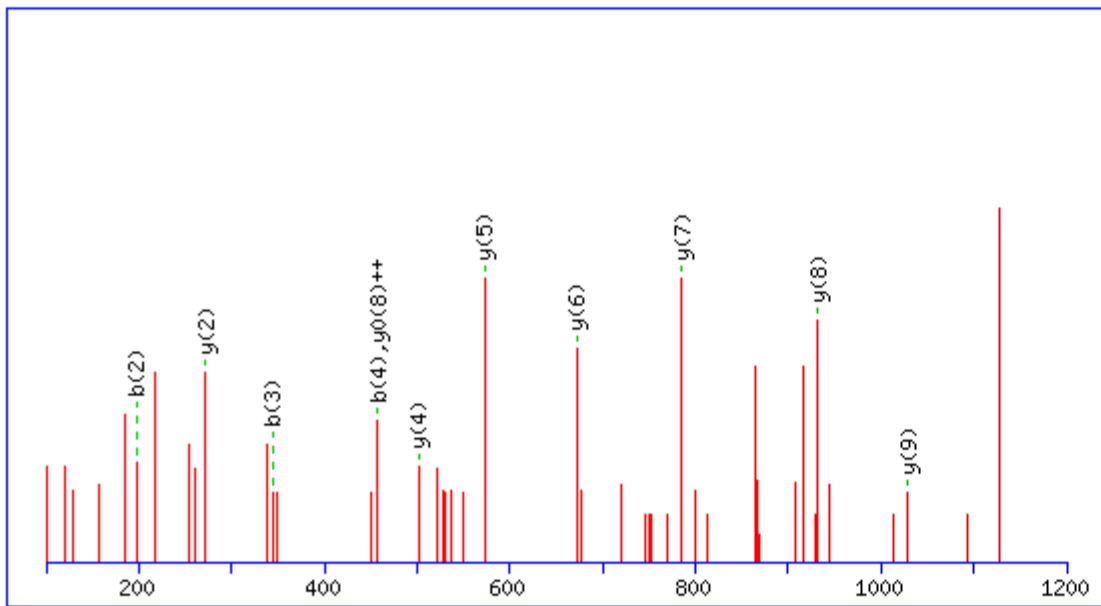

Monoisotopic mass of neutral peptide Mr(calc): 1127.633896

Fixed modifications: Propionamide (C) (apply to specified residues or termini only)

Ions Score: 46 Expect: 0.00022

Matches : 11/74 fragment ions using 20 most intense peaks [\(help\)](#)

| #  | b          | b <sup>++</sup> | b <sup>0</sup> | b <sup>0++</sup> | Seq. | y           | y <sup>++</sup> | y <sup>*</sup> | y <sup>*++</sup> | y <sup>0</sup> | y <sup>0++</sup> | #  |
|----|------------|-----------------|----------------|------------------|------|-------------|-----------------|----------------|------------------|----------------|------------------|----|
| 1  | 100.075690 | 50.541483       |                |                  | V    |             |                 |                |                  |                |                  | 10 |
| 2  | 197.128454 | 99.067865       |                |                  | P    | 1029.572758 | 515.290017      | 1012.546209    | 506.776743       | 1011.562193    | 506.284735       | 9  |
| 3  | 344.196868 | 172.602072      |                |                  | F    | 932.519994  | 466.763635      | 915.493445     | 458.250361       | 914.509429     | 457.758353       | 8  |
| 4  | 457.280932 | 229.144104      |                |                  | L    | 785.451580  | 393.229428      | 768.425031     | 384.716154       | 767.441015     | 384.224146       | 7  |
| 5  | 556.349346 | 278.678311      |                |                  | V    | 672.367516  | 336.687396      | 655.340967     | 328.174122       | 654.356951     | 327.682114       | 6  |
| 6  | 627.386460 | 314.196868      |                |                  | A    | 573.299102  | 287.153189      | 556.272553     | 278.639915       | 555.288537     | 278.147907       | 5  |
| 7  | 756.429053 | 378.718165      | 738.418488     | 369.712882       | E    | 502.261988  | 251.634632      | 485.235439     | 243.121358       | 484.251423     | 242.629350       | 4  |
| 8  | 857.476732 | 429.242004      | 839.466167     | 420.236721       | T    | 373.219395  | 187.113336      | 356.192846     | 178.600061       | 355.208830     | 178.108053       | 3  |
| 9  | 954.529496 | 477.768386      | 936.518931     | 468.763104       | P    | 272.171716  | 136.589496      | 255.145167     | 128.076222       |                |                  | 2  |
| 10 |            |                 |                |                  | R    | 175.118952  | 88.063114       | 158.092403     | 79.549840        |                |                  | 1  |

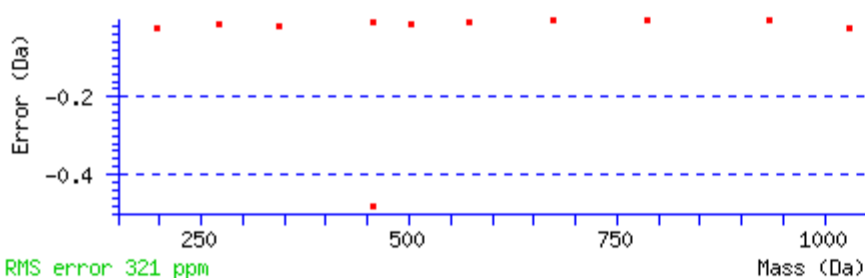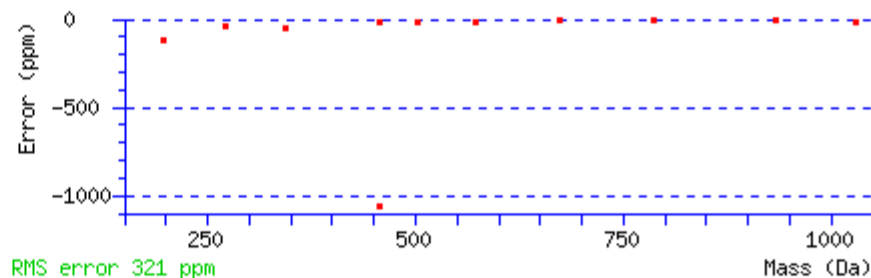

NCBI BLAST search of **VPFLVAETPR**

(Parameters: blastp, nr protein database, expect=20000, no filter, PAM30)

Other BLAST [web gateways](#)

## All matches to this query

| Score | Mr(calc):   | Delta    | Sequence                   |
|-------|-------------|----------|----------------------------|
| 46.1  | 1127.633896 | 0.002392 | <a href="#">VPFLVAETPR</a> |

Mascot: <http://www.matrixscience.com/>

# **MASCOT** Mascot Search Results

## Peptide View

MS/MS Fragmentation of **IESPEEISLLPK**

Found in **MTHFS\_HUMAN**, 5-formyltetrahydrofolate cyclo-ligase OS=Homo sapiens GN=MTHFS PE=1 SV=2

Match to Query 37583: 1353.735908 from(677.875230,2+) rtinseconds(2870) index(34924)

Title: Locus:1.1.1.2677.36

Data file 2011-11-12 - TFD - EP 5-5.mgf

Click mouse within plot area to zoom in by factor of two about that point

Or, Plot from  to  Da

Label all possible matches  Label matches used for scoring

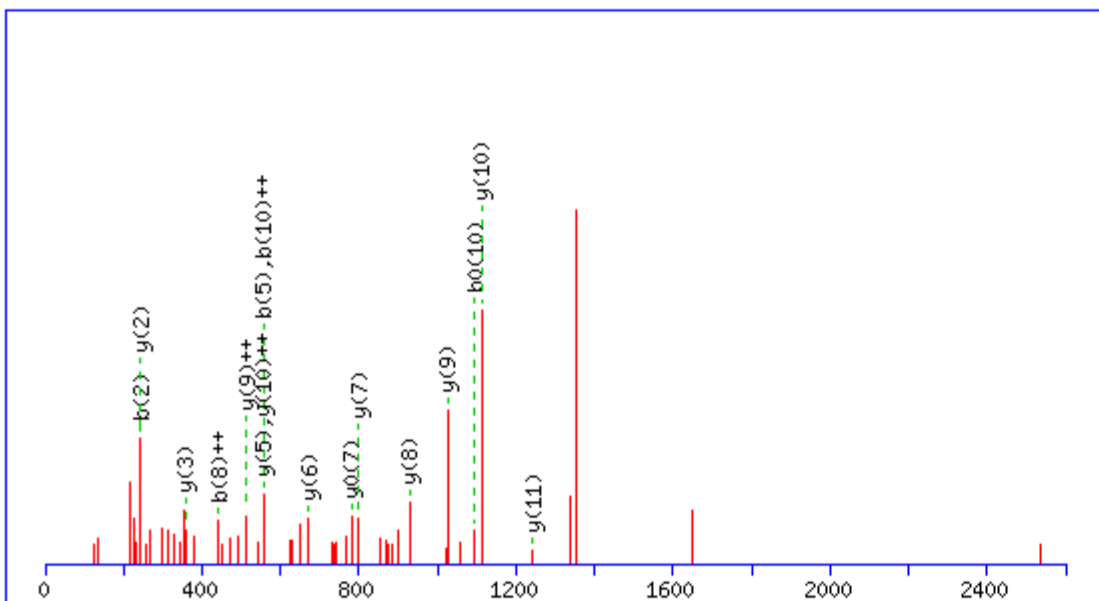

Monoisotopic mass of neutral peptide Mr(calc): 1353.739105

Fixed modifications: Propionamide (C) (apply to specified residues or termini only)

Ions Score: 73 Expect: 4.2e-007

Matches : 17/100 fragment ions using 23 most intense peaks [\(help\)](#)

| #  | b                 | b <sup>++</sup>   | b <sup>0</sup>     | b <sup>0++</sup> | Seq. | y                  | y <sup>++</sup>   | y <sup>*</sup> | y <sup>***</sup> | y <sup>0</sup>    | y <sup>0++</sup> | #  |
|----|-------------------|-------------------|--------------------|------------------|------|--------------------|-------------------|----------------|------------------|-------------------|------------------|----|
| 1  | 114.091340        | 57.549308         |                    |                  | I    |                    |                   |                |                  |                   |                  | 12 |
| 2  | <b>243.133933</b> | 122.070605        | 225.123368         | 113.065322       | E    | <b>1241.662359</b> | 621.334818        | 1224.635810    | 612.821543       | 1223.651794       | 612.329535       | 11 |
| 3  | 330.165961        | 165.586618        | 312.155396         | 156.581336       | S    | <b>1112.619766</b> | <b>556.813521</b> | 1095.593217    | 548.300247       | 1094.609201       | 547.808239       | 10 |
| 4  | 427.218725        | 214.113001        | 409.208160         | 205.107718       | P    | <b>1025.587738</b> | <b>513.297507</b> | 1008.561189    | 504.784233       | 1007.577173       | 504.292225       | 9  |
| 5  | <b>556.261318</b> | 278.634297        | 538.250753         | 269.629015       | E    | <b>928.534974</b>  | 464.771125        | 911.508425     | 456.257851       | 910.524409        | 455.765843       | 8  |
| 6  | 685.303911        | 343.155594        | 667.293346         | 334.150311       | E    | <b>799.492381</b>  | 400.249829        | 782.465832     | 391.736554       | <b>781.481816</b> | 391.244546       | 7  |
| 7  | 798.387975        | 399.697626        | 780.377410         | 390.692343       | I    | <b>670.449788</b>  | 335.728532        | 653.423239     | 327.215258       | 652.439223        | 326.723250       | 6  |
| 8  | 885.420003        | <b>443.213640</b> | 867.409438         | 434.208357       | S    | <b>557.365724</b>  | 279.186500        | 540.339175     | 270.673226       | 539.355159        | 270.181218       | 5  |
| 9  | 998.504067        | 499.755672        | 980.493502         | 490.750389       | L    | 470.333696         | 235.670486        | 453.307147     | 227.157211       |                   |                  | 4  |
| 10 | 1111.588131       | <b>556.297704</b> | <b>1093.577566</b> | 547.292421       | L    | <b>357.249632</b>  | 179.128454        | 340.223083     | 170.615179       |                   |                  | 3  |
| 11 | 1208.640895       | 604.824086        | 1190.630330        | 595.818803       | P    | <b>244.165568</b>  | 122.586422        | 227.139019     | 114.073148       |                   |                  | 2  |
| 12 |                   |                   |                    |                  | K    | 147.112804         | 74.060040         | 130.086255     | 65.546765        |                   |                  | 1  |

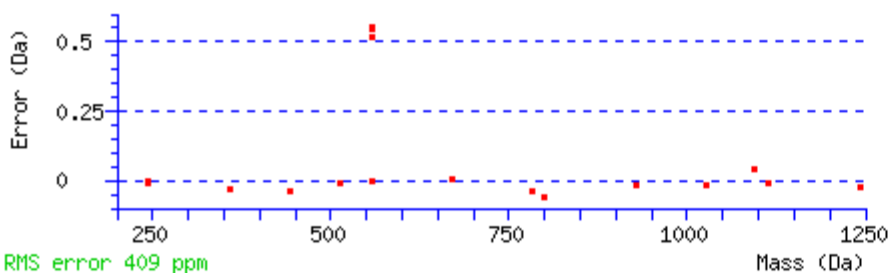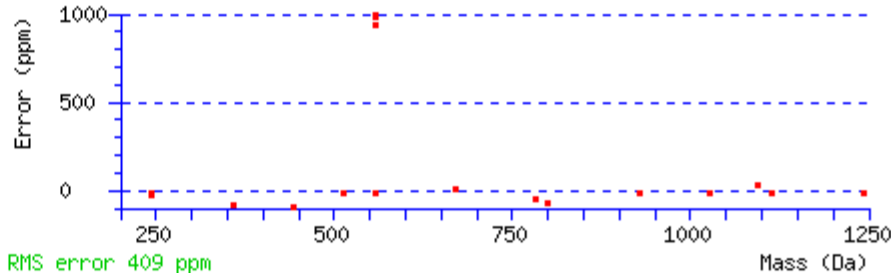

NCBI BLAST search of **IESPEEISLLPK**

(Parameters: blastp, nr protein database, expect=20000, no filter, PAM30)

Other BLAST [web gateways](#)

## All matches to this query

| Score | Mr(calc):   | Delta     | Sequence                     |
|-------|-------------|-----------|------------------------------|
| 73.3  | 1353.739105 | -0.003197 | <a href="#">IESPEEISLLPK</a> |
| 10.2  | 1353.736435 | -0.000527 | <a href="#">LEQVRPQELSR</a>  |
| 7.0   | 1353.743820 | -0.007912 | <a href="#">LQMILNEIQPR</a>  |
| 6.6   | 1353.725220 | 0.010688  | <a href="#">NELQLVDLPTGR</a> |
| 3.6   | 1353.725220 | 0.010688  | <a href="#">TTQEPLARDPVK</a> |
| 3.3   | 1353.736435 | -0.000527 | <a href="#">SRPKEPSPSLTR</a> |
| 3.3   | 1353.736450 | -0.000542 | <a href="#">LQEAGVSIPPRR</a> |
| 2.6   | 1353.747665 | -0.011757 | <a href="#">IEPQRPARSLR</a>  |
| 2.3   | 1353.732590 | 0.003318  | <a href="#">LLKMNGPEDLPK</a> |
| 0.6   | 1353.740479 | -0.004571 | <a href="#">LPTTGVLVYRR</a>  |

**Peptide View**

MS/MS Fragmentation of **GLALDLEDGNFLK**

Found in **NTSD1\_HUMAN**, 5'-nucleotidase domain-containing protein 1 OS=Homo sapiens GN=NTSDC1 PE=1 SV=1

Match to Query 35315: 1403.735768 from(702.875160,2+) rtinseconds(3457) index(50483)

Title: Locus:1.1.1.2804.17

Data file 2011-11-10 - TFD - EP 4-3.mgf

Click mouse within plot area to zoom in by factor of two about that point

Or, Plot from  to  Da

Label all possible matches  Label matches used for scoring

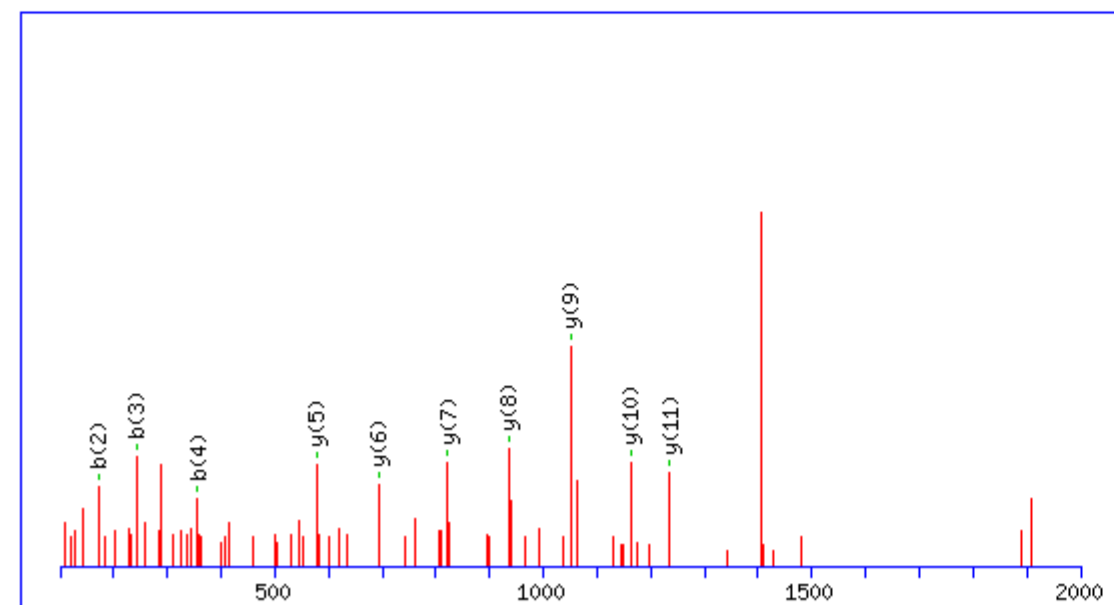

Monoisotopic mass of neutral peptide Mr(calcd): 1403.729630

Fixed modifications: Propionamide (C) (apply to specified residues or termini only)

Ions Score: 57 Expect: 2.6e-005

Matches : 10/108 fragment ions using 13 most intense peaks [\(help\)](#)

| #  | b                 | b <sup>++</sup> | b <sup>*</sup> | b <sup>*++</sup> | b <sup>0</sup> | b <sup>0++</sup> | Seq.     | y                  | y <sup>++</sup> | y <sup>*</sup> | y <sup>*++</sup> | y <sup>0</sup> | y <sup>0++</sup> | #  |
|----|-------------------|-----------------|----------------|------------------|----------------|------------------|----------|--------------------|-----------------|----------------|------------------|----------------|------------------|----|
| 1  | 58.028740         | 29.518008       |                |                  |                |                  | <b>G</b> |                    |                 |                |                  |                |                  | 13 |
| 2  | <b>171.112804</b> | 86.060040       |                |                  |                |                  | <b>L</b> | 1347.715458        | 674.361367      | 1330.688909    | 665.848093       | 1329.704893    | 665.356085       | 12 |
| 3  | <b>242.149918</b> | 121.578597      |                |                  |                |                  | <b>A</b> | <b>1234.631394</b> | 617.819335      | 1217.604845    | 609.306061       | 1216.620829    | 608.814053       | 11 |
| 4  | <b>355.233982</b> | 178.120629      |                |                  |                |                  | <b>L</b> | <b>1163.594280</b> | 582.300778      | 1146.567731    | 573.787504       | 1145.583715    | 573.295496       | 10 |
| 5  | 470.260925        | 235.634100      |                |                  | 452.250360     | 226.628818       | <b>D</b> | <b>1050.510216</b> | 525.758746      | 1033.483667    | 517.245472       | 1032.499651    | 516.753464       | 9  |
| 6  | 583.344989        | 292.176133      |                |                  | 565.334424     | 283.170850       | <b>L</b> | <b>935.483273</b>  | 468.245275      | 918.456724     | 459.732000       | 917.472708     | 459.239992       | 8  |
| 7  | 712.387582        | 356.697429      |                |                  | 694.377017     | 347.692147       | <b>E</b> | <b>822.399209</b>  | 411.703243      | 805.372660     | 403.189968       | 804.388644     | 402.697960       | 7  |
| 8  | 827.414525        | 414.210901      |                |                  | 809.403960     | 405.205618       | <b>D</b> | <b>693.356616</b>  | 347.181946      | 676.330067     | 338.668672       | 675.346051     | 338.176664       | 6  |
| 9  | 884.435989        | 442.721633      |                |                  | 866.425424     | 433.716350       | <b>G</b> | <b>578.329673</b>  | 289.668475      | 561.303124     | 281.155200       |                |                  | 5  |
| 10 | 998.478916        | 499.743096      | 981.452367     | 491.229822       | 980.468351     | 490.737814       | <b>N</b> | 521.308209         | 261.157743      | 504.281660     | 252.644468       |                |                  | 4  |
| 11 | 1145.547330       | 573.277303      | 1128.520781    | 564.764029       | 1127.536765    | 564.272021       | <b>F</b> | 407.265282         | 204.136279      | 390.238733     | 195.623004       |                |                  | 3  |
| 12 | 1258.631394       | 629.819335      | 1241.604845    | 621.306061       | 1240.620829    | 620.814053       | <b>L</b> | 260.196868         | 130.602072      | 243.170319     | 122.088797       |                |                  | 2  |
| 13 |                   |                 |                |                  |                |                  | <b>K</b> | 147.112804         | 74.060040       | 130.086255     | 65.546765        |                |                  | 1  |

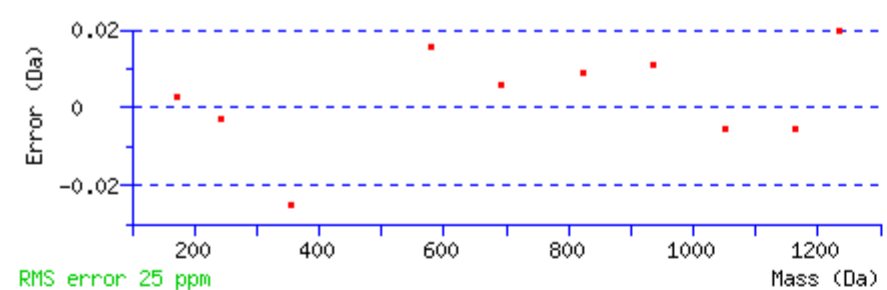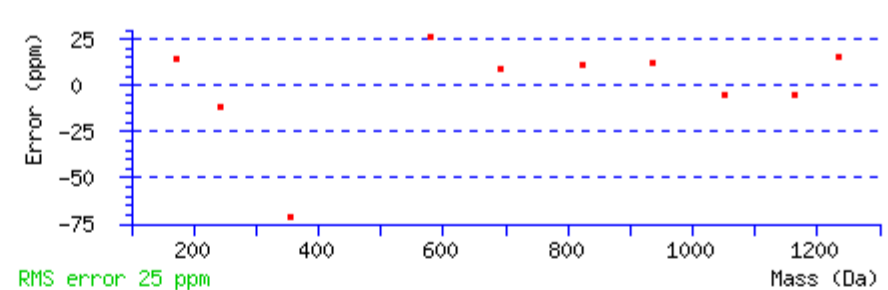

NCBI BLAST search of **GLALDLEDGNFLK**

(Parameters: blastp, nr protein database, expect=20000, no filter, PAM30)

Other BLAST [web gateways](#)

**All matches to this query**

| Score | Mr(calcd):  | Delta     | Sequence                       |
|-------|-------------|-----------|--------------------------------|
| 56.8  | 1403.729630 | 0.006138  | <a href="#">GLALDLEDGNFLK</a>  |
| 13.3  | 1403.723114 | 0.012654  | <a href="#">VAAINGCGIGPFSK</a> |
| 8.3   | 1403.729645 | 0.006123  | <a href="#">IQIDEDGKVFVK</a>   |
| 1.3   | 1403.734329 | 0.001439  | <a href="#">IQLRSQCATWK</a>    |
| 0.5   | 1403.740875 | -0.005107 | <a href="#">QPIRGSDVLFK</a>    |



# MASCOT SCIENCE Mascot Search Results

## Peptide View

### MS/MS Fragmentation of **FLCFGSEGGTYIYIK**

Found in **RO60\_HUMAN**, 60 kDa SS-A/Ro ribonucleoprotein OS=Homo sapiens GN=TROVE2 PE=1 SV=2

Match to Query 52354: 1654.780488 from(828.397520,2+) rtinseconds(3217) index(46091)

Title: Locus:1.1.1.2595.41

Data file 2011-11-12 - TFD - EP 6-3.mgf

Click mouse within plot area to zoom in by factor of two about that point

Or, Plot from  to  Da

Label all possible matches  Label matches used for scoring

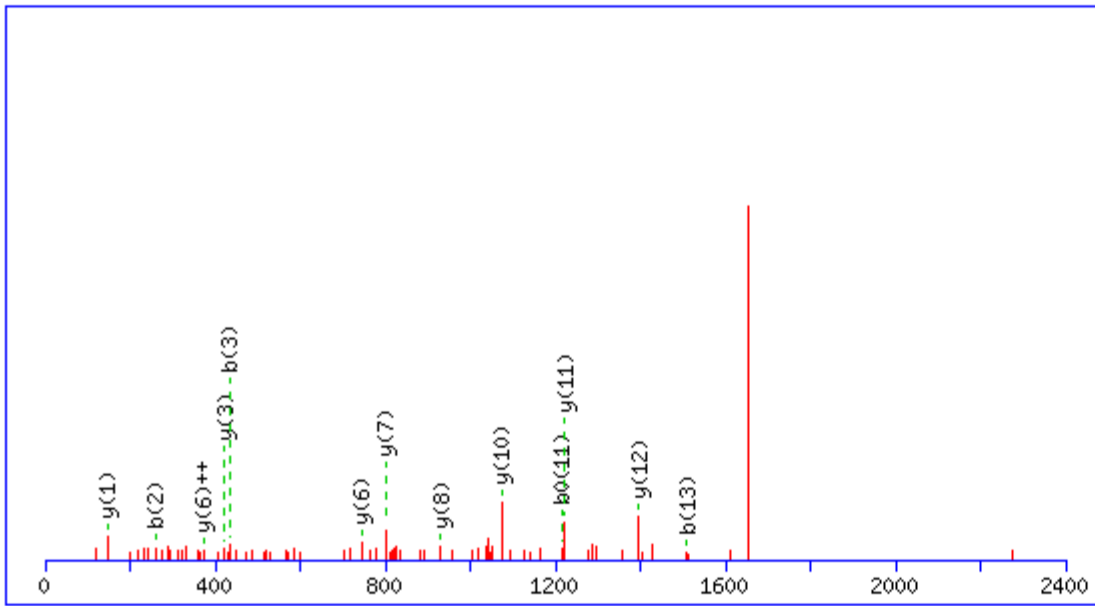

Monoisotopic mass of neutral peptide  $M_r(\text{calc})$ : 1654.770126

Fixed modifications: Propionamide (C) (apply to specified residues or termini only)

Ions Score: 38 Expect: 0.0014

Matches : 13/112 fragment ions using 29 most intense peaks [\(help\)](#)

| #  | b                  | b <sup>++</sup> | b <sup>0</sup>     | b <sup>0++</sup> | Seq. | y                  | y <sup>++</sup>   | y <sup>*</sup> | y <sup>*++</sup> | y <sup>0</sup> | y <sup>0++</sup> | #  |
|----|--------------------|-----------------|--------------------|------------------|------|--------------------|-------------------|----------------|------------------|----------------|------------------|----|
| 1  | 148.075690         | 74.541483       |                    |                  | F    |                    |                   |                |                  |                |                  | 14 |
| 2  | <b>261.159754</b>  | 131.083515      |                    |                  | L    | 1508.708995        | 754.858136        | 1491.682446    | 746.344861       | 1490.698430    | 745.852853       | 13 |
| 3  | <b>435.206053</b>  | 218.106664      |                    |                  | C    | <b>1395.624931</b> | 698.316104        | 1378.598382    | 689.802829       | 1377.614366    | 689.310821       | 12 |
| 4  | 582.274467         | 291.640872      |                    |                  | F    | <b>1221.578632</b> | 611.292954        | 1204.552083    | 602.779680       | 1203.568067    | 602.287671       | 11 |
| 5  | 639.295931         | 320.151604      |                    |                  | G    | <b>1074.510218</b> | 537.758747        | 1057.483669    | 529.245473       | 1056.499653    | 528.753465       | 10 |
| 6  | 726.327959         | 363.667618      | 708.317394         | 354.662335       | S    | 1017.488754        | 509.248015        | 1000.462205    | 500.734741       | 999.478189     | 500.242733       | 9  |
| 7  | 855.370552         | 428.188914      | 837.359987         | 419.183631       | E    | <b>930.456726</b>  | 465.732001        | 913.430177     | 457.218727       | 912.446161     | 456.726719       | 8  |
| 8  | 912.392016         | 456.699646      | 894.381451         | 447.694364       | G    | <b>801.414133</b>  | 401.210705        | 784.387584     | 392.697430       | 783.403568     | 392.205422       | 7  |
| 9  | 969.413480         | 485.210378      | 951.402915         | 476.205096       | G    | <b>744.392669</b>  | <b>372.699973</b> | 727.366120     | 364.186698       | 726.382104     | 363.694690       | 6  |
| 10 | 1070.461159        | 535.734218      | 1052.450594        | 526.728935       | T    | 687.371205         | 344.189241        | 670.344656     | 335.675966       | 669.360640     | 335.183958       | 5  |
| 11 | 1233.524488        | 617.265882      | <b>1215.513923</b> | 608.260600       | Y    | 586.323526         | 293.665401        | 569.296977     | 285.152127       |                |                  | 4  |
| 12 | 1396.587817        | 698.797547      | 1378.577252        | 689.792264       | Y    | <b>423.260197</b>  | 212.133736        | 406.233648     | 203.620462       |                |                  | 3  |
| 13 | <b>1509.671881</b> | 755.339579      | 1491.661316        | 746.334296       | I    | 260.196868         | 130.602072        | 243.170319     | 122.088797       |                |                  | 2  |
| 14 |                    |                 |                    |                  | K    | <b>147.112804</b>  | 74.060040         | 130.086255     | 65.546765        |                |                  | 1  |

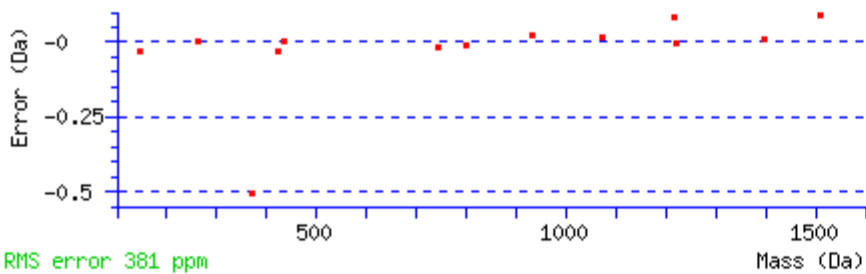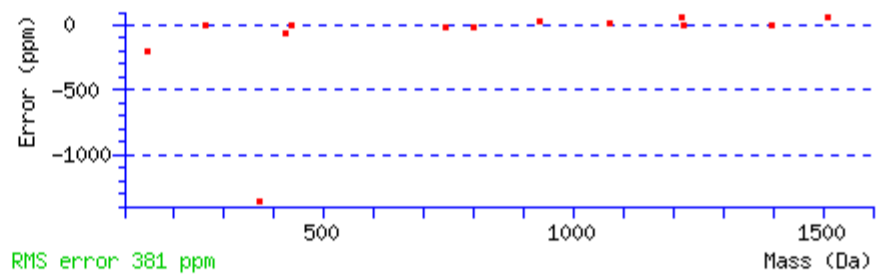

### NCBI BLAST search of **FLCFGSEGGTYIYIK**

(Parameters: blastp, nr protein database, expect=20000, no filter, PAM30)

Other BLAST [web gateways](#)

### All matches to this query

| Score | $M_r(\text{calc})$ : | Delta    | Sequence                        |
|-------|----------------------|----------|---------------------------------|
| 38.1  | 1654.770126          | 0.010362 | <a href="#">FLCFGSEGGTYIYIK</a> |

Mascot: <http://www.matrixscience.com/>

# **MASCOT** Mascot Search Results

## Peptide View

MS/MS Fragmentation of **YSLDPENPTK**

Found in **RL17\_HUMAN**, 60S ribosomal protein L17 OS=Homo sapiens GN=RPL17 PE=1 SV=3

Match to Query 19247: 1162.554428 from(582.284490,2+) rtinseconds(1761) index(18188)

Title: Locus:1.1.1.1053.29

Data file 2012-01-27 - TFD - Epitel - IEC - 10ul - 2.mgf

Click mouse within plot area to zoom in by factor of two about that point

Or, Plot from  to  Da

Label all possible matches  Label matches used for scoring

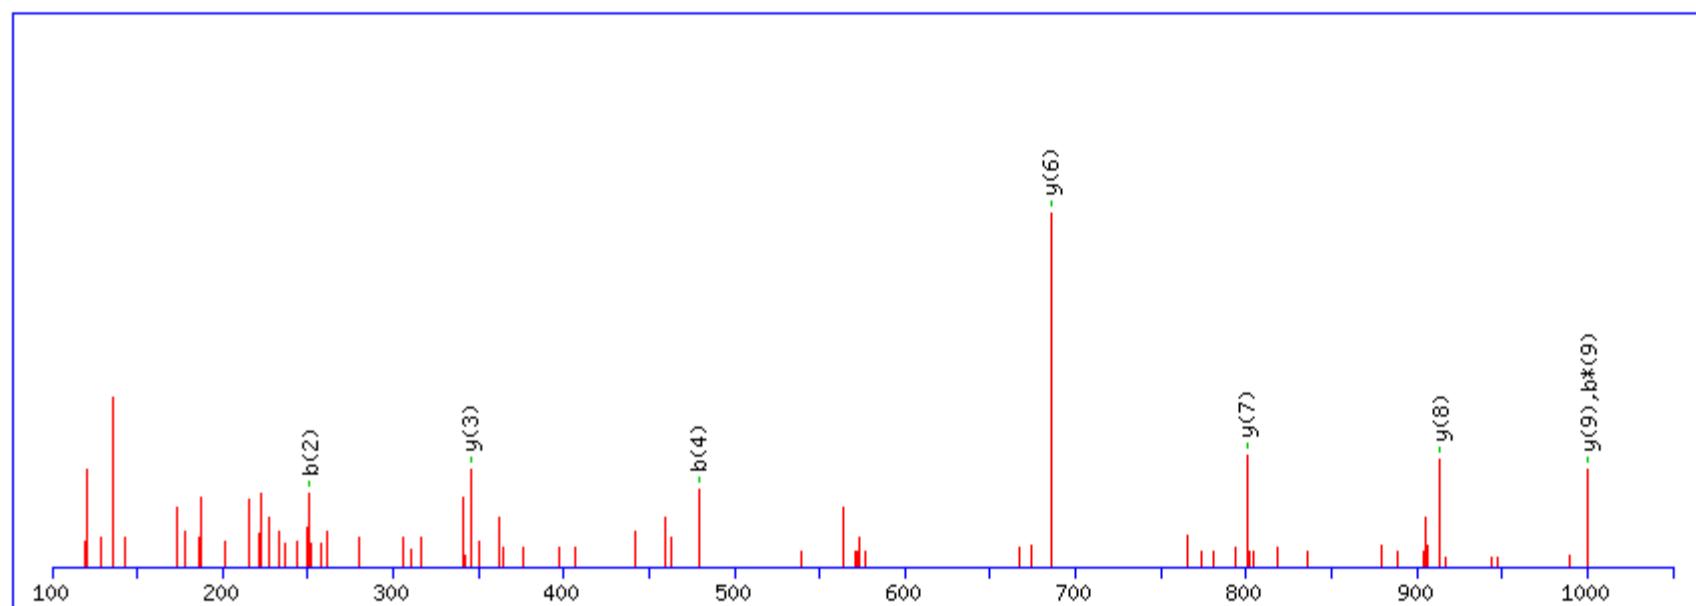

Monoisotopic mass of neutral peptide Mr(calc): 1162.550598

Fixed modifications: Carbamidomethyl (C) (apply to specified residues or termini only)

Ions Score: 42 Expect: 0.00066

Matches : 8/92 fragment ions using 9 most intense peaks ([help](#))

| #  | b                 | b <sup>++</sup> | b*                 | b <sup>+++</sup> | b <sup>0</sup> | b <sup>0++</sup> | Seq. | y                  | y <sup>++</sup> | y*         | y <sup>+++</sup> | y <sup>0</sup> | y <sup>0++</sup> | #  |
|----|-------------------|-----------------|--------------------|------------------|----------------|------------------|------|--------------------|-----------------|------------|------------------|----------------|------------------|----|
| 1  | 164.070605        | 82.538940       |                    |                  |                |                  | Y    |                    |                 |            |                  |                |                  | 10 |
| 2  | <b>251.102633</b> | 126.054954      |                    |                  | 233.092068     | 117.049672       | S    | <b>1000.494566</b> | 500.750921      | 983.468017 | 492.237647       | 982.484001     | 491.745639       | 9  |
| 3  | 364.186697        | 182.596986      |                    |                  | 346.176132     | 173.591704       | L    | <b>913.462538</b>  | 457.234907      | 896.435989 | 448.721633       | 895.451973     | 448.229625       | 8  |
| 4  | <b>479.213640</b> | 240.110458      |                    |                  | 461.203075     | 231.105176       | D    | <b>800.378474</b>  | 400.692875      | 783.351925 | 392.179601       | 782.367909     | 391.687593       | 7  |
| 5  | 576.266404        | 288.636840      |                    |                  | 558.255839     | 279.631558       | P    | <b>685.351531</b>  | 343.179404      | 668.324982 | 334.666129       | 667.340966     | 334.174121       | 6  |
| 6  | 705.308997        | 353.158137      |                    |                  | 687.298432     | 344.152854       | E    | 588.298767         | 294.653022      | 571.272218 | 286.139747       | 570.288202     | 285.647739       | 5  |
| 7  | 819.351924        | 410.179600      | 802.325375         | 401.666326       | 801.341359     | 401.174318       | N    | 459.256174         | 230.131725      | 442.229625 | 221.618450       | 441.245609     | 221.126443       | 4  |
| 8  | 916.404688        | 458.705982      | 899.378139         | 450.192708       | 898.394123     | 449.700700       | P    | <b>345.213247</b>  | 173.110262      | 328.186698 | 164.596987       | 327.202682     | 164.104979       | 3  |
| 9  | 1017.452367       | 509.229822      | <b>1000.425818</b> | 500.716547       | 999.441802     | 500.224539       | T    | 248.160483         | 124.583879      | 231.133934 | 116.070605       | 230.149918     | 115.578597       | 2  |
| 10 |                   |                 |                    |                  |                |                  | K    | 147.112804         | 74.060040       | 130.086255 | 65.546765        |                |                  | 1  |

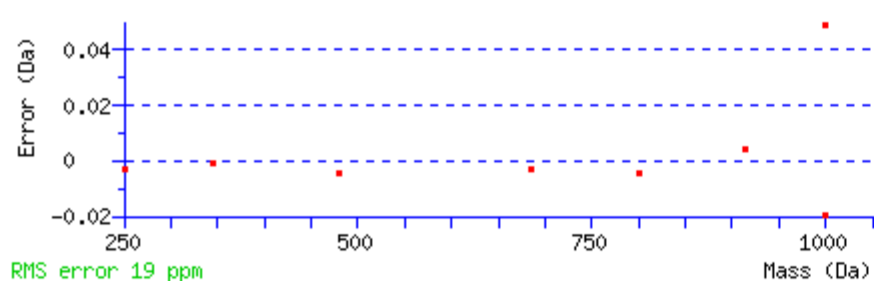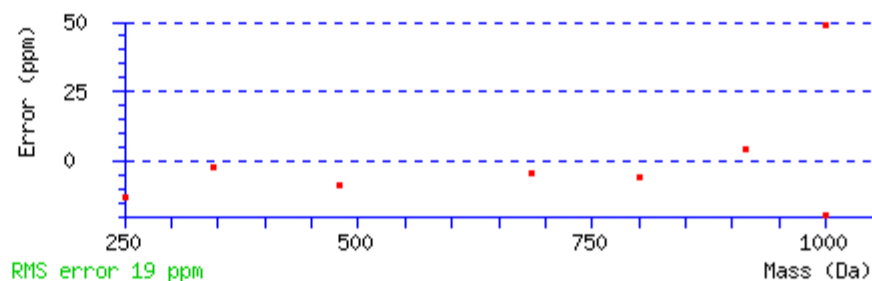

NCBI BLAST search of **YSLDPENPTK**

(Parameters: blastp, nr protein database, expect=20000, no filter, PAM30)

Other BLAST [web gateways](#)

## All matches to this query

| Score | Mr(calc):   | Delta     | Sequence                   |
|-------|-------------|-----------|----------------------------|
| 42.4  | 1162.550598 | 0.003830  | <a href="#">YSLDPENPTK</a> |
| 8.1   | 1162.544083 | 0.010345  | <a href="#">WIRDNEVTM</a>  |
| 1.9   | 1162.565872 | -0.011444 | <a href="#">YPPPSFPTNK</a> |
| 1.9   | 1162.565872 | -0.011444 | <a href="#">YPPPSFPTNK</a> |
| 1.3   | 1162.565872 | -0.011444 | <a href="#">YPPPSFPTNK</a> |

# MASCOT Search Results

## Peptide View

MS/MS Fragmentation of **FNPFVTSDR**

Found in **RL26L\_HUMAN**, 60S ribosomal protein L26-like 1 OS=Homo sapiens GN=RPL26L1 PE=1 SV=1

Match to Query 15052: 1081.517788 from(541.766170,2+) rtinseconds(2217) index(26688)

Title: Locus:1.1.1.1289.18

Data file 2012-01-27 - TFD - Epitel - IEC - 10ul - 3.mgf

Click mouse within plot area to zoom in by factor of two about that point

Or, Plot from  to  Da

Label all possible matches  Label matches used for scoring

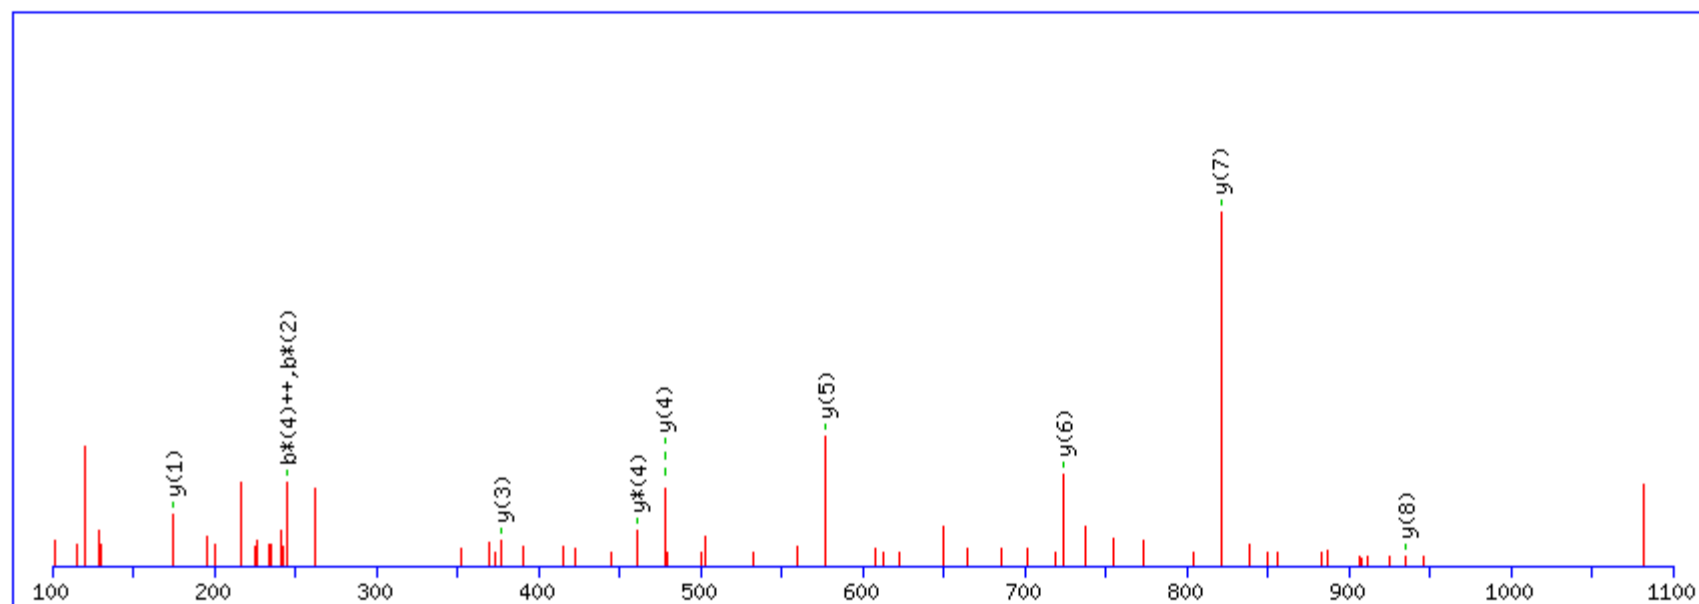

Monoisotopic mass of neutral peptide Mr(calc): 1081.519272

Fixed modifications: Carbamidomethyl (C) (apply to specified residues or termini only)

Ions Score: 44 Expect: 0.00028

Matches : 10/82 fragment ions using 18 most intense peaks [\(help\)](#)

| # | b          | b <sup>++</sup> | b <sup>*</sup> | b <sup>*++</sup> | b <sup>0</sup> | b <sup>0++</sup> | Seq. | y          | y <sup>++</sup> | y <sup>*</sup> | y <sup>*++</sup> | y <sup>0</sup> | y <sup>0++</sup> | # |
|---|------------|-----------------|----------------|------------------|----------------|------------------|------|------------|-----------------|----------------|------------------|----------------|------------------|---|
| 1 | 148.075690 | 74.541483       |                |                  |                |                  | F    |            |                 |                |                  |                |                  | 9 |
| 2 | 262.118617 | 131.562946      | 245.092068     | 123.049672       |                |                  | N    | 935.458121 | 468.232699      | 918.431572     | 459.719424       | 917.447556     | 459.227416       | 8 |
| 3 | 359.171381 | 180.089328      | 342.144832     | 171.576054       |                |                  | P    | 821.415194 | 411.211235      | 804.388645     | 402.697960       | 803.404629     | 402.205952       | 7 |
| 4 | 506.239795 | 253.623535      | 489.213246     | 245.110261       |                |                  | F    | 724.362430 | 362.684853      | 707.335881     | 354.171579       | 706.351865     | 353.679571       | 6 |
| 5 | 605.308209 | 303.157742      | 588.281660     | 294.644468       |                |                  | V    | 577.294016 | 289.150646      | 560.267467     | 280.637372       | 559.283451     | 280.145364       | 5 |
| 6 | 706.355888 | 353.681582      | 689.329339     | 345.168307       | 688.345323     | 344.676299       | T    | 478.225602 | 239.616439      | 461.199053     | 231.103164       | 460.215037     | 230.611156       | 4 |
| 7 | 793.387916 | 397.197596      | 776.361367     | 388.684321       | 775.377351     | 388.192313       | S    | 377.177923 | 189.092599      | 360.151374     | 180.579325       | 359.167358     | 180.087317       | 3 |
| 8 | 908.414859 | 454.711067      | 891.388310     | 446.197793       | 890.404294     | 445.705785       | D    | 290.145895 | 145.576585      | 273.119346     | 137.063311       | 272.135330     | 136.571303       | 2 |
| 9 |            |                 |                |                  |                |                  | R    | 175.118952 | 88.063114       | 158.092403     | 79.549840        |                |                  | 1 |

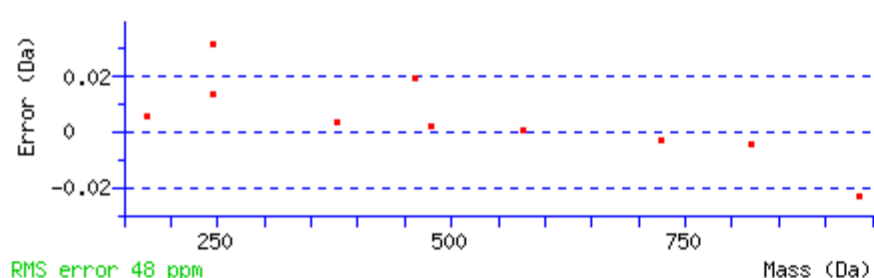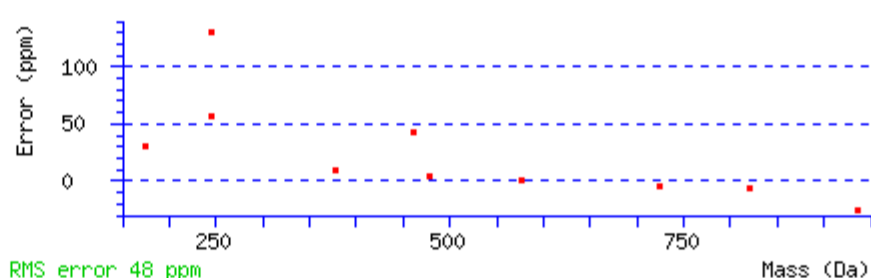

NCBI BLAST search of **FNPFVTSDR**

(Parameters: blastp, nr protein database, expect=20000, no filter, PAM30)

Other BLAST [web gateways](#)

## All matches to this query

| Score | Mr(calc):   | Delta     | Sequence                  |
|-------|-------------|-----------|---------------------------|
| 44.0  | 1081.519272 | -0.001484 | <a href="#">FNPFVTSDR</a> |
| 6.0   | 1081.522629 | -0.004841 | <a href="#">KPSMFVDSR</a> |
| 4.3   | 1081.519241 | -0.001453 | <a href="#">AAWYTIDSR</a> |
| 3.5   | 1081.522614 | -0.004826 | <a href="#">NMALEVFSR</a> |

# Mascot Search Results

## Peptide View

MS/MS Fragmentation of **AFLIEEQK**

Found in **RL34\_HUMAN**, 60S ribosomal protein L34 OS=Homo sapiens GN=RPL34 PE=1 SV=3

Match to Query 12053: 976.521788 from(489.268170,2+) rtinseconds(2014) index(23452)

Title: Locus:1.1.1.1156.15

Data file 2012-01-27 - TFD - Epitel - IEC - 10ul - 1.mgf

Click mouse within plot area to zoom in by factor of two about that point

Or, Plot from  to  Da

Label all possible matches  Label matches used for scoring

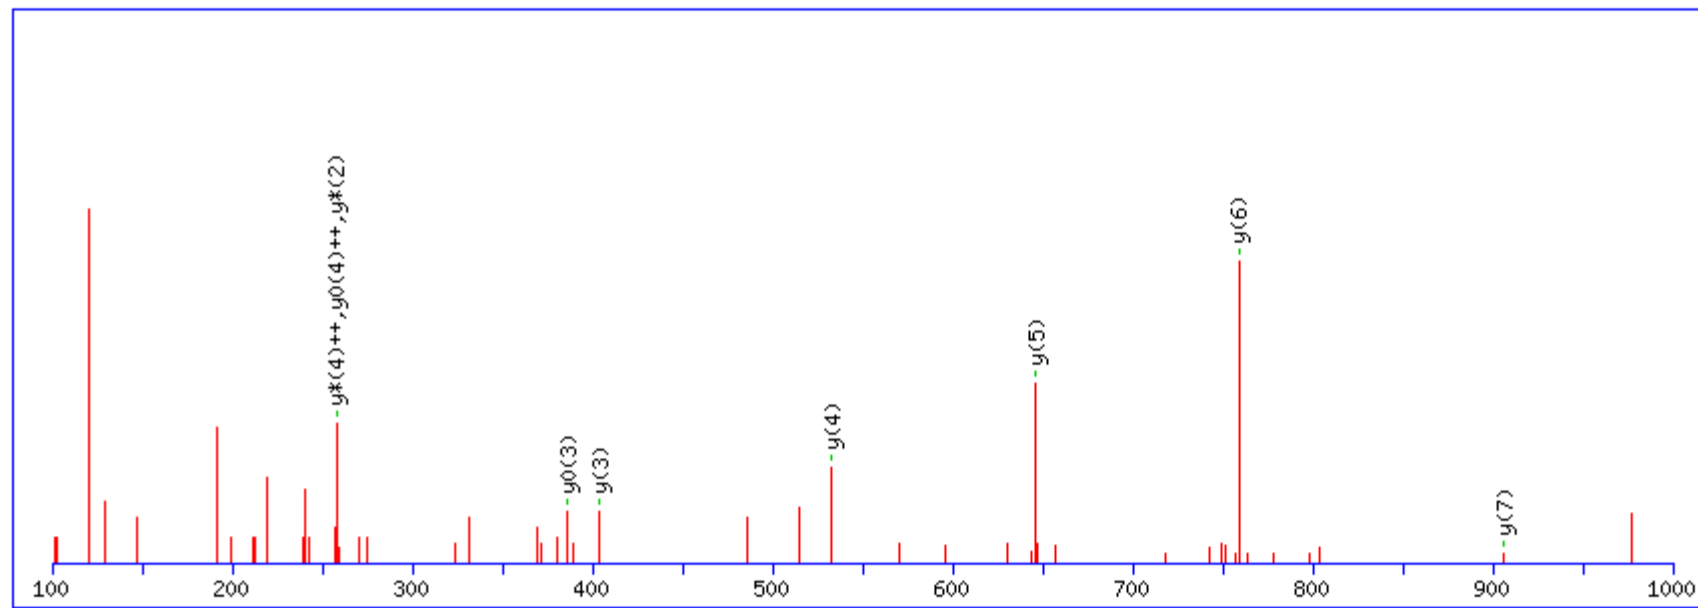

Monoisotopic mass of neutral peptide Mr(calc): 976.522919

Fixed modifications: Carbamidomethyl (C) (apply to specified residues or termini only)

Ions Score: 41 Expect: 0.00048

Matches : 9/60 fragment ions using 9 most intense peaks [\(help\)](#)

| # | b          | b <sup>++</sup> | b <sup>*</sup> | b <sup>+++</sup> | b <sup>0</sup> | b <sup>0++</sup> | Seq. | y                 | y <sup>++</sup> | y <sup>*</sup>    | y <sup>+++</sup>  | y <sup>0</sup>    | y <sup>0++</sup>  | # |
|---|------------|-----------------|----------------|------------------|----------------|------------------|------|-------------------|-----------------|-------------------|-------------------|-------------------|-------------------|---|
| 1 | 72.044390  | 36.525833       |                |                  |                |                  | A    |                   |                 |                   |                   |                   |                   | 8 |
| 2 | 219.112804 | 110.060040      |                |                  |                |                  | F    | <b>906.493110</b> | 453.750193      | 889.466561        | 445.236919        | 888.482545        | 444.744911        | 7 |
| 3 | 332.196868 | 166.602072      |                |                  |                |                  | L    | <b>759.424696</b> | 380.215986      | 742.398147        | 371.702712        | 741.414131        | 371.210704        | 6 |
| 4 | 445.280932 | 223.144104      |                |                  |                |                  | I    | <b>646.340632</b> | 323.673954      | 629.314083        | 315.160680        | 628.330067        | 314.668672        | 5 |
| 5 | 574.323525 | 287.665401      |                |                  | 556.312960     | 278.660118       | E    | <b>533.256568</b> | 267.131922      | 516.230019        | <b>258.618648</b> | 515.246003        | <b>258.126640</b> | 4 |
| 6 | 703.366118 | 352.186697      |                |                  | 685.355553     | 343.181415       | E    | <b>404.213975</b> | 202.610626      | 387.187426        | 194.097351        | <b>386.203410</b> | 193.605343        | 3 |
| 7 | 831.424696 | 416.215986      | 814.398147     | 407.702712       | 813.414131     | 407.210704       | Q    | 275.171382        | 138.089329      | <b>258.144833</b> | 129.576055        |                   |                   | 2 |
| 8 |            |                 |                |                  |                |                  | K    | 147.112804        | 74.060040       | 130.086255        | 65.546765         |                   |                   | 1 |

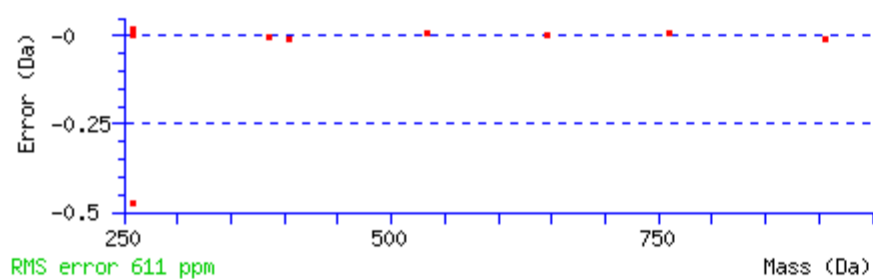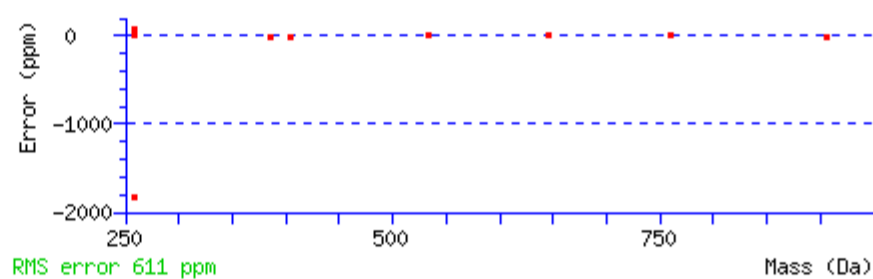

NCBI BLAST search of **AFLIEEQK**

(Parameters: blastp, nr protein database, expect=20000, no filter, PAM30)

Other BLAST [web gateways](#)

All matches to this query

| Score | Mr(calc):  | Delta     | Sequence                  |
|-------|------------|-----------|---------------------------|
| 41.0  | 976.522919 | -0.001131 | <a href="#">AFLIEEQK</a>  |
| 5.4   | 976.526276 | -0.004488 | <a href="#">MAEKILEK</a>  |
| 2.1   | 976.520233 | 0.001555  | <a href="#">AFSRNNLR</a>  |
| 0.9   | 976.522934 | -0.001146 | <a href="#">SSFVAPLEK</a> |

Mascot: <http://www.matrixscience.com/>

# **MATRIX** SCIENCE Mascot Search Results

## Peptide View

MS/MS Fragmentation of **IEISQHAK**

Found in **RL37A\_HUMAN**, 60S ribosomal protein L37a OS=Homo sapiens GN=RPL37A PE=1 SV=2

Match to Query 9779: 924.503308 from(463.258930,2+) rtinseconds(882) index(334)

Title: Locus:1.1.1.1786.3

Data file 2011-11-13 - TFD - EP 7-7.mgf

Click mouse within plot area to zoom in by factor of two about that point

Or, Plot from  to  Da

Label all possible matches  Label matches used for scoring

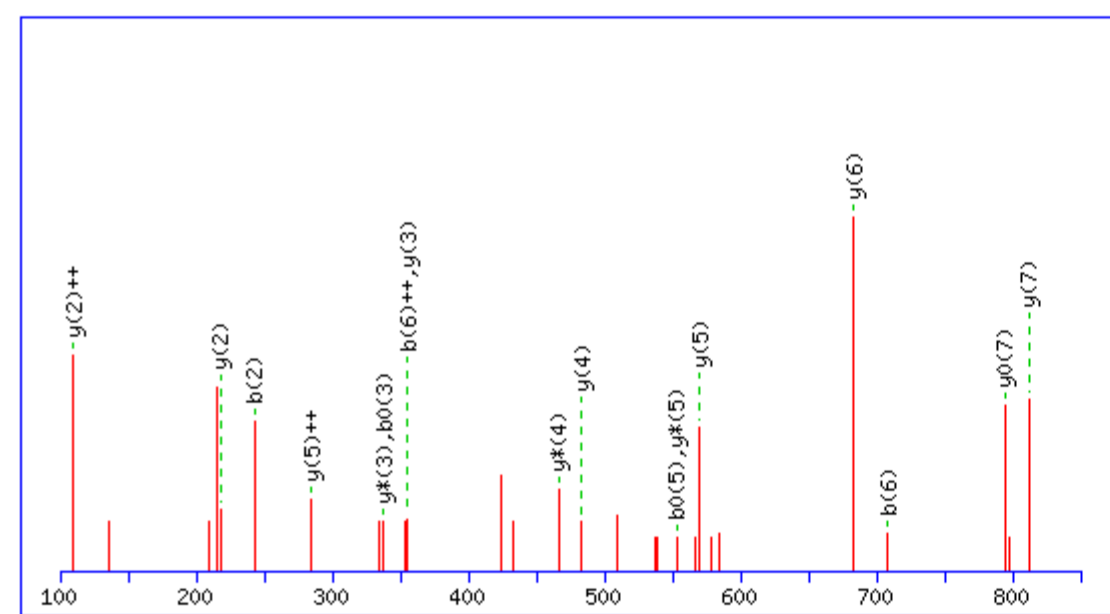

Monoisotopic mass of neutral peptide Mr(calc): 924.502853

Fixed modifications: Propionamide (C) (apply to specified residues or termini only)

Ions Score: 39 Expect: 0.00082

Matches : 17/66 fragment ions using 26 most intense peaks [\(help\)](#)

| # | b                 | b <sup>++</sup>   | b <sup>*</sup> | b <sup>***</sup> | b <sup>0</sup>    | b <sup>0++</sup> | Seq. | y                 | y <sup>++</sup>   | y <sup>*</sup>    | y <sup>***</sup> | y <sup>0</sup>    | y <sup>0++</sup> | # |
|---|-------------------|-------------------|----------------|------------------|-------------------|------------------|------|-------------------|-------------------|-------------------|------------------|-------------------|------------------|---|
| 1 | 114.091340        | 57.549308         |                |                  |                   |                  | I    |                   |                   |                   |                  |                   |                  | 8 |
| 2 | <b>243.133933</b> | 122.070605        |                |                  | 225.123368        | 113.065322       | E    | <b>812.426093</b> | 406.716685        | 795.399544        | 398.203410       | <b>794.415528</b> | 397.711402       | 7 |
| 3 | 356.217997        | 178.612637        |                |                  | <b>338.207432</b> | 169.607354       | I    | <b>683.383500</b> | 342.195388        | 666.356951        | 333.682114       | 665.372935        | 333.190106       | 6 |
| 4 | 443.250025        | 222.128650        |                |                  | 425.239460        | 213.123368       | S    | <b>570.299436</b> | <b>285.653356</b> | <b>553.272887</b> | 277.140082       | 552.288871        | 276.648074       | 5 |
| 5 | 571.308603        | 286.157940        | 554.282054     | 277.644665       | <b>553.298038</b> | 277.152657       | Q    | <b>483.267408</b> | 242.137342        | <b>466.240859</b> | 233.624067       |                   |                  | 4 |
| 6 | <b>708.367515</b> | <b>354.687396</b> | 691.340966     | 346.174121       | 690.356950        | 345.682113       | H    | <b>355.208830</b> | 178.108053        | <b>338.182281</b> | 169.594778       |                   |                  | 3 |
| 7 | 779.404629        | 390.205953        | 762.378080     | 381.692678       | 761.394064        | 381.200670       | A    | <b>218.149918</b> | <b>109.578597</b> | 201.123369        | 101.065322       |                   |                  | 2 |
| 8 |                   |                   |                |                  |                   |                  | K    | 147.112804        | 74.060040         | 130.086255        | 65.546765        |                   |                  | 1 |

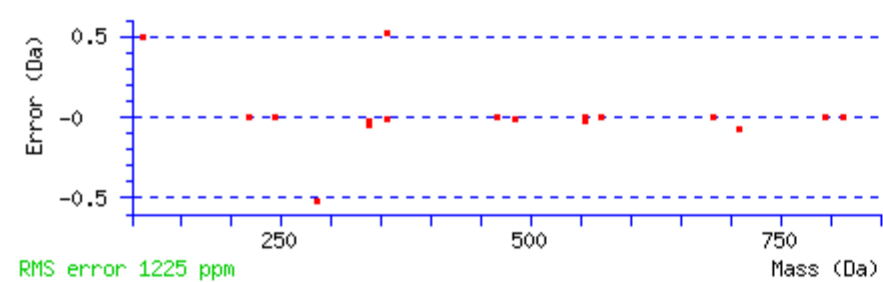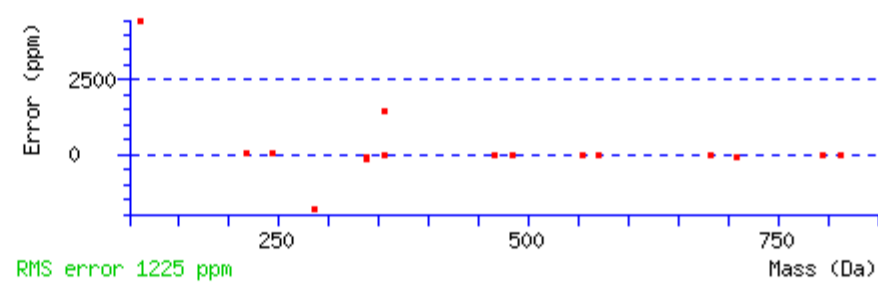

NCBI BLAST search of [IEISQHAK](#)

(Parameters: blastp, nr protein database, expect=20000, no filter, PAM30)

Other BLAST [web gateways](#)

## All matches to this query

| Score | Mr(calc):  | Delta    | Sequence                   |
|-------|------------|----------|----------------------------|
| 38.7  | 924.502853 | 0.000455 | <a href="#">IEISQHAK</a>   |
| 7.3   | 924.502853 | 0.000455 | <a href="#">LEVKASAAH</a>  |
| 1.4   | 924.502869 | 0.000439 | <a href="#">LEGVAAPPR</a>  |
| 1.4   | 924.502869 | 0.000439 | <a href="#">LEGVAAPPR</a>  |
| 1.4   | 924.502853 | 0.000455 | <a href="#">LERADPPK</a>   |
| 1.3   | 924.502869 | 0.000439 | <a href="#">AKGPSPPGAK</a> |
| 0.6   | 924.502869 | 0.000439 | <a href="#">AKGPSPPGAK</a> |

# **MATRIX** SCIENCE Mascot Search Results

## Peptide View

MS/MS Fragmentation of **FIDTTSK**

Found in **RL3L\_HUMAN**, 60S ribosomal protein L3-like OS=Homo sapiens GN=RPL3L PE=1 SV=3

Match to Query 944: 810.413488 from(406.214020,2+) rtinseconds(994) index(3062)

Title: Locus:1.1.1.1813.3

Data file 2011-11-10 - TFD - EP 3-1.mgf

Click mouse within plot area to zoom in by factor of two about that point

Or, Plot from  to  Da

Label all possible matches  Label matches used for scoring

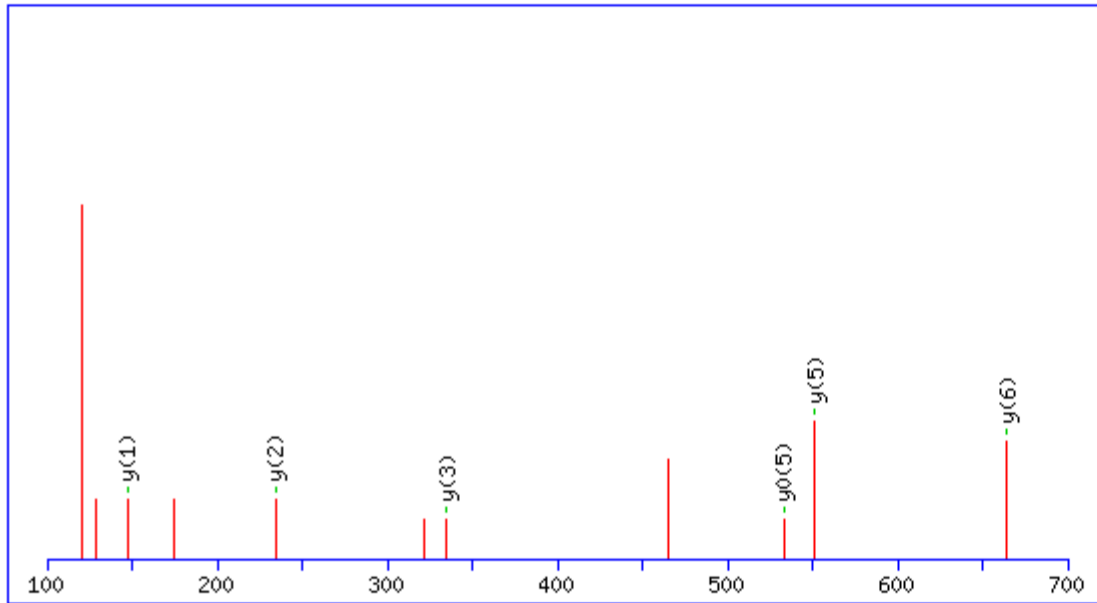

Monoisotopic mass of neutral peptide Mr(calc): 810.412338

Fixed modifications: Propionamide (C) (apply to specified residues or termini only)

Ions Score: 40 Expect: 0.00075

Matches : 6/54 fragment ions using 9 most intense peaks [\(help\)](#)

| # | b          | b <sup>++</sup> | b <sup>0</sup> | b <sup>0++</sup> | Seq.     | y                 | y <sup>++</sup> | y <sup>*</sup> | y <sup>*++</sup> | y <sup>0</sup>    | y <sup>0++</sup> | # |
|---|------------|-----------------|----------------|------------------|----------|-------------------|-----------------|----------------|------------------|-------------------|------------------|---|
| 1 | 148.075690 | 74.541483       |                |                  | <b>F</b> |                   |                 |                |                  |                   |                  | 7 |
| 2 | 261.159754 | 131.083515      |                |                  | <b>I</b> | <b>664.351197</b> | 332.679237      | 647.324648     | 324.165962       | 646.340632        | 323.673954       | 6 |
| 3 | 376.186697 | 188.596986      | 358.176132     | 179.591704       | <b>D</b> | <b>551.267133</b> | 276.137205      | 534.240584     | 267.623930       | <b>533.256568</b> | 267.131922       | 5 |
| 4 | 477.234376 | 239.120826      | 459.223811     | 230.115544       | <b>T</b> | 436.240190        | 218.623733      | 419.213641     | 210.110458       | 418.229625        | 209.618450       | 4 |
| 5 | 578.282055 | 289.644666      | 560.271490     | 280.639383       | <b>T</b> | <b>335.192511</b> | 168.099893      | 318.165962     | 159.586619       | 317.181946        | 159.094611       | 3 |
| 6 | 665.314083 | 333.160680      | 647.303518     | 324.155397       | <b>S</b> | <b>234.144832</b> | 117.576054      | 217.118283     | 109.062779       | 216.134267        | 108.570771       | 2 |
| 7 |            |                 |                |                  | <b>K</b> | <b>147.112804</b> | 74.060040       | 130.086255     | 65.546765        |                   |                  | 1 |

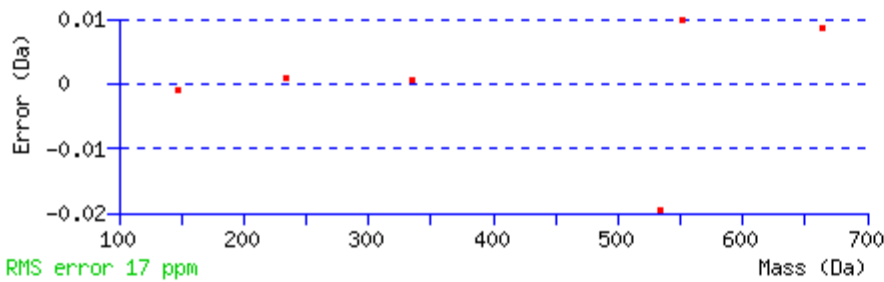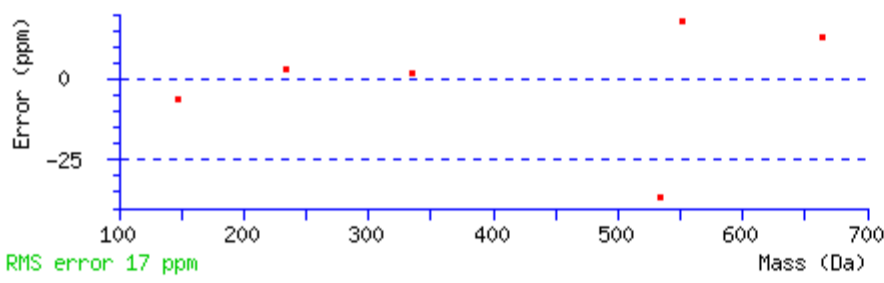

NCBI BLAST search of **FIDTTSK**

(Parameters: blastp, nr protein database, expect=20000, no filter, PAM30)

Other BLAST [web gateways](#)

## All matches to this query

| Score | Mr(calc):  | Delta     | Sequence                |
|-------|------------|-----------|-------------------------|
| 39.8  | 810.412338 | 0.001150  | <a href="#">FIDTTSK</a> |
| 24.4  | 810.405807 | 0.007681  | <a href="#">FLQTMR</a>  |
| 9.6   | 810.405807 | 0.007681  | <a href="#">FQLTMR</a>  |
| 9.6   | 810.409164 | 0.004324  | <a href="#">MKTLMR</a>  |
| 9.3   | 810.417023 | -0.003535 | <a href="#">MLRGYR</a>  |
| 8.8   | 810.405792 | 0.007696  | <a href="#">FMETRK</a>  |
| 8.8   | 810.412323 | 0.001165  | <a href="#">FSELSTK</a> |
| 7.7   | 810.405807 | 0.007681  | <a href="#">MGALTFR</a> |
| 7.4   | 810.412323 | 0.001165  | <a href="#">LYSPTSK</a> |
| 5.7   | 810.405807 | 0.007681  | <a href="#">LTGMAFR</a> |

# MASCOT SCIENCE Mascot Search Results

## Peptide View

MS/MS Fragmentation of **LAIYDGFDFGFAK**

Found in **K6PP\_HUMAN**, 6-phosphofructokinase type C OS=Homo sapiens GN=PFBP PE=1 SV=2

Match to Query 32523: 1315.632328 from(658.823440,2+) rtinseconds(3190) index(44985)

Title: Locus:1.1.1.1655.15

Data file 2012-01-27 - TFD - Epitel - IEC - 10ul - 3.mgf

Click mouse within plot area to zoom in by factor of two about that point

Or, Plot from  to  Da

Label all possible matches  Label matches used for scoring

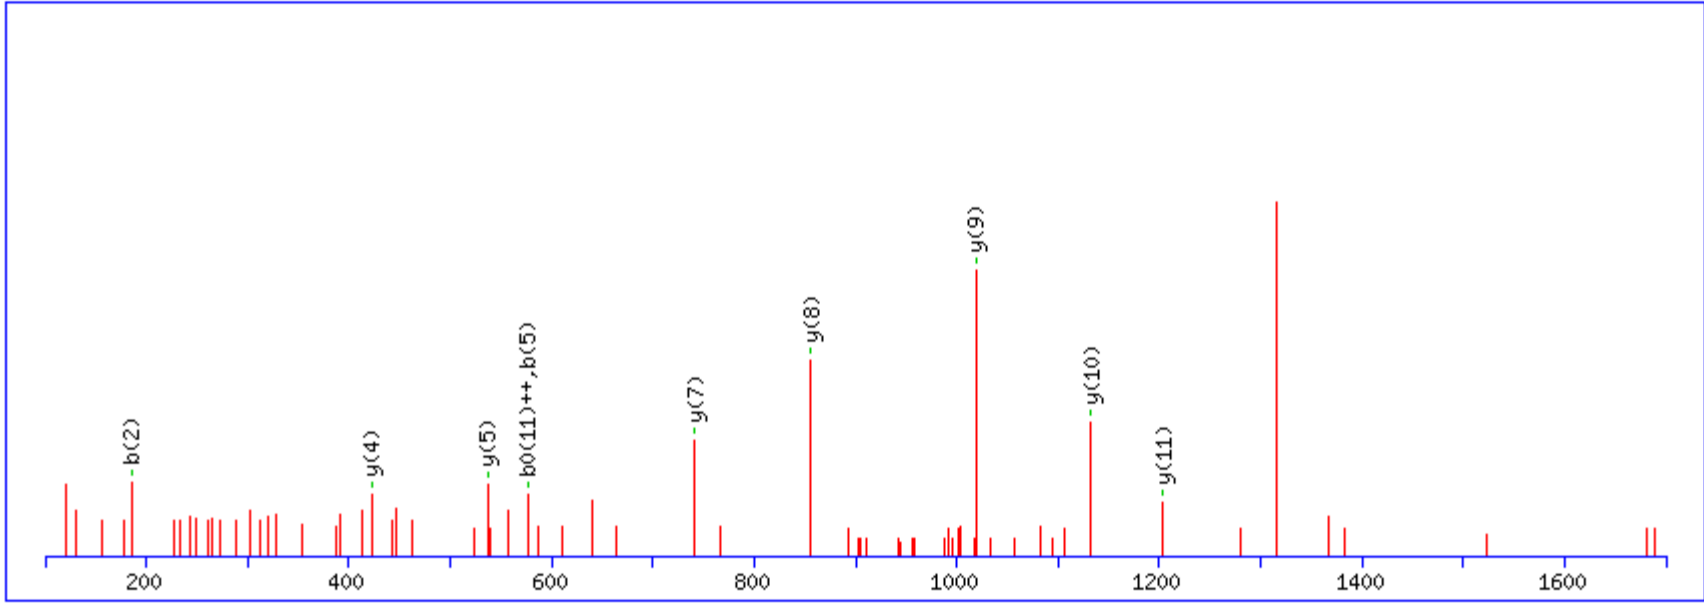

Monoisotopic mass of neutral peptide Mr(calc): 1315.644852

Fixed modifications: Carbamidomethyl (C) (apply to specified residues or termini only)

Ions Score: 38 Expect: 0.00035

Matches : 10/94 fragment ions using 23 most intense peaks ([help](#))

| #  | b                 | b <sup>++</sup> | b <sup>0</sup> | b <sup>0++</sup>  | Seq. | y                  | y <sup>++</sup> | y <sup>*</sup> | y <sup>*++</sup> | y <sup>0</sup> | y <sup>0++</sup> | #  |
|----|-------------------|-----------------|----------------|-------------------|------|--------------------|-----------------|----------------|------------------|----------------|------------------|----|
| 1  | 114.091340        | 57.549308       |                |                   | L    |                    |                 |                |                  |                |                  | 12 |
| 2  | <b>185.128454</b> | 93.067865       |                |                   | A    | <b>1203.568067</b> | 602.287672      | 1186.541518    | 593.774397       | 1185.557502    | 593.282389       | 11 |
| 3  | 298.212518        | 149.609897      |                |                   | I    | <b>1132.530953</b> | 566.769115      | 1115.504404    | 558.255840       | 1114.520388    | 557.763832       | 10 |
| 4  | 461.275847        | 231.141561      |                |                   | Y    | <b>1019.446889</b> | 510.227083      | 1002.420340    | 501.713808       | 1001.436324    | 501.221800       | 9  |
| 5  | <b>576.302790</b> | 288.655033      | 558.292225     | 279.649751        | D    | <b>856.383560</b>  | 428.695418      | 839.357011     | 420.182144       | 838.372995     | 419.690136       | 8  |
| 6  | 633.324254        | 317.165765      | 615.313689     | 308.160483        | G    | <b>741.356617</b>  | 371.181947      | 724.330068     | 362.668672       | 723.346052     | 362.176664       | 7  |
| 7  | 780.392668        | 390.699972      | 762.382103     | 381.694690        | F    | 684.335153         | 342.671215      | 667.308604     | 334.157940       | 666.324588     | 333.665932       | 6  |
| 8  | 895.419611        | 448.213444      | 877.409046     | 439.208161        | D    | <b>537.266739</b>  | 269.137008      | 520.240190     | 260.623733       | 519.256174     | 260.131725       | 5  |
| 9  | 952.441075        | 476.724176      | 934.430510     | 467.718893        | G    | <b>422.239796</b>  | 211.623536      | 405.213247     | 203.110261       |                |                  | 4  |
| 10 | 1099.509489       | 550.258383      | 1081.498924    | 541.253100        | F    | 365.218332         | 183.112804      | 348.191783     | 174.599529       |                |                  | 3  |
| 11 | 1170.546603       | 585.776940      | 1152.536038    | <b>576.771657</b> | A    | 218.149918         | 109.578597      | 201.123369     | 101.065322       |                |                  | 2  |
| 12 |                   |                 |                |                   | K    | 147.112804         | 74.060040       | 130.086255     | 65.546765        |                |                  | 1  |

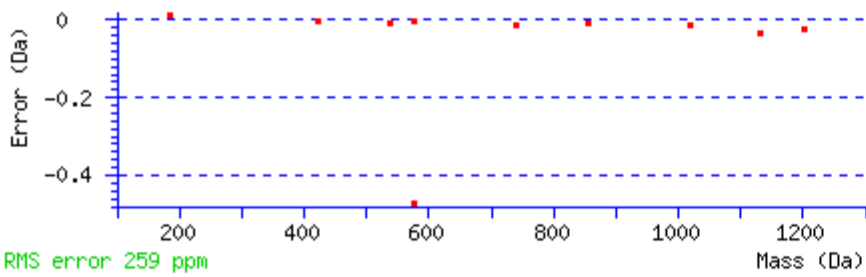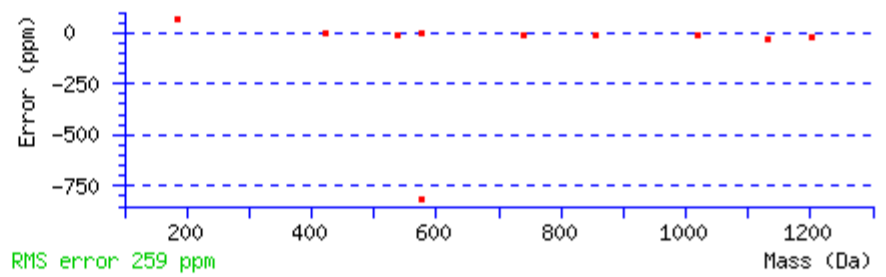

NCBI BLAST search of **LAIYDGFDFGFAK**

(Parameters: blastp, nr protein database, expect=20000, no filter, PAM30)

Other BLAST [web gateways](#)

## All matches to this query

| Score | Mr(calc):   | Delta     | Sequence                      |
|-------|-------------|-----------|-------------------------------|
| 37.5  | 1315.644852 | -0.012524 | <a href="#">LAIYDGFDFGFAK</a> |
| 0.7   | 1315.644180 | -0.011852 | <a href="#">LAEMPPSLDTSR</a>  |

# Mascot Search Results

## Peptide View

MS/MS Fragmentation of **VTLTLPVLNAAR**

Found in **6PGL\_HUMAN**, 6-phosphogluconolactonase OS=Homo sapiens GN=PGLS PE=1 SV=2

Match to Query 28985: 1266.759228 from(634.386890,2+) rtinseconds(3148) index(44191)

Title: Locus:1.1.1.1639.21

Data file 2012-01-27 - TFD - Epitel - IEC - 10ul - 3.mgf

Click mouse within plot area to zoom in by factor of two about that point

Or, Plot from  to  Da

Label all possible matches  Label matches used for scoring

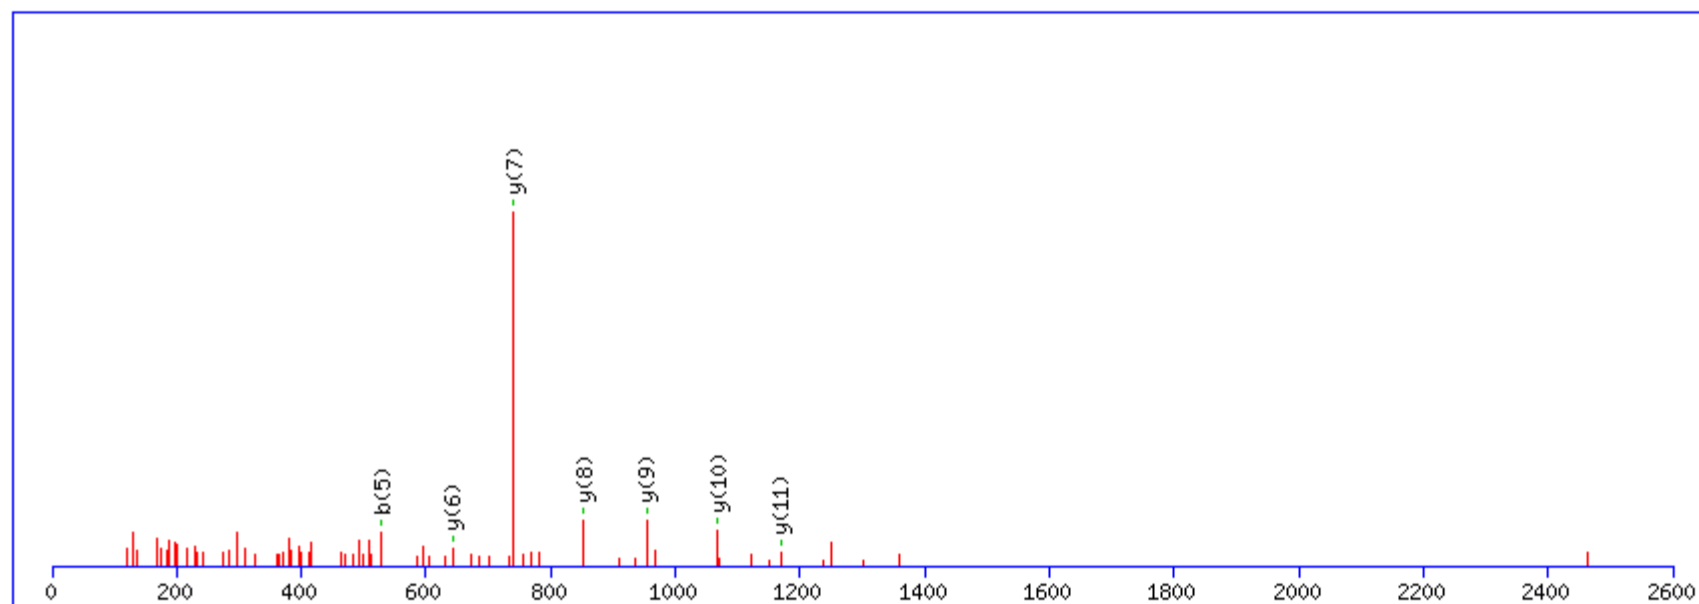

Monoisotopic mass of neutral peptide Mr(calc): 1266.765961

Fixed modifications: Carbamidomethyl (C) (apply to specified residues or termini only)

Ions Score: 40 Expect: 0.00018

Matches : 7/98 fragment ions using 12 most intense peaks [\(help\)](#)

| #  | b                 | b <sup>++</sup> | b <sup>*</sup> | b <sup>+++</sup> | b <sup>0</sup> | b <sup>0++</sup> | Seq. | y                  | y <sup>++</sup> | y <sup>*</sup> | y <sup>+++</sup> | y <sup>0</sup> | y <sup>0++</sup> | #  |
|----|-------------------|-----------------|----------------|------------------|----------------|------------------|------|--------------------|-----------------|----------------|------------------|----------------|------------------|----|
| 1  | 100.075690        | 50.541483       |                |                  |                |                  | V    |                    |                 |                |                  |                |                  | 12 |
| 2  | 201.123369        | 101.065322      |                |                  | 183.112804     | 92.060040        | T    | <b>1168.704835</b> | 584.856056      | 1151.678286    | 576.342781       | 1150.694270    | 575.850773       | 11 |
| 3  | 314.207433        | 157.607354      |                |                  | 296.196868     | 148.602072       | L    | <b>1067.657156</b> | 534.332216      | 1050.630607    | 525.818942       | 1049.646591    | 525.326934       | 10 |
| 4  | 415.255112        | 208.131194      |                |                  | 397.244547     | 199.125912       | T    | <b>954.573092</b>  | 477.790184      | 937.546543     | 469.276910       | 936.562527     | 468.784902       | 9  |
| 5  | <b>528.339176</b> | 264.673226      |                |                  | 510.328611     | 255.667944       | L    | <b>853.525413</b>  | 427.266345      | 836.498864     | 418.753070       |                |                  | 8  |
| 6  | 625.391940        | 313.199608      |                |                  | 607.381375     | 304.194326       | P    | <b>740.441349</b>  | 370.724313      | 723.414800     | 362.211038       |                |                  | 7  |
| 7  | 724.460354        | 362.733815      |                |                  | 706.449789     | 353.728533       | V    | <b>643.388585</b>  | 322.197931      | 626.362036     | 313.684656       |                |                  | 6  |
| 8  | 837.544418        | 419.275847      |                |                  | 819.533853     | 410.270565       | L    | 544.320171         | 272.663724      | 527.293622     | 264.150449       |                |                  | 5  |
| 9  | 951.587345        | 476.297311      | 934.560796     | 467.784036       | 933.576780     | 467.292028       | N    | 431.236107         | 216.121691      | 414.209558     | 207.608417       |                |                  | 4  |
| 10 | 1022.624459       | 511.815868      | 1005.597910    | 503.302593       | 1004.613894    | 502.810585       | A    | 317.193180         | 159.100228      | 300.166631     | 150.586953       |                |                  | 3  |
| 11 | 1093.661573       | 547.334425      | 1076.635024    | 538.821150       | 1075.651008    | 538.329142       | A    | 246.156066         | 123.581671      | 229.129517     | 115.068397       |                |                  | 2  |
| 12 |                   |                 |                |                  |                |                  | R    | 175.118952         | 88.063114       | 158.092403     | 79.549839        |                |                  | 1  |

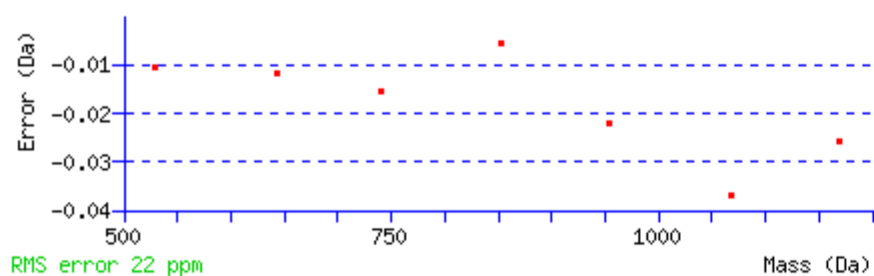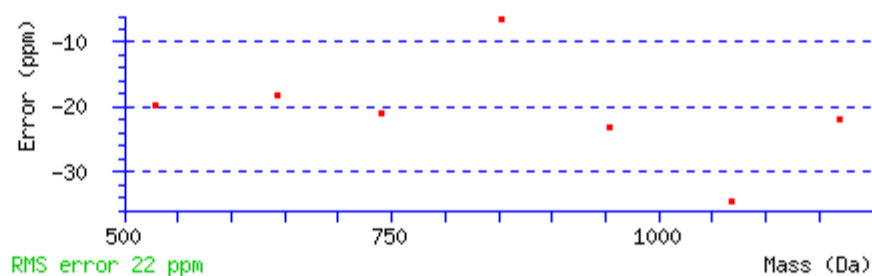

NCBI BLAST search of **VTLTLPVLNAAR**

(Parameters: blastp, nr protein database, expect=20000, no filter, PAM30)

Other BLAST [web gateways](#)

All matches to this query

| Score | Mr(calc):   | Delta     | Sequence                     |
|-------|-------------|-----------|------------------------------|
| 40.1  | 1266.765961 | -0.006733 | <a href="#">VTLTLPVLNAAR</a> |

Mascot: <http://www.matrixscience.com/>



**MASCOT** **SCIENCE** Mascot Search Results

**Peptide View**

MS/MS Fragmentation of **VVALIGVATAADTLVTK**

Found in **ABHDA\_HUMAN**, Abhydrolase domain-containing protein 10, mitochondrial OS=Homo sapiens GN=ABHD10 PE=1 SV=1

Match to Query 47988: 1640.975368 from(821.494960,2+) rtinseconds(3680) index(49831)

Title: Locus:1.1.1.2985.34

Data file 2011-11-12 - TFD - EP 5-5.mgf

Click mouse within plot area to zoom in by factor of two about that point

Or, Plot from  to  Da

Label all possible matches  Label matches used for scoring

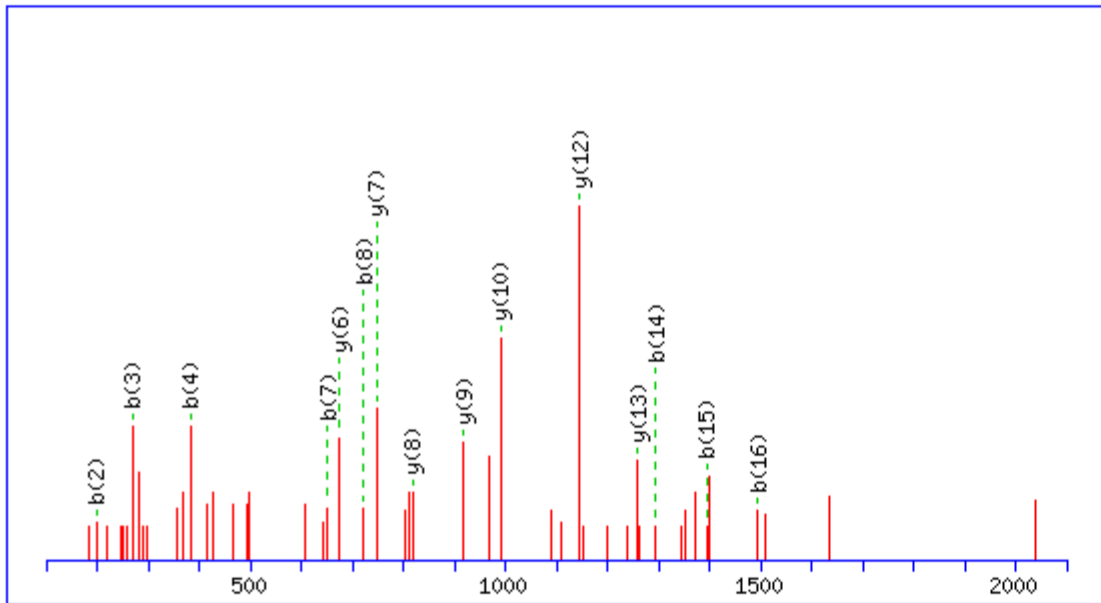

Monoisotopic mass of neutral peptide Mr(calc): 1640.971283

Fixed modifications: Propionamide (C) (apply to specified residues or termini only)

Ions Score: 50 Expect: 1.1e-005

Matches : 15/142 fragment ions using 37 most intense peaks [\(help\)](#)

| #  | b                  | b <sup>++</sup> | b <sup>0</sup> | b <sup>0++</sup> | Seq. | y                  | y <sup>++</sup> | y <sup>*</sup> | y <sup>***</sup> | y <sup>0</sup> | y <sup>0++</sup> | #  |
|----|--------------------|-----------------|----------------|------------------|------|--------------------|-----------------|----------------|------------------|----------------|------------------|----|
| 1  | 100.075690         | 50.541483       |                |                  | V    |                    |                 |                |                  |                |                  | 17 |
| 2  | <b>199.144104</b>  | 100.075690      |                |                  | V    | 1542.910138        | 771.958707      | 1525.883589    | 763.445433       | 1524.899573    | 762.953424       | 16 |
| 3  | <b>270.181218</b>  | 135.594247      |                |                  | A    | 1443.841724        | 722.424500      | 1426.815175    | 713.911226       | 1425.831159    | 713.419218       | 15 |
| 4  | <b>383.265282</b>  | 192.136279      |                |                  | L    | 1372.804610        | 686.905943      | 1355.778061    | 678.392669       | 1354.794045    | 677.900660       | 14 |
| 5  | 496.349346         | 248.678311      |                |                  | I    | <b>1259.720546</b> | 630.363911      | 1242.693997    | 621.850637       | 1241.709981    | 621.358629       | 13 |
| 6  | 553.370810         | 277.189043      |                |                  | G    | <b>1146.636482</b> | 573.821879      | 1129.609933    | 565.308605       | 1128.625917    | 564.816597       | 12 |
| 7  | <b>652.439224</b>  | 326.723250      |                |                  | V    | 1089.615018        | 545.311147      | 1072.588469    | 536.797873       | 1071.604453    | 536.305864       | 11 |
| 8  | <b>723.476338</b>  | 362.241807      |                |                  | A    | <b>990.546604</b>  | 495.776940      | 973.520055     | 487.263666       | 972.536039     | 486.771658       | 10 |
| 9  | 824.524017         | 412.765647      | 806.513452     | 403.760364       | T    | <b>919.509490</b>  | 460.258383      | 902.482941     | 451.745109       | 901.498925     | 451.253101       | 9  |
| 10 | 895.561131         | 448.284204      | 877.550566     | 439.278921       | A    | <b>818.461811</b>  | 409.734544      | 801.435262     | 401.221269       | 800.451246     | 400.729261       | 8  |
| 11 | 966.598245         | 483.802761      | 948.587680     | 474.797478       | A    | <b>747.424697</b>  | 374.215987      | 730.398148     | 365.702712       | 729.414132     | 365.210704       | 7  |
| 12 | 1081.625188        | 541.316232      | 1063.614623    | 532.310949       | D    | <b>676.387583</b>  | 338.697430      | 659.361034     | 330.184155       | 658.377018     | 329.692147       | 6  |
| 13 | 1182.672867        | 591.840072      | 1164.662302    | 582.834789       | T    | 561.360640         | 281.183958      | 544.334091     | 272.670684       | 543.350075     | 272.178676       | 5  |
| 14 | <b>1295.756931</b> | 648.382103      | 1277.746366    | 639.376821       | L    | 460.312961         | 230.660118      | 443.286412     | 222.146844       | 442.302396     | 221.654836       | 4  |
| 15 | <b>1394.825345</b> | 697.916311      | 1376.814780    | 688.911028       | V    | 347.228897         | 174.118087      | 330.202348     | 165.604812       | 329.218332     | 165.112804       | 3  |
| 16 | <b>1495.873024</b> | 748.440150      | 1477.862459    | 739.434868       | T    | 248.160483         | 124.583879      | 231.133934     | 116.070605       | 230.149918     | 115.578597       | 2  |
| 17 |                    |                 |                |                  | K    | 147.112804         | 74.060040       | 130.086255     | 65.546765        |                |                  | 1  |

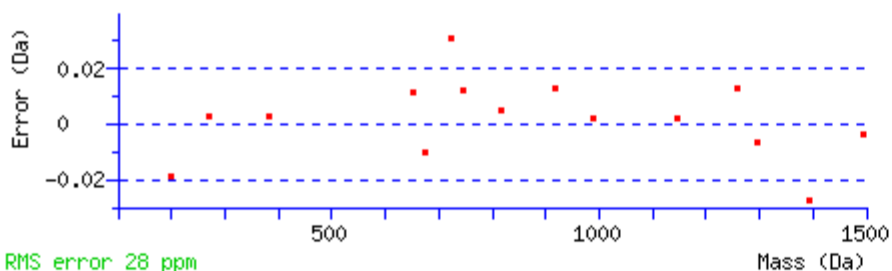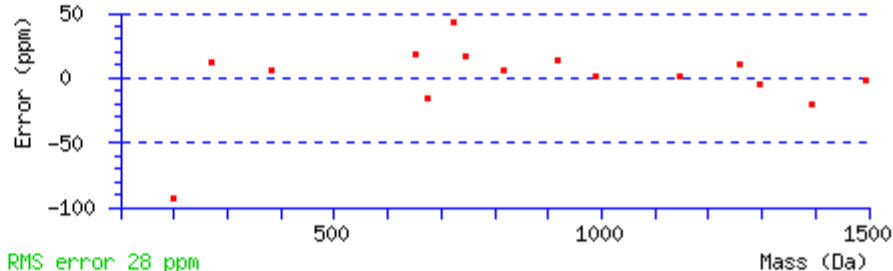

NCBI BLAST search of [VVALIGVATAADTLVTK](#)

(Parameters: blastp, nr protein database, expect=20000, no filter, PAM30)

Other BLAST [web gateways](#)

**All matches to this query**

| Score | Mr(calc):   | Delta    | Sequence                          |
|-------|-------------|----------|-----------------------------------|
| 49.7  | 1640.971283 | 0.004085 | <a href="#">VVALIGVATAADTLVTK</a> |

Mascot: <http://www.matrixscience.com/>

# **MASCOT** Mascot Search Results

## Peptide View

MS/MS Fragmentation of **ALIESYQNLTR**

Found in **ABI1\_HUMAN**, Abl interactor 1 OS=Homo sapiens GN=ABI1 PE=1 SV=4

Match to Query 36725: 1306.697728 from(654.356140,2+) rtinseconds(2458) index(29767)

Title: Locus:1.1.1.2087.39

Data file 2011-11-12 - TFD - EP 6-6.mgf

Click mouse within plot area to zoom in by factor of two about that point

Or, Plot from  to  Da

Label all possible matches  Label matches used for scoring

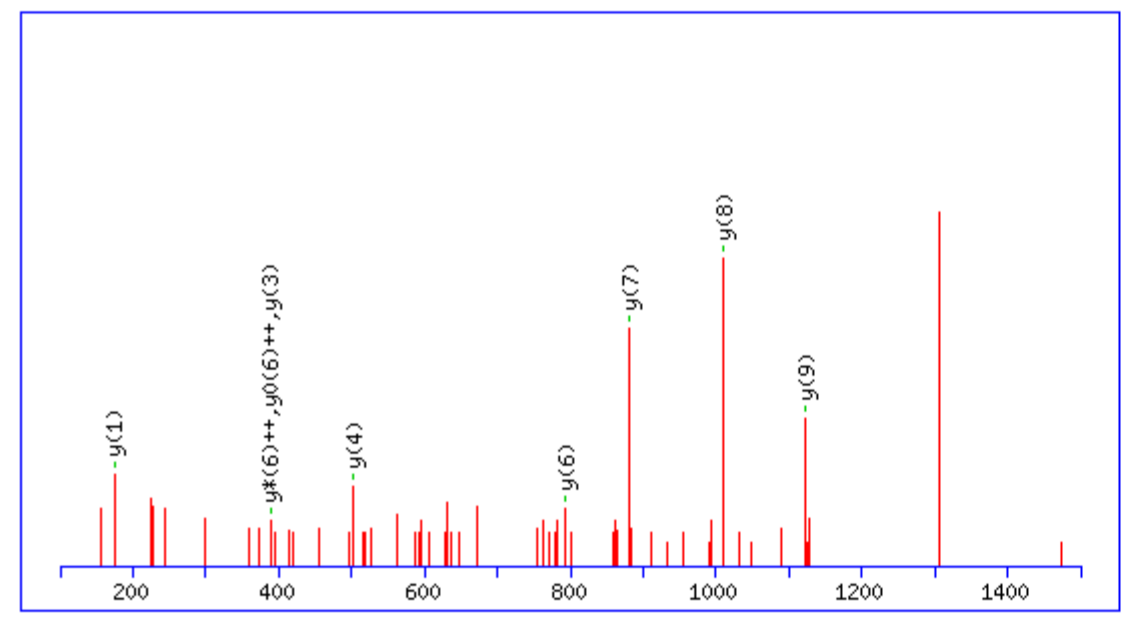

Monoisotopic mass of neutral peptide Mr(calc): 1306.688080

Fixed modifications: Propionamide (C) (apply to specified residues or termini only)

Ions Score: 57 Expect: 2e-005

Matches : 9/100 fragment ions using 10 most intense peaks [\(help\)](#)

| #  | b           | b <sup>++</sup> | b <sup>*</sup> | b <sup>+++</sup> | b <sup>0</sup> | b <sup>0++</sup> | Seq. | y                  | y <sup>++</sup> | y <sup>*</sup> | y <sup>+++</sup>  | y <sup>0</sup> | y <sup>0++</sup>  | #  |
|----|-------------|-----------------|----------------|------------------|----------------|------------------|------|--------------------|-----------------|----------------|-------------------|----------------|-------------------|----|
| 1  | 72.044390   | 36.525833       |                |                  |                |                  | A    |                    |                 |                |                   |                |                   | 11 |
| 2  | 185.128454  | 93.067865       |                |                  |                |                  | L    | 1236.658278        | 618.832777      | 1219.631729    | 610.319503        | 1218.647713    | 609.827495        | 10 |
| 3  | 298.212518  | 149.609897      |                |                  |                |                  | I    | <b>1123.574214</b> | 562.290745      | 1106.547665    | 553.777471        | 1105.563649    | 553.285462        | 9  |
| 4  | 427.255111  | 214.131193      |                |                  | 409.244546     | 205.125911       | E    | <b>1010.490150</b> | 505.748713      | 993.463601     | 497.235439        | 992.479585     | 496.743431        | 8  |
| 5  | 514.287139  | 257.647208      |                |                  | 496.276574     | 248.641925       | S    | <b>881.447557</b>  | 441.227417      | 864.421008     | 432.714142        | 863.436992     | 432.222134        | 7  |
| 6  | 677.350468  | 339.178872      |                |                  | 659.339903     | 330.173590       | Y    | <b>794.415529</b>  | 397.711403      | 777.388980     | <b>389.198128</b> | 776.404964     | <b>388.706120</b> | 6  |
| 7  | 805.409046  | 403.208161      | 788.382497     | 394.694887       | 787.398481     | 394.202879       | Q    | 631.352200         | 316.179738      | 614.325651     | 307.666464        | 613.341635     | 307.174456        | 5  |
| 8  | 919.451973  | 460.229625      | 902.425424     | 451.716350       | 901.441408     | 451.224342       | N    | <b>503.293622</b>  | 252.150449      | 486.267073     | 243.637174        | 485.283057     | 243.145166        | 4  |
| 9  | 1032.536037 | 516.771657      | 1015.509488    | 508.258382       | 1014.525472    | 507.766374       | L    | <b>389.250695</b>  | 195.128985      | 372.224146     | 186.615711        | 371.240130     | 186.123703        | 3  |
| 10 | 1133.583716 | 567.295496      | 1116.557167    | 558.782222       | 1115.573151    | 558.290214       | T    | 276.166631         | 138.586953      | 259.140082     | 130.073679        | 258.156066     | 129.581671        | 2  |
| 11 |             |                 |                |                  |                |                  | R    | <b>175.118952</b>  | 88.063114       | 158.092403     | 79.549839         |                |                   | 1  |

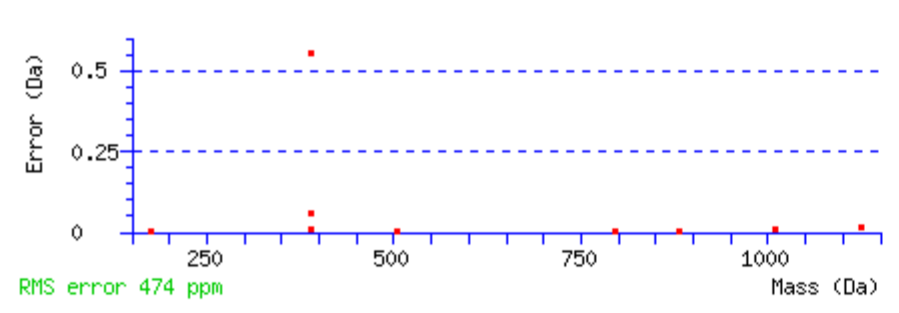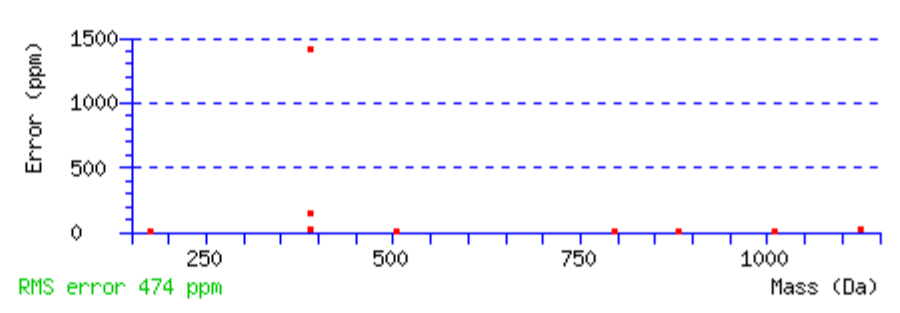

NCBI BLAST search of **ALIESYQNLTR**

(Parameters: blastp, nr protein database, expect=20000, no filter, PAM30)

Other BLAST [web gateways](#)

## All matches to this query

| Score | Mr(calc):   | Delta     | Sequence                     |
|-------|-------------|-----------|------------------------------|
| 56.5  | 1306.688080 | 0.009648  | <a href="#">ALIESYQNLTR</a>  |
| 30.8  | 1306.699326 | -0.001598 | <a href="#">ALPESLGQHALR</a> |

# MASCOT Search Results

## Peptide View

MS/MS Fragmentation of **KLEIEIEAR**

Found in **ASPM\_HUMAN**, Abnormal spindle-like microcephaly-associated protein OS=Homo sapiens GN=ASPM PE=1 SV=2

Match to Query 19510: 1099.628008 from(550.821280,2+) rtinseconds(1875) index(20826)

Title: Locus:1.1.1.2131.31

Data file 2011-11-10 - TFD - EP 3-3.mgf

Click mouse within plot area to zoom in by factor of two about that point

Or, Plot from  to  Da

Label all possible matches  Label matches used for scoring

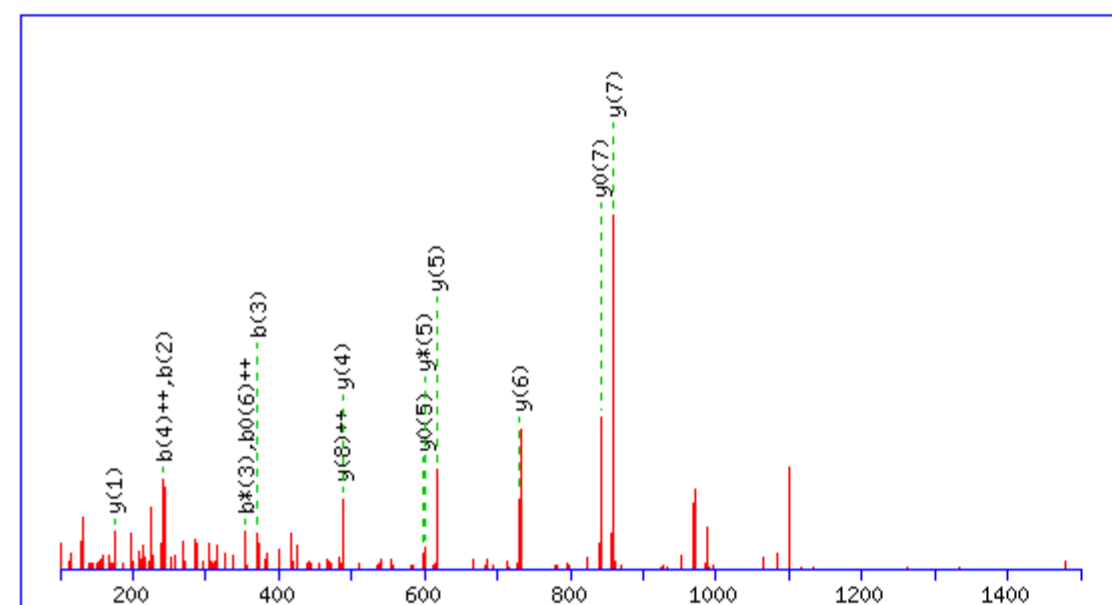

Monoisotopic mass of neutral peptide Mr(calc): 1099.623672

Fixed modifications: Propionamide (C) (apply to specified residues or termini only)

Ions Score: 31 Expect: 0.0089

Matches : 14/88 fragment ions using 20 most intense peaks [\(help\)](#)

| # | b                 | b <sup>++</sup>   | b <sup>*</sup>    | b <sup>*++</sup> | b <sup>0</sup> | b <sup>0++</sup>  | Seq.     | y                 | y <sup>++</sup>   | y <sup>*</sup>    | y <sup>*++</sup> | y <sup>0</sup>    | y <sup>0++</sup> | # |
|---|-------------------|-------------------|-------------------|------------------|----------------|-------------------|----------|-------------------|-------------------|-------------------|------------------|-------------------|------------------|---|
| 1 | 129.102239        | 65.054757         | 112.075690        | 56.541483        |                |                   | <b>K</b> |                   |                   |                   |                  |                   |                  | 9 |
| 2 | <b>242.186303</b> | 121.596790        | 225.159754        | 113.083515       |                |                   | <b>L</b> | 972.536037        | <b>486.771657</b> | 955.509488        | 478.258382       | 954.525472        | 477.766374       | 8 |
| 3 | <b>371.228896</b> | 186.118086        | <b>354.202347</b> | 177.604812       | 353.218331     | 177.112804        | <b>E</b> | <b>859.451973</b> | 430.229625        | 842.425424        | 421.716350       | <b>841.441408</b> | 421.224342       | 7 |
| 4 | 484.312960        | <b>242.660118</b> | 467.286411        | 234.146844       | 466.302395     | 233.654836        | <b>I</b> | <b>730.409380</b> | 365.708328        | 713.382831        | 357.195054       | 712.398815        | 356.703046       | 6 |
| 5 | 613.355553        | 307.181415        | 596.329004        | 298.668140       | 595.344988     | 298.176132        | <b>E</b> | <b>617.325316</b> | 309.166296        | <b>600.298767</b> | 300.653022       | <b>599.314751</b> | 300.161014       | 5 |
| 6 | 726.439617        | 363.723447        | 709.413068        | 355.210172       | 708.429052     | <b>354.718164</b> | <b>I</b> | <b>488.282723</b> | 244.644999        | 471.256174        | 236.131725       | 470.272158        | 235.639717       | 4 |
| 7 | 855.482210        | 428.244743        | 838.455661        | 419.731469       | 837.471645     | 419.239461        | <b>E</b> | 375.198659        | 188.102967        | 358.172110        | 179.589693       | 357.188094        | 179.097685       | 3 |
| 8 | 926.519324        | 463.763300        | 909.492775        | 455.250026       | 908.508759     | 454.758018        | <b>A</b> | 246.156066        | 123.581671        | 229.129517        | 115.068396       |                   |                  | 2 |
| 9 |                   |                   |                   |                  |                |                   | <b>R</b> | <b>175.118952</b> | 88.063114         | 158.092403        | 79.549839        |                   |                  | 1 |

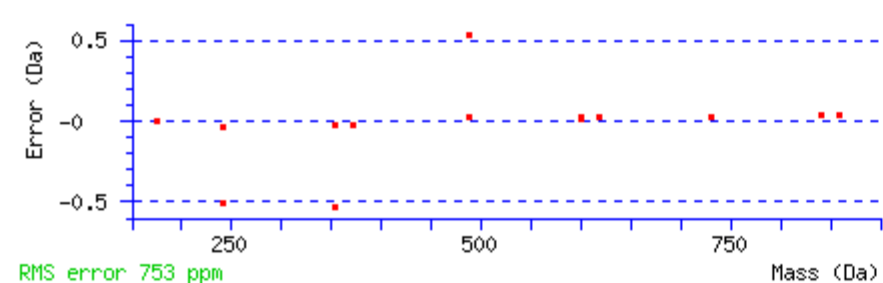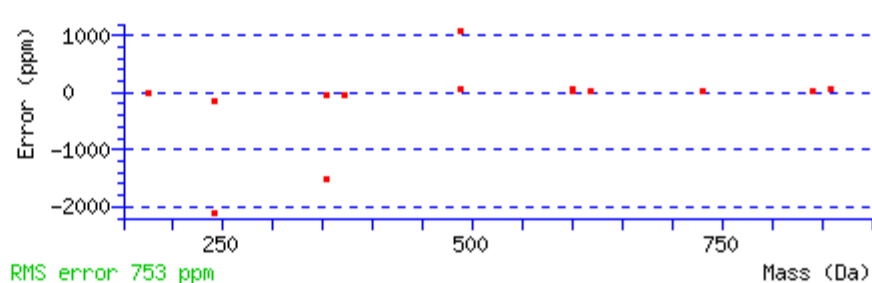

NCBI BLAST search of **KLEIEIEAR**

(Parameters: blastp, nr protein database, expect=20000, no filter, PAM30)

Other BLAST [web gateways](#)

All matches to this query

| Score | Mr(calc):   | Delta     | Sequence                   |
|-------|-------------|-----------|----------------------------|
| 30.9  | 1099.623672 | 0.004336  | <a href="#">KLEIEIEAR</a>  |
| 16.5  | 1099.634918 | -0.006910 | <a href="#">LKQENLSLR</a>  |
| 15.1  | 1099.631073 | -0.003065 | <a href="#">LEELMKPLK</a>  |
| 14.9  | 1099.634933 | -0.006925 | <a href="#">IQPLAKATSR</a> |
| 14.6  | 1099.634918 | -0.006910 | <a href="#">LGKALENLSR</a> |
| 13.6  | 1099.623703 | 0.004305  | <a href="#">KPQLLEQTK</a>  |
| 12.0  | 1099.634933 | -0.006925 | <a href="#">IQERVSKPK</a>  |
| 11.4  | 1099.623703 | 0.004305  | <a href="#">ELQKVQDIK</a>  |
| 9.3   | 1099.638962 | -0.010954 | <a href="#">KLQIYGPGPK</a> |
| 9.0   | 1099.623688 | 0.004320  | <a href="#">QLKNLVEEK</a>  |

Mascot: <http://www.matrixscience.com/>

**Mascot Search Results**

**Peptide View**

MS/MS Fragmentation of **ENITYLK**

Found in **ACACB\_HUMAN**, Acetyl-CoA carboxylase 2 OS=Homo sapiens GN=ACACB PE=1 SV=3

Match to Query 5970: 879.471648 from(440.743100,2+) rtinseconds(1790) index(19037)

Title: Locus:1.1.1.2010.8

Data file 2011-11-10 - TFD - EP 4-4.mgf

Click mouse within plot area to zoom in by factor of two about that point

Or, Plot from  to  Da

Label all possible matches  Label matches used for scoring

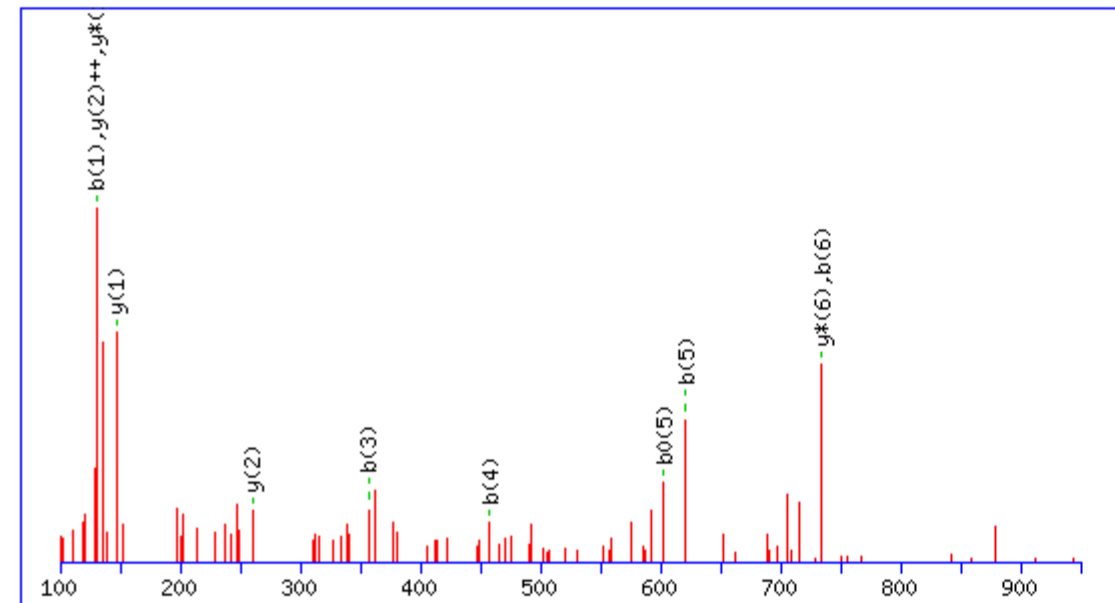

Monoisotopic mass of neutral peptide Mr(calc): 879.470154

Fixed modifications: Propionamide (C) (apply to specified residues or termini only)

Ions Score: 30 Expect: 0.0068

Matches : 11/64 fragment ions using 16 most intense peaks [\(help\)](#)

| # | b                 | b <sup>++</sup> | b <sup>*</sup> | b <sup>*++</sup> | b <sup>0</sup>    | b <sup>0++</sup> | Seq. | y                 | y <sup>++</sup>   | y <sup>*</sup>    | y <sup>*++</sup> | y <sup>0</sup> | y <sup>0++</sup> | # |
|---|-------------------|-----------------|----------------|------------------|-------------------|------------------|------|-------------------|-------------------|-------------------|------------------|----------------|------------------|---|
| 1 | <b>130.049869</b> | 65.528572       |                |                  | 112.039304        | 56.523290        | E    |                   |                   |                   |                  |                |                  | 7 |
| 2 | 244.092796        | 122.550036      | 227.066247     | 114.036762       | 226.082231        | 113.544754       | N    | 751.434867        | 376.221072        | <b>734.408318</b> | 367.707797       | 733.424302     | 367.215789       | 6 |
| 3 | <b>357.176860</b> | 179.092068      | 340.150311     | 170.578794       | 339.166295        | 170.086786       | I    | 637.391940        | 319.199608        | 620.365391        | 310.686334       | 619.381375     | 310.194326       | 5 |
| 4 | <b>458.224539</b> | 229.615908      | 441.197990     | 221.102633       | 440.213974        | 220.610625       | T    | 524.307876        | 262.657576        | 507.281327        | 254.144302       | 506.297311     | 253.652294       | 4 |
| 5 | <b>621.287868</b> | 311.147572      | 604.261319     | 302.634298       | <b>603.277303</b> | 302.142290       | Y    | 423.260197        | 212.133737        | 406.233648        | 203.620462       |                |                  | 3 |
| 6 | <b>734.371932</b> | 367.689604      | 717.345383     | 359.176330       | 716.361367        | 358.684322       | L    | <b>260.196868</b> | <b>130.602072</b> | 243.170319        | 122.088798       |                |                  | 2 |
| 7 |                   |                 |                |                  |                   |                  | K    | <b>147.112804</b> | 74.060040         | <b>130.086255</b> | 65.546765        |                |                  | 1 |

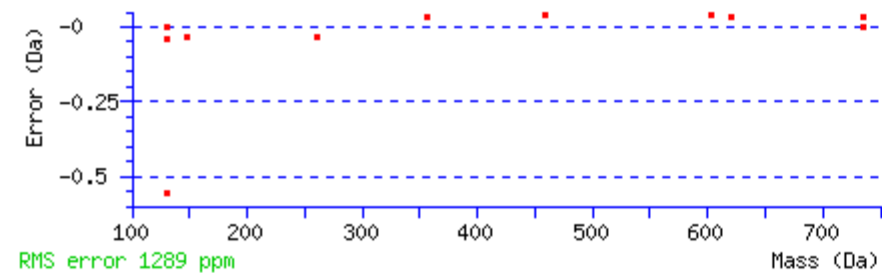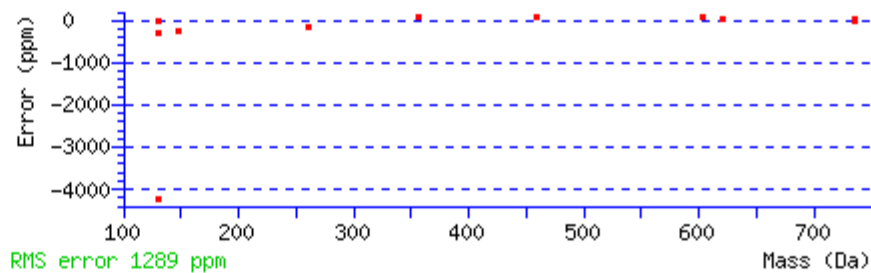

NCBI BLAST search of **ENITYLK**

(Parameters: blastp, nr protein database, expect=20000, no filter, PAM30)

Other BLAST [web gateways](#)

All matches to this query

| Score | Mr(calc):  | Delta    | Sequence                 |
|-------|------------|----------|--------------------------|
| 30.2  | 879.470154 | 0.001494 | <a href="#">ENITYLK</a>  |
| 22.8  | 879.470169 | 0.001479 | <a href="#">KLDITYLQ</a> |
| 22.8  | 879.470154 | 0.001494 | <a href="#">EQLSYLK</a>  |
| 22.5  | 879.470154 | 0.001494 | <a href="#">ENTIYLK</a>  |
| 12.8  | 879.470154 | 0.001494 | <a href="#">KSPEYLK</a>  |
| 12.8  | 879.470154 | 0.001494 | <a href="#">QLSEYLK</a>  |
| 12.6  | 879.470169 | 0.001479 | <a href="#">APEPLPPK</a> |
| 11.5  | 879.470169 | 0.001479 | <a href="#">APEPLPPK</a> |
| 11.1  | 879.470184 | 0.001464 | <a href="#">VDFASTLK</a> |
| 11.0  | 879.470184 | 0.001464 | <a href="#">SSSFVLPK</a> |

# Mascot Search Results

## Peptide View

MS/MS Fragmentation of **DNATCDGPCGLR**

Found in **ACRO\_HUMAN**, Acrosin OS=Homo sapiens GN=ACR PE=2 SV=4

Match to Query 33080: 1362.570968 from(682.292760,2+) rtinseconds(2030) index(23357)

Title: Locus:1.1.1.2261.41

Data file 2011-11-10 - TFD - EP 4-3.mgf

Click mouse within plot area to zoom in by factor of two about that point

Or, Plot from  to  Da

Label all possible matches  Label matches used for scoring

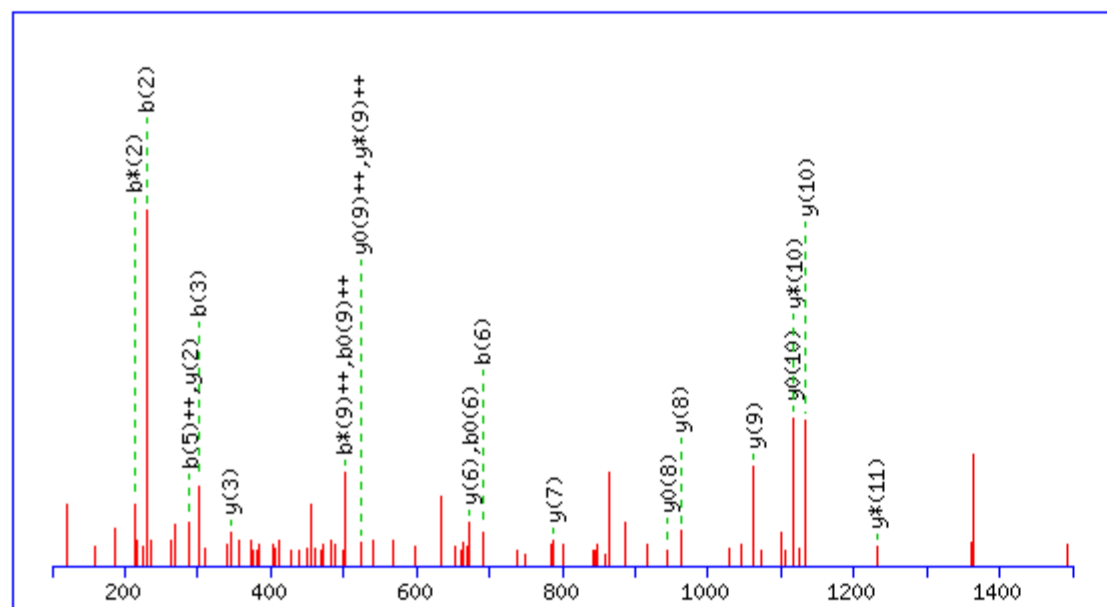

Monoisotopic mass of neutral peptide Mr(calc): 1362.565628

Fixed modifications: Propionamide (C) (apply to specified residues or termini only)

Ions Score: 37 Expect: 0.00056

Matches : 21/118 fragment ions using 33 most intense peaks ([help](#))

| #  | b                 | b <sup>++</sup>   | b <sup>*</sup>    | b <sup>+++</sup>  | b <sup>0</sup>    | b <sup>0++</sup>  | Seq. | y                  | y <sup>++</sup> | y <sup>*</sup>     | y <sup>+++</sup>  | y <sup>0</sup>     | y <sup>0++</sup>  | #  |
|----|-------------------|-------------------|-------------------|-------------------|-------------------|-------------------|------|--------------------|-----------------|--------------------|-------------------|--------------------|-------------------|----|
| 1  | 116.034219        | 58.520748         |                   |                   | 98.023654         | 49.515465         | D    |                    |                 |                    |                   |                    |                   | 12 |
| 2  | <b>230.077146</b> | 115.542211        | <b>213.050597</b> | 107.028937        | 212.066581        | 106.536928        | N    | 1248.545969        | 624.776622      | <b>1231.519420</b> | 616.263348        | 1230.535404        | 615.771340        | 11 |
| 3  | <b>301.114260</b> | 151.060768        | 284.087711        | 142.547494        | 283.103695        | 142.055486        | A    | <b>1134.503042</b> | 567.755159      | <b>1117.476493</b> | 559.241884        | <b>1116.492477</b> | 558.749876        | 10 |
| 4  | 402.161939        | 201.584608        | 385.135390        | 193.071333        | 384.151374        | 192.579325        | T    | <b>1063.465928</b> | 532.236602      | 1046.439379        | <b>523.723327</b> | 1045.455363        | <b>523.231319</b> | 9  |
| 5  | 576.208238        | <b>288.607757</b> | 559.181689        | 280.094483        | 558.197673        | 279.602475        | C    | <b>962.418249</b>  | 481.712762      | 945.391700         | 473.199488        | <b>944.407684</b>  | 472.707480        | 8  |
| 6  | <b>691.235181</b> | 346.121229        | 674.208632        | 337.607954        | <b>673.224616</b> | 337.115946        | D    | <b>788.371950</b>  | 394.689613      | 771.345401         | 386.176338        | 770.361385         | 385.684330        | 7  |
| 7  | 748.256645        | 374.631961        | 731.230096        | 366.118686        | 730.246080        | 365.626678        | G    | <b>673.345007</b>  | 337.176141      | 656.318458         | 328.662867        |                    |                   | 6  |
| 8  | 845.309409        | 423.158343        | 828.282860        | 414.645068        | 827.298844        | 414.153060        | P    | 616.323543         | 308.665409      | 599.296994         | 300.152135        |                    |                   | 5  |
| 9  | 1019.355708       | 510.181492        | 1002.329159       | <b>501.668218</b> | 1001.345143       | <b>501.176210</b> | C    | 519.270779         | 260.139027      | 502.244230         | 251.625753        |                    |                   | 4  |
| 10 | 1076.377172       | 538.692224        | 1059.350623       | 530.178950        | 1058.366607       | 529.686941        | G    | <b>345.224480</b>  | 173.115878      | 328.197931         | 164.602603        |                    |                   | 3  |
| 11 | 1189.461236       | 595.234256        | 1172.434687       | 586.720981        | 1171.450671       | 586.228973        | L    | <b>288.203016</b>  | 144.605146      | 271.176467         | 136.091871        |                    |                   | 2  |
| 12 |                   |                   |                   |                   |                   |                   | R    | 175.118952         | 88.063114       | 158.092403         | 79.549839         |                    |                   | 1  |

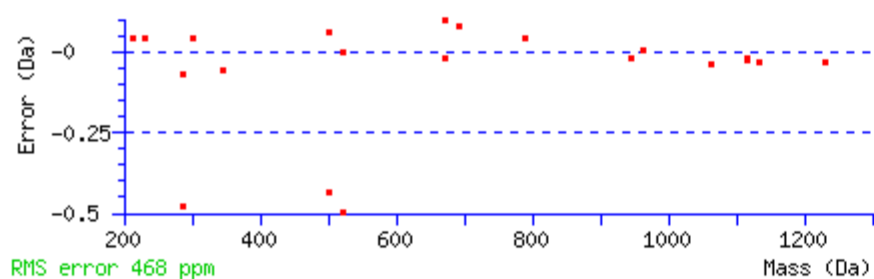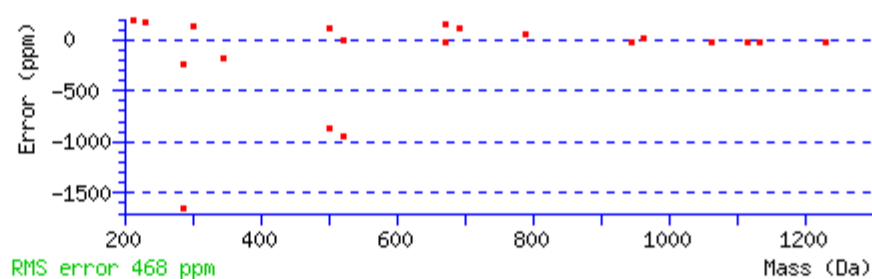

NCBI BLAST search of [DNATCDGPCGLR](#)

(Parameters: blastp, nr protein database, expect=20000, no filter, PAM30)

Other BLAST [web gateways](#)

All matches to this query

| Score | Mr(calc):   | Delta    | Sequence                     |
|-------|-------------|----------|------------------------------|
| 37.2  | 1362.565628 | 0.005340 | <a href="#">DNATCDGPCGLR</a> |

Mascot: <http://www.matrixscience.com/>



# MASCOT Search Results

## Peptide View

MS/MS Fragmentation of **TLESSIQGLR**

Found in **ARCI1A\_HUMAN**, Actin-related protein 2/3 complex subunit 1A OS=Homo sapiens GN=ARPC1A PE=1 SV=2

Match to Query 15219: 1102.595748 from(552.305150,2+) rtinseconds(2239) index(27224)

Title: Locus:1.1.1.1234.15

Data file 2012-01-27 - TFD - Epitel - IEC - 10ul - 2.mgf

Click mouse within plot area to zoom in by factor of two about that point

Or, Plot from  to  Da

Label all possible matches  Label matches used for scoring

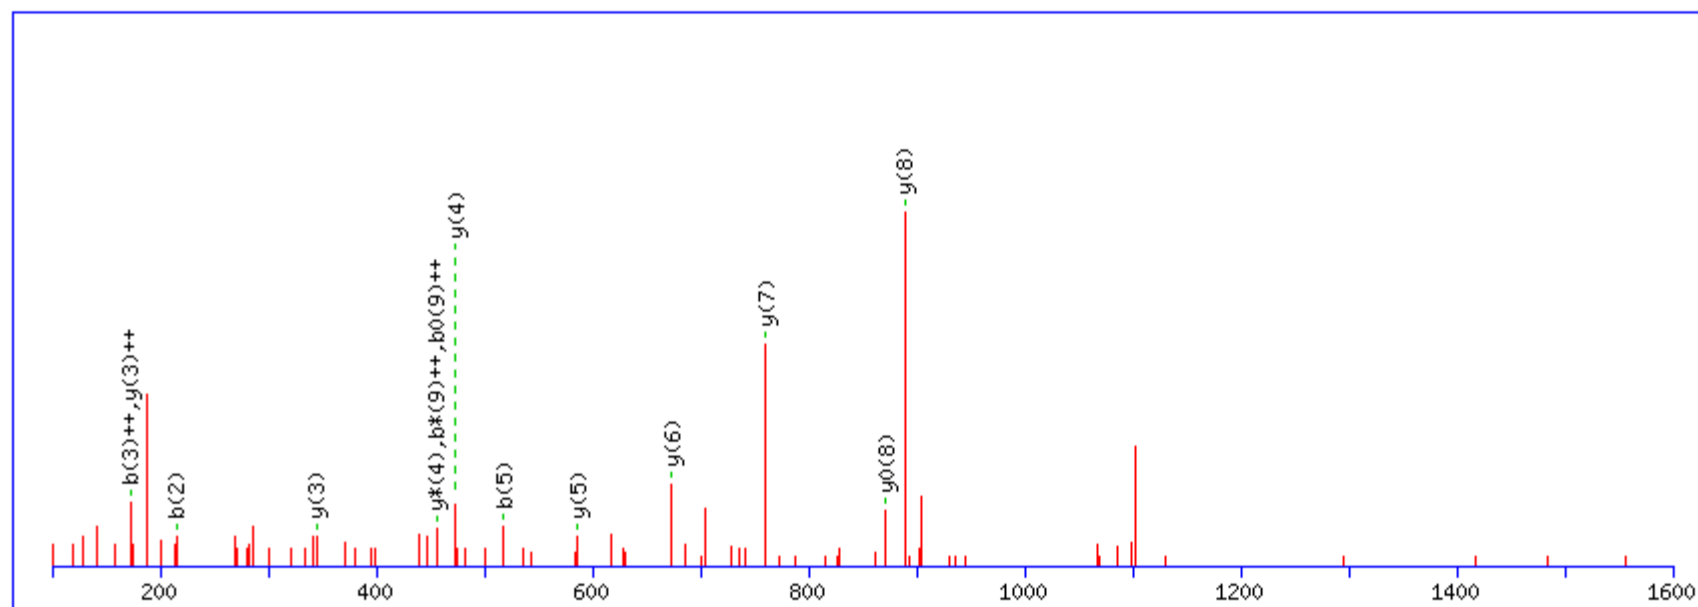

Monoisotopic mass of neutral peptide Mr(calc): 1102.598221

Fixed modifications: Carbamidomethyl (C) (apply to specified residues or termini only)

Ions Score: 38 Expect: 0.0018

Matches : 14/86 fragment ions using 20 most intense peaks [\(help\)](#)

| #  | b                 | b <sup>++</sup>   | b <sup>*</sup> | b <sup>*++</sup>  | b <sup>0</sup> | b <sup>0++</sup>  | Seq. | y                 | y <sup>++</sup>   | y <sup>*</sup>    | y <sup>*++</sup> | y <sup>0</sup>    | y <sup>0++</sup> | #  |
|----|-------------------|-------------------|----------------|-------------------|----------------|-------------------|------|-------------------|-------------------|-------------------|------------------|-------------------|------------------|----|
| 1  | 102.054955        | 51.531116         |                |                   | 84.044390      | 42.525833         | T    |                   |                   |                   |                  |                   |                  | 10 |
| 2  | <b>215.139019</b> | 108.073147        |                |                   | 197.128454     | 99.067865         | L    | 1002.557835       | 501.782556        | 985.531286        | 493.269281       | 984.547270        | 492.777273       | 9  |
| 3  | 344.181612        | <b>172.594444</b> |                |                   | 326.171047     | 163.589162        | E    | <b>889.473771</b> | 445.240524        | 872.447222        | 436.727249       | <b>871.463206</b> | 436.235241       | 8  |
| 4  | 431.213640        | 216.110458        |                |                   | 413.203075     | 207.105176        | S    | <b>760.431178</b> | 380.719227        | 743.404629        | 372.205953       | 742.420613        | 371.713945       | 7  |
| 5  | <b>518.245668</b> | 259.626472        |                |                   | 500.235103     | 250.621190        | S    | <b>673.399150</b> | 337.203213        | 656.372601        | 328.689939       | 655.388585        | 328.197931       | 6  |
| 6  | 631.329732        | 316.168504        |                |                   | 613.319167     | 307.163222        | I    | <b>586.367122</b> | 293.687199        | 569.340573        | 285.173925       |                   |                  | 5  |
| 7  | 759.388310        | 380.197793        | 742.361761     | 371.684519        | 741.377745     | 371.192511        | Q    | <b>473.283058</b> | 237.145167        | <b>456.256509</b> | 228.631892       |                   |                  | 4  |
| 8  | 816.409774        | 408.708525        | 799.383225     | 400.195251        | 798.399209     | 399.703243        | G    | <b>345.224480</b> | <b>173.115878</b> | 328.197931        | 164.602603       |                   |                  | 3  |
| 9  | 929.493838        | 465.250557        | 912.467289     | <b>456.737283</b> | 911.483273     | <b>456.245275</b> | L    | 288.203016        | 144.605146        | 271.176467        | 136.091871       |                   |                  | 2  |
| 10 |                   |                   |                |                   |                |                   | R    | 175.118952        | 88.063114         | 158.092403        | 79.549839        |                   |                  | 1  |

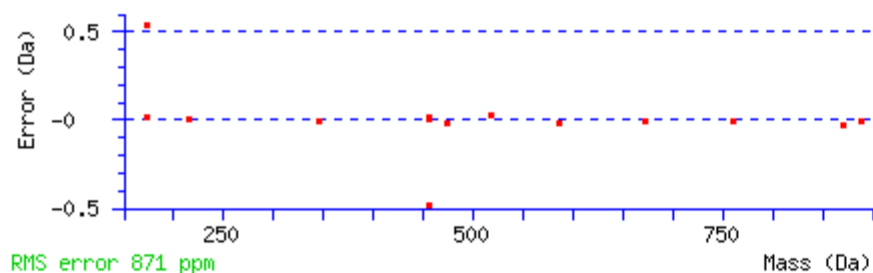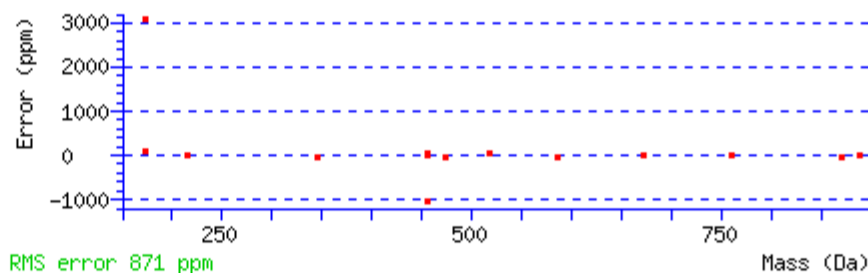

NCBI BLAST search of **TLESSIQGLR**

(Parameters: blastp, nr protein database, expect=20000, no filter, PAM30)

Other BLAST [web gateways](#)

## All matches to this query

| Score | Mr(calc):   | Delta     | Sequence                   |
|-------|-------------|-----------|----------------------------|
| 37.9  | 1102.598221 | -0.002473 | <a href="#">TLESSIQGLR</a> |
| 8.3   | 1102.598221 | -0.002473 | <a href="#">TLESQLASVR</a> |
| 1.3   | 1102.598206 | -0.002458 | <a href="#">SISIETANLR</a> |

**MATRIX SCIENCE Mascot Search Results**

**Peptide View**

MS/MS Fragmentation of **KVIELTGDVTPDMK**

Found in **HELIC1\_HUMAN**, Activating signal cointegrator 1 complex subunit 3 OS=Homo sapiens GN=ASCC3 PE=1 SV=3

Match to Query 47812: 1560.795702 from(521.272510,3+) rtinseconds(2663) index(33849)

Title: Locus:1.1.1.2335.10

Data file 2011-11-14 - TFD - EP 8-5.mgf

Click mouse within plot area to zoom in by factor of two about that point

Or, Plot from  to  Da

Label all possible matches  Label matches used for scoring

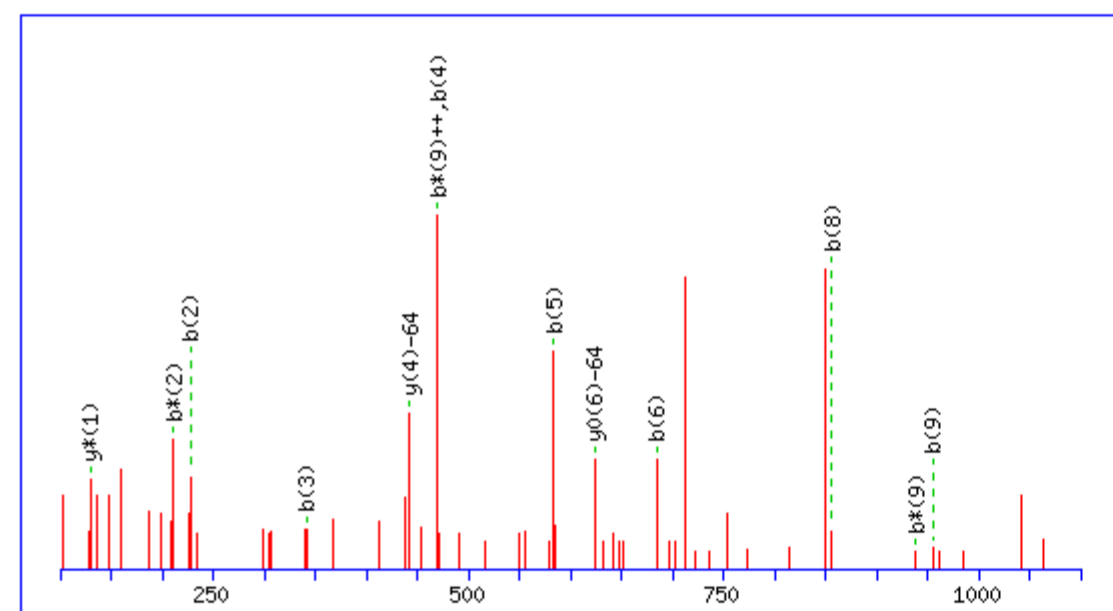

Monoisotopic mass of neutral peptide Mr(calc): 1560.806915

Fixed modifications: Propionamide (C) (apply to specified residues or termini only)

Variable modifications:

M13 : Oxidation (M), with neutral losses 63.998285 (shown in table), 0.000000

Ions Score: 36 Expect: 0.00089

Matches : 13/222 fragment ions using 20 most intense peaks [\(help\)](#)

| #  | b                 | b <sup>++</sup> | b*                | b <sup>+++</sup>  | b <sup>0</sup> | b <sup>0++</sup> | Seq.     | y                 | y <sup>++</sup> | y*                | y <sup>+++</sup> | y <sup>0</sup>    | y <sup>0++</sup> | #         |
|----|-------------------|-----------------|-------------------|-------------------|----------------|------------------|----------|-------------------|-----------------|-------------------|------------------|-------------------|------------------|-----------|
| 1  | 129.102239        | 65.054757       | 112.075690        | 56.541483         |                |                  | <b>K</b> |                   |                 |                   |                  |                   |                  | <b>14</b> |
| 2  | <b>228.170653</b> | 114.588965      | <b>211.144104</b> | 106.075690        |                |                  | <b>V</b> | 1369.720940       | 685.364108      | 1352.694391       | 676.850834       | 1351.710375       | 676.358826       | <b>13</b> |
| 3  | <b>341.254717</b> | 171.130997      | 324.228168        | 162.617722        |                |                  | <b>I</b> | 1270.652526       | 635.829901      | 1253.625977       | 627.316627       | 1252.641961       | 626.824619       | <b>12</b> |
| 4  | <b>470.297310</b> | 235.652293      | 453.270761        | 227.139019        | 452.286745     | 226.647011       | <b>E</b> | 1157.568462       | 579.287869      | 1140.541913       | 570.774595       | 1139.557897       | 570.282587       | <b>11</b> |
| 5  | <b>583.381374</b> | 292.194325      | 566.354825        | 283.681051        | 565.370809     | 283.189043       | <b>L</b> | 1028.525869       | 514.766573      | 1011.499320       | 506.253298       | 1010.515304       | 505.761290       | <b>10</b> |
| 6  | <b>684.429053</b> | 342.718165      | 667.402504        | 334.204890        | 666.418488     | 333.712882       | <b>T</b> | 915.441805        | 458.224541      | 898.415256        | 449.711266       | 897.431240        | 449.219258       | <b>9</b>  |
| 7  | 741.450517        | 371.228897      | 724.423968        | 362.715622        | 723.439952     | 362.223614       | <b>G</b> | 814.394126        | 407.700701      | 797.367577        | 399.187427       | 796.383561        | 398.695419       | <b>8</b>  |
| 8  | <b>856.477460</b> | 428.742368      | 839.450911        | 420.229094        | 838.466895     | 419.737086       | <b>D</b> | 757.372662        | 379.189969      | 740.346113        | 370.676695       | 739.362097        | 370.184687       | <b>7</b>  |
| 9  | <b>955.545874</b> | 478.276575      | <b>938.519325</b> | <b>469.763301</b> | 937.535309     | 469.271293       | <b>V</b> | 642.345719        | 321.676498      | 625.319170        | 313.163223       | <b>624.335154</b> | 312.671215       | <b>6</b>  |
| 10 | 1056.593553       | 528.800414      | 1039.567004       | 520.287140        | 1038.582988    | 519.795132       | <b>T</b> | 543.277305        | 272.142291      | 526.250756        | 263.629016       | 525.266740        | 263.137008       | <b>5</b>  |
| 11 | 1153.646317       | 577.326797      | 1136.619768       | 568.813522        | 1135.635752    | 568.321514       | <b>P</b> | <b>442.229626</b> | 221.618451      | 425.203077        | 213.105177       | 424.219061        | 212.613169       | <b>4</b>  |
| 12 | 1268.673260       | 634.840268      | 1251.646711       | 626.326994        | 1250.662695    | 625.834986       | <b>D</b> | 345.176862        | 173.092069      | 328.150313        | 164.578795       | 327.166297        | 164.086787       | <b>3</b>  |
| 13 | 1351.710375       | 676.358826      | 1334.683826       | 667.845551        | 1333.699810    | 667.353543       | <b>M</b> | 230.149919        | 115.578597      | 213.123370        | 107.065323       |                   |                  | <b>2</b>  |
| 14 |                   |                 |                   |                   |                |                  | <b>K</b> | 147.112804        | 74.060040       | <b>130.086255</b> | 65.546765        |                   |                  | <b>1</b>  |

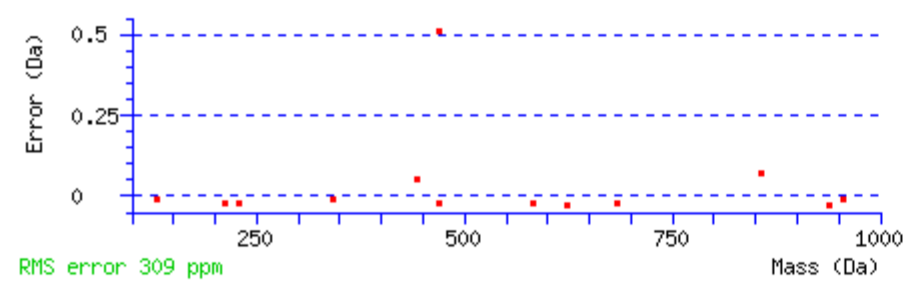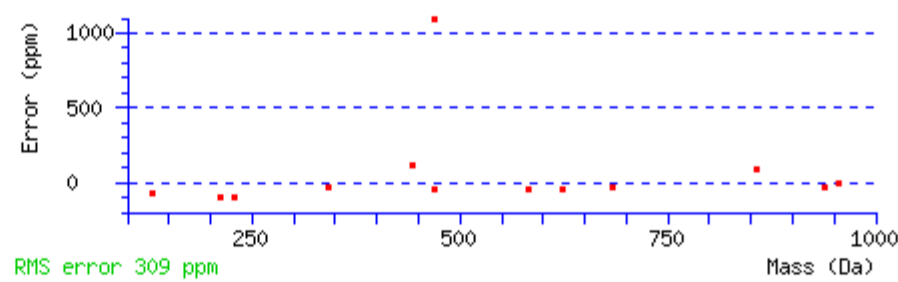

NCBI BLAST search of [KVIELTGDVTPDMK](#)

(Parameters: blastp, nr protein database, expect=20000, no filter, PAM30)

Other BLAST [web gateways](#)

**All matches to this query**

| Score | Mr(calc):   | Delta     | Sequence                       |
|-------|-------------|-----------|--------------------------------|
| 35.8  | 1560.806915 | -0.011213 | <a href="#">KVIELTGDVTPDMK</a> |
| 34.5  | 1560.806915 | -0.011213 | <a href="#">KVIELTGDVTPDMK</a> |
| 34.4  | 1560.793594 | 0.002108  | <a href="#">ARLEIEPEWAYGK</a>  |
| 3.1   | 1560.804199 | -0.008497 | <a href="#">INLNESMQVVSRR</a>  |
| 0.4   | 1560.783081 | 0.012621  | <a href="#">KPRCGVPDVANYR</a>  |



**Peptide View**

MS/MS Fragmentation of **VFTTQELVQAFTHAPATLEADR**

Found in **AHSA1\_HUMAN**, Activator of 90 kDa heat shock protein ATPase homolog 1 OS=Homo sapiens GN=AHSA1 PE=1 SV=1

Match to Query 72188: 2444.241222 from(815.754350,3+) rtinseconds(4107) index(62376)

Title: Locus:1.1.1.2852.29

Data file 2011-11-12 - TFD - EP 6-4.mgf

Click mouse within plot area to zoom in by factor of two about that point

Or, Plot from  to  Da

Label all possible matches  Label matches used for scoring

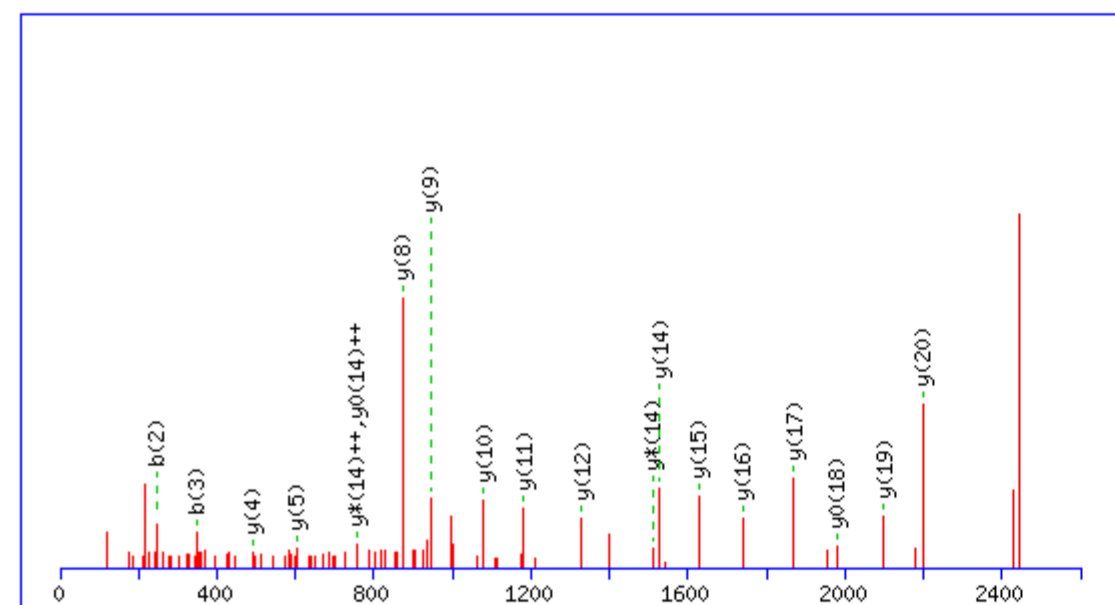

Monoisotopic mass of neutral peptide Mr(calc): 2444.233597

Fixed modifications: Propionamide (C) (apply to specified residues or termini only)

Ions Score: 124 Expect: 4.6e-012

Matches : 19/238 fragment ions using 21 most intense peaks [\(help\)](#)

| #  | b                 | b <sup>++</sup> | b <sup>+</sup> | b <sup>+++</sup> | b <sup>0</sup> | b <sup>0++</sup> | Seq. | y                  | y <sup>++</sup> | y <sup>+</sup>     | y <sup>+++</sup>  | y <sup>0</sup>     | y <sup>0++</sup>  | #  |
|----|-------------------|-----------------|----------------|------------------|----------------|------------------|------|--------------------|-----------------|--------------------|-------------------|--------------------|-------------------|----|
| 1  | 100.075690        | 50.541483       |                |                  |                |                  | V    |                    |                 |                    |                   |                    |                   | 22 |
| 2  | <b>247.144104</b> | 124.075690      |                |                  |                |                  | F    | 2346.172455        | 1173.589865     | 2329.145906        | 1165.076591       | 2328.161890        | 1164.584583       | 21 |
| 3  | <b>348.191783</b> | 174.599529      |                |                  | 330.181218     | 165.594247       | T    | <b>2199.104041</b> | 1100.055658     | 2182.077492        | 1091.542384       | 2181.093476        | 1091.050376       | 20 |
| 4  | 449.239462        | 225.123369      |                |                  | 431.228897     | 216.118087       | T    | <b>2098.056362</b> | 1049.531819     | 2081.029813        | 1041.018544       | 2080.045797        | 1040.526536       | 19 |
| 5  | 577.298040        | 289.152658      | 560.271491     | 280.639384       | 559.287475     | 280.147376       | Q    | 1997.008683        | 999.007980      | 1979.982134        | 990.494705        | <b>1978.998118</b> | 990.002697        | 18 |
| 6  | 706.340633        | 353.673955      | 689.314084     | 345.160680       | 688.330068     | 344.668672       | E    | <b>1868.950105</b> | 934.978690      | 1851.923556        | 926.465416        | 1850.939540        | 925.973408        | 17 |
| 7  | 819.424697        | 410.215987      | 802.398148     | 401.702712       | 801.414132     | 401.210704       | L    | <b>1739.907512</b> | 870.457394      | 1722.880963        | 861.944120        | 1721.896947        | 861.452112        | 16 |
| 8  | 918.493111        | 459.750194      | 901.466562     | 451.236919       | 900.482546     | 450.744911       | V    | <b>1626.823448</b> | 813.915362      | 1609.796899        | 805.402087        | 1608.812883        | 804.910079        | 15 |
| 9  | 1046.551689       | 523.779483      | 1029.525140    | 515.266208       | 1028.541124    | 514.774200       | Q    | <b>1527.755034</b> | 764.381155      | <b>1510.728485</b> | <b>755.867881</b> | 1509.744469        | <b>755.375873</b> | 14 |
| 10 | 1117.588803       | 559.298040      | 1100.562254    | 550.784765       | 1099.578238    | 550.292757       | A    | 1399.696456        | 700.351866      | 1382.669907        | 691.838592        | 1381.685891        | 691.346583        | 13 |
| 11 | 1264.657217       | 632.832247      | 1247.630668    | 624.318972       | 1246.646652    | 623.826964       | F    | <b>1328.659342</b> | 664.833309      | 1311.632793        | 656.320035        | 1310.648777        | 655.828026        | 12 |
| 12 | 1365.704896       | 683.356086      | 1348.678347    | 674.842812       | 1347.694331    | 674.350804       | T    | <b>1181.590928</b> | 591.299102      | 1164.564379        | 582.785827        | 1163.580363        | 582.293819        | 11 |
| 13 | 1502.763808       | 751.885542      | 1485.737259    | 743.372268       | 1484.753243    | 742.880260       | H    | <b>1080.543249</b> | 540.775262      | 1063.516700        | 532.261988        | 1062.532684        | 531.769980        | 10 |
| 14 | 1573.800922       | 787.404099      | 1556.774373    | 778.890825       | 1555.790357    | 778.398817       | A    | <b>943.484337</b>  | 472.245806      | 926.457788         | 463.732532        | 925.473772         | 463.240524        | 9  |
| 15 | 1670.853686       | 835.930481      | 1653.827137    | 827.417207       | 1652.843121    | 826.925199       | P    | <b>872.447223</b>  | 436.727249      | 855.420674         | 428.213975        | 854.436658         | 427.721967        | 8  |
| 16 | 1741.890800       | 871.449038      | 1724.864251    | 862.935764       | 1723.880235    | 862.443756       | A    | 775.394459         | 388.200867      | 758.367910         | 379.687593        | 757.383894         | 379.195585        | 7  |
| 17 | 1842.938479       | 921.972878      | 1825.911930    | 913.459603       | 1824.927914    | 912.967595       | T    | 704.357345         | 352.682310      | 687.330796         | 344.169036        | 686.346780         | 343.677028        | 6  |
| 18 | 1956.022543       | 978.514910      | 1938.995994    | 970.001635       | 1938.011978    | 969.509627       | L    | <b>603.309666</b>  | 302.158471      | 586.283117         | 293.645196        | 585.299101         | 293.153188        | 5  |
| 19 | 2085.065136       | 1043.036206     | 2068.038587    | 1034.522931      | 2067.054571    | 1034.030923      | E    | <b>490.225602</b>  | 245.616439      | 473.199053         | 237.103164        | 472.215037         | 236.611156        | 4  |
| 20 | 2156.102250       | 1078.554763     | 2139.075701    | 1070.041488      | 2138.091685    | 1069.549480      | A    | 361.183009         | 181.095142      | 344.156460         | 172.581868        | 343.172444         | 172.089860        | 3  |
| 21 | 2271.129193       | 1136.068234     | 2254.102644    | 1127.554960      | 2253.118628    | 1127.062952      | D    | 290.145895         | 145.576585      | 273.119346         | 137.063311        | 272.135330         | 136.571303        | 2  |
| 22 |                   |                 |                |                  |                |                  | R    | 175.118952         | 88.063114       | 158.092403         | 79.549839         |                    |                   | 1  |

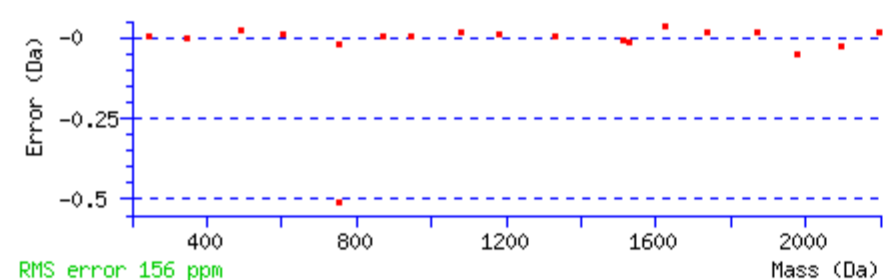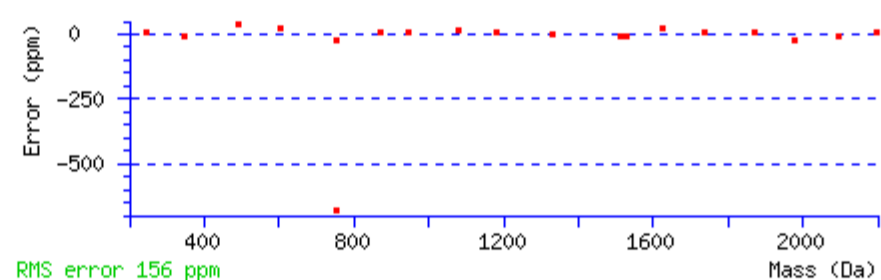

NCBI BLAST search of **VFTTQELVQAFTHAPATLEADR**  
(Parameters: blastp, nr protein database, expect=20000, no filter, PAM30)

Other BLAST [web gateways](#)

**All matches to this query**

| Score | Mr(calc):   | Delta     | Sequence                               |
|-------|-------------|-----------|----------------------------------------|
| 123.5 | 2444.233597 | 0.007625  | <a href="#">VFTTQELVQAFTHAPATLEADR</a> |
| 2.4   | 2444.263443 | -0.022221 | <a href="#">VFAKPFLASLDGHRDGVNCLAK</a> |
| 0.0   | 2444.236954 | 0.004268  | <a href="#">MVRGELVDESGGSPLEWIGLIR</a> |

# MASCOT Search Results

## Peptide View

MS/MS Fragmentation of **KPPGSLLPK**

Found in **ACD11\_HUMAN**, Acyl-CoA dehydrogenase family member 11 OS=Homo sapiens GN=ACAD11 PE=1 SV=2

Match to Query 13611: 967.572168 from(484.793360,2+) rtinseconds(2914) index(40243)

Title: Locus:1.1.1.2405.3

Data file 2011-11-12 - TFD - EP 6-4.mgf

Click mouse within plot area to zoom in by factor of two about that point

Or, Plot from  to  Da

Label all possible matches  Label matches used for scoring

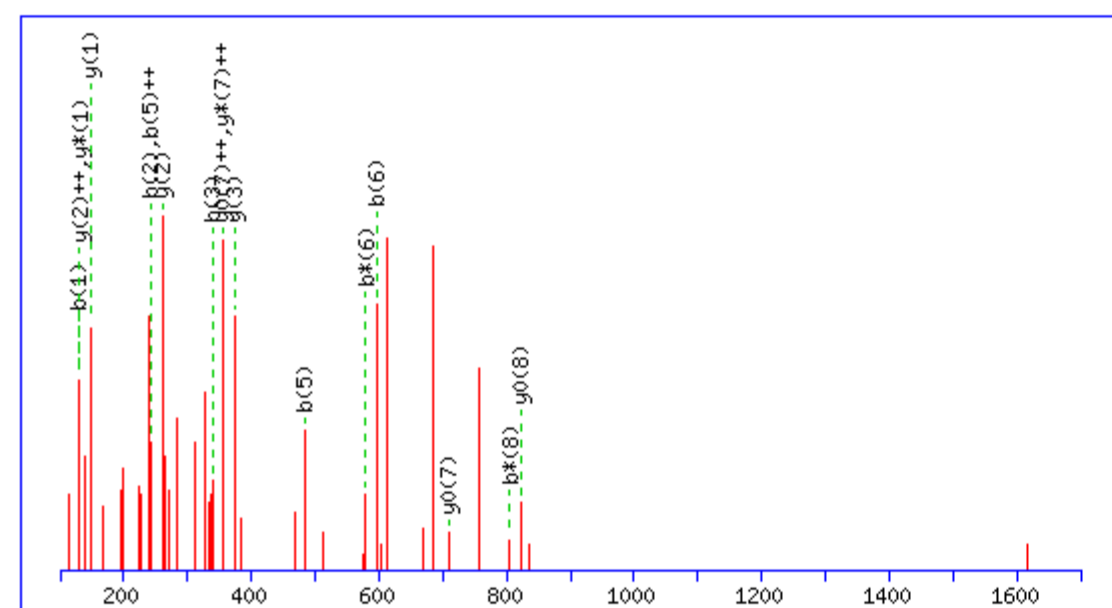

Monoisotopic mass of neutral peptide Mr(calc): 967.570221

Fixed modifications: Propionamide (C) (apply to specified residues or termini only)

Variable modifications:

P2 : Oxidation (P)

P8 : Oxidation (P)

Ions Score: 48 Expect: 7.7e-005

Matches : 20/80 fragment ions using 26 most intense peaks [\(help\)](#)

| # | b                 | b <sup>++</sup>   | b <sup>+</sup>    | b <sup>*++</sup> | b <sup>0</sup> | b <sup>0++</sup> | Seq.     | y                 | y <sup>++</sup>   | y <sup>+</sup>    | y <sup>*++</sup>  | y <sup>0</sup>    | y <sup>0++</sup>  | # |
|---|-------------------|-------------------|-------------------|------------------|----------------|------------------|----------|-------------------|-------------------|-------------------|-------------------|-------------------|-------------------|---|
| 1 | <b>129.102239</b> | 65.054757         | 112.075690        | 56.541483        |                |                  | <b>K</b> |                   |                   |                   |                   |                   |                   | 9 |
| 2 | <b>242.149918</b> | 121.578597        | 225.123369        | 113.065322       |                |                  | <b>P</b> | 840.482546        | 420.744911        | 823.455997        | 412.231637        | <b>822.471981</b> | 411.739629        | 8 |
| 3 | <b>339.202682</b> | 170.104979        | 322.176133        | 161.591704       |                |                  | <b>P</b> | 727.434867        | 364.221072        | 710.408318        | <b>355.707797</b> | <b>709.424302</b> | <b>355.215789</b> | 7 |
| 4 | 396.224146        | 198.615711        | 379.197597        | 190.102436       |                |                  | <b>G</b> | 630.382103        | 315.694690        | 613.355554        | 307.181415        | 612.371538        | 306.689407        | 6 |
| 5 | <b>483.256174</b> | <b>242.131725</b> | 466.229625        | 233.618450       | 465.245609     | 233.126442       | <b>S</b> | 573.360639        | 287.183958        | 556.334090        | 278.670683        | 555.350074        | 278.178675        | 5 |
| 6 | <b>596.340238</b> | 298.673757        | <b>579.313689</b> | 290.160483       | 578.329673     | 289.668475       | <b>L</b> | 486.328611        | 243.667944        | 469.302062        | 235.154669        |                   |                   | 4 |
| 7 | <b>709.424302</b> | <b>355.215789</b> | 692.397753        | 346.702515       | 691.413737     | 346.210507       | <b>L</b> | <b>373.244547</b> | 187.125912        | 356.217998        | 178.612637        |                   |                   | 3 |
| 8 | <b>822.471981</b> | 411.739629        | <b>805.445432</b> | 403.226354       | 804.461416     | 402.734346       | <b>P</b> | <b>260.160483</b> | <b>130.583879</b> | 243.133934        | 122.070605        |                   |                   | 2 |
| 9 |                   |                   |                   |                  |                |                  | <b>K</b> | <b>147.112804</b> | 74.060040         | <b>130.086255</b> | 65.546765         |                   |                   | 1 |

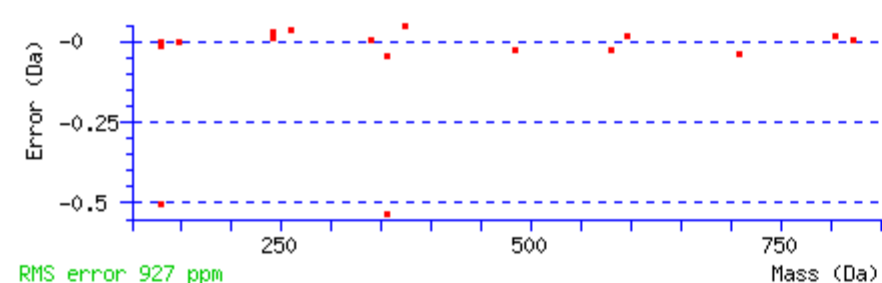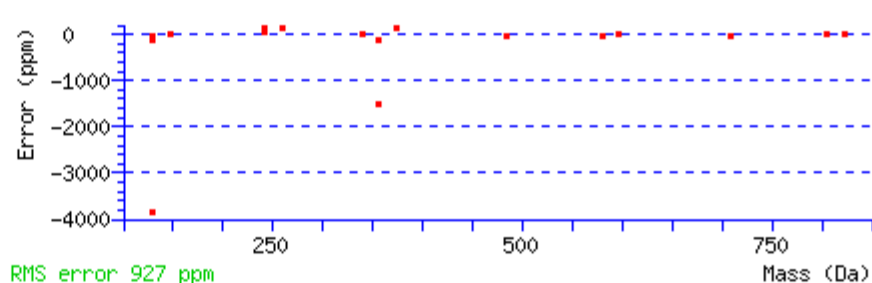

NCBI BLAST search of [KPPGSLLPK](#)

(Parameters: blastp, nr protein database, expect=20000, no filter, PAM30)

Other BLAST [web gateways](#)

## All matches to this query

| Score | Mr(calc):  | Delta     | Sequence                  |
|-------|------------|-----------|---------------------------|
| 47.8  | 967.570221 | 0.001947  | <a href="#">KPPGSLLPK</a> |
| 36.7  | 967.570221 | 0.001947  | <a href="#">KPPGSLLPK</a> |
| 34.9  | 967.570221 | 0.001947  | <a href="#">KLKPPPPK</a>  |
| 33.1  | 967.570221 | 0.001947  | <a href="#">KIPPPKPK</a>  |
| 27.6  | 967.570236 | 0.001932  | <a href="#">KTPGPVLPK</a> |
| 23.8  | 967.570221 | 0.001947  | <a href="#">APGKLPLPK</a> |
| 22.3  | 967.570221 | 0.001947  | <a href="#">GPSLIPQIK</a> |
| 20.0  | 967.570221 | 0.001947  | <a href="#">AVLNPTPIK</a> |
| 18.4  | 967.581436 | -0.009268 | <a href="#">ARSAPPLK</a>  |
| 18.4  | 967.570221 | 0.001947  | <a href="#">VSPKLAPPK</a> |







# MASCOT Search Results

## Peptide View

MS/MS Fragmentation of **GISEQEGKIK**

Found in **ADCY8\_HUMAN**, Adenylate cyclase type 8 OS=Homo sapiens GN=ADCY8 PE=1 SV=1

Match to Query 21377: 1087.587408 from(544.800980,2+) rtinseconds(785) index(607)

Title: Locus:1.1.1.1627.23

Data file 2011-11-10 - TFD - EP 4-4.mgf

Click mouse within plot area to zoom in by factor of two about that point

Or, Plot from  to  Da

Label all possible matches  Label matches used for scoring

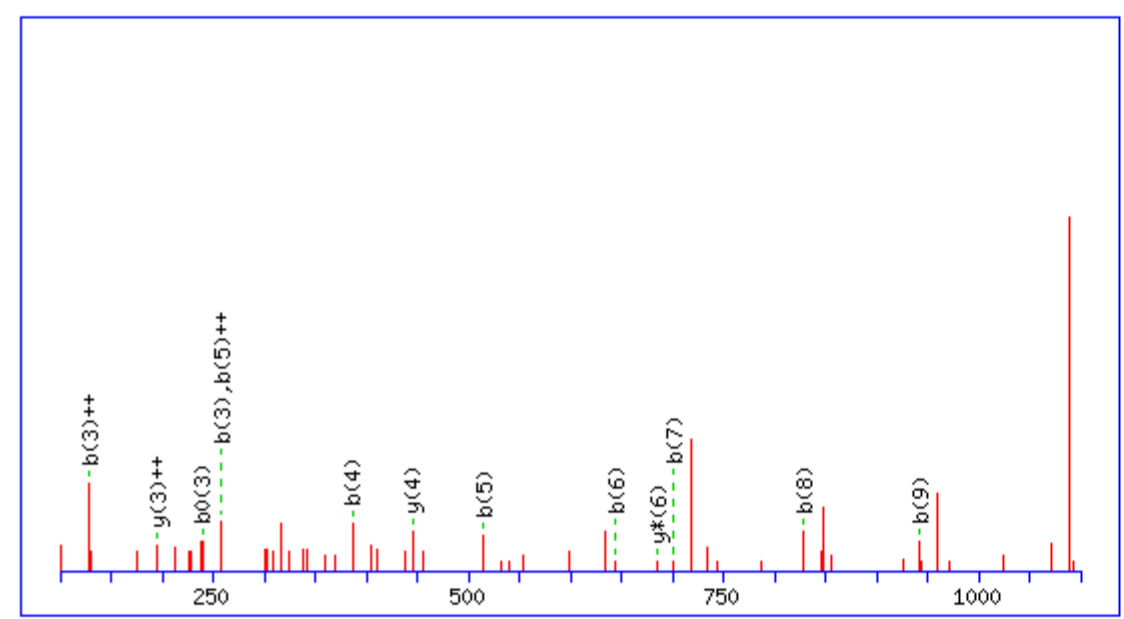

Monoisotopic mass of neutral peptide  $M_r(\text{calc})$ : 1087.587311

Fixed modifications: Propionamide (C) (apply to specified residues or termini only)

Ions Score: 31 Expect: 0.011

Matches : 13/88 fragment ions using 29 most intense peaks [\(help\)](#)

| #  | b                 | b <sup>++</sup>   | b <sup>*</sup> | b <sup>*++</sup> | b <sup>0</sup>    | b <sup>0++</sup> | Seq.     | y                 | y <sup>++</sup>   | y <sup>*</sup>    | y <sup>*++</sup> | y <sup>0</sup> | y <sup>0++</sup> | #         |
|----|-------------------|-------------------|----------------|------------------|-------------------|------------------|----------|-------------------|-------------------|-------------------|------------------|----------------|------------------|-----------|
| 1  | 58.028740         | 29.518008         |                |                  |                   |                  | <b>G</b> |                   |                   |                   |                  |                |                  | <b>10</b> |
| 2  | 171.112804        | 86.060040         |                |                  |                   |                  | <b>I</b> | 1031.573151       | 516.290214        | 1014.546602       | 507.776939       | 1013.562586    | 507.284931       | <b>9</b>  |
| 3  | <b>258.144832</b> | <b>129.576054</b> |                |                  | <b>240.134267</b> | 120.570772       | <b>S</b> | 918.489087        | 459.748182        | 901.462538        | 451.234907       | 900.478522     | 450.742899       | <b>8</b>  |
| 4  | <b>387.187425</b> | 194.097351        |                |                  | 369.176860        | 185.092068       | <b>E</b> | 831.457059        | 416.232168        | 814.430510        | 407.718893       | 813.446494     | 407.226885       | <b>7</b>  |
| 5  | <b>515.246003</b> | <b>258.126640</b> | 498.219454     | 249.613365       | 497.235438        | 249.121357       | <b>Q</b> | 702.414466        | 351.710871        | <b>685.387917</b> | 343.197597       | 684.403901     | 342.705589       | <b>6</b>  |
| 6  | <b>644.288596</b> | 322.647936        | 627.262047     | 314.134662       | 626.278031        | 313.642654       | <b>E</b> | 574.355888        | 287.681582        | 557.329339        | 279.168308       | 556.345323     | 278.676300       | <b>5</b>  |
| 7  | <b>701.310060</b> | 351.158668        | 684.283511     | 342.645394       | 683.299495        | 342.153386       | <b>G</b> | <b>445.313295</b> | 223.160286        | 428.286746        | 214.647011       |                |                  | <b>4</b>  |
| 8  | <b>829.405023</b> | 415.206150        | 812.378474     | 406.692875       | 811.394458        | 406.200867       | <b>K</b> | 388.291831        | <b>194.649554</b> | 371.265282        | 186.136279       |                |                  | <b>3</b>  |
| 9  | <b>942.489087</b> | 471.748182        | 925.462538     | 463.234907       | 924.478522        | 462.742899       | <b>I</b> | 260.196868        | 130.602072        | 243.170319        | 122.088798       |                |                  | <b>2</b>  |
| 10 |                   |                   |                |                  |                   |                  | <b>K</b> | 147.112804        | 74.060040         | 130.086255        | 65.546765        |                |                  | <b>1</b>  |

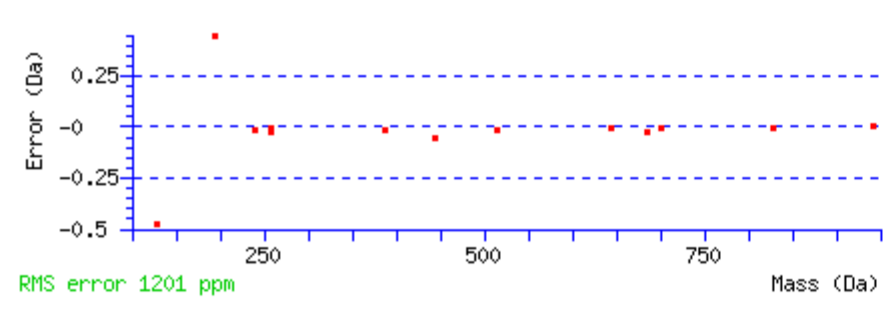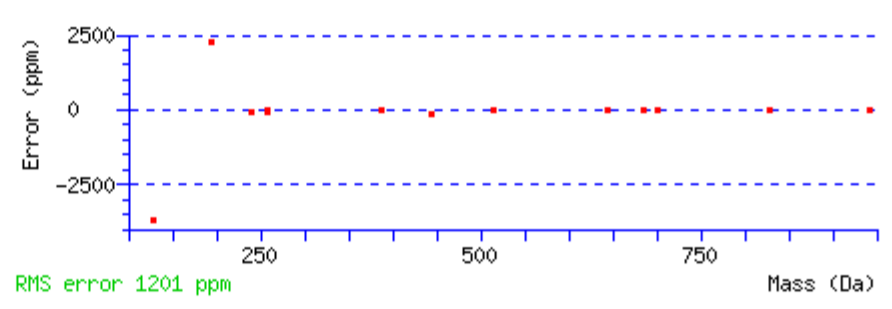

NCBI BLAST search of [GISEQEGKIK](#)

(Parameters: blastp, nr protein database, expect=20000, no filter, PAM30)

Other BLAST [web gateways](#)

### All matches to this query

| Score | $M_r(\text{calc})$ : | Delta     | Sequence                   |
|-------|----------------------|-----------|----------------------------|
| 30.5  | 1087.587311          | 0.000097  | <a href="#">GISEQEGKIK</a> |
| 29.6  | 1087.587311          | 0.000097  | <a href="#">KLVNTEQEK</a>  |
| 16.9  | 1087.587296          | 0.000112  | <a href="#">QEESLKNIK</a>  |
| 10.0  | 1087.591354          | -0.003946 | <a href="#">KPEPLDFVK</a>  |
| 10.0  | 1087.580780          | 0.006628  | <a href="#">QLEMLKNGR</a>  |
| 9.3   | 1087.587311          | 0.000097  | <a href="#">QLTDNLKEK</a>  |
| 7.5   | 1087.587311          | 0.000097  | <a href="#">KELDISDR</a>   |
| 6.5   | 1087.587311          | 0.000097  | <a href="#">QEETISIIR</a>  |
| 6.4   | 1087.580780          | 0.006628  | <a href="#">QLNIARDMK</a>  |
| 5.1   | 1087.577438          | 0.009970  | <a href="#">QISHPLHPK</a>  |

# **MASCOT** Mascot Search Results

## Peptide View

MS/MS Fragmentation of **VLSQQAASVVK**

Found in **PUR8\_HUMAN**, Adenylosuccinate lyase OS=Homo sapiens GN=ADSL PE=1 SV=2

Match to Query 18316: 1128.655248 from(565.334900,2+) rtinseconds(1438) index(11999)

Title: Locus:1.1.1.2034.33

Data file 2011-11-10 - TFD - EP 4-3.mgf

Click mouse within plot area to zoom in by factor of two about that point

Or, Plot from  to  Da

Label all possible matches  Label matches used for scoring

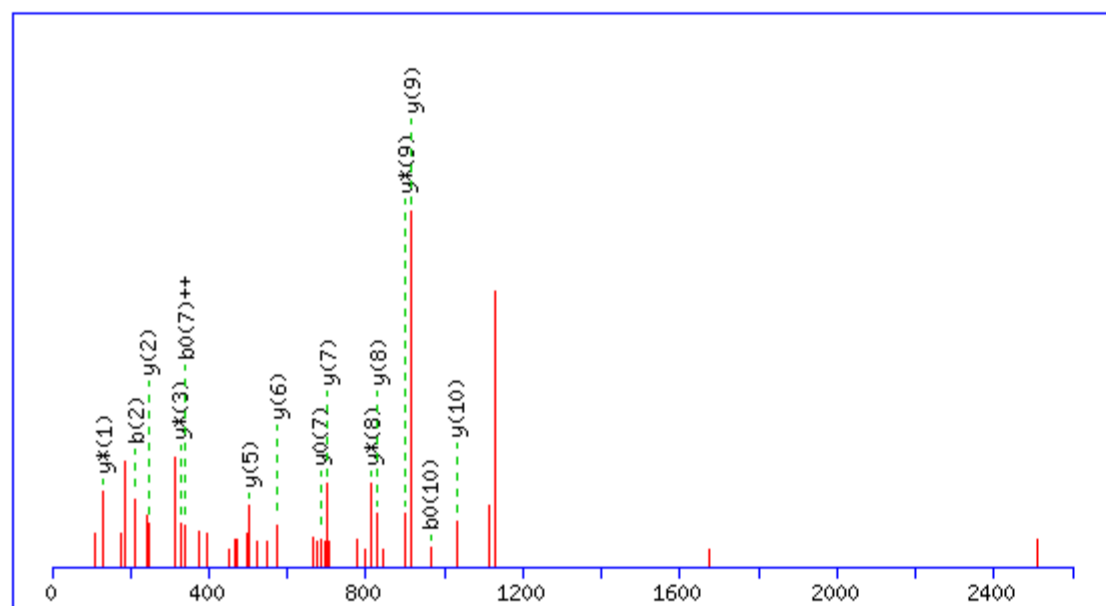

Monoisotopic mass of neutral peptide Mr(calc): 1128.650269

Fixed modifications: Propionamide (C) (apply to specified residues or termini only)

Ions Score: 35 Expect: 0.0017

Matches : 15/104 fragment ions using 32 most intense peaks [\(help\)](#)

| #  | b                 | b <sup>++</sup> | b <sup>*</sup> | b <sup>+++</sup> | b <sup>0</sup>    | b <sup>0++</sup>  | Seq. | y                  | y <sup>++</sup> | y <sup>*</sup>    | y <sup>+++</sup> | y <sup>0</sup>    | y <sup>0++</sup> | #  |
|----|-------------------|-----------------|----------------|------------------|-------------------|-------------------|------|--------------------|-----------------|-------------------|------------------|-------------------|------------------|----|
| 1  | 100.075690        | 50.541483       |                |                  |                   |                   | V    |                    |                 |                   |                  |                   |                  | 11 |
| 2  | <b>213.159754</b> | 107.083515      |                |                  |                   |                   | L    | <b>1030.589136</b> | 515.798206      | 1013.562587       | 507.284932       | 1012.578571       | 506.792924       | 10 |
| 3  | 300.191782        | 150.599529      |                |                  | 282.181217        | 141.594247        | S    | <b>917.505072</b>  | 459.256174      | <b>900.478523</b> | 450.742900       | 899.494507        | 450.250892       | 9  |
| 4  | 428.250360        | 214.628818      | 411.223811     | 206.115544       | 410.239795        | 205.623536        | Q    | <b>830.473044</b>  | 415.740160      | <b>813.446495</b> | 407.226886       | 812.462479        | 406.734878       | 8  |
| 5  | 556.308938        | 278.658107      | 539.282389     | 270.144833       | 538.298373        | 269.652825        | Q    | <b>702.414466</b>  | 351.710871      | 685.387917        | 343.197597       | <b>684.403901</b> | 342.705589       | 7  |
| 6  | 627.346052        | 314.176664      | 610.319503     | 305.663390       | 609.335487        | 305.171382        | A    | <b>574.355888</b>  | 287.681582      | 557.329339        | 279.168308       | 556.345323        | 278.676300       | 6  |
| 7  | 698.383166        | 349.695221      | 681.356617     | 341.181947       | 680.372601        | <b>340.689939</b> | A    | <b>503.318774</b>  | 252.163025      | 486.292225        | 243.649750       | 485.308209        | 243.157742       | 5  |
| 8  | 785.415194        | 393.211235      | 768.388645     | 384.697961       | 767.404629        | 384.205953        | S    | 432.281660         | 216.644468      | 415.255111        | 208.131193       | 414.271095        | 207.639186       | 4  |
| 9  | 884.483608        | 442.745442      | 867.457059     | 434.232168       | 866.473043        | 433.740160        | V    | 345.249632         | 173.128454      | <b>328.223083</b> | 164.615180       |                   |                  | 3  |
| 10 | 983.552022        | 492.279649      | 966.525473     | 483.766374       | <b>965.541457</b> | 483.274366        | V    | <b>246.181218</b>  | 123.594247      | 229.154669        | 115.080973       |                   |                  | 2  |
| 11 |                   |                 |                |                  |                   |                   | K    | 147.112804         | 74.060040       | <b>130.086255</b> | 65.546766        |                   |                  | 1  |

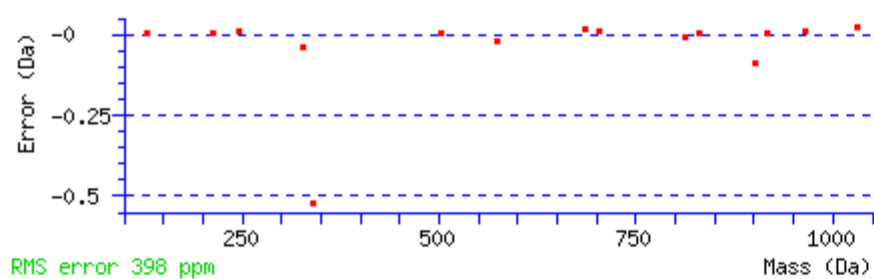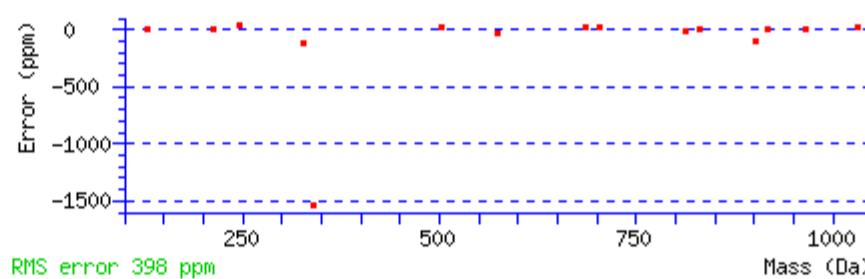

NCBI BLAST search of **VLSQQAASVVK**

(Parameters: blastp, nr protein database, expect=20000, no filter, PAM30)

Other BLAST [web gateways](#)

All matches to this query

| Score | Mr(calc):   | Delta     | Sequence                    |
|-------|-------------|-----------|-----------------------------|
| 35.4  | 1128.650269 | 0.004979  | <a href="#">VLSQQAASVVK</a> |
| 5.5   | 1128.665512 | -0.010264 | <a href="#">VPLALFALNR</a>  |
| 4.3   | 1128.657639 | -0.002391 | <a href="#">VIIMILNGEK</a>  |
| 2.3   | 1128.665527 | -0.010279 | <a href="#">VLEVTVRWK</a>   |

Mascot: <http://www.matrixscience.com/>

# MASCOT Search Results

## Peptide View

MS/MS Fragmentation of **YIEEQLLQR**

Found in **AR2BP\_HUMAN**, ADP-ribosylation factor-like protein 2-binding protein OS=Homo sapiens GN=ARL2BP PE=1 SV=1

Match to Query 29076: 1190.634868 from(596.324710,2+) rtinseconds(2360) index(26472)

Title: Locus:1.1.1.2166.38

Data file 2011-11-10 - TFD - EP 3-6.mgf

Click mouse within plot area to zoom in by factor of two about that point

Or, Plot from  to  Da

Label all possible matches  Label matches used for scoring

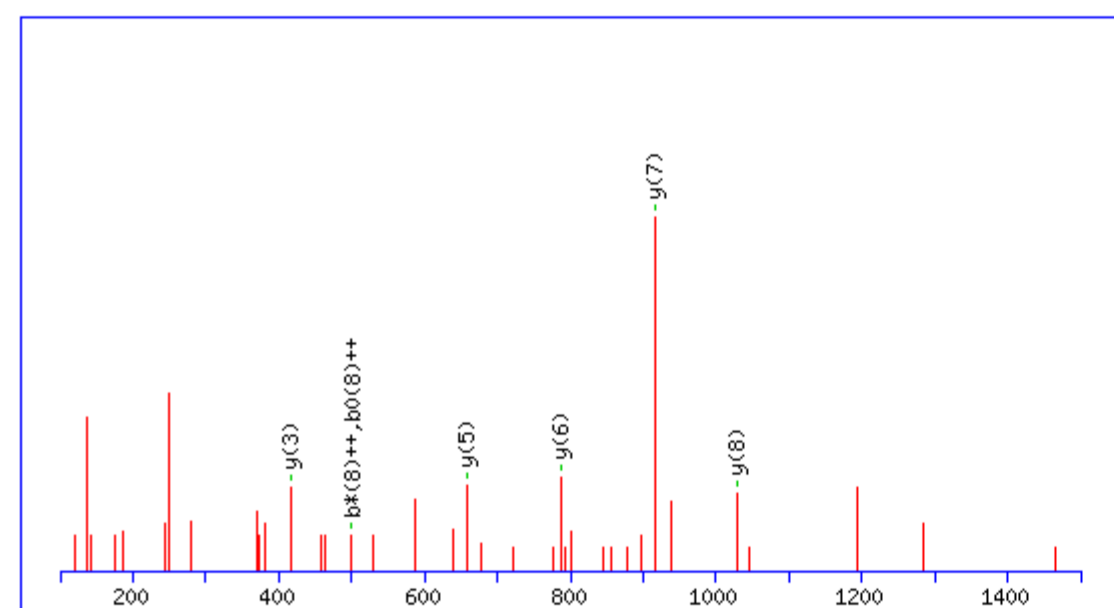

Monoisotopic mass of neutral peptide Mr(calc): 1190.629501

Fixed modifications: Propionamide (C) (apply to specified residues or termini only)

Ions Score: 32 Expect: 0.0059

Matches : 7/74 fragment ions using 10 most intense peaks ([help](#))

| # | b           | b <sup>++</sup> | b <sup>*</sup> | b <sup>+++</sup>  | b <sup>0</sup> | b <sup>0++</sup>  | Seq. | y                  | y <sup>++</sup> | y <sup>*</sup> | y <sup>+++</sup> | y <sup>0</sup> | y <sup>0++</sup> | # |
|---|-------------|-----------------|----------------|-------------------|----------------|-------------------|------|--------------------|-----------------|----------------|------------------|----------------|------------------|---|
| 1 | 164.070605  | 82.538940       |                |                   |                |                   | Y    |                    |                 |                |                  |                |                  | 9 |
| 2 | 277.154669  | 139.080973      |                |                   |                |                   | I    | <b>1028.573486</b> | 514.790381      | 1011.546937    | 506.277107       | 1010.562921    | 505.785099       | 8 |
| 3 | 406.197262  | 203.602269      |                |                   | 388.186697     | 194.596987        | E    | <b>915.489422</b>  | 458.248349      | 898.462873     | 449.735075       | 897.478857     | 449.243067       | 7 |
| 4 | 535.239855  | 268.123566      |                |                   | 517.229290     | 259.118283        | E    | <b>786.446829</b>  | 393.727053      | 769.420280     | 385.213778       | 768.436264     | 384.721770       | 6 |
| 5 | 663.298433  | 332.152855      | 646.271884     | 323.639580        | 645.287868     | 323.147572        | Q    | <b>657.404236</b>  | 329.205756      | 640.377687     | 320.692482       |                |                  | 5 |
| 6 | 776.382497  | 388.694887      | 759.355948     | 380.181612        | 758.371932     | 379.689604        | L    | 529.345658         | 265.176467      | 512.319109     | 256.663193       |                |                  | 4 |
| 7 | 889.466561  | 445.236919      | 872.440012     | 436.723644        | 871.455996     | 436.231636        | L    | <b>416.261594</b>  | 208.634435      | 399.235045     | 200.121160       |                |                  | 3 |
| 8 | 1017.525139 | 509.266208      | 1000.498590    | <b>500.752933</b> | 999.514574     | <b>500.260925</b> | Q    | 303.177530         | 152.092403      | 286.150981     | 143.579128       |                |                  | 2 |
| 9 |             |                 |                |                   |                |                   | R    | 175.118952         | 88.063114       | 158.092403     | 79.549839        |                |                  | 1 |

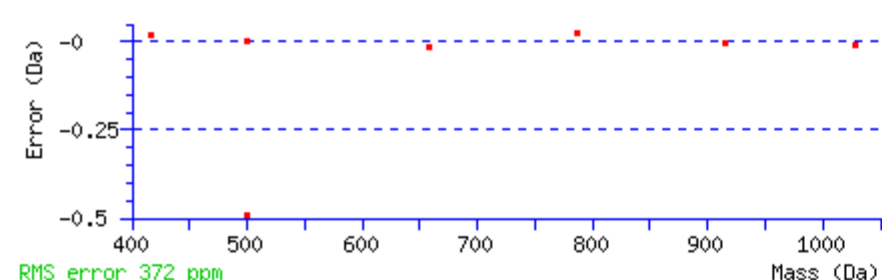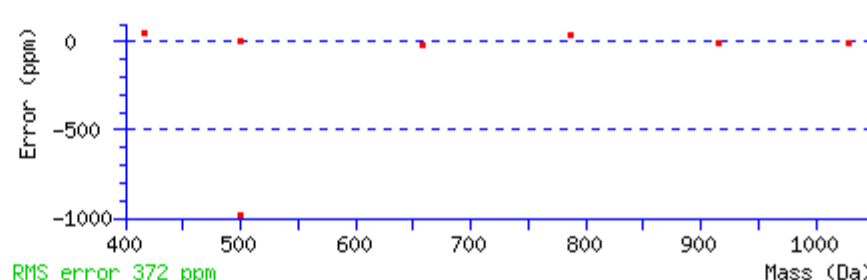

NCBI BLAST search of [YIEEQLLQR](#)

(Parameters: blastp, nr protein database, expect=20000, no filter, PAM30)

Other BLAST [web gateways](#)

## All matches to this query

| Score | Mr(calc):   | Delta     | Sequence                     |
|-------|-------------|-----------|------------------------------|
| 32.4  | 1190.629501 | 0.005367  | <a href="#">YIEEQLLQR</a>    |
| 9.9   | 1190.640762 | -0.005894 | <a href="#">APSPAGPLHKGK</a> |
| 8.3   | 1190.644806 | -0.009938 | <a href="#">DRPFFPGLVK</a>   |
| 8.3   | 1190.644135 | -0.009267 | <a href="#">VLMASVQGSKR</a>  |
| 6.2   | 1190.629517 | 0.005351  | <a href="#">SSPQAAVPYKK</a>  |
| 1.5   | 1190.640747 | -0.005879 | <a href="#">AARQAADFTLK</a>  |
| 1.3   | 1190.629532 | 0.005336  | <a href="#">YLPVTKEGPR</a>   |
| 0.6   | 1190.632889 | 0.001979  | <a href="#">VINSLSMGINK</a>  |
| 0.5   | 1190.629517 | 0.005351  | <a href="#">ALPKSYQQPK</a>   |

Mascot: <http://www.matrixscience.com/>



# {MATRIX} SCIENCE Mascot Search Results

## Peptide View

MS/MS Fragmentation of **WTTEQQQR**

Found in **AR6P1\_HUMAN**, ADP-ribosylation factor-like protein 6-interacting protein 1 OS=Homo sapiens GN=ARL6IP1 PE=1 SV=2

Match to Query 21770: 1075.505748 from(538.760150,2+) rtinseconds(991) index(1492)

Title: Locus:1.1.1.1645.25

Data file 2011-11-10 - TFD - EP 3-6.mgf

Click mouse within plot area to zoom in by factor of two about that point

Or, Plot from  to  Da

Label all possible matches  Label matches used for scoring

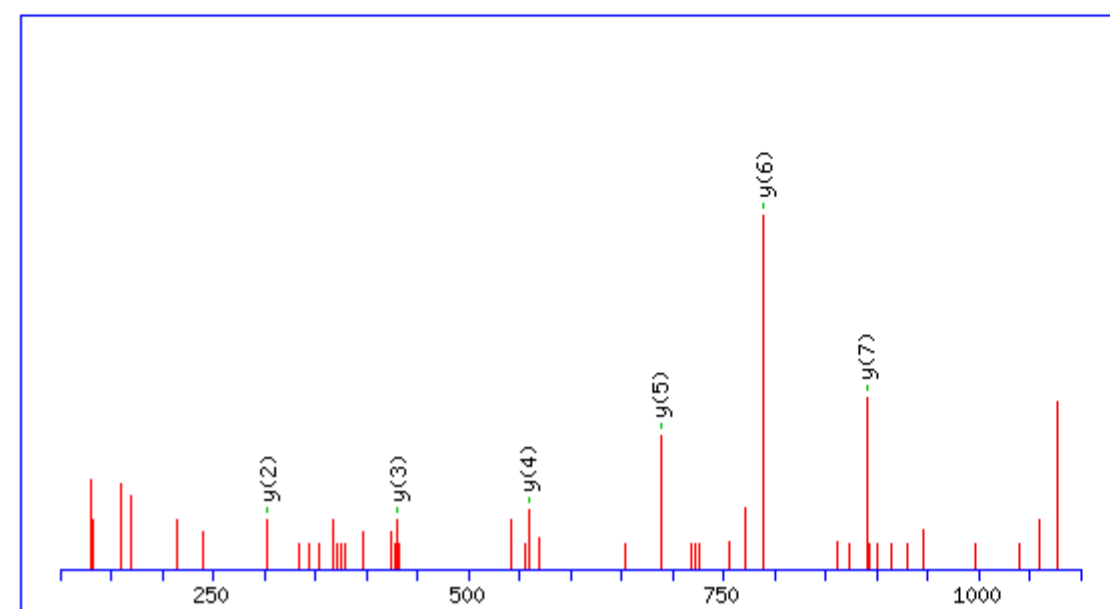

Monoisotopic mass of neutral peptide Mr(calc): 1075.504669

Fixed modifications: Propionamide (C) (apply to specified residues or termini only)

Ions Score: 49 Expect: 0.00015

Matches : 6/66 fragment ions using 10 most intense peaks [\(help\)](#)

| # | b          | b <sup>++</sup> | b*         | b <sup>+++</sup> | b <sup>0</sup> | b <sup>0++</sup> | Seq. | y                 | y <sup>++</sup> | y*         | y <sup>+++</sup> | y <sup>0</sup> | y <sup>0++</sup> | # |
|---|------------|-----------------|------------|------------------|----------------|------------------|------|-------------------|-----------------|------------|------------------|----------------|------------------|---|
| 1 | 187.086589 | 94.046932       |            |                  |                |                  | W    |                   |                 |            |                  |                |                  | 8 |
| 2 | 288.134268 | 144.570772      |            |                  | 270.123703     | 135.565490       | T    | <b>890.432637</b> | 445.719957      | 873.406088 | 437.206682       | 872.422072     | 436.714674       | 7 |
| 3 | 389.181947 | 195.094612      |            |                  | 371.171382     | 186.089329       | T    | <b>789.384958</b> | 395.196117      | 772.358409 | 386.682843       | 771.374393     | 386.190835       | 6 |
| 4 | 518.224540 | 259.615908      |            |                  | 500.213975     | 250.610626       | E    | <b>688.337279</b> | 344.672278      | 671.310730 | 336.159003       | 670.326714     | 335.666995       | 5 |
| 5 | 646.283118 | 323.645197      | 629.256569 | 315.131923       | 628.272553     | 314.639915       | Q    | <b>559.294686</b> | 280.150981      | 542.268137 | 271.637707       |                |                  | 4 |
| 6 | 774.341696 | 387.674486      | 757.315147 | 379.161212       | 756.331131     | 378.669204       | Q    | <b>431.236108</b> | 216.121692      | 414.209559 | 207.608418       |                |                  | 3 |
| 7 | 902.400274 | 451.703775      | 885.373725 | 443.190501       | 884.389709     | 442.698493       | Q    | <b>303.177530</b> | 152.092403      | 286.150981 | 143.579129       |                |                  | 2 |
| 8 |            |                 |            |                  |                |                  | R    | 175.118952        | 88.063114       | 158.092403 | 79.549840        |                |                  | 1 |

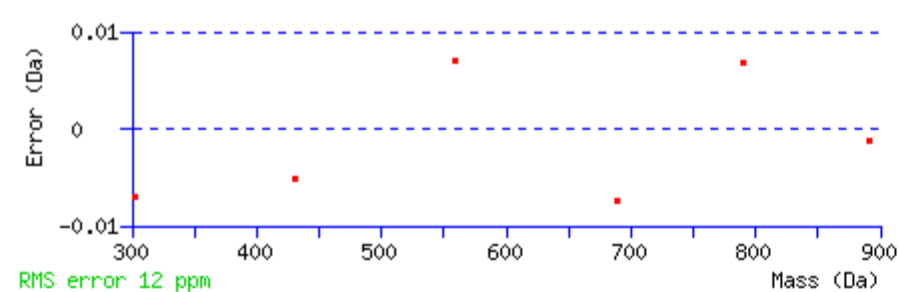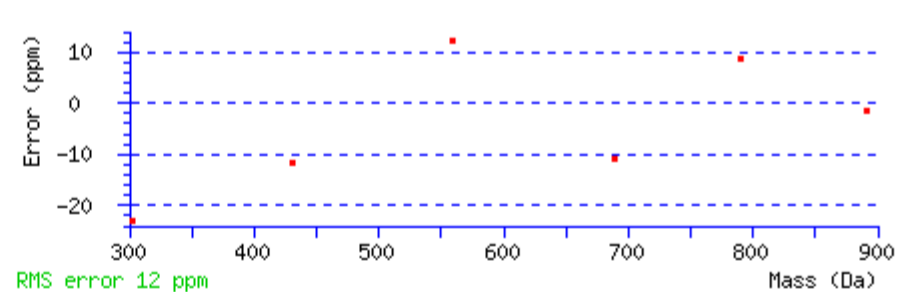

NCBI BLAST search of **WTTEQQQR**

(Parameters: blastp, nr protein database, expect=20000, no filter, PAM30)

Other BLAST [web gateways](#)

All matches to this query

| Score | Mr(calc):   | Delta     | Sequence                   |
|-------|-------------|-----------|----------------------------|
| 48.8  | 1075.504669 | 0.001079  | <a href="#">WTTEQQQR</a>   |
| 8.1   | 1075.507996 | -0.002248 | <a href="#">EQMEKANAR</a>  |
| 5.8   | 1075.514526 | -0.008778 | <a href="#">RDASEEELK</a>  |
| 5.0   | 1075.508026 | -0.002278 | <a href="#">MAAADSVQQR</a> |
| 5.0   | 1075.508026 | -0.002278 | <a href="#">MSPQEGQKR</a>  |
| 1.6   | 1075.508026 | -0.002278 | <a href="#">SAGKSCPPSR</a> |
| 0.3   | 1075.496811 | 0.008937  | <a href="#">EGQLTPMPR</a>  |

Mascot: <http://www.matrixscience.com/>

# MASCOT Search Results

## Peptide View

MS/MS Fragmentation of **AEFSAGAWSEPR**

Found in **AR6P6\_HUMAN**, ADP-ribosylation factor-like protein 6-interacting protein 6 OS=Homo sapiens GN=ARL6IP6 PE=1 SV=1

Match to Query 35229: 1306.600268 from(654.307410,2+) rtinseconds(2397) index(27182)

Title: Locus:1.1.1.2180.48

Data file 2011-11-10 - TFD - EP 3-6.mgf

Click mouse within plot area to zoom in by factor of two about that point

Or, Plot from  to  Da

Label all possible matches  Label matches used for scoring

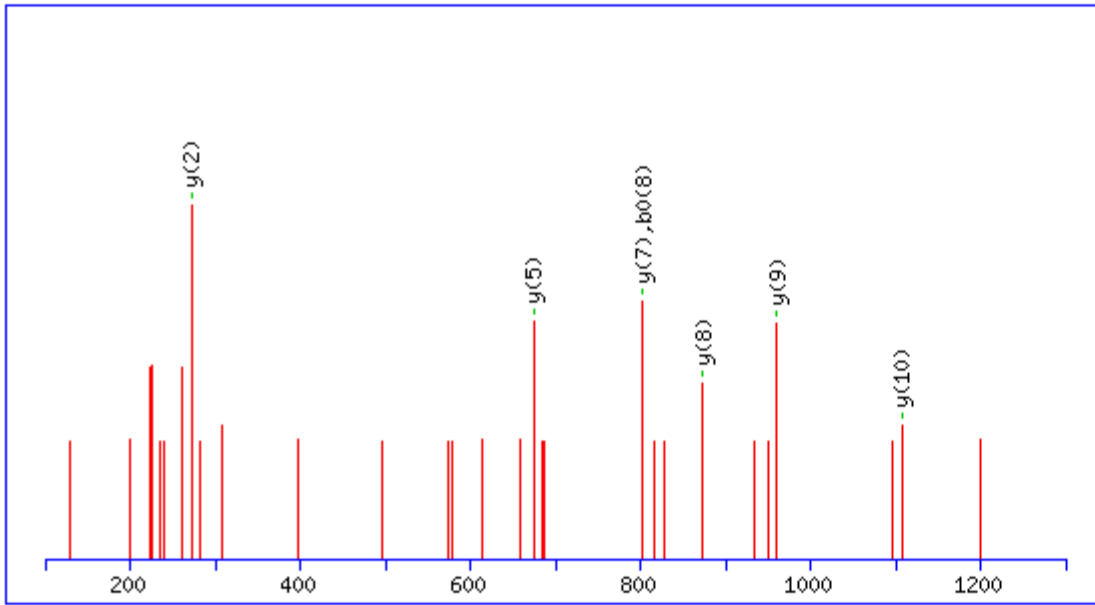

Monoisotopic mass of neutral peptide  $M_r(\text{calc})$ : 1306.594193

Fixed modifications: Propionamide (C) (apply to specified residues or termini only)

Ions Score: 38 Expect: 0.0037

Matches : 7/104 fragment ions using 11 most intense peaks ([help](#))

| #  | b           | b <sup>++</sup> | b <sup>0</sup>    | b <sup>0++</sup> | Seq. | y                  | y <sup>++</sup> | y <sup>*</sup> | y <sup>*++</sup> | y <sup>0</sup> | y <sup>0++</sup> | #  |
|----|-------------|-----------------|-------------------|------------------|------|--------------------|-----------------|----------------|------------------|----------------|------------------|----|
| 1  | 72.044390   | 36.525833       |                   |                  | A    |                    |                 |                |                  |                |                  | 12 |
| 2  | 201.086983  | 101.047130      | 183.076418        | 92.041847        | E    | 1236.564377        | 618.785827      | 1219.537828    | 610.272552       | 1218.553812    | 609.780544       | 11 |
| 3  | 348.155397  | 174.581336      | 330.144832        | 165.576054       | F    | <b>1107.521784</b> | 554.264530      | 1090.495235    | 545.751256       | 1089.511219    | 545.259248       | 10 |
| 4  | 435.187425  | 218.097351      | 417.176860        | 209.092068       | S    | <b>960.453370</b>  | 480.730323      | 943.426821     | 472.217049       | 942.442805     | 471.725041       | 9  |
| 5  | 506.224539  | 253.615907      | 488.213974        | 244.610625       | A    | <b>873.421342</b>  | 437.214309      | 856.394793     | 428.701035       | 855.410777     | 428.209027       | 8  |
| 6  | 563.246003  | 282.126640      | 545.235438        | 273.121357       | G    | <b>802.384228</b>  | 401.695752      | 785.357679     | 393.182478       | 784.373663     | 392.690470       | 7  |
| 7  | 634.283117  | 317.645197      | 616.272552        | 308.639914       | A    | 745.362764         | 373.185020      | 728.336215     | 364.671746       | 727.352199     | 364.179738       | 6  |
| 8  | 820.362430  | 410.684853      | <b>802.351865</b> | 401.679571       | W    | <b>674.325650</b>  | 337.666463      | 657.299101     | 329.153189       | 656.315085     | 328.661181       | 5  |
| 9  | 907.394458  | 454.200867      | 889.383893        | 445.195585       | S    | 488.246337         | 244.626806      | 471.219788     | 236.113532       | 470.235772     | 235.621524       | 4  |
| 10 | 1036.437051 | 518.722164      | 1018.426486       | 509.716881       | E    | 401.214309         | 201.110792      | 384.187760     | 192.597518       | 383.203744     | 192.105510       | 3  |
| 11 | 1133.489815 | 567.248546      | 1115.479250       | 558.243263       | P    | <b>272.171716</b>  | 136.589496      | 255.145167     | 128.076221       |                |                  | 2  |
| 12 |             |                 |                   |                  | R    | 175.118952         | 88.063114       | 158.092403     | 79.549839        |                |                  | 1  |

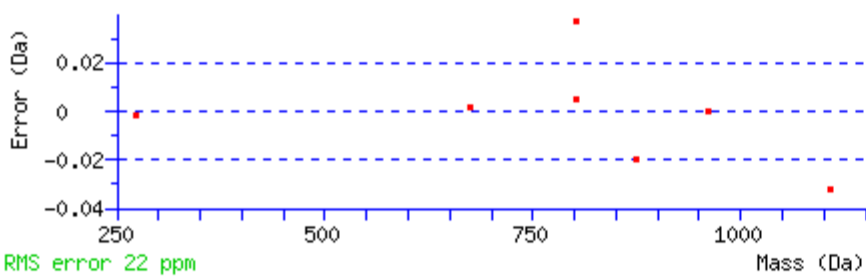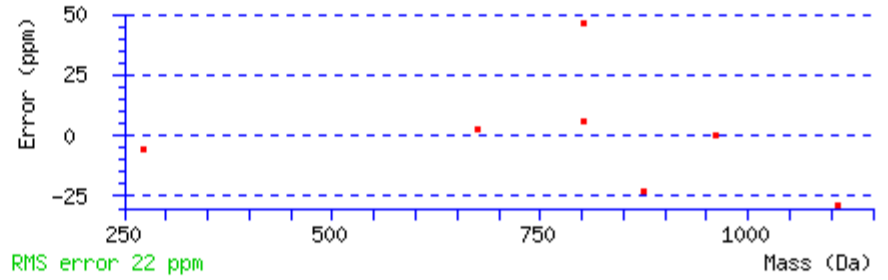

NCBI BLAST search of **AEFSAGAWSEPR**

(Parameters: blastp, nr protein database, expect=20000, no filter, PAM30)

Other BLAST [web gateways](#)

All matches to this query

| Score | $M_r(\text{calc})$ : | Delta    | Sequence                     |
|-------|----------------------|----------|------------------------------|
| 38.2  | 1306.594193          | 0.006075 | <a href="#">AEFSAGAWSEPR</a> |

Mascot: <http://www.matrixscience.com/>

# MASCOT SCIENCE Mascot Search Results

## Peptide View

MS/MS Fragmentation of **VPETVADAR**

Found in **ADX\_HUMAN**, Adrenodoxin, mitochondrial OS=Homo sapiens GN=FDX1 PE=1 SV=1

Match to Query 12511: 956.495168 from(479.254860,2+) rtinseconds(1179) index(3115)

Title: Locus:1.1.1.1855.8

Data file 2011-11-10 - TFD - EP 3-7.mgf

Click mouse within plot area to zoom in by factor of two about that point

Or, Plot from  to  Da

Label all possible matches  Label matches used for scoring

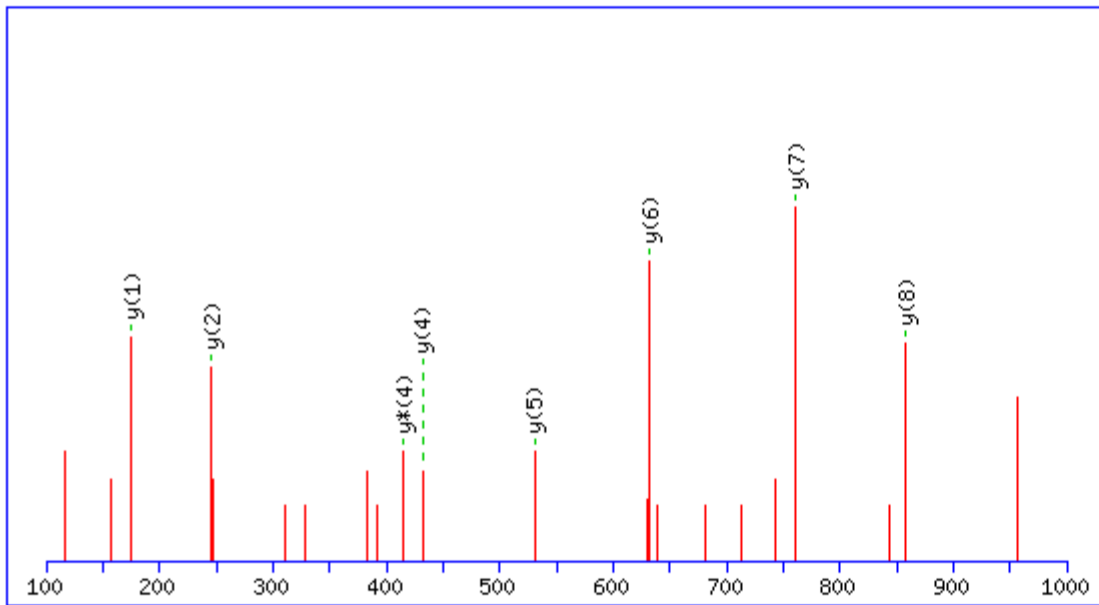

Monoisotopic mass of neutral peptide  $M_r(\text{calc})$ : 956.492706

Fixed modifications: Propionamide (C) (apply to specified residues or termini only)

Ions Score: 81 Expect: 2.8e-007

Matches : 8/72 fragment ions using 8 most intense peaks [\(help\)](#)

| # | b          | b <sup>++</sup> | b <sup>0</sup> | b <sup>0++</sup> | Seq. | y          | y <sup>++</sup> | y <sup>*</sup> | y <sup>+++</sup> | y <sup>0</sup> | y <sup>0++</sup> | # |
|---|------------|-----------------|----------------|------------------|------|------------|-----------------|----------------|------------------|----------------|------------------|---|
| 1 | 100.075690 | 50.541483       |                |                  | V    |            |                 |                |                  |                |                  | 9 |
| 2 | 197.128454 | 99.067865       |                |                  | P    | 858.431573 | 429.719425      | 841.405024     | 421.206150       | 840.421008     | 420.714142       | 8 |
| 3 | 326.171047 | 163.589161      | 308.160482     | 154.583879       | E    | 761.378809 | 381.193042      | 744.352260     | 372.679768       | 743.368244     | 372.187760       | 7 |
| 4 | 427.218726 | 214.113001      | 409.208161     | 205.107719       | T    | 632.336216 | 316.671746      | 615.309667     | 308.158471       | 614.325651     | 307.666463       | 6 |
| 5 | 526.287140 | 263.647208      | 508.276575     | 254.641926       | V    | 531.288537 | 266.147906      | 514.261988     | 257.634632       | 513.277972     | 257.142624       | 5 |
| 6 | 597.324254 | 299.165765      | 579.313689     | 290.160483       | A    | 432.220123 | 216.613699      | 415.193574     | 208.100425       | 414.209558     | 207.608417       | 4 |
| 7 | 712.351197 | 356.679237      | 694.340632     | 347.673954       | D    | 361.183009 | 181.095142      | 344.156460     | 172.581868       | 343.172444     | 172.089860       | 3 |
| 8 | 783.388311 | 392.197793      | 765.377746     | 383.192511       | A    | 246.156066 | 123.581671      | 229.129517     | 115.068396       |                |                  | 2 |
| 9 |            |                 |                |                  | R    | 175.118952 | 88.063114       | 158.092403     | 79.549839        |                |                  | 1 |

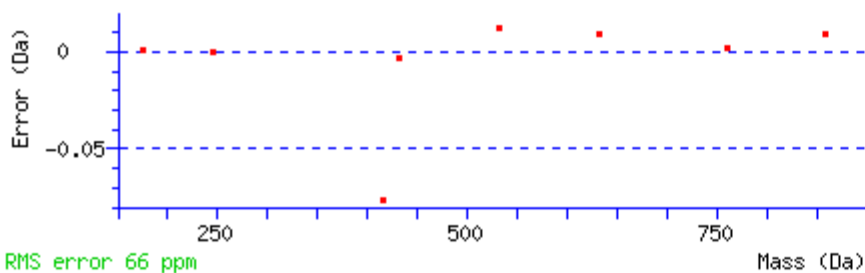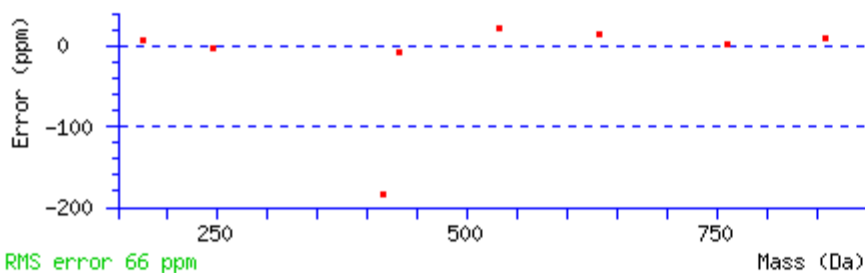

NCBI BLAST search of **VPETVADAR**

(Parameters: blastp, nr protein database, expect=20000, no filter, PAM30)

Other BLAST [web gateways](#)

All matches to this query

| Score | $M_r(\text{calc})$ : | Delta     | Sequence                   |
|-------|----------------------|-----------|----------------------------|
| 80.9  | 956.492706           | 0.002462  | <a href="#">VPETVADAR</a>  |
| 13.4  | 956.503922           | -0.008754 | <a href="#">LPDRTEAR</a>   |
| 12.7  | 956.486816           | 0.008352  | <a href="#">KSFYWAR</a>    |
| 11.9  | 956.492691           | 0.002477  | <a href="#">LPTPESAAAR</a> |
| 11.5  | 956.492722           | 0.002446  | <a href="#">VPPTTEGTR</a>  |
| 11.2  | 956.503937           | -0.008769 | <a href="#">VIPNQQR</a>    |
| 10.8  | 956.492722           | 0.002446  | <a href="#">LTLGGPDPR</a>  |
| 10.5  | 956.490189           | 0.004979  | <a href="#">VCFYKAR</a>    |
| 7.9   | 956.503922           | -0.008754 | <a href="#">ILNGQEQR</a>   |
| 7.5   | 956.486176           | 0.008992  | <a href="#">MVHTGEKR</a>   |

# MASCOT Search Results

## Peptide View

MS/MS Fragmentation of **RPMEFEAALLSPGSPK**  
Found in **AKIR1\_HUMAN**, Akirin-1 OS=Homo sapiens GN=AKIRIN1 PE=1 SV=1

Match to Query 5806: 1744.890176 from(437.229820,4+) rtinseconds(1437) index(11305)  
Title: Locus:1.1.1.1900.10  
Data file 2011-11-10 - TFD - EP 4-1.mgf

Click mouse within plot area to zoom in by factor of two about that point  
Or, Plot from  to  Da   
Label all possible matches  Label matches used for scoring

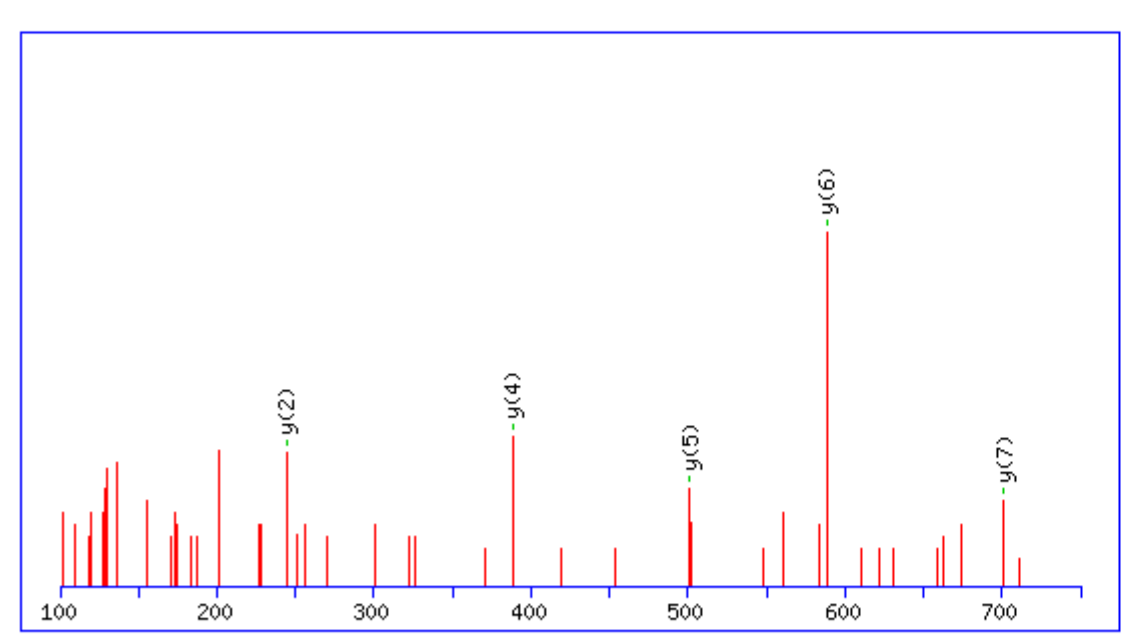

Monoisotopic mass of neutral peptide Mr(calc): 1744.881775  
Fixed modifications: Propionamide (C) (apply to specified residues or termini only)  
Variable modifications: P12 : Oxidation (P)  
Ions Score: 33 Expect: 0.0087  
Matches : 5/170 fragment ions using 7 most intense peaks ([help](#))

| #  | b           | b <sup>++</sup> | b <sup>*</sup> | b <sup>*++</sup> | b <sup>0</sup> | b <sup>0++</sup> | Seq. | y                 | y <sup>++</sup> | y <sup>*</sup> | y <sup>*++</sup> | y <sup>0</sup> | y <sup>0++</sup> | #  |
|----|-------------|-----------------|----------------|------------------|----------------|------------------|------|-------------------|-----------------|----------------|------------------|----------------|------------------|----|
| 1  | 157.108387  | 79.057831       | 140.081838     | 70.544557        |                |                  | R    |                   |                 |                |                  |                |                  | 16 |
| 2  | 254.161151  | 127.584213      | 237.134602     | 119.070939       |                |                  | P    | 1589.787972       | 795.397624      | 1572.761423    | 786.884350       | 1571.777407    | 786.392342       | 15 |
| 3  | 385.201636  | 193.104456      | 368.175087     | 184.591181       |                |                  | M    | 1492.735208       | 746.871242      | 1475.708659    | 738.357968       | 1474.724643    | 737.865960       | 14 |
| 4  | 514.244229  | 257.625753      | 497.217680     | 249.112478       | 496.233664     | 248.620470       | E    | 1361.694723       | 681.351000      | 1344.668174    | 672.837725       | 1343.684158    | 672.345717       | 13 |
| 5  | 661.312643  | 331.159960      | 644.286094     | 322.646685       | 643.302078     | 322.154677       | F    | 1232.652130       | 616.829703      | 1215.625581    | 608.316429       | 1214.641565    | 607.824421       | 12 |
| 6  | 790.355236  | 395.681256      | 773.328687     | 387.167982       | 772.344671     | 386.675974       | E    | 1085.583716       | 543.295496      | 1068.557167    | 534.782222       | 1067.573151    | 534.290214       | 11 |
| 7  | 861.392350  | 431.199813      | 844.365801     | 422.686538       | 843.381785     | 422.194530       | A    | 956.541123        | 478.774200      | 939.514574     | 470.260925       | 938.530558     | 469.768917       | 10 |
| 8  | 932.429464  | 466.718370      | 915.402915     | 458.205095       | 914.418899     | 457.713087       | A    | 885.504009        | 443.255643      | 868.477460     | 434.742368       | 867.493444     | 434.250360       | 9  |
| 9  | 1045.513528 | 523.260402      | 1028.486979    | 514.747128       | 1027.502963    | 514.255119       | L    | 814.466895        | 407.737086      | 797.440346     | 399.223811       | 796.456330     | 398.731803       | 8  |
| 10 | 1158.597592 | 579.802434      | 1141.571043    | 571.289159       | 1140.587027    | 570.797151       | L    | <b>701.382831</b> | 351.195054      | 684.356282     | 342.681779       | 683.372266     | 342.189771       | 7  |
| 11 | 1245.629620 | 623.318448      | 1228.603071    | 614.805174       | 1227.619055    | 614.313165       | S    | <b>588.298767</b> | 294.653022      | 571.272218     | 286.139747       | 570.288202     | 285.647739       | 6  |
| 12 | 1358.677299 | 679.842288      | 1341.650750    | 671.329013       | 1340.666734    | 670.837005       | P    | <b>501.266739</b> | 251.137008      | 484.240190     | 242.623733       | 483.256174     | 242.131725       | 5  |
| 13 | 1415.698763 | 708.353019      | 1398.672214    | 699.839745       | 1397.688198    | 699.347737       | G    | <b>388.219060</b> | 194.613168      | 371.192511     | 186.099894       | 370.208495     | 185.607886       | 4  |
| 14 | 1502.730791 | 751.869034      | 1485.704242    | 743.355759       | 1484.720226    | 742.863751       | S    | 331.197596        | 166.102436      | 314.171047     | 157.589162       | 313.187031     | 157.097154       | 3  |
| 15 | 1599.783555 | 800.395416      | 1582.757006    | 791.882141       | 1581.772990    | 791.390133       | P    | <b>244.165568</b> | 122.586422      | 227.139019     | 114.073148       |                |                  | 2  |
| 16 |             |                 |                |                  |                |                  | K    | 147.112804        | 74.060040       | 130.086255     | 65.546765        |                |                  | 1  |

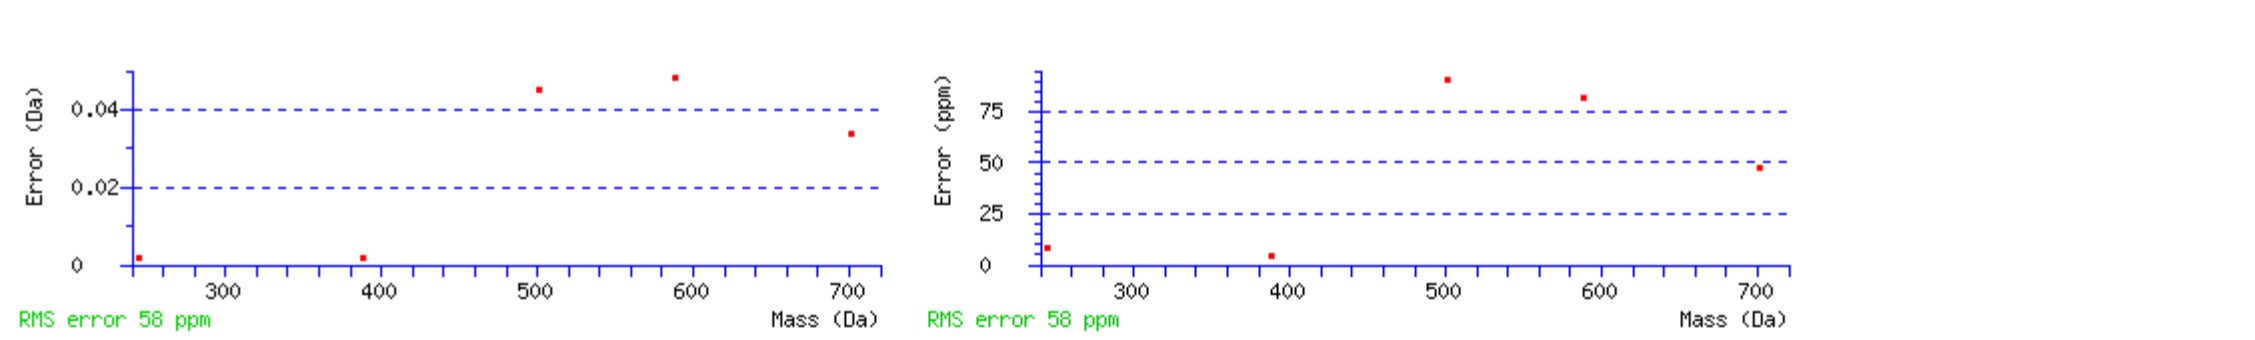

NCBI BLAST search of **RPMEFEAALLSPGSPK**  
(Parameters: blastp, nr protein database, expect=20000, no filter, PAM30)  
Other BLAST [web gateways](#)

### All matches to this query

| Score | Mr(calc):   | Delta     | Sequence                          |
|-------|-------------|-----------|-----------------------------------|
| 32.8  | 1744.881775 | 0.008401  | <a href="#">RPMEFEAALLSPGSPK</a>  |
| 10.2  | 1744.881775 | 0.008401  | <a href="#">RPMEFEAALLSPGSPK</a>  |
| 10.2  | 1744.881775 | 0.008401  | <a href="#">RPMEFEAALLSPGSPK</a>  |
| 8.6   | 1744.881775 | 0.008401  | <a href="#">RPMEFEAALLSPGSPK</a>  |
| 7.5   | 1744.889664 | 0.000512  | <a href="#">DQHFLQHPQLLPK</a>     |
| 7.3   | 1744.888336 | 0.001840  | <a href="#">VPEPGYTKVPEPGSIK</a>  |
| 7.0   | 1744.893707 | -0.003531 | <a href="#">GVSRSLLWDVFAFSFK</a>  |
| 5.6   | 1744.889648 | 0.000528  | <a href="#">EEDVRPIFWASRPK</a>    |
| 5.3   | 1744.899567 | -0.009391 | <a href="#">GESPPTPPGQPPISPCK</a> |
| 4.9   | 1744.903580 | -0.013404 | <a href="#">DKGPEPTFKPYLPPK</a>   |

# MASCOT SCIENCE Mascot Search Results

## Peptide View

MS/MS Fragmentation of **IGFTGSTEVGK**

Found in **AL1L1\_HUMAN**, Aldehyde dehydrogenase family 1 member L1 OS=Homo sapiens GN=ALDH1L1 PE=1 SV=2

Match to Query 15514: 1094.561068 from(548.287810,2+) rtinseconds(1495) index(12514)

Title: Locus:1.1.1.2083.27

Data file 2011-11-12 - TFD - EP 5-3.mgf

Click mouse within plot area to zoom in by factor of two about that point

Or, Plot from  to  Da

Label all possible matches  Label matches used for scoring

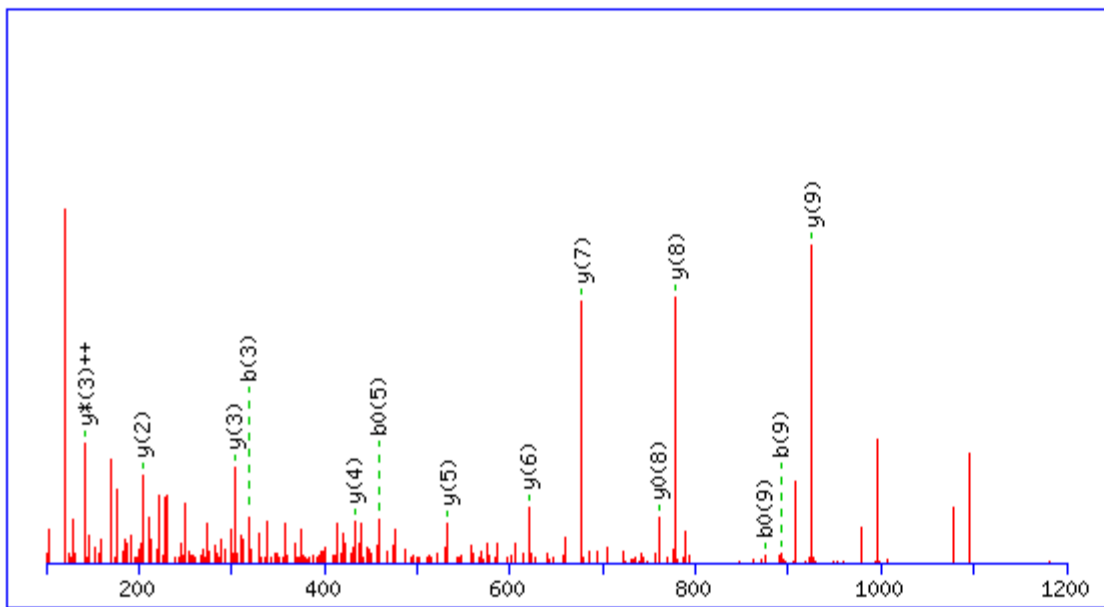

Monoisotopic mass of neutral peptide Mr(calc): 1094.560806

Fixed modifications: Propionamide (C) (apply to specified residues or termini only)

Ions Score: 69 Expect: 1.2e-006

Matches : 14/88 fragment ions using 20 most intense peaks [\(help\)](#)

| #  | b                 | b <sup>++</sup> | b <sup>0</sup>    | b <sup>0++</sup> | Seq. | y                 | y <sup>++</sup> | y <sup>*</sup> | y <sup>*++</sup>  | y <sup>0</sup>    | y <sup>0++</sup> | #  |
|----|-------------------|-----------------|-------------------|------------------|------|-------------------|-----------------|----------------|-------------------|-------------------|------------------|----|
| 1  | 114.091340        | 57.549308       |                   |                  | I    |                   |                 |                |                   |                   |                  | 11 |
| 2  | 171.112804        | 86.060040       |                   |                  | G    | 982.484003        | 491.745640      | 965.457454     | 483.232365        | 964.473438        | 482.740357       | 10 |
| 3  | <b>318.181218</b> | 159.594247      |                   |                  | F    | <b>925.462539</b> | 463.234908      | 908.435990     | 454.721633        | 907.451974        | 454.229625       | 9  |
| 4  | 419.228897        | 210.118087      | 401.218332        | 201.112804       | T    | <b>778.394125</b> | 389.700701      | 761.367576     | 381.187426        | <b>760.383560</b> | 380.695418       | 8  |
| 5  | 476.250361        | 238.628818      | <b>458.239796</b> | 229.623536       | G    | <b>677.346446</b> | 339.176861      | 660.319897     | 330.663587        | 659.335881        | 330.171579       | 7  |
| 6  | 563.282389        | 282.144833      | 545.271824        | 273.139550       | S    | <b>620.324982</b> | 310.666129      | 603.298433     | 302.152855        | 602.314417        | 301.660847       | 6  |
| 7  | 664.330068        | 332.668672      | 646.319503        | 323.663390       | T    | <b>533.292954</b> | 267.150115      | 516.266405     | 258.636841        | 515.282389        | 258.144833       | 5  |
| 8  | 793.372661        | 397.189969      | 775.362096        | 388.184686       | E    | <b>432.245275</b> | 216.626275      | 415.218726     | 208.113001        | 414.234710        | 207.620993       | 4  |
| 9  | <b>892.441075</b> | 446.724176      | <b>874.430510</b> | 437.718893       | V    | <b>303.202682</b> | 152.104979      | 286.176133     | <b>143.591704</b> |                   |                  | 3  |
| 10 | 949.462539        | 475.234908      | 931.451974        | 466.229625       | G    | <b>204.134268</b> | 102.570772      | 187.107719     | 94.057498         |                   |                  | 2  |
| 11 |                   |                 |                   |                  | K    | 147.112804        | 74.060040       | 130.086255     | 65.546765         |                   |                  | 1  |

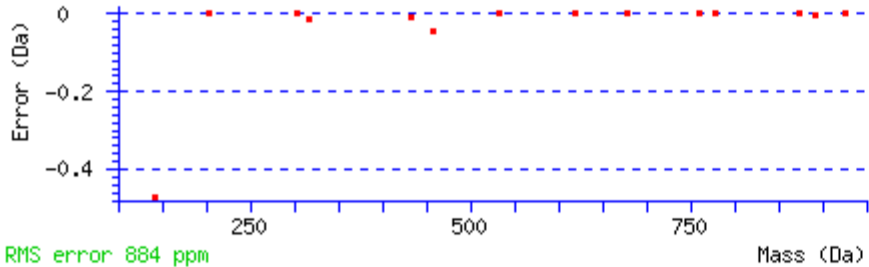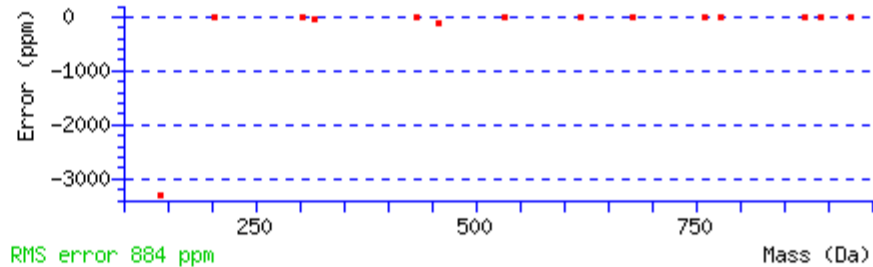

NCBI BLAST search of **IGFTGSTEVGK**

(Parameters: blastp, nr protein database, expect=20000, no filter, PAM30)

Other BLAST [web gateways](#)

## All matches to this query

| Score | Mr(calc):   | Delta    | Sequence                    |
|-------|-------------|----------|-----------------------------|
| 86.0  | 1094.560806 | 0.000262 | <a href="#">VAFTGSTEVGK</a> |
| 68.8  | 1094.560806 | 0.000262 | <a href="#">IGFTGSTEVGK</a> |
| 8.0   | 1094.560791 | 0.000277 | <a href="#">VPQSPAPTEGI</a> |

Mascot: <http://www.matrixscience.com/>

# Mascot Search Results

## Peptide View

MS/MS Fragmentation of **FLPLPVVQLLDR**

Found in **RETST\_HUMAN**, All-trans-retinol 13,14-reductase OS=Homo sapiens GN=RETSAT PE=2 SV=2

Match to Query 39577: 1408.853008 from(705.433780,2+) rtinseconds(4381) index(67596)

Title: Locus:1.1.1.3038.18

Data file 2011-11-12 - TFD - EP 6-3.mgf

Click mouse within plot area to zoom in by factor of two about that point

Or, Plot from  to  Da

Label all possible matches  Label matches used for scoring

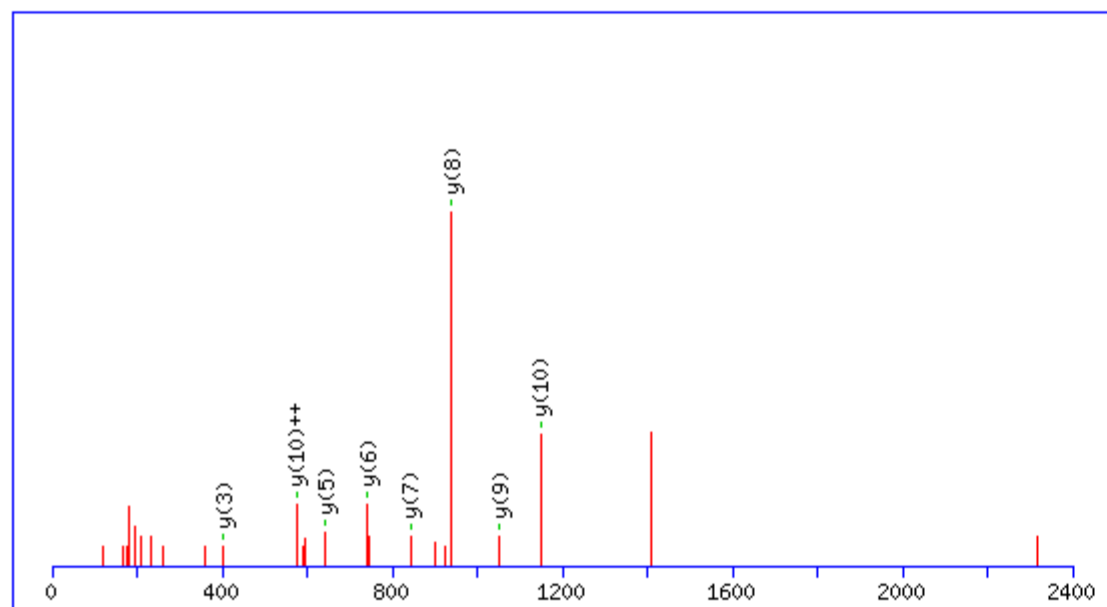

Monoisotopic mass of neutral peptide Mr(calc): 1408.844223

Fixed modifications: Propionamide (C) (apply to specified residues or termini only)

Ions Score: 58 Expect: 2.9e-006

Matches : 8/96 fragment ions using 10 most intense peaks ([help](#))

| #  | b           | b <sup>++</sup> | b <sup>*</sup> | b <sup>+++</sup> | b <sup>0</sup> | b <sup>0++</sup> | Seq. | y                  | y <sup>++</sup>   | y <sup>*</sup> | y <sup>+++</sup> | y <sup>0</sup> | y <sup>0++</sup> | #  |
|----|-------------|-----------------|----------------|------------------|----------------|------------------|------|--------------------|-------------------|----------------|------------------|----------------|------------------|----|
| 1  | 148.075690  | 74.541483       |                |                  |                |                  | F    |                    |                   |                |                  |                |                  | 12 |
| 2  | 261.159754  | 131.083515      |                |                  |                |                  | L    | 1262.783085        | 631.895181        | 1245.756536    | 623.381906       | 1244.772520    | 622.889898       | 11 |
| 3  | 358.212518  | 179.609897      |                |                  |                |                  | P    | <b>1149.699021</b> | <b>575.353149</b> | 1132.672472    | 566.839874       | 1131.688456    | 566.347866       | 10 |
| 4  | 471.296582  | 236.151929      |                |                  |                |                  | L    | <b>1052.646257</b> | 526.826767        | 1035.619708    | 518.313492       | 1034.635692    | 517.821484       | 9  |
| 5  | 568.349346  | 284.678311      |                |                  |                |                  | P    | <b>939.562193</b>  | 470.284735        | 922.535644     | 461.771460       | 921.551628     | 461.279452       | 8  |
| 6  | 667.417760  | 334.212518      |                |                  |                |                  | V    | <b>842.509429</b>  | 421.758353        | 825.482880     | 413.245078       | 824.498864     | 412.753070       | 7  |
| 7  | 766.486174  | 383.746725      |                |                  |                |                  | V    | <b>743.441015</b>  | 372.224146        | 726.414466     | 363.710871       | 725.430450     | 363.218863       | 6  |
| 8  | 894.544752  | 447.776014      | 877.518203     | 439.262740       |                |                  | Q    | <b>644.372601</b>  | 322.689939        | 627.346052     | 314.176664       | 626.362036     | 313.684656       | 5  |
| 9  | 1007.628816 | 504.318046      | 990.602267     | 495.804772       |                |                  | L    | 516.314023         | 258.660650        | 499.287474     | 250.147375       | 498.303458     | 249.655367       | 4  |
| 10 | 1120.712880 | 560.860078      | 1103.686331    | 552.346804       |                |                  | L    | <b>403.229959</b>  | 202.118618        | 386.203410     | 193.605343       | 385.219394     | 193.113335       | 3  |
| 11 | 1235.739823 | 618.373550      | 1218.713274    | 609.860275       | 1217.729258    | 609.368267       | D    | 290.145895         | 145.576585        | 273.119346     | 137.063311       | 272.135330     | 136.571303       | 2  |
| 12 |             |                 |                |                  |                |                  | R    | 175.118952         | 88.063114         | 158.092403     | 79.549839        |                |                  | 1  |

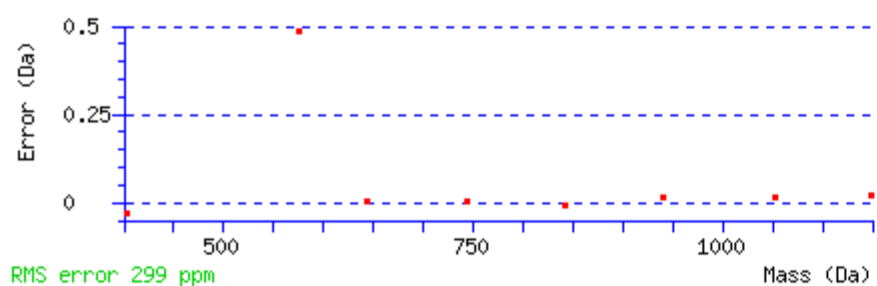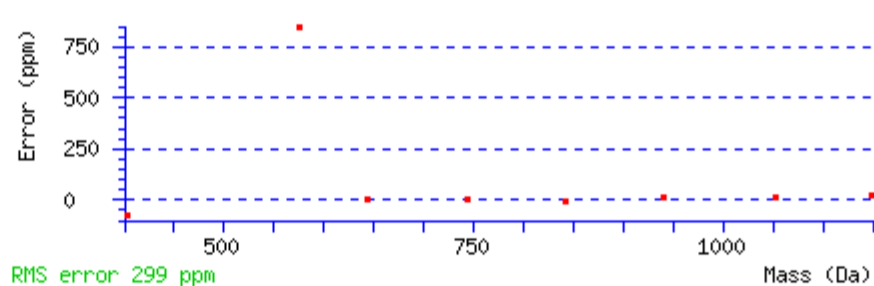

NCBI BLAST search of **FLPLPVVQLLDR**

(Parameters: blastp, nr protein database, expect=20000, no filter, PAM30)

Other BLAST [web gateways](#)

All matches to this query

| Score | Mr(calc):   | Delta    | Sequence                     |
|-------|-------------|----------|------------------------------|
| 57.6  | 1408.844223 | 0.008785 | <a href="#">FLPLPVVQLLDR</a> |

Mascot: <http://www.matrixscience.com/>

**MASCOT** **SCIENCE** Mascot Search Results

Peptide View

MS/MS Fragmentation of **TVLDSGISEVR**

Found in **CRYAA\_HUMAN**, Alpha-crystallin A chain OS=Homo sapiens GN=CRYAA PE=1 SV=2

Match to Query 33370: 1174.614048 from(588.314300,2+) rtinseconds(2175) index(24181)

Title: Locus:1.1.1.2085.34

Data file 2011-11-10 - TFD - EP 4-6.mgf

Click mouse within plot area to zoom in by factor of two about that point

Or, Plot from  to  Da

Label all possible matches  Label matches used for scoring

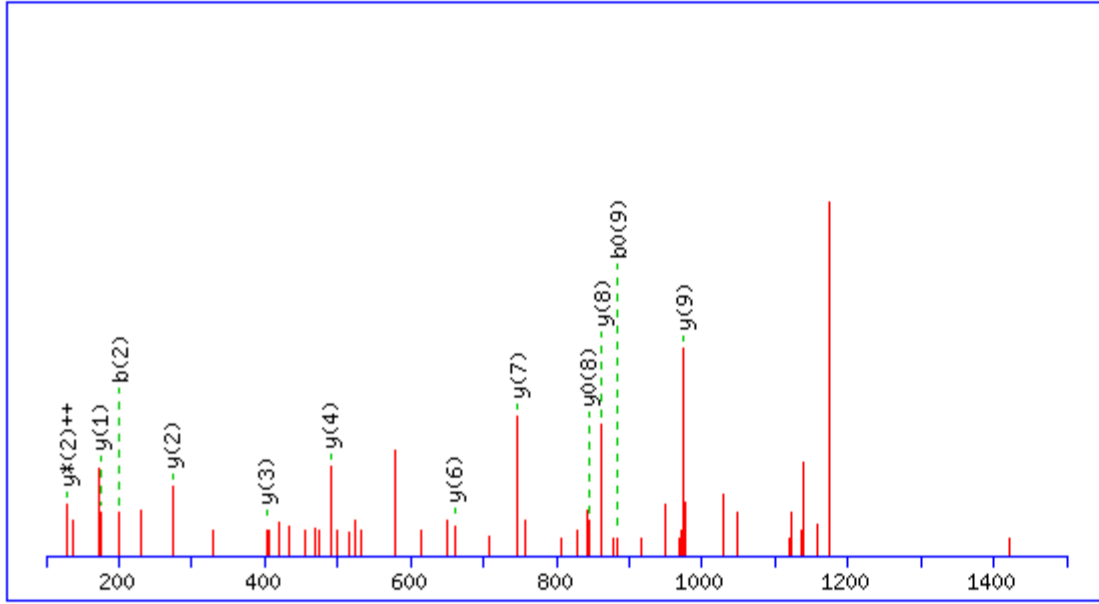

Monoisotopic mass of neutral peptide Mr(calc): 1174.619370

Fixed modifications: Propionamide (C) (apply to specified residues or termini only)

Ions Score: 33 Expect: 0.0057

Matches : 12/96 fragment ions using 42 most intense peaks [\(help\)](#)

| #  | b                 | b <sup>++</sup> | b <sup>0</sup>    | b <sup>0++</sup> | Seq. | y                 | y <sup>++</sup> | y <sup>*</sup> | y <sup>+++</sup>  | y <sup>0</sup>    | y <sup>0++</sup> | #  |
|----|-------------------|-----------------|-------------------|------------------|------|-------------------|-----------------|----------------|-------------------|-------------------|------------------|----|
| 1  | 102.054955        | 51.531116       | 84.044390         | 42.525833        | T    |                   |                 |                |                   |                   |                  | 11 |
| 2  | <b>201.123369</b> | 101.065322      | 183.112804        | 92.060040        | V    | 1074.578964       | 537.793120      | 1057.552415    | 529.279846        | 1056.568399       | 528.787838       | 10 |
| 3  | 314.207433        | 157.607354      | 296.196868        | 148.602072       | L    | <b>975.510550</b> | 488.258913      | 958.484001     | 479.745639        | 957.499985        | 479.253631       | 9  |
| 4  | 429.234376        | 215.120826      | 411.223811        | 206.115544       | D    | <b>862.426486</b> | 431.716881      | 845.399937     | 423.203607        | <b>844.415921</b> | 422.711599       | 8  |
| 5  | 516.266404        | 258.636840      | 498.255839        | 249.631558       | S    | <b>747.399543</b> | 374.203410      | 730.372994     | 365.690135        | 729.388978        | 365.198127       | 7  |
| 6  | 573.287868        | 287.147572      | 555.277303        | 278.142290       | G    | <b>660.367515</b> | 330.687396      | 643.340966     | 322.174121        | 642.356950        | 321.682113       | 6  |
| 7  | 686.371932        | 343.689604      | 668.361367        | 334.684322       | I    | 603.346051        | 302.176664      | 586.319502     | 293.663389        | 585.335486        | 293.171381       | 5  |
| 8  | 773.403960        | 387.205618      | 755.393395        | 378.200336       | S    | <b>490.261987</b> | 245.634631      | 473.235438     | 237.121357        | 472.251422        | 236.629349       | 4  |
| 9  | 902.446553        | 451.726915      | <b>884.435988</b> | 442.721632       | E    | <b>403.229959</b> | 202.118617      | 386.203410     | 193.605343        | 385.219394        | 193.113335       | 3  |
| 10 | 1001.514967       | 501.261122      | 983.504402        | 492.255839       | V    | <b>274.187366</b> | 137.597321      | 257.160817     | <b>129.084046</b> |                   |                  | 2  |
| 11 |                   |                 |                   |                  | R    | <b>175.118952</b> | 88.063114       | 158.092403     | 79.549839         |                   |                  | 1  |

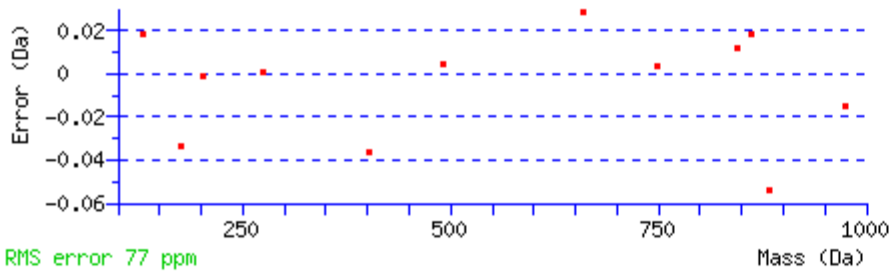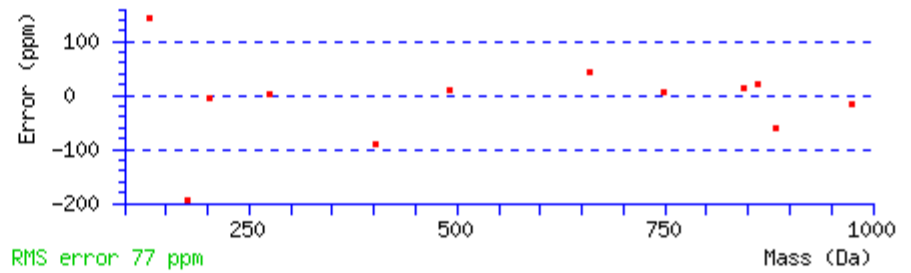

NCBI BLAST search of **TVLDSGISEVR**

(Parameters: blastp, nr protein database, expect=20000, no filter, PAM30)

Other BLAST [web gateways](#)

All matches to this query

| Score | Mr(calc):   | Delta     | Sequence                     |
|-------|-------------|-----------|------------------------------|
| 33.1  | 1174.619370 | -0.005322 | <a href="#">TVLDSGISEVR</a>  |
| 8.6   | 1174.608093 | 0.005955  | <a href="#">SLLDASEEAIK</a>  |
| 7.0   | 1174.619354 | -0.005306 | <a href="#">LLSDLVDSAR</a>   |
| 6.3   | 1174.619354 | -0.005306 | <a href="#">TATGLGSKEAPK</a> |
| 4.8   | 1174.609436 | 0.004612  | <a href="#">QPDNAKALYR</a>   |
| 2.0   | 1174.612839 | 0.001209  | <a href="#">KPPMATTKGGR</a>  |
| 2.0   | 1174.609467 | 0.004581  | <a href="#">QPAPPTSQPPR</a>  |
| 0.5   | 1174.608124 | 0.005924  | <a href="#">EADLDVATITK</a>  |
| 0.0   | 1174.619339 | -0.005291 | <a href="#">SLIEKNQTDK</a>   |

# MASCOT SCIENCE Mascot Search Results

## Peptide View

MS/MS Fragmentation of **FVGGSGQVSER**

Found in **AOFA\_HUMAN**, Amine oxidase [flavin-containing] A OS=Homo sapiens GN=MAOA PE=1 SV=1

Match to Query 422366: 1121.544948 from(561.779750,2+) rtinseconds(1146) index(331421)

Title: Locus:1.1.1.770.30

Data file C:\Program Files (x86)\Matrix Science\Mascot Daemon\mgf\3 TFD - Epitel - R2\mascot\_daemon\_merge.mgf

Click mouse within plot area to zoom in by factor of two about that point

Or, Plot from  to  Da

Label all possible matches  Label matches used for scoring

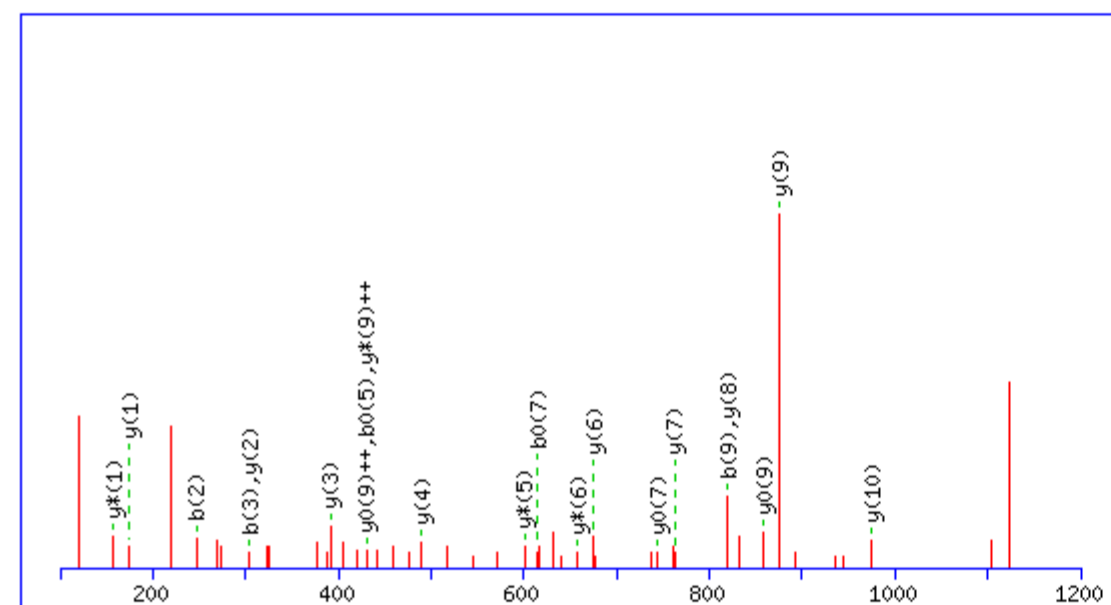

Monoisotopic mass of neutral peptide Mr(calc): 1121.546555

Fixed modifications: Carbamidomethyl (C) (apply to specified residues or termini only)

Ions Score: 56 Expect: 2.2e-005

Matches : 21/98 fragment ions using 41 most intense peaks [\(help\)](#)

| #  | b                 | b <sup>++</sup> | b <sup>*</sup> | b <sup>*++</sup> | b <sup>0</sup>    | b <sup>0++</sup>  | Seq. | y                 | y <sup>++</sup> | y <sup>*</sup>    | y <sup>*++</sup>  | y <sup>0</sup>    | y <sup>0++</sup>  | #  |
|----|-------------------|-----------------|----------------|------------------|-------------------|-------------------|------|-------------------|-----------------|-------------------|-------------------|-------------------|-------------------|----|
| 1  | 148.075690        | 74.541483       |                |                  |                   |                   | F    |                   |                 |                   |                   |                   |                   | 11 |
| 2  | <b>247.144104</b> | 124.075690      |                |                  |                   |                   | V    | <b>975.485399</b> | 488.246338      | 958.458850        | 479.733063        | 957.474834        | 479.241055        | 10 |
| 3  | <b>304.165568</b> | 152.586422      |                |                  |                   |                   | G    | <b>876.416985</b> | 438.712131      | 859.390436        | <b>430.198856</b> | <b>858.406420</b> | <b>429.706848</b> | 9  |
| 4  | 361.187032        | 181.097154      |                |                  |                   |                   | G    | <b>819.395521</b> | 410.201399      | 802.368972        | 401.688124        | 801.384956        | 401.196116        | 8  |
| 5  | 448.219060        | 224.613168      |                |                  |                   | <b>430.208495</b> | S    | <b>762.374057</b> | 381.690667      | 745.347508        | 373.177392        | <b>744.363492</b> | 372.685384        | 7  |
| 6  | 505.240524        | 253.123900      |                |                  |                   | 487.229959        | G    | <b>675.342029</b> | 338.174653      | <b>658.315480</b> | 329.661378        | 657.331464        | 329.169370        | 6  |
| 7  | 633.299102        | 317.153189      | 616.272553     | 308.639914       | <b>615.288537</b> | 308.147906        | Q    | 618.320565        | 309.663921      | <b>601.294016</b> | 301.150646        | 600.310000        | 300.658638        | 5  |
| 8  | 732.367516        | 366.687396      | 715.340967     | 358.174121       | 714.356951        | 357.682113        | V    | <b>490.261987</b> | 245.634631      | 473.235438        | 237.121357        | 472.251422        | 236.629349        | 4  |
| 9  | <b>819.399544</b> | 410.203410      | 802.372995     | 401.690135       | 801.388979        | 401.198127        | S    | <b>391.193573</b> | 196.100425      | 374.167024        | 187.587150        | 373.183008        | 187.095142        | 3  |
| 10 | 948.442137        | 474.724706      | 931.415588     | 466.211432       | 930.431572        | 465.719424        | E    | <b>304.161545</b> | 152.584411      | 287.134996        | 144.071136        | 286.150980        | 143.579128        | 2  |
| 11 |                   |                 |                |                  |                   |                   | R    | <b>175.118952</b> | 88.063114       | <b>158.092403</b> | 79.549840         |                   |                   | 1  |

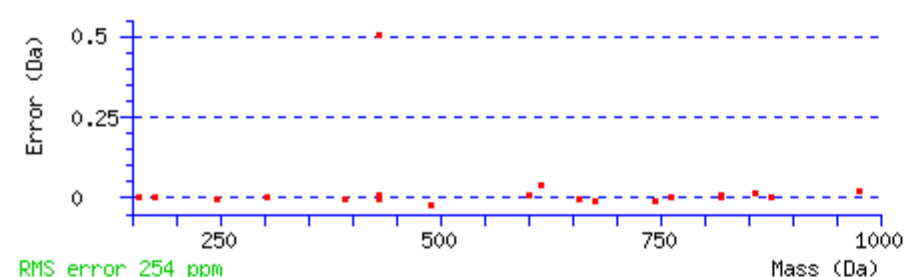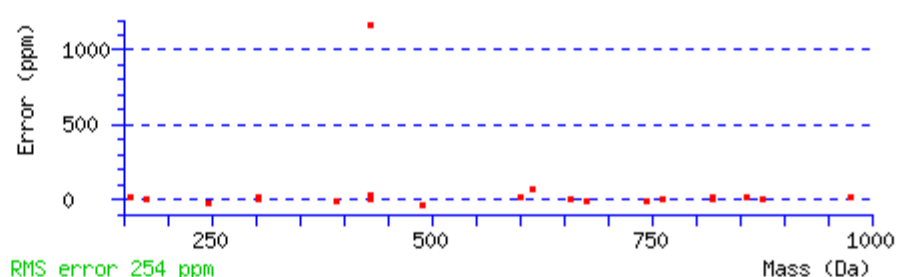

NCBI BLAST search of **FVGGSGQVSER**

(Parameters: blastp, nr protein database, expect=20000, no filter, PAM30)

Other BLAST [web gateways](#)

All matches to this query

| Score | Mr(calc):   | Delta     | Sequence                     |
|-------|-------------|-----------|------------------------------|
| 56.1  | 1121.546555 | -0.001607 | <a href="#">FVGGSGQVSER</a>  |
| 6.0   | 1121.538681 | 0.006267  | <a href="#">VTSLPAMTDR</a>   |
| 0.7   | 1121.538666 | 0.006282  | <a href="#">DSLGGNSKTIM</a>  |
| 0.4   | 1121.542725 | 0.002223  | <a href="#">FPQSVVTPM</a>    |
| 0.4   | 1121.542694 | 0.002254  | <a href="#">FVKTPAAPM</a>    |
| 0.4   | 1121.542694 | 0.002254  | <a href="#">FVKTPAAPM</a>    |
| 0.4   | 1121.542694 | 0.002254  | <a href="#">FVKTPAAPM</a>    |
| 0.4   | 1121.535309 | 0.009639  | <a href="#">FVPGSSQSE GK</a> |

Mascot: <http://www.matrixscience.com/>



# **MASCOT** Mascot Search Results

## Peptide View

MS/MS Fragmentation of **VLLSDSNLHDA**

Found in **CPIN1\_HUMAN**, Anamorsin OS=Homo sapiens GN=CIAPIN1 PE=1 SV=2

Match to Query 28395: 1182.596628 from(592.305590,2+) rtinseconds(2050) index(23025)

Title: Locus:1.1.1.2198.39

Data file 2011-11-12 - TFD - EP 5-4.mgf

Click mouse within plot area to zoom in by factor of two about that point

Or, Plot from  to  Da

Label all possible matches  Label matches used for scoring

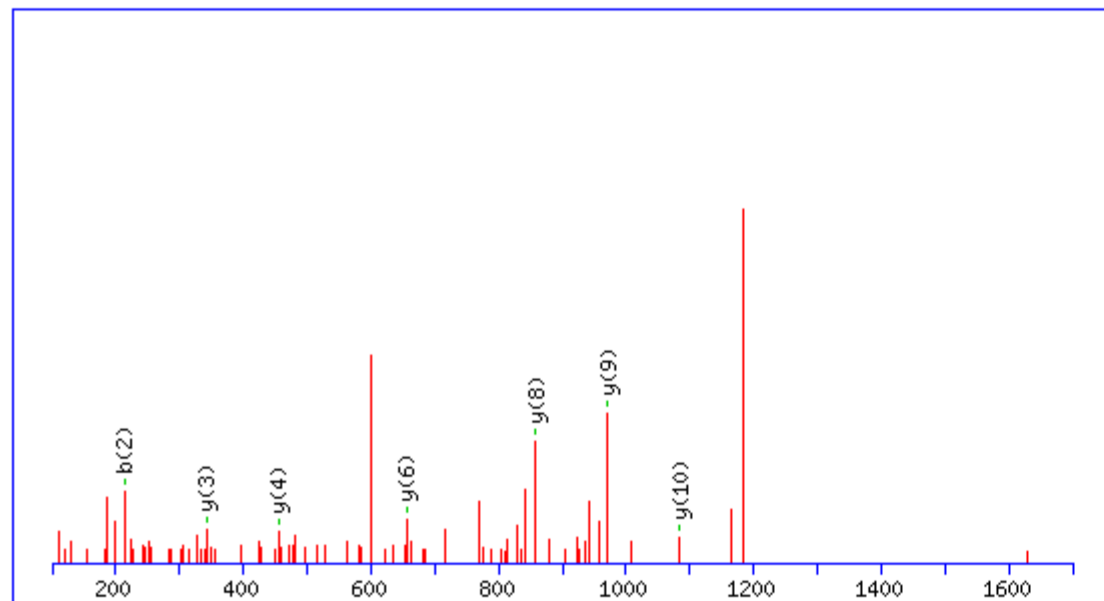

Monoisotopic mass of neutral peptide Mr(calc): 1182.588058

Fixed modifications: Propionamide (C) (apply to specified residues or termini only)

Ions Score: 42 Expect: 0.00072

Matches : 7/92 fragment ions using 11 most intense peaks ([help](#))

| #  | b           | b <sup>++</sup> | b <sup>*</sup> | b <sup>*++</sup> | b <sup>0</sup> | b <sup>0++</sup> | Seq. | y           | y <sup>++</sup> | y <sup>*</sup> | y <sup>*++</sup> | y <sup>0</sup> | y <sup>0++</sup> | #  |
|----|-------------|-----------------|----------------|------------------|----------------|------------------|------|-------------|-----------------|----------------|------------------|----------------|------------------|----|
| 1  | 100.075690  | 50.541483       |                |                  |                |                  | V    |             |                 |                |                  |                |                  | 11 |
| 2  | 213.159754  | 107.083515      |                |                  |                |                  | L    | 1084.526928 | 542.767102      | 1067.500379    | 534.253827       | 1066.516363    | 533.761819       | 10 |
| 3  | 326.243818  | 163.625547      |                |                  |                |                  | L    | 971.442864  | 486.225070      | 954.416315     | 477.711795       | 953.432299     | 477.219787       | 9  |
| 4  | 413.275846  | 207.141561      |                |                  | 395.265281     | 198.136278       | S    | 858.358800  | 429.683038      | 841.332251     | 421.169763       | 840.348235     | 420.677755       | 8  |
| 5  | 528.302789  | 264.655033      |                |                  | 510.292224     | 255.649750       | D    | 771.326772  | 386.167024      | 754.300223     | 377.653749       | 753.316207     | 377.161741       | 7  |
| 6  | 615.334817  | 308.171046      |                |                  | 597.324252     | 299.165764       | S    | 656.299829  | 328.653552      | 639.273280     | 320.140278       | 638.289264     | 319.648270       | 6  |
| 7  | 729.377744  | 365.192510      | 712.351195     | 356.679235       | 711.367179     | 356.187227       | N    | 569.267801  | 285.137539      | 552.241252     | 276.624264       | 551.257236     | 276.132256       | 5  |
| 8  | 842.461808  | 421.734542      | 825.435259     | 413.221267       | 824.451243     | 412.729259       | L    | 455.224874  | 228.116075      |                |                  | 437.214309     | 219.110792       | 4  |
| 9  | 979.520720  | 490.263998      | 962.494171     | 481.750723       | 961.510155     | 481.258715       | H    | 342.140810  | 171.574043      |                |                  | 324.130245     | 162.568760       | 3  |
| 10 | 1094.547663 | 547.777469      | 1077.521114    | 539.264195       | 1076.537098    | 538.772187       | D    | 205.081898  | 103.044587      |                |                  | 187.071333     | 94.039304        | 2  |
| 11 |             |                 |                |                  |                |                  | A    | 90.054955   | 45.531115       |                |                  |                |                  | 1  |

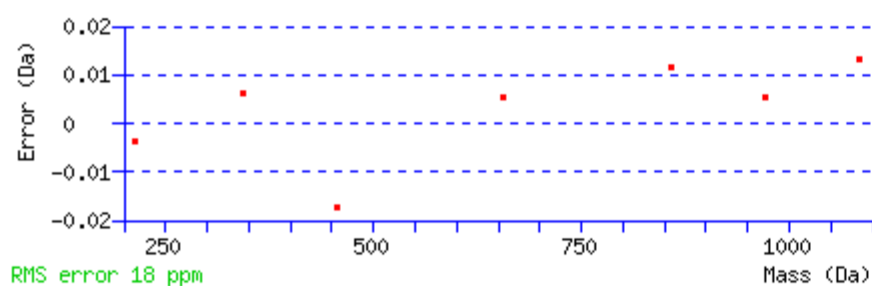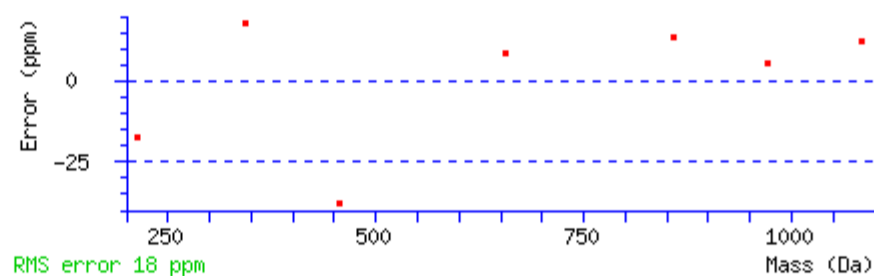

NCBI BLAST search of **VLLSDSNLHDA**

(Parameters: blastp, nr protein database, expect=20000, no filter, PAM30)

Other BLAST [web gateways](#)

All matches to this query

| Score | Mr(calc):   | Delta    | Sequence                    |
|-------|-------------|----------|-----------------------------|
| 42.0  | 1182.588058 | 0.008570 | <a href="#">VLLSDSNLHDA</a> |

Mascot: <http://www.matrixscience.com/>

# MASCOT Search Results

## Peptide View

MS/MS Fragmentation of **DLIALANTAGEVLLHR**

Found in **APC4\_HUMAN**, Anaphase-promoting complex subunit 4 OS=Homo sapiens GN=ANAPC4 PE=1 SV=2

Match to Query 25771: 1704.947742 from(569.323190,3+) rtinseconds(4372) index(65895)

Title: Locus:1.1.1.3039.9

Data file 2011-11-12 - TFD - EP 6-2.mgf

Click mouse within plot area to zoom in by factor of two about that point

Or, Plot from  to  Da

Label all possible matches  Label matches used for scoring

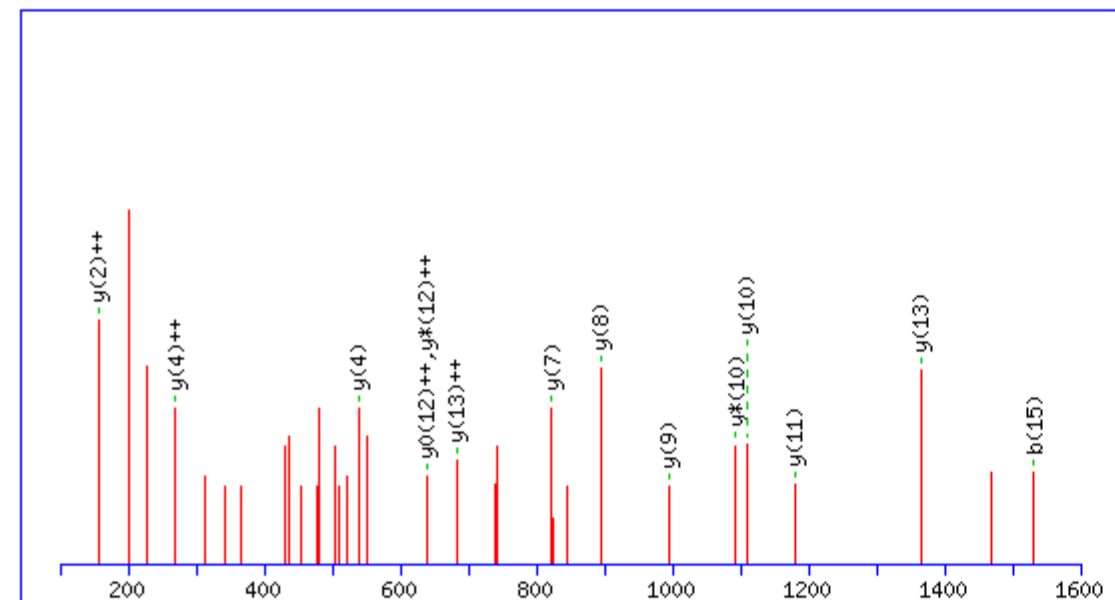

Monoisotopic mass of neutral peptide Mr(calc): 1704.952240

Fixed modifications: Propionamide (C) (apply to specified residues or termini only)

Ions Score: 41 Expect: 0.00026

Matches : 14/158 fragment ions using 22 most intense peaks [\(help\)](#)

| #  | b                  | b <sup>++</sup> | b <sup>*</sup> | b <sup>*++</sup> | b <sup>0</sup> | b <sup>0++</sup> | Seq. | y                  | y <sup>++</sup>   | y <sup>*</sup>     | y <sup>*++</sup>  | y <sup>0</sup> | y <sup>0++</sup>  | #  |
|----|--------------------|-----------------|----------------|------------------|----------------|------------------|------|--------------------|-------------------|--------------------|-------------------|----------------|-------------------|----|
| 1  | 116.034219         | 58.520748       |                |                  | 98.023654      | 49.515465        | D    |                    |                   |                    |                   |                |                   | 16 |
| 2  | 229.118283         | 115.062779      |                |                  | 211.107718     | 106.057497       | L    | 1590.932603        | 795.969939        | 1573.906054        | 787.456665        | 1572.922038    | 786.964657        | 15 |
| 3  | 342.202347         | 171.604811      |                |                  | 324.191782     | 162.599529       | I    | 1477.848539        | 739.427907        | 1460.821990        | 730.914633        | 1459.837974    | 730.422625        | 14 |
| 4  | 413.239461         | 207.123368      |                |                  | 395.228896     | 198.118086       | A    | <b>1364.764475</b> | <b>682.885875</b> | 1347.737926        | 674.372601        | 1346.753910    | 673.880593        | 13 |
| 5  | 526.323525         | 263.665401      |                |                  | 508.312960     | 254.660118       | L    | 1293.727361        | 647.367319        | 1276.700812        | <b>638.854044</b> | 1275.716796    | <b>638.362036</b> | 12 |
| 6  | 597.360639         | 299.183958      |                |                  | 579.350074     | 290.178675       | A    | <b>1180.643297</b> | 590.825286        | 1163.616748        | 582.312012        | 1162.632732    | 581.820004        | 11 |
| 7  | 711.403566         | 356.205421      | 694.377017     | 347.692146       | 693.393001     | 347.200138       | N    | <b>1109.606183</b> | 555.306729        | <b>1092.579634</b> | 546.793455        | 1091.595618    | 546.301447        | 10 |
| 8  | 812.451245         | 406.729261      | 795.424696     | 398.215986       | 794.440680     | 397.723978       | T    | <b>995.563256</b>  | 498.285266        | 978.536707         | 489.771991        | 977.552691     | 489.279983        | 9  |
| 9  | 883.488359         | 442.247818      | 866.461810     | 433.734543       | 865.477794     | 433.242535       | A    | <b>894.515577</b>  | 447.761426        | 877.489028         | 439.248152        | 876.505012     | 438.756144        | 8  |
| 10 | 940.509823         | 470.758550      | 923.483274     | 462.245275       | 922.499258     | 461.753267       | G    | <b>823.478463</b>  | 412.242869        | 806.451914         | 403.729595        | 805.467898     | 403.237587        | 7  |
| 11 | 1069.552416        | 535.279846      | 1052.525867    | 526.766572       | 1051.541851    | 526.274564       | E    | 766.456999         | 383.732137        | 749.430450         | 375.218863        | 748.446434     | 374.726855        | 6  |
| 12 | 1168.620830        | 584.814053      | 1151.594281    | 576.300779       | 1150.610265    | 575.808771       | V    | 637.414406         | 319.210841        | 620.387857         | 310.697566        |                |                   | 5  |
| 13 | 1281.704894        | 641.356085      | 1264.678345    | 632.842811       | 1263.694329    | 632.350802       | L    | <b>538.345992</b>  | <b>269.676634</b> | 521.319443         | 261.163359        |                |                   | 4  |
| 14 | 1394.788958        | 697.898117      | 1377.762409    | 689.384842       | 1376.778393    | 688.892834       | L    | 425.261928         | 213.134602        | 408.235379         | 204.621327        |                |                   | 3  |
| 15 | <b>1531.847870</b> | 766.427573      | 1514.821321    | 757.914298       | 1513.837305    | 757.422290       | H    | 312.177864         | <b>156.592570</b> | 295.151315         | 148.079295        |                |                   | 2  |
| 16 |                    |                 |                |                  |                |                  | R    | 175.118952         | 88.063114         | 158.092403         | 79.549839         |                |                   | 1  |

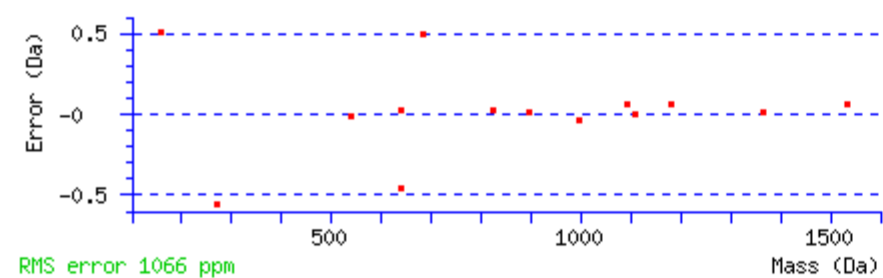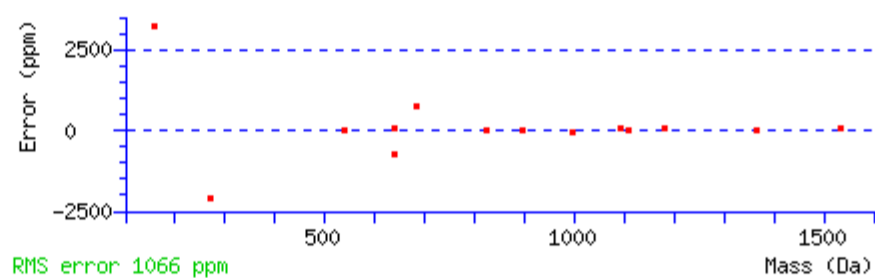

NCBI BLAST search of **DLIALANTAGEVLLHR**

(Parameters: blastp, nr protein database, expect=20000, no filter, PAM30)

Other BLAST [web gateways](#)

All matches to this query

| Score | Mr(calc):   | Delta     | Sequence                         |
|-------|-------------|-----------|----------------------------------|
| 41.0  | 1704.952240 | -0.004498 | <a href="#">DLIALANTAGEVLLHR</a> |
| 2.7   | 1704.938324 | 0.009418  | <a href="#">AQISSPNLRTRPPPR</a>  |
| 2.7   | 1704.938324 | 0.009418  | <a href="#">AQISSPNLRTRPPPR</a>  |
| 2.7   | 1704.938324 | 0.009418  | <a href="#">AQISSPNLRTRPPPR</a>  |
| 1.1   | 1704.941025 | 0.006717  | <a href="#">LLGQPSLDSLPIAPR</a>  |
| 1.1   | 1704.941025 | 0.006717  | <a href="#">LLGQPSLDSLPIAPR</a>  |

# MASCOT Search Results

## Peptide View

MS/MS Fragmentation of **MQYIERSALR**

Found in **ANKKI\_HUMAN**, Ankyrin repeat and protein kinase domain-containing protein 1 OS=Homo sapiens GN=ANKK1 PE=1 SV=1

Match to Query 34402: 1265.645652 from(422.889160,3+) rtinseconds(1965) index(21924)

Title: Locus:1.1.1.2092.5

Data file 2011-11-10 - TFD - EP 3-4.mgf

Click mouse within plot area to zoom in by factor of two about that point

Or, Plot from  to  Da

Label all possible matches  Label matches used for scoring

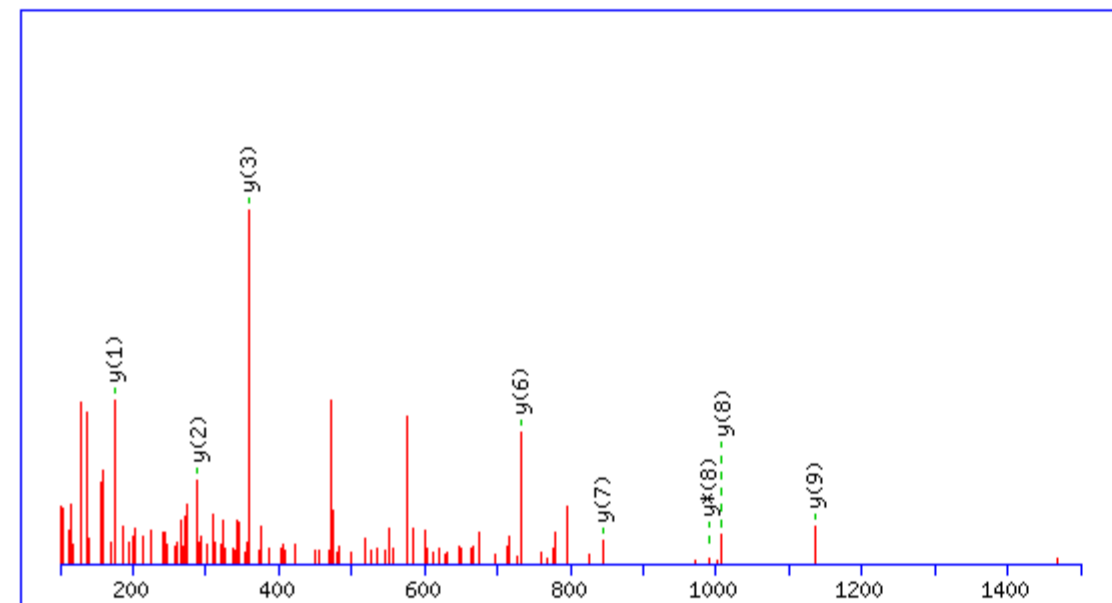

Monoisotopic mass of neutral peptide Mr(calc): 1265.654999

Fixed modifications: Propionamide (C) (apply to specified residues or termini only)

Ions Score: 56 Expect: 2.8e-005

Matches: 8/92 fragment ions using 11 most intense peaks [\(help\)](#)

| #  | b           | b <sup>++</sup> | b <sup>*</sup> | b <sup>+++</sup> | b <sup>0</sup> | b <sup>0++</sup> | Seq. | y                  | y <sup>++</sup> | y <sup>*</sup>    | y <sup>+++</sup> | y <sup>0</sup> | y <sup>0++</sup> | #  |
|----|-------------|-----------------|----------------|------------------|----------------|------------------|------|--------------------|-----------------|-------------------|------------------|----------------|------------------|----|
| 1  | 132.047761  | 66.527518       |                |                  |                |                  | M    |                    |                 |                   |                  |                |                  | 10 |
| 2  | 260.106339  | 130.556807      | 243.079790     | 122.043533       |                |                  | Q    | <b>1135.621833</b> | 568.314554      | 1118.595284       | 559.801280       | 1117.611268    | 559.309272       | 9  |
| 3  | 423.169668  | 212.088472      | 406.143119     | 203.575198       |                |                  | Y    | <b>1007.563255</b> | 504.285265      | <b>990.536706</b> | 495.771991       | 989.552690     | 495.279983       | 8  |
| 4  | 536.253732  | 268.630504      | 519.227183     | 260.117230       |                |                  | I    | <b>844.499926</b>  | 422.753601      | 827.473377        | 414.240326       | 826.489361     | 413.748318       | 7  |
| 5  | 665.296325  | 333.151801      | 648.269776     | 324.638526       | 647.285760     | 324.146518       | E    | <b>731.415862</b>  | 366.211569      | 714.389313        | 357.698294       | 713.405297     | 357.206286       | 6  |
| 6  | 821.397436  | 411.202356      | 804.370887     | 402.689081       | 803.386871     | 402.197073       | R    | 602.373269         | 301.690272      | 585.346720        | 293.176998       | 584.362704     | 292.684990       | 5  |
| 7  | 908.429464  | 454.718370      | 891.402915     | 446.205095       | 890.418899     | 445.713087       | S    | 446.272158         | 223.639717      | 429.245609        | 215.126442       | 428.261593     | 214.634434       | 4  |
| 8  | 979.466578  | 490.236927      | 962.440029     | 481.723652       | 961.456013     | 481.231644       | A    | <b>359.240130</b>  | 180.123703      | 342.213581        | 171.610428       |                |                  | 3  |
| 9  | 1092.550642 | 546.778959      | 1075.524093    | 538.265685       | 1074.540077    | 537.773676       | L    | <b>288.203016</b>  | 144.605146      | 271.176467        | 136.091871       |                |                  | 2  |
| 10 |             |                 |                |                  |                |                  | R    | <b>175.118952</b>  | 88.063114       | 158.092403        | 79.549839        |                |                  | 1  |

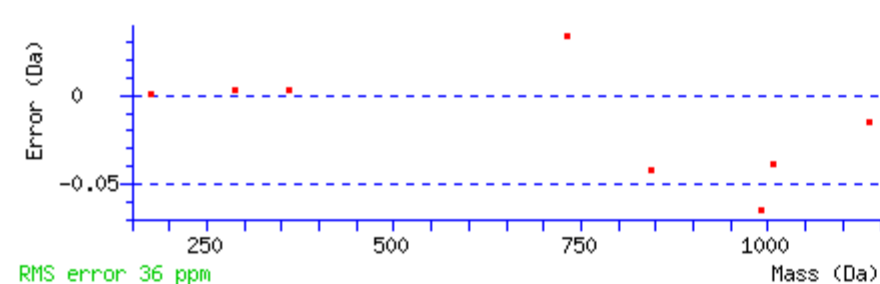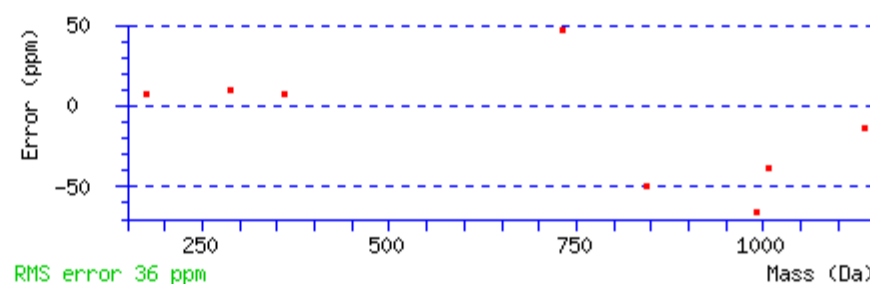

NCBI BLAST search of [MQYIERSALR](#)

(Parameters: blastp, nr protein database, expect=20000, no filter, PAM30)

Other BLAST [web gateways](#)

## All matches to this query

| Score | Mr(calc):   | Delta     | Sequence                     |
|-------|-------------|-----------|------------------------------|
| 66.0  | 1265.643753 | 0.001899  | <a href="#">MKYENELALR</a>   |
| 55.9  | 1265.654999 | -0.009347 | <a href="#">MQYIERSALR</a>   |
| 27.1  | 1265.643768 | 0.001884  | <a href="#">EFKMNIEALR</a>   |
| 9.4   | 1265.643799 | 0.001853  | <a href="#">YLQAVVSSMPR</a>  |
| 7.1   | 1265.636414 | 0.009238  | <a href="#">APDALSHTPSVR</a> |
| 6.6   | 1265.643814 | 0.001838  | <a href="#">YPVGVSNMVLRL</a> |
| 6.5   | 1265.643799 | 0.001853  | <a href="#">YLQAVVSSMPR</a>  |
| 5.8   | 1265.651672 | -0.006020 | <a href="#">WHQVETPLR</a>    |
| 4.3   | 1265.651169 | -0.005517 | <a href="#">AGLYMKMEPVK</a>  |
| 2.5   | 1265.655014 | -0.009362 | <a href="#">MQTAYGIKAQR</a>  |

# MASCOT Search Results

## Peptide View

MS/MS Fragmentation of **KPVNLNK**

Found in **AN30B\_HUMAN**, Ankyrin repeat domain-containing protein 30B OS=Homo sapiens GN=ANKRD30B PE=2 SV=2

Match to Query 35547: 827.481948 from(414.748250,2+) rtinseconds(2429) index(185076)

Title: Locus:1.1.1.1614.4

Data file C:\Program Files (x86)\Matrix Science\Mascot Daemon\mgf3 TFD - Epitel - R2\mascot\_daemon\_merge.mgf

Click mouse within plot area to zoom in by factor of two about that point

Or,   to  Da

Label all possible matches  Label matches used for scoring

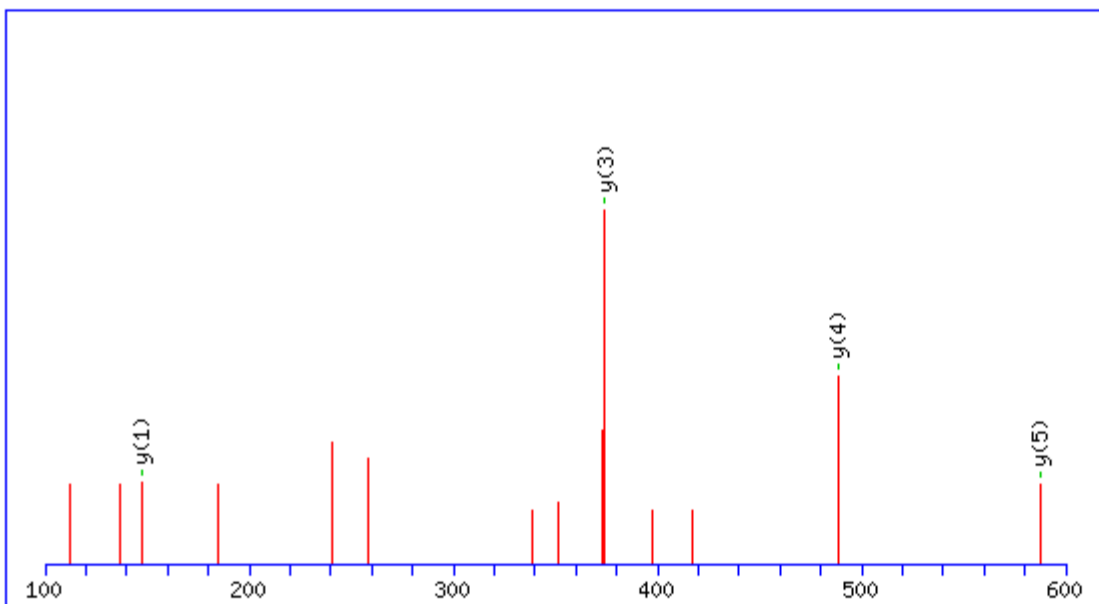

Monoisotopic mass of neutral peptide Mr(calc): 827.486481

Fixed modifications: Carbamidomethyl (C) (apply to specified residues or termini only)

Variable modifications:

P2 : Oxidation (P)

Ions Score: 34 Expect: 0.0053

Matches : 4/48 fragment ions using 5 most intense peaks ([help](#))

| # | b          | b <sup>++</sup> | b <sup>*</sup> | b <sup>*++</sup> | Seq.     | y                 | y <sup>++</sup> | y <sup>*</sup> | y <sup>*++</sup> | # |
|---|------------|-----------------|----------------|------------------|----------|-------------------|-----------------|----------------|------------------|---|
| 1 | 129.102239 | 65.054757       | 112.075690     | 56.541483        | <b>K</b> |                   |                 |                |                  | 7 |
| 2 | 242.149918 | 121.578597      | 225.123369     | 113.065322       | <b>P</b> | 700.398815        | 350.703046      | 683.372266     | 342.189771       | 6 |
| 3 | 341.218332 | 171.112804      | 324.191783     | 162.599529       | <b>V</b> | <b>587.351136</b> | 294.179206      | 570.324587     | 285.665932       | 5 |
| 4 | 455.261259 | 228.134267      | 438.234710     | 219.620993       | <b>N</b> | <b>488.282722</b> | 244.644999      | 471.256173     | 236.131724       | 4 |
| 5 | 568.345323 | 284.676300      | 551.318774     | 276.163025       | <b>L</b> | <b>374.239795</b> | 187.623535      | 357.213246     | 179.110261       | 3 |
| 6 | 682.388250 | 341.697763      | 665.361701     | 333.184488       | <b>N</b> | 261.155731        | 131.081503      | 244.129182     | 122.568229       | 2 |
| 7 |            |                 |                |                  | <b>K</b> | <b>147.112804</b> | 74.060040       | 130.086255     | 65.546765        | 1 |

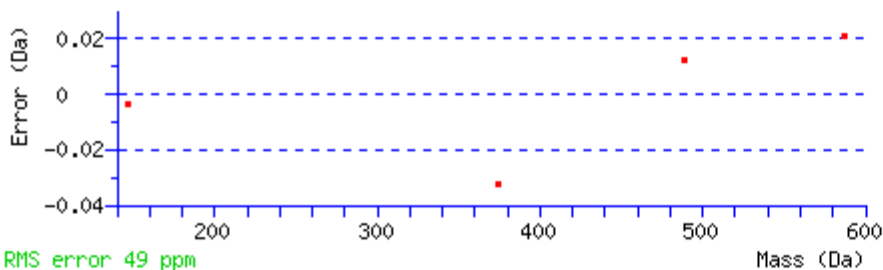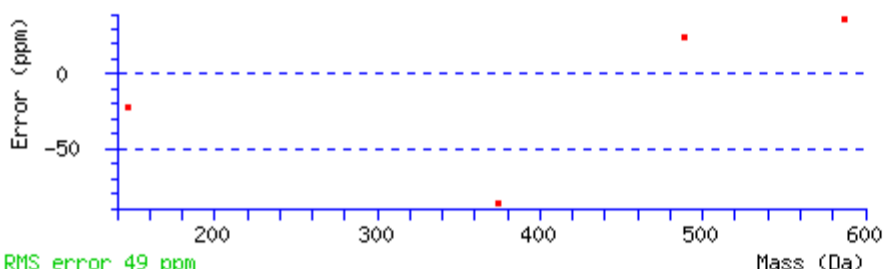

NCBI BLAST search of [KPVNLNK](#)

(Parameters: blastp, nr protein database, expect=20000, no filter, PAM30)

Other BLAST [web gateways](#)

## All matches to this query

| Score | Mr(calc):  | Delta     | Sequence                 |
|-------|------------|-----------|--------------------------|
| 34.3  | 827.486481 | -0.004533 | <a href="#">KPVNLNK</a>  |
| 21.5  | 827.475266 | 0.006682  | <a href="#">LQVDPLK</a>  |
| 19.0  | 827.486481 | -0.004533 | <a href="#">VIQNNLK</a>  |
| 9.6   | 827.486481 | -0.004533 | <a href="#">KAPVQAAK</a> |
| 8.6   | 827.475250 | 0.006698  | <a href="#">LQTIEPK</a>  |
| 7.3   | 827.486481 | -0.004533 | <a href="#">QLALQQK</a>  |
| 6.2   | 827.475250 | 0.006698  | <a href="#">SPAPSILK</a> |
| 2.8   | 827.486481 | -0.004533 | <a href="#">ANVGLNLK</a> |
| 2.8   | 827.475266 | 0.006682  | <a href="#">DLPPVKK</a>  |
| 2.8   | 827.475266 | 0.006682  | <a href="#">IPVEVQK</a>  |

**Peptide View**

MS/MS Fragmentation of **TDKRPPVSPSGR**

Found in **ANK2\_HUMAN**, Ankyrin-2 OS=Homo sapiens GN=ANK2 PE=1 SV=3

Match to Query 35881: 1327.679788 from(664.847170,2+) rtinseconds(1633) index(13481)

Title: Locus:1.1.1.2040.44

Data file 2011-11-13 - TFD - EP 7-5.mgf

Click mouse within plot area to zoom in by factor of two about that point

Or, Plot from  to  Da

Label all possible matches  Label matches used for scoring

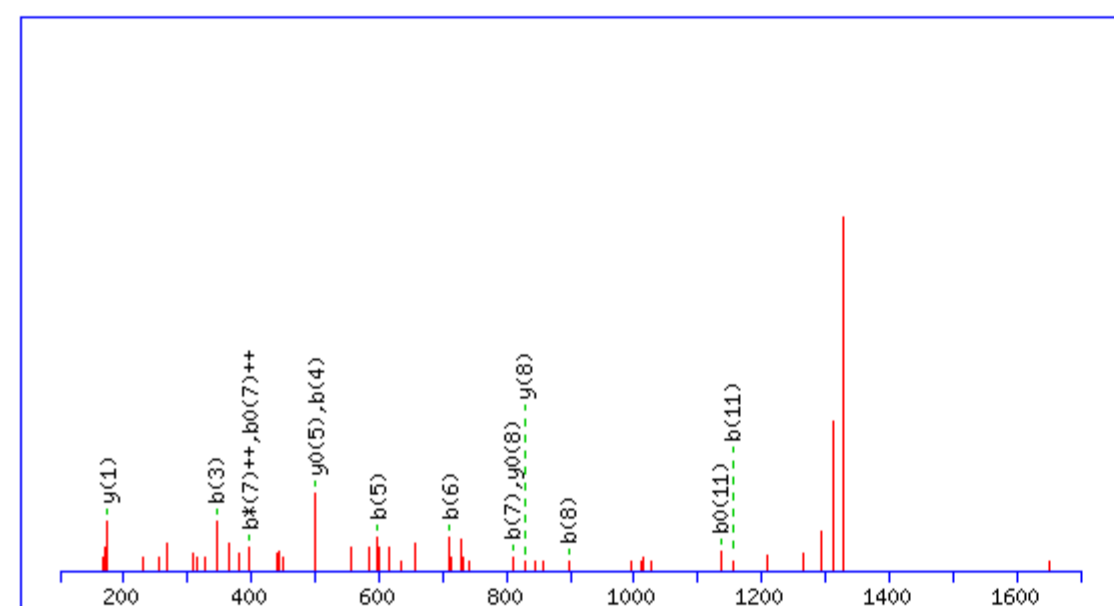

Monoisotopic mass of neutral peptide Mr(calc): 1327.684433

Fixed modifications: Propionamide (C) (apply to specified residues or termini only)

Variable modifications:

P6 : Oxidation (P)

P9 : Oxidation (P)

Ions Score: 47 Expect: 0.00028

Matches : 14/124 fragment ions using 23 most intense peaks [\(help\)](#)

| #  | b                  | b <sup>++</sup> | b <sup>*</sup> | b <sup>*++</sup>  | b <sup>0</sup>     | b <sup>0++</sup>  | Seq. | y                 | y <sup>++</sup> | y <sup>*</sup> | y <sup>*++</sup> | y <sup>0</sup>    | y <sup>0++</sup> | #  |
|----|--------------------|-----------------|----------------|-------------------|--------------------|-------------------|------|-------------------|-----------------|----------------|------------------|-------------------|------------------|----|
| 1  | 102.054955         | 51.531116       |                |                   | 84.044390          | 42.525833         | T    |                   |                 |                |                  |                   |                  | 12 |
| 2  | 217.081898         | 109.044587      |                |                   | 199.071333         | 100.039304        | D    | 1227.644025       | 614.325650      | 1210.617476    | 605.812376       | 1209.633460       | 605.320368       | 11 |
| 3  | <b>345.176861</b>  | 173.092068      | 328.150312     | 164.578794        | 327.166296         | 164.086786        | K    | 1112.617082       | 556.812179      | 1095.590533    | 548.298904       | 1094.606517       | 547.806896       | 10 |
| 4  | <b>501.277972</b>  | 251.142624      | 484.251423     | 242.629349        | 483.267407         | 242.137341        | R    | 984.522119        | 492.764697      | 967.495570     | 484.251423       | 966.511554        | 483.759415       | 9  |
| 5  | <b>598.330736</b>  | 299.669006      | 581.304187     | 291.155732        | 580.320171         | 290.663724        | P    | <b>828.421008</b> | 414.714142      | 811.394459     | 406.200867       | <b>810.410443</b> | 405.708859       | 8  |
| 6  | <b>711.378415</b>  | 356.192846      | 694.351866     | 347.679571        | 693.367850         | 347.187563        | P    | 731.368244        | 366.187760      | 714.341695     | 357.674485       | 713.357679        | 357.182477       | 7  |
| 7  | <b>810.446829</b>  | 405.727053      | 793.420280     | <b>397.213778</b> | 792.436264         | <b>396.721770</b> | V    | 618.320565        | 309.663920      | 601.294016     | 301.150646       | 600.310000        | 300.658638       | 6  |
| 8  | <b>897.478857</b>  | 449.243067      | 880.452308     | 440.729792        | 879.468292         | 440.237784        | S    | 519.252151        | 260.129713      | 502.225602     | 251.616439       | <b>501.241586</b> | 251.124431       | 5  |
| 9  | 1010.526536        | 505.766906      | 993.499987     | 497.253631        | 992.515971         | 496.761623        | P    | 432.220123        | 216.613699      | 415.193574     | 208.100425       | 414.209558        | 207.608417       | 4  |
| 10 | 1097.558564        | 549.282920      | 1080.532015    | 540.769646        | 1079.547999        | 540.277637        | S    | 319.172444        | 160.089860      | 302.145895     | 151.576585       | 301.161879        | 151.084577       | 3  |
| 11 | <b>1154.580028</b> | 577.793652      | 1137.553479    | 569.280377        | <b>1136.569463</b> | 568.788369        | G    | 232.140416        | 116.573846      | 215.113867     | 108.060571       |                   |                  | 2  |
| 12 |                    |                 |                |                   |                    |                   | R    | <b>175.118952</b> | 88.063114       | 158.092403     | 79.549839        |                   |                  | 1  |

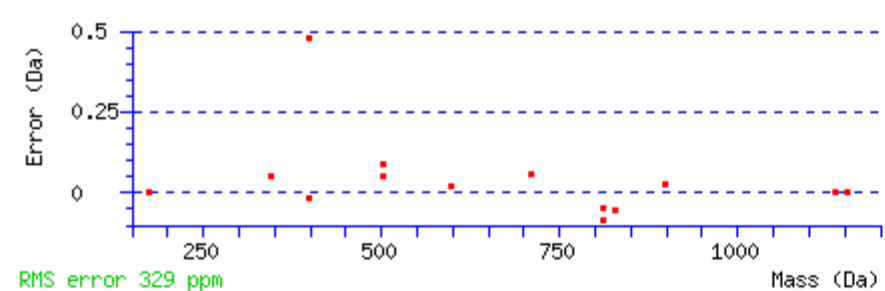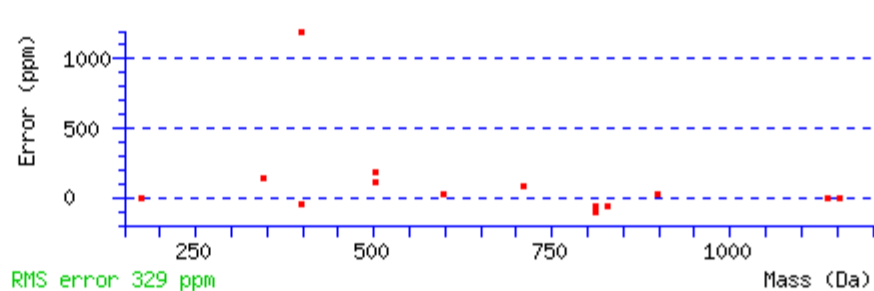

NCBI BLAST search of **TDKRPPVSPSGR**

(Parameters: blastp, nr protein database, expect=20000, no filter, PAM30)

Other BLAST [web gateways](#)

**All matches to this query**

| Score | Mr(calc):   | Delta     | Sequence                     |
|-------|-------------|-----------|------------------------------|
| 47.2  | 1327.684433 | -0.004645 | <a href="#">TDKRPPVSPSGR</a> |
| 34.9  | 1327.684433 | -0.004645 | <a href="#">TDKRPPVSPSGR</a> |
| 15.6  | 1327.691788 | -0.012000 | <a href="#">AAVQMDPELAKR</a> |
| 14.8  | 1327.685303 | -0.005515 | <a href="#">VVQCMHKVTGR</a>  |
| 14.7  | 1327.673203 | 0.006585  | <a href="#">TESPQGLPTVQR</a> |
| 13.9  | 1327.673203 | 0.006585  | <a href="#">TESPQGLPTVQR</a> |
| 12.7  | 1327.688431 | -0.008643 | <a href="#">AAGPELRVEGWK</a> |
| 10.5  | 1327.673172 | 0.006616  | <a href="#">ATPSENLPSSAR</a> |
| 9.8   | 1327.688461 | -0.008673 | <a href="#">NFTILQGPPGPR</a> |
| 8.6   | 1327.674515 | 0.005273  | <a href="#">RGHPAPPAPGSR</a> |

**Peptide View**

MS/MS Fragmentation of **GAGTNEDALIEILTTR**

Found in **ANXA3\_HUMAN**, Annexin A3 OS=Homo sapiens GN=ANXA3 PE=1 SV=3

Match to Query 54713: 1672.862768 from(837.438660,2+) rtinseconds(3881) index(57470)

Title: Locus:1.1.1.2887.34

Data file 2011-11-12 - TFD - EP 5-4.mgf

Click mouse within plot area to zoom in by factor of two about that point

Or, Plot from  to  Da

Label all possible matches  Label matches used for scoring

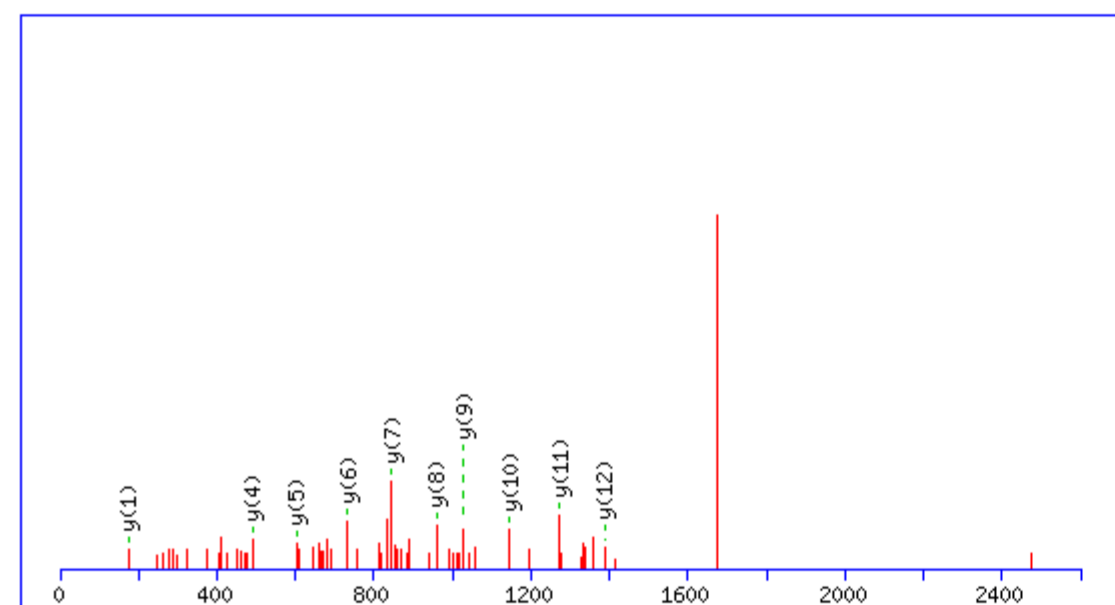

Monoisotopic mass of neutral peptide Mr(calc): 1672.863159

Fixed modifications: Propionamide (C) (apply to specified residues or termini only)

Ions Score: 88 Expect: 2.4e-008

Matches : 10/164 fragment ions using 13 most intense peaks [\(help\)](#)

| #  | b           | b <sup>++</sup> | b <sup>*</sup> | b <sup>*++</sup> | b <sup>0</sup> | b <sup>0++</sup> | Seq. | y                  | y <sup>++</sup> | y <sup>*</sup> | y <sup>*++</sup> | y <sup>0</sup> | y <sup>0++</sup> | #  |
|----|-------------|-----------------|----------------|------------------|----------------|------------------|------|--------------------|-----------------|----------------|------------------|----------------|------------------|----|
| 1  | 58.028740   | 29.518008       |                |                  |                |                  | G    |                    |                 |                |                  |                |                  | 16 |
| 2  | 129.065854  | 65.036565       |                |                  |                |                  | A    | 1616.848993        | 808.928134      | 1599.822444    | 800.414860       | 1598.838428    | 799.922852       | 15 |
| 3  | 186.087318  | 93.547297       |                |                  |                |                  | G    | 1545.811879        | 773.409577      | 1528.785330    | 764.896303       | 1527.801314    | 764.404295       | 14 |
| 4  | 287.134997  | 144.071136      |                |                  | 269.124432     | 135.065854       | T    | 1488.790415        | 744.898845      | 1471.763866    | 736.385571       | 1470.779850    | 735.893563       | 13 |
| 5  | 401.177924  | 201.092600      | 384.151375     | 192.579326       | 383.167359     | 192.087318       | N    | <b>1387.742736</b> | 694.375006      | 1370.716187    | 685.861731       | 1369.732171    | 685.369723       | 12 |
| 6  | 530.220517  | 265.613897      | 513.193968     | 257.100622       | 512.209952     | 256.608614       | E    | <b>1273.699809</b> | 637.353542      | 1256.673260    | 628.840268       | 1255.689244    | 628.348260       | 11 |
| 7  | 645.247460  | 323.127368      | 628.220911     | 314.614094       | 627.236895     | 314.122086       | D    | <b>1144.657216</b> | 572.832246      | 1127.630667    | 564.318971       | 1126.646651    | 563.826963       | 10 |
| 8  | 716.284574  | 358.645925      | 699.258025     | 350.132651       | 698.274009     | 349.640643       | A    | <b>1029.630273</b> | 515.318774      | 1012.603724    | 506.805500       | 1011.619708    | 506.313492       | 9  |
| 9  | 829.368638  | 415.187957      | 812.342089     | 406.674683       | 811.358073     | 406.182675       | L    | <b>958.593159</b>  | 479.800217      | 941.566610     | 471.286943       | 940.582594     | 470.794935       | 8  |
| 10 | 942.452702  | 471.729989      | 925.426153     | 463.216715       | 924.442137     | 462.724707       | I    | <b>845.509095</b>  | 423.258185      | 828.482546     | 414.744911       | 827.498530     | 414.252903       | 7  |
| 11 | 1071.495295 | 536.251285      | 1054.468746    | 527.738011       | 1053.484730    | 527.246003       | E    | <b>732.425031</b>  | 366.716153      | 715.398482     | 358.202879       | 714.414466     | 357.710871       | 6  |
| 12 | 1184.579359 | 592.793317      | 1167.552810    | 584.280043       | 1166.568794    | 583.788035       | I    | <b>603.382438</b>  | 302.194857      | 586.355889     | 293.681582       | 585.371873     | 293.189574       | 5  |
| 13 | 1297.663423 | 649.335349      | 1280.636874    | 640.822075       | 1279.652858    | 640.330067       | L    | <b>490.298374</b>  | 245.652825      | 473.271825     | 237.139550       | 472.287809     | 236.647542       | 4  |
| 14 | 1398.711102 | 699.859189      | 1381.684553    | 691.345914       | 1380.700537    | 690.853906       | T    | 377.214310         | 189.110793      | 360.187761     | 180.597518       | 359.203745     | 180.105510       | 3  |
| 15 | 1499.758781 | 750.383028      | 1482.732232    | 741.869754       | 1481.748216    | 741.377746       | T    | 276.166631         | 138.586953      | 259.140082     | 130.073679       | 258.156066     | 129.581671       | 2  |
| 16 |             |                 |                |                  |                |                  | R    | <b>175.118952</b>  | 88.063114       | 158.092403     | 79.549839        |                |                  | 1  |

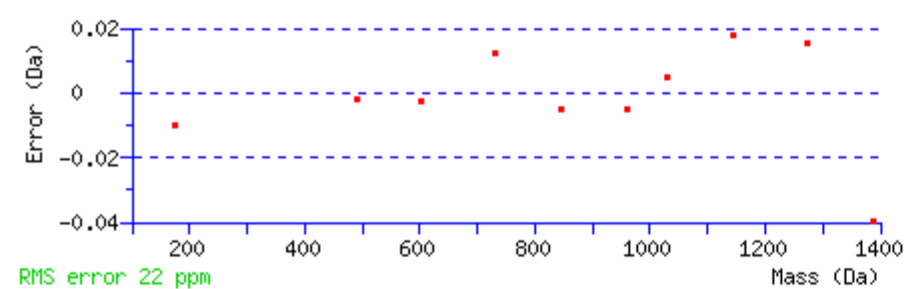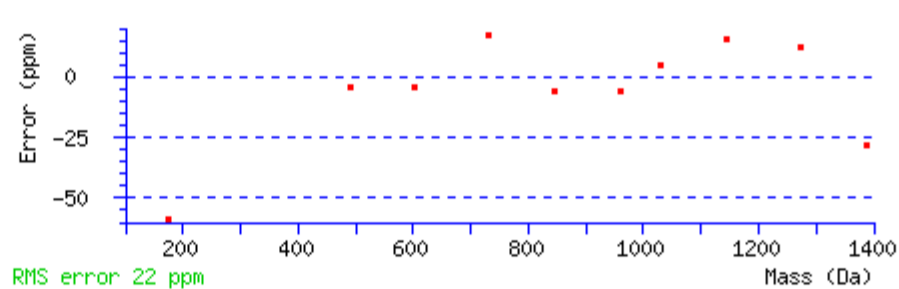

NCBI BLAST search of **GAGTNEDALIEILTTR**

(Parameters: blastp, nr protein database, expect=20000, no filter, PAM30)

Other BLAST [web gateways](#)

All matches to this query

| Score | Mr(calc):   | Delta     | Sequence                          |
|-------|-------------|-----------|-----------------------------------|
| 87.5  | 1672.863159 | -0.000391 | <a href="#">GAGTNEDALIEILTTR</a>  |
| 18.3  | 1672.878433 | -0.015665 | <a href="#">DGNDNVTLFAPLLR</a>    |
| 10.8  | 1672.856628 | 0.006140  | <a href="#">SLEAINGSGLQMGMLQR</a> |
| 2.4   | 1672.849472 | 0.013296  | <a href="#">GDPGPPGPPPVLPGMK</a>  |
| 0.4   | 1672.849472 | 0.013296  | <a href="#">GDPGPPGPPPVLPGMK</a>  |
| 0.4   | 1672.849472 | 0.013296  | <a href="#">GDPGPPGPPPVLPGMK</a>  |

# MASCOT Search Results

## Peptide View

MS/MS Fragmentation of **QVAAVGQEPQVFGR**

Found in **TAPI\_HUMAN**, Antigen peptide transporter 1 OS=Homo sapiens GN=TAP1 PE=1 SV=2

Match to Query 825999: 1484.766028 from(743.390290,2+) rtinseconds(2212) index(515985)

Title: Locus:1.1.1.1176.43

Data file C:\Program Files (x86)\Matrix Science\Mascot Daemon\mgf3 TFD - Epitel - R2\mascot\_daemon\_merge.mgf

Click mouse within plot area to zoom in by factor of two about that point

Or, Plot from  to  Da

Label all possible matches  Label matches used for scoring

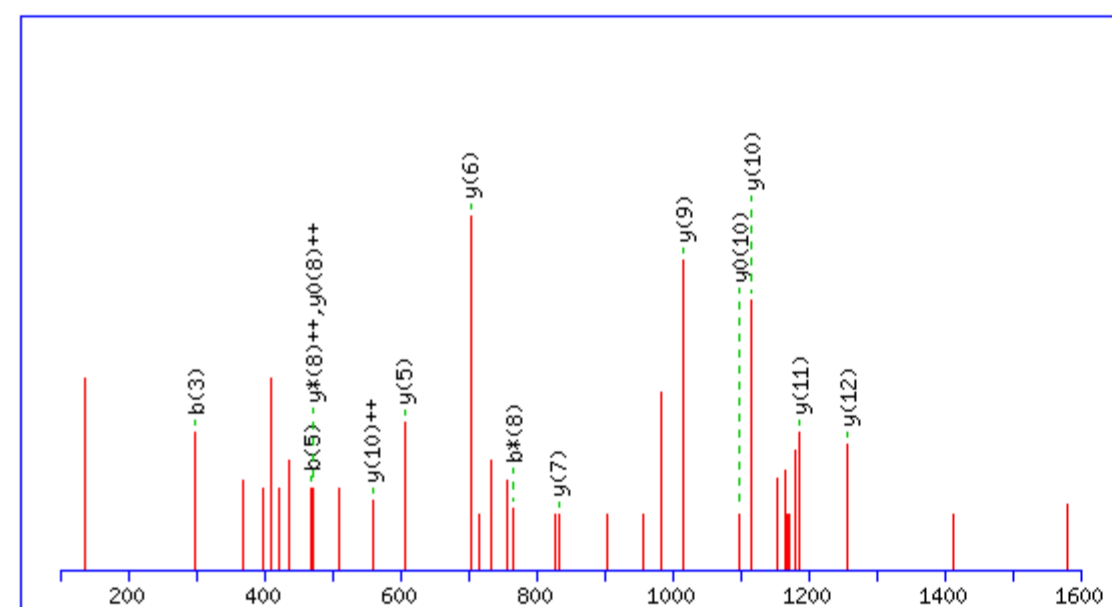

Monoisotopic mass of neutral peptide  $M_r(\text{calc})$ : 1484.773590

Fixed modifications: Carbamidomethyl (C) (apply to specified residues or termini only)

Ions Score: 37 Expect: 0.00065

Matches : 14/130 fragment ions using 27 most intense peaks ([help](#))

| #  | b                 | b <sup>++</sup> | b <sup>+</sup>    | b <sup>*++</sup> | b <sup>0</sup> | b <sup>0++</sup> | Seq. | y                  | y <sup>++</sup>   | y <sup>+</sup> | y <sup>*++</sup>  | y <sup>0</sup>     | y <sup>0++</sup>  | #  |
|----|-------------------|-----------------|-------------------|------------------|----------------|------------------|------|--------------------|-------------------|----------------|-------------------|--------------------|-------------------|----|
| 1  | 129.065854        | 65.036565       | 112.039305        | 56.523291        |                |                  | Q    |                    |                   |                |                   |                    |                   | 14 |
| 2  | 228.134268        | 114.570772      | 211.107719        | 106.057498       |                |                  | V    | 1357.722277        | 679.364777        | 1340.695728    | 670.851502        | 1339.711712        | 670.359494        | 13 |
| 3  | <b>299.171382</b> | 150.089329      | 282.144833        | 141.576055       |                |                  | A    | <b>1258.653863</b> | 629.830570        | 1241.627314    | 621.317295        | 1240.643298        | 620.825287        | 12 |
| 4  | 370.208496        | 185.607886      | 353.181947        | 177.094612       |                |                  | A    | <b>1187.616749</b> | 594.312013        | 1170.590200    | 585.798738        | 1169.606184        | 585.306730        | 11 |
| 5  | <b>469.276910</b> | 235.142093      | 452.250361        | 226.628819       |                |                  | V    | <b>1116.579635</b> | <b>558.793456</b> | 1099.553086    | 550.280181        | <b>1098.569070</b> | 549.788173        | 10 |
| 6  | 526.298374        | 263.652825      | 509.271825        | 255.139551       |                |                  | G    | <b>1017.511221</b> | 509.259249        | 1000.484672    | 500.745974        | 999.500656         | 500.253966        | 9  |
| 7  | 654.356952        | 327.682114      | 637.330403        | 319.168840       |                |                  | Q    | 960.489757         | 480.748517        | 943.463208     | <b>472.235242</b> | 942.479192         | <b>471.743234</b> | 8  |
| 8  | 783.399545        | 392.203411      | <b>766.372996</b> | 383.690136       | 765.388980     | 383.198128       | E    | <b>832.431179</b>  | 416.719228        | 815.404630     | 408.205953        | 814.420614         | 407.713945        | 7  |
| 9  | 880.452309        | 440.729793      | 863.425760        | 432.216518       | 862.441744     | 431.724510       | P    | <b>703.388586</b>  | 352.197931        | 686.362037     | 343.684657        |                    |                   | 6  |
| 10 | 1008.510887       | 504.759082      | 991.484338        | 496.245807       | 990.500322     | 495.753799       | Q    | <b>606.335822</b>  | 303.671549        | 589.309273     | 295.158275        |                    |                   | 5  |
| 11 | 1107.579301       | 554.293289      | 1090.552752       | 545.780014       | 1089.568736    | 545.288006       | V    | 478.277244         | 239.642260        | 461.250695     | 231.128986        |                    |                   | 4  |
| 12 | 1254.647715       | 627.827496      | 1237.621166       | 619.314221       | 1236.637150    | 618.822213       | F    | 379.208830         | 190.108053        | 362.182281     | 181.594778        |                    |                   | 3  |
| 13 | 1311.669179       | 656.338228      | 1294.642630       | 647.824953       | 1293.658614    | 647.332945       | G    | 232.140416         | 116.573846        | 215.113867     | 108.060571        |                    |                   | 2  |
| 14 |                   |                 |                   |                  |                |                  | R    | 175.118952         | 88.063114         | 158.092403     | 79.549839         |                    |                   | 1  |

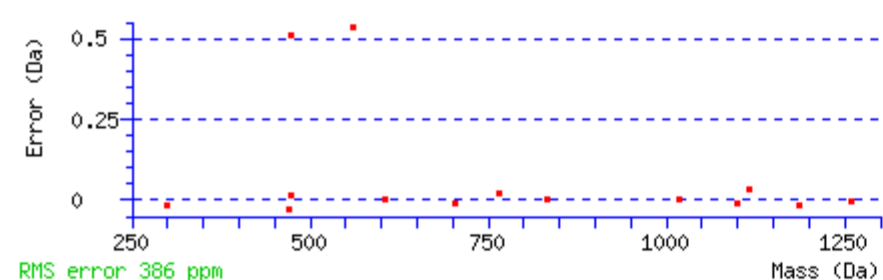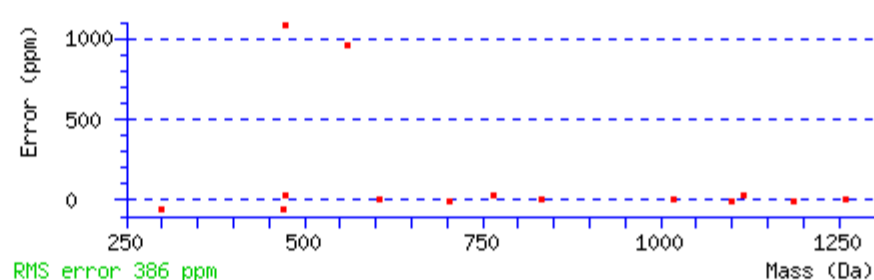

NCBI BLAST search of [QVAAVGQEPQVFGR](#)

(Parameters: blastp, nr protein database, expect=20000, no filter, PAM30)

Other BLAST [web gateways](#)

## All matches to this query

| Score | $M_r(\text{calc})$ : | Delta     | Sequence                        |
|-------|----------------------|-----------|---------------------------------|
| 36.7  | 1484.773590          | -0.007562 | <a href="#">QVAAVGQEPQVFGR</a>  |
| 2.6   | 1484.776932          | -0.010904 | <a href="#">GLQAVMAGLANGFVR</a> |
| 0.9   | 1484.752441          | 0.013587  | <a href="#">SPSPPRAGPFGYPR</a>  |

# Mascot Search Results

## Peptide View

MS/MS Fragmentation of **CLDPVDTPNPTR**

Found in **SLPI\_HUMAN**, Antileukoproteinase OS=Homo sapiens GN=SLPI PE=1 SV=2

Match to Query 34959: 1397.661328 from(699.837940,2+) rtinseconds(1870) index(14597)

Title: Locus:1.1.1.2118.50

Data file 2011-11-10 - TFD - EP 3-7.mgf

Click mouse within plot area to zoom in by factor of two about that point

Or, Plot from  to  Da

Label all possible matches  Label matches used for scoring

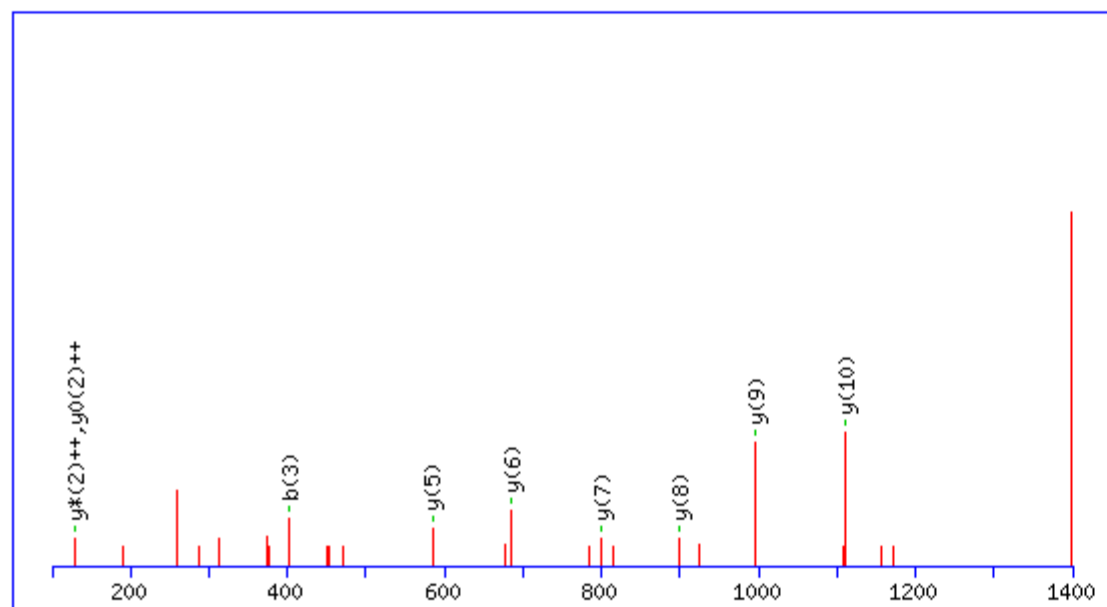

Monoisotopic mass of neutral peptide Mr(calc): 1397.660919

Fixed modifications: Propionamide (C) (apply to specified residues or termini only)

Ions Score: 43 Expect: 0.00052

Matches : 9/110 fragment ions using 11 most intense peaks [\(help\)](#)

| #  | b                 | b <sup>++</sup> | b*          | b <sup>+++</sup> | b <sup>0</sup> | b <sup>0++</sup> | Seq. | y                  | y <sup>++</sup> | y*          | y <sup>+++</sup>  | y <sup>0</sup> | y <sup>0++</sup>  | #  |
|----|-------------------|-----------------|-------------|------------------|----------------|------------------|------|--------------------|-----------------|-------------|-------------------|----------------|-------------------|----|
| 1  | 175.053575        | 88.030425       |             |                  |                |                  | C    |                    |                 |             |                   |                |                   | 12 |
| 2  | 288.137639        | 144.572457      |             |                  |                |                  | L    | 1224.621893        | 612.814585      | 1207.595344 | 604.301310        | 1206.611328    | 603.809302        | 11 |
| 3  | <b>403.164582</b> | 202.085929      |             |                  | 385.154017     | 193.080647       | D    | <b>1111.537829</b> | 556.272553      | 1094.511280 | 547.759278        | 1093.527264    | 547.267270        | 10 |
| 4  | 500.217346        | 250.612311      |             |                  | 482.206781     | 241.607028       | P    | <b>996.510886</b>  | 498.759081      | 979.484337  | 490.245807        | 978.500321     | 489.753799        | 9  |
| 5  | 599.285760        | 300.146518      |             |                  | 581.275195     | 291.141235       | V    | <b>899.458122</b>  | 450.232699      | 882.431573  | 441.719425        | 881.447557     | 441.227417        | 8  |
| 6  | 714.312703        | 357.659989      |             |                  | 696.302138     | 348.654707       | D    | <b>800.389708</b>  | 400.698492      | 783.363159  | 392.185218        | 782.379143     | 391.693210        | 7  |
| 7  | 815.360382        | 408.183829      |             |                  | 797.349817     | 399.178546       | T    | <b>685.362765</b>  | 343.185021      | 668.336216  | 334.671746        | 667.352200     | 334.179738        | 6  |
| 8  | 912.413146        | 456.710211      |             |                  | 894.402581     | 447.704928       | P    | <b>584.315086</b>  | 292.661181      | 567.288537  | 284.147907        | 566.304521     | 283.655899        | 5  |
| 9  | 1026.456073       | 513.731675      | 1009.429524 | 505.218400       | 1008.445508    | 504.726392       | N    | 487.262322         | 244.134799      | 470.235773  | 235.621525        | 469.251757     | 235.129517        | 4  |
| 10 | 1123.508837       | 562.258057      | 1106.482288 | 553.744782       | 1105.498272    | 553.252774       | P    | 373.219395         | 187.113335      | 356.192846  | 178.600061        | 355.208830     | 178.108053        | 3  |
| 11 | 1224.556516       | 612.781896      | 1207.529967 | 604.268622       | 1206.545951    | 603.776614       | T    | 276.166631         | 138.586953      | 259.140082  | <b>130.073679</b> | 258.156066     | <b>129.581671</b> | 2  |
| 12 |                   |                 |             |                  |                |                  | R    | 175.118952         | 88.063114       | 158.092403  | 79.549839         |                |                   | 1  |

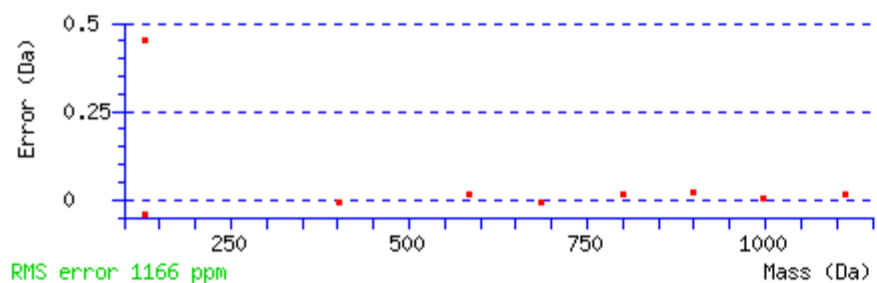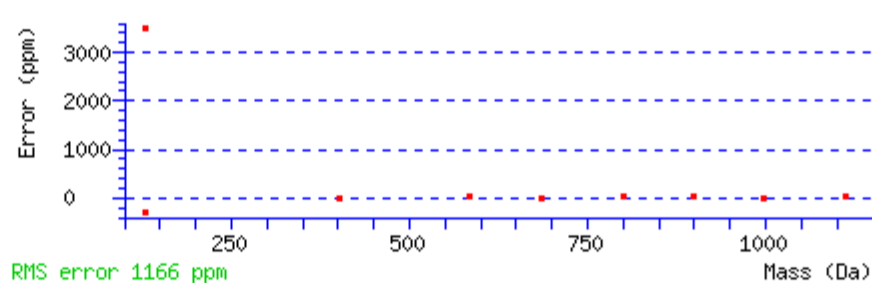

NCBI BLAST search of **CLDPVDTPNPTR**

(Parameters: blastp, nr protein database, expect=20000, no filter, PAM30)

Other BLAST [web gateways](#)

All matches to this query

| Score | Mr(calc):   | Delta    | Sequence                     |
|-------|-------------|----------|------------------------------|
| 42.8  | 1397.660919 | 0.000409 | <a href="#">CLDPVDTPNPTR</a> |

Mascot: <http://www.matrixscience.com/>



# Mascot Search Results

## Peptide View

MS/MS Fragmentation of **EVPLNTIIFMGR**

Found in **ANT3\_HUMAN**, Antithrombin-III OS=Homo sapiens GN=SERPINC1 PE=1 SV=1

Match to Query 38861: 1388.756588 from(695.385570,2+) rtinseconds(3588) index(53470)

Title: Locus:1.1.1.2784.26

Data file 2011-11-10 - TFD - EP 3-3.mgf

Click mouse within plot area to zoom in by factor of two about that point

Or, Plot from  to  Da

Label all possible matches  Label matches used for scoring

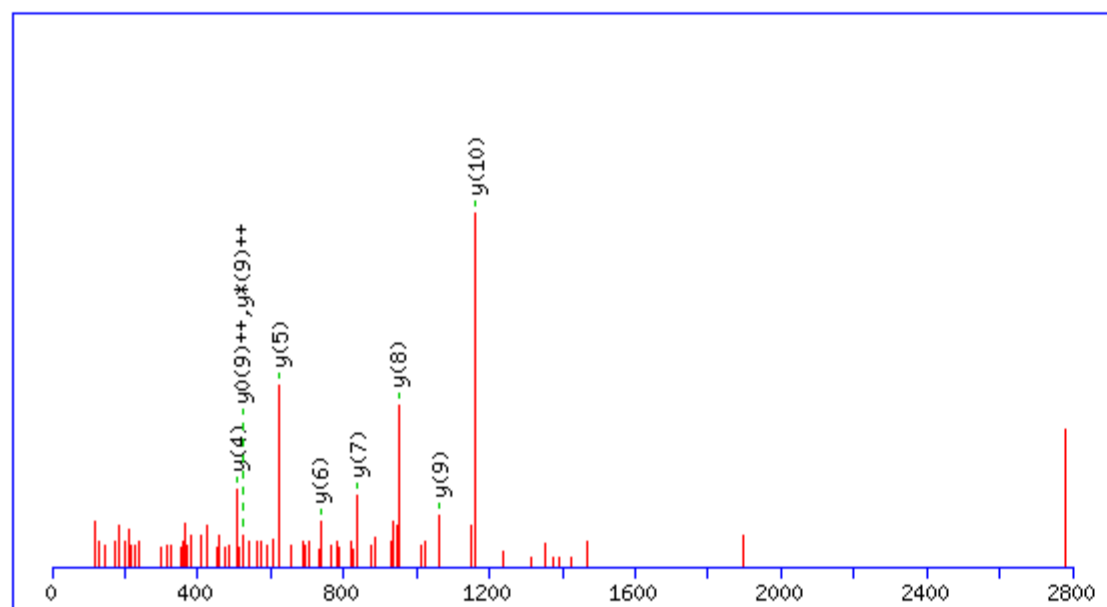

Monoisotopic mass of neutral peptide Mr(calc): 1388.748596

Fixed modifications: Propionamide (C) (apply to specified residues or termini only)

Ions Score: 50 Expect: 3.6e-005

Matches : 9/112 fragment ions using 13 most intense peaks [\(help\)](#)

| #  | b           | b <sup>++</sup> | b <sup>*</sup> | b <sup>*++</sup> | b <sup>0</sup> | b <sup>0++</sup> | Seq. | y                  | y <sup>++</sup> | y <sup>*</sup> | y <sup>*++</sup>  | y <sup>0</sup> | y <sup>0++</sup>  | #  |
|----|-------------|-----------------|----------------|------------------|----------------|------------------|------|--------------------|-----------------|----------------|-------------------|----------------|-------------------|----|
| 1  | 130.049869  | 65.528572       |                |                  | 112.039304     | 56.523290        | E    |                    |                 |                |                   |                |                   | 12 |
| 2  | 229.118283  | 115.062780      |                |                  | 211.107718     | 106.057497       | V    | 1260.713291        | 630.860283      | 1243.686742    | 622.347009        | 1242.702726    | 621.855001        | 11 |
| 3  | 326.171047  | 163.589161      |                |                  | 308.160482     | 154.583879       | P    | <b>1161.644877</b> | 581.326077      | 1144.618328    | 572.812802        | 1143.634312    | 572.320794        | 10 |
| 4  | 439.255111  | 220.131193      |                |                  | 421.244546     | 211.125911       | L    | <b>1064.592113</b> | 532.799694      | 1047.565564    | <b>524.286420</b> | 1046.581548    | <b>523.794412</b> | 9  |
| 5  | 553.298038  | 277.152657      | 536.271489     | 268.639383       | 535.287473     | 268.147375       | N    | <b>951.508049</b>  | 476.257662      | 934.481500     | 467.744388        | 933.497484     | 467.252380        | 8  |
| 6  | 654.345717  | 327.676497      | 637.319168     | 319.163222       | 636.335152     | 318.671214       | T    | <b>837.465122</b>  | 419.236199      | 820.438573     | 410.722924        | 819.454557     | 410.230916        | 7  |
| 7  | 767.429781  | 384.218529      | 750.403232     | 375.705254       | 749.419216     | 375.213246       | I    | <b>736.417443</b>  | 368.712359      | 719.390894     | 360.199085        |                |                   | 6  |
| 8  | 880.513845  | 440.760561      | 863.487296     | 432.247286       | 862.503280     | 431.755278       | I    | <b>623.333379</b>  | 312.170327      | 606.306830     | 303.657053        |                |                   | 5  |
| 9  | 1027.582259 | 514.294768      | 1010.555710    | 505.781493       | 1009.571694    | 505.289485       | F    | <b>510.249315</b>  | 255.628295      | 493.222766     | 247.115021        |                |                   | 4  |
| 10 | 1158.622744 | 579.815010      | 1141.596195    | 571.301736       | 1140.612179    | 570.809728       | M    | 363.180901         | 182.094088      | 346.154352     | 173.580814        |                |                   | 3  |
| 11 | 1215.644208 | 608.325742      | 1198.617659    | 599.812468       | 1197.633643    | 599.320459       | G    | 232.140416         | 116.573846      | 215.113867     | 108.060571        |                |                   | 2  |
| 12 |             |                 |                |                  |                |                  | R    | 175.118952         | 88.063114       | 158.092403     | 79.549839         |                |                   | 1  |

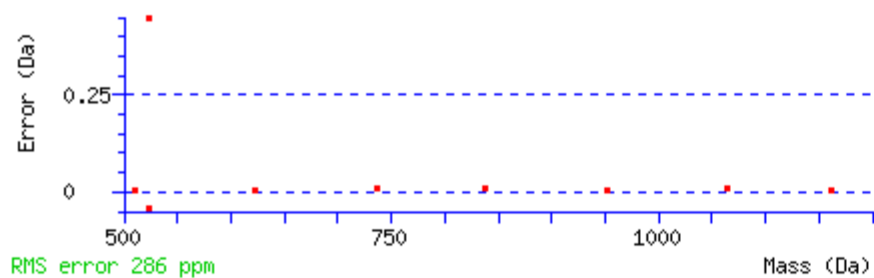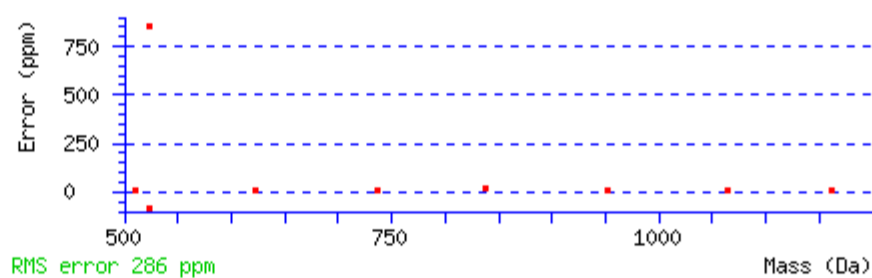

NCBI BLAST search of **EVPLNTIIFMGR**

(Parameters: blastp, nr protein database, expect=20000, no filter, PAM30)

Other BLAST [web gateways](#)

All matches to this query

| Score | Mr(calc):   | Delta     | Sequence                     |
|-------|-------------|-----------|------------------------------|
| 49.9  | 1388.748596 | 0.007992  | <a href="#">EVPLNTIIFMGR</a> |
| 2.6   | 1388.769699 | -0.013111 | <a href="#">KLQAMVIEISNK</a> |

# MASCOT SCIENCE Mascot Search Results

## Peptide View

MS/MS Fragmentation of **LVQSDHSAVQR**

Found in **AP1G2\_HUMAN**, AP-1 complex subunit gamma-like 2 OS=Homo sapiens GN=AP1G2 PE=1 SV=1

Match to Query 32805: 1238.637852 from(413.886560,3+) rtinseconds(769) index(204)

Title: Locus:1.1.1.1740.2

Data file 2011-11-10 - TFD - EP 3-2.mgf

Click mouse within plot area to zoom in by factor of two about that point

Or, Plot from  to  Da

Label all possible matches  Label matches used for scoring

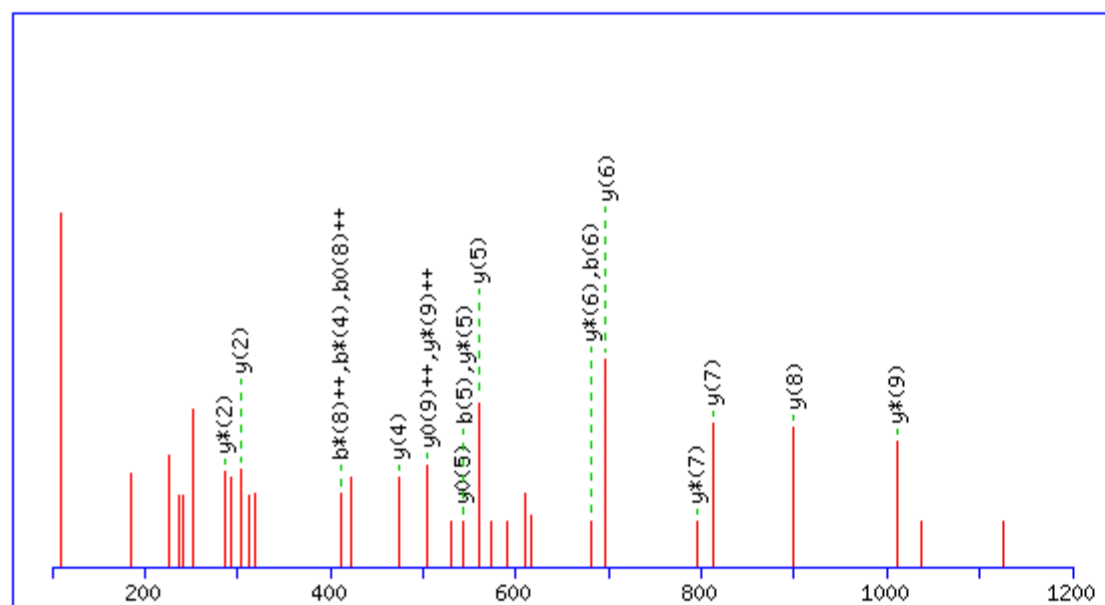

Monoisotopic mass of neutral peptide Mr(calc): 1238.636749

Fixed modifications: Propionamide (C) (apply to specified residues or termini only)

Ions Score: 32 Expect: 0.0084

Matches : 19/102 fragment ions using 27 most intense peaks [\(help\)](#)

| #  | b           | b <sup>++</sup> | b <sup>*</sup> | b <sup>*++</sup> | b <sup>0</sup> | b <sup>0++</sup> | Seq. | y           | y <sup>++</sup> | y <sup>*</sup> | y <sup>*++</sup> | y <sup>0</sup> | y <sup>0++</sup> | #  |
|----|-------------|-----------------|----------------|------------------|----------------|------------------|------|-------------|-----------------|----------------|------------------|----------------|------------------|----|
| 1  | 114.091340  | 57.549308       |                |                  |                |                  | L    |             |                 |                |                  |                |                  | 11 |
| 2  | 213.159754  | 107.083515      |                |                  |                |                  | V    | 1126.559961 | 563.783618      | 1109.533412    | 555.270344       | 1108.549396    | 554.778336       | 10 |
| 3  | 341.218332  | 171.112804      | 324.191783     | 162.599529       |                |                  | Q    | 1027.491547 | 514.249411      | 1010.464998    | 505.736137       | 1009.480982    | 505.244129       | 9  |
| 4  | 428.250360  | 214.628818      | 411.223811     | 206.115543       | 410.239795     | 205.623535       | S    | 899.432969  | 450.220122      | 882.406420     | 441.706848       | 881.422404     | 441.214840       | 8  |
| 5  | 543.277303  | 272.142290      | 526.250754     | 263.629015       | 525.266738     | 263.137007       | D    | 812.400941  | 406.704108      | 795.374392     | 398.190834       | 794.390376     | 397.698826       | 7  |
| 6  | 680.336215  | 340.671745      | 663.309666     | 332.158471       | 662.325650     | 331.666463       | H    | 697.373998  | 349.190637      | 680.347449     | 340.677362       | 679.363433     | 340.185354       | 6  |
| 7  | 767.368243  | 384.187759      | 750.341694     | 375.674485       | 749.357678     | 375.182477       | S    | 560.315086  | 280.661181      | 543.288537     | 272.147906       | 542.304521     | 271.655898       | 5  |
| 8  | 838.405357  | 419.706316      | 821.378808     | 411.193042       | 820.394792     | 410.701034       | A    | 473.283058  | 237.145167      | 456.256509     | 228.631892       |                |                  | 4  |
| 9  | 937.473771  | 469.240523      | 920.447222     | 460.727249       | 919.463206     | 460.235241       | V    | 402.245944  | 201.626610      | 385.219395     | 193.113335       |                |                  | 3  |
| 10 | 1065.532349 | 533.269812      | 1048.505800    | 524.756538       | 1047.521784    | 524.264530       | Q    | 303.177530  | 152.092403      | 286.150981     | 143.579128       |                |                  | 2  |
| 11 |             |                 |                |                  |                |                  | R    | 175.118952  | 88.063114       | 158.092403     | 79.549839        |                |                  | 1  |

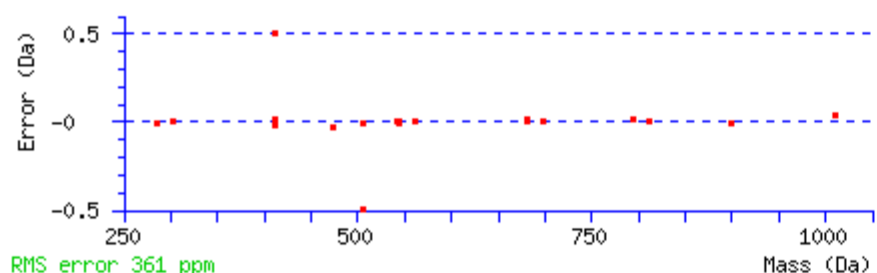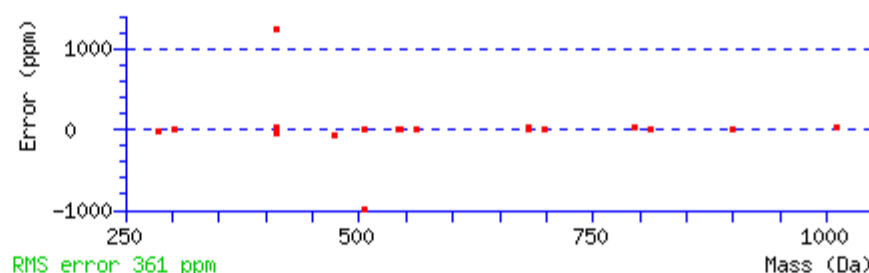

NCBI BLAST search of **LVQSDHSAVQR**

(Parameters: blastp, nr protein database, expect=20000, no filter, PAM30)

Other BLAST [web gateways](#)

All matches to this query

| Score | Mr(calc):   | Delta    | Sequence                    |
|-------|-------------|----------|-----------------------------|
| 31.6  | 1238.636749 | 0.001103 | <a href="#">LVQSDHSAVQR</a> |

Mascot: <http://www.matrixscience.com/>

# Mascot Search Results

## Peptide View

MS/MS Fragmentation of **VLSFIPPDGNFR**

Found in **AP3M1\_HUMAN**, AP-3 complex subunit mu-1 OS=Homo sapiens GN=AP3M1 PE=1 SV=1

Match to Query 39709: 1360.722588 from(681.368570,2+) rtinseconds(3105) index(43446)

Title: Locus:1.1.1.2522.27

Data file 2011-11-10 - TFD - EP 3-4.mgf

Click mouse within plot area to zoom in by factor of two about that point

Or, Plot from  to  Da

Label all possible matches  Label matches used for scoring

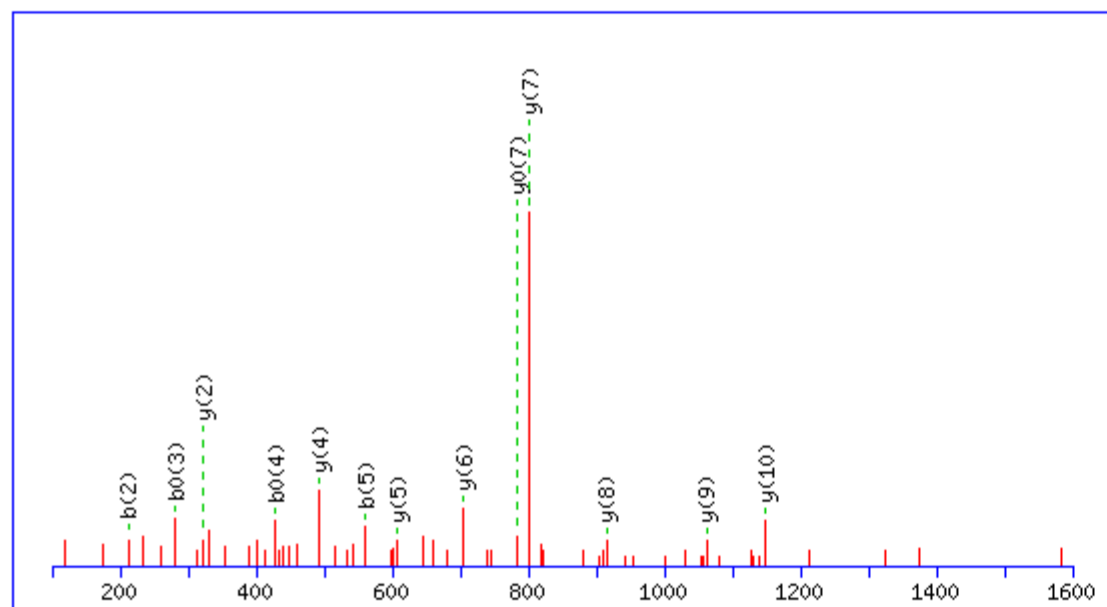

Monoisotopic mass of neutral peptide Mr(calc): 1360.713943

Fixed modifications: Propionamide (C) (apply to specified residues or termini only)

Ions Score: 56 Expect: 9.8e-006

Matches : 13/102 fragment ions using 23 most intense peaks [\(help\)](#)

| #  | b                 | b <sup>++</sup> | b <sup>*</sup> | b <sup>+++</sup> | b <sup>0</sup>    | b <sup>0++</sup> | Seq. | y                  | y <sup>++</sup> | y <sup>*</sup> | y <sup>+++</sup> | y <sup>0</sup>    | y <sup>0++</sup> | #  |
|----|-------------------|-----------------|----------------|------------------|-------------------|------------------|------|--------------------|-----------------|----------------|------------------|-------------------|------------------|----|
| 1  | 100.075690        | 50.541483       |                |                  |                   |                  | V    |                    |                 |                |                  |                   |                  | 12 |
| 2  | <b>213.159754</b> | 107.083515      |                |                  |                   |                  | L    | 1262.652798        | 631.830037      | 1245.626249    | 623.316763       | 1244.642233       | 622.824755       | 11 |
| 3  | 300.191782        | 150.599529      |                |                  | <b>282.181217</b> | 141.594247       | S    | <b>1149.568734</b> | 575.288005      | 1132.542185    | 566.774731       | 1131.558169       | 566.282723       | 10 |
| 4  | 447.260196        | 224.133736      |                |                  | <b>429.249631</b> | 215.128454       | F    | <b>1062.536706</b> | 531.771991      | 1045.510157    | 523.258717       | 1044.526141       | 522.766709       | 9  |
| 5  | <b>560.344260</b> | 280.675768      |                |                  | 542.333695        | 271.670486       | I    | <b>915.468292</b>  | 458.237784      | 898.441743     | 449.724510       | 897.457727        | 449.232502       | 8  |
| 6  | 657.397024        | 329.202150      |                |                  | 639.386459        | 320.196868       | P    | <b>802.384228</b>  | 401.695752      | 785.357679     | 393.182478       | <b>784.373663</b> | 392.690470       | 7  |
| 7  | 754.449788        | 377.728532      |                |                  | 736.439223        | 368.723250       | P    | <b>705.331464</b>  | 353.169370      | 688.304915     | 344.656096       | 687.320899        | 344.164088       | 6  |
| 8  | 869.476731        | 435.242004      |                |                  | 851.466166        | 426.236721       | D    | <b>608.278700</b>  | 304.642988      | 591.252151     | 296.129714       | 590.268135        | 295.637706       | 5  |
| 9  | 926.498195        | 463.752736      |                |                  | 908.487630        | 454.747453       | G    | <b>493.251757</b>  | 247.129516      | 476.225208     | 238.616242       |                   |                  | 4  |
| 10 | 1040.541122       | 520.774199      | 1023.514573    | 512.260924       | 1022.530557       | 511.768917       | N    | 436.230293         | 218.618784      | 419.203744     | 210.105510       |                   |                  | 3  |
| 11 | 1187.609536       | 594.308406      | 1170.582987    | 585.795132       | 1169.598971       | 585.303124       | F    | <b>322.187366</b>  | 161.597321      | 305.160817     | 153.084047       |                   |                  | 2  |
| 12 |                   |                 |                |                  |                   |                  | R    | 175.118952         | 88.063114       | 158.092403     | 79.549839        |                   |                  | 1  |

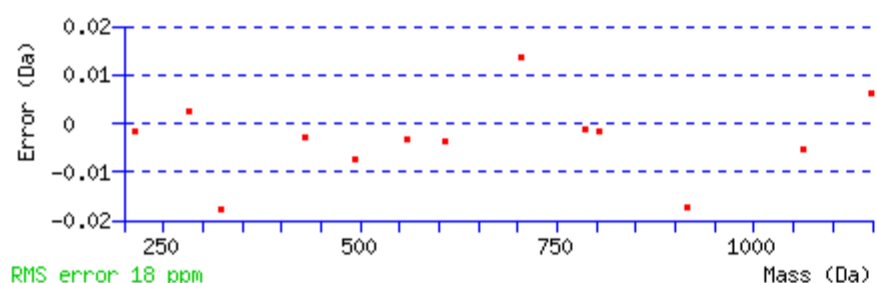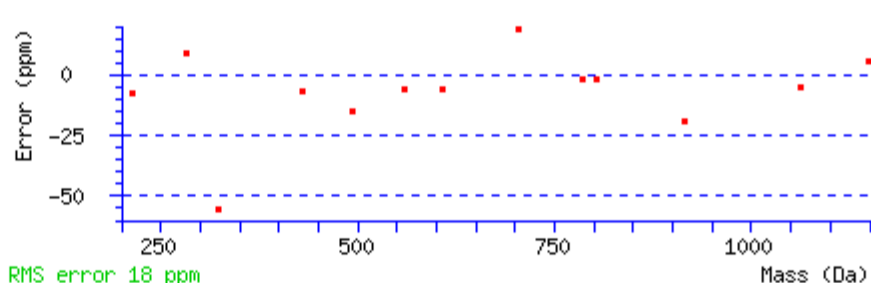

NCBI BLAST search of **VLSFIPPDGNFR**

(Parameters: blastp, nr protein database, expect=20000, no filter, PAM30)

Other BLAST [web gateways](#)

All matches to this query

| Score | Mr(calc):   | Delta    | Sequence                     |
|-------|-------------|----------|------------------------------|
| 56.4  | 1360.713943 | 0.008645 | <a href="#">VLSFIPPDGNFR</a> |

Mascot: <http://www.matrixscience.com/>

# MASCOT SEARCH RESULTS

## Peptide View

MS/MS Fragmentation of **ILAPLLLDK**

Found in **AP4S1\_HUMAN**, AP-4 complex subunit sigma-1 OS=Homo sapiens GN=AP4S1 PE=2 SV=1

Match to Query 22303: 1107.727648 from(554.871100,2+) rtinseconds(3790) index(41143)

Title: Locus:1.1.1.2773.6

Data file 2011-11-12 - TFD - EP 6-7.mgf

Click mouse within plot area to zoom in by factor of two about that point

Or, Plot from  to  Da

Label all possible matches  Label matches used for scoring

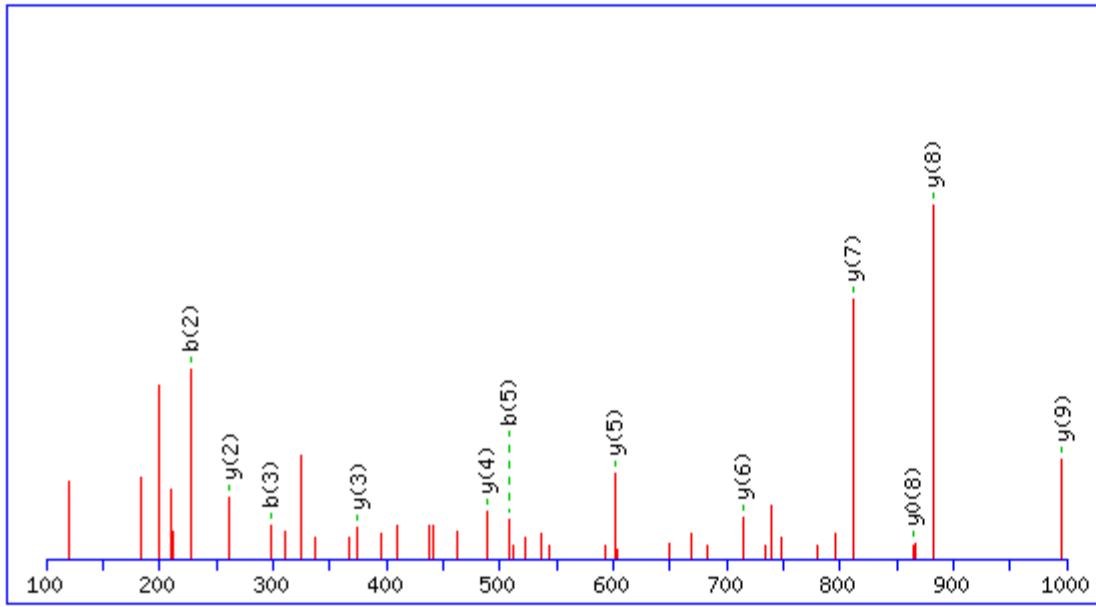

Monoisotopic mass of neutral peptide Mr(calc): 1107.726700

Fixed modifications: Propionamide (C) (apply to specified residues or termini only)

Ions Score: 57 Expect: 1.8e-006

Matches : 12/72 fragment ions using 25 most intense peaks [\(help\)](#)

| #  | b                 | b <sup>++</sup> | b <sup>0</sup> | b <sup>0++</sup> | Seq. | y                 | y <sup>++</sup> | y <sup>*</sup> | y <sup>*++</sup> | y <sup>0</sup>    | y <sup>0++</sup> | #  |
|----|-------------------|-----------------|----------------|------------------|------|-------------------|-----------------|----------------|------------------|-------------------|------------------|----|
| 1  | 114.091340        | 57.549308       |                |                  | I    |                   |                 |                |                  |                   |                  | 10 |
| 2  | <b>227.175404</b> | 114.091340      |                |                  | L    | <b>995.649945</b> | 498.328611      | 978.623396     | 489.815336       | 977.639380        | 489.323328       | 9  |
| 3  | <b>298.212518</b> | 149.609897      |                |                  | A    | <b>882.565881</b> | 441.786579      | 865.539332     | 433.273304       | <b>864.555316</b> | 432.781296       | 8  |
| 4  | 395.265282        | 198.136279      |                |                  | P    | <b>811.528767</b> | 406.268022      | 794.502218     | 397.754747       | 793.518202        | 397.262739       | 7  |
| 5  | <b>508.349346</b> | 254.678311      |                |                  | L    | <b>714.476003</b> | 357.741640      | 697.449454     | 349.228365       | 696.465438        | 348.736357       | 6  |
| 6  | 621.433410        | 311.220343      |                |                  | L    | <b>601.391939</b> | 301.199608      | 584.365390     | 292.686333       | 583.381374        | 292.194325       | 5  |
| 7  | 734.517474        | 367.762375      |                |                  | I    | <b>488.307875</b> | 244.657575      | 471.281326     | 236.144301       | 470.297310        | 235.652293       | 4  |
| 8  | 847.601538        | 424.304407      |                |                  | L    | <b>375.223811</b> | 188.115543      | 358.197262     | 179.602269       | 357.213246        | 179.110261       | 3  |
| 9  | 962.628481        | 481.817879      | 944.617916     | 472.812596       | D    | <b>262.139747</b> | 131.573511      | 245.113198     | 123.060237       | 244.129182        | 122.568229       | 2  |
| 10 |                   |                 |                |                  | K    | 147.112804        | 74.060040       | 130.086255     | 65.546765        |                   |                  | 1  |

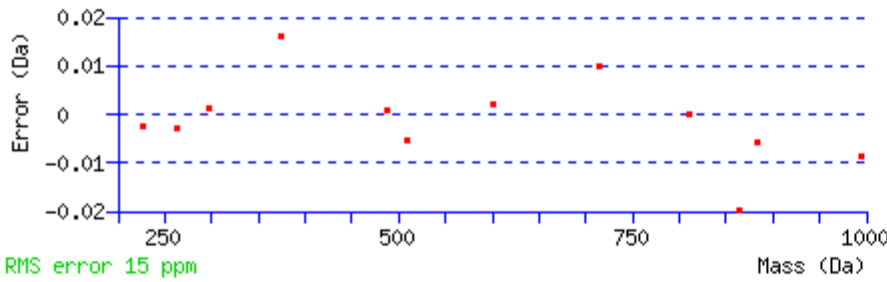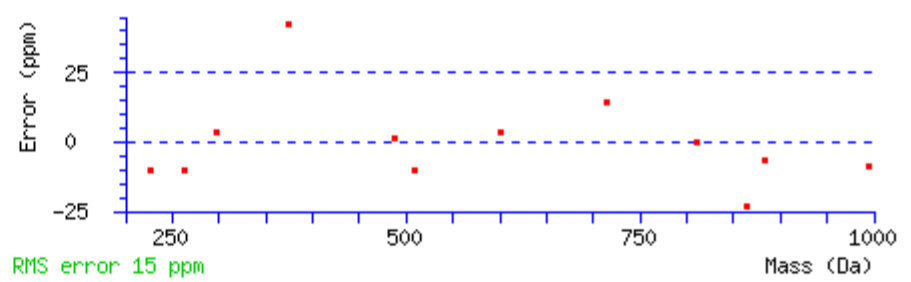

NCBI BLAST search of [ILAPLLLDK](#)

(Parameters: blastp, nr protein database, expect=20000, no filter, PAM30)

Other BLAST [web gateways](#)

All matches to this query

| Score | Mr(calc):   | Delta     | Sequence                   |
|-------|-------------|-----------|----------------------------|
| 57.4  | 1107.726700 | 0.000948  | <a href="#">ILAPLLLDK</a>  |
| 0.4   | 1107.737946 | -0.010298 | <a href="#">LLVPQVAIKK</a> |

Mascot: <http://www.matrixscience.com/>

# **MASCOT** Mascot Search Results

## Peptide View

MS/MS Fragmentation of **SPELQAEAK**

Found in **APOA2\_HUMAN**, Apolipoprotein A-II OS=Homo sapiens GN=APOA2 PE=1 SV=1

Match to Query 222039: 971.493468 from(486.754010,2+) rtinseconds(1042) index(244557)

Title: Locus:1.1.1.838.10

Data file C:\Program Files (x86)\Matrix Science\Mascot Daemon\mgf3 TFD - Epitel - R2\mascot\_daemon\_merge.mgf

Click mouse within plot area to zoom in by factor of two about that point

Or, Plot from  to  Da

Label all possible matches  Label matches used for scoring

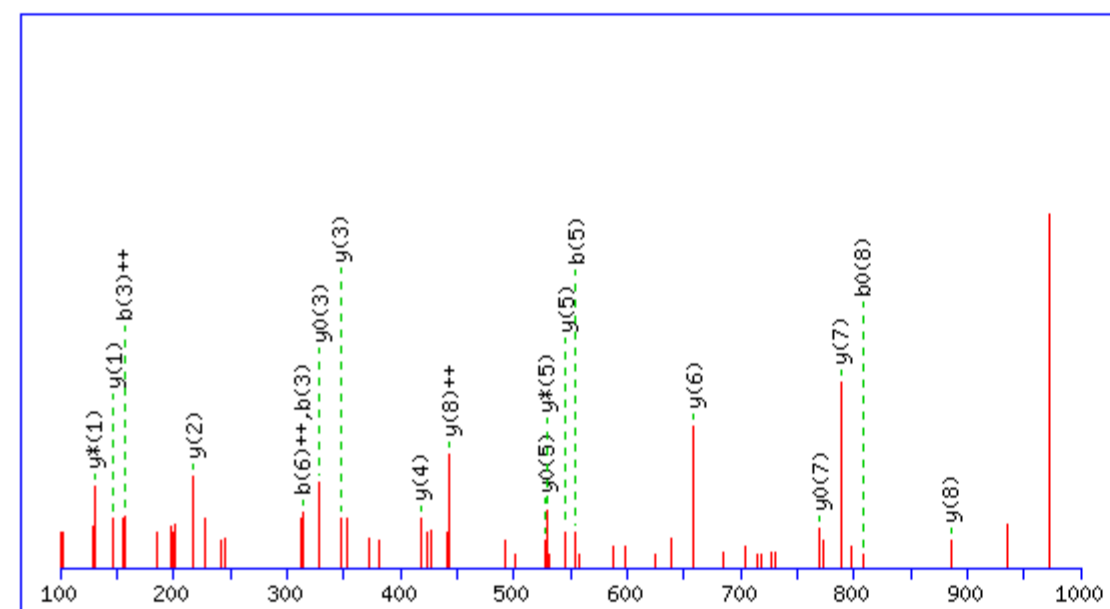

Monoisotopic mass of neutral peptide Mr(calc): 971.492340

Fixed modifications: Carbamidomethyl (C) (apply to specified residues or termini only)

Ions Score: 60 Expect: 9.5e-006

Matches : 19/84 fragment ions using 31 most intense peaks [\(help\)](#)

| # | b          | b <sup>++</sup> | b <sup>*</sup> | b <sup>*++</sup> | b <sup>0</sup> | b <sup>0++</sup> | Seq. | y          | y <sup>++</sup> | y <sup>*</sup> | y <sup>*++</sup> | y <sup>0</sup> | y <sup>0++</sup> | # |
|---|------------|-----------------|----------------|------------------|----------------|------------------|------|------------|-----------------|----------------|------------------|----------------|------------------|---|
| 1 | 88.039304  | 44.523290       |                |                  | 70.028739      | 35.518008        | S    |            |                 |                |                  |                |                  | 9 |
| 2 | 185.092068 | 93.049672       |                |                  | 167.081503     | 84.044389        | P    | 885.467624 | 443.237450      | 868.441075     | 434.724176       | 867.457059     | 434.232168       | 8 |
| 3 | 314.134661 | 157.570968      |                |                  | 296.124096     | 148.565686       | E    | 788.414860 | 394.711068      | 771.388311     | 386.197794       | 770.404295     | 385.705786       | 7 |
| 4 | 427.218725 | 214.113001      |                |                  | 409.208160     | 205.107718       | L    | 659.372267 | 330.189772      | 642.345718     | 321.676497       | 641.361702     | 321.184489       | 6 |
| 5 | 555.277303 | 278.142290      | 538.250754     | 269.629015       | 537.266738     | 269.137007       | Q    | 546.288203 | 273.647740      | 529.261654     | 265.134465       | 528.277638     | 264.642457       | 5 |
| 6 | 626.314417 | 313.660847      | 609.287868     | 305.147572       | 608.303852     | 304.655564       | A    | 418.229625 | 209.618450      | 401.203076     | 201.105176       | 400.219060     | 200.613168       | 4 |
| 7 | 755.357010 | 378.182143      | 738.330461     | 369.668869       | 737.346445     | 369.176861       | E    | 347.192511 | 174.099893      | 330.165962     | 165.586619       | 329.181946     | 165.094611       | 3 |
| 8 | 826.394124 | 413.700700      | 809.367575     | 405.187426       | 808.383559     | 404.695418       | A    | 218.149918 | 109.578597      | 201.123369     | 101.065322       |                |                  | 2 |
| 9 |            |                 |                |                  |                |                  | K    | 147.112804 | 74.060040       | 130.086255     | 65.546765        |                |                  | 1 |

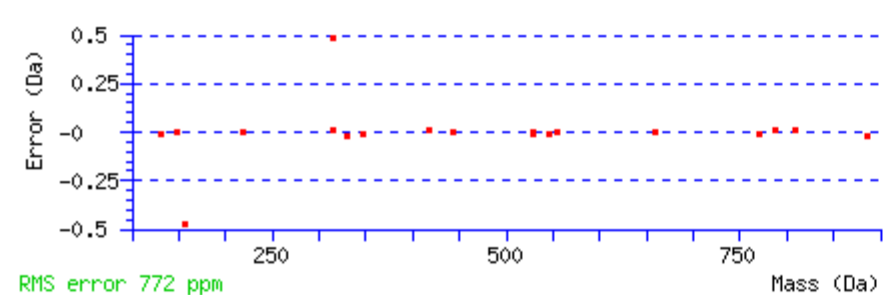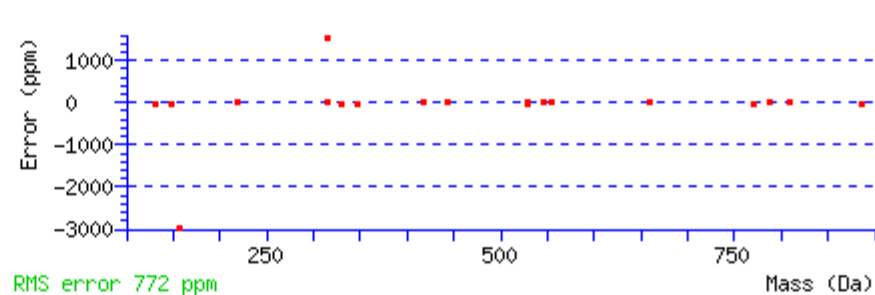

NCBI BLAST search of [SPELQAEAK](#)

(Parameters: blastp, nr protein database, expect=20000, no filter, PAM30)

Other BLAST [web gateways](#)

## All matches to this query

| Score | Mr(calc):  | Delta    | Sequence                   |
|-------|------------|----------|----------------------------|
| 59.6  | 971.492340 | 0.001128 | <a href="#">SPELQAEAK</a>  |
| 10.6  | 971.492371 | 0.001097 | <a href="#">SPEAATPVGK</a> |
| 9.3   | 971.492371 | 0.001097 | <a href="#">VNDPETA VK</a> |
| 8.2   | 971.492371 | 0.001097 | <a href="#">SPDSPKTPK</a>  |
| 7.6   | 971.492355 | 0.001113 | <a href="#">APEINISVN</a>  |
| 5.1   | 971.492371 | 0.001097 | <a href="#">SPDSPKTPK</a>  |
| 4.3   | 971.492371 | 0.001097 | <a href="#">EKPTGPPAK</a>  |
| 4.1   | 971.489853 | 0.003615 | <a href="#">LAEHMF PK</a>  |
| 3.1   | 971.492355 | 0.001113 | <a href="#">SPSPAPEKK</a>  |
| 1.7   | 971.492386 | 0.001082 | <a href="#">DVPVPTNAK</a>  |

Mascot: <http://www.matrixscience.com/>

# MASCOT SEARCH RESULTS

## Peptide View

MS/MS Fragmentation of **IAAVDTDSPR**

Found in **BAX\_HUMAN**, Apoptosis regulator BAX OS=Homo sapiens GN=BAX PE=1 SV=1

Match to Query 11582: 1043.528808 from(522.771680,2+) rtinseconds(1066) index(4976)

Title: Locus:1.1.1.789.17

Data file 2012-01-27 - TFD - Epitel - IEC - 10ul - 2.mgf

Click mouse within plot area to zoom in by factor of two about that point

Or, Plot from  to  Da

Label all possible matches  Label matches used for scoring

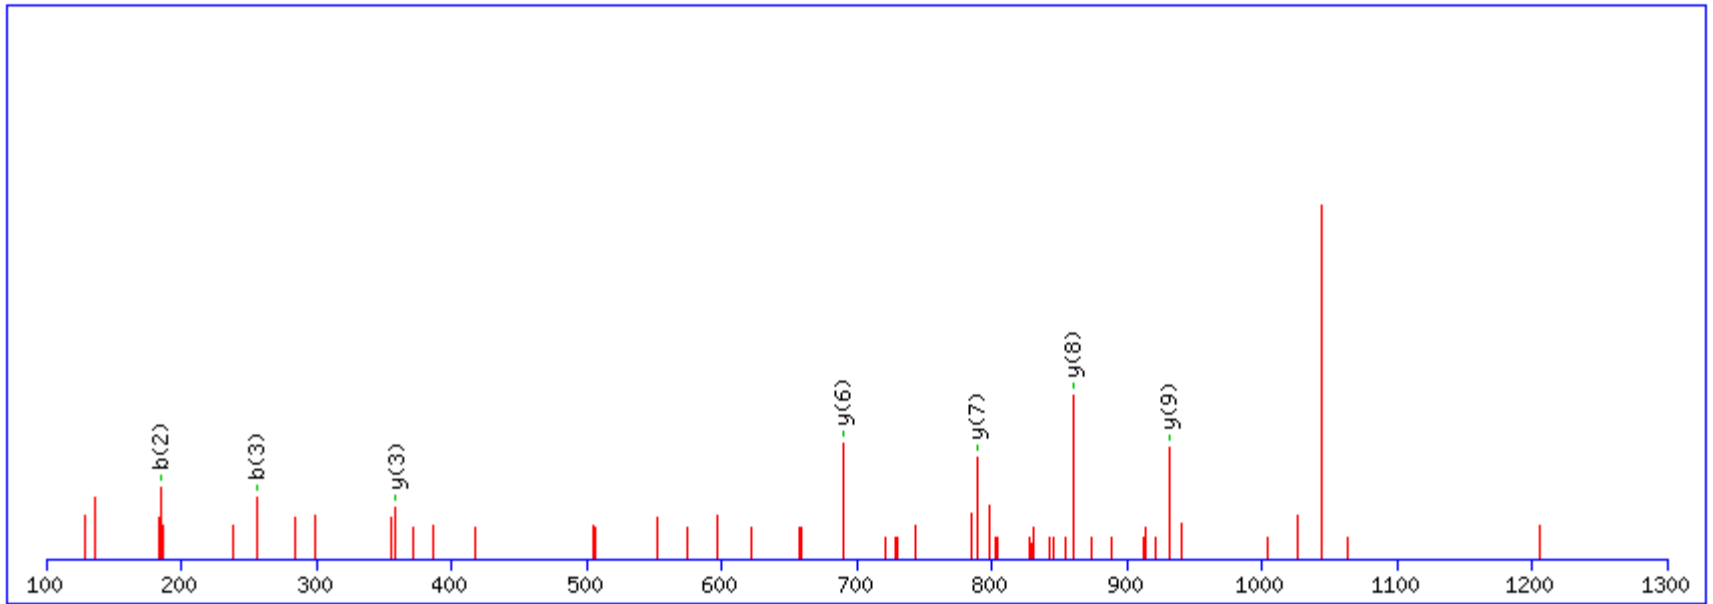

Monoisotopic mass of neutral peptide Mr(calc): 1043.524734

Fixed modifications: Carbamidomethyl (C) (apply to specified residues or termini only)

Ions Score: 44 Expect: 0.00029

Matches : 7/78 fragment ions using 9 most intense peaks [\(help\)](#)

| #  | b                 | b <sup>++</sup> | b <sup>0</sup> | b <sup>0++</sup> | Seq. | y                 | y <sup>++</sup> | y <sup>*</sup> | y <sup>*++</sup> | y <sup>0</sup> | y <sup>0++</sup> | #  |
|----|-------------------|-----------------|----------------|------------------|------|-------------------|-----------------|----------------|------------------|----------------|------------------|----|
| 1  | 114.091340        | 57.549308       |                |                  | I    |                   |                 |                |                  |                |                  | 10 |
| 2  | <b>185.128454</b> | 93.067865       |                |                  | A    | <b>931.447951</b> | 466.227614      | 914.421402     | 457.714339       | 913.437386     | 457.222331       | 9  |
| 3  | <b>256.165568</b> | 128.586422      |                |                  | A    | <b>860.410837</b> | 430.709057      | 843.384288     | 422.195782       | 842.400272     | 421.703774       | 8  |
| 4  | 355.233982        | 178.120629      |                |                  | V    | <b>789.373723</b> | 395.190500      | 772.347174     | 386.677225       | 771.363158     | 386.185217       | 7  |
| 5  | 470.260925        | 235.634100      | 452.250360     | 226.628818       | D    | <b>690.305309</b> | 345.656293      | 673.278760     | 337.143018       | 672.294744     | 336.651010       | 6  |
| 6  | 571.308604        | 286.157940      | 553.298039     | 277.152658       | T    | 575.278366        | 288.142821      | 558.251817     | 279.629547       | 557.267801     | 279.137539       | 5  |
| 7  | 686.335547        | 343.671412      | 668.324982     | 334.666129       | D    | 474.230687        | 237.618981      | 457.204138     | 229.105707       | 456.220122     | 228.613699       | 4  |
| 8  | 773.367575        | 387.187426      | 755.357010     | 378.182143       | S    | <b>359.203744</b> | 180.105510      | 342.177195     | 171.592235       | 341.193179     | 171.100227       | 3  |
| 9  | 870.420339        | 435.713808      | 852.409774     | 426.708525       | P    | 272.171716        | 136.589496      | 255.145167     | 128.076221       |                |                  | 2  |
| 10 |                   |                 |                |                  | R    | 175.118952        | 88.063114       | 158.092403     | 79.549839        |                |                  | 1  |

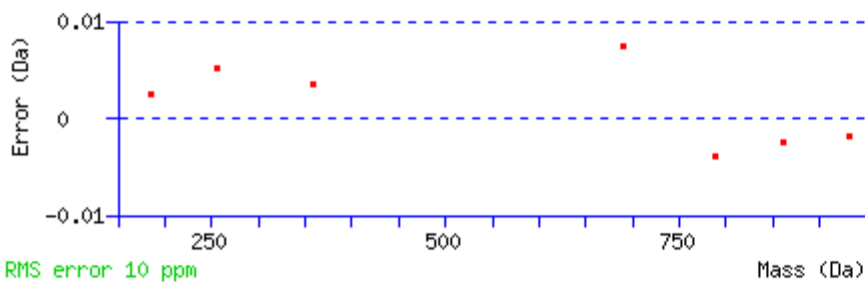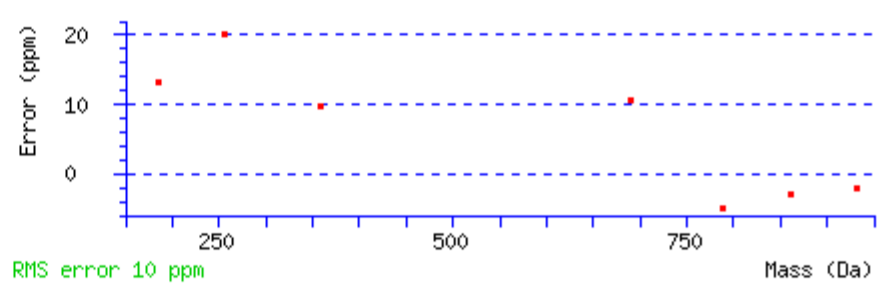

NCBI BLAST search of [IAAVDTDSPR](#)

(Parameters: blastp, nr protein database, expect=20000, no filter, PAM30)

Other BLAST [web gateways](#)

## All matches to this query

| Score | Mr(calc):   | Delta     | Sequence                   |
|-------|-------------|-----------|----------------------------|
| 43.8  | 1043.524734 | 0.004074  | <a href="#">IAAVDTDSPR</a> |
| 6.0   | 1043.535965 | -0.007157 | <a href="#">SPARTQSPGK</a> |

# MASCOT SCIENCE Mascot Search Results

## Peptide View

MS/MS Fragmentation of **GFNSGYAVNPAR**

Found in **AQP3\_HUMAN**, Aquaporin-3 OS=Homo sapiens GN=AQP3 PE=2 SV=2

Match to Query 583083: 1251.597208 from(626.805880,2+) rtinseconds(1795) index(508024)

Title: Locus:1.1.1.1014.37

Data file C:\Program Files (x86)\Matrix Science\Mascot Daemon\mgf3 TFD - Epitel - R2\mascot\_daemon\_merge.mgf

Click mouse within plot area to zoom in by factor of two about that point

Or, Plot from  to  Da

Label all possible matches  Label matches used for scoring

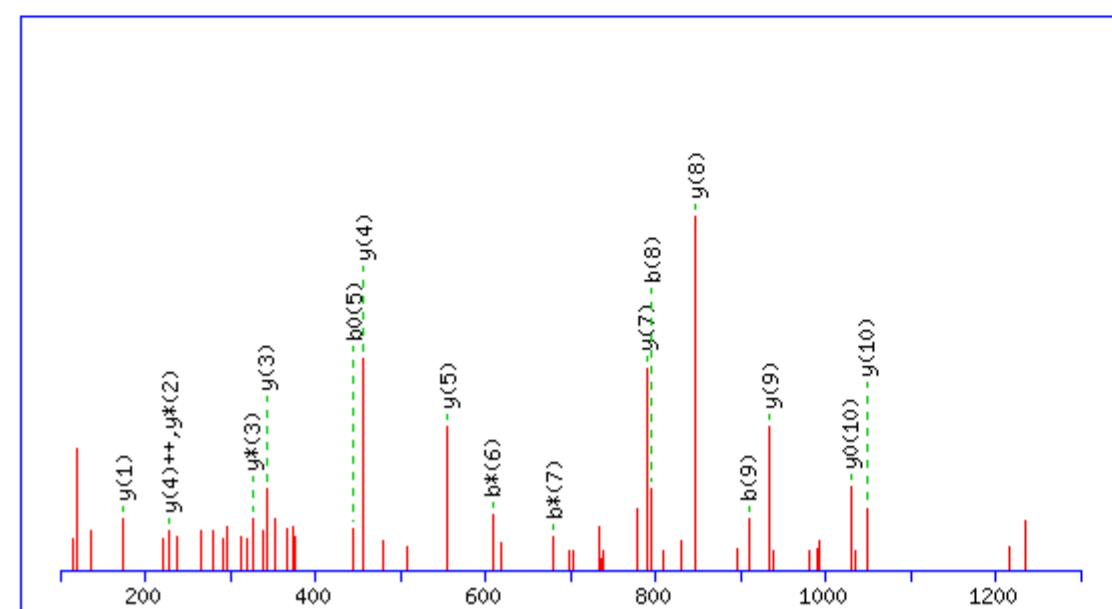

Monoisotopic mass of neutral peptide Mr(calcd): 1251.599625

Fixed modifications: Carbamidomethyl (C) (apply to specified residues or termini only)

Ions Score: 72 Expect: 7.3e-007

Matches : 17/106 fragment ions using 22 most intense peaks [\(help\)](#)

| #  | b                 | b <sup>++</sup> | b <sup>*</sup>    | b <sup>*++</sup> | b <sup>0</sup>    | b <sup>0++</sup> | Seq. | y                  | y <sup>++</sup>   | y <sup>*</sup>    | y <sup>*++</sup> | y <sup>0</sup>     | y <sup>0++</sup> | #  |
|----|-------------------|-----------------|-------------------|------------------|-------------------|------------------|------|--------------------|-------------------|-------------------|------------------|--------------------|------------------|----|
| 1  | 58.028740         | 29.518008       |                   |                  |                   |                  | G    |                    |                   |                   |                  |                    |                  | 12 |
| 2  | 205.097154        | 103.052215      |                   |                  |                   |                  | F    | 1195.585447        | 598.296362        | 1178.558898       | 589.783087       | 1177.574882        | 589.291079       | 11 |
| 3  | 319.140081        | 160.073679      | 302.113532        | 151.560404       |                   |                  | N    | <b>1048.517033</b> | 524.762155        | 1031.490484       | 516.248880       | <b>1030.506468</b> | 515.756872       | 10 |
| 4  | 406.172109        | 203.589693      | 389.145560        | 195.076418       | 388.161544        | 194.584410       | S    | <b>934.474106</b>  | 467.740691        | 917.447557        | 459.227417       | 916.463541         | 458.735409       | 9  |
| 5  | 463.193573        | 232.100425      | 446.167024        | 223.587150       | <b>445.183008</b> | 223.095142       | G    | <b>847.442078</b>  | 424.224677        | 830.415529        | 415.711403       |                    |                  | 8  |
| 6  | 626.256902        | 313.632089      | <b>609.230353</b> | 305.118815       | 608.246337        | 304.626807       | Y    | <b>790.420614</b>  | 395.713945        | 773.394065        | 387.200671       |                    |                  | 7  |
| 7  | 697.294016        | 349.150646      | <b>680.267467</b> | 340.637372       | 679.283451        | 340.145364       | A    | 627.357285         | 314.182281        | 610.330736        | 305.669006       |                    |                  | 6  |
| 8  | <b>796.362430</b> | 398.684853      | 779.335881        | 390.171579       | 778.351865        | 389.679571       | V    | <b>556.320171</b>  | 278.663724        | 539.293622        | 270.150449       |                    |                  | 5  |
| 9  | <b>910.405357</b> | 455.706317      | 893.378808        | 447.193042       | 892.394792        | 446.701034       | N    | <b>457.251757</b>  | <b>229.129516</b> | 440.225208        | 220.616242       |                    |                  | 4  |
| 10 | 1007.458121       | 504.232699      | 990.431572        | 495.719424       | 989.447556        | 495.227416       | P    | <b>343.208830</b>  | 172.108053        | <b>326.182281</b> | 163.594779       |                    |                  | 3  |
| 11 | 1078.495235       | 539.751256      | 1061.468686       | 531.237981       | 1060.484670       | 530.745973       | A    | 246.156066         | 123.581671        | <b>229.129517</b> | 115.068397       |                    |                  | 2  |
| 12 |                   |                 |                   |                  |                   |                  | R    | <b>175.118952</b>  | 88.063114         | 158.092403        | 79.549839        |                    |                  | 1  |

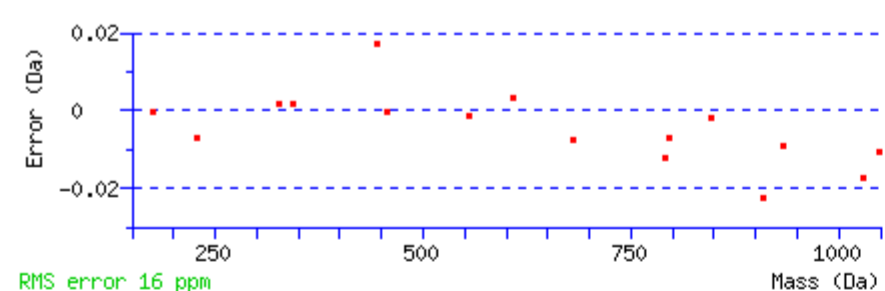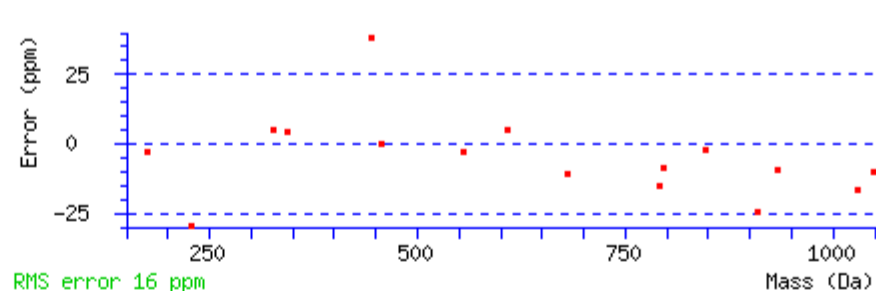

NCBI BLAST search of [GFNSGYAVNPAR](#)

(Parameters: blastp, nr protein database, expect=20000, no filter, PAM30)

Other BLAST [web gateways](#)

## All matches to this query

| Score | Mr(calcd):  | Delta     | Sequence                     |
|-------|-------------|-----------|------------------------------|
| 71.8  | 1251.599625 | -0.002417 | <a href="#">GFNSGYAVNPAR</a> |
| 9.1   | 1251.603012 | -0.005804 | <a href="#">TPKNGPPPCPR</a>  |
| 8.9   | 1251.603012 | -0.005804 | <a href="#">TPKNGPPPCPR</a>  |
| 6.4   | 1251.603012 | -0.005804 | <a href="#">TPKNGPPPCPR</a>  |
| 6.4   | 1251.603012 | -0.005804 | <a href="#">TPKNGPPPCPR</a>  |
| 5.7   | 1251.602982 | -0.005774 | <a href="#">NEGMVLEHPAR</a>  |

# MASCOT SCIENCE Mascot Search Results

## Peptide View

MS/MS Fragmentation of **IESLITK**

Found in **ARAP2\_HUMAN**, Arf-GAP with Rho-GAP domain, ANK repeat and PH domain-containing protein 2 OS=Homo sapiens  
GN=ARAP2 PE=1 SV=3

Match to Query 414: 802.485508 from(402.250030,2+) rtinseconds(1562) index(14408)

Title: Locus:1.1.1.1962.3

Data file 2011-11-12 - TFD - EP 6-3.mgf

Click mouse within plot area to zoom in by factor of two about that point

Or, Plot from  to  Da

Label all possible matches  Label matches used for scoring

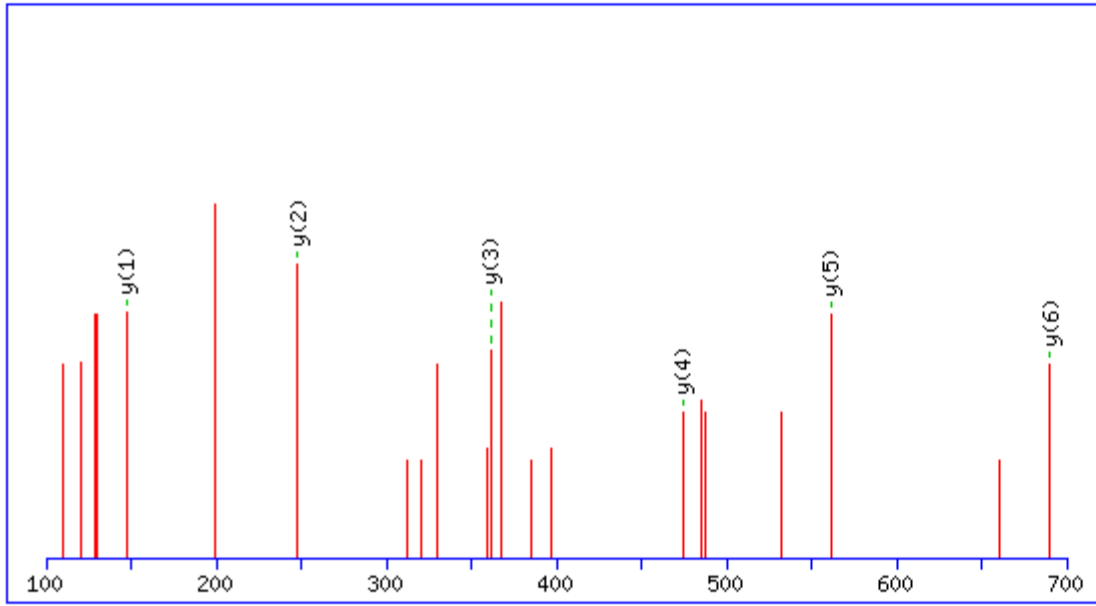

Monoisotopic mass of neutral peptide Mr(calc): 802.479996

Fixed modifications: Propionamide (C) (apply to specified residues or termini only)

Ions Score: 45 Expect: 0.00019

Matches : 6/56 fragment ions using 11 most intense peaks [\(help\)](#)

| # | b          | b <sup>++</sup> | b <sup>0</sup> | b <sup>0++</sup> | Seq. | y                 | y <sup>++</sup> | y <sup>*</sup> | y <sup>+++</sup> | y <sup>0</sup> | y <sup>0++</sup> | # |
|---|------------|-----------------|----------------|------------------|------|-------------------|-----------------|----------------|------------------|----------------|------------------|---|
| 1 | 114.091340 | 57.549308       |                |                  | I    |                   |                 |                |                  |                |                  | 7 |
| 2 | 243.133933 | 122.070605      | 225.123368     | 113.065322       | E    | <b>690.403232</b> | 345.705254      | 673.376683     | 337.191980       | 672.392667     | 336.699972       | 6 |
| 3 | 330.165961 | 165.586618      | 312.155396     | 156.581336       | S    | <b>561.360639</b> | 281.183958      | 544.334090     | 272.670683       | 543.350074     | 272.178675       | 5 |
| 4 | 443.250025 | 222.128650      | 425.239460     | 213.123368       | L    | <b>474.328611</b> | 237.667944      | 457.302062     | 229.154669       | 456.318046     | 228.662661       | 4 |
| 5 | 556.334089 | 278.670683      | 538.323524     | 269.665400       | I    | <b>361.244547</b> | 181.125912      | 344.217998     | 172.612637       | 343.233982     | 172.120629       | 3 |
| 6 | 657.381768 | 329.194522      | 639.371203     | 320.189240       | T    | <b>248.160483</b> | 124.583879      | 231.133934     | 116.070605       | 230.149918     | 115.578597       | 2 |
| 7 |            |                 |                |                  | K    | <b>147.112804</b> | 74.060040       | 130.086255     | 65.546765        |                |                  | 1 |

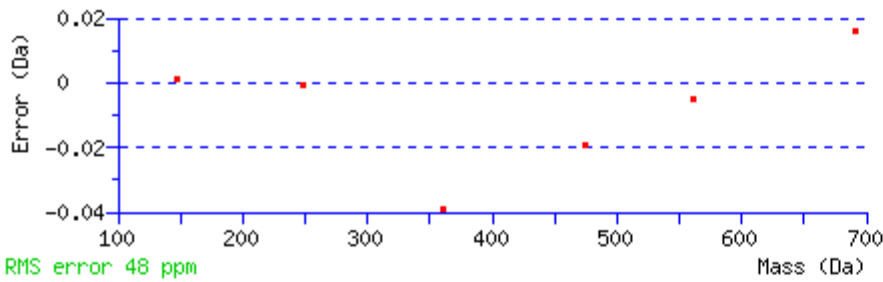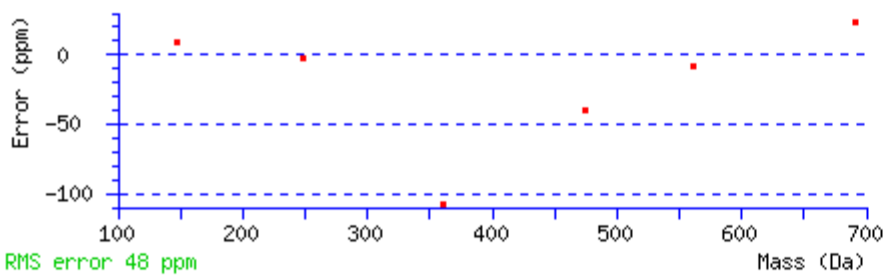

NCBI BLAST search of [IESLITK](#)

(Parameters: blastp, nr protein database, expect=20000, no filter, PAM30)

Other BLAST [web gateways](#)

## All matches to this query

| Score | Mr(calc):  | Delta     | Sequence                 |
|-------|------------|-----------|--------------------------|
| 45.1  | 802.479996 | 0.005512  | <a href="#">IESLITK</a>  |
| 10.9  | 802.491226 | -0.005718 | <a href="#">SNKLTLK</a>  |
| 9.5   | 802.479996 | 0.005512  | <a href="#">ELSTLLK</a>  |
| 7.1   | 802.480011 | 0.005497  | <a href="#">ITVLETK</a>  |
| 7.1   | 802.480011 | 0.005497  | <a href="#">IVTLETK</a>  |
| 7.1   | 802.480011 | 0.005497  | <a href="#">LVTLETK</a>  |
| 6.9   | 802.492569 | -0.007061 | <a href="#">IHRHLK</a>   |
| 6.7   | 802.480011 | 0.005497  | <a href="#">TLEVLTK</a>  |
| 5.9   | 802.491226 | -0.005718 | <a href="#">ISALKGSK</a> |
| 5.0   | 802.491226 | -0.005718 | <a href="#">ALSSKGLK</a> |



# MASCOT SEARCH RESULTS

## Peptide View

MS/MS Fragmentation of **LNSNDEDIHTANER**

Found in **ARLY\_HUMAN**, Argininosuccinate lyase OS=Homo sapiens GN=ASL PE=1 SV=4

Match to Query 925105: 1626.724302 from(543.248710,3+) rtinseconds(1063) index(412795)

Title: Locus:1.1.1.740.39

Data file C:\Program Files (x86)\Matrix Science\Mascot Daemon\mgf3 TFD - Epitel - R2\mascot\_daemon\_merge.mgf

Click mouse within plot area to zoom in by factor of two about that point

Or, Plot from  to  Da

Label all possible matches  Label matches used for scoring

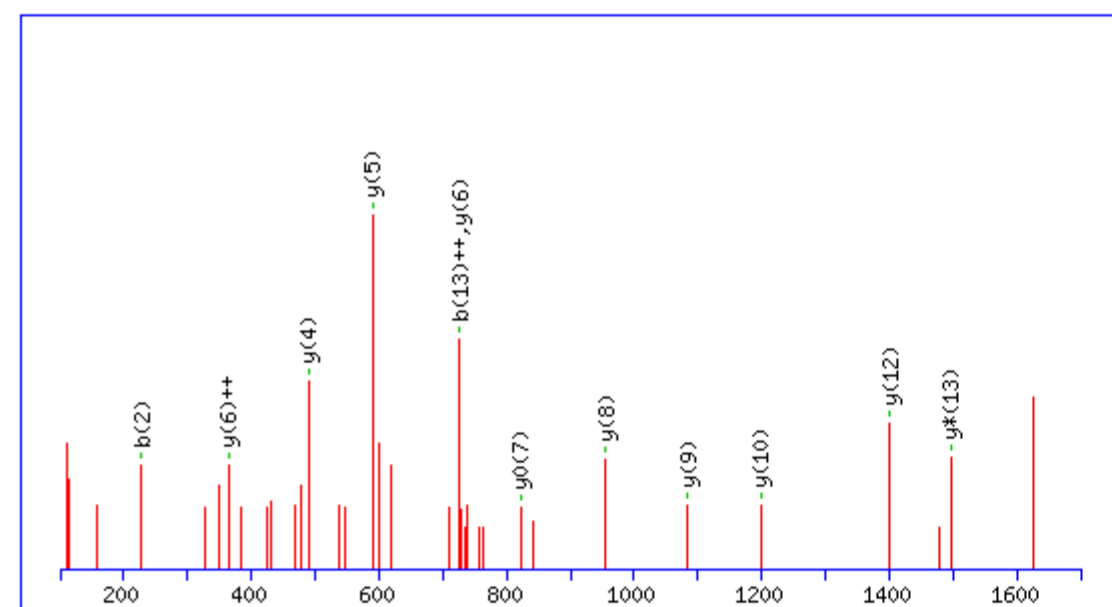

Monoisotopic mass of neutral peptide Mr(calc): 1626.723358

Fixed modifications: Carbamidomethyl (C) (apply to specified residues or termini only)

Ions Score: 52 Expect: 4.2e-005

Matches: 12/148 fragment ions using 13 most intense peaks [\(help\)](#)

| #  | b                 | b <sup>++</sup>   | b <sup>*</sup> | b <sup>++</sup> | b <sup>0</sup> | b <sup>0++</sup> | Seq. | y                  | y <sup>++</sup>   | y <sup>*</sup>     | y <sup>++</sup> | y <sup>0</sup>    | y <sup>0++</sup> | #  |
|----|-------------------|-------------------|----------------|-----------------|----------------|------------------|------|--------------------|-------------------|--------------------|-----------------|-------------------|------------------|----|
| 1  | 114.091340        | 57.549308         |                |                 |                |                  | L    |                    |                   |                    |                 |                   |                  | 14 |
| 2  | <b>228.134267</b> | 114.570771        | 211.107718     | 106.057497      |                |                  | N    | 1514.646602        | 757.826939        | <b>1497.620053</b> | 749.313665      | 1496.636037       | 748.821657       | 13 |
| 3  | 315.166295        | 158.086785        | 298.139746     | 149.573511      | 297.155730     | 149.081503       | S    | <b>1400.603675</b> | 700.805476        | 1383.577126        | 692.292201      | 1382.593110       | 691.800193       | 12 |
| 4  | 429.209222        | 215.108249        | 412.182673     | 206.594975      | 411.198657     | 206.102967       | N    | 1313.571647        | 657.289462        | 1296.545098        | 648.776187      | 1295.561082       | 648.284179       | 11 |
| 5  | 544.236165        | 272.621721        | 527.209616     | 264.108446      | 526.225600     | 263.616438       | D    | <b>1199.528720</b> | 600.267998        | 1182.502171        | 591.754724      | 1181.518155       | 591.262716       | 10 |
| 6  | 673.278758        | 337.143017        | 656.252209     | 328.629743      | 655.268193     | 328.137735       | E    | <b>1084.501777</b> | 542.754527        | 1067.475228        | 534.241252      | 1066.491212       | 533.749244       | 9  |
| 7  | 788.305701        | 394.656489        | 771.279152     | 386.143214      | 770.295136     | 385.651206       | D    | <b>955.459184</b>  | 478.233230        | 938.432635         | 469.719956      | 937.448619        | 469.227948       | 8  |
| 8  | 901.389765        | 451.198521        | 884.363216     | 442.685246      | 883.379200     | 442.193238       | I    | 840.432241         | 420.719759        | 823.405692         | 412.206484      | <b>822.421676</b> | 411.714476       | 7  |
| 9  | 1038.448677       | 519.727977        | 1021.422128    | 511.214702      | 1020.438112    | 510.722694       | H    | <b>727.348177</b>  | <b>364.177727</b> | 710.321628         | 355.664452      | 709.337612        | 355.172444       | 6  |
| 10 | 1139.496356       | 570.251816        | 1122.469807    | 561.738542      | 1121.485791    | 561.246534       | T    | <b>590.289265</b>  | 295.648271        | 573.262716         | 287.134996      | 572.278700        | 286.642988       | 5  |
| 11 | 1210.533470       | 605.770373        | 1193.506921    | 597.257099      | 1192.522905    | 596.765091       | A    | <b>489.241586</b>  | 245.124431        | 472.215037         | 236.611156      | 471.231021        | 236.119148       | 4  |
| 12 | 1324.576397       | 662.791837        | 1307.549848    | 654.278562      | 1306.565832    | 653.786554       | N    | 418.204472         | 209.605874        | 401.177923         | 201.092600      | 400.193907        | 200.600592       | 3  |
| 13 | 1453.618990       | <b>727.313133</b> | 1436.592441    | 718.799859      | 1435.608425    | 718.307851       | E    | 304.161545         | 152.584411        | 287.134996         | 144.071136      | 286.150980        | 143.579128       | 2  |
| 14 |                   |                   |                |                 |                |                  | R    | 175.118952         | 88.063114         | 158.092403         | 79.549839       |                   |                  | 1  |

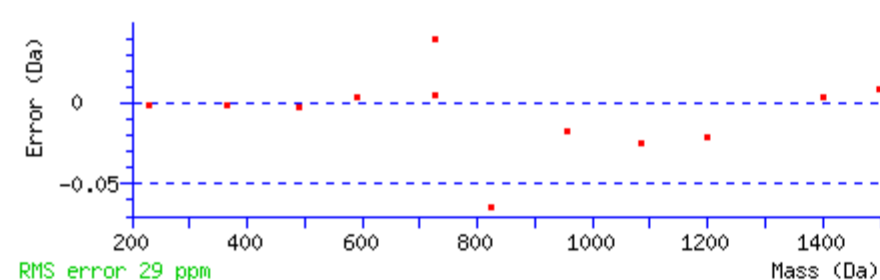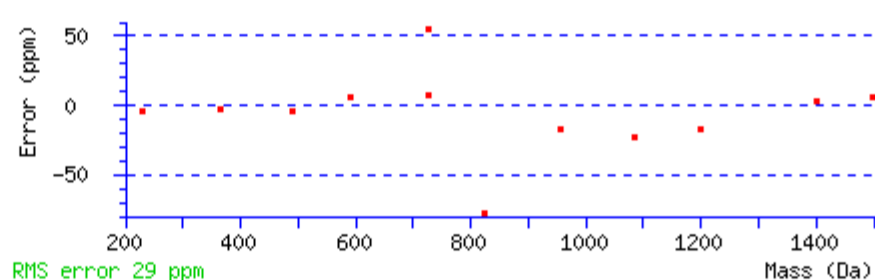

NCBI BLAST search of [LNSNDEDIHTANER](#)

(Parameters: blastp, nr protein database, expect=20000, no filter, PAM30)

Other BLAST [web gateways](#)

## All matches to this query

| Score | Mr(calc):   | Delta     | Sequence                         |
|-------|-------------|-----------|----------------------------------|
| 51.9  | 1626.723358 | 0.000944  | <a href="#">LNSNDEDIHTANER</a>   |
| 9.3   | 1626.716171 | 0.008131  | <a href="#">LN EEEPPGQDPWK</a>   |
| 6.8   | 1626.735489 | -0.011187 | <a href="#">QVCNERNCPHIGK</a>    |
| 2.3   | 1626.713486 | 0.010816  | <a href="#">GGPEHRS AWGEADSR</a> |
| 1.6   | 1626.719559 | 0.004743  | <a href="#">LTPNPDGPPSQAAPM</a>  |
| 0.6   | 1626.713013 | 0.011289  | <a href="#">VKEFCENLSADCR</a>    |
| 0.2   | 1626.726929 | -0.002627 | <a href="#">NLDCPELISEFMK</a>    |

**Peptide View**

MS/MS Fragmentation of **AQVDSSFLSLYDSHVAK**  
 Found in **ARM10\_HUMAN**, Armadillo repeat-containing protein 10 OS=Homo sapiens GN=ARMC10 PE=1 SV=1

Match to Query 53170: 1865.912712 from(622.978180,3+) rtinseconds(3010) index(39509)  
 Title: Locus:1.1.1.2563.22  
 Data file 2011-11-13 - TFD - EP 7-5.mgf

Click mouse within plot area to zoom in by factor of two about that point  
 Or, Plot from  to  Da   
 Label all possible matches  Label matches used for scoring

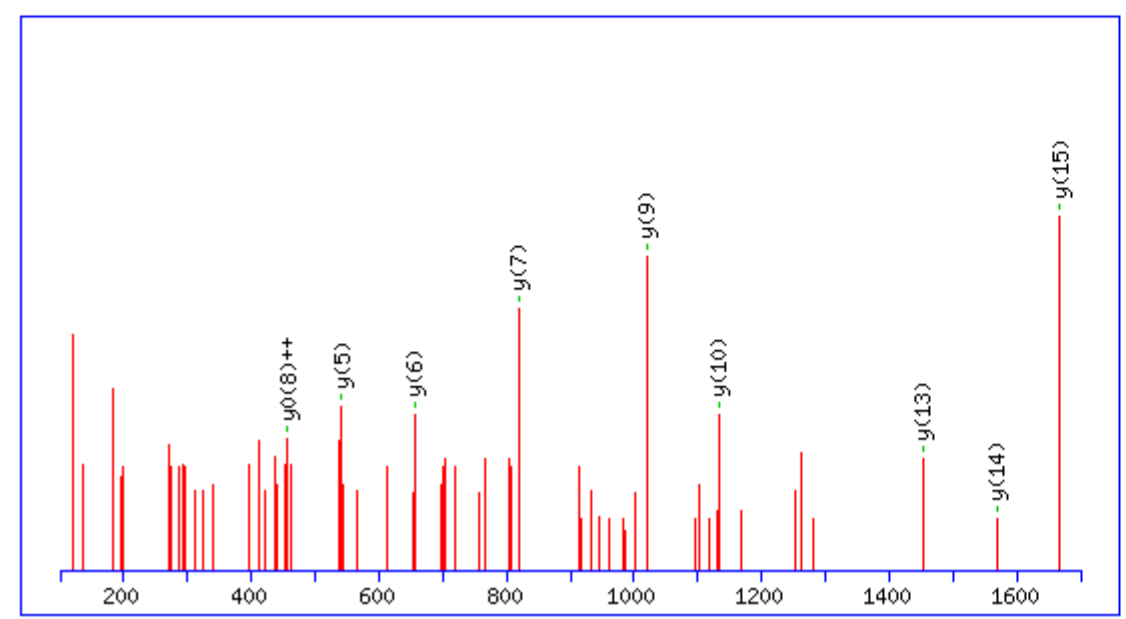

Monoisotopic mass of neutral peptide Mr(calcd): 1865.915939  
 Fixed modifications: Propionamide (C) (apply to specified residues or termini only)  
 Ions Score: 52 Expect: 0.0001  
 Matches : 9/176 fragment ions using 15 most intense peaks [\(help\)](#)

| #  | b           | b <sup>++</sup> | b <sup>+</sup> | b <sup>+++</sup> | b <sup>0</sup> | b <sup>0++</sup> | Seq. | y                  | y <sup>++</sup> | y <sup>+</sup> | y <sup>+++</sup> | y <sup>0</sup> | y <sup>0++</sup>  | #  |
|----|-------------|-----------------|----------------|------------------|----------------|------------------|------|--------------------|-----------------|----------------|------------------|----------------|-------------------|----|
| 1  | 72.044390   | 36.525833       |                |                  |                |                  | A    |                    |                 |                |                  |                |                   | 17 |
| 2  | 200.102968  | 100.555122      | 183.076419     | 92.041848        |                |                  | Q    | 1795.886105        | 898.446691      | 1778.859556    | 889.933416       | 1777.875540    | 889.441408        | 16 |
| 3  | 299.171382  | 150.089329      | 282.144833     | 141.576055       |                |                  | V    | <b>1667.827527</b> | 834.417402      | 1650.800978    | 825.904127       | 1649.816962    | 825.412119        | 15 |
| 4  | 414.198325  | 207.602801      | 397.171776     | 199.089526       | 396.187760     | 198.597518       | D    | <b>1568.759113</b> | 784.883195      | 1551.732564    | 776.369920       | 1550.748548    | 775.877912        | 14 |
| 5  | 501.230353  | 251.118814      | 484.203804     | 242.605540       | 483.219788     | 242.113532       | S    | <b>1453.732170</b> | 727.369723      | 1436.705621    | 718.856449       | 1435.721605    | 718.364441        | 13 |
| 6  | 588.262381  | 294.634829      | 571.235832     | 286.121554       | 570.251816     | 285.629546       | S    | 1366.700142        | 683.853709      | 1349.673593    | 675.340435       | 1348.689577    | 674.848427        | 12 |
| 7  | 735.330795  | 368.169036      | 718.304246     | 359.655761       | 717.320230     | 359.163753       | F    | 1279.668114        | 640.337695      | 1262.641565    | 631.824421       | 1261.657549    | 631.332413        | 11 |
| 8  | 848.414859  | 424.711068      | 831.388310     | 416.197793       | 830.404294     | 415.705785       | L    | <b>1132.599700</b> | 566.803488      | 1115.573151    | 558.290214       | 1114.589135    | 557.798206        | 10 |
| 9  | 935.446887  | 468.227082      | 918.420338     | 459.713807       | 917.436322     | 459.221799       | S    | <b>1019.515636</b> | 510.261456      | 1002.489087    | 501.748182       | 1001.505071    | 501.256174        | 9  |
| 10 | 1048.530951 | 524.769114      | 1031.504402    | 516.255839       | 1030.520386    | 515.763831       | L    | 932.483608         | 466.745442      | 915.457059     | 458.232168       | 914.473043     | <b>457.740160</b> | 8  |
| 11 | 1211.594280 | 606.300778      | 1194.567731    | 597.787504       | 1193.583715    | 597.295496       | Y    | <b>819.399544</b>  | 410.203410      | 802.372995     | 401.690136       | 801.388979     | 401.198128        | 7  |
| 12 | 1326.621223 | 663.814250      | 1309.594674    | 655.300975       | 1308.610658    | 654.808967       | D    | <b>656.336215</b>  | 328.671746      | 639.309666     | 320.158471       | 638.325650     | 319.666463        | 6  |
| 13 | 1413.653251 | 707.330264      | 1396.626702    | 698.816989       | 1395.642686    | 698.324981       | S    | <b>541.309272</b>  | 271.158274      | 524.282723     | 262.645000       | 523.298707     | 262.152992        | 5  |
| 14 | 1550.712163 | 775.859720      | 1533.685614    | 767.346445       | 1532.701598    | 766.854437       | H    | 454.277244         | 227.642260      | 437.250695     | 219.128986       |                |                   | 4  |
| 15 | 1649.780577 | 825.393927      | 1632.754028    | 816.880652       | 1631.770012    | 816.388644       | V    | 317.218332         | 159.112804      | 300.191783     | 150.599530       |                |                   | 3  |
| 16 | 1720.817691 | 860.912484      | 1703.791142    | 852.399209       | 1702.807126    | 851.907201       | A    | 218.149918         | 109.578597      | 201.123369     | 101.065322       |                |                   | 2  |
| 17 |             |                 |                |                  |                |                  | K    | 147.112804         | 74.060040       | 130.086255     | 65.546765        |                |                   | 1  |

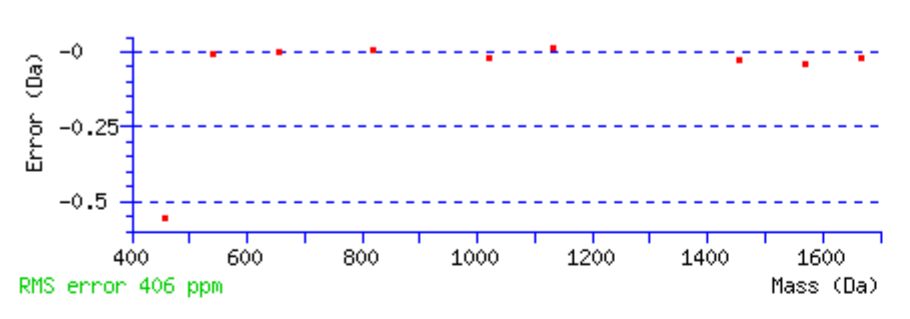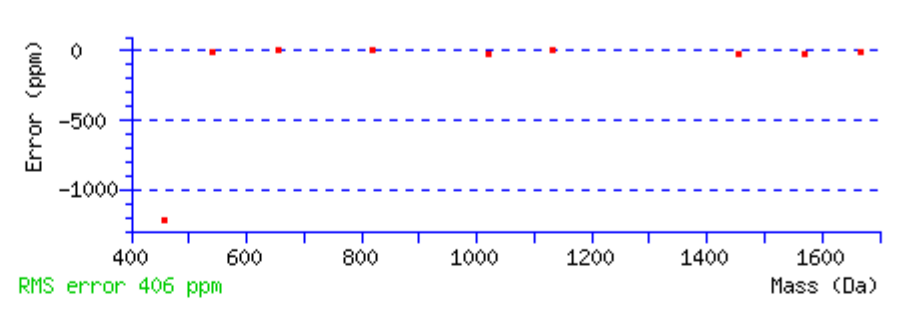

NCBI BLAST search of **AQVDSSFLSLYDSHVAK**  
 (Parameters: blastp, nr protein database, expect=20000, no filter, PAM30)  
 Other BLAST [web gateways](#)

**All matches to this query**

| Score | Mr(calcd):  | Delta     | Sequence                          |
|-------|-------------|-----------|-----------------------------------|
| 51.6  | 1865.915939 | -0.003227 | <a href="#">AQVDSSFLSLYDSHVAK</a> |

# MASCOT SCIENCE Mascot Search Results

## Peptide View

MS/MS Fragmentation of **KDISGS DK**

Found in **ARMC4\_HUMAN**, Armadillo repeat-containing protein 4 OS=Homo sapiens GN=ARMC4 PE=2 SV=1

Match to Query 61542: 848.418188 from(425.216370,2+) rtinseconds(4879) index(968293)

Title: Locus:1.1.1.2254.3

Data file C:\Program Files (x86)\Matrix Science\Mascot Daemon\mgf3 TFD - Epitel - R2\mascot\_daemon\_merge.mgf

Click mouse within plot area to zoom in by factor of two about that point

Or, Plot from  to  Da

Label all possible matches  Label matches used for scoring

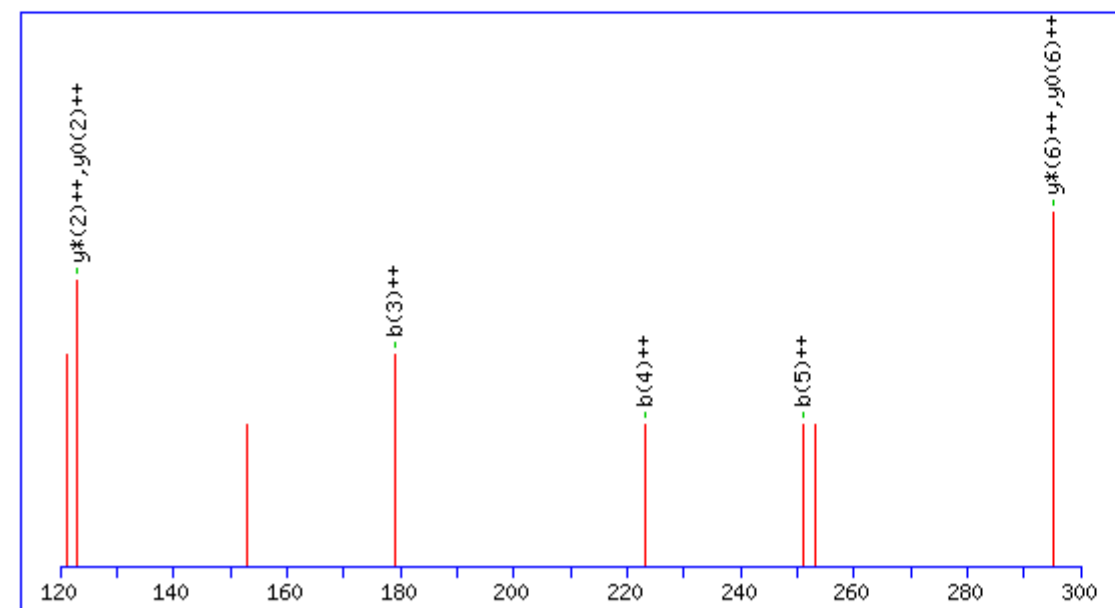

Monoisotopic mass of neutral peptide Mr(calc): 848.423950

Fixed modifications: Carbamidomethyl (C) (apply to specified residues or termini only)

Ions Score: 49 Expect: 0.00061

Matches : 9/80 fragment ions using 6 most intense peaks [\(help\)](#)

| # | b          | b <sup>++</sup>   | b <sup>*</sup> | b <sup>*++</sup> | b <sup>0</sup> | b <sup>0++</sup> | Seq.     | y          | y <sup>++</sup> | y <sup>*</sup> | y <sup>*++</sup>  | y <sup>0</sup> | y <sup>0++</sup>  | # |
|---|------------|-------------------|----------------|------------------|----------------|------------------|----------|------------|-----------------|----------------|-------------------|----------------|-------------------|---|
| 1 | 129.102239 | 65.054757         | 112.075690     | 56.541483        |                |                  | <b>K</b> |            |                 |                |                   |                |                   | 8 |
| 2 | 244.129182 | <b>122.568229</b> | 227.102633     | 114.054955       | 226.118617     | 113.562947       | <b>D</b> | 721.336274 | 361.171775      | 704.309725     | 352.658501        | 703.325709     | 352.166493        | 7 |
| 3 | 357.213246 | <b>179.110261</b> | 340.186697     | 170.596987       | 339.202681     | 170.104979       | <b>I</b> | 606.309331 | 303.658304      | 589.282782     | <b>295.145029</b> | 588.298766     | <b>294.653021</b> | 6 |
| 4 | 444.245274 | <b>222.626275</b> | 427.218725     | 214.113001       | 426.234709     | 213.620993       | <b>S</b> | 493.225267 | 247.116271      | 476.198718     | 238.602997        | 475.214702     | 238.110989        | 5 |
| 5 | 501.266738 | <b>251.137007</b> | 484.240189     | 242.623733       | 483.256173     | 242.131725       | <b>G</b> | 406.193239 | 203.600257      | 389.166690     | 195.086983        | 388.182674     | 194.594975        | 4 |
| 6 | 588.298766 | <b>294.653021</b> | 571.272217     | 286.139747       | 570.288201     | 285.647739       | <b>S</b> | 349.171775 | 175.089525      | 332.145226     | 166.576251        | 331.161210     | 166.084243        | 3 |
| 7 | 703.325709 | 352.166493        | 686.299160     | 343.653218       | 685.315144     | 343.161210       | <b>D</b> | 262.139747 | 131.573511      | 245.113198     | <b>123.060237</b> | 244.129182     | <b>122.568229</b> | 2 |
| 8 |            |                   |                |                  |                |                  | <b>K</b> | 147.112804 | 74.060040       | 130.086255     | 65.546765         |                |                   | 1 |

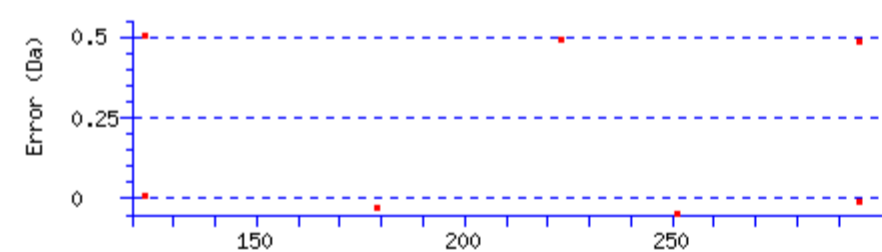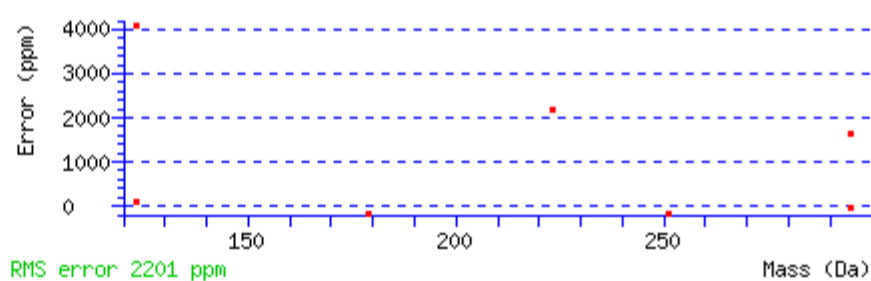

NCBI BLAST search of **KDISGS DK**

(Parameters: blastp, nr protein database, expect=20000, no filter, PAM30)

Other BLAST [web gateways](#)

## All matches to this query

| Score | Mr(calc):  | Delta     | Sequence                  |
|-------|------------|-----------|---------------------------|
| 48.9  | 848.423950 | -0.005762 | <a href="#">KDISGS DK</a> |
| 31.5  | 848.410034 | 0.008154  | <a href="#">RSSPGSSR</a>  |
| 15.2  | 848.424820 | -0.006632 | <a href="#">MPIVMAR</a>   |
| 15.2  | 848.417419 | 0.000769  | <a href="#">MPQSKSR</a>   |
| 15.2  | 848.417419 | 0.000769  | <a href="#">MPQSKSR</a>   |
| 8.2   | 848.421448 | -0.003260 | <a href="#">QMGSWLK</a>   |
| 8.2   | 848.423965 | -0.005777 | <a href="#">TKTDGSPK</a>  |
| 7.8   | 848.423965 | -0.005777 | <a href="#">ISGSVSGDK</a> |
| 7.5   | 848.413559 | 0.004629  | <a href="#">LMAEALAM</a>  |
| 2.3   | 848.413589 | 0.004599  | <a href="#">MLLDQVM</a>   |

Mascot: <http://www.matrixscience.com/>

# Mascot Search Results

## Peptide View

MS/MS Fragmentation of **QVAEARSR**

Found in **ARMC7\_HUMAN**, Armadillo repeat-containing protein 7 OS=Homo sapiens GN=ARMC7 PE=2 SV=1

Match to Query 9363: 915.479888 from(458.747220,2+) rtinseconds(1422) index(11527)

Title: Locus:1.1.1.1986.10

Data file 2011-11-10 - TFD - EP 3-2.mgf

Click mouse within plot area to zoom in by factor of two about that point

Or, Plot from  to  Da

Label all possible matches  Label matches used for scoring

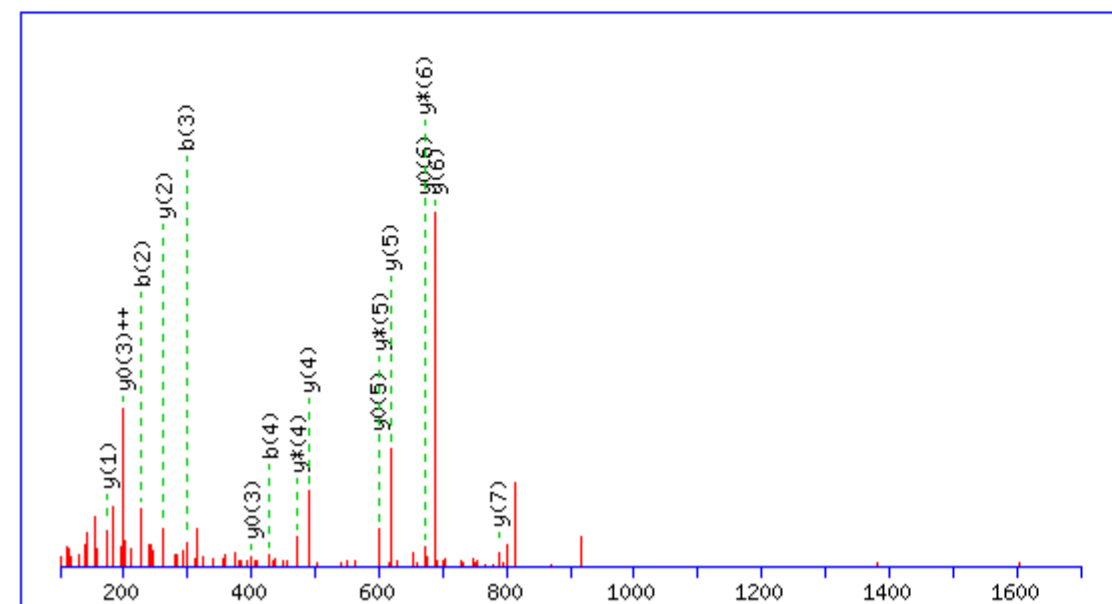

Monoisotopic mass of neutral peptide Mr(calc): 915.488602

Fixed modifications: Propionamide (C) (apply to specified residues or termini only)

Ions Score: 36 Expect: 0.0041

Matches : 16/76 fragment ions using 31 most intense peaks [\(help\)](#)

| # | b                 | b <sup>++</sup> | b*         | b <sup>+++</sup> | b <sup>0</sup> | b <sup>0++</sup> | Seq. | y                 | y <sup>++</sup> | y*                | y <sup>+++</sup> | y <sup>0</sup>    | y <sup>0++</sup>  | # |
|---|-------------------|-----------------|------------|------------------|----------------|------------------|------|-------------------|-----------------|-------------------|------------------|-------------------|-------------------|---|
| 1 | 129.065854        | 65.036565       | 112.039305 | 56.523291        |                |                  | Q    |                   |                 |                   |                  |                   |                   | 8 |
| 2 | <b>228.134268</b> | 114.570772      | 211.107719 | 106.057498       |                |                  | V    | <b>788.437326</b> | 394.722301      | 771.410777        | 386.209027       | 770.426761        | 385.717019        | 7 |
| 3 | <b>299.171382</b> | 150.089329      | 282.144833 | 141.576055       |                |                  | A    | <b>689.368912</b> | 345.188094      | <b>672.342363</b> | 336.674820       | <b>671.358347</b> | 336.182812        | 6 |
| 4 | <b>428.213975</b> | 214.610626      | 411.187426 | 206.097351       | 410.203410     | 205.605343       | E    | <b>618.331798</b> | 309.669537      | <b>601.305249</b> | 301.156263       | <b>600.321233</b> | 300.664255        | 5 |
| 5 | 499.251089        | 250.129183      | 482.224540 | 241.615908       | 481.240524     | 241.123900       | A    | <b>489.289205</b> | 245.148240      | <b>472.262656</b> | 236.634966       | 471.278640        | 236.142958        | 4 |
| 6 | 655.352200        | 328.179738      | 638.325651 | 319.666464       | 637.341635     | 319.174456       | R    | 418.252091        | 209.629683      | 401.225542        | 201.116409       | <b>400.241526</b> | <b>200.624401</b> | 3 |
| 7 | 742.384228        | 371.695752      | 725.357679 | 363.182478       | 724.373663     | 362.690470       | S    | <b>262.150980</b> | 131.579128      | 245.124431        | 123.065854       | 244.140415        | 122.573846        | 2 |
| 8 |                   |                 |            |                  |                |                  | R    | <b>175.118952</b> | 88.063114       | 158.092403        | 79.549840        |                   |                   | 1 |

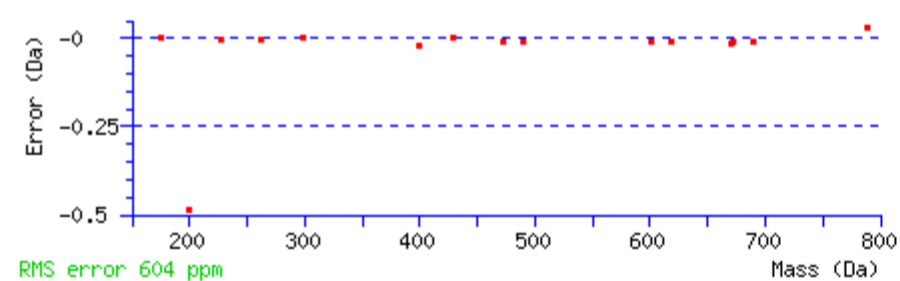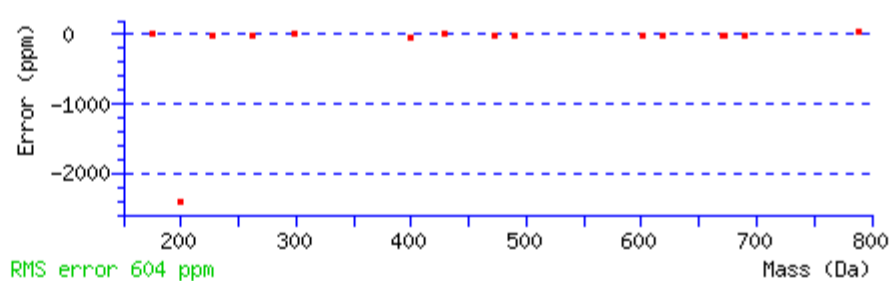

NCBI BLAST search of **QVAEARSR**

(Parameters: blastp, nr protein database, expect=20000, no filter, PAM30)

Other BLAST [web gateways](#)

All matches to this query

| Score | Mr(calc):  | Delta     | Sequence                  |
|-------|------------|-----------|---------------------------|
| 45.6  | 915.477356 | 0.002532  | <a href="#">NLAENISR</a>  |
| 35.6  | 915.488602 | -0.008714 | <a href="#">QVAEARSR</a>  |
| 18.3  | 915.477356 | 0.002532  | <a href="#">ARAEIANDK</a> |
| 12.6  | 915.488617 | -0.008729 | <a href="#">GGLPSASRR</a> |
| 8.3   | 915.477356 | 0.002532  | <a href="#">LNENAIISR</a> |
| 7.7   | 915.477371 | 0.002517  | <a href="#">QVADAREK</a>  |
| 6.6   | 915.484756 | -0.004868 | <a href="#">IMLSPEAR</a>  |
| 4.9   | 915.488617 | -0.008729 | <a href="#">NISTPRGR</a>  |
| 3.2   | 915.488617 | -0.008729 | <a href="#">AQRVSSPR</a>  |
| 3.1   | 915.470840 | 0.009048  | <a href="#">CRPNLSR</a>   |

# MASCOT SCIENCE Mascot Search Results

## Peptide View

MS/MS Fragmentation of **IFDSEEILAGYK**

Found in **SYNC\_HUMAN**, Asparaginyl-tRNA synthetase, cytoplasmic OS=Homo sapiens GN=NARS PE=1 SV=1

Match to Query 35313: 1383.683948 from(692.849250,2+) rtinseconds(2977) index(41089)

Title: Locus:1.1.1.1511.30

Data file 2012-01-27 - TFD - Epitel - IEC - 10ul - 2.mgf

Click mouse within plot area to zoom in by factor of two about that point

Or, Plot from  to  Da

Label all possible matches  Label matches used for scoring

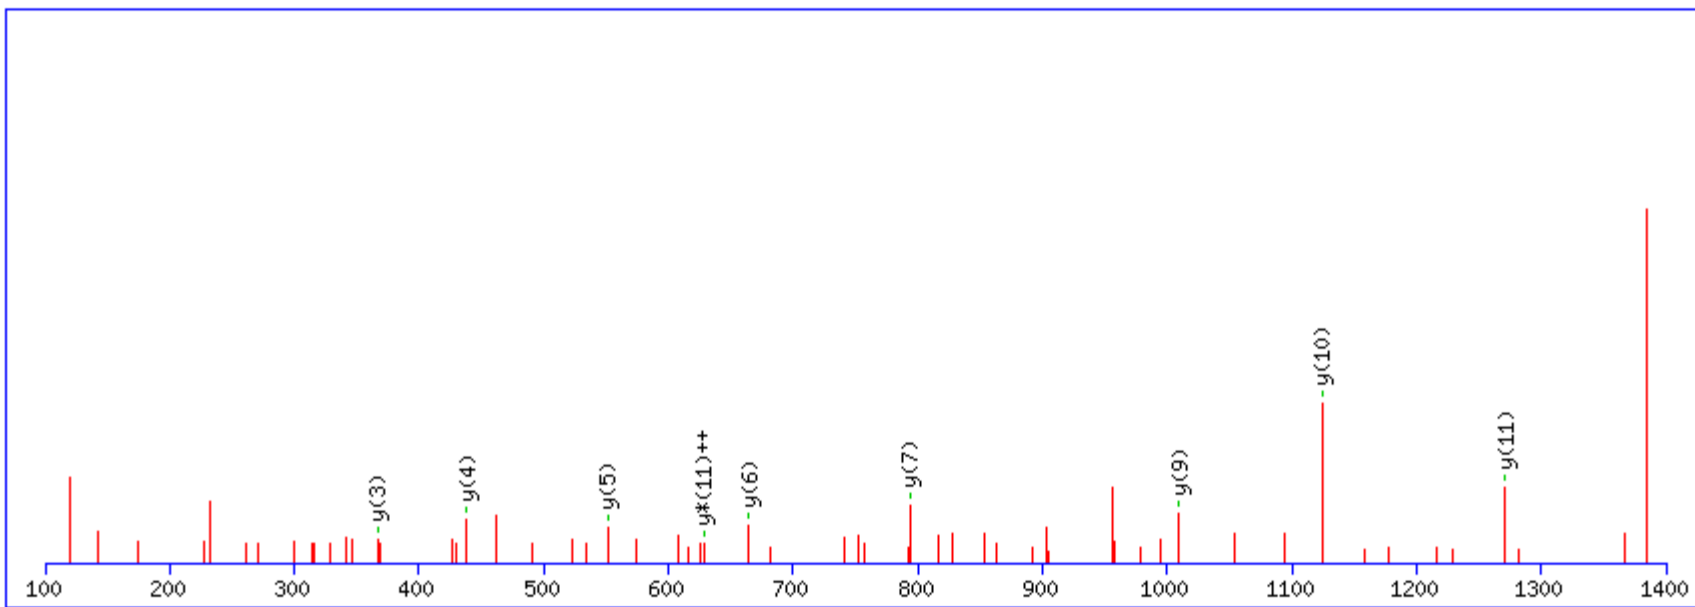

Monoisotopic mass of neutral peptide Mr(calc): 1383.692169

Fixed modifications: Carbamidomethyl (C) (apply to specified residues or termini only)

Ions Score: 41 Expect: 0.00023

Matches : 9/94 fragment ions using 25 most intense peaks [\(help\)](#)

| #  | b           | b <sup>++</sup> | b <sup>0</sup> | b <sup>0++</sup> | Seq. | y                  | y <sup>++</sup> | y <sup>*</sup> | y <sup>*++</sup>  | y <sup>0</sup> | y <sup>0++</sup> | #  |
|----|-------------|-----------------|----------------|------------------|------|--------------------|-----------------|----------------|-------------------|----------------|------------------|----|
| 1  | 114.091340  | 57.549308       |                |                  | I    |                    |                 |                |                   |                |                  | 12 |
| 2  | 261.159754  | 131.083515      |                |                  | F    | <b>1271.615410</b> | 636.311343      | 1254.588861    | <b>627.798069</b> | 1253.604845    | 627.306061       | 11 |
| 3  | 376.186697  | 188.596986      | 358.176132     | 179.591704       | D    | <b>1124.546996</b> | 562.777136      | 1107.520447    | 554.263862        | 1106.536431    | 553.771854       | 10 |
| 4  | 463.218725  | 232.113001      | 445.208160     | 223.107718       | S    | <b>1009.520053</b> | 505.263665      | 992.493504     | 496.750390        | 991.509488     | 496.258382       | 9  |
| 5  | 592.261318  | 296.634297      | 574.250753     | 287.629015       | E    | 922.488025         | 461.747651      | 905.461476     | 453.234376        | 904.477460     | 452.742368       | 8  |
| 6  | 721.303911  | 361.155594      | 703.293346     | 352.150311       | E    | <b>793.445432</b>  | 397.226354      | 776.418883     | 388.713080        | 775.434867     | 388.221072       | 7  |
| 7  | 834.387975  | 417.697626      | 816.377410     | 408.692343       | I    | <b>664.402839</b>  | 332.705058      | 647.376290     | 324.191783        |                |                  | 6  |
| 8  | 947.472039  | 474.239658      | 929.461474     | 465.234375       | L    | <b>551.318775</b>  | 276.163026      | 534.292226     | 267.649751        |                |                  | 5  |
| 9  | 1018.509153 | 509.758215      | 1000.498588    | 500.752932       | A    | <b>438.234711</b>  | 219.620994      | 421.208162     | 211.107719        |                |                  | 4  |
| 10 | 1075.530617 | 538.268947      | 1057.520052    | 529.263664       | G    | <b>367.197597</b>  | 184.102437      | 350.171048     | 175.589162        |                |                  | 3  |
| 11 | 1238.593946 | 619.800611      | 1220.583381    | 610.795329       | Y    | 310.176133         | 155.591705      | 293.149584     | 147.078430        |                |                  | 2  |
| 12 |             |                 |                |                  | K    | 147.112804         | 74.060040       | 130.086255     | 65.546765         |                |                  | 1  |

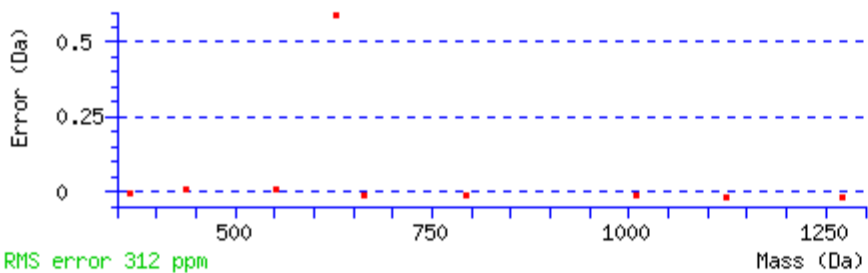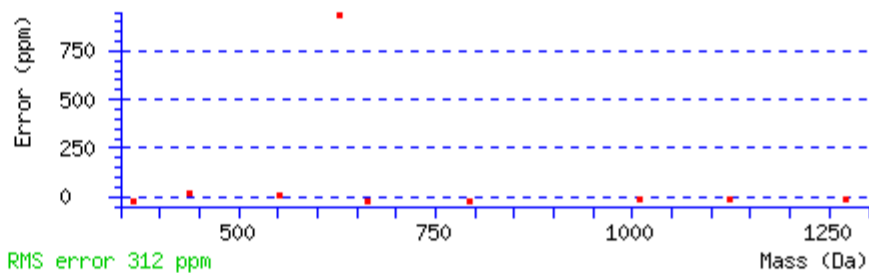

NCBI BLAST search of [IFDSEEILAGYK](#)

(Parameters: blastp, nr protein database, expect=20000, no filter, PAM30)

Other BLAST [web gateways](#)

All matches to this query

| Score | Mr(calc):   | Delta     | Sequence                       |
|-------|-------------|-----------|--------------------------------|
| 41.4  | 1383.692169 | -0.008221 | <a href="#">IFDSEEILAGYK</a>   |
| 2.6   | 1383.681641 | 0.002307  | <a href="#">LPSAPSGGAPIRDM</a> |

**Peptide View**

MS/MS Fragmentation of **RPDLLTMVVDYR**  
 Found in **PEA15\_HUMAN**, Astrocytic phosphoprotein PEA-15 OS=Homo sapiens GN=PEA15 PE=1 SV=2

Match to Query 40316: 1492.769622 from(498.597150,3+) rtinseconds(2911) index(32415)  
 Title: Locus:1.1.1.2444.8  
 Data file 2011-11-12 - TFD - EP 6-7.mgf

Click mouse within plot area to zoom in by factor of two about that point  
 Or, Plot from  to  Da   
 Label all possible matches  Label matches used for scoring

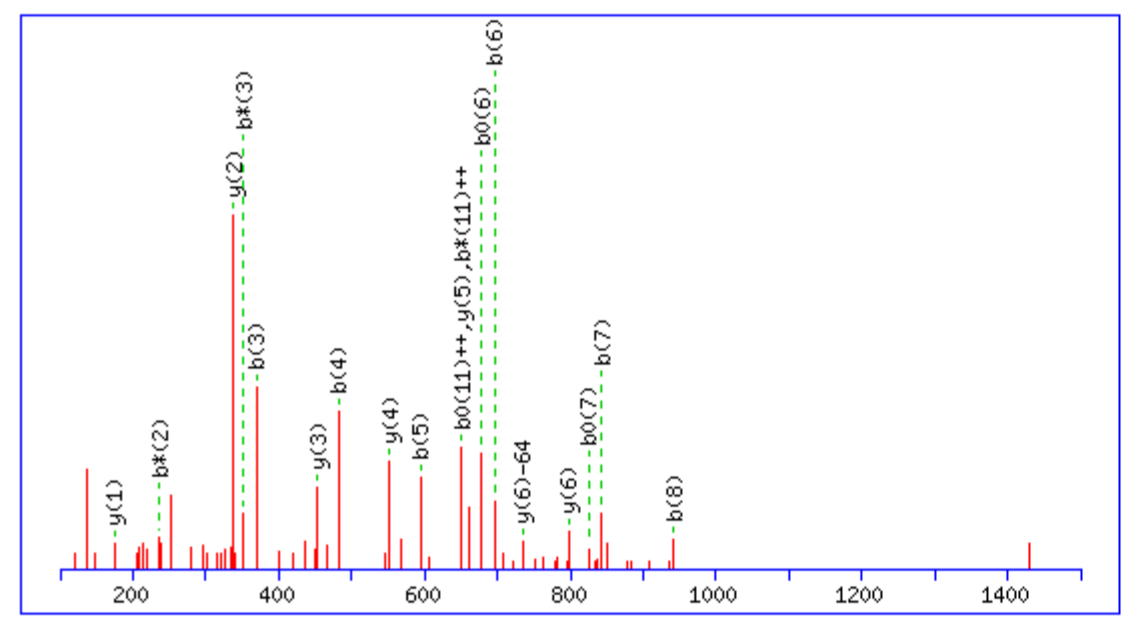

Monoisotopic mass of neutral peptide Mr(calc): 1492.770798  
 Fixed modifications: Propionamide (C) (apply to specified residues or termini only)  
 Variable modifications:  
 M7 : Oxidation (M), with neutral losses 0.000000 (shown in table), 63.998285  
 Ions Score: 48 Expect: 4.2e-005  
 Matches : 19/190 fragment ions using 28 most intense peaks [\(help\)](#)

| #  | b           | b <sup>++</sup> | b*          | b <sup>+++</sup> | b <sup>0</sup> | b <sup>0++</sup> | Seq. | y           | y <sup>++</sup> | y*          | y <sup>+++</sup> | y <sup>0</sup> | y <sup>0++</sup> | #  |
|----|-------------|-----------------|-------------|------------------|----------------|------------------|------|-------------|-----------------|-------------|------------------|----------------|------------------|----|
| 1  | 157.108387  | 79.057831       | 140.081838  | 70.544557        |                |                  | R    |             |                 |             |                  |                |                  | 12 |
| 2  | 254.161151  | 127.584213      | 237.134602  | 119.070939       |                |                  | P    | 1337.676966 | 669.342121      | 1320.650417 | 660.828847       | 1319.666401    | 660.336839       | 11 |
| 3  | 369.188094  | 185.097685      | 352.161545  | 176.584410       | 351.177529     | 176.092402       | D    | 1240.624202 | 620.815739      | 1223.597653 | 612.302465       | 1222.613637    | 611.810457       | 10 |
| 4  | 482.272158  | 241.639717      | 465.245609  | 233.126443       | 464.261593     | 232.634435       | L    | 1125.597259 | 563.302268      | 1108.570710 | 554.788993       | 1107.586694    | 554.296985       | 9  |
| 5  | 595.356222  | 298.181749      | 578.329673  | 289.668475       | 577.345657     | 289.176467       | L    | 1012.513195 | 506.760236      | 995.486646  | 498.246961       | 994.502630     | 497.754953       | 8  |
| 6  | 696.403901  | 348.705589      | 679.377352  | 340.192314       | 678.393336     | 339.700306       | T    | 899.429131  | 450.218204      | 882.402582  | 441.704929       | 881.418566     | 441.212921       | 7  |
| 7  | 843.439301  | 422.223289      | 826.412752  | 413.710014       | 825.428736     | 413.218006       | M    | 798.381452  | 399.694364      | 781.354903  | 391.181090       | 780.370887     | 390.689082       | 6  |
| 8  | 942.507715  | 471.757496      | 925.481166  | 463.244221       | 924.497150     | 462.752213       | V    | 651.346052  | 326.176664      | 634.319503  | 317.663390       | 633.335487     | 317.171382       | 5  |
| 9  | 1041.576129 | 521.291703      | 1024.549580 | 512.778428       | 1023.565564    | 512.286420       | V    | 552.277638  | 276.642457      | 535.251089  | 268.129183       | 534.267073     | 267.637175       | 4  |
| 10 | 1156.603072 | 578.805174      | 1139.576523 | 570.291900       | 1138.592507    | 569.799892       | D    | 453.209224  | 227.108250      | 436.182675  | 218.594976       | 435.198659     | 218.102968       | 3  |
| 11 | 1319.666401 | 660.336839      | 1302.639852 | 651.823564       | 1301.655836    | 651.331556       | Y    | 338.182281  | 169.594778      | 321.155732  | 161.081504       |                |                  | 2  |
| 12 |             |                 |             |                  |                |                  | R    | 175.118952  | 88.063114       | 158.092403  | 79.549839        |                |                  | 1  |

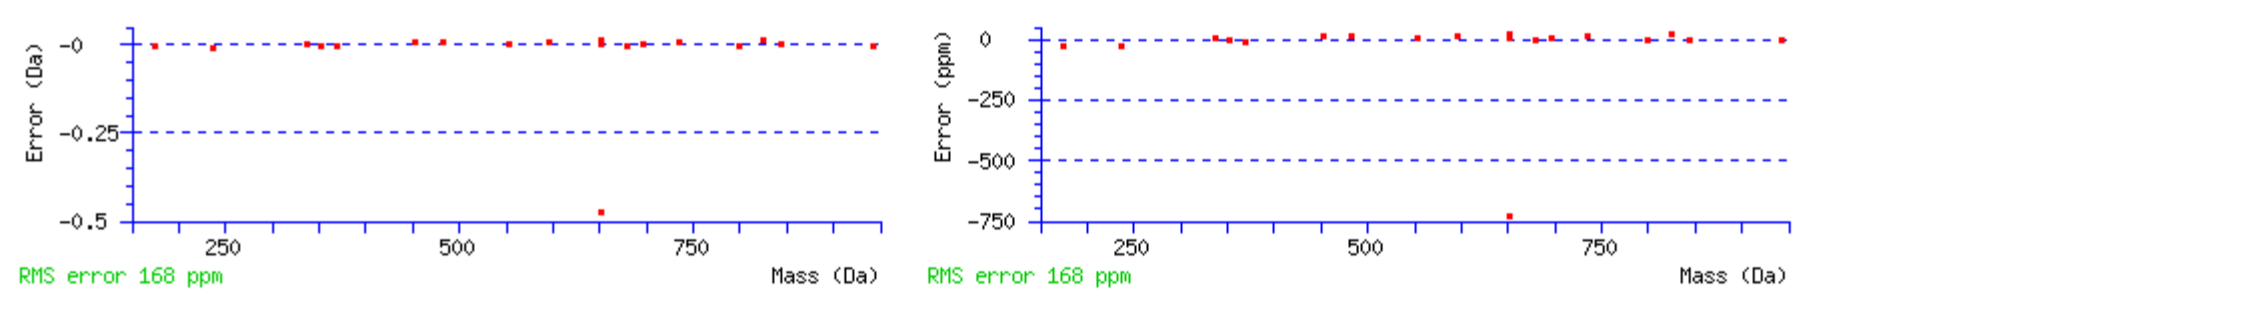

NCBI BLAST search of **RPDLLTMVVDYR**  
 (Parameters: blastp, nr protein database, expect=20000, no filter, PAM30)  
 Other BLAST [web gateways](#)

**All matches to this query**

| Score | Mr(calc):   | Delta     | Sequence                       |
|-------|-------------|-----------|--------------------------------|
| 47.7  | 1492.770798 | -0.001176 | <a href="#">RPDLLTMVVDYR</a>   |
| 21.7  | 1492.770798 | -0.001176 | <a href="#">RPDLLTMVVDYR</a>   |
| 1.0   | 1492.762894 | 0.006728  | <a href="#">EMISSNIQAMIIK</a>  |
| 0.9   | 1492.760895 | 0.008727  | <a href="#">QFRGPMMAAISFPR</a> |
| 0.3   | 1492.770782 | -0.001160 | <a href="#">ECGKAFISLPSVR</a>  |
| 0.3   | 1492.777267 | -0.007645 | <a href="#">SLAYALEKNLEDK</a>  |
| 0.1   | 1492.777313 | -0.007691 | <a href="#">TNLTTFNPSILEK</a>  |

# **MATRIX** SCIENCE Mascot Search Results

## Peptide View

MS/MS Fragmentation of **ISLAPTDVK**

Found in **ATX2L\_HUMAN**, Ataxin-2-like protein OS=Homo sapiens GN=ATXN2L PE=1 SV=2

Match to Query 183813: 942.544508 from(472.279530,2+) rtinseconds(1894) index(427775)

Title: Locus:1.1.1.1064.6

Data file C:\Program Files (x86)\Matrix Science\Mascot Daemon\mgf3 TFD - Epitel - R2\mascot\_daemon\_merge.mgf

Click mouse within plot area to zoom in by factor of two about that point

Or, Plot from  to  Da

Label all possible matches  Label matches used for scoring

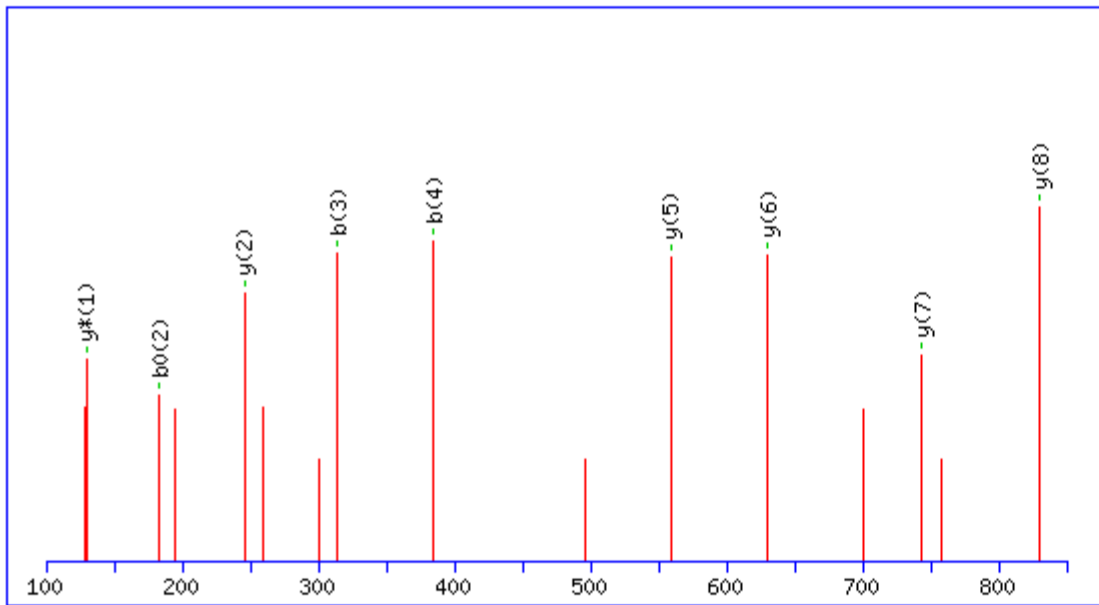

Monoisotopic mass of neutral peptide  $M_r(\text{calc})$ : 942.538589

Fixed modifications: Carbamidomethyl (C) (apply to specified residues or termini only)

Ions Score: 42 Expect: 0.0013

Matches : 9/74 fragment ions using 12 most intense peaks ([help](#))

| # | b          | b <sup>++</sup> | b <sup>0</sup> | b <sup>0++</sup> | Seq. | y          | y <sup>++</sup> | y <sup>*</sup> | y <sup>+++</sup> | y <sup>0</sup> | y <sup>0++</sup> | # |
|---|------------|-----------------|----------------|------------------|------|------------|-----------------|----------------|------------------|----------------|------------------|---|
| 1 | 114.091340 | 57.549308       |                |                  | I    |            |                 |                |                  |                |                  | 9 |
| 2 | 201.123368 | 101.065322      | 183.112803     | 92.060039        | S    | 830.461810 | 415.734543      | 813.435261     | 407.221269       | 812.451245     | 406.729261       | 8 |
| 3 | 314.207432 | 157.607354      | 296.196867     | 148.602071       | L    | 743.429782 | 372.218529      | 726.403233     | 363.705255       | 725.419217     | 363.213247       | 7 |
| 4 | 385.244546 | 193.125911      | 367.233981     | 184.120628       | A    | 630.345718 | 315.676497      | 613.319169     | 307.163223       | 612.335153     | 306.671215       | 6 |
| 5 | 482.297310 | 241.652293      | 464.286745     | 232.647010       | P    | 559.308604 | 280.157940      | 542.282055     | 271.644666       | 541.298039     | 271.152658       | 5 |
| 6 | 583.344989 | 292.176133      | 565.334424     | 283.170850       | T    | 462.255840 | 231.631558      | 445.229291     | 223.118283       | 444.245275     | 222.626275       | 4 |
| 7 | 698.371932 | 349.689604      | 680.361367     | 340.684322       | D    | 361.208161 | 181.107718      | 344.181612     | 172.594444       | 343.197596     | 172.102436       | 3 |
| 8 | 797.440346 | 399.223811      | 779.429781     | 390.218528       | V    | 246.181218 | 123.594247      | 229.154669     | 115.080972       |                |                  | 2 |
| 9 |            |                 |                |                  | K    | 147.112804 | 74.060040       | 130.086255     | 65.546765        |                |                  | 1 |

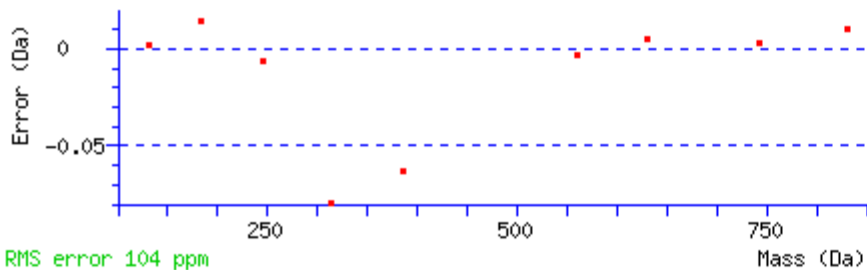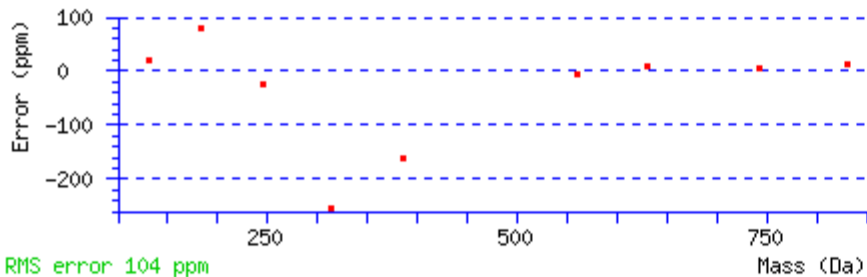

NCBI BLAST search of **ISLAPTDVK**

(Parameters: blastp, nr protein database, expect=20000, no filter, PAM30)

Other BLAST [web gateways](#)

## All matches to this query

| Score | $M_r(\text{calc})$ : | Delta     | Sequence                  |
|-------|----------------------|-----------|---------------------------|
| 41.8  | 942.538589           | 0.005919  | <a href="#">ISLAPTDVK</a> |
| 14.9  | 942.549820           | -0.005312 | <a href="#">LSPVQKQK</a>  |
| 13.0  | 942.549820           | -0.005312 | <a href="#">LSIIGPTSR</a> |
| 13.0  | 942.549805           | -0.005297 | <a href="#">LSLKTPER</a>  |
| 11.5  | 942.538559           | 0.005949  | <a href="#">EALEAVLAK</a> |
| 10.3  | 942.538589           | 0.005919  | <a href="#">LAEGVLDVK</a> |
| 10.3  | 942.538559           | 0.005949  | <a href="#">ALEAALVEK</a> |
| 9.9   | 942.538559           | 0.005949  | <a href="#">IEAQELLK</a>  |
| 9.4   | 942.549789           | -0.005281 | <a href="#">NAKEALAVK</a> |
| 8.8   | 942.549835           | -0.005327 | <a href="#">ISGVQVNVK</a> |

**Peptide View**

MS/MS Fragmentation of **MLNTNYHLPPSPKPMK**  
 Found in **ATP8\_HUMAN**, ATP synthase protein 8 OS=Homo sapiens GN=MT-ATP8 PE=1 SV=1

Match to Query 24876: 1898.944296 from(475.743350,4+) rtinseconds(1773) index(7048)  
 Title: Locus:1.1.1.2397.14  
 Data file 2011-11-14 - TFD - EP 8-8.mgf

Click mouse within plot area to zoom in by factor of two about that point  
 Or,  to  Da   
 Label all possible matches  Label matches used for scoring

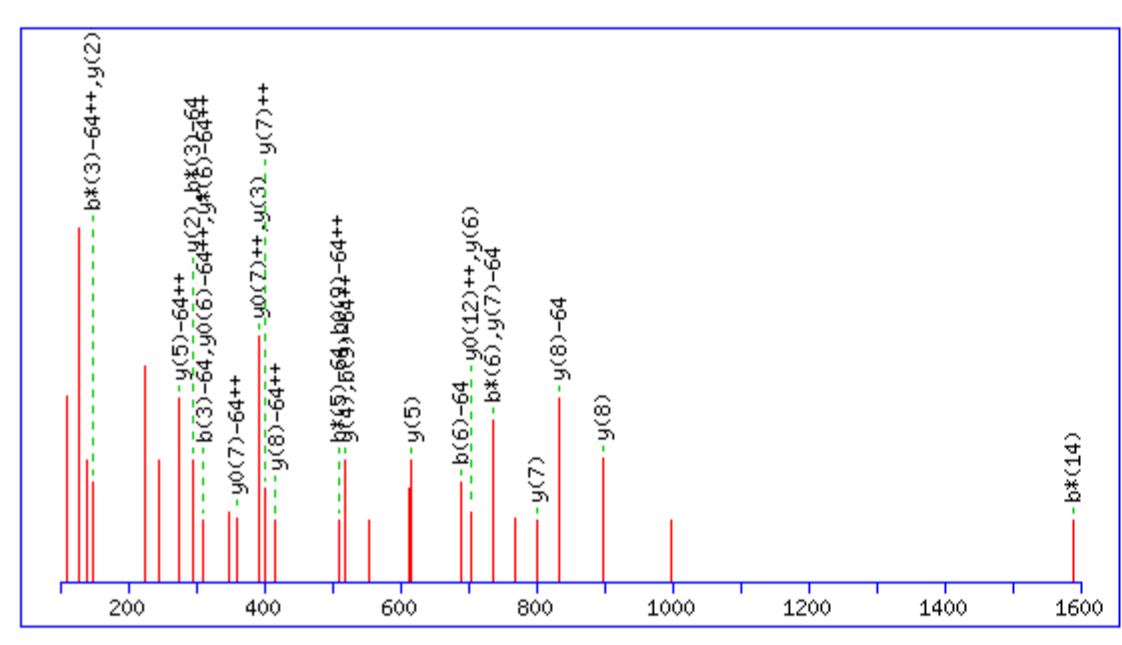

Monoisotopic mass of neutral peptide Mr(calc): 1898.938248  
 Fixed modifications: Propionamide (C) (apply to specified residues or termini only)  
 Variable modifications:  
 M1 : Oxidation (M), with neutral losses 0.000000 (shown in table), 63.998285  
 M15 : Oxidation (M), with neutral losses 0.000000 (shown in table), 63.998285  
 Ions Score: 36 Expect: 0.00066  
 Matches : 28/316 fragment ions using 32 most intense peaks ([help](#))

| #  | b           | b <sup>++</sup> | b <sup>+</sup> | b <sup>+++</sup> | b <sup>0</sup> | b <sup>0++</sup> | Seq. | y           | y <sup>++</sup> | y <sup>+</sup> | y <sup>+++</sup> | y <sup>0</sup> | y <sup>0++</sup> | #  |
|----|-------------|-----------------|----------------|------------------|----------------|------------------|------|-------------|-----------------|----------------|------------------|----------------|------------------|----|
| 1  | 148.042676  | 74.524976       |                |                  |                |                  | M    |             |                 |                |                  |                |                  | 16 |
| 2  | 261.126740  | 131.067008      |                |                  |                |                  | L    | 1752.910153 | 876.958715      | 1735.883604    | 868.445440       | 1734.899588    | 867.953432       | 15 |
| 3  | 375.169667  | 188.088472      | 358.143118     | 179.575197       |                |                  | N    | 1639.826089 | 820.416683      | 1622.799540    | 811.903408       | 1621.815524    | 811.411400       | 14 |
| 4  | 476.217346  | 238.612311      | 459.190797     | 230.099037       | 458.206781     | 229.607029       | T    | 1525.783162 | 763.395219      | 1508.756613    | 754.881945       | 1507.772597    | 754.389937       | 13 |
| 5  | 590.260273  | 295.633775      | 573.233724     | 287.120500       | 572.249708     | 286.628492       | N    | 1424.735483 | 712.871380      | 1407.708934    | 704.358105       | 1406.724918    | 703.866097       | 12 |
| 6  | 753.323602  | 377.165439      | 736.297053     | 368.652165       | 735.313037     | 368.160157       | Y    | 1310.692556 | 655.849916      | 1293.666007    | 647.336642       | 1292.681991    | 646.844634       | 11 |
| 7  | 890.382514  | 445.694895      | 873.355965     | 437.181621       | 872.371949     | 436.689613       | H    | 1147.629227 | 574.318252      | 1130.602678    | 565.804977       | 1129.618662    | 565.312969       | 10 |
| 8  | 1003.466578 | 502.236927      | 986.440029     | 493.723653       | 985.456013     | 493.231645       | L    | 1010.570315 | 505.788796      | 993.543766     | 497.275521       | 992.559750     | 496.783513       | 9  |
| 9  | 1100.519342 | 550.763309      | 1083.492793    | 542.250035       | 1082.508777    | 541.758027       | P    | 897.486251  | 449.246764      | 880.459702     | 440.733489       | 879.475686     | 440.241481       | 8  |
| 10 | 1197.572106 | 599.289691      | 1180.545557    | 590.776417       | 1179.561541    | 590.284409       | P    | 800.433487  | 400.720382      | 783.406938     | 392.207107       | 782.422922     | 391.715099       | 7  |
| 11 | 1284.604134 | 642.805705      | 1267.577585    | 634.292431       | 1266.593569    | 633.800423       | S    | 703.380723  | 352.194000      | 686.354174     | 343.680725       | 685.370158     | 343.188717       | 6  |
| 12 | 1381.656898 | 691.332087      | 1364.630349    | 682.818813       | 1363.646333    | 682.326805       | P    | 616.348695  | 308.677986      | 599.322146     | 300.164711       |                |                  | 5  |
| 13 | 1509.751861 | 755.379569      | 1492.725312    | 746.866294       | 1491.741296    | 746.374286       | K    | 519.295931  | 260.151604      | 502.269382     | 251.638329       |                |                  | 4  |
| 14 | 1606.804625 | 803.905951      | 1589.778076    | 795.392676       | 1588.794060    | 794.900668       | P    | 391.200968  | 196.104122      | 374.174419     | 187.590848       |                |                  | 3  |
| 15 | 1753.840025 | 877.423651      | 1736.813476    | 868.910376       | 1735.829460    | 868.418368       | M    | 294.148204  | 147.577740      | 277.121655     | 139.064465       |                |                  | 2  |
| 16 |             |                 |                |                  |                |                  | K    | 147.112804  | 74.060040       | 130.086255     | 65.546765        |                |                  | 1  |

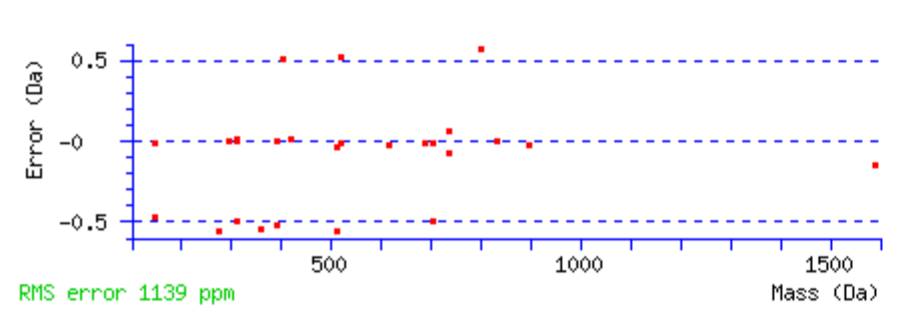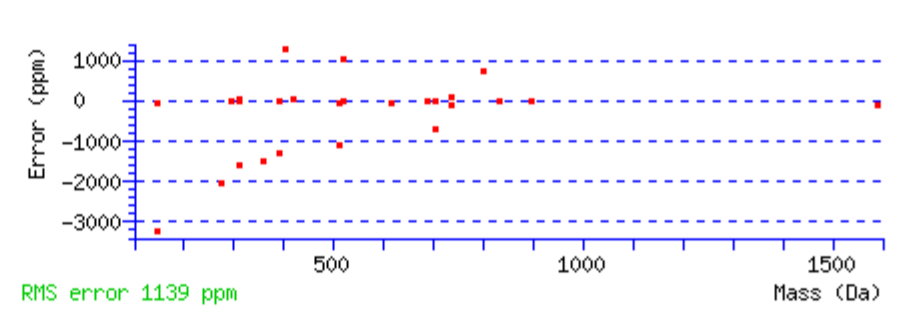

NCBI BLAST search of **MLNTNYHLPPSPKPMK**  
 (Parameters: blastp, nr protein database, expect=20000, no filter, PAM30)  
 Other BLAST [web gateways](#)

**All matches to this query**

| Score | Mr(calc):   | Delta     | Sequence                          |
|-------|-------------|-----------|-----------------------------------|
| 36.2  | 1898.938248 | 0.006048  | <a href="#">MLNTNYHLPPSPKPMK</a>  |
| 30.0  | 1898.938248 | 0.006048  | <a href="#">MLNTNYHLPPSPKPMK</a>  |
| 26.3  | 1898.938248 | 0.006048  | <a href="#">MLNTNYHLPPSPKPMK</a>  |
| 17.0  | 1898.938248 | 0.006048  | <a href="#">MLNTNYHLPPSPKPMK</a>  |
| 13.8  | 1898.938248 | 0.006048  | <a href="#">MLNTNYHLPPSPKPMK</a>  |
| 13.7  | 1898.938248 | 0.006048  | <a href="#">MLNTNYHLPPSPKPMK</a>  |
| 3.0   | 1898.938248 | 0.006048  | <a href="#">MLNTNYHLPPSPKPMK</a>  |
| 2.2   | 1898.949509 | -0.005213 | <a href="#">QQRPKVGCFSQMIFK</a>   |
| 1.8   | 1898.938248 | 0.006048  | <a href="#">MLNTNYHLPPSPKPMK</a>  |
| 1.8   | 1898.952164 | -0.007868 | <a href="#">GAIGLVPKAYIMEMYDI</a> |



# MASCOT Search Results

## Peptide View

MS/MS Fragmentation of **LITTQQWLIK**

Found in **ATP6\_HUMAN**, ATP synthase subunit a OS=Homo sapiens GN=MT-ATP6 PE=1 SV=1

Match to Query 32289: 1242.734468 from(622.374510,2+) rtinseconds(2939) index(39800)

Title: Locus:1.1.1.2520.27

Data file 2011-11-14 - TFD - EP 8-1.mgf

Click mouse within plot area to zoom in by factor of two about that point

Or, Plot from  to  Da

Label all possible matches  Label matches used for scoring

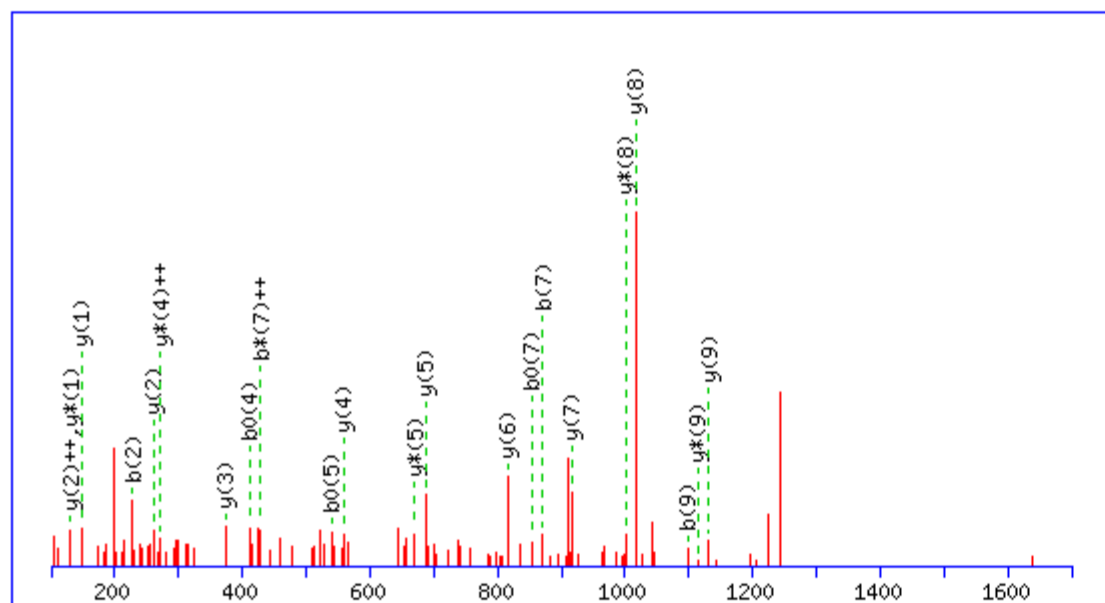

Monoisotopic mass of neutral peptide  $M_r(\text{calc})$ : 1242.733597

Fixed modifications: Propionamide (C) (apply to specified residues or termini only)

Ions Score: 66 Expect: 1.1e-006

Matches : 22/84 fragment ions using 35 most intense peaks [\(help\)](#)

| #  | b                  | b <sup>++</sup> | b <sup>+</sup> | b <sup>*++</sup>  | b <sup>0</sup>    | b <sup>0++</sup> | Seq. | y                  | y <sup>++</sup>   | y <sup>+</sup>     | y <sup>*++</sup>  | y <sup>0</sup> | y <sup>0++</sup> | #  |
|----|--------------------|-----------------|----------------|-------------------|-------------------|------------------|------|--------------------|-------------------|--------------------|-------------------|----------------|------------------|----|
| 1  | 114.091340         | 57.549308       |                |                   |                   |                  | L    |                    |                   |                    |                   |                |                  | 10 |
| 2  | <b>227.175404</b>  | 114.091340      |                |                   |                   |                  | I    | <b>1130.656823</b> | 565.832050        | <b>1113.630274</b> | 557.318775        | 1112.646258    | 556.826767       | 9  |
| 3  | 328.223083         | 164.615179      |                |                   | 310.212518        | 155.609897       | T    | <b>1017.572759</b> | 509.290018        | <b>1000.546210</b> | 500.776743        | 999.562194     | 500.284735       | 8  |
| 4  | 429.270762         | 215.139019      |                |                   | <b>411.260197</b> | 206.133737       | T    | <b>916.525080</b>  | 458.766178        | 899.498531         | 450.252904        | 898.514515     | 449.760896       | 7  |
| 5  | 557.329340         | 279.168308      | 540.302791     | 270.655034        | <b>539.318775</b> | 270.163026       | Q    | <b>815.477401</b>  | 408.242339        | 798.450852         | 399.729064        |                |                  | 6  |
| 6  | 685.387918         | 343.197597      | 668.361369     | 334.684323        | 667.377353        | 334.192315       | Q    | <b>687.418823</b>  | 344.213050        | <b>670.392274</b>  | 335.699775        |                |                  | 5  |
| 7  | <b>871.467231</b>  | 436.237254      | 854.440682     | <b>427.723979</b> | <b>853.456666</b> | 427.231971       | W    | <b>559.360245</b>  | 280.183761        | 542.333696         | <b>271.670486</b> |                |                  | 4  |
| 8  | 984.551295         | 492.779286      | 967.524746     | 484.266011        | 966.540730        | 483.774003       | L    | <b>373.280932</b>  | 187.144104        | 356.254383         | 178.630830        |                |                  | 3  |
| 9  | <b>1097.635359</b> | 549.321318      | 1080.608810    | 540.808043        | 1079.624794       | 540.316035       | I    | <b>260.196868</b>  | <b>130.602072</b> | 243.170319         | 122.088798        |                |                  | 2  |
| 10 |                    |                 |                |                   |                   |                  | K    | <b>147.112804</b>  | 74.060040         | <b>130.086255</b>  | 65.546765         |                |                  | 1  |

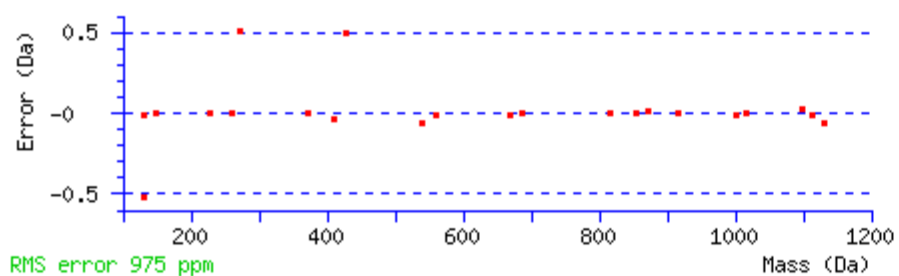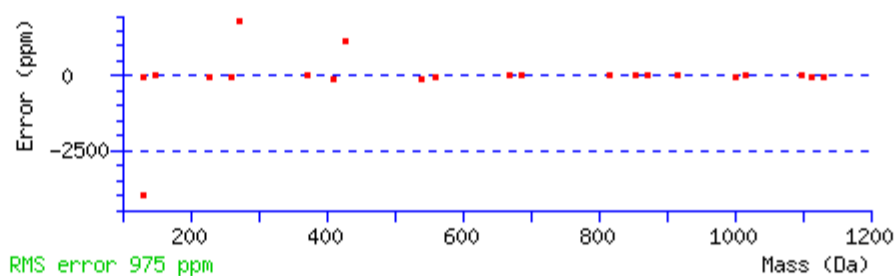

NCBI BLAST search of **LITTQQWLIK**

(Parameters: blastp, nr protein database, expect=20000, no filter, PAM30)

Other BLAST [web gateways](#)

## All matches to this query

| Score | $M_r(\text{calc})$ : | Delta     | Sequence                     |
|-------|----------------------|-----------|------------------------------|
| 65.5  | 1242.733597          | 0.000871  | <a href="#">LITTQQWLIK</a>   |
| 8.1   | 1242.727066          | 0.007402  | <a href="#">ILFIRMLHGK</a>   |
| 6.8   | 1242.733582          | 0.000886  | <a href="#">IIREIFPDIK</a>   |
| 4.8   | 1242.736954          | -0.002486 | <a href="#">AIPKQGMLLK</a>   |
| 4.5   | 1242.744812          | -0.010344 | <a href="#">IAILLDAHKK</a>   |
| 1.6   | 1242.729553          | 0.004915  | <a href="#">KSSAQGKPLALK</a> |
| 1.0   | 1242.733597          | 0.000871  | <a href="#">QLSALGFVIPAK</a> |

**MATRIX SCIENCE Mascot Search Results**

**Peptide View**

MS/MS Fragmentation of **LGELPSWILMR**

Found in **ATPK\_HUMAN**, ATP synthase subunit f, mitochondrial OS=Homo sapiens GN=ATP5J2 PE=1 SV=3

Match to Query 32783: 1329.710208 from(665.862380,2+) rtinseconds(3596) index(38246)

Title: Locus:1.1.1.2822.6

Data file 2011-11-13 - TFD - EP 7-7.mgf

Click mouse within plot area to zoom in by factor of two about that point

Or, Plot from  to  Da

Label all possible matches  Label matches used for scoring

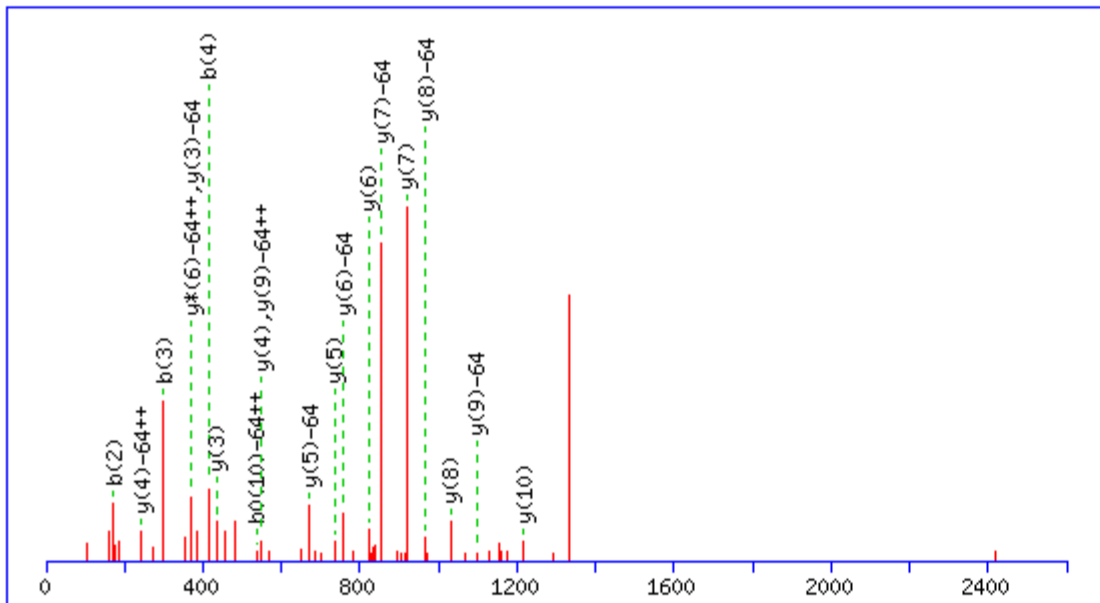

Monoisotopic mass of neutral peptide Mr(calc): 1329.711472

Fixed modifications: Propionamide (C) (apply to specified residues or termini only)

Variable modifications:

M10 : Oxidation (M), with neutral losses 0.000000 (shown in table), 63.998285

Ions Score: 55 Expect: 2e-005

Matches : 20/136 fragment ions using 24 most intense peaks [\(help\)](#)

| #  | b                 | b <sup>++</sup> | b <sup>0</sup> | b <sup>0++</sup> | Seq. | y                  | y <sup>++</sup> | y <sup>*</sup> | y <sup>*++</sup> | y <sup>0</sup> | y <sup>0++</sup> | #  |
|----|-------------------|-----------------|----------------|------------------|------|--------------------|-----------------|----------------|------------------|----------------|------------------|----|
| 1  | 114.091340        | 57.549308       |                |                  | L    |                    |                 |                |                  |                |                  | 11 |
| 2  | <b>171.112804</b> | 86.060040       |                |                  | G    | <b>1217.634706</b> | 609.320991      | 1200.608157    | 600.807717       | 1199.624141    | 600.315709       | 10 |
| 3  | <b>300.155397</b> | 150.581336      | 282.144832     | 141.576054       | E    | 1160.613242        | 580.810259      | 1143.586693    | 572.296985       | 1142.602677    | 571.804976       | 9  |
| 4  | <b>413.239461</b> | 207.123369      | 395.228896     | 198.118086       | L    | <b>1031.570649</b> | 516.288963      | 1014.544100    | 507.775688       | 1013.560084    | 507.283680       | 8  |
| 5  | 510.292225        | 255.649750      | 492.281660     | 246.644468       | P    | <b>918.486585</b>  | 459.746930      | 901.460036     | 451.233656       | 900.476020     | 450.741648       | 7  |
| 6  | 597.324253        | 299.165765      | 579.313688     | 290.160482       | S    | <b>821.433821</b>  | 411.220549      | 804.407272     | 402.707274       | 803.423256     | 402.215266       | 6  |
| 7  | 783.403566        | 392.205421      | 765.393001     | 383.200138       | W    | <b>734.401793</b>  | 367.704535      | 717.375244     | 359.191260       |                |                  | 5  |
| 8  | 896.487630        | 448.747453      | 878.477065     | 439.742170       | I    | <b>548.322480</b>  | 274.664878      | 531.295931     | 266.151604       |                |                  | 4  |
| 9  | 1009.571694       | 505.289485      | 991.561129     | 496.284202       | L    | <b>435.238416</b>  | 218.122846      | 418.211867     | 209.609571       |                |                  | 3  |
| 10 | 1156.607094       | 578.807185      | 1138.596529    | 569.801902       | M    | 322.154352         | 161.580814      | 305.127803     | 153.067539       |                |                  | 2  |
| 11 |                   |                 |                |                  | R    | 175.118952         | 88.063114       | 158.092403     | 79.549839        |                |                  | 1  |

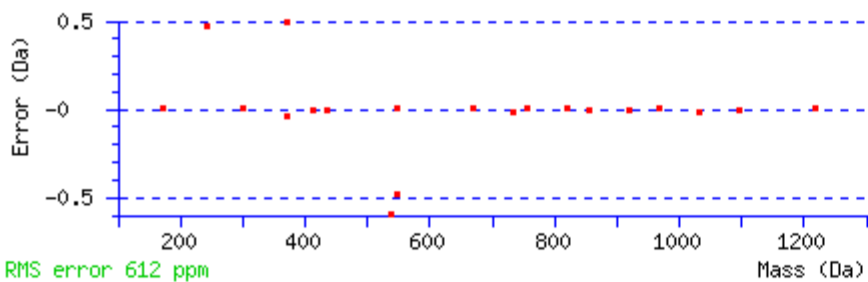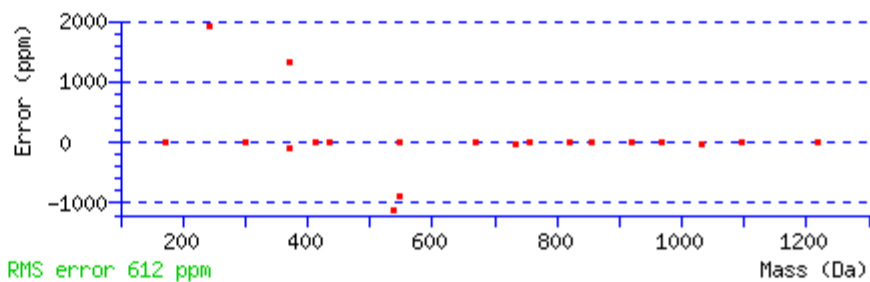

NCBI BLAST search of **LGELPSWILMR**

(Parameters: blastp, nr protein database, expect=20000, no filter, PAM30)

Other BLAST [web gateways](#)

All matches to this query

| Score | Mr(calc):   | Delta     | Sequence                     |
|-------|-------------|-----------|------------------------------|
| 55.5  | 1329.711472 | -0.001264 | <a href="#">LGELPSWILMR</a>  |
| 15.2  | 1329.711472 | -0.001264 | <a href="#">LGELPSWILMR</a>  |
| 5.2   | 1329.715332 | -0.005124 | <a href="#">VTAIHIDPATHR</a> |
| 4.4   | 1329.707458 | 0.002750  | <a href="#">LSVSNMVHTAKK</a> |
| 2.1   | 1329.707458 | 0.002750  | <a href="#">LLSVLNQMPQR</a>  |
| 1.2   | 1329.707474 | 0.002734  | <a href="#">GTPVNRVPIMAK</a> |

# MASCOT SCIENCE Mascot Search Results

## Peptide View

MS/MS Fragmentation of **YLLS<sup>0</sup>DLPGVR**

Found in **ATP5S\_HUMAN**, ATP synthase subunit s, mitochondrial OS=Homo sapiens GN=ATP5S PE=1 SV=3

Match to Query 32872: 1244.716688 from(623.365620,2+) rtinseconds(3495) index(46210)

Title: Locus:1.1.1.2602.21

Data file 2011-11-14 - TFD - EP 8-6.mgf

Click mouse within plot area to zoom in by factor of two about that point

Or, Plot from  to  Da

Label all possible matches  Label matches used for scoring

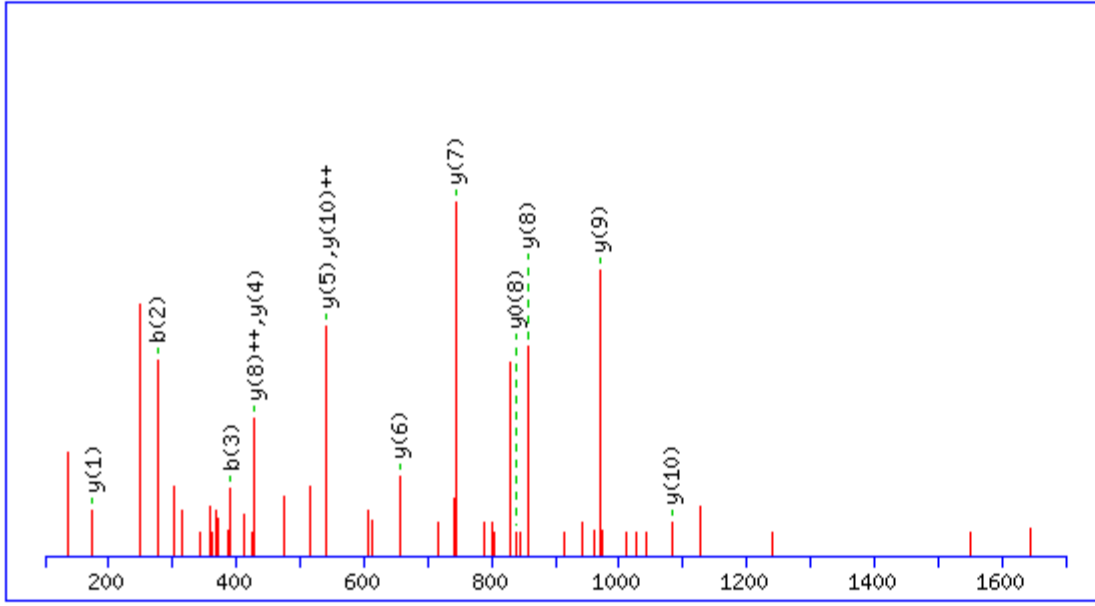

Monoisotopic mass of neutral peptide Mr(calc): 1244.712860

Fixed modifications: Propionamide (C) (apply to specified residues or termini only)

Ions Score: 57 Expect: 9e-006

Matches : 13/82 fragment ions using 21 most intense peaks [\(help\)](#)

| #  | b                 | b <sup>++</sup> | b <sup>0</sup> | b <sup>0++</sup> | Seq. | y                  | y <sup>++</sup>   | y <sup>*</sup> | y <sup>*++</sup> | y <sup>0</sup>    | y <sup>0++</sup> | #  |
|----|-------------------|-----------------|----------------|------------------|------|--------------------|-------------------|----------------|------------------|-------------------|------------------|----|
| 1  | 164.070605        | 82.538940       |                |                  | Y    |                    |                   |                |                  |                   |                  | 11 |
| 2  | <b>277.154669</b> | 139.080973      |                |                  | L    | <b>1082.656821</b> | <b>541.832049</b> | 1065.630272    | 533.318774       | 1064.646256       | 532.826766       | 10 |
| 3  | <b>390.238733</b> | 195.623005      |                |                  | L    | <b>969.572757</b>  | 485.290017        | 952.546208     | 476.776742       | 951.562192        | 476.284734       | 9  |
| 4  | 503.322797        | 252.165037      |                |                  | L    | <b>856.488693</b>  | <b>428.747985</b> | 839.462144     | 420.234710       | <b>838.478128</b> | 419.742702       | 8  |
| 5  | 590.354825        | 295.681051      | 572.344260     | 286.675768       | S    | <b>743.404629</b>  | 372.205953        | 726.378080     | 363.692678       | 725.394064        | 363.200670       | 7  |
| 6  | 705.381768        | 353.194522      | 687.371203     | 344.189240       | D    | <b>656.372601</b>  | 328.689939        | 639.346052     | 320.176664       | 638.362036        | 319.684656       | 6  |
| 7  | 818.465832        | 409.736554      | 800.455267     | 400.731272       | L    | <b>541.345658</b>  | 271.176467        | 524.319109     | 262.663193       |                   |                  | 5  |
| 8  | 915.518596        | 458.262936      | 897.508031     | 449.257654       | P    | <b>428.261594</b>  | 214.634435        | 411.235045     | 206.121160       |                   |                  | 4  |
| 9  | 972.540060        | 486.773668      | 954.529495     | 477.768386       | G    | 331.208830         | 166.108053        | 314.182281     | 157.594778       |                   |                  | 3  |
| 10 | 1071.608474       | 536.307875      | 1053.597909    | 527.302593       | V    | 274.187366         | 137.597321        | 257.160817     | 129.084046       |                   |                  | 2  |
| 11 |                   |                 |                |                  | R    | <b>175.118952</b>  | 88.063114         | 158.092403     | 79.549839        |                   |                  | 1  |

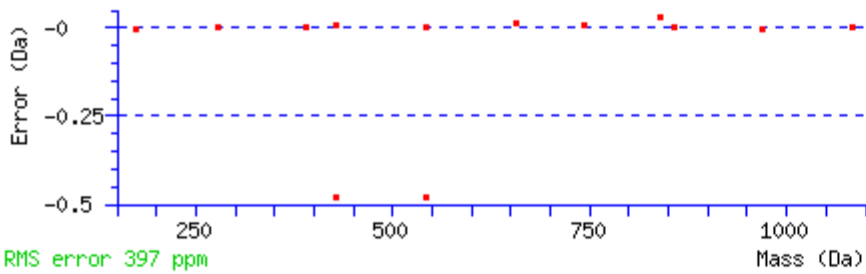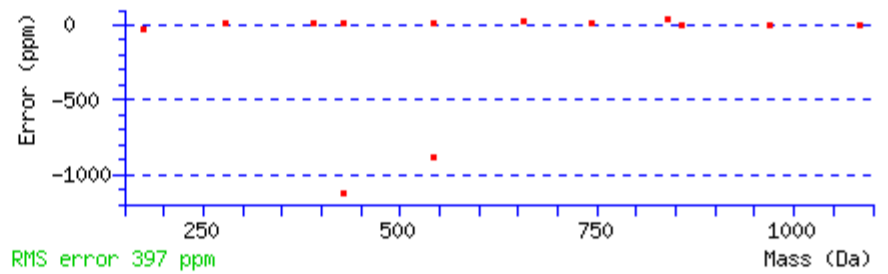

NCBI BLAST search of [YLLS<sup>0</sup>DLPGVR](#)

(Parameters: blastp, nr protein database, expect=20000, no filter, PAM30)

Other BLAST [web gateways](#)

## All matches to this query

| Score | Mr(calc):   | Delta     | Sequence                               |
|-------|-------------|-----------|----------------------------------------|
| 57.1  | 1244.712860 | 0.003828  | <a href="#">YLLS<sup>0</sup>DLPGVR</a> |
| 4.7   | 1244.716248 | 0.000440  | <a href="#">LVPGGKATLVMK</a>           |
| 4.4   | 1244.727463 | -0.010775 | <a href="#">VARMGLTKPLK</a>            |

# **MATRIX** SCIENCE Mascot Search Results

## Peptide View

MS/MS Fragmentation of **GVLLYGPPGCGK**

Found in **ATAD1\_HUMAN**, ATPase family AAA domain-containing protein 1 OS=Homo sapiens GN=ATAD1 PE=1 SV=1

Match to Query 33085: 1230.645788 from(616.330170,2+) rtinseconds(2264) index(27741)

Title: Locus:1.1.1.2248.36

Data file 2011-11-14 - TFD - EP 8-4.mgf

Click mouse within plot area to zoom in by factor of two about that point

Or, Plot from  to  Da

Label all possible matches  Label matches used for scoring

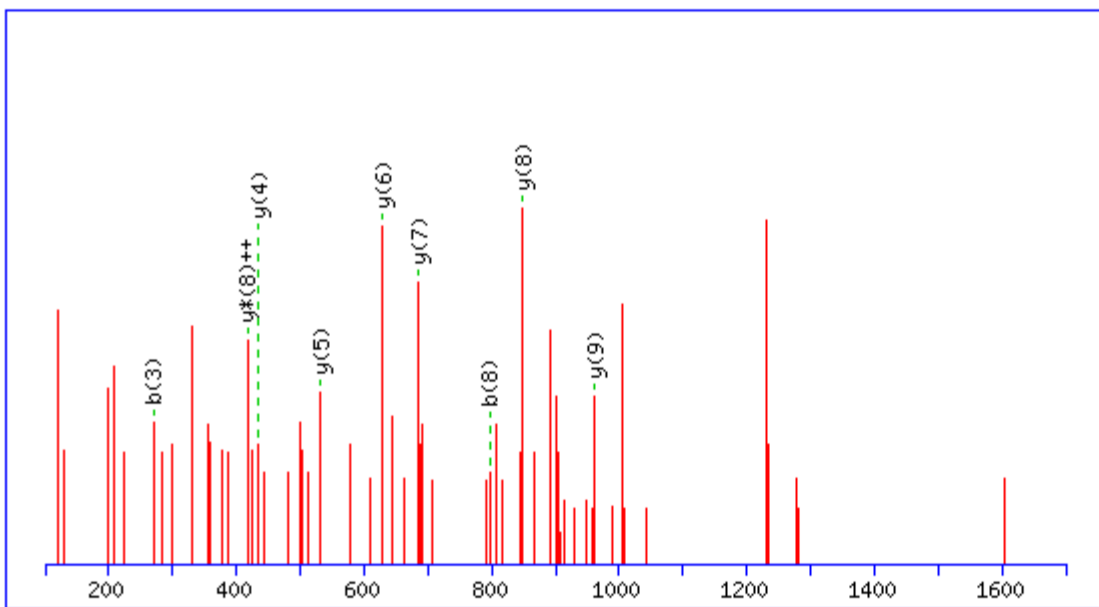

Monoisotopic mass of neutral peptide Mr(calc): 1230.643082

Fixed modifications: Propionamide (C) (apply to specified residues or termini only)

Ions Score: 30 Expect: 0.0026

Matches : 9/66 fragment ions using 19 most intense peaks [\(help\)](#)

| #  | b                 | b <sup>++</sup> | Seq. | y                 | y <sup>++</sup> | y <sup>*</sup> | y <sup>*++</sup>  | #  |
|----|-------------------|-----------------|------|-------------------|-----------------|----------------|-------------------|----|
| 1  | 58.028740         | 29.518008       | G    |                   |                 |                |                   | 12 |
| 2  | 157.097154        | 79.052215       | V    | 1174.628894       | 587.818085      | 1157.602345    | 579.304811        | 11 |
| 3  | <b>270.181218</b> | 135.594247      | L    | 1075.560480       | 538.283878      | 1058.533931    | 529.770604        | 10 |
| 4  | 383.265282        | 192.136279      | L    | <b>962.476416</b> | 481.741846      | 945.449867     | 473.228572        | 9  |
| 5  | 546.328611        | 273.667944      | Y    | <b>849.392352</b> | 425.199814      | 832.365803     | <b>416.686540</b> | 8  |
| 6  | 603.350075        | 302.178676      | G    | <b>686.329023</b> | 343.668150      | 669.302474     | 335.154875        | 7  |
| 7  | 700.402839        | 350.705058      | P    | <b>629.307559</b> | 315.157418      | 612.281010     | 306.644143        | 6  |
| 8  | <b>797.455603</b> | 399.231440      | P    | <b>532.254795</b> | 266.631036      | 515.228246     | 258.117761        | 5  |
| 9  | 854.477067        | 427.742172      | G    | <b>435.202031</b> | 218.104654      | 418.175482     | 209.591379        | 4  |
| 10 | 1028.523366       | 514.765321      | C    | 378.180567        | 189.593921      | 361.154018     | 181.080647        | 3  |
| 11 | 1085.544830       | 543.276053      | G    | 204.134268        | 102.570772      | 187.107719     | 94.057497         | 2  |
| 12 |                   |                 | K    | 147.112804        | 74.060040       | 130.086255     | 65.546765         | 1  |

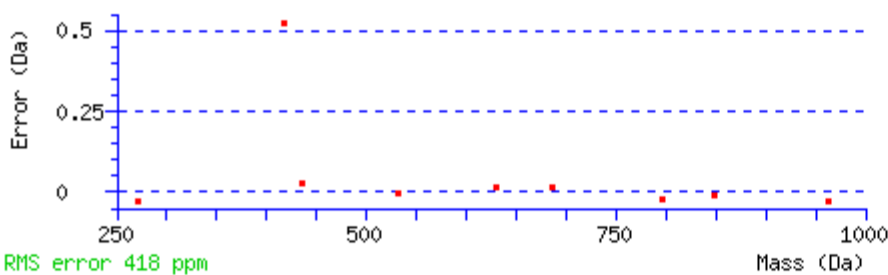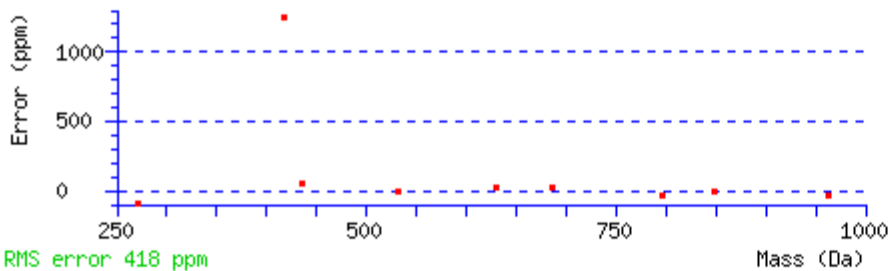

NCBI BLAST search of [GVLLYGPPGCGK](#)

(Parameters: blastp, nr protein database, expect=20000, no filter, PAM30)

Other BLAST [web gateways](#)

## All matches to this query

| Score | Mr(calc):   | Delta    | Sequence                     |
|-------|-------------|----------|------------------------------|
| 30.3  | 1230.643082 | 0.002706 | <a href="#">GVLLYGPPGCGK</a> |
| 2.6   | 1230.635681 | 0.010107 | <a href="#">RLPGPDELFR</a>   |
| 1.3   | 1230.645569 | 0.000219 | <a href="#">VLGVTSEELER</a>  |

# MASCOT Search Results

## Peptide View

MS/MS Fragmentation of **QTVLESIR**

Found in **ATD3A\_HUMAN**, ATPase family AAA domain-containing protein 3A OS=Homo sapiens GN=ATAD3A PE=1 SV=2

Match to Query 188109: 944.526048 from(473.270300,2+) rtinseconds(2025) index(755943)

Title: Locus:1.1.1.1116.13

Data file C:\Program Files (x86)\Matrix Science\Mascot Daemon\mgf3 TFD - Epitel - R2\mascot\_daemon\_merge.mgf

Click mouse within plot area to zoom in by factor of two about that point

Or, Plot from  to  Da

Label all possible matches  Label matches used for scoring

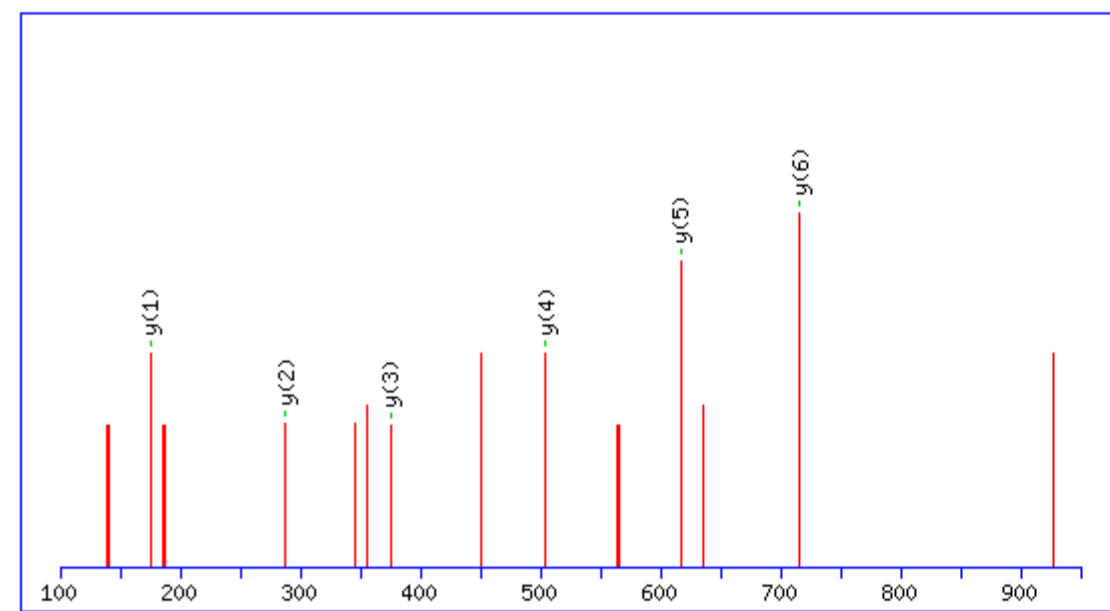

Monoisotopic mass of neutral peptide Mr(calc): 944.529083

Fixed modifications: Carbamidomethyl (C) (apply to specified residues or termini only)

Ions Score: 41 Expect: 0.0014

Matches : 6/78 fragment ions using 14 most intense peaks [\(help\)](#)

| # | b          | b <sup>++</sup> | b <sup>*</sup> | b <sup>***</sup> | b <sup>0</sup> | b <sup>0++</sup> | Seq. | y                 | y <sup>++</sup> | y <sup>*</sup> | y <sup>***</sup> | y <sup>0</sup> | y <sup>0++</sup> | # |
|---|------------|-----------------|----------------|------------------|----------------|------------------|------|-------------------|-----------------|----------------|------------------|----------------|------------------|---|
| 1 | 129.065854 | 65.036565       | 112.039305     | 56.523291        |                |                  | Q    |                   |                 |                |                  |                |                  | 8 |
| 2 | 230.113533 | 115.560405      | 213.086984     | 107.047130       | 212.102968     | 106.555122       | T    | 817.477794        | 409.242535      | 800.451245     | 400.729261       | 799.467229     | 400.237253       | 7 |
| 3 | 329.181947 | 165.094612      | 312.155398     | 156.581337       | 311.171382     | 156.089329       | V    | <b>716.430115</b> | 358.718696      | 699.403566     | 350.205421       | 698.419550     | 349.713413       | 6 |
| 4 | 442.266011 | 221.636644      | 425.239462     | 213.123369       | 424.255446     | 212.631361       | L    | <b>617.361701</b> | 309.184489      | 600.335152     | 300.671214       | 599.351136     | 300.179206       | 5 |
| 5 | 571.308604 | 286.157940      | 554.282055     | 277.644666       | 553.298039     | 277.152658       | E    | <b>504.277637</b> | 252.642456      | 487.251088     | 244.129182       | 486.267072     | 243.637174       | 4 |
| 6 | 658.340632 | 329.673954      | 641.314083     | 321.160680       | 640.330067     | 320.668672       | S    | <b>375.235044</b> | 188.121160      | 358.208495     | 179.607885       | 357.224479     | 179.115877       | 3 |
| 7 | 771.424696 | 386.215986      | 754.398147     | 377.702712       | 753.414131     | 377.210704       | I    | <b>288.203016</b> | 144.605146      | 271.176467     | 136.091871       |                |                  | 2 |
| 8 |            |                 |                |                  |                |                  | R    | <b>175.118952</b> | 88.063114       | 158.092403     | 79.549839        |                |                  | 1 |

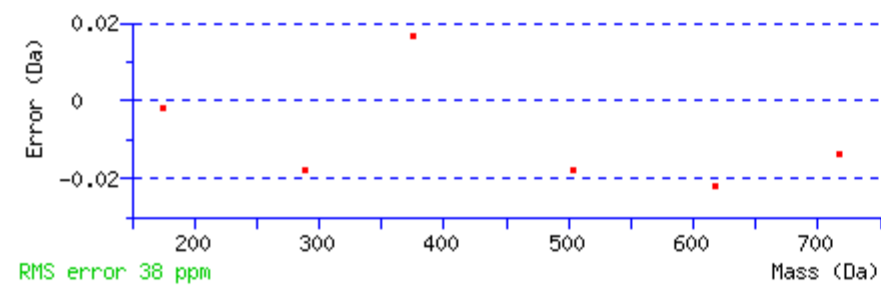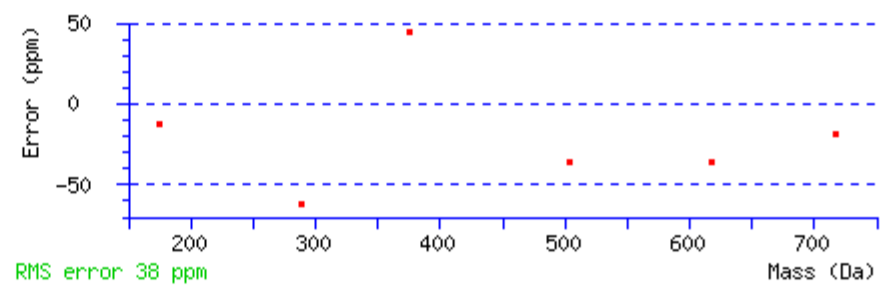

NCBI BLAST search of **QTVLESIR**

(Parameters: blastp, nr protein database, expect=20000, no filter, PAM30)

Other BLAST [web gateways](#)

## All matches to this query

| Score | Mr(calc):  | Delta     | Sequence                 |
|-------|------------|-----------|--------------------------|
| 41.2  | 944.529083 | -0.003035 | <a href="#">QTVLESIR</a> |
| 20.1  | 944.529083 | -0.003035 | <a href="#">SLKPTDLR</a> |
| 17.9  | 944.529053 | -0.003005 | <a href="#">EKLAESLR</a> |
| 15.3  | 944.529083 | -0.003035 | <a href="#">TKPSDIIR</a> |
| 15.0  | 944.529068 | -0.003020 | <a href="#">LTNSEIIR</a> |
| 9.7   | 944.529053 | -0.003005 | <a href="#">EKLASLER</a> |
| 9.7   | 944.529068 | -0.003020 | <a href="#">KIPSELR</a>  |
| 8.9   | 944.529099 | -0.003051 | <a href="#">QIVTTDLR</a> |
| 7.1   | 944.522552 | 0.003496  | <a href="#">IVCRELR</a>  |
| 7.1   | 944.519196 | 0.006852  | <a href="#">VWREVTR</a>  |

# MASCOT SCIENCE Mascot Search Results

## Peptide View

MS/MS Fragmentation of **EQLAALKK**

Found in **ATIF1\_HUMAN**, ATPase inhibitor, mitochondrial OS=Homo sapiens GN=ATPIF1 PE=1 SV=1

Match to Query 126418: 899.544008 from(450.779280,2+) rtinseconds(1063) index(577660)

Title: Locus:1.1.1.723.10

Data file C:\Program Files (x86)\Matrix Science\Mascot Daemon\mgf3 TFD - Epitel - R2\mascot\_daemon\_merge.mgf

Click mouse within plot area to zoom in by factor of two about that point

Or, Plot from  to  Da

Label all possible matches  Label matches used for scoring

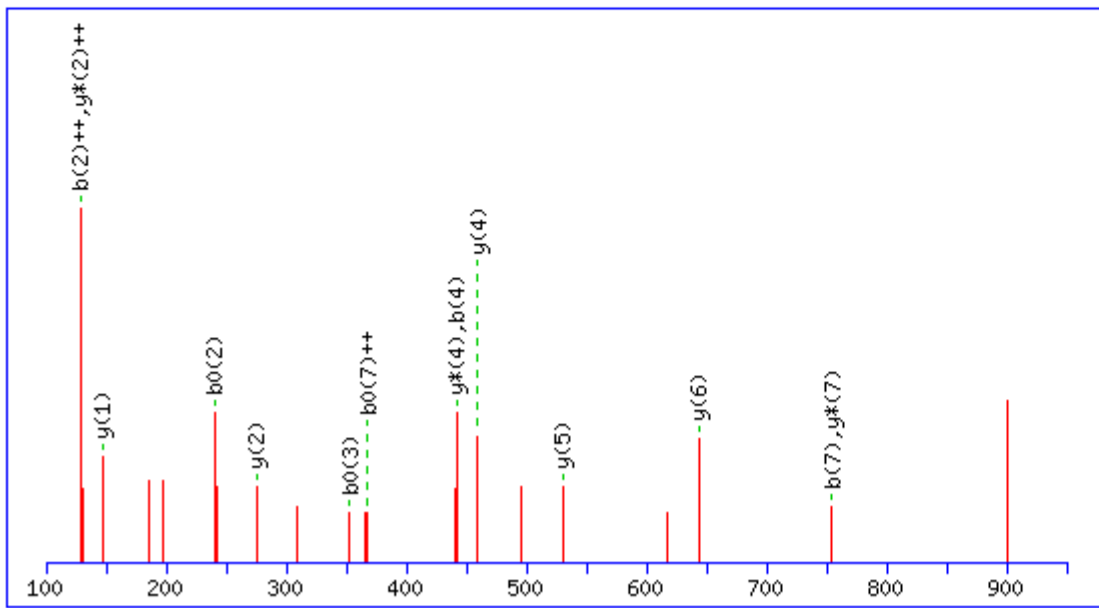

Monoisotopic mass of neutral peptide Mr(calc): 899.543976

Fixed modifications: Carbamidomethyl (C) (apply to specified residues or termini only)

Ions Score: 48 Expect: 9.7e-005

Matches : 14/68 fragment ions using 12 most intense peaks ([help](#))

| # | b          | b <sup>++</sup> | b <sup>*</sup> | b <sup>*++</sup> | b <sup>0</sup> | b <sup>0++</sup> | Seq. | y          | y <sup>++</sup> | y <sup>*</sup> | y <sup>*++</sup> | # |
|---|------------|-----------------|----------------|------------------|----------------|------------------|------|------------|-----------------|----------------|------------------|---|
| 1 | 130.049869 | 65.528572       |                |                  | 112.039304     | 56.523290        | E    |            |                 |                |                  | 8 |
| 2 | 258.108447 | 129.557862      | 241.081898     | 121.044587       | 240.097882     | 120.552579       | Q    | 771.508701 | 386.257989      | 754.482152     | 377.744714       | 7 |
| 3 | 371.192511 | 186.099894      | 354.165962     | 177.586619       | 353.181946     | 177.094611       | L    | 643.450123 | 322.228700      | 626.423574     | 313.715425       | 6 |
| 4 | 442.229625 | 221.618450      | 425.203076     | 213.105176       | 424.219060     | 212.613168       | A    | 530.366059 | 265.686668      | 513.339510     | 257.173393       | 5 |
| 5 | 513.266739 | 257.137008      | 496.240190     | 248.623733       | 495.256174     | 248.131725       | A    | 459.328945 | 230.168110      | 442.302396     | 221.654836       | 4 |
| 6 | 626.350803 | 313.679040      | 609.324254     | 305.165765       | 608.340238     | 304.673757       | L    | 388.291831 | 194.649554      | 371.265282     | 186.136279       | 3 |
| 7 | 754.445766 | 377.726521      | 737.419217     | 369.213247       | 736.435201     | 368.721239       | K    | 275.207767 | 138.107521      | 258.181218     | 129.594247       | 2 |
| 8 |            |                 |                |                  |                |                  | K    | 147.112804 | 74.060040       | 130.086255     | 65.546765        | 1 |

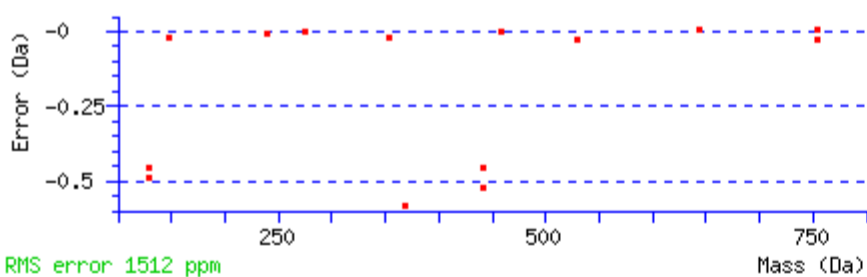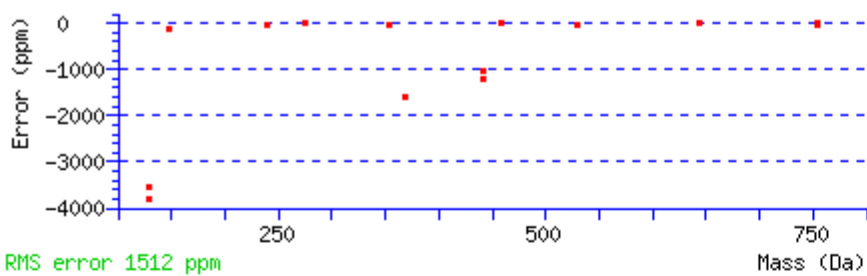

NCBI BLAST search of **EQLAALKK**

(Parameters: blastp, nr protein database, expect=20000, no filter, PAM30)

Other BLAST [web gateways](#)

## All matches to this query

| Score | Mr(calc):  | Delta    | Sequence                  |
|-------|------------|----------|---------------------------|
| 48.1  | 899.543976 | 0.000032 | <a href="#">EQLAALKK</a>  |
| 22.7  | 899.543976 | 0.000032 | <a href="#">QIEAKALK</a>  |
| 22.1  | 899.543976 | 0.000032 | <a href="#">QEALAKLK</a>  |
| 19.5  | 899.544006 | 0.000002 | <a href="#">KPKATPVK</a>  |
| 15.3  | 899.544006 | 0.000002 | <a href="#">VAVATPAKK</a> |
| 12.6  | 899.544006 | 0.000002 | <a href="#">ALVATPGKK</a> |
| 11.5  | 899.544006 | 0.000002 | <a href="#">LLGDVQKK</a>  |
| 11.3  | 899.543976 | 0.000032 | <a href="#">KIALEAQK</a>  |
| 8.3   | 899.543976 | 0.000032 | <a href="#">IALEAQKK</a>  |
| 8.2   | 899.543976 | 0.000032 | <a href="#">KEIEILR</a>   |

**Peptide View**

MS/MS Fragmentation of **APGILLDEATSALDTSNER**

Found in **ABCB6\_HUMAN**, ATP-binding cassette sub-family B member 6, mitochondrial OS=Homo sapiens GN=ABCB6 PE=1 SV=1

Match to Query 60891: 2085.064932 from(696.028920,3+) rtinseconds(3940) index(55495)

Title: Locus:1.1.1.3039.22

Data file 2011-11-12 - TFD - EP 5-1.mgf

Click mouse within plot area to zoom in by factor of two about that point

Or, Plot from  to  Da

Label all possible matches  Label matches used for scoring

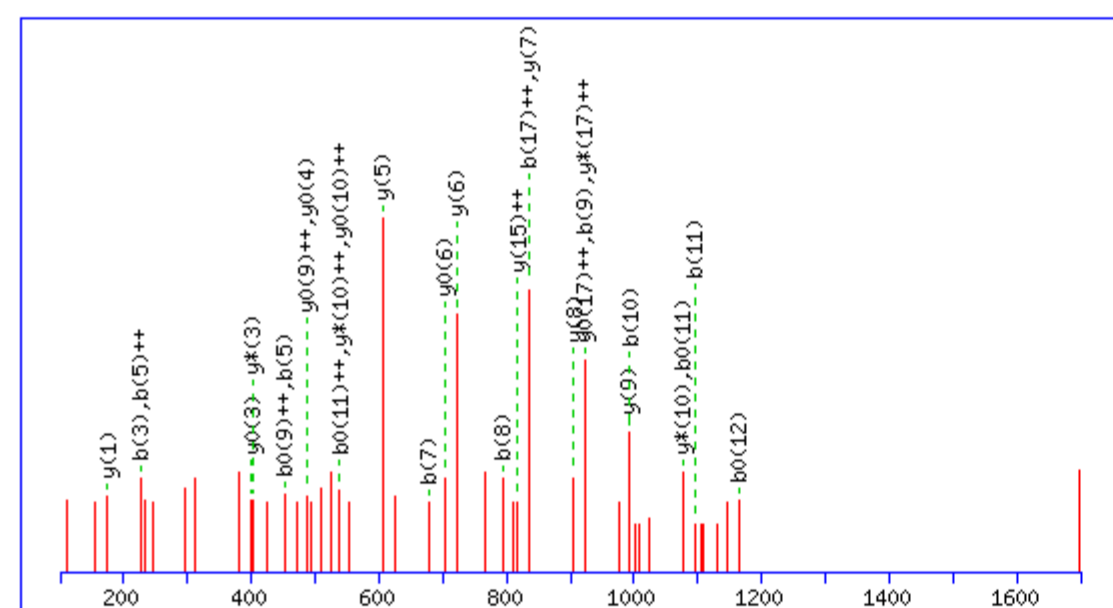

Monoisotopic mass of neutral peptide Mr(calc): 2085.058945

Fixed modifications: Propionamide (C) (apply to specified residues or termini only)

Ions Score: 44 Expect: 0.00037

Matches : 30/178 fragment ions using 40 most intense peaks [\(help\)](#)

| #  | b                  | b <sup>++</sup>   | b <sup>*</sup> | b <sup>*+</sup> | b <sup>0</sup>     | b <sup>0+</sup>   | Seq. | y                 | y <sup>++</sup>   | y <sup>*</sup>     | y <sup>*+</sup>   | y <sup>0</sup>    | y <sup>0+</sup>   | #  |
|----|--------------------|-------------------|----------------|-----------------|--------------------|-------------------|------|-------------------|-------------------|--------------------|-------------------|-------------------|-------------------|----|
| 1  | 72.044390          | 36.525833         |                |                 |                    |                   | A    |                   |                   |                    |                   |                   |                   | 20 |
| 2  | 169.097154         | 85.052215         |                |                 |                    |                   | P    | 2015.029141       | 1008.018209       | 1998.002592        | 999.504934        | 1997.018576       | 999.012926        | 19 |
| 3  | <b>226.118618</b>  | 113.562947        |                |                 |                    |                   | G    | 1917.976377       | 959.491827        | 1900.949828        | 950.978552        | 1899.965812       | 950.486544        | 18 |
| 4  | 339.202682         | 170.104979        |                |                 |                    |                   | I    | 1860.954913       | 930.981095        | 1843.928364        | <b>922.467820</b> | 1842.944348       | <b>921.975812</b> | 17 |
| 5  | <b>452.286746</b>  | <b>226.647011</b> |                |                 |                    |                   | I    | 1747.870849       | 874.439062        | 1730.844300        | 865.925788        | 1729.860284       | 865.433780        | 16 |
| 6  | 565.370810         | 283.189043        |                |                 |                    |                   | L    | 1634.786785       | <b>817.897031</b> | 1617.760236        | 809.383756        | 1616.776220       | 808.891748        | 15 |
| 7  | <b>678.454874</b>  | 339.731075        |                |                 |                    |                   | L    | 1521.702721       | 761.354998        | 1504.676172        | 752.841724        | 1503.692156       | 752.349716        | 14 |
| 8  | <b>793.481817</b>  | 397.244547        |                |                 | 775.471252         | 388.239264        | D    | 1408.618657       | 704.812967        | 1391.592108        | 696.299692        | 1390.608092       | 695.807684        | 13 |
| 9  | <b>922.524410</b>  | 461.765843        |                |                 | 904.513845         | <b>452.760561</b> | E    | 1293.591714       | 647.299495        | 1276.565165        | 638.786221        | 1275.581149       | 638.294212        | 12 |
| 10 | <b>993.561524</b>  | 497.284400        |                |                 | 975.550959         | 488.279117        | A    | 1164.549121       | 582.778199        | 1147.522572        | 574.264924        | 1146.538556       | 573.772916        | 11 |
| 11 | <b>1094.609203</b> | 547.808240        |                |                 | <b>1076.598638</b> | <b>538.802957</b> | T    | 1093.512007       | 547.259642        | <b>1076.485458</b> | <b>538.746367</b> | 1075.501442       | <b>538.254359</b> | 10 |
| 12 | 1181.641231        | 591.324254        |                |                 | <b>1163.630666</b> | 582.318971        | S    | <b>992.464328</b> | 496.735802        | 975.437779         | 488.222528        | 974.453763        | <b>487.730520</b> | 9  |
| 13 | 1252.678345        | 626.842811        |                |                 | 1234.667780        | 617.837528        | A    | <b>905.432300</b> | 453.219788        | 888.405751         | 444.706513        | 887.421735        | 444.214505        | 8  |
| 14 | 1365.762409        | 683.384842        |                |                 | 1347.751844        | 674.379560        | L    | <b>834.395186</b> | 417.701231        | 817.368637         | 409.187956        | 816.384621        | 408.695948        | 7  |
| 15 | 1480.789352        | 740.898314        |                |                 | 1462.778787        | 731.893032        | D    | <b>721.311122</b> | 361.159199        | 704.284573         | 352.645925        | <b>703.300557</b> | 352.153917        | 6  |
| 16 | 1581.837031        | 791.422154        |                |                 | 1563.826466        | 782.416871        | T    | <b>606.284179</b> | 303.645728        | 589.257630         | 295.132453        | 588.273614        | 294.640445        | 5  |
| 17 | 1668.869059        | <b>834.938168</b> |                |                 | 1650.858494        | 825.932885        | S    | 505.236500        | 253.121888        | 488.209951         | 244.608613        | <b>487.225935</b> | 244.116605        | 4  |
| 18 | 1782.911986        | 891.959631        | 1765.885437    | 883.446357      | 1764.901421        | 882.954349        | N    | 418.204472        | 209.605874        | <b>401.177923</b>  | 201.092599        | <b>400.193907</b> | 200.600591        | 3  |
| 19 | 1911.954579        | 956.480928        | 1894.928030    | 947.967653      | 1893.944014        | 947.475645        | E    | 304.161545        | 152.584410        | 287.134996         | 144.071136        | 286.150980        | 143.579128        | 2  |
| 20 |                    |                   |                |                 |                    |                   | R    | <b>175.118952</b> | 88.063114         | 158.092403         | 79.549839         |                   |                   | 1  |

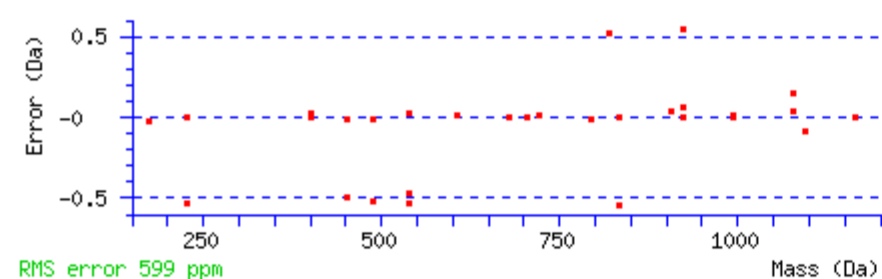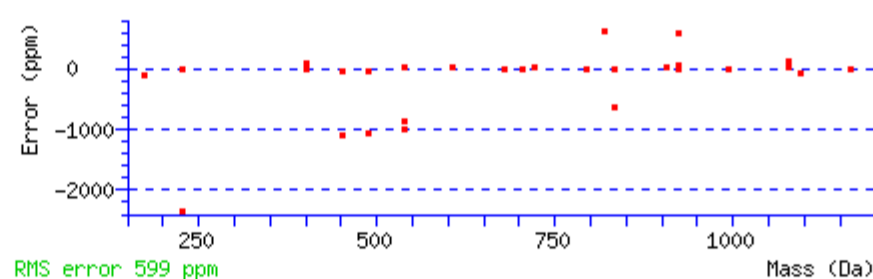

NCBI BLAST search of [APGILLDEATSALDTSNER](#)

(Parameters: blastp, nr protein database, expect=20000, no filter, PAM30)

Other BLAST [web gateways](#)

**All matches to this query**

| Score | Mr(calc):   | Delta     | Sequence                            |
|-------|-------------|-----------|-------------------------------------|
| 44.2  | 2085.058945 | 0.005987  | <a href="#">APGILLDEATSALDTSNER</a> |
| 7.2   | 2085.081604 | -0.016672 | <a href="#">IVALMDTYSPSLPKSLYR</a>  |
| 2.9   | 2085.081604 | -0.016672 | <a href="#">IVALMDTYSPSLPKSLYR</a>  |
| 0.7   | 2085.060272 | 0.004660  | <a href="#">IQLPDLENQRNFNELSR</a>   |

# **MATRIX** SCIENCE Mascot Search Results

## Peptide View

### MS/MS Fragmentation of **LVEPMAGR**

Found in **ABCCB\_HUMAN**, ATP-binding cassette sub-family C member 11 OS=Homo sapiens GN=ABCC11 PE=1 SV=1

Match to Query 7135: 887.461068 from(444.737810,2+) rtinseconds(1379) index(10160)

Title: Locus:1.1.1.1921.8

Data file 2011-11-12 - TFD - EP 6-2.mgf

Click mouse within plot area to zoom in by factor of two about that point

Or, Plot from  to  Da

Label all possible matches  Label matches used for scoring

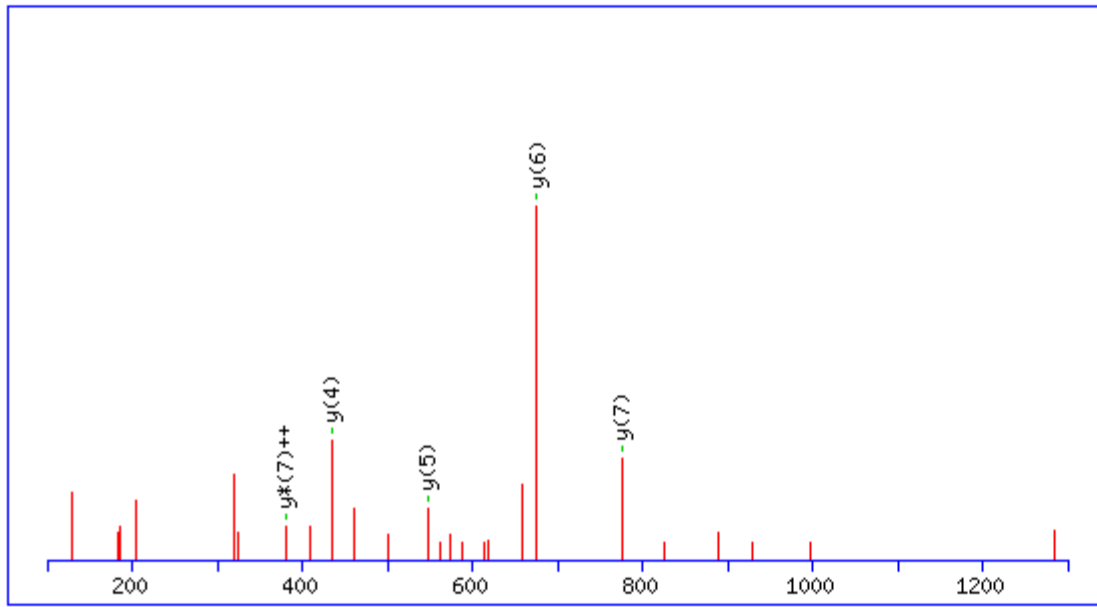

Monoisotopic mass of neutral peptide Mr(calc): 887.453476

Fixed modifications: Propionamide (C) (apply to specified residues or termini only)

Variable modifications:

P4 : Oxidation (P)

Ions Score: 32 Expect: 0.0078

Matches : 5/56 fragment ions using 7 most intense peaks ([help](#))

| # | b          | b <sup>++</sup> | b <sup>0</sup> | b <sup>0++</sup> | Seq. | y          | y <sup>++</sup> | y <sup>*</sup> | y <sup>*++</sup> | y <sup>0</sup> | y <sup>0++</sup> | # |
|---|------------|-----------------|----------------|------------------|------|------------|-----------------|----------------|------------------|----------------|------------------|---|
| 1 | 114.091340 | 57.549308       |                |                  | L    |            |                 |                |                  |                |                  | 8 |
| 2 | 213.159754 | 107.083515      |                |                  | V    | 775.376701 | 388.191989      | 758.350152     | 379.678714       | 757.366136     | 379.186706       | 7 |
| 3 | 342.202347 | 171.604811      | 324.191782     | 162.599529       | E    | 676.308287 | 338.657782      | 659.281738     | 330.144507       | 658.297722     | 329.652499       | 6 |
| 4 | 455.250026 | 228.128651      | 437.239461     | 219.123369       | P    | 547.265694 | 274.136485      | 530.239145     | 265.623211       |                |                  | 5 |
| 5 | 586.290511 | 293.648894      | 568.279946     | 284.643611       | M    | 434.218015 | 217.612645      | 417.191466     | 209.099371       |                |                  | 4 |
| 6 | 657.327625 | 329.167451      | 639.317060     | 320.162168       | A    | 303.177530 | 152.092403      | 286.150981     | 143.579128       |                |                  | 3 |
| 7 | 714.349089 | 357.678183      | 696.338524     | 348.672900       | G    | 232.140416 | 116.573846      | 215.113867     | 108.060571       |                |                  | 2 |
| 8 |            |                 |                |                  | R    | 175.118952 | 88.063114       | 158.092403     | 79.549839        |                |                  | 1 |

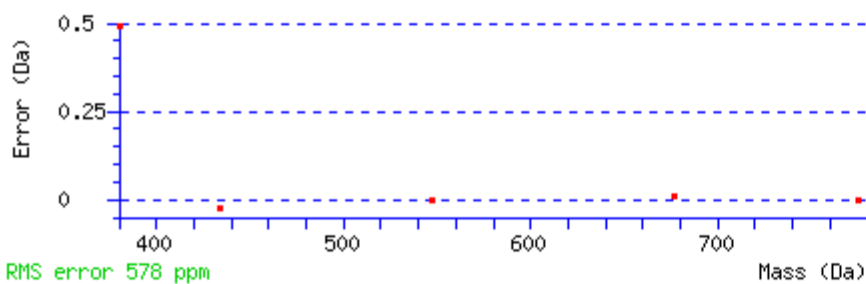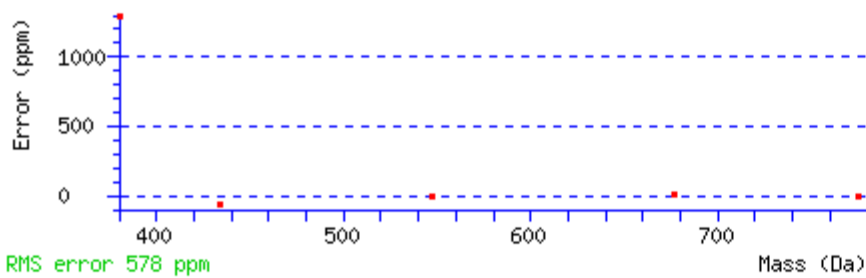

### NCBI BLAST search of **LVEPMAGR**

(Parameters: blastp, nr protein database, expect=20000, no filter, PAM30)

Other BLAST [web gateways](#)

### All matches to this query

| Score | Mr(calc):  | Delta     | Sequence                 |
|-------|------------|-----------|--------------------------|
| 31.7  | 887.453476 | 0.007592  | <a href="#">LVEPMAGR</a> |
| 17.5  | 887.453476 | 0.007592  | <a href="#">LVEPMAGR</a> |
| 6.3   | 887.461334 | -0.000266 | <a href="#">IYHRDGK</a>  |
| 3.1   | 887.464706 | -0.003638 | <a href="#">QLLQCGR</a>  |



# MASCOT SCIENCE Mascot Search Results

## Peptide View

MS/MS Fragmentation of **LLLGDLAPVR**

Found in **ABCF3\_HUMAN**, ATP-binding cassette sub-family F member 3 OS=Homo sapiens GN=ABCF3 PE=1 SV=2

Match to Query 21285: 1065.653428 from(533.833990,2+) rtinseconds(3023) index(40918)

Title: Locus:1.1.1.2638.8

Data file 2011-11-10 - TFD - EP 4-2.mgf

Click mouse within plot area to zoom in by factor of two about that point

Or, Plot from  to  Da

Label all possible matches  Label matches used for scoring

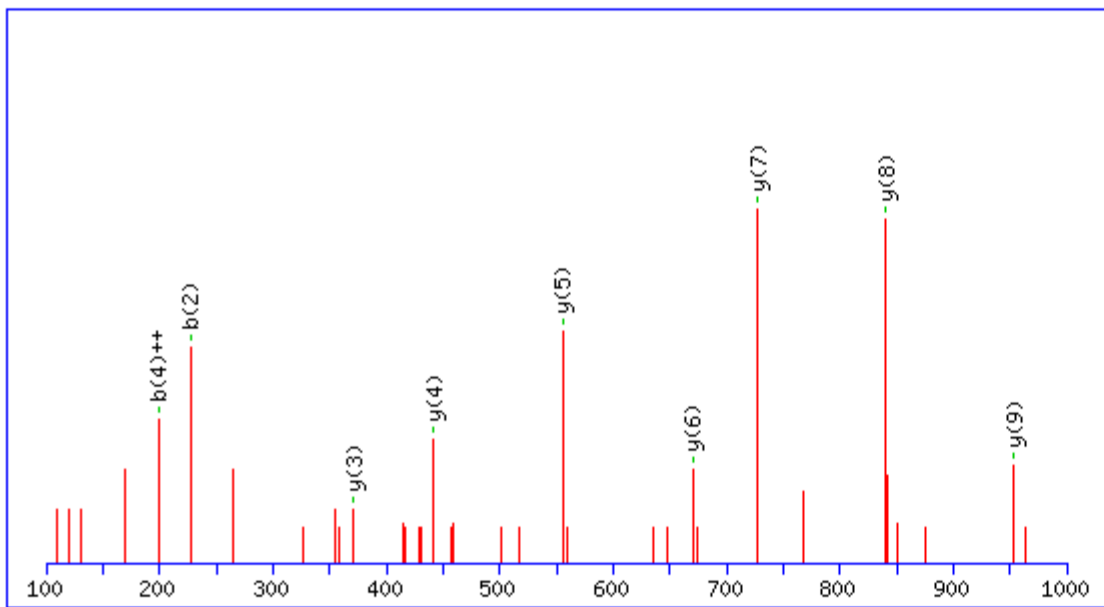

Monoisotopic mass of neutral peptide Mr(calc): 1065.654617

Fixed modifications: Propionamide (C) (apply to specified residues or termini only)

Ions Score: 67 Expect: 2.4e-007

Matches : 9/72 fragment ions using 9 most intense peaks ([help](#))

| #  | b          | b <sup>++</sup> | b <sup>0</sup> | b <sup>0++</sup> | Seq. | y          | y <sup>++</sup> | y <sup>*</sup> | y <sup>*++</sup> | y <sup>0</sup> | y <sup>0++</sup> | #  |
|----|------------|-----------------|----------------|------------------|------|------------|-----------------|----------------|------------------|----------------|------------------|----|
| 1  | 114.091340 | 57.549308       |                |                  | L    |            |                 |                |                  |                |                  | 10 |
| 2  | 227.175404 | 114.091340      |                |                  | L    | 953.577843 | 477.292559      | 936.551294     | 468.779285       | 935.567278     | 468.287277       | 9  |
| 3  | 340.259468 | 170.633372      |                |                  | L    | 840.493779 | 420.750527      | 823.467230     | 412.237253       | 822.483214     | 411.745245       | 8  |
| 4  | 397.280932 | 199.144104      |                |                  | G    | 727.409715 | 364.208496      | 710.383166     | 355.695221       | 709.399150     | 355.203213       | 7  |
| 5  | 512.307875 | 256.657576      | 494.297310     | 247.652293       | D    | 670.388251 | 335.697764      | 653.361702     | 327.184489       | 652.377686     | 326.692481       | 6  |
| 6  | 625.391939 | 313.199608      | 607.381374     | 304.194325       | L    | 555.361308 | 278.184292      | 538.334759     | 269.671018       |                |                  | 5  |
| 7  | 696.429053 | 348.718165      | 678.418488     | 339.712882       | A    | 442.277244 | 221.642260      | 425.250695     | 213.128985       |                |                  | 4  |
| 8  | 793.481817 | 397.244547      | 775.471252     | 388.239264       | P    | 371.240130 | 186.123703      | 354.213581     | 177.610428       |                |                  | 3  |
| 9  | 892.550231 | 446.778753      | 874.539666     | 437.773471       | V    | 274.187366 | 137.597321      | 257.160817     | 129.084046       |                |                  | 2  |
| 10 |            |                 |                |                  | R    | 175.118952 | 88.063114       | 158.092403     | 79.549839        |                |                  | 1  |

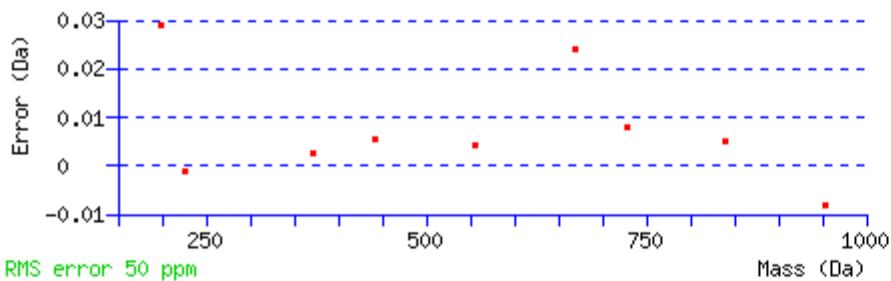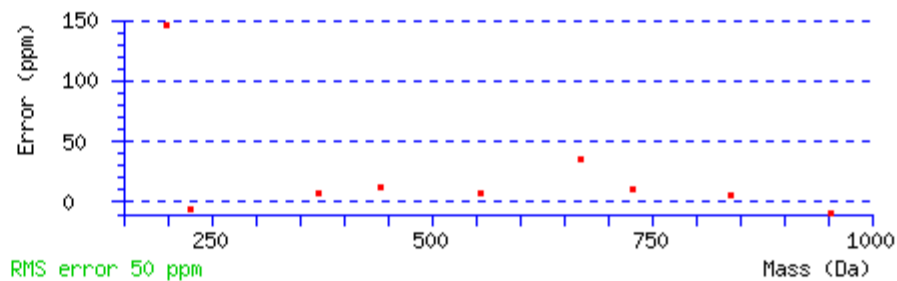

NCBI BLAST search of [LLLGDLAPVR](#)

(Parameters: blastp, nr protein database, expect=20000, no filter, PAM30)

Other BLAST [web gateways](#)

## All matches to this query

| Score | Mr(calc):   | Delta     | Sequence                   |
|-------|-------------|-----------|----------------------------|
| 66.5  | 1065.654617 | -0.001189 | <a href="#">LLLGDLAPVR</a> |
| 10.1  | 1065.643387 | 0.010041  | <a href="#">ILPTPPATLK</a> |
| 0.8   | 1065.654617 | -0.001189 | <a href="#">EPLVIQVLR</a>  |
| 0.6   | 1065.643387 | 0.010041  | <a href="#">IGLLPLLNPT</a> |

Mascot: <http://www.matrixscience.com/>

# MASCOT SCIENCE Mascot Search Results

## Peptide View

MS/MS Fragmentation of **VVVVAGETGSGK**

Found in **DHX29\_HUMAN**, ATP-dependent RNA helicase DHX29 OS=Homo sapiens GN=DHX29 PE=1 SV=2

Match to Query 20347: 1101.596648 from(551.805600,2+) rtinseconds(1156) index(3762)

Title: Locus:1.1.1.2004.39

Data file 2011-11-12 - TFD - EP 5-1.mgf

Click mouse within plot area to zoom in by factor of two about that point

Or, Plot from  to  Da

Label all possible matches  Label matches used for scoring

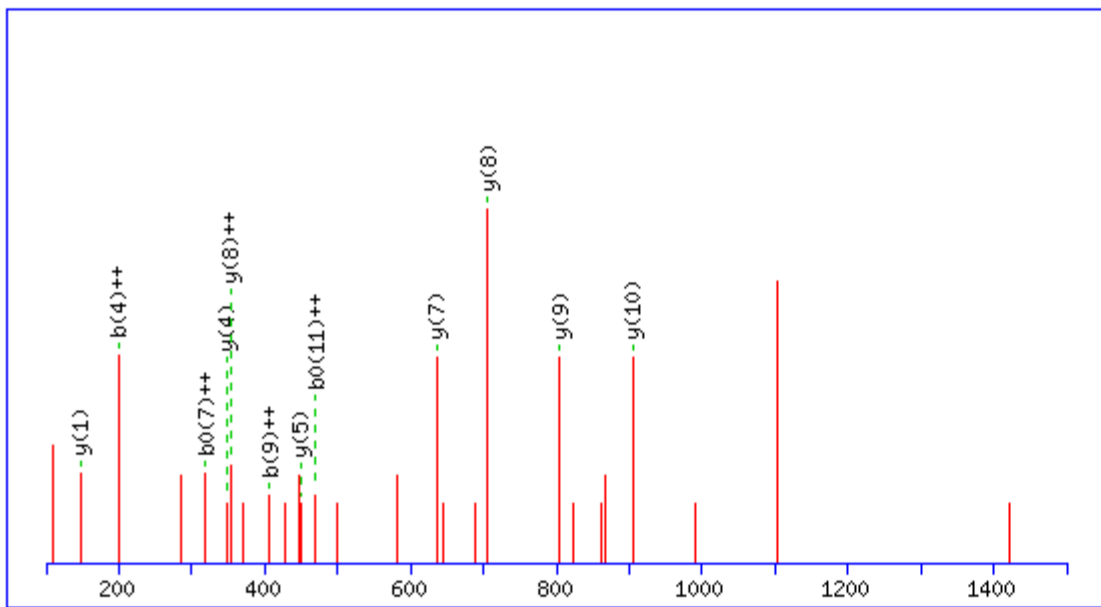

Monoisotopic mass of neutral peptide Mr(calc): 1101.603012

Fixed modifications: Propionamide (C) (apply to specified residues or termini only)

Ions Score: 37 Expect: 0.0019

Matches : 13/94 fragment ions using 23 most intense peaks ([help](#))

| #  | b          | b <sup>++</sup> | b <sup>0</sup> | b <sup>0++</sup> | Seq. | y           | y <sup>++</sup> | y <sup>*</sup> | y <sup>*++</sup> | y <sup>0</sup> | y <sup>0++</sup> | #  |
|----|------------|-----------------|----------------|------------------|------|-------------|-----------------|----------------|------------------|----------------|------------------|----|
| 1  | 100.075690 | 50.541483       |                |                  | V    |             |                 |                |                  |                |                  | 12 |
| 2  | 199.144104 | 100.075690      |                |                  | V    | 1003.541852 | 502.274564      | 986.515303     | 493.761290       | 985.531287     | 493.269282       | 11 |
| 3  | 298.212518 | 149.609897      |                |                  | V    | 904.473438  | 452.740357      | 887.446889     | 444.227083       | 886.462873     | 443.735075       | 10 |
| 4  | 397.280932 | 199.144104      |                |                  | V    | 805.405024  | 403.206150      | 788.378475     | 394.692876       | 787.394459     | 394.200868       | 9  |
| 5  | 468.318046 | 234.662661      |                |                  | A    | 706.336610  | 353.671943      | 689.310061     | 345.158669       | 688.326045     | 344.666661       | 8  |
| 6  | 525.339510 | 263.173393      |                |                  | G    | 635.299496  | 318.153386      | 618.272947     | 309.640112       | 617.288931     | 309.148104       | 7  |
| 7  | 654.382103 | 327.694690      | 636.371538     | 318.689407       | E    | 578.278032  | 289.642654      | 561.251483     | 281.129380       | 560.267467     | 280.637372       | 6  |
| 8  | 755.429782 | 378.218529      | 737.419217     | 369.213247       | T    | 449.235439  | 225.121358      | 432.208890     | 216.608083       | 431.224874     | 216.116075       | 5  |
| 9  | 812.451246 | 406.729261      | 794.440681     | 397.723979       | G    | 348.187760  | 174.597518      | 331.161211     | 166.084244       | 330.177195     | 165.592236       | 4  |
| 10 | 899.483274 | 450.245275      | 881.472709     | 441.239993       | S    | 291.166296  | 146.086786      | 274.139747     | 137.573512       | 273.155731     | 137.081504       | 3  |
| 11 | 956.504738 | 478.756007      | 938.494173     | 469.750725       | G    | 204.134268  | 102.570772      | 187.107719     | 94.057498        |                |                  | 2  |
| 12 |            |                 |                |                  | K    | 147.112804  | 74.060040       | 130.086255     | 65.546766        |                |                  | 1  |

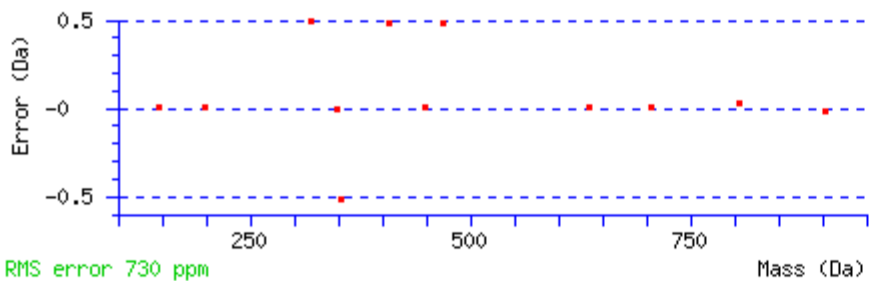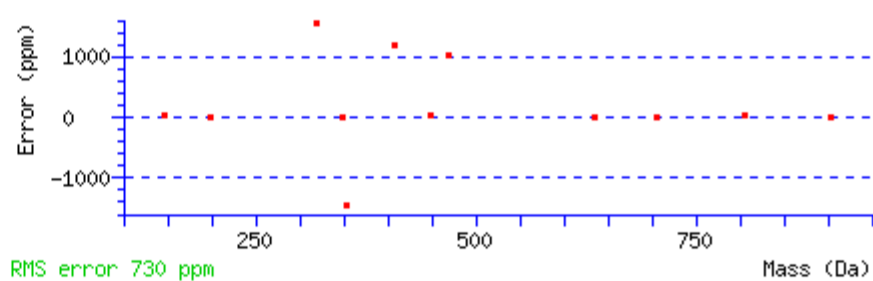

NCBI BLAST search of [VVVVAGETGSGK](#)

(Parameters: blastp, nr protein database, expect=20000, no filter, PAM30)

Other BLAST [web gateways](#)

## All matches to this query

| Score | Mr(calc):   | Delta     | Sequence                     |
|-------|-------------|-----------|------------------------------|
| 37.0  | 1101.603012 | -0.006364 | <a href="#">VVVVAGETGSGK</a> |
| 7.9   | 1101.606995 | -0.010347 | <a href="#">LEQPFLDLK</a>    |

Mascot: <http://www.matrixscience.com/>

# MASCOT SCIENCE Mascot Search Results

## Peptide View

### MS/MS Fragmentation of **VVSGLPGR**

Found in **ANPRB\_HUMAN**, Atrial natriuretic peptide receptor 2 OS=Homo sapiens GN=NPR2 PE=1 SV=1

Match to Query 1309: 799.456748 from(400.735650,2+) rtinseconds(1406) index(500978)

Title: Locus:1.1.1.863.2

Data file C:\Program Files (x86)\Matrix Science\Mascot Daemon\mgf3 TFD - Epitel - R2\mascot\_daemon\_merge.mgf

Click mouse within plot area to zoom in by factor of two about that point

Or, Plot from  to  Da

Label all possible matches  Label matches used for scoring

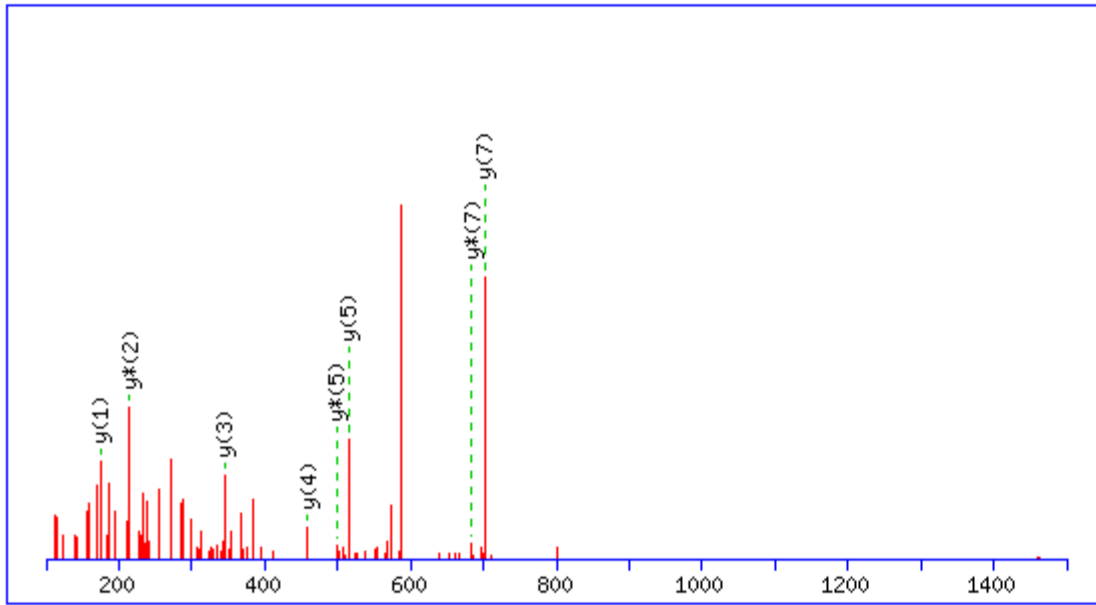

Monoisotopic mass of neutral peptide Mr(calc): 799.455215

Fixed modifications: Carbamidomethyl (C) (apply to specified residues or termini only)

Variable modifications:

P6 : Oxidation (P)

Ions Score: 37 Expect: 0.0027

Matches : 8/56 fragment ions using 12 most intense peaks [\(help\)](#)

| # | b          | b <sup>++</sup> | b <sup>0</sup> | b <sup>0++</sup> | Seq. | y                 | y <sup>++</sup> | y <sup>*</sup>    | y <sup>*++</sup> | y <sup>0</sup> | y <sup>0++</sup> | # |
|---|------------|-----------------|----------------|------------------|------|-------------------|-----------------|-------------------|------------------|----------------|------------------|---|
| 1 | 100.075690 | 50.541483       |                |                  | V    |                   |                 |                   |                  |                |                  | 8 |
| 2 | 199.144104 | 100.075690      |                |                  | V    | <b>701.394065</b> | 351.200671      | <b>684.367516</b> | 342.687396       | 683.383500     | 342.195388       | 7 |
| 3 | 286.176132 | 143.591704      | 268.165567     | 134.586422       | S    | 602.325651        | 301.666464      | 585.299102        | 293.153189       | 584.315086     | 292.661181       | 6 |
| 4 | 343.197596 | 172.102436      | 325.187031     | 163.097153       | G    | <b>515.293623</b> | 258.150450      | <b>498.267074</b> | 249.637175       |                |                  | 5 |
| 5 | 456.281660 | 228.644468      | 438.271095     | 219.639186       | L    | <b>458.272159</b> | 229.639717      | 441.245610        | 221.126443       |                |                  | 4 |
| 6 | 569.329339 | 285.168308      | 551.318774     | 276.163025       | P    | <b>345.188095</b> | 173.097685      | 328.161546        | 164.584411       |                |                  | 3 |
| 7 | 626.350803 | 313.679040      | 608.340238     | 304.673757       | G    | 232.140416        | 116.573846      | <b>215.113867</b> | 108.060571       |                |                  | 2 |
| 8 |            |                 |                |                  | R    | <b>175.118952</b> | 88.063114       | 158.092403        | 79.549839        |                |                  | 1 |

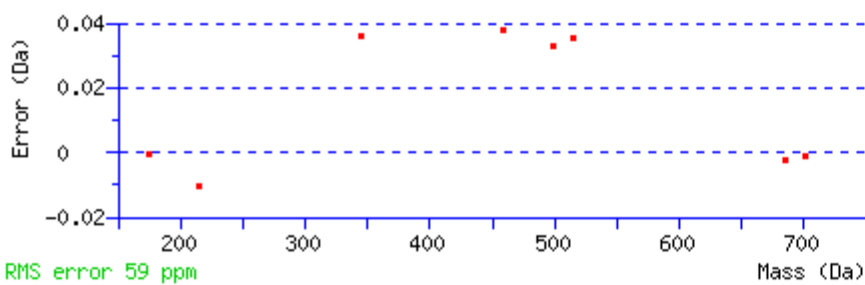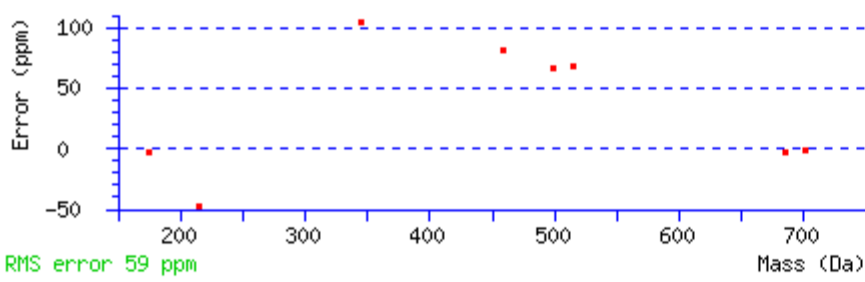

### NCBI BLAST search of **VVSGLPGR**

(Parameters: blastp, nr protein database, expect=20000, no filter, PAM30)

Other BLAST [web gateways](#)

### All matches to this query

| Score | Mr(calc):  | Delta    | Sequence                 |
|-------|------------|----------|--------------------------|
| 36.8  | 799.455215 | 0.001533 | <a href="#">VVSGLPGR</a> |
| 32.5  | 799.455200 | 0.001548 | <a href="#">TLKPPGR</a>  |
| 27.5  | 799.455185 | 0.001563 | <a href="#">VDAILNR</a>  |
| 20.0  | 799.455200 | 0.001548 | <a href="#">TPAVIQR</a>  |
| 17.2  | 799.455200 | 0.001548 | <a href="#">VLKDPGR</a>  |
| 16.3  | 799.455200 | 0.001548 | <a href="#">LTQVSPR</a>  |
| 15.9  | 799.455185 | 0.001563 | <a href="#">VDNLALR</a>  |
| 15.2  | 799.455200 | 0.001548 | <a href="#">VADLVAGR</a> |
| 14.9  | 799.455185 | 0.001563 | <a href="#">AALSPLGR</a> |
| 14.9  | 799.455185 | 0.001563 | <a href="#">DLNILGR</a>  |

# **MASCOT** Mascot Search Results

## Peptide View

MS/MS Fragmentation of **LSDGDMTSALR**

Found in **ATRIP\_HUMAN**, ATR-interacting protein OS=Homo sapiens GN=ATRIP PE=1 SV=1

Match to Query 26552: 1164.551208 from(583.282880,2+) rtinseconds(2192) index(26660)

Title: Locus:1.1.1.2162.31

Data file 2011-11-10 - TFD - EP 4-4.mgf

Click mouse within plot area to zoom in by factor of two about that point

Or,   to  Da

Label all possible matches  Label matches used for scoring

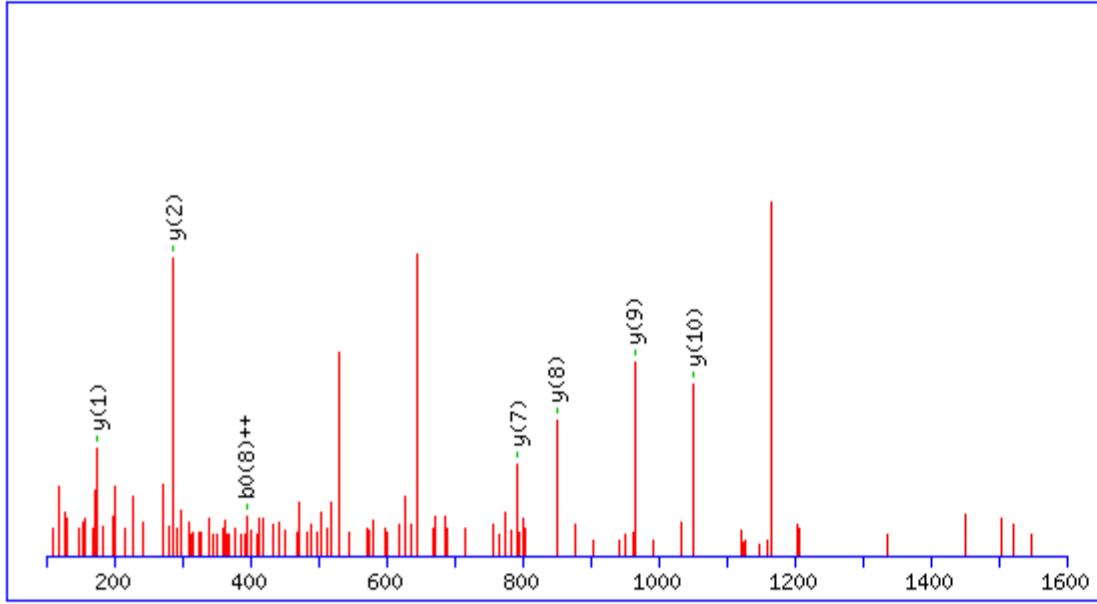

Monoisotopic mass of neutral peptide Mr(calc): 1164.544479

Fixed modifications: Propionamide (C) (apply to specified residues or termini only)

Ions Score: 39 Expect: 0.0013

Matches : 7/92 fragment ions using 11 most intense peaks ([help](#))

| #  | b          | b <sup>++</sup> | b <sup>0</sup> | b <sup>0++</sup>  | Seq. | y                  | y <sup>++</sup> | y <sup>*</sup> | y <sup>+++</sup> | y <sup>0</sup> | y <sup>0++</sup> | #  |
|----|------------|-----------------|----------------|-------------------|------|--------------------|-----------------|----------------|------------------|----------------|------------------|----|
| 1  | 114.091340 | 57.549308       |                |                   | L    |                    |                 |                |                  |                |                  | 11 |
| 2  | 201.123368 | 101.065322      | 183.112803     | 92.060039         | S    | <b>1052.467700</b> | 526.737488      | 1035.441151    | 518.224214       | 1034.457135    | 517.732206       | 10 |
| 3  | 316.150311 | 158.578793      | 298.139746     | 149.573511        | D    | <b>965.435672</b>  | 483.221474      | 948.409123     | 474.708200       | 947.425107     | 474.216192       | 9  |
| 4  | 373.171775 | 187.089525      | 355.161210     | 178.084243        | G    | <b>850.408729</b>  | 425.708003      | 833.382180     | 417.194728       | 832.398164     | 416.702720       | 8  |
| 5  | 488.198718 | 244.602997      | 470.188153     | 235.597715        | D    | <b>793.387265</b>  | 397.197271      | 776.360716     | 388.683996       | 775.376700     | 388.191988       | 7  |
| 6  | 619.239203 | 310.123240      | 601.228638     | 301.117957        | M    | 678.360322         | 339.683799      | 661.333773     | 331.170525       | 660.349757     | 330.678517       | 6  |
| 7  | 720.286882 | 360.647079      | 702.276317     | 351.641797        | T    | 547.319837         | 274.163557      | 530.293288     | 265.650282       | 529.309272     | 265.158274       | 5  |
| 8  | 807.318910 | 404.163093      | 789.308345     | <b>395.157811</b> | S    | 446.272158         | 223.639717      | 429.245609     | 215.126442       | 428.261593     | 214.634434       | 4  |
| 9  | 878.356024 | 439.681650      | 860.345459     | 430.676368        | A    | 359.240130         | 180.123703      | 342.213581     | 171.610428       |                |                  | 3  |
| 10 | 991.440088 | 496.223682      | 973.429523     | 487.218400        | L    | <b>288.203016</b>  | 144.605146      | 271.176467     | 136.091871       |                |                  | 2  |
| 11 |            |                 |                |                   | R    | <b>175.118952</b>  | 88.063114       | 158.092403     | 79.549839        |                |                  | 1  |

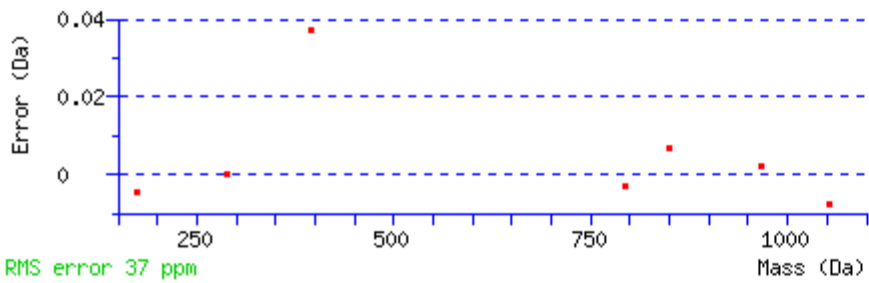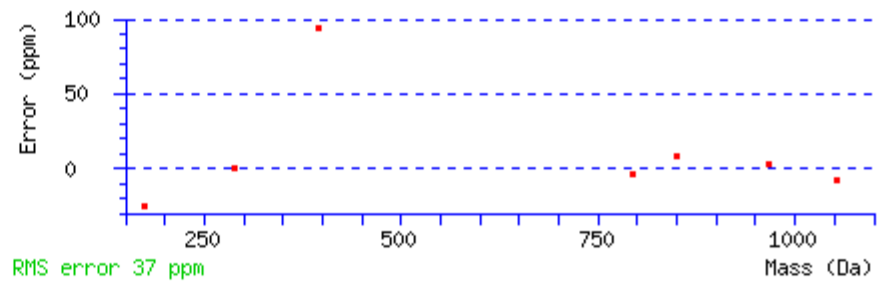

NCBI BLAST search of [LSDGDMTSALR](#)

(Parameters: blastp, nr protein database, expect=20000, no filter, PAM30)

Other BLAST [web gateways](#)

## All matches to this query

| Score | Mr(calc):   | Delta     | Sequence                    |
|-------|-------------|-----------|-----------------------------|
| 38.7  | 1164.544479 | 0.006729  | <a href="#">LSDGDMTSALR</a> |
| 7.4   | 1164.541092 | 0.010116  | <a href="#">SGTEYPENLR</a>  |
| 7.0   | 1164.552353 | -0.001145 | <a href="#">SDLPPQHAPR</a>  |
| 5.4   | 1164.545334 | 0.005874  | <a href="#">MLADMMGQLR</a>  |
| 4.8   | 1164.555710 | -0.004502 | <a href="#">LDSPTMSRAR</a>  |
| 2.8   | 1164.559723 | -0.008515 | <a href="#">LCFLEDAQR</a>   |
| 1.0   | 1164.552353 | -0.001145 | <a href="#">GVDPHEQDIR</a>  |
| 1.0   | 1164.544464 | 0.006744  | <a href="#">STADLMENLR</a>  |
| 0.2   | 1164.559738 | -0.008530 | <a href="#">EDQFMIQVR</a>   |

# MASCOT SCIENCE Mascot Search Results

## Peptide View

MS/MS Fragmentation of **ALEIIDFFR**

Found in **ATG9A\_HUMAN**, Autophagy-related protein 9A OS=Homo sapiens GN=ATG9A PE=1 SV=3

Match to Query 23638: 1122.608308 from(562.311430,2+) rtinseconds(4151) index(61267)

Title: Locus:1.1.1.3001.10

Data file 2011-11-14 - TFD - EP 7-1.mgf

Click mouse within plot area to zoom in by factor of two about that point

Or, Plot from  to  Da

Label all possible matches  Label matches used for scoring

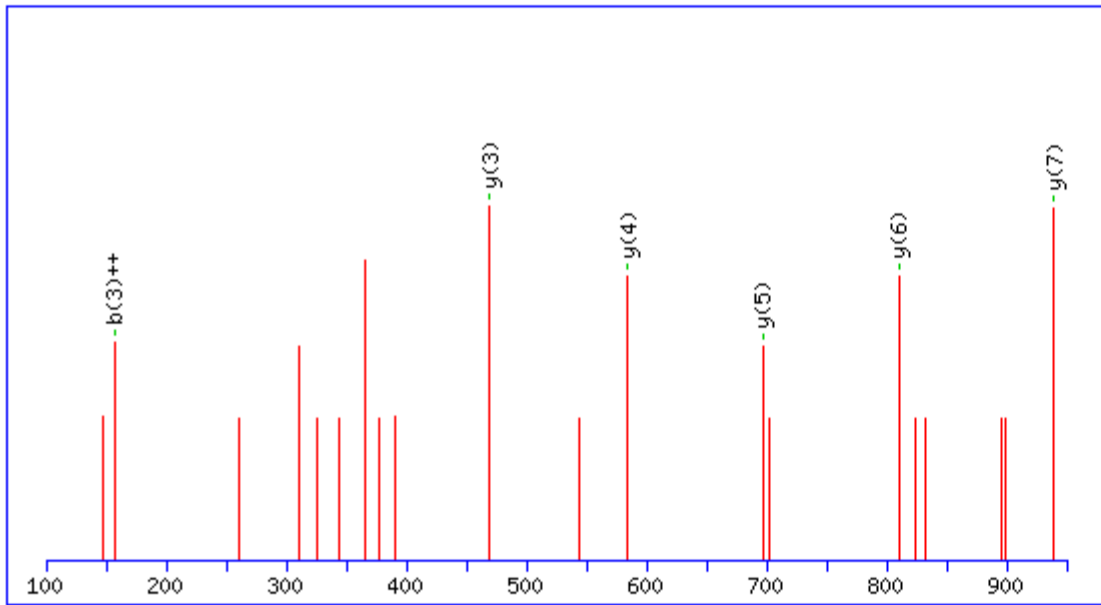

Monoisotopic mass of neutral peptide Mr(calc): 1122.607330

Fixed modifications: Propionamide (C) (apply to specified residues or termini only)

Ions Score: 35 Expect: 0.0022

Matches : 6/70 fragment ions using 8 most intense peaks ([help](#))

| # | b          | b <sup>++</sup>   | b <sup>0</sup> | b <sup>0++</sup> | Seq. | y                 | y <sup>++</sup> | y <sup>*</sup> | y <sup>++</sup> | y <sup>0</sup> | y <sup>0++</sup> | # |
|---|------------|-------------------|----------------|------------------|------|-------------------|-----------------|----------------|-----------------|----------------|------------------|---|
| 1 | 72.044390  | 36.525833         |                |                  | A    |                   |                 |                |                 |                |                  | 9 |
| 2 | 185.128454 | 93.067865         |                |                  | L    | 1052.577508       | 526.792392      | 1035.550959    | 518.279118      | 1034.566943    | 517.787110       | 8 |
| 3 | 314.171047 | <b>157.589161</b> | 296.160482     | 148.583879       | E    | <b>939.493444</b> | 470.250360      | 922.466895     | 461.737086      | 921.482879     | 461.245078       | 7 |
| 4 | 427.255111 | 214.131193        | 409.244546     | 205.125911       | I    | <b>810.450851</b> | 405.729064      | 793.424302     | 397.215789      | 792.440286     | 396.723781       | 6 |
| 5 | 540.339175 | 270.673226        | 522.328610     | 261.667943       | I    | <b>697.366787</b> | 349.187032      | 680.340238     | 340.673757      | 679.356222     | 340.181749       | 5 |
| 6 | 655.366118 | 328.186697        | 637.355553     | 319.181415       | D    | <b>584.282723</b> | 292.645000      | 567.256174     | 284.131725      | 566.272158     | 283.639717       | 4 |
| 7 | 802.434532 | 401.720904        | 784.423967     | 392.715622       | F    | <b>469.255780</b> | 235.131528      | 452.229231     | 226.618253      |                |                  | 3 |
| 8 | 949.502946 | 475.255111        | 931.492381     | 466.249828       | F    | 322.187366        | 161.597321      | 305.160817     | 153.084047      |                |                  | 2 |
| 9 |            |                   |                |                  | R    | 175.118952        | 88.063114       | 158.092403     | 79.549840       |                |                  | 1 |

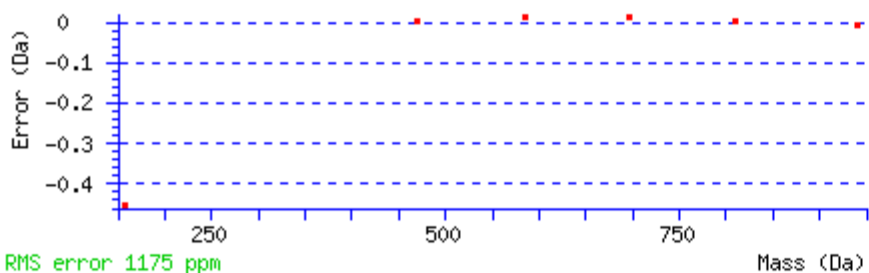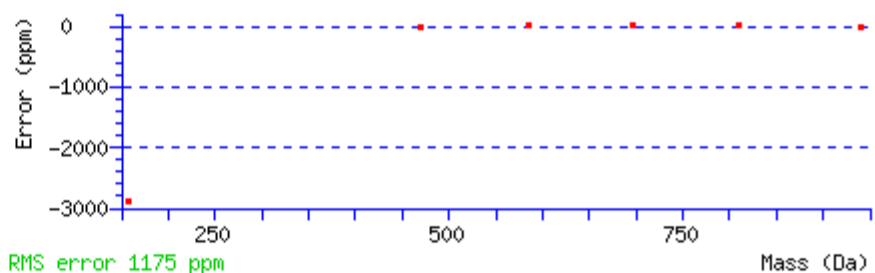

NCBI BLAST search of [ALEIIDFFR](#)

(Parameters: blastp, nr protein database, expect=20000, no filter, PAM30)

Other BLAST [web gateways](#)

## All matches to this query

| Score | Mr(calc):   | Delta    | Sequence                   |
|-------|-------------|----------|----------------------------|
| 35.2  | 1122.607330 | 0.000978 | <a href="#">ALEIIDFFR</a>  |
| 4.8   | 1122.607346 | 0.000962 | <a href="#">SVFVGNLPYK</a> |
| 1.7   | 1122.603287 | 0.005021 | <a href="#">NILYTRSEK</a>  |
| 0.8   | 1122.603302 | 0.005006 | <a href="#">NKAPQEPPVK</a> |

# MASCOT Search Results

## Peptide View

MS/MS Fragmentation of **ILEEIDTLILPENFK**

Found in **BAG1\_HUMAN**, BAG family molecular chaperone regulator 1 OS=Homo sapiens GN=BAG1 PE=1 SV=4

Match to Query 58533: 1785.985368 from(893.999960,2+) rtinseconds(3968) index(59563)

Title: Locus:1.1.1.2889.44

Data file 2011-11-14 - TFD - EP 8-4.mgf

Click mouse within plot area to zoom in by factor of two about that point

Or, Plot from  to  Da

Label all possible matches  Label matches used for scoring

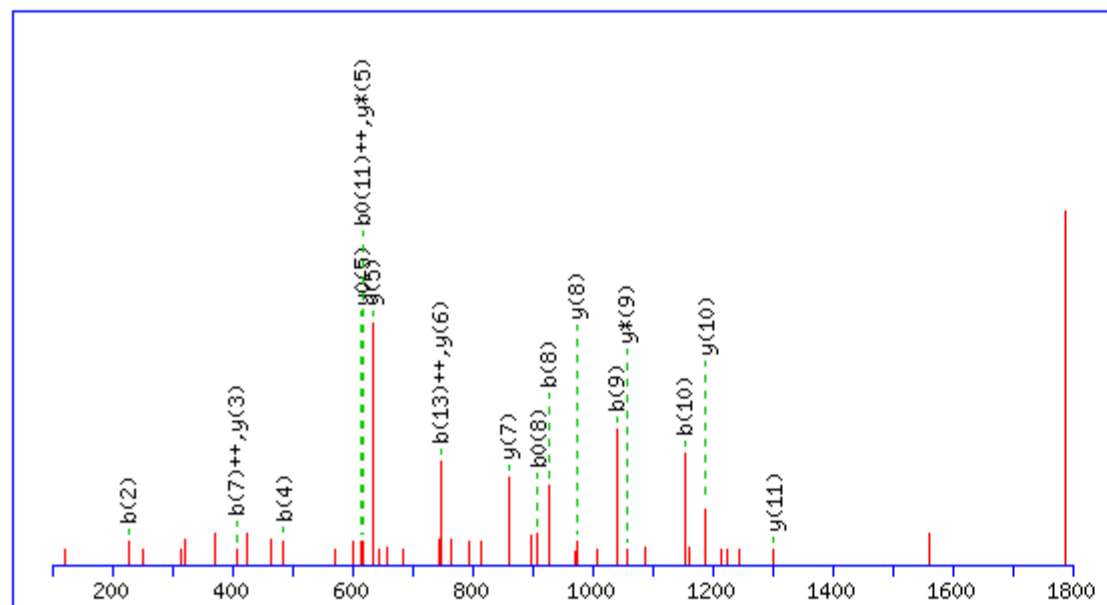

Monoisotopic mass of neutral peptide Mr(calc): 1785.976379

Fixed modifications: Propionamide (C) (apply to specified residues or termini only)

Ions Score: 31 Expect: 0.0046

Matches : 19/134 fragment ions using 35 most intense peaks ([help](#))

| #  | b                  | b <sup>++</sup>   | b <sup>*</sup> | b <sup>*++</sup> | b <sup>0</sup>    | b <sup>0++</sup>  | Seq. | y                  | y <sup>++</sup> | y <sup>*</sup>     | y <sup>*++</sup> | y <sup>0</sup>    | y <sup>0++</sup> | #  |
|----|--------------------|-------------------|----------------|------------------|-------------------|-------------------|------|--------------------|-----------------|--------------------|------------------|-------------------|------------------|----|
| 1  | 114.091340         | 57.549308         |                |                  |                   |                   | I    |                    |                 |                    |                  |                   |                  | 15 |
| 2  | <b>227.175404</b>  | 114.091340        |                |                  |                   |                   | L    | 1673.899630        | 837.453453      | 1656.873081        | 828.940179       | 1655.889065       | 828.448171       | 14 |
| 3  | 356.217997         | 178.612637        |                |                  | 338.207432        | 169.607354        | E    | 1560.815566        | 780.911421      | 1543.789017        | 772.398147       | 1542.805001       | 771.906139       | 13 |
| 4  | <b>485.260590</b>  | 243.133933        |                |                  | 467.250025        | 234.128651        | E    | 1431.772973        | 716.390124      | 1414.746424        | 707.876850       | 1413.762408       | 707.384842       | 12 |
| 5  | 598.344654         | 299.675965        |                |                  | 580.334089        | 290.670683        | I    | <b>1302.730380</b> | 651.868828      | 1285.703831        | 643.355554       | 1284.719815       | 642.863545       | 11 |
| 6  | 713.371597         | 357.189437        |                |                  | 695.361032        | 348.184154        | D    | <b>1189.646316</b> | 595.326796      | 1172.619767        | 586.813522       | 1171.635751       | 586.321514       | 10 |
| 7  | 814.419276         | <b>407.713276</b> |                |                  | 796.408711        | 398.707994        | T    | 1074.619373        | 537.813325      | <b>1057.592824</b> | 529.300050       | 1056.608808       | 528.808042       | 9  |
| 8  | <b>927.503340</b>  | 464.255308        |                |                  | <b>909.492775</b> | 455.250026        | L    | <b>973.571694</b>  | 487.289485      | 956.545145         | 478.776210       | 955.561129        | 478.284202       | 8  |
| 9  | <b>1040.587404</b> | 520.797340        |                |                  | 1022.576839       | 511.792058        | I    | <b>860.487630</b>  | 430.747453      | 843.461081         | 422.234178       | 842.477065        | 421.742170       | 7  |
| 10 | <b>1153.671468</b> | 577.339372        |                |                  | 1135.660903       | 568.334090        | L    | <b>747.403566</b>  | 374.205421      | 730.377017         | 365.692146       | 729.393001        | 365.200138       | 6  |
| 11 | 1250.724232        | 625.865754        |                |                  | 1232.713667       | <b>616.860472</b> | P    | <b>634.319502</b>  | 317.663389      | <b>617.292953</b>  | 309.150115       | <b>616.308937</b> | 308.658107       | 5  |
| 12 | 1379.766825        | 690.387050        |                |                  | 1361.756260       | 681.381768        | E    | 537.266738         | 269.137007      | 520.240189         | 260.623733       | 519.256173        | 260.131725       | 4  |
| 13 | 1493.809752        | <b>747.408514</b> | 1476.783203    | 738.895240       | 1475.799187       | 738.403231        | N    | <b>408.224145</b>  | 204.615711      | 391.197596         | 196.102436       |                   |                  | 3  |
| 14 | 1640.878166        | 820.942721        | 1623.851617    | 812.429447       | 1622.867601       | 811.937438        | F    | 294.181218         | 147.594247      | 277.154669         | 139.080973       |                   |                  | 2  |
| 15 |                    |                   |                |                  |                   |                   | K    | 147.112804         | 74.060040       | 130.086255         | 65.546765        |                   |                  | 1  |

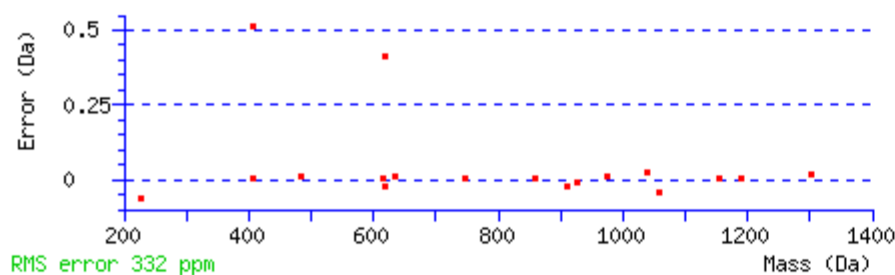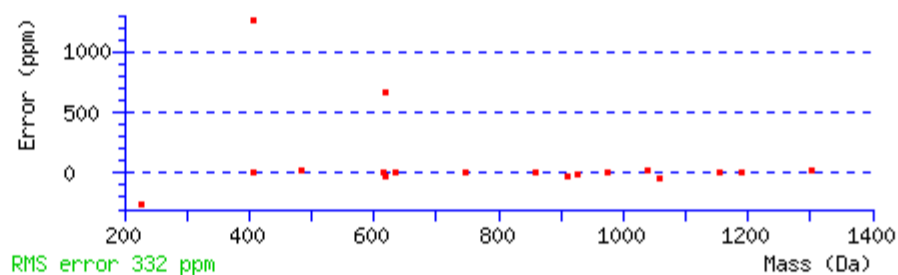

NCBI BLAST search of [ILEEIDTLILPENFK](#)

(Parameters: blastp, nr protein database, expect=20000, no filter, PAM30)

Other BLAST [web gateways](#)

All matches to this query

| Score | Mr(calc):   | Delta    | Sequence                        |
|-------|-------------|----------|---------------------------------|
| 30.8  | 1785.976379 | 0.008989 | <a href="#">ILEEIDTLILPENFK</a> |

Mascot: <http://www.matrixscience.com/>

# MASCOT SCIENCE Mascot Search Results

## Peptide View

MS/MS Fragmentation of **ELLALDSVDPEGR**

Found in **BAG3\_HUMAN**, BAG family molecular chaperone regulator 3 OS=Homo sapiens GN=BAG3 PE=1 SV=3

Match to Query 40419: 1412.711848 from(707.363200,2+) rtinseconds(2870) index(35380)

Title: Locus:1.1.1.2730.33

Data file 2011-11-12 - TFD - EP 5-2.mgf

Click mouse within plot area to zoom in by factor of two about that point

Or, Plot from  to  Da

Label all possible matches  Label matches used for scoring

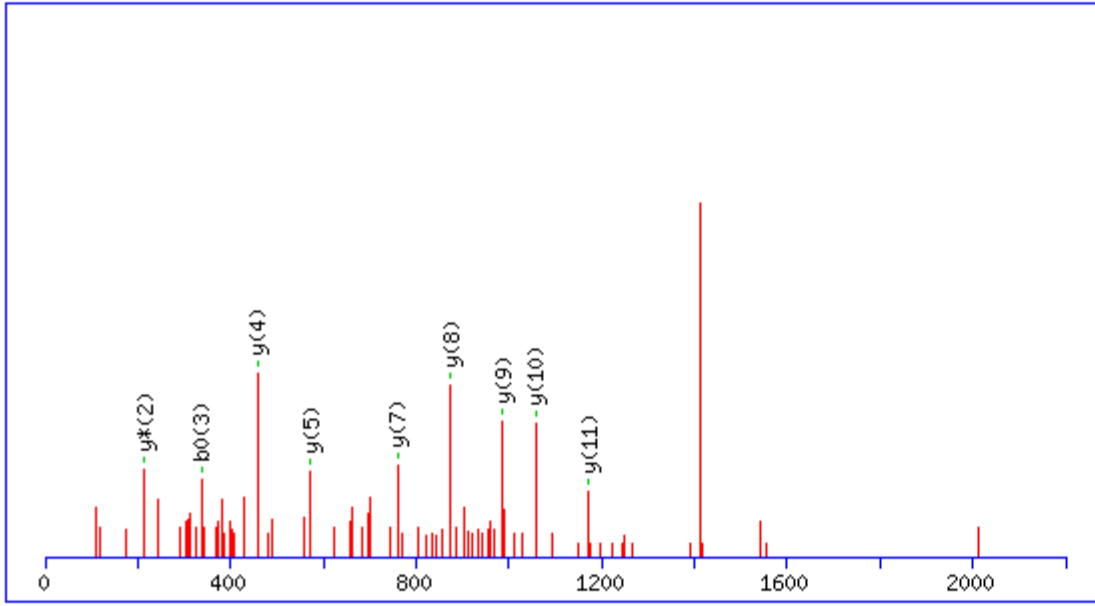

Monoisotopic mass of neutral peptide Mr(calc): 1412.714706

Fixed modifications: Propionamide (C) (apply to specified residues or termini only)

Ions Score: 50 Expect: 8.9e-005

Matches : 9/116 fragment ions using 13 most intense peaks ([help](#))

| #  | b           | b <sup>++</sup> | b <sup>0</sup> | b <sup>0++</sup> | Seq. | y           | y <sup>++</sup> | y <sup>*</sup> | y <sup>*++</sup> | y <sup>0</sup> | y <sup>0++</sup> | #  |
|----|-------------|-----------------|----------------|------------------|------|-------------|-----------------|----------------|------------------|----------------|------------------|----|
| 1  | 130.049869  | 65.528572       | 112.039304     | 56.523290        | E    |             |                 |                |                  |                |                  | 13 |
| 2  | 243.133933  | 122.070605      | 225.123368     | 113.065322       | L    | 1284.679407 | 642.843341      | 1267.652858    | 634.330067       | 1266.668842    | 633.838059       | 12 |
| 3  | 356.217997  | 178.612637      | 338.207432     | 169.607354       | L    | 1171.595343 | 586.301310      | 1154.568794    | 577.788035       | 1153.584778    | 577.296027       | 11 |
| 4  | 427.255111  | 214.131193      | 409.244546     | 205.125911       | A    | 1058.511279 | 529.759278      | 1041.484730    | 521.246003       | 1040.500714    | 520.753995       | 10 |
| 5  | 540.339175  | 270.673226      | 522.328610     | 261.667943       | L    | 987.474165  | 494.240721      | 970.447616     | 485.727446       | 969.463600     | 485.235438       | 9  |
| 6  | 655.366118  | 328.186697      | 637.355553     | 319.181415       | D    | 874.390101  | 437.698689      | 857.363552     | 429.185414       | 856.379536     | 428.693406       | 8  |
| 7  | 742.398146  | 371.702711      | 724.387581     | 362.697429       | S    | 759.363158  | 380.185217      | 742.336609     | 371.671943       | 741.352593     | 371.179935       | 7  |
| 8  | 841.466560  | 421.236918      | 823.455995     | 412.231635       | V    | 672.331130  | 336.669203      | 655.304581     | 328.155929       | 654.320565     | 327.663921       | 6  |
| 9  | 956.493503  | 478.750389      | 938.482938     | 469.745107       | D    | 573.262716  | 287.134996      | 556.236167     | 278.621722       | 555.252151     | 278.129714       | 5  |
| 10 | 1053.546267 | 527.276772      | 1035.535702    | 518.271489       | P    | 458.235773  | 229.621524      | 441.209224     | 221.108250       | 440.225208     | 220.616242       | 4  |
| 11 | 1182.588860 | 591.798068      | 1164.578295    | 582.792786       | E    | 361.183009  | 181.095142      | 344.156460     | 172.581868       | 343.172444     | 172.089860       | 3  |
| 12 | 1239.610324 | 620.308800      | 1221.599759    | 611.303518       | G    | 232.140416  | 116.573846      | 215.113867     | 108.060571       |                |                  | 2  |
| 13 |             |                 |                |                  | R    | 175.118952  | 88.063114       | 158.092403     | 79.549839        |                |                  | 1  |

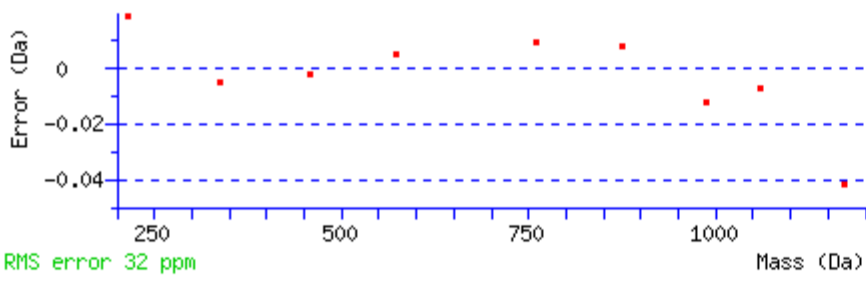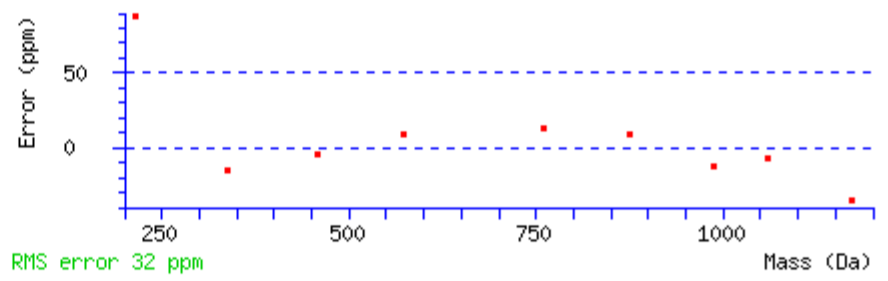

NCBI BLAST search of [ELLALDSVDPEGR](#)

(Parameters: blastp, nr protein database, expect=20000, no filter, PAM30)

Other BLAST [web gateways](#)

## All matches to this query

| Score | Mr(calc):   | Delta     | Sequence                      |
|-------|-------------|-----------|-------------------------------|
| 49.7  | 1412.714706 | -0.002858 | <a href="#">ELLALDSVDPEGR</a> |
| 2.5   | 1412.708176 | 0.003672  | <a href="#">ALSLCPSPAQSPR</a> |

Mascot: <http://www.matrixscience.com/>

# MASCOT Search Results

## Peptide View

MS/MS Fragmentation of **IEIQNIFEEAQLVLR**

Found in **BAG5\_HUMAN**, BAG family molecular chaperone regulator 5 OS=Homo sapiens GN=BAG5 PE=1 SV=1

Match to Query 53581: 1787.938032 from(596.986620,3+) rtinseconds(4408) index(68523)

Title: Locus:1.1.1.3165.7

Data file 2011-11-10 - TFD - EP 4-3.mgf

Click mouse within plot area to zoom in by factor of two about that point

Or, Plot from  to  Da

Label all possible matches  Label matches used for scoring

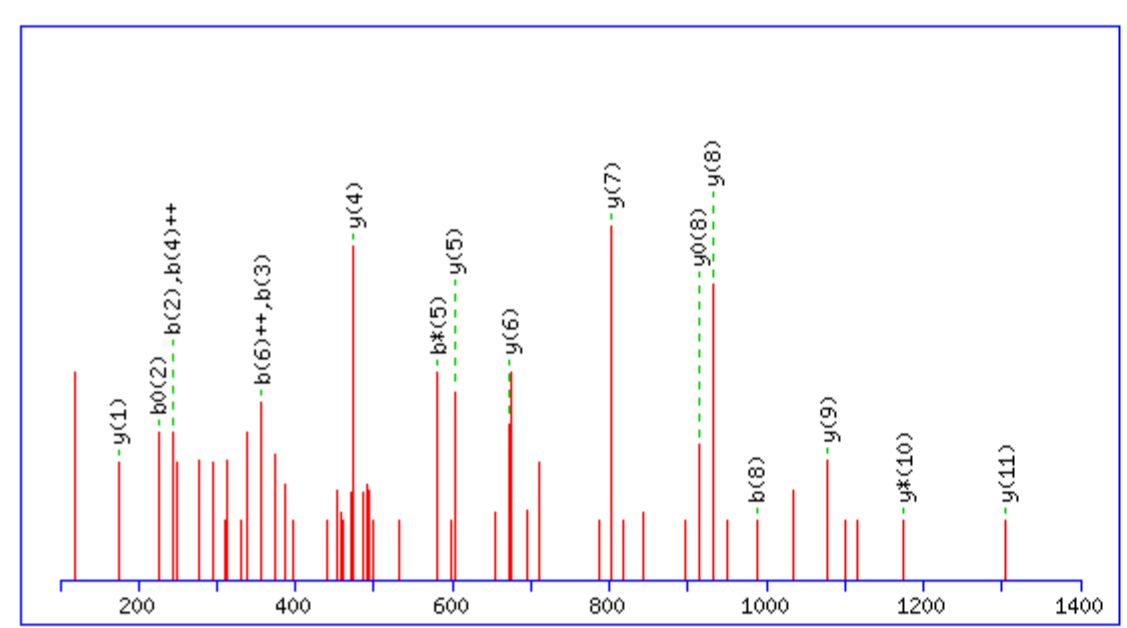

Monoisotopic mass of neutral peptide Mr(calc): 1787.941727

Fixed modifications: Propionamide (C) (apply to specified residues or termini only)

Ions Score: 54 Expect: 3.9e-005

Matches : 17/154 fragment ions using 22 most intense peaks [\(help\)](#)

| #  | b                 | b <sup>++</sup>   | b <sup>*</sup>    | b <sup>*++</sup> | b <sup>0</sup>    | b <sup>0++</sup> | Seq. | y                  | y <sup>++</sup> | y <sup>*</sup>     | y <sup>*++</sup> | y <sup>0</sup>    | y <sup>0++</sup> | #  |
|----|-------------------|-------------------|-------------------|------------------|-------------------|------------------|------|--------------------|-----------------|--------------------|------------------|-------------------|------------------|----|
| 1  | 114.091340        | 57.549308         |                   |                  |                   |                  | I    |                    |                 |                    |                  |                   |                  | 15 |
| 2  | <b>243.133933</b> | 122.070605        |                   |                  | <b>225.123368</b> | 113.065322       | E    | 1675.864976        | 838.436126      | 1658.838427        | 829.922852       | 1657.854411       | 829.430844       | 14 |
| 3  | <b>356.217997</b> | 178.612637        |                   |                  | 338.207432        | 169.607354       | I    | 1546.822383        | 773.914830      | 1529.795834        | 765.401555       | 1528.811818       | 764.909547       | 13 |
| 4  | 484.276575        | <b>242.641926</b> | 467.250026        | 234.128651       | 466.266010        | 233.636643       | Q    | 1433.738319        | 717.372798      | 1416.711770        | 708.859523       | 1415.727754       | 708.367515       | 12 |
| 5  | 598.319502        | 299.663389        | <b>581.292953</b> | 291.150115       | 580.308937        | 290.658107       | N    | <b>1305.679741</b> | 653.343509      | 1288.653192        | 644.830234       | 1287.669176       | 644.338226       | 11 |
| 6  | 711.403566        | <b>356.205421</b> | 694.377017        | 347.692147       | 693.393001        | 347.200139       | I    | 1191.636814        | 596.322045      | <b>1174.610265</b> | 587.808771       | 1173.626249       | 587.316763       | 10 |
| 7  | 858.471980        | 429.739628        | 841.445431        | 421.226354       | 840.461415        | 420.734346       | F    | <b>1078.552750</b> | 539.780013      | 1061.526201        | 531.266739       | 1060.542185       | 530.774731       | 9  |
| 8  | <b>987.514573</b> | 494.260925        | 970.488024        | 485.747650       | 969.504008        | 485.255642       | E    | <b>931.484336</b>  | 466.245806      | 914.457787         | 457.732532       | <b>913.473771</b> | 457.240524       | 8  |
| 9  | 1116.557166       | 558.782221        | 1099.530617       | 550.268947       | 1098.546601       | 549.776939       | E    | <b>802.441743</b>  | 401.724510      | 785.415194         | 393.211235       | 784.431178        | 392.719227       | 7  |
| 10 | 1187.594280       | 594.300778        | 1170.567731       | 585.787504       | 1169.583715       | 585.295496       | A    | <b>673.399150</b>  | 337.203213      | 656.372601         | 328.689939       | 655.388585        | 328.197931       | 6  |
| 11 | 1315.652858       | 658.330067        | 1298.626309       | 649.816793       | 1297.642293       | 649.324785       | Q    | <b>602.362036</b>  | 301.684656      | 585.335487         | 293.171382       | 584.351471        | 292.679374       | 5  |
| 12 | 1402.684886       | 701.846081        | 1385.658337       | 693.332807       | 1384.674321       | 692.840799       | S    | <b>474.303458</b>  | 237.655367      | 457.276909         | 229.142092       | 456.292893        | 228.650084       | 4  |
| 13 | 1515.768950       | 758.388113        | 1498.742401       | 749.874839       | 1497.758385       | 749.382831       | L    | 387.271430         | 194.139353      | 370.244881         | 185.626078       |                   |                  | 3  |
| 14 | 1614.837364       | 807.922320        | 1597.810815       | 799.409046       | 1596.826799       | 798.917038       | V    | 274.187366         | 137.597321      | 257.160817         | 129.084047       |                   |                  | 2  |
| 15 |                   |                   |                   |                  |                   |                  | R    | <b>175.118952</b>  | 88.063114       | 158.092403         | 79.549839        |                   |                  | 1  |

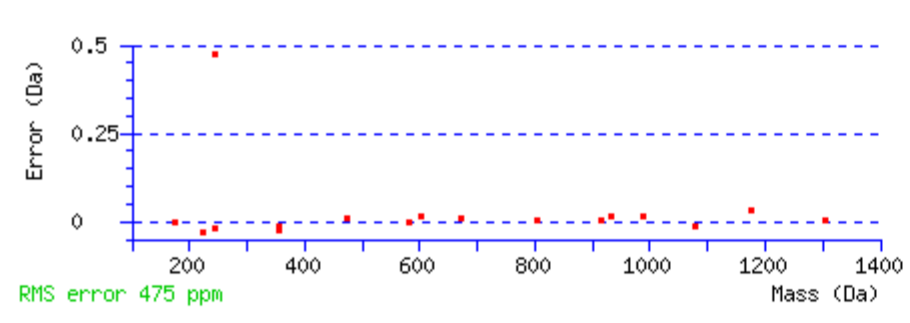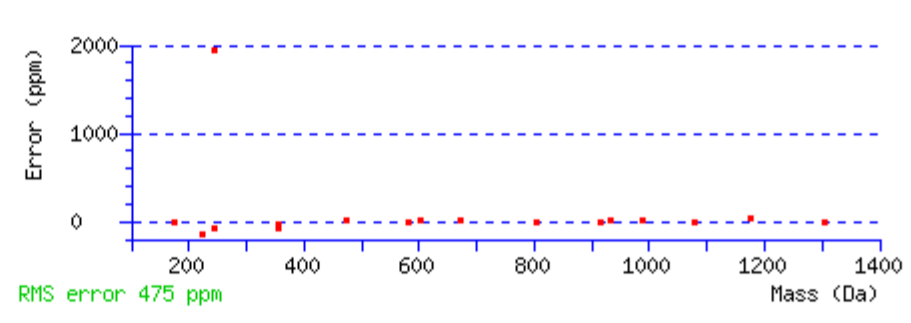

NCBI BLAST search of [IEIQNIFEEAQLVLR](#)

(Parameters: blastp, nr protein database, expect=20000, no filter, PAM30)

Other BLAST [web gateways](#)

### All matches to this query

| Score | Mr(calc):   | Delta     | Sequence                          |
|-------|-------------|-----------|-----------------------------------|
| 54.5  | 1787.941727 | -0.003695 | <a href="#">IEIQNIFEEAQLVLR</a>   |
| 9.3   | 1787.937714 | 0.000318  | <a href="#">EQLAQQSQLTERLTSK</a>  |
| 3.4   | 1787.945114 | -0.007082 | <a href="#">LTAIDILTTCAADIQR</a>  |
| 0.6   | 1787.945145 | -0.007113 | <a href="#">SVLLDVSAGQLLMVDGR</a> |



# **MATRIX** SCIENCE Mascot Search Results

## Peptide View

MS/MS Fragmentation of **AYVVLGQFLVLK**

Found in **BAF\_HUMAN**, Barrier-to-autointegration factor OS=Homo sapiens GN=BANF1 PE=1 SV=1

Match to Query 35121: 1348.799828 from(675.407190,2+) rtinseconds(3883) index(57987)

Title: Locus:1.1.1.1915.17

Data file 2012-01-27 - TFD - Epitel - IEC - 10ul - 3.mgf

Click mouse within plot area to zoom in by factor of two about that point

Or, Plot from  to  Da

Label all possible matches  Label matches used for scoring

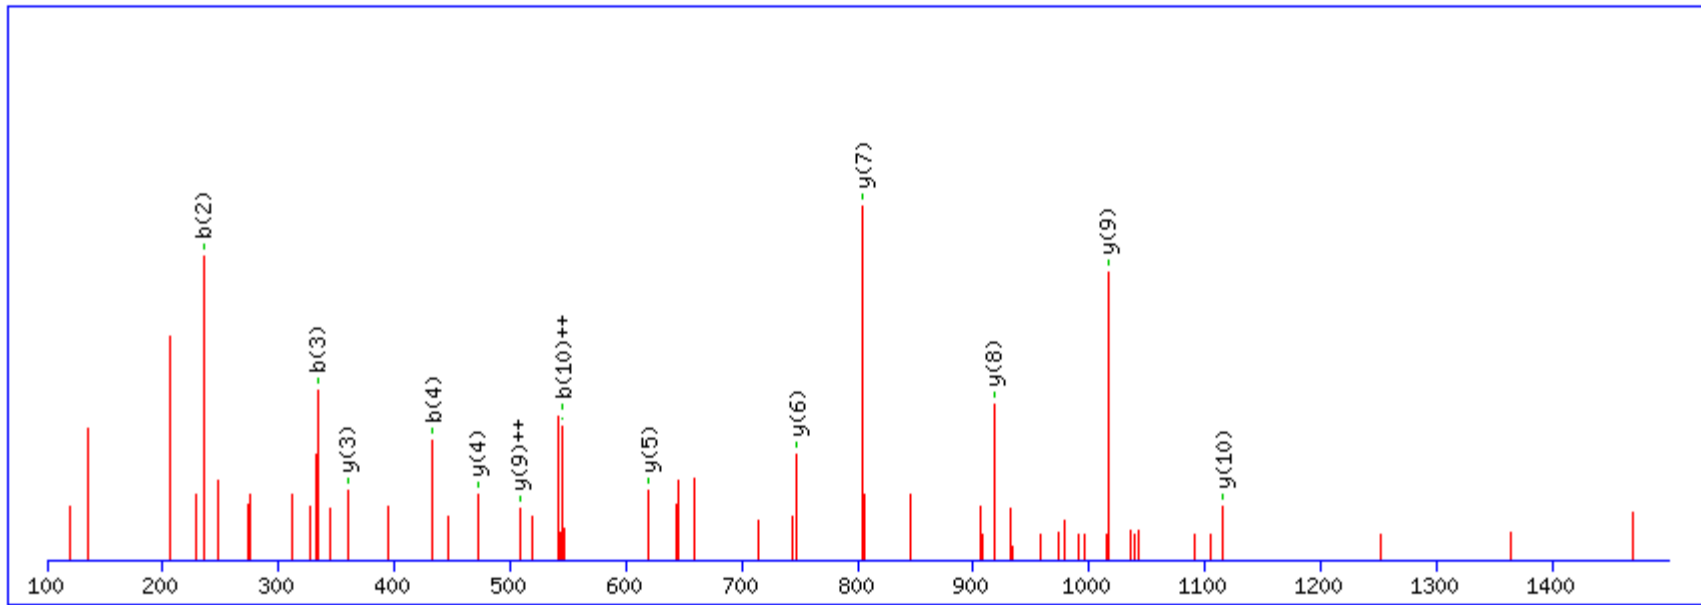

Monoisotopic mass of neutral peptide Mr(calc): 1348.811859

Fixed modifications: Carbamidomethyl (C) (apply to specified residues or termini only)

Ions Score: 40 Expect: 0.00015

Matches : 13/76 fragment ions using 31 most intense peaks [\(help\)](#)

| #  | b                 | b <sup>++</sup>   | b <sup>*</sup> | b <sup>*++</sup> | Seq. | y                  | y <sup>++</sup>   | y <sup>*</sup> | y <sup>*++</sup> | #  |
|----|-------------------|-------------------|----------------|------------------|------|--------------------|-------------------|----------------|------------------|----|
| 1  | 72.044390         | 36.525833         |                |                  | A    |                    |                   |                |                  | 12 |
| 2  | <b>235.107719</b> | 118.057498        |                |                  | Y    | 1278.782023        | 639.894650        | 1261.755474    | 631.381375       | 11 |
| 3  | <b>334.176133</b> | 167.591704        |                |                  | V    | <b>1115.718694</b> | 558.362985        | 1098.692145    | 549.849711       | 10 |
| 4  | <b>433.244547</b> | 217.125912        |                |                  | V    | <b>1016.650280</b> | <b>508.828778</b> | 999.623731     | 500.315503       | 9  |
| 5  | 546.328611        | 273.667944        |                |                  | L    | <b>917.581866</b>  | 459.294571        | 900.555317     | 450.781297       | 8  |
| 6  | 603.350075        | 302.178676        |                |                  | G    | <b>804.497802</b>  | 402.752539        | 787.471253     | 394.239264       | 7  |
| 7  | 731.408653        | 366.207965        | 714.382104     | 357.694690       | Q    | <b>747.476338</b>  | 374.241807        | 730.449789     | 365.728532       | 6  |
| 8  | 878.477067        | 439.742172        | 861.450518     | 431.228897       | F    | <b>619.417760</b>  | 310.212518        | 602.391211     | 301.699243       | 5  |
| 9  | 991.561131        | 496.284204        | 974.534582     | 487.770929       | L    | <b>472.349346</b>  | 236.678311        | 455.322797     | 228.165036       | 4  |
| 10 | 1090.629545       | <b>545.818411</b> | 1073.602996    | 537.305136       | V    | <b>359.265282</b>  | 180.136279        | 342.238733     | 171.623004       | 3  |
| 11 | 1203.713609       | 602.360442        | 1186.687060    | 593.847168       | L    | 260.196868         | 130.602072        | 243.170319     | 122.088797       | 2  |
| 12 |                   |                   |                |                  | K    | 147.112804         | 74.060040         | 130.086255     | 65.546765        | 1  |

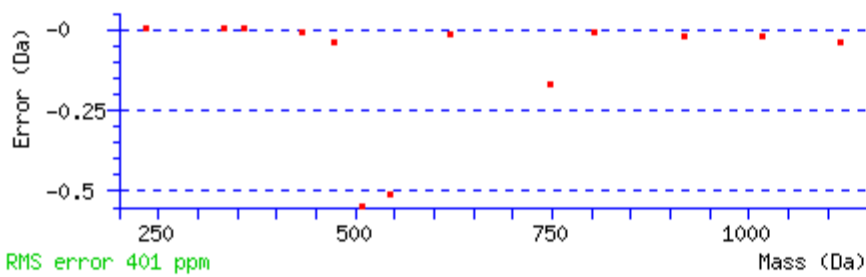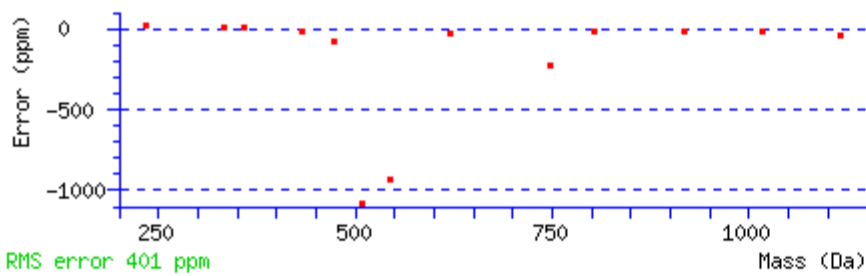

NCBI BLAST search of [AYVVLGQFLVLK](#)

(Parameters: blastp, nr protein database, expect=20000, no filter, PAM30)

Other BLAST [web gateways](#)

## All matches to this query

| Score | Mr(calc):   | Delta     | Sequence                     |
|-------|-------------|-----------|------------------------------|
| 40.1  | 1348.811859 | -0.012031 | <a href="#">AYVVLGQFLVLK</a> |

# **MASCOT** Mascot Search Results

## Peptide View

MS/MS Fragmentation of **FFVSSSQGR**

Found in **BASI\_HUMAN**, Basigin OS=Homo sapiens GN=BSG PE=1 SV=2

Match to Query 279038: 1013.493148 from(507.753850,2+) rtinseconds(1683) index(830505)

Title: Locus:1.1.1.1187.20

Data file C:\Program Files (x86)\Matrix Science\Mascot Daemon\mgf3 TFD - Epitel - R2\mascot\_daemon\_merge.mgf

Click mouse within plot area to zoom in by factor of two about that point

Or, Plot from  to  Da

Label all possible matches  Label matches used for scoring

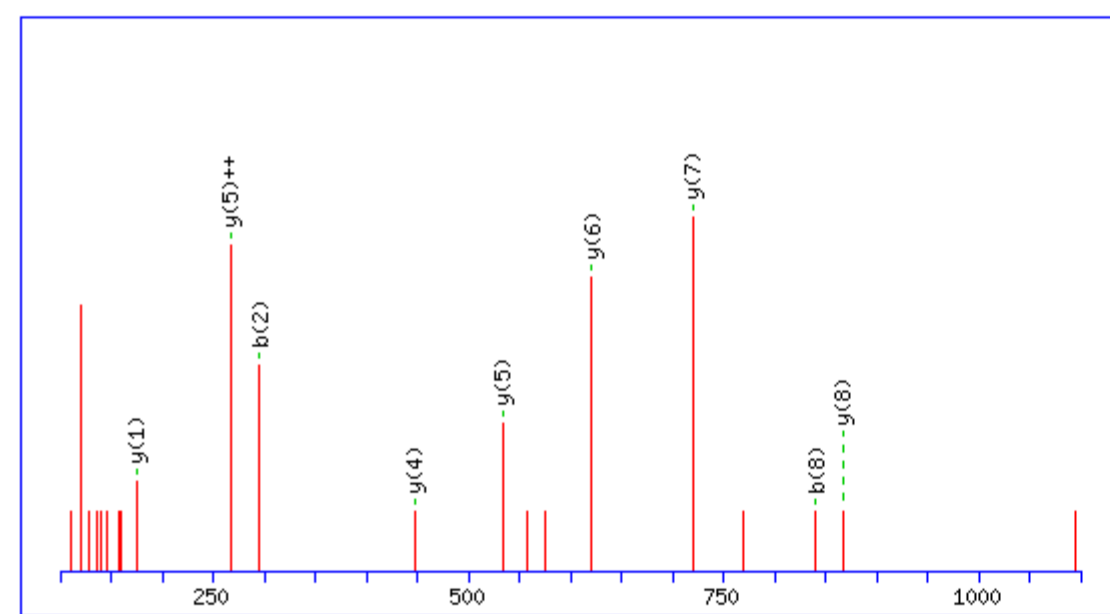

Monoisotopic mass of neutral peptide Mr(calc): 1013.493057

Fixed modifications: Carbamidomethyl (C) (apply to specified residues or termini only)

Ions Score: 48 Expect: 0.00038

Matches : 9/72 fragment ions using 12 most intense peaks [\(help\)](#)

| # | b                 | b <sup>++</sup> | b*         | b <sup>+++</sup> | b <sup>0</sup> | b <sup>0++</sup> | Seq. | y                 | y <sup>++</sup>   | y*         | y <sup>+++</sup> | y <sup>0</sup> | y <sup>0++</sup> | # |
|---|-------------------|-----------------|------------|------------------|----------------|------------------|------|-------------------|-------------------|------------|------------------|----------------|------------------|---|
| 1 | 148.075690        | 74.541483       |            |                  |                |                  | F    |                   |                   |            |                  |                |                  | 9 |
| 2 | <b>295.144104</b> | 148.075690      |            |                  |                |                  | F    | <b>867.431906</b> | 434.219591        | 850.405357 | 425.706317       | 849.421341     | 425.214309       | 8 |
| 3 | 394.212518        | 197.609897      |            |                  |                |                  | V    | <b>720.363492</b> | 360.685384        | 703.336943 | 352.172110       | 702.352927     | 351.680102       | 7 |
| 4 | 481.244546        | 241.125911      |            |                  | 463.233981     | 232.120628       | S    | <b>621.295078</b> | 311.151177        | 604.268529 | 302.637903       | 603.284513     | 302.145895       | 6 |
| 5 | 568.276574        | 284.641925      |            |                  | 550.266009     | 275.636642       | S    | <b>534.263050</b> | <b>267.635163</b> | 517.236501 | 259.121889       | 516.252485     | 258.629881       | 5 |
| 6 | 655.308602        | 328.157939      |            |                  | 637.298037     | 319.152656       | S    | <b>447.231022</b> | 224.119149        | 430.204473 | 215.605875       | 429.220457     | 215.113867       | 4 |
| 7 | 783.367180        | 392.187228      | 766.340631 | 383.673953       | 765.356615     | 383.181945       | Q    | 360.198994        | 180.603135        | 343.172445 | 172.089861       |                |                  | 3 |
| 8 | <b>840.388644</b> | 420.697960      | 823.362095 | 412.184686       | 822.378079     | 411.692678       | G    | 232.140416        | 116.573846        | 215.113867 | 108.060572       |                |                  | 2 |
| 9 |                   |                 |            |                  |                |                  | R    | <b>175.118952</b> | 88.063114         | 158.092403 | 79.549840        |                |                  | 1 |

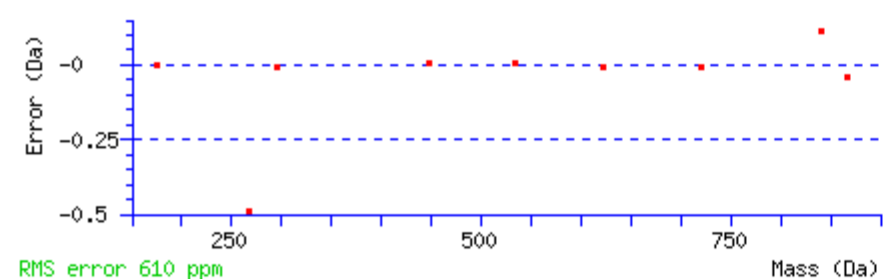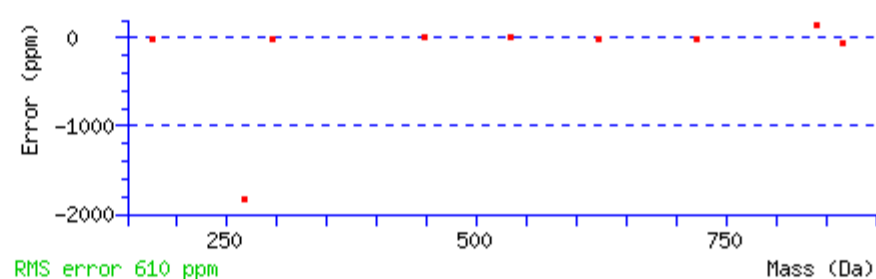

NCBI BLAST search of **FFVSSSQGR**

(Parameters: blastp, nr protein database, expect=20000, no filter, PAM30)

Other BLAST [web gateways](#)

## All matches to this query

| Score | Mr(calc):   | Delta     | Sequence                  |
|-------|-------------|-----------|---------------------------|
| 48.3  | 1013.493057 | 0.000091  | <a href="#">FFVSSSQGR</a> |
| 13.5  | 1013.485168 | 0.007980  | <a href="#">EHLPKVEM</a>  |
| 4.5   | 1013.496399 | -0.003251 | <a href="#">NMPDPITAR</a> |
| 3.1   | 1013.488998 | 0.004150  | <a href="#">QEAEPPIR</a>  |
| 1.3   | 1013.493011 | 0.000137  | <a href="#">NLNPEWVK</a>  |
| 1.1   | 1013.489227 | 0.003921  | <a href="#">FFGLPITGM</a> |

Mascot: <http://www.matrixscience.com/>

# MASCOT Search Results

## Peptide View

MS/MS Fragmentation of **GLDTLVESIR**

Found in **BCL10\_HUMAN**, B-cell lymphoma/leukemia 10 OS=Homo sapiens GN=BCL10 PE=1 SV=1

Match to Query 23547: 1101.597828 from(551.806190,2+) rtinseconds(3076) index(41398)

Title: Locus:1.1.1.2485.23

Data file 2011-11-10 - TFD - EP 4-5.mgf

Click mouse within plot area to zoom in by factor of two about that point

Or, Plot from  to  Da

Label all possible matches  Label matches used for scoring

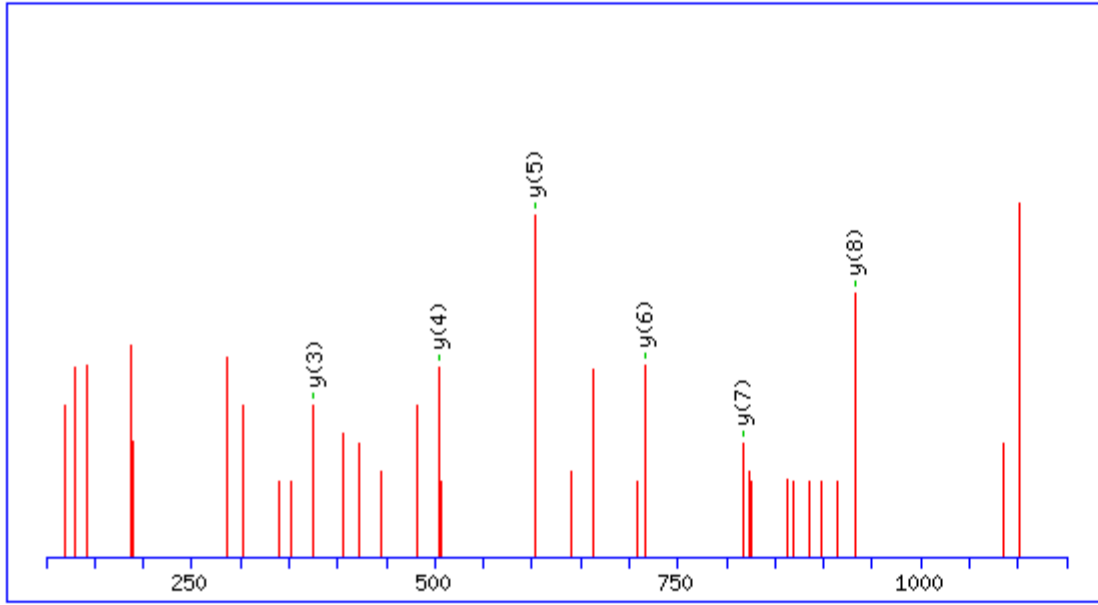

Monoisotopic mass of neutral peptide Mr(calc): 1101.602982

Fixed modifications: Propionamide (C) (apply to specified residues or termini only)

Ions Score: 47 Expect: 0.00021

Matches : 6/82 fragment ions using 10 most intense peaks ([help](#))

| #  | b          | b <sup>++</sup> | b <sup>0</sup> | b <sup>0++</sup> | Seq.     | y                 | y <sup>++</sup> | y <sup>*</sup> | y <sup>+++</sup> | y <sup>0</sup> | y <sup>0++</sup> | #  |
|----|------------|-----------------|----------------|------------------|----------|-------------------|-----------------|----------------|------------------|----------------|------------------|----|
| 1  | 58.028740  | 29.518008       |                |                  | <b>G</b> |                   |                 |                |                  |                |                  | 10 |
| 2  | 171.112804 | 86.060040       |                |                  | <b>L</b> | 1045.588801       | 523.298039      | 1028.562252    | 514.784764       | 1027.578236    | 514.292756       | 9  |
| 3  | 286.139747 | 143.573512      | 268.129182     | 134.568229       | <b>D</b> | <b>932.504737</b> | 466.756007      | 915.478188     | 458.242732       | 914.494172     | 457.750724       | 8  |
| 4  | 387.187426 | 194.097351      | 369.176861     | 185.092069       | <b>T</b> | <b>817.477794</b> | 409.242535      | 800.451245     | 400.729261       | 799.467229     | 400.237253       | 7  |
| 5  | 500.271490 | 250.639383      | 482.260925     | 241.634101       | <b>L</b> | <b>716.430115</b> | 358.718696      | 699.403566     | 350.205421       | 698.419550     | 349.713413       | 6  |
| 6  | 599.339904 | 300.173590      | 581.329339     | 291.168308       | <b>V</b> | <b>603.346051</b> | 302.176664      | 586.319502     | 293.663389       | 585.335486     | 293.171381       | 5  |
| 7  | 728.382497 | 364.694887      | 710.371932     | 355.689604       | <b>E</b> | <b>504.277637</b> | 252.642456      | 487.251088     | 244.129182       | 486.267072     | 243.637174       | 4  |
| 8  | 815.414525 | 408.210901      | 797.403960     | 399.205618       | <b>S</b> | <b>375.235044</b> | 188.121160      | 358.208495     | 179.607885       | 357.224479     | 179.115877       | 3  |
| 9  | 928.498589 | 464.752933      | 910.488024     | 455.747650       | <b>I</b> | 288.203016        | 144.605146      | 271.176467     | 136.091871       |                |                  | 2  |
| 10 |            |                 |                |                  | <b>R</b> | 175.118952        | 88.063114       | 158.092403     | 79.549839        |                |                  | 1  |

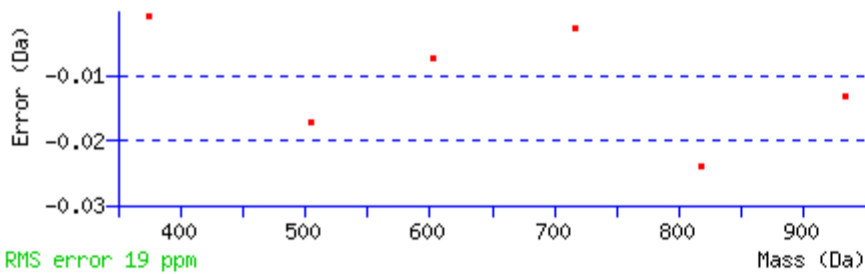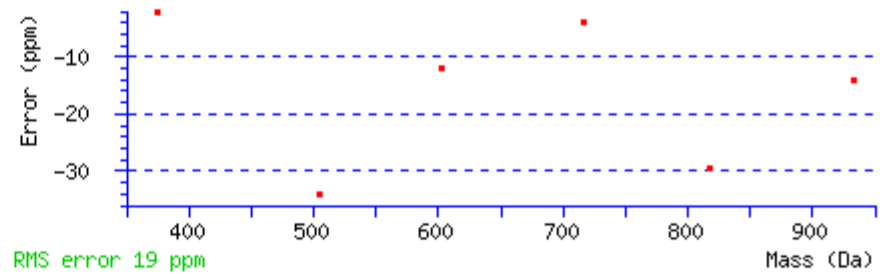

NCBI BLAST search of **GLDTLVESIR**

(Parameters: blastp, nr protein database, expect=20000, no filter, PAM30)

Other BLAST [web gateways](#)

All matches to this query

| Score | Mr(calc):   | Delta     | Sequence                   |
|-------|-------------|-----------|----------------------------|
| 47.5  | 1101.602982 | -0.005154 | <a href="#">GLDTLVESIR</a> |

Mascot: <http://www.matrixscience.com/>

**MATRIX SCIENCE Mascot Search Results**

**Peptide View**

MS/MS Fragmentation of **GLGPSPAGDGPSGSGK**

Found in **BAD\_HUMAN**, Bcl2 antagonist of cell death OS=Homo sapiens GN=BAD PE=1 SV=3

Match to Query 38936: 1339.637788 from(670.826170,2+) rtinseconds(1260) index(7166)

Title: Locus:1.1.1.1800.51

Data file 2011-11-14 - TFD - EP 8-5.mgf

Click mouse within plot area to zoom in by factor of two about that point

Or, Plot from  to  Da

Label all possible matches  Label matches used for scoring

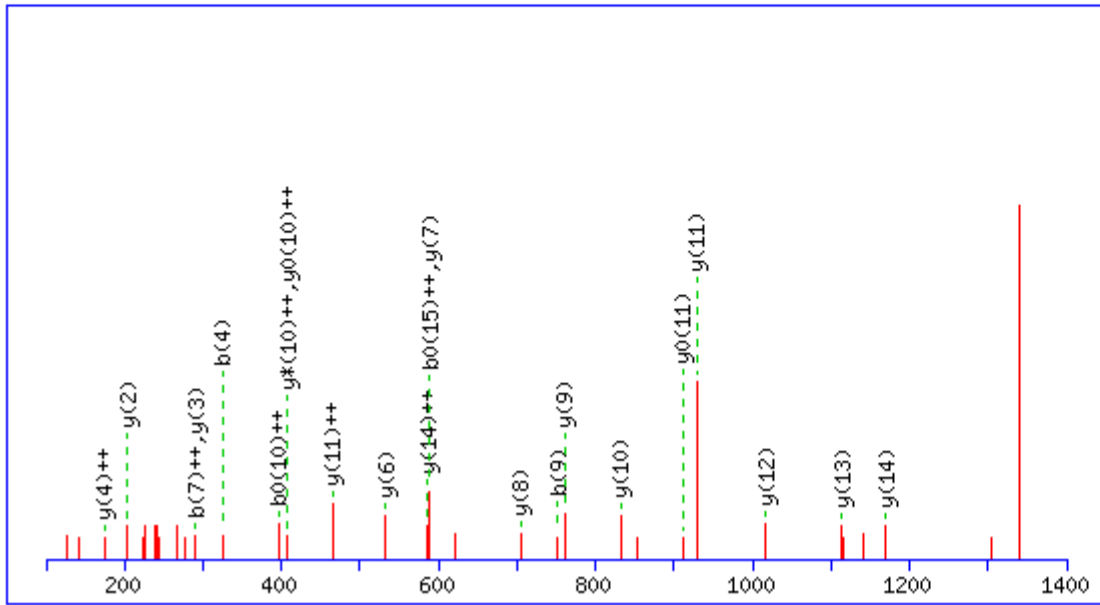

Monoisotopic mass of neutral peptide Mr(calc): 1339.636826

Fixed modifications: Propionamide (C) (apply to specified residues or termini only)

Ions Score: 85 Expect: 3.2e-008

Matches : 22/138 fragment ions using 32 most intense peaks [\(help\)](#)

| #  | b                 | b <sup>++</sup>   | b <sup>0</sup> | b <sup>0++</sup>  | Seq. | y                  | y <sup>++</sup>   | y <sup>*</sup> | y <sup>+++</sup>  | y <sup>0</sup>    | y <sup>0++</sup>  | #  |
|----|-------------------|-------------------|----------------|-------------------|------|--------------------|-------------------|----------------|-------------------|-------------------|-------------------|----|
| 1  | 58.028740         | 29.518008         |                |                   | G    |                    |                   |                |                   |                   |                   | 16 |
| 2  | 171.112804        | 86.060040         |                |                   | L    | 1283.622621        | 642.314949        | 1266.596072    | 633.801674        | 1265.612056       | 633.309666        | 15 |
| 3  | 228.134268        | 114.570772        |                |                   | G    | <b>1170.538557</b> | <b>585.772917</b> | 1153.512008    | 577.259642        | 1152.527992       | 576.767634        | 14 |
| 4  | <b>325.187032</b> | 163.097154        |                |                   | P    | <b>1113.517093</b> | 557.262185        | 1096.490544    | 548.748910        | 1095.506528       | 548.256902        | 13 |
| 5  | 412.219060        | 206.613168        | 394.208495     | 197.607885        | S    | <b>1016.464329</b> | 508.735803        | 999.437780     | 500.222528        | 998.453764        | 499.730520        | 12 |
| 6  | 509.271824        | 255.139550        | 491.261259     | 246.134267        | P    | <b>929.432301</b>  | <b>465.219789</b> | 912.405752     | 456.706514        | <b>911.421736</b> | 456.214506        | 11 |
| 7  | 580.308938        | <b>290.658107</b> | 562.298373     | 281.652825        | A    | <b>832.379537</b>  | 416.693407        | 815.352988     | <b>408.180132</b> | 814.368972        | <b>407.688124</b> | 10 |
| 8  | 637.330402        | 319.168839        | 619.319837     | 310.163557        | G    | <b>761.342423</b>  | 381.174850        | 744.315874     | 372.661575        | 743.331858        | 372.169567        | 9  |
| 9  | <b>752.357345</b> | 376.682311        | 734.346780     | 367.677028        | D    | <b>704.320959</b>  | 352.664118        | 687.294410     | 344.150843        | 686.310394        | 343.658835        | 8  |
| 10 | 809.378809        | 405.193043        | 791.368244     | <b>396.187760</b> | G    | <b>589.294016</b>  | 295.150646        | 572.267467     | 286.637372        | 571.283451        | 286.145364        | 7  |
| 11 | 906.431573        | 453.719425        | 888.421008     | 444.714142        | P    | <b>532.272552</b>  | 266.639914        | 515.246003     | 258.126640        | 514.261987        | 257.634632        | 6  |
| 12 | 993.463601        | 497.235439        | 975.453036     | 488.230156        | S    | 435.219788         | 218.113532        | 418.193239     | 209.600258        | 417.209223        | 209.108250        | 5  |
| 13 | 1050.485065       | 525.746171        | 1032.474500    | 516.740888        | G    | 348.187760         | <b>174.597518</b> | 331.161211     | 166.084244        | 330.177195        | 165.592236        | 4  |
| 14 | 1137.517093       | 569.262185        | 1119.506528    | 560.256902        | S    | <b>291.166296</b>  | 146.086786        | 274.139747     | 137.573512        | 273.155731        | 137.081504        | 3  |
| 15 | 1194.538557       | 597.772917        | 1176.527992    | <b>588.767634</b> | G    | <b>204.134268</b>  | 102.570772        | 187.107719     | 94.057497         |                   |                   | 2  |
| 16 |                   |                   |                |                   | K    | 147.112804         | 74.060040         | 130.086255     | 65.546765         |                   |                   | 1  |

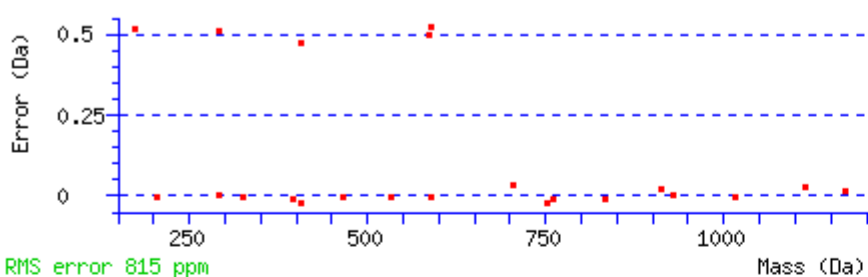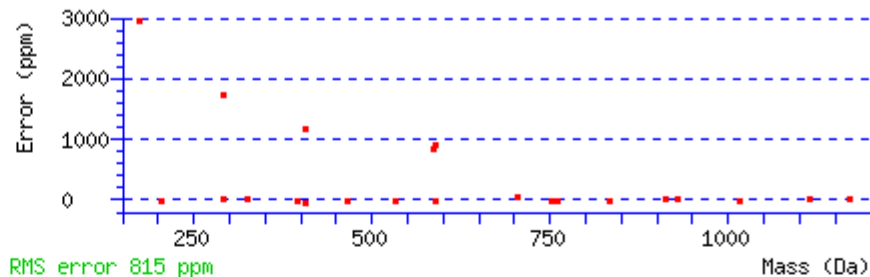

NCBI BLAST search of **GLGPSPAGDGPSGSGK**

(Parameters: blastp, nr protein database, expect=20000, no filter, PAM30)

Other BLAST [web gateways](#)

All matches to this query

| Score | Mr(calc):   | Delta    | Sequence                         |
|-------|-------------|----------|----------------------------------|
| 85.0  | 1339.636826 | 0.000962 | <a href="#">GLGPSPAGDGPSGSGK</a> |
| 6.1   | 1339.626434 | 0.011354 | <a href="#">VPNACLFTMNK</a>      |

# MASCOT SCIENCE Mascot Search Results

## Peptide View

### MS/MS Fragmentation of **TIAPQNAPR**

Found in **BCLF1\_HUMAN**, Bcl-2-associated transcription factor 1 OS=Homo sapiens GN=BCLAF1 PE=1 SV=2

Match to Query 13202: 966.533868 from(484.274210,2+) rtinseconds(1010) index(4464)

Title: Locus:1.1.1.1709.25

Data file 2011-11-12 - TFD - EP 6-1.mgf

Click mouse within plot area to zoom in by factor of two about that point

Or, Plot from  to  Da

Label all possible matches  Label matches used for scoring

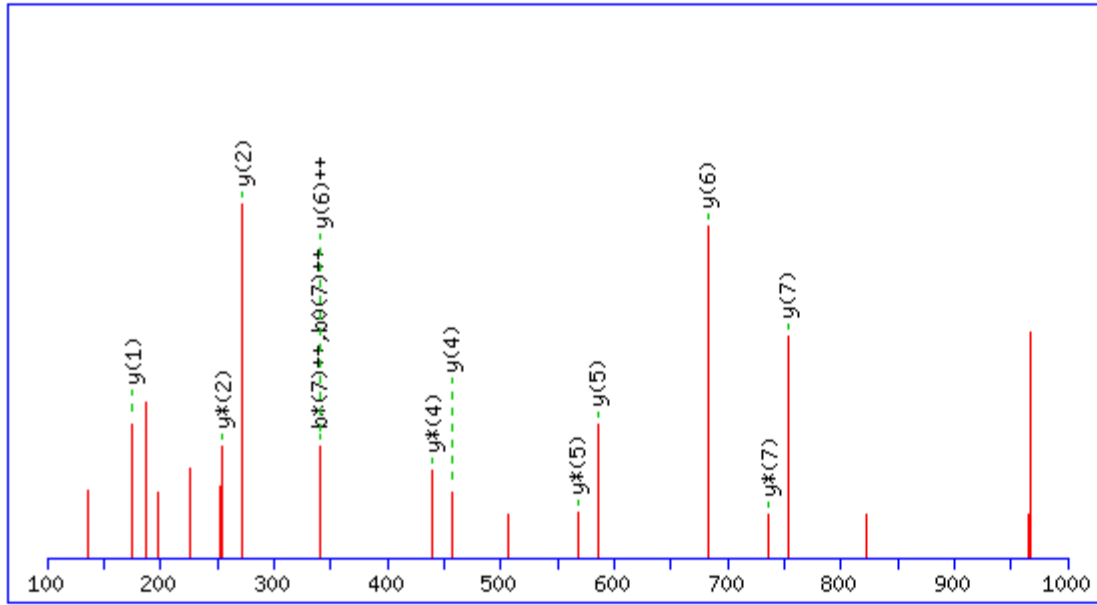

Monoisotopic mass of neutral peptide Mr(calc): 966.524658

Fixed modifications: Propionamide (C) (apply to specified residues or termini only)

Ions Score: 51 Expect: 6.2e-005

Matches : 13/72 fragment ions using 14 most intense peaks ([help](#))

| # | b          | b <sup>++</sup> | b <sup>*</sup> | b <sup>*++</sup>  | b <sup>0</sup> | b <sup>0++</sup>  | Seq. | y                 | y <sup>++</sup>   | y <sup>*</sup>    | y <sup>*++</sup> | # |
|---|------------|-----------------|----------------|-------------------|----------------|-------------------|------|-------------------|-------------------|-------------------|------------------|---|
| 1 | 102.054955 | 51.531116       |                |                   | 84.044390      | 42.525833         | T    |                   |                   |                   |                  | 9 |
| 2 | 215.139019 | 108.073147      |                |                   | 197.128454     | 99.067865         | I    | 866.484277        | 433.745777        | 849.457728        | 425.232502       | 8 |
| 3 | 286.176133 | 143.591704      |                |                   | 268.165568     | 134.586422        | A    | <b>753.400213</b> | 377.203745        | <b>736.373664</b> | 368.690470       | 7 |
| 4 | 383.228897 | 192.118087      |                |                   | 365.218332     | 183.112804        | P    | <b>682.363099</b> | <b>341.685188</b> | 665.336550        | 333.171913       | 6 |
| 5 | 511.287475 | 256.147376      | 494.260926     | 247.634101        | 493.276910     | 247.142093        | Q    | <b>585.310335</b> | 293.158806        | <b>568.283786</b> | 284.645531       | 5 |
| 6 | 625.330402 | 313.168839      | 608.303853     | 304.655565        | 607.319837     | 304.163557        | N    | <b>457.251757</b> | 229.129516        | <b>440.225208</b> | 220.616242       | 4 |
| 7 | 696.367516 | 348.687396      | 679.340967     | <b>340.174122</b> | 678.356951     | <b>339.682114</b> | A    | 343.208830        | 172.108053        | 326.182281        | 163.594778       | 3 |
| 8 | 793.420280 | 397.213778      | 776.393731     | 388.700504        | 775.409715     | 388.208496        | P    | <b>272.171716</b> | 136.589496        | <b>255.145167</b> | 128.076221       | 2 |
| 9 |            |                 |                |                   |                |                   | R    | <b>175.118952</b> | 88.063114         | 158.092403        | 79.549839        | 1 |

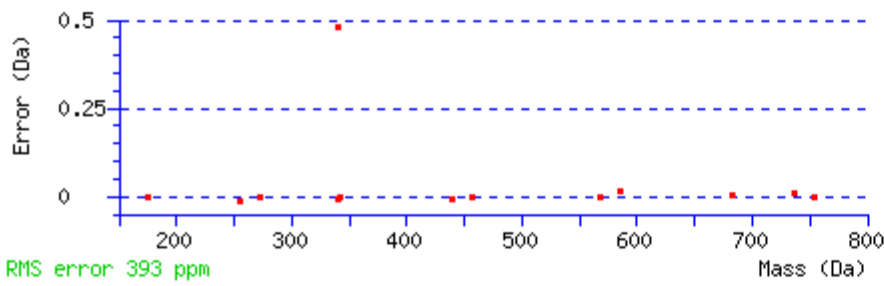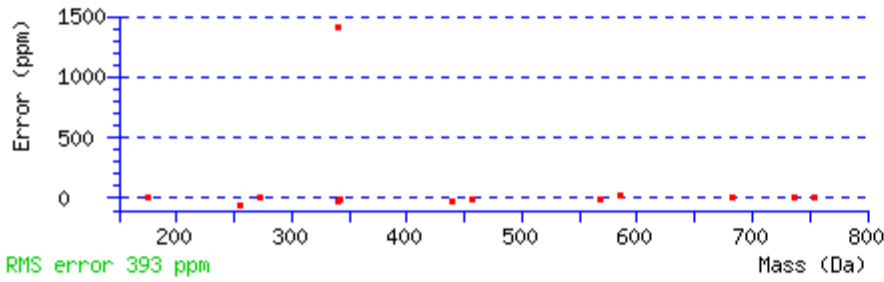

### NCBI BLAST search of **TIAPQNAPR**

(Parameters: blastp, nr protein database, expect=20000, no filter, PAM30)

Other BLAST [web gateways](#)

### All matches to this query

| Score | Mr(calc):  | Delta     | Sequence                  |
|-------|------------|-----------|---------------------------|
| 51.3  | 966.524658 | 0.009210  | <a href="#">TIAPQNAPR</a> |
| 11.8  | 966.539932 | -0.006064 | <a href="#">WPGKVPAGR</a> |
| 10.9  | 966.524658 | 0.009210  | <a href="#">VEGPAKPNR</a> |
| 4.6   | 966.524673 | 0.009195  | <a href="#">RLPAPPPR</a>  |
| 4.4   | 966.535889 | -0.002021 | <a href="#">GSLERHLR</a>  |
| 0.7   | 966.524658 | 0.009210  | <a href="#">RLEPAPPR</a>  |
| 0.3   | 966.538589 | -0.004721 | <a href="#">VDPVPLEK</a>  |

# MASCOT SEARCH RESULTS

## Peptide View

MS/MS Fragmentation of **ELVVDFLSYK**

Found in **B2CL1\_HUMAN**, Bcl-2-like protein 1 OS=Homo sapiens GN=BCL2L1 PE=1 SV=1

Match to Query 27043: 1211.645068 from(606.829810,2+) rtinseconds(3549) index(46590)

Title: Locus:1.1.1.2966.17

Data file 2011-11-10 - TFD - EP 3-5.mgf

Click mouse within plot area to zoom in by factor of two about that point

Or, Plot from  to  Da

Label all possible matches  Label matches used for scoring

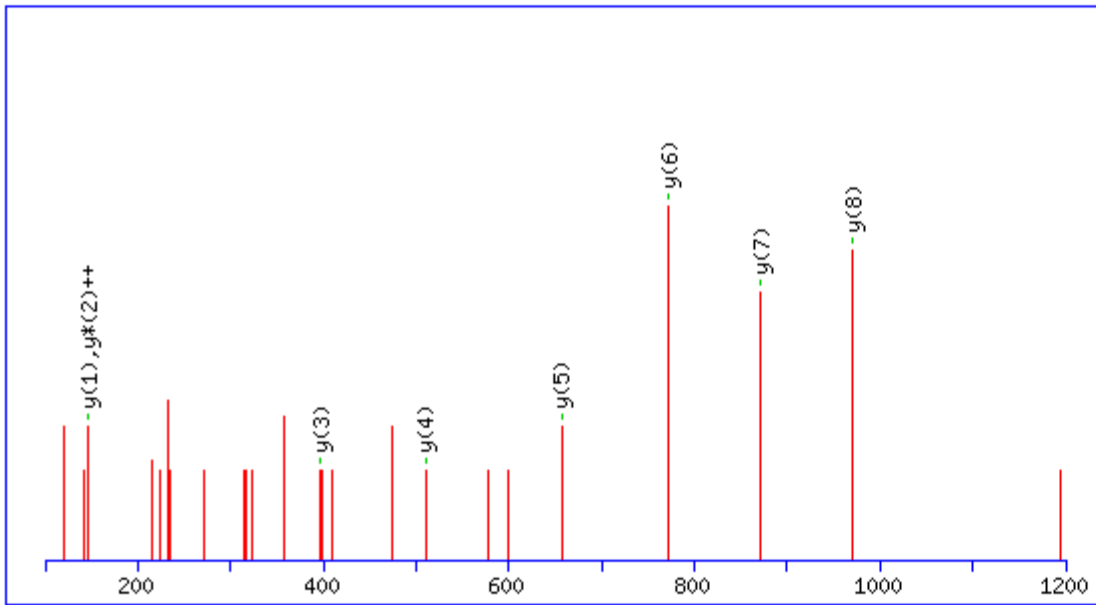

Monoisotopic mass of neutral peptide Mr(calc): 1211.643784

Fixed modifications: Propionamide (C) (apply to specified residues or termini only)

Ions Score: 49 Expect: 3.5e-005

Matches : 8/86 fragment ions using 15 most intense peaks [\(help\)](#)

| #  | b           | b <sup>++</sup> | b <sup>0</sup> | b <sup>0++</sup> | Seq. | y                 | y <sup>++</sup> | y <sup>*</sup> | y <sup>*++</sup>  | y <sup>0</sup> | y <sup>0++</sup> | #  |
|----|-------------|-----------------|----------------|------------------|------|-------------------|-----------------|----------------|-------------------|----------------|------------------|----|
| 1  | 130.049869  | 65.528572       | 112.039304     | 56.523290        | E    |                   |                 |                |                   |                |                  | 10 |
| 2  | 243.133933  | 122.070605      | 225.123368     | 113.065322       | L    | 1083.608474       | 542.307875      | 1066.581925    | 533.794601        | 1065.597909    | 533.302592       | 9  |
| 3  | 342.202347  | 171.604812      | 324.191782     | 162.599529       | V    | <b>970.524410</b> | 485.765843      | 953.497861     | 477.252569        | 952.513845     | 476.760561       | 8  |
| 4  | 441.270761  | 221.139019      | 423.260196     | 212.133736       | V    | <b>871.455996</b> | 436.231636      | 854.429447     | 427.718361        | 853.445431     | 427.226353       | 7  |
| 5  | 556.297704  | 278.652490      | 538.287139     | 269.647208       | D    | <b>772.387582</b> | 386.697429      | 755.361033     | 378.184154        | 754.377017     | 377.692146       | 6  |
| 6  | 703.366118  | 352.186697      | 685.355553     | 343.181415       | F    | <b>657.360639</b> | 329.183958      | 640.334090     | 320.670683        | 639.350074     | 320.178675       | 5  |
| 7  | 816.450182  | 408.728729      | 798.439617     | 399.723447       | L    | <b>510.292225</b> | 255.649750      | 493.265676     | 247.136476        | 492.281660     | 246.644468       | 4  |
| 8  | 903.482210  | 452.244743      | 885.471645     | 443.239461       | S    | <b>397.208161</b> | 199.107718      | 380.181612     | 190.594444        | 379.197596     | 190.102436       | 3  |
| 9  | 1066.545539 | 533.776408      | 1048.534974    | 524.771125       | Y    | 310.176133        | 155.591704      | 293.149584     | <b>147.078430</b> |                |                  | 2  |
| 10 |             |                 |                |                  | K    | <b>147.112804</b> | 74.060040       | 130.086255     | 65.546765         |                |                  | 1  |

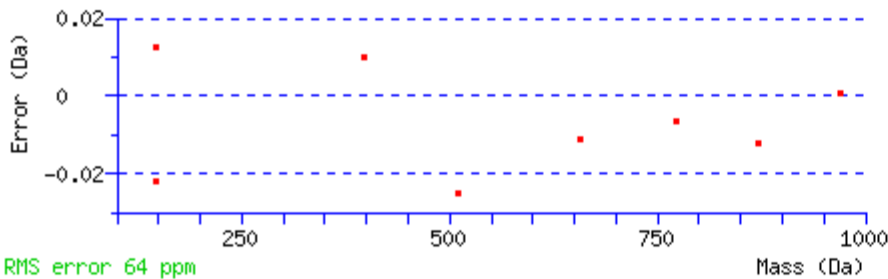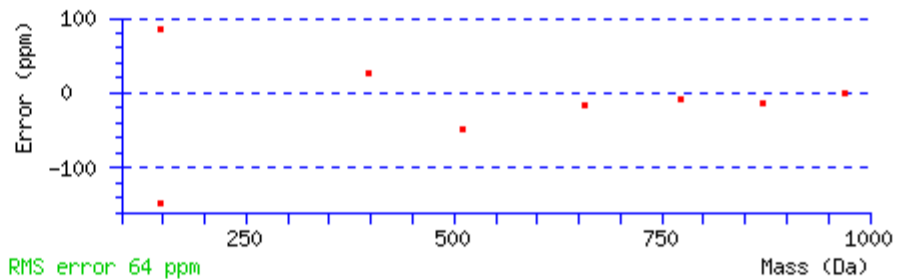

NCBI BLAST search of [ELVVDFLSYK](#)

(Parameters: blastp, nr protein database, expect=20000, no filter, PAM30)

Other BLAST [web gateways](#)

## All matches to this query

| Score | Mr(calc):   | Delta     | Sequence                   |
|-------|-------------|-----------|----------------------------|
| 49.0  | 1211.643784 | 0.001284  | <a href="#">ELVVDFLSYK</a> |
| 1.5   | 1211.655716 | -0.010648 | <a href="#">VVHRPMGTRK</a> |
| 1.2   | 1211.654999 | -0.009931 | <a href="#">LEQAVEWPLK</a> |

Mascot: <http://www.matrixscience.com/>

# MASCOT SCIENCE Mascot Search Results

## Peptide View

MS/MS Fragmentation of **VNHVTLSQPK**

Found in **B2MG\_HUMAN**, Beta-2-microglobulin OS=Homo sapiens GN=B2M PE=1 SV=1

Match to Query 422842: 1121.622008 from(561.818280,2+) rtinseconds(1063) index(495213)

Title: Locus:1.1.1.729.33

Data file C:\Program Files (x86)\Matrix Science\Mascot Daemon\mgf3 TFD - Epitel - R2\mascot\_daemon\_merge.mgf

Click mouse within plot area to zoom in by factor of two about that point

Or, Plot from  to  Da

Label all possible matches  Label matches used for scoring

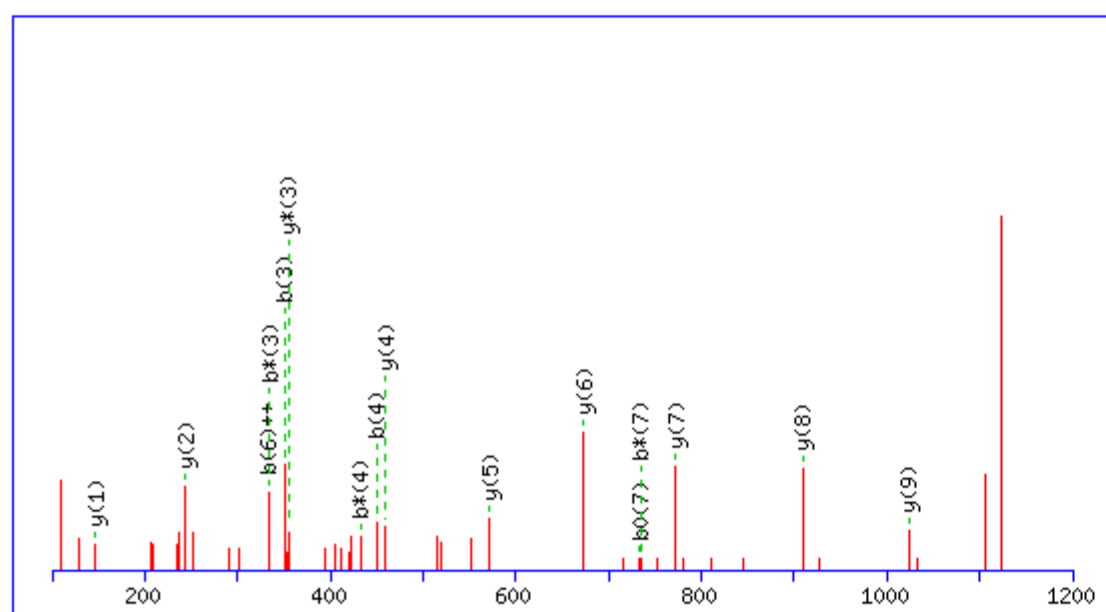

Monoisotopic mass of neutral peptide  $M_r(\text{calc})$ : 1121.619308

Fixed modifications: Carbamidomethyl (C) (apply to specified residues or termini only)

Ions Score: 53 Expect: 5e-005

Matches : 16/92 fragment ions using 32 most intense peaks ([help](#))

| #  | b          | b <sup>++</sup> | b*         | b <sup>*++</sup> | b <sup>0</sup> | b <sup>0++</sup> | Seq. | y           | y <sup>++</sup> | y*          | y <sup>*++</sup> | y <sup>0</sup> | y <sup>0++</sup> | #  |
|----|------------|-----------------|------------|------------------|----------------|------------------|------|-------------|-----------------|-------------|------------------|----------------|------------------|----|
| 1  | 100.075690 | 50.541483       |            |                  |                |                  | V    |             |                 |             |                  |                |                  | 10 |
| 2  | 214.118617 | 107.562947      | 197.092068 | 99.049672        |                |                  | N    | 1023.558170 | 512.282723      | 1006.531621 | 503.769449       | 1005.547605    | 503.277441       | 9  |
| 3  | 351.177529 | 176.092402      | 334.150980 | 167.579128       |                |                  | H    | 909.515243  | 455.261260      | 892.488694  | 446.747985       | 891.504678     | 446.255977       | 8  |
| 4  | 450.245943 | 225.626610      | 433.219394 | 217.113335       |                |                  | V    | 772.456331  | 386.731804      | 755.429782  | 378.218529       | 754.445766     | 377.726521       | 7  |
| 5  | 551.293622 | 276.150449      | 534.267073 | 267.637175       | 533.283057     | 267.145167       | T    | 673.387917  | 337.197597      | 656.361368  | 328.684322       | 655.377352     | 328.192314       | 6  |
| 6  | 664.377686 | 332.692481      | 647.351137 | 324.179207       | 646.367121     | 323.687199       | L    | 572.340238  | 286.673757      | 555.313689  | 278.160483       | 554.329673     | 277.668475       | 5  |
| 7  | 751.409714 | 376.208495      | 734.383165 | 367.695221       | 733.399149     | 367.203213       | S    | 459.256174  | 230.131725      | 442.229625  | 221.618450       | 441.245609     | 221.126443       | 4  |
| 8  | 879.468292 | 440.237784      | 862.441743 | 431.724510       | 861.457727     | 431.232502       | Q    | 372.224146  | 186.615711      | 355.197597  | 178.102437       |                |                  | 3  |
| 9  | 976.521056 | 488.764166      | 959.494507 | 480.250892       | 958.510491     | 479.758884       | P    | 244.165568  | 122.586422      | 227.139019  | 114.073148       |                |                  | 2  |
| 10 |            |                 |            |                  |                |                  | K    | 147.112804  | 74.060040       | 130.086255  | 65.546765        |                |                  | 1  |

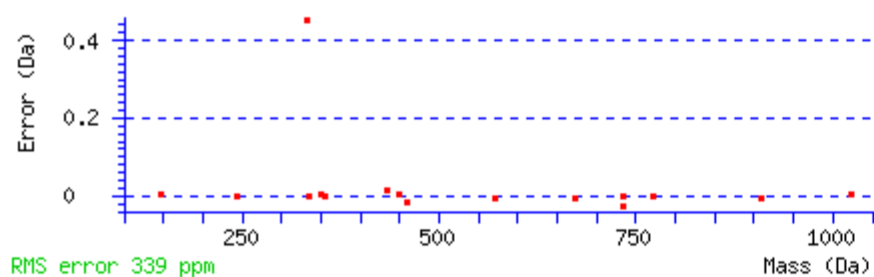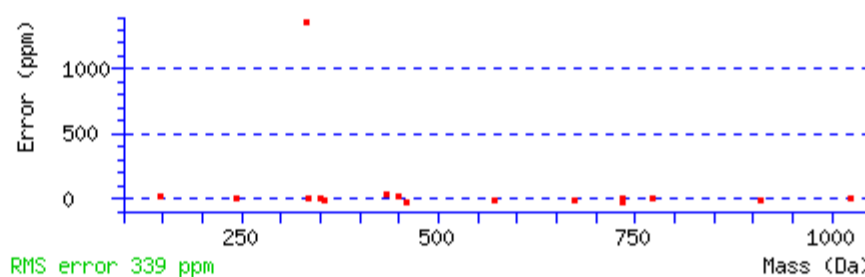

NCBI BLAST search of **VNHVTLSQPK**

(Parameters: blastp, nr protein database, expect=20000, no filter, PAM30)

Other BLAST [web gateways](#)

All matches to this query

| Score | $M_r(\text{calc})$ : | Delta    | Sequence                   |
|-------|----------------------|----------|----------------------------|
| 53.1  | 1121.619308          | 0.002700 | <a href="#">VNHVTLSQPK</a> |

Mascot: <http://www.matrixscience.com/>

# **MATRIX** SCIENCE Mascot Search Results

## Peptide View

MS/MS Fragmentation of **FVDILGLR**

Found in **CTBL1\_HUMAN**, Beta-catenin-like protein 1 OS=Homo sapiens GN=CTNNBL1 PE=1 SV=1

Match to Query 11446: 931.546908 from(466.780730,2+) rtinseconds(3269) index(45848)

Title: Locus:1.1.1.2665.3

Data file 2011-11-14 - TFD - EP 8-2.mgf

Click mouse within plot area to zoom in by factor of two about that point

Or, Plot from  to  Da

Label all possible matches  Label matches used for scoring

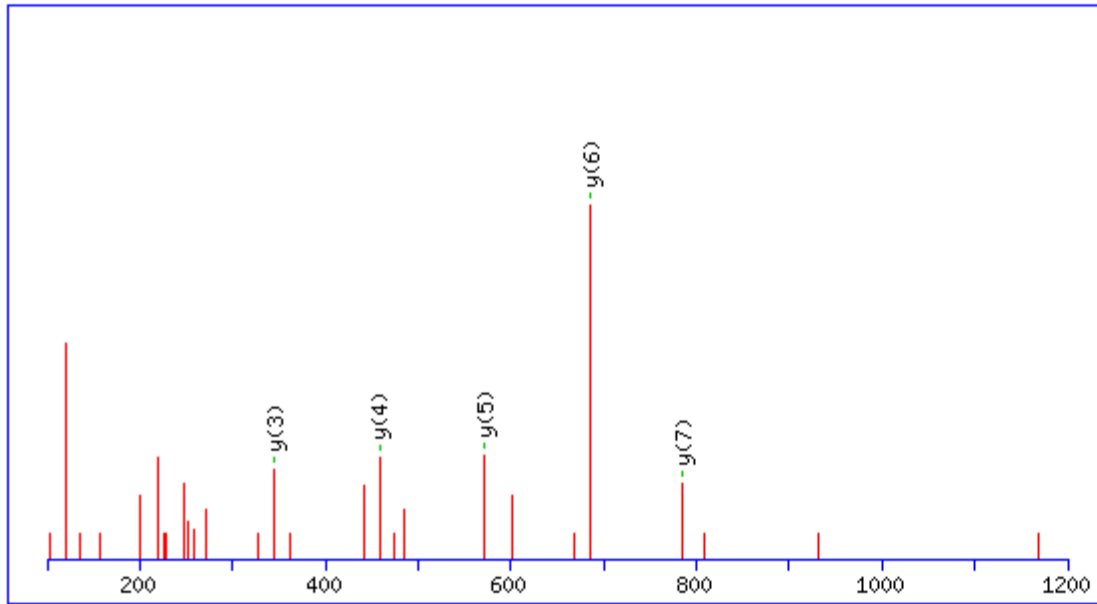

Monoisotopic mass of neutral peptide Mr(calc): 931.549103

Fixed modifications: Propionamide (C) (apply to specified residues or termini only)

Ions Score: 37 Expect: 0.0006

Matches : 5/56 fragment ions using 8 most intense peaks ([help](#))

| # | b          | b <sup>++</sup> | b <sup>0</sup> | b <sup>0++</sup> | Seq. | y          | y <sup>++</sup> | y <sup>*</sup> | y <sup>*++</sup> | y <sup>0</sup> | y <sup>0++</sup> | # |
|---|------------|-----------------|----------------|------------------|------|------------|-----------------|----------------|------------------|----------------|------------------|---|
| 1 | 148.075690 | 74.541483       |                |                  | F    |            |                 |                |                  |                |                  | 8 |
| 2 | 247.144104 | 124.075690      |                |                  | V    | 785.487965 | 393.247621      | 768.461416     | 384.734346       | 767.477400     | 384.242338       | 7 |
| 3 | 362.171047 | 181.589161      | 344.160482     | 172.583879       | D    | 686.419551 | 343.713414      | 669.393002     | 335.200139       | 668.408986     | 334.708131       | 6 |
| 4 | 475.255111 | 238.131193      | 457.244546     | 229.125911       | I    | 571.392608 | 286.199942      | 554.366059     | 277.686668       |                |                  | 5 |
| 5 | 588.339175 | 294.673226      | 570.328610     | 285.667943       | L    | 458.308544 | 229.657910      | 441.281995     | 221.144635       |                |                  | 4 |
| 6 | 645.360639 | 323.183958      | 627.350074     | 314.178675       | G    | 345.224480 | 173.115878      | 328.197931     | 164.602603       |                |                  | 3 |
| 7 | 758.444703 | 379.725990      | 740.434138     | 370.720707       | L    | 288.203016 | 144.605146      | 271.176467     | 136.091871       |                |                  | 2 |
| 8 |            |                 |                |                  | R    | 175.118952 | 88.063114       | 158.092403     | 79.549839        |                |                  | 1 |

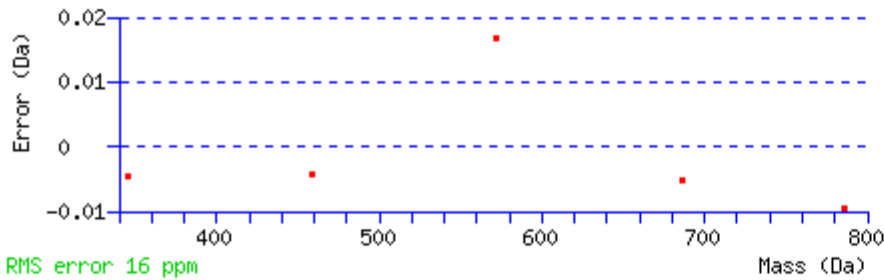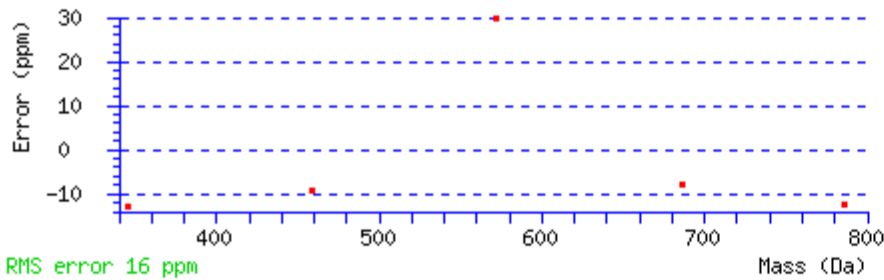

NCBI BLAST search of [FVDILGLR](#)

(Parameters: blastp, nr protein database, expect=20000, no filter, PAM30)

Other BLAST [web gateways](#)

All matches to this query

| Score | Mr(calc):  | Delta     | Sequence                 |
|-------|------------|-----------|--------------------------|
| 37.4  | 931.549103 | -0.002195 | <a href="#">FVDILGLR</a> |



# Mascot Search Results

## Peptide View

MS/MS Fragmentation of **IILYENPNFTGK**

Found in **CRBB2\_HUMAN**, Beta-crystallin B2 OS=Homo sapiens GN=CRYBB2 PE=1 SV=2

Match to Query 41431: 1407.732668 from(704.873610,2+) rtinseconds(2656) index(33474)

Title: Locus:1.1.1.2326.43

Data file 2011-11-10 - TFD - EP 4-5.mgf

Click mouse within plot area to zoom in by factor of two about that point

Or, Plot from  to  Da

Label all possible matches  Label matches used for scoring

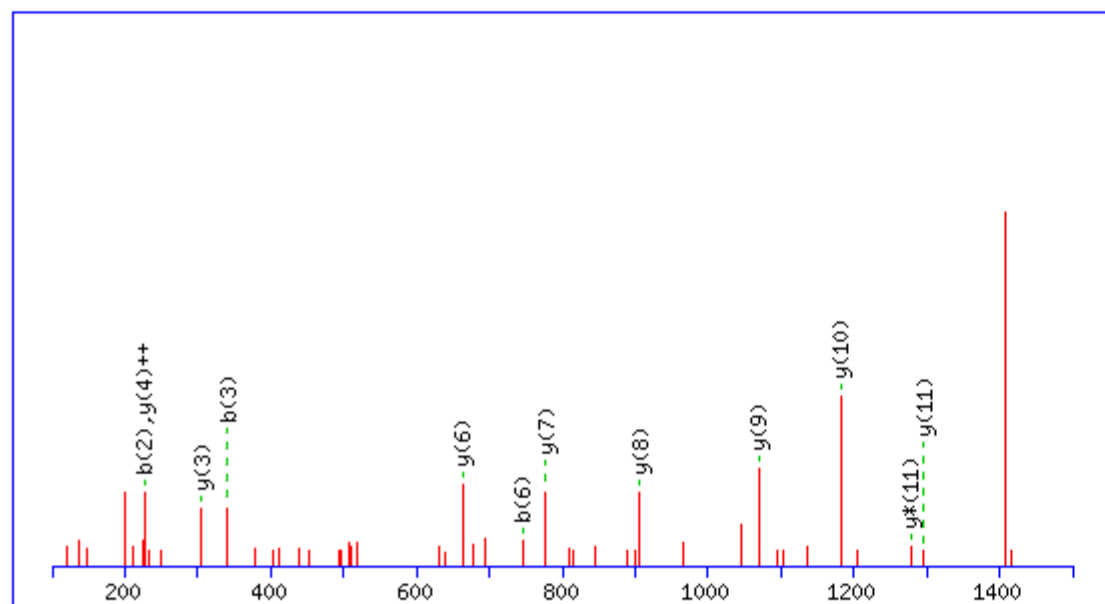

Monoisotopic mass of neutral peptide Mr(calc): 1407.739792

Fixed modifications: Propionamide (C) (apply to specified residues or termini only)

Ions Score: 45 Expect: 0.00028

Matches : 12/110 fragment ions using 21 most intense peaks [\(help\)](#)

| #  | b                 | b <sup>++</sup> | b <sup>*</sup> | b <sup>+++</sup> | b <sup>0</sup> | b <sup>0++</sup> | Seq. | y                  | y <sup>++</sup>   | y <sup>*</sup>     | y <sup>+++</sup> | y <sup>0</sup> | y <sup>0++</sup> | #  |
|----|-------------------|-----------------|----------------|------------------|----------------|------------------|------|--------------------|-------------------|--------------------|------------------|----------------|------------------|----|
| 1  | 114.091340        | 57.549308       |                |                  |                |                  | I    |                    |                   |                    |                  |                |                  | 12 |
| 2  | <b>227.175404</b> | 114.091340      |                |                  |                |                  | I    | <b>1295.663029</b> | 648.335153        | <b>1278.636480</b> | 639.821878       | 1277.652464    | 639.329870       | 11 |
| 3  | <b>340.259468</b> | 170.633372      |                |                  |                |                  | L    | <b>1182.578965</b> | 591.793120        | 1165.552416        | 583.279846       | 1164.568400    | 582.787838       | 10 |
| 4  | 503.322797        | 252.165036      |                |                  |                |                  | Y    | <b>1069.494901</b> | 535.251089        | 1052.468352        | 526.737814       | 1051.484336    | 526.245806       | 9  |
| 5  | 632.365390        | 316.686333      |                |                  | 614.354825     | 307.681051       | E    | <b>906.431572</b>  | 453.719424        | 889.405023         | 445.206149       | 888.421007     | 444.714141       | 8  |
| 6  | <b>746.408317</b> | 373.707797      | 729.381768     | 365.194522       | 728.397752     | 364.702514       | N    | <b>777.388979</b>  | 389.198128        | 760.362430         | 380.684853       | 759.378414     | 380.192845       | 7  |
| 7  | 843.461081        | 422.234179      | 826.434532     | 413.720904       | 825.450516     | 413.228896       | P    | <b>663.346052</b>  | 332.176664        | 646.319503         | 323.663389       | 645.335487     | 323.171382       | 6  |
| 8  | 957.504008        | 479.255642      | 940.477459     | 470.742368       | 939.493443     | 470.250360       | N    | 566.293288         | 283.650282        | 549.266739         | 275.137007       | 548.282723     | 274.644999       | 5  |
| 9  | 1104.572422       | 552.789849      | 1087.545873    | 544.276575       | 1086.561857    | 543.784566       | F    | 452.250361         | <b>226.628818</b> | 435.223812         | 218.115544       | 434.239796     | 217.623536       | 4  |
| 10 | 1205.620101       | 603.313689      | 1188.593552    | 594.800414       | 1187.609536    | 594.308406       | T    | <b>305.181947</b>  | 153.094611        | 288.155398         | 144.581337       | 287.171382     | 144.089329       | 3  |
| 11 | 1262.641565       | 631.824420      | 1245.615016    | 623.311146       | 1244.631000    | 622.819138       | G    | 204.134268         | 102.570772        | 187.107719         | 94.057497        |                |                  | 2  |
| 12 |                   |                 |                |                  |                |                  | K    | 147.112804         | 74.060040         | 130.086255         | 65.546765        |                |                  | 1  |

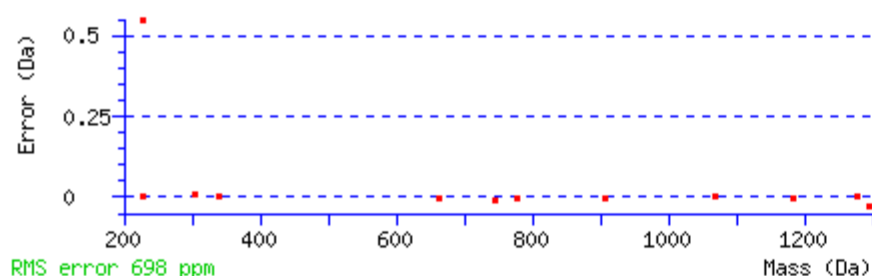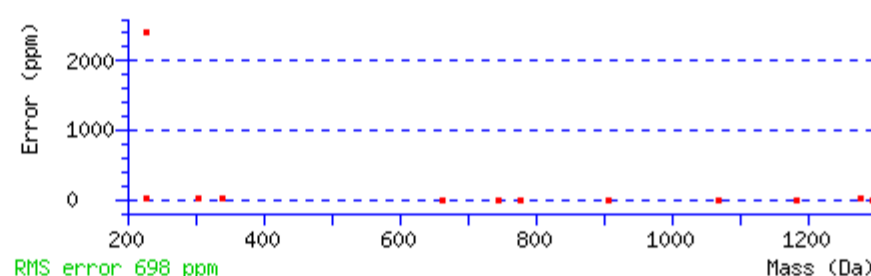

NCBI BLAST search of [IILYENPNFTGK](#)

(Parameters: blastp, nr protein database, expect=20000, no filter, PAM30)

Other BLAST [web gateways](#)

All matches to this query

| Score | Mr(calc):   | Delta     | Sequence                     |
|-------|-------------|-----------|------------------------------|
| 44.9  | 1407.739792 | -0.007124 | <a href="#">IILYENPNFTGK</a> |

Mascot: <http://www.matrixscience.com/>

# {MATRIX} SCIENCE Mascot Search Results

## Peptide View

MS/MS Fragmentation of **EQQILTLFR**

Found in **LACB2\_HUMAN**, Beta-lactamase-like protein 2 OS=Homo sapiens GN=LACTB2 PE=1 SV=2

Match to Query 25475: 1146.643428 from(574.328990,2+) rtinseconds(3197) index(45637)

Title: Locus:1.1.1.2542.8

Data file 2011-11-10 - TFD - EP 4-4.mgf

Click mouse within plot area to zoom in by factor of two about that point

Or, Plot from  to  Da

Label all possible matches  Label matches used for scoring

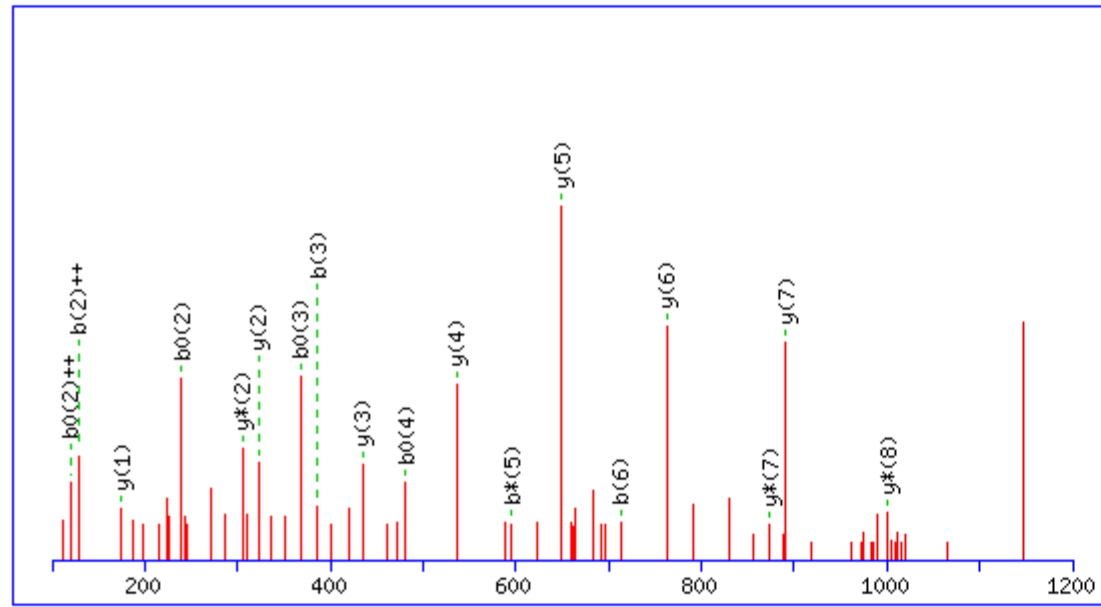

Monoisotopic mass of neutral peptide Mr(calc): 1146.639694

Fixed modifications: Propionamide (C) (apply to specified residues or termini only)

Ions Score: 45 Expect: 0.00017

Matches : 18/88 fragment ions using 30 most intense peaks [\(help\)](#)

| # | b          | b <sup>++</sup> | b <sup>+</sup> | b <sup>+++</sup> | b <sup>0</sup> | b <sup>0++</sup> | Seq. | y           | y <sup>++</sup> | y <sup>+</sup> | y <sup>+++</sup> | y <sup>0</sup> | y <sup>0++</sup> | # |
|---|------------|-----------------|----------------|------------------|----------------|------------------|------|-------------|-----------------|----------------|------------------|----------------|------------------|---|
| 1 | 130.049869 | 65.528572       |                |                  | 112.039304     | 56.523290        | E    |             |                 |                |                  |                |                  | 9 |
| 2 | 258.108447 | 129.557862      | 241.081898     | 121.044587       | 240.097882     | 120.552579       | Q    | 1018.604393 | 509.805835      | 1001.577844    | 501.292560       | 1000.593828    | 500.800552       | 8 |
| 3 | 386.167025 | 193.587151      | 369.140476     | 185.073876       | 368.156460     | 184.581868       | Q    | 890.545815  | 445.776546      | 873.519266     | 437.263271       | 872.535250     | 436.771263       | 7 |
| 4 | 499.251089 | 250.129183      | 482.224540     | 241.615908       | 481.240524     | 241.123900       | I    | 762.487237  | 381.747257      | 745.460688     | 373.233982       | 744.476672     | 372.741974       | 6 |
| 5 | 612.335153 | 306.671215      | 595.308604     | 298.157940       | 594.324588     | 297.665932       | L    | 649.403173  | 325.205225      | 632.376624     | 316.691950       | 631.392608     | 316.199942       | 5 |
| 6 | 713.382832 | 357.195054      | 696.356283     | 348.681780       | 695.372267     | 348.189772       | T    | 536.319109  | 268.663193      | 519.292560     | 260.149918       | 518.308544     | 259.657910       | 4 |
| 7 | 826.466896 | 413.737086      | 809.440347     | 405.223812       | 808.456331     | 404.731804       | L    | 435.271430  | 218.139353      | 418.244881     | 209.626079       |                |                  | 3 |
| 8 | 973.535310 | 487.271293      | 956.508761     | 478.758019       | 955.524745     | 478.266011       | F    | 322.187366  | 161.597321      | 305.160817     | 153.084047       |                |                  | 2 |
| 9 |            |                 |                |                  |                |                  | R    | 175.118952  | 88.063114       | 158.092403     | 79.549840        |                |                  | 1 |

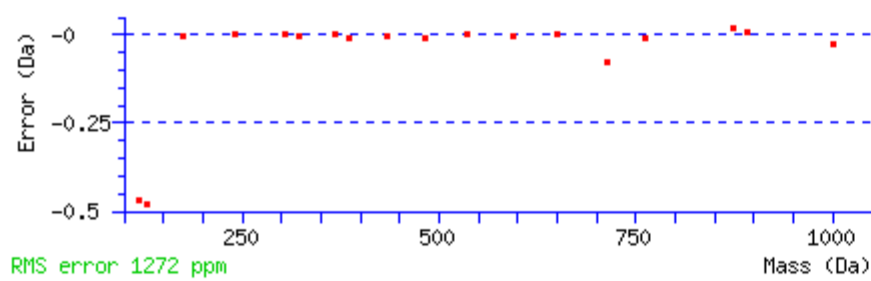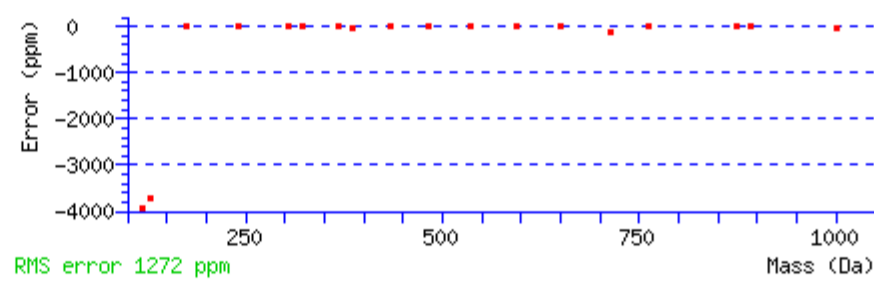

NCBI BLAST search of [EQQILTLFR](#)

(Parameters: blastp, nr protein database, expect=20000, no filter, PAM30)

Other BLAST [web gateways](#)

## All matches to this query

| Score | Mr(calc):   | Delta    | Sequence                     |
|-------|-------------|----------|------------------------------|
| 44.7  | 1146.639694 | 0.003734 | <a href="#">EQQILTLFR</a>    |
| 32.9  | 1146.639694 | 0.003734 | <a href="#">KEQPLFTLR</a>    |
| 3.9   | 1146.635681 | 0.007747 | <a href="#">GTARTSKPTTK</a>  |
| 1.6   | 1146.639679 | 0.003749 | <a href="#">APGAAPPALSAK</a> |
| 0.5   | 1146.639679 | 0.003749 | <a href="#">EPHISLIPNK</a>   |

# MASCOT Search Results

## Peptide View

MS/MS Fragmentation of **GFTGIDSEYEKPEAPELVLK**

Found in **PAPSI\_HUMAN**, Bifunctional 3'-phosphoadenosine 5'-phosphosulfate synthase 1 OS=Homo sapiens GN=PAPSS1 PE=1 SV=2

Match to Query 65396: 2221.120332 from(741.380720,3+) rtinseconds(2915) index(36236)

Title: Locus:1.1.1.2747.39

Data file 2011-11-12 - TFD - EP 5-2.mgf

Click mouse within plot area to zoom in by factor of two about that point

Or, Plot from  to  Da

Label all possible matches  Label matches used for scoring

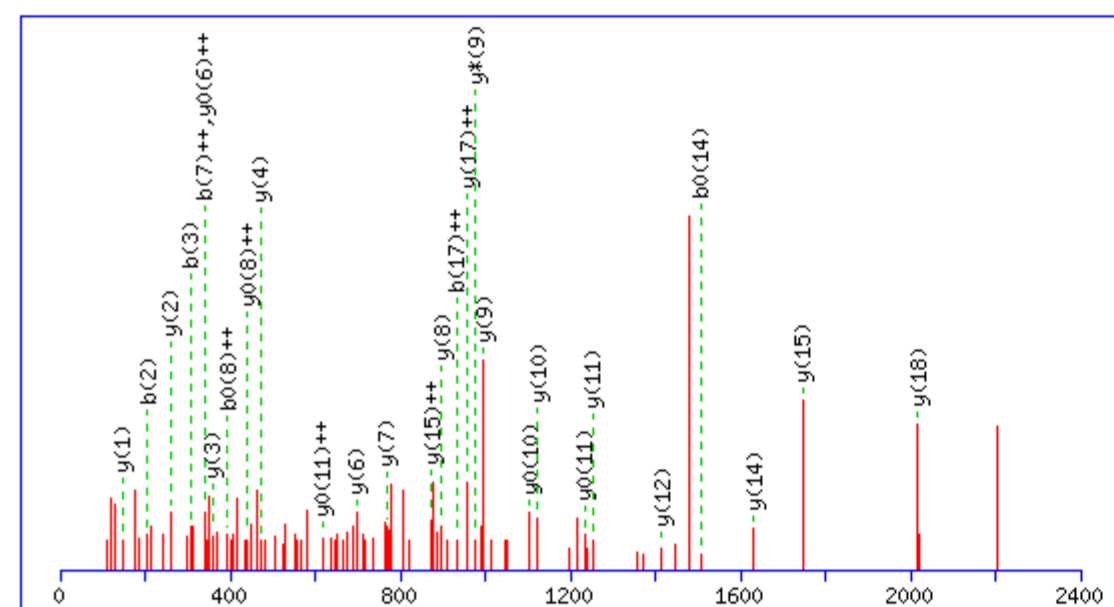

Monoisotopic mass of neutral peptide Mr(calc): 2221.115402

Fixed modifications: Propionamide (C) (apply to specified residues or termini only)

Ions Score: 44 Expect: 0.0005

Matches : 28/196 fragment ions using 85 most intense peaks ([help](#))

| #  | b           | b <sup>++</sup> | b <sup>*</sup> | b <sup>+++</sup> | b <sup>0</sup> | b <sup>0++</sup> | Seq. | y           | y <sup>++</sup> | y <sup>*</sup> | y <sup>+++</sup> | y <sup>0</sup> | y <sup>0++</sup> | #  |
|----|-------------|-----------------|----------------|------------------|----------------|------------------|------|-------------|-----------------|----------------|------------------|----------------|------------------|----|
| 1  | 58.028740   | 29.518008       |                |                  |                |                  | G    |             |                 |                |                  |                |                  | 20 |
| 2  | 205.097154  | 103.052215      |                |                  |                |                  | F    | 2165.101244 | 1083.054260     | 2148.074695    | 1074.540985      | 2147.090679    | 1074.048977      | 19 |
| 3  | 306.144833  | 153.576055      |                |                  | 288.134268     | 144.570772       | T    | 2018.032830 | 1009.520053     | 2001.006281    | 1001.006779      | 2000.022265    | 1000.514771      | 18 |
| 4  | 363.166297  | 182.086786      |                |                  | 345.155732     | 173.081504       | G    | 1916.985151 | 958.996214      | 1899.958602    | 950.482939       | 1898.974586    | 949.990931       | 17 |
| 5  | 476.250361  | 238.628818      |                |                  | 458.239796     | 229.623536       | I    | 1859.963687 | 930.485482      | 1842.937138    | 921.972207       | 1841.953122    | 921.480199       | 16 |
| 6  | 591.277304  | 296.142290      |                |                  | 573.266739     | 287.137008       | D    | 1746.879623 | 873.943450      | 1729.853074    | 865.430175       | 1728.869058    | 864.938167       | 15 |
| 7  | 678.309332  | 339.658304      |                |                  | 660.298767     | 330.653022       | S    | 1631.852680 | 816.429978      | 1614.826131    | 807.916704       | 1613.842115    | 807.424696       | 14 |
| 8  | 807.351925  | 404.179601      |                |                  | 789.341360     | 395.174318       | E    | 1544.820652 | 772.913964      | 1527.794103    | 764.400690       | 1526.810087    | 763.908682       | 13 |
| 9  | 970.415254  | 485.711265      |                |                  | 952.404689     | 476.705983       | Y    | 1415.778059 | 708.392668      | 1398.751510    | 699.879393       | 1397.767494    | 699.387385       | 12 |
| 10 | 1099.457847 | 550.232561      |                |                  | 1081.447282    | 541.227279       | E    | 1252.714730 | 626.861003      | 1235.688181    | 618.347729       | 1234.704165    | 617.855721       | 11 |
| 11 | 1227.552810 | 614.280043      | 1210.526261    | 605.766769       | 1209.542245    | 605.274760       | K    | 1123.672137 | 562.339707      | 1106.645588    | 553.826432       | 1105.661572    | 553.334424       | 10 |
| 12 | 1324.605574 | 662.806425      | 1307.579025    | 654.293151       | 1306.595009    | 653.801142       | P    | 995.577174  | 498.292225      | 978.550625     | 489.778951       | 977.566609     | 489.286943       | 9  |
| 13 | 1453.648167 | 727.327722      | 1436.621618    | 718.814447       | 1435.637602    | 718.322439       | E    | 898.524410  | 449.765843      | 881.497861     | 441.252569       | 880.513845     | 440.760561       | 8  |
| 14 | 1524.685281 | 762.846279      | 1507.658732    | 754.333004       | 1506.674716    | 753.840996       | A    | 769.481817  | 385.244547      | 752.455268     | 376.731272       | 751.471252     | 376.239264       | 7  |
| 15 | 1621.738045 | 811.372661      | 1604.711496    | 802.859386       | 1603.727480    | 802.367378       | P    | 698.444703  | 349.725990      | 681.418154     | 341.212715       | 680.434138     | 340.720707       | 6  |
| 16 | 1750.780638 | 875.893957      | 1733.754089    | 867.380683       | 1732.770073    | 866.888674       | E    | 601.391939  | 301.199608      | 584.365390     | 292.686333       | 583.381374     | 292.194325       | 5  |
| 17 | 1863.864702 | 932.435989      | 1846.838153    | 923.922714       | 1845.854137    | 923.430706       | L    | 472.349346  | 236.678311      | 455.322797     | 228.165037       |                |                  | 4  |
| 18 | 1962.933116 | 981.970196      | 1945.906567    | 973.456922       | 1944.922551    | 972.964913       | V    | 359.265282  | 180.136279      | 342.238733     | 171.623005       |                |                  | 3  |
| 19 | 2076.017180 | 1038.512228     | 2058.990631    | 1029.998953      | 2058.006615    | 1029.506945      | L    | 260.196868  | 130.602072      | 243.170319     | 122.088798       |                |                  | 2  |
| 20 |             |                 |                |                  |                |                  | K    | 147.112804  | 74.060040       | 130.086255     | 65.546765        |                |                  | 1  |

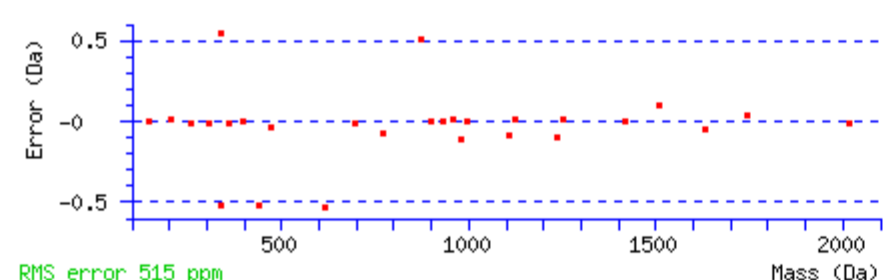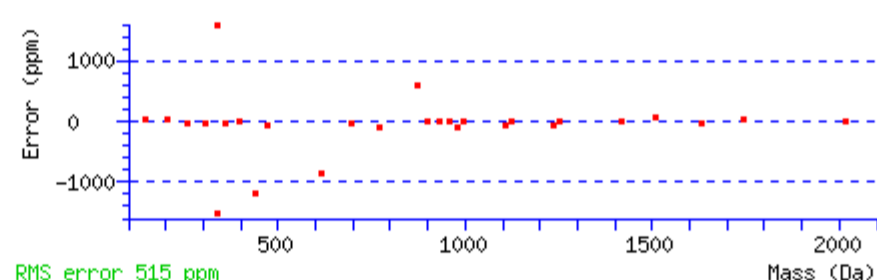

NCBI BLAST search of [GFTGIDSEYEKPEAPELVLK](#)

(Parameters: blastp, nr protein database, expect=20000, no filter, PAM30)

Other BLAST [web gateways](#)

All matches to this query

| Score | Mr(calc):   | Delta    | Sequence                             |
|-------|-------------|----------|--------------------------------------|
| 44.4  | 2221.115402 | 0.004930 | <a href="#">GFTGIDSEYEKPEAPELVLK</a> |

Mascot: <http://www.matrixscience.com/>

# Mascot Search Results

## Peptide View

MS/MS Fragmentation of **LLPELLQPYTER**

Found in **COASY\_HUMAN**, Bifunctional coenzyme A synthase OS=Homo sapiens GN=COASY PE=1 SV=4

Match to Query 43743: 1470.813388 from(736.413970,2+) rtinseconds(3268) index(47008)

Title: Locus:1.1.1.2793.26

Data file 2011-11-13 - TFD - EP 7-3.mgf

Click mouse within plot area to zoom in by factor of two about that point

Or, Plot from  to  Da

Label all possible matches  Label matches used for scoring

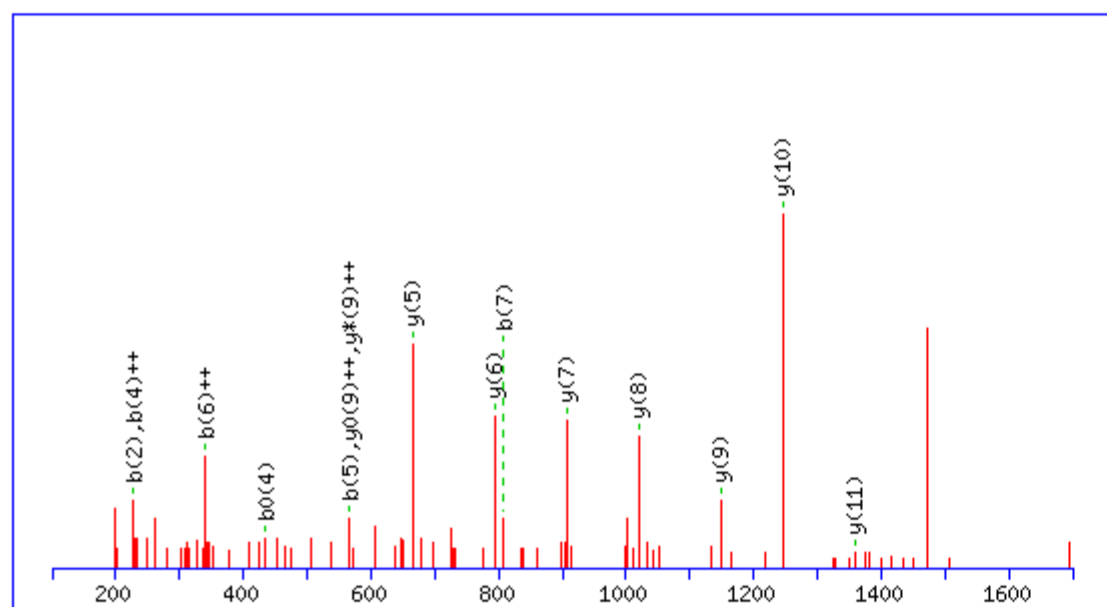

Monoisotopic mass of neutral peptide Mr(calc): 1470.808197

Fixed modifications: Propionamide (C) (apply to specified residues or termini only)

Ions Score: 65 Expect: 1.7e-006

Matches : 15/112 fragment ions using 13 most intense peaks [\(help\)](#)

| #  | b                 | b <sup>++</sup>   | b <sup>*</sup> | b <sup>*++</sup> | b <sup>0</sup>    | b <sup>0++</sup> | Seq. | y                  | y <sup>++</sup> | y <sup>*</sup> | y <sup>*++</sup>  | y <sup>0</sup> | y <sup>0++</sup>  | #  |
|----|-------------------|-------------------|----------------|------------------|-------------------|------------------|------|--------------------|-----------------|----------------|-------------------|----------------|-------------------|----|
| 1  | 114.091340        | 57.549308         |                |                  |                   |                  | L    |                    |                 |                |                   |                |                   | 12 |
| 2  | <b>227.175404</b> | 114.091340        |                |                  |                   |                  | L    | <b>1358.731444</b> | 679.869360      | 1341.704895    | 671.356086        | 1340.720879    | 670.864078        | 11 |
| 3  | 324.228168        | 162.617722        |                |                  |                   |                  | P    | <b>1245.647380</b> | 623.327328      | 1228.620831    | 614.814054        | 1227.636815    | 614.322045        | 10 |
| 4  | 453.270761        | <b>227.139018</b> |                |                  | <b>435.260196</b> | 218.133736       | E    | <b>1148.594616</b> | 574.800946      | 1131.568067    | <b>566.287671</b> | 1130.584051    | <b>565.795663</b> | 9  |
| 5  | <b>566.354825</b> | 283.681051        |                |                  | 548.344260        | 274.675768       | L    | <b>1019.552023</b> | 510.279650      | 1002.525474    | 501.766375        | 1001.541458    | 501.274367        | 8  |
| 6  | 679.438889        | <b>340.223083</b> |                |                  | 661.428324        | 331.217800       | L    | <b>906.467959</b>  | 453.737618      | 889.441410     | 445.224343        | 888.457394     | 444.732335        | 7  |
| 7  | <b>807.497467</b> | 404.252372        | 790.470918     | 395.739097       | 789.486902        | 395.247089       | Q    | <b>793.383895</b>  | 397.195585      | 776.357346     | 388.682311        | 775.373330     | 388.190303        | 6  |
| 8  | 904.550231        | 452.778754        | 887.523682     | 444.265479       | 886.539666        | 443.773471       | P    | <b>665.325317</b>  | 333.166296      | 648.298768     | 324.653022        | 647.314752     | 324.161014        | 5  |
| 9  | 1067.613560       | 534.310418        | 1050.587011    | 525.797144       | 1049.602995       | 525.305136       | Y    | 568.272553         | 284.639914      | 551.246004     | 276.126640        | 550.261988     | 275.634632        | 4  |
| 10 | 1168.661239       | 584.834258        | 1151.634690    | 576.320983       | 1150.650674       | 575.828975       | T    | 405.209224         | 203.108250      | 388.182675     | 194.594975        | 387.198659     | 194.102967        | 3  |
| 11 | 1297.703832       | 649.355554        | 1280.677283    | 640.842280       | 1279.693267       | 640.350271       | E    | 304.161545         | 152.584410      | 287.134996     | 144.071136        | 286.150980     | 143.579128        | 2  |
| 12 |                   |                   |                |                  |                   |                  | R    | 175.118952         | 88.063114       | 158.092403     | 79.549839         |                |                   | 1  |

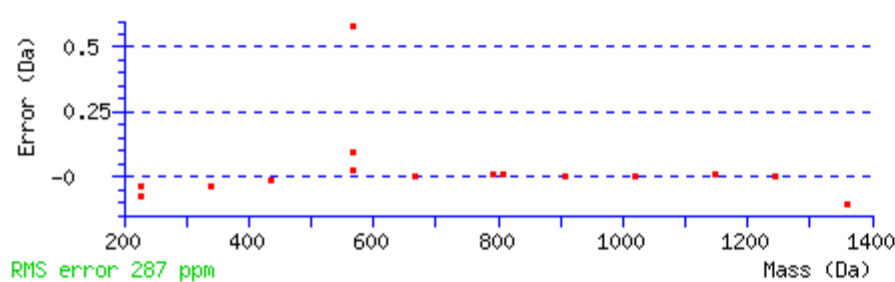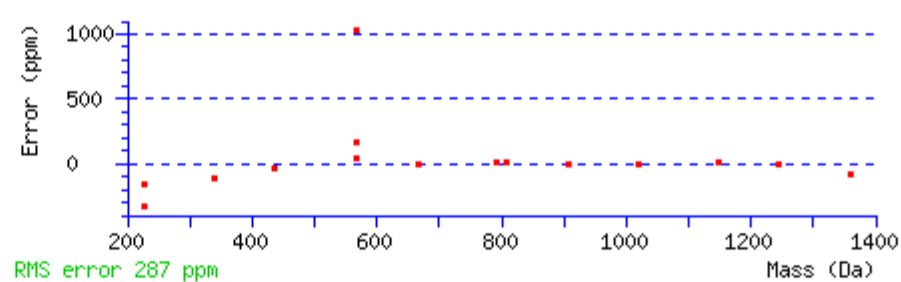

NCBI BLAST search of **LLPELLQPYTER**

(Parameters: blastp, nr protein database, expect=20000, no filter, PAM30)

Other BLAST [web gateways](#)

All matches to this query

| Score | Mr(calc):   | Delta    | Sequence                      |
|-------|-------------|----------|-------------------------------|
| 65.0  | 1470.808197 | 0.005191 | <a href="#">LLPELLQPYTER</a>  |
| 7.1   | 1470.811584 | 0.001804 | <a href="#">LLLLDLPIQLMDR</a> |
| 3.7   | 1470.801697 | 0.011691 | <a href="#">LLIVTQTPHYMR</a>  |

Mascot: <http://www.matrixscience.com/>

# MASCOT SCIENCE Mascot Search Results

## Peptide View

MS/MS Fragmentation of **LLPGIEVLWTGPK**

Found in **NCOAT\_HUMAN**, Bifunctional protein NCOAT OS=Homo sapiens GN=MGEA5 PE=1 SV=2

Match to Query 42606: 1421.824868 from(711.919710,2+) rtinseconds(3901) index(58269)

Title: Locus:1.1.1.2785.30

Data file 2011-11-12 - TFD - EP 6-1.mgf

Click mouse within plot area to zoom in by factor of two about that point

Or, Plot from  to  Da

Label all possible matches  Label matches used for scoring

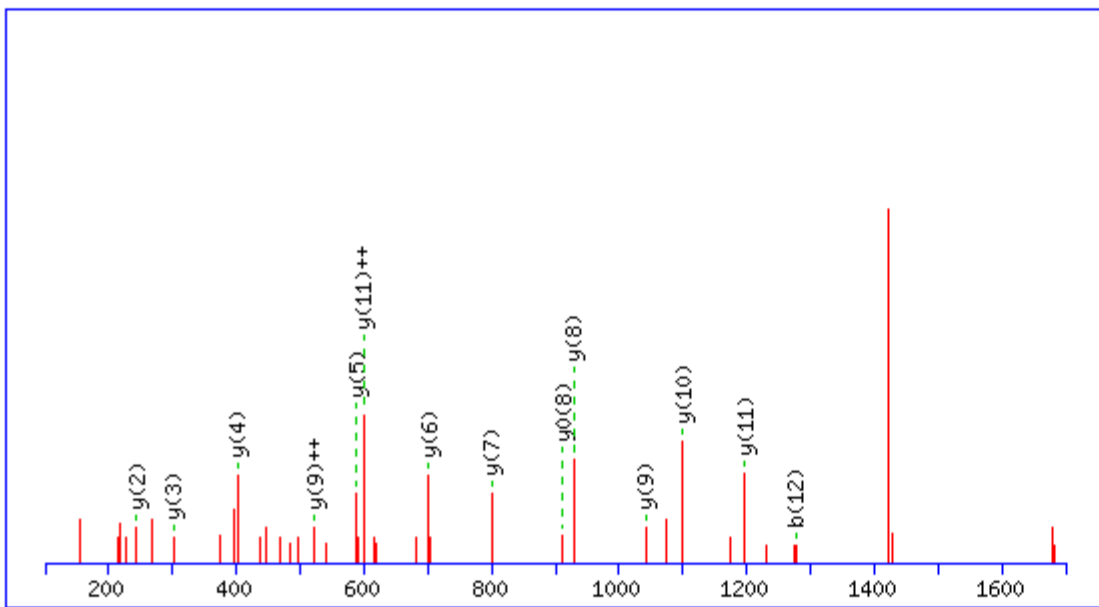

Monoisotopic mass of neutral peptide  $M_r(\text{calc})$ : 1421.828232

Fixed modifications: Propionamide (C) (apply to specified residues or termini only)

Ions Score: 68 Expect: 5.7e-007

Matches : 14/104 fragment ions using 31 most intense peaks [\(help\)](#)

| #  | b           | b <sup>++</sup> | b <sup>0</sup> | b <sup>0++</sup> | Seq. | y           | y <sup>++</sup> | y <sup>*</sup> | y <sup>*++</sup> | y <sup>0</sup> | y <sup>0++</sup> | #  |
|----|-------------|-----------------|----------------|------------------|------|-------------|-----------------|----------------|------------------|----------------|------------------|----|
| 1  | 114.091340  | 57.549308       |                |                  | L    |             |                 |                |                  |                |                  | 13 |
| 2  | 227.175404  | 114.091340      |                |                  | L    | 1309.751451 | 655.379364      | 1292.724902    | 646.866089       | 1291.740886    | 646.374081       | 12 |
| 3  | 324.228168  | 162.617722      |                |                  | P    | 1196.667387 | 598.837332      | 1179.640838    | 590.324057       | 1178.656822    | 589.832049       | 11 |
| 4  | 381.249632  | 191.128454      |                |                  | G    | 1099.614623 | 550.310949      | 1082.588074    | 541.797675       | 1081.604058    | 541.305667       | 10 |
| 5  | 494.333696  | 247.670486      |                |                  | I    | 1042.593159 | 521.800218      | 1025.566610    | 513.286943       | 1024.582594    | 512.794935       | 9  |
| 6  | 623.376289  | 312.191783      | 605.365724     | 303.186500       | E    | 929.509095  | 465.258186      | 912.482546     | 456.744911       | 911.498530     | 456.252903       | 8  |
| 7  | 722.444703  | 361.725990      | 704.434138     | 352.720707       | V    | 800.466502  | 400.736889      | 783.439953     | 392.223615       | 782.455937     | 391.731607       | 7  |
| 8  | 835.528767  | 418.268022      | 817.518202     | 409.262739       | L    | 701.398088  | 351.202682      | 684.371539     | 342.689408       | 683.387523     | 342.197400       | 6  |
| 9  | 1021.608080 | 511.307678      | 1003.597515    | 502.302395       | W    | 588.314024  | 294.660650      | 571.287475     | 286.147376       | 570.303459     | 285.655368       | 5  |
| 10 | 1122.655759 | 561.831518      | 1104.645194    | 552.826235       | T    | 402.234711  | 201.620993      | 385.208162     | 193.107719       | 384.224146     | 192.615711       | 4  |
| 11 | 1179.677223 | 590.342249      | 1161.666658    | 581.336967       | G    | 301.187032  | 151.097154      | 284.160483     | 142.583879       |                |                  | 3  |
| 12 | 1276.729987 | 638.868631      | 1258.719422    | 629.863349       | P    | 244.165568  | 122.586422      | 227.139019     | 114.073148       |                |                  | 2  |
| 13 |             |                 |                |                  | K    | 147.112804  | 74.060040       | 130.086255     | 65.546765        |                |                  | 1  |

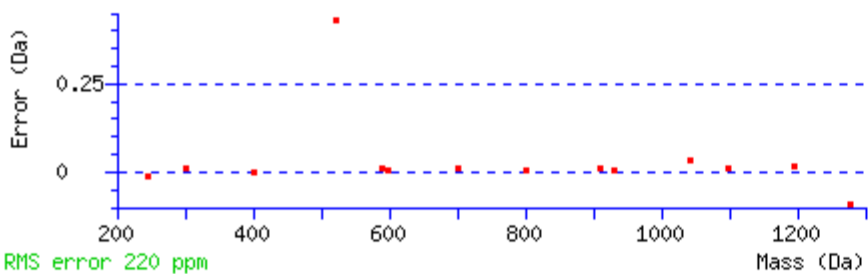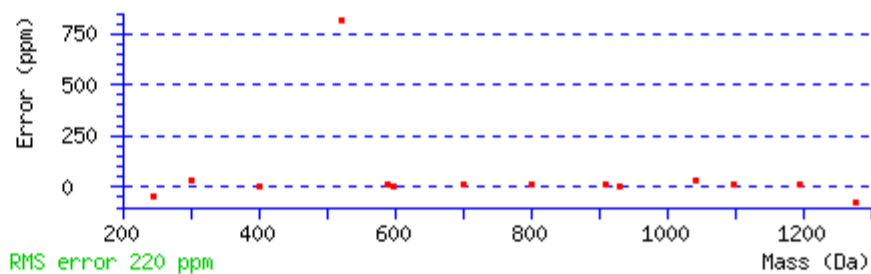

NCBI BLAST search of [LLPGIEVLWTGPK](#)

(Parameters: blastp, nr protein database, expect=20000, no filter, PAM30)

Other BLAST [web gateways](#)

## All matches to this query

| Score | $M_r(\text{calc})$ : | Delta     | Sequence                      |
|-------|----------------------|-----------|-------------------------------|
| 67.7  | 1421.828232          | -0.003364 | <a href="#">LLPGIEVLWTGPK</a> |

Mascot: <http://www.matrixscience.com/>

**Peptide View**

MS/MS Fragmentation of **LAPIMFGIK**

Found in **GLCNE\_HUMAN**, Bifunctional UDP-N-acetylglucosamine 2-epimerase/N-acetylmannosamine kinase OS=Homo sapiens GN=GNE PE=1 SV=1

Match to Query 14377: 1020.577368 from(511.295960,2+) rtinseconds(3020) index(42651)  
 Title: Locus:1.1.1.2568.6  
 Data file 2011-11-10 - TFD - EP 3-3.mgf

Click mouse within plot area to zoom in by factor of two about that point

Or,   to  Da

Label all possible matches  Label matches used for scoring

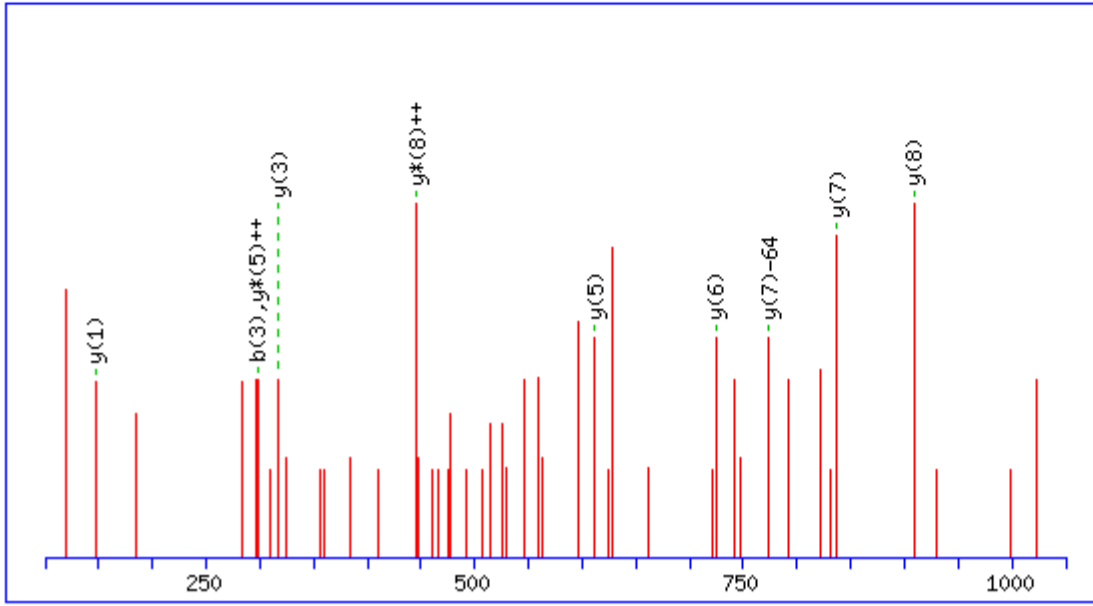

**Monoisotopic mass of neutral peptide Mr(calc): 1020.567780**  
**Fixed modifications:** Propionamide (C) (apply to specified residues or termini only)  
**Variable modifications:**  
 P3 : Oxidation (P)  
 M5 : Oxidation (M), with neutral losses 0.000000 (shown in table), 63.998285  
**Ions Score: 35 Expect: 0.0018**  
**Matches : 10/72 fragment ions using 18 most intense peaks** ([help](#))

| # | b                 | b <sup>++</sup> | Seq. | y                 | y <sup>++</sup> | y <sup>*</sup> | y <sup>*++</sup>  | # |
|---|-------------------|-----------------|------|-------------------|-----------------|----------------|-------------------|---|
| 1 | 114.091340        | 57.549308       | L    |                   |                 |                |                   | 9 |
| 2 | 185.128454        | 93.067865       | A    | <b>908.491003</b> | 454.749140      | 891.464454     | <b>446.235865</b> | 8 |
| 3 | <b>298.176133</b> | 149.591704      | P    | <b>837.453889</b> | 419.230583      | 820.427340     | 410.717308        | 7 |
| 4 | 411.260197        | 206.133737      | I    | <b>724.406210</b> | 362.706743      | 707.379661     | 354.193469        | 6 |
| 5 | 558.295597        | 279.651437      | M    | <b>611.322146</b> | 306.164711      | 594.295597     | <b>297.651437</b> | 5 |
| 6 | 705.364011        | 353.185644      | F    | 464.286746        | 232.647011      | 447.260197     | 224.133737        | 4 |
| 7 | 762.385475        | 381.696376      | G    | <b>317.218332</b> | 159.112804      | 300.191783     | 150.599530        | 3 |
| 8 | 875.469539        | 438.238408      | I    | 260.196868        | 130.602072      | 243.170319     | 122.088798        | 2 |
| 9 |                   |                 | K    | <b>147.112804</b> | 74.060040       | 130.086255     | 65.546765         | 1 |

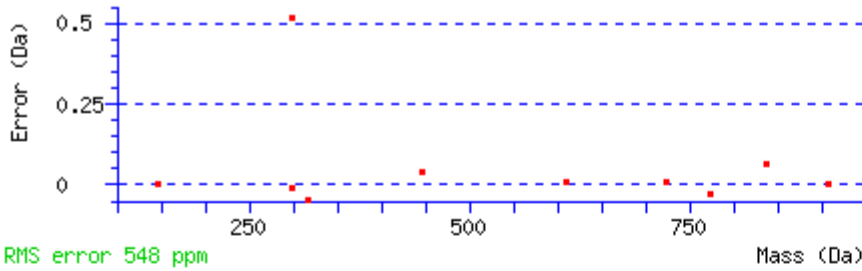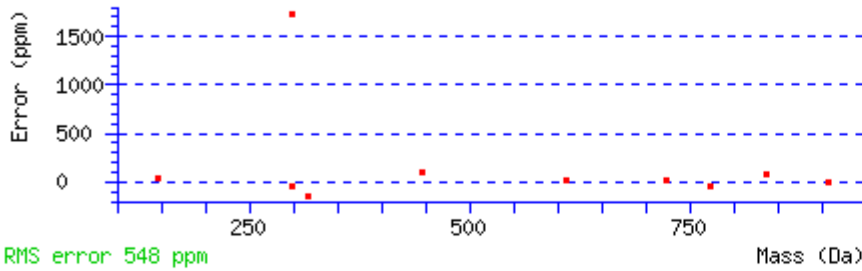

NCBI **BLAST** search of [LAPIMFGIK](#)  
 (Parameters: blastp, nr protein database, expect=20000, no filter, PAM30)  
 Other BLAST [web gateways](#)

**All matches to this query**

| Score | Mr(calc):   | Delta     | Sequence                  |
|-------|-------------|-----------|---------------------------|
| 35.2  | 1020.567780 | 0.009588  | <a href="#">LAPIMFGIK</a> |
| 11.8  | 1020.567764 | 0.009604  | <a href="#">LAIYGMLPK</a> |
| 9.9   | 1020.567764 | 0.009604  | <a href="#">LAIYGMLPK</a> |
| 6.6   | 1020.582855 | -0.005487 | <a href="#">LSPHKVQGR</a> |

# Mascot Search Results

## Peptide View

MS/MS Fragmentation of **GHVEPGEDDLETALR**

Found in **AP4A\_HUMAN**, Bis(5'-nucleosyl)-tetraphosphatase [asymmetrical] OS=Homo sapiens GN=NUDT2 PE=1 SV=3

Match to Query 51737: 1636.766562 from(546.596130,3+) rtinseconds(2230) index(25329)

Title: Locus:1.1.1.2068.22

Data file 2011-11-12 - TFD - EP 5-6.mgf

Click mouse within plot area to zoom in by factor of two about that point

Or, Plot from  to  Da

Label all possible matches  Label matches used for scoring

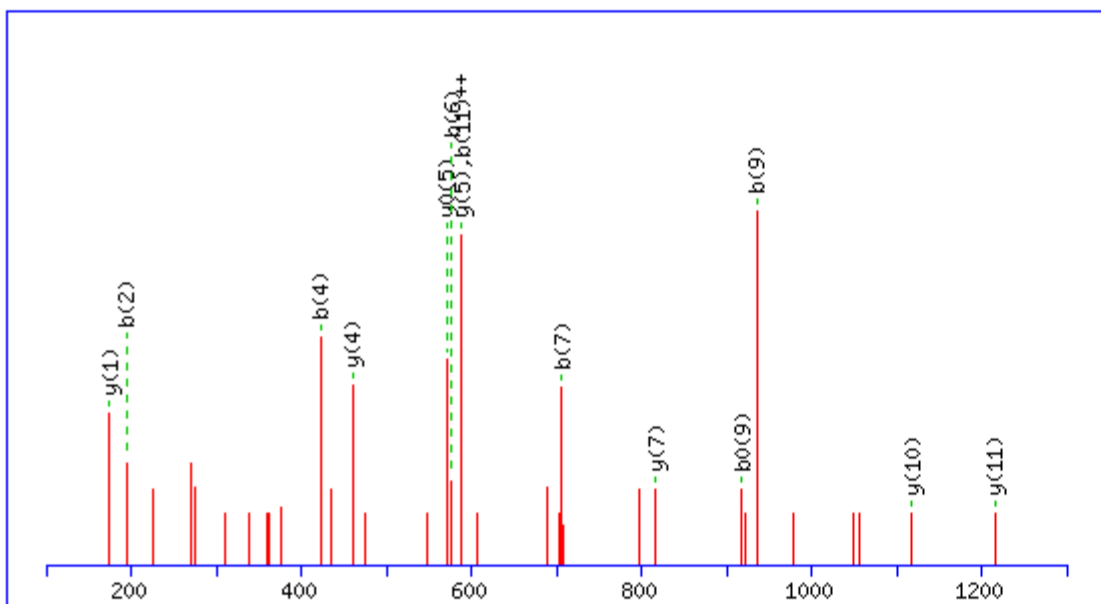

Monoisotopic mass of neutral peptide Mr(calc): 1636.769272

Fixed modifications: Propionamide (C) (apply to specified residues or termini only)

Ions Score: 52 Expect: 6.3e-005

Matches : 14/128 fragment ions using 20 most intense peaks ([help](#))

| #  | b                 | b <sup>++</sup>   | b <sup>0</sup>    | b <sup>0++</sup> | Seq.     | y                  | y <sup>++</sup> | y <sup>*</sup> | y <sup>+++</sup> | y <sup>0</sup>    | y <sup>0++</sup> | #  |
|----|-------------------|-------------------|-------------------|------------------|----------|--------------------|-----------------|----------------|------------------|-------------------|------------------|----|
| 1  | 58.028740         | 29.518008         |                   |                  | <b>G</b> |                    |                 |                |                  |                   |                  | 15 |
| 2  | <b>195.087652</b> | 98.047464         |                   |                  | <b>H</b> | 1580.755092        | 790.881184      | 1563.728543    | 782.367910       | 1562.744527       | 781.875901       | 14 |
| 3  | 294.156066        | 147.581671        |                   |                  | <b>V</b> | 1443.696180        | 722.351728      | 1426.669631    | 713.838453       | 1425.685615       | 713.346445       | 13 |
| 4  | <b>423.198659</b> | 212.102968        | 405.188094        | 203.097685       | <b>E</b> | 1344.627766        | 672.817521      | 1327.601217    | 664.304246       | 1326.617201       | 663.812238       | 12 |
| 5  | 520.251423        | 260.629350        | 502.240858        | 251.624067       | <b>P</b> | <b>1215.585173</b> | 608.296224      | 1198.558624    | 599.782950       | 1197.574608       | 599.290942       | 11 |
| 6  | <b>577.272887</b> | 289.140082        | 559.262322        | 280.134799       | <b>G</b> | <b>1118.532409</b> | 559.769842      | 1101.505860    | 551.256568       | 1100.521844       | 550.764560       | 10 |
| 7  | <b>706.315480</b> | 353.661378        | 688.304915        | 344.656096       | <b>E</b> | 1061.510945        | 531.259110      | 1044.484396    | 522.745836       | 1043.500380       | 522.253828       | 9  |
| 8  | 821.342423        | 411.174850        | 803.331858        | 402.169567       | <b>D</b> | 932.468352         | 466.737814      | 915.441803     | 458.224539       | 914.457787        | 457.732531       | 8  |
| 9  | <b>936.369366</b> | 468.688321        | <b>918.358801</b> | 459.683039       | <b>D</b> | <b>817.441409</b>  | 409.224342      | 800.414860     | 400.711068       | 799.430844        | 400.219060       | 7  |
| 10 | 1049.453430       | 525.230353        | 1031.442865       | 516.225071       | <b>L</b> | 702.414466         | 351.710871      | 685.387917     | 343.197596       | 684.403901        | 342.705588       | 6  |
| 11 | 1178.496023       | <b>589.751649</b> | 1160.485458       | 580.746367       | <b>E</b> | <b>589.330402</b>  | 295.168839      | 572.303853     | 286.655564       | <b>571.319837</b> | 286.163556       | 5  |
| 12 | 1279.543702       | 640.275489        | 1261.533137       | 631.270206       | <b>T</b> | <b>460.287809</b>  | 230.647542      | 443.261260     | 222.134268       | 442.277244        | 221.642260       | 4  |
| 13 | 1350.580816       | 675.794046        | 1332.570251       | 666.788763       | <b>A</b> | 359.240130         | 180.123703      | 342.213581     | 171.610428       |                   |                  | 3  |
| 14 | 1463.664880       | 732.336078        | 1445.654315       | 723.330795       | <b>L</b> | 288.203016         | 144.605146      | 271.176467     | 136.091871       |                   |                  | 2  |
| 15 |                   |                   |                   |                  | <b>R</b> | <b>175.118952</b>  | 88.063114       | 158.092403     | 79.549839        |                   |                  | 1  |

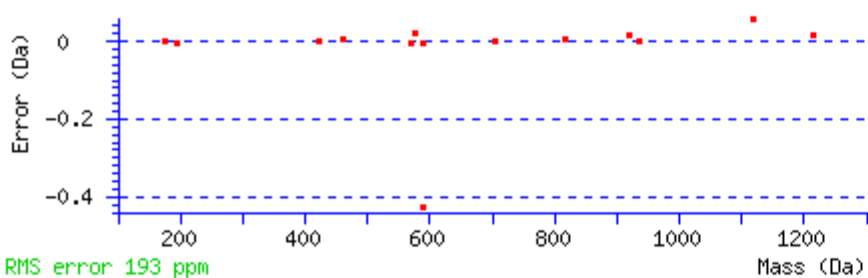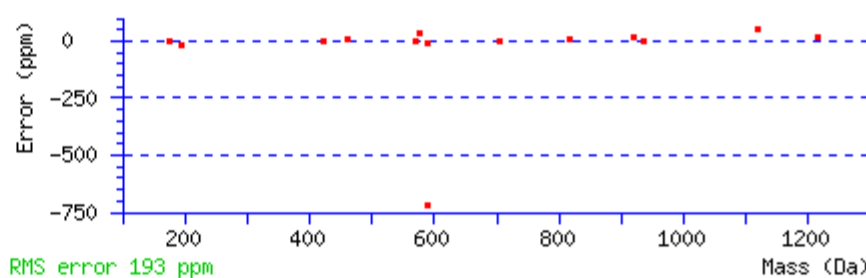

NCBI BLAST search of [GHVEPGEDDLETALR](#)

(Parameters: blastp, nr protein database, expect=20000, no filter, PAM30)

Other BLAST [web gateways](#)

## All matches to this query

| Score | Mr(calc):   | Delta     | Sequence                        |
|-------|-------------|-----------|---------------------------------|
| 51.7  | 1636.769272 | -0.002710 | <a href="#">GHVEPGEDDLETALR</a> |
| 10.2  | 1636.751511 | 0.015051  | <a href="#">DPPPEPSPSKGSPCR</a> |
| 2.9   | 1636.751511 | 0.015051  | <a href="#">DPPPEPSPSKGSPCR</a> |
| 0.8   | 1636.762741 | 0.003821  | <a href="#">MNNGPVLGHEEEVGR</a> |
| 0.7   | 1636.769272 | -0.002710 | <a href="#">SRTAVDGFQSESPEK</a> |
| 0.2   | 1636.776642 | -0.010080 | <a href="#">ELTACIFPTESEAR</a>  |

Mascot: <http://www.matrixscience.com/>

# MASCOT SCIENCE Mascot Search Results

## Peptide View

MS/MS Fragmentation of **IIEDPAR**

Found in **EMAL2\_HUMAN**, Echinoderm microtubule-associated protein-like 2 OS=Homo sapiens GN=EML2 PE=2 SV=1

Match to Query 18545: 812.441168 from(407.227860,2+) rtinseconds(1111) index(413710)

Title: Locus:1.1.1.759.4

Data file C:\Program Files (x86)\Matrix Science\Mascot Daemon\mgf3 TFD - Epitel - R2\mascot\_daemon\_merge.mgf

Click mouse within plot area to zoom in by factor of two about that point

Or, Plot from  to  Da

Label all possible matches  Label matches used for scoring

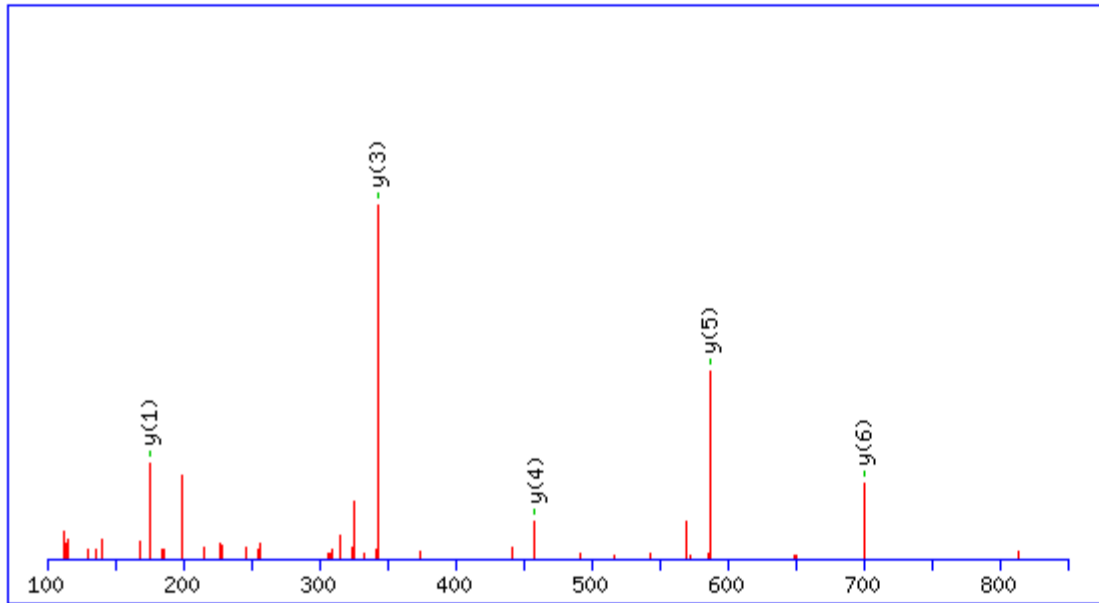

Monoisotopic mass of neutral peptide Mr(calc): 812.439194

Fixed modifications: Carbamidomethyl (C) (apply to specified residues or termini only)

Ions Score: 48 Expect: 9e-005

Matches : 5/50 fragment ions using 6 most intense peaks ([help](#))

| # | b          | b <sup>++</sup> | b <sup>0</sup> | b <sup>0++</sup> | Seq. | y                 | y <sup>++</sup> | y <sup>*</sup> | y <sup>*++</sup> | y <sup>0</sup> | y <sup>0++</sup> | # |
|---|------------|-----------------|----------------|------------------|------|-------------------|-----------------|----------------|------------------|----------------|------------------|---|
| 1 | 114.091340 | 57.549308       |                |                  | I    |                   |                 |                |                  |                |                  | 7 |
| 2 | 227.175404 | 114.091340      |                |                  | I    | <b>700.362430</b> | 350.684853      | 683.335881     | 342.171579       | 682.351865     | 341.679571       | 6 |
| 3 | 356.217997 | 178.612637      | 338.207432     | 169.607354       | E    | <b>587.278366</b> | 294.142821      | 570.251817     | 285.629547       | 569.267801     | 285.137539       | 5 |
| 4 | 471.244940 | 236.126108      | 453.234375     | 227.120826       | D    | <b>458.235773</b> | 229.621524      | 441.209224     | 221.108250       | 440.225208     | 220.616242       | 4 |
| 5 | 568.297704 | 284.652490      | 550.287139     | 275.647208       | P    | <b>343.208830</b> | 172.108053      | 326.182281     | 163.594778       |                |                  | 3 |
| 6 | 639.334818 | 320.171047      | 621.324253     | 311.165765       | A    | 246.156066        | 123.581671      | 229.129517     | 115.068396       |                |                  | 2 |
| 7 |            |                 |                |                  | R    | <b>175.118952</b> | 88.063114       | 158.092403     | 79.549839        |                |                  | 1 |

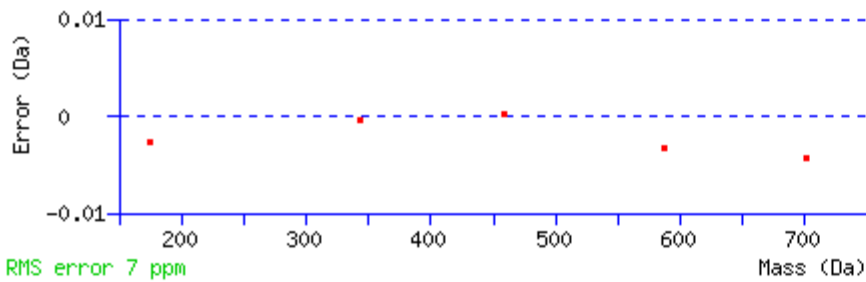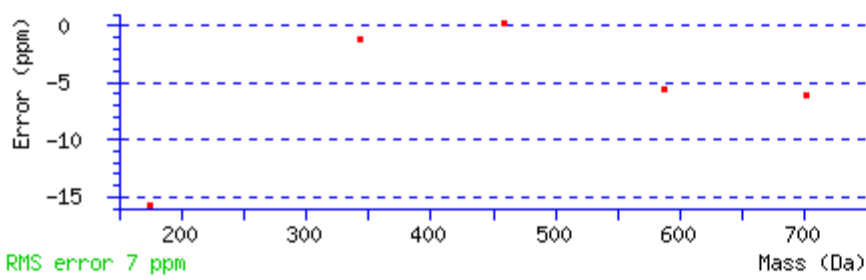

NCBI BLAST search of [IIEDPAR](#)

(Parameters: blastp, nr protein database, expect=20000, no filter, PAM30)

Other BLAST [web gateways](#)

## All matches to this query

| Score | Mr(calc):  | Delta    | Sequence                |
|-------|------------|----------|-------------------------|
| 48.2  | 812.439194 | 0.001974 | <a href="#">IIEDPAR</a> |
| 48.2  | 812.439194 | 0.001974 | <a href="#">LLEDAPR</a> |
| 28.9  | 812.439209 | 0.001959 | <a href="#">LPEIPGR</a> |
| 23.3  | 812.439209 | 0.001959 | <a href="#">LPVAPER</a> |
| 21.1  | 812.439209 | 0.001959 | <a href="#">IPPLGER</a> |
| 15.2  | 812.439209 | 0.001959 | <a href="#">IPVPAER</a> |
| 15.0  | 812.439194 | 0.001974 | <a href="#">ILPAEDR</a> |
| 15.0  | 812.439209 | 0.001959 | <a href="#">LPPDALR</a> |
| 13.1  | 812.439194 | 0.001974 | <a href="#">EPVELAR</a> |
| 8.5   | 812.439194 | 0.001974 | <a href="#">IDLPEAR</a> |



# MASCOT Search Results

## Peptide View

MS/MS Fragmentation of **TVFFWAPIMK**

Found in **BR44\_HUMAN**, Brain protein 44 OS=Homo sapiens GN=BRP44 PE=1 SV=1

Match to Query 28912: 1254.651668 from(628.333110,2+) rtinseconds(3532) index(38051)

Title: Locus:1.1.1.2798.12

Data file 2011-11-13 - TFD - EP 7-7.mgf

Click mouse within plot area to zoom in by factor of two about that point

Or, Plot from  to  Da

Label all possible matches  Label matches used for scoring

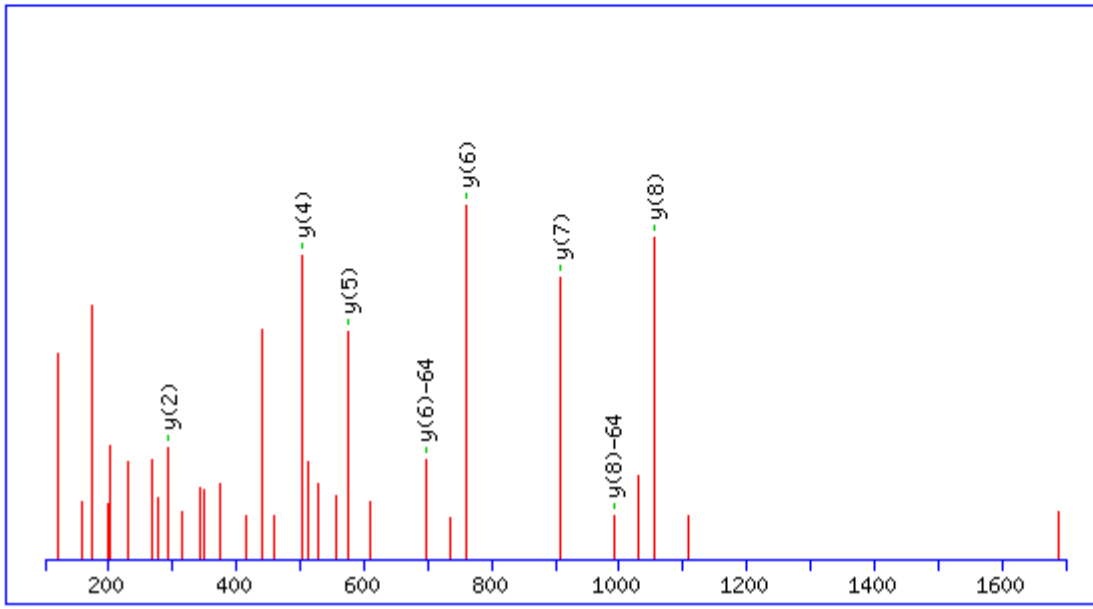

Monoisotopic mass of neutral peptide  $M_r(\text{calc})$ : 1254.647110

Fixed modifications: Propionamide (C) (apply to specified residues or termini only)

Variable modifications:

M9 : Oxidation (M), with neutral losses 0.000000 (shown in table), 63.998285

Ions Score: 50 Expect: 5.3e-005

Matches : 8/108 fragment ions using 10 most intense peaks ([help](#))

| #  | b           | b <sup>++</sup> | b <sup>0</sup> | b <sup>0++</sup> | Seq. | y                  | y <sup>++</sup> | y <sup>*</sup> | y <sup>*++</sup> | #  |
|----|-------------|-----------------|----------------|------------------|------|--------------------|-----------------|----------------|------------------|----|
| 1  | 102.054955  | 51.531116       | 84.044390      | 42.525833        | T    |                    |                 |                |                  | 10 |
| 2  | 201.123369  | 101.065322      | 183.112804     | 92.060040        | V    | 1154.606701        | 577.806988      | 1137.580152    | 569.293714       | 9  |
| 3  | 348.191783  | 174.599529      | 330.181218     | 165.594247       | F    | <b>1055.538287</b> | 528.272781      | 1038.511738    | 519.759507       | 8  |
| 4  | 495.260197  | 248.133737      | 477.249632     | 239.128454       | F    | <b>908.469873</b>  | 454.738575      | 891.443324     | 446.225300       | 7  |
| 5  | 681.339510  | 341.173393      | 663.328945     | 332.168111       | W    | <b>761.401459</b>  | 381.204367      | 744.374910     | 372.691093       | 6  |
| 6  | 752.376624  | 376.691950      | 734.366059     | 367.686668       | A    | <b>575.322146</b>  | 288.164711      | 558.295597     | 279.651436       | 5  |
| 7  | 849.429388  | 425.218332      | 831.418823     | 416.213050       | P    | <b>504.285032</b>  | 252.646154      | 487.258483     | 244.132879       | 4  |
| 8  | 962.513452  | 481.760364      | 944.502887     | 472.755082       | I    | 407.232268         | 204.119772      | 390.205719     | 195.606497       | 3  |
| 9  | 1109.548852 | 555.278064      | 1091.538287    | 546.272781       | M    | <b>294.148204</b>  | 147.577740      | 277.121655     | 139.064465       | 2  |
| 10 |             |                 |                |                  | K    | 147.112804         | 74.060040       | 130.086255     | 65.546765        | 1  |

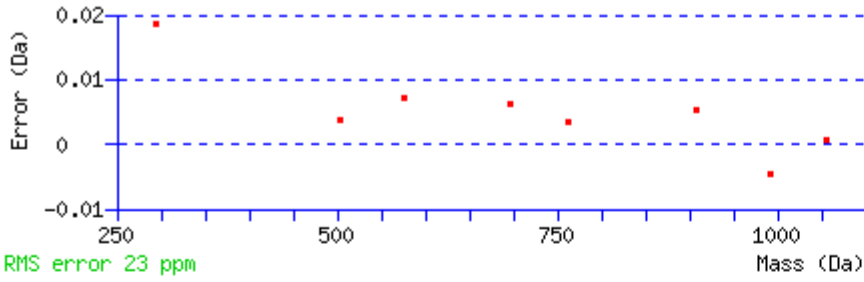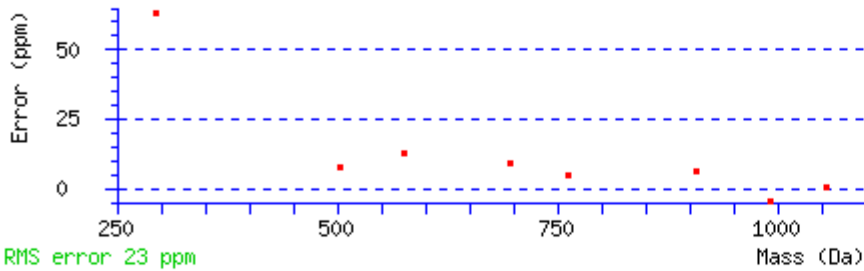

NCBI BLAST search of [TVFFWAPIMK](#)

(Parameters: blastp, nr protein database, expect=20000, no filter, PAM30)

Other BLAST [web gateways](#)

All matches to this query

| Score | $M_r(\text{calc})$ : | Delta    | Sequence                    |
|-------|----------------------|----------|-----------------------------|
| 50.3  | 1254.647110          | 0.004558 | <a href="#">TVFFWAPIMK</a>  |
| 32.1  | 1254.647110          | 0.004558 | <a href="#">TVFFWAPIMK</a>  |
| 4.7   | 1254.650940          | 0.000728 | <a href="#">LHPFDAGKWGK</a> |

# MASCOT Search Results

## Peptide View

### MS/MS Fragmentation of **SPEIISGR**

Found in **BR44L\_HUMAN**, Brain protein 44-like protein OS=Homo sapiens GN=BRP44L PE=1 SV=1

Match to Query 4874: 857.466408 from(429.740480,2+) rtinseconds(1360) index(5353)

Title: Locus:1.1.1.1924.10

Data file 2011-11-10 - TFD - EP 3-7.mgf

Click mouse within plot area to zoom in by factor of two about that point

Or, Plot from  to  Da

Label all possible matches  Label matches used for scoring

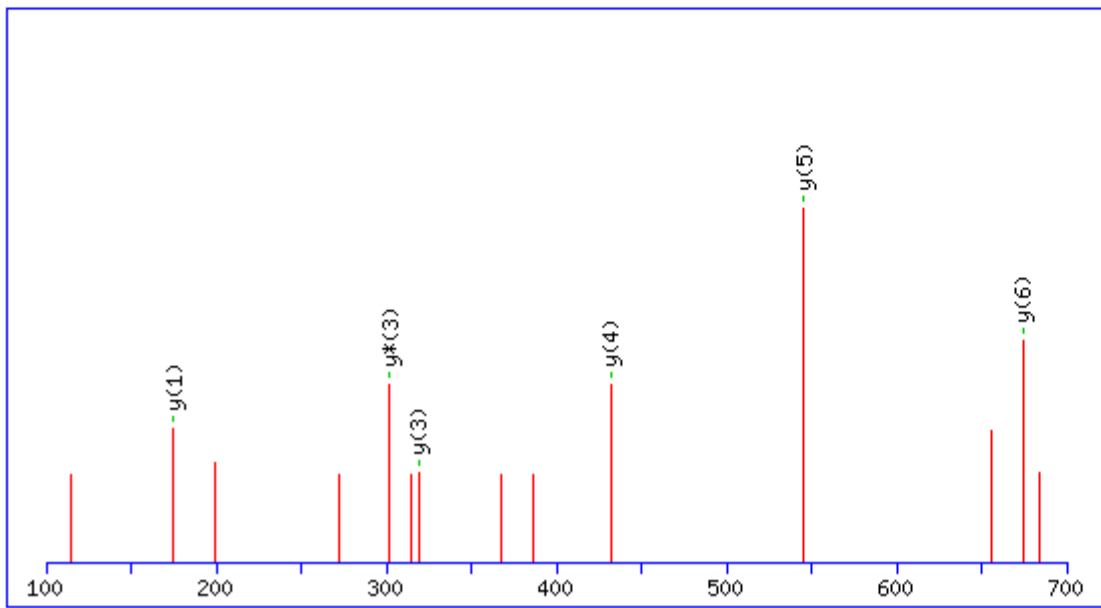

Monoisotopic mass of neutral peptide  $M_r(\text{calc})$ : 857.460663

Fixed modifications: Propionamide (C) (apply to specified residues or termini only)

Ions Score: 54 Expect: 8.3e-005

Matches : 6/66 fragment ions using 6 most intense peaks [\(help\)](#)

| # | b          | b <sup>++</sup> | b <sup>0</sup> | b <sup>0++</sup> | Seq. | y                 | y <sup>++</sup> | y <sup>*</sup>    | y <sup>*++</sup> | y <sup>0</sup> | y <sup>0++</sup> | # |
|---|------------|-----------------|----------------|------------------|------|-------------------|-----------------|-------------------|------------------|----------------|------------------|---|
| 1 | 88.039304  | 44.523290       | 70.028739      | 35.518008        | S    |                   |                 |                   |                  |                |                  | 8 |
| 2 | 185.092068 | 93.049672       | 167.081503     | 84.044389        | P    | 771.435929        | 386.221603      | 754.409380        | 377.708328       | 753.425364     | 377.216320       | 7 |
| 3 | 314.134661 | 157.570968      | 296.124096     | 148.565686       | E    | <b>674.383165</b> | 337.695221      | 657.356616        | 329.181946       | 656.372600     | 328.689938       | 6 |
| 4 | 427.218725 | 214.113001      | 409.208160     | 205.107718       | I    | <b>545.340572</b> | 273.173924      | 528.314023        | 264.660650       | 527.330007     | 264.168642       | 5 |
| 5 | 540.302789 | 270.655033      | 522.292224     | 261.649750       | I    | <b>432.256508</b> | 216.631892      | 415.229959        | 208.118617       | 414.245943     | 207.626609       | 4 |
| 6 | 627.334817 | 314.171047      | 609.324252     | 305.165764       | S    | <b>319.172444</b> | 160.089860      | <b>302.145895</b> | 151.576585       | 301.161879     | 151.084577       | 3 |
| 7 | 684.356281 | 342.681779      | 666.345716     | 333.676496       | G    | 232.140416        | 116.573846      | 215.113867        | 108.060571       |                |                  | 2 |
| 8 |            |                 |                |                  | R    | <b>175.118952</b> | 88.063114       | 158.092403        | 79.549839        |                |                  | 1 |

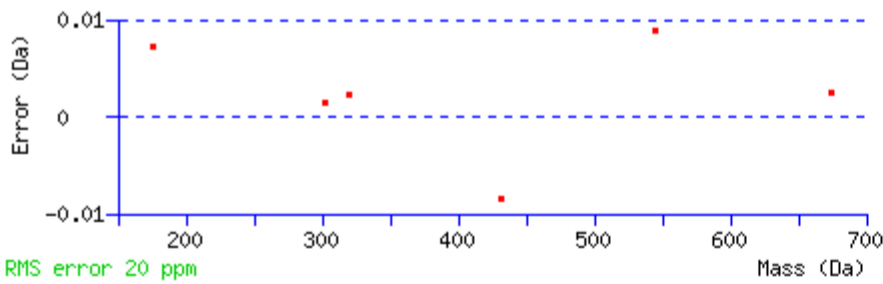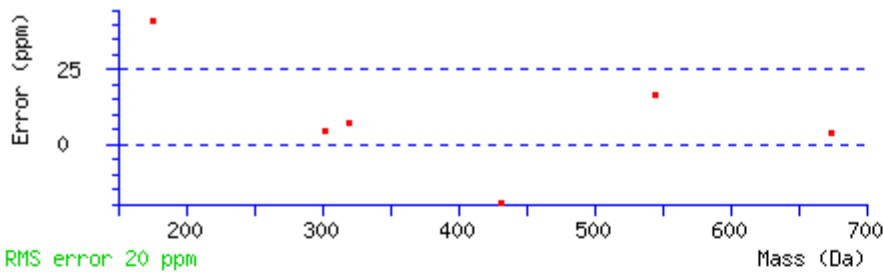

### NCBI BLAST search of **SPEIISGR**

(Parameters: blastp, nr protein database, expect=20000, no filter, PAM30)

Other BLAST [web gateways](#)

### All matches to this query

| Score | $M_r(\text{calc})$ : | Delta     | Sequence                 |
|-------|----------------------|-----------|--------------------------|
| 54.0  | 857.460663           | 0.005745  | <a href="#">SPEIISGR</a> |
| 18.1  | 857.471878           | -0.005470 | <a href="#">NAQLEKR</a>  |
| 16.2  | 857.460648           | 0.005760  | <a href="#">LAEEQLR</a>  |
| 16.2  | 857.460648           | 0.005760  | <a href="#">SPEELKR</a>  |
| 16.2  | 857.460663           | 0.005745  | <a href="#">SPEGLISR</a> |
| 15.9  | 857.460648           | 0.005760  | <a href="#">AEIIQER</a>  |
| 15.9  | 857.460663           | 0.005745  | <a href="#">AELISGPR</a> |
| 15.9  | 857.460648           | 0.005760  | <a href="#">AELLQER</a>  |
| 15.9  | 857.471909           | -0.005501 | <a href="#">SLPPTRR</a>  |
| 15.9  | 857.460663           | 0.005745  | <a href="#">TDPLEKR</a>  |

# MASCOT SEARCH RESULTS

## Peptide View

MS/MS Fragmentation of **EGDLITLLVPEAR**

Found in **BAIP2\_HUMAN**, Brain-specific angiogenesis inhibitor 1-associated protein 2 OS=Homo sapiens GN=BAIAP2 PE=1 SV=1

Match to Query 42348: 1424.790748 from(713.402650,2+) rtinseconds(3896) index(52026)

Title: Locus:1.1.1.2631.9

Data file 2011-11-12 - TFD - EP 6-6.mgf

Click mouse within plot area to zoom in by factor of two about that point

Or, Plot from  to  Da

Label all possible matches  Label matches used for scoring

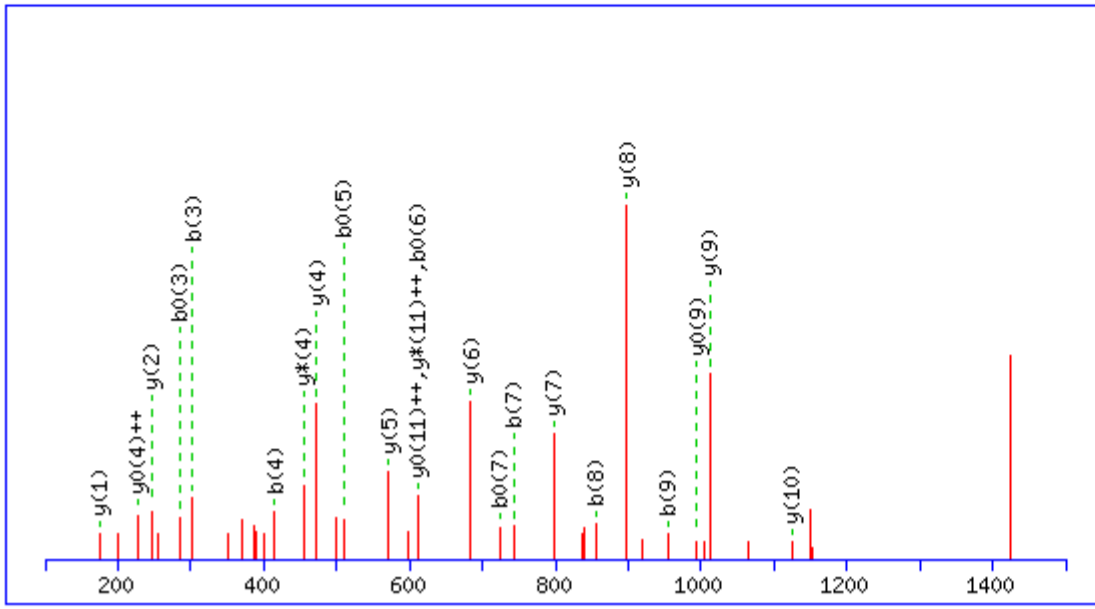

Monoisotopic mass of neutral peptide Mr(calc): 1424.787476

Fixed modifications: Propionamide (C) (apply to specified residues or termini only)

Ions Score: 74 Expect: 2.5e-007

Matches : 23/116 fragment ions using 29 most intense peaks ([help](#))

| #  | b                 | b <sup>++</sup> | b <sup>0</sup>    | b <sup>0++</sup> | Seq. | y                  | y <sup>++</sup> | y <sup>*</sup>    | y <sup>*++</sup>  | y <sup>0</sup>    | y <sup>0++</sup>  | #  |
|----|-------------------|-----------------|-------------------|------------------|------|--------------------|-----------------|-------------------|-------------------|-------------------|-------------------|----|
| 1  | 130.049869        | 65.528572       | 112.039304        | 56.523290        | E    |                    |                 |                   |                   |                   |                   | 13 |
| 2  | 187.071333        | 94.039305       | 169.060768        | 85.034022        | G    | 1296.752179        | 648.879728      | 1279.725630       | 640.366453        | 1278.741614       | 639.874445        | 12 |
| 3  | <b>302.098276</b> | 151.552776      | <b>284.087711</b> | 142.547494       | D    | 1239.730715        | 620.368996      | 1222.704166       | <b>611.855721</b> | 1221.720150       | <b>611.363713</b> | 11 |
| 4  | <b>415.182340</b> | 208.094808      | 397.171775        | 199.089526       | L    | <b>1124.703772</b> | 562.855524      | 1107.677223       | 554.342250        | 1106.693207       | 553.850242        | 10 |
| 5  | 528.266404        | 264.636840      | <b>510.255839</b> | 255.631558       | I    | <b>1011.619708</b> | 506.313492      | 994.593159        | 497.800218        | <b>993.609143</b> | 497.308210        | 9  |
| 6  | 629.314083        | 315.160680      | <b>611.303518</b> | 306.155397       | T    | <b>898.535644</b>  | 449.771460      | 881.509095        | 441.258186        | 880.525079        | 440.766178        | 8  |
| 7  | <b>742.398147</b> | 371.702712      | <b>724.387582</b> | 362.697429       | L    | <b>797.487965</b>  | 399.247621      | 780.461416        | 390.734346        | 779.477400        | 390.242338        | 7  |
| 8  | <b>855.482211</b> | 428.244744      | 837.471646        | 419.239461       | L    | <b>684.403901</b>  | 342.705589      | 667.377352        | 334.192314        | 666.393336        | 333.700306        | 6  |
| 9  | <b>954.550625</b> | 477.778951      | 936.540060        | 468.773668       | V    | <b>571.319837</b>  | 286.163557      | 554.293288        | 277.650282        | 553.309272        | 277.158274        | 5  |
| 10 | 1051.603389       | 526.305333      | 1033.592824       | 517.300050       | P    | <b>472.251423</b>  | 236.629350      | <b>455.224874</b> | 228.116075        | 454.240858        | <b>227.624067</b> | 4  |
| 11 | 1180.645982       | 590.826629      | 1162.635417       | 581.821347       | E    | 375.198659         | 188.102968      | 358.172110        | 179.589693        | 357.188094        | 179.097685        | 3  |
| 12 | 1251.683096       | 626.345186      | 1233.672531       | 617.339904       | A    | <b>246.156066</b>  | 123.581671      | 229.129517        | 115.068396        |                   |                   | 2  |
| 13 |                   |                 |                   |                  | R    | <b>175.118952</b>  | 88.063114       | 158.092403        | 79.549839         |                   |                   | 1  |

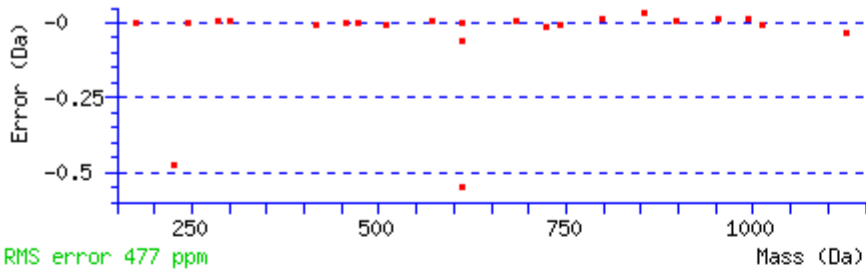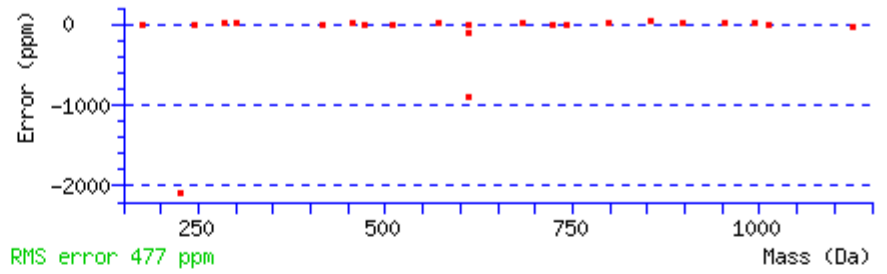

NCBI BLAST search of **EGDLITLLVPEAR**

(Parameters: blastp, nr protein database, expect=20000, no filter, PAM30)

Other BLAST [web gateways](#)

## All matches to this query

| Score | Mr(calc):   | Delta    | Sequence                      |
|-------|-------------|----------|-------------------------------|
| 74.2  | 1424.787476 | 0.003272 | <a href="#">EGDLITLLVPEAR</a> |
| 13.9  | 1424.784973 | 0.005775 | <a href="#">MIGLRLYDGLFK</a>  |

Mascot: <http://www.matrixscience.com/>

# Mascot Search Results

## Peptide View

MS/MS Fragmentation of **LPVDFSNIPTYLLK**

Found in **BRE\_HUMAN**, BRCA1-A complex subunit BRE OS=Homo sapiens GN=BRE PE=1 SV=2

Match to Query 52808: 1618.903928 from(810.459240,2+) rtinseconds(3962) index(59453)

Title: Locus:1.1.1.2887.34

Data file 2011-11-14 - TFD - EP 8-4.mgf

Click mouse within plot area to zoom in by factor of two about that point

Or, Plot from  to  Da

Label all possible matches  Label matches used for scoring

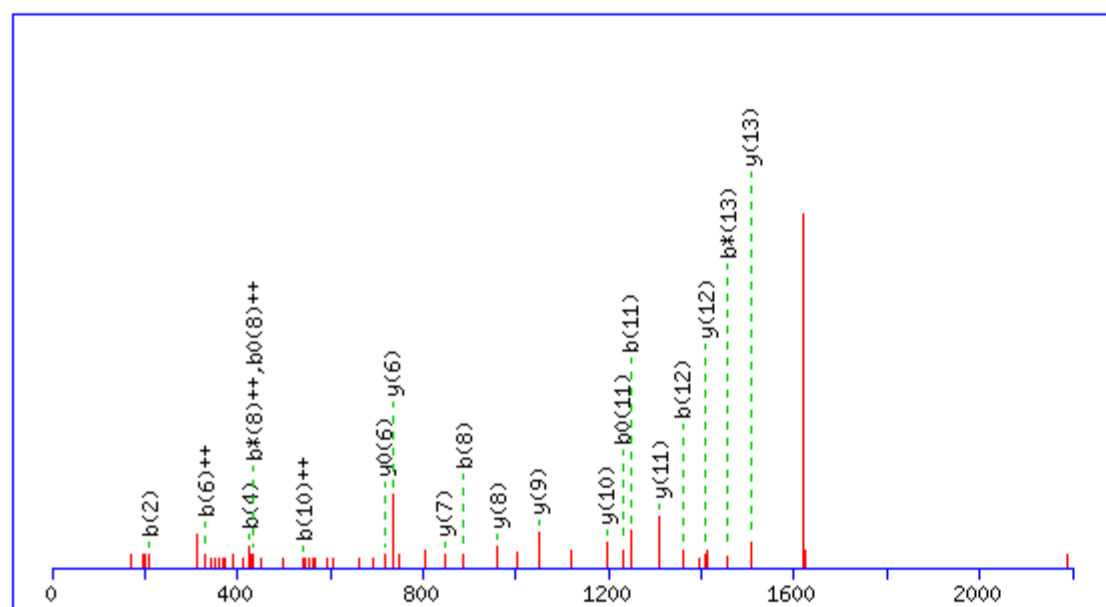

Monoisotopic mass of neutral peptide Mr(calc): 1618.897034

Fixed modifications: Propionamide (C) (apply to specified residues or termini only)

Ions Score: 46 Expect: 0.00011

Matches : 20/130 fragment ions using 34 most intense peaks [\(help\)](#)

| #  | b                  | b <sup>++</sup>   | b <sup>*</sup>     | b <sup>*++</sup>  | b <sup>0</sup>     | b <sup>0++</sup>  | Seq. | y                  | y <sup>++</sup> | y <sup>*</sup> | y <sup>*++</sup> | y <sup>0</sup>    | y <sup>0++</sup> | #  |
|----|--------------------|-------------------|--------------------|-------------------|--------------------|-------------------|------|--------------------|-----------------|----------------|------------------|-------------------|------------------|----|
| 1  | 114.091340         | 57.549308         |                    |                   |                    |                   | L    |                    |                 |                |                  |                   |                  | 14 |
| 2  | <b>211.144104</b>  | 106.075690        |                    |                   |                    |                   | P    | <b>1506.820258</b> | 753.913767      | 1489.793709    | 745.400493       | 1488.809693       | 744.908484       | 13 |
| 3  | 310.212518         | 155.609897        |                    |                   |                    |                   | V    | <b>1409.767494</b> | 705.387385      | 1392.740945    | 696.874111       | 1391.756929       | 696.382102       | 12 |
| 4  | <b>425.239461</b>  | 213.123369        |                    |                   | 407.228896         | 204.118086        | D    | <b>1310.699080</b> | 655.853178      | 1293.672531    | 647.339903       | 1292.688515       | 646.847895       | 11 |
| 5  | 572.307875         | 286.657576        |                    |                   | 554.297310         | 277.652293        | F    | <b>1195.672137</b> | 598.339706      | 1178.645588    | 589.826432       | 1177.661572       | 589.334424       | 10 |
| 6  | 659.339903         | <b>330.173590</b> |                    |                   | 641.329338         | 321.168307        | S    | <b>1048.603723</b> | 524.805500      | 1031.577174    | 516.292225       | 1030.593158       | 515.800217       | 9  |
| 7  | 773.382830         | 387.195053        | 756.356281         | 378.681779        | 755.372265         | 378.189771        | N    | <b>961.571695</b>  | 481.289485      | 944.545146     | 472.776211       | 943.561130        | 472.284203       | 8  |
| 8  | <b>886.466894</b>  | 443.737085        | 869.440345         | <b>435.223811</b> | 868.456329         | <b>434.731803</b> | I    | <b>847.528768</b>  | 424.268022      | 830.502219     | 415.754747       | 829.518203        | 415.262739       | 7  |
| 9  | 983.519658         | 492.263467        | 966.493109         | 483.750193        | 965.509093         | 483.258185        | P    | <b>734.444704</b>  | 367.725990      | 717.418155     | 359.212715       | <b>716.434139</b> | 358.720707       | 6  |
| 10 | 1084.567337        | <b>542.787307</b> | 1067.540788        | 534.274032        | 1066.556772        | 533.782024        | T    | 637.391940         | 319.199608      | 620.365391     | 310.686333       | 619.381375        | 310.194325       | 5  |
| 11 | <b>1247.630666</b> | 624.318971        | 1230.604117        | 615.805697        | <b>1229.620101</b> | 615.313689        | Y    | 536.344261         | 268.675769      | 519.317712     | 260.162494       |                   |                  | 4  |
| 12 | <b>1360.714730</b> | 680.861003        | 1343.688181        | 672.347729        | 1342.704165        | 671.855720        | L    | 373.280932         | 187.144104      | 356.254383     | 178.630829       |                   |                  | 3  |
| 13 | 1473.798794        | 737.403035        | <b>1456.772245</b> | 728.889760        | 1455.788229        | 728.397752        | L    | 260.196868         | 130.602072      | 243.170319     | 122.088797       |                   |                  | 2  |
| 14 |                    |                   |                    |                   |                    |                   | K    | 147.112804         | 74.060040       | 130.086255     | 65.546765        |                   |                  | 1  |

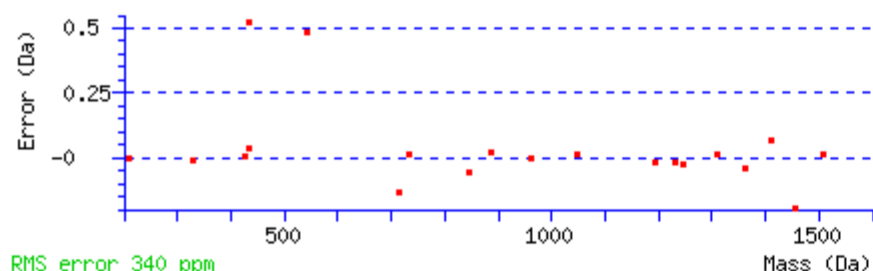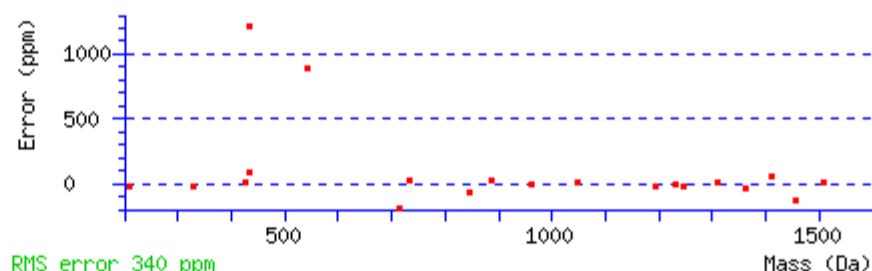

NCBI BLAST search of **LPVDFSNIPTYLLK**

(Parameters: blastp, nr protein database, expect=20000, no filter, PAM30)

Other BLAST [web gateways](#)

All matches to this query

| Score | Mr(calc):   | Delta    | Sequence                       |
|-------|-------------|----------|--------------------------------|
| 46.4  | 1618.897034 | 0.006894 | <a href="#">LPVDFSNIPTYLLK</a> |

Mascot: <http://www.matrixscience.com/>

# MASCOT SCIENCE Mascot Search Results

## Peptide View

MS/MS Fragmentation of **LTLEEAR**

Found in **PGCB\_HUMAN**, Brevican core protein OS=Homo sapiens GN=BCAN PE=1 SV=2

Match to Query 2540: 830.452128 from(416.233340,2+) rtinseconds(1442) index(10722)

Title: Locus:1.1.1.1841.6

Data file 2011-11-12 - TFD - EP 6-5.mgf

Click mouse within plot area to zoom in by factor of two about that point

Or, Plot from  to  Da

Label all possible matches  Label matches used for scoring

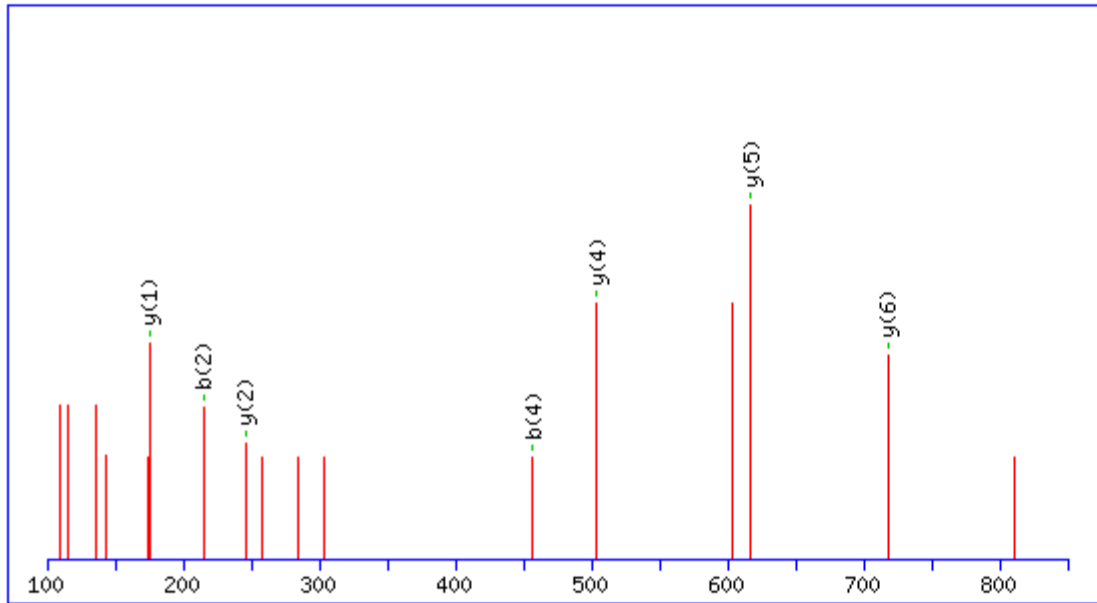

Monoisotopic mass of neutral peptide Mr(calc): 830.449753

Fixed modifications: Propionamide (C) (apply to specified residues or termini only)

Ions Score: 41 Expect: 0.0024

Matches : 7/54 fragment ions using 10 most intense peaks [\(help\)](#)

| # | b                 | b <sup>++</sup> | b <sup>0</sup> | b <sup>0++</sup> | Seq. | y                 | y <sup>++</sup> | y <sup>*</sup> | y <sup>*++</sup> | y <sup>0</sup> | y <sup>0++</sup> | # |
|---|-------------------|-----------------|----------------|------------------|------|-------------------|-----------------|----------------|------------------|----------------|------------------|---|
| 1 | 114.091340        | 57.549308       |                |                  | L    |                   |                 |                |                  |                |                  | 7 |
| 2 | <b>215.139019</b> | 108.073147      | 197.128454     | 99.067865        | T    | <b>718.372995</b> | 359.690136      | 701.346446     | 351.176861       | 700.362430     | 350.684853       | 6 |
| 3 | 328.223083        | 164.615179      | 310.212518     | 155.609897       | L    | <b>617.325316</b> | 309.166296      | 600.298767     | 300.653022       | 599.314751     | 300.161014       | 5 |
| 4 | <b>457.265676</b> | 229.136476      | 439.255111     | 220.131193       | E    | <b>504.241252</b> | 252.624264      | 487.214703     | 244.110989       | 486.230687     | 243.618981       | 4 |
| 5 | 586.308269        | 293.657773      | 568.297704     | 284.652490       | E    | 375.198659        | 188.102967      | 358.172110     | 179.589693       | 357.188094     | 179.097685       | 3 |
| 6 | 657.345383        | 329.176330      | 639.334818     | 320.171047       | A    | <b>246.156066</b> | 123.581671      | 229.129517     | 115.068396       |                |                  | 2 |
| 7 |                   |                 |                |                  | R    | <b>175.118952</b> | 88.063114       | 158.092403     | 79.549839        |                |                  | 1 |

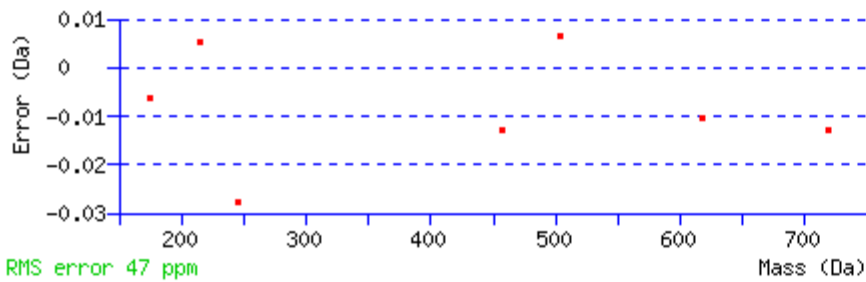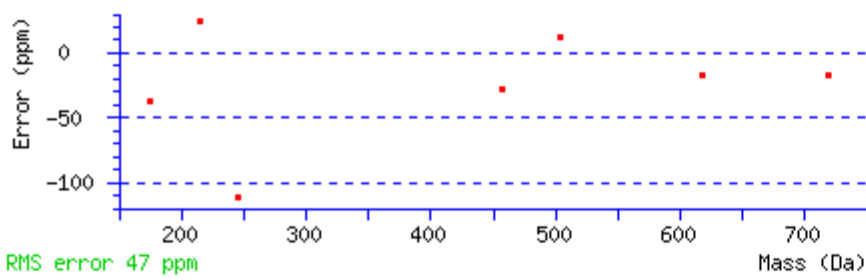

NCBI BLAST search of **LTLEEAR**

(Parameters: blastp, nr protein database, expect=20000, no filter, PAM30)

Other BLAST [web gateways](#)

## All matches to this query

| Score | Mr(calc):  | Delta     | Sequence                 |
|-------|------------|-----------|--------------------------|
| 41.1  | 830.449753 | 0.002375  | <a href="#">LTLEEAR</a>  |
| 27.4  | 830.449753 | 0.002375  | <a href="#">LTIAEER</a>  |
| 15.7  | 830.449768 | 0.002360  | <a href="#">TLPEISR</a>  |
| 15.6  | 830.449753 | 0.002375  | <a href="#">LTALEER</a>  |
| 9.5   | 830.449753 | 0.002375  | <a href="#">TIEELAR</a>  |
| 7.5   | 830.454453 | -0.002325 | <a href="#">ICRAAAR</a>  |
| 5.8   | 830.449768 | 0.002360  | <a href="#">DVENKVK</a>  |
| 5.1   | 830.449768 | 0.002360  | <a href="#">LLSPTER</a>  |
| 1.1   | 830.449753 | 0.002375  | <a href="#">TLEEAIR</a>  |
| 1.0   | 830.449768 | 0.002360  | <a href="#">ITADGNLK</a> |

# MASCOT Search Results

## Peptide View

MS/MS Fragmentation of **LSSGLTGRR**

Found in **BAHDI\_HUMAN**, Bromo adjacent homology domain-containing 1 protein OS=Homo sapiens GN=BAHD1 PE=1 SV=2

Match to Query 189107: 945.526388 from(473.770470,2+) rtinseconds(1467) index(419655)

Title: Locus:1.1.1.898.14

Data file C:\Program Files (x86)\Matrix Science\Mascot Daemon\mgf3 TFD - Epitel - R2\mascot\_daemon\_merge.mgf

Click mouse within plot area to zoom in by factor of two about that point

Or, Plot from  to  Da

Label all possible matches  Label matches used for scoring

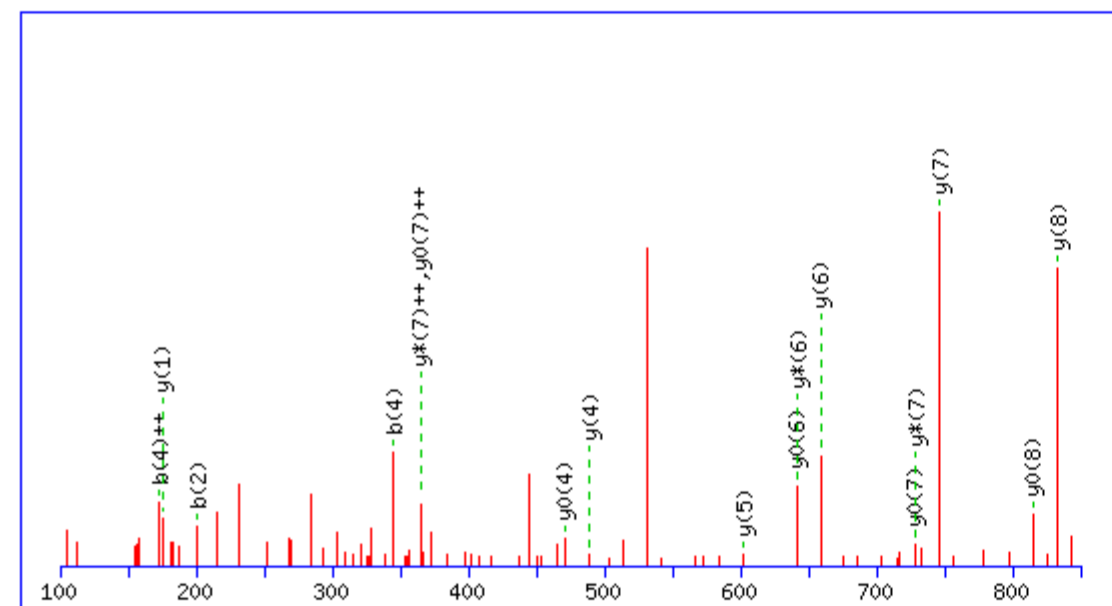

Monoisotopic mass of neutral peptide Mr(calc): 945.535568

Fixed modifications: Carbamidomethyl (C) (apply to specified residues or termini only)

Ions Score: 34 Expect: 0.0047

Matches : 17/74 fragment ions using 32 most intense peaks [\(help\)](#)

| # | b                 | b <sup>++</sup>   | b <sup>*</sup> | b <sup>*++</sup> | b <sup>0</sup> | b <sup>0++</sup> | Seq. | y                 | y <sup>++</sup> | y <sup>*</sup>    | y <sup>*++</sup>  | y <sup>0</sup>    | y <sup>0++</sup>  | # |
|---|-------------------|-------------------|----------------|------------------|----------------|------------------|------|-------------------|-----------------|-------------------|-------------------|-------------------|-------------------|---|
| 1 | 114.091340        | 57.549308         |                |                  |                |                  | L    |                   |                 |                   |                   |                   |                   | 9 |
| 2 | <b>201.123368</b> | 101.065322        |                |                  | 183.112803     | 92.060039        | S    | <b>833.458790</b> | 417.233033      | 816.432241        | 408.719759        | <b>815.448225</b> | 408.227751        | 8 |
| 3 | 288.155396        | 144.581336        |                |                  | 270.144831     | 135.576053       | S    | <b>746.426762</b> | 373.717019      | <b>729.400213</b> | <b>365.203745</b> | <b>728.416197</b> | <b>364.711737</b> | 7 |
| 4 | <b>345.176860</b> | <b>173.092068</b> |                |                  | 327.166295     | 164.086785       | G    | <b>659.394734</b> | 330.201005      | <b>642.368185</b> | 321.687731        | <b>641.384169</b> | 321.195723        | 6 |
| 5 | 458.260924        | 229.634100        |                |                  | 440.250359     | 220.628817       | L    | <b>602.373270</b> | 301.690273      | 585.346721        | 293.176999        | 584.362705        | 292.684991        | 5 |
| 6 | 559.308603        | 280.157940        |                |                  | 541.298038     | 271.152657       | T    | <b>489.289206</b> | 245.148241      | 472.262657        | 236.634966        | <b>471.278641</b> | 236.142958        | 4 |
| 7 | 616.330067        | 308.668672        |                |                  | 598.319502     | 299.663389       | G    | 388.241527        | 194.624402      | 371.214978        | 186.111127        |                   |                   | 3 |
| 8 | 772.431178        | 386.719227        | 755.404629     | 378.205953       | 754.420613     | 377.713945       | R    | 331.220063        | 166.113669      | 314.193514        | 157.600395        |                   |                   | 2 |
| 9 |                   |                   |                |                  |                |                  | R    | <b>175.118952</b> | 88.063114       | 158.092403        | 79.549839         |                   |                   | 1 |

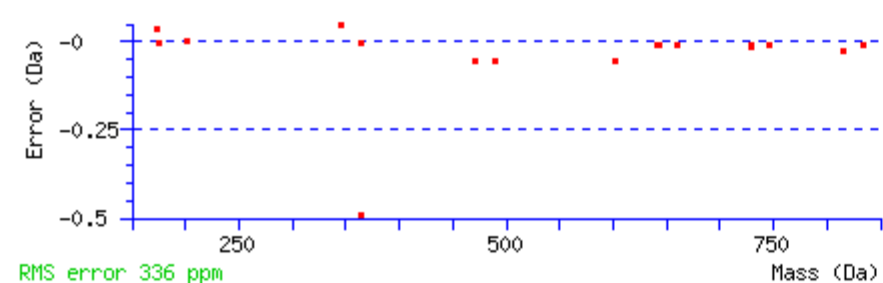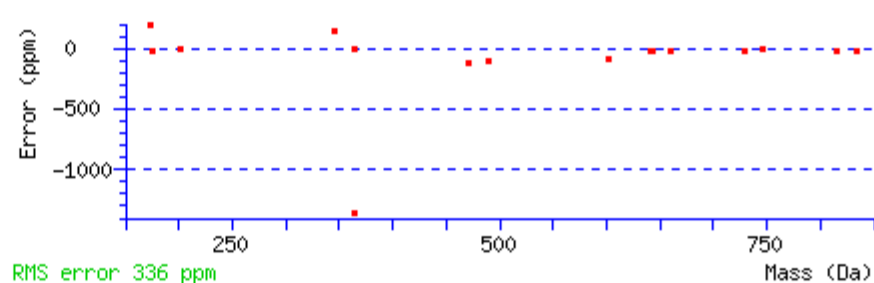

NCBI BLAST search of [LSSGLTGRR](#)

(Parameters: blastp, nr protein database, expect=20000, no filter, PAM30)

Other BLAST [web gateways](#)

## All matches to this query

| Score | Mr(calc):  | Delta     | Sequence                  |
|-------|------------|-----------|---------------------------|
| 33.9  | 945.535568 | -0.009180 | <a href="#">LSSGLTGRR</a> |
| 21.6  | 945.524323 | 0.002065  | <a href="#">EQSVSKIR</a>  |
| 20.1  | 945.524323 | 0.002065  | <a href="#">ISQSTALAR</a> |
| 17.3  | 945.524338 | 0.002050  | <a href="#">ISAQILTGR</a> |
| 11.0  | 945.524323 | 0.002065  | <a href="#">SEQSVKLR</a>  |
| 9.7   | 945.521820 | 0.004568  | <a href="#">CALWIRK</a>   |
| 9.1   | 945.528366 | -0.001978 | <a href="#">LSFLTPR</a>   |
| 8.6   | 945.517807 | 0.008581  | <a href="#">ICTRKPR</a>   |
| 8.3   | 945.528366 | -0.001978 | <a href="#">LSFLTPR</a>   |
| 7.7   | 945.524307 | 0.002081  | <a href="#">ESKLNSIR</a>  |

Mascot: <http://www.matrixscience.com/>

**Peptide View**

MS/MS Fragmentation of **HLKSPVR**

Found in **BAZ2A\_HUMAN**, Bromodomain adjacent to zinc finger domain protein 2A OS=Homo sapiens GN=BAZ2A PE=1 SV=4

Match to Query 3274: 835.505208 from(418.759880,2+) rtinseconds(1402) index(6070)

Title: Locus:1.1.1.1940.6

Data file 2011-11-10 - TFD - EP 3-7.mgf

Click mouse within plot area to zoom in by factor of two about that point

Or, Plot from  to  Da

Label all possible matches  Label matches used for scoring

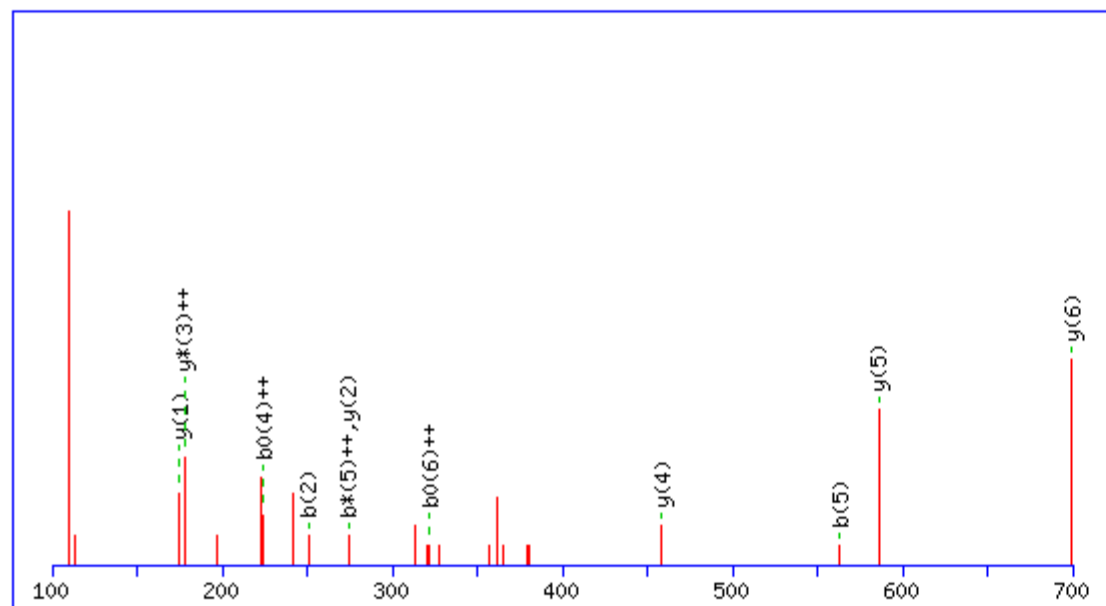

Monoisotopic mass of neutral peptide Mr(calc): 835.502808

Fixed modifications: Propionamide (C) (apply to specified residues or termini only)

Ions Score: 31 Expect: 0.00095

Matches : 11/56 fragment ions using 19 most intense peaks [\(help\)](#)

| # | b                 | b <sup>++</sup> | b <sup>+</sup> | b <sup>*++</sup>  | b <sup>0</sup> | b <sup>0++</sup>  | Seq. | y                 | y <sup>++</sup> | y <sup>+</sup> | y <sup>*++</sup>  | y <sup>0</sup> | y <sup>0++</sup> | # |
|---|-------------------|-----------------|----------------|-------------------|----------------|-------------------|------|-------------------|-----------------|----------------|-------------------|----------------|------------------|---|
| 1 | 138.066188        | 69.536732       |                |                   |                |                   | H    |                   |                 |                |                   |                |                  | 7 |
| 2 | <b>251.150252</b> | 126.078764      |                |                   |                |                   | L    | <b>699.451185</b> | 350.229231      | 682.424636     | 341.715956        | 681.440620     | 341.223948       | 6 |
| 3 | 379.245215        | 190.126245      | 362.218666     | 181.612971        |                |                   | K    | <b>586.367121</b> | 293.687199      | 569.340572     | 285.173924        | 568.356556     | 284.681916       | 5 |
| 4 | 466.277243        | 233.642259      | 449.250694     | 225.128985        | 448.266678     | <b>224.636977</b> | S    | <b>458.272158</b> | 229.639717      | 441.245609     | 221.126443        | 440.261593     | 220.634435       | 4 |
| 5 | <b>563.330007</b> | 282.168642      | 546.303458     | <b>273.655367</b> | 545.319442     | 273.163359        | P    | 371.240130        | 186.123703      | 354.213581     | <b>177.610429</b> |                |                  | 3 |
| 6 | 662.398421        | 331.702849      | 645.371872     | 323.189574        | 644.387856     | <b>322.697566</b> | V    | <b>274.187366</b> | 137.597321      | 257.160817     | 129.084047        |                |                  | 2 |
| 7 |                   |                 |                |                   |                |                   | R    | <b>175.118952</b> | 88.063114       | 158.092403     | 79.549840         |                |                  | 1 |

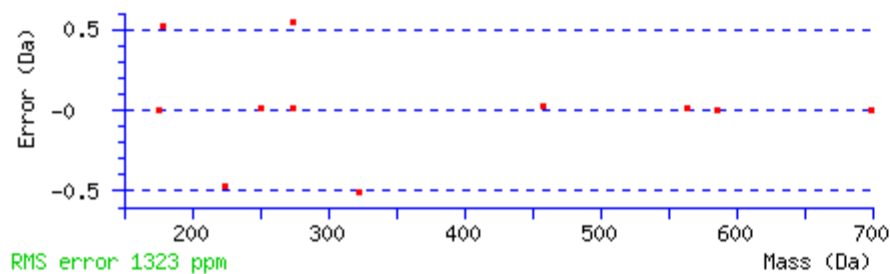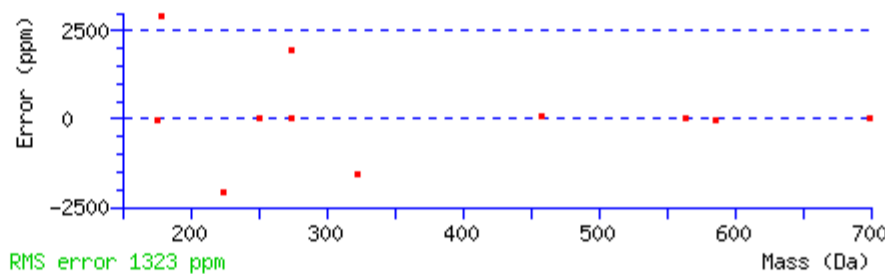

NCBI BLAST search of [HLKSPVR](#)

(Parameters: blastp, nr protein database, expect=20000, no filter, PAM30)

Other BLAST [web gateways](#)

**All matches to this query**

| Score | Mr(calc):  | Delta    | Sequence                |
|-------|------------|----------|-------------------------|
| 30.8  | 835.502808 | 0.002400 | <a href="#">HLKSPVR</a> |
| 28.8  | 835.502808 | 0.002400 | <a href="#">HIKPVSR</a> |
| 26.1  | 835.502808 | 0.002400 | <a href="#">HLQLAVR</a> |
| 6.6   | 835.502808 | 0.002400 | <a href="#">HLPKLGR</a> |

# MASCOT Search Results

## Peptide View

MS/MS Fragmentation of **GWYPKPLTVWR**

Found in **BT2A1\_HUMAN**, Butyrophilin subfamily 2 member A1 OS=Homo sapiens GN=BTN2A1 PE=1 SV=3

Match to Query 41830: 1417.763288 from(709.888920,2+) rtinseconds(3574) index(50480)

Title: Locus:1.1.1.2807.22

Data file 2011-11-14 - TFD - EP 7-2.mgf

Click mouse within plot area to zoom in by factor of two about that point

Or, Plot from  to  Da

Label all possible matches  Label matches used for scoring

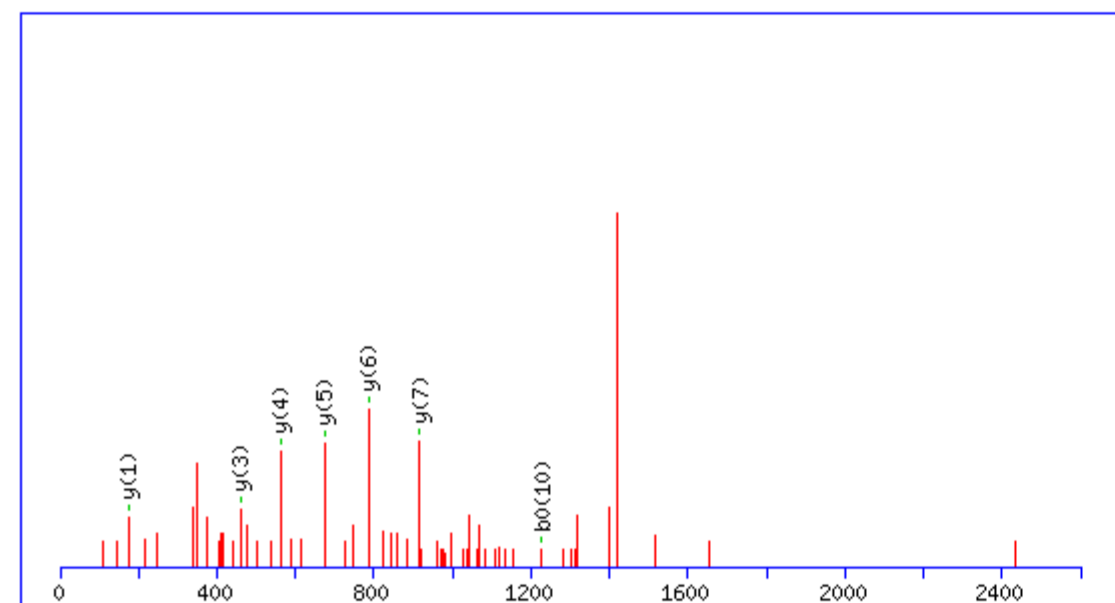

Monoisotopic mass of neutral peptide Mr(calc): 1417.750656

Fixed modifications: Propionamide (C) (apply to specified residues or termini only)

Variable modifications:

P6 : Oxidation (P)

Ions Score: 36 Expect: 0.0019

Matches : 7/92 fragment ions using 13 most intense peaks [\(help\)](#)

| #  | b           | b <sup>++</sup> | b*          | b <sup>*++</sup> | b <sup>0</sup>     | b <sup>0++</sup> | Seq. | y                 | y <sup>++</sup> | y*          | y <sup>*++</sup> | y <sup>0</sup> | y <sup>0++</sup> | #  |
|----|-------------|-----------------|-------------|------------------|--------------------|------------------|------|-------------------|-----------------|-------------|------------------|----------------|------------------|----|
| 1  | 58.028740   | 29.518008       |             |                  |                    |                  | G    |                   |                 |             |                  |                |                  | 11 |
| 2  | 244.108053  | 122.557665      |             |                  |                    |                  | W    | 1361.736470       | 681.371873      | 1344.709921 | 672.858599       | 1343.725905    | 672.366591       | 10 |
| 3  | 407.171382  | 204.089329      |             |                  |                    |                  | Y    | 1175.657157       | 588.332217      | 1158.630608 | 579.818942       | 1157.646592    | 579.326934       | 9  |
| 4  | 504.224146  | 252.615711      |             |                  |                    |                  | P    | 1012.593828       | 506.800552      | 995.567279  | 498.287278       | 994.583263     | 497.795270       | 8  |
| 5  | 632.319109  | 316.663193      | 615.292560  | 308.149918       |                    |                  | K    | <b>915.541064</b> | 458.274170      | 898.514515  | 449.760896       | 897.530499     | 449.268888       | 7  |
| 6  | 745.366788  | 373.187032      | 728.340239  | 364.673758       |                    |                  | P    | <b>787.446101</b> | 394.226689      | 770.419552  | 385.713414       | 769.435536     | 385.221406       | 6  |
| 7  | 858.450852  | 429.729064      | 841.424303  | 421.215790       |                    |                  | L    | <b>674.398422</b> | 337.702849      | 657.371873  | 329.189575       | 656.387857     | 328.697567       | 5  |
| 8  | 959.498531  | 480.252904      | 942.471982  | 471.739629       | 941.487966         | 471.247621       | T    | <b>561.314358</b> | 281.160817      | 544.287809  | 272.647543       | 543.303793     | 272.155535       | 4  |
| 9  | 1058.566945 | 529.787111      | 1041.540396 | 521.273836       | 1040.556380        | 520.781828       | V    | <b>460.266679</b> | 230.636977      | 443.240130  | 222.123703       |                |                  | 3  |
| 10 | 1244.646258 | 622.826767      | 1227.619709 | 614.313493       | <b>1226.635693</b> | 613.821485       | W    | 361.198265        | 181.102770      | 344.171716  | 172.589496       |                |                  | 2  |
| 11 |             |                 |             |                  |                    |                  | R    | <b>175.118952</b> | 88.063114       | 158.092403  | 79.549839        |                |                  | 1  |

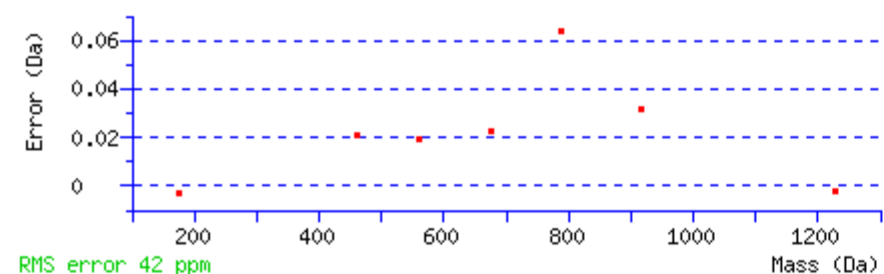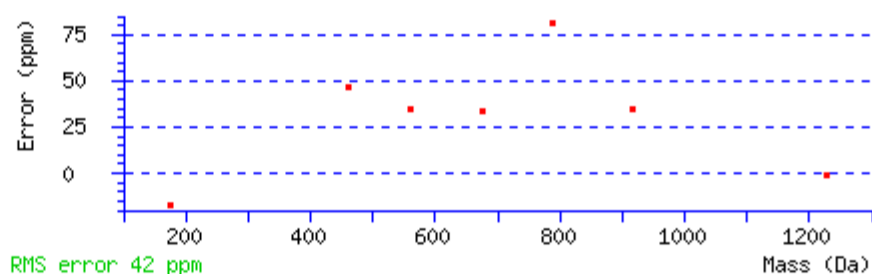

NCBI BLAST search of **GWYPKPLTVWR**

(Parameters: blastp, nr protein database, expect=20000, no filter, PAM30)

Other BLAST [web gateways](#)

## All matches to this query

| Score | Mr(calc):   | Delta     | Sequence                        |
|-------|-------------|-----------|---------------------------------|
| 35.9  | 1417.750656 | 0.012632  | <a href="#">GWYPKPLTVWR</a>     |
| 12.4  | 1417.750656 | 0.012632  | <a href="#">GWYPKPLTVWR</a>     |
| 4.7   | 1417.761215 | 0.002073  | <a href="#">SLRLCPPHPTAR</a>    |
| 4.7   | 1417.759872 | 0.003416  | <a href="#">MAELQVRDLSLK</a>    |
| 3.7   | 1417.767746 | -0.004458 | <a href="#">LYQRPGGTAKAK</a>    |
| 1.3   | 1417.767792 | -0.004504 | <a href="#">VAGATVGGPVPAPGR</a> |
| 1.2   | 1417.756531 | 0.006757  | <a href="#">WSETQNVVTKVK</a>    |
| 0.1   | 1417.756516 | 0.006772  | <a href="#">LVKYLDPNLGR</a>     |
| 0.1   | 1417.756531 | 0.006757  | <a href="#">LPQKFDILVGER</a>    |



# MASCOT SCIENCE Mascot Search Results

## Peptide View

MS/MS Fragmentation of **ALFKPADVILDPK**

Found in **BT3A1\_HUMAN**, Butyrophilin subfamily 3 member A1 OS=Homo sapiens GN=BTN3A1 PE=2 SV=3

Match to Query 787091: 1441.819388 from(721.916970,2+) rtinseconds(2095) index(838085)

Title: Locus:1.1.1.1344.48

Data file C:\Program Files (x86)\Matrix Science\Mascot Daemon\mgf3 TFD - Epitel - R2\mascot\_daemon\_merge.mgf

Click mouse within plot area to zoom in by factor of two about that point

Or, Plot from  to  Da

Label all possible matches  Label matches used for scoring

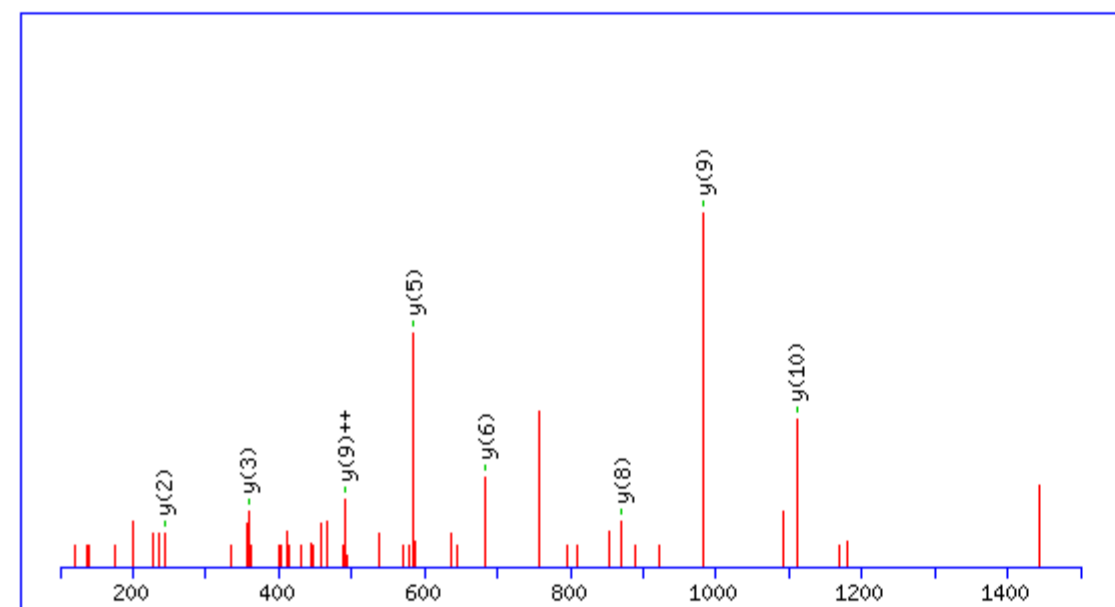

Monoisotopic mass of neutral peptide Mr(calc): 1441.818054

Fixed modifications: Carbamidomethyl (C) (apply to specified residues or termini only)

Variable modifications:

P5 : Oxidation (P)

Ions Score: 53 Expect: 2.7e-005

Matches : 8/122 fragment ions using 11 most intense peaks [\(help\)](#)

| #  | b           | b <sup>++</sup> | b*          | b <sup>+++</sup> | b <sup>0</sup> | b <sup>0++</sup> | Seq. | y                  | y <sup>++</sup>   | y*          | y <sup>+++</sup> | y <sup>0</sup> | y <sup>0++</sup> | #  |
|----|-------------|-----------------|-------------|------------------|----------------|------------------|------|--------------------|-------------------|-------------|------------------|----------------|------------------|----|
| 1  | 72.044390   | 36.525833       |             |                  |                |                  | A    |                    |                   |             |                  |                |                  | 13 |
| 2  | 185.128454  | 93.067865       |             |                  |                |                  | L    | 1371.788230        | 686.397753        | 1354.761681 | 677.884479       | 1353.777665    | 677.392471       | 12 |
| 3  | 332.196868  | 166.602072      |             |                  |                |                  | F    | 1258.704166        | 629.855721        | 1241.677617 | 621.342447       | 1240.693601    | 620.850439       | 11 |
| 4  | 460.291831  | 230.649553      | 443.265282  | 222.136279       |                |                  | K    | <b>1111.635752</b> | 556.321514        | 1094.609203 | 547.808240       | 1093.625187    | 547.316232       | 10 |
| 5  | 573.339510  | 287.173393      | 556.312961  | 278.660119       |                |                  | P    | <b>983.540789</b>  | <b>492.274033</b> | 966.514240  | 483.760758       | 965.530224     | 483.268750       | 9  |
| 6  | 644.376624  | 322.691950      | 627.350075  | 314.178676       |                |                  | A    | <b>870.493110</b>  | 435.750193        | 853.466561  | 427.236919       | 852.482545     | 426.744911       | 8  |
| 7  | 759.403567  | 380.205422      | 742.377018  | 371.692147       | 741.393002     | 371.200139       | D    | 799.455996         | 400.231636        | 782.429447  | 391.718362       | 781.445431     | 391.226354       | 7  |
| 8  | 858.471981  | 429.739628      | 841.445432  | 421.226354       | 840.461416     | 420.734346       | V    | <b>684.429053</b>  | 342.718165        | 667.402504  | 334.204890       | 666.418488     | 333.712882       | 6  |
| 9  | 971.556045  | 486.281660      | 954.529496  | 477.768386       | 953.545480     | 477.276378       | I    | <b>585.360639</b>  | 293.183958        | 568.334090  | 284.670683       | 567.350074     | 284.178675       | 5  |
| 10 | 1084.640109 | 542.823692      | 1067.613560 | 534.310418       | 1066.629544    | 533.818410       | L    | 472.276575         | 236.641926        | 455.250026  | 228.128651       | 454.266010     | 227.636643       | 4  |
| 11 | 1199.667052 | 600.337164      | 1182.640503 | 591.823890       | 1181.656487    | 591.331882       | D    | <b>359.192511</b>  | 180.099894        | 342.165962  | 171.586619       | 341.181946     | 171.094611       | 3  |
| 12 | 1296.719816 | 648.863546      | 1279.693267 | 640.350272       | 1278.709251    | 639.858264       | P    | <b>244.165568</b>  | 122.586422        | 227.139019  | 114.073148       |                |                  | 2  |
| 13 |             |                 |             |                  |                |                  | K    | 147.112804         | 74.060040         | 130.086255  | 65.546765        |                |                  | 1  |

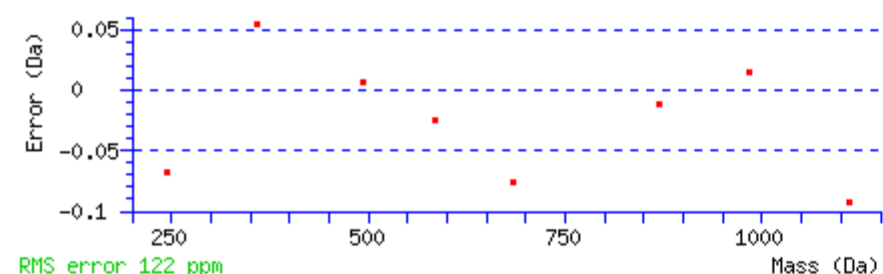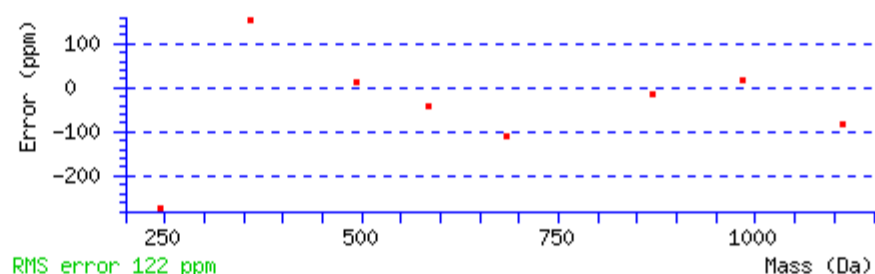

NCBI BLAST search of [ALFKPADVILDPK](#)

(Parameters: blastp, nr protein database, expect=20000, no filter, PAM30)

Other BLAST [web gateways](#)

## All matches to this query

| Score | Mr(calc):   | Delta     | Sequence                      |
|-------|-------------|-----------|-------------------------------|
| 53.0  | 1441.818054 | 0.001334  | <a href="#">ALFKPADVILDPK</a> |
| 10.8  | 1441.829285 | -0.009897 | <a href="#">PKPGVFDLINKAK</a> |
| 10.8  | 1441.829285 | -0.009897 | <a href="#">PKPGVFDLINKAK</a> |
| 8.1   | 1441.829285 | -0.009897 | <a href="#">NKHEFTILVTLK</a>  |
| 4.9   | 1441.818054 | 0.001334  | <a href="#">ALFKPADVILDPK</a> |
| 1.5   | 1441.819397 | -0.000009 | <a href="#">RLPTFWPSGLLR</a>  |
| 0.1   | 1441.813995 | 0.005393  | <a href="#">LKETLAQAQAEK</a>  |

Mascot: <http://www.matrixscience.com/>

# **MATRIX** SCIENCE Mascot Search Results

## Peptide View

MS/MS Fragmentation of **TIRIEWLK**

Found in **CDHR1\_HUMAN**, Cadherin-related family member 1 OS=Homo sapiens GN=CDHR1 PE=1 SV=2

Match to Query 340333: 1057.636928 from(529.825740,2+) rtinseconds(1701) index(506215)

Title: Locus:1.1.1.978.28

Data file C:\Program Files (x86)\Matrix Science\Mascot Daemon\mgf\3 TFD - Epitel - R2\mascot\_daemon\_merge.mgf

Click mouse within plot area to zoom in by factor of two about that point

Or, Plot from  to  Da

Label all possible matches  Label matches used for scoring

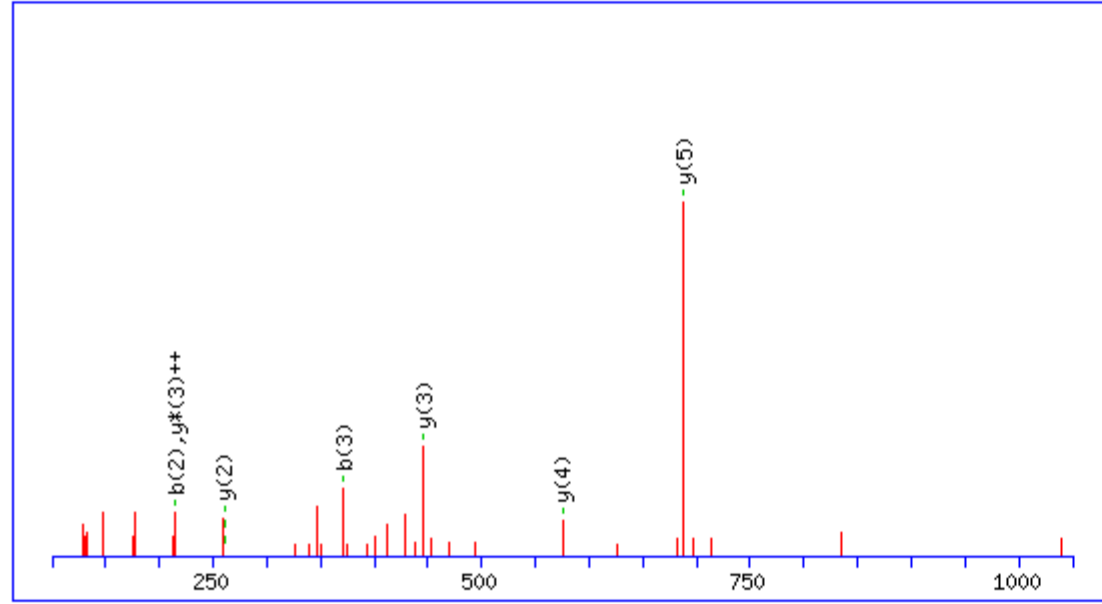

Monoisotopic mass of neutral peptide Mr(calc): 1057.628387

Fixed modifications: Carbamidomethyl (C) (apply to specified residues or termini only)

Ions Score: 34 Expect: 0.0012

Matches : 7/74 fragment ions using 8 most intense peaks [\(help\)](#)

| # | b                 | b <sup>++</sup> | b <sup>*</sup> | b <sup>*++</sup> | b <sup>0</sup> | b <sup>0++</sup> | Seq. | y                 | y <sup>++</sup> | y <sup>*</sup> | y <sup>*++</sup>  | y <sup>0</sup> | y <sup>0++</sup> | # |
|---|-------------------|-----------------|----------------|------------------|----------------|------------------|------|-------------------|-----------------|----------------|-------------------|----------------|------------------|---|
| 1 | 102.054955        | 51.531116       |                |                  | 84.044390      | 42.525833        | T    |                   |                 |                |                   |                |                  | 8 |
| 2 | <b>215.139019</b> | 108.073147      |                |                  | 197.128454     | 99.067865        | I    | 957.588013        | 479.297645      | 940.561464     | 470.784370        | 939.577448     | 470.292362       | 7 |
| 3 | <b>371.240130</b> | 186.123703      | 354.213581     | 177.610428       | 353.229565     | 177.118420       | R    | 844.503949        | 422.755613      | 827.477400     | 414.242338        | 826.493384     | 413.750330       | 6 |
| 4 | 484.324194        | 242.665735      | 467.297645     | 234.152460       | 466.313629     | 233.660452       | I    | <b>688.402838</b> | 344.705057      | 671.376289     | 336.191783        | 670.392273     | 335.699775       | 5 |
| 5 | 613.366787        | 307.187032      | 596.340238     | 298.673757       | 595.356222     | 298.181749       | E    | <b>575.318774</b> | 288.163025      | 558.292225     | 279.649751        | 557.308209     | 279.157743       | 4 |
| 6 | 799.446100        | 400.226688      | 782.419551     | 391.713414       | 781.435535     | 391.221406       | W    | <b>446.276181</b> | 223.641728      | 429.249632     | <b>215.128454</b> |                |                  | 3 |
| 7 | 912.530164        | 456.768720      | 895.503615     | 448.255446       | 894.519599     | 447.763438       | L    | <b>260.196868</b> | 130.602072      | 243.170319     | 122.088797        |                |                  | 2 |
| 8 |                   |                 |                |                  |                |                  | K    | 147.112804        | 74.060040       | 130.086255     | 65.546765         |                |                  | 1 |

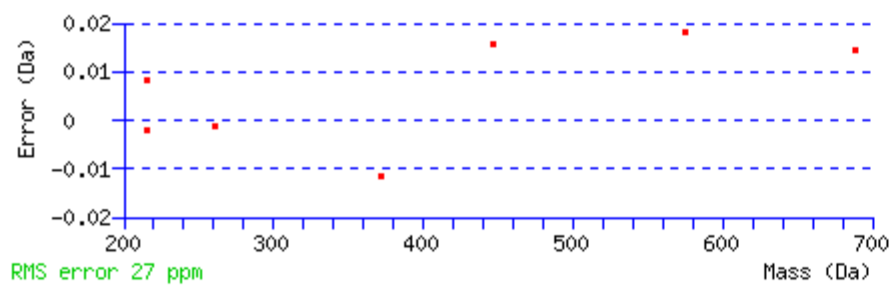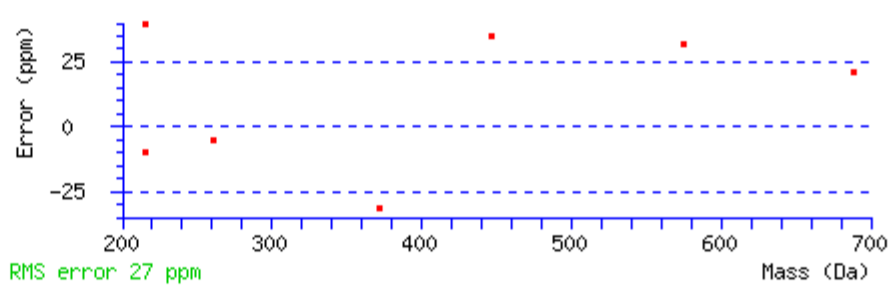

NCBI BLAST search of **TIRIEWLK**

(Parameters: blastp, nr protein database, expect=20000, no filter, PAM30)

Other BLAST [web gateways](#)

## All matches to this query

| Score | Mr(calc):   | Delta     | Sequence                  |
|-------|-------------|-----------|---------------------------|
| 33.7  | 1057.628387 | 0.008541  | <a href="#">TIRIEWLK</a>  |
| 7.0   | 1057.638290 | -0.001362 | <a href="#">EKITPLTLK</a> |
| 2.8   | 1057.628418 | 0.008510  | <a href="#">VKSFLPVPR</a> |
| 2.0   | 1057.638275 | -0.001347 | <a href="#">LVKEIESLK</a> |
| 0.8   | 1057.638275 | -0.001347 | <a href="#">LKEVISLEK</a> |

# MASCOT Search Results

## Peptide View

MS/MS Fragmentation of **VTPPPPVFSLLK**

Found in **CLCA4\_HUMAN**, Calcium-activated chloride channel regulator 4 OS=Homo sapiens GN=CLCA4 PE=1 SV=2

Match to Query 38141: 1390.809988 from(696.412270,2+) rtinseconds(3439) index(49639)

Title: Locus:1.1.1.1748.19

Data file 2012-01-27 - TFD - Epitel - IEC - 10ul - 3.mgf

Click mouse within plot area to zoom in by factor of two about that point

Or, Plot from  to  Da

Label all possible matches  Label matches used for scoring

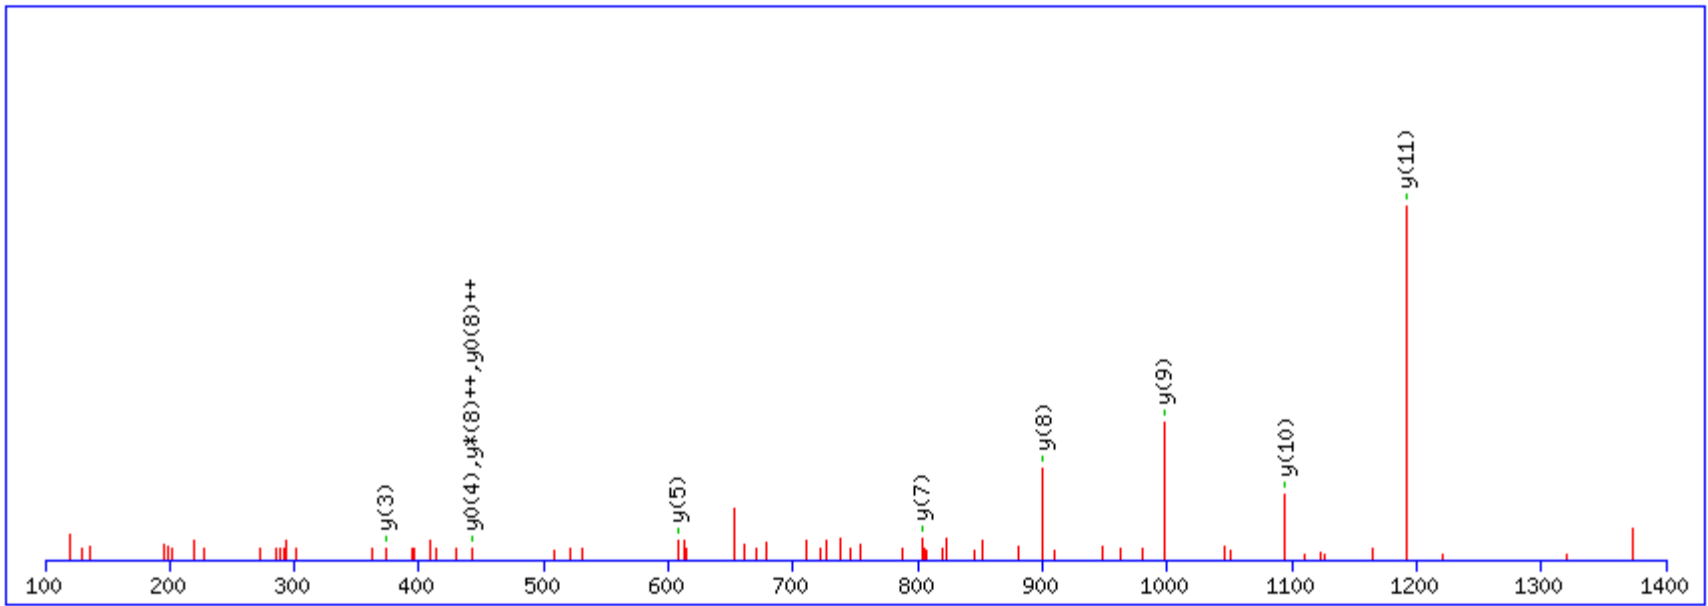

Monoisotopic mass of neutral peptide  $M_r(\text{calc})$ : 1390.822433

Fixed modifications: Carbamidomethyl (C) (apply to specified residues or termini only)

Ions Score: 33 Expect: 0.0014

Matches : 10/112 fragment ions using 25 most intense peaks [\(help\)](#)

| #  | b           | b <sup>++</sup> | b <sup>0</sup> | b <sup>0++</sup> | Seq. | y                  | y <sup>++</sup> | y <sup>*</sup> | y <sup>*++</sup>  | y <sup>0</sup>    | y <sup>0++</sup>  | #  |
|----|-------------|-----------------|----------------|------------------|------|--------------------|-----------------|----------------|-------------------|-------------------|-------------------|----|
| 1  | 100.075690  | 50.541483       |                |                  | V    |                    |                 |                |                   |                   |                   | 13 |
| 2  | 201.123369  | 101.065322      | 183.112804     | 92.060040        | T    | 1292.761287        | 646.884281      | 1275.734738    | 638.371007        | 1274.750722       | 637.878999        | 12 |
| 3  | 298.176133  | 149.591704      | 280.165568     | 140.586422       | P    | <b>1191.713608</b> | 596.360442      | 1174.687059    | 587.847167        | 1173.703043       | 587.355159        | 11 |
| 4  | 395.228897  | 198.118087      | 377.218332     | 189.112804       | P    | <b>1094.660844</b> | 547.834060      | 1077.634295    | 539.320785        | 1076.650279       | 538.828777        | 10 |
| 5  | 492.281661  | 246.644469      | 474.271096     | 237.639186       | P    | <b>997.608080</b>  | 499.307678      | 980.581531     | 490.794403        | 979.597515        | 490.302395        | 9  |
| 6  | 589.334425  | 295.170851      | 571.323860     | 286.165568       | P    | <b>900.555316</b>  | 450.781296      | 883.528767     | <b>442.268021</b> | 882.544751        | <b>441.776013</b> | 8  |
| 7  | 686.387189  | 343.697233      | 668.376624     | 334.691950       | P    | <b>803.502552</b>  | 402.254914      | 786.476003     | 393.741639        | 785.491987        | 393.249631        | 7  |
| 8  | 785.455603  | 393.231440      | 767.445038     | 384.226157       | V    | 706.449788         | 353.728532      | 689.423239     | 345.215257        | 688.439223        | 344.723249        | 6  |
| 9  | 932.524017  | 466.765647      | 914.513452     | 457.760364       | F    | <b>607.381374</b>  | 304.194325      | 590.354825     | 295.681050        | 589.370809        | 295.189042        | 5  |
| 10 | 1019.556045 | 510.281661      | 1001.545480    | 501.276378       | S    | 460.312960         | 230.660118      | 443.286411     | 222.146843        | <b>442.302395</b> | 221.654835        | 4  |
| 11 | 1132.640109 | 566.823692      | 1114.629544    | 557.818410       | L    | <b>373.280932</b>  | 187.144104      | 356.254383     | 178.630829        |                   |                   | 3  |
| 12 | 1245.724173 | 623.365724      | 1227.713608    | 614.360442       | L    | 260.196868         | 130.602072      | 243.170319     | 122.088797        |                   |                   | 2  |
| 13 |             |                 |                |                  | K    | 147.112804         | 74.060040       | 130.086255     | 65.546765         |                   |                   | 1  |

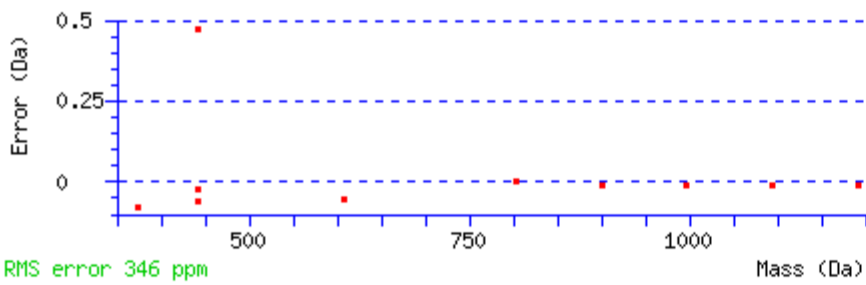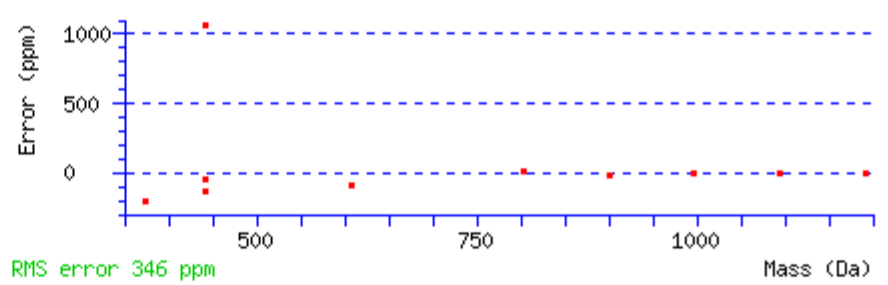

NCBI BLAST search of [VTPPPPVFSLLK](#)

(Parameters: blastp, nr protein database, expect=20000, no filter, PAM30)

Other BLAST [web gateways](#)

## All matches to this query

| Score | $M_r(\text{calc})$ : | Delta     | Sequence                      |
|-------|----------------------|-----------|-------------------------------|
| 32.6  | 1390.822433          | -0.012445 | <a href="#">VTPPPPVFSLLK</a>  |
| 2.7   | 1390.815704          | -0.005716 | <a href="#">TRHLVLAGGSKPR</a> |

Mascot: <http://www.matrixscience.com/>

# **MATRIX** SCIENCE Mascot Search Results

## Peptide View

MS/MS Fragmentation of **IAPESAIK**

Found in **SCMC2\_HUMAN**, Calcium-binding mitochondrial carrier protein SCaMC-2 OS=Homo sapiens GN=SLC25A25 PE=1 SV=1

Match to Query 2457: 827.476948 from(414.745750,2+) rtinseconds(1064) index(4725)

Title: Locus:1.1.1.1748.6

Data file 2011-11-10 - TFD - EP 3-4.mgf

Click mouse within plot area to zoom in by factor of two about that point

Or, Plot from  to  Da

Label all possible matches  Label matches used for scoring

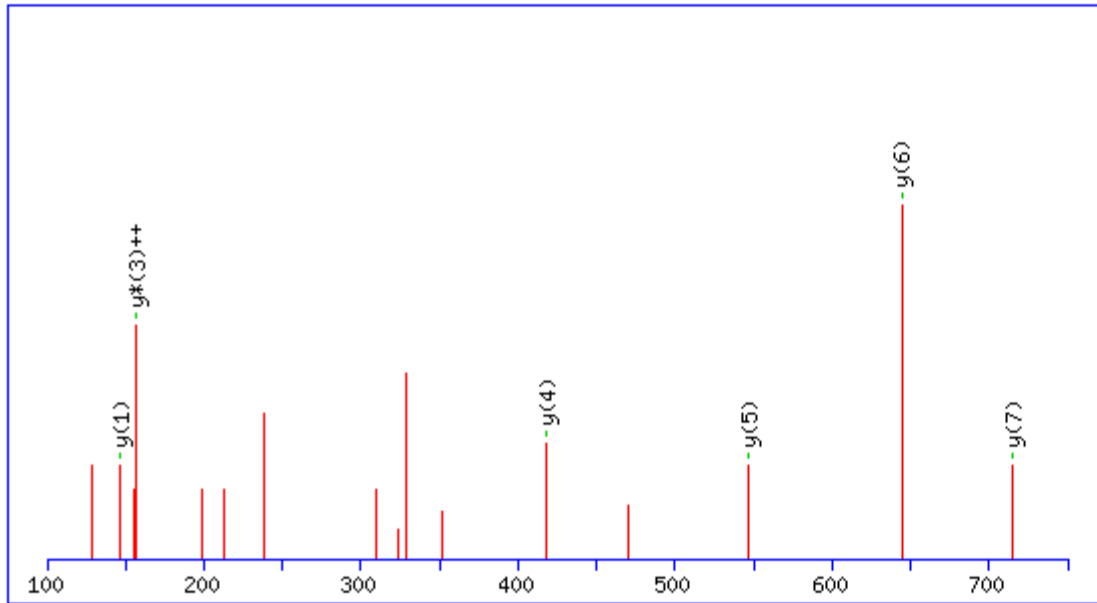

Monoisotopic mass of neutral peptide Mr(calc): 827.475235

Fixed modifications: Propionamide (C) (apply to specified residues or termini only)

Ions Score: 32 Expect: 0.0045

Matches : 6/58 fragment ions using 13 most intense peaks [\(help\)](#)

| # | b          | b <sup>++</sup> | b <sup>0</sup> | b <sup>0++</sup> | Seq. | y          | y <sup>++</sup> | y <sup>*</sup> | y <sup>*++</sup> | y <sup>0</sup> | y <sup>0++</sup> | # |
|---|------------|-----------------|----------------|------------------|------|------------|-----------------|----------------|------------------|----------------|------------------|---|
| 1 | 114.091340 | 57.549308       |                |                  | I    |            |                 |                |                  |                |                  | 8 |
| 2 | 185.128454 | 93.067865       |                |                  | A    | 715.398481 | 358.202879      | 698.371932     | 349.689604       | 697.387916     | 349.197596       | 7 |
| 3 | 282.181218 | 141.594247      |                |                  | P    | 644.361367 | 322.684322      | 627.334818     | 314.171047       | 626.350802     | 313.679039       | 6 |
| 4 | 411.223811 | 206.115544      | 393.213246     | 197.110261       | E    | 547.308603 | 274.157940      | 530.282054     | 265.644665       | 529.298038     | 265.152657       | 5 |
| 5 | 498.255839 | 249.631557      | 480.245274     | 240.626275       | S    | 418.266010 | 209.636643      | 401.239461     | 201.123368       | 400.255445     | 200.631360       | 4 |
| 6 | 569.292953 | 285.150115      | 551.282388     | 276.144832       | A    | 331.233982 | 166.120629      | 314.207433     | 157.607354       |                |                  | 3 |
| 7 | 682.377017 | 341.692147      | 664.366452     | 332.686864       | I    | 260.196868 | 130.602072      | 243.170319     | 122.088798       |                |                  | 2 |
| 8 |            |                 |                |                  | K    | 147.112804 | 74.060040       | 130.086255     | 65.546765        |                |                  | 1 |

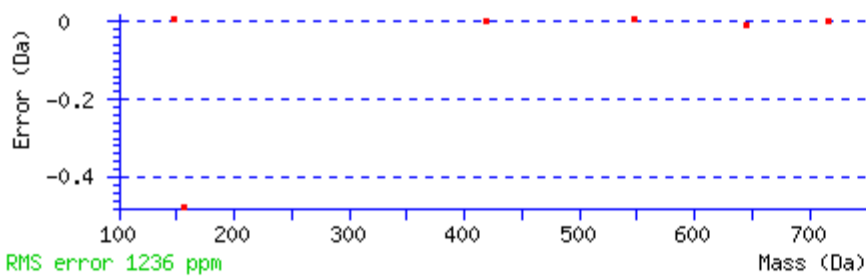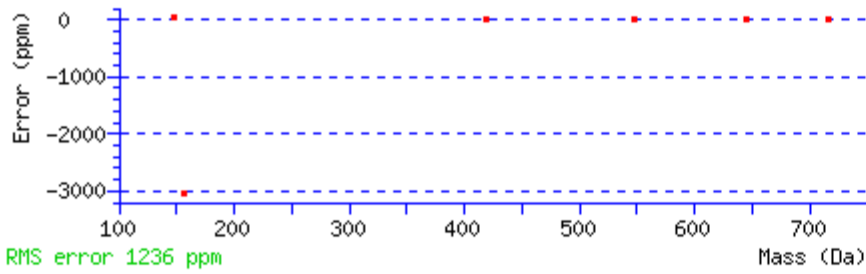

NCBI BLAST search of [IAPESAIK](#)

(Parameters: blastp, nr protein database, expect=20000, no filter, PAM30)

Other BLAST [web gateways](#)

All matches to this query

| Score | Mr(calc):  | Delta    | Sequence                 |
|-------|------------|----------|--------------------------|
| 31.7  | 827.475235 | 0.001713 | <a href="#">IAPESAIK</a> |
| 27.8  | 827.475250 | 0.001698 | <a href="#">IAPETAVK</a> |
| 8.7   | 827.475266 | 0.001682 | <a href="#">LPSGEVVK</a> |
| 6.7   | 827.475266 | 0.001682 | <a href="#">IAIVPDGK</a> |
| 6.0   | 827.475266 | 0.001682 | <a href="#">AIPGVVEK</a> |
| 5.2   | 827.475250 | 0.001698 | <a href="#">LVPKDEK</a>  |

**Peptide View**

MS/MS Fragmentation of **FYFENLLSK**

Found in **KCC2G\_HUMAN**, Calcium/calmodulin-dependent protein kinase type II subunit gamma OS=Homo sapiens GN=CAMK2G PE=1 SV=3

Match to Query 23789: 1159.600148 from(580.807350,2+) rtinseconds(3455) index(50951)

Title: Locus:1.1.1.2734.7

Data file 2011-11-10 - TFD - EP 3-3.mgf

Click mouse within plot area to zoom in by factor of two about that point

Or, Plot from  to  Da

Label all possible matches  Label matches used for scoring

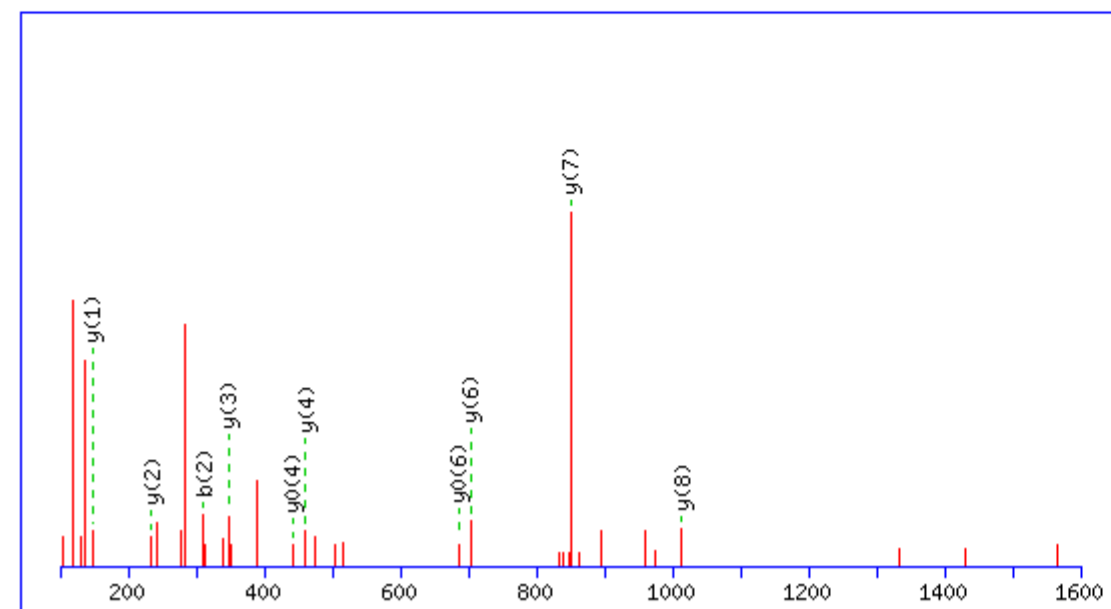

Monoisotopic mass of neutral peptide Mr(calc): 1159.591339

Fixed modifications: Propionamide (C) (apply to specified residues or termini only)

Ions Score: 31 Expect: 0.0068

Matches : 10/80 fragment ions using 28 most intense peaks [\(help\)](#)

| # | b                 | b <sup>++</sup> | b <sup>*</sup> | b <sup>+++</sup> | b <sup>0</sup> | b <sup>0++</sup> | Seq. | y                  | y <sup>++</sup> | y <sup>*</sup> | y <sup>+++</sup> | y <sup>0</sup>    | y <sup>0++</sup> | # |
|---|-------------------|-----------------|----------------|------------------|----------------|------------------|------|--------------------|-----------------|----------------|------------------|-------------------|------------------|---|
| 1 | 148.075690        | 74.541483       |                |                  |                |                  | F    |                    |                 |                |                  |                   |                  | 9 |
| 2 | <b>311.139019</b> | 156.073148      |                |                  |                |                  | Y    | <b>1013.530223</b> | 507.268750      | 996.503674     | 498.755475       | 995.519658        | 498.263467       | 8 |
| 3 | 458.207433        | 229.607354      |                |                  |                |                  | F    | <b>850.466894</b>  | 425.737085      | 833.440345     | 417.223811       | 832.456329        | 416.731803       | 7 |
| 4 | 587.250026        | 294.128651      |                |                  | 569.239461     | 285.123369       | E    | <b>703.398480</b>  | 352.202878      | 686.371931     | 343.689604       | <b>685.387915</b> | 343.197596       | 6 |
| 5 | 701.292953        | 351.150115      | 684.266404     | 342.636840       | 683.282388     | 342.144832       | N    | 574.355887         | 287.681582      | 557.329338     | 279.168307       | 556.345322        | 278.676299       | 5 |
| 6 | 814.377017        | 407.692147      | 797.350468     | 399.178872       | 796.366452     | 398.686864       | L    | <b>460.312960</b>  | 230.660118      | 443.286411     | 222.146843       | <b>442.302395</b> | 221.654835       | 4 |
| 7 | 927.461081        | 464.234179      | 910.434532     | 455.720904       | 909.450516     | 455.228896       | L    | <b>347.228896</b>  | 174.118086      | 330.202347     | 165.604811       | 329.218331        | 165.112803       | 3 |
| 8 | 1014.493109       | 507.750193      | 997.466560     | 499.236918       | 996.482544     | 498.744910       | S    | <b>234.144832</b>  | 117.576054      | 217.118283     | 109.062779       | 216.134267        | 108.570771       | 2 |
| 9 |                   |                 |                |                  |                |                  | K    | <b>147.112804</b>  | 74.060040       | 130.086255     | 65.546765        |                   |                  | 1 |

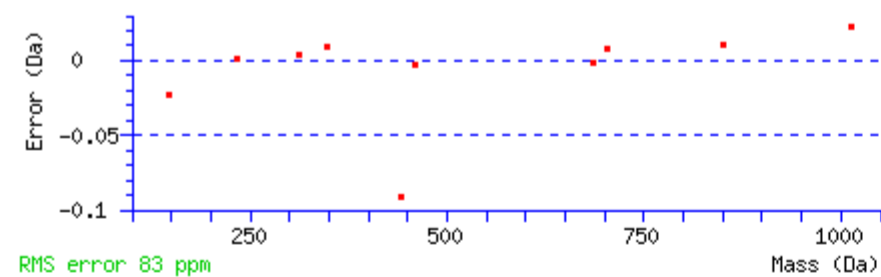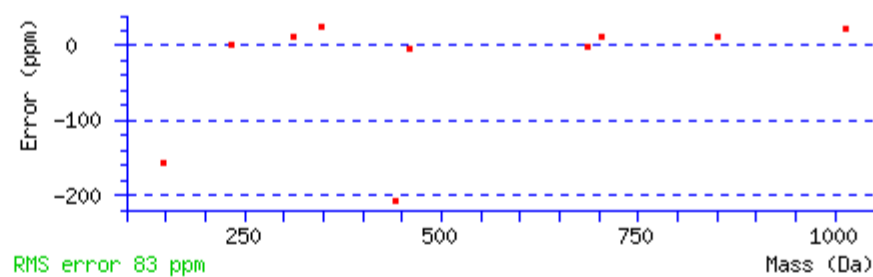

NCBI BLAST search of [FYFENLLSK](#)

(Parameters: blastp, nr protein database, expect=20000, no filter, PAM30)

Other BLAST [web gateways](#)

**All matches to this query**

| Score | Mr(calc):   | Delta     | Sequence                   |
|-------|-------------|-----------|----------------------------|
| 30.5  | 1159.591339 | 0.008809  | <a href="#">FYFENLLSK</a>  |
| 7.0   | 1159.598572 | 0.001576  | <a href="#">KPNPPPPPPR</a> |
| 4.0   | 1159.598557 | 0.001591  | <a href="#">WSSIPASKPR</a> |
| 1.3   | 1159.608429 | -0.008281 | <a href="#">NTEENLLSLK</a> |
| 1.3   | 1159.590714 | 0.009434  | <a href="#">QKPSVTPPMK</a> |
| 0.6   | 1159.598557 | 0.001591  | <a href="#">GPEATWRLSK</a> |

# MASCOT Search Results

## Peptide View

MS/MS Fragmentation of **LPNGALQNR**

Found in **CAMP2\_HUMAN**, Calmodulin-regulated spectrin-associated protein 2 OS=Homo sapiens GN=CAMSAP2 PE=1 SV=3

Match to Query 16135: 997.525368 from(499.769960,2+) rtinseconds(2480) index(31428)

Title: Locus:1.1.1.2384.11

Data file 2011-11-10 - TFD - EP 3-2.mgf

Click mouse within plot area to zoom in by factor of two about that point

Or, Plot from  to  Da

Label all possible matches  Label matches used for scoring

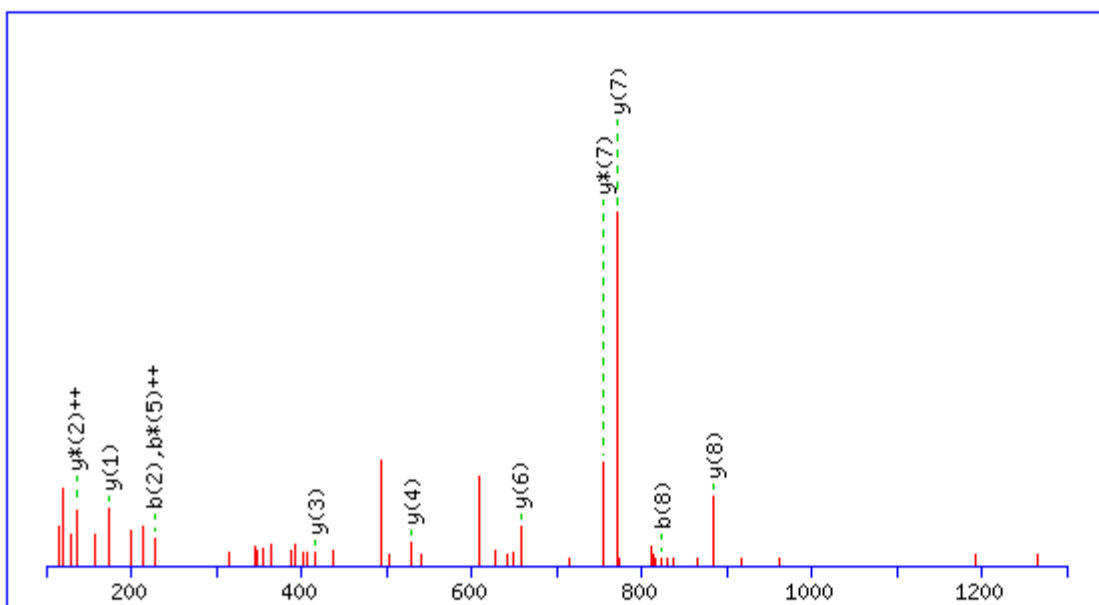

Monoisotopic mass of neutral peptide Mr(calc): 997.530472

Fixed modifications: Propionamide (C) (apply to specified residues or termini only)

Variable modifications:

P2 : Oxidation (P)

Ions Score: 32 Expect: 0.007

Matches : 11/60 fragment ions using 26 most intense peaks [\(help\)](#)

| # | b                 | b <sup>++</sup> | b <sup>*</sup> | b <sup>*++</sup>  | Seq. | y                 | y <sup>++</sup> | y <sup>*</sup>    | y <sup>*++</sup>  | # |
|---|-------------------|-----------------|----------------|-------------------|------|-------------------|-----------------|-------------------|-------------------|---|
| 1 | 114.091340        | 57.549308       |                |                   | L    |                   |                 |                   |                   | 9 |
| 2 | <b>227.139019</b> | 114.073147      |                |                   | P    | <b>885.453705</b> | 443.230491      | 868.427156        | 434.717216        | 8 |
| 3 | 341.181946        | 171.094611      | 324.155397     | 162.581336        | N    | <b>772.406026</b> | 386.706651      | <b>755.379477</b> | 378.193377        | 7 |
| 4 | 398.203410        | 199.605343      | 381.176861     | 191.092068        | G    | <b>658.363099</b> | 329.685188      | 641.336550        | 321.171913        | 6 |
| 5 | 469.240524        | 235.123900      | 452.213975     | <b>226.610626</b> | A    | 601.341635        | 301.174456      | 584.315086        | 292.661181        | 5 |
| 6 | 582.324588        | 291.665932      | 565.298039     | 283.152658        | L    | <b>530.304521</b> | 265.655899      | 513.277972        | 257.142624        | 4 |
| 7 | 710.383166        | 355.695221      | 693.356617     | 347.181947        | Q    | <b>417.220457</b> | 209.113866      | 400.193908        | 200.600592        | 3 |
| 8 | <b>824.426093</b> | 412.716685      | 807.399544     | 404.203410        | N    | 289.161879        | 145.084577      | 272.135330        | <b>136.571303</b> | 2 |
| 9 |                   |                 |                |                   | R    | <b>175.118952</b> | 88.063114       | 158.092403        | 79.549839         | 1 |

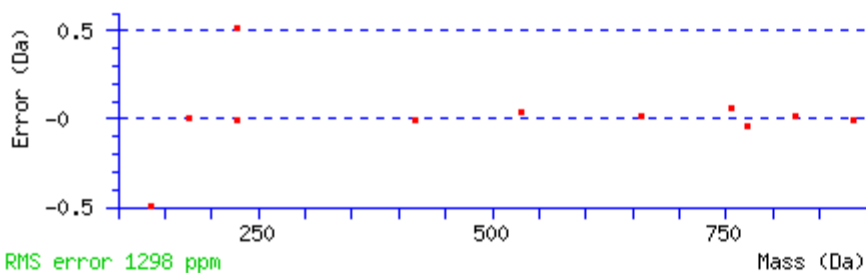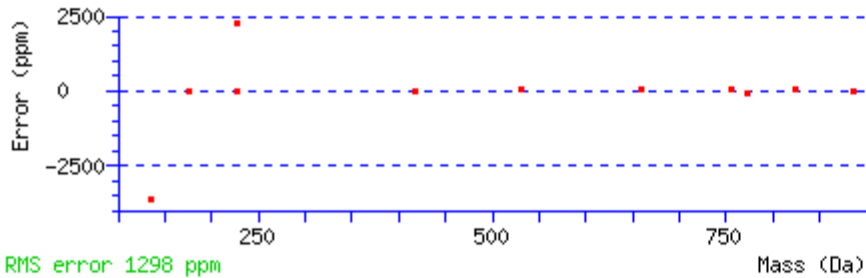

NCBI BLAST search of **LPNGALQNR**

(Parameters: blastp, nr protein database, expect=20000, no filter, PAM30)

Other BLAST [web gateways](#)

All matches to this query

| Score | Mr(calc):  | Delta     | Sequence                   |
|-------|------------|-----------|----------------------------|
| 31.8  | 997.530472 | -0.005104 | <a href="#">LPNGALQNR</a>  |
| 21.4  | 997.523270 | 0.002098  | <a href="#">ILYDFTAR</a>   |
| 13.8  | 997.519241 | 0.006127  | <a href="#">LPENKPPR</a>   |
| 13.2  | 997.530472 | -0.005104 | <a href="#">LPERNTPR</a>   |
| 12.6  | 997.519257 | 0.006111  | <a href="#">LLDQPSGPR</a>  |
| 12.6  | 997.515396 | 0.009972  | <a href="#">IYIDSLMK</a>   |
| 12.6  | 997.534500 | -0.009132 | <a href="#">LPPANWLR</a>   |
| 11.6  | 997.519257 | 0.006111  | <a href="#">LLDQPSGPR</a>  |
| 6.3   | 997.530487 | -0.005119 | <a href="#">LPPDTRQR</a>   |
| 6.0   | 997.519241 | 0.006127  | <a href="#">LTGPAAAEPR</a> |

**Peptide View**

MS/MS Fragmentation of **LDQEEFAR**

Found in **CAN13\_HUMAN**, Calpain-13 OS=Homo sapiens GN=CAPN13 PE=1 SV=2

Match to Query 17079: 1006.474028 from(504.244290,2+) rtinseconds(2013) index(22690)

Title: Locus:1.1.1.2209.23

Data file 2011-11-10 - TFD - EP 3-2.mgf

Click mouse within plot area to zoom in by factor of two about that point

Or, Plot from  to  Da

Label all possible matches  Label matches used for scoring

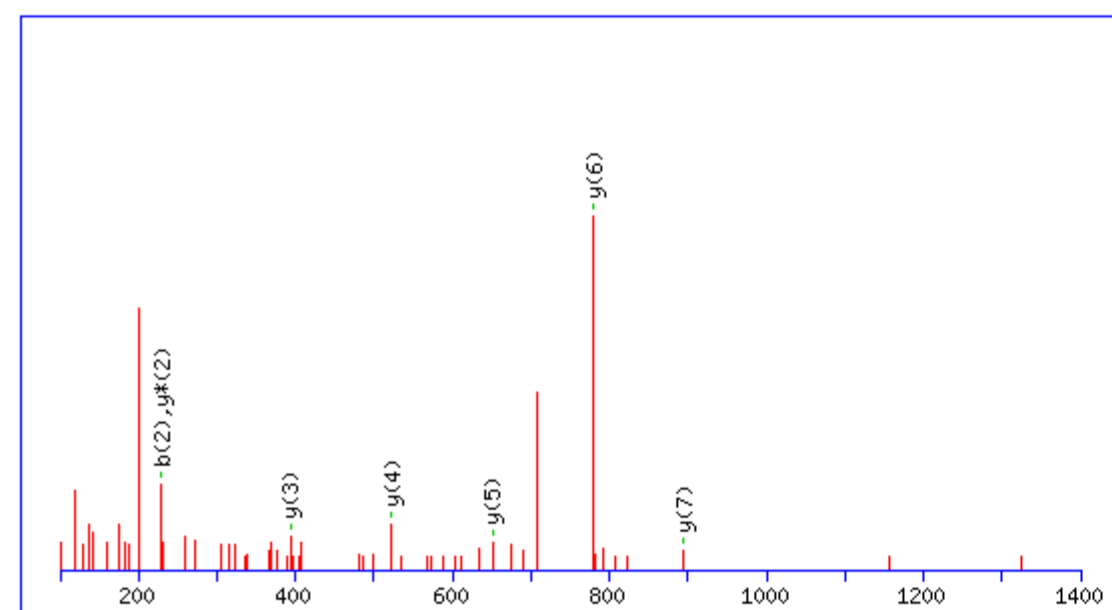

Monoisotopic mass of neutral peptide Mr(calc): 1006.471954

Fixed modifications: Propionamide (C) (apply to specified residues or termini only)

Ions Score: 39 Expect: 0.0014

Matches : 7/72 fragment ions using 8 most intense peaks [\(help\)](#)

| # | b                 | b <sup>++</sup> | b <sup>*</sup> | b <sup>*++</sup> | b <sup>0</sup> | b <sup>0++</sup> | Seq. | y                 | y <sup>++</sup> | y <sup>*</sup>    | y <sup>*++</sup> | y <sup>0</sup> | y <sup>0++</sup> | # |
|---|-------------------|-----------------|----------------|------------------|----------------|------------------|------|-------------------|-----------------|-------------------|------------------|----------------|------------------|---|
| 1 | 114.091340        | 57.549308       |                |                  |                |                  | L    |                   |                 |                   |                  |                |                  | 8 |
| 2 | <b>229.118283</b> | 115.062779      |                |                  | 211.107718     | 106.057497       | D    | <b>894.395187</b> | 447.701232      | 877.368638        | 439.187957       | 876.384622     | 438.695949       | 7 |
| 3 | 357.176861        | 179.092068      | 340.150312     | 170.578794       | 339.166296     | 170.086786       | Q    | <b>779.368244</b> | 390.187760      | 762.341695        | 381.674486       | 761.357679     | 381.182478       | 6 |
| 4 | 486.219454        | 243.613365      | 469.192905     | 235.100090       | 468.208889     | 234.608082       | E    | <b>651.309666</b> | 326.158471      | 634.283117        | 317.645197       | 633.299101     | 317.153189       | 5 |
| 5 | 615.262047        | 308.134662      | 598.235498     | 299.621387       | 597.251482     | 299.129379       | E    | <b>522.267073</b> | 261.637175      | 505.240524        | 253.123900       | 504.256508     | 252.631892       | 4 |
| 6 | 762.330461        | 381.668869      | 745.303912     | 373.155594       | 744.319896     | 372.663586       | F    | <b>393.224480</b> | 197.115878      | 376.197931        | 188.602603       |                |                  | 3 |
| 7 | 833.367575        | 417.187426      | 816.341026     | 408.674151       | 815.357010     | 408.182143       | A    | 246.156066        | 123.581671      | <b>229.129517</b> | 115.068396       |                |                  | 2 |
| 8 |                   |                 |                |                  |                |                  | R    | 175.118952        | 88.063114       | 158.092403        | 79.549839        |                |                  | 1 |

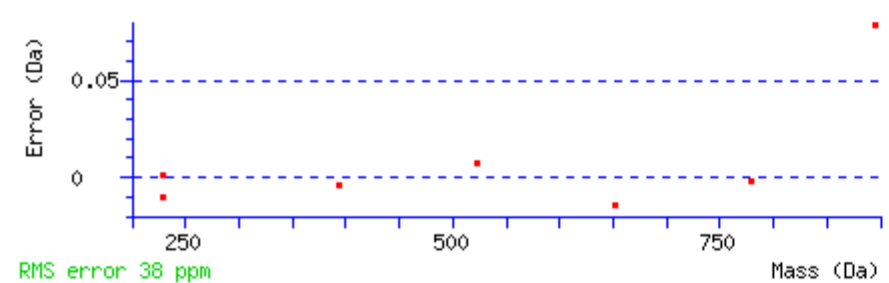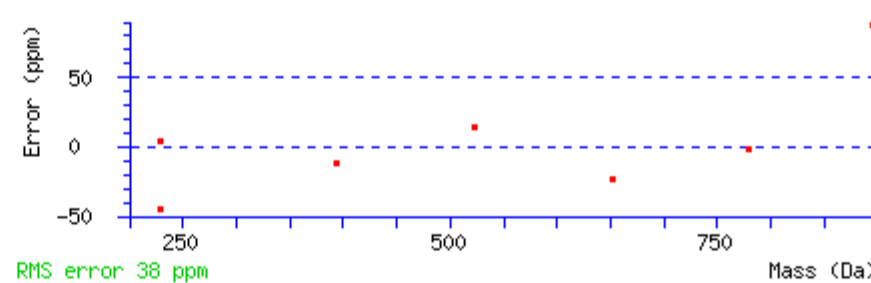

NCBI BLAST search of [LDQEEFAR](#)

(Parameters: blastp, nr protein database, expect=20000, no filter, PAM30)

Other BLAST [web gateways](#)

**All matches to this query**

| Score | Mr(calc):   | Delta     | Sequence                  |
|-------|-------------|-----------|---------------------------|
| 38.5  | 1006.471954 | 0.002074  | <a href="#">LDQEEFAR</a>  |
| 27.5  | 1006.471954 | 0.002074  | <a href="#">DLAGEEAFR</a> |
| 2.2   | 1006.475311 | -0.001283 | <a href="#">EAATNNLMK</a> |
| 1.7   | 1006.475342 | -0.001314 | <a href="#">TGLQCETGK</a> |
| 1.2   | 1006.464096 | 0.009932  | <a href="#">EVAEMDSVK</a> |
| 0.2   | 1006.471954 | 0.002074  | <a href="#">IDPQYAER</a>  |

# Mascot Search Results

## Peptide View

MS/MS Fragmentation of **TFDQLTPEESKER**

Found in **CALU\_HUMAN**, Calumenin OS=Homo sapiens GN=CALU PE=1 SV=2

Match to Query 13397: 1578.757392 from(527.259740,3+) rtinseconds(1586) index(14845)

Title: Locus:1.1.1.2091.29

Data file 2011-11-10 - TFD - EP 4-3.mgf

Click mouse within plot area to zoom in by factor of two about that point

Or, Plot from  to  Da

Label all possible matches  Label matches used for scoring

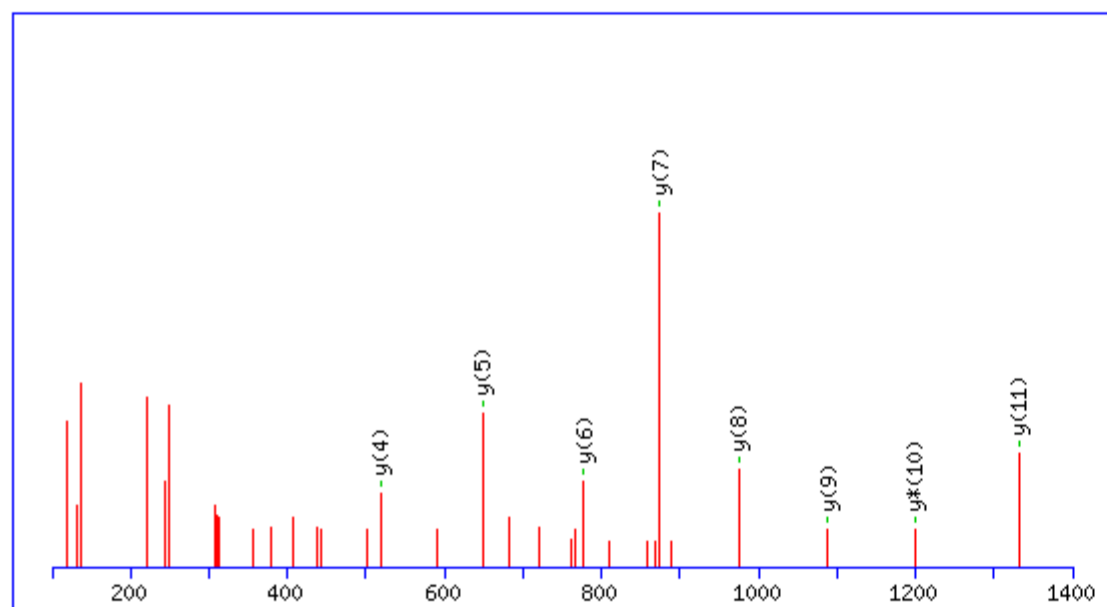

Monoisotopic mass of neutral peptide Mr(calc): 1578.752548

Fixed modifications: Propionamide (C) (apply to specified residues or termini only)

Ions Score: 50 Expect: 9.1e-005

Matches : 8/136 fragment ions using 12 most intense peaks ([help](#))

| #  | b           | b <sup>++</sup> | b <sup>*</sup> | b <sup>*++</sup> | b <sup>0</sup> | b <sup>0++</sup> | Seq. | y                  | y <sup>++</sup> | y <sup>*</sup>     | y <sup>*++</sup> | y <sup>0</sup> | y <sup>0++</sup> | #  |
|----|-------------|-----------------|----------------|------------------|----------------|------------------|------|--------------------|-----------------|--------------------|------------------|----------------|------------------|----|
| 1  | 102.054955  | 51.531116       |                |                  | 84.044390      | 42.525833        | T    |                    |                 |                    |                  |                |                  | 13 |
| 2  | 249.123369  | 125.065322      |                |                  | 231.112804     | 116.060040       | F    | 1478.712164        | 739.859720      | 1461.685615        | 731.346446       | 1460.701599    | 730.854438       | 12 |
| 3  | 364.150312  | 182.578794      |                |                  | 346.139747     | 173.573512       | D    | <b>1331.643750</b> | 666.325513      | 1314.617201        | 657.812239       | 1313.633185    | 657.320230       | 11 |
| 4  | 492.208890  | 246.608083      | 475.182341     | 238.094809       | 474.198325     | 237.602801       | Q    | 1216.616807        | 608.812042      | <b>1199.590258</b> | 600.298767       | 1198.606242    | 599.806759       | 10 |
| 5  | 605.292954  | 303.150115      | 588.266405     | 294.636841       | 587.282389     | 294.144833       | L    | <b>1088.558229</b> | 544.782753      | 1071.531680        | 536.269478       | 1070.547664    | 535.777470       | 9  |
| 6  | 706.340633  | 353.673955      | 689.314084     | 345.160680       | 688.330068     | 344.668672       | T    | <b>975.474165</b>  | 488.240721      | 958.447616         | 479.727446       | 957.463600     | 479.235438       | 8  |
| 7  | 803.393397  | 402.200337      | 786.366848     | 393.687062       | 785.382832     | 393.195054       | P    | <b>874.426486</b>  | 437.716881      | 857.399937         | 429.203607       | 856.415921     | 428.711599       | 7  |
| 8  | 932.435990  | 466.721633      | 915.409441     | 458.208359       | 914.425425     | 457.716351       | E    | <b>777.373722</b>  | 389.190499      | 760.347173         | 380.677225       | 759.363157     | 380.185217       | 6  |
| 9  | 1061.478583 | 531.242930      | 1044.452034    | 522.729655       | 1043.468018    | 522.237647       | E    | <b>648.331129</b>  | 324.669203      | 631.304580         | 316.155928       | 630.320564     | 315.663920       | 5  |
| 10 | 1148.510611 | 574.758944      | 1131.484062    | 566.245669       | 1130.500046    | 565.753661       | S    | <b>519.288536</b>  | 260.147906      | 502.261987         | 251.634632       | 501.277971     | 251.142624       | 4  |
| 11 | 1276.605574 | 638.806425      | 1259.579025    | 630.293151       | 1258.595009    | 629.801143       | K    | 432.256508         | 216.631892      | 415.229959         | 208.118617       | 414.245943     | 207.626609       | 3  |
| 12 | 1405.648167 | 703.327722      | 1388.621618    | 694.814447       | 1387.637602    | 694.322439       | E    | 304.161545         | 152.584410      | 287.134996         | 144.071136       | 286.150980     | 143.579128       | 2  |
| 13 |             |                 |                |                  |                |                  | R    | 175.118952         | 88.063114       | 158.092403         | 79.549839        |                |                  | 1  |

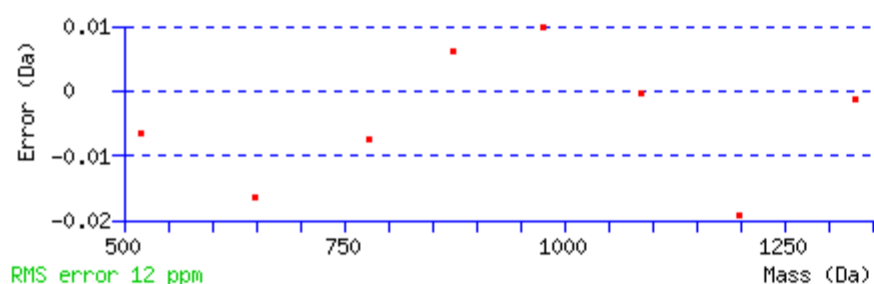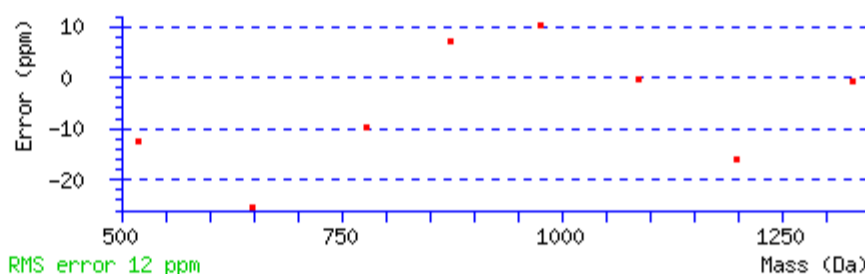

NCBI BLAST search of **TFDQLTPEESKER**

(Parameters: blastp, nr protein database, expect=20000, no filter, PAM30)

Other BLAST [web gateways](#)

All matches to this query

| Score | Mr(calc):   | Delta    | Sequence                      |
|-------|-------------|----------|-------------------------------|
| 50.2  | 1578.752548 | 0.004844 | <a href="#">TFDQLTPEESKER</a> |

Mascot: <http://www.matrixscience.com/>



# MASCOT Search Results

## Peptide View

MS/MS Fragmentation of **ILQAVNFPFLVK**

Found in **KAPCA\_HUMAN**, cAMP-dependent protein kinase catalytic subunit alpha OS=Homo sapiens GN=PRKACA PE=1 SV=2

Match to Query 42388: 1387.825968 from(694.920260,2+) rtinseconds(3794) index(56417)

Title: Locus:1.1.1.2824.14

Data file 2011-11-14 - TFD - EP 8-4.mgf

Click mouse within plot area to zoom in by factor of two about that point

Or, Plot from  to  Da

Label all possible matches  Label matches used for scoring

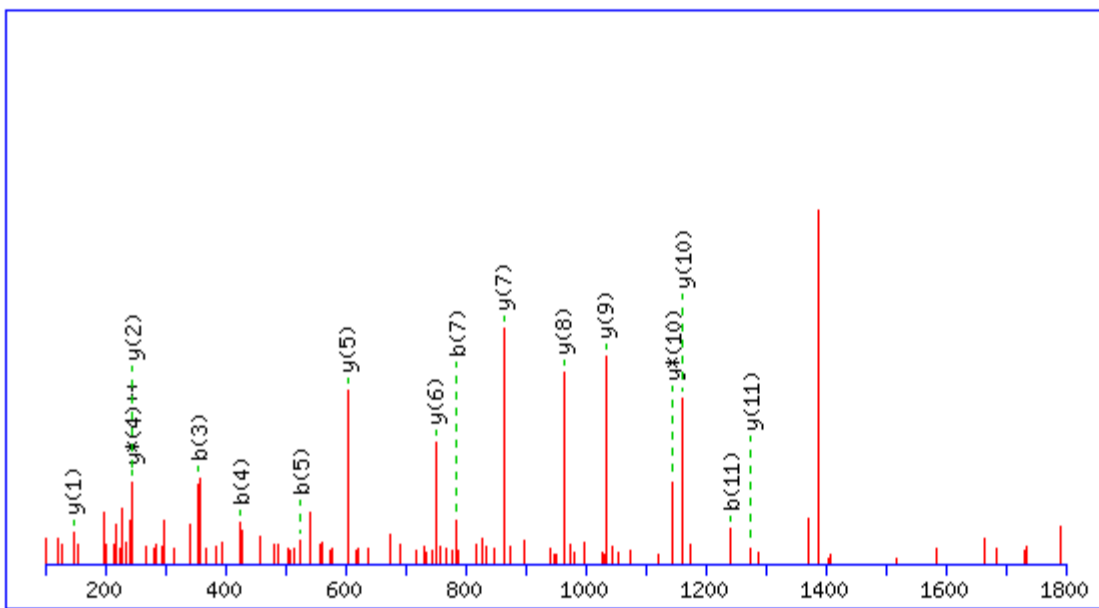

Monoisotopic mass of neutral peptide Mr(calc): 1387.822754

Fixed modifications: Propionamide (C) (apply to specified residues or termini only)

Ions Score: 71 Expect: 1.5e-007

Matches : 16/84 fragment ions using 25 most intense peaks ([help](#))

| #  | b           | b <sup>++</sup> | b <sup>*</sup> | b <sup>*++</sup> | Seq. | y           | y <sup>++</sup> | y <sup>*</sup> | y <sup>*++</sup> | #  |
|----|-------------|-----------------|----------------|------------------|------|-------------|-----------------|----------------|------------------|----|
| 1  | 114.091340  | 57.549308       |                |                  | I    |             |                 |                |                  | 12 |
| 2  | 227.175404  | 114.091340      |                |                  | L    | 1275.745971 | 638.376624      | 1258.719422    | 629.863349       | 11 |
| 3  | 355.233982  | 178.120629      | 338.207433     | 169.607355       | Q    | 1162.661907 | 581.834591      | 1145.635358    | 573.321317       | 10 |
| 4  | 426.271096  | 213.639186      | 409.244547     | 205.125912       | A    | 1034.603329 | 517.805303      | 1017.576780    | 509.292028       | 9  |
| 5  | 525.339510  | 263.173393      | 508.312961     | 254.660119       | V    | 963.566215  | 482.286745      | 946.539666     | 473.773471       | 8  |
| 6  | 639.382437  | 320.194857      | 622.355888     | 311.681582       | N    | 864.497801  | 432.752539      | 847.471252     | 424.239264       | 7  |
| 7  | 786.450851  | 393.729064      | 769.424302     | 385.215789       | F    | 750.454874  | 375.731075      | 733.428325     | 367.217801       | 6  |
| 8  | 883.503615  | 442.255446      | 866.477066     | 433.742171       | P    | 603.386460  | 302.196868      | 586.359911     | 293.683594       | 5  |
| 9  | 1030.572029 | 515.789652      | 1013.545480    | 507.276378       | F    | 506.333696  | 253.670486      | 489.307147     | 245.157211       | 4  |
| 10 | 1143.656093 | 572.331684      | 1126.629544    | 563.818410       | L    | 359.265282  | 180.136279      | 342.238733     | 171.623004       | 3  |
| 11 | 1242.724507 | 621.865891      | 1225.697958    | 613.352617       | V    | 246.181218  | 123.594247      | 229.154669     | 115.080973       | 2  |
| 12 |             |                 |                |                  | K    | 147.112804  | 74.060040       | 130.086255     | 65.546765        | 1  |

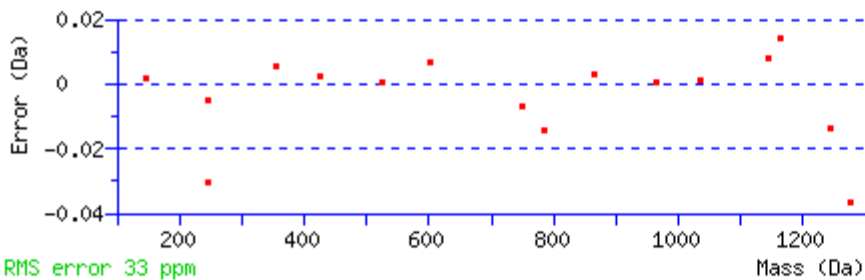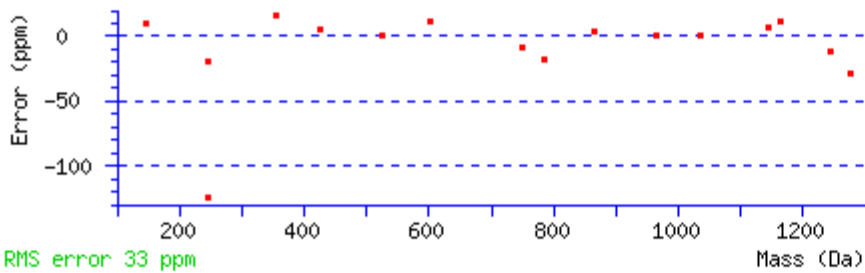

NCBI BLAST search of [ILQAVNFPFLVK](#)

(Parameters: blastp, nr protein database, expect=20000, no filter, PAM30)

Other BLAST [web gateways](#)

## All matches to this query

| Score | Mr(calc):   | Delta    | Sequence                      |
|-------|-------------|----------|-------------------------------|
| 71.1  | 1387.822754 | 0.003214 | <a href="#">ILQAVNFPFLVK</a>  |
| 2.9   | 1387.818726 | 0.007242 | <a href="#">KPSLLAHPGPLVK</a> |

# **MASCOT** Mascot Search Results

## Peptide View

MS/MS Fragmentation of **LAGLDINK**

Found in **IPKA\_HUMAN**, cAMP-dependent protein kinase inhibitor alpha OS=Homo sapiens GN=PKIA PE=1 SV=2

Match to Query 3098: 842.484808 from(422.249680,2+) rtinseconds(1177) index(7315)

Title: Locus:1.1.1.1861.10

Data file 2011-11-10 - TFD - EP 3-3.mgf

Click mouse within plot area to zoom in by factor of two about that point

Or, Plot from  to  Da

Label all possible matches  Label matches used for scoring

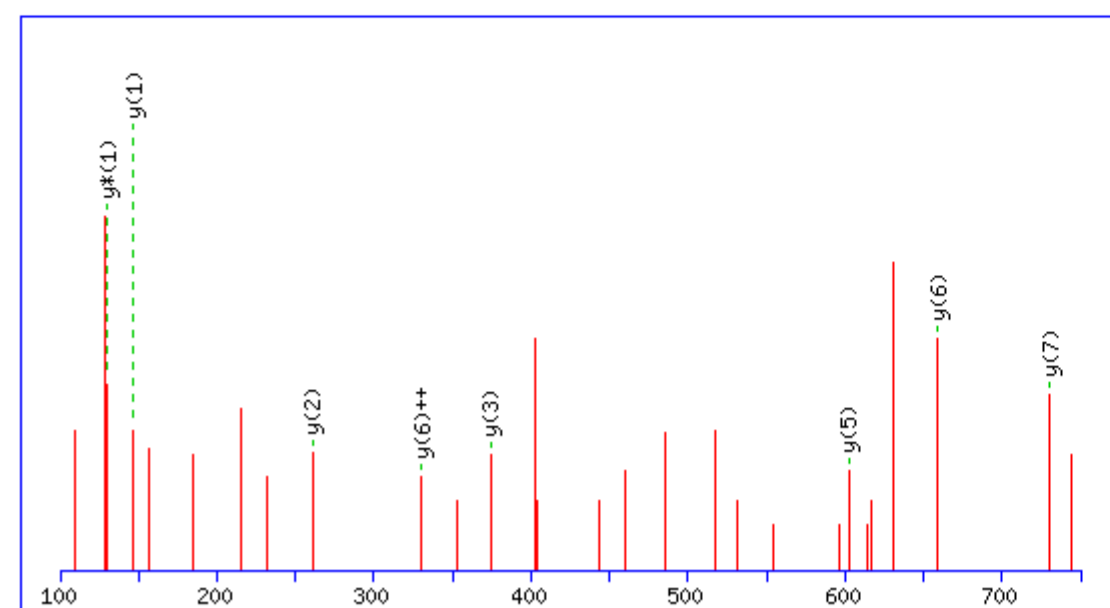

Monoisotopic mass of neutral peptide Mr(calc): 842.486145

Fixed modifications: Propionamide (C) (apply to specified residues or termini only)

Ions Score: 32 Expect: 0.0044

Matches : 8/58 fragment ions using 20 most intense peaks [\(help\)](#)

| # | b          | b <sup>++</sup> | b <sup>*</sup> | b <sup>+++</sup> | b <sup>0</sup> | b <sup>0++</sup> | Seq. | y                 | y <sup>++</sup>   | y <sup>*</sup>    | y <sup>+++</sup> | y <sup>0</sup> | y <sup>0++</sup> | # |
|---|------------|-----------------|----------------|------------------|----------------|------------------|------|-------------------|-------------------|-------------------|------------------|----------------|------------------|---|
| 1 | 114.091340 | 57.549308       |                |                  |                |                  | L    |                   |                   |                   |                  |                |                  | 8 |
| 2 | 185.128454 | 93.067865       |                |                  |                |                  | A    | <b>730.409380</b> | 365.708328        | 713.382831        | 357.195054       | 712.398815     | 356.703046       | 7 |
| 3 | 242.149918 | 121.578597      |                |                  |                |                  | G    | <b>659.372266</b> | <b>330.189771</b> | 642.345717        | 321.676497       | 641.361701     | 321.184489       | 6 |
| 4 | 355.233982 | 178.120629      |                |                  |                |                  | L    | <b>602.350802</b> | 301.679039        | 585.324253        | 293.165765       | 584.340237     | 292.673757       | 5 |
| 5 | 470.260925 | 235.634100      |                |                  | 452.250360     | 226.628818       | D    | 489.266738        | 245.137007        | 472.240189        | 236.623732       | 471.256173     | 236.131724       | 4 |
| 6 | 583.344989 | 292.176133      |                |                  | 565.334424     | 283.170850       | I    | <b>374.239795</b> | 187.623535        | 357.213246        | 179.110261       |                |                  | 3 |
| 7 | 697.387916 | 349.197596      | 680.361367     | 340.684322       | 679.377351     | 340.192314       | N    | <b>261.155731</b> | 131.081503        | 244.129182        | 122.568229       |                |                  | 2 |
| 8 |            |                 |                |                  |                |                  | K    | <b>147.112804</b> | 74.060040         | <b>130.086255</b> | 65.546765        |                |                  | 1 |

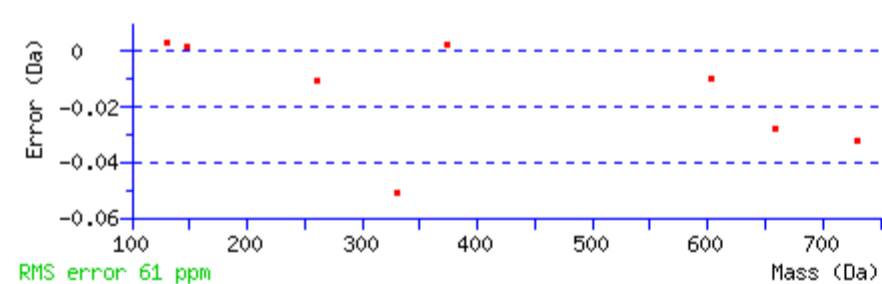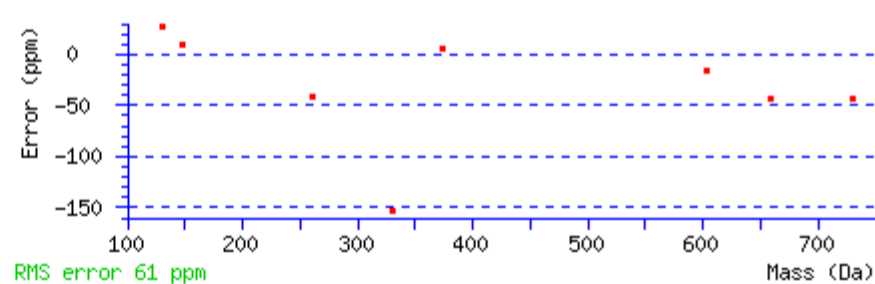

NCBI BLAST search of **LAGLDINK**

(Parameters: blastp, nr protein database, expect=20000, no filter, PAM30)

Other BLAST [web gateways](#)

## All matches to this query

| Score | Mr(calc):  | Delta     | Sequence                 |
|-------|------------|-----------|--------------------------|
| 31.6  | 842.486145 | -0.001337 | <a href="#">LAGLDINK</a> |
| 22.1  | 842.486160 | -0.001352 | <a href="#">VIEQLGGK</a> |
| 22.1  | 842.486145 | -0.001337 | <a href="#">VLQELNK</a>  |
| 10.6  | 842.486145 | -0.001337 | <a href="#">QLIDINK</a>  |
| 10.0  | 842.486130 | -0.001322 | <a href="#">LAAIAQEK</a> |
| 10.0  | 842.486145 | -0.001337 | <a href="#">ALLDGLNK</a> |
| 9.7   | 842.486130 | -0.001322 | <a href="#">LKEAPAAK</a> |
| 9.7   | 842.486130 | -0.001322 | <a href="#">LQEALAAK</a> |
| 8.9   | 842.486130 | -0.001322 | <a href="#">LLENNK</a>   |
| 8.0   | 842.486145 | -0.001337 | <a href="#">LQTPKEK</a>  |

# MASCOT Search Results

## Peptide View

MS/MS Fragmentation of **TGNESGSNLSDSGSVK**

Found in **CLIP2\_HUMAN**, CAP-Gly domain-containing linker protein 2 OS=Homo sapiens GN=CLIP2 PE=1 SV=1

Match to Query 867072: 1537.693528 from(769.854040,2+) rtinseconds(1073) index(159290)

Title: Locus:1.1.1.1093.30

Data file C:\Program Files (x86)\Matrix Science\Mascot Daemon\mgf3 TFD - Epitel - R2\mascot\_daemon\_merge.mgf

Click mouse within plot area to zoom in by factor of two about that point

Or, Plot from  to  Da

Label all possible matches  Label matches used for scoring

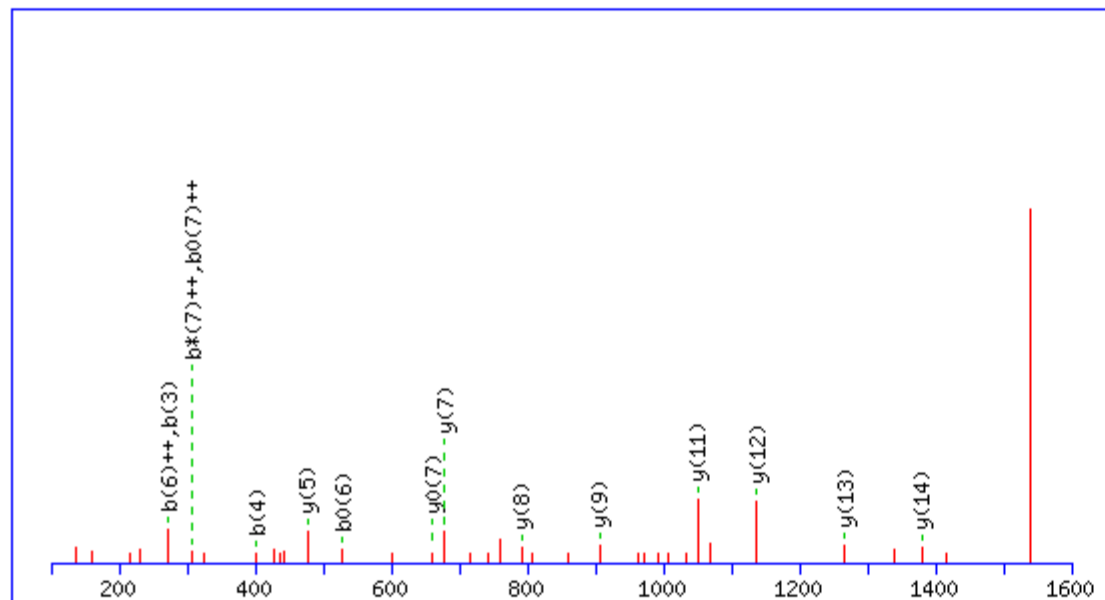

Monoisotopic mass of neutral peptide Mr(calc): 1537.685608

Fixed modifications: Carbamidomethyl (C) (apply to specified residues or termini only)

Ions Score: 54 Expect: 3.6e-005

Matches : 15/172 fragment ions using 22 most intense peaks [\(help\)](#)

| #  | b                 | b <sup>++</sup>   | b <sup>*</sup> | b <sup>*++</sup>  | b <sup>0</sup>    | b <sup>0++</sup>  | Seq. | y                  | y <sup>++</sup> | y <sup>*</sup> | y <sup>*++</sup> | y <sup>0</sup>    | y <sup>0++</sup> | #  |
|----|-------------------|-------------------|----------------|-------------------|-------------------|-------------------|------|--------------------|-----------------|----------------|------------------|-------------------|------------------|----|
| 1  | 102.054955        | 51.531116         |                |                   | 84.044390         | 42.525833         | T    |                    |                 |                |                  |                   |                  | 16 |
| 2  | 159.076419        | 80.041847         |                |                   | 141.065854        | 71.036565         | G    | 1437.645204        | 719.326240      | 1420.618655    | 710.812966       | 1419.634639       | 710.320958       | 15 |
| 3  | <b>273.119346</b> | 137.063311        | 256.092797     | 128.550037        | 255.108781        | 128.058029        | N    | <b>1380.623740</b> | 690.815508      | 1363.597191    | 682.302234       | 1362.613175       | 681.810226       | 14 |
| 4  | <b>402.161939</b> | 201.584608        | 385.135390     | 193.071333        | 384.151374        | 192.579325        | E    | <b>1266.580813</b> | 633.794045      | 1249.554264    | 625.280770       | 1248.570248       | 624.788762       | 13 |
| 5  | 489.193967        | 245.100621        | 472.167418     | 236.587347        | 471.183402        | 236.095339        | S    | <b>1137.538220</b> | 569.272748      | 1120.511671    | 560.759474       | 1119.527655       | 560.267466       | 12 |
| 6  | 546.215431        | <b>273.611354</b> | 529.188882     | 265.098079        | <b>528.204866</b> | 264.606071        | G    | <b>1050.506192</b> | 525.756734      | 1033.479643    | 517.243460       | 1032.495627       | 516.751452       | 11 |
| 7  | 633.247459        | 317.127368        | 616.220910     | <b>308.614093</b> | 615.236894        | <b>308.122085</b> | S    | 993.484728         | 497.246002      | 976.458179     | 488.732728       | 975.474163        | 488.240720       | 10 |
| 8  | 747.290386        | 374.148831        | 730.263837     | 365.635557        | 729.279821        | 365.143549        | N    | <b>906.452700</b>  | 453.729988      | 889.426151     | 445.216714       | 888.442135        | 444.724706       | 9  |
| 9  | 860.374450        | 430.690863        | 843.347901     | 422.177589        | 842.363885        | 421.685581        | L    | <b>792.409773</b>  | 396.708525      | 775.383224     | 388.195250       | 774.399208        | 387.703242       | 8  |
| 10 | 947.406478        | 474.206877        | 930.379929     | 465.693603        | 929.395913        | 465.201595        | S    | <b>679.325709</b>  | 340.166493      | 662.299160     | 331.653218       | <b>661.315144</b> | 331.161210       | 7  |
| 11 | 1062.433421       | 531.720349        | 1045.406872    | 523.207074        | 1044.422856       | 522.715066        | D    | 592.293681         | 296.650479      | 575.267132     | 288.137204       | 574.283116        | 287.645196       | 6  |
| 12 | 1149.465449       | 575.236363        | 1132.438900    | 566.723088        | 1131.454884       | 566.231080        | S    | <b>477.266738</b>  | 239.137007      | 460.240189     | 230.623733       | 459.256173        | 230.131725       | 5  |
| 13 | 1206.486913       | 603.747095        | 1189.460364    | 595.233820        | 1188.476348       | 594.741812        | G    | 390.234710         | 195.620993      | 373.208161     | 187.107719       | 372.224145        | 186.615711       | 4  |
| 14 | 1293.518941       | 647.263109        | 1276.492392    | 638.749834        | 1275.508376       | 638.257826        | S    | 333.213246         | 167.110261      | 316.186697     | 158.596987       | 315.202681        | 158.104979       | 3  |
| 15 | 1392.587355       | 696.797316        | 1375.560806    | 688.284041        | 1374.576790       | 687.792033        | V    | 246.181218         | 123.594247      | 229.154669     | 115.080973       |                   |                  | 2  |
| 16 |                   |                   |                |                   |                   |                   | K    | 147.112804         | 74.060040       | 130.086255     | 65.546765        |                   |                  | 1  |

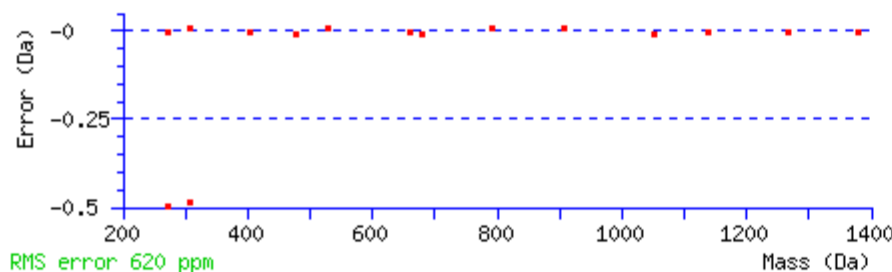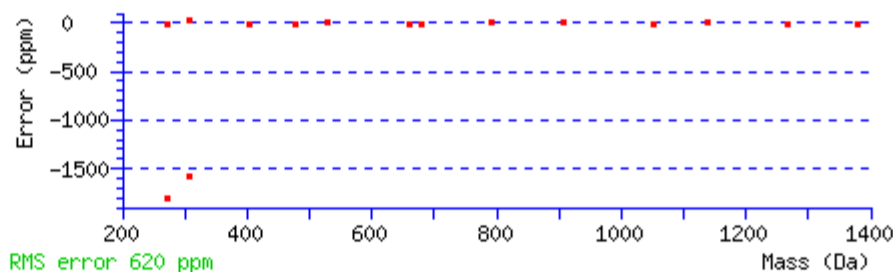

NCBI BLAST search of [TGNESGSNLSDSGSVK](#)

(Parameters: blastp, nr protein database, expect=20000, no filter, PAM30)

Other BLAST [web gateways](#)

All matches to this query

| Score | Mr(calc):   | Delta    | Sequence                         |
|-------|-------------|----------|----------------------------------|
| 54.2  | 1537.685608 | 0.007920 | <a href="#">TGNESGSNLSDSGSVK</a> |

Mascot: <http://www.matrixscience.com/>

# MASCOT SCIENCE Mascot Search Results

## Peptide View

MS/MS Fragmentation of **FDPSCLFPACR**

Found in **CAH3\_HUMAN**, Carbonic anhydrase 3 OS=Homo sapiens GN=CA3 PE=1 SV=3

Match to Query 714854: 1368.592568 from(685.303560,2+) rtinseconds(3223) index(1013030)

Title: Locus:1.1.1.1722.32

Data file C:\Program Files (x86)\Matrix Science\Mascot Daemon\mgf3 TFD - Epitel - R2\mascot\_daemon\_merge.mgf

Click mouse within plot area to zoom in by factor of two about that point

Or, Plot from  to  Da

Label all possible matches  Label matches used for scoring

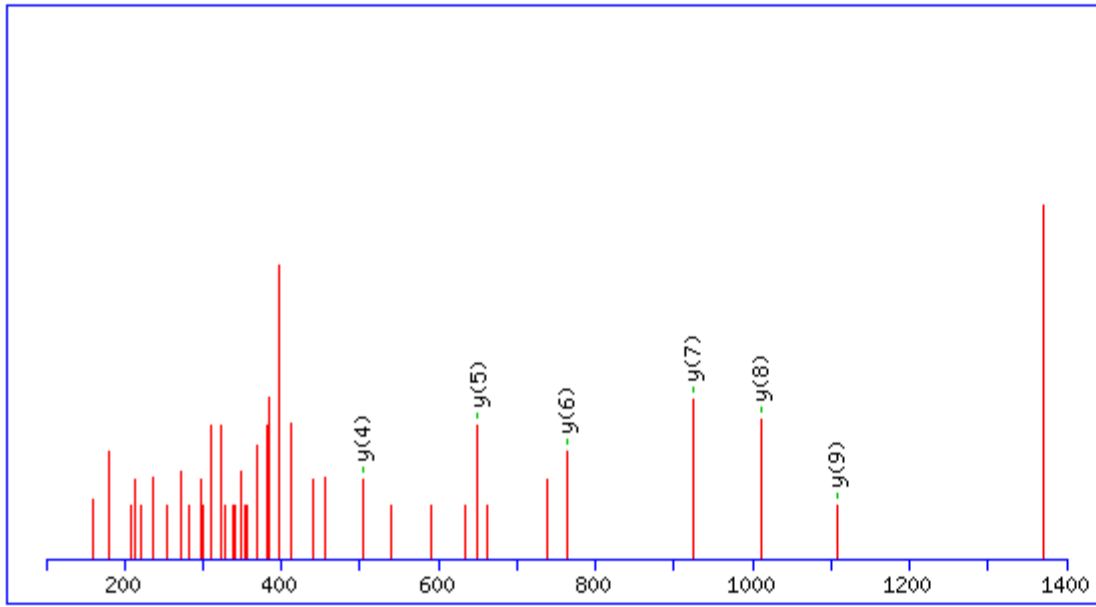

Monoisotopic mass of neutral peptide Mr(calc): 1368.595490

Fixed modifications: Carbamidomethyl (C) (apply to specified residues or termini only)

Ions Score: 38 Expect: 0.00086

Matches : 6/84 fragment ions using 10 most intense peaks ([help](#))

| #  | b           | b <sup>++</sup> | b <sup>0</sup> | b <sup>0++</sup> | Seq. | y                  | y <sup>++</sup> | y <sup>*</sup> | y <sup>*++</sup> | y <sup>0</sup> | y <sup>0++</sup> | #  |
|----|-------------|-----------------|----------------|------------------|------|--------------------|-----------------|----------------|------------------|----------------|------------------|----|
| 1  | 148.075690  | 74.541483       |                |                  | F    |                    |                 |                |                  |                |                  | 11 |
| 2  | 263.102633  | 132.054954      | 245.092068     | 123.049672       | D    | 1222.534341        | 611.770809      | 1205.507792    | 603.257534       | 1204.523776    | 602.765526       | 10 |
| 3  | 360.155397  | 180.581336      | 342.144832     | 171.576054       | P    | <b>1107.507398</b> | 554.257337      | 1090.480849    | 545.744063       | 1089.496833    | 545.252055       | 9  |
| 4  | 447.187425  | 224.097350      | 429.176860     | 215.092068       | S    | <b>1010.454634</b> | 505.730955      | 993.428085     | 497.217681       | 992.444069     | 496.725673       | 8  |
| 5  | 607.218074  | 304.112675      | 589.207509     | 295.107393       | C    | <b>923.422606</b>  | 462.214941      | 906.396057     | 453.701667       |                |                  | 7  |
| 6  | 720.302138  | 360.654707      | 702.291573     | 351.649425       | L    | <b>763.391957</b>  | 382.199617      | 746.365408     | 373.686342       |                |                  | 6  |
| 7  | 867.370552  | 434.188914      | 849.359987     | 425.183631       | F    | <b>650.307893</b>  | 325.657585      | 633.281344     | 317.144310       |                |                  | 5  |
| 8  | 964.423316  | 482.715296      | 946.412751     | 473.710014       | P    | <b>503.239479</b>  | 252.123378      | 486.212930     | 243.610103       |                |                  | 4  |
| 9  | 1035.460430 | 518.233853      | 1017.449865    | 509.228571       | A    | 406.186715         | 203.596996      | 389.160166     | 195.083721       |                |                  | 3  |
| 10 | 1195.491079 | 598.249178      | 1177.480514    | 589.243895       | C    | 335.149601         | 168.078438      | 318.123052     | 159.565164       |                |                  | 2  |
| 11 |             |                 |                |                  | R    | 175.118952         | 88.063114       | 158.092403     | 79.549839        |                |                  | 1  |

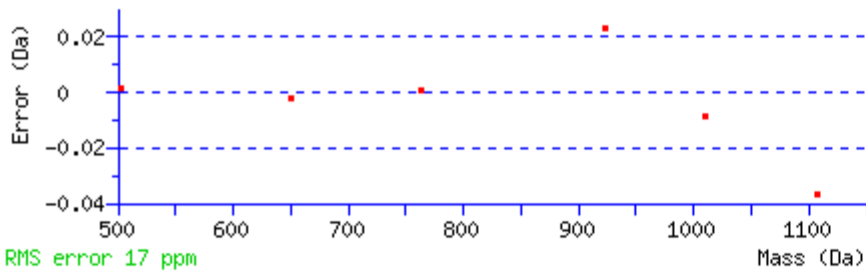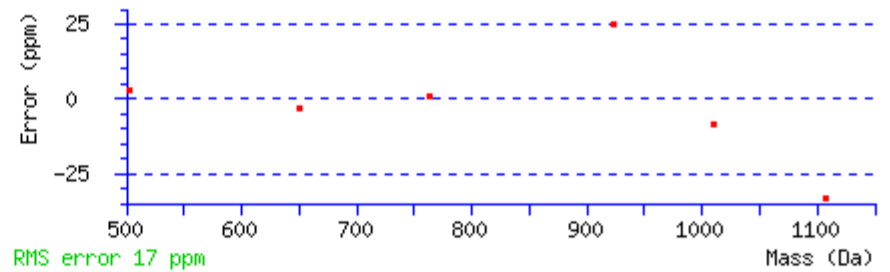

NCBI BLAST search of [FDPSCLFPACR](#)

(Parameters: blastp, nr protein database, expect=20000, no filter, PAM30)

Other BLAST [web gateways](#)

## All matches to this query

| Score | Mr(calc):   | Delta     | Sequence                    |
|-------|-------------|-----------|-----------------------------|
| 37.8  | 1368.595490 | -0.002922 | <a href="#">FDPSCLFPACR</a> |

Mascot: <http://www.matrixscience.com/>

# MASCOT Search Results

## Peptide View

MS/MS Fragmentation of **VNFLVNAAGINR**

Found in **CBR4\_HUMAN**, Carbonyl reductase family member 4 OS=Homo sapiens GN=CBR4 PE=1 SV=3

Match to Query 35990: 1286.713048 from(644.363800,2+) rtinseconds(2781) index(36066)

Title: Locus:1.1.1.2379.27

Data file 2011-11-14 - TFD - EP 8-5.mgf

Click mouse within plot area to zoom in by factor of two about that point

Or, Plot from  to  Da

Label all possible matches  Label matches used for scoring

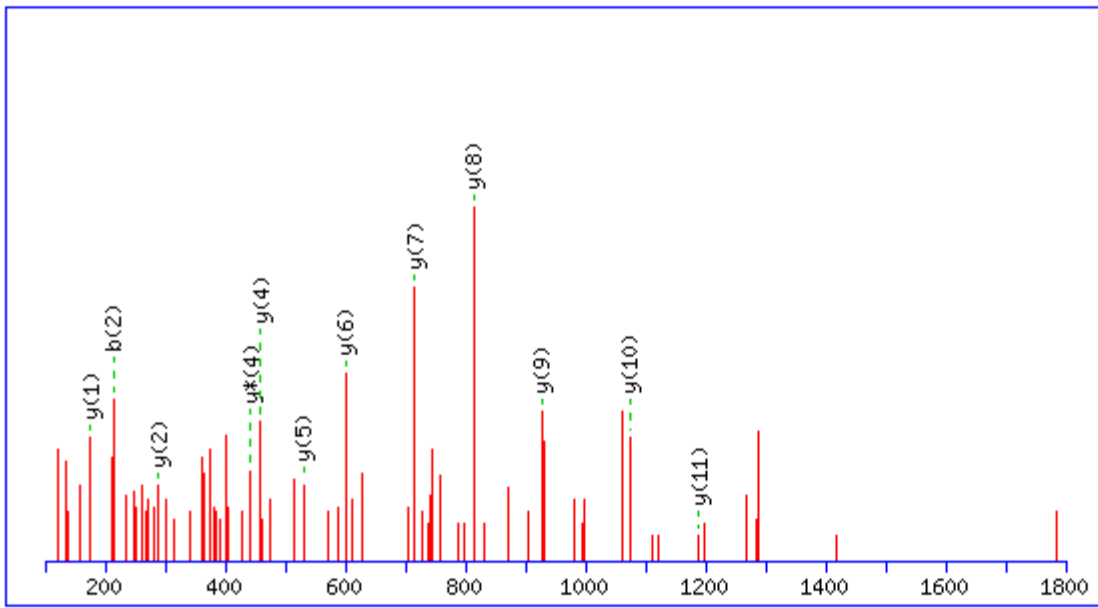

Monoisotopic mass of neutral peptide Mr(calc): 1286.709503

Fixed modifications: Propionamide (C) (apply to specified residues or termini only)

Ions Score: 70 Expect: 6.7e-007

Matches : 12/86 fragment ions using 24 most intense peaks ([help](#))

| #  | b           | b <sup>++</sup> | b <sup>*</sup> | b <sup>++</sup> | Seq. | y           | y <sup>++</sup> | y <sup>*</sup> | y <sup>++</sup> | #  |
|----|-------------|-----------------|----------------|-----------------|------|-------------|-----------------|----------------|-----------------|----|
| 1  | 100.075690  | 50.541483       |                |                 | V    |             |                 |                |                 | 12 |
| 2  | 214.118617  | 107.562947      | 197.092068     | 99.049672       | N    | 1188.648381 | 594.827829      | 1171.621832    | 586.314554      | 11 |
| 3  | 361.187031  | 181.097153      | 344.160482     | 172.583879      | F    | 1074.605454 | 537.806365      | 1057.578905    | 529.293091      | 10 |
| 4  | 474.271095  | 237.639186      | 457.244546     | 229.125911      | L    | 927.537040  | 464.272158      | 910.510491     | 455.758884      | 9  |
| 5  | 573.339509  | 287.173393      | 556.312960     | 278.660118      | V    | 814.452976  | 407.730126      | 797.426427     | 399.216852      | 8  |
| 6  | 687.382436  | 344.194856      | 670.355887     | 335.681581      | N    | 715.384562  | 358.195919      | 698.358013     | 349.682645      | 7  |
| 7  | 758.419550  | 379.713413      | 741.393001     | 371.200138      | A    | 601.341635  | 301.174456      | 584.315086     | 292.661181      | 6  |
| 8  | 829.456664  | 415.231970      | 812.430115     | 406.718695      | A    | 530.304521  | 265.655899      | 513.277972     | 257.142624      | 5  |
| 9  | 886.478128  | 443.742702      | 869.451579     | 435.229427      | G    | 459.267407  | 230.137342      | 442.240858     | 221.624067      | 4  |
| 10 | 999.562192  | 500.284734      | 982.535643     | 491.771459      | I    | 402.245943  | 201.626610      | 385.219394     | 193.113335      | 3  |
| 11 | 1113.605119 | 557.306198      | 1096.578570    | 548.792923      | N    | 289.161879  | 145.084577      | 272.135330     | 136.571303      | 2  |
| 12 |             |                 |                |                 | R    | 175.118952  | 88.063114       | 158.092403     | 79.549839       | 1  |

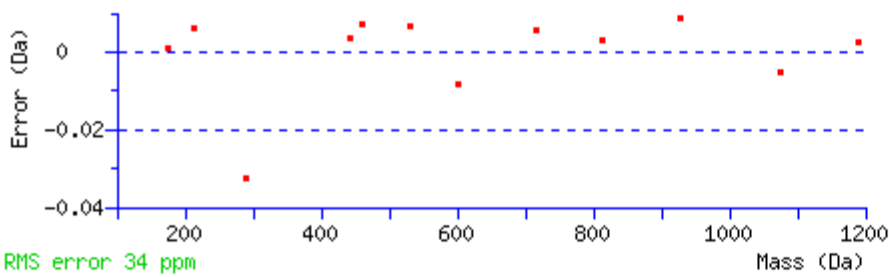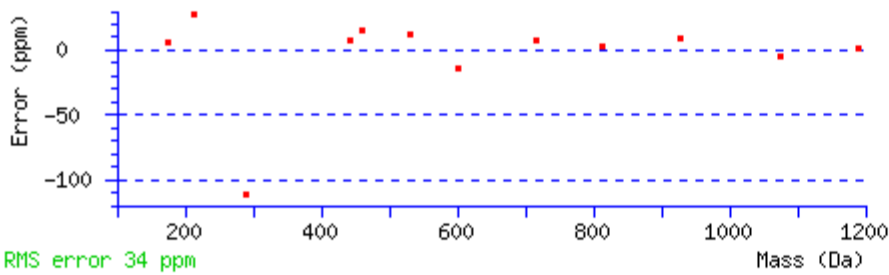

NCBI BLAST search of [VNFLVNAAGINR](#)

(Parameters: blastp, nr protein database, expect=20000, no filter, PAM30)

Other BLAST [web gateways](#)

## All matches to this query

| Score | Mr(calc):   | Delta     | Sequence                     |
|-------|-------------|-----------|------------------------------|
| 70.1  | 1286.709503 | 0.003545  | <a href="#">VNFLVNAAGINR</a> |
| 4.2   | 1286.709488 | 0.003560  | <a href="#">VAAELWRSLSR</a>  |
| 2.5   | 1286.723434 | -0.010386 | <a href="#">LPPVLTFLSR</a>   |
| 2.3   | 1286.712875 | 0.000173  | <a href="#">VGGDSMLARLLR</a> |

# **MATRIX** SCIENCE Mascot Search Results

## Peptide View

MS/MS Fragmentation of **AGVSVYGIVK**

Found in **CMBL\_HUMAN**, Carboxymethylenebutenolidase homolog OS=Homo sapiens GN=CMBL PE=1 SV=1

Match to Query 15195: 991.570148 from(496.792350,2+) rtinseconds(2304) index(27124)

Title: Locus:1.1.1.2169.12

Data file 2011-11-12 - TFD - EP 6-5.mgf

Click mouse within plot area to zoom in by factor of two about that point

Or, Plot from  to  Da

Label all possible matches  Label matches used for scoring

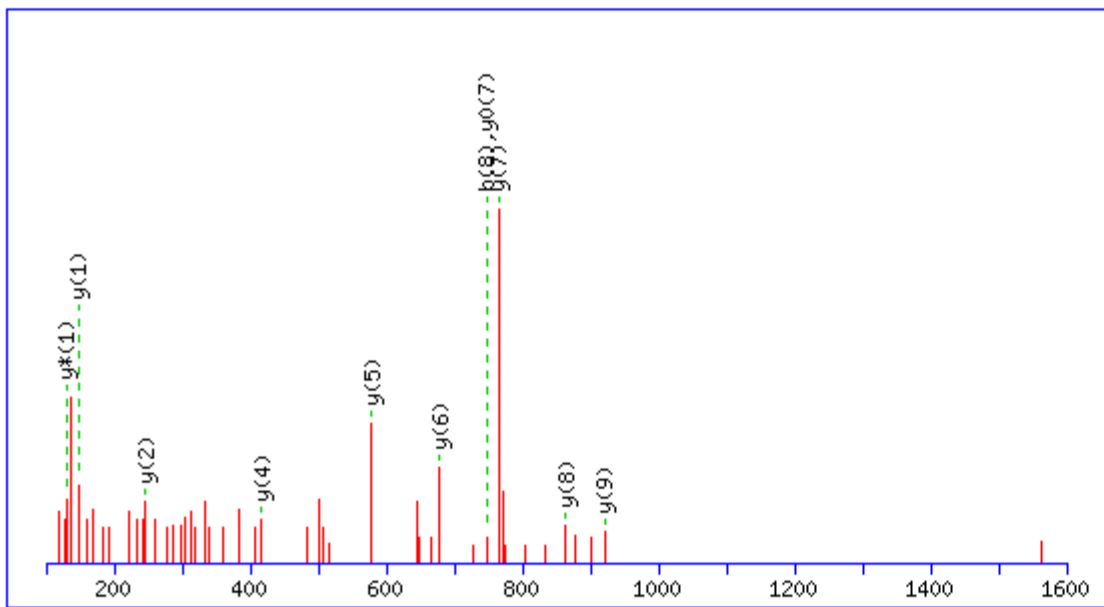

Monoisotopic mass of neutral peptide Mr(calc): 991.570236

Fixed modifications: Propionamide (C) (apply to specified residues or termini only)

Ions Score: 50 Expect: 3.9e-005

Matches : 11/72 fragment ions using 24 most intense peaks [\(help\)](#)

| #  | b          | b <sup>++</sup> | b <sup>0</sup> | b <sup>0++</sup> | Seq. | y          | y <sup>++</sup> | y <sup>*</sup> | y <sup>*++</sup> | y <sup>0</sup> | y <sup>0++</sup> | #  |
|----|------------|-----------------|----------------|------------------|------|------------|-----------------|----------------|------------------|----------------|------------------|----|
| 1  | 72.044390  | 36.525833       |                |                  | A    |            |                 |                |                  |                |                  | 10 |
| 2  | 129.065854 | 65.036565       |                |                  | G    | 921.540395 | 461.273836      | 904.513846     | 452.760561       | 903.529830     | 452.268553       | 9  |
| 3  | 228.134268 | 114.570772      |                |                  | V    | 864.518931 | 432.763104      | 847.492382     | 424.249829       | 846.508366     | 423.757821       | 8  |
| 4  | 315.166296 | 158.086786      | 297.155731     | 149.081504       | S    | 765.450517 | 383.228897      | 748.423968     | 374.715622       | 747.439952     | 374.223614       | 7  |
| 5  | 414.234710 | 207.620993      | 396.224145     | 198.615711       | V    | 678.418489 | 339.712883      | 661.391940     | 331.199608       |                |                  | 6  |
| 6  | 577.298039 | 289.152658      | 559.287474     | 280.147375       | Y    | 579.350075 | 290.178676      | 562.323526     | 281.665401       |                |                  | 5  |
| 7  | 634.319503 | 317.663390      | 616.308938     | 308.658107       | G    | 416.286746 | 208.647011      | 399.260197     | 200.133737       |                |                  | 4  |
| 8  | 747.403567 | 374.205422      | 729.393002     | 365.200139       | I    | 359.265282 | 180.136279      | 342.238733     | 171.623004       |                |                  | 3  |
| 9  | 846.471981 | 423.739629      | 828.461416     | 414.734346       | V    | 246.181218 | 123.594247      | 229.154669     | 115.080972       |                |                  | 2  |
| 10 |            |                 |                |                  | K    | 147.112804 | 74.060040       | 130.086255     | 65.546765        |                |                  | 1  |

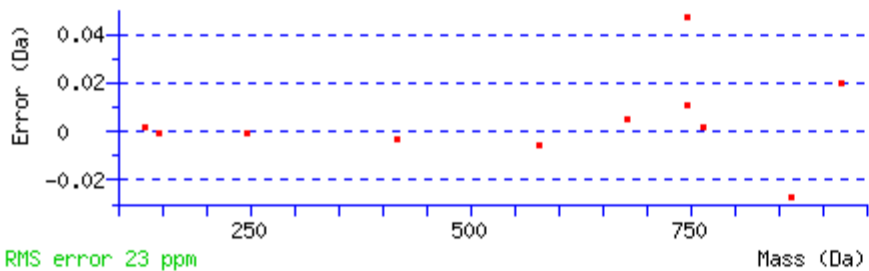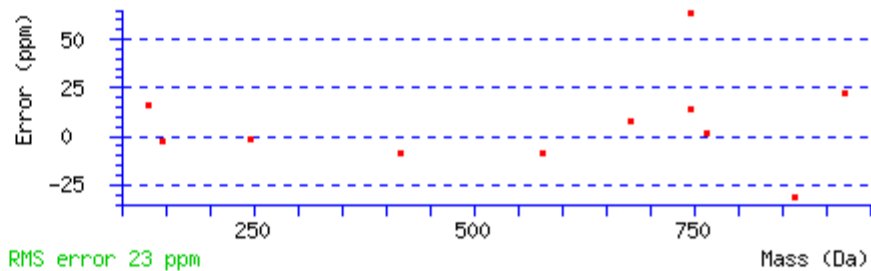

NCBI BLAST search of **AGVSVYGIVK**

(Parameters: blastp, nr protein database, expect=20000, no filter, PAM30)

Other BLAST [web gateways](#)

## All matches to this query

| Score | Mr(calc):  | Delta     | Sequence                   |
|-------|------------|-----------|----------------------------|
| 50.1  | 991.570236 | -0.000088 | <a href="#">AGVSVYGIVK</a> |
| 3.0   | 991.570221 | -0.000073 | <a href="#">APISFSKVK</a>  |
| 2.9   | 991.570221 | -0.000073 | <a href="#">QSASFILVK</a>  |
| 1.3   | 991.570206 | -0.000058 | <a href="#">KLINDYVK</a>   |

Mascot: <http://www.matrixscience.com/>

# MASCOT Search Results

## Peptide View

MS/MS Fragmentation of **SEYNDQLTR**

Found in **CPT2\_HUMAN**, Carnitine O-palmitoyltransferase 2, mitochondrial OS=Homo sapiens GN=CPT2 PE=1 SV=2

Match to Query 424975: 1124.510008 from(563.262280,2+) rtinseconds(1304) index(416830)

Title: Locus:1.1.1.834.32

Data file C:\Program Files (x86)\Matrix Science\Mascot Daemon\mgf\3 TFD - Epitel - R2\mascot\_daemon\_merge.mgf

Click mouse within plot area to zoom in by factor of two about that point

Or, Plot from  to  Da

Label all possible matches  Label matches used for scoring

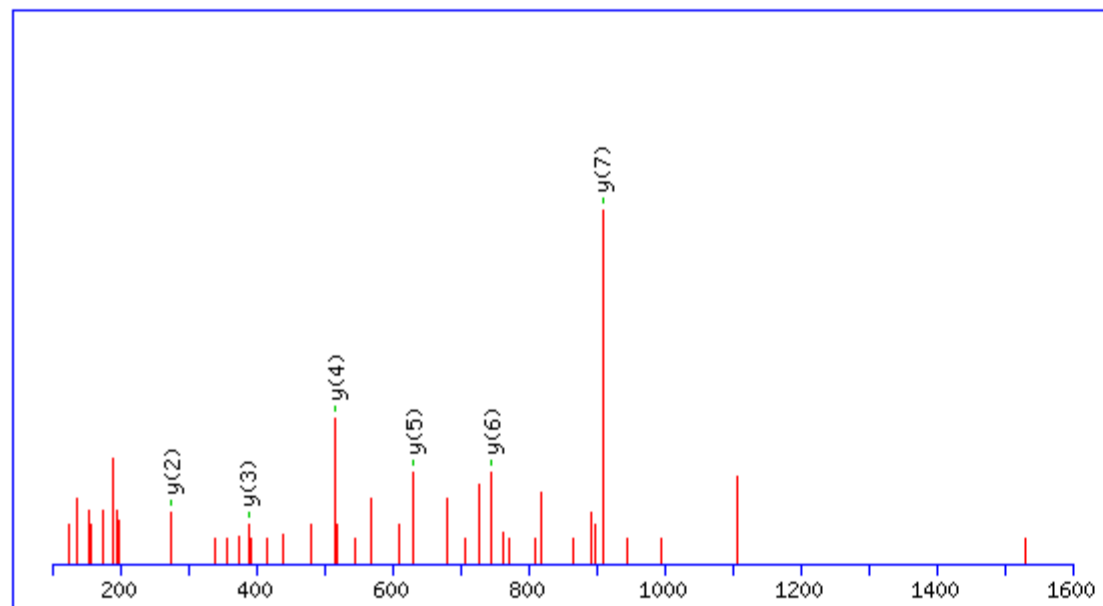

Monoisotopic mass of neutral peptide Mr(calc): 1124.509796

Fixed modifications: Carbamidomethyl (C) (apply to specified residues or termini only)

Ions Score: 47 Expect: 0.00014

Matches : 6/88 fragment ions using 10 most intense peaks ([help](#))

| # | b          | b <sup>++</sup> | b <sup>*</sup> | b <sup>+++</sup> | b <sup>0</sup> | b <sup>0++</sup> | Seq. | y           | y <sup>++</sup> | y <sup>*</sup> | y <sup>+++</sup> | y <sup>0</sup> | y <sup>0++</sup> | # |
|---|------------|-----------------|----------------|------------------|----------------|------------------|------|-------------|-----------------|----------------|------------------|----------------|------------------|---|
| 1 | 88.039304  | 44.523290       |                |                  | 70.028739      | 35.518008        | S    |             |                 |                |                  |                |                  | 9 |
| 2 | 217.081897 | 109.044586      |                |                  | 199.071332     | 100.039304       | E    | 1038.485065 | 519.746171      | 1021.458516    | 511.232896       | 1020.474500    | 510.740888       | 8 |
| 3 | 380.145226 | 190.576251      |                |                  | 362.134661     | 181.570969       | Y    | 909.442472  | 455.224874      | 892.415923     | 446.711600       | 891.431907     | 446.219592       | 7 |
| 4 | 494.188153 | 247.597715      | 477.161604     | 239.084440       | 476.177588     | 238.592432       | N    | 746.379143  | 373.693210      | 729.352594     | 365.179935       | 728.368578     | 364.687927       | 6 |
| 5 | 609.215096 | 305.111186      | 592.188547     | 296.597912       | 591.204531     | 296.105904       | D    | 632.336216  | 316.671746      | 615.309667     | 308.158472       | 614.325651     | 307.666464       | 5 |
| 6 | 737.273674 | 369.140475      | 720.247125     | 360.627201       | 719.263109     | 360.135193       | Q    | 517.309273  | 259.158275      | 500.282724     | 250.645000       | 499.298708     | 250.152992       | 4 |
| 7 | 850.357738 | 425.682507      | 833.331189     | 417.169233       | 832.347173     | 416.677225       | L    | 389.250695  | 195.128985      | 372.224146     | 186.615711       | 371.240130     | 186.123703       | 3 |
| 8 | 951.405417 | 476.206347      | 934.378868     | 467.693072       | 933.394852     | 467.201064       | T    | 276.166631  | 138.586953      | 259.140082     | 130.073679       | 258.156066     | 129.581671       | 2 |
| 9 |            |                 |                |                  |                |                  | R    | 175.118952  | 88.063114       | 158.092403     | 79.549839        |                |                  | 1 |

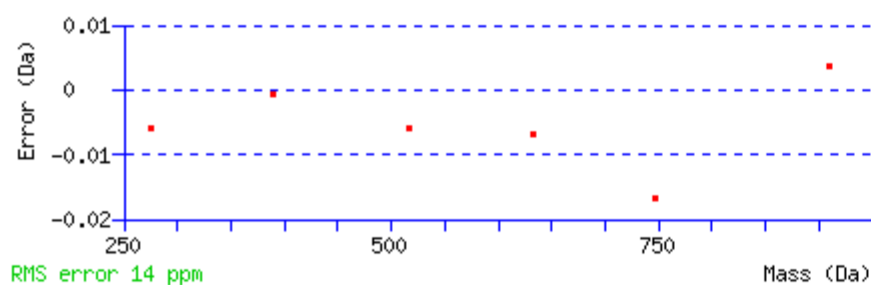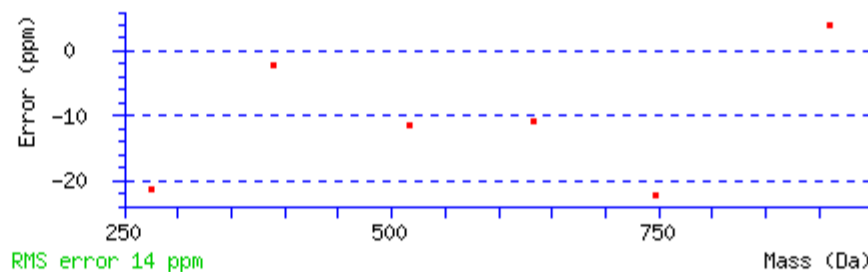

NCBI BLAST search of [SEYNDQLTR](#)

(Parameters: blastp, nr protein database, expect=20000, no filter, PAM30)

Other BLAST [web gateways](#)

All matches to this query

| Score | Mr(calc):   | Delta     | Sequence                    |
|-------|-------------|-----------|-----------------------------|
| 46.9  | 1124.509796 | 0.000212  | <a href="#">SEYNDQLTR</a>   |
| 5.6   | 1124.506653 | 0.003355  | <a href="#">SCQISCKSR</a>   |
| 2.9   | 1124.513168 | -0.003160 | <a href="#">RSPSASSLSSM</a> |

Mascot: <http://www.matrixscience.com/>

# MASCOT SCIENCE Mascot Search Results

## Peptide View

MS/MS Fragmentation of **LFLIDFGLAK**

Found in **KCIAL\_HUMAN**, Casein kinase I isoform alpha-like OS=Homo sapiens GN=CSNK1A1L PE=2 SV=2

Match to Query 25273: 1135.661148 from(568.837850,2+) rtinseconds(4007) index(61097)

Title: Locus:1.1.1.1909.11

Data file 2012-01-27 - TFD - Epitel - IEC - 10ul - 1.mgf

Click mouse within plot area to zoom in by factor of two about that point

Or, Plot from  to  Da

Label all possible matches  Label matches used for scoring

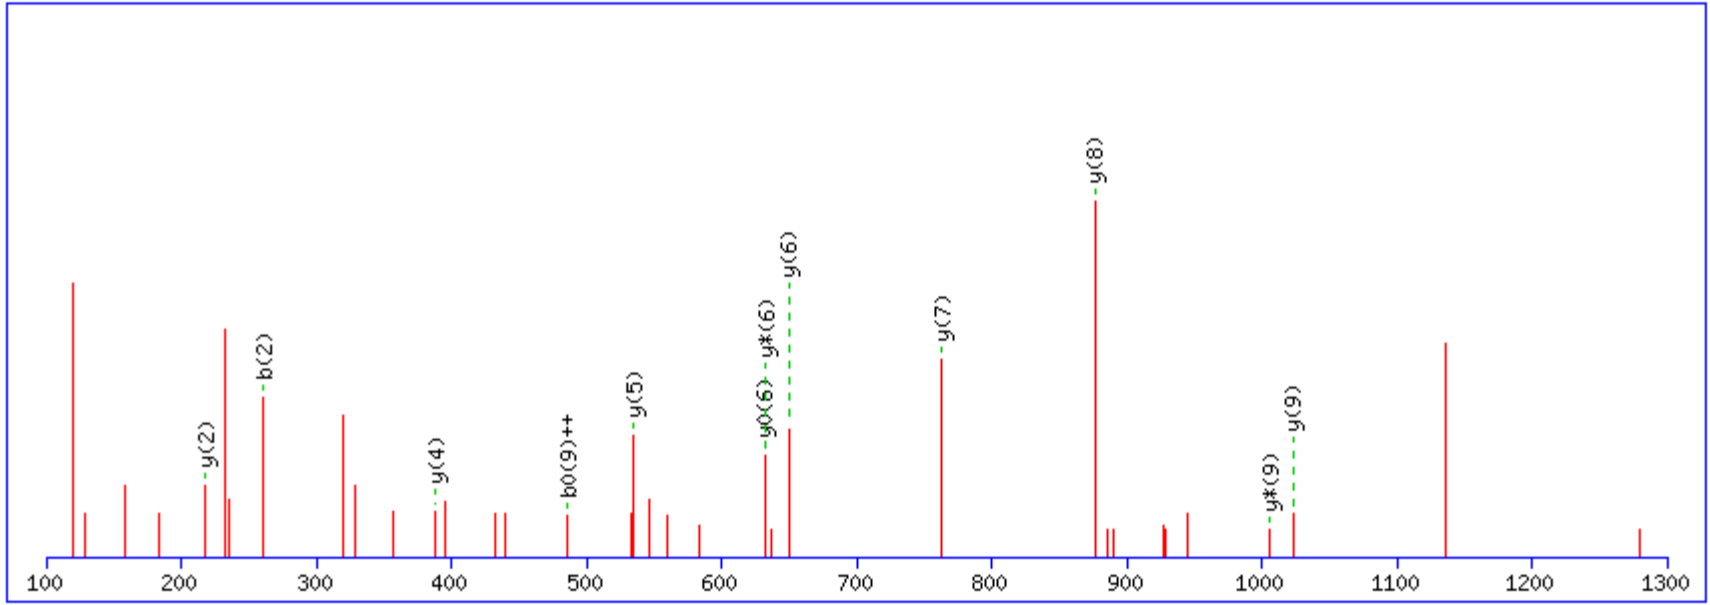

Monoisotopic mass of neutral peptide Mr(calc): 1135.664124

Fixed modifications: Carbamidomethyl (C) (apply to specified residues or termini only)

Ions Score: 31 Expect: 0.0028

Matches : 12/72 fragment ions using 32 most intense peaks [\(help\)](#)

| #  | b          | b <sup>++</sup> | b <sup>0</sup> | b <sup>0++</sup> | Seq. | y           | y <sup>++</sup> | y <sup>*</sup> | y <sup>++</sup> | y <sup>0</sup> | y <sup>0++</sup> | #  |
|----|------------|-----------------|----------------|------------------|------|-------------|-----------------|----------------|-----------------|----------------|------------------|----|
| 1  | 114.091340 | 57.549308       |                |                  | L    |             |                 |                |                 |                |                  | 10 |
| 2  | 261.159754 | 131.083515      |                |                  | F    | 1023.587345 | 512.297310      | 1006.560796    | 503.784036      | 1005.576780    | 503.292028       | 9  |
| 3  | 374.243818 | 187.625547      |                |                  | L    | 876.518931  | 438.763104      | 859.492382     | 430.249829      | 858.508366     | 429.757821       | 8  |
| 4  | 487.327882 | 244.167579      |                |                  | I    | 763.434867  | 382.221072      | 746.408318     | 373.707797      | 745.424302     | 373.215789       | 7  |
| 5  | 602.354825 | 301.681051      | 584.344260     | 292.675768       | D    | 650.350803  | 325.679040      | 633.324254     | 317.165765      | 632.340238     | 316.673757       | 6  |
| 6  | 749.423239 | 375.215258      | 731.412674     | 366.209975       | F    | 535.323860  | 268.165568      | 518.297311     | 259.652294      |                |                  | 5  |
| 7  | 806.444703 | 403.725990      | 788.434138     | 394.720707       | G    | 388.255446  | 194.631361      | 371.228897     | 186.118087      |                |                  | 4  |
| 8  | 919.528767 | 460.268022      | 901.518202     | 451.262739       | L    | 331.233982  | 166.120629      | 314.207433     | 157.607354      |                |                  | 3  |
| 9  | 990.565881 | 495.786579      | 972.555316     | 486.781296       | A    | 218.149918  | 109.578597      | 201.123369     | 101.065322      |                |                  | 2  |
| 10 |            |                 |                |                  | K    | 147.112804  | 74.060040       | 130.086255     | 65.546765       |                |                  | 1  |

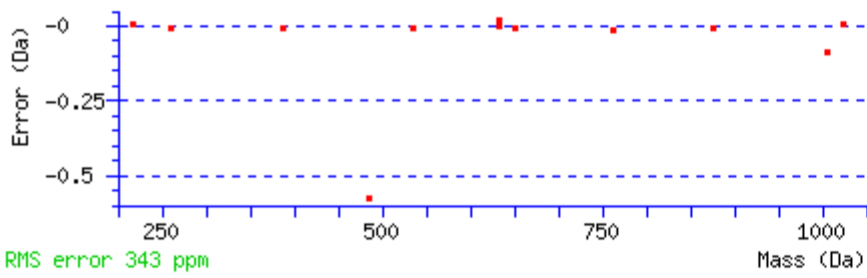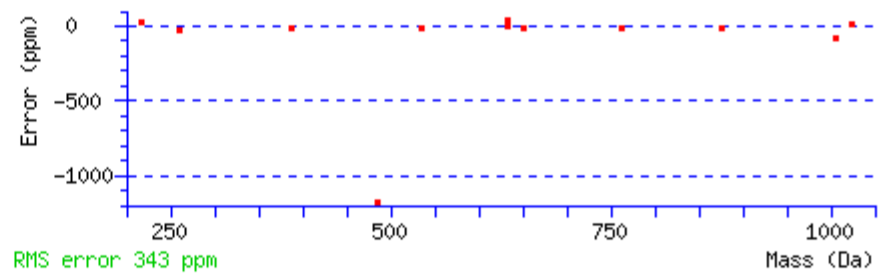

NCBI BLAST search of **LFLIDFGLAK**

(Parameters: blastp, nr protein database, expect=20000, no filter, PAM30)

Other BLAST [web gateways](#)

All matches to this query

| Score | Mr(calc):   | Delta     | Sequence                   |
|-------|-------------|-----------|----------------------------|
| 31.4  | 1135.664124 | -0.002976 | <a href="#">LFLIDFGLAK</a> |

Mascot: <http://www.matrixscience.com/>



# MASCOT SCIENCE Mascot Search Results

## Peptide View

MS/MS Fragmentation of **SSFVPSLFSK**

Found in **CASP7\_HUMAN**, Caspase-7 OS=Homo sapiens GN=CASP7 PE=1 SV=1

Match to Query 23146: 1097.584888 from(549.799720,2+) rtinseconds(3053) index(42476)

Title: Locus:1.1.1.2503.7

Data file 2011-11-10 - TFD - EP 3-4.mgf

Click mouse within plot area to zoom in by factor of two about that point

Or, Plot from  to  Da

Label all possible matches  Label matches used for scoring

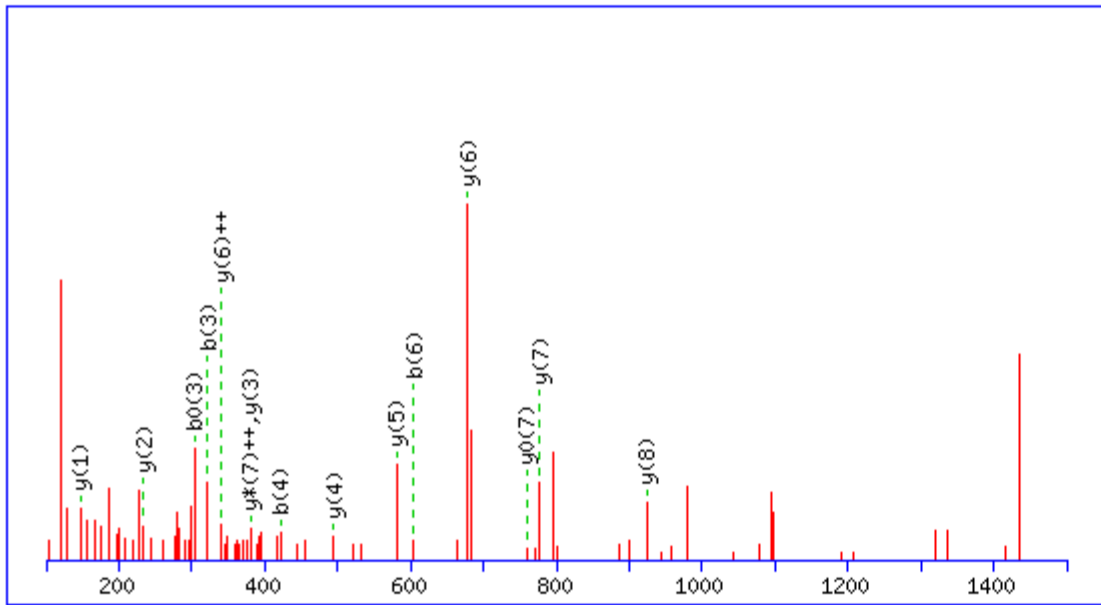

Monoisotopic mass of neutral peptide Mr(calc): 1097.575714

Fixed modifications: Propionamide (C) (apply to specified residues or termini only)

Ions Score: 43 Expect: 0.00026

Matches : 15/88 fragment ions using 37 most intense peaks [\(help\)](#)

| #  | b                 | b <sup>++</sup> | b <sup>0</sup>    | b <sup>0++</sup> | Seq. | y                 | y <sup>++</sup>   | y <sup>*</sup> | y <sup>*++</sup>  | y <sup>0</sup>    | y <sup>0++</sup> | #  |
|----|-------------------|-----------------|-------------------|------------------|------|-------------------|-------------------|----------------|-------------------|-------------------|------------------|----|
| 1  | 88.039304         | 44.523290       | 70.028739         | 35.518008        | S    |                   |                   |                |                   |                   |                  | 10 |
| 2  | 175.071332        | 88.039304       | 157.060767        | 79.034021        | S    | 1011.550958       | 506.279117        | 994.524409     | 497.765843        | 993.540393        | 497.273835       | 9  |
| 3  | <b>322.139746</b> | 161.573511      | <b>304.129181</b> | 152.568229       | F    | <b>924.518930</b> | 462.763103        | 907.492381     | 454.249829        | 906.508365        | 453.757821       | 8  |
| 4  | <b>421.208160</b> | 211.107718      | 403.197595        | 202.102436       | V    | <b>777.450516</b> | 389.228896        | 760.423967     | <b>380.715622</b> | <b>759.439951</b> | 380.223614       | 7  |
| 5  | 518.260924        | 259.634100      | 500.250359        | 250.628818       | P    | <b>678.382102</b> | <b>339.694689</b> | 661.355553     | 331.181415        | 660.371537        | 330.689407       | 6  |
| 6  | <b>605.292952</b> | 303.150114      | 587.282387        | 294.144832       | S    | <b>581.329338</b> | 291.168307        | 564.302789     | 282.655033        | 563.318773        | 282.163025       | 5  |
| 7  | 718.377016        | 359.692146      | 700.366451        | 350.686864       | L    | <b>494.297310</b> | 247.652293        | 477.270761     | 239.139019        | 476.286745        | 238.647011       | 4  |
| 8  | 865.445430        | 433.226353      | 847.434865        | 424.221071       | F    | <b>381.213246</b> | 191.110261        | 364.186697     | 182.596987        | 363.202681        | 182.104979       | 3  |
| 9  | 952.477458        | 476.742367      | 934.466893        | 467.737084       | S    | <b>234.144832</b> | 117.576054        | 217.118283     | 109.062780        | 216.134267        | 108.570772       | 2  |
| 10 |                   |                 |                   |                  | K    | <b>147.112804</b> | 74.060040         | 130.086255     | 65.546766         |                   |                  | 1  |

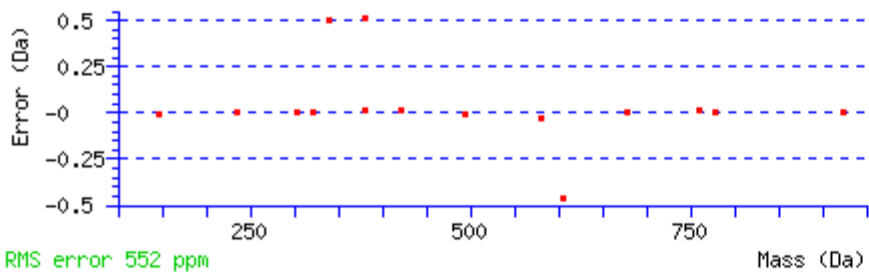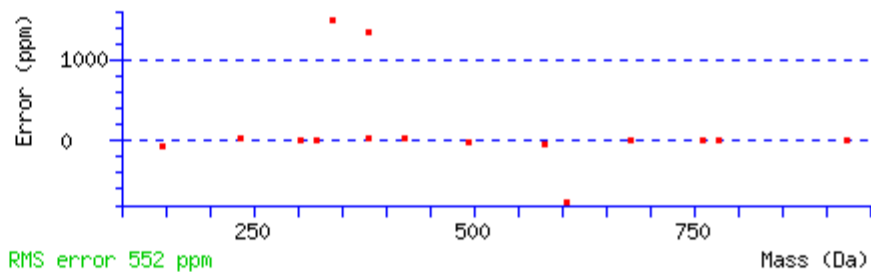

NCBI BLAST search of [SSFVPSLFSK](#)

(Parameters: blastp, nr protein database, expect=20000, no filter, PAM30)

Other BLAST [web gateways](#)

## All matches to this query

| Score | Mr(calc):   | Delta     | Sequence                   |
|-------|-------------|-----------|----------------------------|
| 42.8  | 1097.575714 | 0.009174  | <a href="#">SSFVPSLFSK</a> |
| 4.3   | 1097.582901 | 0.001987  | <a href="#">REIPPGIER</a>  |
| 0.3   | 1097.590332 | -0.005444 | <a href="#">KFTVTVMR</a>   |

Mascot: <http://www.matrixscience.com/>

**Peptide View**

MS/MS Fragmentation of **LPASFDAR**

Found in **CATB\_HUMAN**, Cathepsin B OS=Homo sapiens GN=CTSB PE=1 SV=3

Match to Query 4766: 875.448848 from(438.731700,2+) rtinseconds(1610) index(15744)

Title: Locus:1.1.1.1002.7

Data file 2012-01-27 - TFD - Epitel - IEC - 10ul - 1.mgf

Click mouse within plot area to zoom in by factor of two about that point

Or, Plot from  to  Da

Label all possible matches  Label matches used for scoring

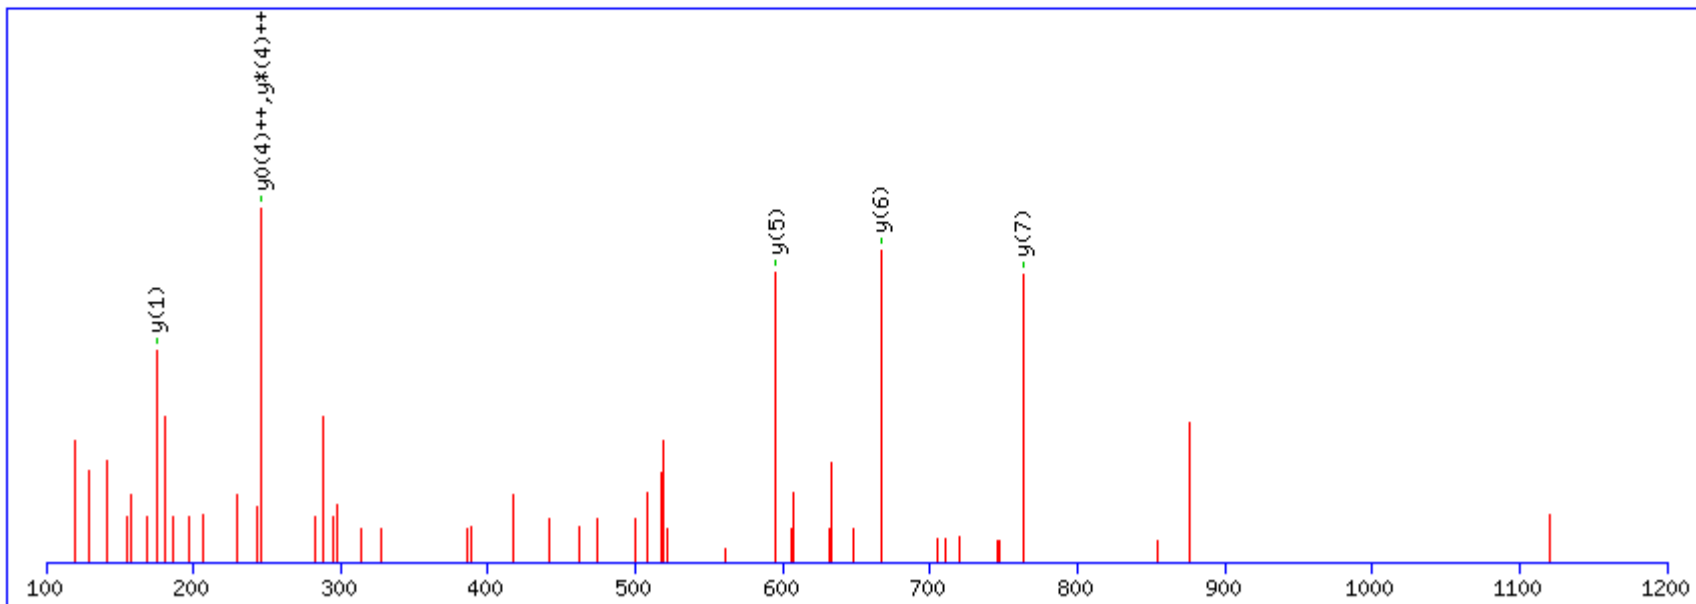

Monoisotopic mass of neutral peptide Mr(calc): 875.450104

Fixed modifications: Carbamidomethyl (C) (apply to specified residues or termini only)

Ions Score: 39 Expect: 0.003

Matches : 7/60 fragment ions using 8 most intense peaks [\(help\)](#)

| # | b          | b <sup>++</sup> | b <sup>0</sup> | b <sup>0++</sup> | Seq. | y          | y <sup>++</sup> | y <sup>*</sup> | y <sup>*++</sup> | y <sup>0</sup> | y <sup>0++</sup> | # |
|---|------------|-----------------|----------------|------------------|------|------------|-----------------|----------------|------------------|----------------|------------------|---|
| 1 | 114.091340 | 57.549308       |                |                  | L    |            |                 |                |                  |                |                  | 8 |
| 2 | 211.144104 | 106.075690      |                |                  | P    | 763.373329 | 382.190302      | 746.346780     | 373.677028       | 745.362764     | 373.185020       | 7 |
| 3 | 282.181218 | 141.594247      |                |                  | A    | 666.320565 | 333.663921      | 649.294016     | 325.150646       | 648.310000     | 324.658638       | 6 |
| 4 | 369.213246 | 185.110261      | 351.202681     | 176.104978       | S    | 595.283451 | 298.145363      | 578.256902     | 289.632089       | 577.272886     | 289.140081       | 5 |
| 5 | 516.281660 | 258.644468      | 498.271095     | 249.639186       | F    | 508.251423 | 254.629349      | 491.224874     | 246.116075       | 490.240858     | 245.624067       | 4 |
| 6 | 631.308603 | 316.157940      | 613.298038     | 307.152657       | D    | 361.183009 | 181.095142      | 344.156460     | 172.581868       | 343.172444     | 172.089860       | 3 |
| 7 | 702.345717 | 351.676496      | 684.335152     | 342.671214       | A    | 246.156066 | 123.581671      | 229.129517     | 115.068396       |                |                  | 2 |
| 8 |            |                 |                |                  | R    | 175.118952 | 88.063114       | 158.092403     | 79.549839        |                |                  | 1 |

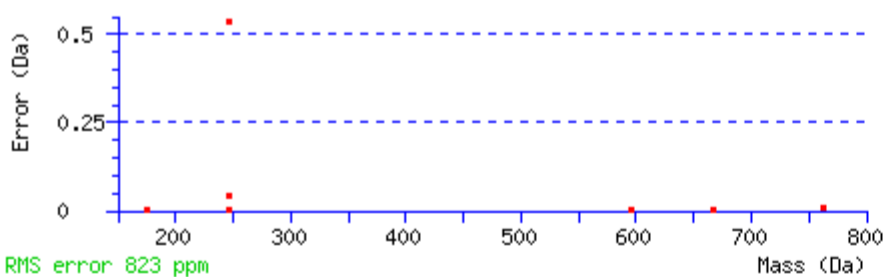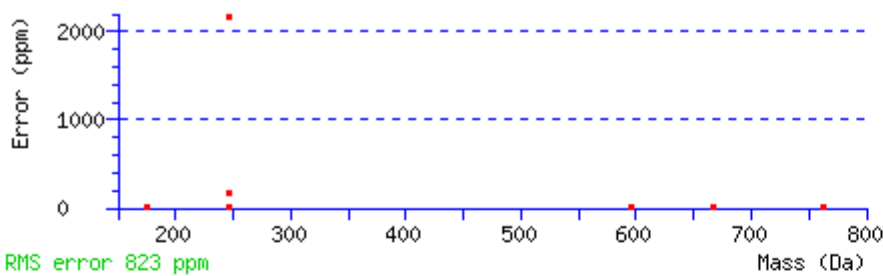

NCBI **BLAST** search of **LPASFDAR**

(Parameters: blastp, nr protein database, expect=20000, no filter, PAM30)

Other BLAST [web gateways](#)

**All matches to this query**

| Score | Mr(calc):  | Delta     | Sequence                  |
|-------|------------|-----------|---------------------------|
| 38.8  | 875.450104 | -0.001256 | <a href="#">LPASFDAR</a>  |
| 22.6  | 875.450119 | -0.001271 | <a href="#">IPFSPGSR</a>  |
| 11.2  | 875.453461 | -0.004613 | <a href="#">LSMQELR</a>   |
| 8.9   | 875.453461 | -0.004613 | <a href="#">IMAQIER</a>   |
| 8.4   | 875.450119 | -0.001271 | <a href="#">IPNFDVR</a>   |
| 7.0   | 875.453461 | -0.004613 | <a href="#">EIQMLAR</a>   |
| 6.8   | 875.453476 | -0.004628 | <a href="#">EVMGALTR</a>  |
| 6.5   | 875.457321 | -0.008473 | <a href="#">RAGTTGSAR</a> |
| 5.8   | 875.442261 | 0.006587  | <a href="#">IPTGQLTM</a>  |
| 5.8   | 875.442230 | 0.006618  | <a href="#">LPSAETMK</a>  |

# MASCOT SEARCH RESULTS

## Peptide View

MS/MS Fragmentation of **VGDYGSLSGR**

Found in **CATZ\_HUMAN**, Cathepsin Z OS=Homo sapiens GN=CTSZ PE=1 SV=1

Match to Query 16715: 1009.474568 from(505.744560,2+) rtinseconds(1514) index(13814)

Title: Locus:1.1.1.1876.24

Data file 2011-11-12 - TFD - EP 6-4.mgf

Click mouse within plot area to zoom in by factor of two about that point

Or, Plot from  to  Da

Label all possible matches  Label matches used for scoring

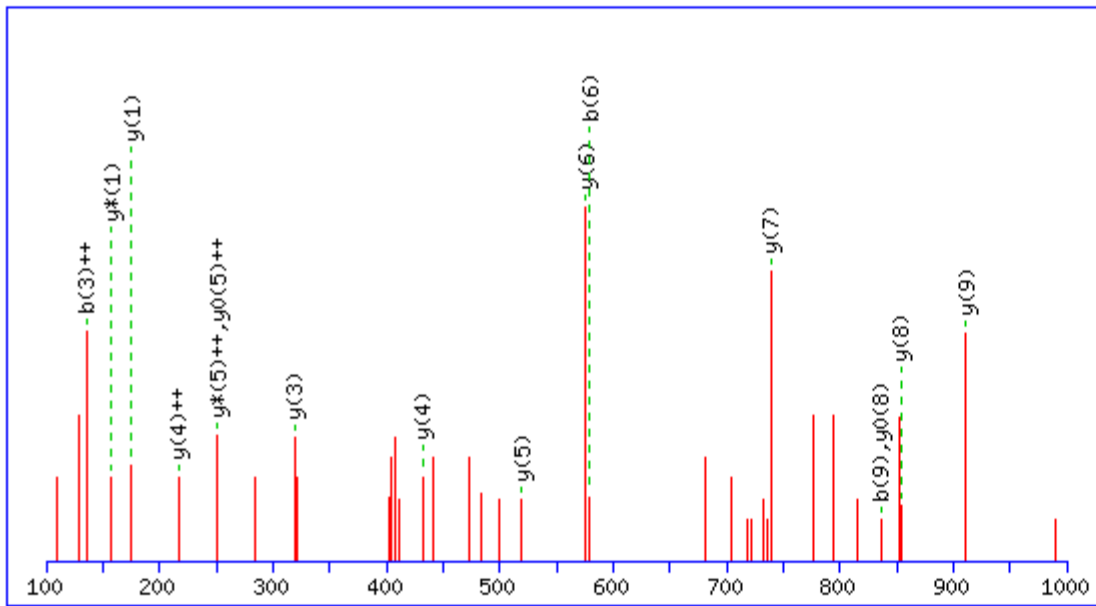

Monoisotopic mass of neutral peptide Mr(calc): 1009.482880

Fixed modifications: Propionamide (C) (apply to specified residues or termini only)

Ions Score: 48 Expect: 0.00013

Matches : 16/82 fragment ions using 30 most intense peaks [\(help\)](#)

| #  | b                 | b <sup>++</sup>   | b <sup>0</sup> | b <sup>0++</sup> | Seq. | y                 | y <sup>++</sup>   | y <sup>*</sup>    | y <sup>++</sup>   | y <sup>0</sup>    | y <sup>0++</sup>  | #  |
|----|-------------------|-------------------|----------------|------------------|------|-------------------|-------------------|-------------------|-------------------|-------------------|-------------------|----|
| 1  | 100.075690        | 50.541483         |                |                  | V    |                   |                   |                   |                   |                   |                   | 10 |
| 2  | 157.097154        | 79.052215         |                |                  | G    | <b>911.421736</b> | 456.214506        | 894.395187        | 447.701232        | 893.411171        | 447.209224        | 9  |
| 3  | 272.124097        | <b>136.565687</b> | 254.113532     | 127.560404       | D    | <b>854.400272</b> | 427.703774        | 837.373723        | 419.190500        | <b>836.389707</b> | 418.698492        | 8  |
| 4  | 435.187426        | 218.097351        | 417.176861     | 209.092069       | Y    | <b>739.373329</b> | 370.190303        | 722.346780        | 361.677028        | 721.362764        | 361.185020        | 7  |
| 5  | 492.208890        | 246.608083        | 474.198325     | 237.602801       | G    | <b>576.310000</b> | 288.658638        | 559.283451        | 280.145364        | 558.299435        | 279.653356        | 6  |
| 6  | <b>579.240918</b> | 290.124097        | 561.230353     | 281.118815       | S    | <b>519.288536</b> | 260.147906        | 502.261987        | <b>251.634632</b> | 501.277971        | <b>251.142624</b> | 5  |
| 7  | 692.324982        | 346.666129        | 674.314417     | 337.660847       | L    | <b>432.256508</b> | <b>216.631892</b> | 415.229959        | 208.118617        | 414.245943        | 207.626609        | 4  |
| 8  | 779.357010        | 390.182143        | 761.346445     | 381.176861       | S    | <b>319.172444</b> | 160.089860        | 302.145895        | 151.576585        | 301.161879        | 151.084577        | 3  |
| 9  | <b>836.378474</b> | 418.692875        | 818.367909     | 409.687593       | G    | 232.140416        | 116.573846        | 215.113867        | 108.060571        |                   |                   | 2  |
| 10 |                   |                   |                |                  | R    | <b>175.118952</b> | 88.063114         | <b>158.092403</b> | 79.549839         |                   |                   | 1  |

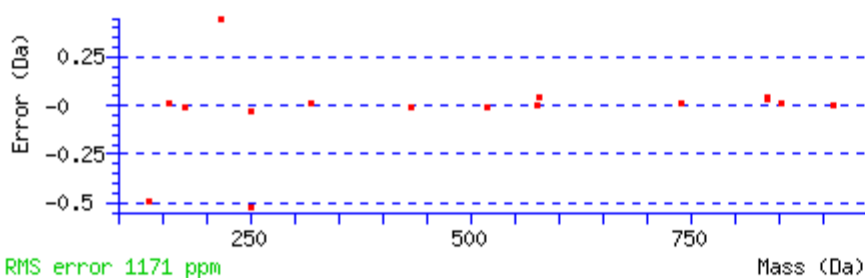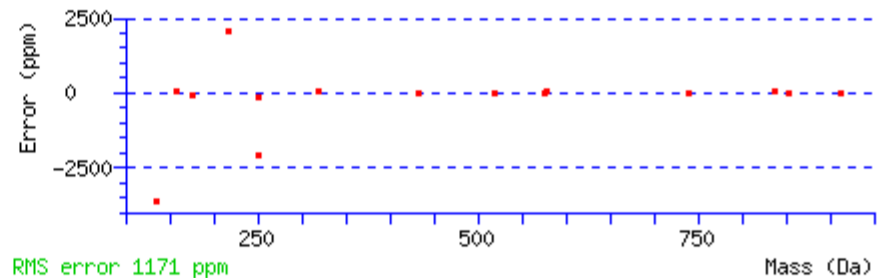

NCBI BLAST search of **VGDYGSLSGR**

(Parameters: blastp, nr protein database, expect=20000, no filter, PAM30)

Other BLAST [web gateways](#)

All matches to this query

| Score | Mr(calc):   | Delta     | Sequence                   |
|-------|-------------|-----------|----------------------------|
| 47.7  | 1009.482880 | -0.008312 | <a href="#">VGDYGSLSGR</a> |

Mascot: <http://www.matrixscience.com/>

**Peptide View**

MS/MS Fragmentation of **LRSLPSPQR**

Found in **CTSRG\_HUMAN**, Cation channel sperm-associated protein subunit gamma OS=Homo sapiens GN=CATSPERG PE=2 SV=3

Match to Query 21031: 1068.597368 from(535.305960,2+) rtinseconds(1990) index(22393)

Title: Locus:1.1.1.2101.24

Data file 2011-11-10 - TFD - EP 3-4.mgf

Click mouse within plot area to zoom in by factor of two about that point

Or, Plot from  to  Da

Label all possible matches  Label matches used for scoring

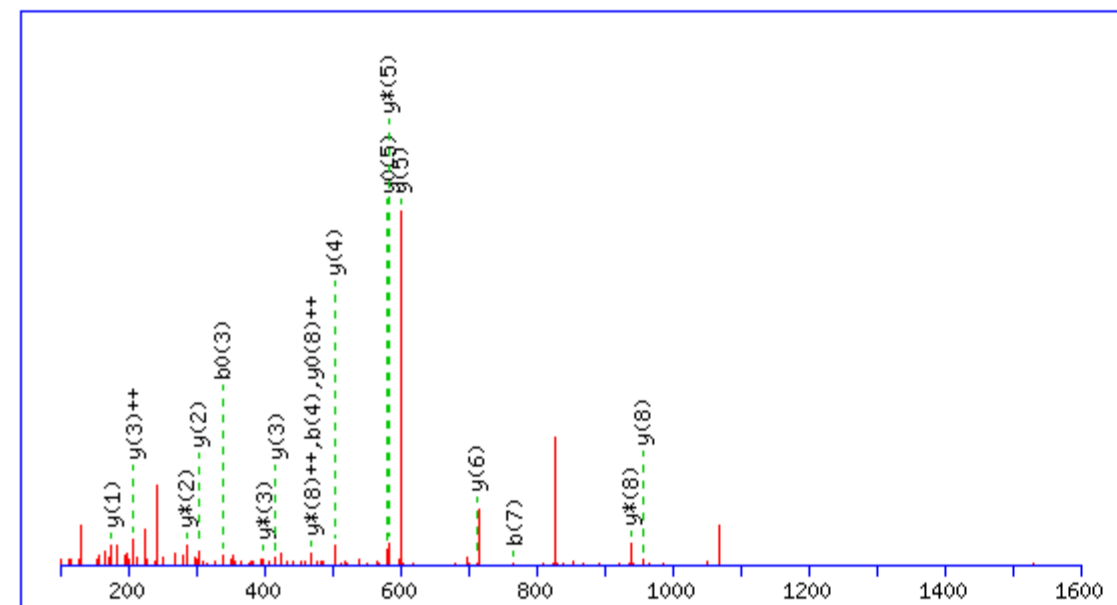

Monoisotopic mass of neutral peptide Mr(calc): 1068.603973

Fixed modifications: Propionamide (C) (apply to specified residues or termini only)

Variable modifications:

P7 : Oxidation (P)

Ions Score: 36 Expect: 0.0023

Matches : 18/84 fragment ions using 37 most intense peaks [\(help\)](#)

| # | b                 | b <sup>++</sup> | b <sup>*</sup> | b <sup>*++</sup> | b <sup>0</sup>    | b <sup>0++</sup> | Seq. | y                 | y <sup>++</sup>   | y <sup>*</sup>    | y <sup>*++</sup>  | y <sup>0</sup>    | y <sup>0++</sup>  | # |
|---|-------------------|-----------------|----------------|------------------|-------------------|------------------|------|-------------------|-------------------|-------------------|-------------------|-------------------|-------------------|---|
| 1 | 114.091340        | 57.549308       |                |                  |                   |                  | L    |                   |                   |                   |                   |                   |                   | 9 |
| 2 | 270.192451        | 135.599864      | 253.165902     | 127.086589       |                   |                  | R    | <b>956.527204</b> | 478.767240        | <b>939.500655</b> | <b>470.253966</b> | 938.516639        | <b>469.761958</b> | 8 |
| 3 | 357.224479        | 179.115878      | 340.197930     | 170.602603       | <b>339.213914</b> | 170.110595       | S    | 800.426093        | 400.716685        | 783.399544        | 392.203410        | 782.415528        | 391.711402        | 7 |
| 4 | <b>470.308543</b> | 235.657910      | 453.281994     | 227.144635       | 452.297978        | 226.652627       | L    | <b>713.394065</b> | 357.200671        | 696.367516        | 348.687396        | 695.383500        | 348.195388        | 6 |
| 5 | 567.361307        | 284.184292      | 550.334758     | 275.671017       | 549.350742        | 275.179009       | P    | <b>600.310001</b> | 300.658639        | <b>583.283452</b> | 292.145364        | <b>582.299436</b> | 291.653356        | 5 |
| 6 | 654.393335        | 327.700306      | 637.366786     | 319.187031       | 636.382770        | 318.695023       | S    | <b>503.257237</b> | 252.132256        | 486.230688        | 243.618982        | 485.246672        | 243.126974        | 4 |
| 7 | <b>767.441014</b> | 384.224145      | 750.414465     | 375.710871       | 749.430449        | 375.218863       | P    | <b>416.225209</b> | <b>208.616242</b> | <b>399.198660</b> | 200.102968        |                   |                   | 3 |
| 8 | 895.499592        | 448.253434      | 878.473043     | 439.740160       | 877.489027        | 439.248152       | Q    | <b>303.177530</b> | 152.092403        | <b>286.150981</b> | 143.579128        |                   |                   | 2 |
| 9 |                   |                 |                |                  |                   |                  | R    | <b>175.118952</b> | 88.063114         | 158.092403        | 79.549839         |                   |                   | 1 |

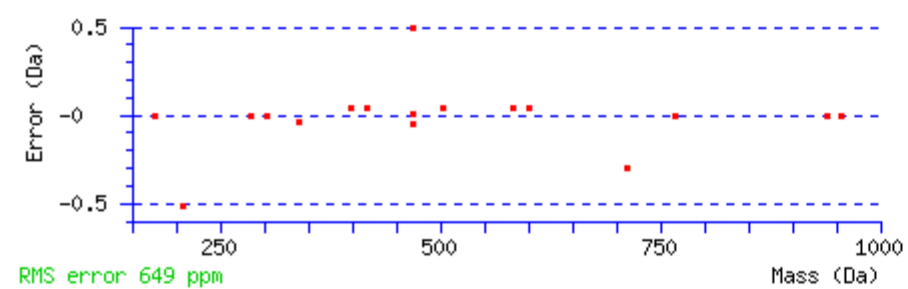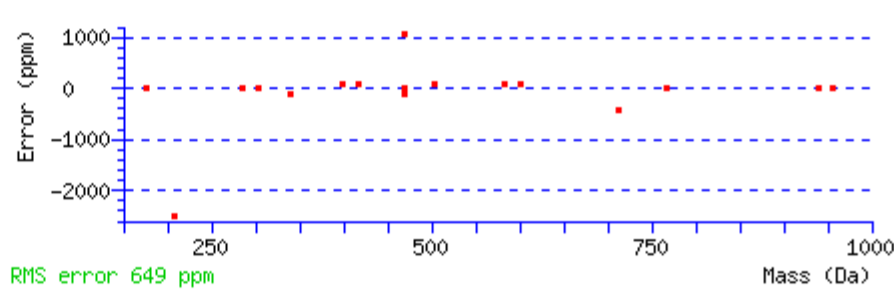

NCBI BLAST search of [LRSLPSPQR](#)

(Parameters: blastp, nr protein database, expect=20000, no filter, PAM30)

Other BLAST [web gateways](#)

**All matches to this query**

| Score | Mr(calc):   | Delta     | Sequence                   |
|-------|-------------|-----------|----------------------------|
| 35.6  | 1068.603973 | -0.006605 | <a href="#">LRSLPSPQR</a>  |
| 19.9  | 1068.603973 | -0.006605 | <a href="#">LRSLPSPQR</a>  |
| 14.1  | 1068.592743 | 0.004625  | <a href="#">AATENIPVVR</a> |
| 13.6  | 1068.603973 | -0.006605 | <a href="#">SPGLPIRSAR</a> |
| 12.2  | 1068.592728 | 0.004640  | <a href="#">LKPLGEQER</a>  |
| 11.6  | 1068.603989 | -0.006621 | <a href="#">KPPPLTRGR</a>  |
| 9.3   | 1068.603989 | -0.006621 | <a href="#">SPGPIVSRTR</a> |
| 9.2   | 1068.592743 | 0.004625  | <a href="#">SVPADLSRPK</a> |
| 8.7   | 1068.608002 | -0.010634 | <a href="#">LISRIPSFH</a>  |
| 8.0   | 1068.603958 | -0.006590 | <a href="#">IRISAPQER</a>  |

# MASCOT SCIENCE Mascot Search Results

## Peptide View

MS/MS Fragmentation of **TCDLVGEK**

Found in **MPRD\_HUMAN**, Cation-dependent mannose-6-phosphate receptor OS=Homo sapiens GN=M6PR PE=1 SV=1

Match to Query 154718: 920.435668 from(461.225110,2+) rtinseconds(1092) index(330372)

Title: Locus:1.1.1.749.14

Data file C:\Program Files (x86)\Matrix Science\Mascot Daemon\mgf3 TFD - Epitel - R2\mascot\_daemon\_merge.mgf

Click mouse within plot area to zoom in by factor of two about that point

Or, Plot from  to  Da

Label all possible matches  Label matches used for scoring

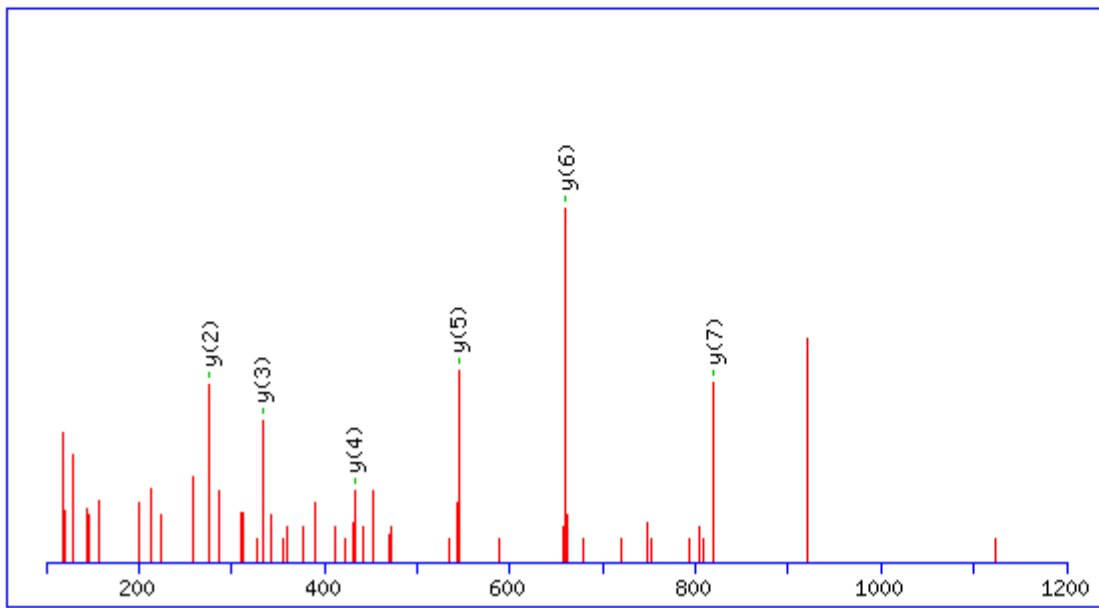

Monoisotopic mass of neutral peptide Mr(calc): 920.427338

Fixed modifications: Carbamidomethyl (C) (apply to specified residues or termini only)

Ions Score: 53 Expect: 6.9e-005

Matches : 6/68 fragment ions using 8 most intense peaks [\(help\)](#)

| # | b          | b <sup>++</sup> | b <sup>0</sup> | b <sup>0++</sup> | Seq. | y          | y <sup>++</sup> | y <sup>*</sup> | y <sup>*++</sup> | y <sup>0</sup> | y <sup>0++</sup> | # |
|---|------------|-----------------|----------------|------------------|------|------------|-----------------|----------------|------------------|----------------|------------------|---|
| 1 | 102.054955 | 51.531116       | 84.044390      | 42.525833        | T    |            |                 |                |                  |                |                  | 8 |
| 2 | 262.085604 | 131.546440      | 244.075039     | 122.541158       | C    | 820.386931 | 410.697104      | 803.360382     | 402.183829       | 802.376366     | 401.691821       | 7 |
| 3 | 377.112547 | 189.059912      | 359.101982     | 180.054629       | D    | 660.356282 | 330.681779      | 643.329733     | 322.168505       | 642.345717     | 321.676497       | 6 |
| 4 | 490.196611 | 245.601944      | 472.186046     | 236.596661       | L    | 545.329339 | 273.168308      | 528.302790     | 264.655033       | 527.318774     | 264.163025       | 5 |
| 5 | 589.265025 | 295.136151      | 571.254460     | 286.130868       | V    | 432.245275 | 216.626275      | 415.218726     | 208.113001       | 414.234710     | 207.620993       | 4 |
| 6 | 646.286489 | 323.646883      | 628.275924     | 314.641600       | G    | 333.176861 | 167.092069      | 316.150312     | 158.578794       | 315.166296     | 158.086786       | 3 |
| 7 | 775.329082 | 388.168179      | 757.318517     | 379.162897       | E    | 276.155397 | 138.581336      | 259.128848     | 130.068062       | 258.144832     | 129.576054       | 2 |
| 8 |            |                 |                |                  | K    | 147.112804 | 74.060040       | 130.086255     | 65.546765        |                |                  | 1 |

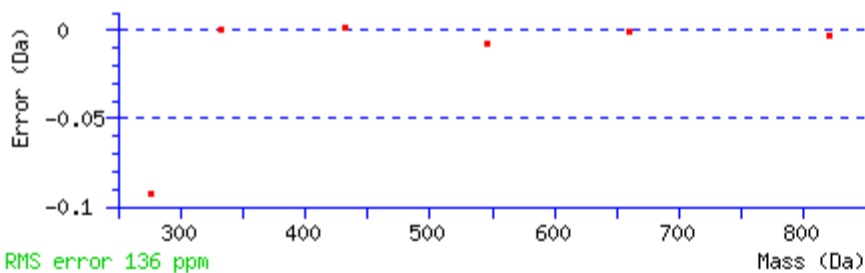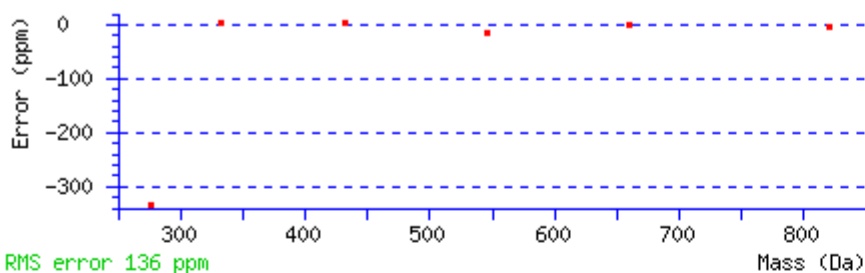

NCBI BLAST search of [TCDLVGEK](#)

(Parameters: blastp, nr protein database, expect=20000, no filter, PAM30)

Other BLAST [web gateways](#)

## All matches to this query

| Score | Mr(calc):  | Delta     | Sequence                 |
|-------|------------|-----------|--------------------------|
| 53.3  | 920.427338 | 0.008330  | <a href="#">TCDLVGEK</a> |
| 8.4   | 920.438553 | -0.002885 | <a href="#">NGIMDISR</a> |
| 8.4   | 920.435196 | 0.000472  | <a href="#">NPGFDLSR</a> |
| 8.3   | 920.427307 | 0.008361  | <a href="#">QKIGEEAM</a> |
| 8.3   | 920.427322 | 0.008346  | <a href="#">QQDLSIAM</a> |
| 7.0   | 920.438553 | -0.002885 | <a href="#">QELGTAMR</a> |
| 6.3   | 920.435181 | 0.000487  | <a href="#">YPQSSPSR</a> |
| 6.1   | 920.438568 | -0.002900 | <a href="#">QVSTMPSR</a> |
| 5.5   | 920.438553 | -0.002885 | <a href="#">STSLNPMR</a> |
| 5.5   | 920.438553 | -0.002885 | <a href="#">STSLNPMR</a> |

# **MATRIX** SCIENCE Mascot Search Results

## Peptide View

MS/MS Fragmentation of **YVDSEGHLYTVPIR**

Found in **CAV1\_HUMAN**, Caveolin-1 OS=Homo sapiens GN=CAV1 PE=1 SV=4

Match to Query 49308: 1647.823842 from(550.281890,3+) rtinseconds(2250) index(26094)

Title: Locus:1.1.1.2148.32

Data file 2011-11-12 - TFD - EP 6-5.mgf

Click mouse within plot area to zoom in by factor of two about that point

Or, Plot from  to  Da

Label all possible matches  Label matches used for scoring

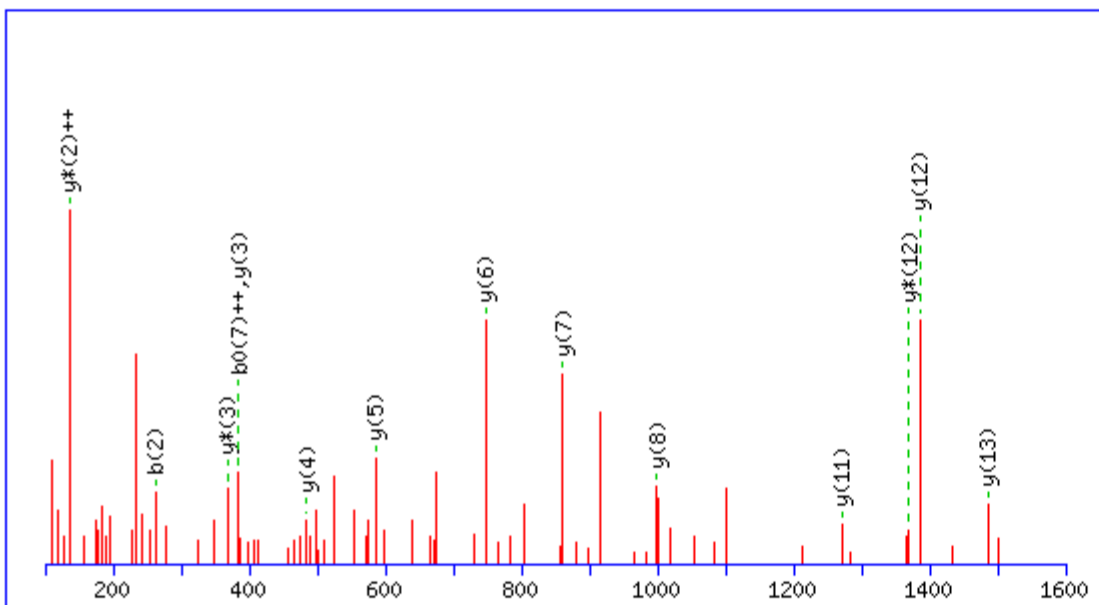

Monoisotopic mass of neutral peptide Mr(calc): 1647.825668

Fixed modifications: Propionamide (C) (apply to specified residues or termini only)

Ions Score: 52 Expect: 9.2e-005

Matches : 14/118 fragment ions using 26 most intense peaks [\(help\)](#)

| #  | b           | b <sup>++</sup> | b <sup>0</sup> | b <sup>0++</sup> | Seq. | y           | y <sup>++</sup> | y <sup>*</sup> | y <sup>+++</sup> | y <sup>0</sup> | y <sup>0++</sup> | #  |
|----|-------------|-----------------|----------------|------------------|------|-------------|-----------------|----------------|------------------|----------------|------------------|----|
| 1  | 164.070605  | 82.538940       |                |                  | Y    |             |                 |                |                  |                |                  | 14 |
| 2  | 263.139019  | 132.073148      |                |                  | V    | 1485.769620 | 743.388448      | 1468.743071    | 734.875174       | 1467.759055    | 734.383166       | 13 |
| 3  | 378.165962  | 189.586619      | 360.155397     | 180.581337       | D    | 1386.701206 | 693.854241      | 1369.674657    | 685.340967       | 1368.690641    | 684.848958       | 12 |
| 4  | 465.197990  | 233.102633      | 447.187425     | 224.097351       | S    | 1271.674263 | 636.340770      | 1254.647714    | 627.827495       | 1253.663698    | 627.335487       | 11 |
| 5  | 594.240583  | 297.623930      | 576.230018     | 288.618647       | E    | 1184.642235 | 592.824756      | 1167.615686    | 584.311481       | 1166.631670    | 583.819473       | 10 |
| 6  | 651.262047  | 326.134662      | 633.251482     | 317.129379       | G    | 1055.599642 | 528.303459      | 1038.573093    | 519.790185       | 1037.589077    | 519.298176       | 9  |
| 7  | 788.320959  | 394.664118      | 770.310394     | 385.658835       | H    | 998.578178  | 499.792727      | 981.551629     | 491.279452       | 980.567613     | 490.787444       | 8  |
| 8  | 901.405023  | 451.206150      | 883.394458     | 442.200867       | L    | 861.519266  | 431.263271      | 844.492717     | 422.749997       | 843.508701     | 422.257989       | 7  |
| 9  | 1064.468352 | 532.737814      | 1046.457787    | 523.732532       | Y    | 748.435202  | 374.721239      | 731.408653     | 366.207965       | 730.424637     | 365.715957       | 6  |
| 10 | 1165.516031 | 583.261654      | 1147.505466    | 574.256371       | T    | 585.371873  | 293.189575      | 568.345324     | 284.676300       | 567.361308     | 284.184292       | 5  |
| 11 | 1264.584445 | 632.795861      | 1246.573880    | 623.790578       | V    | 484.324194  | 242.665735      | 467.297645     | 234.152460       |                |                  | 4  |
| 12 | 1361.637209 | 681.322243      | 1343.626644    | 672.316960       | P    | 385.255780  | 193.131528      | 368.229231     | 184.618253       |                |                  | 3  |
| 13 | 1474.721273 | 737.864275      | 1456.710708    | 728.858992       | I    | 288.203016  | 144.605146      | 271.176467     | 136.091871       |                |                  | 2  |
| 14 |             |                 |                |                  | R    | 175.118952  | 88.063114       | 158.092403     | 79.549839        |                |                  | 1  |

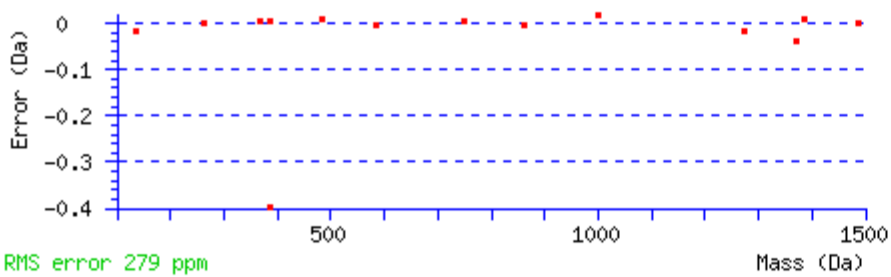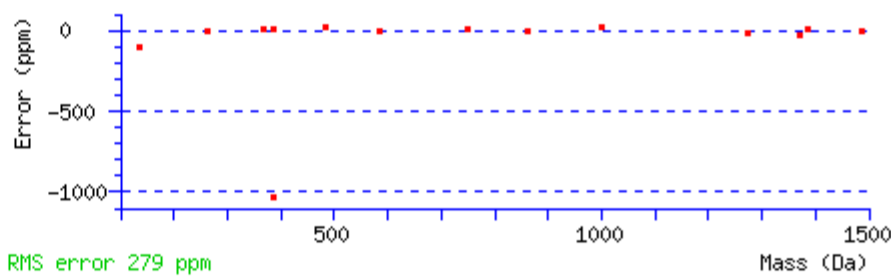

NCBI BLAST search of [YVDSEGHLYTVPIR](#)

(Parameters: blastp, nr protein database, expect=20000, no filter, PAM30)

Other BLAST [web gateways](#)

## All matches to this query

| Score | Mr(calc):   | Delta     | Sequence                           |
|-------|-------------|-----------|------------------------------------|
| 52.3  | 1647.825668 | -0.001826 | <a href="#">YVDSEGHLYTVPIR</a>     |
| 15.3  | 1647.832855 | -0.009013 | <a href="#">LEQEAGARQPPPAPR</a>    |
| 11.3  | 1647.832855 | -0.009013 | <a href="#">LEQEAGARQPPPAPR</a>    |
| 10.3  | 1647.832855 | -0.009013 | <a href="#">LEQEAGARQPPPAPR</a>    |
| 8.2   | 1647.832855 | -0.009013 | <a href="#">LEQEAGARQPPPAPR</a>    |
| 3.5   | 1647.829086 | -0.005244 | <a href="#">DGVVTIGCVGFPNVGK</a>   |
| 2.8   | 1647.832855 | -0.009013 | <a href="#">LEQEAGARQPPPAPR</a>    |
| 0.8   | 1647.821640 | 0.002202  | <a href="#">APDPVAAETA AQGPTPR</a> |

# MASCOT SCIENCE Mascot Search Results

## Peptide View

MS/MS Fragmentation of **TSSEASVSSSVAK**

Found in **CARF\_HUMAN**, CDKN2A-interacting protein OS=Homo sapiens GN=CDKN2AIP PE=1 SV=3

Match to Query 568086: 1238.598568 from(620.306560,2+) rtinseconds(1078) index(159353)

Title: Locus:1.1.1.1095.16

Data file C:\Program Files (x86)\Matrix Science\Mascot Daemon\mgf3 TFD - Epitel - R2\mascot\_daemon\_merge.mgf

Click mouse within plot area to zoom in by factor of two about that point

Or, Plot from  to  Da

Label all possible matches  Label matches used for scoring

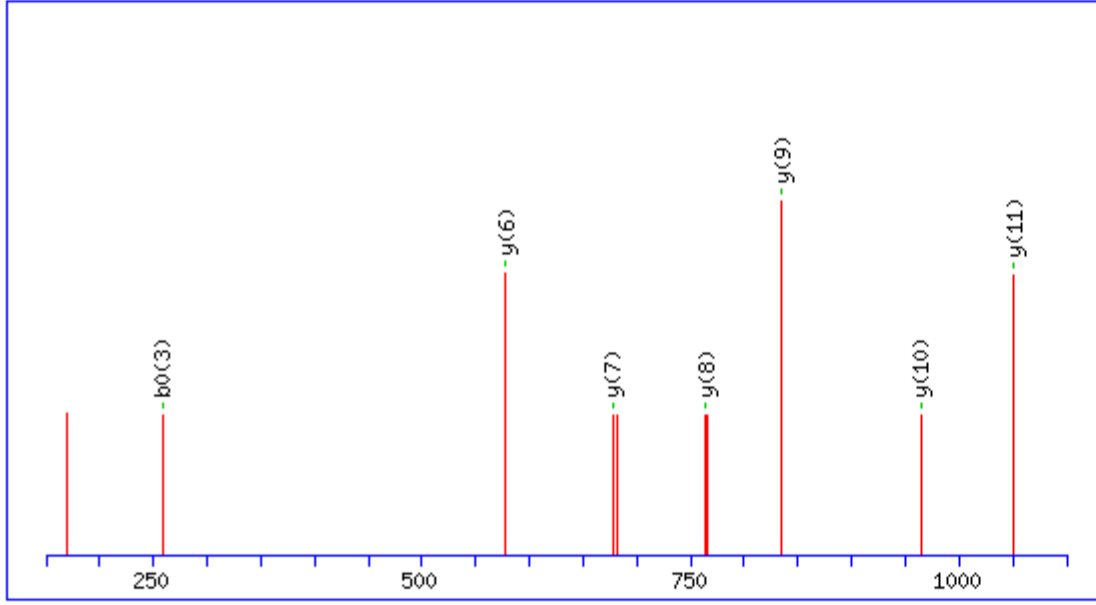

Monoisotopic mass of neutral peptide Mr(calc): 1238.599014

Fixed modifications: Carbamidomethyl (C) (apply to specified residues or termini only)

Ions Score: 46 Expect: 0.00027

Matches : 7/114 fragment ions using 9 most intense peaks ([help](#))

| #  | b           | b <sup>++</sup> | b <sup>0</sup>    | b <sup>0++</sup> | Seq. | y                  | y <sup>++</sup> | y <sup>*</sup> | y <sup>*++</sup> | y <sup>0</sup> | y <sup>0++</sup> | #  |
|----|-------------|-----------------|-------------------|------------------|------|--------------------|-----------------|----------------|------------------|----------------|------------------|----|
| 1  | 102.054955  | 51.531116       | 84.044390         | 42.525833        | T    |                    |                 |                |                  |                |                  | 13 |
| 2  | 189.086983  | 95.047129       | 171.076418        | 86.041847        | S    | 1138.558621        | 569.782948      | 1121.532072    | 561.269674       | 1120.548056    | 560.777666       | 12 |
| 3  | 276.119011  | 138.563143      | <b>258.108446</b> | 129.557861       | S    | <b>1051.526593</b> | 526.266934      | 1034.500044    | 517.753660       | 1033.516028    | 517.261652       | 11 |
| 4  | 405.161604  | 203.084440      | 387.151039        | 194.079157       | E    | <b>964.494565</b>  | 482.750921      | 947.468016     | 474.237646       | 946.484000     | 473.745638       | 10 |
| 5  | 476.198718  | 238.602997      | 458.188153        | 229.597714       | A    | <b>835.451972</b>  | 418.229624      | 818.425423     | 409.716349       | 817.441407     | 409.224341       | 9  |
| 6  | 563.230746  | 282.119011      | 545.220181        | 273.113728       | S    | <b>764.414858</b>  | 382.711067      | 747.388309     | 374.197792       | 746.404293     | 373.705784       | 8  |
| 7  | 662.299160  | 331.653218      | 644.288595        | 322.647935       | V    | <b>677.382830</b>  | 339.195053      | 660.356281     | 330.681779       | 659.372265     | 330.189771       | 7  |
| 8  | 749.331188  | 375.169232      | 731.320623        | 366.163949       | S    | <b>578.314416</b>  | 289.660846      | 561.287867     | 281.147572       | 560.303851     | 280.655564       | 6  |
| 9  | 836.363216  | 418.685246      | 818.352651        | 409.679963       | S    | 491.282388         | 246.144832      | 474.255839     | 237.631557       | 473.271823     | 237.139549       | 5  |
| 10 | 923.395244  | 462.201260      | 905.384679        | 453.195977       | S    | 404.250360         | 202.628818      | 387.223811     | 194.115544       | 386.239795     | 193.623536       | 4  |
| 11 | 1022.463658 | 511.735467      | 1004.453093       | 502.730184       | V    | 317.218332         | 159.112804      | 300.191783     | 150.599530       |                |                  | 3  |
| 12 | 1093.500772 | 547.254024      | 1075.490207       | 538.248741       | A    | 218.149918         | 109.578597      | 201.123369     | 101.065323       |                |                  | 2  |
| 13 |             |                 |                   |                  | K    | 147.112804         | 74.060040       | 130.086255     | 65.546765        |                |                  | 1  |

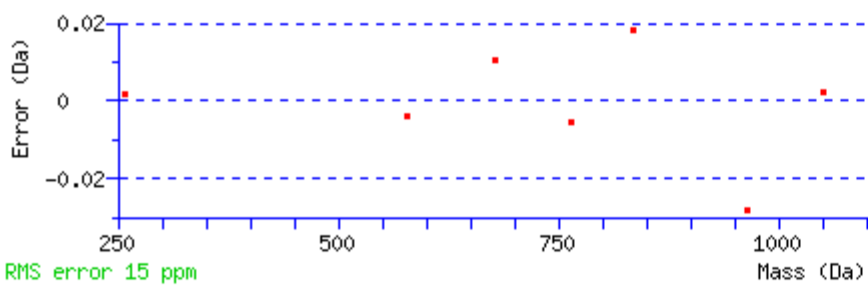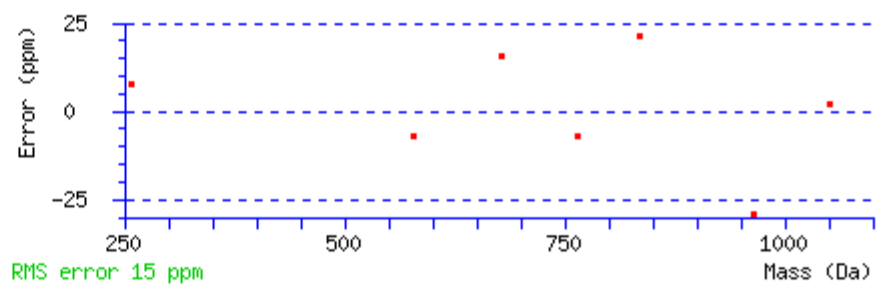

NCBI BLAST search of **TSSEASVSSSVAK**

(Parameters: blastp, nr protein database, expect=20000, no filter, PAM30)

Other BLAST [web gateways](#)

## All matches to this query

| Score | Mr(calc):   | Delta     | Sequence                      |
|-------|-------------|-----------|-------------------------------|
| 46.4  | 1238.599014 | -0.000446 | <a href="#">TSSEASVSSSVAK</a> |
| 13.7  | 1238.603043 | -0.004475 | <a href="#">APDLPPVPEEK</a>   |
| 9.4   | 1238.603012 | -0.004444 | <a href="#">EYLLGSTAEK</a>    |
| 1.6   | 1238.603043 | -0.004475 | <a href="#">APDLPPVPEEK</a>   |
| 1.6   | 1238.603043 | -0.004475 | <a href="#">APDLPPVPEEK</a>   |
| 1.6   | 1238.603043 | -0.004475 | <a href="#">APDLPPVPEEK</a>   |
| 1.6   | 1238.604370 | -0.005802 | <a href="#">EKFYDPRPR</a>     |
| 0.9   | 1238.610260 | -0.011692 | <a href="#">TSSTSSIGGISSR</a> |

Mascot: <http://www.matrixscience.com/>

# MASCOT Search Results

## Peptide View

MS/MS Fragmentation of **FGAMLDMLTDR**

Found in **CDIPT\_HUMAN**, CDP-diacylglycerol--inositol 3-phosphatidyltransferase OS=Homo sapiens GN=CDIPT PE=1 SV=1

Match to Query 41731: 1300.578448 from(651.296500,2+) rtinseconds(2451) index(29438)

Title: Locus:1.1.1.2190.42

Data file 2011-11-10 - TFD - EP 4-6.mgf

Click mouse within plot area to zoom in by factor of two about that point

Or, Plot from  to  Da

Label all possible matches  Label matches used for scoring

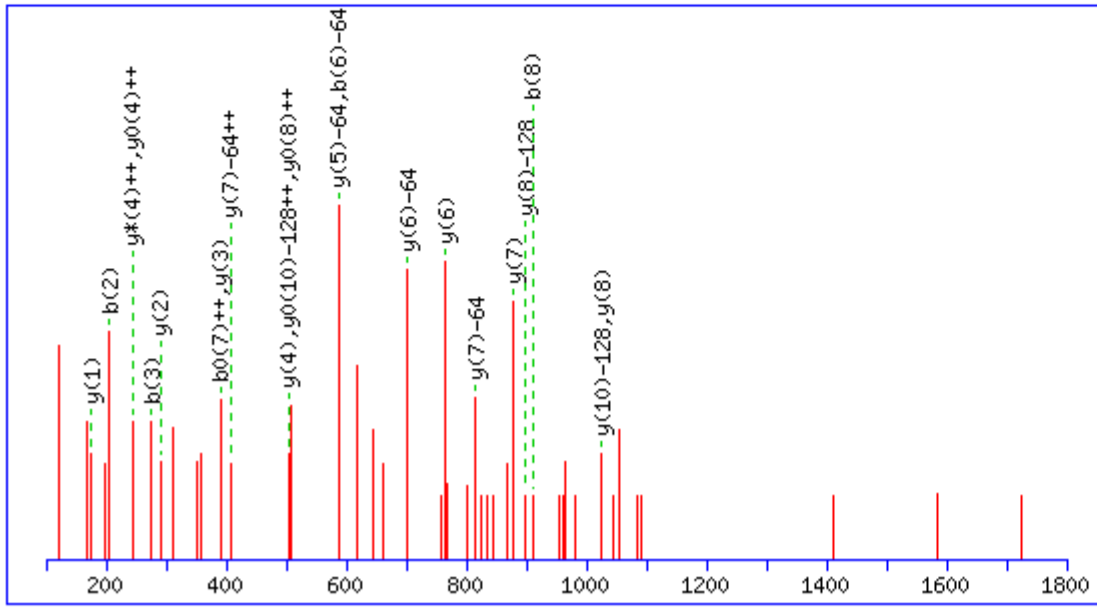

Monoisotopic mass of neutral peptide Mr(calc): 1300.579163

Fixed modifications: Propionamide (C) (apply to specified residues or termini only)

Variable modifications:

M4 : Oxidation (M), with neutral losses 63.998285 (shown in table), 0.000000

M7 : Oxidation (M), with neutral losses 63.998285 (shown in table), 0.000000

Ions Score: 40 Expect: 0.0004

Matches : 22/148 fragment ions using 43 most intense peaks [\(help\)](#)

| #  | b                 | b <sup>++</sup> | b <sup>0</sup> | b <sup>0++</sup> | Seq. | y                  | y <sup>++</sup>   | y <sup>*</sup> | y <sup>*++</sup>  | y <sup>0</sup> | y <sup>0++</sup>  | #  |
|----|-------------------|-----------------|----------------|------------------|------|--------------------|-------------------|----------------|-------------------|----------------|-------------------|----|
| 1  | 148.075690        | 74.541483       |                |                  | F    |                    |                   |                |                   |                |                   | 11 |
| 2  | <b>205.097154</b> | 103.052215      |                |                  | G    | <b>1026.521453</b> | 513.764364        | 1009.494904    | 505.251090        | 1008.510888    | <b>504.759082</b> | 10 |
| 3  | <b>276.134268</b> | 138.570772      |                |                  | A    | 969.499989         | 485.253632        | 952.473440     | 476.740358        | 951.489424     | 476.248350        | 9  |
| 4  | 359.171383        | 180.089329      |                |                  | M    | <b>898.462875</b>  | 449.735075        | 881.436326     | 441.221801        | 880.452310     | 440.729793        | 8  |
| 5  | 472.255447        | 236.631361      |                |                  | L    | <b>815.425760</b>  | <b>408.216518</b> | 798.399211     | 399.703243        | 797.415195     | 399.211235        | 7  |
| 6  | <b>587.282390</b> | 294.144833      | 569.271825     | 285.139550       | D    | <b>702.341696</b>  | 351.674486        | 685.315147     | 343.161211        | 684.331131     | 342.669203        | 6  |
| 7  | 670.319505        | 335.663390      | 652.308940     | 326.658108       | M    | <b>587.314753</b>  | 294.161015        | 570.288204     | 285.647740        | 569.304188     | 285.155732        | 5  |
| 8  | 783.403569        | 392.205423      | 765.393004     | 383.200140       | L    | <b>504.277638</b>  | 252.642457        | 487.251089     | <b>244.129182</b> | 486.267073     | <b>243.637174</b> | 4  |
| 9  | 884.451248        | 442.729262      | 866.440683     | 433.723979       | T    | <b>391.193574</b>  | 196.100425        | 374.167025     | 187.587150        | 373.183009     | 187.095142        | 3  |
| 10 | 999.478191        | 500.242733      | 981.467626     | 491.237451       | D    | <b>290.145895</b>  | 145.576585        | 273.119346     | 137.063311        | 272.135330     | 136.571303        | 2  |
| 11 |                   |                 |                |                  | R    | <b>175.118952</b>  | 88.063114         | 158.092403     | 79.549839         |                |                   | 1  |

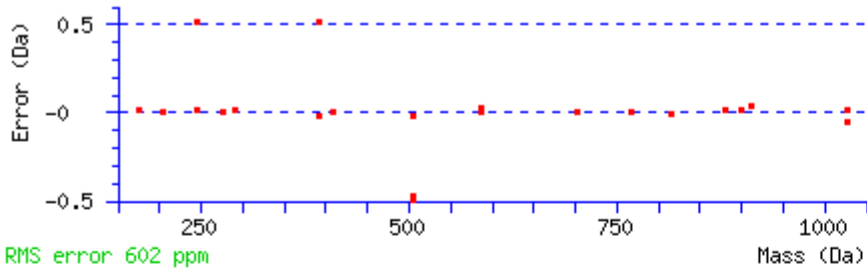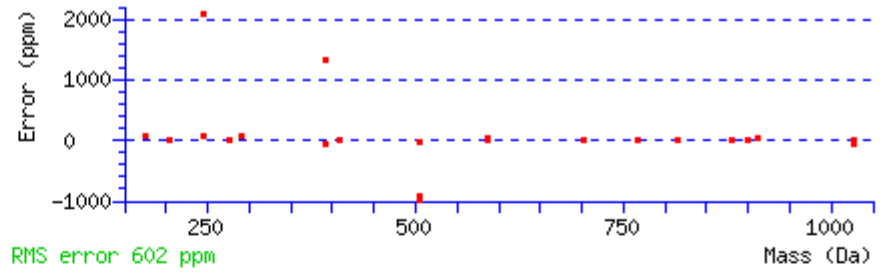

NCBI BLAST search of **FGAMLDMLTDR**

(Parameters: blastp, nr protein database, expect=20000, no filter, PAM30)

Other BLAST [web gateways](#)

All matches to this query

| Score | Mr(calc):   | Delta     | Sequence                    |
|-------|-------------|-----------|-----------------------------|
| 39.9  | 1300.579163 | -0.000715 | <a href="#">FGAMLDMLTDR</a> |
| 2.7   | 1300.575760 | 0.002688  | <a href="#">EEAYVMADAFR</a> |

Mascot: <http://www.matrixscience.com/>



# MASCOT Search Results

## Peptide View

MS/MS Fragmentation of **SDDSVIQLLNPNR**

Found in **CADMI\_HUMAN**, Cell adhesion molecule 1 OS=Homo sapiens GN=CADMI PE=1 SV=2

Match to Query 46225: 1469.753108 from(735.883830,2+) rtinseconds(3171) index(44354)

Title: Locus:1.1.1.2642.37

Data file 2011-11-10 - TFD - EP 3-2.mgf

Click mouse within plot area to zoom in by factor of two about that point

Or, Plot from  to  Da

Label all possible matches  Label matches used for scoring

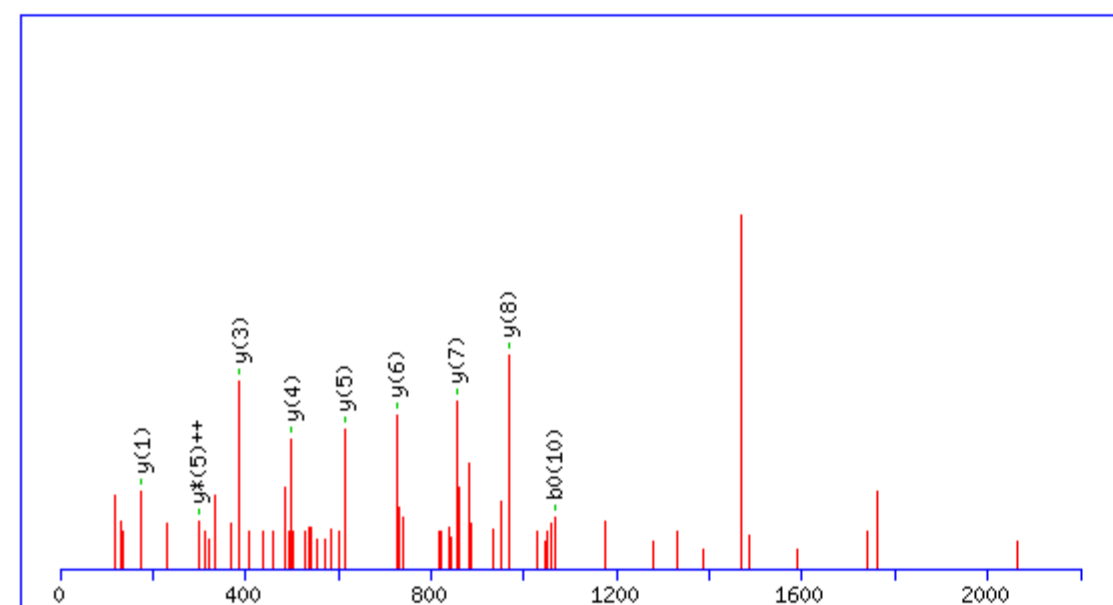

Monoisotopic mass of neutral peptide Mr(calc): 1469.747406

Fixed modifications: Propionamide (C) (apply to specified residues or termini only)

Ions Score: 51 Expect: 0.00012

Matches : 9/114 fragment ions using 12 most intense peaks [\(help\)](#)

| #  | b           | b <sup>++</sup> | b <sup>+</sup> | b <sup>*++</sup> | b <sup>0</sup>     | b <sup>0++</sup> | Seq. | y                 | y <sup>++</sup> | y <sup>+</sup> | y <sup>*++</sup>  | y <sup>0</sup> | y <sup>0++</sup> | #  |
|----|-------------|-----------------|----------------|------------------|--------------------|------------------|------|-------------------|-----------------|----------------|-------------------|----------------|------------------|----|
| 1  | 88.039304   | 44.523290       |                |                  | 70.028739          | 35.518008        | S    |                   |                 |                |                   |                |                  | 13 |
| 2  | 203.066247  | 102.036761      |                |                  | 185.055682         | 93.031479        | D    | 1383.722668       | 692.364972      | 1366.696119    | 683.851698        | 1365.712103    | 683.359689       | 12 |
| 3  | 318.093190  | 159.550233      |                |                  | 300.082625         | 150.544951       | D    | 1268.695725       | 634.851501      | 1251.669176    | 626.338226        | 1250.685160    | 625.846218       | 11 |
| 4  | 405.125218  | 203.066247      |                |                  | 387.114653         | 194.060964       | S    | 1153.668782       | 577.338029      | 1136.642233    | 568.824755        | 1135.658217    | 568.332746       | 10 |
| 5  | 504.193632  | 252.600454      |                |                  | 486.183067         | 243.595171       | V    | 1066.636754       | 533.822015      | 1049.610205    | 525.308741        |                |                  | 9  |
| 6  | 617.277696  | 309.142486      |                |                  | 599.267131         | 300.137204       | I    | <b>967.568340</b> | 484.287808      | 950.541791     | 475.774534        |                |                  | 8  |
| 7  | 745.336274  | 373.171775      | 728.309725     | 364.658501       | 727.325709         | 364.166493       | Q    | <b>854.484276</b> | 427.745776      | 837.457727     | 419.232502        |                |                  | 7  |
| 8  | 858.420338  | 429.713807      | 841.393789     | 421.200533       | 840.409773         | 420.708525       | L    | <b>726.425698</b> | 363.716487      | 709.399149     | 355.203213        |                |                  | 6  |
| 9  | 971.504402  | 486.255839      | 954.477853     | 477.742565       | 953.493837         | 477.250557       | L    | <b>613.341634</b> | 307.174455      | 596.315085     | <b>298.661181</b> |                |                  | 5  |
| 10 | 1085.547329 | 543.277303      | 1068.520780    | 534.764028       | <b>1067.536764</b> | 534.272020       | N    | <b>500.257570</b> | 250.632423      | 483.231021     | 242.119148        |                |                  | 4  |
| 11 | 1182.600093 | 591.803685      | 1165.573544    | 583.290410       | 1164.589528        | 582.798402       | P    | <b>386.214643</b> | 193.610959      | 369.188094     | 185.097685        |                |                  | 3  |
| 12 | 1296.643020 | 648.825148      | 1279.616471    | 640.311874       | 1278.632455        | 639.819865       | N    | 289.161879        | 145.084577      | 272.135330     | 136.571303        |                |                  | 2  |
| 13 |             |                 |                |                  |                    |                  | R    | <b>175.118952</b> | 88.063114       | 158.092403     | 79.549839         |                |                  | 1  |

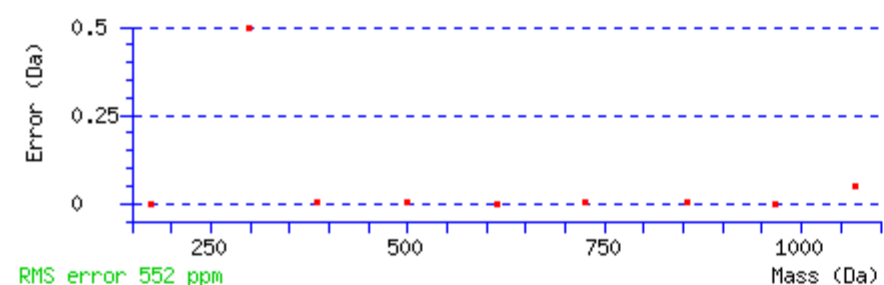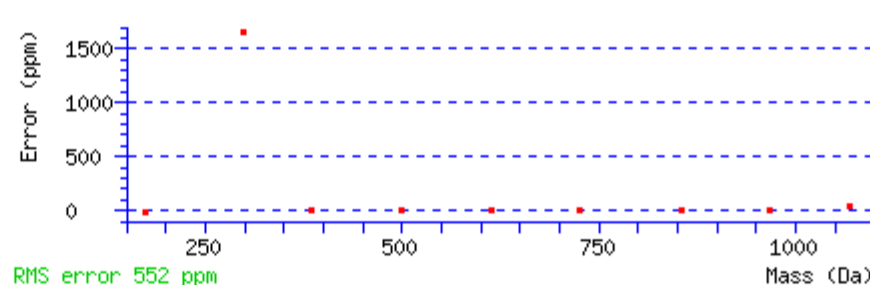

NCBI BLAST search of [SDDSVIQLLNPNR](#)

(Parameters: blastp, nr protein database, expect=20000, no filter, PAM30)

Other BLAST [web gateways](#)

## All matches to this query

| Score | Mr(calc):   | Delta     | Sequence                       |
|-------|-------------|-----------|--------------------------------|
| 50.9  | 1469.747406 | 0.005702  | <a href="#">SDDSVIQLLNPNR</a>  |
| 14.8  | 1469.766022 | -0.012914 | <a href="#">NVEIPQLNQLMR</a>   |
| 14.2  | 1469.751404 | 0.001704  | <a href="#">EAWLLPPEKEAR</a>   |
| 11.8  | 1469.740860 | 0.012248  | <a href="#">EMSPQRNLLPNR</a>   |
| 8.5   | 1469.751434 | 0.001674  | <a href="#">AIFQDPEGLPDLR</a>  |
| 5.0   | 1469.747421 | 0.005687  | <a href="#">TDVSTLVELSNHR</a>  |
| 4.5   | 1469.740845 | 0.012263  | <a href="#">ERVAAAMENPNLR</a>  |
| 1.4   | 1469.762665 | -0.009557 | <a href="#">LAWAPLVDAQGSAR</a> |
| 0.1   | 1469.754837 | -0.001729 | <a href="#">ATVAPLPMTPVPGR</a> |

# MASCOT Search Results

## Peptide View

MS/MS Fragmentation of **LTSLGVIGALVK**

Found in **RCD1\_HUMAN**, Cell differentiation protein RCD1 homolog OS=Homo sapiens GN=RQCD1 PE=1 SV=1

Match to Query 24345: 1169.740068 from(585.877310,2+) rtinseconds(3497) index(45636)

Title: Locus:1.1.1.2947.12

Data file 2011-11-10 - TFD - EP 3-5.mgf

Click mouse within plot area to zoom in by factor of two about that point

Or, Plot from  to  Da

Label all possible matches  Label matches used for scoring

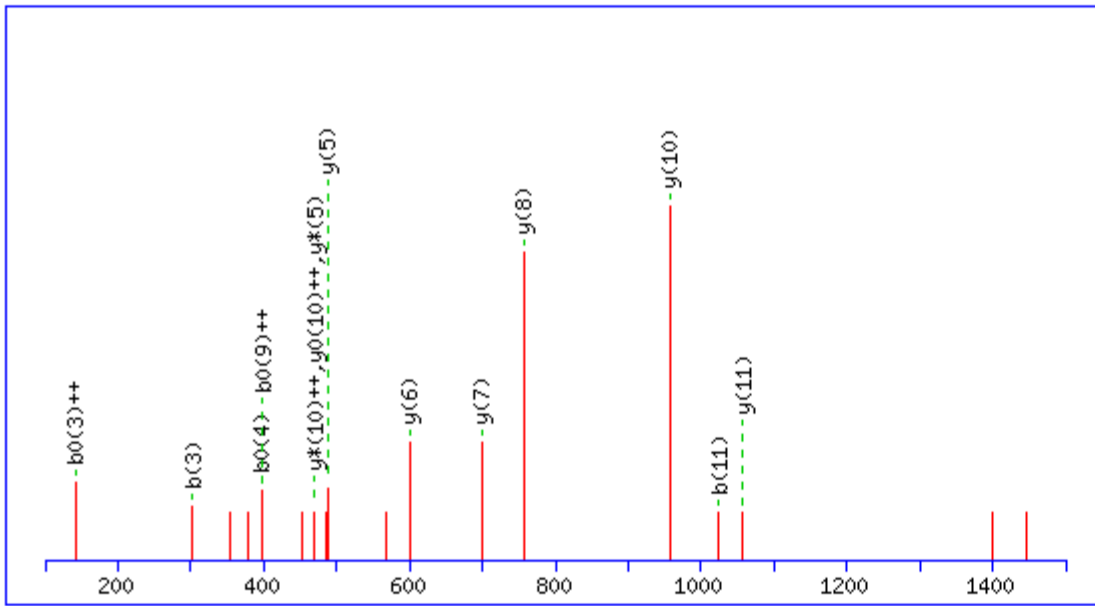

Monoisotopic mass of neutral peptide Mr(calc): 1169.738358

Fixed modifications: Propionamide (C) (apply to specified residues or termini only)

Ions Score: 63 Expect: 6.4e-007

Matches : 14/90 fragment ions using 13 most intense peaks ([help](#))

| #  | b                  | b <sup>++</sup> | b <sup>0</sup>    | b <sup>0++</sup>  | Seq. | y                  | y <sup>++</sup> | y <sup>*</sup>    | y <sup>*++</sup>  | y <sup>0</sup> | y <sup>0++</sup>  | #  |
|----|--------------------|-----------------|-------------------|-------------------|------|--------------------|-----------------|-------------------|-------------------|----------------|-------------------|----|
| 1  | 114.091340         | 57.549308       |                   |                   | L    |                    |                 |                   |                   |                |                   | 12 |
| 2  | 215.139019         | 108.073147      | 197.128454        | 99.067865         | T    | <b>1057.661573</b> | 529.334425      | 1040.635024       | 520.821150        | 1039.651008    | 520.329142        | 11 |
| 3  | <b>302.171047</b>  | 151.589161      | 284.160482        | <b>142.583879</b> | S    | <b>956.613894</b>  | 478.810585      | 939.587345        | <b>470.297311</b> | 938.603329     | <b>469.805303</b> | 10 |
| 4  | 415.255111         | 208.131193      | <b>397.244546</b> | 199.125911        | L    | 869.581866         | 435.294571      | 852.555317        | 426.781297        |                |                   | 9  |
| 5  | 472.276575         | 236.641925      | 454.266010        | 227.636643        | G    | <b>756.497802</b>  | 378.752539      | 739.471253        | 370.239265        |                |                   | 8  |
| 6  | 571.344989         | 286.176133      | 553.334424        | 277.170850        | V    | <b>699.476338</b>  | 350.241807      | 682.449789        | 341.728533        |                |                   | 7  |
| 7  | 684.429053         | 342.718165      | 666.418488        | 333.712882        | I    | <b>600.407924</b>  | 300.707600      | 583.381375        | 292.194326        |                |                   | 6  |
| 8  | 741.450517         | 371.228897      | 723.439952        | 362.223614        | G    | <b>487.323860</b>  | 244.165568      | <b>470.297311</b> | 235.652294        |                |                   | 5  |
| 9  | 812.487631         | 406.747454      | 794.477066        | <b>397.742171</b> | A    | 430.302396         | 215.654836      | 413.275847        | 207.141562        |                |                   | 4  |
| 10 | 925.571695         | 463.289486      | 907.561130        | 454.284203        | L    | 359.265282         | 180.136279      | 342.238733        | 171.623005        |                |                   | 3  |
| 11 | <b>1024.640109</b> | 512.823692      | 1006.629544       | 503.818410        | V    | 246.181218         | 123.594247      | 229.154669        | 115.080973        |                |                   | 2  |
| 12 |                    |                 |                   |                   | K    | 147.112804         | 74.060040       | 130.086255        | 65.546766         |                |                   | 1  |

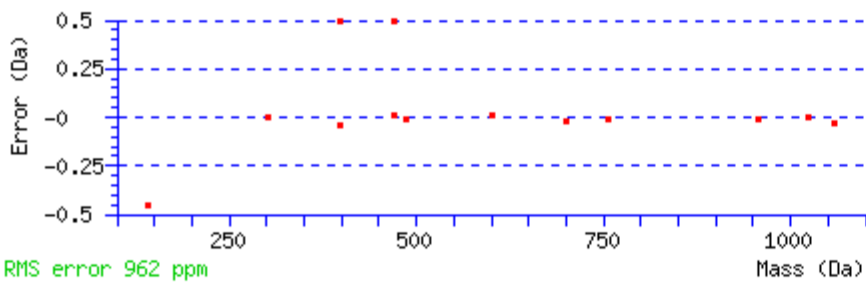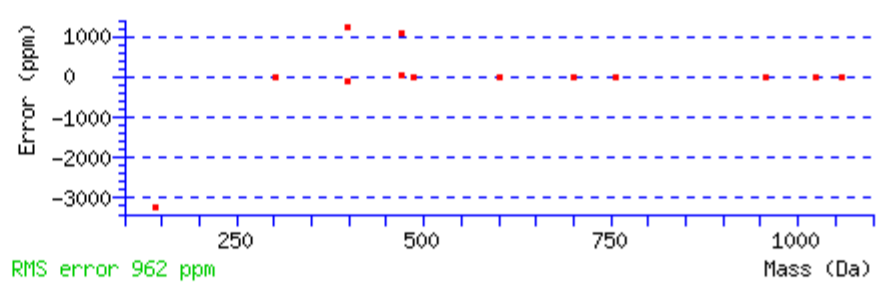

NCBI BLAST search of [LTSLGVIGALVK](#)

(Parameters: blastp, nr protein database, expect=20000, no filter, PAM30)

Other BLAST [web gateways](#)

All matches to this query

| Score | Mr(calc):   | Delta    | Sequence                     |
|-------|-------------|----------|------------------------------|
| 62.7  | 1169.738358 | 0.001710 | <a href="#">LTSLGVIGALVK</a> |
| 6.1   | 1169.738342 | 0.001726 | <a href="#">LITQDLVKLK</a>   |
| 1.4   | 1169.738358 | 0.001710 | <a href="#">VTITGLLPKTK</a>  |

Mascot: <http://www.matrixscience.com/>

# MASCOT SCIENCE Mascot Search Results

## Peptide View

### MS/MS Fragmentation of LLLPTPTVK

Found in **CCAR1\_HUMAN**, Cell division cycle and apoptosis regulator protein 1 OS=Homo sapiens GN=CCAR1 PE=1 SV=2

Match to Query 14410: 980.626788 from(491.320670,2+) rtinseconds(2482) index(31998)

Title: Locus:1.1.1.2260.9

Data file 2011-11-12 - TFD - EP 6-1.mgf

Click mouse within plot area to zoom in by factor of two about that point

Or, Plot from  to  Da

Label all possible matches  Label matches used for scoring

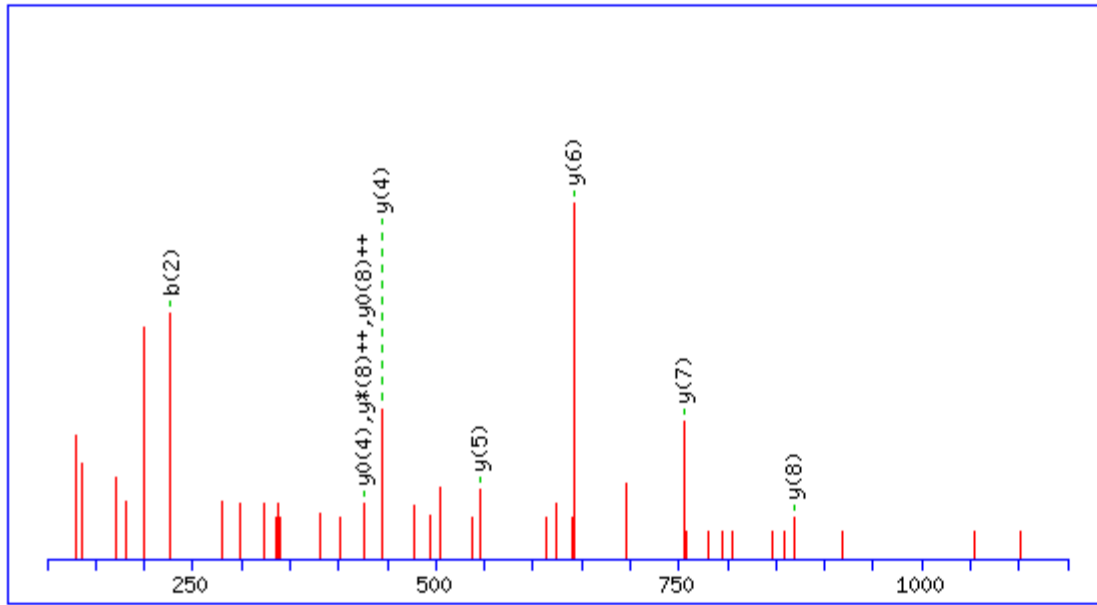

Monoisotopic mass of neutral peptide Mr(calc): 980.627014

Fixed modifications: Propionamide (C) (apply to specified residues or termini only)

Ions Score: 41 Expect: 7.8e-005

Matches : 9/68 fragment ions using 8 most intense peaks ([help](#))

| # | b          | b <sup>++</sup> | b <sup>0</sup> | b <sup>0++</sup> | Seq. | y          | y <sup>++</sup> | y <sup>*</sup> | y <sup>*++</sup> | y <sup>0</sup> | y <sup>0++</sup> | # |
|---|------------|-----------------|----------------|------------------|------|------------|-----------------|----------------|------------------|----------------|------------------|---|
| 1 | 114.091340 | 57.549308       |                |                  | L    |            |                 |                |                  |                |                  | 9 |
| 2 | 227.175404 | 114.091340      |                |                  | L    | 868.550232 | 434.778754      | 851.523683     | 426.265480       | 850.539667     | 425.773472       | 8 |
| 3 | 340.259468 | 170.633372      |                |                  | L    | 755.466168 | 378.236722      | 738.439619     | 369.723448       | 737.455603     | 369.231440       | 7 |
| 4 | 437.312232 | 219.159754      |                |                  | P    | 642.382104 | 321.694690      | 625.355555     | 313.181416       | 624.371539     | 312.689408       | 6 |
| 5 | 538.359911 | 269.683594      | 520.349346     | 260.678311       | T    | 545.329340 | 273.168308      | 528.302791     | 264.655034       | 527.318775     | 264.163026       | 5 |
| 6 | 635.412675 | 318.209976      | 617.402110     | 309.204693       | P    | 444.281661 | 222.644468      | 427.255112     | 214.131194       | 426.271096     | 213.639186       | 4 |
| 7 | 736.460354 | 368.733815      | 718.449789     | 359.728533       | T    | 347.228897 | 174.118086      | 330.202348     | 165.604812       | 329.218332     | 165.112804       | 3 |
| 8 | 835.528768 | 418.268022      | 817.518203     | 409.262740       | V    | 246.181218 | 123.594247      | 229.154669     | 115.080972       |                |                  | 2 |
| 9 |            |                 |                |                  | K    | 147.112804 | 74.060040       | 130.086255     | 65.546765        |                |                  | 1 |

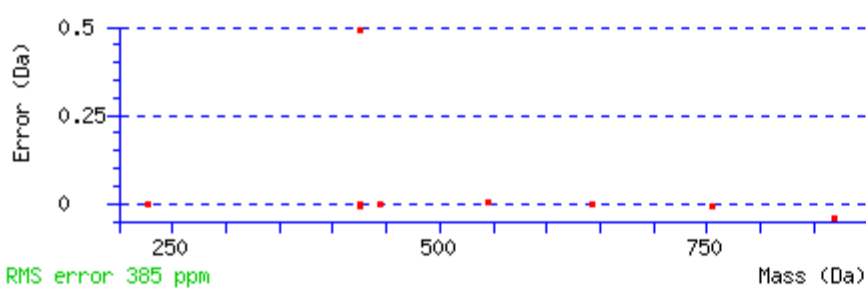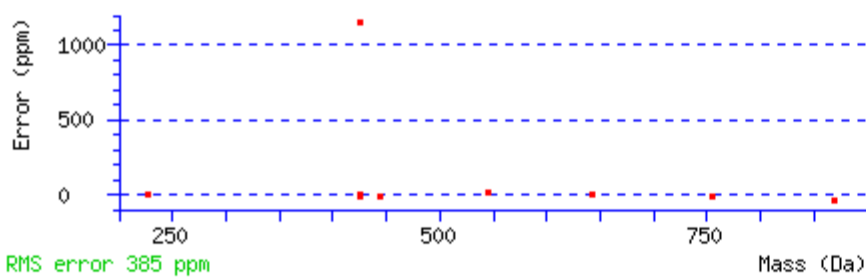

### NCBI BLAST search of LLLPTPTVK

(Parameters: blastp, nr protein database, expect=20000, no filter, PAM30)

Other BLAST [web gateways](#)

### All matches to this query

| Score | Mr(calc):  | Delta     | Sequence                  |
|-------|------------|-----------|---------------------------|
| 41.1  | 980.627014 | -0.000226 | <a href="#">LLLPTPTVK</a> |
| 12.4  | 980.626999 | -0.000211 | <a href="#">LLTPIPSK</a>  |
| 1.0   | 980.626999 | -0.000211 | <a href="#">LEPLGIIVK</a> |

# Mascot Search Results

## Peptide View

MS/MS Fragmentation of **CGETGHVAINCSK**

Found in **CNBP\_HUMAN**, Cellular nucleic acid-binding protein OS=Homo sapiens GN=CNBP PE=1 SV=1

Match to Query 777755: 1431.632308 from(716.823430,2+) rtinseconds(1002) index(411943)

Title: Locus:1.1.1.716.17

Data file C:\Program Files (x86)\Matrix Science\Mascot Daemon\mgf3 TFD - Epitel - R2\mascot\_daemon\_merge.mgf

Click mouse within plot area to zoom in by factor of two about that point

Or, Plot from  to  Da

Label all possible matches  Label matches used for scoring

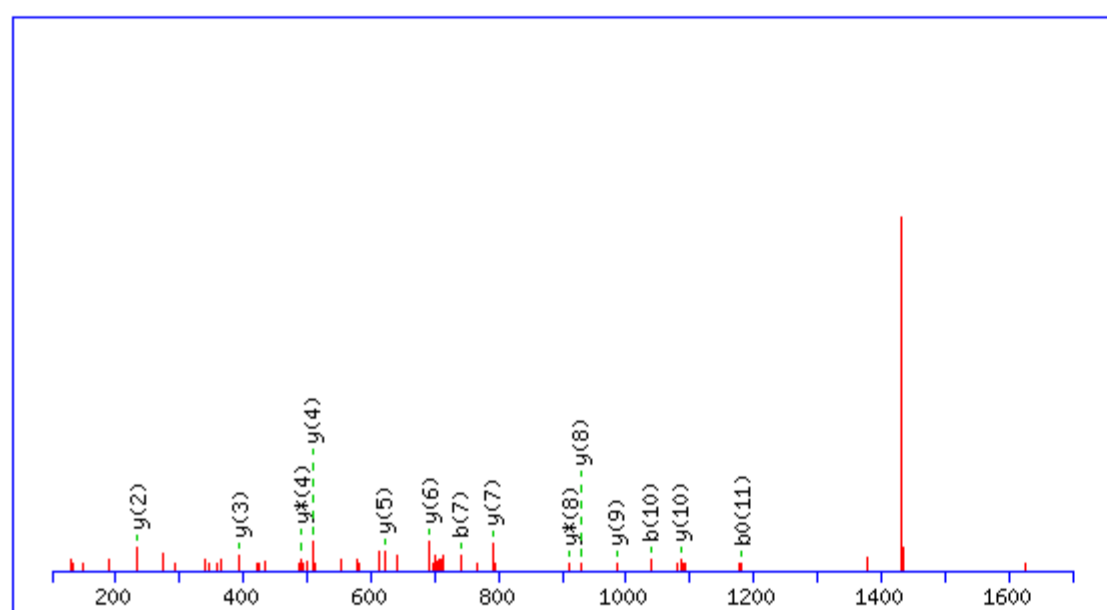

Monoisotopic mass of neutral peptide Mr(calc): 1431.623489

Fixed modifications: Carbamidomethyl (C) (apply to specified residues or termini only)

Ions Score: 72 Expect: 6.6e-007

Matches : 14/120 fragment ions using 22 most intense peaks ([help](#))

| #  | b                  | b <sup>++</sup> | b <sup>*</sup> | b <sup>*++</sup> | b <sup>0</sup>     | b <sup>0++</sup> | Seq. | y                  | y <sup>++</sup> | y <sup>*</sup>    | y <sup>*++</sup> | y <sup>0</sup> | y <sup>0++</sup> | #  |
|----|--------------------|-----------------|----------------|------------------|--------------------|------------------|------|--------------------|-----------------|-------------------|------------------|----------------|------------------|----|
| 1  | 161.037925         | 81.022600       |                |                  |                    |                  | C    |                    |                 |                   |                  |                |                  | 13 |
| 2  | 218.059389         | 109.533333      |                |                  |                    |                  | G    | 1272.600112        | 636.803694      | 1255.573563       | 628.290420       | 1254.589547    | 627.798412       | 12 |
| 3  | 347.101982         | 174.054629      |                |                  | 329.091417         | 165.049347       | E    | 1215.578648        | 608.292962      | 1198.552099       | 599.779688       | 1197.568083    | 599.287680       | 11 |
| 4  | 448.149661         | 224.578469      |                |                  | 430.139096         | 215.573186       | T    | <b>1086.536055</b> | 543.771666      | 1069.509506       | 535.258391       | 1068.525490    | 534.766383       | 10 |
| 5  | 505.171125         | 253.089201      |                |                  | 487.160560         | 244.083918       | G    | <b>985.488376</b>  | 493.247826      | 968.461827        | 484.734552       | 967.477811     | 484.242544       | 9  |
| 6  | 642.230037         | 321.618657      |                |                  | 624.219472         | 312.613374       | H    | <b>928.466912</b>  | 464.737094      | <b>911.440363</b> | 456.223820       | 910.456347     | 455.731812       | 8  |
| 7  | <b>741.298451</b>  | 371.152864      |                |                  | 723.287886         | 362.147581       | V    | <b>791.408000</b>  | 396.207638      | 774.381451        | 387.694364       | 773.397435     | 387.202356       | 7  |
| 8  | 812.335565         | 406.671421      |                |                  | 794.325000         | 397.666138       | A    | <b>692.339586</b>  | 346.673431      | 675.313037        | 338.160157       | 674.329021     | 337.668149       | 6  |
| 9  | 925.419629         | 463.213453      |                |                  | 907.409064         | 454.208170       | I    | <b>621.302472</b>  | 311.154874      | 604.275923        | 302.641600       | 603.291907     | 302.149592       | 5  |
| 10 | <b>1039.462556</b> | 520.234916      | 1022.436007    | 511.721641       | 1021.451991        | 511.229633       | N    | <b>508.218408</b>  | 254.612842      | <b>491.191859</b> | 246.099568       | 490.207843     | 245.607560       | 4  |
| 11 | 1199.493205        | 600.250241      | 1182.466656    | 591.736966       | <b>1181.482640</b> | 591.244958       | C    | <b>394.175481</b>  | 197.591379      | 377.148932        | 189.078104       | 376.164916     | 188.586096       | 3  |
| 12 | 1286.525233        | 643.766255      | 1269.498684    | 635.252980       | 1268.514668        | 634.760972       | S    | <b>234.144832</b>  | 117.576054      | 217.118283        | 109.062780       | 216.134267     | 108.570772       | 2  |
| 13 |                    |                 |                |                  |                    |                  | K    | 147.112804         | 74.060040       | 130.086255        | 65.546765        |                |                  | 1  |

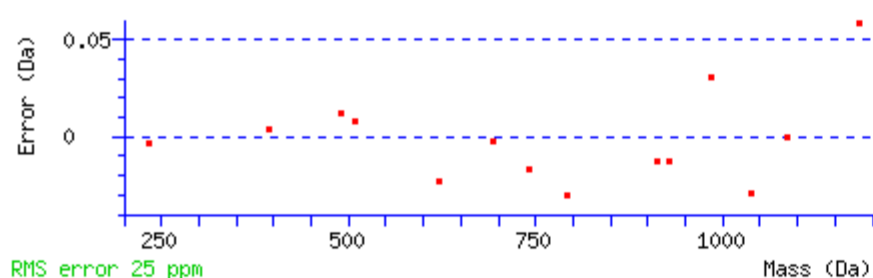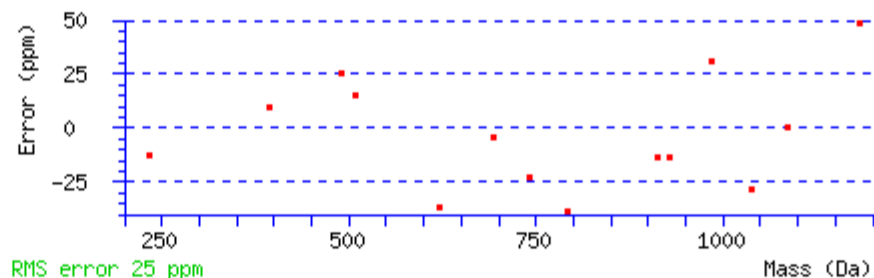

NCBI BLAST search of **CGETGHVAINCSK**

(Parameters: blastp, nr protein database, expect=20000, no filter, PAM30)

Other BLAST [web gateways](#)

All matches to this query

| Score | Mr(calc):   | Delta     | Sequence                      |
|-------|-------------|-----------|-------------------------------|
| 71.8  | 1431.623489 | 0.008819  | <a href="#">CGETGHVAINCSK</a> |
| 3.5   | 1431.640518 | -0.008210 | <a href="#">EYEGYEVESLK</a>   |

Mascot: <http://www.matrixscience.com/>

**Peptide View**

MS/MS Fragmentation of **TTEINFK**

Found in **RABP1\_HUMAN**, Cellular retinoic acid-binding protein 1 OS=Homo sapiens GN=CRABP1 PE=1 SV=2

Match to Query 4462: 851.435008 from(426.724780,2+) rtinseconds(1625) index(9455)

Title: Locus:1.1.1.1946.6

Data file 2011-11-12 - TFD - EP 5-7.mgf

Click mouse within plot area to zoom in by factor of two about that point

Or, Plot from  to  Da

Label all possible matches  Label matches used for scoring

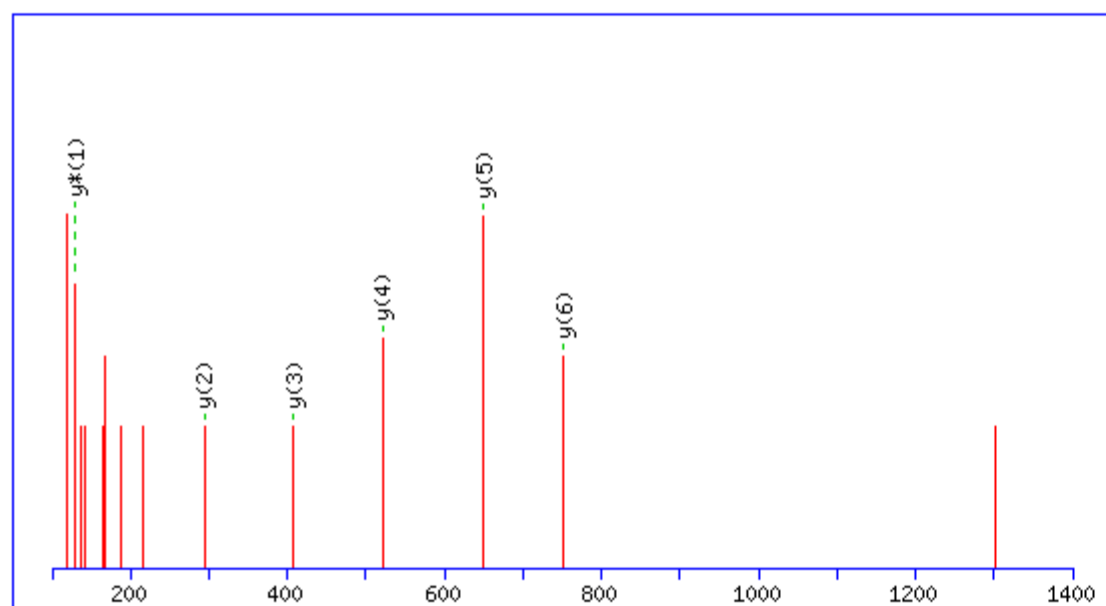

Monoisotopic mass of neutral peptide Mr(calc): 851.438873

Fixed modifications: Propionamide (C) (apply to specified residues or termini only)

Ions Score: 48 Expect: 0.00014

Matches : 6/56 fragment ions using 7 most intense peaks ([help](#))

| # | b          | b <sup>++</sup> | b <sup>*</sup> | b <sup>*++</sup> | b <sup>0</sup> | b <sup>0++</sup> | Seq. | y                 | y <sup>++</sup> | y <sup>*</sup>    | y <sup>*++</sup> | y <sup>0</sup> | y <sup>0++</sup> | # |
|---|------------|-----------------|----------------|------------------|----------------|------------------|------|-------------------|-----------------|-------------------|------------------|----------------|------------------|---|
| 1 | 102.054955 | 51.531116       |                |                  | 84.044390      | 42.525833        | T    |                   |                 |                   |                  |                |                  | 7 |
| 2 | 203.102634 | 102.054955      |                |                  | 185.092069     | 93.049672        | T    | <b>751.398481</b> | 376.202879      | 734.371932        | 367.689604       | 733.387916     | 367.197596       | 6 |
| 3 | 332.145227 | 166.576252      |                |                  | 314.134662     | 157.570969       | E    | <b>650.350802</b> | 325.679039      | 633.324253        | 317.165765       | 632.340237     | 316.673757       | 5 |
| 4 | 445.229291 | 223.118284      |                |                  | 427.218726     | 214.113001       | I    | <b>521.308209</b> | 261.157743      | 504.281660        | 252.644468       |                |                  | 4 |
| 5 | 559.272218 | 280.139747      | 542.245669     | 271.626473       | 541.261653     | 271.134465       | N    | <b>408.224145</b> | 204.615710      | 391.197596        | 196.102436       |                |                  | 3 |
| 6 | 706.340632 | 353.673954      | 689.314083     | 345.160680       | 688.330067     | 344.668672       | F    | <b>294.181218</b> | 147.594247      | 277.154669        | 139.080972       |                |                  | 2 |
| 7 |            |                 |                |                  |                |                  | K    | 147.112804        | 74.060040       | <b>130.086255</b> | 65.546765        |                |                  | 1 |

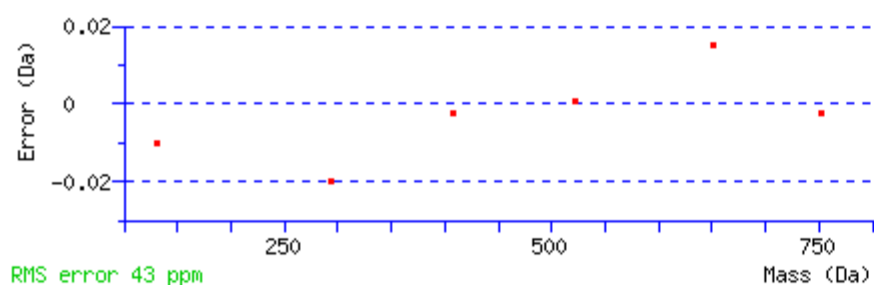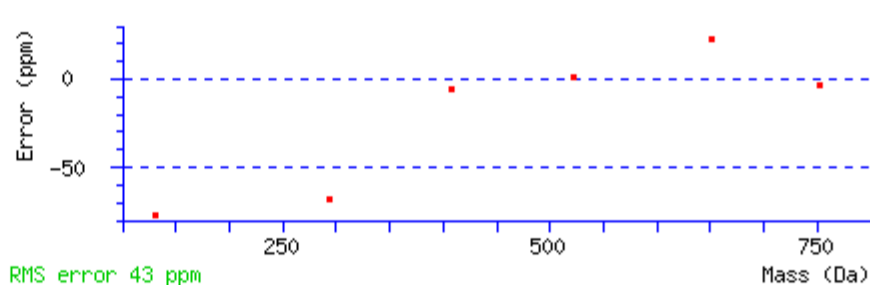

NCBI BLAST search of [TTEINFK](#)

(Parameters: blastp, nr protein database, expect=20000, no filter, PAM30)

Other BLAST [web gateways](#)

**All matches to this query**

| Score | Mr(calc):  | Delta     | Sequence                |
|-------|------------|-----------|-------------------------|
| 47.7  | 851.438873 | -0.003865 | <a href="#">TTEINFK</a> |
| 16.7  | 851.438873 | -0.003865 | <a href="#">TTLNEFK</a> |
| 6.2   | 851.438889 | -0.003881 | <a href="#">TTFDPKK</a> |

**Peptide View**

MS/MS Fragmentation of **MNFGDFLTVMTQK**

Found in **CETN2\_HUMAN**, Centrin-2 OS=Homo sapiens GN=CETN2 PE=1 SV=1

Match to Query 43285: 1562.700868 from(782.357710,2+) rtinseconds(3036) index(37439)

Title: Locus:1.1.1.2423.15

Data file 2011-11-10 - TFD - EP 3-6.mgf

Click mouse within plot area to zoom in by factor of two about that point

Or, Plot from  to  Da

Label all possible matches  Label matches used for scoring

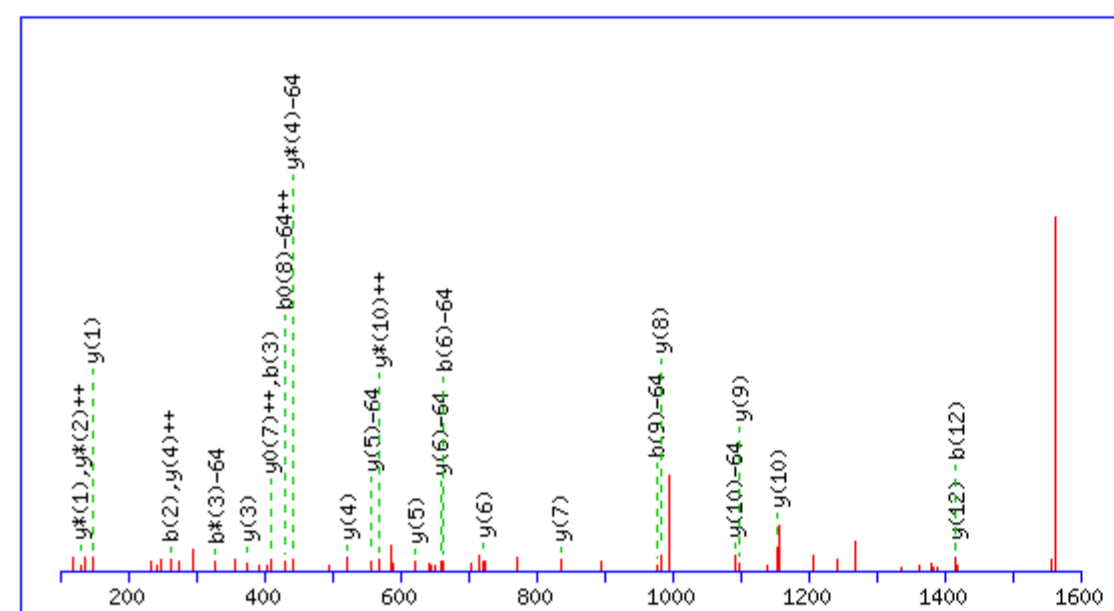

Monoisotopic mass of neutral peptide Mr(calc): 1562.710922

Fixed modifications: Propionamide (C) (apply to specified residues or termini only)

Variable modifications:

M1 : Oxidation (M), with neutral losses 0.000000 (shown in table), 63.998285

M10 : Oxidation (M), with neutral losses 0.000000 (shown in table), 63.998285

Ions Score: 55 Expect: 1.9e-005

Matches : 26/246 fragment ions using 44 most intense peaks [\(help\)](#)

| #  | b                  | b <sup>++</sup> | b <sup>*</sup> | b <sup>*++</sup> | b <sup>0</sup> | b <sup>0++</sup> | Seq. | y                  | y <sup>++</sup>   | y <sup>*</sup>    | y <sup>*++</sup>  | y <sup>0</sup> | y <sup>0++</sup>  | #  |
|----|--------------------|-----------------|----------------|------------------|----------------|------------------|------|--------------------|-------------------|-------------------|-------------------|----------------|-------------------|----|
| 1  | 148.042676         | 74.524976       |                |                  |                |                  | M    |                    |                   |                   |                   |                |                   | 13 |
| 2  | <b>262.085603</b>  | 131.546439      | 245.059054     | 123.033165       |                |                  | N    | <b>1416.682780</b> | 708.845028        | 1399.656231       | 700.331754        | 1398.672215    | 699.839746        | 12 |
| 3  | <b>409.154017</b>  | 205.080647      | 392.127468     | 196.567372       |                |                  | F    | 1302.639853        | 651.823565        | 1285.613304       | 643.310290        | 1284.629288    | 642.818282        | 11 |
| 4  | 466.175481         | 233.591378      | 449.148932     | 225.078104       |                |                  | G    | <b>1155.571439</b> | 578.289358        | 1138.544890       | <b>569.776083</b> | 1137.560874    | 569.284075        | 10 |
| 5  | 581.202424         | 291.104850      | 564.175875     | 282.591576       | 563.191859     | 282.099568       | D    | <b>1098.549975</b> | 549.778626        | 1081.523426       | 541.265351        | 1080.539410    | 540.773343        | 9  |
| 6  | 728.270838         | 364.639057      | 711.244289     | 356.125783       | 710.260273     | 355.633775       | F    | <b>983.523032</b>  | 492.265154        | 966.496483        | 483.751880        | 965.512467     | 483.259872        | 8  |
| 7  | 841.354902         | 421.181089      | 824.328353     | 412.667815       | 823.344337     | 412.175807       | L    | <b>836.454618</b>  | 418.730947        | 819.428069        | 410.217673        | 818.444053     | <b>409.725665</b> | 7  |
| 8  | 942.402581         | 471.704929      | 925.376032     | 463.191654       | 924.392016     | 462.699646       | T    | <b>723.370554</b>  | 362.188915        | 706.344005        | 353.675641        | 705.359989     | 353.183633        | 6  |
| 9  | 1041.470995        | 521.239136      | 1024.444446    | 512.725861       | 1023.460430    | 512.233853       | V    | <b>622.322875</b>  | 311.665076        | 605.296326        | 303.151801        | 604.312310     | 302.659793        | 5  |
| 10 | 1188.506395        | 594.756836      | 1171.479846    | 586.243561       | 1170.495830    | 585.751553       | M    | <b>523.254461</b>  | <b>262.130869</b> | 506.227912        | 253.617594        | 505.243896     | 253.125586        | 4  |
| 11 | 1289.554074        | 645.280675      | 1272.527525    | 636.767401       | 1271.543509    | 636.275393       | T    | <b>376.219061</b>  | 188.613168        | 359.192512        | 180.099894        | 358.208496     | 179.607886        | 3  |
| 12 | <b>1417.612652</b> | 709.309964      | 1400.586103    | 700.796690       | 1399.602087    | 700.304682       | Q    | 275.171382         | 138.089329        | 258.144833        | <b>129.576054</b> |                |                   | 2  |
| 13 |                    |                 |                |                  |                |                  | K    | <b>147.112804</b>  | 74.060040         | <b>130.086255</b> | 65.546765         |                |                   | 1  |

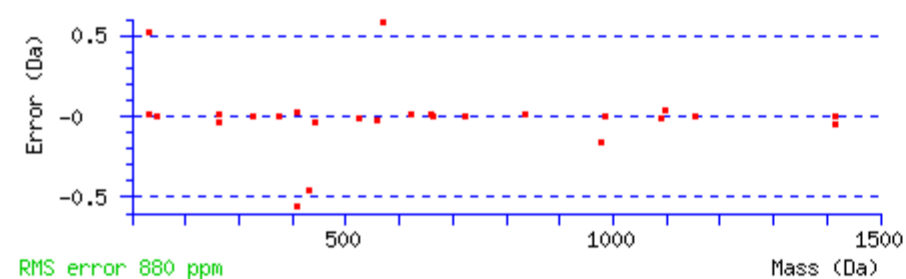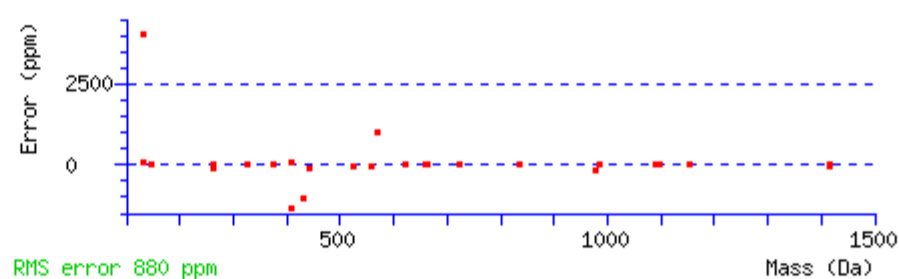

NCBI BLAST search of [MNFGDFLTVMTQK](#)

(Parameters: blastp, nr protein database, expect=20000, no filter, PAM30)

Other BLAST [web gateways](#)

All matches to this query

| Score | Mr(calc):   | Delta     | Sequence                      |
|-------|-------------|-----------|-------------------------------|
| 54.8  | 1562.710922 | -0.010054 | <a href="#">MNFGDFLTVMTQK</a> |
| 5.7   | 1562.707336 | -0.006468 | <a href="#">KLDDANHHQDQK</a>  |
| 0.2   | 1562.689743 | 0.011125  | <a href="#">YFASYMEQHLMK</a>  |

# MASCOT Search Results

## Peptide View

MS/MS Fragmentation of **VQTAVTMGK**

Found in **CHM1B\_HUMAN**, Charged multivesicular body protein 1b OS=Homo sapiens GN=CHMP1B PE=1 SV=1

Match to Query 11131: 933.496468 from(467.755510,2+) rtinseconds(1163) index(5315)

Title: Locus:1.1.1.1763.19

Data file 2011-11-14 - TFD - EP 8-5.mgf

Click mouse within plot area to zoom in by factor of two about that point

Or, Plot from  to  Da

Label all possible matches  Label matches used for scoring

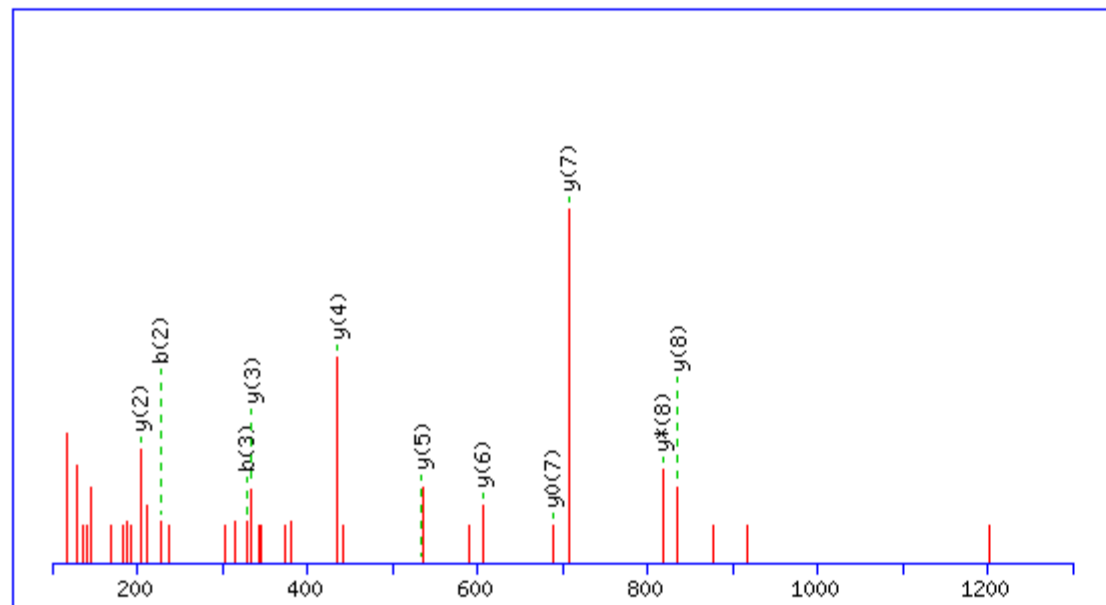

Monoisotopic mass of neutral peptide Mr(calc): 933.495361

Fixed modifications: Propionamide (C) (apply to specified residues or termini only)

Ions Score: 67 Expect: 1.6e-006

Matches : 11/84 fragment ions using 14 most intense peaks [\(help\)](#)

| # | b                 | b <sup>++</sup> | b <sup>*</sup> | b <sup>*++</sup> | b <sup>0</sup> | b <sup>0++</sup> | Seq. | y                 | y <sup>++</sup> | y <sup>*</sup>    | y <sup>*++</sup> | y <sup>0</sup>    | y <sup>0++</sup> | # |
|---|-------------------|-----------------|----------------|------------------|----------------|------------------|------|-------------------|-----------------|-------------------|------------------|-------------------|------------------|---|
| 1 | 100.075690        | 50.541483       |                |                  |                |                  | V    |                   |                 |                   |                  |                   |                  | 9 |
| 2 | <b>228.134268</b> | 114.570772      | 211.107719     | 106.057498       |                |                  | Q    | <b>835.434217</b> | 418.220747      | <b>818.407668</b> | 409.707472       | 817.423652        | 409.215464       | 8 |
| 3 | <b>329.181947</b> | 165.094612      | 312.155398     | 156.581337       | 311.171382     | 156.089329       | T    | <b>707.375639</b> | 354.191458      | 690.349090        | 345.678183       | <b>689.365074</b> | 345.186175       | 7 |
| 4 | 400.219061        | 200.613169      | 383.192512     | 192.099894       | 382.208496     | 191.607886       | A    | <b>606.327960</b> | 303.667618      | 589.301411        | 295.154344       | 588.317395        | 294.662336       | 6 |
| 5 | 499.287475        | 250.147376      | 482.260926     | 241.634101       | 481.276910     | 241.142093       | V    | <b>535.290846</b> | 268.149061      | 518.264297        | 259.635787       | 517.280281        | 259.143779       | 5 |
| 6 | 600.335154        | 300.671215      | 583.308605     | 292.157941       | 582.324589     | 291.665933       | T    | <b>436.222432</b> | 218.614854      | 419.195883        | 210.101579       | 418.211867        | 209.609571       | 4 |
| 7 | 731.375639        | 366.191458      | 714.349090     | 357.678183       | 713.365074     | 357.186175       | M    | <b>335.174753</b> | 168.091015      | 318.148204        | 159.577740       |                   |                  | 3 |
| 8 | 788.397103        | 394.702190      | 771.370554     | 386.188915       | 770.386538     | 385.696907       | G    | <b>204.134268</b> | 102.570772      | 187.107719        | 94.057498        |                   |                  | 2 |
| 9 |                   |                 |                |                  |                |                  | K    | 147.112804        | 74.060040       | 130.086255        | 65.546765        |                   |                  | 1 |

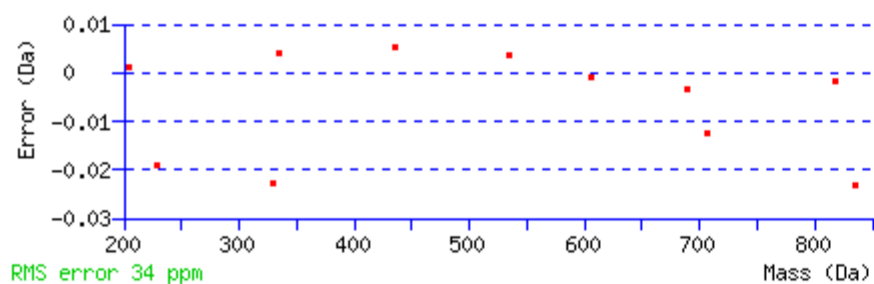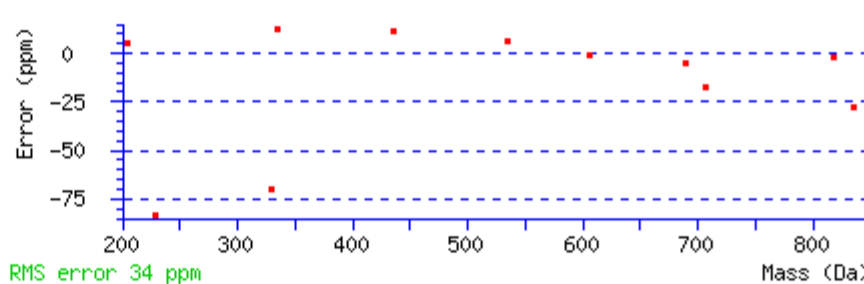

NCBI BLAST search of [VQTAVTMGK](#)

(Parameters: blastp, nr protein database, expect=20000, no filter, PAM30)

Other BLAST [web gateways](#)

## All matches to this query

| Score | Mr(calc):  | Delta     | Sequence                   |
|-------|------------|-----------|----------------------------|
| 66.5  | 933.495361 | 0.001107  | <a href="#">VQTAVTMGK</a>  |
| 4.4   | 933.503220 | -0.006752 | <a href="#">VFSKQPGR</a>   |
| 0.8   | 933.503220 | -0.006752 | <a href="#">VTNFVAQR</a>   |
| 0.6   | 933.503220 | -0.006752 | <a href="#">GLGFSIAGGR</a> |

# **MASCOT** Mascot Search Results

## Peptide View

MS/MS Fragmentation of **IAQQLER**

Found in **CHMP6\_HUMAN**, Charged multivesicular body protein 6 OS=Homo sapiens GN=CHMP6 PE=1 SV=3

Match to Query 4695: 856.471588 from(429.243070,2+) rtinseconds(1034) index(3697)

Title: Locus:1.1.1.1812.11

Data file 2011-11-12 - TFD - EP 5-4.mgf

Click mouse within plot area to zoom in by factor of two about that point

Or, Plot from  to  Da

Label all possible matches  Label matches used for scoring

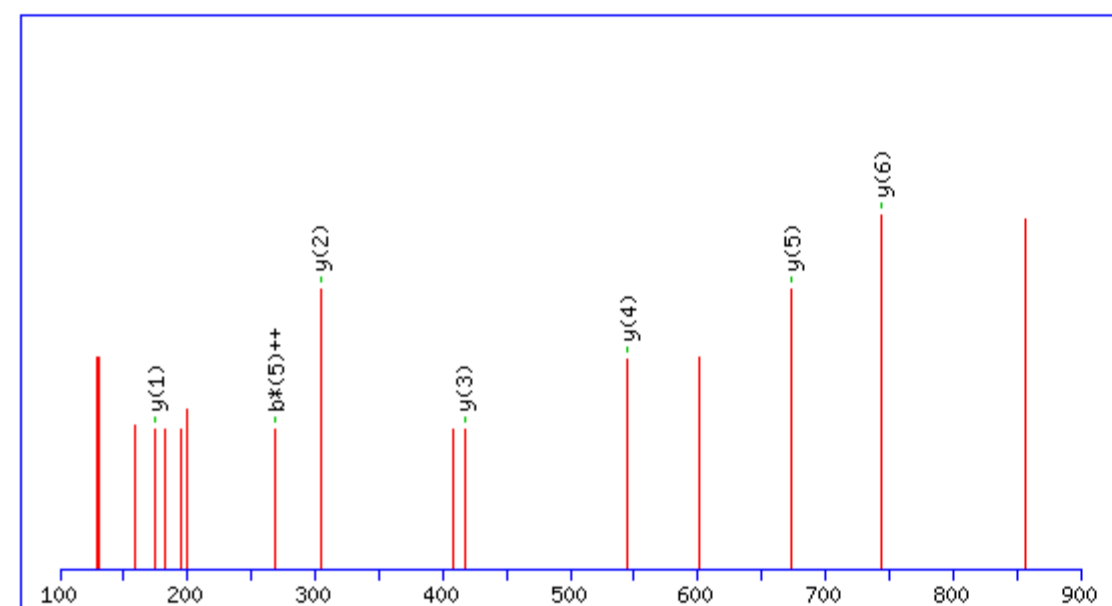

Monoisotopic mass of neutral peptide Mr(calc): 856.476639

Fixed modifications: Propionamide (C) (apply to specified residues or termini only)

Ions Score: 42 Expect: 0.00083

Matches : 7/56 fragment ions using 13 most intense peaks [\(help\)](#)

| # | b          | b <sup>++</sup> | b <sup>*</sup> | b <sup>*++</sup> | b <sup>0</sup> | b <sup>0++</sup> | Seq. | y          | y <sup>++</sup> | y <sup>*</sup> | y <sup>*++</sup> | y <sup>0</sup> | y <sup>0++</sup> | # |
|---|------------|-----------------|----------------|------------------|----------------|------------------|------|------------|-----------------|----------------|------------------|----------------|------------------|---|
| 1 | 114.091340 | 57.549308       |                |                  |                |                  | I    |            |                 |                |                  |                |                  | 7 |
| 2 | 185.128454 | 93.067865       |                |                  |                |                  | A    | 744.399879 | 372.703578      | 727.373330     | 364.190303       | 726.389314     | 363.698295       | 6 |
| 3 | 313.187032 | 157.097154      | 296.160483     | 148.583879       |                |                  | Q    | 673.362765 | 337.185021      | 656.336216     | 328.671746       | 655.352200     | 328.179738       | 5 |
| 4 | 441.245610 | 221.126443      | 424.219061     | 212.613169       |                |                  | Q    | 545.304187 | 273.155732      | 528.277638     | 264.642457       | 527.293622     | 264.150449       | 4 |
| 5 | 554.329674 | 277.668475      | 537.303125     | 269.155201       |                |                  | L    | 417.245609 | 209.126443      | 400.219060     | 200.613168       | 399.235044     | 200.121160       | 3 |
| 6 | 683.372267 | 342.189772      | 666.345718     | 333.676497       | 665.361702     | 333.184489       | E    | 304.161545 | 152.584411      | 287.134996     | 144.071136       | 286.150980     | 143.579128       | 2 |
| 7 |            |                 |                |                  |                |                  | R    | 175.118952 | 88.063114       | 158.092403     | 79.549840        |                |                  | 1 |

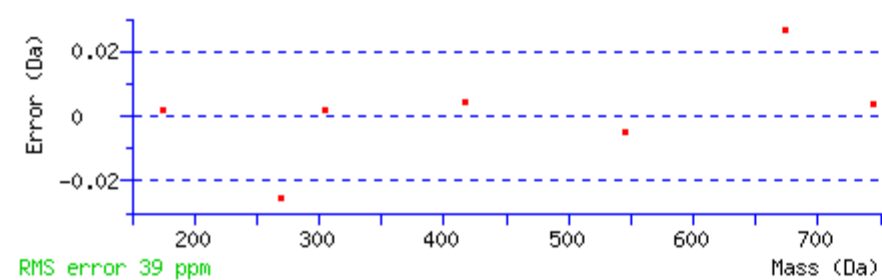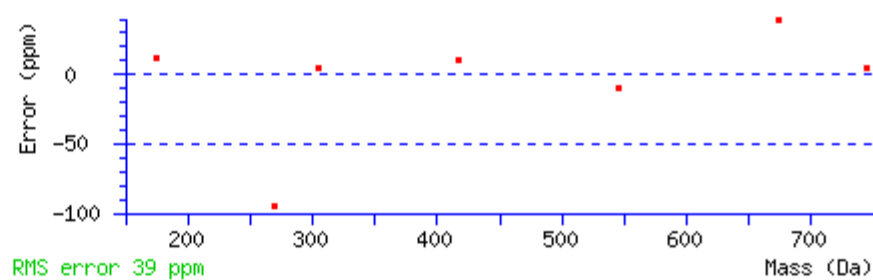

NCBI BLAST search of **IAQQLER**

(Parameters: blastp, nr protein database, expect=20000, no filter, PAM30)

Other BLAST [web gateways](#)

All matches to this query

| Score | Mr(calc):  | Delta     | Sequence                 |
|-------|------------|-----------|--------------------------|
| 42.1  | 856.476639 | -0.005051 | <a href="#">IAQQLER</a>  |
| 27.6  | 856.476639 | -0.005051 | <a href="#">LQAQLER</a>  |
| 15.8  | 856.476639 | -0.005051 | <a href="#">KAPKPER</a>  |
| 13.4  | 856.465408 | 0.006180  | <a href="#">LAKEGDPK</a> |
| 6.3   | 856.476639 | -0.005051 | <a href="#">IAELQQR</a>  |
| 6.3   | 856.476639 | -0.005051 | <a href="#">LAELQQR</a>  |
| 6.3   | 856.476639 | -0.005051 | <a href="#">LAGQLEAR</a> |
| 6.3   | 856.476639 | -0.005051 | <a href="#">LASPNSLR</a> |
| 6.3   | 856.476639 | -0.005051 | <a href="#">KASPLER</a>  |
| 5.9   | 856.476639 | -0.005051 | <a href="#">QAIQELR</a>  |



# Mascot Search Results

## Peptide View

MS/MS Fragmentation of **NVLDSSEDEIEELSK**

Found in **CHIDI\_HUMAN**, Chitinase domain-containing protein 1 OS=Homo sapiens GN=CHID1 PE=1 SV=1

Match to Query 51273: 1618.760308 from(810.387430,2+) rtinseconds(2889) index(39822)

Title: Locus:1.1.1.2425.43

Data file 2011-11-10 - TFD - EP 4-4.mgf

Click mouse within plot area to zoom in by factor of two about that point

Or, Plot from  to  Da

Label all possible matches  Label matches used for scoring

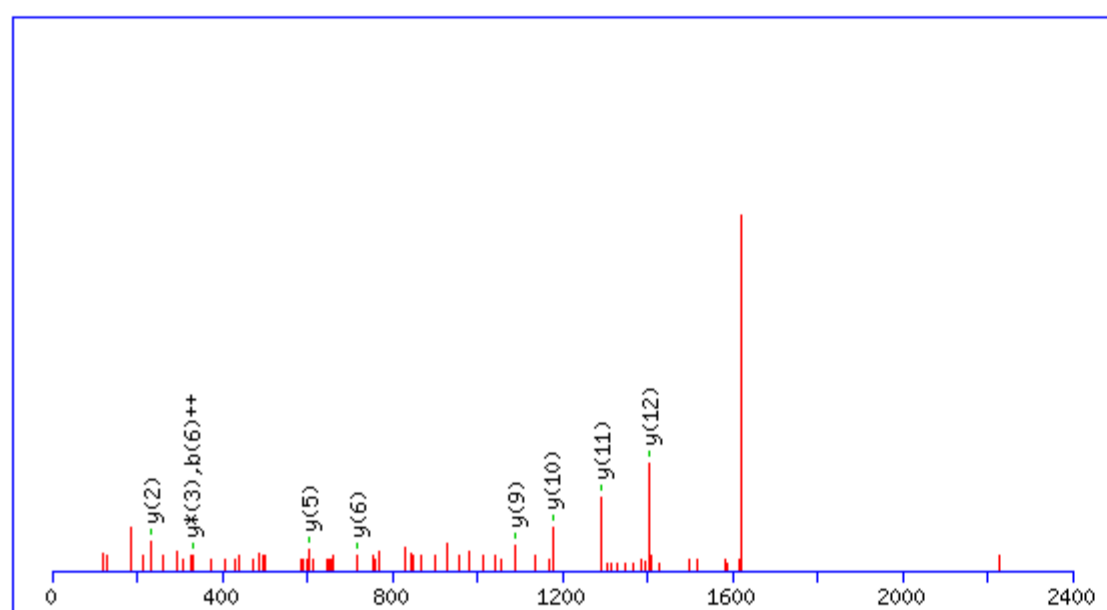

Monoisotopic mass of neutral peptide Mr(calc): 1618.757339

Fixed modifications: Propionamide (C) (apply to specified residues or termini only)

Ions Score: 41 Expect: 0.00051

Matches : 9/148 fragment ions using 15 most intense peaks ([help](#))

| #  | b           | b <sup>++</sup>   | b <sup>*</sup> | b <sup>*++</sup> | b <sup>0</sup> | b <sup>0++</sup> | Seq. | y                  | y <sup>++</sup> | y <sup>*</sup>    | y <sup>*++</sup> | y <sup>0</sup> | y <sup>0++</sup> | #  |
|----|-------------|-------------------|----------------|------------------|----------------|------------------|------|--------------------|-----------------|-------------------|------------------|----------------|------------------|----|
| 1  | 115.050203  | 58.028740         | 98.023654      | 49.515465        |                |                  | N    |                    |                 |                   |                  |                |                  | 14 |
| 2  | 214.118617  | 107.562947        | 197.092068     | 99.049672        |                |                  | V    | 1505.721724        | 753.364500      | 1488.695175       | 744.851226       | 1487.711159    | 744.359218       | 13 |
| 3  | 327.202681  | 164.104978        | 310.176132     | 155.591704       |                |                  | L    | <b>1406.653310</b> | 703.830293      | 1389.626761       | 695.317019       | 1388.642745    | 694.825010       | 12 |
| 4  | 442.229624  | 221.618450        | 425.203075     | 213.105176       | 424.219059     | 212.613168       | D    | <b>1293.569246</b> | 647.288261      | 1276.542697       | 638.774987       | 1275.558681    | 638.282979       | 11 |
| 5  | 529.261652  | 265.134464        | 512.235103     | 256.621190       | 511.251087     | 256.129182       | S    | <b>1178.542303</b> | 589.774790      | 1161.515754       | 581.261515       | 1160.531738    | 580.769507       | 10 |
| 6  | 658.304245  | <b>329.655761</b> | 641.277696     | 321.142486       | 640.293680     | 320.650478       | E    | <b>1091.510275</b> | 546.258775      | 1074.483726       | 537.745501       | 1073.499710    | 537.253493       | 9  |
| 7  | 773.331188  | 387.169232        | 756.304639     | 378.655958       | 755.320623     | 378.163950       | D    | 962.467682         | 481.737479      | 945.441133        | 473.224204       | 944.457117     | 472.732196       | 8  |
| 8  | 902.373781  | 451.690529        | 885.347232     | 443.177254       | 884.363216     | 442.685246       | E    | 847.440739         | 424.224008      | 830.414190        | 415.710733       | 829.430174     | 415.218725       | 7  |
| 9  | 1015.457845 | 508.232561        | 998.431296     | 499.719286       | 997.447280     | 499.227278       | I    | <b>718.398146</b>  | 359.702711      | 701.371597        | 351.189437       | 700.387581     | 350.697429       | 6  |
| 10 | 1144.500438 | 572.753857        | 1127.473889    | 564.240583       | 1126.489873    | 563.748575       | E    | <b>605.314082</b>  | 303.160679      | 588.287533        | 294.647404       | 587.303517     | 294.155396       | 5  |
| 11 | 1273.543031 | 637.275153        | 1256.516482    | 628.761879       | 1255.532466    | 628.269871       | E    | 476.271489         | 238.639382      | 459.244940        | 230.126108       | 458.260924     | 229.634100       | 4  |
| 12 | 1386.627095 | 693.817185        | 1369.600546    | 685.303911       | 1368.616530    | 684.811903       | L    | 347.228896         | 174.118086      | <b>330.202347</b> | 165.604811       | 329.218331     | 165.112803       | 3  |
| 13 | 1473.659123 | 737.333199        | 1456.632574    | 728.819925       | 1455.648558    | 728.327917       | S    | <b>234.144832</b>  | 117.576054      | 217.118283        | 109.062780       | 216.134267     | 108.570772       | 2  |
| 14 |             |                   |                |                  |                |                  | K    | 147.112804         | 74.060040       | 130.086255        | 65.546765        |                |                  | 1  |

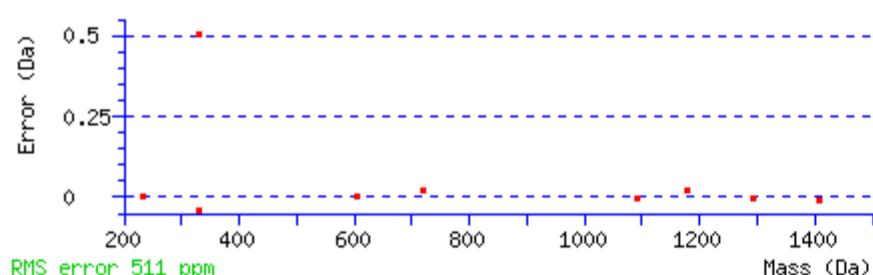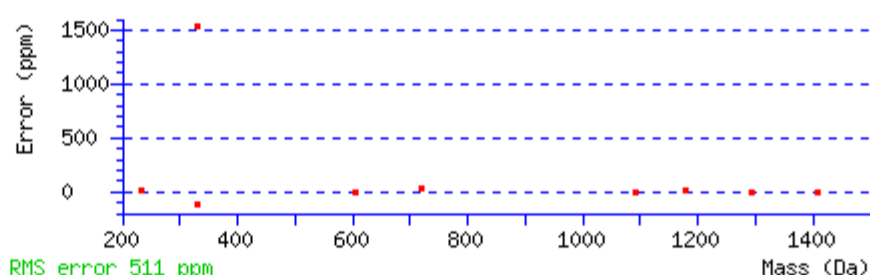

NCBI BLAST search of [NVLDSSEDEIEELSK](#)

(Parameters: blastp, nr protein database, expect=20000, no filter, PAM30)

Other BLAST [web gateways](#)

All matches to this query

| Score | Mr(calc):   | Delta    | Sequence                        |
|-------|-------------|----------|---------------------------------|
| 41.1  | 1618.757339 | 0.002969 | <a href="#">NVLDSSEDEIEELSK</a> |

Mascot: <http://www.matrixscience.com/>

# MASCOT Search Results

## Peptide View

MS/MS Fragmentation of **FLDGDELTLADCNLLPK**

Found in **CLIC5\_HUMAN**, Chloride intracellular channel protein 5 OS=Homo sapiens GN=CLIC5 PE=1 SV=3

Match to Query 64741: 1946.966708 from(974.490630,2+) rtinseconds(3609) index(52384)

Title: Locus:1.1.1.2785.48

Data file 2011-11-12 - TFD - EP 5-4.mgf

Click mouse within plot area to zoom in by factor of two about that point

Or, Plot from  to  Da

Label all possible matches  Label matches used for scoring

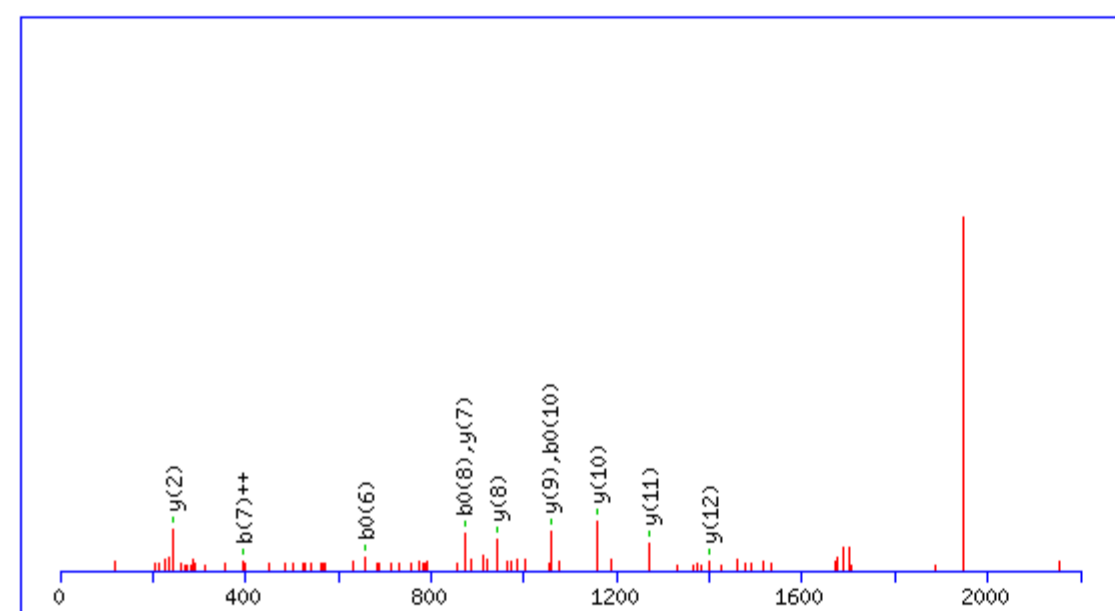

Monoisotopic mass of neutral peptide Mr(calc): 1946.965912

Fixed modifications: Propionamide (C) (apply to specified residues or termini only)

Ions Score: 32 Expect: 0.0047

Matches: 11/152 fragment ions using 17 most intense peaks [\(help\)](#)

| #  | b           | b <sup>++</sup> | b <sup>*</sup> | b <sup>*++</sup> | b <sup>0</sup> | b <sup>0++</sup> | Seq. | y           | y <sup>++</sup> | y <sup>*</sup> | y <sup>*++</sup> | y <sup>0</sup> | y <sup>0++</sup> | #  |
|----|-------------|-----------------|----------------|------------------|----------------|------------------|------|-------------|-----------------|----------------|------------------|----------------|------------------|----|
| 1  | 148.075690  | 74.541483       |                |                  |                |                  | F    |             |                 |                |                  |                |                  | 17 |
| 2  | 261.159754  | 131.083515      |                |                  |                |                  | L    | 1800.904793 | 900.956034      | 1783.878244    | 892.442760       | 1782.894228    | 891.950752       | 16 |
| 3  | 376.186697  | 188.596986      |                |                  | 358.176132     | 179.591704       | D    | 1687.820729 | 844.414003      | 1670.794180    | 835.900728       | 1669.810164    | 835.408720       | 15 |
| 4  | 433.208161  | 217.107718      |                |                  | 415.197596     | 208.102436       | G    | 1572.793786 | 786.900531      | 1555.767237    | 778.387257       | 1554.783221    | 777.895248       | 14 |
| 5  | 548.235104  | 274.621190      |                |                  | 530.224539     | 265.615907       | D    | 1515.772322 | 758.389799      | 1498.745773    | 749.876525       | 1497.761757    | 749.384517       | 13 |
| 6  | 677.277697  | 339.142487      |                |                  | 659.267132     | 330.137204       | E    | 1400.745379 | 700.876328      | 1383.718830    | 692.363053       | 1382.734814    | 691.871045       | 12 |
| 7  | 790.361761  | 395.684519      |                |                  | 772.351196     | 386.679236       | L    | 1271.702786 | 636.355031      | 1254.676237    | 627.841757       | 1253.692221    | 627.349749       | 11 |
| 8  | 891.409440  | 446.208358      |                |                  | 873.398875     | 437.203076       | T    | 1158.618722 | 579.812999      | 1141.592173    | 571.299725       | 1140.608157    | 570.807716       | 10 |
| 9  | 1004.493504 | 502.750390      |                |                  | 986.482939     | 493.745108       | L    | 1057.571043 | 529.289160      | 1040.544494    | 520.775885       | 1039.560478    | 520.283877       | 9  |
| 10 | 1075.530618 | 538.268947      |                |                  | 1057.520053    | 529.263665       | A    | 944.486979  | 472.747128      | 927.460430     | 464.233853       | 926.476414     | 463.741845       | 8  |
| 11 | 1190.557561 | 595.782419      |                |                  | 1172.546996    | 586.777136       | D    | 873.449865  | 437.228571      | 856.423316     | 428.715296       | 855.439300     | 428.223288       | 7  |
| 12 | 1364.603860 | 682.805568      |                |                  | 1346.593295    | 673.800286       | C    | 758.422922  | 379.715099      | 741.396373     | 371.201824       |                |                  | 6  |
| 13 | 1478.646787 | 739.827032      | 1461.620238    | 731.313757       | 1460.636222    | 730.821749       | N    | 584.376623  | 292.691949      | 567.350074     | 284.178675       |                |                  | 5  |
| 14 | 1591.730851 | 796.369064      | 1574.704302    | 787.855789       | 1573.720286    | 787.363781       | L    | 470.333696  | 235.670486      | 453.307147     | 227.157211       |                |                  | 4  |
| 15 | 1704.814915 | 852.911095      | 1687.788366    | 844.397821       | 1686.804350    | 843.905813       | L    | 357.249632  | 179.128454      | 340.223083     | 170.615179       |                |                  | 3  |
| 16 | 1801.867679 | 901.437478      | 1784.841130    | 892.924203       | 1783.857114    | 892.432195       | P    | 244.165568  | 122.586422      | 227.139019     | 114.073148       |                |                  | 2  |
| 17 |             |                 |                |                  |                |                  | K    | 147.112804  | 74.060040       | 130.086255     | 65.546765        |                |                  | 1  |

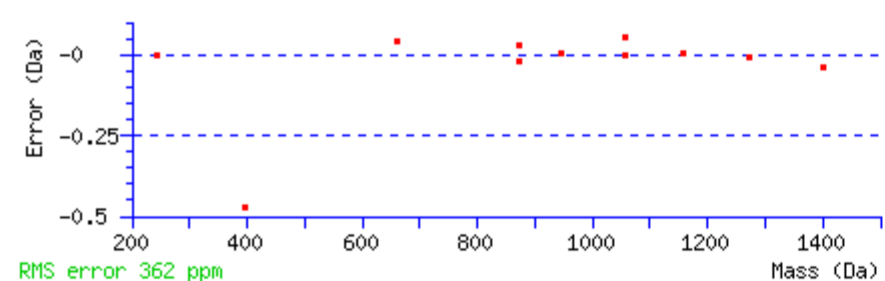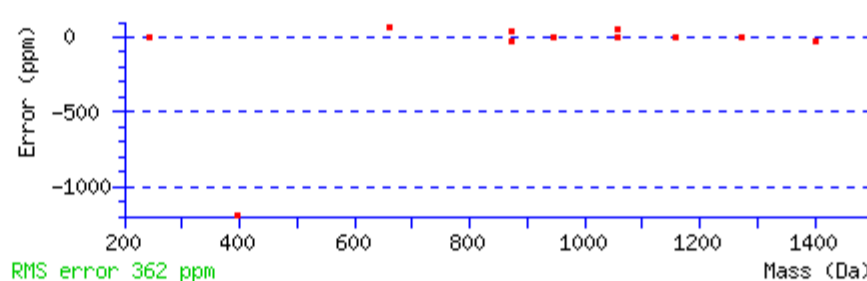

NCBI BLAST search of **FLDGDELTLADCNLLPK**

(Parameters: blastp, nr protein database, expect=20000, no filter, PAM30)

Other BLAST [web gateways](#)

### All matches to this query

| Score | Mr(calc):   | Delta     | Sequence                           |
|-------|-------------|-----------|------------------------------------|
| 32.2  | 1946.965912 | 0.000796  | <a href="#">FLDGDELTLADCNLLPK</a>  |
| 7.1   | 1946.985886 | -0.019178 | <a href="#">VLWLFQMDLNKMTISR</a>   |
| 2.1   | 1946.969330 | -0.002622 | <a href="#">DPKTLPPMPGVMVGDIGK</a> |

# **MASCOT** Mascot Search Results

## Peptide View

MS/MS Fragmentation of **EVRESIR**

Found in **CP46A\_HUMAN**, Cholesterol 24-hydroxylase OS=Homo sapiens GN=CYP46A1 PE=1 SV=1

Match to Query 5918: 887.485488 from(444.750020,2+) rtinseconds(1004) index(3998)

Title: Locus:1.1.1.1794.17

Data file 2011-11-10 - TFD - EP 3-3.mgf

Click mouse within plot area to zoom in by factor of two about that point

Or, Plot from  to  Da

Label all possible matches  Label matches used for scoring

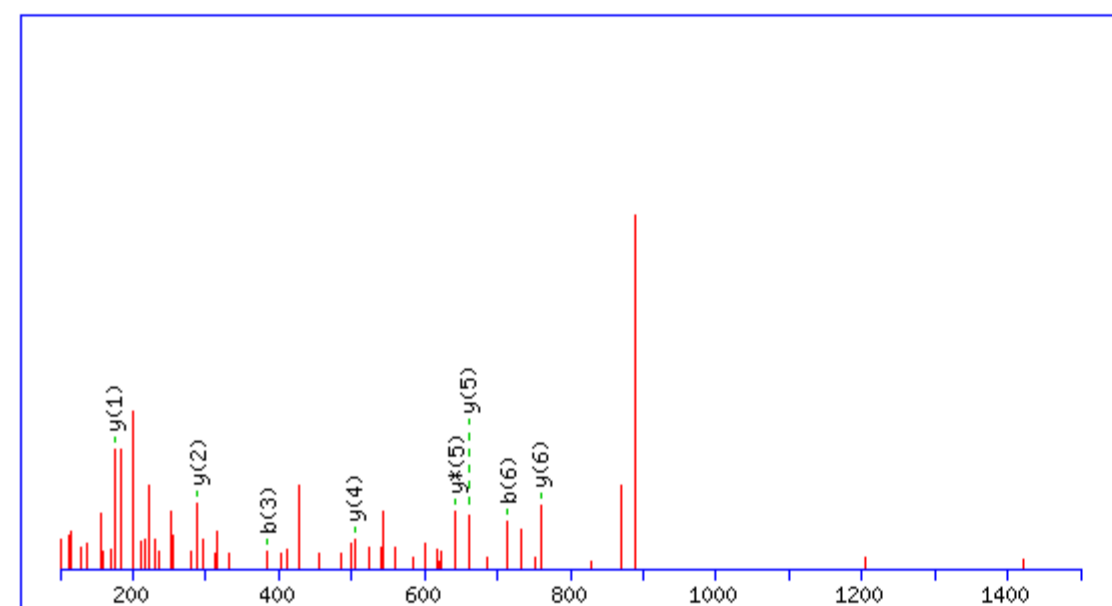

Monoisotopic mass of neutral peptide Mr(calc): 887.482452

Fixed modifications: Propionamide (C) (apply to specified residues or termini only)

Ions Score: 34 Expect: 0.0062

Matches : 8/64 fragment ions using 16 most intense peaks [\(help\)](#)

| # | b          | b <sup>++</sup> | b <sup>*</sup> | b <sup>*++</sup> | b <sup>0</sup> | b <sup>0++</sup> | Seq. | y          | y <sup>++</sup> | y <sup>*</sup> | y <sup>*++</sup> | y <sup>0</sup> | y <sup>0++</sup> | # |
|---|------------|-----------------|----------------|------------------|----------------|------------------|------|------------|-----------------|----------------|------------------|----------------|------------------|---|
| 1 | 130.049869 | 65.528572       |                |                  | 112.039304     | 56.523290        | E    |            |                 |                |                  |                |                  | 7 |
| 2 | 229.118283 | 115.062780      |                |                  | 211.107718     | 106.057497       | V    | 759.447162 | 380.227219      | 742.420613     | 371.713945       | 741.436597     | 371.221937       | 6 |
| 3 | 385.219394 | 193.113335      | 368.192845     | 184.600061       | 367.208829     | 184.108053       | R    | 660.378748 | 330.693012      | 643.352199     | 322.179738       | 642.368183     | 321.687730       | 5 |
| 4 | 514.261987 | 257.634632      | 497.235438     | 249.121357       | 496.251422     | 248.629349       | E    | 504.277637 | 252.642456      | 487.251088     | 244.129182       | 486.267072     | 243.637174       | 4 |
| 5 | 601.294015 | 301.150646      | 584.267466     | 292.637371       | 583.283450     | 292.145363       | S    | 375.235044 | 188.121160      | 358.208495     | 179.607885       | 357.224479     | 179.115877       | 3 |
| 6 | 714.378079 | 357.692678      | 697.351530     | 349.179403       | 696.367514     | 348.687395       | I    | 288.203016 | 144.605146      | 271.176467     | 136.091871       |                |                  | 2 |
| 7 |            |                 |                |                  |                |                  | R    | 175.118952 | 88.063114       | 158.092403     | 79.549839        |                |                  | 1 |

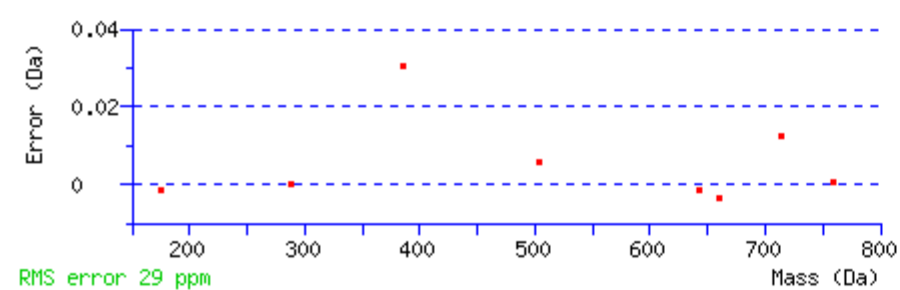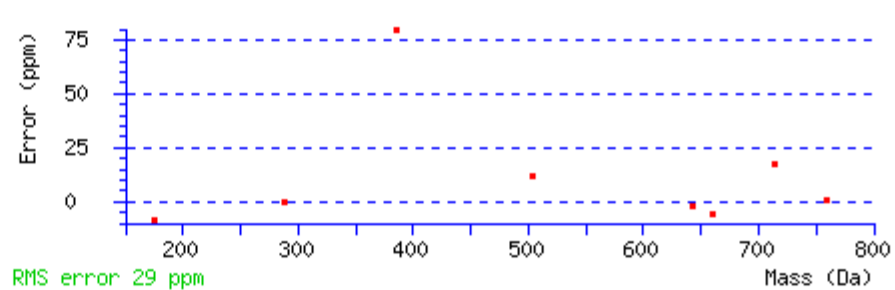

NCBI BLAST search of **EVRESIR**

(Parameters: blastp, nr protein database, expect=20000, no filter, PAM30)

Other BLAST [web gateways](#)

All matches to this query

| Score | Mr(calc):  | Delta     | Sequence                 |
|-------|------------|-----------|--------------------------|
| 33.7  | 887.482452 | 0.003036  | <a href="#">EVRESIR</a>  |
| 21.1  | 887.489853 | -0.004365 | <a href="#">DIKMPLR</a>  |
| 20.1  | 887.493683 | -0.008195 | <a href="#">SSSKPRAR</a> |
| 18.6  | 887.486481 | -0.000993 | <a href="#">IEFNPIR</a>  |
| 15.1  | 887.493683 | -0.008195 | <a href="#">RASATINR</a> |
| 15.0  | 887.489838 | -0.004350 | <a href="#">CIELIAR</a>  |
| 14.3  | 887.482452 | 0.003036  | <a href="#">RDLESLR</a>  |
| 12.9  | 887.482452 | 0.003036  | <a href="#">RVEESLR</a>  |
| 12.7  | 887.482452 | 0.003036  | <a href="#">SLSLQANR</a> |
| 11.4  | 887.482452 | 0.003036  | <a href="#">DRISELR</a>  |

Mascot: <http://www.matrixscience.com/>

# {MATRIX} SCIENCE Mascot Search Results

## Peptide View

MS/MS Fragmentation of **LPGPSDTPILPQ**

Found in **CGB2\_HUMAN**, Choriogonadotropin subunit beta variant 2 OS=Homo sapiens GN=CGB2 PE=2 SV=4

Match to Query 32717: 1249.643668 from(625.829110,2+) rtinseconds(1747) index(18287)

Title: Locus:1.1.1.1985.48

Data file 2011-11-12 - TFD - EP 6-1.mgf

Click mouse within plot area to zoom in by factor of two about that point

Or,   to  Da

Label all possible matches  Label matches used for scoring

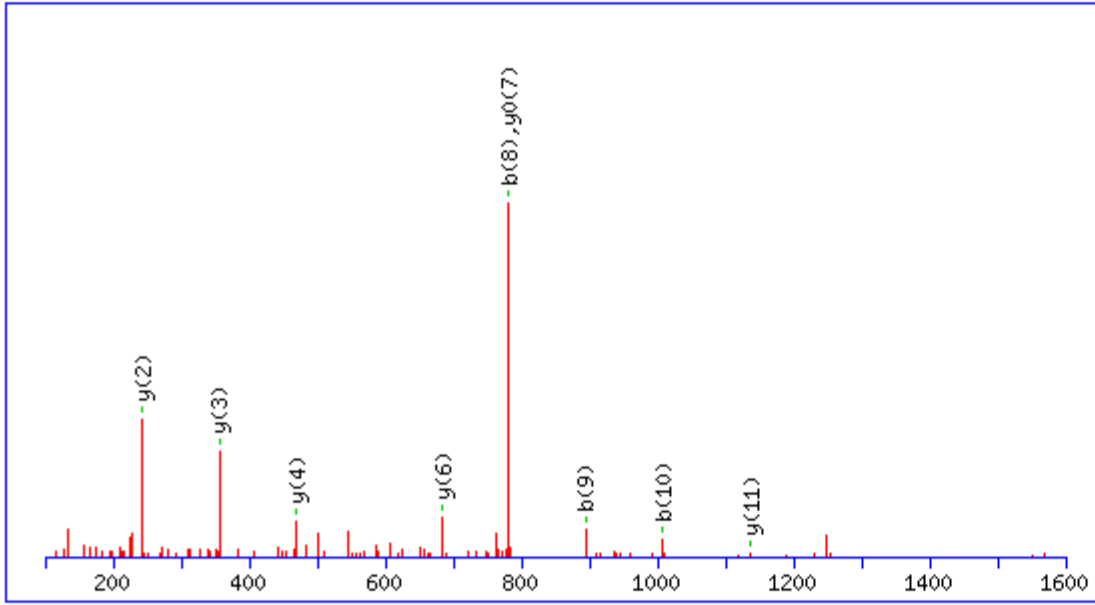

Monoisotopic mass of neutral peptide Mr(calc): 1249.655426

Fixed modifications: Propionamide (C) (apply to specified residues or termini only)

Variable modifications:

P8 : Oxidation (P)

Ions Score: 37 Expect: 0.0023

Matches : 9/92 fragment ions using 11 most intense peaks ([help](#))

| #  | b                  | b <sup>++</sup> | b <sup>0</sup> | b <sup>0++</sup> | Seq. | y                  | y <sup>++</sup> | y <sup>*</sup> | y <sup>***</sup> | y <sup>0</sup>    | y <sup>0++</sup> | #  |
|----|--------------------|-----------------|----------------|------------------|------|--------------------|-----------------|----------------|------------------|-------------------|------------------|----|
| 1  | 114.091340         | 57.549308       |                |                  | L    |                    |                 |                |                  |                   |                  | 12 |
| 2  | 211.144104         | 106.075690      |                |                  | P    | <b>1137.578632</b> | 569.292954      | 1120.552083    | 560.779680       | 1119.568067       | 560.287672       | 11 |
| 3  | 268.165568         | 134.586422      |                |                  | G    | 1040.525868        | 520.766572      | 1023.499319    | 512.253298       | 1022.515303       | 511.761290       | 10 |
| 4  | 365.218332         | 183.112804      |                |                  | P    | 983.504404         | 492.255840      | 966.477855     | 483.742566       | 965.493839        | 483.250558       | 9  |
| 5  | 452.250360         | 226.628818      | 434.239795     | 217.623535       | S    | 886.451640         | 443.729458      | 869.425091     | 435.216184       | 868.441075        | 434.724176       | 8  |
| 6  | 567.277303         | 284.142290      | 549.266738     | 275.137007       | D    | 799.419612         | 400.213444      | 782.393063     | 391.700170       | <b>781.409047</b> | 391.208162       | 7  |
| 7  | 668.324982         | 334.666129      | 650.314417     | 325.660846       | T    | <b>684.392669</b>  | 342.699973      | 667.366120     | 334.186698       | 666.382104        | 333.694690       | 6  |
| 8  | <b>781.372661</b>  | 391.189969      | 763.362096     | 382.184686       | P    | 583.344990         | 292.176133      | 566.318441     | 283.662859       |                   |                  | 5  |
| 9  | <b>894.456725</b>  | 447.732001      | 876.446160     | 438.726718       | I    | <b>470.297311</b>  | 235.652294      | 453.270762     | 227.139019       |                   |                  | 4  |
| 10 | <b>1007.540789</b> | 504.274033      | 989.530224     | 495.268750       | L    | <b>357.213247</b>  | 179.110262      | 340.186698     | 170.596987       |                   |                  | 3  |
| 11 | 1104.593553        | 552.800414      | 1086.582988    | 543.795132       | P    | <b>244.129183</b>  | 122.568230      | 227.102634     | 114.054955       |                   |                  | 2  |
| 12 |                    |                 |                |                  | Q    | 147.076419         | 74.041848       | 130.049870     | 65.528573        |                   |                  | 1  |

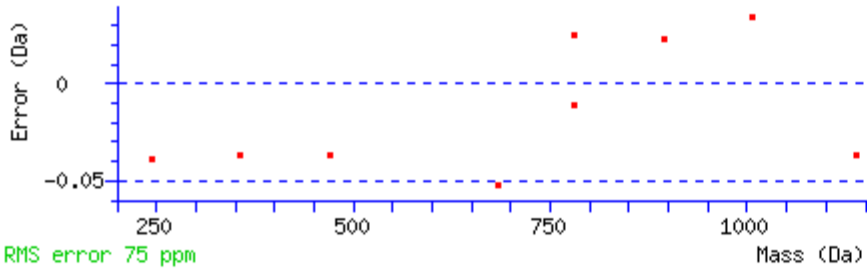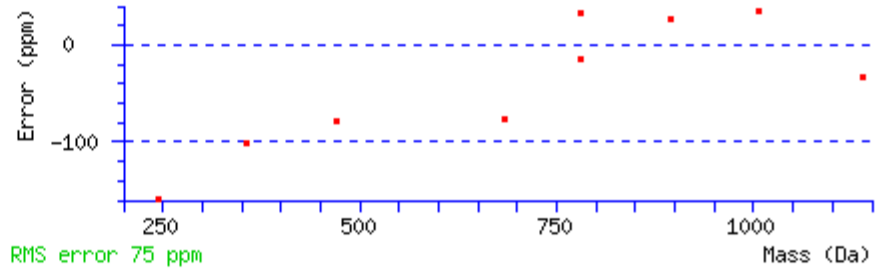

NCBI BLAST search of [LPGPSDTPILPQ](#)

(Parameters: blastp, nr protein database, expect=20000, no filter, PAM30)

Other BLAST [web gateways](#)

All matches to this query

| Score | Mr(calc):   | Delta     | Sequence                              |
|-------|-------------|-----------|---------------------------------------|
| 36.9  | 1249.655426 | -0.011758 | <a href="#">LPGPSDTPILPQ</a>          |
| 33.7  | 1249.641479 | 0.002189  | <a href="#">DQLLPPSPNNR</a>           |
| 32.5  | 1249.655426 | -0.011758 | <a href="#">LPGPSDTPILPQ</a>          |
| 32.5  | 1249.655426 | -0.011758 | <a href="#">LPGPSDTPILPQ</a>          |
| 12.5  | 1249.652756 | -0.009088 | <a href="#">KGP GP GG P GG AG VAR</a> |
| 7.3   | 1249.652756 | -0.009088 | <a href="#">KGP GP GG P GG AG VAR</a> |
| 6.3   | 1249.652710 | -0.009042 | <a href="#">LPRSEKPHDR</a>            |
| 3.1   | 1249.652710 | -0.009042 | <a href="#">LSRGHEELPGR</a>           |
| 1.9   | 1249.655426 | -0.011758 | <a href="#">LPGPSDTPILPQ</a>          |
| 1.6   | 1249.645508 | -0.001840 | <a href="#">LENSTFFHKK</a>            |

Mascot: <http://www.matrixscience.com/>

**Peptide View**

MS/MS Fragmentation of **ASMQQQQQLASAR**

Found in **CHTOP\_HUMAN**, Chromatin target of PRMT1 protein OS=Homo sapiens GN=CHTOP PE=1 SV=2

Match to Query 43529: 1461.693908 from(731.854230,2+) rtinseconds(1014) index(2783)

Title: Locus:1.1.1.1700.37

Data file 2011-11-10 - TFD - EP 4-5.mgf

Click mouse within plot area to zoom in by factor of two about that point

Or, Plot from  to  Da

Label all possible matches  Label matches used for scoring

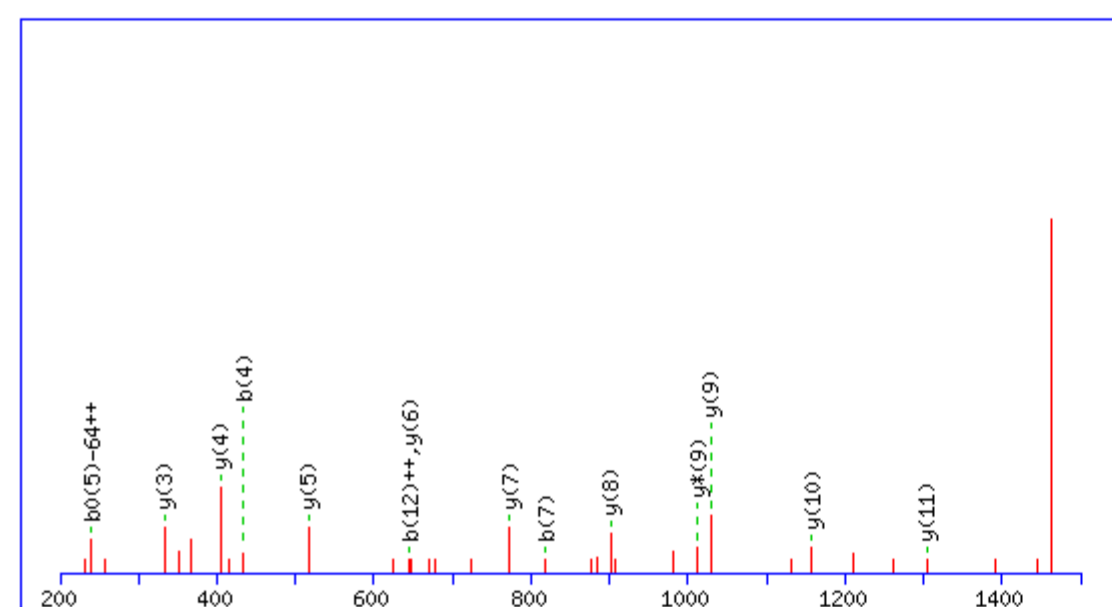

Monoisotopic mass of neutral peptide Mr(calc): 1461.699402

Fixed modifications: Propionamide (C) (apply to specified residues or termini only)

Variable modifications:

M3 : Oxidation (M), with neutral losses 0.000000 (shown in table), 63.998285

Ions Score: 68 Expect: 1.6e-006

Matches : 14/202 fragment ions using 21 most intense peaks ([help](#))

| #  | b                 | b <sup>++</sup>   | b <sup>*</sup> | b <sup>*++</sup> | b <sup>0</sup> | b <sup>0++</sup> | Seq. | y                  | y <sup>++</sup> | y <sup>*</sup>     | y <sup>*++</sup> | y <sup>0</sup> | y <sup>0++</sup> | #  |
|----|-------------------|-------------------|----------------|------------------|----------------|------------------|------|--------------------|-----------------|--------------------|------------------|----------------|------------------|----|
| 1  | 72.044390         | 36.525833         |                |                  |                |                  | A    |                    |                 |                    |                  |                |                  | 13 |
| 2  | 159.076418        | 80.041847         |                |                  | 141.065853     | 71.036564        | S    | 1391.669590        | 696.338433      | 1374.643041        | 687.825159       | 1373.659025    | 687.333151       | 12 |
| 3  | 306.111818        | 153.559547        |                |                  | 288.101253     | 144.554264       | M    | <b>1304.637562</b> | 652.822419      | 1287.611013        | 644.309145       | 1286.626997    | 643.817137       | 11 |
| 4  | <b>434.170396</b> | 217.588836        | 417.143847     | 209.075561       | 416.159831     | 208.583553       | Q    | <b>1157.602162</b> | 579.304719      | 1140.575613        | 570.791445       | 1139.591597    | 570.299437       | 10 |
| 5  | 562.228974        | 281.618125        | 545.202425     | 273.104851       | 544.218409     | 272.612843       | Q    | <b>1029.543584</b> | 515.275430      | <b>1012.517035</b> | 506.762156       | 1011.533019    | 506.270148       | 9  |
| 6  | 690.287552        | 345.647414        | 673.261003     | 337.134140       | 672.276987     | 336.642132       | Q    | <b>901.485006</b>  | 451.246141      | 884.458457         | 442.732867       | 883.474441     | 442.240859       | 8  |
| 7  | <b>818.346130</b> | 409.676703        | 801.319581     | 401.163429       | 800.335565     | 400.671421       | Q    | <b>773.426428</b>  | 387.216852      | 756.399879         | 378.703578       | 755.415863     | 378.211570       | 7  |
| 8  | 946.404708        | 473.705992        | 929.378159     | 465.192718       | 928.394143     | 464.700710       | Q    | <b>645.367850</b>  | 323.187563      | 628.341301         | 314.674289       | 627.357285     | 314.182281       | 6  |
| 9  | 1059.488772       | 530.248024        | 1042.462223    | 521.734750       | 1041.478207    | 521.242742       | L    | <b>517.309272</b>  | 259.158274      | 500.282723         | 250.645000       | 499.298707     | 250.152992       | 5  |
| 10 | 1130.525886       | 565.766581        | 1113.499337    | 557.253307       | 1112.515321    | 556.761299       | A    | <b>404.225208</b>  | 202.616242      | 387.198659         | 194.102967       | 386.214643     | 193.610959       | 4  |
| 11 | 1217.557914       | 609.282595        | 1200.531365    | 600.769321       | 1199.547349    | 600.277313       | S    | <b>333.188094</b>  | 167.097685      | 316.161545         | 158.584410       | 315.177529     | 158.092402       | 3  |
| 12 | 1288.595028       | <b>644.801152</b> | 1271.568479    | 636.287878       | 1270.584463    | 635.795870       | A    | 246.156066         | 123.581671      | 229.129517         | 115.068396       |                |                  | 2  |
| 13 |                   |                   |                |                  |                |                  | R    | 175.118952         | 88.063114       | 158.092403         | 79.549839        |                |                  | 1  |

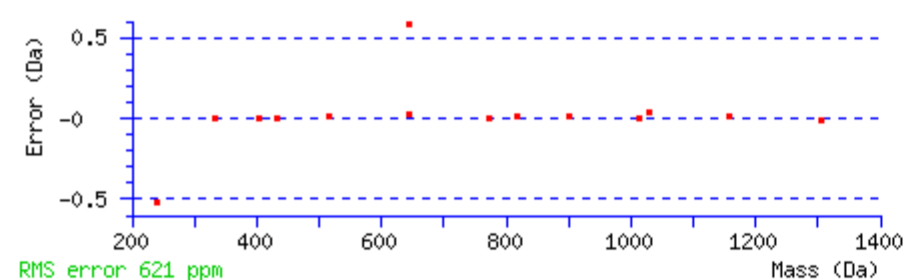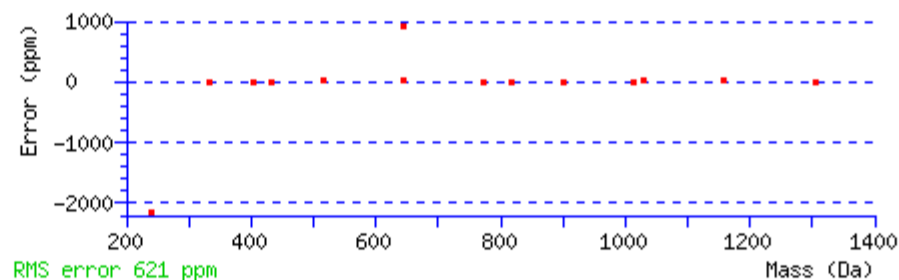

NCBI BLAST search of [ASMQQQQQLASAR](#)

(Parameters: blastp, nr protein database, expect=20000, no filter, PAM30)

Other BLAST [web gateways](#)

All matches to this query

| Score | Mr(calc):   | Delta     | Sequence                      |
|-------|-------------|-----------|-------------------------------|
| 67.7  | 1461.699402 | -0.005494 | <a href="#">ASMQQQQQLASAR</a> |
| 5.9   | 1461.696045 | -0.002137 | <a href="#">AFSQSSSLTNHQR</a> |

# MASCOT SCIENCE Mascot Search Results

## Peptide View

MS/MS Fragmentation of **IIGATDSSGELMFLMK**

Found in **CBX1\_HUMAN**, Chromobox protein homolog 1 OS=Homo sapiens GN=CBX1 PE=1 SV=1

Match to Query 51983: 1743.831608 from(872.923080,2+) rtinseconds(2925) index(38849)

Title: Locus:1.1.1.2403.50

Data file 2011-11-12 - TFD - EP 6-5.mgf

Click mouse within plot area to zoom in by factor of two about that point

Or,   to  Da

Label all possible matches  Label matches used for scoring

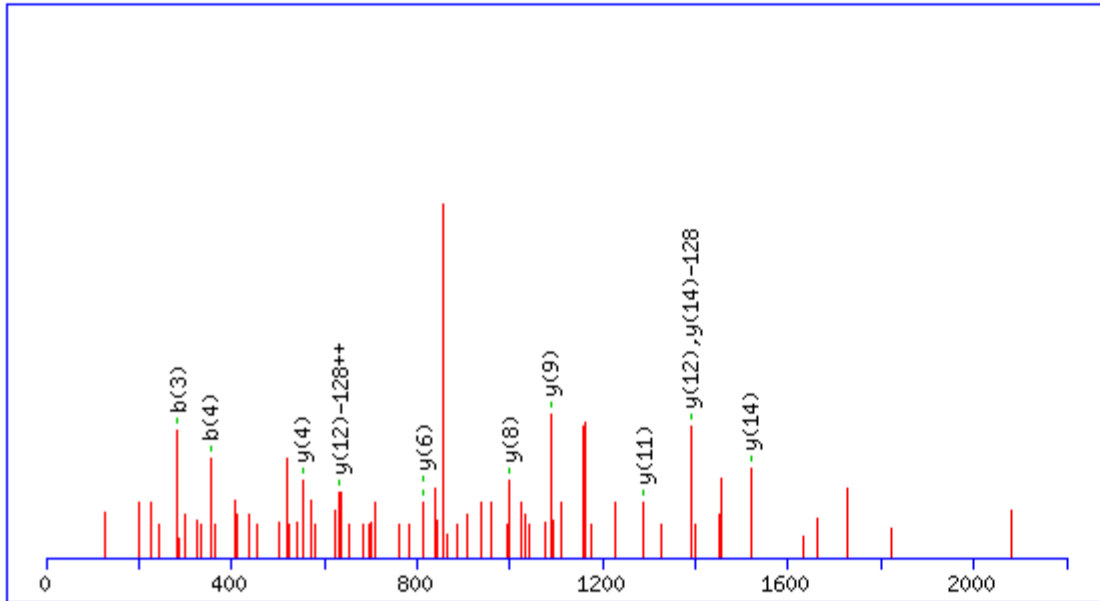

Monoisotopic mass of neutral peptide Mr(calc): 1743.842300

Fixed modifications: Propionamide (C) (apply to specified residues or termini only)

Variable modifications:

M12 : Oxidation (M), with neutral losses 0.000000 (shown in table), 63.998285

M15 : Oxidation (M), with neutral losses 0.000000 (shown in table), 63.998285

Ions Score: 48 Expect: 0.00017

Matches : 11/220 fragment ions using 15 most intense peaks [\(help\)](#)

| #  | b                 | b <sup>++</sup> | b <sup>0</sup> | b <sup>0++</sup> | Seq. | y                  | y <sup>++</sup> | y <sup>+</sup> | y <sup>++</sup> | y <sup>0</sup> | y <sup>0++</sup> | #  |
|----|-------------------|-----------------|----------------|------------------|------|--------------------|-----------------|----------------|-----------------|----------------|------------------|----|
| 1  | 114.091340        | 57.549308       |                |                  | I    |                    |                 |                |                 |                |                  | 16 |
| 2  | 227.175404        | 114.091340      |                |                  | I    | 1631.765523        | 816.386400      | 1614.738974    | 807.873125      | 1613.754958    | 807.381117       | 15 |
| 3  | <b>284.196868</b> | 142.602072      |                |                  | G    | <b>1518.681459</b> | 759.844367      | 1501.654910    | 751.331093      | 1500.670894    | 750.839085       | 14 |
| 4  | <b>355.233982</b> | 178.120629      |                |                  | A    | 1461.659995        | 731.333636      | 1444.633446    | 722.820361      | 1443.649430    | 722.328353       | 13 |
| 5  | 456.281661        | 228.644469      | 438.271096     | 219.639186       | T    | <b>1390.622881</b> | 695.815079      | 1373.596332    | 687.301804      | 1372.612316    | 686.809796       | 12 |
| 6  | 571.308604        | 286.157940      | 553.298039     | 277.152658       | D    | <b>1289.575202</b> | 645.291239      | 1272.548653    | 636.777964      | 1271.564637    | 636.285956       | 11 |
| 7  | 658.340632        | 329.673954      | 640.330067     | 320.668672       | S    | 1174.548259        | 587.777767      | 1157.521710    | 579.264493      | 1156.537694    | 578.772485       | 10 |
| 8  | 745.372660        | 373.189968      | 727.362095     | 364.184686       | S    | <b>1087.516231</b> | 544.261753      | 1070.489682    | 535.748479      | 1069.505666    | 535.256471       | 9  |
| 9  | 802.394124        | 401.700700      | 784.383559     | 392.695418       | G    | <b>1000.484203</b> | 500.745740      | 983.457654     | 492.232465      | 982.473638     | 491.740457       | 8  |
| 10 | 931.436717        | 466.221997      | 913.426152     | 457.216714       | E    | 943.462739         | 472.235007      | 926.436190     | 463.721733      | 925.452174     | 463.229725       | 7  |
| 11 | 1044.520781       | 522.764028      | 1026.510216    | 513.758746       | L    | <b>814.420146</b>  | 407.713711      | 797.393597     | 399.200436      |                |                  | 6  |
| 12 | 1191.556181       | 596.281728      | 1173.545616    | 587.276446       | M    | 701.336082         | 351.171679      | 684.309533     | 342.658405      |                |                  | 5  |
| 13 | 1338.624595       | 669.815936      | 1320.614030    | 660.810653       | F    | <b>554.300682</b>  | 277.653979      | 537.274133     | 269.140705      |                |                  | 4  |
| 14 | 1451.708659       | 726.357967      | 1433.698094    | 717.352685       | L    | 407.232268         | 204.119772      | 390.205719     | 195.606497      |                |                  | 3  |
| 15 | 1598.744059       | 799.875667      | 1580.733494    | 790.870385       | M    | 294.148204         | 147.577740      | 277.121655     | 139.064465      |                |                  | 2  |
| 16 |                   |                 |                |                  | K    | 147.112804         | 74.060040       | 130.086255     | 65.546765       |                |                  | 1  |

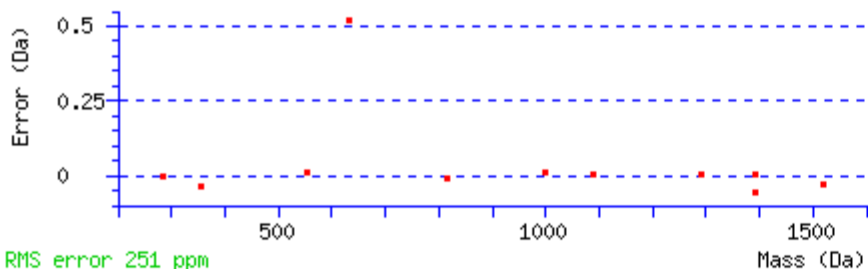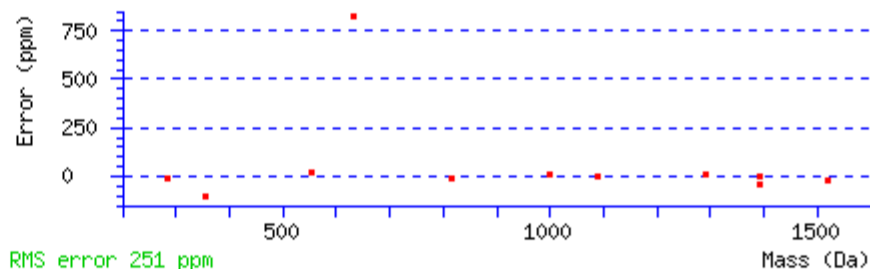

NCBI BLAST search of **IIGATDSSGELMFLMK**

(Parameters: blastp, nr protein database, expect=20000, no filter, PAM30)

Other BLAST [web gateways](#)

All matches to this query

| Score | Mr(calc):   | Delta     | Sequence                         |
|-------|-------------|-----------|----------------------------------|
| 48.2  | 1743.842300 | -0.010692 | <a href="#">IIGATDSSGELMFLMK</a> |

Mascot: <http://www.matrixscience.com/>

# MASCOT SCIENCE Mascot Search Results

## Peptide View

MS/MS Fragmentation of **VSGLAGSIYR**

Found in **JIP3\_HUMAN**, C-Jun-amino-terminal kinase-interacting protein 3 OS=Homo sapiens GN=MAPK8IP3 PE=1 SV=3

Match to Query 290591: 1021.553968 from(511.784260,2+) rtinseconds(2026) index(916344)

Title: Locus:1.1.1.1172.20

Data file C:\Program Files (x86)\Matrix Science\Mascot Daemon\mgf3 TFD - Epitel - R2\mascot\_daemon\_merge.mgf

Click mouse within plot area to zoom in by factor of two about that point

Or, Plot from  to  Da

Label all possible matches  Label matches used for scoring

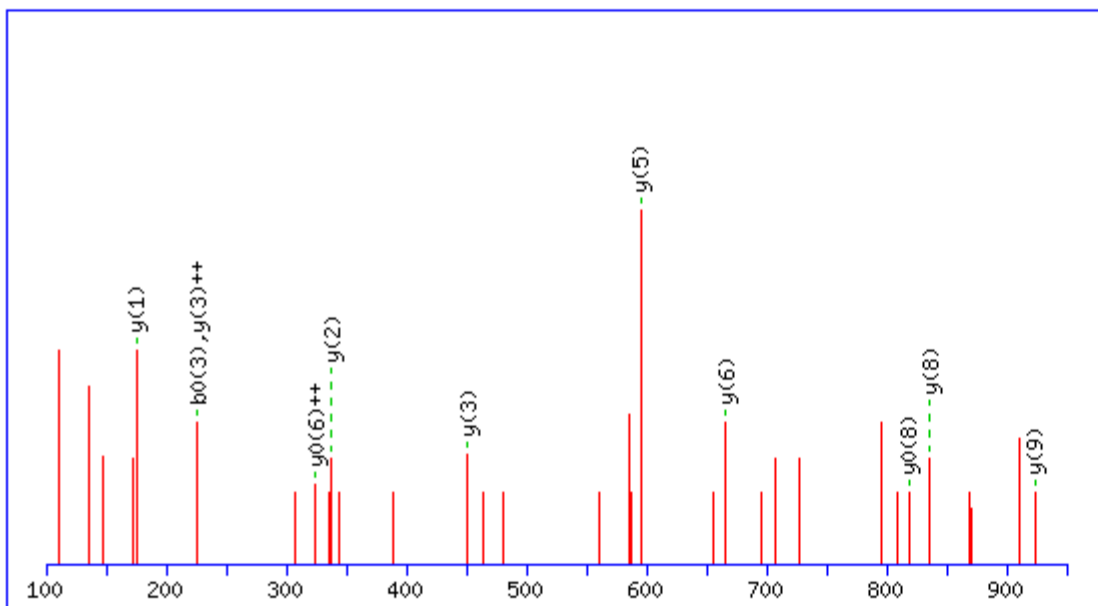

Monoisotopic mass of neutral peptide Mr(calc): 1021.555634

Fixed modifications: Carbamidomethyl (C) (apply to specified residues or termini only)

Ions Score: 47 Expect: 0.0002

Matches : 11/82 fragment ions using 18 most intense peaks ([help](#))

| #  | b          | b <sup>++</sup> | b <sup>0</sup> | b <sup>0++</sup> | Seq. | y          | y <sup>++</sup> | y <sup>*</sup> | y <sup>*++</sup> | y <sup>0</sup> | y <sup>0++</sup> | #  |
|----|------------|-----------------|----------------|------------------|------|------------|-----------------|----------------|------------------|----------------|------------------|----|
| 1  | 100.075690 | 50.541483       |                |                  | V    |            |                 |                |                  |                |                  | 10 |
| 2  | 187.107718 | 94.057497       | 169.097153     | 85.052214        | S    | 923.494507 | 462.250892      | 906.467958     | 453.737617       | 905.483942     | 453.245609       | 9  |
| 3  | 244.129182 | 122.568229      | 226.118617     | 113.562946       | G    | 836.462479 | 418.734878      | 819.435930     | 410.221603       | 818.451914     | 409.729595       | 8  |
| 4  | 357.213246 | 179.110261      | 339.202681     | 170.104978       | L    | 779.441015 | 390.224146      | 762.414466     | 381.710871       | 761.430450     | 381.218863       | 7  |
| 5  | 428.250360 | 214.628818      | 410.239795     | 205.623535       | A    | 666.356951 | 333.682114      | 649.330402     | 325.168839       | 648.346386     | 324.676831       | 6  |
| 6  | 485.271824 | 243.139550      | 467.261259     | 234.134267       | G    | 595.319837 | 298.163557      | 578.293288     | 289.650282       | 577.309272     | 289.158274       | 5  |
| 7  | 572.303852 | 286.655564      | 554.293287     | 277.650282       | S    | 538.298373 | 269.652825      | 521.271824     | 261.139550       | 520.287808     | 260.647542       | 4  |
| 8  | 685.387916 | 343.197596      | 667.377351     | 334.192314       | I    | 451.266345 | 226.136810      | 434.239796     | 217.623536       |                |                  | 3  |
| 9  | 848.451245 | 424.729261      | 830.440680     | 415.723978       | Y    | 338.182281 | 169.594778      | 321.155732     | 161.081504       |                |                  | 2  |
| 10 |            |                 |                |                  | R    | 175.118952 | 88.063114       | 158.092403     | 79.549839        |                |                  | 1  |

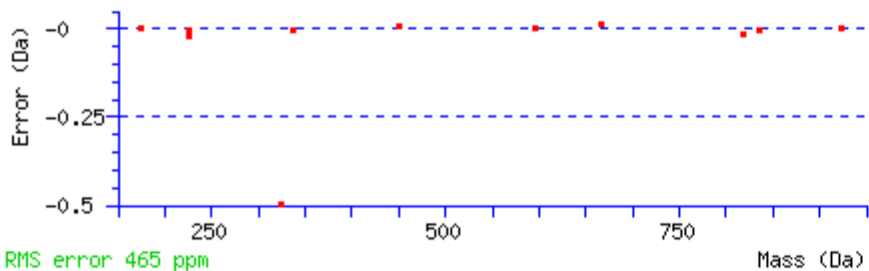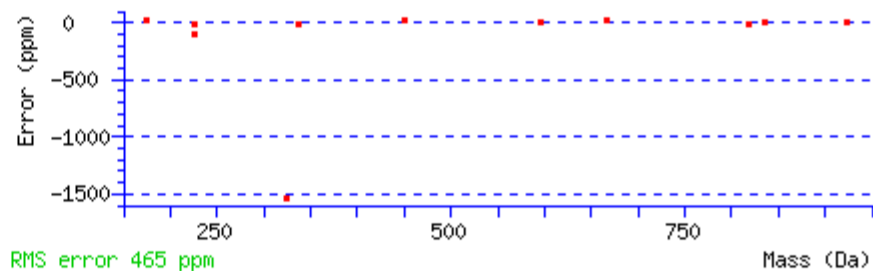

NCBI BLAST search of **VSGLAGSIYR**

(Parameters: blastp, nr protein database, expect=20000, no filter, PAM30)

Other BLAST [web gateways](#)

All matches to this query

| Score | Mr(calc):   | Delta     | Sequence                   |
|-------|-------------|-----------|----------------------------|
| 46.8  | 1021.555634 | -0.001666 | <a href="#">VSGLAGSIYR</a> |

Mascot: <http://www.matrixscience.com/>

**MATRIX SCIENCE Mascot Search Results**

**Peptide View**

MS/MS Fragmentation of **KPKPKPK**

Found in **CLD23\_HUMAN**, Claudin-23 OS=Homo sapiens GN=CLDN23 PE=1 SV=2

Match to Query 4564: 869.534968 from(435.774760,2+) rtinseconds(1662) index(4301)

Title: Locus:1.1.1.2245.6

Data file 2011-11-10 - TFD - EP 4-8.mgf

Click mouse within plot area to zoom in by factor of two about that point

Or, Plot from  to  Da

Label all possible matches  Label matches used for scoring

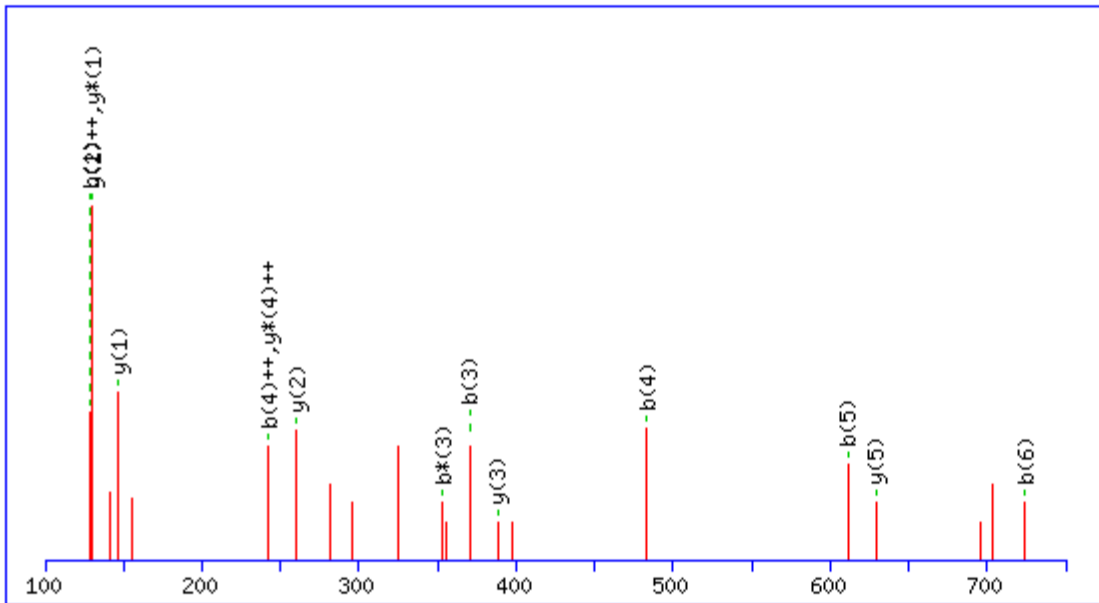

Monoisotopic mass of neutral peptide Mr(calc): 869.533432

Fixed modifications: Propionamide (C) (apply to specified residues or termini only)

Variable modifications:

P2 : Oxidation (P)

P4 : Oxidation (P)

P6 : Oxidation (P)

Ions Score: 60 Expect: 4e-006

Matches : 15/48 fragment ions using 14 most intense peaks ([help](#))

| # | b                 | b <sup>++</sup>   | b <sup>*</sup>    | b <sup>*++</sup> | Seq.     | y                 | y <sup>++</sup>   | y <sup>*</sup>    | y <sup>*++</sup>  | # |
|---|-------------------|-------------------|-------------------|------------------|----------|-------------------|-------------------|-------------------|-------------------|---|
| 1 | <b>129.102239</b> | 65.054757         | 112.075690        | 56.541483        | <b>K</b> |                   |                   |                   |                   | 7 |
| 2 | <b>242.149918</b> | 121.578597        | 225.123369        | 113.065322       | <b>P</b> | 742.445767        | 371.726522        | 725.419218        | 363.213247        | 6 |
| 3 | <b>370.244881</b> | 185.626079        | <b>353.218332</b> | 177.112804       | <b>K</b> | <b>629.398088</b> | 315.202682        | 612.371539        | 306.689408        | 5 |
| 4 | <b>483.292560</b> | <b>242.149918</b> | 466.266011        | 233.636644       | <b>P</b> | 501.303125        | 251.155201        | 484.276576        | <b>242.641926</b> | 4 |
| 5 | <b>611.387523</b> | 306.197400        | 594.360974        | 297.684125       | <b>K</b> | <b>388.255446</b> | 194.631361        | 371.228897        | 186.118087        | 3 |
| 6 | <b>724.435202</b> | 362.721239        | 707.408653        | 354.207965       | <b>P</b> | <b>260.160483</b> | <b>130.583879</b> | 243.133934        | 122.070605        | 2 |
| 7 |                   |                   |                   |                  | <b>K</b> | <b>147.112804</b> | 74.060040         | <b>130.086255</b> | 65.546765         | 1 |

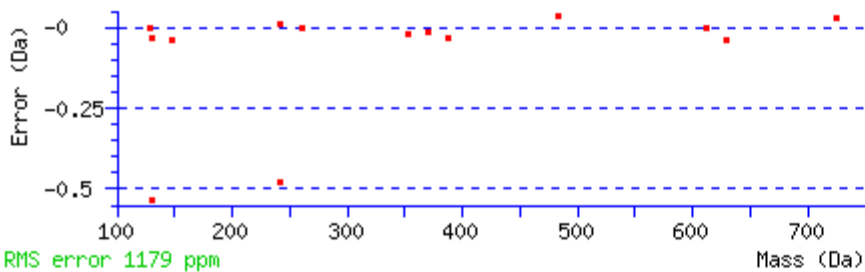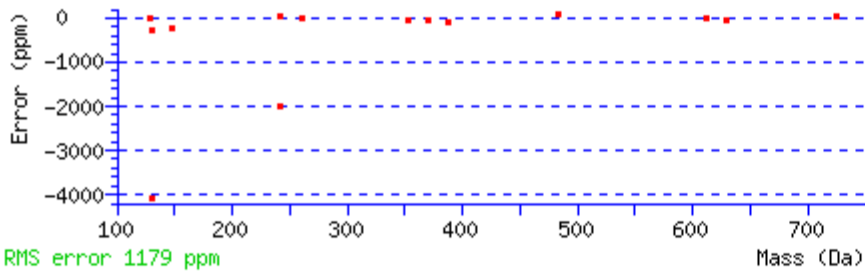

NCBI BLAST search of [KPKPKPK](#)

(Parameters: blastp, nr protein database, expect=20000, no filter, PAM30)

Other BLAST [web gateways](#)

**All matches to this query**

| Score | Mr(calc):  | Delta    | Sequence                 |
|-------|------------|----------|--------------------------|
| 60.1  | 869.533432 | 0.001536 | <a href="#">KPKPKPK</a>  |
| 60.1  | 869.533432 | 0.001536 | <a href="#">QPQLKLK</a>  |
| 43.6  | 869.533432 | 0.001536 | <a href="#">KAAVPQIK</a> |
| 43.4  | 869.533432 | 0.001536 | <a href="#">LKQIGALQ</a> |
| 42.0  | 869.533432 | 0.001536 | <a href="#">KPLKQPK</a>  |
| 40.6  | 869.533432 | 0.001536 | <a href="#">QLQQLLK</a>  |
| 40.5  | 869.533432 | 0.001536 | <a href="#">KLQPIQK</a>  |
| 27.2  | 869.533432 | 0.001536 | <a href="#">QIPQLKK</a>  |
| 27.2  | 869.533432 | 0.001536 | <a href="#">QQLQLLK</a>  |
| 27.0  | 869.533432 | 0.001536 | <a href="#">QKLLGPSK</a> |



# MATRIX SCIENCE Mascot Search Results

## Peptide View

MS/MS Fragmentation of **VYDSLALPQDLQAAR**

Found in **CLD3\_HUMAN**, Claudin-3 OS=Homo sapiens GN=CLDN3 PE=1 SV=1

Match to Query 53267: 1771.950348 from(886.982450,2+) rtinseconds(3569) index(50066)

Title: Locus:1.1.1.2509.32

Data file 2011-11-12 - TFD - EP 6-6.mgf

Click mouse within plot area to zoom in by factor of two about that point

Or, Plot from  to  Da

Label all possible matches  Label matches used for scoring

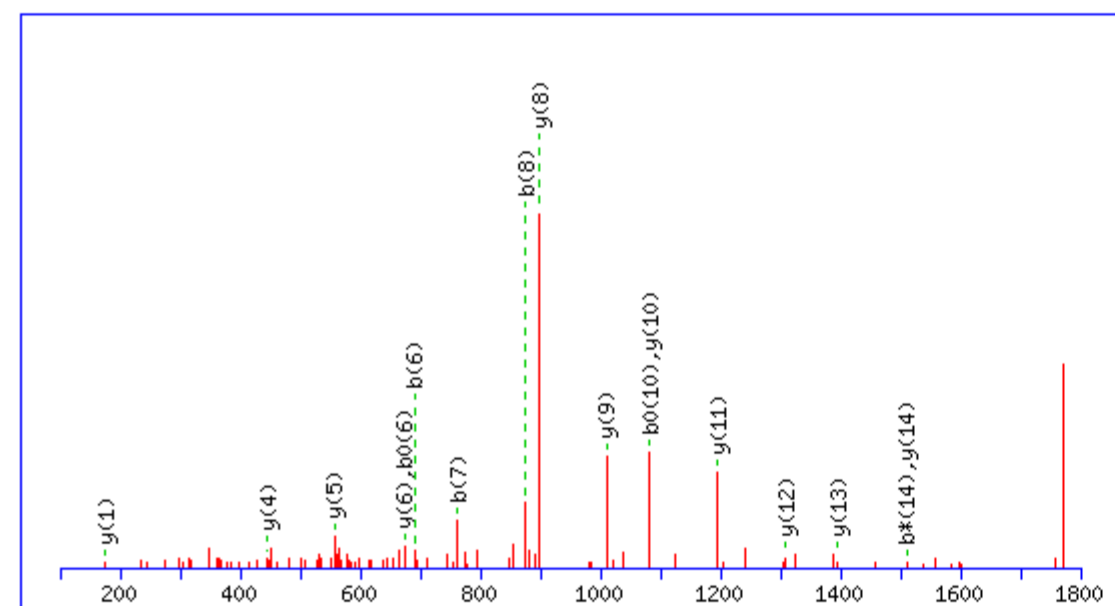

Monoisotopic mass of neutral peptide Mr(calc): 1771.946823

Fixed modifications: Propionamide (C) (apply to specified residues or termini only)

Ions Score: 69 Expect: 5.3e-007

Matches : 17/148 fragment ions using 31 most intense peaks [\(help\)](#)

| #  | b                 | b <sup>++</sup> | b <sup>*</sup>     | b <sup>*++</sup> | b <sup>0</sup>     | b <sup>0++</sup> | Seq. | y                  | y <sup>++</sup> | y <sup>*</sup> | y <sup>*++</sup> | y <sup>0</sup> | y <sup>0++</sup> | #  |
|----|-------------------|-----------------|--------------------|------------------|--------------------|------------------|------|--------------------|-----------------|----------------|------------------|----------------|------------------|----|
| 1  | 100.075690        | 50.541483       |                    |                  |                    |                  | V    |                    |                 |                |                  |                |                  | 16 |
| 2  | 263.139019        | 132.073148      |                    |                  |                    |                  | Y    | 1673.885713        | 837.446495      | 1656.859164    | 828.933220       | 1655.875148    | 828.441212       | 15 |
| 3  | 378.165962        | 189.586619      |                    |                  | 360.155397         | 180.581337       | D    | <b>1510.822384</b> | 755.914830      | 1493.795835    | 747.401556       | 1492.811819    | 746.909548       | 14 |
| 4  | 465.197990        | 233.102633      |                    |                  | 447.187425         | 224.097351       | S    | <b>1395.795441</b> | 698.401359      | 1378.768892    | 689.888084       | 1377.784876    | 689.396076       | 13 |
| 5  | 578.282054        | 289.644665      |                    |                  | 560.271489         | 280.639383       | L    | <b>1308.763413</b> | 654.885345      | 1291.736864    | 646.372070       | 1290.752848    | 645.880062       | 12 |
| 6  | <b>691.366118</b> | 346.186697      |                    |                  | <b>673.355553</b>  | 337.181415       | L    | <b>1195.679349</b> | 598.343313      | 1178.652800    | 589.830038       | 1177.668784    | 589.338030       | 11 |
| 7  | <b>762.403232</b> | 381.705254      |                    |                  | 744.392667         | 372.699972       | A    | <b>1082.595285</b> | 541.801281      | 1065.568736    | 533.288006       | 1064.584720    | 532.795998       | 10 |
| 8  | <b>875.487296</b> | 438.247286      |                    |                  | 857.476731         | 429.242004       | L    | <b>1011.558171</b> | 506.282724      | 994.531622     | 497.769449       | 993.547606     | 497.277441       | 9  |
| 9  | 972.540060        | 486.773668      |                    |                  | 954.529495         | 477.768386       | P    | <b>898.474107</b>  | 449.740692      | 881.447558     | 441.227417       | 880.463542     | 440.735409       | 8  |
| 10 | 1100.598638       | 550.802957      | 1083.572089        | 542.289683       | <b>1082.588073</b> | 541.797675       | Q    | 801.421343         | 401.214310      | 784.394794     | 392.701035       | 783.410778     | 392.209027       | 7  |
| 11 | 1215.625581       | 608.316429      | 1198.599032        | 599.803154       | 1197.615016        | 599.311146       | D    | <b>673.362765</b>  | 337.185021      | 656.336216     | 328.671746       | 655.352200     | 328.179738       | 6  |
| 12 | 1328.709645       | 664.858461      | 1311.683096        | 656.345186       | 1310.699080        | 655.853178       | L    | <b>558.335822</b>  | 279.671549      | 541.309273     | 271.158275       |                |                  | 5  |
| 13 | 1456.768223       | 728.887750      | 1439.741674        | 720.374475       | 1438.757658        | 719.882467       | Q    | <b>445.251758</b>  | 223.129517      | 428.225209     | 214.616243       |                |                  | 4  |
| 14 | 1527.805337       | 764.406307      | <b>1510.778788</b> | 755.893032       | 1509.794772        | 755.401024       | A    | 317.193180         | 159.100228      | 300.166631     | 150.586953       |                |                  | 3  |
| 15 | 1598.842451       | 799.924864      | 1581.815902        | 791.411589       | 1580.831886        | 790.919581       | A    | 246.156066         | 123.581671      | 229.129517     | 115.068396       |                |                  | 2  |
| 16 |                   |                 |                    |                  |                    |                  | R    | <b>175.118952</b>  | 88.063114       | 158.092403     | 79.549839        |                |                  | 1  |

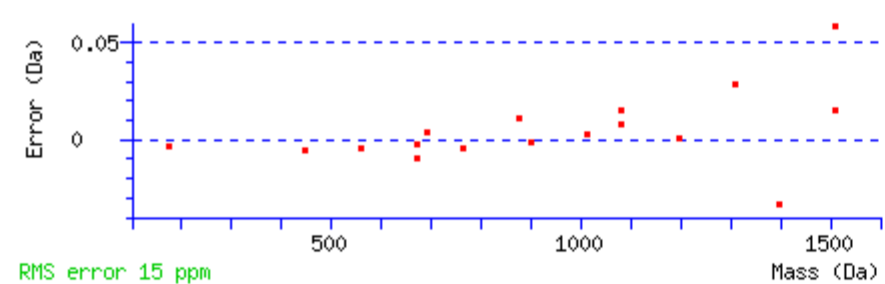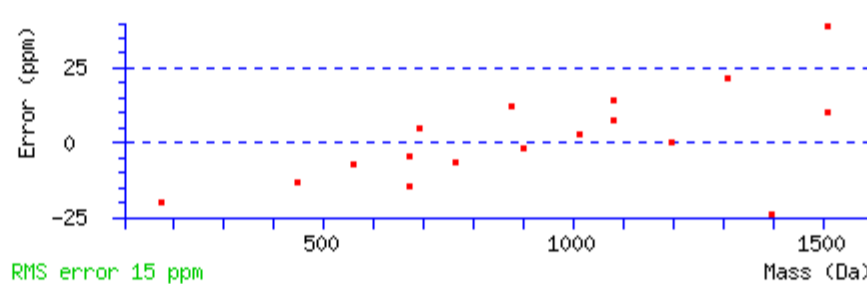

NCBI BLAST search of [VYDSLALPQDLQAAR](#)

(Parameters: blastp, nr protein database, expect=20000, no filter, PAM30)

Other BLAST [web gateways](#)

All matches to this query

| Score | Mr(calc):   | Delta    | Sequence                        |
|-------|-------------|----------|---------------------------------|
| 69.2  | 1771.946823 | 0.003525 | <a href="#">VYDSLALPQDLQAAR</a> |
| 2.2   | 1771.936935 | 0.013413 | <a href="#">GPLDLIHLWLHESAR</a> |
| 1.0   | 1771.944321 | 0.006027 | <a href="#">YPMIPPAQLFQLQAR</a> |

Mascot: <http://www.matrixscience.com/>

# **MASCOT** Mascot Search Results

## Peptide View

MS/MS Fragmentation of **CTNCLEDESAK**

Found in **CLD4\_HUMAN**, Claudin-4 OS=Homo sapiens GN=CLDN4 PE=1 SV=1

Match to Query 669135: 1325.524708 from(663.769630,2+) rtinseconds(1128) index(246155)

Title: Locus:1.1.1.871.37

Data file C:\Program Files (x86)\Matrix Science\Mascot Daemon\mgf3 TFD - Epitel - R2\mascot\_daemon\_merge.mgf

Click mouse within plot area to zoom in by factor of two about that point

Or, Plot from  to  Da

Label all possible matches  Label matches used for scoring

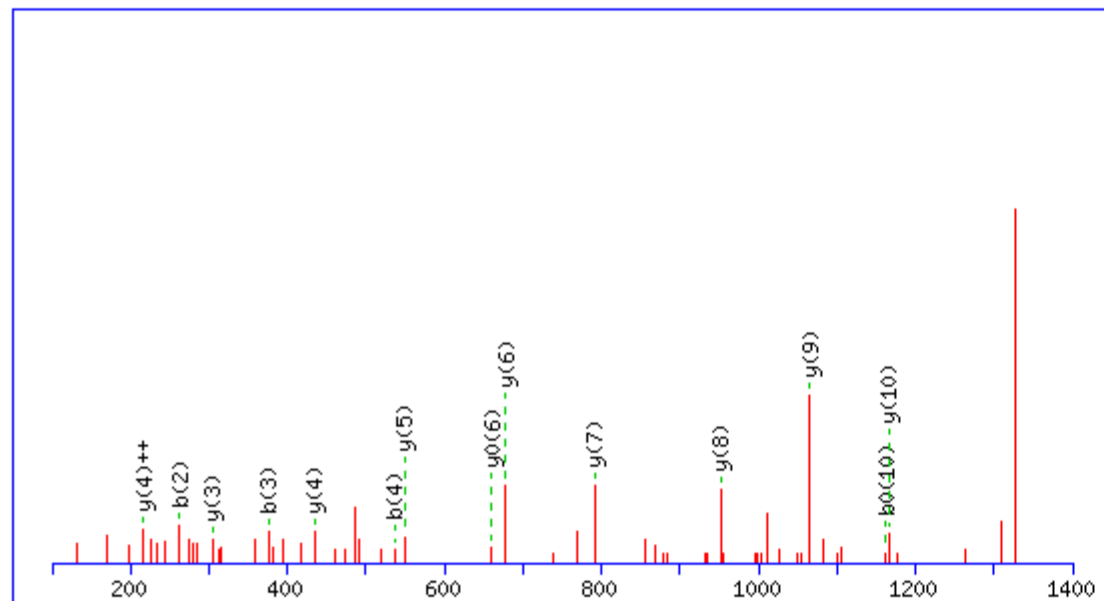

Monoisotopic mass of neutral peptide Mr(calc): 1325.522751

Fixed modifications: Carbamidomethyl (C) (apply to specified residues or termini only)

Ions Score: 56 Expect: 6.6e-006

Matches : 14/110 fragment ions using 24 most intense peaks [\(help\)](#)

| #  | b                 | b <sup>++</sup> | b <sup>*</sup> | b <sup>*++</sup> | b <sup>0</sup>     | b <sup>0++</sup> | Seq. | y                  | y <sup>++</sup>   | y <sup>*</sup> | y <sup>*++</sup> | y <sup>0</sup>    | y <sup>0++</sup> | #  |
|----|-------------------|-----------------|----------------|------------------|--------------------|------------------|------|--------------------|-------------------|----------------|------------------|-------------------|------------------|----|
| 1  | 161.037925        | 81.022600       |                |                  |                    |                  | C    |                    |                   |                |                  |                   |                  | 11 |
| 2  | <b>262.085604</b> | 131.546440      |                |                  | 244.075039         | 122.541158       | T    | <b>1166.499394</b> | 583.753335        | 1149.472845    | 575.240061       | 1148.488829       | 574.748053       | 10 |
| 3  | <b>376.128531</b> | 188.567904      | 359.101982     | 180.054629       | 358.117966         | 179.562621       | N    | <b>1065.451715</b> | 533.229496        | 1048.425166    | 524.716221       | 1047.441150       | 524.224213       | 9  |
| 4  | <b>536.159180</b> | 268.583228      | 519.132631     | 260.069954       | 518.148615         | 259.577946       | C    | <b>951.408788</b>  | 476.208032        | 934.382239     | 467.694758       | 933.398223        | 467.202750       | 8  |
| 5  | 649.243244        | 325.125260      | 632.216695     | 316.611986       | 631.232679         | 316.119978       | L    | <b>791.378139</b>  | 396.192708        | 774.351590     | 387.679433       | 773.367574        | 387.187425       | 7  |
| 6  | 778.285837        | 389.646557      | 761.259288     | 381.133282       | 760.275272         | 380.641274       | E    | <b>678.294075</b>  | 339.650676        | 661.267526     | 331.137401       | <b>660.283510</b> | 330.645393       | 6  |
| 7  | 893.312780        | 447.160028      | 876.286231     | 438.646754       | 875.302215         | 438.154746       | D    | <b>549.251482</b>  | 275.129379        | 532.224933     | 266.616105       | 531.240917        | 266.124097       | 5  |
| 8  | 1022.355373       | 511.681325      | 1005.328824    | 503.168050       | 1004.344808        | 502.676042       | E    | <b>434.224539</b>  | <b>217.615908</b> | 417.197990     | 209.102633       | 416.213974        | 208.610625       | 4  |
| 9  | 1109.387401       | 555.197339      | 1092.360852    | 546.684064       | 1091.376836        | 546.192056       | S    | <b>305.181946</b>  | 153.094611        | 288.155397     | 144.581337       | 287.171381        | 144.089329       | 3  |
| 10 | 1180.424515       | 590.715896      | 1163.397966    | 582.202621       | <b>1162.413950</b> | 581.710613       | A    | 218.149918         | 109.578597        | 201.123369     | 101.065322       |                   |                  | 2  |
| 11 |                   |                 |                |                  |                    |                  | K    | 147.112804         | 74.060040         | 130.086255     | 65.546765        |                   |                  | 1  |

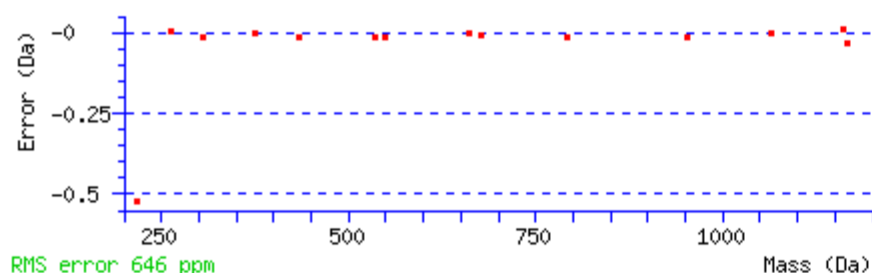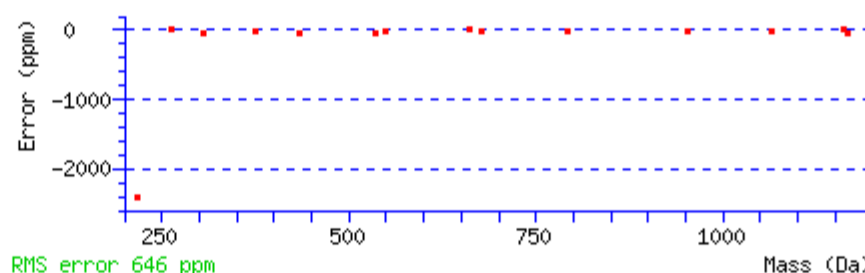

NCBI BLAST search of [CTNCLEDESAK](#)

(Parameters: blastp, nr protein database, expect=20000, no filter, PAM30)

Other BLAST [web gateways](#)

All matches to this query

| Score | Mr(calc):   | Delta    | Sequence                    |
|-------|-------------|----------|-----------------------------|
| 55.9  | 1325.522751 | 0.001957 | <a href="#">CTNCLEDESAK</a> |

Mascot: <http://www.matrixscience.com/>

**Peptide View**

MS/MS Fragmentation of **FLAFESNIGDLASILK**

Found in **CSTF3\_HUMAN**, Cleavage stimulation factor subunit 3 OS=Homo sapiens GN=CSTF3 PE=1 SV=1

Match to Query 56378: 1736.942788 from(869.478670,2+) rtinseconds(4409) index(66404)

Title: Locus:1.1.1.3052.38

Data file 2011-11-12 - TFD - EP 6-2.mgf

Click mouse within plot area to zoom in by factor of two about that point

Or, Plot from  to  Da

Label all possible matches  Label matches used for scoring

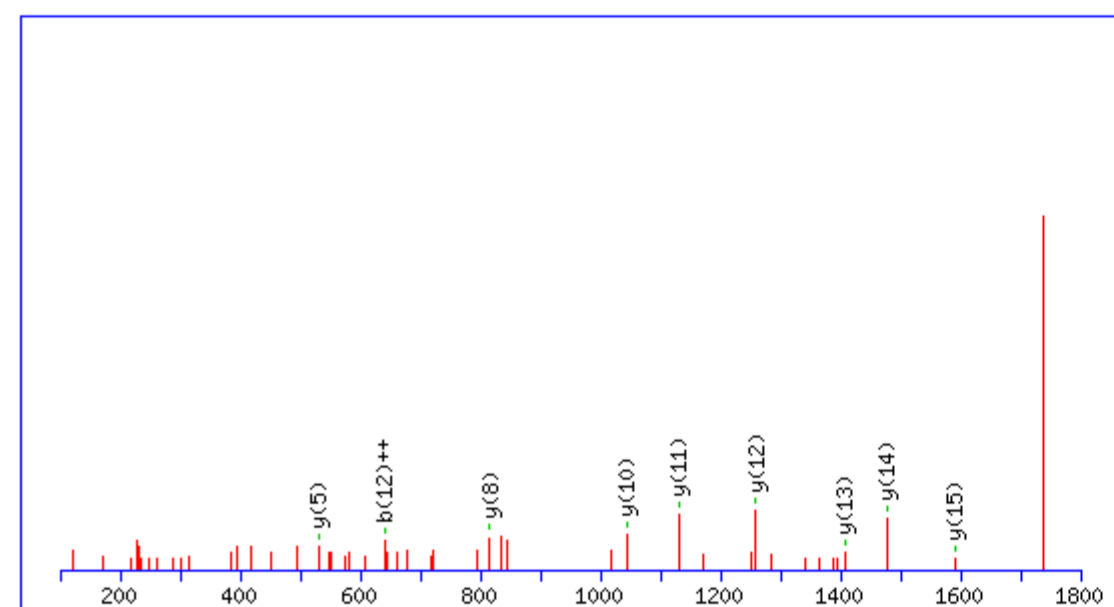

Monoisotopic mass of neutral peptide Mr(calc): 1736.934860

Fixed modifications: Propionamide (C) (apply to specified residues or termini only)

Ions Score: 50 Expect: 5.9e-005

Matches : 9/154 fragment ions using 15 most intense peaks [\(help\)](#)

| #  | b           | b <sup>++</sup> | b <sup>*</sup> | b <sup>*++</sup> | b <sup>0</sup> | b <sup>0++</sup> | Seq. | y           | y <sup>++</sup> | y <sup>*</sup> | y <sup>*++</sup> | y <sup>0</sup> | y <sup>0++</sup> | #  |
|----|-------------|-----------------|----------------|------------------|----------------|------------------|------|-------------|-----------------|----------------|------------------|----------------|------------------|----|
| 1  | 148.075690  | 74.541483       |                |                  |                |                  | F    |             |                 |                |                  |                |                  | 16 |
| 2  | 261.159754  | 131.083515      |                |                  |                |                  | L    | 1590.873749 | 795.940512      | 1573.847200    | 787.427238       | 1572.863184    | 786.935230       | 15 |
| 3  | 332.196868  | 166.602072      |                |                  |                |                  | A    | 1477.789685 | 739.398480      | 1460.763136    | 730.885206       | 1459.779120    | 730.393198       | 14 |
| 4  | 479.265282  | 240.136279      |                |                  |                |                  | F    | 1406.752571 | 703.879923      | 1389.726022    | 695.366649       | 1388.742006    | 694.874641       | 13 |
| 5  | 608.307875  | 304.657576      |                |                  | 590.297310     | 295.652293       | E    | 1259.684157 | 630.345716      | 1242.657608    | 621.832442       | 1241.673592    | 621.340434       | 12 |
| 6  | 695.339903  | 348.173589      |                |                  | 677.329338     | 339.168307       | S    | 1130.641564 | 565.824420      | 1113.615015    | 557.311145       | 1112.630999    | 556.819137       | 11 |
| 7  | 809.382830  | 405.195053      | 792.356281     | 396.681778       | 791.372265     | 396.189770       | N    | 1043.609536 | 522.308406      | 1026.582987    | 513.795131       | 1025.598971    | 513.303123       | 10 |
| 8  | 922.466894  | 461.737085      | 905.440345     | 453.223810       | 904.456329     | 452.731802       | I    | 929.566609  | 465.286942      | 912.540060     | 456.773668       | 911.556044     | 456.281660       | 9  |
| 9  | 979.488358  | 490.247817      | 962.461809     | 481.734542       | 961.477793     | 481.242534       | G    | 816.482545  | 408.744910      | 799.455996     | 400.231636       | 798.471980     | 399.739628       | 8  |
| 10 | 1094.515301 | 547.761288      | 1077.488752    | 539.248014       | 1076.504736    | 538.756006       | D    | 759.461081  | 380.234178      | 742.434532     | 371.720904       | 741.450516     | 371.228896       | 7  |
| 11 | 1207.599365 | 604.303320      | 1190.572816    | 595.790046       | 1189.588800    | 595.298038       | L    | 644.434138  | 322.720707      | 627.407589     | 314.207432       | 626.423573     | 313.715424       | 6  |
| 12 | 1278.636479 | 639.821877      | 1261.609930    | 631.308603       | 1260.625914    | 630.816595       | A    | 531.350074  | 266.178675      | 514.323525     | 257.665400       | 513.339509     | 257.173392       | 5  |
| 13 | 1365.668507 | 683.337891      | 1348.641958    | 674.824617       | 1347.657942    | 674.332609       | S    | 460.312960  | 230.660118      | 443.286411     | 222.146843       | 442.302395     | 221.654835       | 4  |
| 14 | 1478.752571 | 739.879923      | 1461.726022    | 731.366649       | 1460.742006    | 730.874641       | I    | 373.280932  | 187.144104      | 356.254383     | 178.630829       |                |                  | 3  |
| 15 | 1591.836635 | 796.421955      | 1574.810086    | 787.908681       | 1573.826070    | 787.416673       | L    | 260.196868  | 130.602072      | 243.170319     | 122.088797       |                |                  | 2  |
| 16 |             |                 |                |                  |                |                  | K    | 147.112804  | 74.060040       | 130.086255     | 65.546765        |                |                  | 1  |

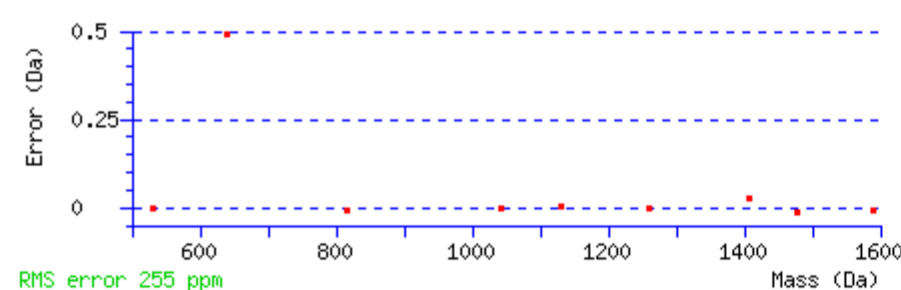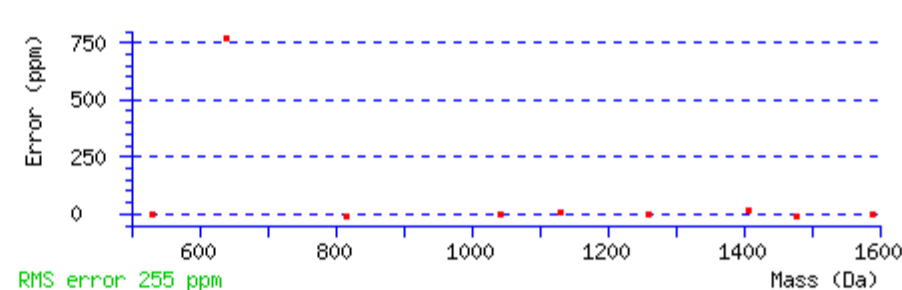

NCBI BLAST search of [FLAFESNIGDLASILK](#)

(Parameters: blastp, nr protein database, expect=20000, no filter, PAM30)

Other BLAST [web gateways](#)

All matches to this query

| Score | Mr(calc):   | Delta    | Sequence                         |
|-------|-------------|----------|----------------------------------|
| 50.4  | 1736.934860 | 0.007928 | <a href="#">FLAFESNIGDLASILK</a> |

**Peptide View**

MS/MS Fragmentation of **QNKPSSVIQPK**

Found in **CDRT4\_HUMAN**, CMT1A duplicated region transcript 4 protein OS=Homo sapiens GN=CDRT4 PE=2 SV=2

Match to Query 34581: 1240.676488 from(621.345520,2+) rtinseconds(2659) index(35759)

Title: Locus:1.1.1.1402.22

Data file 2012-01-27 - TFD - Epitel - IEC - 10ul - 1.mgf

Click mouse within plot area to zoom in by factor of two about that point

Or, Plot from  to  Da

Label all possible matches  Label matches used for scoring

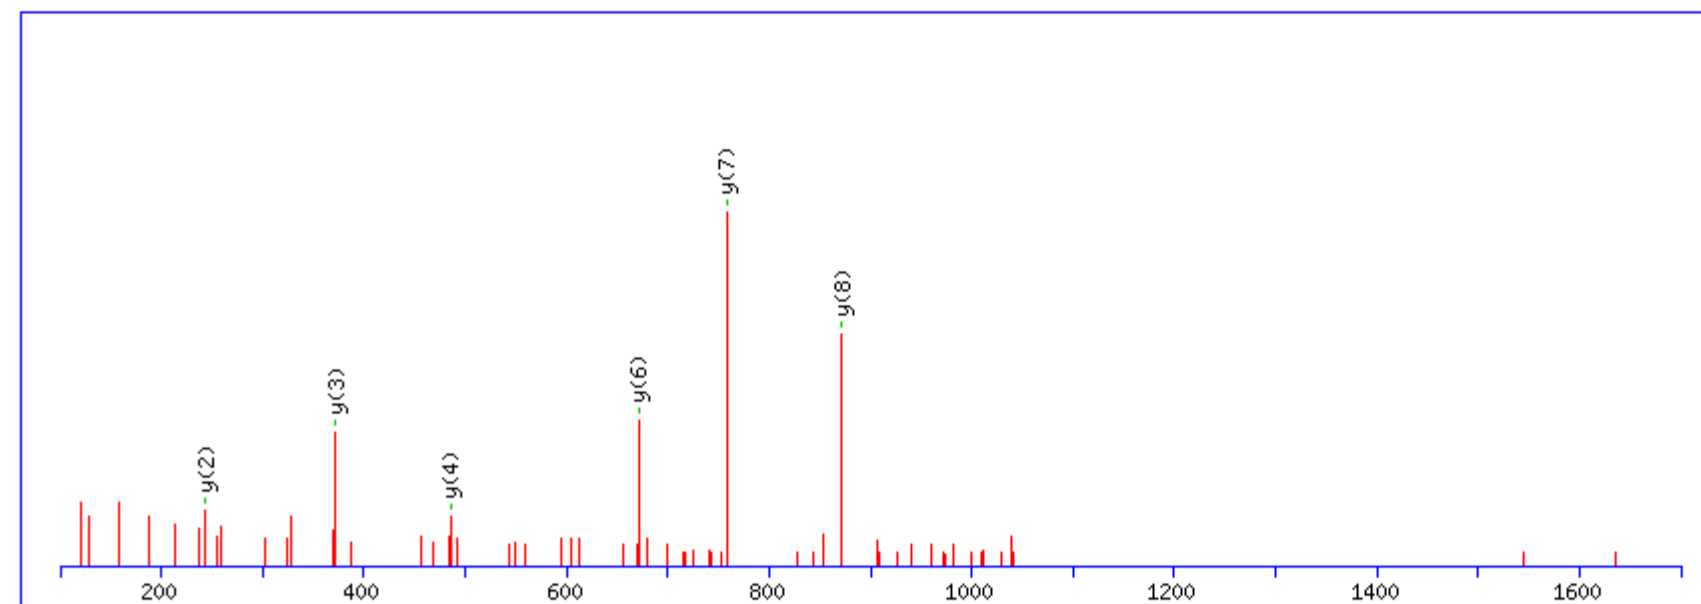

Monoisotopic mass of neutral peptide Mr(calc): 1240.677536

Fixed modifications: Carbamidomethyl (C) (apply to specified residues or termini only)

Variable modifications:

P4 : Oxidation (P)

Ions Score: 42 Expect: 0.00074

Matches : 6/102 fragment ions using 10 most intense peaks [\(help\)](#)

| #  | b           | b <sup>++</sup> | b <sup>+</sup> | b <sup>+++</sup> | b <sup>0</sup> | b <sup>0++</sup> | Seq. | y                 | y <sup>++</sup> | y <sup>+</sup> | y <sup>+++</sup> | y <sup>0</sup> | y <sup>0++</sup> | #  |
|----|-------------|-----------------|----------------|------------------|----------------|------------------|------|-------------------|-----------------|----------------|------------------|----------------|------------------|----|
| 1  | 129.065854  | 65.036565       | 112.039305     | 56.523291        |                |                  | Q    |                   |                 |                |                  |                |                  | 11 |
| 2  | 243.108781  | 122.058029      | 226.082232     | 113.544754       |                |                  | N    | 1113.626249       | 557.316763      | 1096.599700    | 548.803488       | 1095.615684    | 548.311480       | 10 |
| 3  | 371.203744  | 186.105510      | 354.177195     | 177.592236       |                |                  | K    | 999.583322        | 500.295299      | 982.556773     | 491.782024       | 981.572757     | 491.290016       | 9  |
| 4  | 484.251423  | 242.629349      | 467.224874     | 234.116075       |                |                  | P    | <b>871.488359</b> | 436.247818      | 854.461810     | 427.734543       | 853.477794     | 427.242535       | 8  |
| 5  | 571.283451  | 286.145364      | 554.256902     | 277.632089       | 553.272886     | 277.140081       | S    | <b>758.440680</b> | 379.723978      | 741.414131     | 371.210704       | 740.430115     | 370.718696       | 7  |
| 6  | 658.315479  | 329.661378      | 641.288930     | 321.148103       | 640.304914     | 320.656095       | S    | <b>671.408652</b> | 336.207964      | 654.382103     | 327.694690       | 653.398087     | 327.202682       | 6  |
| 7  | 757.383893  | 379.195585      | 740.357344     | 370.682310       | 739.373328     | 370.190302       | V    | 584.376624        | 292.691950      | 567.350075     | 284.178676       |                |                  | 5  |
| 8  | 870.467957  | 435.737617      | 853.441408     | 427.224342       | 852.457392     | 426.732334       | I    | <b>485.308210</b> | 243.157743      | 468.281661     | 234.644469       |                |                  | 4  |
| 9  | 998.526535  | 499.766906      | 981.499986     | 491.253631       | 980.515970     | 490.761623       | Q    | <b>372.224146</b> | 186.615711      | 355.197597     | 178.102437       |                |                  | 3  |
| 10 | 1095.579299 | 548.293288      | 1078.552750    | 539.780013       | 1077.568734    | 539.288005       | P    | <b>244.165568</b> | 122.586422      | 227.139019     | 114.073148       |                |                  | 2  |
| 11 |             |                 |                |                  |                |                  | K    | 147.112804        | 74.060040       | 130.086255     | 65.546765        |                |                  | 1  |

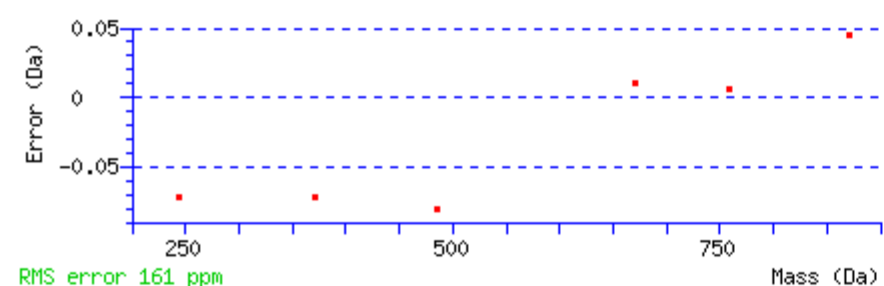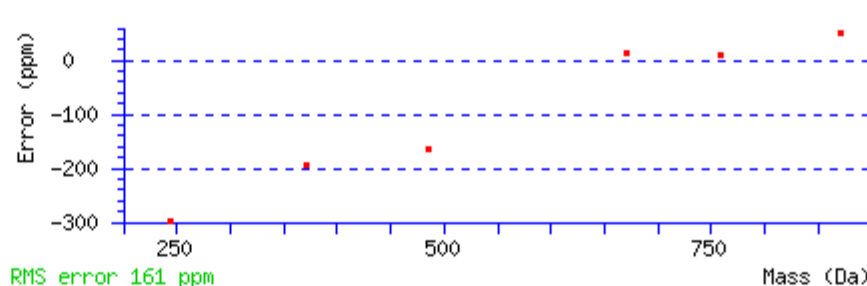

NCBI BLAST search of [QNKPSSVIQPK](#)

(Parameters: blastp, nr protein database, expect=20000, no filter, PAM30)

Other BLAST [web gateways](#)

**All matches to this query**

| Score | Mr(calc):   | Delta     | Sequence                      |
|-------|-------------|-----------|-------------------------------|
| 42.3  | 1240.677536 | -0.001048 | <a href="#">QNKPSSVIQPK</a>   |
| 16.4  | 1240.677521 | -0.001033 | <a href="#">QEILEQVLNR</a>    |
| 11.1  | 1240.666275 | 0.010213  | <a href="#">KEEKPEPQIK</a>    |
| 8.3   | 1240.684921 | -0.008433 | <a href="#">KPEPCKPILK</a>    |
| 7.3   | 1240.677521 | -0.001033 | <a href="#">EQIIVEKNPR</a>    |
| 4.6   | 1240.688736 | -0.012248 | <a href="#">EQLANLAARQK</a>   |
| 4.5   | 1240.666275 | 0.010213  | <a href="#">KEEKPEPQIK</a>    |
| 1.1   | 1240.677521 | -0.001033 | <a href="#">AAEVLINQLDR</a>   |
| 0.4   | 1240.688766 | -0.012278 | <a href="#">NQQLGATIKR</a>    |
| 0.3   | 1240.666321 | 0.010167  | <a href="#">ASVPPVLPSSSGK</a> |

# MASCOT SCIENCE Mascot Search Results

## Peptide View

MS/MS Fragmentation of **EALILEPSLYTVK**

Found in **COPZI\_HUMAN**, Coatomer subunit zeta-1 OS=Homo sapiens GN=COPZ1 PE=1 SV=1

Match to Query 43861: 1474.815388 from(738.414970,2+) rtinseconds(3156) index(44355)

Title: Locus:1.1.1.1642.35

Data file 2012-01-27 - TFD - Epitel - IEC - 10ul - 3.mgf

Click mouse within plot area to zoom in by factor of two about that point

Or, Plot from  to  Da

Label all possible matches  Label matches used for scoring

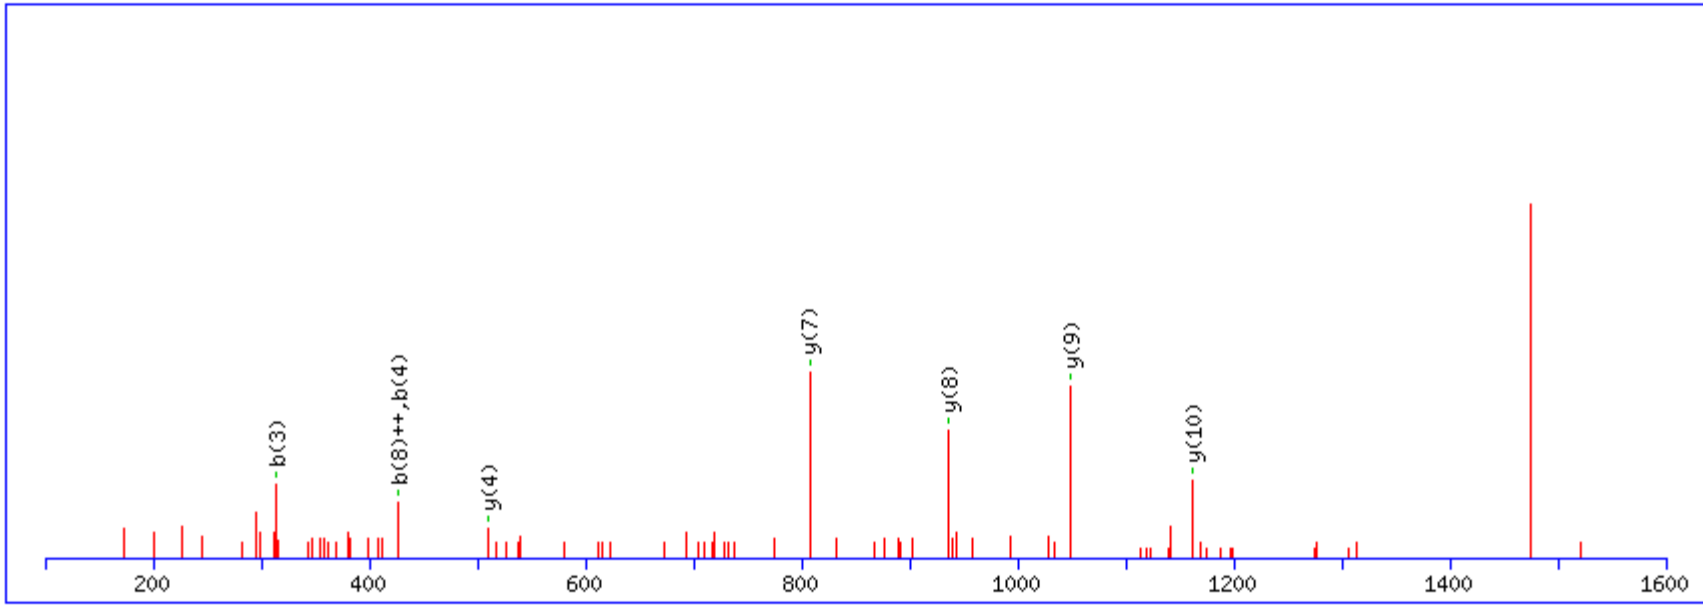

Monoisotopic mass of neutral peptide Mr(calc): 1474.828262

Fixed modifications: Carbamidomethyl (C) (apply to specified residues or termini only)

Ions Score: 31 Expect: 0.0061

Matches : 8/116 fragment ions using 12 most intense peaks [\(help\)](#)

| #  | b                 | b <sup>++</sup>   | b <sup>0</sup> | b <sup>0++</sup> | Seq. | y                  | y <sup>++</sup> | y <sup>*</sup> | y <sup>*++</sup> | y <sup>0</sup> | y <sup>0++</sup> | #  |
|----|-------------------|-------------------|----------------|------------------|------|--------------------|-----------------|----------------|------------------|----------------|------------------|----|
| 1  | 130.049869        | 65.528572         | 112.039304     | 56.523290        | E    |                    |                 |                |                  |                |                  | 13 |
| 2  | 201.086983        | 101.047130        | 183.076418     | 92.041847        | A    | 1346.792981        | 673.900129      | 1329.766432    | 665.386854       | 1328.782416    | 664.894846       | 12 |
| 3  | <b>314.171047</b> | 157.589161        | 296.160482     | 148.583879       | L    | 1275.755867        | 638.381572      | 1258.729318    | 629.868297       | 1257.745302    | 629.376289       | 11 |
| 4  | <b>427.255111</b> | 214.131193        | 409.244546     | 205.125911       | I    | <b>1162.671803</b> | 581.839540      | 1145.645254    | 573.326265       | 1144.661238    | 572.834257       | 10 |
| 5  | 540.339175        | 270.673226        | 522.328610     | 261.667943       | L    | <b>1049.587739</b> | 525.297508      | 1032.561190    | 516.784233       | 1031.577174    | 516.292225       | 9  |
| 6  | 669.381768        | 335.194522        | 651.371203     | 326.189240       | E    | <b>936.503675</b>  | 468.755476      | 919.477126     | 460.242201       | 918.493110     | 459.750193       | 8  |
| 7  | 766.434532        | 383.720904        | 748.423967     | 374.715622       | P    | <b>807.461082</b>  | 404.234179      | 790.434533     | 395.720905       | 789.450517     | 395.228897       | 7  |
| 8  | 853.466560        | <b>427.236918</b> | 835.455995     | 418.231636       | S    | 710.408318         | 355.707797      | 693.381769     | 347.194523       | 692.397753     | 346.702515       | 6  |
| 9  | 966.550624        | 483.778950        | 948.540059     | 474.773668       | L    | 623.376290         | 312.191783      | 606.349741     | 303.678509       | 605.365725     | 303.186501       | 5  |
| 10 | 1129.613953       | 565.310615        | 1111.603388    | 556.305332       | Y    | <b>510.292226</b>  | 255.649751      | 493.265677     | 247.136477       | 492.281661     | 246.644469       | 4  |
| 11 | 1230.661632       | 615.834454        | 1212.651067    | 606.829172       | T    | 347.228897         | 174.118087      | 330.202348     | 165.604812       | 329.218332     | 165.112804       | 3  |
| 12 | 1329.730046       | 665.368661        | 1311.719481    | 656.363379       | V    | 246.181218         | 123.594247      | 229.154669     | 115.080973       |                |                  | 2  |
| 13 |                   |                   |                |                  | K    | 147.112804         | 74.060040       | 130.086255     | 65.546765        |                |                  | 1  |

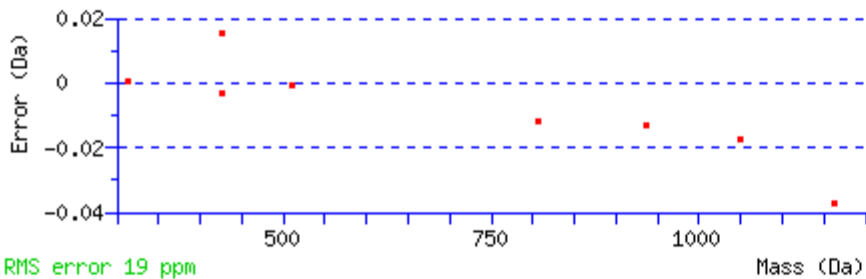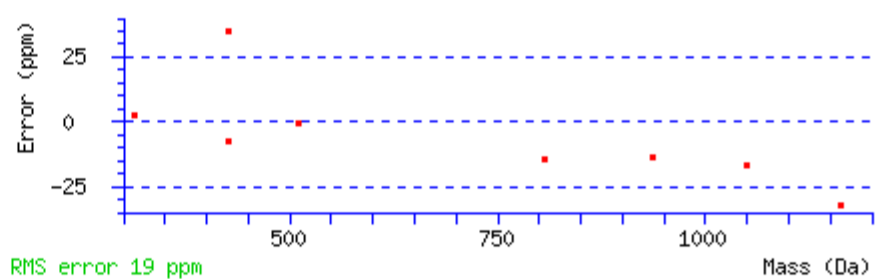

NCBI BLAST search of **EALILEPSLYTVK**

(Parameters: blastp, nr protein database, expect=20000, no filter, PAM30)

Other BLAST [web gateways](#)

All matches to this query

| Score | Mr(calc):   | Delta     | Sequence                      |
|-------|-------------|-----------|-------------------------------|
| 31.3  | 1474.828262 | -0.012874 | <a href="#">EALILEPSLYTVK</a> |
| 8.8   | 1474.828278 | -0.012890 | <a href="#">IISLDLPVAEVYK</a> |
| 2.5   | 1474.814377 | 0.001011  | <a href="#">VLVEVLADPLDHR</a> |

Mascot: <http://www.matrixscience.com/>

# Mascot Search Results

## Peptide View

### MS/MS Fragmentation of **LSDYLFTLAR**

Found in **MMAB\_HUMAN**, Cob(D)yrinic acid a,c-diamide adenosyltransferase, mitochondrial OS=Homo sapiens GN=MMAB PE=1 SV=1

Match to Query 30107: 1197.635028 from(599.824790,2+) rtinseconds(3365) index(46479)

Title: Locus:1.1.1.2595.19

Data file 2011-11-10 - TFD - EP 4-5.mgf

Click mouse within plot area to zoom in by factor of two about that point

Or, Plot from  to  Da

Label all possible matches  Label matches used for scoring

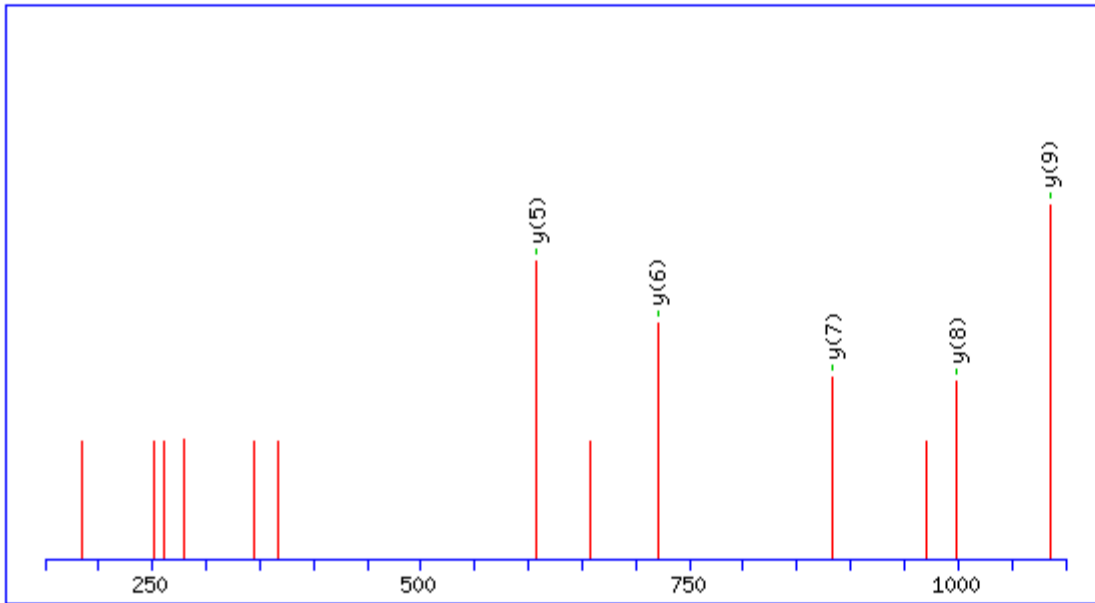

Monoisotopic mass of neutral peptide Mr(calc): 1197.639359

Fixed modifications: Propionamide (C) (apply to specified residues or termini only)

Ions Score: 36 Expect: 0.0027

Matches : 5/82 fragment ions using 8 most intense peaks ([help](#))

| #  | b           | b <sup>++</sup> | b <sup>0</sup> | b <sup>0++</sup> | Seq. | y           | y <sup>++</sup> | y <sup>*</sup> | y <sup>*++</sup> | y <sup>0</sup> | y <sup>0++</sup> | #  |
|----|-------------|-----------------|----------------|------------------|------|-------------|-----------------|----------------|------------------|----------------|------------------|----|
| 1  | 114.091340  | 57.549308       |                |                  | L    |             |                 |                |                  |                |                  | 10 |
| 2  | 201.123368  | 101.065322      | 183.112803     | 92.060039        | S    | 1085.562587 | 543.284932      | 1068.536038    | 534.771657       | 1067.552022    | 534.279649       | 9  |
| 3  | 316.150311  | 158.578793      | 298.139746     | 149.573511       | D    | 998.530559  | 499.768918      | 981.504010     | 491.255643       | 980.519994     | 490.763635       | 8  |
| 4  | 479.213640  | 240.110458      | 461.203075     | 231.105176       | Y    | 883.503616  | 442.255446      | 866.477067     | 433.742171       | 865.493051     | 433.250163       | 7  |
| 5  | 592.297704  | 296.652490      | 574.287139     | 287.647208       | L    | 720.440287  | 360.723782      | 703.413738     | 352.210507       | 702.429722     | 351.718499       | 6  |
| 6  | 739.366118  | 370.186697      | 721.355553     | 361.181415       | F    | 607.356223  | 304.181750      | 590.329674     | 295.668475       | 589.345658     | 295.176467       | 5  |
| 7  | 840.413797  | 420.710537      | 822.403232     | 411.705254       | T    | 460.287809  | 230.647542      | 443.261260     | 222.134268       | 442.277244     | 221.642260       | 4  |
| 8  | 953.497861  | 477.252569      | 935.487296     | 468.247286       | L    | 359.240130  | 180.123703      | 342.213581     | 171.610428       |                |                  | 3  |
| 9  | 1024.534975 | 512.771125      | 1006.524410    | 503.765843       | A    | 246.156066  | 123.581671      | 229.129517     | 115.068396       |                |                  | 2  |
| 10 |             |                 |                |                  | R    | 175.118952  | 88.063114       | 158.092403     | 79.549839        |                |                  | 1  |

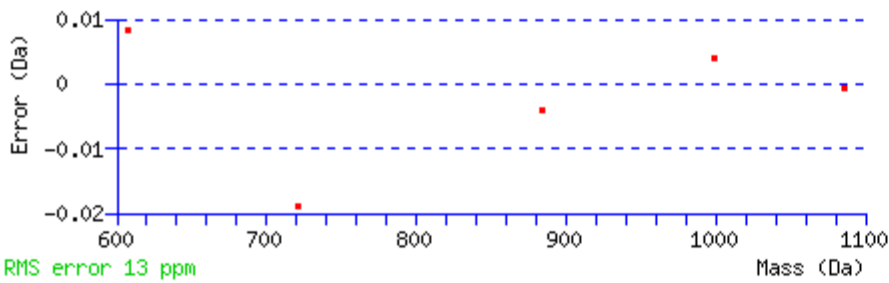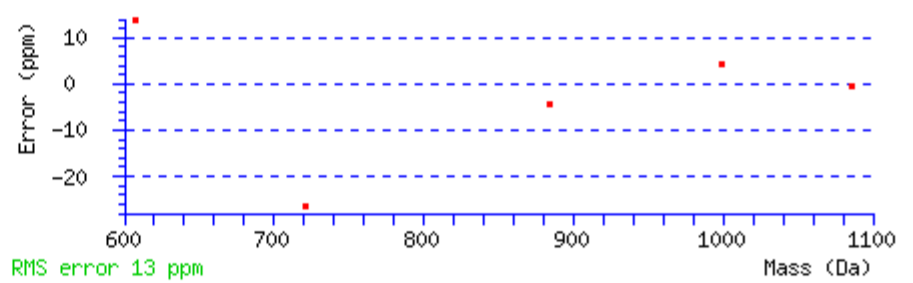

### NCBI BLAST search of **LSDYLFTLAR**

(Parameters: blastp, nr protein database, expect=20000, no filter, PAM30)

Other BLAST [web gateways](#)

### All matches to this query

| Score | Mr(calc):   | Delta     | Sequence                   |
|-------|-------------|-----------|----------------------------|
| 36.4  | 1197.639359 | -0.004331 | <a href="#">LSDYLFTLAR</a> |
| 11.4  | 1197.635330 | -0.000302 | <a href="#">LSDLQPQIER</a> |
| 0.7   | 1197.635330 | -0.000302 | <a href="#">INPETDLPRK</a> |
| 0.4   | 1197.639359 | -0.004331 | <a href="#">EVHLPEIFAK</a> |

Mascot: <http://www.matrixscience.com/>

# **MASCOT** Mascot Search Results

## Peptide View

MS/MS Fragmentation of **LEDMRILR**

Found in **CC147\_HUMAN**, Coiled-coil domain-containing protein 147 OS=Homo sapiens GN=CCDC147 PE=2 SV=1

Match to Query 20132: 1044.578968 from(523.296760,2+) rtinseconds(2371) index(29387)

Title: Locus:1.1.1.2343.20

Data file 2011-11-10 - TFD - EP 3-2.mgf

Click mouse within plot area to zoom in by factor of two about that point

Or, Plot from  to  Da

Label all possible matches  Label matches used for scoring

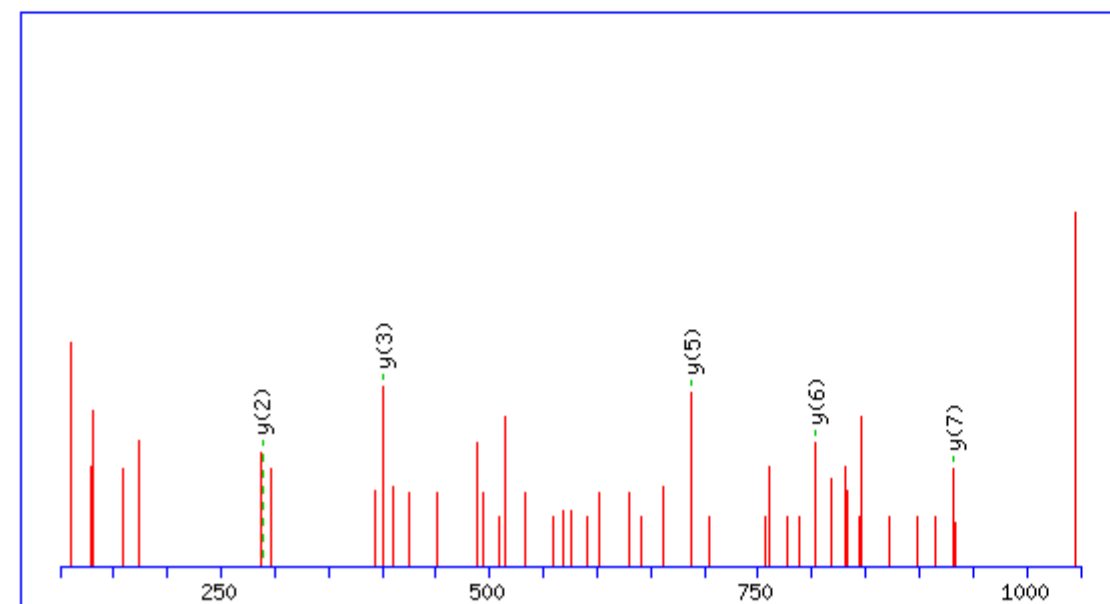

Monoisotopic mass of neutral peptide Mr(calc): 1044.574966

Fixed modifications: Propionamide (C) (apply to specified residues or termini only)

Ions Score: 34 Expect: 0.0041

Matches : 5/64 fragment ions using 9 most intense peaks ([help](#))

| # | b          | b <sup>++</sup> | b <sup>*</sup> | b <sup>***</sup> | b <sup>0</sup> | b <sup>0++</sup> | Seq. | y                 | y <sup>++</sup> | y <sup>*</sup> | y <sup>***</sup> | y <sup>0</sup> | y <sup>0++</sup> | # |
|---|------------|-----------------|----------------|------------------|----------------|------------------|------|-------------------|-----------------|----------------|------------------|----------------|------------------|---|
| 1 | 114.091340 | 57.549308       |                |                  |                |                  | L    |                   |                 |                |                  |                |                  | 8 |
| 2 | 243.133933 | 122.070605      |                |                  | 225.123368     | 113.065322       | E    | <b>932.498212</b> | 466.752744      | 915.471663     | 458.239470       | 914.487647     | 457.747462       | 7 |
| 3 | 358.160876 | 179.584076      |                |                  | 340.150311     | 170.578794       | D    | <b>803.455619</b> | 402.231448      | 786.429070     | 393.718173       | 785.445054     | 393.226165       | 6 |
| 4 | 489.201361 | 245.104319      |                |                  | 471.190796     | 236.099036       | M    | <b>688.428676</b> | 344.717976      | 671.402127     | 336.204702       |                |                  | 5 |
| 5 | 645.302472 | 323.154874      | 628.275923     | 314.641600       | 627.291907     | 314.149592       | R    | 557.388191        | 279.197734      | 540.361642     | 270.684459       |                |                  | 4 |
| 6 | 758.386536 | 379.696906      | 741.359987     | 371.183632       | 740.375971     | 370.691624       | I    | <b>401.287080</b> | 201.147178      | 384.260531     | 192.633903       |                |                  | 3 |
| 7 | 871.470600 | 436.238938      | 854.444051     | 427.725664       | 853.460035     | 427.233656       | L    | <b>288.203016</b> | 144.605146      | 271.176467     | 136.091871       |                |                  | 2 |
| 8 |            |                 |                |                  |                |                  | R    | 175.118952        | 88.063114       | 158.092403     | 79.549839        |                |                  | 1 |

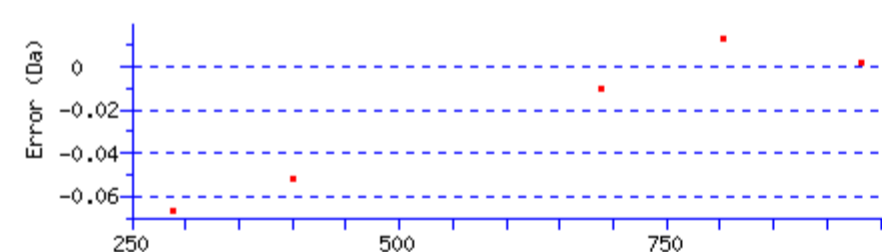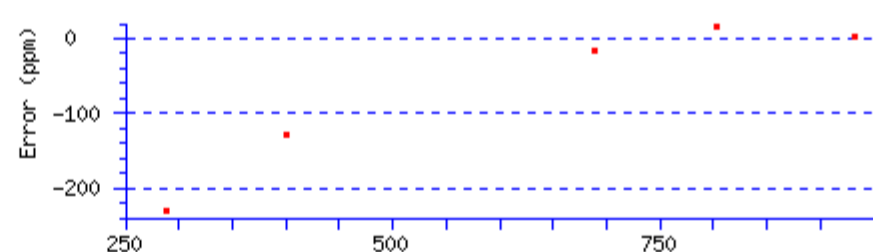

NCBI BLAST search of [LEDMRILR](#)

(Parameters: blastp, nr protein database, expect=20000, no filter, PAM30)

Other BLAST [web gateways](#)

## All matches to this query

| Score | Mr(calc):   | Delta     | Sequence                  |
|-------|-------------|-----------|---------------------------|
| 34.0  | 1044.574966 | 0.004002  | <a href="#">LEDMRILR</a>  |
| 23.0  | 1044.581512 | -0.002544 | <a href="#">LDTDISLIR</a> |
| 16.6  | 1044.574966 | 0.004002  | <a href="#">QSAALCLR</a>  |
| 8.4   | 1044.570282 | 0.008686  | <a href="#">ELDTVEVLK</a> |
| 8.2   | 1044.574966 | 0.004002  | <a href="#">IKAAMNIPR</a> |
| 8.1   | 1044.570267 | 0.008701  | <a href="#">LSEDIDLLK</a> |
| 8.0   | 1044.571609 | 0.007359  | <a href="#">LSSAHVYLR</a> |
| 8.0   | 1044.581512 | -0.002544 | <a href="#">LSVEIDTLR</a> |
| 7.5   | 1044.570267 | 0.008701  | <a href="#">EEVSIEVLK</a> |
| 5.4   | 1044.571625 | 0.007343  | <a href="#">FPDRILPR</a>  |

**Peptide View**

MS/MS Fragmentation of **FPDLAAEK**

Found in **CCD25\_HUMAN**, Coiled-coil domain-containing protein 25 OS=Homo sapiens GN=CCDC25 PE=1 SV=2

Match to Query 7473: 889.453188 from(445.733870,2+) rtinseconds(2076) index(22450)

Title: Locus:1.1.1.2106.6

Data file 2011-11-10 - TFD - EP 4-5.mgf

Click mouse within plot area to zoom in by factor of two about that point

Or, Plot from  to  Da

Label all possible matches  Label matches used for scoring

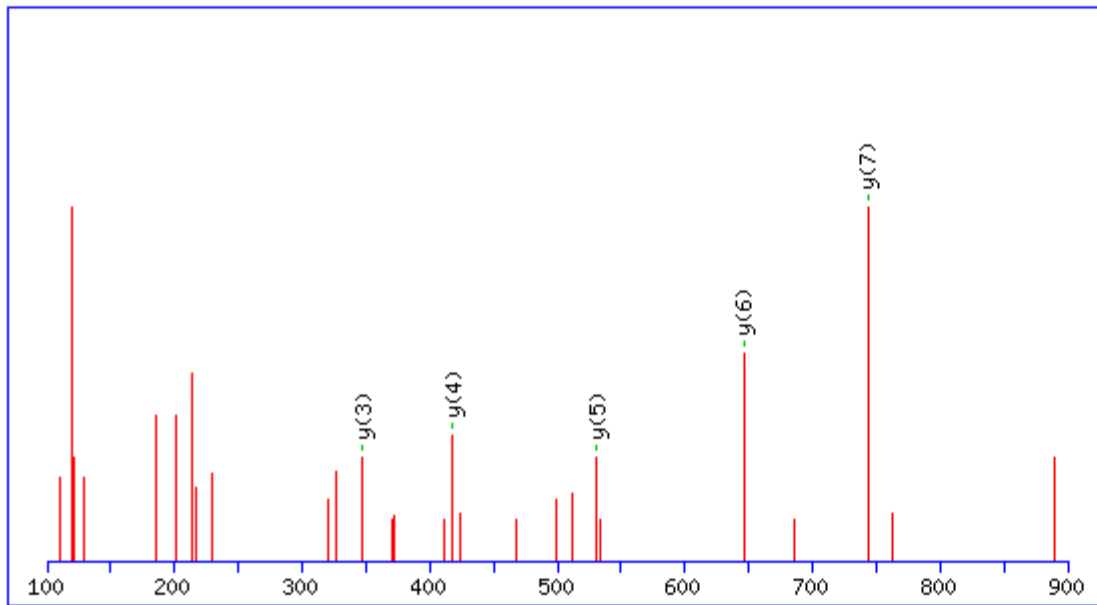

Monoisotopic mass of neutral peptide Mr(calc): 889.454514

Fixed modifications: Propionamide (C) (apply to specified residues or termini only)

Ions Score: 40 Expect: 0.0016

Matches : 5/64 fragment ions using 7 most intense peaks [\(help\)](#)

| # | b          | b <sup>++</sup> | b <sup>0</sup> | b <sup>0++</sup> | Seq.     | y                 | y <sup>++</sup> | y <sup>*</sup> | y <sup>*++</sup> | y <sup>0</sup> | y <sup>0++</sup> | #        |
|---|------------|-----------------|----------------|------------------|----------|-------------------|-----------------|----------------|------------------|----------------|------------------|----------|
| 1 | 148.075690 | 74.541483       |                |                  | <b>F</b> |                   |                 |                |                  |                |                  | <b>8</b> |
| 2 | 245.128454 | 123.067865      |                |                  | <b>P</b> | <b>743.393396</b> | 372.200336      | 726.366847     | 363.687062       | 725.382831     | 363.195054       | <b>7</b> |
| 3 | 360.155397 | 180.581336      | 342.144832     | 171.576054       | <b>D</b> | <b>646.340632</b> | 323.673954      | 629.314083     | 315.160680       | 628.330067     | 314.668672       | <b>6</b> |
| 4 | 473.239461 | 237.123369      | 455.228896     | 228.118086       | <b>L</b> | <b>531.313689</b> | 266.160483      | 514.287140     | 257.647208       | 513.303124     | 257.155200       | <b>5</b> |
| 5 | 544.276575 | 272.641926      | 526.266010     | 263.636643       | <b>A</b> | <b>418.229625</b> | 209.618450      | 401.203076     | 201.105176       | 400.219060     | 200.613168       | <b>4</b> |
| 6 | 615.313689 | 308.160483      | 597.303124     | 299.155200       | <b>A</b> | <b>347.192511</b> | 174.099893      | 330.165962     | 165.586619       | 329.181946     | 165.094611       | <b>3</b> |
| 7 | 744.356282 | 372.681779      | 726.345717     | 363.676497       | <b>E</b> | 276.155397        | 138.581336      | 259.128848     | 130.068062       | 258.144832     | 129.576054       | <b>2</b> |
| 8 |            |                 |                |                  | <b>K</b> | 147.112804        | 74.060040       | 130.086255     | 65.546765        |                |                  | <b>1</b> |

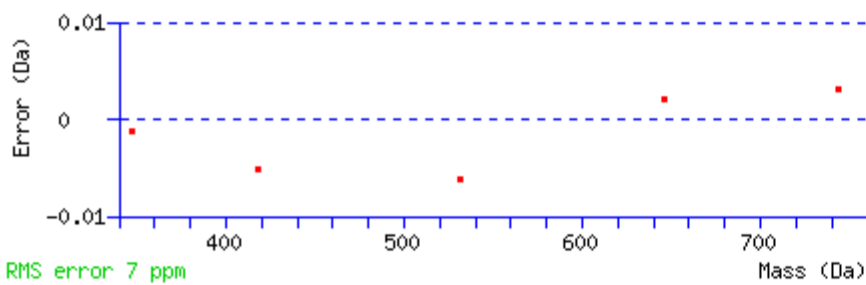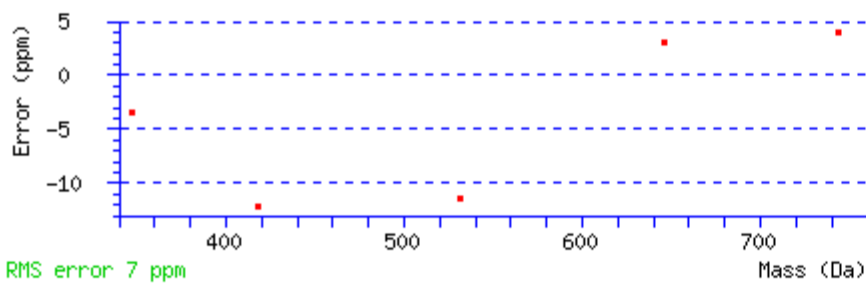

NCBI **BLAST** search of [FPDLAAEK](#)

(Parameters: blastp, nr protein database, expect=20000, no filter, PAM30)

Other BLAST [web gateways](#)

**All matches to this query**

| Score | Mr(calc):  | Delta     | Sequence                 |
|-------|------------|-----------|--------------------------|
| 39.7  | 889.454514 | -0.001326 | <a href="#">FPDLAAEK</a> |
| 18.5  | 889.450500 | 0.002688  | <a href="#">KQPSDTAK</a> |



# **MATRIX** SCIENCE Mascot Search Results

## Peptide View

MS/MS Fragmentation of **QGPAGLGPK**

Found in **CC88B\_HUMAN**, Coiled-coil domain-containing protein 88B OS=Homo sapiens GN=CCDC88B PE=1 SV=1

Match to Query 49924: 839.450788 from(420.732670,2+) rtinseconds(1047) index(244650)

Title: Locus:1.1.1.840.3

Data file C:\Program Files (x86)\Matrix Science\Mascot Daemon\mgf3 TFD - Epitel - R2\mascot\_daemon\_merge.mgf

Click mouse within plot area to zoom in by factor of two about that point

Or, Plot from  to  Da

Label all possible matches  Label matches used for scoring

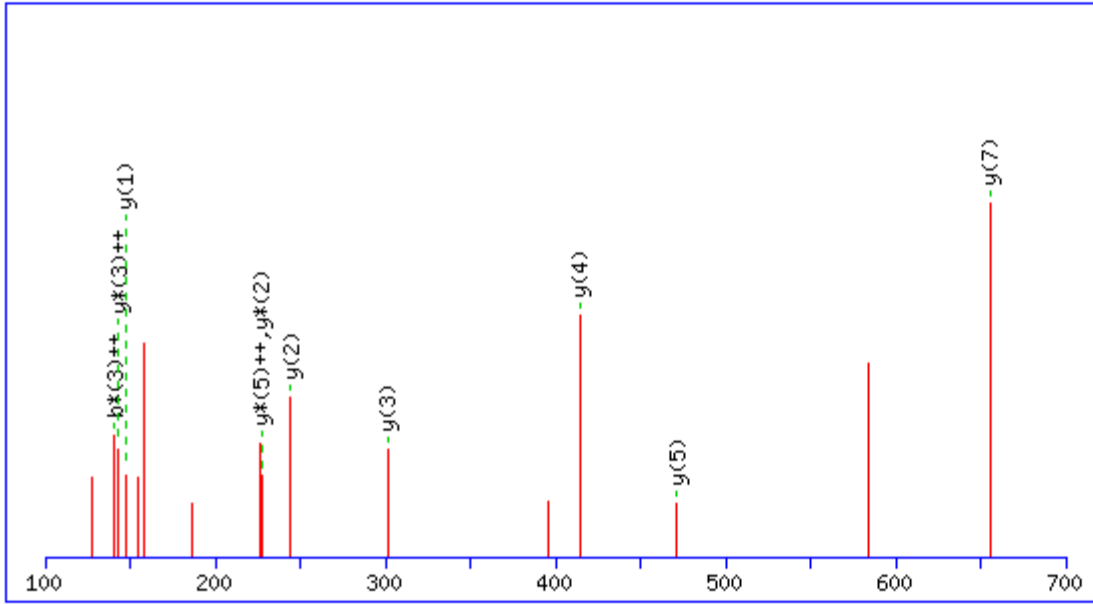

Monoisotopic mass of neutral peptide Mr(calc): 839.450119

Fixed modifications: Carbamidomethyl (C) (apply to specified residues or termini only)

Variable modifications:

P3 : Oxidation (P)

Ions Score: 47 Expect: 0.00015

Matches : 10/64 fragment ions using 13 most intense peaks ([help](#))

| # | b          | b <sup>++</sup> | b <sup>*</sup> | b <sup>++</sup> | Seq. | y          | y <sup>++</sup> | y <sup>*</sup> | y <sup>++</sup> | # |
|---|------------|-----------------|----------------|-----------------|------|------------|-----------------|----------------|-----------------|---|
| 1 | 129.065854 | 65.036565       | 112.039305     | 56.523291       | Q    |            |                 |                |                 | 9 |
| 2 | 186.087318 | 93.547297       | 169.060769     | 85.034023       | G    | 712.398817 | 356.703047      | 695.372268     | 348.189772      | 8 |
| 3 | 299.134997 | 150.071136      | 282.108448     | 141.557862      | P    | 655.377353 | 328.192315      | 638.350804     | 319.679040      | 7 |
| 4 | 370.172111 | 185.589694      | 353.145562     | 177.076419      | A    | 542.329674 | 271.668475      | 525.303125     | 263.155201      | 6 |
| 5 | 427.193575 | 214.100426      | 410.167026     | 205.587151      | G    | 471.292560 | 236.149918      | 454.266011     | 227.636643      | 5 |
| 6 | 540.277639 | 270.642458      | 523.251090     | 262.129183      | L    | 414.271096 | 207.639186      | 397.244547     | 199.125912      | 4 |
| 7 | 597.299103 | 299.153190      | 580.272554     | 290.639915      | G    | 301.187032 | 151.097154      | 284.160483     | 142.583880      | 3 |
| 8 | 694.351867 | 347.679572      | 677.325318     | 339.166297      | P    | 244.165568 | 122.586422      | 227.139019     | 114.073148      | 2 |
| 9 |            |                 |                |                 | K    | 147.112804 | 74.060040       | 130.086255     | 65.546765       | 1 |

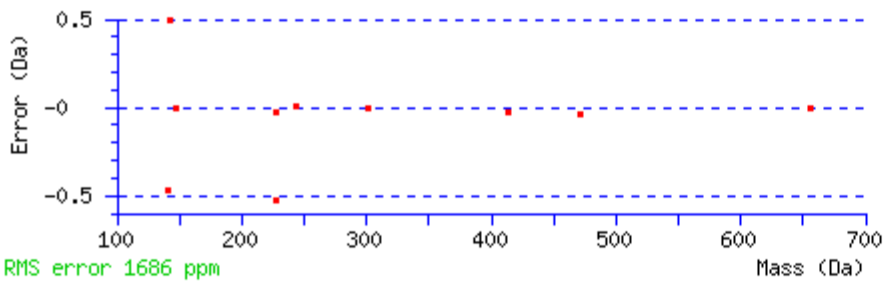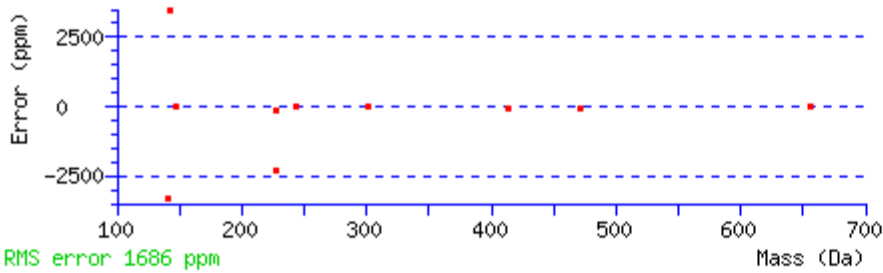

NCBI BLAST search of [QGPAGLGPK](#)

(Parameters: blastp, nr protein database, expect=20000, no filter, PAM30)

Other BLAST [web gateways](#)

All matches to this query

| Score | Mr(calc):  | Delta    | Sequence                  |
|-------|------------|----------|---------------------------|
| 46.9  | 839.450119 | 0.000669 | <a href="#">QGPAGLGPK</a> |
| 6.1   | 839.450089 | 0.000699 | <a href="#">SNAPNIPK</a>  |

# MASCOT Search Results

## Peptide View

MS/MS Fragmentation of **LGVPGLPGYPGR**

Found in **CO5A1\_HUMAN**, Collagen alpha-1(V) chain OS=Homo sapiens GN=COL5A1 PE=1 SV=3

Match to Query 28102: 1229.643888 from(615.829220,2+) rtinseconds(2336) index(25761)

Title: Locus:1.1.1.2444.38

Data file 2011-11-12 - TFD - EP 5-1.mgf

Click mouse within plot area to zoom in by factor of two about that point

Or, Plot from  to  Da

Label all possible matches  Label matches used for scoring

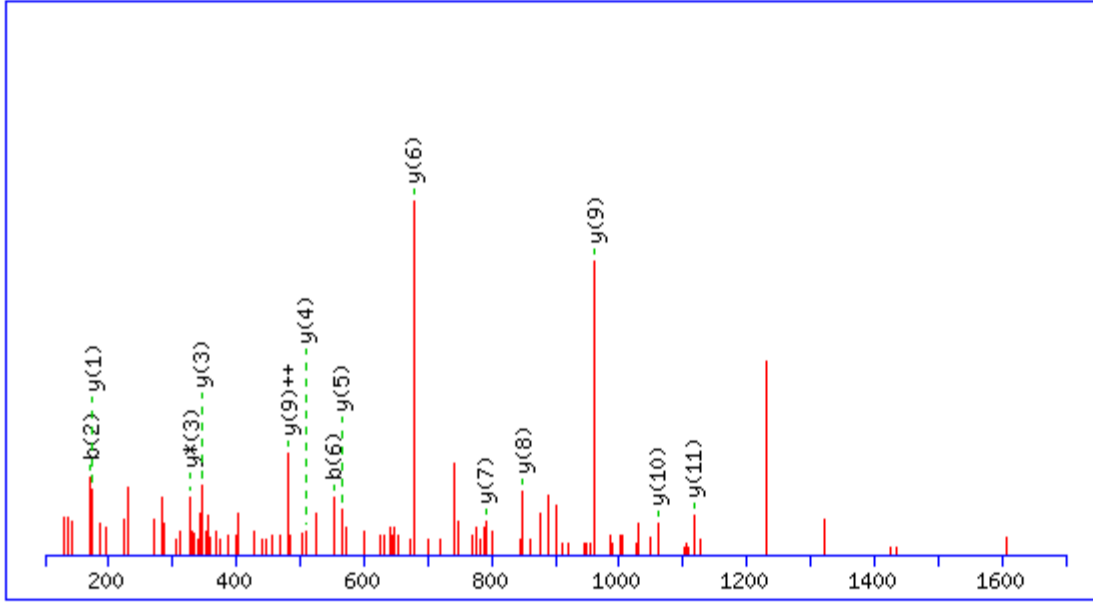

Monoisotopic mass of neutral peptide Mr(calc): 1229.640457

Fixed modifications: Propionamide (C) (apply to specified residues or termini only)

Variable modifications:

P4 : Oxidation (P)

P7 : Oxidation (P)

P10 : Oxidation (P)

Ions Score: 66 Expect: 6e-006

Matches : 14/66 fragment ions using 30 most intense peaks ([help](#))

| #  | b                 | b <sup>++</sup> | Seq. | y                  | y <sup>++</sup>   | y <sup>*</sup>    | y <sup>*++</sup> | #  |
|----|-------------------|-----------------|------|--------------------|-------------------|-------------------|------------------|----|
| 1  | 114.091340        | 57.549308       | L    |                    |                   |                   |                  | 12 |
| 2  | <b>171.112804</b> | 86.060040       | G    | <b>1117.563652</b> | 559.285464        | 1100.537103       | 550.772190       | 11 |
| 3  | 270.181218        | 135.594247      | V    | <b>1060.542188</b> | 530.774732        | 1043.515639       | 522.261458       | 10 |
| 4  | 383.228897        | 192.118087      | P    | <b>961.473774</b>  | <b>481.240525</b> | 944.447225        | 472.727250       | 9  |
| 5  | 440.250361        | 220.628818      | G    | <b>848.426095</b>  | 424.716685        | 831.399546        | 416.203411       | 8  |
| 6  | <b>553.334425</b> | 277.170851      | L    | <b>791.404631</b>  | 396.205953        | 774.378082        | 387.692679       | 7  |
| 7  | 666.382104        | 333.694690      | P    | <b>678.320567</b>  | 339.663922        | 661.294018        | 331.150647       | 6  |
| 8  | 723.403568        | 362.205422      | G    | <b>565.272888</b>  | 283.140082        | 548.246339        | 274.626807       | 5  |
| 9  | 886.466897        | 443.737087      | Y    | <b>508.251424</b>  | 254.629350        | 491.224875        | 246.116075       | 4  |
| 10 | 999.514576        | 500.260926      | P    | <b>345.188095</b>  | 173.097685        | <b>328.161546</b> | 164.584411       | 3  |
| 11 | 1056.536040       | 528.771658      | G    | 232.140416         | 116.573846        | 215.113867        | 108.060571       | 2  |
| 12 |                   |                 | R    | <b>175.118952</b>  | 88.063114         | 158.092403        | 79.549839        | 1  |

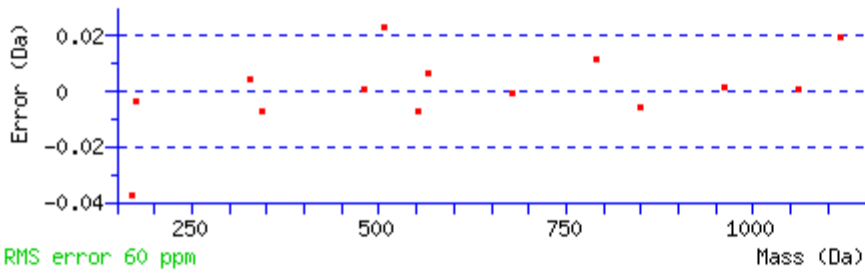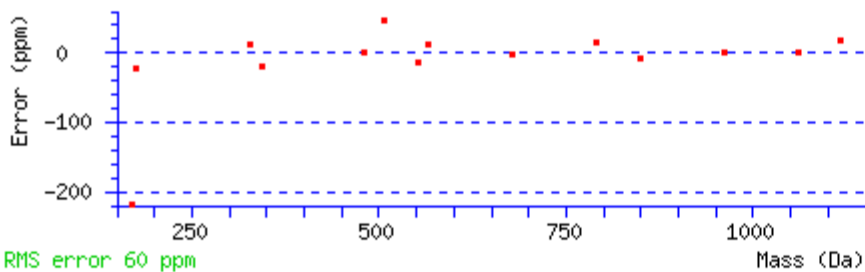

NCBI BLAST search of **LGVPGLPGYPGR**

(Parameters: blastp, nr protein database, expect=20000, no filter, PAM30)

Other BLAST [web gateways](#)

All matches to this query

| Score | Mr(calc):   | Delta     | Sequence                     |
|-------|-------------|-----------|------------------------------|
| 65.9  | 1229.640457 | 0.003431  | <a href="#">LGVPGLPGYPGR</a> |
| 8.9   | 1229.643768 | 0.000120  | <a href="#">LLEEICNLGR</a>   |
| 3.6   | 1229.651672 | -0.007784 | <a href="#">VPGEAFRPLGR</a>  |
| 2.8   | 1229.655045 | -0.011157 | <a href="#">VAVVCVSNVNR</a>  |

# MASCOT SCIENCE Mascot Search Results

## Peptide View

MS/MS Fragmentation of **IGLITDGGK**

Found in **COEAL\_HUMAN**, Collagen alpha-1(XIV) chain OS=Homo sapiens GN=COL14A1 PE=1 SV=3

Match to Query 8672: 928.557648 from(465.286100,2+) rtinseconds(1914) index(17887)

Title: Locus:1.1.1.2287.14

Data file 2011-11-12 - TFD - EP 5-1.mgf

Click mouse within plot area to zoom in by factor of two about that point

Or, Plot from  to  Da

Label all possible matches  Label matches used for scoring

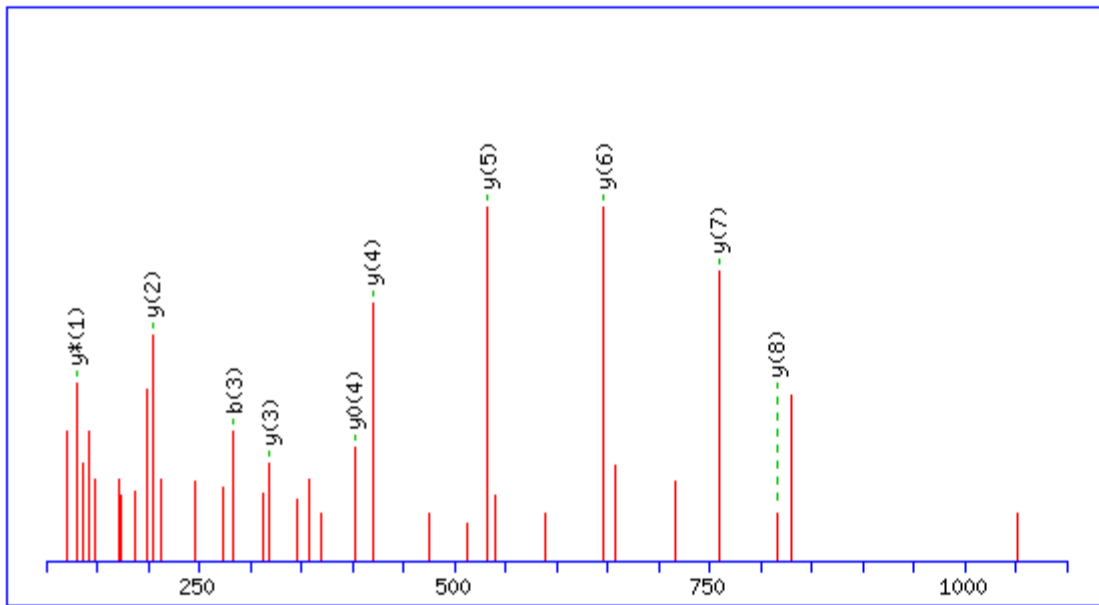

Monoisotopic mass of neutral peptide  $M_r(\text{calc})$ : 928.559326

Fixed modifications: Propionamide (C) (apply to specified residues or termini only)

Ions Score: 57 Expect: 1.2e-005

Matches : 10/66 fragment ions using 15 most intense peaks [\(help\)](#)

| # | b          | b <sup>++</sup> | b <sup>0</sup> | b <sup>0++</sup> | Seq. | y          | y <sup>++</sup> | y <sup>*</sup> | y <sup>+++</sup> | y <sup>0</sup> | y <sup>0++</sup> | # |
|---|------------|-----------------|----------------|------------------|------|------------|-----------------|----------------|------------------|----------------|------------------|---|
| 1 | 114.091340 | 57.549308       |                |                  | I    |            |                 |                |                  |                |                  | 9 |
| 2 | 171.112804 | 86.060040       |                |                  | G    | 816.482546 | 408.744911      | 799.455997     | 400.231637       | 798.471981     | 399.739629       | 8 |
| 3 | 284.196868 | 142.602072      |                |                  | I    | 759.461082 | 380.234179      | 742.434533     | 371.720905       | 741.450517     | 371.228897       | 7 |
| 4 | 397.280932 | 199.144104      |                |                  | L    | 646.377018 | 323.692147      | 629.350469     | 315.178873       | 628.366453     | 314.686865       | 6 |
| 5 | 510.364996 | 255.686136      |                |                  | I    | 533.292954 | 267.150115      | 516.266405     | 258.636841       | 515.282389     | 258.144833       | 5 |
| 6 | 611.412675 | 306.209976      | 593.402110     | 297.204693       | T    | 420.208890 | 210.608083      | 403.182341     | 202.094808       | 402.198325     | 201.602800       | 4 |
| 7 | 726.439618 | 363.723447      | 708.429053     | 354.718165       | D    | 319.161211 | 160.084243      | 302.134662     | 151.570969       | 301.150646     | 151.078961       | 3 |
| 8 | 783.461082 | 392.234179      | 765.450517     | 383.228897       | G    | 204.134268 | 102.570772      | 187.107719     | 94.057498        |                |                  | 2 |
| 9 |            |                 |                |                  | K    | 147.112804 | 74.060040       | 130.086255     | 65.546765        |                |                  | 1 |

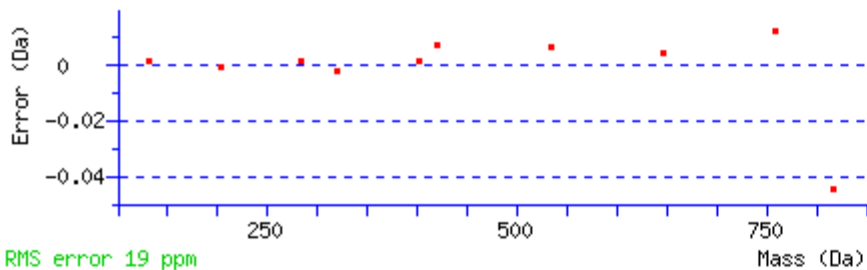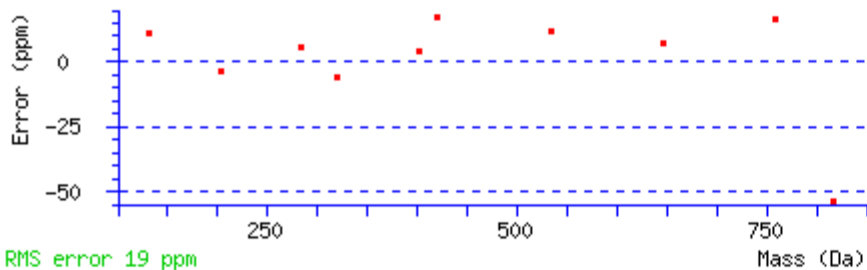

NCBI BLAST search of **IGLITDGGK**

(Parameters: blastp, nr protein database, expect=20000, no filter, PAM30)

Other BLAST [web gateways](#)

All matches to this query

| Score | $M_r(\text{calc})$ | Delta     | Sequence                   |
|-------|--------------------|-----------|----------------------------|
| 59.2  | 928.559326         | -0.001678 | <a href="#">VAIIITDGGK</a> |
| 56.9  | 928.559326         | -0.001678 | <a href="#">IGLITDGGK</a>  |
| 12.2  | 928.564011         | -0.006363 | <a href="#">LVALARMR</a>   |
| 7.5   | 928.549438         | 0.008210  | <a href="#">GIPFRPVK</a>   |
| 5.5   | 928.559311         | -0.001663 | <a href="#">IINILTDK</a>   |
| 5.5   | 928.559311         | -0.001663 | <a href="#">LQVLIESK</a>   |
| 4.7   | 928.549408         | 0.008240  | <a href="#">KYQIHLK</a>    |
| 2.0   | 928.559296         | -0.001648 | <a href="#">LVKELEAK</a>   |
| 1.4   | 928.559341         | -0.001693 | <a href="#">APVLTIVSK</a>  |
| 0.7   | 928.552780         | 0.004868  | <a href="#">IGLACLRL</a>   |

# MASCOT Search Results

## Peptide View

MS/MS Fragmentation of **QGGITSDQAAVISK**

Found in **COMD1\_HUMAN**, COMM domain-containing protein 1 OS=Homo sapiens GN=COMMD1 PE=1 SV=1

Match to Query 39615: 1373.724428 from(687.869490,2+) rtinseconds(1668) index(13215)

Title: Locus:1.1.1.1906.50

Data file 2011-11-14 - TFD - EP 8-6.mgf

Click mouse within plot area to zoom in by factor of two about that point

Or, Plot from  to  Da

Label all possible matches  Label matches used for scoring

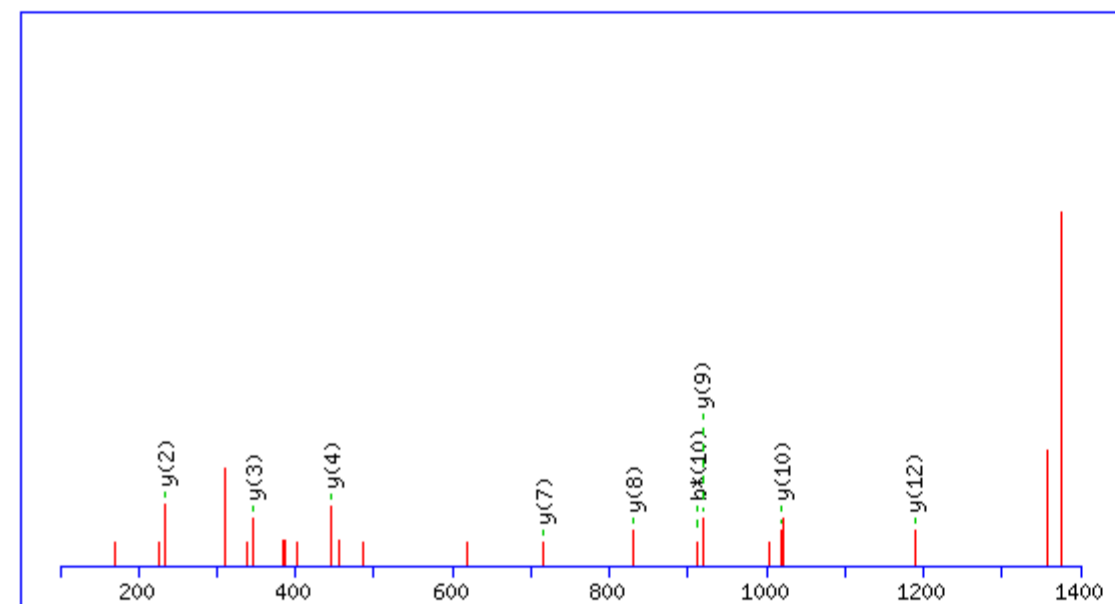

Monoisotopic mass of neutral peptide Mr(calc): 1373.715057

Fixed modifications: Propionamide (C) (apply to specified residues or termini only)

Ions Score: 56 Expect: 1.2e-005

Matches: 9/146 fragment ions using 16 most intense peaks [\(help\)](#)

| #  | b           | b <sup>++</sup> | b <sup>+</sup>    | b <sup>+++</sup> | b <sup>0</sup> | b <sup>0++</sup> | Seq. | y                  | y <sup>++</sup> | y <sup>+</sup> | y <sup>+++</sup> | y <sup>0</sup> | y <sup>0++</sup> | #  |
|----|-------------|-----------------|-------------------|------------------|----------------|------------------|------|--------------------|-----------------|----------------|------------------|----------------|------------------|----|
| 1  | 129.065854  | 65.036565       | 112.039305        | 56.523291        |                |                  | Q    |                    |                 |                |                  |                |                  | 14 |
| 2  | 186.087318  | 93.547297       | 169.060769        | 85.034023        |                |                  | G    | 1246.663758        | 623.835517      | 1229.637209    | 615.322243       | 1228.653193    | 614.830234       | 13 |
| 3  | 243.108782  | 122.058029      | 226.082233        | 113.544755       |                |                  | G    | <b>1189.642294</b> | 595.324785      | 1172.615745    | 586.811511       | 1171.631729    | 586.319503       | 12 |
| 4  | 356.192846  | 178.600061      | 339.166297        | 170.086787       |                |                  | I    | 1132.620830        | 566.814053      | 1115.594281    | 558.300779       | 1114.610265    | 557.808771       | 11 |
| 5  | 457.240525  | 229.123901      | 440.213976        | 220.610626       | 439.229960     | 220.118618       | T    | <b>1019.536766</b> | 510.272021      | 1002.510217    | 501.758746       | 1001.526201    | 501.266738       | 10 |
| 6  | 544.272553  | 272.639915      | 527.246004        | 264.126640       | 526.261988     | 263.634632       | S    | <b>918.489087</b>  | 459.748181      | 901.462538     | 451.234907       | 900.478522     | 450.742899       | 9  |
| 7  | 659.299496  | 330.153386      | 642.272947        | 321.640112       | 641.288931     | 321.148104       | D    | <b>831.457059</b>  | 416.232168      | 814.430510     | 407.718893       | 813.446494     | 407.226885       | 8  |
| 8  | 787.358074  | 394.182675      | 770.331525        | 385.669401       | 769.347509     | 385.177393       | Q    | <b>716.430116</b>  | 358.718696      | 699.403567     | 350.205422       | 698.419551     | 349.713414       | 7  |
| 9  | 858.395188  | 429.701232      | 841.368639        | 421.187958       | 840.384623     | 420.695950       | A    | 588.371538         | 294.689407      | 571.344989     | 286.176132       | 570.360973     | 285.684125       | 6  |
| 10 | 929.432302  | 465.219789      | <b>912.405753</b> | 456.706515       | 911.421737     | 456.214507       | A    | 517.334424         | 259.170850      | 500.307875     | 250.657576       | 499.323859     | 250.165568       | 5  |
| 11 | 1028.500716 | 514.753996      | 1011.474167       | 506.240722       | 1010.490151    | 505.748714       | V    | <b>446.297310</b>  | 223.652293      | 429.270761     | 215.139018       | 428.286745     | 214.647010       | 4  |
| 12 | 1141.584780 | 571.296028      | 1124.558231       | 562.782754       | 1123.574215    | 562.290745       | I    | <b>347.228896</b>  | 174.118086      | 330.202347     | 165.604811       | 329.218331     | 165.112803       | 3  |
| 13 | 1228.616808 | 614.812042      | 1211.590259       | 606.298768       | 1210.606243    | 605.806760       | S    | <b>234.144832</b>  | 117.576054      | 217.118283     | 109.062780       | 216.134267     | 108.570772       | 2  |
| 14 |             |                 |                   |                  |                |                  | K    | 147.112804         | 74.060040       | 130.086255     | 65.546765        |                |                  | 1  |

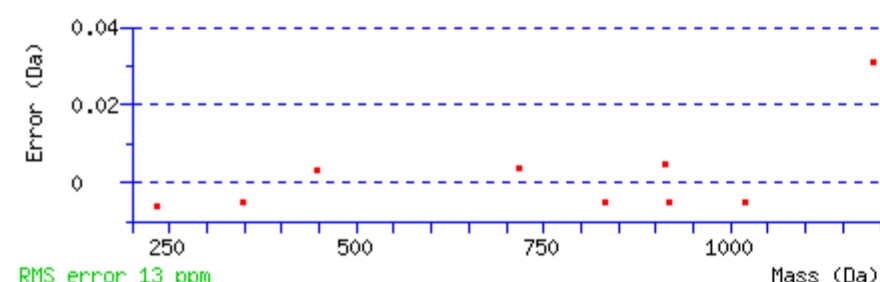

RMS error 13 ppm

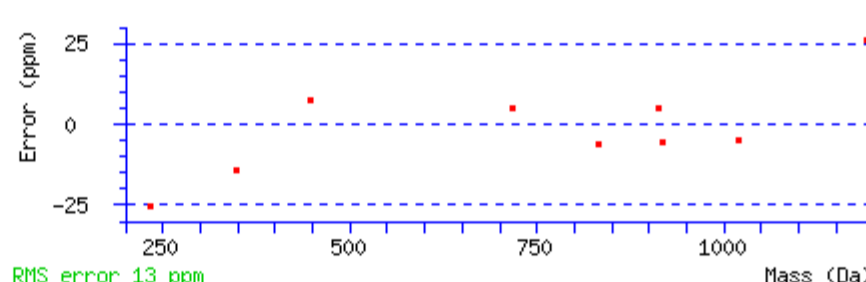

RMS error 13 ppm

NCBI BLAST search of **QGGITSDQAAVISK**

(Parameters: blastp, nr protein database, expect=20000, no filter, PAM30)

Other BLAST [web gateways](#)

All matches to this query

| Score | Mr(calc):   | Delta     | Sequence                        |
|-------|-------------|-----------|---------------------------------|
| 56.2  | 1373.715057 | 0.009371  | <a href="#">QGGITSDQAAVISK</a>  |
| 3.6   | 1373.715042 | 0.009386  | <a href="#">KPATSSKPGSAPSK</a>  |
| 1.2   | 1373.733658 | -0.009230 | <a href="#">GLNVAATAAVMAASK</a> |
| 1.1   | 1373.719757 | 0.004671  | <a href="#">SVALGGCGQLSRR</a>   |
| 0.5   | 1373.733673 | -0.009245 | <a href="#">AVLRSPGMTVAEK</a>   |
| 0.5   | 1373.733673 | -0.009245 | <a href="#">AVLRSPGMTVAEK</a>   |
| 0.0   | 1373.716385 | 0.008043  | <a href="#">SFSQSSGLLRHR</a>    |

# Mascot Search Results

## Peptide View

MS/MS Fragmentation of **AVSLINAIDTGR**

Found in **COMDA\_HUMAN**, COMM domain-containing protein 10 OS=Homo sapiens GN=COMMD10 PE=1 SV=1

Match to Query 30729: 1228.675848 from(615.345200,2+) rtinseconds(2786) index(33315)

Title: Locus:1.1.1.2645.27

Data file 2011-11-12 - TFD - EP 5-5.mgf

Click mouse within plot area to zoom in by factor of two about that point

Or, Plot from  to  Da

Label all possible matches  Label matches used for scoring

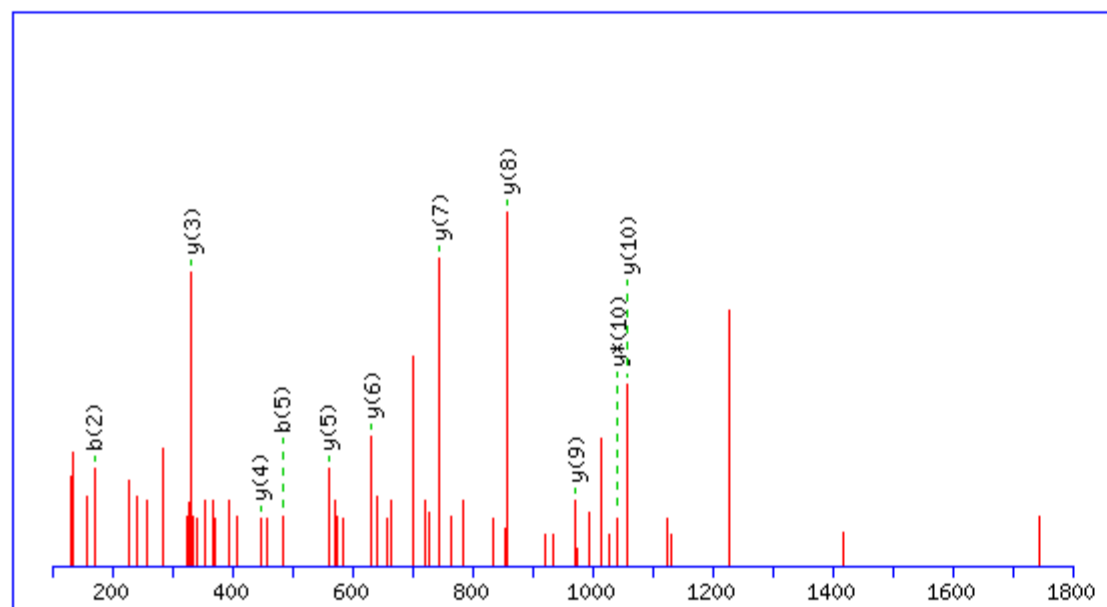

Monoisotopic mass of neutral peptide Mr(calc): 1228.677536

Fixed modifications: Propionamide (C) (apply to specified residues or termini only)

Ions Score: 53 Expect: 6.6e-005

Matches : 11/114 fragment ions using 21 most intense peaks [\(help\)](#)

| #  | b                 | b <sup>++</sup> | b*          | b <sup>+++</sup> | b <sup>0</sup> | b <sup>0++</sup> | Seq. | y                  | y <sup>++</sup> | y*                 | y <sup>+++</sup> | y <sup>0</sup> | y <sup>0++</sup> | #  |
|----|-------------------|-----------------|-------------|------------------|----------------|------------------|------|--------------------|-----------------|--------------------|------------------|----------------|------------------|----|
| 1  | 72.044390         | 36.525833       |             |                  |                |                  | A    |                    |                 |                    |                  |                |                  | 12 |
| 2  | <b>171.112804</b> | 86.060040       |             |                  |                |                  | V    | 1158.647713        | 579.827495      | 1141.621164        | 571.314220       | 1140.637148    | 570.822212       | 11 |
| 3  | 258.144832        | 129.576054      |             |                  | 240.134267     | 120.570772       | S    | <b>1059.579299</b> | 530.293288      | <b>1042.552750</b> | 521.780013       | 1041.568734    | 521.288005       | 10 |
| 4  | 371.228896        | 186.118086      |             |                  | 353.218331     | 177.112804       | L    | <b>972.547271</b>  | 486.777274      | 955.520722         | 478.263999       | 954.536706     | 477.771991       | 9  |
| 5  | <b>484.312960</b> | 242.660118      |             |                  | 466.302395     | 233.654836       | I    | <b>859.463207</b>  | 430.235242      | 842.436658         | 421.721967       | 841.452642     | 421.229959       | 8  |
| 6  | 598.355887        | 299.681582      | 581.329338  | 291.168307       | 580.345322     | 290.676299       | N    | <b>746.379143</b>  | 373.693210      | 729.352594         | 365.179935       | 728.368578     | 364.687927       | 7  |
| 7  | 669.393001        | 335.200139      | 652.366452  | 326.686864       | 651.382436     | 326.194856       | A    | <b>632.336216</b>  | 316.671746      | 615.309667         | 308.158472       | 614.325651     | 307.666464       | 6  |
| 8  | 782.477065        | 391.742171      | 765.450516  | 383.228896       | 764.466500     | 382.736888       | I    | <b>561.299102</b>  | 281.153189      | 544.272553         | 272.639915       | 543.288537     | 272.147907       | 5  |
| 9  | 897.504008        | 449.255642      | 880.477459  | 440.742368       | 879.493443     | 440.250360       | D    | <b>448.215038</b>  | 224.611157      | 431.188489         | 216.097882       | 430.204473     | 215.605874       | 4  |
| 10 | 998.551687        | 499.779482      | 981.525138  | 491.266207       | 980.541122     | 490.774199       | T    | <b>333.188095</b>  | 167.097685      | 316.161546         | 158.584411       | 315.177530     | 158.092403       | 3  |
| 11 | 1055.573151       | 528.290214      | 1038.546602 | 519.776939       | 1037.562586    | 519.284931       | G    | 232.140416         | 116.573846      | 215.113867         | 108.060571       |                |                  | 2  |
| 12 |                   |                 |             |                  |                |                  | R    | 175.118952         | 88.063114       | 158.092403         | 79.549839        |                |                  | 1  |

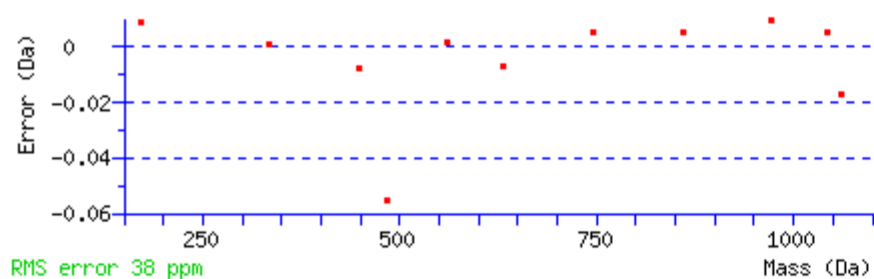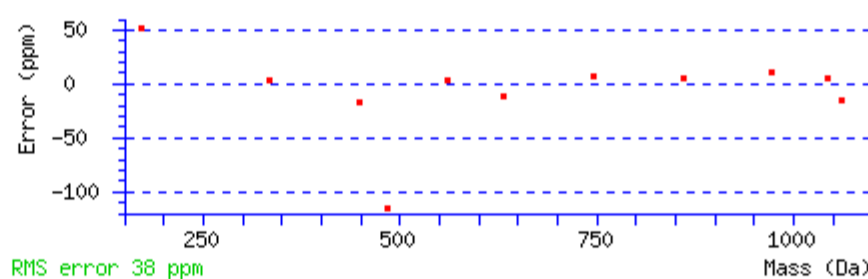

NCBI BLAST search of **AVSLINAIDTGR**

(Parameters: blastp, nr protein database, expect=20000, no filter, PAM30)

Other BLAST [web gateways](#)

All matches to this query

| Score | Mr(calc):   | Delta     | Sequence                     |
|-------|-------------|-----------|------------------------------|
| 53.5  | 1228.677536 | -0.001688 | <a href="#">AVSLINAIDTGR</a> |

Mascot: <http://www.matrixscience.com/>

# MASCOT Search Results

## Peptide View

MS/MS Fragmentation of **LGMAVSSDTCR**

Found in **COMD6\_HUMAN**, COMM domain-containing protein 6 OS=Homo sapiens GN=COMMD6 PE=1 SV=1

Match to Query 28204: 1225.543648 from(613.779100,2+) rtinseconds(1107) index(2357)

Title: Locus:1.1.1.1752.24

Data file 2011-11-12 - TFD - EP 6-7.mgf

Click mouse within plot area to zoom in by factor of two about that point

Or, Plot from  to  Da

Label all possible matches  Label matches used for scoring

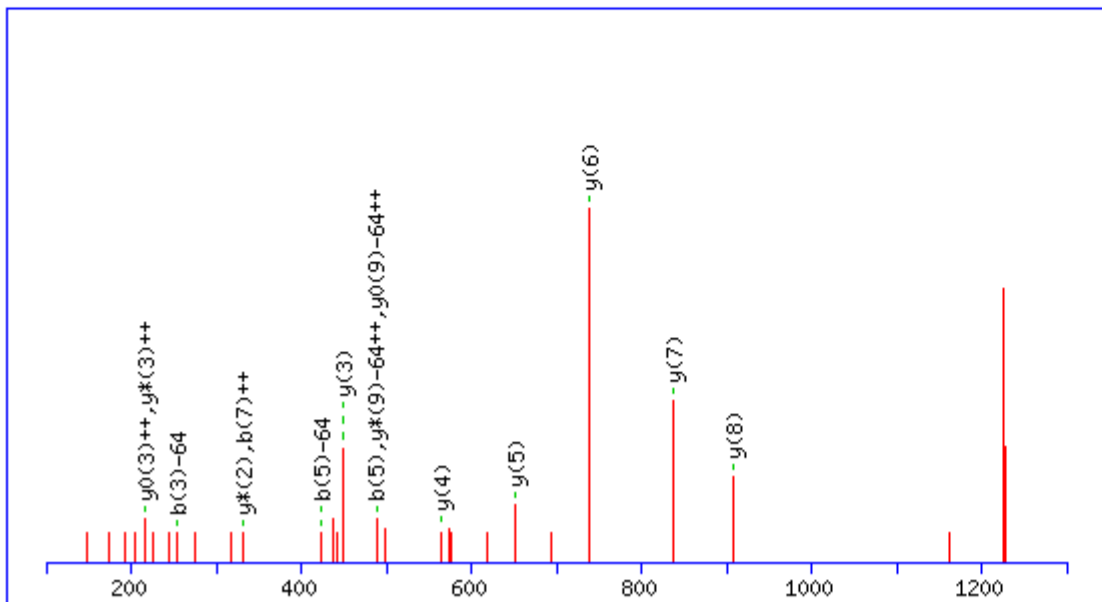

Monoisotopic mass of neutral peptide Mr(calc): 1225.543106

Fixed modifications: Propionamide (C) (apply to specified residues or termini only)

Variable modifications:

M3 : Oxidation (M), with neutral losses 63.998285 (shown in table), 0.000000

Ions Score: 53 Expect: 2.1e-005

Matches : 15/124 fragment ions using 15 most intense peaks ([help](#))

| #  | b                 | b <sup>++</sup> | b <sup>0</sup> | b <sup>0++</sup> | Seq. | y                 | y <sup>++</sup> | y <sup>*</sup>    | y <sup>*++</sup>  | y <sup>0</sup> | y <sup>0++</sup>  | #  |
|----|-------------------|-----------------|----------------|------------------|------|-------------------|-----------------|-------------------|-------------------|----------------|-------------------|----|
| 1  | 114.091340        | 57.549308       |                |                  | L    |                   |                 |                   |                   |                |                   | 11 |
| 2  | 171.112804        | 86.060040       |                |                  | G    | 1049.468036       | 525.237656      | 1032.441487       | 516.724382        | 1031.457471    | 516.232374        | 10 |
| 3  | <b>254.149919</b> | 127.578597      |                |                  | M    | 992.446572        | 496.726924      | 975.420023        | <b>488.213649</b> | 974.436007     | <b>487.721641</b> | 9  |
| 4  | 325.187033        | 163.097154      |                |                  | A    | <b>909.409457</b> | 455.208367      | 892.382908        | 446.695092        | 891.398892     | 446.203084        | 8  |
| 5  | <b>424.255447</b> | 212.631362      |                |                  | V    | <b>838.372343</b> | 419.689810      | 821.345794        | 411.176535        | 820.361778     | 410.684527        | 7  |
| 6  | 511.287475        | 256.147376      | 493.276910     | 247.142093       | S    | <b>739.303929</b> | 370.155602      | 722.277380        | 361.642328        | 721.293364     | 361.150320        | 6  |
| 7  | 598.319503        | 299.663390      | 580.308938     | 290.658107       | S    | <b>652.271901</b> | 326.639589      | 635.245352        | 318.126314        | 634.261336     | 317.634306        | 5  |
| 8  | 713.346446        | 357.176861      | 695.335881     | 348.171579       | D    | <b>565.239873</b> | 283.123575      | 548.213324        | 274.610300        | 547.229308     | 274.118292        | 4  |
| 9  | 814.394125        | 407.700701      | 796.383560     | 398.695418       | T    | <b>450.212930</b> | 225.610103      | 433.186381        | <b>217.096828</b> | 432.202365     | <b>216.604820</b> | 3  |
| 10 | 988.440424        | 494.723850      | 970.429859     | 485.718567       | C    | 349.165251        | 175.086263      | <b>332.138702</b> | 166.572989        |                |                   | 2  |
| 11 |                   |                 |                |                  | R    | 175.118952        | 88.063114       | 158.092403        | 79.549839         |                |                   | 1  |

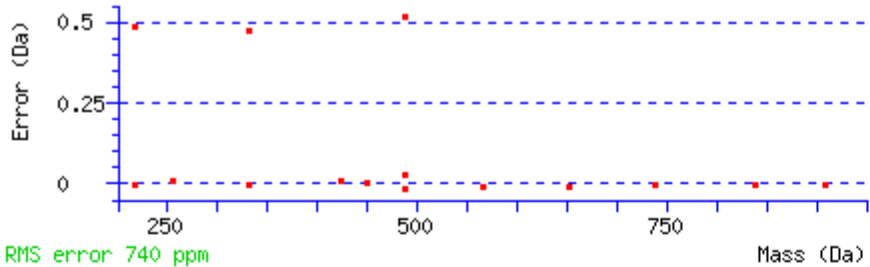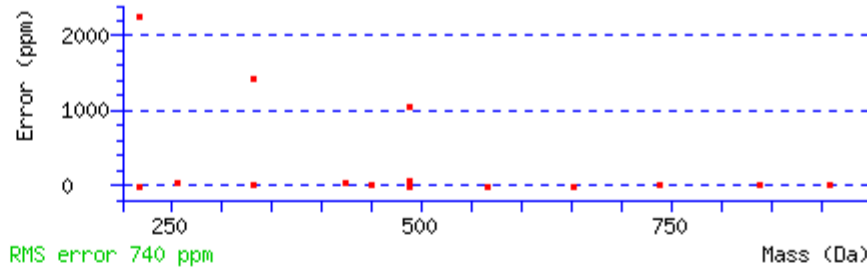

NCBI BLAST search of [LGMAVSSDTCR](#)

(Parameters: blastp, nr protein database, expect=20000, no filter, PAM30)

Other BLAST [web gateways](#)

All matches to this query

| Score | Mr(calc):   | Delta     | Sequence                       |
|-------|-------------|-----------|--------------------------------|
| 53.1  | 1225.543106 | 0.000542  | <a href="#">LGMAVSSDTCR</a>    |
| 7.7   | 1225.550980 | -0.007332 | <a href="#">MQPAPADGHVR</a>    |
| 3.2   | 1225.543610 | 0.000038  | <a href="#">GQSQSGGHGPGGGK</a> |
| 1.5   | 1225.531845 | 0.011803  | <a href="#">LLMNCSSEDK</a>     |
| 0.3   | 1225.547592 | -0.003944 | <a href="#">GDESGYRWTR</a>     |

Mascot: <http://www.matrixscience.com/>

# Mascot Search Results

## Peptide View

MS/MS Fragmentation of **TEAQANQISLPR**

Found in **COMD9\_HUMAN**, COMM domain-containing protein 9 OS=Homo sapiens GN=COMMD9 PE=1 SV=2

Match to Query 43147: 1326.677928 from(664.346240,2+) rtinseconds(1935) index(19604)

Title: Locus:1.1.1.1993.35

Data file 2011-11-10 - TFD - EP 4-6.mgf

Click mouse within plot area to zoom in by factor of two about that point

Or, Plot from  to  Da

Label all possible matches  Label matches used for scoring

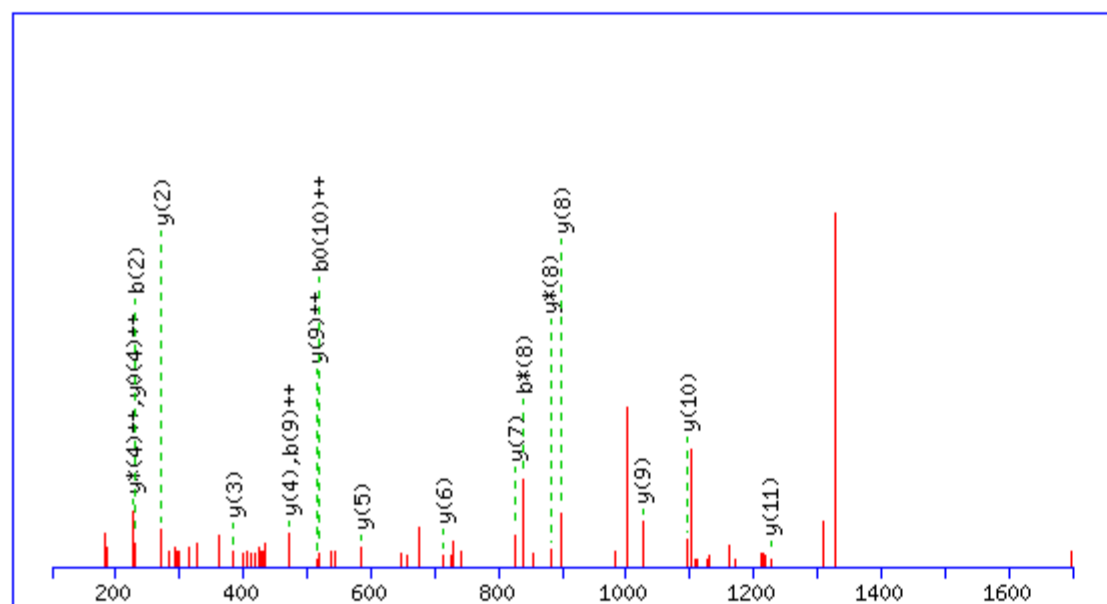

Monoisotopic mass of neutral peptide  $M_r(\text{calc})$ : 1326.689148

Fixed modifications: Propionamide (C) (apply to specified residues or termini only)

Ions Score: 51 Expect: 0.00022

Matches : 18/120 fragment ions using 41 most intense peaks ([help](#))

| #  | b           | b <sup>++</sup> | b <sup>*</sup> | b <sup>*++</sup> | b <sup>0</sup> | b <sup>0++</sup> | Seq. | y           | y <sup>++</sup> | y <sup>*</sup> | y <sup>*++</sup> | y <sup>0</sup> | y <sup>0++</sup> | #  |
|----|-------------|-----------------|----------------|------------------|----------------|------------------|------|-------------|-----------------|----------------|------------------|----------------|------------------|----|
| 1  | 102.054955  | 51.531116       |                |                  | 84.044390      | 42.525833        | T    |             |                 |                |                  |                |                  | 12 |
| 2  | 231.097548  | 116.052412      |                |                  | 213.086983     | 107.047130       | E    | 1226.648776 | 613.828026      | 1209.622227    | 605.314752       | 1208.638211    | 604.822744       | 11 |
| 3  | 302.134662  | 151.570969      |                |                  | 284.124097     | 142.565687       | A    | 1097.606183 | 549.306730      | 1080.579634    | 540.793455       | 1079.595618    | 540.301447       | 10 |
| 4  | 430.193240  | 215.600258      | 413.166691     | 207.086984       | 412.182675     | 206.594976       | Q    | 1026.569069 | 513.788173      | 1009.542520    | 505.274898       | 1008.558504    | 504.782890       | 9  |
| 5  | 501.230354  | 251.118815      | 484.203805     | 242.605540       | 483.219789     | 242.113532       | A    | 898.510491  | 449.758884      | 881.483942     | 441.245609       | 880.499926     | 440.753601       | 8  |
| 6  | 615.273281  | 308.140279      | 598.246732     | 299.627004       | 597.262716     | 299.134996       | N    | 827.473377  | 414.240327      | 810.446828     | 405.727052       | 809.462812     | 405.235044       | 7  |
| 7  | 743.331859  | 372.169568      | 726.305310     | 363.656293       | 725.321294     | 363.164285       | Q    | 713.430450  | 357.218863      | 696.403901     | 348.705589       | 695.419885     | 348.213581       | 6  |
| 8  | 856.415923  | 428.711600      | 839.389374     | 420.198325       | 838.405358     | 419.706317       | I    | 585.371872  | 293.189574      | 568.345323     | 284.676300       | 567.361307     | 284.184292       | 5  |
| 9  | 943.447951  | 472.227614      | 926.421402     | 463.714339       | 925.437386     | 463.222331       | S    | 472.287808  | 236.647542      | 455.261259     | 228.134267       | 454.277243     | 227.642259       | 4  |
| 10 | 1056.532015 | 528.769646      | 1039.505466    | 520.256371       | 1038.521450    | 519.764363       | L    | 385.255780  | 193.131528      | 368.229231     | 184.618253       |                |                  | 3  |
| 11 | 1153.584779 | 577.296028      | 1136.558230    | 568.782753       | 1135.574214    | 568.290745       | P    | 272.171716  | 136.589496      | 255.145167     | 128.076221       |                |                  | 2  |
| 12 |             |                 |                |                  |                |                  | R    | 175.118952  | 88.063114       | 158.092403     | 79.549839        |                |                  | 1  |

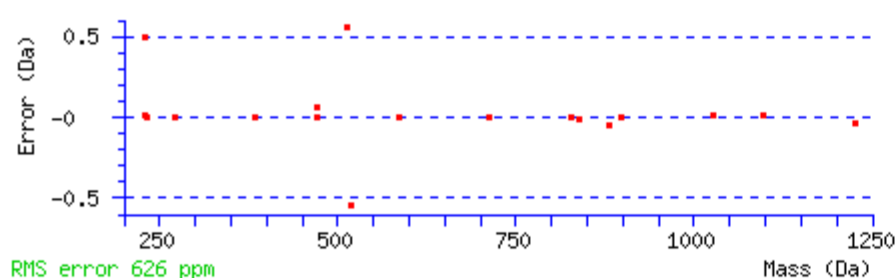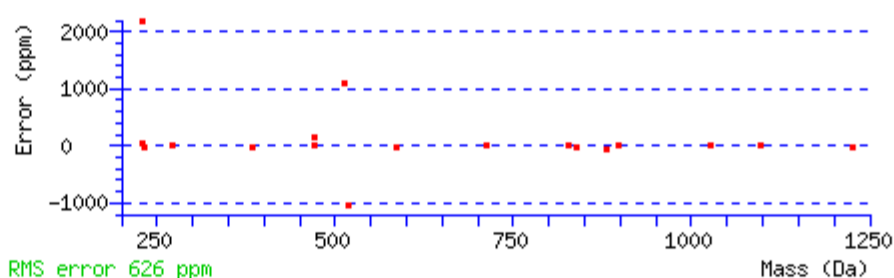

NCBI BLAST search of **TEAQANQISLPR**

(Parameters: blastp, nr protein database, expect=20000, no filter, PAM30)

Other BLAST [web gateways](#)

All matches to this query

| Score | $M_r(\text{calc})$ : | Delta     | Sequence                     |
|-------|----------------------|-----------|------------------------------|
| 50.5  | 1326.689148          | -0.011220 | <a href="#">TEAQANQISLPR</a> |
| 1.4   | 1326.679260          | -0.001332 | <a href="#">NGAGNWLAQQIR</a> |

# MASCOT SCIENCE Mascot Search Results

## Peptide View

MS/MS Fragmentation of **AVISPGFDVFAK**

Found in **CO2\_HUMAN**, Complement C2 OS=Homo sapiens GN=C2 PE=1 SV=2

Match to Query 34578: 1249.666568 from(625.840560,2+) rtinseconds(3164) index(43918)

Title: Locus:1.1.1.2626.23

Data file 2011-11-14 - TFD - EP 8-2.mgf

Click mouse within plot area to zoom in by factor of two about that point

Or, Plot from  to  Da

Label all possible matches  Label matches used for scoring

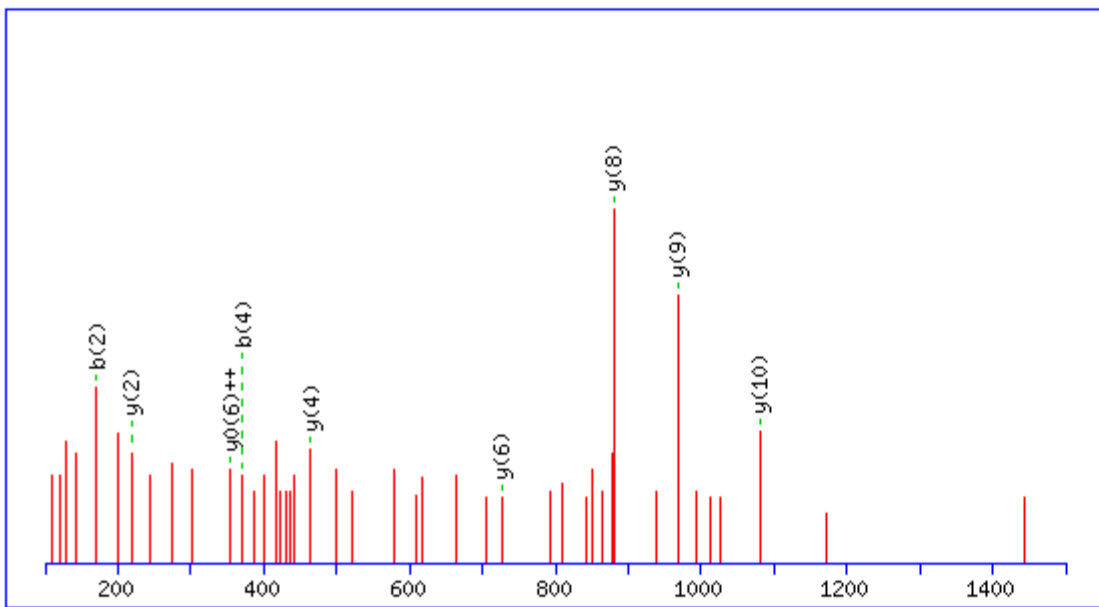

Monoisotopic mass of neutral peptide  $M_r(\text{calc})$ : 1249.670685

Fixed modifications: Propionamide (C) (apply to specified residues or termini only)

Ions Score: 31 Expect: 0.008

Matches : 9/96 fragment ions using 21 most intense peaks ([help](#))

| #  | b                 | b <sup>++</sup> | b <sup>0</sup> | b <sup>0++</sup> | Seq. | y                  | y <sup>++</sup> | y <sup>*</sup> | y <sup>*++</sup> | y <sup>0</sup> | y <sup>0++</sup>  | #  |
|----|-------------------|-----------------|----------------|------------------|------|--------------------|-----------------|----------------|------------------|----------------|-------------------|----|
| 1  | 72.044390         | 36.525833       |                |                  | A    |                    |                 |                |                  |                |                   | 12 |
| 2  | <b>171.112804</b> | 86.060040       |                |                  | V    | 1179.640837        | 590.324057      | 1162.614288    | 581.810782       | 1161.630272    | 581.318774        | 11 |
| 3  | 284.196868        | 142.602072      |                |                  | I    | <b>1080.572423</b> | 540.789850      | 1063.545874    | 532.276575       | 1062.561858    | 531.784567        | 10 |
| 4  | <b>371.228896</b> | 186.118086      | 353.218331     | 177.112804       | S    | <b>967.488359</b>  | 484.247818      | 950.461810     | 475.734543       | 949.477794     | 475.242535        | 9  |
| 5  | 468.281660        | 234.644468      | 450.271095     | 225.639186       | P    | <b>880.456331</b>  | 440.731804      | 863.429782     | 432.218529       | 862.445766     | 431.726521        | 8  |
| 6  | 525.303124        | 263.155200      | 507.292559     | 254.149918       | G    | 783.403567         | 392.205422      | 766.377018     | 383.692147       | 765.393002     | 383.200139        | 7  |
| 7  | 672.371538        | 336.689407      | 654.360973     | 327.684125       | F    | <b>726.382103</b>  | 363.694690      | 709.355554     | 355.181415       | 708.371538     | <b>354.689407</b> | 6  |
| 8  | 787.398481        | 394.202879      | 769.387916     | 385.197596       | D    | 579.313689         | 290.160483      | 562.287140     | 281.647208       | 561.303124     | 281.155200        | 5  |
| 9  | 886.466895        | 443.737086      | 868.456330     | 434.731803       | V    | <b>464.286746</b>  | 232.647011      | 447.260197     | 224.133737       |                |                   | 4  |
| 10 | 1033.535309       | 517.271293      | 1015.524744    | 508.266010       | F    | 365.218332         | 183.112804      | 348.191783     | 174.599530       |                |                   | 3  |
| 11 | 1104.572423       | 552.789850      | 1086.561858    | 543.784567       | A    | <b>218.149918</b>  | 109.578597      | 201.123369     | 101.065322       |                |                   | 2  |
| 12 |                   |                 |                |                  | K    | 147.112804         | 74.060040       | 130.086255     | 65.546765        |                |                   | 1  |

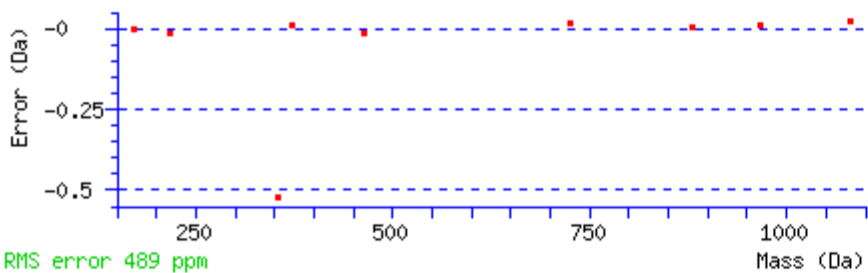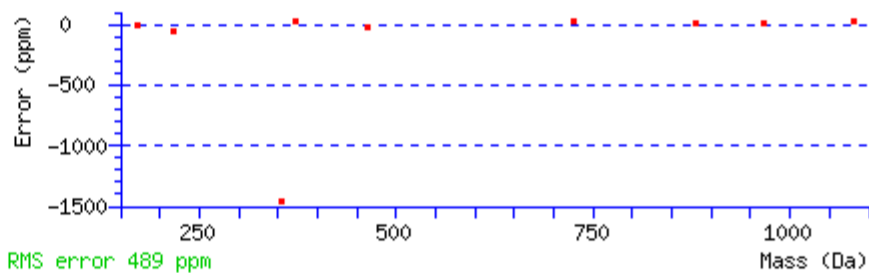

NCBI BLAST search of [AVISPGFDVFAK](#)

(Parameters: blastp, nr protein database, expect=20000, no filter, PAM30)

Other BLAST [web gateways](#)

## All matches to this query

| Score | $M_r(\text{calc})$ : | Delta     | Sequence                     |
|-------|----------------------|-----------|------------------------------|
| 30.6  | 1249.670685          | -0.004117 | <a href="#">AVISPGFDVFAK</a> |
| 8.2   | 1249.666611          | -0.000043 | <a href="#">KELSANTAFAK</a>  |

Mascot: <http://www.matrixscience.com/>



# MATRIX SCIENCE Mascot Search Results

## Peptide View

MS/MS Fragmentation of **LNLVATPLFLKPGIPYPIK**

Found in **COS\_HUMAN**, Complement C5 OS=Homo sapiens GN=C5 PE=1 SV=4

Match to Query 66113: 2093.263362 from(698.761730,3+) rtinseconds(3799) index(55427)

Title: Locus:1.1.1.2826.25

Data file 2011-11-12 - TFD - EP 6-2.mgf

Click mouse within plot area to zoom in by factor of two about that point

Or, Plot from  to  Da

Label all possible matches  Label matches used for scoring

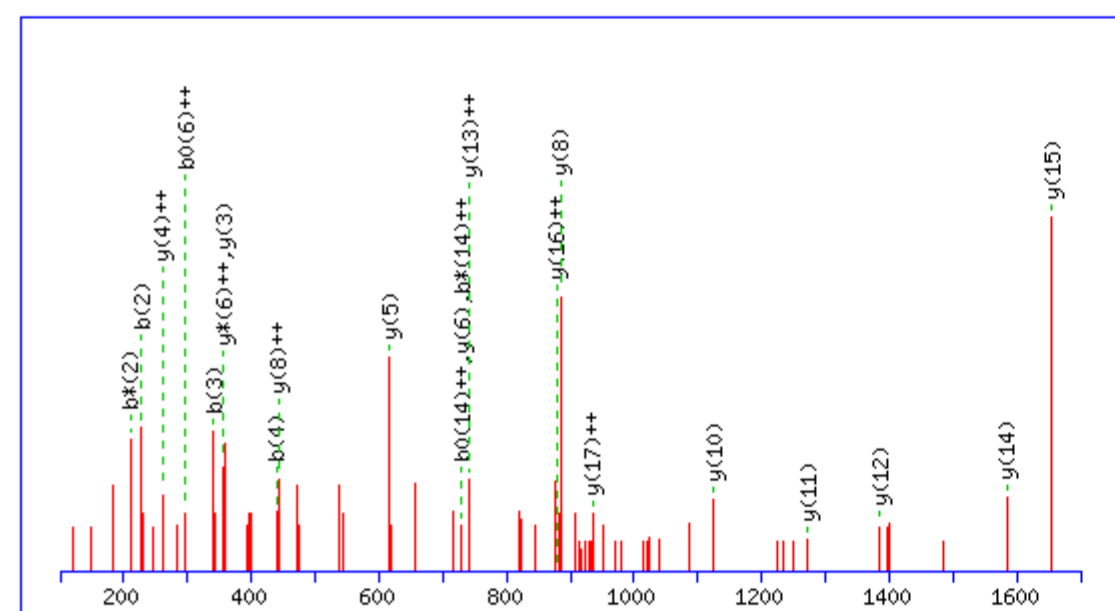

Monoisotopic mass of neutral peptide Mr(calc): 2093.265244

Fixed modifications: Propionamide (C) (apply to specified residues or termini only)

Ions Score: 53 Expect: 4.9e-006

Matches: 22/178 fragment ions using 39 most intense peaks [\(help\)](#)

| #  | b                 | b <sup>++</sup> | b <sup>*</sup>    | b <sup>*++</sup>  | b <sup>0</sup> | b <sup>0++</sup>  | Seq. | y                  | y <sup>++</sup>   | y <sup>*</sup> | y <sup>*++</sup>  | y <sup>0</sup> | y <sup>0++</sup> | #  |
|----|-------------------|-----------------|-------------------|-------------------|----------------|-------------------|------|--------------------|-------------------|----------------|-------------------|----------------|------------------|----|
| 1  | 114.091340        | 57.549308       |                   |                   |                |                   | L    |                    |                   |                |                   |                |                  | 19 |
| 2  | <b>228.134267</b> | 114.570771      | <b>211.107718</b> | 106.057497        |                |                   | N    | 1981.188484        | 991.097880        | 1964.161935    | 982.584606        | 1963.177919    | 982.092598       | 18 |
| 3  | <b>341.218331</b> | 171.112803      | 324.191782        | 162.599529        |                |                   | L    | 1867.145557        | <b>934.076417</b> | 1850.119008    | 925.563142        | 1849.134992    | 925.071134       | 17 |
| 4  | <b>440.286745</b> | 220.647010      | 423.260196        | 212.133736        |                |                   | V    | 1754.061493        | <b>877.534385</b> | 1737.034944    | 869.021110        | 1736.050928    | 868.529102       | 16 |
| 5  | 511.323859        | 256.165568      | 494.297310        | 247.652293        |                |                   | A    | <b>1654.993079</b> | 828.000178        | 1637.966530    | 819.486903        | 1636.982514    | 818.994895       | 15 |
| 6  | 612.371538        | 306.689407      | 595.344989        | 298.176133        | 594.360973     | <b>297.684125</b> | T    | <b>1583.955965</b> | 792.481621        | 1566.929416    | 783.968346        | 1565.945400    | 783.476338       | 14 |
| 7  | 709.424302        | 355.215789      | 692.397753        | 346.702515        | 691.413737     | 346.210507        | P    | 1482.908286        | <b>741.957781</b> | 1465.881737    | 733.444507        |                |                  | 13 |
| 8  | 822.508366        | 411.757821      | 805.481817        | 403.244547        | 804.497801     | 402.752539        | L    | <b>1385.855522</b> | 693.431399        | 1368.828973    | 684.918125        |                |                  | 12 |
| 9  | 969.576780        | 485.292028      | 952.550231        | 476.778754        | 951.566215     | 476.286746        | F    | <b>1272.771458</b> | 636.889367        | 1255.744909    | 628.376093        |                |                  | 11 |
| 10 | 1082.660844       | 541.834060      | 1065.634295       | 533.320786        | 1064.650279    | 532.828778        | L    | <b>1125.703044</b> | 563.355160        | 1108.676495    | 554.841886        |                |                  | 10 |
| 11 | 1210.755807       | 605.881542      | 1193.729258       | 597.368267        | 1192.745242    | 596.876259        | K    | 1012.618980        | 506.813128        | 995.592431     | 498.299854        |                |                  | 9  |
| 12 | 1307.808571       | 654.407924      | 1290.782022       | 645.894649        | 1289.798006    | 645.402641        | P    | <b>884.524017</b>  | <b>442.765647</b> | 867.497468     | 434.252372        |                |                  | 8  |
| 13 | 1364.830035       | 682.918656      | 1347.803486       | 674.405381        | 1346.819470    | 673.913373        | G    | 787.471253         | 394.239265        | 770.444704     | 385.725990        |                |                  | 7  |
| 14 | 1477.914099       | 739.460687      | 1460.887550       | <b>730.947413</b> | 1459.903534    | <b>730.455405</b> | I    | <b>730.449789</b>  | 365.728533        | 713.423240     | <b>357.215258</b> |                |                  | 6  |
| 15 | 1574.966863       | 787.987069      | 1557.940314       | 779.473795        | 1556.956298    | 778.981787        | P    | <b>617.365725</b>  | 309.186501        | 600.339176     | 300.673226        |                |                  | 5  |
| 16 | 1738.030192       | 869.518734      | 1721.003643       | 861.005460        | 1720.019627    | 860.513451        | Y    | 520.312961         | <b>260.660119</b> | 503.286412     | 252.146844        |                |                  | 4  |
| 17 | 1835.082956       | 918.045116      | 1818.056407       | 909.531842        | 1817.072391    | 909.039833        | P    | <b>357.249632</b>  | 179.128454        | 340.223083     | 170.615180        |                |                  | 3  |
| 18 | 1948.167020       | 974.587148      | 1931.140471       | 966.073873        | 1930.156455    | 965.581865        | I    | 260.196868         | 130.602072        | 243.170319     | 122.088798        |                |                  | 2  |
| 19 |                   |                 |                   |                   |                |                   | K    | 147.112804         | 74.060040         | 130.086255     | 65.546766         |                |                  | 1  |

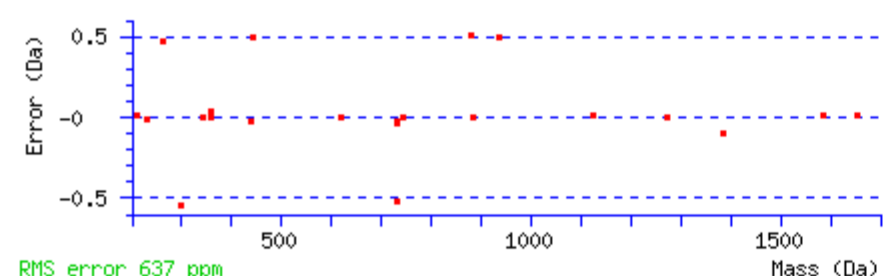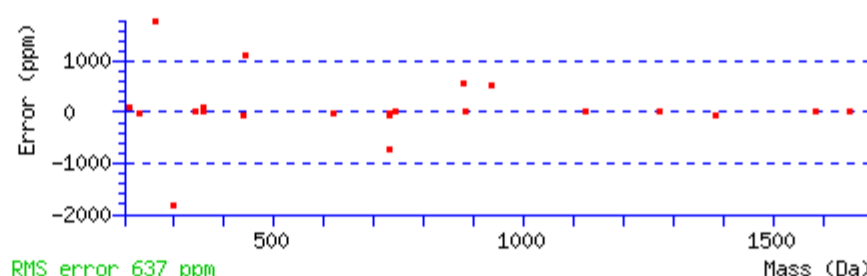

NCBI BLAST search of [LNLVATPLFLKPGIPYPIK](#)

(Parameters: blastp, nr protein database, expect=20000, no filter, PAM30)

Other BLAST [web gateways](#)

## All matches to this query

| Score | Mr(calc):   | Delta     | Sequence                            |
|-------|-------------|-----------|-------------------------------------|
| 53.1  | 2093.265244 | -0.001882 | <a href="#">LNLVATPLFLKPGIPYPIK</a> |

Mascot: <http://www.matrixscience.com/>

# MASCOT SCIENCE Mascot Search Results

## Peptide View

MS/MS Fragmentation of **TGESAEFVCK**

Found in **FHR1\_HUMAN**, Complement factor H-related protein 1 OS=Homo sapiens GN=CFHR1 PE=1 SV=2

Match to Query 427298: 1126.502168 from(564.258360,2+) rtinseconds(1374) index(335559)

Title: Locus:1.1.1.859.31

Data file C:\Program Files (x86)\Matrix Science\Mascot Daemon\mgf\3 TFD - Epitel - R2\mascot\_daemon\_merge.mgf

Click mouse within plot area to zoom in by factor of two about that point

Or, Plot from  to  Da

Label all possible matches  Label matches used for scoring

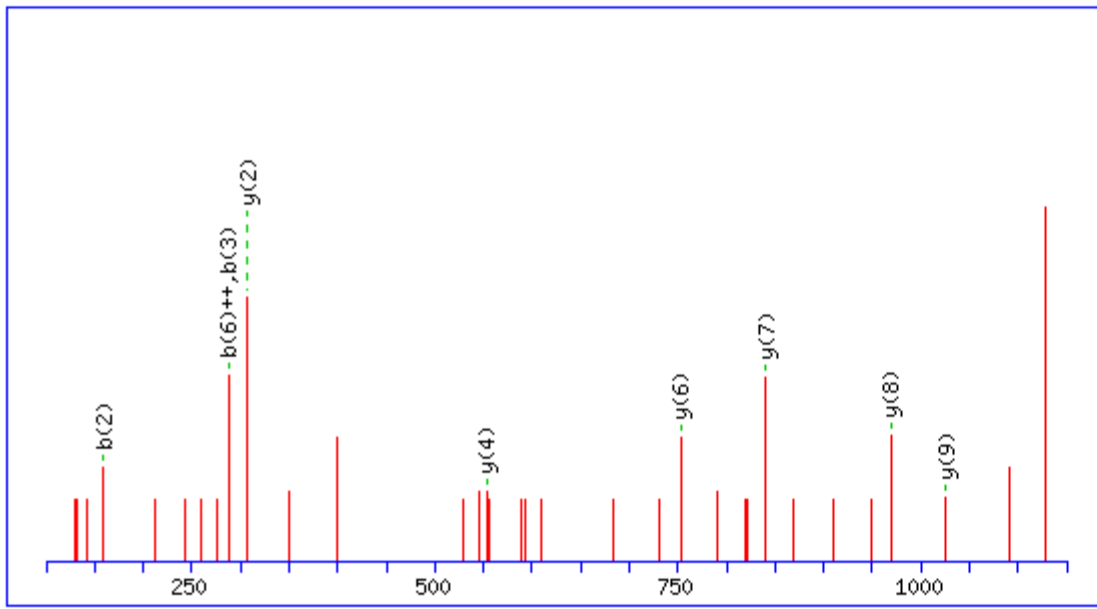

Monoisotopic mass of neutral peptide Mr(calc): 1126.496475

Fixed modifications: Carbamidomethyl (C) (apply to specified residues or termini only)

Ions Score: 37 Expect: 0.0015

Matches : 9/82 fragment ions using 17 most intense peaks [\(help\)](#)

| #  | b                 | b <sup>++</sup>   | b <sup>0</sup> | b <sup>0++</sup> | Seq. | y                  | y <sup>++</sup> | y <sup>*</sup> | y <sup>++</sup> | y <sup>0</sup> | y <sup>0++</sup> | #  |
|----|-------------------|-------------------|----------------|------------------|------|--------------------|-----------------|----------------|-----------------|----------------|------------------|----|
| 1  | 102.054955        | 51.531116         | 84.044390      | 42.525833        | T    |                    |                 |                |                 |                |                  | 10 |
| 2  | <b>159.076419</b> | 80.041847         | 141.065854     | 71.036565        | G    | <b>1026.456073</b> | 513.731675      | 1009.429524    | 505.218400      | 1008.445508    | 504.726392       | 9  |
| 3  | <b>288.119012</b> | 144.563144        | 270.108447     | 135.557862       | E    | <b>969.434609</b>  | 485.220943      | 952.408060     | 476.707668      | 951.424044     | 476.215660       | 8  |
| 4  | 375.151040        | 188.079158        | 357.140475     | 179.073876       | S    | <b>840.392016</b>  | 420.699646      | 823.365467     | 412.186372      | 822.381451     | 411.694364       | 7  |
| 5  | 446.188154        | 223.597715        | 428.177589     | 214.592433       | A    | <b>753.359988</b>  | 377.183632      | 736.333439     | 368.670358      | 735.349423     | 368.178350       | 6  |
| 6  | 575.230747        | <b>288.119012</b> | 557.220182     | 279.113729       | E    | 682.322874         | 341.665075      | 665.296325     | 333.151801      | 664.312309     | 332.659793       | 5  |
| 7  | 722.299161        | 361.653219        | 704.288596     | 352.647936       | F    | <b>553.280281</b>  | 277.143779      | 536.253732     | 268.630504      |                |                  | 4  |
| 8  | 821.367575        | 411.187426        | 803.357010     | 402.182143       | V    | 406.211867         | 203.609571      | 389.185318     | 195.096297      |                |                  | 3  |
| 9  | 981.398224        | 491.202750        | 963.387659     | 482.197468       | C    | <b>307.143453</b>  | 154.075365      | 290.116904     | 145.562090      |                |                  | 2  |
| 10 |                   |                   |                |                  | K    | 147.112804         | 74.060040       | 130.086255     | 65.546765       |                |                  | 1  |

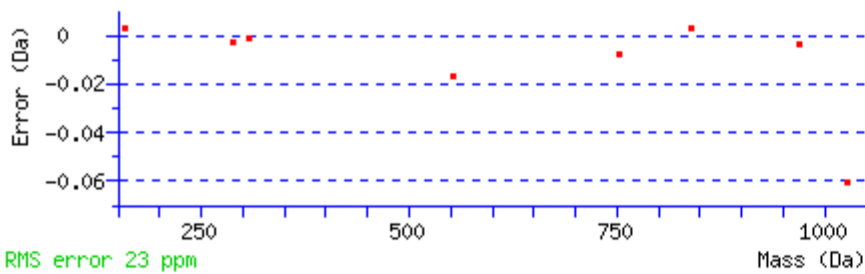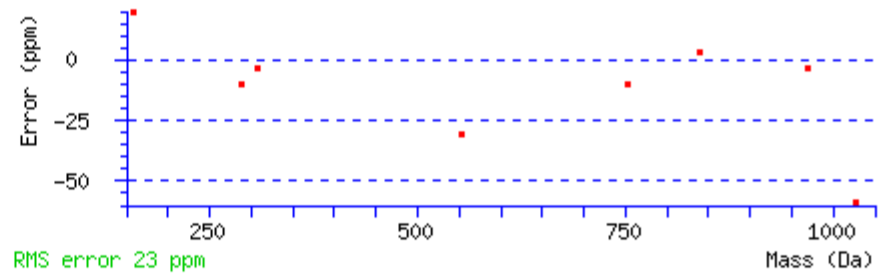

NCBI BLAST search of **TGESAEFVCK**

(Parameters: blastp, nr protein database, expect=20000, no filter, PAM30)

Other BLAST [web gateways](#)

All matches to this query

| Score | Mr(calc):   | Delta    | Sequence                   |
|-------|-------------|----------|----------------------------|
| 37.0  | 1126.496475 | 0.005693 | <a href="#">TGESAEFVCK</a> |

Mascot: <http://www.matrixscience.com/>

# **MASCOT** Mascot Search Results

## Peptide View

MS/MS Fragmentation of **CAAGLAELAAR**

Found in **CSNI\_HUMAN**, COP9 signalosome complex subunit 1 OS=Homo sapiens GN=GPS1 PE=1 SV=4

Match to Query 20894: 1115.575228 from(558.794890,2+) rtinseconds(2139) index(25525)

Title: Locus:1.1.1.2184.25

Data file 2011-11-12 - TFD - EP 6-3.mgf

Click mouse within plot area to zoom in by factor of two about that point

Or, Plot from  to  Da

Label all possible matches  Label matches used for scoring

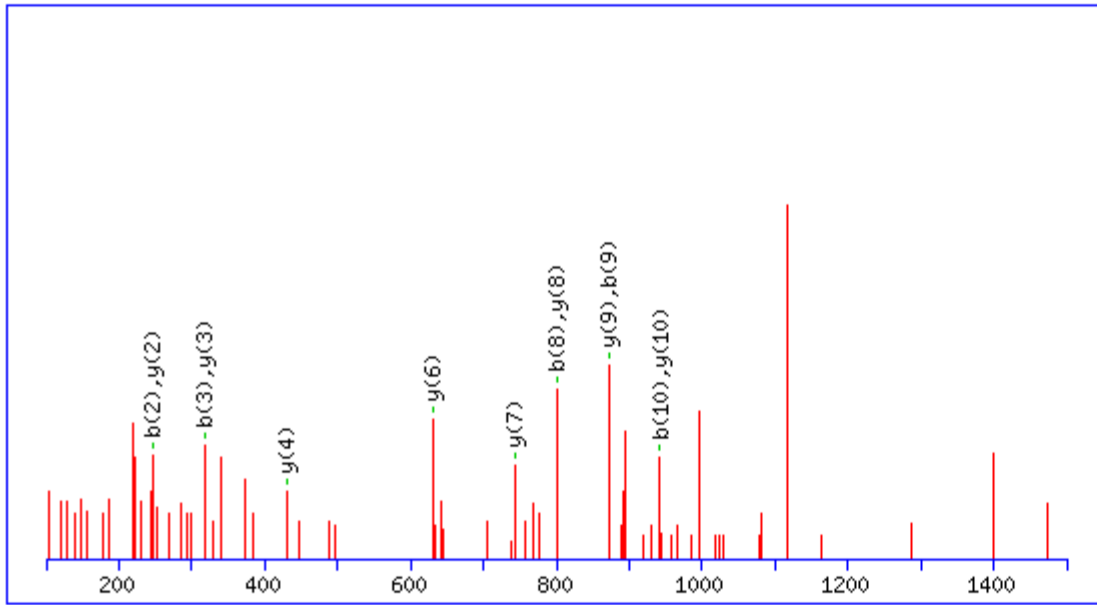

Monoisotopic mass of neutral peptide Mr(calc): 1115.575684

Fixed modifications: Propionamide (C) (apply to specified residues or termini only)

Ions Score: 55 Expect: 6.2e-005

Matches : 13/80 fragment ions using 18 most intense peaks ([help](#))

| #  | b                 | b <sup>++</sup> | b <sup>0</sup> | b <sup>0++</sup> | Seq. | y                 | y <sup>++</sup> | y <sup>*</sup> | y <sup>*++</sup> | y <sup>0</sup> | y <sup>0++</sup> | #  |
|----|-------------------|-----------------|----------------|------------------|------|-------------------|-----------------|----------------|------------------|----------------|------------------|----|
| 1  | 175.053575        | 88.030425       |                |                  | C    |                   |                 |                |                  |                |                  | 11 |
| 2  | <b>246.090689</b> | 123.548982      |                |                  | A    | <b>942.536707</b> | 471.771992      | 925.510158     | 463.258717       | 924.526142     | 462.766709       | 10 |
| 3  | <b>317.127803</b> | 159.067540      |                |                  | A    | <b>871.499593</b> | 436.253435      | 854.473044     | 427.740160       | 853.489028     | 427.248152       | 9  |
| 4  | 374.149267        | 187.578272      |                |                  | G    | <b>800.462479</b> | 400.734878      | 783.435930     | 392.221603       | 782.451914     | 391.729595       | 8  |
| 5  | 487.233331        | 244.120304      |                |                  | L    | <b>743.441015</b> | 372.224146      | 726.414466     | 363.710871       | 725.430450     | 363.218863       | 7  |
| 6  | 558.270445        | 279.638861      |                |                  | A    | <b>630.356951</b> | 315.682114      | 613.330402     | 307.168839       | 612.346386     | 306.676831       | 6  |
| 7  | 687.313038        | 344.160157      | 669.302473     | 335.154875       | E    | 559.319837        | 280.163557      | 542.293288     | 271.650282       | 541.309272     | 271.158274       | 5  |
| 8  | <b>800.397102</b> | 400.702189      | 782.386537     | 391.696907       | L    | <b>430.277244</b> | 215.642260      | 413.250695     | 207.128985       |                |                  | 4  |
| 9  | <b>871.434216</b> | 436.220746      | 853.423651     | 427.215464       | A    | <b>317.193180</b> | 159.100228      | 300.166631     | 150.586953       |                |                  | 3  |
| 10 | <b>942.471330</b> | 471.739303      | 924.460765     | 462.734021       | A    | <b>246.156066</b> | 123.581671      | 229.129517     | 115.068396       |                |                  | 2  |
| 11 |                   |                 |                |                  | R    | 175.118952        | 88.063114       | 158.092403     | 79.549839        |                |                  | 1  |

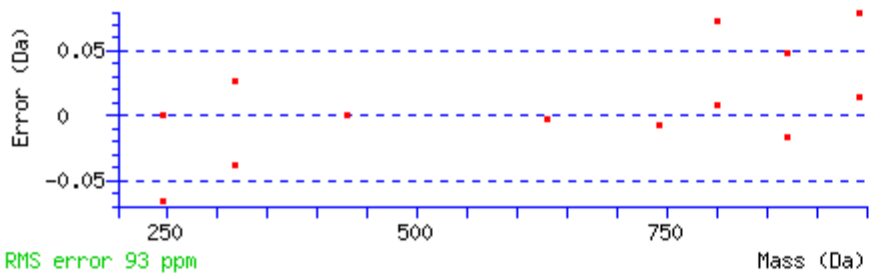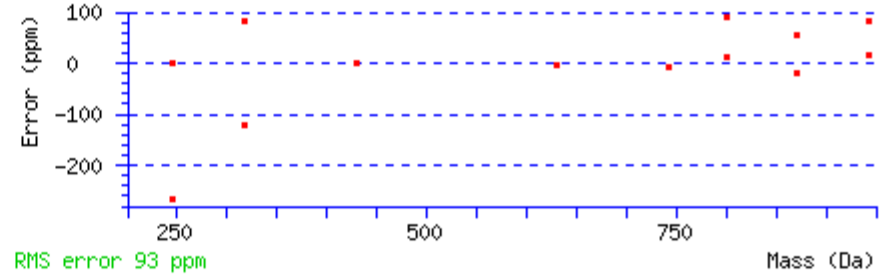

NCBI BLAST search of [CAAGLAELAAR](#)

(Parameters: blastp, nr protein database, expect=20000, no filter, PAM30)

Other BLAST [web gateways](#)

## All matches to this query

| Score | Mr(calc):   | Delta     | Sequence                     |
|-------|-------------|-----------|------------------------------|
| 54.5  | 1115.575684 | -0.000456 | <a href="#">CAAGLAELAAR</a>  |
| 15.7  | 1115.575684 | -0.000456 | <a href="#">MNEIQAI AAR</a>  |
| 14.2  | 1115.582260 | -0.007032 | <a href="#">SLGTAGPPSAVK</a> |
| 13.0  | 1115.564484 | 0.010744  | <a href="#">ALNMAIPGGPK</a>  |
| 7.0   | 1115.586288 | -0.011060 | <a href="#">LPFDTPPIGK</a>   |
| 5.8   | 1115.575714 | -0.000486 | <a href="#">ACAAGTPAVIR</a>  |
| 4.8   | 1115.572357 | 0.002871  | <a href="#">EVQTWVQAR</a>    |
| 4.5   | 1115.583572 | -0.008344 | <a href="#">TFPNAPRAAR</a>   |
| 4.5   | 1115.583572 | -0.008344 | <a href="#">TFPNAPRAAR</a>   |
| 4.3   | 1115.568298 | 0.006930  | <a href="#">ESQELRQAR</a>    |

# MASCOT Search Results

## Peptide View

MS/MS Fragmentation of **VLELEGEKGEWGFK**

Found in **CSN2\_HUMAN**, COP9 signalosome complex subunit 2 OS=Homo sapiens GN=COPS2 PE=1 SV=1

Match to Query 47153: 1619.816592 from(540.946140,3+) rtinseconds(2728) index(36629)

Title: Locus:1.1.1.2527.13

Data file 2011-11-10 - TFD - EP 4-3.mgf

Click mouse within plot area to zoom in by factor of two about that point

Or, Plot from  to  Da

Label all possible matches  Label matches used for scoring

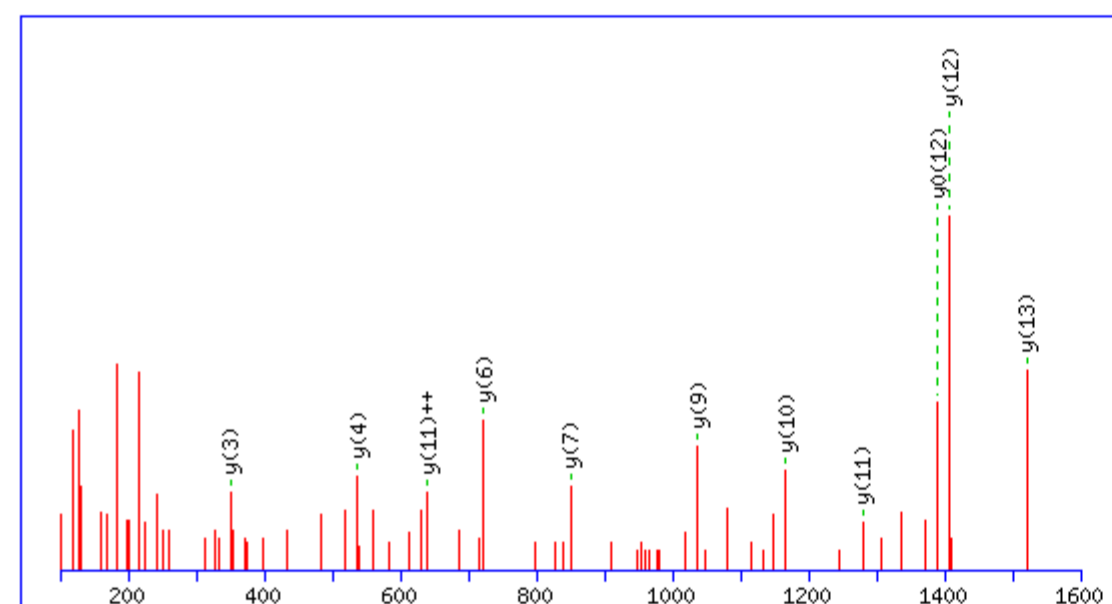

Monoisotopic mass of neutral peptide  $M_r(\text{calc})$ : 1619.819504

Fixed modifications: Propionamide (C) (apply to specified residues or termini only)

Ions Score: 70 Expect:  $9.6e-007$

Matches : 11/130 fragment ions using 15 most intense peaks ([help](#))

| #  | b           | b <sup>++</sup> | b <sup>*</sup> | b <sup>*++</sup> | b <sup>0</sup> | b <sup>0++</sup> | Seq. | y                  | y <sup>++</sup>   | y <sup>*</sup> | y <sup>*++</sup> | y <sup>0</sup>     | y <sup>0++</sup> | #  |
|----|-------------|-----------------|----------------|------------------|----------------|------------------|------|--------------------|-------------------|----------------|------------------|--------------------|------------------|----|
| 1  | 100.075690  | 50.541483       |                |                  |                |                  | V    |                    |                   |                |                  |                    |                  | 14 |
| 2  | 213.159754  | 107.083515      |                |                  |                |                  | L    | <b>1521.758386</b> | 761.382831        | 1504.731837    | 752.869557       | 1503.747821        | 752.377548       | 13 |
| 3  | 342.202347  | 171.604811      |                |                  | 324.191782     | 162.599529       | E    | <b>1408.674322</b> | 704.840799        | 1391.647773    | 696.327525       | <b>1390.663757</b> | 695.835517       | 12 |
| 4  | 455.286411  | 228.146843      |                |                  | 437.275846     | 219.141561       | L    | <b>1279.631729</b> | <b>640.319503</b> | 1262.605180    | 631.806228       | 1261.621164        | 631.314220       | 11 |
| 5  | 584.329004  | 292.668140      |                |                  | 566.318439     | 283.662858       | E    | <b>1166.547665</b> | 583.777471        | 1149.521116    | 575.264196       | 1148.537100        | 574.772188       | 10 |
| 6  | 641.350468  | 321.178872      |                |                  | 623.339903     | 312.173590       | G    | <b>1037.505072</b> | 519.256174        | 1020.478523    | 510.742900       | 1019.494507        | 510.250892       | 9  |
| 7  | 770.393061  | 385.700169      |                |                  | 752.382496     | 376.694886       | E    | 980.483608         | 490.745442        | 963.457059     | 482.232168       | 962.473043         | 481.740160       | 8  |
| 8  | 898.488024  | 449.747650      | 881.461475     | 441.234376       | 880.477459     | 440.742368       | K    | <b>851.441015</b>  | 426.224146        | 834.414466     | 417.710871       | 833.430450         | 417.218863       | 7  |
| 9  | 955.509488  | 478.258382      | 938.482939     | 469.745108       | 937.498923     | 469.253100       | G    | <b>723.346052</b>  | 362.176664        | 706.319503     | 353.663389       | 705.335487         | 353.171382       | 6  |
| 10 | 1084.552081 | 542.779679      | 1067.525532    | 534.266404       | 1066.541516    | 533.774396       | E    | 666.324588         | 333.665932        | 649.298039     | 325.152657       | 648.314023         | 324.660649       | 5  |
| 11 | 1270.631394 | 635.819335      | 1253.604845    | 627.306061       | 1252.620829    | 626.814053       | W    | <b>537.281995</b>  | 269.144636        | 520.255446     | 260.631361       |                    |                  | 4  |
| 12 | 1327.652858 | 664.330067      | 1310.626309    | 655.816793       | 1309.642293    | 655.324784       | G    | <b>351.202682</b>  | 176.104979        | 334.176133     | 167.591704       |                    |                  | 3  |
| 13 | 1474.721272 | 737.864274      | 1457.694723    | 729.351000       | 1456.710707    | 728.858992       | F    | 294.181218         | 147.594247        | 277.154669     | 139.080973       |                    |                  | 2  |
| 14 |             |                 |                |                  |                |                  | K    | 147.112804         | 74.060040         | 130.086255     | 65.546765        |                    |                  | 1  |

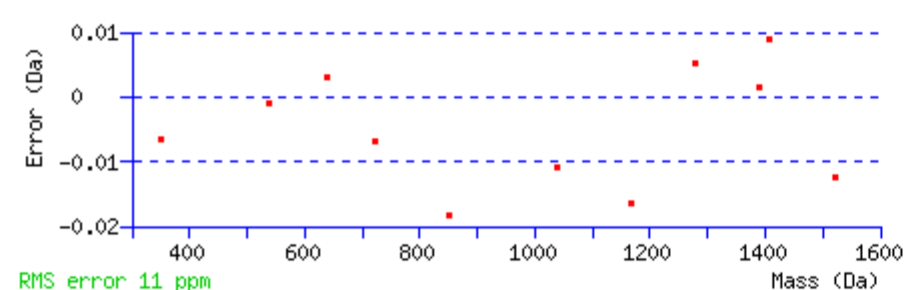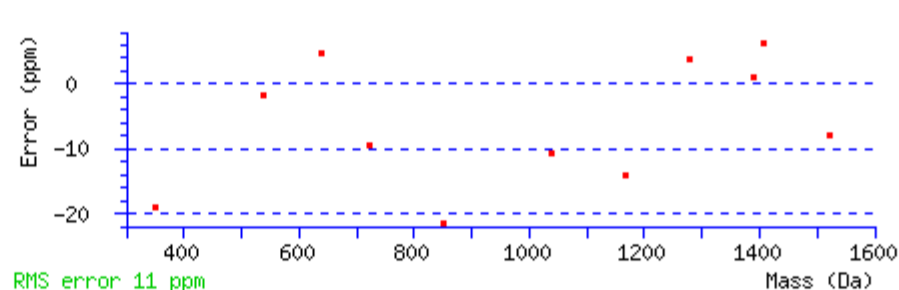

NCBI BLAST search of **VLELEGEKGEWGFK**

(Parameters: blastp, nr protein database, expect=20000, no filter, PAM30)

Other BLAST [web gateways](#)

All matches to this query

| Score | $M_r(\text{calc})$ : | Delta     | Sequence                       |
|-------|----------------------|-----------|--------------------------------|
| 70.4  | 1619.819504          | -0.002912 | <a href="#">VLELEGEKGEWGFK</a> |
| 6.2   | 1619.816345          | 0.000247  | <a href="#">ALINPFAPSRMPMK</a> |
| 5.3   | 1619.816345          | 0.000247  | <a href="#">ALINPFAPSRMPMK</a> |

Mascot: <http://www.matrixscience.com/>

# MASCOT SCIENCE Mascot Search Results

## Peptide View

MS/MS Fragmentation of **SLIIDEGEDDLGR**

Found in **CCS\_HUMAN**, Copper chaperone for superoxide dismutase OS=Homo sapiens GN=CCS PE=1 SV=1

Match to Query 43452: 1430.694988 from(716.354770,2+) rtinseconds(2580) index(33025)

Title: Locus:1.1.1.2398.39

Data file 2011-11-12 - TFD - EP 5-4.mgf

Click mouse within plot area to zoom in by factor of two about that point

Or, Plot from  to  Da

Label all possible matches  Label matches used for scoring

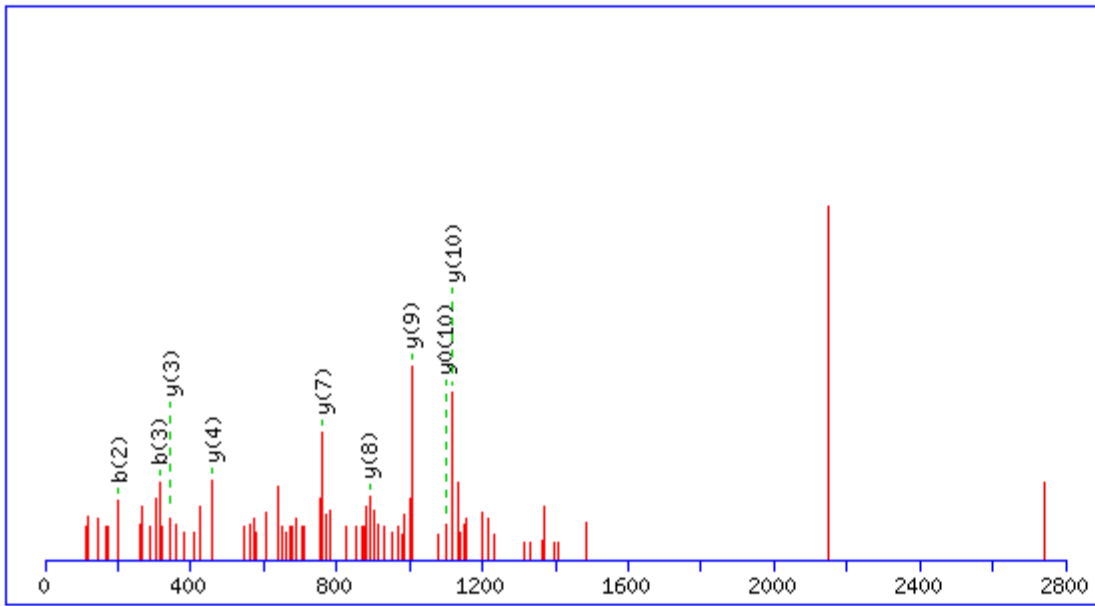

Monoisotopic mass of neutral peptide  $M_r(\text{calc})$ : 1430.688889

Fixed modifications: Propionamide (C) (apply to specified residues or termini only)

Ions Score: 41 Expect: 0.00088

Matches : 9/114 fragment ions using 13 most intense peaks ([help](#))

| #  | b                 | b <sup>++</sup> | b <sup>0</sup> | b <sup>0++</sup> | Seq. | y                  | y <sup>++</sup> | y <sup>*</sup> | y <sup>*++</sup> | y <sup>0</sup>     | y <sup>0++</sup> | #  |
|----|-------------------|-----------------|----------------|------------------|------|--------------------|-----------------|----------------|------------------|--------------------|------------------|----|
| 1  | 88.039304         | 44.523290       | 70.028739      | 35.518008        | S    |                    |                 |                |                  |                    |                  | 13 |
| 2  | <b>201.123368</b> | 101.065322      | 183.112803     | 92.060039        | L    | 1344.664151        | 672.835713      | 1327.637602    | 664.322439       | 1326.653586        | 663.830431       | 12 |
| 3  | <b>314.207432</b> | 157.607354      | 296.196867     | 148.602071       | I    | 1231.580087        | 616.293681      | 1214.553538    | 607.780407       | 1213.569522        | 607.288399       | 11 |
| 4  | 427.291496        | 214.149386      | 409.280931     | 205.144104       | I    | <b>1118.496023</b> | 559.751649      | 1101.469474    | 551.238375       | <b>1100.485458</b> | 550.746367       | 10 |
| 5  | 542.318439        | 271.662858      | 524.307874     | 262.657575       | D    | <b>1005.411959</b> | 503.209617      | 988.385410     | 494.696343       | 987.401394         | 494.204335       | 9  |
| 6  | 671.361032        | 336.184154      | 653.350467     | 327.178872       | E    | <b>890.385016</b>  | 445.696146      | 873.358467     | 437.182871       | 872.374451         | 436.690863       | 8  |
| 7  | 728.382496        | 364.694886      | 710.371931     | 355.689604       | G    | <b>761.342423</b>  | 381.174849      | 744.315874     | 372.661575       | 743.331858         | 372.169567       | 7  |
| 8  | 857.425089        | 429.216183      | 839.414524     | 420.210900       | E    | 704.320959         | 352.664117      | 687.294410     | 344.150843       | 686.310394         | 343.658835       | 6  |
| 9  | 972.452032        | 486.729654      | 954.441467     | 477.724372       | D    | 575.278366         | 288.142821      | 558.251817     | 279.629546       | 557.267801         | 279.137538       | 5  |
| 10 | 1087.478975       | 544.243126      | 1069.468410    | 535.237843       | D    | <b>460.251423</b>  | 230.629349      | 443.224874     | 222.116075       | 442.240858         | 221.624067       | 4  |
| 11 | 1200.563039       | 600.785157      | 1182.552474    | 591.779875       | L    | <b>345.224480</b>  | 173.115878      | 328.197931     | 164.602603       |                    |                  | 3  |
| 12 | 1257.584503       | 629.295889      | 1239.573938    | 620.290607       | G    | 232.140416         | 116.573846      | 215.113867     | 108.060571       |                    |                  | 2  |
| 13 |                   |                 |                |                  | R    | 175.118952         | 88.063114       | 158.092403     | 79.549839        |                    |                  | 1  |

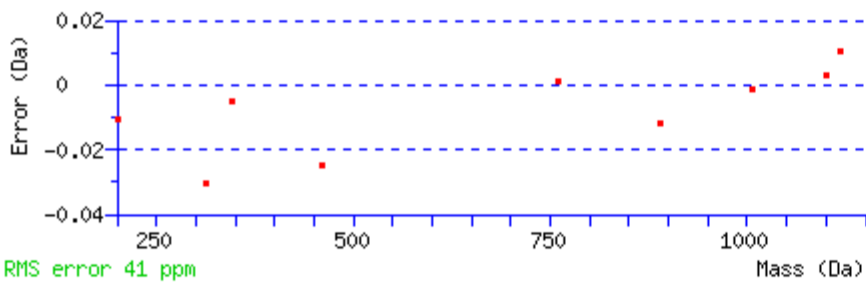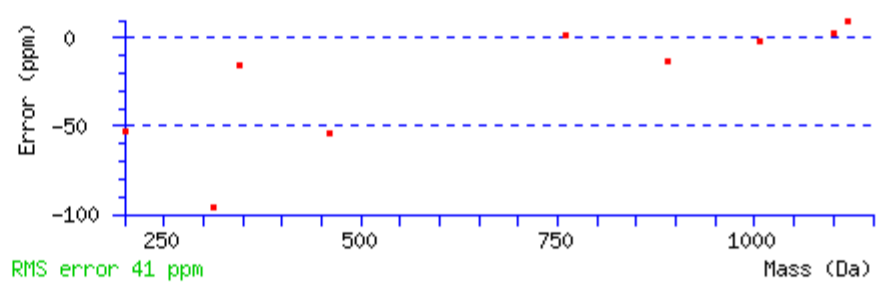

NCBI BLAST search of [SLIIDEGEDDLGR](#)

(Parameters: blastp, nr protein database, expect=20000, no filter, PAM30)

Other BLAST [web gateways](#)

## All matches to this query

| Score | $M_r(\text{calc})$ : | Delta     | Sequence                        |
|-------|----------------------|-----------|---------------------------------|
| 40.7  | 1430.688889          | 0.006099  | <a href="#">SLIIDEGEDDLGR</a>   |
| 4.1   | 1430.700104          | -0.005116 | <a href="#">AEPASVAAESLAGSR</a> |

Mascot: <http://www.matrixscience.com/>

# MASCOT Search Results

## Peptide View

MS/MS Fragmentation of **LMEIIGK**

Found in **CRF\_HUMAN**, Corticotiberin OS=Homo sapiens GN=CRH PE=1 SV=1

Match to Query 1277: 818.463328 from(410.238940,2+) rtinseconds(1924) index(18077)

Title: Locus:1.1.1.2291.4

Data file 2011-11-12 - TFD - EP 5-1.mgf

Click mouse within plot area to zoom in by factor of two about that point

Or,   to  Da

Label all possible matches  Label matches used for scoring

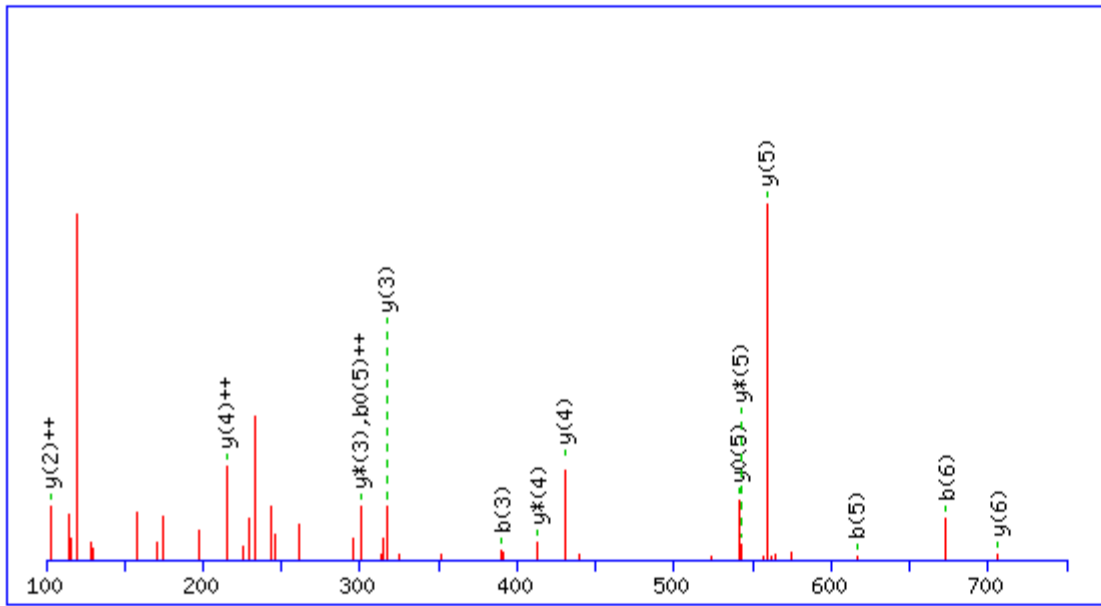

Monoisotopic mass of neutral peptide Mr(calc): 818.457153

Fixed modifications: Propionamide (C) (apply to specified residues or termini only)

Variable modifications:

M2 : Oxidation (M), with neutral losses 0.000000 (shown in table), 63.998285

Ions Score: 31 Expect: 0.0046

Matches : 14/72 fragment ions using 19 most intense peaks [\(help\)](#)

| # | b          | b <sup>++</sup> | b <sup>0</sup> | b <sup>0++</sup> | Seq. | y          | y <sup>++</sup> | y <sup>*</sup> | y <sup>*++</sup> | y <sup>0</sup> | y <sup>0++</sup> | # |
|---|------------|-----------------|----------------|------------------|------|------------|-----------------|----------------|------------------|----------------|------------------|---|
| 1 | 114.091340 | 57.549308       |                |                  | L    |            |                 |                |                  |                |                  | 7 |
| 2 | 261.126740 | 131.067008      |                |                  | M    | 706.380389 | 353.693833      | 689.353840     | 345.180558       | 688.369824     | 344.688550       | 6 |
| 3 | 390.169333 | 195.588304      | 372.158768     | 186.583022       | E    | 559.344989 | 280.176133      | 542.318440     | 271.662858       | 541.334424     | 271.170850       | 5 |
| 4 | 503.253397 | 252.130337      | 485.242832     | 243.125054       | I    | 430.302396 | 215.654836      | 413.275847     | 207.141562       |                |                  | 4 |
| 5 | 616.337461 | 308.672369      | 598.326896     | 299.667086       | I    | 317.218332 | 159.112804      | 300.191783     | 150.599530       |                |                  | 3 |
| 6 | 673.358925 | 337.183101      | 655.348360     | 328.177818       | G    | 204.134268 | 102.570772      | 187.107719     | 94.057498        |                |                  | 2 |
| 7 |            |                 |                |                  | K    | 147.112804 | 74.060040       | 130.086255     | 65.546765        |                |                  | 1 |

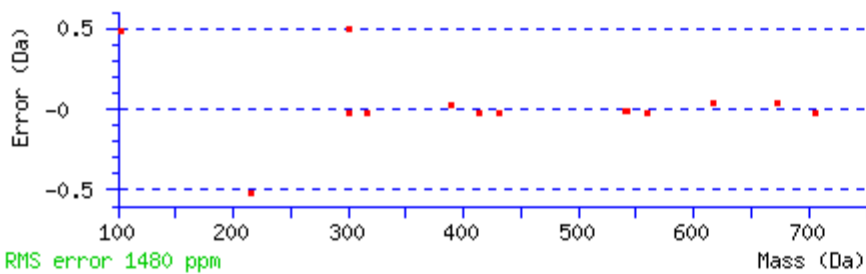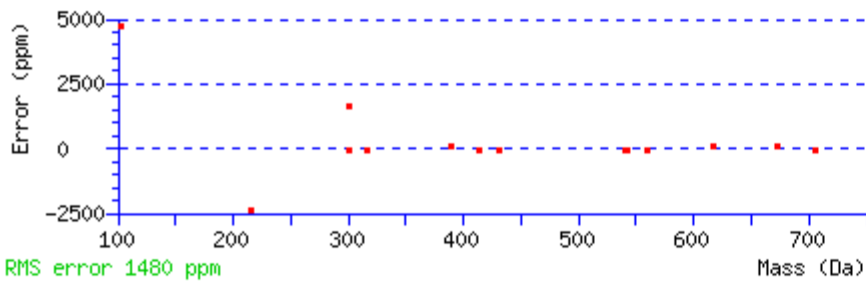

NCBI BLAST search of [LMEIIGK](#)

(Parameters: blastp, nr protein database, expect=20000, no filter, PAM30)

Other BLAST [web gateways](#)

## All matches to this query

| Score | Mr(calc):  | Delta     | Sequence                 |
|-------|------------|-----------|--------------------------|
| 31.2  | 818.457153 | 0.006175  | <a href="#">LMEIIGK</a>  |
| 30.9  | 818.465012 | -0.001684 | <a href="#">FIEIAAR</a>  |
| 11.1  | 818.465027 | -0.001699 | <a href="#">FLPSLAR</a>  |
| 9.0   | 818.457153 | 0.006175  | <a href="#">EIMLGLK</a>  |
| 4.9   | 818.457153 | 0.006175  | <a href="#">IEAMVLK</a>  |
| 4.8   | 818.465042 | -0.001714 | <a href="#">FLLVGDR</a>  |
| 4.6   | 818.457169 | 0.006159  | <a href="#">LMSPVLK</a>  |
| 4.1   | 818.465027 | -0.001699 | <a href="#">YPVLTAR</a>  |
| 3.8   | 818.465027 | -0.001699 | <a href="#">NGFAGLIK</a> |
| 3.5   | 818.468384 | -0.005056 | <a href="#">MLALISR</a>  |

# **MASCOT** Mascot Search Results

## Peptide View

MS/MS Fragmentation of **VGSDQCLLR**

Found in **CXAR\_HUMAN**, Cocksackievirus and adenovirus receptor OS=Homo sapiens GN=CXADR PE=1 SV=1

Match to Query 324606: 1046.522068 from(524.268310,2+) rtinseconds(1596) index(504186)

Title: Locus:1.1.1.937.24

Data file C:\Program Files (x86)\Matrix Science\Mascot Daemon\mgf3 TFD - Epitel - R2\mascot\_daemon\_merge.mgf

Click mouse within plot area to zoom in by factor of two about that point

Or, Plot from  to  Da

Label all possible matches  Label matches used for scoring

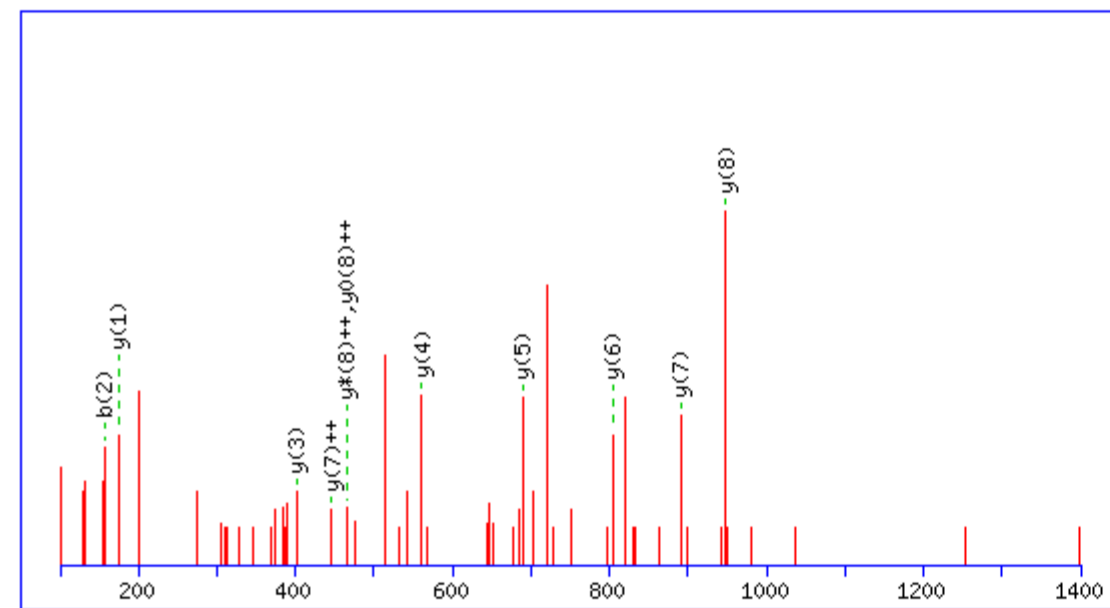

Monoisotopic mass of neutral peptide Mr(calc): 1046.517883

Fixed modifications: Carbamidomethyl (C) (apply to specified residues or termini only)

Ions Score: 35 Expect: 0.0053

Matches : 11/74 fragment ions using 26 most intense peaks [\(help\)](#)

| # | b          | b <sup>++</sup> | b <sup>*</sup> | b <sup>*++</sup> | b <sup>0</sup> | b <sup>0++</sup> | Seq. | y          | y <sup>++</sup> | y <sup>*</sup> | y <sup>*++</sup> | y <sup>0</sup> | y <sup>0++</sup> | # |
|---|------------|-----------------|----------------|------------------|----------------|------------------|------|------------|-----------------|----------------|------------------|----------------|------------------|---|
| 1 | 100.075690 | 50.541483       |                |                  |                |                  | V    |            |                 |                |                  |                |                  | 9 |
| 2 | 157.097154 | 79.052215       |                |                  |                |                  | G    | 948.456742 | 474.732009      | 931.430193     | 466.218735       | 930.446177     | 465.726727       | 8 |
| 3 | 244.129182 | 122.568229      |                |                  | 226.118617     | 113.562946       | S    | 891.435278 | 446.221277      | 874.408729     | 437.708003       | 873.424713     | 437.215995       | 7 |
| 4 | 359.156125 | 180.081700      |                |                  | 341.145560     | 171.076418       | D    | 804.403250 | 402.705263      | 787.376701     | 394.191989       | 786.392685     | 393.699981       | 6 |
| 5 | 487.214703 | 244.110989      | 470.188154     | 235.597715       | 469.204138     | 235.105707       | Q    | 689.376307 | 345.191792      | 672.349758     | 336.678517       |                |                  | 5 |
| 6 | 647.245352 | 324.126314      | 630.218803     | 315.613040       | 629.234787     | 315.121032       | C    | 561.317729 | 281.162503      | 544.291180     | 272.649228       |                |                  | 4 |
| 7 | 760.329416 | 380.668346      | 743.302867     | 372.155072       | 742.318851     | 371.663064       | L    | 401.287080 | 201.147178      | 384.260531     | 192.633904       |                |                  | 3 |
| 8 | 873.413480 | 437.210378      | 856.386931     | 428.697104       | 855.402915     | 428.205096       | L    | 288.203016 | 144.605146      | 271.176467     | 136.091872       |                |                  | 2 |
| 9 |            |                 |                |                  |                |                  | R    | 175.118952 | 88.063114       | 158.092403     | 79.549840        |                |                  | 1 |

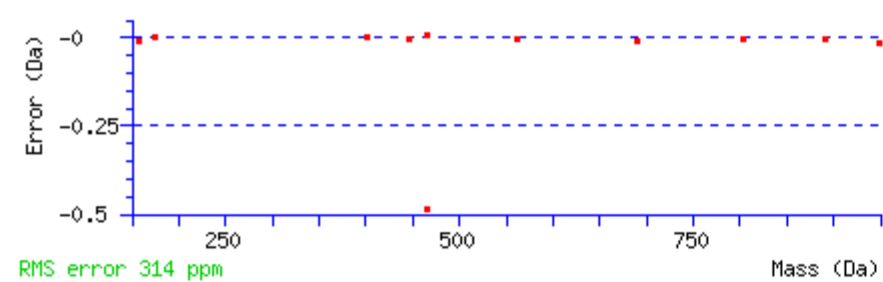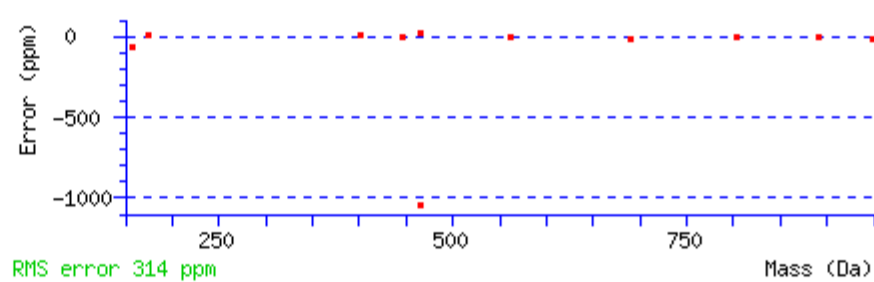

NCBI BLAST search of [VGSDQCLLR](#)

(Parameters: blastp, nr protein database, expect=20000, no filter, PAM30)

Other BLAST [web gateways](#)

## All matches to this query

| Score | Mr(calc):   | Delta     | Sequence                    |
|-------|-------------|-----------|-----------------------------|
| 35.0  | 1046.517883 | 0.004185  | <a href="#">VGSDQCLLR</a>   |
| 11.7  | 1046.517883 | 0.004185  | <a href="#">VNGDTCIIR</a>   |
| 9.8   | 1046.531784 | -0.009716 | <a href="#">VGS DIAELLM</a> |
| 4.5   | 1046.529114 | -0.007046 | <a href="#">VATSPTCRR</a>   |
| 4.1   | 1046.529083 | -0.007015 | <a href="#">RATAAECLR</a>   |
| 3.7   | 1046.521912 | 0.000156  | <a href="#">VMWTPPLR</a>    |
| 3.1   | 1046.529755 | -0.007687 | <a href="#">YFSQHLPR</a>    |

Mascot: <http://www.matrixscience.com/>

# **MATRIX** SCIENCE Mascot Search Results

## Peptide View

### MS/MS Fragmentation of **TDLTISR**

Found in **CRTC3\_HUMAN**, CREB-regulated transcription coactivator 3 OS=Homo sapiens GN=CRTC3 PE=1 SV=2

Match to Query 9228: 804.439928 from(403.227240,2+) rtinseconds(1370) index(335482)

Title: Locus:1.1.1.858.2

Data file C:\Program Files (x86)\Matrix Science\Mascot Daemon\mgf3 TFD - Epitel - R2\mascot\_daemon\_merge.mgf

Click mouse within plot area to zoom in by factor of two about that point

Or, Plot from  to  Da

Label all possible matches  Label matches used for scoring

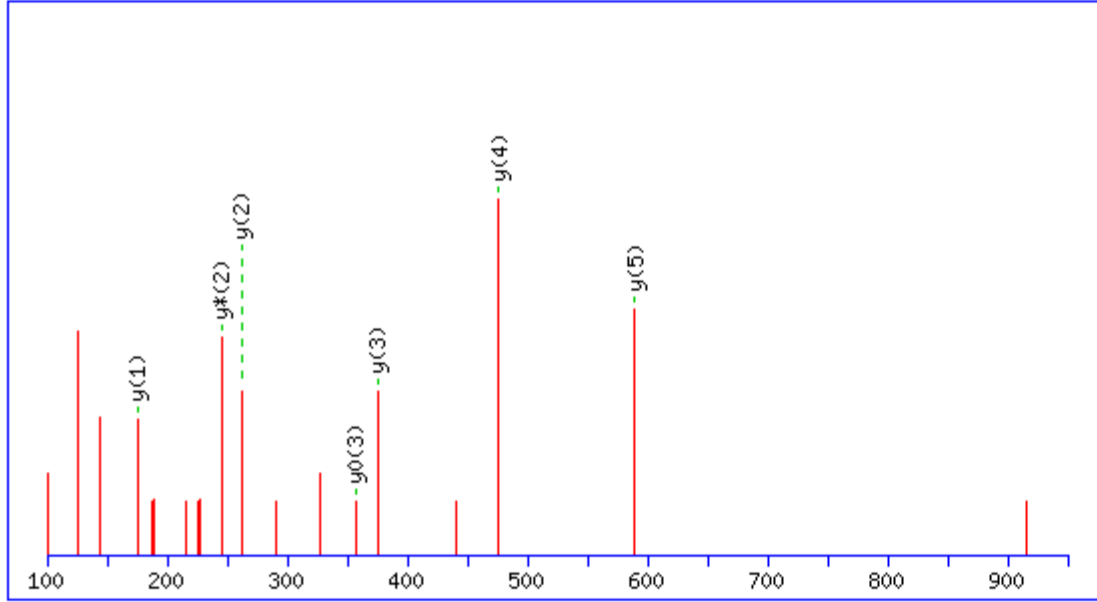

Monoisotopic mass of neutral peptide  $M_r(\text{calc})$ : 804.434128

Fixed modifications: Carbamidomethyl (C) (apply to specified residues or termini only)

Ions Score: 37 Expect: 0.0021

Matches : 7/58 fragment ions using 12 most intense peaks [\(help\)](#)

| # | b          | b <sup>++</sup> | b <sup>0</sup> | b <sup>0++</sup> | Seq. | y                 | y <sup>++</sup> | y <sup>*</sup>    | y <sup>*++</sup> | y <sup>0</sup>    | y <sup>0++</sup> | # |
|---|------------|-----------------|----------------|------------------|------|-------------------|-----------------|-------------------|------------------|-------------------|------------------|---|
| 1 | 102.054955 | 51.531116       | 84.044390      | 42.525833        | T    |                   |                 |                   |                  |                   |                  | 7 |
| 2 | 217.081898 | 109.044587      | 199.071333     | 100.039304       | D    | 704.393730        | 352.700503      | 687.367181        | 344.187229       | 686.383165        | 343.695221       | 6 |
| 3 | 330.165962 | 165.586619      | 312.155397     | 156.581336       | L    | <b>589.366787</b> | 295.187032      | 572.340238        | 286.673757       | 571.356222        | 286.181749       | 5 |
| 4 | 431.213641 | 216.110458      | 413.203076     | 207.105176       | T    | <b>476.282723</b> | 238.644999      | 459.256174        | 230.131725       | 458.272158        | 229.639717       | 4 |
| 5 | 544.297705 | 272.652491      | 526.287140     | 263.647208       | L    | <b>375.235044</b> | 188.121160      | 358.208495        | 179.607885       | <b>357.224479</b> | 179.115877       | 3 |
| 6 | 631.329733 | 316.168505      | 613.319168     | 307.163222       | S    | <b>262.150980</b> | 131.579128      | <b>245.124431</b> | 123.065853       | 244.140415        | 122.573845       | 2 |
| 7 |            |                 |                |                  | R    | <b>175.118952</b> | 88.063114       | 158.092403        | 79.549839        |                   |                  | 1 |

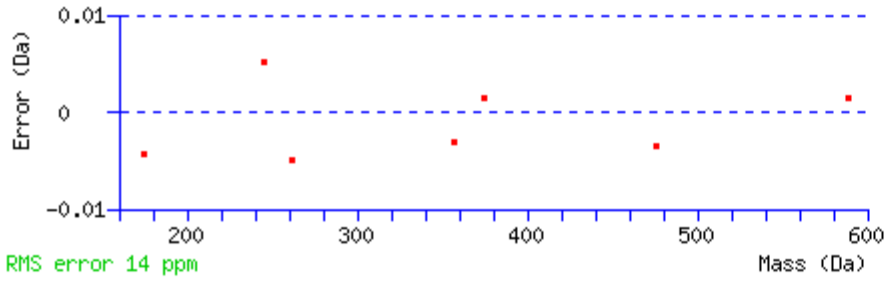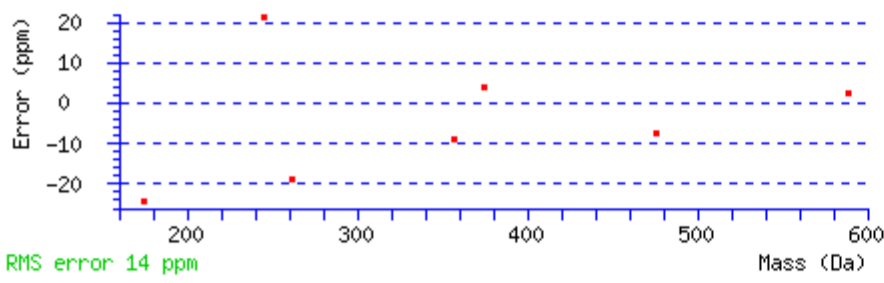

### NCBI BLAST search of **TDLTISR**

(Parameters: blastp, nr protein database, expect=20000, no filter, PAM30)

Other BLAST [web gateways](#)

### All matches to this query

| Score | $M_r(\text{calc})$ : | Delta     | Sequence                 |
|-------|----------------------|-----------|--------------------------|
| 36.8  | 804.434128           | 0.005800  | <a href="#">TDLTISR</a>  |
| 11.2  | 804.434113           | 0.005815  | <a href="#">TESLISR</a>  |
| 10.3  | 804.434113           | 0.005815  | <a href="#">LSELTSR</a>  |
| 8.0   | 804.434113           | 0.005815  | <a href="#">SSSLGNLK</a> |
| 7.8   | 804.434113           | 0.005815  | <a href="#">SELISTR</a>  |
| 6.7   | 804.441528           | -0.001600 | <a href="#">GLGILTM</a>  |
| 5.8   | 804.434113           | 0.005815  | <a href="#">SSSNILGK</a> |
| 2.4   | 804.434113           | 0.005815  | <a href="#">DTISNKK</a>  |
| 2.0   | 804.434128           | 0.005800  | <a href="#">SLDLTTR</a>  |
| 0.5   | 804.441513           | -0.001585 | <a href="#">GMLDLLK</a>  |



# MASCOT SCIENCE Mascot Search Results

## Peptide View

MS/MS Fragmentation of **FAELETILGDIDR**

Found in **CRNLI\_HUMAN**, Crooked neck-like protein 1 OS=Homo sapiens GN=CRNKL1 PE=1 SV=4

Match to Query 47278: 1490.754368 from(746.384460,2+) rtinseconds(4059) index(60765)

Title: Locus:1.1.1.2971.32

Data file 2011-11-10 - TFD - EP 3-2.mgf

Click mouse within plot area to zoom in by factor of two about that point

Or, Plot from  to  Da

Label all possible matches  Label matches used for scoring

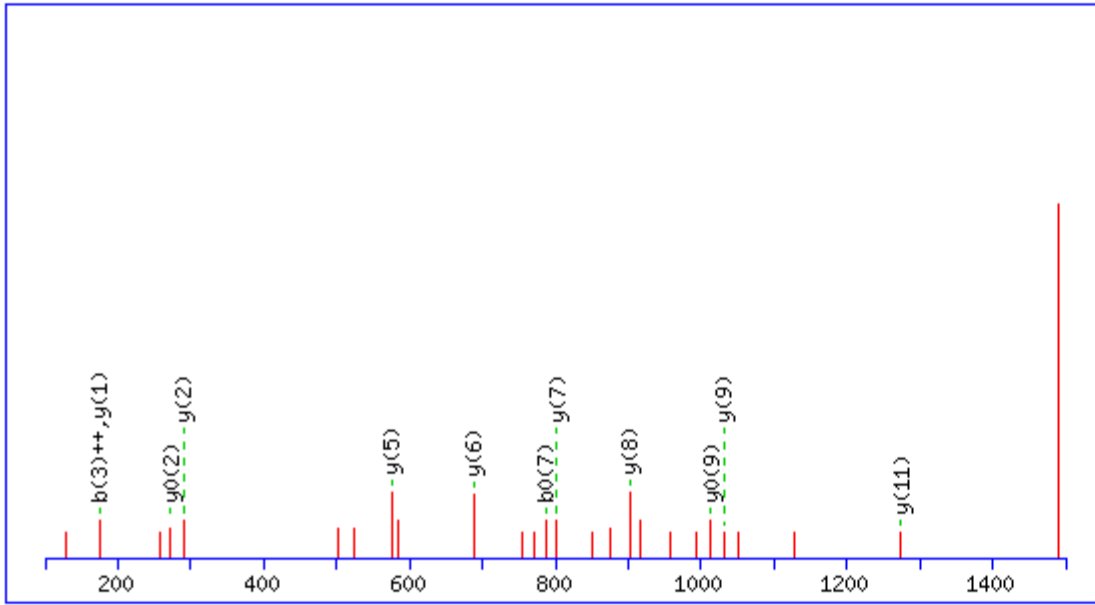

Monoisotopic mass of neutral peptide Mr(calc): 1490.761658

Fixed modifications: Propionamide (C) (apply to specified residues or termini only)

Ions Score: 54 Expect: 4.9e-005

Matches : 12/114 fragment ions using 18 most intense peaks [\(help\)](#)

| #  | b           | b <sup>++</sup> | b <sup>0</sup> | b <sup>0++</sup> | Seq. | y           | y <sup>++</sup> | y <sup>*</sup> | y <sup>*++</sup> | y <sup>0</sup> | y <sup>0++</sup> | #  |
|----|-------------|-----------------|----------------|------------------|------|-------------|-----------------|----------------|------------------|----------------|------------------|----|
| 1  | 148.075690  | 74.541483       |                |                  | F    |             |                 |                |                  |                |                  | 13 |
| 2  | 219.112804  | 110.060040      |                |                  | A    | 1344.700537 | 672.853906      | 1327.673988    | 664.340632       | 1326.689972    | 663.848624       | 12 |
| 3  | 348.155397  | 174.581336      | 330.144832     | 165.576054       | E    | 1273.663423 | 637.335350      | 1256.636874    | 628.822075       | 1255.652858    | 628.330067       | 11 |
| 4  | 461.239461  | 231.123369      | 443.228896     | 222.118086       | L    | 1144.620830 | 572.814053      | 1127.594281    | 564.300779       | 1126.610265    | 563.808771       | 10 |
| 5  | 590.282054  | 295.644665      | 572.271489     | 286.639383       | E    | 1031.536766 | 516.272021      | 1014.510217    | 507.758746       | 1013.526201    | 507.266738       | 9  |
| 6  | 691.329733  | 346.168505      | 673.319168     | 337.163222       | T    | 902.494173  | 451.750725      | 885.467624     | 443.237450       | 884.483608     | 442.745442       | 8  |
| 7  | 804.413797  | 402.710537      | 786.403232     | 393.705254       | I    | 801.446494  | 401.226885      | 784.419945     | 392.713611       | 783.435929     | 392.221603       | 7  |
| 8  | 917.497861  | 459.252569      | 899.487296     | 450.247286       | L    | 688.362430  | 344.684853      | 671.335881     | 336.171579       | 670.351865     | 335.679571       | 6  |
| 9  | 974.519325  | 487.763301      | 956.508760     | 478.758018       | G    | 575.278366  | 288.142821      | 558.251817     | 279.629547       | 557.267801     | 279.137539       | 5  |
| 10 | 1089.546268 | 545.276772      | 1071.535703    | 536.271490       | D    | 518.256902  | 259.632089      | 501.230353     | 251.118814       | 500.246337     | 250.626806       | 4  |
| 11 | 1202.630332 | 601.818804      | 1184.619767    | 592.813521       | I    | 403.229959  | 202.118617      | 386.203410     | 193.605343       | 385.219394     | 193.113335       | 3  |
| 12 | 1317.657275 | 659.332276      | 1299.646710    | 650.326993       | D    | 290.145895  | 145.576585      | 273.119346     | 137.063311       | 272.135330     | 136.571303       | 2  |
| 13 |             |                 |                |                  | R    | 175.118952  | 88.063114       | 158.092403     | 79.549839        |                |                  | 1  |

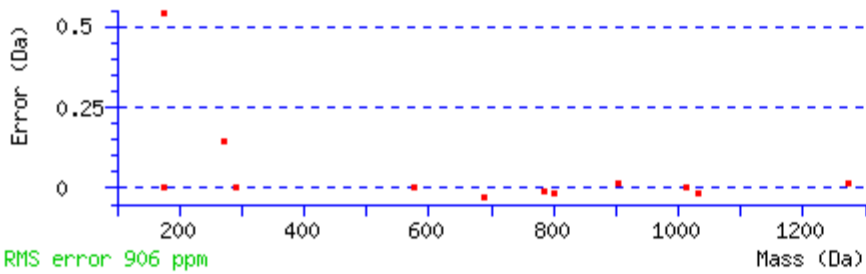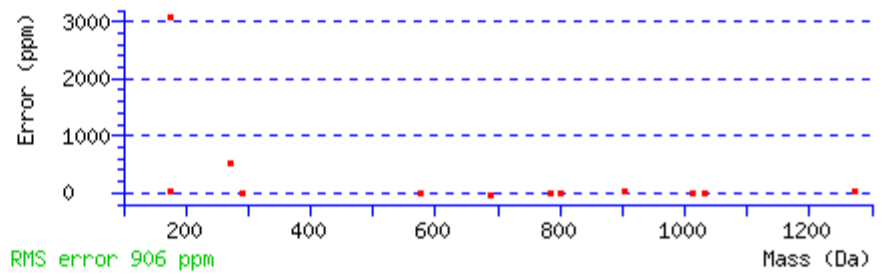

NCBI BLAST search of [FAELETILGDIDR](#)

(Parameters: blastp, nr protein database, expect=20000, no filter, PAM30)

Other BLAST [web gateways](#)

## All matches to this query

| Score | Mr(calc):   | Delta     | Sequence                      |
|-------|-------------|-----------|-------------------------------|
| 54.1  | 1490.761658 | -0.007290 | <a href="#">FAELETILGDIDR</a> |
| 2.5   | 1490.767700 | -0.013332 | <a href="#">HCNIHAGLRPFR</a>  |
| 0.4   | 1490.761673 | -0.007305 | <a href="#">SSDVNIDIKFPPK</a> |

Mascot: <http://www.matrixscience.com/>

# MASCOT SEARCH RESULTS

## Peptide View

MS/MS Fragmentation of **AGQLSQGAAEEDHGCR**

Found in **MRC2\_HUMAN**, C-type mannose receptor 2 OS=Homo sapiens GN=MRC2 PE=1 SV=2

Match to Query 953211: 1684.726602 from(562.582810,3+) rtinseconds(999) index(411919)

Title: Locus:1.1.1.715.25

Data file C:\Program Files (x86)\Matrix Science\Mascot Daemon\mgf3 TFD - Epitel - R2\mascot\_daemon\_merge.mgf

Click mouse within plot area to zoom in by factor of two about that point

Or, Plot from  to  Da

Label all possible matches  Label matches used for scoring

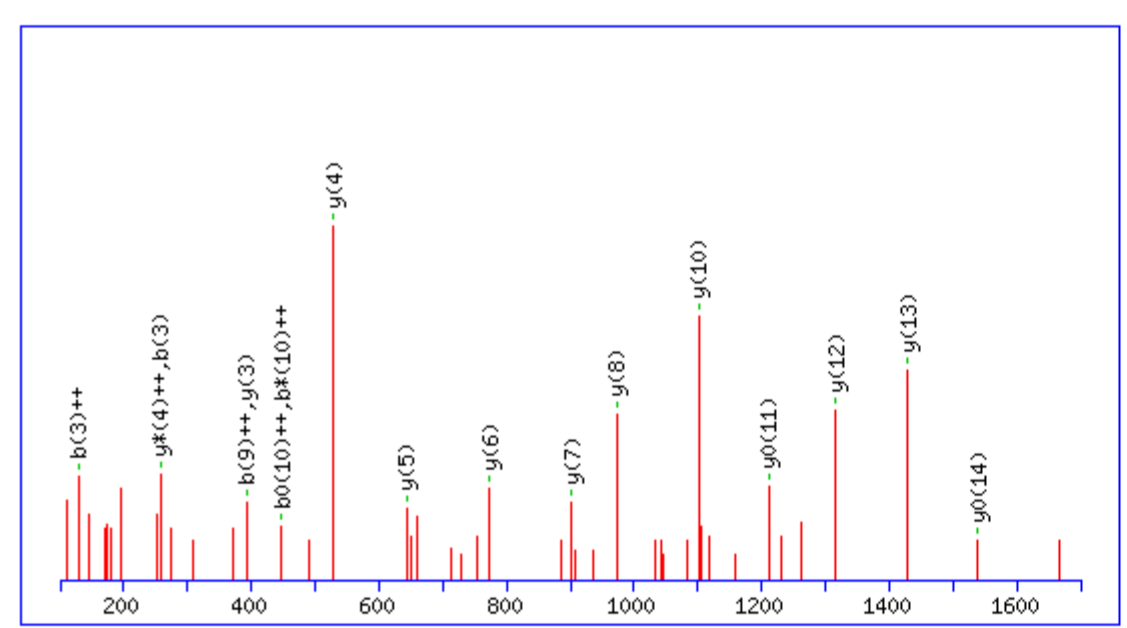

Monoisotopic mass of neutral peptide Mr(calc): 1684.722336

Fixed modifications: Carbamidomethyl (C) (apply to specified residues or termini only)

Ions Score: 88 Expect: 6.2e-009

Matches : 18/160 fragment ions using 16 most intense peaks [\(help\)](#)

| #  | b                 | b <sup>++</sup>   | b <sup>*</sup> | b <sup>*++</sup>  | b <sup>0</sup> | b <sup>0++</sup>  | Seq. | y                  | y <sup>++</sup> | y <sup>*</sup> | y <sup>*++</sup>  | y <sup>0</sup>     | y <sup>0++</sup> | #  |
|----|-------------------|-------------------|----------------|-------------------|----------------|-------------------|------|--------------------|-----------------|----------------|-------------------|--------------------|------------------|----|
| 1  | 72.044390         | 36.525833         |                |                   |                |                   | A    |                    |                 |                |                   |                    |                  | 16 |
| 2  | <b>129.065854</b> | 65.036565         |                |                   |                |                   | G    | 1614.692510        | 807.849893      | 1597.665961    | 799.336619        | 1596.681945        | 798.844611       | 15 |
| 3  | <b>257.124432</b> | <b>129.065854</b> | 240.097883     | 120.552580        |                |                   | Q    | 1557.671046        | 779.339161      | 1540.644497    | 770.825887        | <b>1539.660481</b> | 770.333879       | 14 |
| 4  | 370.208496        | 185.607886        | 353.181947     | 177.094612        |                |                   | L    | <b>1429.612468</b> | 715.309872      | 1412.585919    | 706.796598        | 1411.601903        | 706.304590       | 13 |
| 5  | 457.240524        | 229.123900        | 440.213975     | 220.610626        | 439.229959     | 220.118618        | S    | <b>1316.528404</b> | 658.767840      | 1299.501855    | 650.254566        | 1298.517839        | 649.762557       | 12 |
| 6  | 585.299102        | 293.153189        | 568.272553     | 284.639915        | 567.288537     | 284.147907        | Q    | 1229.496376        | 615.251826      | 1212.469827    | 606.738552        | <b>1211.485811</b> | 606.246544       | 11 |
| 7  | 642.320566        | 321.663921        | 625.294017     | 313.150647        | 624.310001     | 312.658639        | G    | <b>1101.437798</b> | 551.222537      | 1084.411249    | 542.709263        | 1083.427233        | 542.217255       | 10 |
| 8  | 713.357680        | 357.182478        | 696.331131     | 348.669204        | 695.347115     | 348.177196        | A    | 1044.416334        | 522.711805      | 1027.389785    | 514.198531        | 1026.405769        | 513.706523       | 9  |
| 9  | 784.394794        | <b>392.701035</b> | 767.368245     | 384.187761        | 766.384229     | 383.695753        | A    | <b>973.379220</b>  | 487.193248      | 956.352671     | 478.679974        | 955.368655         | 478.187966       | 8  |
| 10 | 913.437387        | 457.222332        | 896.410838     | <b>448.709057</b> | 895.426822     | <b>448.217049</b> | E    | <b>902.342106</b>  | 451.674691      | 885.315557     | 443.161417        | 884.331541         | 442.669409       | 7  |
| 11 | 1042.479980       | 521.743628        | 1025.453431    | 513.230354        | 1024.469415    | 512.738346        | E    | <b>773.299513</b>  | 387.153395      | 756.272964     | 378.640120        | 755.288948         | 378.148112       | 6  |
| 12 | 1157.506923       | 579.257100        | 1140.480374    | 570.743825        | 1139.496358    | 570.251817        | D    | <b>644.256920</b>  | 322.632098      | 627.230371     | 314.118824        | 626.246355         | 313.626816       | 5  |
| 13 | 1294.565835       | 647.786556        | 1277.539286    | 639.273281        | 1276.555270    | 638.781273        | H    | <b>529.229977</b>  | 265.118627      | 512.203428     | <b>256.605352</b> |                    |                  | 4  |
| 14 | 1351.587299       | 676.297288        | 1334.560750    | 667.784013        | 1333.576734    | 667.292005        | G    | <b>392.171065</b>  | 196.589170      | 375.144516     | 188.075896        |                    |                  | 3  |
| 15 | 1511.617948       | 756.312612        | 1494.591399    | 747.799338        | 1493.607383    | 747.307330        | C    | 335.149601         | 168.078438      | 318.123052     | 159.565164        |                    |                  | 2  |
| 16 |                   |                   |                |                   |                |                   | R    | 175.118952         | 88.063114       | 158.092403     | 79.549839         |                    |                  | 1  |

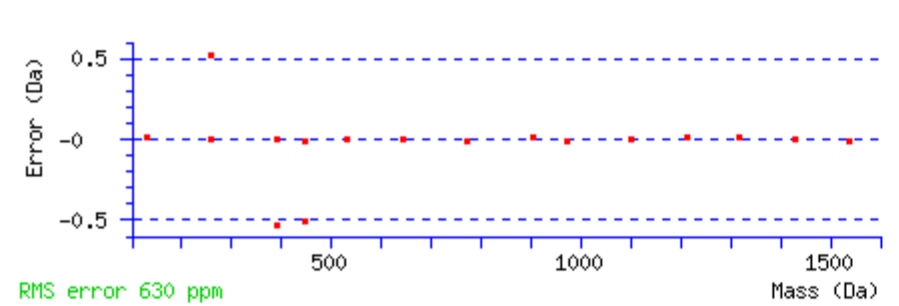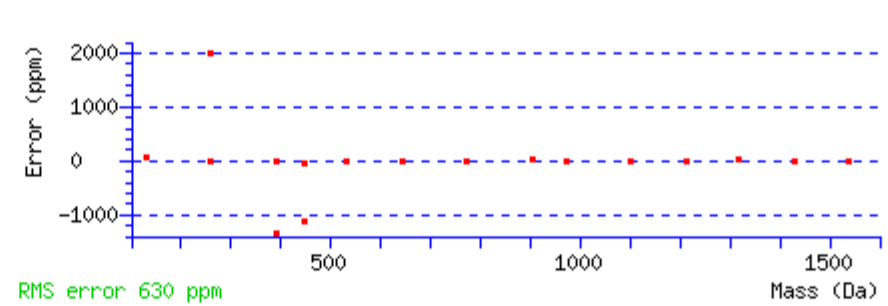

NCBI BLAST search of [AGQLSQGAAEEDHGCR](#)

(Parameters: blastp, nr protein database, expect=20000, no filter, PAM30)

Other BLAST [web gateways](#)

### All matches to this query

| Score | Mr(calc):   | Delta     | Sequence                         |
|-------|-------------|-----------|----------------------------------|
| 88.2  | 1684.722336 | 0.004266  | <a href="#">AGQLSQGAAEEDHGCR</a> |
| 0.7   | 1684.732407 | -0.005805 | <a href="#">MLYCEAESPTVEK</a>    |
| 0.7   | 1684.732407 | -0.005805 | <a href="#">MLYCEAESPTVEK</a>    |

# **MATRIX** SCIENCE Mascot Search Results

## Peptide View

MS/MS Fragmentation of **RAPPVSMR**

Found in **CXCL14\_HUMAN**, C-X-C motif chemokine 14 OS=Homo sapiens GN=CXCL14 PE=1 SV=2

Match to Query 10554: 928.492848 from(465.253700,2+) rtinseconds(2700) index(34289)

Title: Locus:1.1.1.2343.8

Data file 2011-11-10 - TFD - EP 4-5.mgf

Click mouse within plot area to zoom in by factor of two about that point

Or, Plot from  to  Da

Label all possible matches  Label matches used for scoring

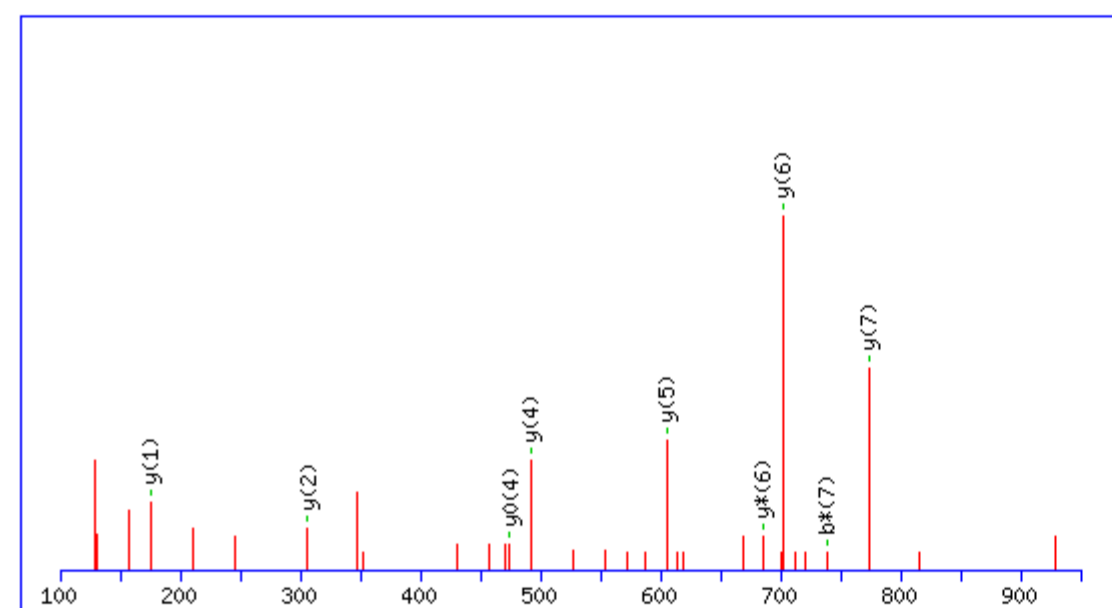

Monoisotopic mass of neutral peptide Mr(calc): 928.491257

Fixed modifications: Propionamide (C) (apply to specified residues or termini only)

Variable modifications:

P4 : Oxidation (P)

Ions Score: 45 Expect: 0.00058

Matches : 9/70 fragment ions using 14 most intense peaks ([help](#))

| # | b          | b <sup>++</sup> | b <sup>*</sup>    | b <sup>*++</sup> | b <sup>0</sup> | b <sup>0++</sup> | Seq. | y                 | y <sup>++</sup> | y <sup>*</sup>    | y <sup>*++</sup> | y <sup>0</sup>    | y <sup>0++</sup> | # |
|---|------------|-----------------|-------------------|------------------|----------------|------------------|------|-------------------|-----------------|-------------------|------------------|-------------------|------------------|---|
| 1 | 157.108387 | 79.057831       | 140.081838        | 70.544557        |                |                  | R    |                   |                 |                   |                  |                   |                  | 8 |
| 2 | 228.145501 | 114.576388      | 211.118952        | 106.063114       |                |                  | A    | <b>773.397436</b> | 387.202356      | 756.370887        | 378.689081       | 755.386871        | 378.197073       | 7 |
| 3 | 325.198265 | 163.102770      | 308.171716        | 154.589496       |                |                  | P    | <b>702.360322</b> | 351.683799      | <b>685.333773</b> | 343.170524       | 684.349757        | 342.678516       | 6 |
| 4 | 438.245944 | 219.626610      | 421.219395        | 211.113335       |                |                  | P    | <b>605.307558</b> | 303.157417      | 588.281009        | 294.644142       | 587.296993        | 294.152134       | 5 |
| 5 | 537.314358 | 269.160817      | 520.287809        | 260.647542       |                |                  | V    | <b>492.259879</b> | 246.633577      | 475.233330        | 238.120303       | <b>474.249314</b> | 237.628295       | 4 |
| 6 | 624.346386 | 312.676831      | 607.319837        | 304.163556       | 606.335821     | 303.671548       | S    | 393.191465        | 197.099370      | 376.164916        | 188.586096       | 375.180900        | 188.094088       | 3 |
| 7 | 755.386871 | 378.197073      | <b>738.360322</b> | 369.683799       | 737.376306     | 369.191791       | M    | <b>306.159437</b> | 153.583356      | 289.132888        | 145.070082       |                   |                  | 2 |
| 8 |            |                 |                   |                  |                |                  | R    | <b>175.118952</b> | 88.063114       | 158.092403        | 79.549839        |                   |                  | 1 |

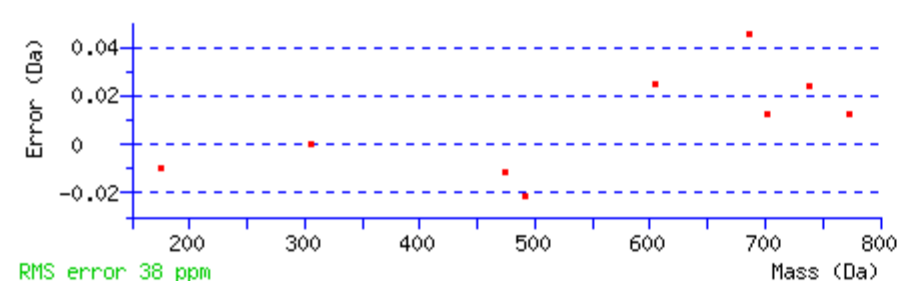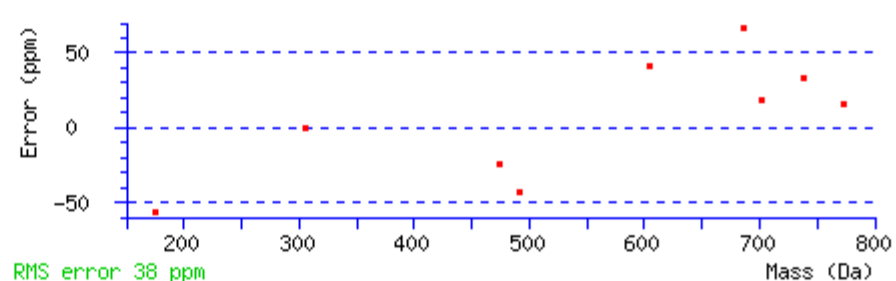

NCBI BLAST search of [RAPPVSMR](#)

(Parameters: blastp, nr protein database, expect=20000, no filter, PAM30)

Other BLAST [web gateways](#)

## All matches to this query

| Score | Mr(calc):  | Delta     | Sequence                   |
|-------|------------|-----------|----------------------------|
| 44.5  | 928.491257 | 0.001591  | <a href="#">RAPPVSMR</a>   |
| 41.6  | 928.495285 | -0.002437 | <a href="#">GVAPLWMR</a>   |
| 30.7  | 928.491257 | 0.001591  | <a href="#">RAPPVSMR</a>   |
| 21.9  | 928.491257 | 0.001591  | <a href="#">RAPPVSMR</a>   |
| 11.9  | 928.483856 | 0.008992  | <a href="#">RAGSQSPAR</a>  |
| 10.3  | 928.497787 | -0.004939 | <a href="#">EVIQGEVR</a>   |
| 10.2  | 928.497787 | -0.004939 | <a href="#">KVEDVPSR</a>   |
| 9.7   | 928.497772 | -0.004924 | <a href="#">INEVQQAK</a>   |
| 6.3   | 928.483887 | 0.008961  | <a href="#">LGGGRGGPSR</a> |
| 5.7   | 928.497787 | -0.004939 | <a href="#">LNSVEPVR</a>   |

# MASCOT Search Results

## Peptide View

MS/MS Fragmentation of **VETLENANR**

Found in **CR3L1\_HUMAN**, Cyclic AMP-responsive element-binding protein 3-like protein 1 OS=Homo sapiens GN=CREB3L1 PE=1 SV=1

Match to Query 19509: 1044.513748 from(523.264150,2+) rtinseconds(1714) index(15746)

Title: Locus:1.1.1.2112.28

Data file 2011-11-14 - TFD - EP 7-2.mgf

Click mouse within plot area to zoom in by factor of two about that point

Or, Plot from  to  Da

Label all possible matches  Label matches used for scoring

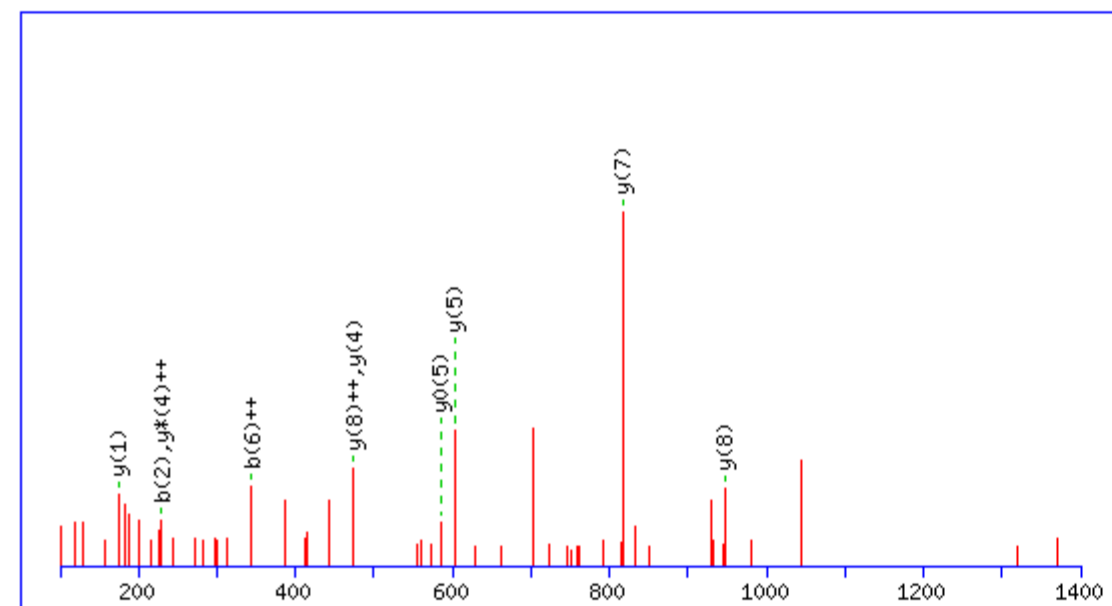

Monoisotopic mass of neutral peptide Mr(calc): 1044.519958

Fixed modifications: Propionamide (C) (apply to specified residues or termini only)

Ions Score: 40 Expect: 0.0013

Matches : 10/76 fragment ions using 9 most intense peaks ([help](#))

| # | b          | b <sup>++</sup> | b <sup>*</sup> | b <sup>*++</sup> | b <sup>0</sup> | b <sup>0++</sup> | Seq. | y          | y <sup>++</sup> | y <sup>*</sup> | y <sup>*++</sup> | y <sup>0</sup> | y <sup>0++</sup> | # |
|---|------------|-----------------|----------------|------------------|----------------|------------------|------|------------|-----------------|----------------|------------------|----------------|------------------|---|
| 1 | 100.075690 | 50.541483       |                |                  |                |                  | V    |            |                 |                |                  |                |                  | 9 |
| 2 | 229.118283 | 115.062780      |                |                  | 211.107718     | 106.057497       | E    | 946.458849 | 473.733063      | 929.432300     | 465.219788       | 928.448284     | 464.727780       | 8 |
| 3 | 330.165962 | 165.586619      |                |                  | 312.155397     | 156.581337       | T    | 817.416256 | 409.211766      | 800.389707     | 400.698491       | 799.405691     | 400.206483       | 7 |
| 4 | 443.250026 | 222.128651      |                |                  | 425.239461     | 213.123369       | L    | 716.368577 | 358.687927      | 699.342028     | 350.174652       | 698.358012     | 349.682644       | 6 |
| 5 | 572.292619 | 286.649948      |                |                  | 554.282054     | 277.644665       | E    | 603.284513 | 302.145894      | 586.257964     | 293.632620       | 585.273948     | 293.140612       | 5 |
| 6 | 686.335546 | 343.671411      | 669.308997     | 335.158137       | 668.324981     | 334.666129       | N    | 474.241920 | 237.624598      | 457.215371     | 229.111323       |                |                  | 4 |
| 7 | 757.372660 | 379.189968      | 740.346111     | 370.676694       | 739.362095     | 370.184686       | A    | 360.198993 | 180.603134      | 343.172444     | 172.089860       |                |                  | 3 |
| 8 | 871.415587 | 436.211432      | 854.389038     | 427.698157       | 853.405022     | 427.206149       | N    | 289.161879 | 145.084577      | 272.135330     | 136.571303       |                |                  | 2 |
| 9 |            |                 |                |                  |                |                  | R    | 175.118952 | 88.063114       | 158.092403     | 79.549839        |                |                  | 1 |

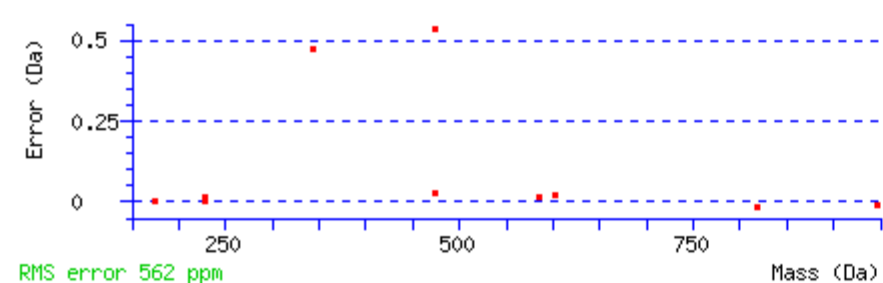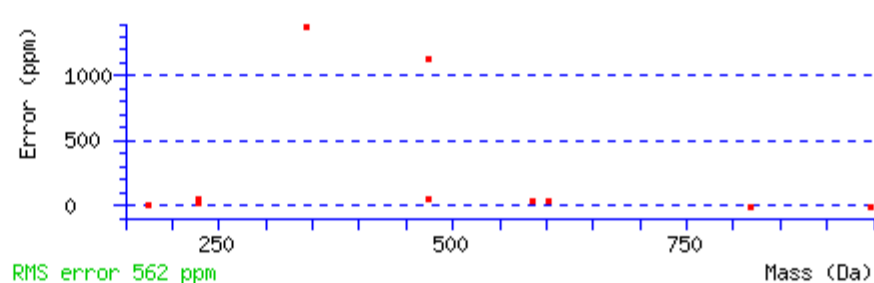

NCBI BLAST search of **VETLENANR**

(Parameters: blastp, nr protein database, expect=20000, no filter, PAM30)

Other BLAST [web gateways](#)

All matches to this query

| Score | Mr(calc):   | Delta     | Sequence                    |
|-------|-------------|-----------|-----------------------------|
| 62.9  | 1044.508743 | 0.005005  | <a href="#">VEDVEALDR</a>   |
| 40.2  | 1044.519958 | -0.006210 | <a href="#">VETLENANR</a>   |
| 16.8  | 1044.524017 | -0.010269 | <a href="#">LDPVFDSPR</a>   |
| 4.4   | 1044.519974 | -0.006226 | <a href="#">VSNGSPSLER</a>  |
| 3.3   | 1044.508713 | 0.005035  | <a href="#">LDAEEAEIR</a>   |
| 2.5   | 1044.519989 | -0.006241 | <a href="#">ATGLQTS DPR</a> |
| 2.3   | 1044.519974 | -0.006226 | <a href="#">LSDQQEAVR</a>   |
| 1.9   | 1044.519958 | -0.006210 | <a href="#">VLDREEER</a>    |
| 1.1   | 1044.519974 | -0.006226 | <a href="#">NEETAQVVR</a>   |
| 0.5   | 1044.510071 | 0.003677  | <a href="#">EKQGQYHR</a>    |

Mascot: <http://www.matrixscience.com/>

# **MASCOT** Mascot Search Results

## Peptide View

### MS/MS Fragmentation of **LSPQMLR**

Found in **CD5R2\_HUMAN**, Cyclin-dependent kinase 5 activator 2 OS=Homo sapiens GN=CDK5R2 PE=1 SV=1

Match to Query 6731: 875.457688 from(438.736120,2+) rtinseconds(1452) index(9354)

Title: Locus:1.1.1.1820.15

Data file 2011-11-10 - TFD - EP 3-6.mgf

Click mouse within plot area to zoom in by factor of two about that point

Or, Plot from  to  Da

Label all possible matches  Label matches used for scoring

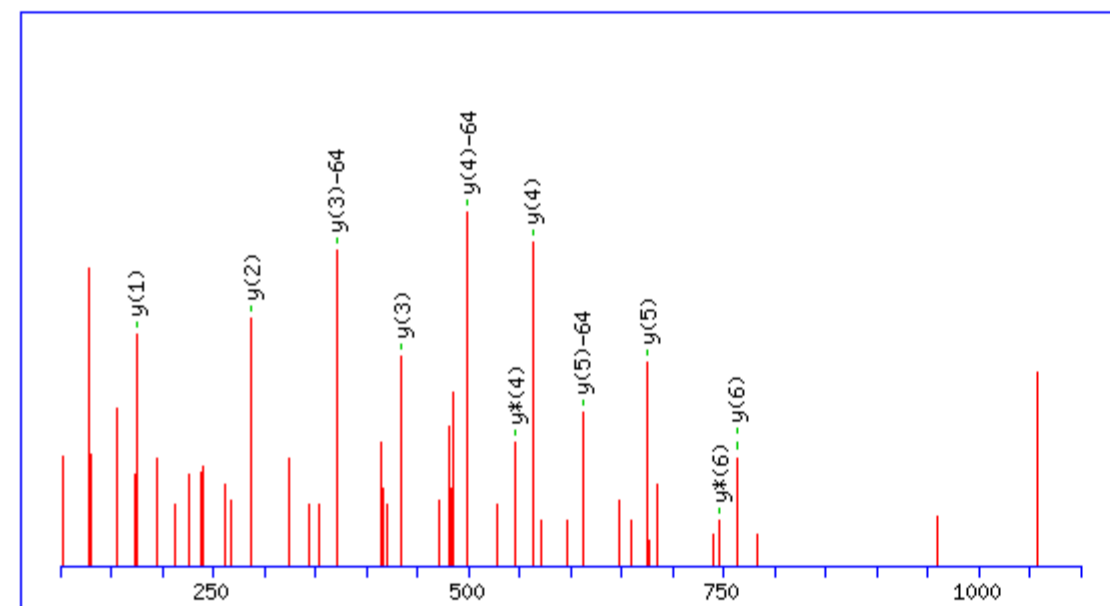

Monoisotopic mass of neutral peptide Mr(calc): 875.453476

Fixed modifications: Propionamide (C) (apply to specified residues or termini only)

Variable modifications:

P3 : Oxidation (P)

M5 : Oxidation (M), with neutral losses 0.000000 (shown in table), 63.998285

Ions Score: 54 Expect: 6.2e-005

Matches : 11/84 fragment ions using 14 most intense peaks [\(help\)](#)

| # | b          | b <sup>++</sup> | b <sup>*</sup> | b <sup>*++</sup> | b <sup>0</sup> | b <sup>0++</sup> | Seq. | y                 | y <sup>++</sup> | y <sup>*</sup>    | y <sup>*++</sup> | y <sup>0</sup> | y <sup>0++</sup> | # |
|---|------------|-----------------|----------------|------------------|----------------|------------------|------|-------------------|-----------------|-------------------|------------------|----------------|------------------|---|
| 1 | 114.091340 | 57.549308       |                |                  |                |                  | L    |                   |                 |                   |                  |                |                  | 7 |
| 2 | 201.123368 | 101.065322      |                |                  | 183.112803     | 92.060039        | S    | <b>763.376701</b> | 382.191989      | <b>746.350152</b> | 373.678714       | 745.366136     | 373.186706       | 6 |
| 3 | 314.171047 | 157.589161      |                |                  | 296.160482     | 148.583879       | P    | <b>676.344673</b> | 338.675975      | 659.318124        | 330.162700       |                |                  | 5 |
| 4 | 442.229625 | 221.618450      | 425.203076     | 213.105176       | 424.219060     | 212.613168       | Q    | <b>563.296994</b> | 282.152135      | <b>546.270445</b> | 273.638861       |                |                  | 4 |
| 5 | 589.265025 | 295.136151      | 572.238476     | 286.622876       | 571.254460     | 286.130868       | M    | <b>435.238416</b> | 218.122846      | 418.211867        | 209.609571       |                |                  | 3 |
| 6 | 702.349089 | 351.678183      | 685.322540     | 343.164908       | 684.338524     | 342.672900       | L    | <b>288.203016</b> | 144.605146      | 271.176467        | 136.091871       |                |                  | 2 |
| 7 |            |                 |                |                  |                |                  | R    | <b>175.118952</b> | 88.063114       | 158.092403        | 79.549839        |                |                  | 1 |

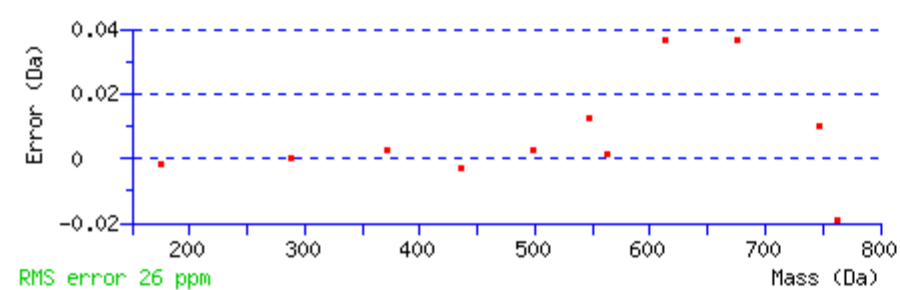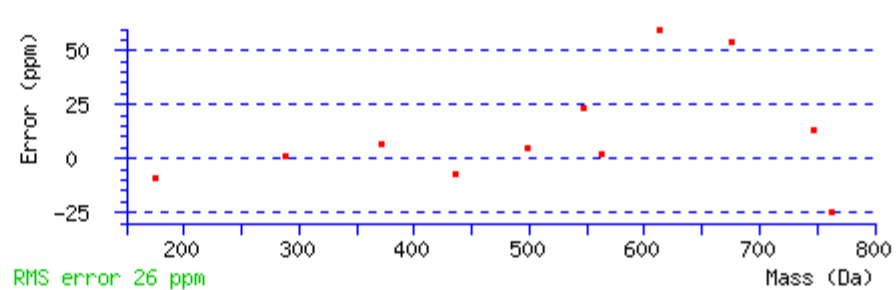

### NCBI BLAST search of **LSPQMLR**

(Parameters: blastp, nr protein database, expect=20000, no filter, PAM30)

Other BLAST [web gateways](#)

### All matches to this query

| Score | Mr(calc):  | Delta     | Sequence                 |
|-------|------------|-----------|--------------------------|
| 54.5  | 875.453476 | 0.004212  | <a href="#">LSPQMLR</a>  |
| 36.2  | 875.453461 | 0.004227  | <a href="#">EALQMLR</a>  |
| 29.1  | 875.450104 | 0.007584  | <a href="#">LAEQFPR</a>  |
| 20.4  | 875.453476 | 0.004212  | <a href="#">SPIMQIR</a>  |
| 17.4  | 875.453476 | 0.004212  | <a href="#">LNDVMLR</a>  |
| 13.5  | 875.453461 | 0.004227  | <a href="#">LSMQELR</a>  |
| 9.2   | 875.453476 | 0.004212  | <a href="#">IAGSLPMR</a> |
| 8.7   | 875.461349 | -0.003661 | <a href="#">LHPQPPR</a>  |
| 6.4   | 875.461349 | -0.003661 | <a href="#">HPPKPPR</a>  |
| 6.4   | 875.461349 | -0.003661 | <a href="#">HPPKPPR</a>  |

# MASCOT SCIENCE Mascot Search Results

## Peptide View

MS/MS Fragmentation of **EVYFAER**

Found in **CRIP1\_HUMAN**, Cysteine-rich protein 1 OS=Homo sapiens GN=CRIP1 PE=1 SV=3

Match to Query 143433: 912.437128 from(457.225840,2+) rtinseconds(1798) index(912144)

Title: Locus:1.1.1.1085.11

Data file C:\Program Files (x86)\Matrix Science\Mascot Daemon\mgf3 TFD - Epitel - R2\mascot\_daemon\_merge.mgf

Click mouse within plot area to zoom in by factor of two about that point

Or, Plot from  to  Da

Label all possible matches  Label matches used for scoring

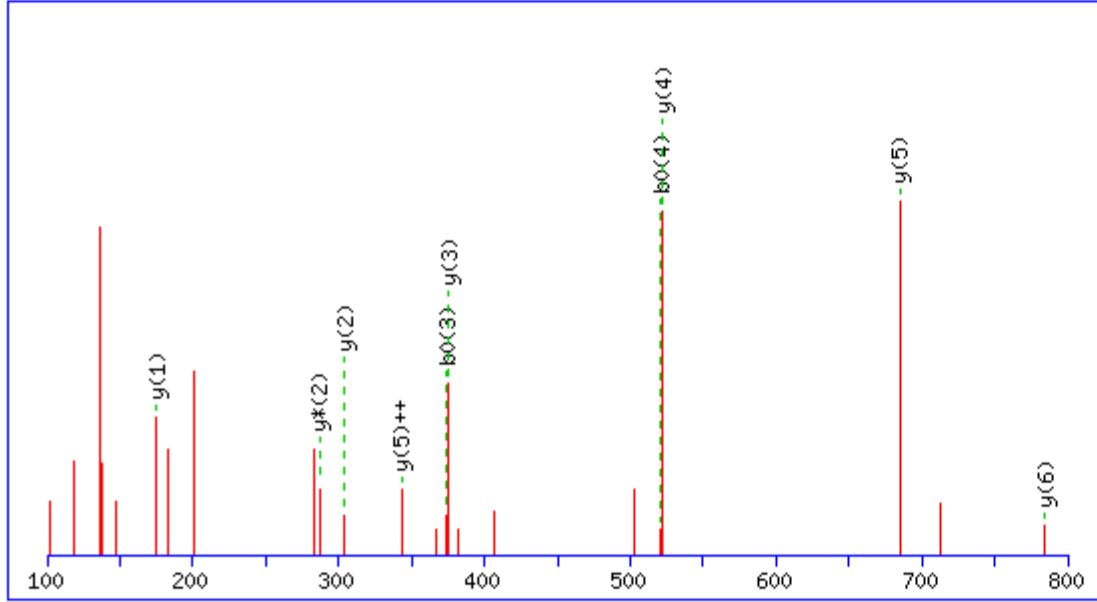

Monoisotopic mass of neutral peptide Mr(calc): 912.434113

Fixed modifications: Carbamidomethyl (C) (apply to specified residues or termini only)

Ions Score: 36 Expect: 0.0029

Matches : 10/58 fragment ions using 17 most intense peaks [\(help\)](#)

| # | b          | b <sup>++</sup> | b <sup>0</sup> | b <sup>0++</sup> | Seq. | y          | y <sup>++</sup> | y <sup>*</sup> | y <sup>*++</sup> | y <sup>0</sup> | y <sup>0++</sup> | # |
|---|------------|-----------------|----------------|------------------|------|------------|-----------------|----------------|------------------|----------------|------------------|---|
| 1 | 130.049869 | 65.528572       | 112.039304     | 56.523290        | E    |            |                 |                |                  |                |                  | 7 |
| 2 | 229.118283 | 115.062780      | 211.107718     | 106.057497       | V    | 784.398816 | 392.703046      | 767.372267     | 384.189772       | 766.388251     | 383.697764       | 6 |
| 3 | 392.181612 | 196.594444      | 374.171047     | 187.589162       | Y    | 685.330402 | 343.168839      | 668.303853     | 334.655565       | 667.319837     | 334.163557       | 5 |
| 4 | 539.250026 | 270.128651      | 521.239461     | 261.123369       | F    | 522.267073 | 261.637175      | 505.240524     | 253.123900       | 504.256508     | 252.631892       | 4 |
| 5 | 610.287140 | 305.647208      | 592.276575     | 296.641926       | A    | 375.198659 | 188.102967      | 358.172110     | 179.589693       | 357.188094     | 179.097685       | 3 |
| 6 | 739.329733 | 370.168505      | 721.319168     | 361.163222       | E    | 304.161545 | 152.584410      | 287.134996     | 144.071136       | 286.150980     | 143.579128       | 2 |
| 7 |            |                 |                |                  | R    | 175.118952 | 88.063114       | 158.092403     | 79.549839        |                |                  | 1 |

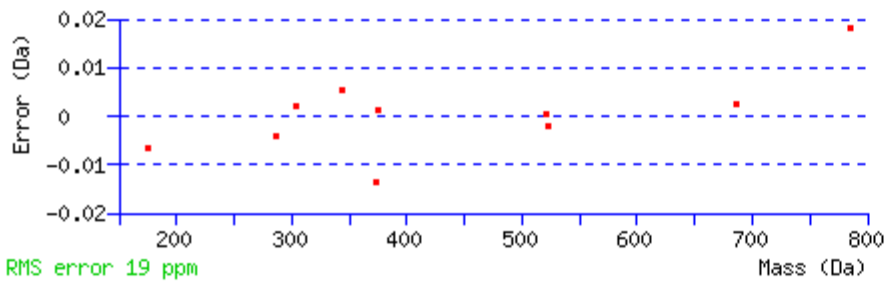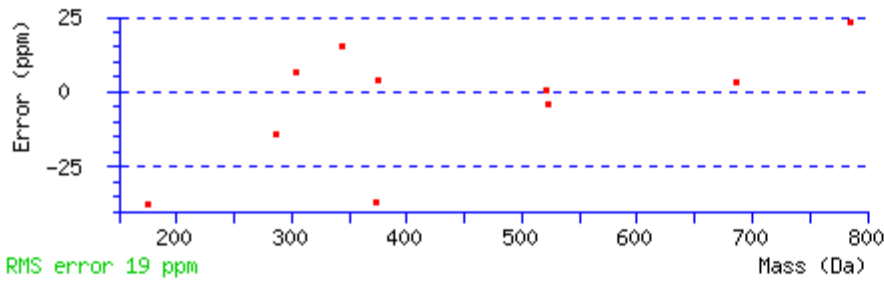

NCBI BLAST search of [EVYFAER](#)

(Parameters: blastp, nr protein database, expect=20000, no filter, PAM30)

Other BLAST [web gateways](#)

## All matches to this query

| Score | Mr(calc):  | Delta     | Sequence                  |
|-------|------------|-----------|---------------------------|
| 35.6  | 912.434113 | 0.003015  | <a href="#">EVYFAER</a>   |
| 11.6  | 912.441330 | -0.004202 | <a href="#">EVSSHAQR</a>  |
| 8.0   | 912.437485 | -0.000357 | <a href="#">YLDMISR</a>   |
| 5.5   | 912.430954 | 0.006174  | <a href="#">MPHLMER</a>   |
| 5.0   | 912.445389 | -0.008261 | <a href="#">GGPPFPGPR</a> |
| 3.4   | 912.445343 | -0.008215 | <a href="#">ASAPWPER</a>  |
| 3.0   | 912.434128 | 0.003000  | <a href="#">PDYSIFR</a>   |
| 2.9   | 912.437485 | -0.000357 | <a href="#">DILSYMR</a>   |
| 2.9   | 912.437485 | -0.000357 | <a href="#">IDLSMYR</a>   |
| 2.8   | 912.430084 | 0.007044  | <a href="#">EAAGPPEAR</a> |

# **MASCOT** Mascot Search Results

## Peptide View

MS/MS Fragmentation of **PTISLIENK**

Found in **CYB\_HUMAN**, Cytochrome b OS=Homo sapiens GN=MT-CYB PE=1 SV=1

Match to Query 279503: 1013.576128 from(507.795340,2+) rtinseconds(2121) index(597167)

Title: Locus:1.1.1.1133.8

Data file C:\Program Files (x86)\Matrix Science\Mascot Daemon\mgf\3 TFD - Epitel - R2\mascot\_daemon\_merge.mgf

Click mouse within plot area to zoom in by factor of two about that point

Or, Plot from  to  Da

Label all possible matches  Label matches used for scoring

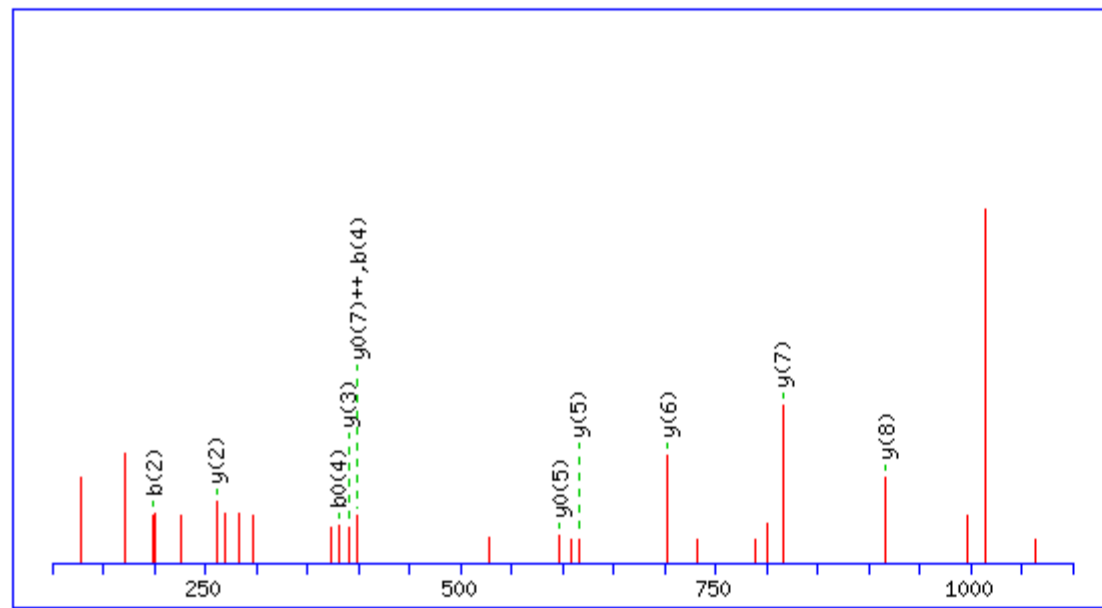

Monoisotopic mass of neutral peptide Mr(calc): 1013.575684

Fixed modifications: Carbamidomethyl (C) (apply to specified residues or termini only)

Ions Score: 34 Expect: 0.002

Matches : 11/76 fragment ions using 23 most intense peaks [\(help\)](#)

| # | b                 | b <sup>++</sup> | b <sup>*</sup> | b <sup>*++</sup> | b <sup>0</sup>    | b <sup>0++</sup> | Seq. | y                 | y <sup>++</sup> | y <sup>*</sup> | y <sup>*++</sup> | y <sup>0</sup>    | y <sup>0++</sup>  | # |
|---|-------------------|-----------------|----------------|------------------|-------------------|------------------|------|-------------------|-----------------|----------------|------------------|-------------------|-------------------|---|
| 1 | 98.060040         | 49.533658       |                |                  |                   |                  | P    |                   |                 |                |                  |                   |                   | 9 |
| 2 | <b>199.107719</b> | 100.057497      |                |                  | 181.097154        | 91.052215        | T    | <b>917.530223</b> | 459.268750      | 900.503674     | 450.755475       | 899.519658        | 450.263467        | 8 |
| 3 | 312.191783        | 156.599529      |                |                  | 294.181218        | 147.594247       | I    | <b>816.482544</b> | 408.744910      | 799.455995     | 400.231636       | 798.471979        | <b>399.739628</b> | 7 |
| 4 | <b>399.223811</b> | 200.115544      |                |                  | <b>381.213246</b> | 191.110261       | S    | <b>703.398480</b> | 352.202878      | 686.371931     | 343.689604       | 685.387915        | 343.197596        | 6 |
| 5 | 512.307875        | 256.657576      |                |                  | 494.297310        | 247.652293       | L    | <b>616.366452</b> | 308.686864      | 599.339903     | 300.173590       | <b>598.355887</b> | 299.681582        | 5 |
| 6 | 625.391939        | 313.199608      |                |                  | 607.381374        | 304.194325       | I    | 503.282388        | 252.144832      | 486.255839     | 243.631557       | 485.271823        | 243.139549        | 4 |
| 7 | 754.434532        | 377.720904      |                |                  | 736.423967        | 368.715622       | E    | <b>390.198324</b> | 195.602800      | 373.171775     | 187.089525       | 372.187759        | 186.597517        | 3 |
| 8 | 868.477459        | 434.742368      | 851.450910     | 426.229093       | 850.466894        | 425.737085       | N    | <b>261.155731</b> | 131.081503      | 244.129182     | 122.568229       |                   |                   | 2 |
| 9 |                   |                 |                |                  |                   |                  | K    | 147.112804        | 74.060040       | 130.086255     | 65.546765        |                   |                   | 1 |

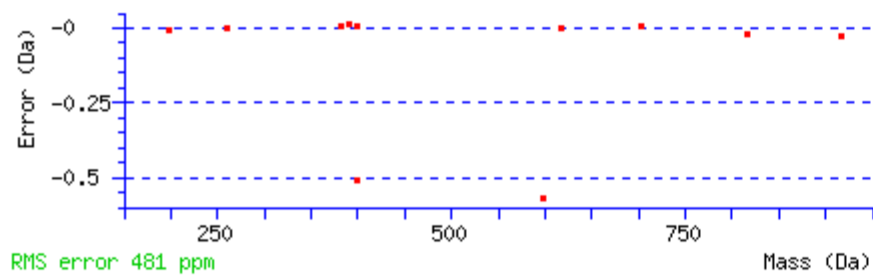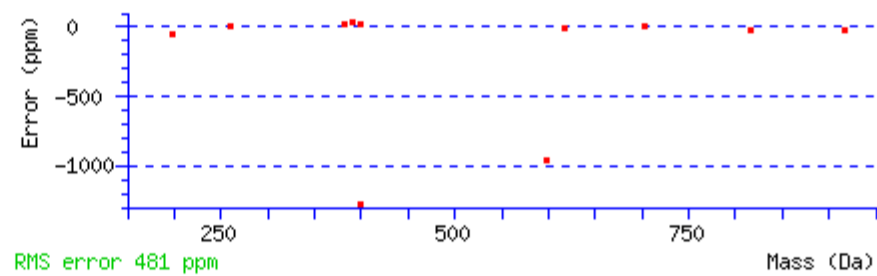

NCBI BLAST search of [PTISLIENK](#)

(Parameters: blastp, nr protein database, expect=20000, no filter, PAM30)

Other BLAST [web gateways](#)

## All matches to this query

| Score | Mr(calc):   | Delta    | Sequence                   |
|-------|-------------|----------|----------------------------|
| 34.4  | 1013.575684 | 0.000444 | <a href="#">PTISLIENK</a>  |
| 5.5   | 1013.575699 | 0.000429 | <a href="#">GLLDGIELGK</a> |
| 1.9   | 1013.575714 | 0.000414 | <a href="#">VVIVNPETK</a>  |

Mascot: <http://www.matrixscience.com/>

# **MATRIX** SCIENCE Mascot Search Results

## Peptide View

MS/MS Fragmentation of **LELCDER**

Found in **QCR6\_HUMAN**, Cytochrome b-c1 complex subunit 6, mitochondrial OS=Homo sapiens GN=UQCRH PE=1 SV=2

Match to Query 172290: 933.423428 from(467.718990,2+) rtinseconds(1518) index(502740)

Title: Locus:1.1.1.907.11

Data file C:\Program Files (x86)\Matrix Science\Mascot Daemon\mgf3 TFD - Epitel - R2\mascot\_daemon\_merge.mgf

Click mouse within plot area to zoom in by factor of two about that point

Or, Plot from  to  Da

Label all possible matches  Label matches used for scoring

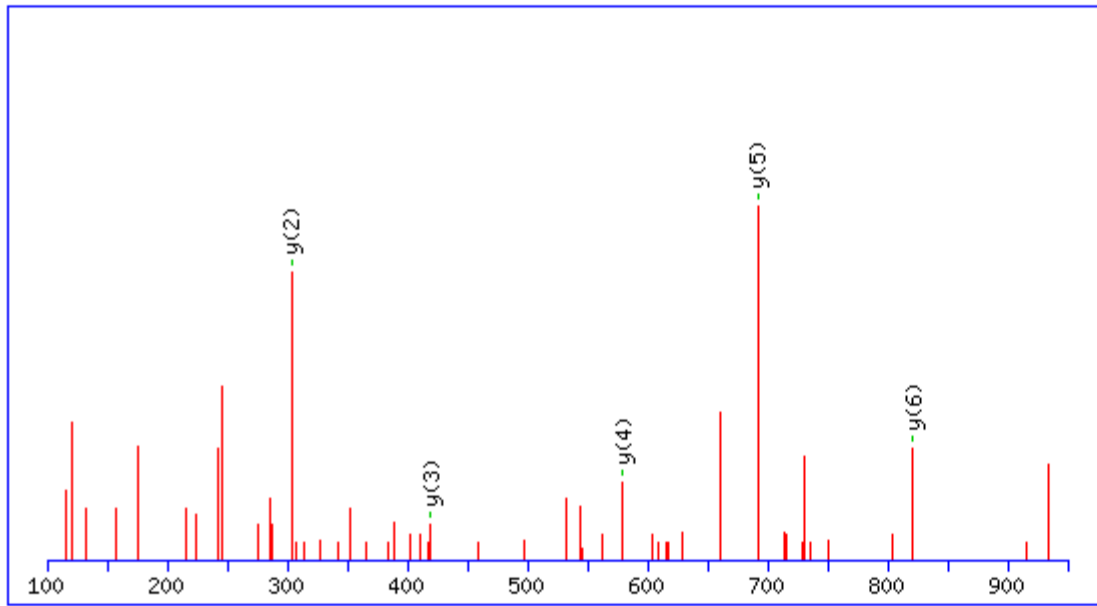

Monoisotopic mass of neutral peptide Mr(calc): 933.422562

Fixed modifications: Carbamidomethyl (C) (apply to specified residues or termini only)

Ions Score: 33 Expect: 0.0057

Matches : 5/56 fragment ions using 9 most intense peaks ([help](#))

| # | b          | b <sup>++</sup> | b <sup>0</sup> | b <sup>0++</sup> | Seq. | y                 | y <sup>++</sup> | y <sup>*</sup> | y <sup>*++</sup> | y <sup>0</sup> | y <sup>0++</sup> | # |
|---|------------|-----------------|----------------|------------------|------|-------------------|-----------------|----------------|------------------|----------------|------------------|---|
| 1 | 114.091340 | 57.549308       |                |                  | L    |                   |                 |                |                  |                |                  | 7 |
| 2 | 243.133933 | 122.070605      | 225.123368     | 113.065322       | E    | <b>821.345794</b> | 411.176535      | 804.319245     | 402.663261       | 803.335229     | 402.171253       | 6 |
| 3 | 356.217997 | 178.612637      | 338.207432     | 169.607354       | L    | <b>692.303201</b> | 346.655239      | 675.276652     | 338.141964       | 674.292636     | 337.649956       | 5 |
| 4 | 516.248646 | 258.627961      | 498.238081     | 249.622679       | C    | <b>579.219137</b> | 290.113207      | 562.192588     | 281.599932       | 561.208572     | 281.107924       | 4 |
| 5 | 631.275589 | 316.141433      | 613.265024     | 307.136150       | D    | <b>419.188488</b> | 210.097882      | 402.161939     | 201.584608       | 401.177923     | 201.092600       | 3 |
| 6 | 760.318182 | 380.662729      | 742.307617     | 371.657447       | E    | <b>304.161545</b> | 152.584411      | 287.134996     | 144.071136       | 286.150980     | 143.579128       | 2 |
| 7 |            |                 |                |                  | R    | 175.118952        | 88.063114       | 158.092403     | 79.549840        |                |                  | 1 |

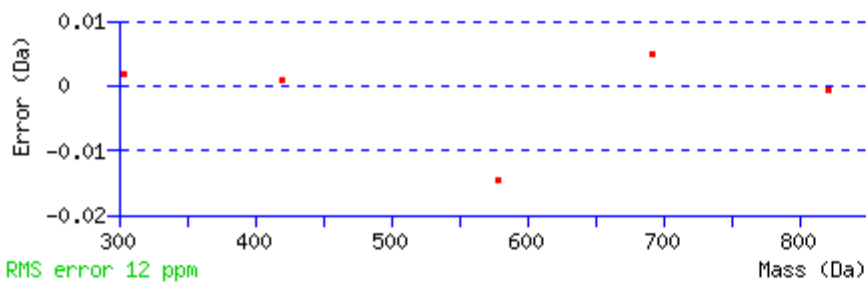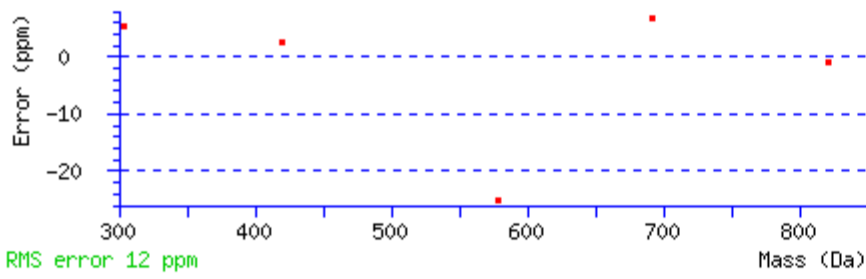

NCBI BLAST search of [LELCDER](#)

(Parameters: blastp, nr protein database, expect=20000, no filter, PAM30)

Other BLAST [web gateways](#)

## All matches to this query

| Score | Mr(calc):  | Delta     | Sequence                 |
|-------|------------|-----------|--------------------------|
| 33.4  | 933.422562 | 0.000866  | <a href="#">LELCDER</a>  |
| 19.6  | 933.422562 | 0.000866  | <a href="#">CIELDER</a>  |
| 5.9   | 933.427277 | -0.003849 | <a href="#">MSPCGRAR</a> |
| 4.8   | 933.430450 | -0.007022 | <a href="#">WSVNGDTR</a> |
| 4.2   | 933.422577 | 0.000851  | <a href="#">IPECQGSK</a> |
| 3.1   | 933.422562 | 0.000866  | <a href="#">CLEEEVR</a>  |
| 2.2   | 933.422546 | 0.000882  | <a href="#">IQEMEER</a>  |
| 0.0   | 933.422562 | 0.000866  | <a href="#">EIIDECR</a>  |



# MASCOT Search Results

## Peptide View

MS/MS Fragmentation of **LPENLYNDR**

Found in **QCR7\_HUMAN**, Cytochrome b-c1 complex subunit 7 OS=Homo sapiens GN=UQCRB PE=1 SV=2

Match to Query 24324: 1132.548988 from(567.281770,2+) rtinseconds(1935) index(13961)

Title: Locus:1.1.1.2194.33

Data file 2011-11-10 - TFD - EP 4-7.mgf

Click mouse within plot area to zoom in by factor of two about that point

Or, Plot from  to  Da

Label all possible matches  Label matches used for scoring

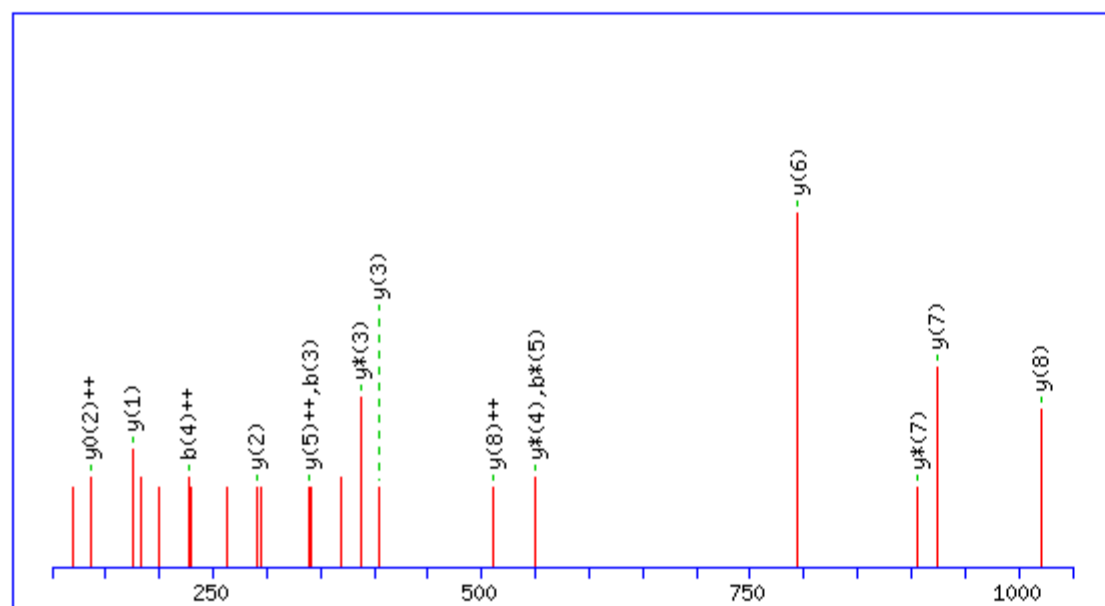

Monoisotopic mass of neutral peptide Mr(calc): 1132.551254

Fixed modifications: Propionamide (C) (apply to specified residues or termini only)

Ions Score: 39 Expect: 0.00069

Matches : 15/84 fragment ions using 22 most intense peaks ([help](#))

| # | b          | b <sup>++</sup> | b <sup>*</sup> | b <sup>+++</sup> | b <sup>0</sup> | b <sup>0++</sup> | Seq. | y           | y <sup>++</sup> | y <sup>*</sup> | y <sup>+++</sup> | y <sup>0</sup> | y <sup>0++</sup> | # |
|---|------------|-----------------|----------------|------------------|----------------|------------------|------|-------------|-----------------|----------------|------------------|----------------|------------------|---|
| 1 | 114.091340 | 57.549308       |                |                  |                |                  | L    |             |                 |                |                  |                |                  | 9 |
| 2 | 211.144104 | 106.075690      |                |                  |                |                  | P    | 1020.474499 | 510.740888      | 1003.447950    | 502.227613       | 1002.463934    | 501.735605       | 8 |
| 3 | 340.186697 | 170.596986      |                |                  | 322.176132     | 161.591704       | E    | 923.421735  | 462.214506      | 906.395186     | 453.701231       | 905.411170     | 453.209223       | 7 |
| 4 | 454.229624 | 227.618450      | 437.203075     | 219.105176       | 436.219059     | 218.613168       | N    | 794.379142  | 397.693209      | 777.352593     | 389.179935       | 776.368577     | 388.687927       | 6 |
| 5 | 567.313688 | 284.160482      | 550.287139     | 275.647208       | 549.303123     | 275.155200       | L    | 680.336215  | 340.671746      | 663.309666     | 332.158471       | 662.325650     | 331.666463       | 5 |
| 6 | 730.377017 | 365.692147      | 713.350468     | 357.178872       | 712.366452     | 356.686864       | Y    | 567.252151  | 284.129714      | 550.225602     | 275.616439       | 549.241586     | 275.124431       | 4 |
| 7 | 844.419944 | 422.713610      | 827.393395     | 414.200335       | 826.409379     | 413.708328       | N    | 404.188822  | 202.598049      | 387.162273     | 194.084774       | 386.178257     | 193.592766       | 3 |
| 8 | 959.446887 | 480.227082      | 942.420338     | 471.713807       | 941.436322     | 471.221799       | D    | 290.145895  | 145.576585      | 273.119346     | 137.063311       | 272.135330     | 136.571303       | 2 |
| 9 |            |                 |                |                  |                |                  | R    | 175.118952  | 88.063114       | 158.092403     | 79.549840        |                |                  | 1 |

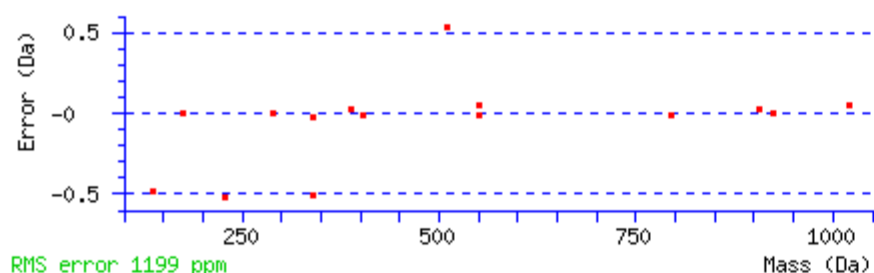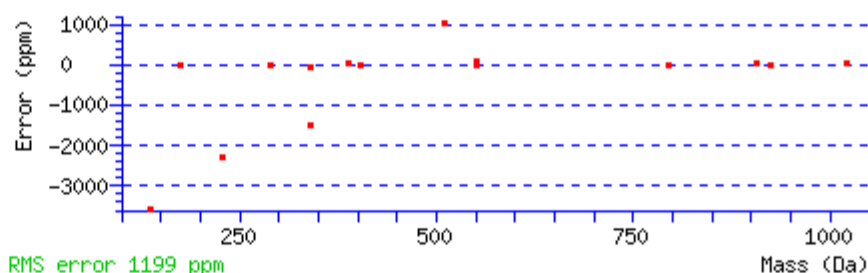

NCBI BLAST search of **LPENLYNDR**

(Parameters: blastp, nr protein database, expect=20000, no filter, PAM30)

Other BLAST [web gateways](#)

All matches to this query

| Score | Mr(calc):   | Delta     | Sequence                  |
|-------|-------------|-----------|---------------------------|
| 39.2  | 1132.551254 | -0.002266 | <a href="#">LPENLYNDR</a> |
| 5.1   | 1132.548767 | 0.000221  | <a href="#">IMWHIDYR</a>  |
| 0.0   | 1132.543381 | 0.005607  | <a href="#">MLKENPEEK</a> |

Mascot: <http://www.matrixscience.com/>

# MASCOT Search Results

## Peptide View

MS/MS Fragmentation of **HVISYSLSPFEQR**

Found in **QCR8\_HUMAN**, Cytochrome b-c1 complex subunit 8 OS=Homo sapiens GN=UQCRQ PE=1 SV=4

Match to Query 41732: 1561.785072 from(521.602300,3+) rtinseconds(2578) index(27508)

Title: Locus:1.1.1.2314.21

Data file 2011-11-12 - TFD - EP 6-7.mgf

Click mouse within plot area to zoom in by factor of two about that point

Or, Plot from  to  Da

Label all possible matches  Label matches used for scoring

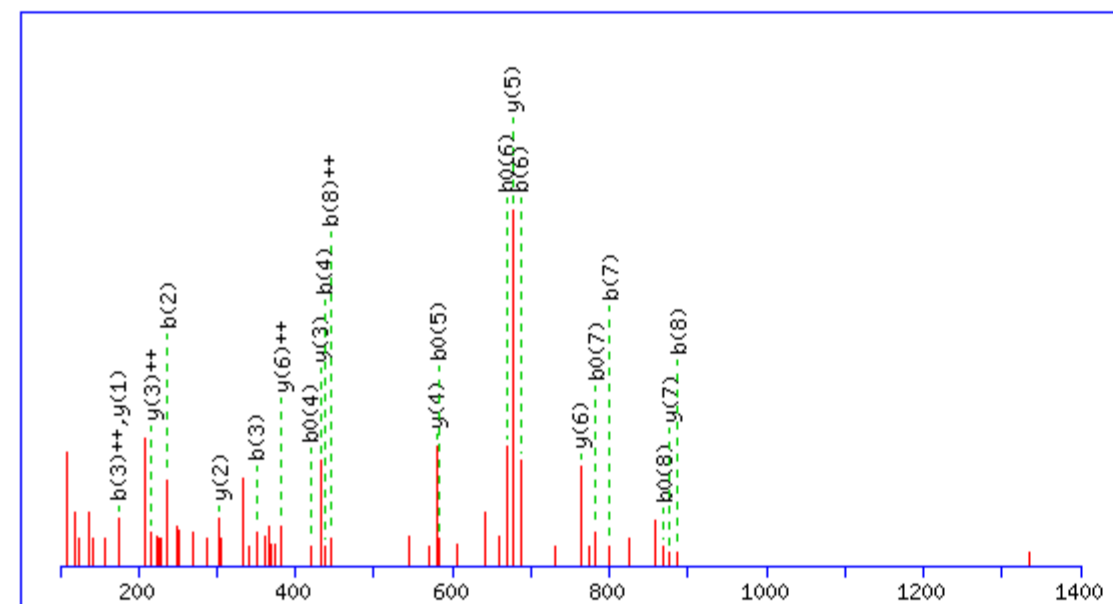

Monoisotopic mass of neutral peptide Mr(calc): 1561.788879

Fixed modifications: Propionamide (C) (apply to specified residues or termini only)

Ions Score: 39 Expect: 0.0018

Matches : 22/112 fragment ions using 41 most intense peaks [\(help\)](#)

| #  | b                 | b <sup>++</sup>   | b <sup>+</sup> | b <sup>++</sup> | b <sup>0</sup>    | b <sup>0++</sup> | Seq. | y                 | y <sup>++</sup>   | y <sup>+</sup> | y <sup>++</sup> | y <sup>0</sup> | y <sup>0++</sup> | #  |
|----|-------------------|-------------------|----------------|-----------------|-------------------|------------------|------|-------------------|-------------------|----------------|-----------------|----------------|------------------|----|
| 1  | 138.066188        | 69.536732         |                |                 |                   |                  | H    |                   |                   |                |                 |                |                  | 13 |
| 2  | <b>237.134602</b> | 119.070939        |                |                 |                   |                  | V    | 1425.737256       | 713.372266        | 1408.710707    | 704.858992      | 1407.726691    | 704.366984       | 12 |
| 3  | <b>350.218666</b> | <b>175.612971</b> |                |                 |                   |                  | I    | 1326.668842       | 663.838059        | 1309.642293    | 655.324785      | 1308.658277    | 654.832777       | 11 |
| 4  | <b>437.250694</b> | 219.128985        |                |                 | <b>419.240129</b> | 210.123703       | S    | 1213.584778       | 607.296027        | 1196.558229    | 598.782753      | 1195.574213    | 598.290745       | 10 |
| 5  | 600.314023        | 300.660650        |                |                 | <b>582.303458</b> | 291.655367       | Y    | 1126.552750       | 563.780013        | 1109.526201    | 555.266739      | 1108.542185    | 554.774731       | 9  |
| 6  | <b>687.346051</b> | 344.176664        |                |                 | <b>669.335486</b> | 335.171381       | S    | 963.489421        | 482.248349        | 946.462872     | 473.735074      | 945.478856     | 473.243066       | 8  |
| 7  | <b>800.430115</b> | 400.718696        |                |                 | <b>782.419550</b> | 391.713413       | L    | <b>876.457393</b> | 438.732335        | 859.430844     | 430.219060      | 858.446828     | 429.727052       | 7  |
| 8  | <b>887.462143</b> | <b>444.234710</b> |                |                 | <b>869.451578</b> | 435.229427       | S    | <b>763.373329</b> | <b>382.190303</b> | 746.346780     | 373.677028      | 745.362764     | 373.185020       | 6  |
| 9  | 984.514907        | 492.761092        |                |                 | 966.504342        | 483.755809       | P    | <b>676.341301</b> | 338.674289        | 659.314752     | 330.161014      | 658.330736     | 329.669006       | 5  |
| 10 | 1131.583321       | 566.295299        |                |                 | 1113.572756       | 557.290016       | F    | <b>579.288537</b> | 290.147907        | 562.261988     | 281.634632      | 561.277972     | 281.142624       | 4  |
| 11 | 1260.625914       | 630.816595        |                |                 | 1242.615349       | 621.811312       | E    | <b>432.220123</b> | <b>216.613699</b> | 415.193574     | 208.100425      | 414.209558     | 207.608417       | 3  |
| 12 | 1388.684492       | 694.845884        | 1371.657943    | 686.332610      | 1370.673927       | 685.840602       | Q    | <b>303.177530</b> | 152.092403        | 286.150981     | 143.579129      |                |                  | 2  |
| 13 |                   |                   |                |                 |                   |                  | R    | <b>175.118952</b> | 88.063114         | 158.092403     | 79.549839       |                |                  | 1  |

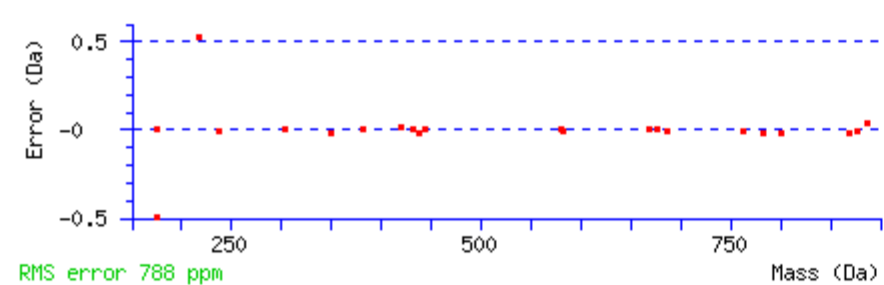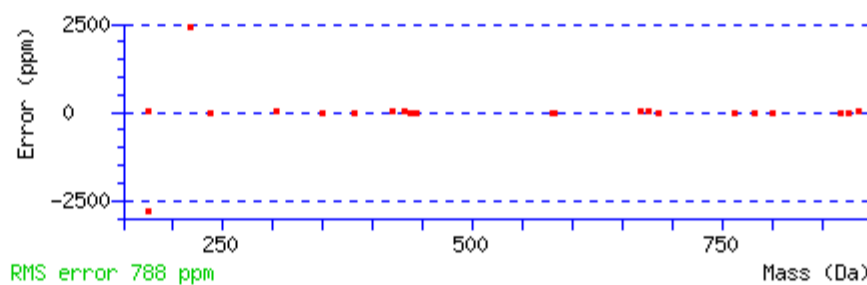

NCBI BLAST search of **HVISYSLSPFEQR**

(Parameters: blastp, nr protein database, expect=20000, no filter, PAM30)

Other BLAST [web gateways](#)

## All matches to this query

| Score | Mr(calc):   | Delta     | Sequence                        |
|-------|-------------|-----------|---------------------------------|
| 38.6  | 1561.788879 | -0.003807 | <a href="#">HVISYSLSPFEQR</a>   |
| 10.3  | 1561.770447 | 0.014625  | <a href="#">RMQDLNLAMDALR</a>   |
| 9.9   | 1561.784851 | 0.000221  | <a href="#">TSPLYDRLDAQGAR</a>  |
| 5.5   | 1561.781006 | 0.004066  | <a href="#">HLVMKLSYGPEEK</a>   |
| 4.1   | 1561.792267 | -0.007195 | <a href="#">RTTGAPDITWGMLK</a>  |
| 2.6   | 1561.799637 | -0.014565 | <a href="#">TALWCALQMTLPK</a>   |
| 0.7   | 1561.774506 | 0.010566  | <a href="#">MLYVPVMPGHAKR</a>   |
| 0.5   | 1561.794769 | -0.009697 | <a href="#">SSLGSLQTPEAVTTR</a> |

# MASCOT SCIENCE Mascot Search Results

## Peptide View

### MS/MS Fragmentation of **LYSLLFR**

Found in **QCR9\_HUMAN**, Cytochrome b-c1 complex subunit 9 OS=Homo sapiens GN=UQCR10 PE=1 SV=3

Match to Query 7405: 910.532908 from(456.273730,2+) rtinseconds(3136) index(17807)

Title: Locus:1.1.1.2916.3

Data file 2011-11-14 - TFD - EP 8-8.mgf

Click mouse within plot area to zoom in by factor of two about that point

Or, Plot from  to  Da

Label all possible matches  Label matches used for scoring

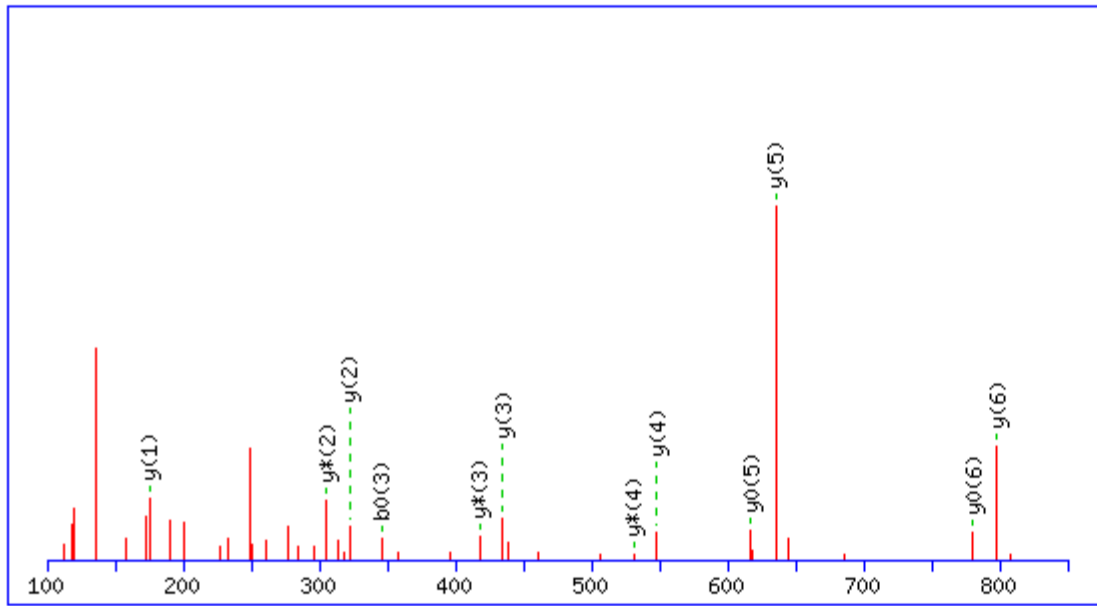

Monoisotopic mass of neutral peptide Mr(calc): 910.527618

Fixed modifications: Propionamide (C) (apply to specified residues or termini only)

Ions Score: 53 Expect: 1.7e-005

Matches : 12/48 fragment ions using 14 most intense peaks [\(help\)](#)

| # | b          | b <sup>++</sup> | b <sup>0</sup>    | b <sup>0++</sup> | Seq. | y                 | y <sup>++</sup> | y <sup>*</sup>    | y <sup>*++</sup> | y <sup>0</sup>    | y <sup>0++</sup> | # |
|---|------------|-----------------|-------------------|------------------|------|-------------------|-----------------|-------------------|------------------|-------------------|------------------|---|
| 1 | 114.091340 | 57.549308       |                   |                  | L    |                   |                 |                   |                  |                   |                  | 7 |
| 2 | 277.154669 | 139.080973      |                   |                  | Y    | <b>798.450851</b> | 399.729064      | 781.424302        | 391.215789       | <b>780.440286</b> | 390.723781       | 6 |
| 3 | 364.186697 | 182.596987      | <b>346.176132</b> | 173.591704       | S    | <b>635.387522</b> | 318.197399      | 618.360973        | 309.684125       | <b>617.376957</b> | 309.192117       | 5 |
| 4 | 477.270761 | 239.139019      | 459.260196        | 230.133736       | L    | <b>548.355494</b> | 274.681385      | <b>531.328945</b> | 266.168111       |                   |                  | 4 |
| 5 | 590.354825 | 295.681051      | 572.344260        | 286.675768       | L    | <b>435.271430</b> | 218.139353      | <b>418.244881</b> | 209.626079       |                   |                  | 3 |
| 6 | 737.423239 | 369.215258      | 719.412674        | 360.209975       | F    | <b>322.187366</b> | 161.597321      | <b>305.160817</b> | 153.084047       |                   |                  | 2 |
| 7 |            |                 |                   |                  | R    | <b>175.118952</b> | 88.063114       | 158.092403        | 79.549840        |                   |                  | 1 |

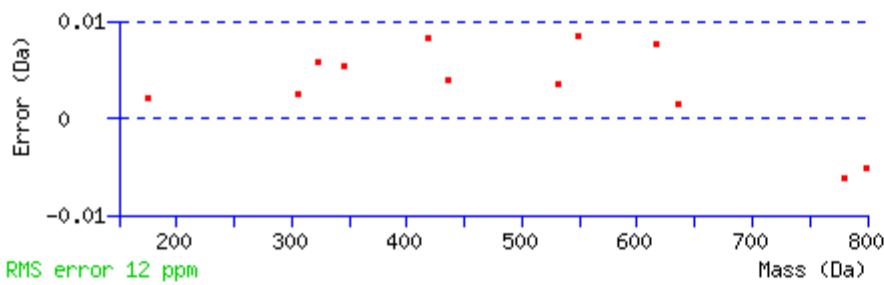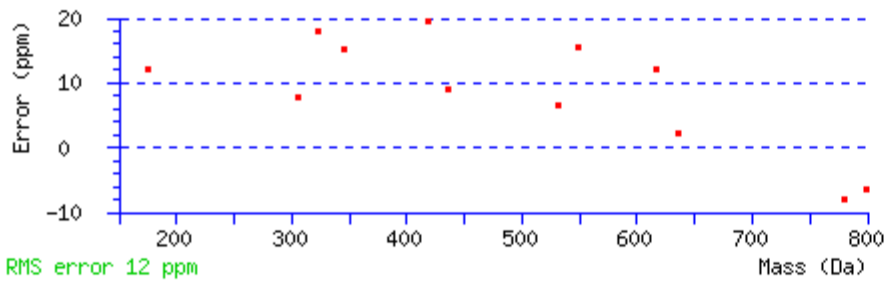

### NCBI BLAST search of **LYSLLFR**

(Parameters: blastp, nr protein database, expect=20000, no filter, PAM30)

Other BLAST [web gateways](#)

### All matches to this query

| Score | Mr(calc):  | Delta     | Sequence                 |
|-------|------------|-----------|--------------------------|
| 52.7  | 910.527618 | 0.005290  | <a href="#">LYSLLFR</a>  |
| 9.5   | 910.534821 | -0.001913 | <a href="#">LRQLPER</a>  |
| 9.3   | 910.527618 | 0.005290  | <a href="#">LYIIFSR</a>  |
| 5.7   | 910.534836 | -0.001928 | <a href="#">IGVNQPKR</a> |
| 4.6   | 910.538864 | -0.005956 | <a href="#">IPILHFR</a>  |
| 4.3   | 910.534836 | -0.001928 | <a href="#">LPRLPQR</a>  |
| 0.4   | 910.538864 | -0.005956 | <a href="#">LHFPLL</a>   |
| 0.0   | 910.534821 | -0.001913 | <a href="#">RGAEILPR</a> |

# MASCOT SCIENCE Mascot Search Results

## Peptide View

MS/MS Fragmentation of **IIAIPGTVK**

Found in **COXI\_HUMAN**, Cytochrome c oxidase subunit 1 OS=Homo sapiens GN=MT-CO1 PE=1 SV=1

Match to Query 141802: 910.586728 from(456.300640,2+) rtinseconds(2308) index(600750)

Title: Locus:1.1.1.1205.6

Data file C:\Program Files (x86)\Matrix Science\Mascot Daemon\mgf3 TFD - Epitel - R2\mascot\_daemon\_merge.mgf

Click mouse within plot area to zoom in by factor of two about that point

Or, Plot from  to  Da

Label all possible matches  Label matches used for scoring

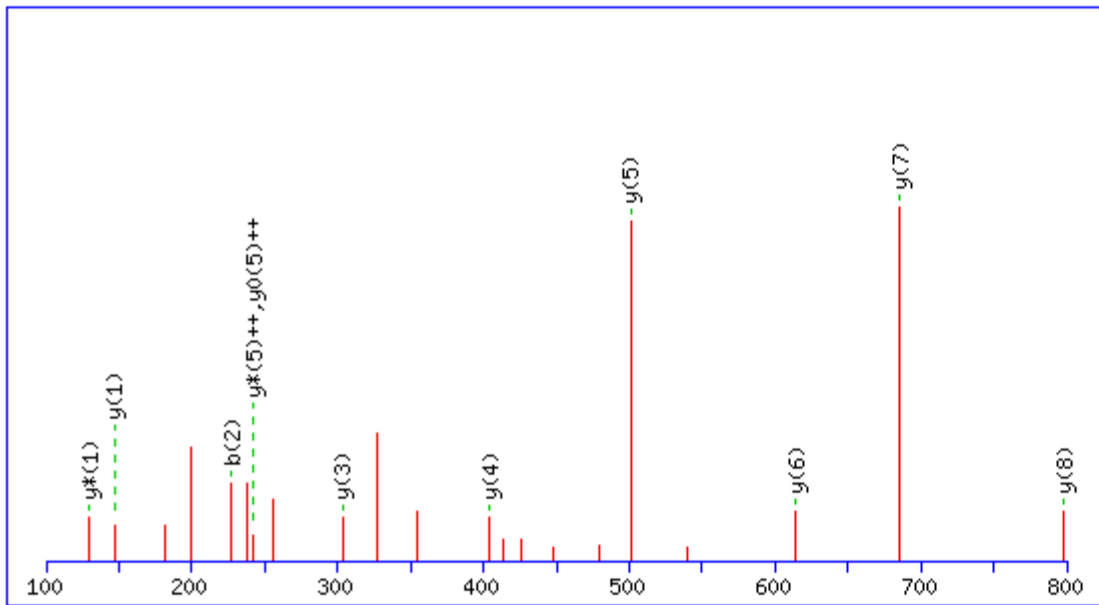

Monoisotopic mass of neutral peptide  $M_r(\text{calc})$ : 910.585144

Fixed modifications: Carbamidomethyl (C) (apply to specified residues or termini only)

Ions Score: 47 Expect:  $2e-005$

Matches : 11/64 fragment ions using 22 most intense peaks [\(help\)](#)

| # | b                 | b <sup>++</sup> | b <sup>0</sup> | b <sup>0++</sup> | Seq. | y                 | y <sup>++</sup> | y <sup>*</sup>    | y <sup>+++</sup>  | y <sup>0</sup> | y <sup>0++</sup>  | # |
|---|-------------------|-----------------|----------------|------------------|------|-------------------|-----------------|-------------------|-------------------|----------------|-------------------|---|
| 1 | 114.091340        | 57.549308       |                |                  | I    |                   |                 |                   |                   |                |                   | 9 |
| 2 | <b>227.175404</b> | 114.091340      |                |                  | I    | <b>798.508367</b> | 399.757822      | 781.481818        | 391.244547        | 780.497802     | 390.752539        | 8 |
| 3 | 298.212518        | 149.609897      |                |                  | A    | <b>685.424303</b> | 343.215790      | 668.397754        | 334.702515        | 667.413738     | 334.210507        | 7 |
| 4 | 411.296582        | 206.151929      |                |                  | I    | <b>614.387189</b> | 307.697233      | 597.360640        | 299.183958        | 596.376624     | 298.691950        | 6 |
| 5 | 508.349346        | 254.678311      |                |                  | P    | <b>501.303125</b> | 251.155201      | 484.276576        | <b>242.641926</b> | 483.292560     | <b>242.149918</b> | 5 |
| 6 | 609.397025        | 305.202151      | 591.386460     | 296.196868       | T    | <b>404.250361</b> | 202.628818      | 387.223812        | 194.115544        | 386.239796     | 193.623536        | 4 |
| 7 | 666.418489        | 333.712883      | 648.407924     | 324.707600       | G    | <b>303.202682</b> | 152.104979      | 286.176133        | 143.591704        |                |                   | 3 |
| 8 | 765.486903        | 383.247090      | 747.476338     | 374.241807       | V    | 246.181218        | 123.594247      | 229.154669        | 115.080972        |                |                   | 2 |
| 9 |                   |                 |                |                  | K    | <b>147.112804</b> | 74.060040       | <b>130.086255</b> | 65.546765         |                |                   | 1 |

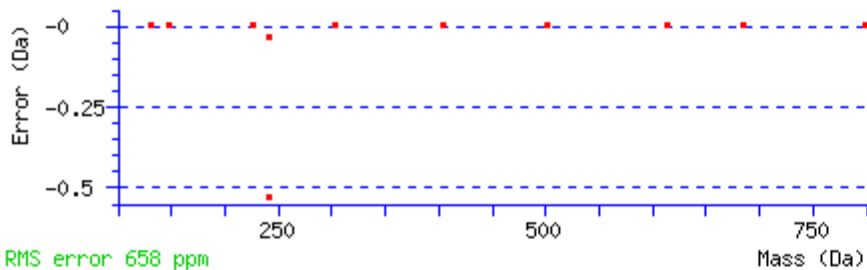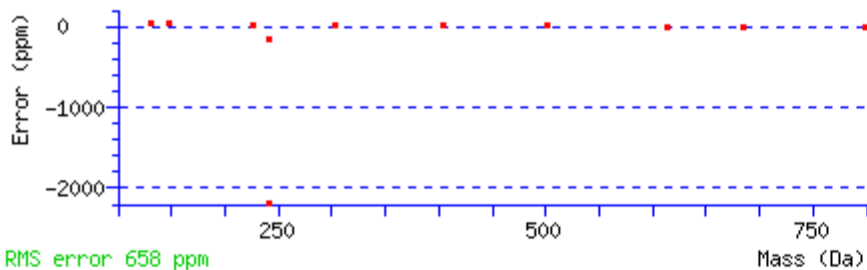

NCBI BLAST search of **IIAIPGTVK**

(Parameters: blastp, nr protein database, expect=20000, no filter, PAM30)

Other BLAST [web gateways](#)

## All matches to this query

| Score | $M_r(\text{calc})$ : | Delta    | Sequence                  |
|-------|----------------------|----------|---------------------------|
| 47.1  | 910.585144           | 0.001584 | <a href="#">IIAIPGTVK</a> |
| 17.6  | 910.585129           | 0.001599 | <a href="#">LPLAQILK</a>  |
| 14.6  | 910.585129           | 0.001599 | <a href="#">LLQPALLK</a>  |
| 8.5   | 910.585129           | 0.001599 | <a href="#">IKIAPPK</a>   |
| 7.5   | 910.585144           | 0.001584 | <a href="#">LLVVDPPK</a>  |
| 6.7   | 910.585129           | 0.001599 | <a href="#">IISQLPLK</a>  |
| 5.3   | 910.585144           | 0.001584 | <a href="#">IKLVPPTK</a>  |
| 5.1   | 910.585129           | 0.001599 | <a href="#">LKLPPLSK</a>  |
| 5.0   | 910.585144           | 0.001584 | <a href="#">IKLVPPTK</a>  |
| 5.0   | 910.585129           | 0.001599 | <a href="#">LKLPPLSK</a>  |

# **MATRIX** SCIENCE Mascot Search Results

## Peptide View

MS/MS Fragmentation of **GGVADALLYR**

Found in **CX7A2\_HUMAN**, Cytochrome c oxidase subunit 7A2, mitochondrial OS=Homo sapiens GN=COX7A2 PE=1 SV=1

Match to Query 12297: 1033.561228 from(517.787890,2+) rtinseconds(2606) index(14980)

Title: Locus:1.1.1.2505.8

Data file 2011-11-12 - TFD - EP 6-8.mgf

Click mouse within plot area to zoom in by factor of two about that point

Or, Plot from  to  Da

Label all possible matches  Label matches used for scoring

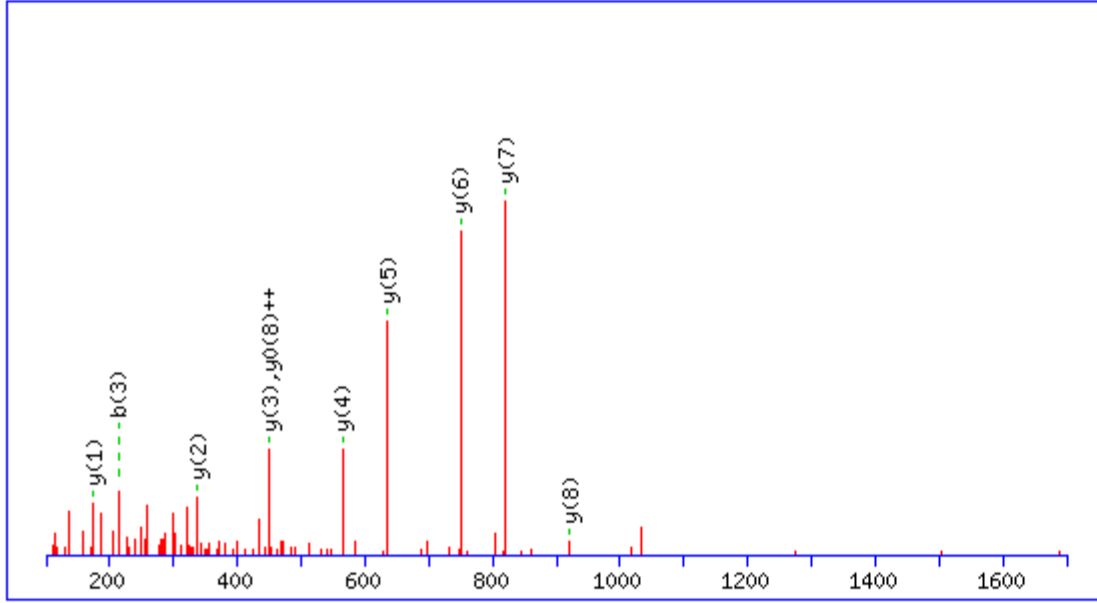

Monoisotopic mass of neutral peptide Mr(calc): 1033.555634

Fixed modifications: Propionamide (C) (apply to specified residues or termini only)

Ions Score: 87 Expect: 2.4e-008

Matches : 10/72 fragment ions using 10 most intense peaks [\(help\)](#)

| #  | b                 | b <sup>++</sup> | b <sup>0</sup> | b <sup>0++</sup> | Seq.     | y                 | y <sup>++</sup> | y <sup>*</sup> | y <sup>*++</sup> | y <sup>0</sup> | y <sup>0++</sup>  | #  |
|----|-------------------|-----------------|----------------|------------------|----------|-------------------|-----------------|----------------|------------------|----------------|-------------------|----|
| 1  | 58.028740         | 29.518008       |                |                  | <b>G</b> |                   |                 |                |                  |                |                   | 10 |
| 2  | 115.050204        | 58.028740       |                |                  | <b>G</b> | 977.541458        | 489.274367      | 960.514909     | 480.761093       | 959.530893     | 480.269085        | 9  |
| 3  | <b>214.118618</b> | 107.562947      |                |                  | <b>V</b> | <b>920.519994</b> | 460.763635      | 903.493445     | 452.250361       | 902.509429     | <b>451.758353</b> | 8  |
| 4  | 285.155732        | 143.081504      |                |                  | <b>A</b> | <b>821.451580</b> | 411.229428      | 804.425031     | 402.716154       | 803.441015     | 402.224146        | 7  |
| 5  | 400.182675        | 200.594976      | 382.172110     | 191.589693       | <b>D</b> | <b>750.414466</b> | 375.710871      | 733.387917     | 367.197597       | 732.403901     | 366.705589        | 6  |
| 6  | 471.219789        | 236.113533      | 453.209224     | 227.108250       | <b>A</b> | <b>635.387523</b> | 318.197400      | 618.360974     | 309.684125       |                |                   | 5  |
| 7  | 584.303853        | 292.655565      | 566.293288     | 283.650282       | <b>L</b> | <b>564.350409</b> | 282.678843      | 547.323860     | 274.165568       |                |                   | 4  |
| 8  | 697.387917        | 349.197597      | 679.377352     | 340.192314       | <b>L</b> | <b>451.266345</b> | 226.136810      | 434.239796     | 217.623536       |                |                   | 3  |
| 9  | 860.451246        | 430.729261      | 842.440681     | 421.723979       | <b>Y</b> | <b>338.182281</b> | 169.594778      | 321.155732     | 161.081504       |                |                   | 2  |
| 10 |                   |                 |                |                  | <b>R</b> | <b>175.118952</b> | 88.063114       | 158.092403     | 79.549839        |                |                   | 1  |

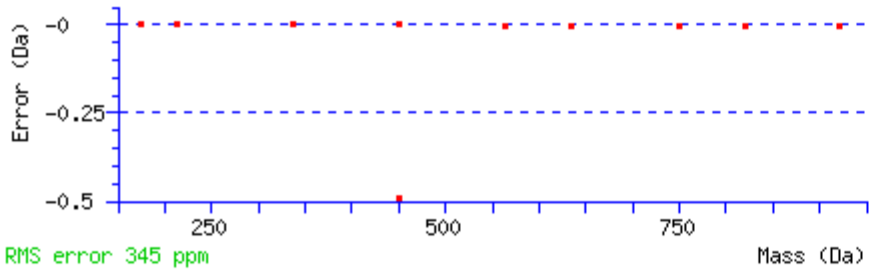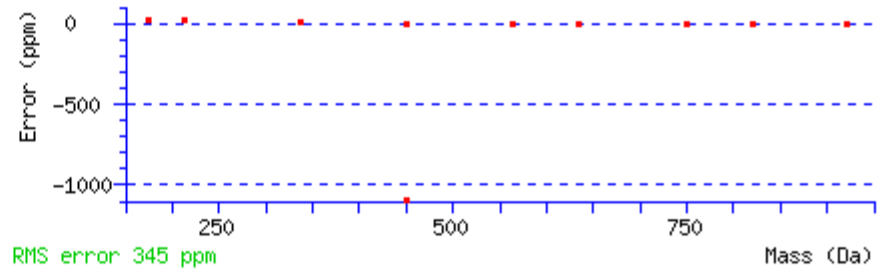

NCBI BLAST search of [GGVADALLYR](#)

(Parameters: blastp, nr protein database, expect=20000, no filter, PAM30)

Other BLAST [web gateways](#)

## All matches to this query

| Score | Mr(calc):   | Delta     | Sequence                     |
|-------|-------------|-----------|------------------------------|
| 86.7  | 1033.555634 | 0.005594  | <a href="#">GGVADALLYR</a>   |
| 18.8  | 1033.566879 | -0.005651 | <a href="#">NVAVPIPHR</a>    |
| 16.7  | 1033.555634 | 0.005594  | <a href="#">GGLKDLFER</a>    |
| 11.8  | 1033.566864 | -0.005636 | <a href="#">NVVYERVR</a>     |
| 9.4   | 1033.555634 | 0.005594  | <a href="#">ALDVQGIYR</a>    |
| 7.6   | 1033.555618 | 0.005610  | <a href="#">ELNQVLYR</a>     |
| 2.1   | 1033.566864 | -0.005636 | <a href="#">AAGPPAGLAPGR</a> |

Mascot: <http://www.matrixscience.com/>

# MASCOT SEARCH RESULTS

## Peptide View

MS/MS Fragmentation of **LTSDSTVYDYAGK**

Found in **COX7R\_HUMAN**, Cytochrome c oxidase subunit 7A-related protein, mitochondrial OS=Homo sapiens GN=COX7A2L PE=1 SV=2

Match to Query 37626: 1418.659468 from(710.337010,2+) rtinseconds(1951) index(16278)

Title: Locus:1.1.1.2074.47

Data file 2011-11-12 - TFD - EP 6-7.mgf

Click mouse within plot area to zoom in by factor of two about that point

Or, Plot from  to  Da

Label all possible matches  Label matches used for scoring

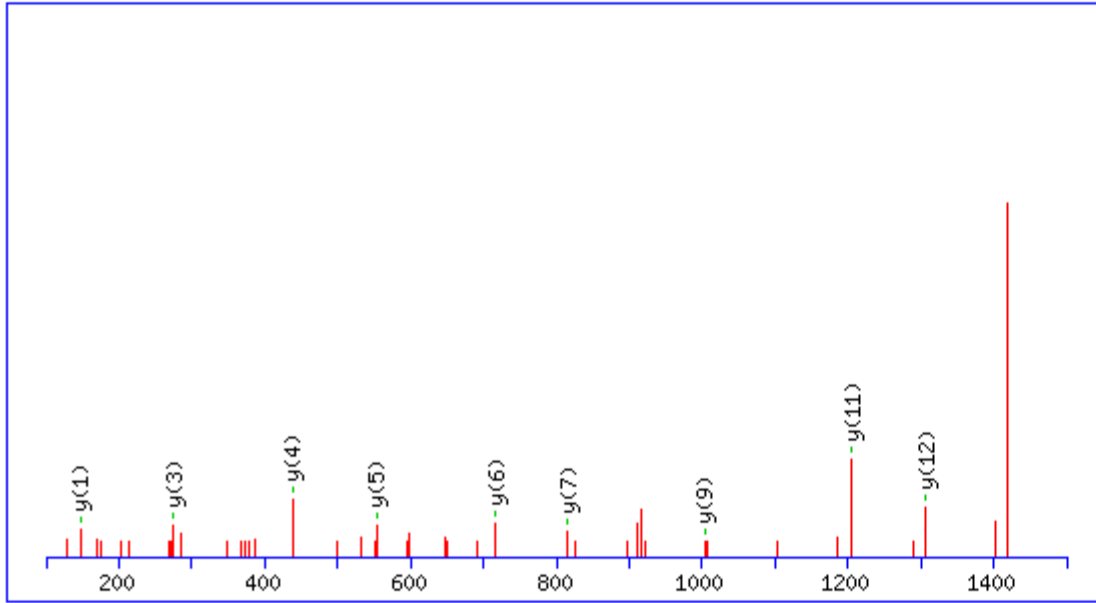

Monoisotopic mass of neutral peptide Mr(calc): 1418.656540

Fixed modifications: Propionamide (C) (apply to specified residues or termini only)

Ions Score: 82 Expect: 6.2e-008

Matches: 9/110 fragment ions using 13 most intense peaks ([help](#))

| #  | b           | b <sup>++</sup> | b <sup>0</sup> | b <sup>0++</sup> | Seq. | y                  | y <sup>++</sup> | y <sup>*</sup> | y <sup>+++</sup> | y <sup>0</sup> | y <sup>0++</sup> | #  |
|----|-------------|-----------------|----------------|------------------|------|--------------------|-----------------|----------------|------------------|----------------|------------------|----|
| 1  | 114.091340  | 57.549308       |                |                  | L    |                    |                 |                |                  |                |                  | 13 |
| 2  | 215.139019  | 108.073147      | 197.128454     | 99.067865        | T    | <b>1306.579754</b> | 653.793515      | 1289.553205    | 645.280241       | 1288.569189    | 644.788233       | 12 |
| 3  | 302.171047  | 151.589161      | 284.160482     | 142.583879       | S    | <b>1205.532075</b> | 603.269676      | 1188.505526    | 594.756401       | 1187.521510    | 594.264393       | 11 |
| 4  | 417.197990  | 209.102633      | 399.187425     | 200.097351       | D    | 1118.500047        | 559.753662      | 1101.473498    | 551.240387       | 1100.489482    | 550.748379       | 10 |
| 5  | 504.230018  | 252.618647      | 486.219453     | 243.613365       | S    | <b>1003.473104</b> | 502.240190      | 986.446555     | 493.726915       | 985.462539     | 493.234907       | 9  |
| 6  | 605.277697  | 303.142487      | 587.267132     | 294.137204       | T    | 916.441076         | 458.724176      | 899.414527     | 450.210901       | 898.430511     | 449.718893       | 8  |
| 7  | 704.346111  | 352.676694      | 686.335546     | 343.671411       | V    | <b>815.393397</b>  | 408.200336      | 798.366848     | 399.687062       | 797.382832     | 399.195054       | 7  |
| 8  | 867.409440  | 434.208358      | 849.398875     | 425.203076       | Y    | <b>716.324983</b>  | 358.666130      | 699.298434     | 350.152855       | 698.314418     | 349.660847       | 6  |
| 9  | 982.436383  | 491.721830      | 964.425818     | 482.716547       | D    | <b>553.261654</b>  | 277.134465      | 536.235105     | 268.621190       | 535.251089     | 268.129182       | 5  |
| 10 | 1145.499712 | 573.253494      | 1127.489147    | 564.248212       | Y    | <b>438.234711</b>  | 219.620993      | 421.208162     | 211.107719       |                |                  | 4  |
| 11 | 1216.536826 | 608.772051      | 1198.526261    | 599.766769       | A    | <b>275.171382</b>  | 138.089329      | 258.144833     | 129.576054       |                |                  | 3  |
| 12 | 1273.558290 | 637.282783      | 1255.547725    | 628.277500       | G    | 204.134268         | 102.570772      | 187.107719     | 94.057497        |                |                  | 2  |
| 13 |             |                 |                |                  | K    | <b>147.112804</b>  | 74.060040       | 130.086255     | 65.546765        |                |                  | 1  |

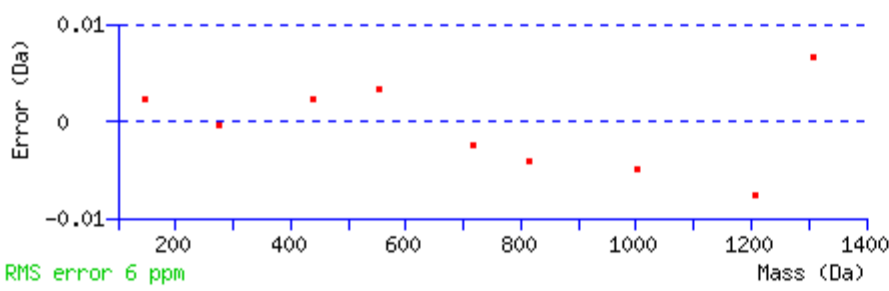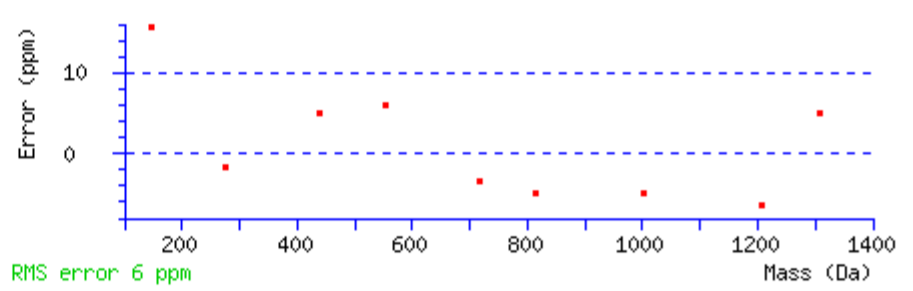

NCBI BLAST search of **LTSDSTVYDYAGK**

(Parameters: blastp, nr protein database, expect=20000, no filter, PAM30)

Other BLAST [web gateways](#)

All matches to this query

| Score | Mr(calc):   | Delta     | Sequence                      |
|-------|-------------|-----------|-------------------------------|
| 82.1  | 1418.656540 | 0.002928  | <a href="#">LTSDSTVYDYAGK</a> |
| 12.5  | 1418.671112 | -0.011644 | <a href="#">DVENMGKEELQK</a>  |
| 7.8   | 1418.657394 | 0.002074  | <a href="#">FYTDLNMIQK</a>    |
| 7.8   | 1418.657394 | 0.002074  | <a href="#">FYTDLNMIQK</a>    |
| 7.1   | 1418.671097 | -0.011629 | <a href="#">RIEEMEDQLQK</a>   |
| 2.5   | 1418.664612 | -0.005144 | <a href="#">NMAMTGGPDPRLK</a> |
| 0.3   | 1418.664581 | -0.005113 | <a href="#">LECVENCRSK</a>    |

Mascot: <http://www.matrixscience.com/>

**Peptide View**

MS/MS Fragmentation of **NLPFSVENK**

Found in **COX7C\_HUMAN**, Cytochrome c oxidase subunit 7C, mitochondrial OS=Homo sapiens GN=COX7C PE=1 SV=1

Match to Query 10667: 1046.543848 from(524.279200,2+) rtinseconds(2357) index(9746)

Title: Locus:1.1.1.2547.4

Data file 2011-11-10 - TFD - EP 3-8.mgf

Click mouse within plot area to zoom in by factor of two about that point

Or, Plot from  to  Da

Label all possible matches  Label matches used for scoring

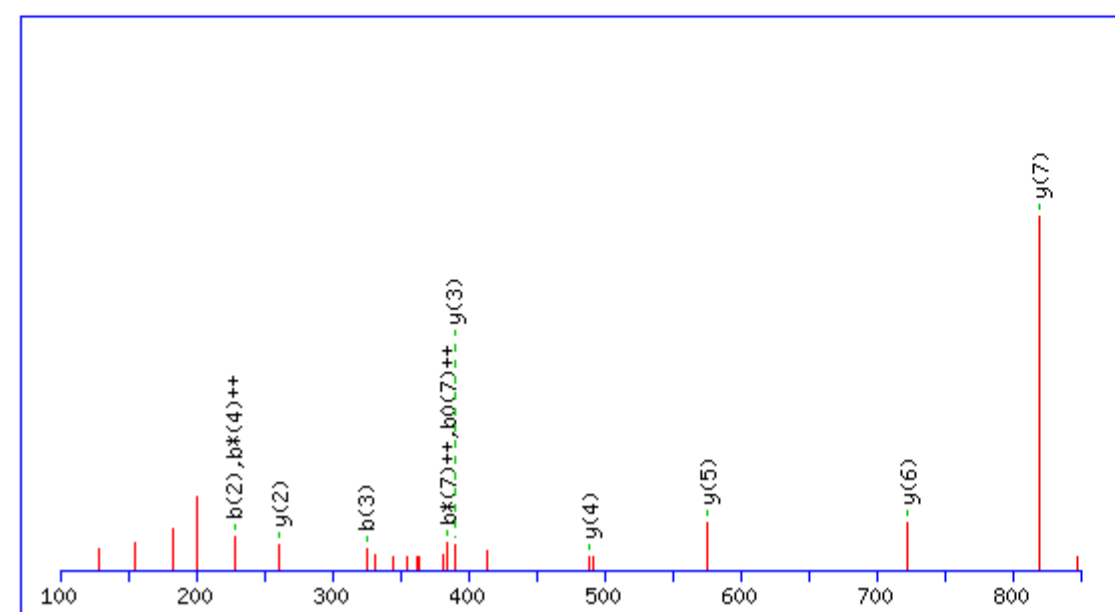

Monoisotopic mass of neutral peptide Mr(calc): 1046.539642

Fixed modifications: Propionamide (C) (apply to specified residues or termini only)

Ions Score: 46 Expect: 0.00084

Matches : 11/84 fragment ions using 14 most intense peaks [\(help\)](#)

| # | b                 | b <sup>++</sup> | b*         | b <sup>+++</sup>  | b <sup>0</sup> | b <sup>0++</sup>  | Seq. | y                 | y <sup>++</sup> | y*         | y <sup>+++</sup> | y <sup>0</sup> | y <sup>0++</sup> | # |
|---|-------------------|-----------------|------------|-------------------|----------------|-------------------|------|-------------------|-----------------|------------|------------------|----------------|------------------|---|
| 1 | 115.050203        | 58.028740       | 98.023654  | 49.515465         |                |                   | N    |                   |                 |            |                  |                |                  | 9 |
| 2 | <b>228.134267</b> | 114.570771      | 211.107718 | 106.057497        |                |                   | L    | 933.504008        | 467.255642      | 916.477459 | 458.742368       | 915.493443     | 458.250360       | 8 |
| 3 | <b>325.187031</b> | 163.097153      | 308.160482 | 154.583879        |                |                   | P    | <b>820.419944</b> | 410.713610      | 803.393395 | 402.200336       | 802.409379     | 401.708328       | 7 |
| 4 | 472.255445        | 236.631360      | 455.228896 | <b>228.118086</b> |                |                   | F    | <b>723.367180</b> | 362.187228      | 706.340631 | 353.673954       | 705.356615     | 353.181946       | 6 |
| 5 | 559.287473        | 280.147375      | 542.260924 | 271.634100        | 541.276908     | 271.142092        | S    | <b>576.298766</b> | 288.653021      | 559.272217 | 280.139747       | 558.288201     | 279.647739       | 5 |
| 6 | 658.355887        | 329.681581      | 641.329338 | 321.168307        | 640.345322     | 320.676299        | V    | <b>489.266738</b> | 245.137007      | 472.240189 | 236.623733       | 471.256173     | 236.131725       | 4 |
| 7 | 787.398480        | 394.202878      | 770.371931 | <b>385.689603</b> | 769.387915     | <b>385.197595</b> | E    | <b>390.198324</b> | 195.602800      | 373.171775 | 187.089526       | 372.187759     | 186.597518       | 3 |
| 8 | 901.441407        | 451.224341      | 884.414858 | 442.711067        | 883.430842     | 442.219059        | N    | <b>261.155731</b> | 131.081504      | 244.129182 | 122.568229       |                |                  | 2 |
| 9 |                   |                 |            |                   |                |                   | K    | 147.112804        | 74.060040       | 130.086255 | 65.546766        |                |                  | 1 |

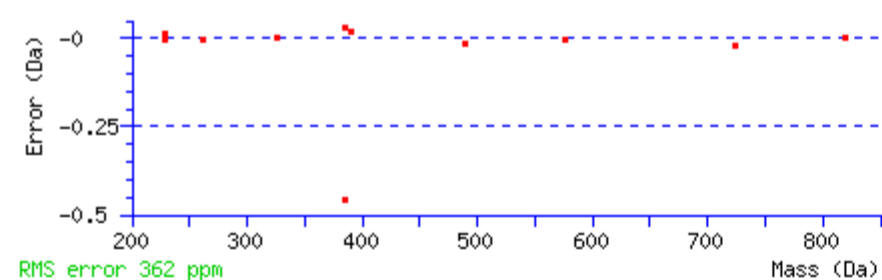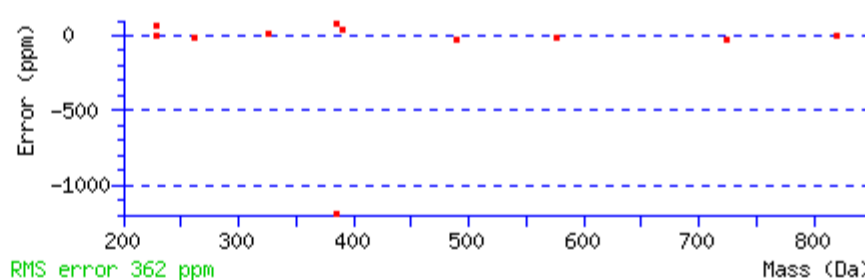

NCBI BLAST search of **NLPFSVENK**

(Parameters: blastp, nr protein database, expect=20000, no filter, PAM30)

Other BLAST [web gateways](#)

**All matches to this query**

| Score | Mr(calc):   | Delta     | Sequence                    |
|-------|-------------|-----------|-----------------------------|
| 46.4  | 1046.539642 | 0.004206  | <a href="#">NLPFSVENK</a>   |
| 2.9   | 1046.550888 | -0.007040 | <a href="#">PLNVSFTNR</a>   |
| 2.5   | 1046.550888 | -0.007040 | <a href="#">GVPYSQRPK</a>   |
| 1.7   | 1046.535629 | 0.008219  | <a href="#">TPGGSQKASSK</a> |
| 0.8   | 1046.554230 | -0.010382 | <a href="#">RLQELCSK</a>    |
| 0.5   | 1046.554245 | -0.010397 | <a href="#">KVAQMVEAR</a>   |
| 0.5   | 1046.554245 | -0.010397 | <a href="#">KVPSLCSAR</a>   |
| 0.5   | 1046.554245 | -0.010397 | <a href="#">QVIRTCEK</a>    |
| 0.3   | 1046.550888 | -0.007040 | <a href="#">INTLGWTSR</a>   |

# MASCOT SEARCH RESULTS

## Peptide View

MS/MS Fragmentation of **ALLVPLVYTIK**

Found in **CY1\_HUMAN**, Cytochrome c1, heme protein, mitochondrial OS=Homo sapiens GN=CYC1 PE=1 SV=3

Match to Query 25894: 1228.772348 from(615.393450,2+) rtinseconds(3524) index(51236)

Title: Locus:1.1.1.1780.16

Data file 2012-01-27 - TFD - Epitel - IEC - 10ul - 3.mgf

Click mouse within plot area to zoom in by factor of two about that point

Or, Plot from  to  Da

Label all possible matches  Label matches used for scoring

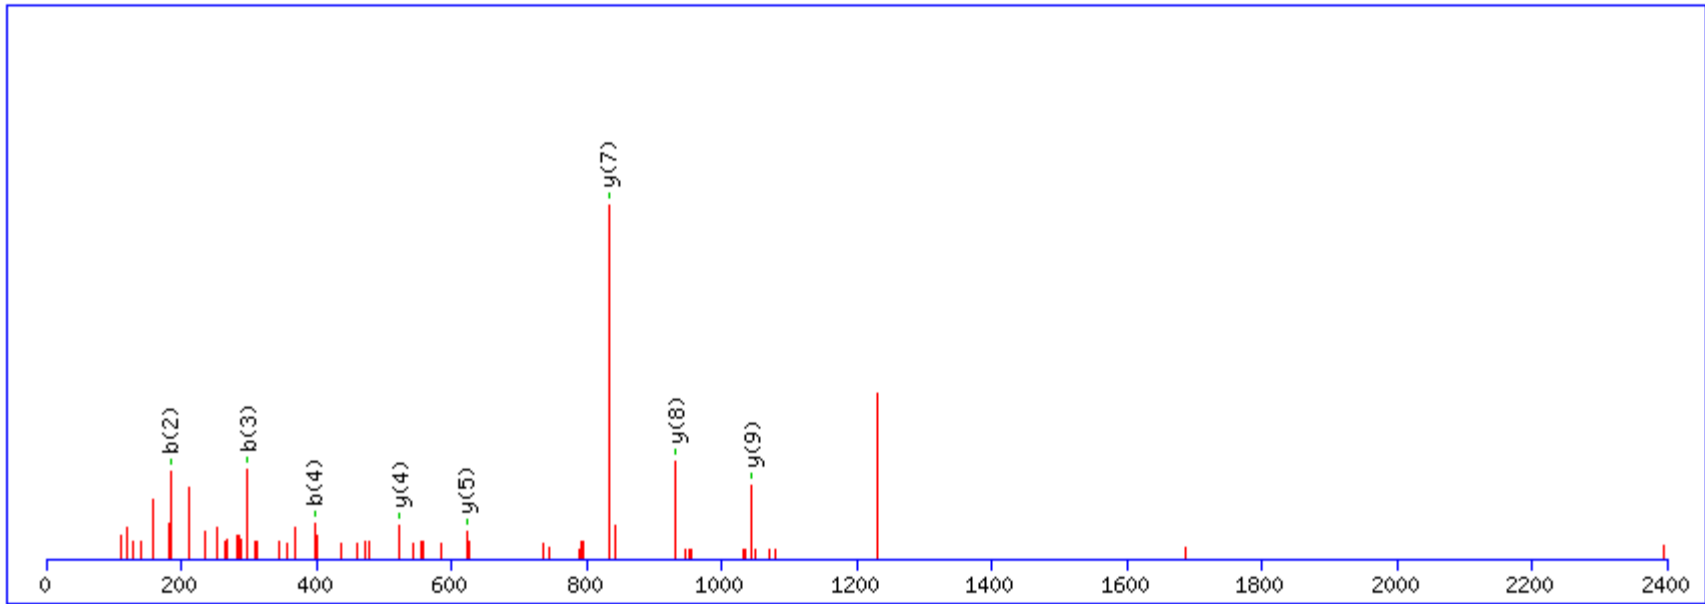

Monoisotopic mass of neutral peptide Mr(calc): 1228.779480

Fixed modifications: Carbamidomethyl (C) (apply to specified residues or termini only)

Ions Score: 39 Expect: 0.00013

Matches : 8/80 fragment ions using 10 most intense peaks [\(help\)](#)

| #  | b           | b <sup>++</sup> | b <sup>0</sup> | b <sup>0++</sup> | Seq. | y           | y <sup>++</sup> | y <sup>*</sup> | y <sup>*++</sup> | y <sup>0</sup> | y <sup>0++</sup> | #  |
|----|-------------|-----------------|----------------|------------------|------|-------------|-----------------|----------------|------------------|----------------|------------------|----|
| 1  | 72.044390   | 36.525833       |                |                  | A    |             |                 |                |                  |                |                  | 11 |
| 2  | 185.128454  | 93.067865       |                |                  | L    | 1158.749660 | 579.878468      | 1141.723111    | 571.365194       | 1140.739095    | 570.873185       | 10 |
| 3  | 298.212518  | 149.609897      |                |                  | L    | 1045.665596 | 523.336436      | 1028.639047    | 514.823162       | 1027.655031    | 514.331154       | 9  |
| 4  | 397.280932  | 199.144104      |                |                  | V    | 932.581532  | 466.794404      | 915.554983     | 458.281129       | 914.570967     | 457.789121       | 8  |
| 5  | 494.333696  | 247.670486      |                |                  | P    | 833.513118  | 417.260197      | 816.486569     | 408.746922       | 815.502553     | 408.254914       | 7  |
| 6  | 607.417760  | 304.212518      |                |                  | L    | 736.460354  | 368.733815      | 719.433805     | 360.220540       | 718.449789     | 359.728532       | 6  |
| 7  | 706.486174  | 353.746725      |                |                  | V    | 623.376290  | 312.191783      | 606.349741     | 303.678508       | 605.365725     | 303.186500       | 5  |
| 8  | 869.549503  | 435.278390      |                |                  | Y    | 524.307876  | 262.657576      | 507.281327     | 254.144301       | 506.297311     | 253.652293       | 4  |
| 9  | 970.597182  | 485.802229      | 952.586617     | 476.796946       | T    | 361.244547  | 181.125911      | 344.217998     | 172.612637       | 343.233982     | 172.120629       | 3  |
| 10 | 1083.681246 | 542.344261      | 1065.670681    | 533.338978       | I    | 260.196868  | 130.602072      | 243.170319     | 122.088797       |                |                  | 2  |
| 11 |             |                 |                |                  | K    | 147.112804  | 74.060040       | 130.086255     | 65.546765        |                |                  | 1  |

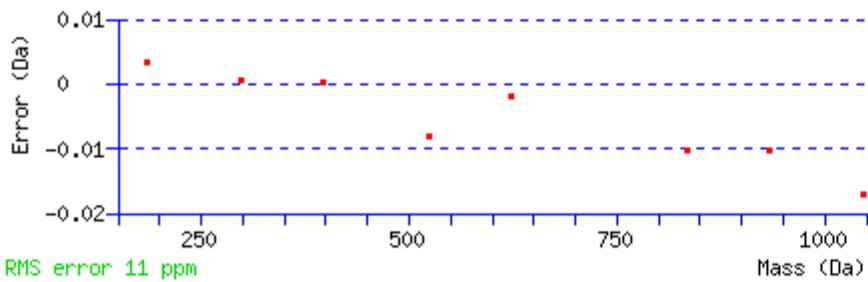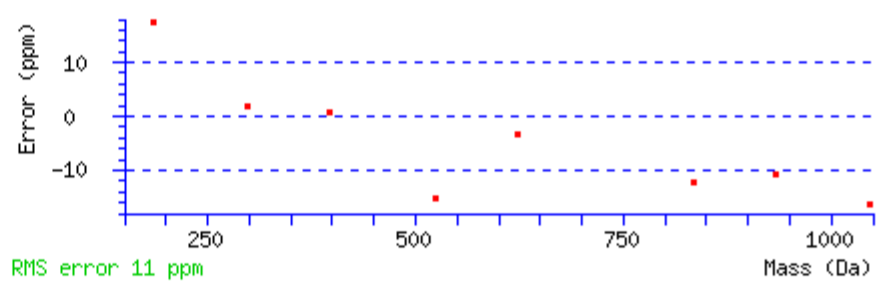

NCBI BLAST search of [ALLVPLVYTIK](#)

(Parameters: blastp, nr protein database, expect=20000, no filter, PAM30)

Other BLAST [web gateways](#)

## All matches to this query

| Score | Mr(calc):   | Delta     | Sequence                    |
|-------|-------------|-----------|-----------------------------|
| 38.9  | 1228.779480 | -0.007132 | <a href="#">ALLVPLVYTIK</a> |

Mascot: <http://www.matrixscience.com/>



# **MATRIX** SCIENCE Mascot Search Results

## Peptide View

MS/MS Fragmentation of **LFPVVSR**

Found in **CP343\_HUMAN**, Cytochrome P450 3A43 OS=Homo sapiens GN=CYP3A43 PE=1 SV=1

Match to Query 3012: 832.484908 from(417.249730,2+) rtinseconds(2315) index(28526)

Title: Locus:1.1.1.2224.7

Data file 2011-11-10 - TFD - EP 3-4.mgf

Click mouse within plot area to zoom in by factor of two about that point

Or, Plot from  to  Da

Label all possible matches  Label matches used for scoring

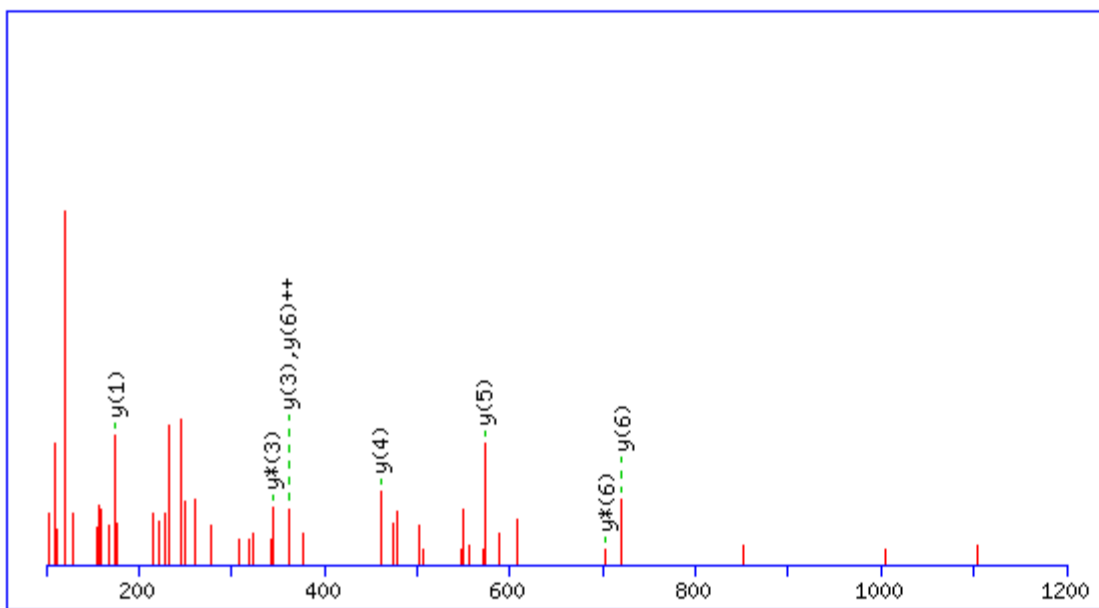

Monoisotopic mass of neutral peptide Mr(calc): 832.480698

Fixed modifications: Propionamide (C) (apply to specified residues or termini only)

Variable modifications:

P3 : Oxidation (P)

Ions Score: 30 Expect: 0.0066

Matches : 8/48 fragment ions using 13 most intense peaks ([help](#))

| # | b          | b <sup>++</sup> | b <sup>0</sup> | b <sup>0++</sup> | Seq. | y          | y <sup>++</sup> | y <sup>*</sup> | y <sup>*++</sup> | y <sup>0</sup> | y <sup>0++</sup> | # |
|---|------------|-----------------|----------------|------------------|------|------------|-----------------|----------------|------------------|----------------|------------------|---|
| 1 | 114.091340 | 57.549308       |                |                  | L    |            |                 |                |                  |                |                  | 7 |
| 2 | 261.159754 | 131.083515      |                |                  | F    | 720.403901 | 360.705589      | 703.377352     | 352.192314       | 702.393336     | 351.700306       | 6 |
| 3 | 374.207433 | 187.607354      |                |                  | P    | 573.335487 | 287.171382      | 556.308938     | 278.658107       | 555.324922     | 278.166099       | 5 |
| 4 | 473.275847 | 237.141561      |                |                  | V    | 460.287808 | 230.647542      | 443.261259     | 222.134267       | 442.277243     | 221.642259       | 4 |
| 5 | 572.344261 | 286.675769      |                |                  | V    | 361.219394 | 181.113335      | 344.192845     | 172.600060       | 343.208829     | 172.108052       | 3 |
| 6 | 659.376289 | 330.191783      | 641.365724     | 321.186500       | S    | 262.150980 | 131.579128      | 245.124431     | 123.065853       | 244.140415     | 122.573845       | 2 |
| 7 |            |                 |                |                  | R    | 175.118952 | 88.063114       | 158.092403     | 79.549839        |                |                  | 1 |

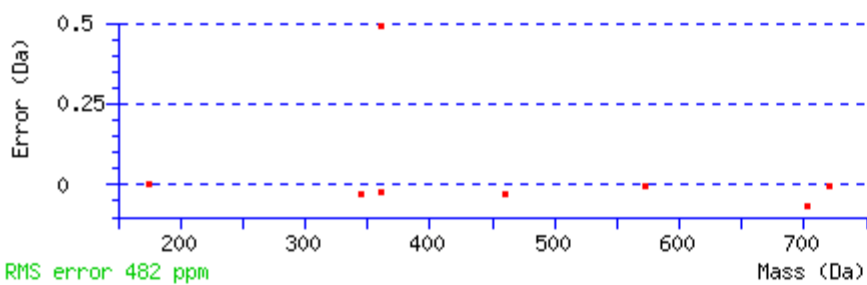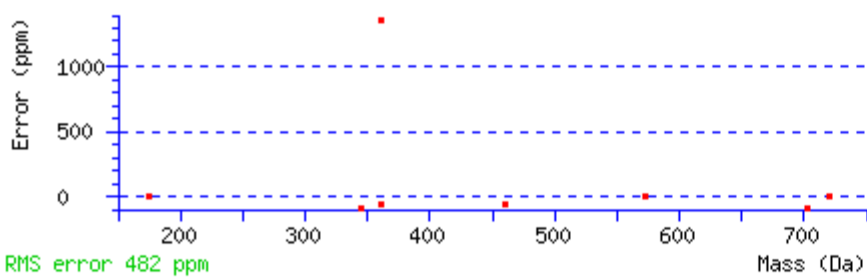

NCBI BLAST search of [LFPVVSR](#)

(Parameters: blastp, nr protein database, expect=20000, no filter, PAM30)

Other BLAST [web gateways](#)

## All matches to this query

| Score | Mr(calc):  | Delta     | Sequence                |
|-------|------------|-----------|-------------------------|
| 30.4  | 832.480698 | 0.004210  | <a href="#">LFPVVSR</a> |
| 15.3  | 832.480682 | 0.004226  | <a href="#">FLLVGER</a> |
| 15.3  | 832.480698 | 0.004210  | <a href="#">FPLVSVR</a> |
| 14.6  | 832.480682 | 0.004226  | <a href="#">LEFVGR</a>  |
| 11.3  | 832.491898 | -0.006990 | <a href="#">LLREFR</a>  |
| 7.8   | 832.480682 | 0.004226  | <a href="#">IDLGIFR</a> |
| 7.0   | 832.480682 | 0.004226  | <a href="#">LLSTFPR</a> |
| 5.6   | 832.491898 | -0.006990 | <a href="#">LFELRR</a>  |
| 5.6   | 832.491898 | -0.006990 | <a href="#">LFERLR</a>  |
| 5.3   | 832.484039 | 0.000869  | <a href="#">CAKTIVK</a> |

# MASCOT SCIENCE Mascot Search Results

## Peptide View

MS/MS Fragmentation of **LWLLDDSK**

Found in **NCK1\_HUMAN**, Cytoplasmic protein NCK1 OS=Homo sapiens GN=NCK1 PE=1 SV=1

Match to Query 15053: 988.529788 from(495.272170,2+) rtinseconds(3085) index(43073)

Title: Locus:1.1.1.2515.4

Data file 2011-11-10 - TFD - EP 3-4.mgf

Click mouse within plot area to zoom in by factor of two about that point

Or, Plot from  to  Da

Label all possible matches  Label matches used for scoring

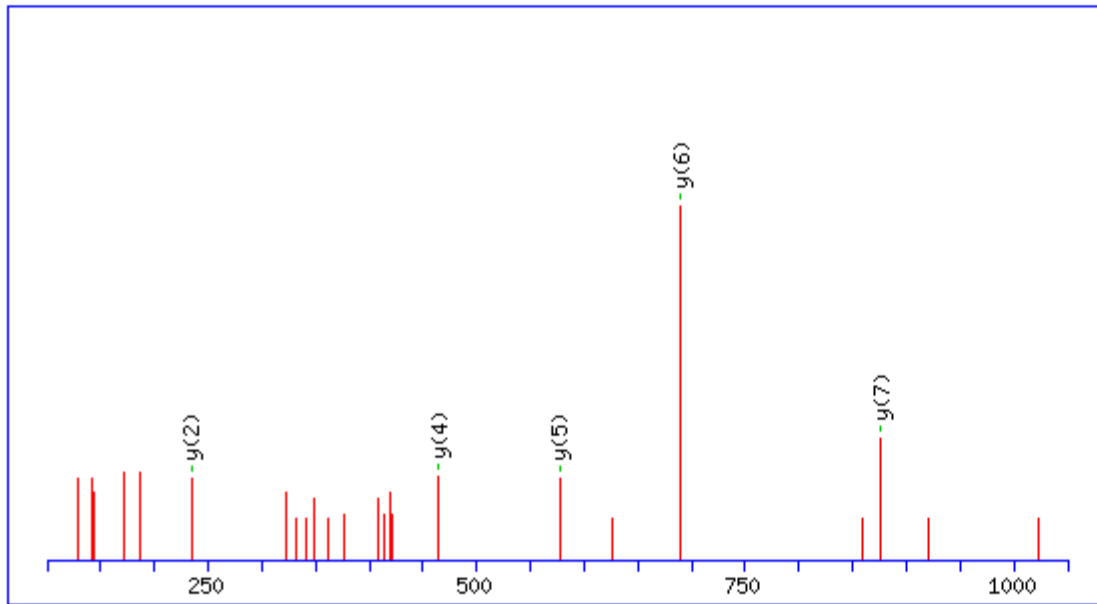

Monoisotopic mass of neutral peptide Mr(calc): 988.522934

Fixed modifications: Propionamide (C) (apply to specified residues or termini only)

Ions Score: 41 Expect: 0.0025

Matches : 5/60 fragment ions using 7 most intense peaks ([help](#))

| # | b          | b <sup>++</sup> | b <sup>0</sup> | b <sup>0++</sup> | Seq. | y          | y <sup>++</sup> | y <sup>*</sup> | y <sup>*++</sup> | y <sup>0</sup> | y <sup>0++</sup> | # |
|---|------------|-----------------|----------------|------------------|------|------------|-----------------|----------------|------------------|----------------|------------------|---|
| 1 | 114.091340 | 57.549308       |                |                  | L    |            |                 |                |                  |                |                  | 8 |
| 2 | 300.170653 | 150.588965      |                |                  | W    | 876.446159 | 438.726718      | 859.419610     | 430.213443       | 858.435594     | 429.721435       | 7 |
| 3 | 413.254717 | 207.130997      |                |                  | L    | 690.366846 | 345.687061      | 673.340297     | 337.173786       | 672.356281     | 336.681778       | 6 |
| 4 | 526.338781 | 263.673029      |                |                  | L    | 577.282782 | 289.145029      | 560.256233     | 280.631755       | 559.272217     | 280.139747       | 5 |
| 5 | 641.365724 | 321.186500      | 623.355159     | 312.181218       | D    | 464.198718 | 232.602997      | 447.172169     | 224.089722       | 446.188153     | 223.597714       | 4 |
| 6 | 756.392667 | 378.699972      | 738.382102     | 369.694689       | D    | 349.171775 | 175.089525      | 332.145226     | 166.576251       | 331.161210     | 166.084243       | 3 |
| 7 | 843.424695 | 422.215985      | 825.414130     | 413.210703       | S    | 234.144832 | 117.576054      | 217.118283     | 109.062779       | 216.134267     | 108.570771       | 2 |
| 8 |            |                 |                |                  | K    | 147.112804 | 74.060040       | 130.086255     | 65.546765        |                |                  | 1 |

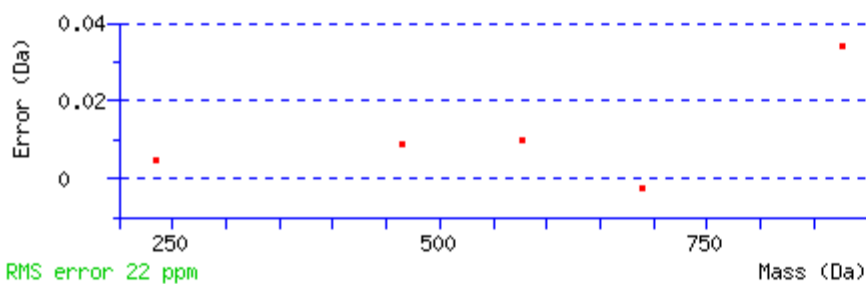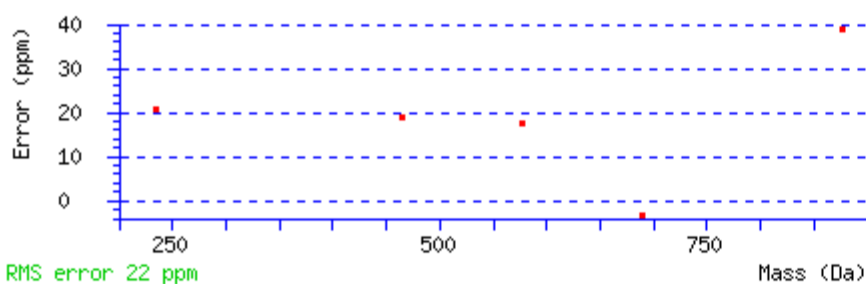

NCBI BLAST search of **LWLLDDSK**

(Parameters: blastp, nr protein database, expect=20000, no filter, PAM30)

Other BLAST [web gateways](#)

All matches to this query

| Score | Mr(calc):  | Delta     | Sequence                   |
|-------|------------|-----------|----------------------------|
| 40.8  | 988.522934 | 0.006854  | <a href="#">LWLLDDSK</a>   |
| 25.5  | 988.520432 | 0.009356  | <a href="#">LWIPWMK</a>    |
| 13.6  | 988.520248 | 0.009540  | <a href="#">LGEPHHRK</a>   |
| 13.0  | 988.520432 | 0.009356  | <a href="#">LWIPWMK</a>    |
| 1.1   | 988.534164 | -0.004376 | <a href="#">QELPLSFR</a>   |
| 0.7   | 988.530151 | -0.000363 | <a href="#">VPSKAAGSTR</a> |

**Peptide View**

MS/MS Fragmentation of **NLGIPITVLGDSK**

Found in **CKAP5\_HUMAN**, Cytoskeleton-associated protein 5 OS=Homo sapiens GN=CKAP5 PE=1 SV=3

Match to Query 42189: 1438.846668 from(720.430610,2+) rtinseconds(3812) index(55536)

Title: Locus:1.1.1.2862.31

Data file 2011-11-10 - TFD - EP 3-1.mgf

Click mouse within plot area to zoom in by factor of two about that point

Or, Plot from  to  Da

Label all possible matches  Label matches used for scoring

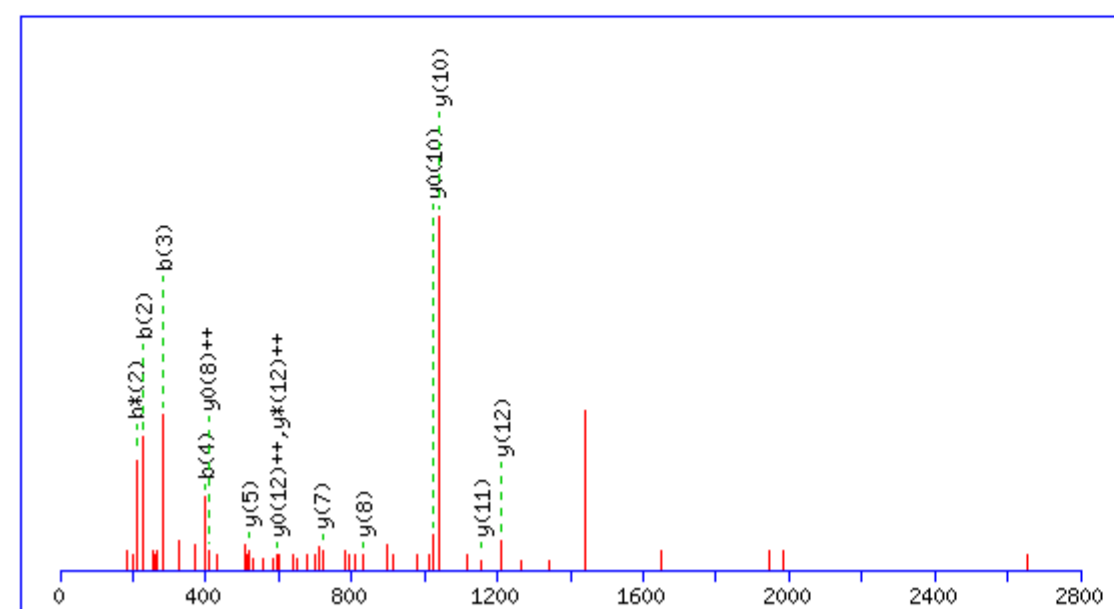

Monoisotopic mass of neutral peptide Mr(calcd): 1438.839523

Fixed modifications: Propionamide (C) (apply to specified residues or termini only)

Ions Score: 36 Expect: 0.00056

Matches : 14/140 fragment ions using 23 most intense peaks [\(help\)](#)

| #  | b                 | b <sup>++</sup> | b <sup>+</sup>    | b <sup>*++</sup> | b <sup>0</sup> | b <sup>0++</sup> | Seq. | y                  | y <sup>++</sup> | y <sup>+</sup> | y <sup>*++</sup>  | y <sup>0</sup>     | y <sup>0++</sup>  | #  |
|----|-------------------|-----------------|-------------------|------------------|----------------|------------------|------|--------------------|-----------------|----------------|-------------------|--------------------|-------------------|----|
| 1  | 115.050203        | 58.028740       | 98.023654         | 49.515465        |                |                  | N    |                    |                 |                |                   |                    |                   | 14 |
| 2  | <b>228.134267</b> | 114.570771      | <b>211.107718</b> | 106.057497       |                |                  | L    | 1325.803880        | 663.405578      | 1308.777331    | 654.892304        | 1307.793315        | 654.400296        | 13 |
| 3  | <b>285.155731</b> | 143.081504      | 268.129182        | 134.568229       |                |                  | G    | <b>1212.719816</b> | 606.863546      | 1195.693267    | <b>598.350272</b> | 1194.709251        | <b>597.858264</b> | 12 |
| 4  | <b>398.239795</b> | 199.623536      | 381.213246        | 191.110261       |                |                  | I    | <b>1155.698352</b> | 578.352814      | 1138.671803    | 569.839540        | 1137.687787        | 569.347532        | 11 |
| 5  | 495.292559        | 248.149918      | 478.266010        | 239.636643       |                |                  | P    | <b>1042.614288</b> | 521.810782      | 1025.587739    | 513.297508        | <b>1024.603723</b> | 512.805500        | 10 |
| 6  | 608.376623        | 304.691950      | 591.350074        | 296.178675       |                |                  | I    | 945.561524         | 473.284400      | 928.534975     | 464.771126        | 927.550959         | 464.279118        | 9  |
| 7  | 721.460687        | 361.233982      | 704.434138        | 352.720707       |                |                  | I    | <b>832.477460</b>  | 416.742368      | 815.450911     | 408.229094        | 814.466895         | <b>407.737086</b> | 8  |
| 8  | 822.508366        | 411.757821      | 805.481817        | 403.244547       | 804.497801     | 402.752539       | T    | <b>719.393396</b>  | 360.200336      | 702.366847     | 351.687062        | 701.382831         | 351.195054        | 7  |
| 9  | 921.576780        | 461.292028      | 904.550231        | 452.778754       | 903.566215     | 452.286746       | V    | 618.345717         | 309.676497      | 601.319168     | 301.163222        | 600.335152         | 300.671214        | 6  |
| 10 | 1034.660844       | 517.834060      | 1017.634295       | 509.320786       | 1016.650279    | 508.828778       | L    | <b>519.277303</b>  | 260.142290      | 502.250754     | 251.629015        | 501.266738         | 251.137007        | 5  |
| 11 | 1091.682308       | 546.344792      | 1074.655759       | 537.831518       | 1073.671743    | 537.339509       | G    | 406.193239         | 203.600258      | 389.166690     | 195.086983        | 388.182674         | 194.594975        | 4  |
| 12 | 1206.709251       | 603.858264      | 1189.682702       | 595.344989       | 1188.698686    | 594.852981       | D    | 349.171775         | 175.089526      | 332.145226     | 166.576251        | 331.161210         | 166.084243        | 3  |
| 13 | 1293.741279       | 647.374278      | 1276.714730       | 638.861003       | 1275.730714    | 638.368995       | S    | 234.144832         | 117.576054      | 217.118283     | 109.062780        | 216.134267         | 108.570772        | 2  |
| 14 |                   |                 |                   |                  |                |                  | K    | 147.112804         | 74.060040       | 130.086255     | 65.546765         |                    |                   | 1  |

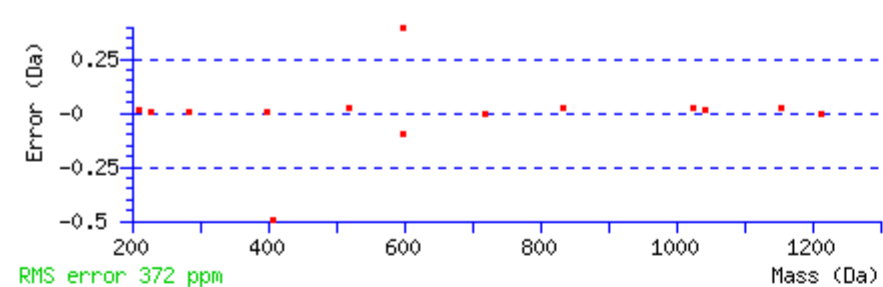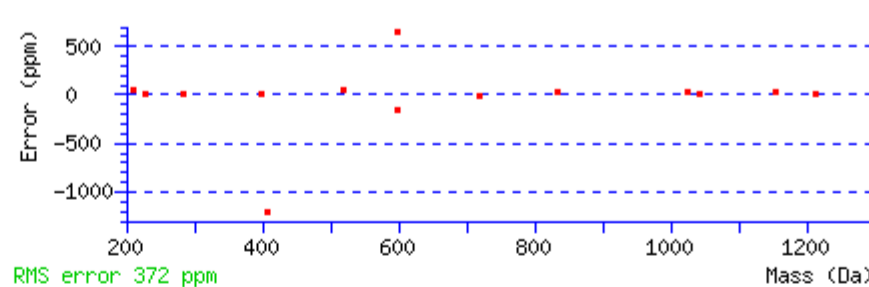

NCBI BLAST search of **NLGIPITVLGDSK**

(Parameters: blastp, nr protein database, expect=20000, no filter, PAM30)

Other BLAST [web gateways](#)

**All matches to this query**

| Score | Mr(calc):   | Delta     | Sequence                        |
|-------|-------------|-----------|---------------------------------|
| 35.9  | 1438.839523 | 0.007145  | <a href="#">NLGIPITVLGDSK</a>   |
| 1.9   | 1438.850754 | -0.004086 | <a href="#">LVS RPKPLSAV PK</a> |
| 1.8   | 1438.839523 | 0.007145  | <a href="#">KPKTISVPDVEVK</a>   |
| 1.4   | 1438.850723 | -0.004055 | <a href="#">ANVIASALAKIPQK</a>  |

# MASCOT SCIENCE Mascot Search Results

## Peptide View

MS/MS Fragmentation of **EAVVAKPK**

Found in **DACT1\_HUMAN**, Dapper homolog 1 OS=Homo sapiens GN=DACT1 PE=2 SV=2

Match to Query 53596: 840.507468 from(421.261010,2+) rtinseconds(1399) index(335965)

Title: Locus:1.1.1.869.2

Data file C:\Program Files (x86)\Matrix Science\Mascot Daemon\mgf3 TFD - Epitel - R2\mascot\_daemon\_merge.mgf

Click mouse within plot area to zoom in by factor of two about that point

Or, Plot from  to  Da

Label all possible matches  Label matches used for scoring

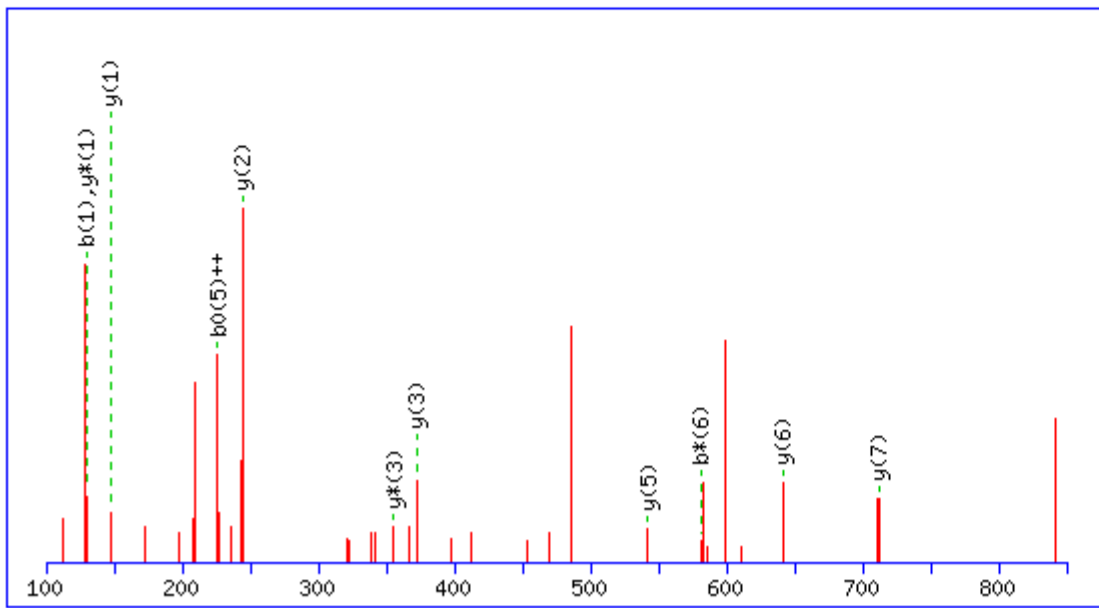

Monoisotopic mass of neutral peptide  $M_r(\text{calc})$ : 840.506882

Fixed modifications: Carbamidomethyl (C) (apply to specified residues or termini only)

Ions Score: 32 Expect: 0.0031

Matches : 11/60 fragment ions using 23 most intense peaks ([help](#))

| # | b          | b <sup>++</sup> | b <sup>*</sup> | b <sup>*++</sup> | b <sup>0</sup> | b <sup>0++</sup> | Seq. | y          | y <sup>++</sup> | y <sup>*</sup> | y <sup>*++</sup> | # |
|---|------------|-----------------|----------------|------------------|----------------|------------------|------|------------|-----------------|----------------|------------------|---|
| 1 | 130.049869 | 65.528572       |                |                  | 112.039304     | 56.523290        | E    |            |                 |                |                  | 8 |
| 2 | 201.086983 | 101.047130      |                |                  | 183.076418     | 92.041847        | A    | 712.471587 | 356.739432      | 695.445038     | 348.226157       | 7 |
| 3 | 300.155397 | 150.581336      |                |                  | 282.144832     | 141.576054       | V    | 641.434473 | 321.220875      | 624.407924     | 312.707600       | 6 |
| 4 | 399.223811 | 200.115544      |                |                  | 381.213246     | 191.110261       | V    | 542.366059 | 271.686668      | 525.339510     | 263.173393       | 5 |
| 5 | 470.260925 | 235.634100      |                |                  | 452.250360     | 226.628818       | A    | 443.297645 | 222.152460      | 426.271096     | 213.639186       | 4 |
| 6 | 598.355888 | 299.681582      | 581.329339     | 291.168308       | 580.345323     | 290.676300       | K    | 372.260531 | 186.633904      | 355.233982     | 178.120629       | 3 |
| 7 | 695.408652 | 348.207964      | 678.382103     | 339.694690       | 677.398087     | 339.202682       | P    | 244.165568 | 122.586422      | 227.139019     | 114.073148       | 2 |
| 8 |            |                 |                |                  |                |                  | K    | 147.112804 | 74.060040       | 130.086255     | 65.546765        | 1 |

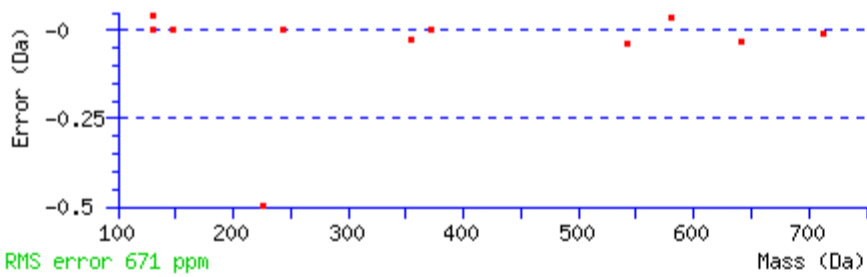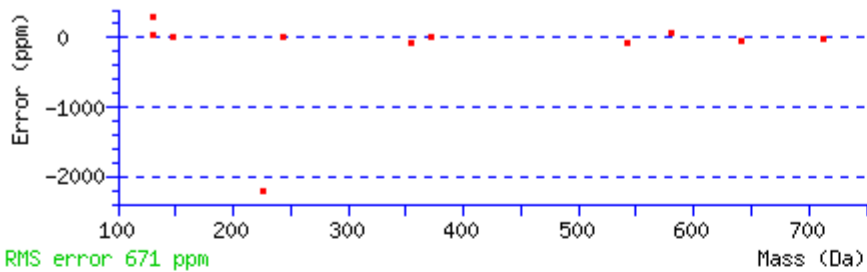

NCBI BLAST search of **EAVVAKPK**

(Parameters: blastp, nr protein database, expect=20000, no filter, PAM30)

Other BLAST [web gateways](#)

## All matches to this query

| Score | $M_r(\text{calc})$ : | Delta    | Sequence                 |
|-------|----------------------|----------|--------------------------|
| 31.8  | 840.506882           | 0.000586 | <a href="#">EAVVAKPK</a> |
| 30.5  | 840.506866           | 0.000602 | <a href="#">KNEPIIK</a>  |
| 21.4  | 840.506882           | 0.000586 | <a href="#">EVAGKIPK</a> |
| 21.1  | 840.506866           | 0.000602 | <a href="#">KNLPLEK</a>  |
| 20.4  | 840.506912           | 0.000556 | <a href="#">VTVLGQPK</a> |
| 15.2  | 840.506897           | 0.000571 | <a href="#">QQVLPLK</a>  |
| 12.3  | 840.506866           | 0.000602 | <a href="#">KENIPLK</a>  |
| 8.6   | 840.506866           | 0.000602 | <a href="#">LKNLEPK</a>  |
| 5.6   | 840.506882           | 0.000586 | <a href="#">LLKGEGPK</a> |
| 5.0   | 840.506897           | 0.000571 | <a href="#">LVGISQPK</a> |

# MASCOT Search Results

## Peptide View

MS/MS Fragmentation of **LFVGGLDWSTTQETLR**

Found in **DAZPI\_HUMAN**, DAZ-associated protein 1 OS=Homo sapiens GN=DAZAP1 PE=1 SV=1

Match to Query 54736: 1821.932468 from(911.973510,2+) rtinseconds(3447) index(50302)

Title: Locus:1.1.1.2800.36

Data file 2011-11-10 - TFD - EP 4-3.mgf

Click mouse within plot area to zoom in by factor of two about that point

Or, Plot from  to  Da

Label all possible matches  Label matches used for scoring

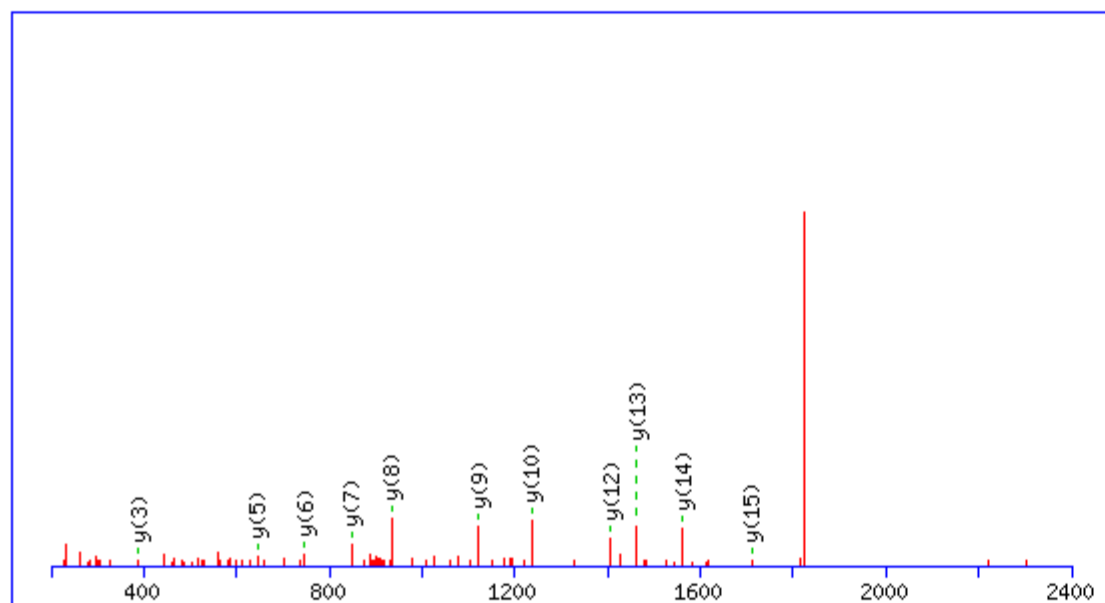

Monoisotopic mass of neutral peptide Mr(calc): 1821.926132

Fixed modifications: Propionamide (C) (apply to specified residues or termini only)

Ions Score: 92 Expect: 6.7e-009

Matches : 11/142 fragment ions using 16 most intense peaks [\(help\)](#)

| #  | b           | b <sup>++</sup> | b <sup>+</sup> | b <sup>+++</sup> | b <sup>0</sup> | b <sup>0++</sup> | Seq. | y           | y <sup>++</sup> | y <sup>+</sup> | y <sup>+++</sup> | y <sup>0</sup> | y <sup>0++</sup> | #  |
|----|-------------|-----------------|----------------|------------------|----------------|------------------|------|-------------|-----------------|----------------|------------------|----------------|------------------|----|
| 1  | 114.091340  | 57.549308       |                |                  |                |                  | L    |             |                 |                |                  |                |                  | 16 |
| 2  | 261.159754  | 131.083515      |                |                  |                |                  | F    | 1709.849328 | 855.428302      | 1692.822779    | 846.915027       | 1691.838763    | 846.423019       | 15 |
| 3  | 360.228168  | 180.617722      |                |                  |                |                  | V    | 1562.780914 | 781.894095      | 1545.754365    | 773.380820       | 1544.770349    | 772.888812       | 14 |
| 4  | 417.249632  | 209.128454      |                |                  |                |                  | G    | 1463.712500 | 732.359888      | 1446.685951    | 723.846613       | 1445.701935    | 723.354605       | 13 |
| 5  | 474.271096  | 237.639186      |                |                  |                |                  | G    | 1406.691036 | 703.849156      | 1389.664487    | 695.335881       | 1388.680471    | 694.843873       | 12 |
| 6  | 587.355160  | 294.181218      |                |                  |                |                  | L    | 1349.669572 | 675.338424      | 1332.643023    | 666.825149       | 1331.659007    | 666.333141       | 11 |
| 7  | 702.382103  | 351.694689      |                |                  | 684.371538     | 342.689407       | D    | 1236.585508 | 618.796392      | 1219.558959    | 610.283118       | 1218.574943    | 609.791109       | 10 |
| 8  | 888.461416  | 444.734346      |                |                  | 870.450851     | 435.729063       | W    | 1121.558565 | 561.282920      | 1104.532016    | 552.769646       | 1103.548000    | 552.277638       | 9  |
| 9  | 975.493444  | 488.250360      |                |                  | 957.482879     | 479.245077       | S    | 935.479252  | 468.243264      | 918.452703     | 459.729989       | 917.468687     | 459.237981       | 8  |
| 10 | 1076.541123 | 538.774199      |                |                  | 1058.530558    | 529.768917       | T    | 848.447224  | 424.727250      | 831.420675     | 416.213975       | 830.436659     | 415.721967       | 7  |
| 11 | 1177.588802 | 589.298039      |                |                  | 1159.578237    | 580.292756       | T    | 747.399545  | 374.203411      | 730.372996     | 365.690136       | 729.388980     | 365.198128       | 6  |
| 12 | 1305.647380 | 653.327328      | 1288.620831    | 644.814053       | 1287.636815    | 644.322045       | Q    | 646.351866  | 323.679571      | 629.325317     | 315.166296       | 628.341301     | 314.674288       | 5  |
| 13 | 1434.689973 | 717.848624      | 1417.663424    | 709.335350       | 1416.679408    | 708.843342       | E    | 518.293288  | 259.650282      | 501.266739     | 251.137008       | 500.282723     | 250.645000       | 4  |
| 14 | 1535.737652 | 768.372464      | 1518.711103    | 759.859189       | 1517.727087    | 759.367181       | T    | 389.250695  | 195.128985      | 372.224146     | 186.615711       | 371.240130     | 186.123703       | 3  |
| 15 | 1648.821716 | 824.914496      | 1631.795167    | 816.401221       | 1630.811151    | 815.909213       | L    | 288.203016  | 144.605146      | 271.176467     | 136.091871       |                |                  | 2  |
| 16 |             |                 |                |                  |                |                  | R    | 175.118952  | 88.063114       | 158.092403     | 79.549839        |                |                  | 1  |

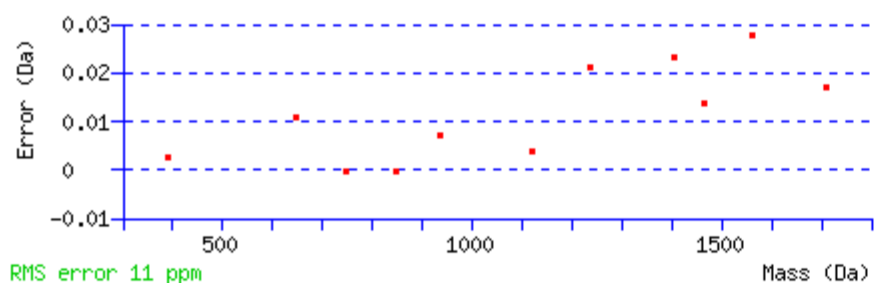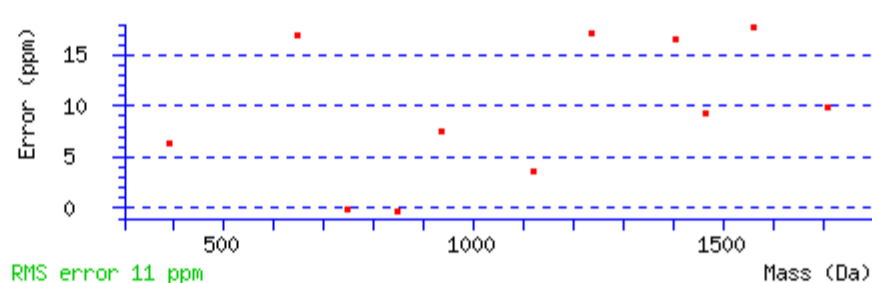

NCBI BLAST search of **LFVGGLDWSTTQETLR**

(Parameters: blastp, nr protein database, expect=20000, no filter, PAM30)

Other BLAST [web gateways](#)

All matches to this query

| Score | Mr(calc):   | Delta    | Sequence                         |
|-------|-------------|----------|----------------------------------|
| 92.2  | 1821.926132 | 0.006336 | <a href="#">LFVGGLDWSTTQETLR</a> |

Mascot: <http://www.matrixscience.com/>

**Peptide View**

MS/MS Fragmentation of **SETEDSILHQLFIVR**

Found in **DP13A\_HUMAN**, DCC-interacting protein 13-alpha OS=Homo sapiens GN=APPL1 PE=1 SV=1

Match to Query 55401: 1785.926532 from(596.316120,3+) rtinseconds(3657) index(52014)

Title: Locus:1.1.1.2838.6

Data file 2011-11-14 - TFD - EP 7-2.mgf

Click mouse within plot area to zoom in by factor of two about that point

Or, Plot from  to  Da

Label all possible matches  Label matches used for scoring

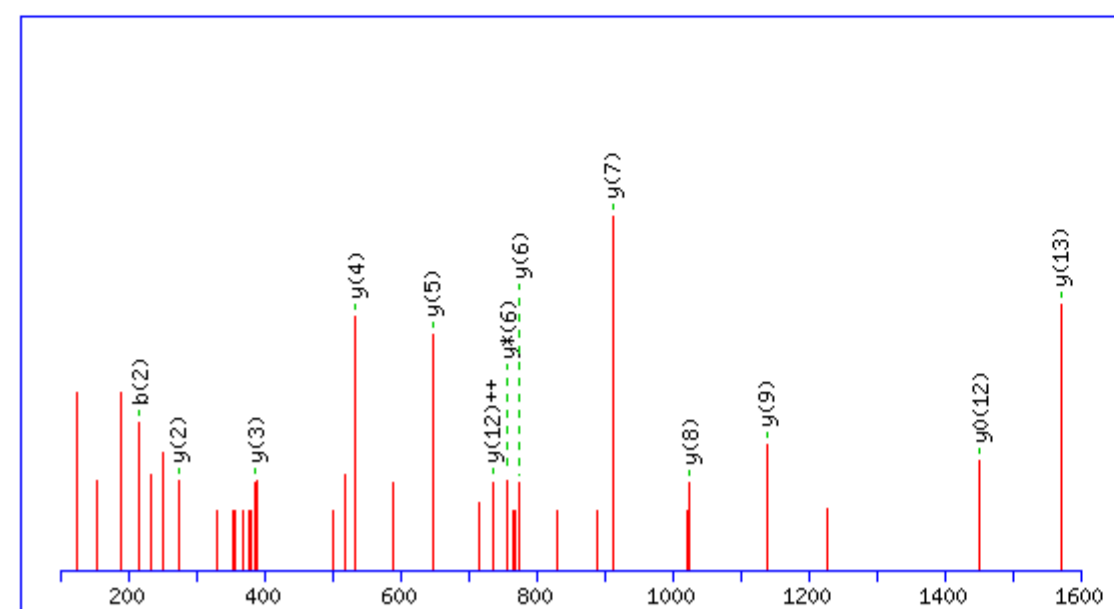

Monoisotopic mass of neutral peptide Mr(calcd): 1785.926102

Fixed modifications: Propionamide (C) (apply to specified residues or termini only)

Ions Score: 47 Expect: 7.7e-005

Matches : 13/132 fragment ions using 27 most intense peaks [\(help\)](#)

| #  | b           | b <sup>++</sup> | b <sup>+</sup> | b <sup>*++</sup> | b <sup>0</sup> | b <sup>0++</sup> | Seq. | y           | y <sup>++</sup> | y <sup>+</sup> | y <sup>*++</sup> | y <sup>0</sup> | y <sup>0++</sup> | #  |
|----|-------------|-----------------|----------------|------------------|----------------|------------------|------|-------------|-----------------|----------------|------------------|----------------|------------------|----|
| 1  | 88.039304   | 44.523290       |                |                  | 70.028739      | 35.518008        | S    |             |                 |                |                  |                |                  | 15 |
| 2  | 217.081897  | 109.044586      |                |                  | 199.071332     | 100.039304       | E    | 1699.901362 | 850.454319      | 1682.874813    | 841.941044       | 1681.890797    | 841.449036       | 14 |
| 3  | 318.129576  | 159.568426      |                |                  | 300.119011     | 150.563144       | T    | 1570.858769 | 785.933022      | 1553.832220    | 777.419748       | 1552.848204    | 776.927740       | 13 |
| 4  | 447.172169  | 224.089722      |                |                  | 429.161604     | 215.084440       | E    | 1469.811090 | 735.409183      | 1452.784541    | 726.895909       | 1451.800525    | 726.403900       | 12 |
| 5  | 562.199112  | 281.603194      |                |                  | 544.188547     | 272.597912       | D    | 1340.768497 | 670.887886      | 1323.741948    | 662.374612       | 1322.757932    | 661.882604       | 11 |
| 6  | 649.231140  | 325.119208      |                |                  | 631.220575     | 316.113925       | S    | 1225.741554 | 613.374415      | 1208.715005    | 604.861141       | 1207.730989    | 604.369132       | 10 |
| 7  | 762.315204  | 381.661240      |                |                  | 744.304639     | 372.655958       | I    | 1138.709526 | 569.858401      | 1121.682977    | 561.345126       |                |                  | 9  |
| 8  | 875.399268  | 438.203272      |                |                  | 857.388703     | 429.197990       | L    | 1025.625462 | 513.316369      | 1008.598913    | 504.803094       |                |                  | 8  |
| 9  | 1012.458180 | 506.732728      |                |                  | 994.447615     | 497.727445       | H    | 912.541398  | 456.774337      | 895.514849     | 448.261062       |                |                  | 7  |
| 10 | 1140.516758 | 570.762017      | 1123.490209    | 562.248743       | 1122.506193    | 561.756734       | Q    | 775.482486  | 388.244881      | 758.455937     | 379.731607       |                |                  | 6  |
| 11 | 1253.600822 | 627.304049      | 1236.574273    | 618.790775       | 1235.590257    | 618.298766       | L    | 647.423908  | 324.215592      | 630.397359     | 315.702317       |                |                  | 5  |
| 12 | 1400.669236 | 700.838256      | 1383.642687    | 692.324982       | 1382.658671    | 691.832973       | F    | 534.339844  | 267.673560      | 517.313295     | 259.160286       |                |                  | 4  |
| 13 | 1513.753300 | 757.380288      | 1496.726751    | 748.867013       | 1495.742735    | 748.375005       | I    | 387.271430  | 194.139353      | 370.244881     | 185.626078       |                |                  | 3  |
| 14 | 1612.821714 | 806.914495      | 1595.795165    | 798.401221       | 1594.811149    | 797.909212       | V    | 274.187366  | 137.597321      | 257.160817     | 129.084047       |                |                  | 2  |
| 15 |             |                 |                |                  |                |                  | R    | 175.118952  | 88.063114       | 158.092403     | 79.549839        |                |                  | 1  |

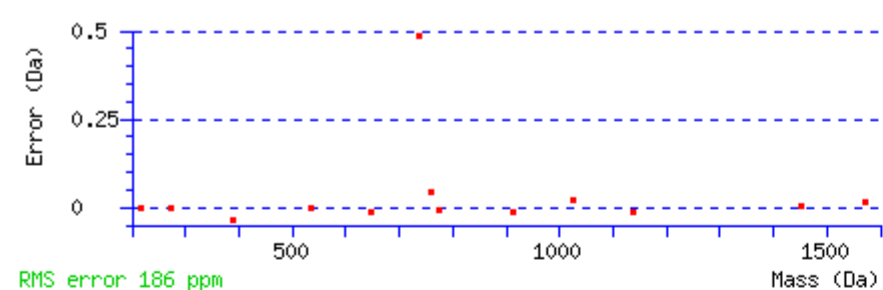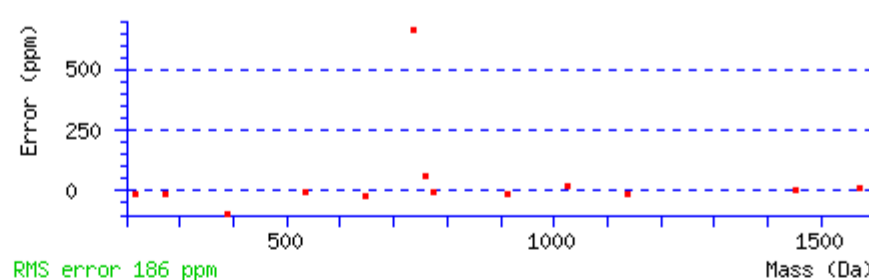

NCBI BLAST search of [SETEDSILHQLFIVR](#)

(Parameters: blastp, nr protein database, expect=20000, no filter, PAM30)

Other BLAST [web gateways](#)

All matches to this query

| Score | Mr(calcd):  | Delta     | Sequence                        |
|-------|-------------|-----------|---------------------------------|
| 46.5  | 1785.926102 | 0.000430  | <a href="#">SETEDSILHQLFIVR</a> |
| 2.5   | 1785.937317 | -0.010785 | <a href="#">HLEINPDHSIETLR</a>  |
| 0.4   | 1785.940704 | -0.014172 | <a href="#">TSPQQKLIIVEGCQR</a> |

# MASCOT Search Results

## Peptide View

MS/MS Fragmentation of **LIDPQTQVSR**

Found in **DP13B\_HUMAN**, DCC-interacting protein 13-beta OS=Homo sapiens GN=APPL2 PE=1 SV=3

Match to Query 27220: 1155.630748 from(578.822650,2+) rtinseconds(1616) index(15200)

Title: Locus:1.1.1.2059.33

Data file 2011-11-10 - TFD - EP 3-2.mgf

Click mouse within plot area to zoom in by factor of two about that point

Or, Plot from  to  Da

Label all possible matches  Label matches used for scoring

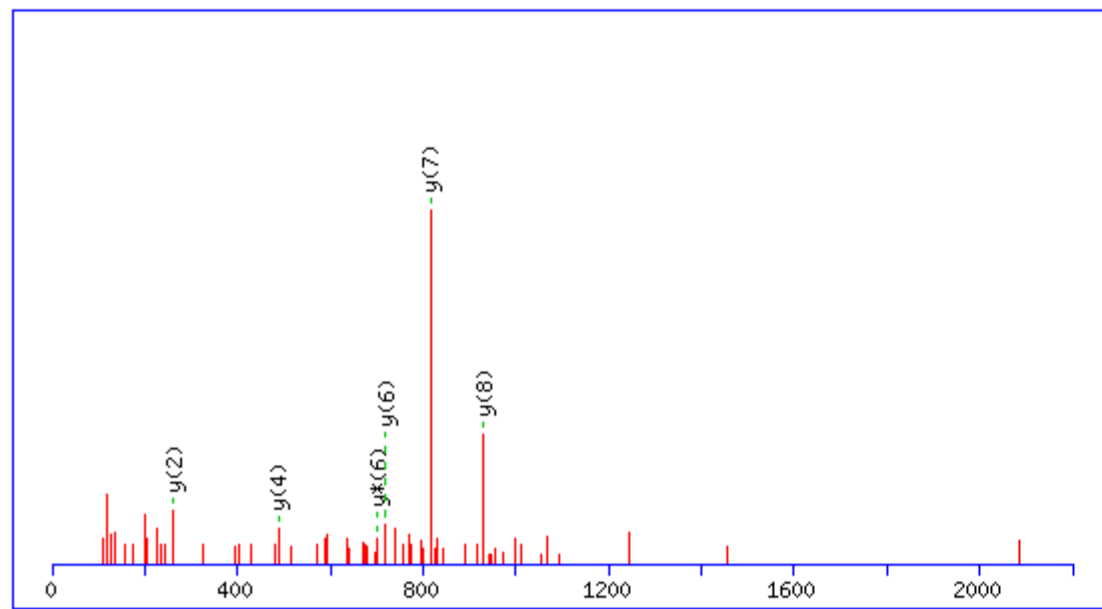

Monoisotopic mass of neutral peptide Mr(calc): 1155.624786

Fixed modifications: Propionamide (C) (apply to specified residues or termini only)

Ions Score: 32 Expect: 0.0011

Matches : 6/94 fragment ions using 10 most intense peaks [\(help\)](#)

| #  | b          | b <sup>++</sup> | b <sup>*</sup> | b <sup>+++</sup> | b <sup>0</sup> | b <sup>0++</sup> | Seq. | y                 | y <sup>++</sup> | y <sup>*</sup>    | y <sup>+++</sup> | y <sup>0</sup> | y <sup>0++</sup> | #  |
|----|------------|-----------------|----------------|------------------|----------------|------------------|------|-------------------|-----------------|-------------------|------------------|----------------|------------------|----|
| 1  | 114.091340 | 57.549308       |                |                  |                |                  | L    |                   |                 |                   |                  |                |                  | 10 |
| 2  | 227.175404 | 114.091340      |                |                  |                |                  | I    | 1043.548000       | 522.277638      | 1026.521451       | 513.764364       | 1025.537435    | 513.272356       | 9  |
| 3  | 342.202347 | 171.604811      |                |                  | 324.191782     | 162.599529       | D    | <b>930.463936</b> | 465.735606      | 913.437387        | 457.222332       | 912.453371     | 456.730324       | 8  |
| 4  | 439.255111 | 220.131193      |                |                  | 421.244546     | 211.125911       | P    | <b>815.436993</b> | 408.222135      | 798.410444        | 399.708860       | 797.426428     | 399.216852       | 7  |
| 5  | 567.313689 | 284.160483      | 550.287140     | 275.647208       | 549.303124     | 275.155200       | Q    | <b>718.384229</b> | 359.695753      | <b>701.357680</b> | 351.182478       | 700.373664     | 350.690470       | 6  |
| 6  | 668.361368 | 334.684322      | 651.334819     | 326.171048       | 650.350803     | 325.679040       | T    | 590.325651        | 295.666464      | 573.299102        | 287.153189       | 572.315086     | 286.661181       | 5  |
| 7  | 796.419946 | 398.713611      | 779.393397     | 390.200337       | 778.409381     | 389.708329       | Q    | <b>489.277972</b> | 245.142624      | 472.251423        | 236.629349       | 471.267407     | 236.137341       | 4  |
| 8  | 895.488360 | 448.247818      | 878.461811     | 439.734544       | 877.477795     | 439.242536       | V    | 361.219394        | 181.113335      | 344.192845        | 172.600060       | 343.208829     | 172.108052       | 3  |
| 9  | 982.520388 | 491.763832      | 965.493839     | 483.250558       | 964.509823     | 482.758550       | S    | <b>262.150980</b> | 131.579128      | 245.124431        | 123.065854       | 244.140415     | 122.573846       | 2  |
| 10 |            |                 |                |                  |                |                  | R    | 175.118952        | 88.063114       | 158.092403        | 79.549840        |                |                  | 1  |

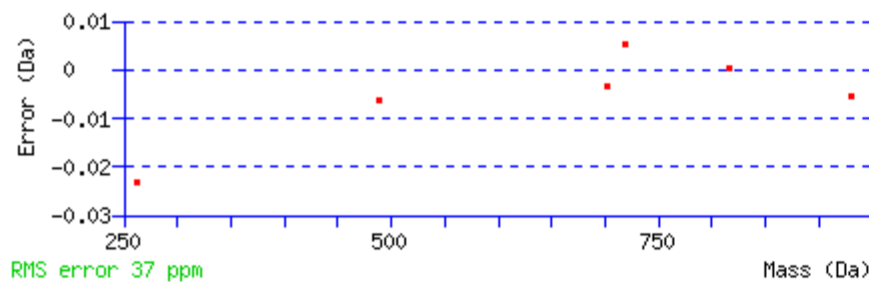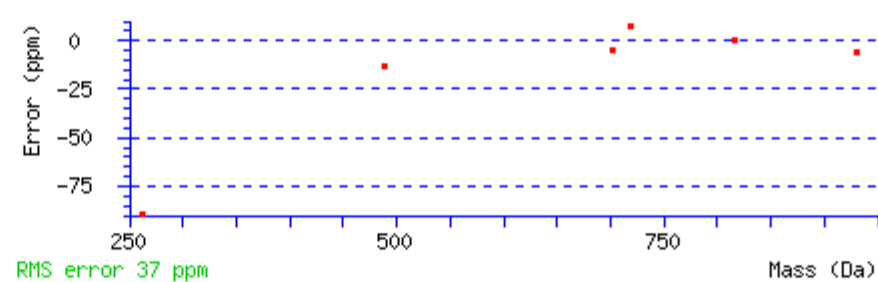

NCBI BLAST search of [LIDPQTQVSR](#)

(Parameters: blastp, nr protein database, expect=20000, no filter, PAM30)

Other BLAST [web gateways](#)

All matches to this query

| Score | Mr(calc):   | Delta     | Sequence                   |
|-------|-------------|-----------|----------------------------|
| 32.4  | 1155.624786 | 0.005962  | <a href="#">LIDPQTQVSR</a> |
| 0.7   | 1155.636002 | -0.005254 | <a href="#">VPKNSLQQSR</a> |

Mascot: <http://www.matrixscience.com/>

# MASCOT SCIENCE Mascot Search Results

## Peptide View

MS/MS Fragmentation of **TDGEPGPQGWSPR**

Found in **DCTP1\_HUMAN**, dCTP pyrophosphatase 1 OS=Homo sapiens GN=DCTPP1 PE=1 SV=1

Match to Query 38342: 1382.631548 from(692.323050,2+) rtinseconds(1902) index(17911)

Title: Locus:1.1.1.1991.50

Data file 2011-11-10 - TFD - EP 3-6.mgf

Click mouse within plot area to zoom in by factor of two about that point

Or, Plot from  to  Da

Label all possible matches  Label matches used for scoring

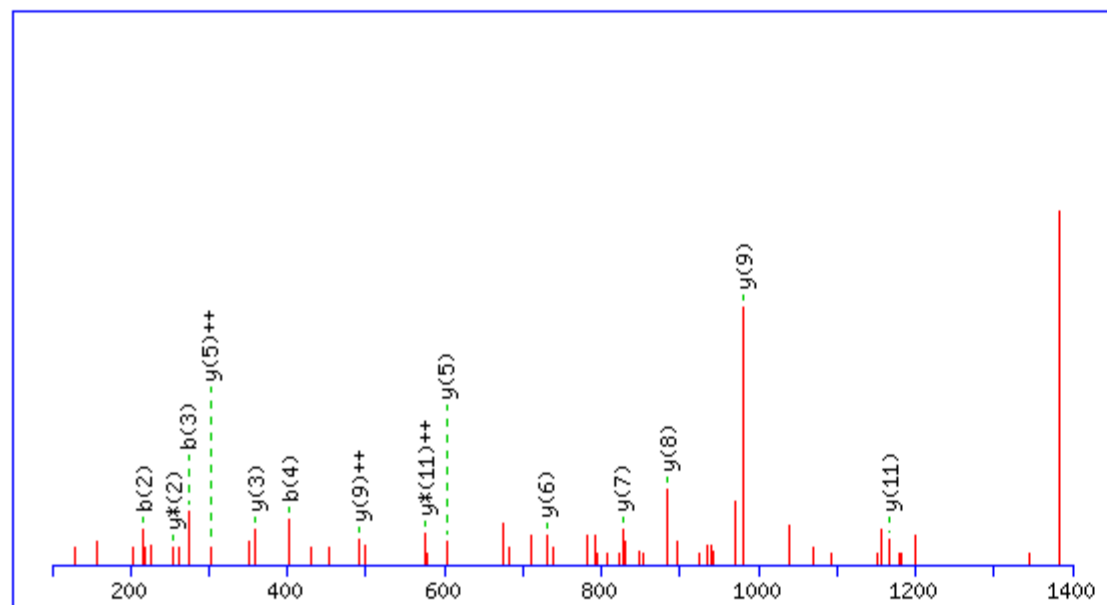

Monoisotopic mass of neutral peptide Mr(calc): 1382.621506

Fixed modifications: Propionamide (C) (apply to specified residues or termini only)

Ions Score: 35 Expect: 0.00071

Matches : 14/126 fragment ions using 34 most intense peaks ([help](#))

| #  | b                 | b <sup>++</sup> | b <sup>*</sup> | b <sup>*++</sup> | b <sup>0</sup> | b <sup>0++</sup> | Seq. | y                  | y <sup>++</sup>   | y <sup>*</sup>    | y <sup>*++</sup>  | y <sup>0</sup> | y <sup>0++</sup> | #  |
|----|-------------------|-----------------|----------------|------------------|----------------|------------------|------|--------------------|-------------------|-------------------|-------------------|----------------|------------------|----|
| 1  | 102.054955        | 51.531116       |                |                  | 84.044390      | 42.525833        | T    |                    |                   |                   |                   |                |                  | 13 |
| 2  | <b>217.081898</b> | 109.044587      |                |                  | 199.071333     | 100.039304       | D    | 1282.581091        | 641.794184        | 1265.554542       | 633.280909        | 1264.570526    | 632.788901       | 12 |
| 3  | <b>274.103362</b> | 137.555319      |                |                  | 256.092797     | 128.550037       | G    | <b>1167.554148</b> | 584.280712        | 1150.527599       | <b>575.767438</b> | 1149.543583    | 575.275430       | 11 |
| 4  | <b>403.145955</b> | 202.076616      |                |                  | 385.135390     | 193.071333       | E    | 1110.532684        | 555.769980        | 1093.506135       | 547.256706        | 1092.522119    | 546.764698       | 10 |
| 5  | 500.198719        | 250.602998      |                |                  | 482.188154     | 241.597715       | P    | <b>981.490091</b>  | <b>491.248684</b> | 964.463542        | 482.735409        | 963.479526     | 482.243401       | 9  |
| 6  | 557.220183        | 279.113730      |                |                  | 539.209618     | 270.108447       | G    | <b>884.437327</b>  | 442.722302        | 867.410778        | 434.209027        | 866.426762     | 433.717019       | 8  |
| 7  | 654.272947        | 327.640112      |                |                  | 636.262382     | 318.634829       | P    | <b>827.415863</b>  | 414.211570        | 810.389314        | 405.698295        | 809.405298     | 405.206287       | 7  |
| 8  | 782.331525        | 391.669401      | 765.304976     | 383.156126       | 764.320960     | 382.664118       | Q    | <b>730.363099</b>  | 365.685188        | 713.336550        | 357.171913        | 712.352534     | 356.679905       | 6  |
| 9  | 839.352989        | 420.180133      | 822.326440     | 411.666858       | 821.342424     | 411.174850       | G    | <b>602.304521</b>  | <b>301.655899</b> | 585.277972        | 293.142624        | 584.293956     | 292.650616       | 5  |
| 10 | 1025.432302       | 513.219789      | 1008.405753    | 504.706515       | 1007.421737    | 504.214507       | W    | 545.283057         | 273.145167        | 528.256508        | 264.631892        | 527.272492     | 264.139884       | 4  |
| 11 | 1112.464330       | 556.735803      | 1095.437781    | 548.222529       | 1094.453765    | 547.730521       | S    | <b>359.203744</b>  | 180.105510        | 342.177195        | 171.592236        | 341.193179     | 171.100228       | 3  |
| 12 | 1209.517094       | 605.262185      | 1192.490545    | 596.748911       | 1191.506529    | 596.256903       | P    | 272.171716         | 136.589496        | <b>255.145167</b> | 128.076221        |                |                  | 2  |
| 13 |                   |                 |                |                  |                |                  | R    | 175.118952         | 88.063114         | 158.092403        | 79.549839         |                |                  | 1  |

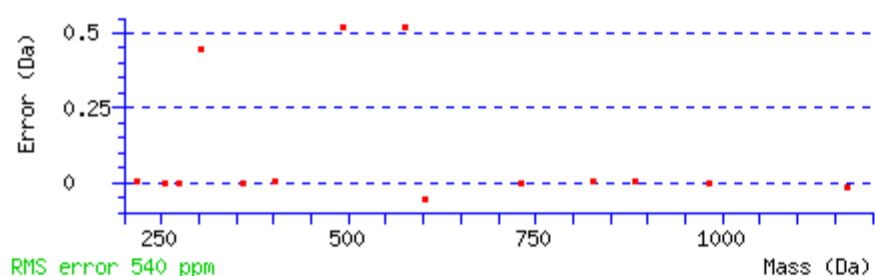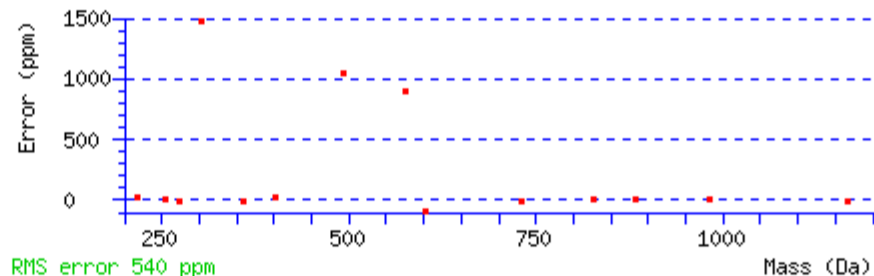

NCBI BLAST search of **TDGEPGPQGWSPR**

(Parameters: blastp, nr protein database, expect=20000, no filter, PAM30)

Other BLAST [web gateways](#)

All matches to this query

| Score | Mr(calc):   | Delta     | Sequence                      |
|-------|-------------|-----------|-------------------------------|
| 34.9  | 1382.621506 | 0.010042  | <a href="#">TDGEPGPQGWSPR</a> |
| 1.3   | 1382.628891 | 0.002657  | <a href="#">MWVFEETVNGR</a>   |
| 0.0   | 1382.644135 | -0.012587 | <a href="#">SWMLWNFVER</a>    |

Mascot: <http://www.matrixscience.com/>



# Mascot Search Results

## Peptide View

MS/MS Fragmentation of **VVLEDLASQVGLR**

Found in **DDRGK\_HUMAN**, DDRGK domain-containing protein 1 OS=Homo sapiens GN=DDRGK1 PE=1 SV=2

Match to Query 47359: 1510.877128 from(756.445840,2+) rtinseconds(3977) index(59972)

Title: Locus:1.1.1.2804.25

Data file 2011-11-12 - TFD - EP 6-4.mgf

Click mouse within plot area to zoom in by factor of two about that point

Or, Plot from  to  Da

Label all possible matches  Label matches used for scoring

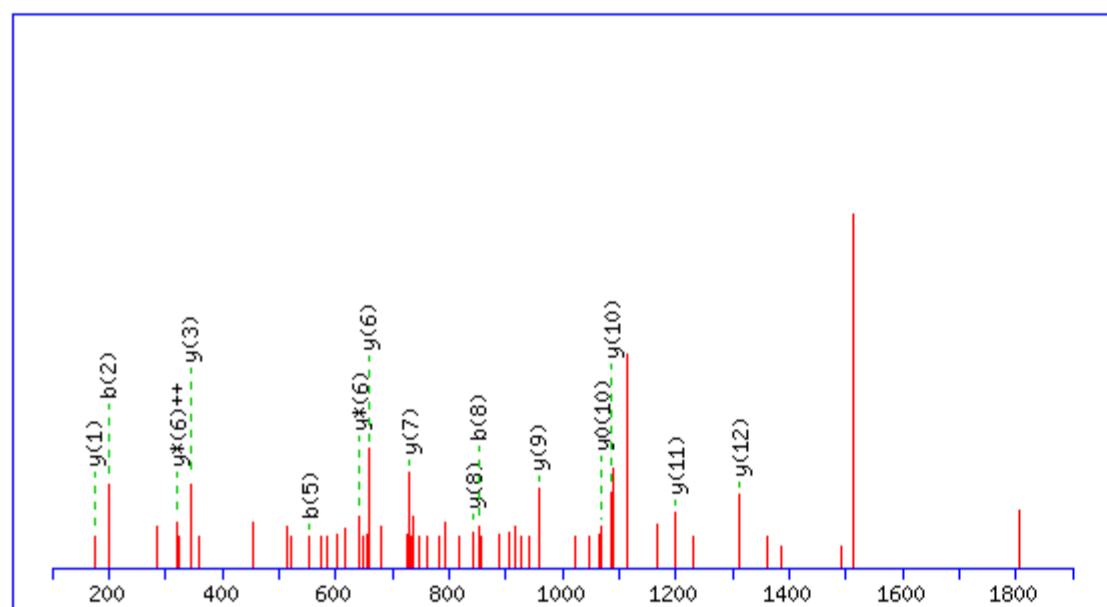

Monoisotopic mass of neutral peptide Mr(calc): 1510.871887

Fixed modifications: Propionamide (C) (apply to specified residues or termini only)

Ions Score: 54 Expect: 1.1e-005

Matches : 15/120 fragment ions using 33 most intense peaks [\(help\)](#)

| #  | b                 | b <sup>++</sup> | b <sup>*</sup> | b <sup>*++</sup> | b <sup>0</sup> | b <sup>0++</sup> | Seq. | y                  | y <sup>++</sup> | y <sup>*</sup>    | y <sup>*++</sup>  | y <sup>0</sup>     | y <sup>0++</sup> | #  |
|----|-------------------|-----------------|----------------|------------------|----------------|------------------|------|--------------------|-----------------|-------------------|-------------------|--------------------|------------------|----|
| 1  | 100.075690        | 50.541483       |                |                  |                |                  | V    |                    |                 |                   |                   |                    |                  | 14 |
| 2  | <b>199.144104</b> | 100.075690      |                |                  |                |                  | V    | 1412.810756        | 706.909016      | 1395.784207       | 698.395741        | 1394.800191        | 697.903733       | 13 |
| 3  | 312.228168        | 156.617722      |                |                  |                |                  | L    | <b>1313.742342</b> | 657.374809      | 1296.715793       | 648.861535        | 1295.731777        | 648.369527       | 12 |
| 4  | 425.312232        | 213.159754      |                |                  |                |                  | L    | <b>1200.658278</b> | 600.832777      | 1183.631729       | 592.319503        | 1182.647713        | 591.827494       | 11 |
| 5  | <b>554.354825</b> | 277.681051      |                |                  | 536.344260     | 268.675768       | E    | <b>1087.574214</b> | 544.290745      | 1070.547665       | 535.777471        | <b>1069.563649</b> | 535.285462       | 10 |
| 6  | 669.381768        | 335.194522      |                |                  | 651.371203     | 326.189240       | D    | <b>958.531621</b>  | 479.769448      | 941.505072        | 471.256174        | 940.521056         | 470.764166       | 9  |
| 7  | 782.465832        | 391.736554      |                |                  | 764.455267     | 382.731272       | L    | <b>843.504678</b>  | 422.255977      | 826.478129        | 413.742702        | 825.494113         | 413.250694       | 8  |
| 8  | <b>853.502946</b> | 427.255111      |                |                  | 835.492381     | 418.249829       | A    | <b>730.420614</b>  | 365.713945      | 713.394065        | 357.200670        | 712.410049         | 356.708662       | 7  |
| 9  | 940.534974        | 470.771125      |                |                  | 922.524409     | 461.765843       | S    | <b>659.383500</b>  | 330.195388      | <b>642.356951</b> | <b>321.682113</b> | 641.372935         | 321.190105       | 6  |
| 10 | 1068.593552       | 534.800414      | 1051.567003    | 526.287140       | 1050.582987    | 525.795132       | Q    | 572.351472         | 286.679374      | 555.324923        | 278.166099        |                    |                  | 5  |
| 11 | 1167.661966       | 584.334621      | 1150.635417    | 575.821347       | 1149.651401    | 575.329339       | V    | 444.292894         | 222.650085      | 427.266345        | 214.136810        |                    |                  | 4  |
| 12 | 1224.683430       | 612.845353      | 1207.656881    | 604.332079       | 1206.672865    | 603.840071       | G    | <b>345.224480</b>  | 173.115878      | 328.197931        | 164.602603        |                    |                  | 3  |
| 13 | 1337.767494       | 669.387385      | 1320.740945    | 660.874111       | 1319.756929    | 660.382102       | L    | 288.203016         | 144.605146      | 271.176467        | 136.091871        |                    |                  | 2  |
| 14 |                   |                 |                |                  |                |                  | R    | <b>175.118952</b>  | 88.063114       | 158.092403        | 79.549839         |                    |                  | 1  |

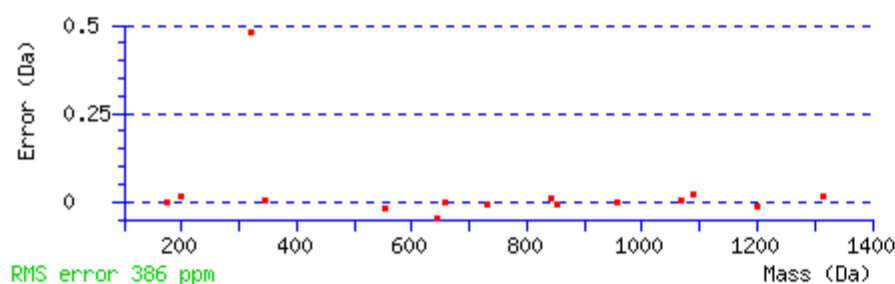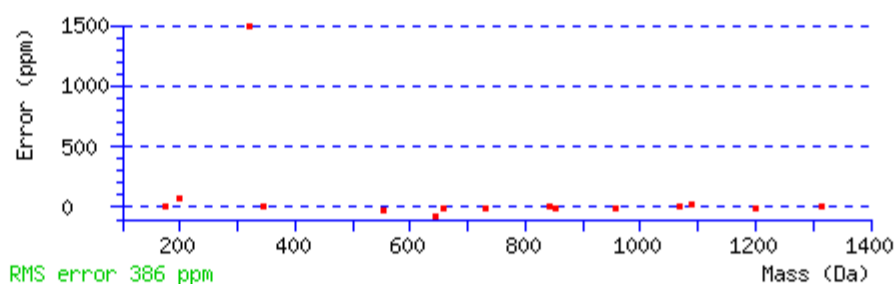

NCBI BLAST search of **VVLEDLASQVGLR**

(Parameters: blastp, nr protein database, expect=20000, no filter, PAM30)

Other BLAST [web gateways](#)

All matches to this query

| Score | Mr(calc):   | Delta    | Sequence                      |
|-------|-------------|----------|-------------------------------|
| 54.2  | 1510.871887 | 0.005241 | <a href="#">VVLEDLASQVGLR</a> |

Mascot: <http://www.matrixscience.com/>

**Peptide View**

MS/MS Fragmentation of **LTGIPSHILNSSPSDR**

Found in **CRADD\_HUMAN**, Death domain-containing protein CRADD OS=Homo sapiens GN=CRADD PE=1 SV=1

Match to Query 48424: 1692.878622 from(565.300150,3+) rtinseconds(2301) index(25248)

Title: Locus:1.1.1.2167.29

Data file 2011-11-13 - TFD - EP 7-6.mgf

Click mouse within plot area to zoom in by factor of two about that point

Or, Plot from  to  Da

Label all possible matches  Label matches used for scoring

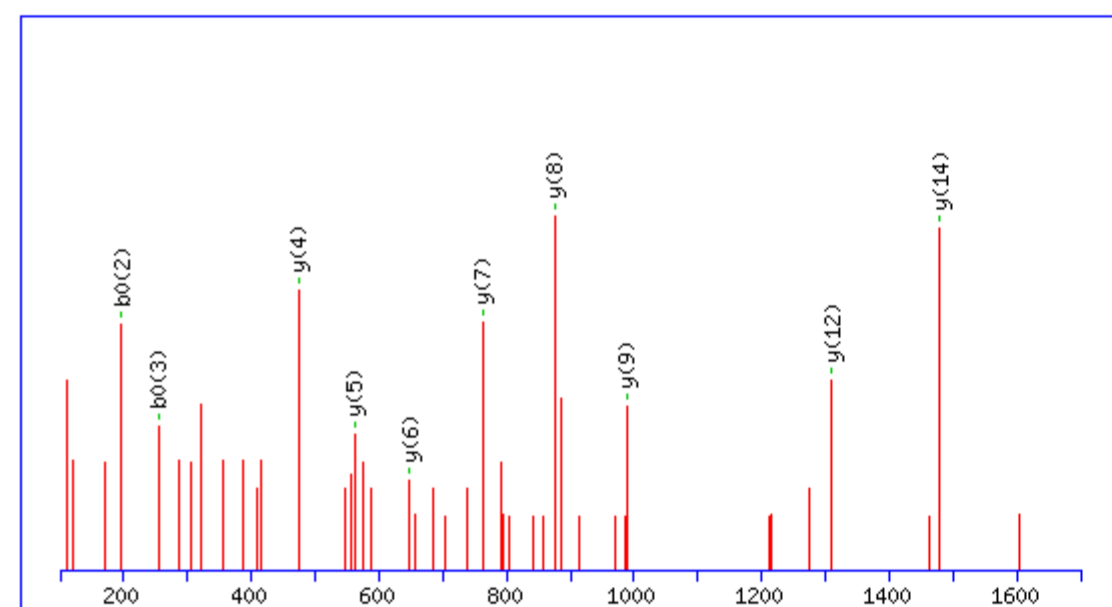

Monoisotopic mass of neutral peptide Mr(calc): 1692.879486

Fixed modifications: Propionamide (C) (apply to specified residues or termini only)

Ions Score: 59 Expect: 1.2e-005

Matches : 10/158 fragment ions using 12 most intense peaks ([help](#))

| #  | b           | b <sup>++</sup> | b <sup>+</sup> | b <sup>*++</sup> | b <sup>0</sup> | b <sup>0++</sup> | Seq. | y           | y <sup>++</sup> | y <sup>+</sup> | y <sup>*++</sup> | y <sup>0</sup> | y <sup>0++</sup> | #  |
|----|-------------|-----------------|----------------|------------------|----------------|------------------|------|-------------|-----------------|----------------|------------------|----------------|------------------|----|
| 1  | 114.091340  | 57.549308       |                |                  |                |                  | L    |             |                 |                |                  |                |                  | 16 |
| 2  | 215.139019  | 108.073147      |                |                  | 197.128454     | 99.067865        | T    | 1580.802709 | 790.904993      | 1563.776160    | 782.391718       | 1562.792144    | 781.899710       | 15 |
| 3  | 272.160483  | 136.583879      |                |                  | 254.149918     | 127.578597       | G    | 1479.755030 | 740.381153      | 1462.728481    | 731.867879       | 1461.744465    | 731.375871       | 14 |
| 4  | 385.244547  | 193.125912      |                |                  | 367.233982     | 184.120629       | I    | 1422.733566 | 711.870421      | 1405.707017    | 703.357147       | 1404.723001    | 702.865139       | 13 |
| 5  | 482.297311  | 241.652293      |                |                  | 464.286746     | 232.647011       | P    | 1309.649502 | 655.328389      | 1292.622953    | 646.815115       | 1291.638937    | 646.323107       | 12 |
| 6  | 569.329339  | 285.168308      |                |                  | 551.318774     | 276.163025       | S    | 1212.596738 | 606.802007      | 1195.570189    | 598.288733       | 1194.586173    | 597.796725       | 11 |
| 7  | 706.388251  | 353.697764      |                |                  | 688.377686     | 344.692481       | H    | 1125.564710 | 563.285993      | 1108.538161    | 554.772719       | 1107.554145    | 554.280711       | 10 |
| 8  | 819.472315  | 410.239796      |                |                  | 801.461750     | 401.234513       | I    | 988.505798  | 494.756537      | 971.479249     | 486.243263       | 970.495233     | 485.751255       | 9  |
| 9  | 932.556379  | 466.781828      |                |                  | 914.545814     | 457.776545       | L    | 875.421734  | 438.214505      | 858.395185     | 429.701231       | 857.411169     | 429.209223       | 8  |
| 10 | 1046.599306 | 523.803291      | 1029.572757    | 515.290017       | 1028.588741    | 514.798009       | N    | 762.337670  | 381.672473      | 745.311121     | 373.159199       | 744.327105     | 372.667191       | 7  |
| 11 | 1133.631334 | 567.319305      | 1116.604785    | 558.806031       | 1115.620769    | 558.314023       | S    | 648.294743  | 324.651010      | 631.268194     | 316.137735       | 630.284178     | 315.645727       | 6  |
| 12 | 1220.663362 | 610.835319      | 1203.636813    | 602.322045       | 1202.652797    | 601.830037       | S    | 561.262715  | 281.134996      | 544.236166     | 272.621721       | 543.252150     | 272.129713       | 5  |
| 13 | 1317.716126 | 659.361701      | 1300.689577    | 650.848427       | 1299.705561    | 650.356419       | P    | 474.230687  | 237.618982      | 457.204138     | 229.105707       | 456.220122     | 228.613699       | 4  |
| 14 | 1404.748154 | 702.877715      | 1387.721605    | 694.364441       | 1386.737589    | 693.872433       | S    | 377.177923  | 189.092600      | 360.151374     | 180.579325       | 359.167358     | 180.087317       | 3  |
| 15 | 1519.775097 | 760.391187      | 1502.748548    | 751.877912       | 1501.764532    | 751.385904       | D    | 290.145895  | 145.576585      | 273.119346     | 137.063311       | 272.135330     | 136.571303       | 2  |
| 16 |             |                 |                |                  |                |                  | R    | 175.118952  | 88.063114       | 158.092403     | 79.549839        |                |                  | 1  |

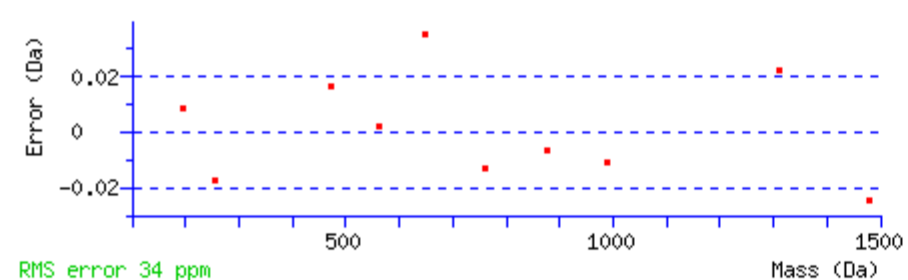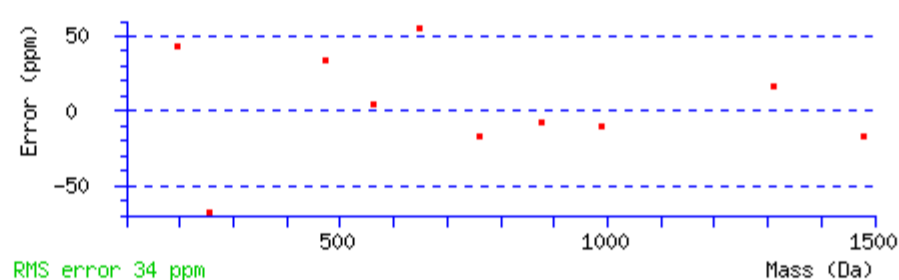

NCBI BLAST search of **LTGIPSHILNSSPSDR**

(Parameters: blastp, nr protein database, expect=20000, no filter, PAM30)

Other BLAST [web gateways](#)

All matches to this query

| Score | Mr(calc):   | Delta     | Sequence                         |
|-------|-------------|-----------|----------------------------------|
| 59.3  | 1692.879486 | -0.000864 | <a href="#">LTGIPSHILNSSPSDR</a> |

# MASCOT SEARCH RESULTS

## Peptide View

MS/MS Fragmentation of **VAELYLPLLSIAR**

Found in **DOCK6\_HUMAN**, Dedicator of cytokinesis protein 6 OS=Homo sapiens GN=DOCK6 PE=1 SV=3

Match to Query 43094: 1456.871808 from(729.443180,2+) rtinseconds(4207) index(61944)

Title: Locus:1.1.1.3009.29

Data file 2011-11-10 - TFD - EP 3-1.mgf

Click mouse within plot area to zoom in by factor of two about that point

Or, Plot from  to  Da

Label all possible matches  Label matches used for scoring

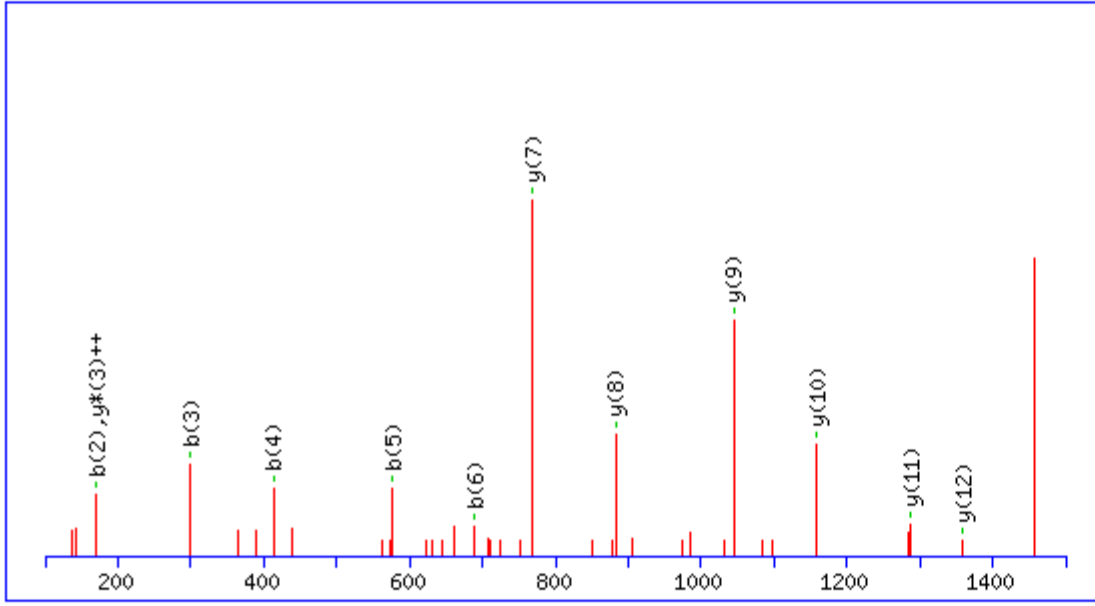

Monoisotopic mass of neutral peptide  $M_r(\text{calc})$ : 1456.865311

Fixed modifications: Propionamide (C) (apply to specified residues or termini only)

Ions Score: 51 Expect: 1e-005

Matches : 12/110 fragment ions using 13 most intense peaks [\(help\)](#)

| #  | b                 | b <sup>++</sup> | b <sup>0</sup> | b <sup>0++</sup> | Seq. | y                  | y <sup>++</sup> | y <sup>*</sup> | y <sup>*++</sup>  | y <sup>0</sup> | y <sup>0++</sup> | #  |
|----|-------------------|-----------------|----------------|------------------|------|--------------------|-----------------|----------------|-------------------|----------------|------------------|----|
| 1  | 100.075690        | 50.541483       |                |                  | V    |                    |                 |                |                   |                |                  | 13 |
| 2  | <b>171.112804</b> | 86.060040       |                |                  | A    | <b>1358.804214</b> | 679.905745      | 1341.777665    | 671.392471        | 1340.793649    | 670.900463       | 12 |
| 3  | <b>300.155397</b> | 150.581336      | 282.144832     | 141.576054       | E    | <b>1287.767100</b> | 644.387188      | 1270.740551    | 635.873914        | 1269.756535    | 635.381906       | 11 |
| 4  | <b>413.239461</b> | 207.123369      | 395.228896     | 198.118086       | L    | <b>1158.724507</b> | 579.865892      | 1141.697958    | 571.352617        | 1140.713942    | 570.860609       | 10 |
| 5  | <b>576.302790</b> | 288.655033      | 558.292225     | 279.649751       | Y    | <b>1045.640443</b> | 523.323860      | 1028.613894    | 514.810585        | 1027.629878    | 514.318577       | 9  |
| 6  | <b>689.386854</b> | 345.197065      | 671.376289     | 336.191783       | L    | <b>882.577114</b>  | 441.792195      | 865.550565     | 433.278921        | 864.566549     | 432.786913       | 8  |
| 7  | 786.439618        | 393.723447      | 768.429053     | 384.718165       | P    | <b>769.493050</b>  | 385.250163      | 752.466501     | 376.736889        | 751.482485     | 376.244881       | 7  |
| 8  | 899.523682        | 450.265479      | 881.513117     | 441.260197       | L    | 672.440286         | 336.723781      | 655.413737     | 328.210507        | 654.429721     | 327.718499       | 6  |
| 9  | 1012.607746       | 506.807511      | 994.597181     | 497.802229       | L    | 559.356222         | 280.181749      | 542.329673     | 271.668475        | 541.345657     | 271.176467       | 5  |
| 10 | 1099.639774       | 550.323525      | 1081.629209    | 541.318243       | S    | 446.272158         | 223.639717      | 429.245609     | 215.126442        | 428.261593     | 214.634434       | 4  |
| 11 | 1212.723838       | 606.865557      | 1194.713273    | 597.860275       | I    | 359.240130         | 180.123703      | 342.213581     | <b>171.610428</b> |                |                  | 3  |
| 12 | 1283.760952       | 642.384114      | 1265.750387    | 633.378832       | A    | 246.156066         | 123.581671      | 229.129517     | 115.068396        |                |                  | 2  |
| 13 |                   |                 |                |                  | R    | 175.118952         | 88.063114       | 158.092403     | 79.549839         |                |                  | 1  |

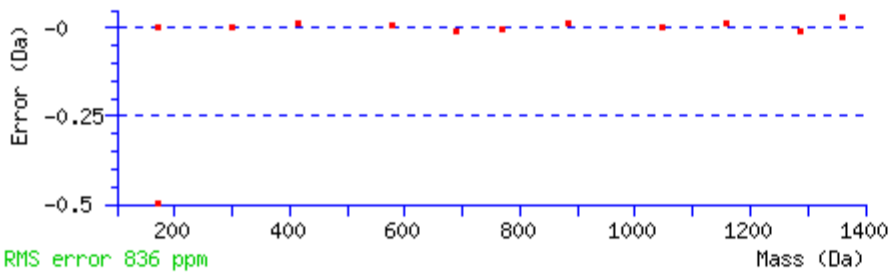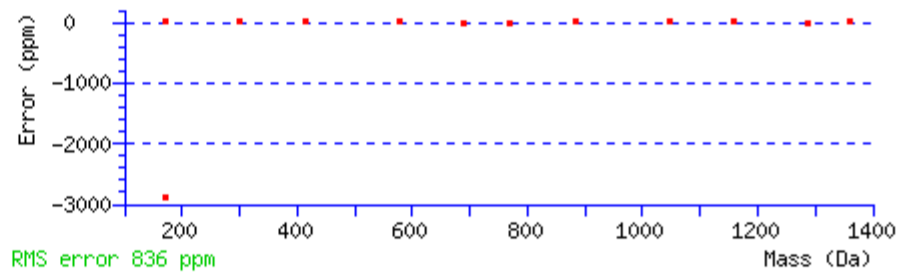

NCBI BLAST search of [VAELYLPLLSIAR](#)

(Parameters: blastp, nr protein database, expect=20000, no filter, PAM30)

Other BLAST [web gateways](#)

All matches to this query

| Score | $M_r(\text{calc})$ : | Delta    | Sequence                      |
|-------|----------------------|----------|-------------------------------|
| 50.5  | 1456.865311          | 0.006497 | <a href="#">VAELYLPLLSIAR</a> |

Mascot: <http://www.matrixscience.com/>

# MASCOT SEARCH RESULTS

## Peptide View

MS/MS Fragmentation of **TLAIELAPR**

Found in **DHRS4\_HUMAN**, Dehydrogenase/reductase SDR family member 4 OS=Homo sapiens GN=DHRS4 PE=1 SV=3

Match to Query 14727: 982.571928 from(492.293240,2+) rtinseconds(2410) index(29793)

Title: Locus:1.1.1.2334.7

Data file 2011-11-12 - TFD - EP 5-4.mgf

Click mouse within plot area to zoom in by factor of two about that point

Or, Plot from  to  Da

Label all possible matches  Label matches used for scoring

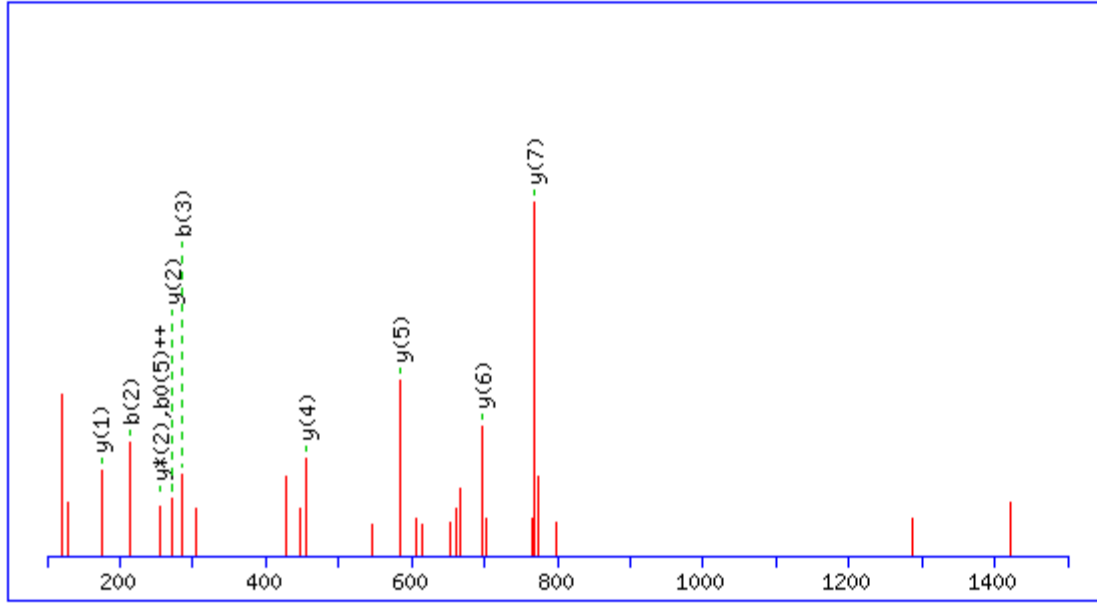

Monoisotopic mass of neutral peptide Mr(calc): 982.581100

Fixed modifications: Propionamide (C) (apply to specified residues or termini only)

Ions Score: 40 Expect: 0.00083

Matches : 10/72 fragment ions using 18 most intense peaks [\(help\)](#)

| # | b                 | b <sup>++</sup> | b <sup>0</sup> | b <sup>0++</sup>  | Seq. | y                 | y <sup>++</sup> | y <sup>*</sup>    | y <sup>*++</sup> | y <sup>0</sup> | y <sup>0++</sup> | # |
|---|-------------------|-----------------|----------------|-------------------|------|-------------------|-----------------|-------------------|------------------|----------------|------------------|---|
| 1 | 102.054955        | 51.531116       | 84.044390      | 42.525833         | T    |                   |                 |                   |                  |                |                  | 9 |
| 2 | <b>215.139019</b> | 108.073147      | 197.128454     | 99.067865         | L    | 882.540729        | 441.774003      | 865.514180        | 433.260728       | 864.530164     | 432.768720       | 8 |
| 3 | <b>286.176133</b> | 143.591704      | 268.165568     | 134.586422        | A    | <b>769.456665</b> | 385.231971      | 752.430116        | 376.718696       | 751.446100     | 376.226688       | 7 |
| 4 | 399.260197        | 200.133737      | 381.249632     | 191.128454        | I    | <b>698.419551</b> | 349.713414      | 681.393002        | 341.200139       | 680.408986     | 340.708131       | 6 |
| 5 | 528.302790        | 264.655033      | 510.292225     | <b>255.649751</b> | E    | <b>585.335487</b> | 293.171382      | 568.308938        | 284.658107       | 567.324922     | 284.166099       | 5 |
| 6 | 641.386854        | 321.197065      | 623.376289     | 312.191783        | L    | <b>456.292894</b> | 228.650085      | 439.266345        | 220.136810       |                |                  | 4 |
| 7 | 712.423968        | 356.715622      | 694.413403     | 347.710340        | A    | 343.208830        | 172.108053      | 326.182281        | 163.594778       |                |                  | 3 |
| 8 | 809.476732        | 405.242004      | 791.466167     | 396.236722        | P    | <b>272.171716</b> | 136.589496      | <b>255.145167</b> | 128.076221       |                |                  | 2 |
| 9 |                   |                 |                |                   | R    | <b>175.118952</b> | 88.063114       | 158.092403        | 79.549839        |                |                  | 1 |

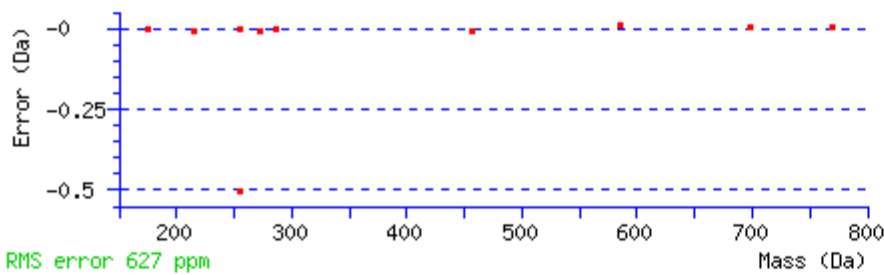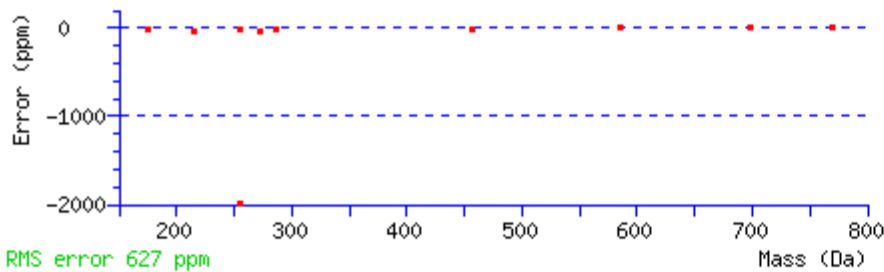

NCBI BLAST search of [TLAIELAPR](#)

(Parameters: blastp, nr protein database, expect=20000, no filter, PAM30)

Other BLAST [web gateways](#)

## All matches to this query

| Score | Mr(calc):  | Delta     | Sequence                  |
|-------|------------|-----------|---------------------------|
| 39.7  | 982.581100 | -0.009172 | <a href="#">TLAIELAPR</a> |
| 6.4   | 982.581131 | -0.009203 | <a href="#">TPITLLGPR</a> |
| 0.4   | 982.569901 | 0.002027  | <a href="#">DGLPVLIPK</a> |

# **{MATRIX} SCIENCE** Mascot Search Results

## Peptide View

MS/MS Fragmentation of **DILVLPLDLTDTGSHEAATK**

Found in **DHRS7\_HUMAN**, Dehydrogenase/reductase SDR family member 7 OS=Homo sapiens GN=DHRS7 PE=1 SV=1

Match to Query 66212: 2108.094612 from(703.705480,3+) rtinseconds(3502) index(51353)

Title: Locus:1.1.1.2656.25

Data file 2011-11-10 - TFD - EP 4-4.mgf

Click mouse within plot area to zoom in by factor of two about that point

Or, Plot from  to  Da

Label all possible matches  Label matches used for scoring

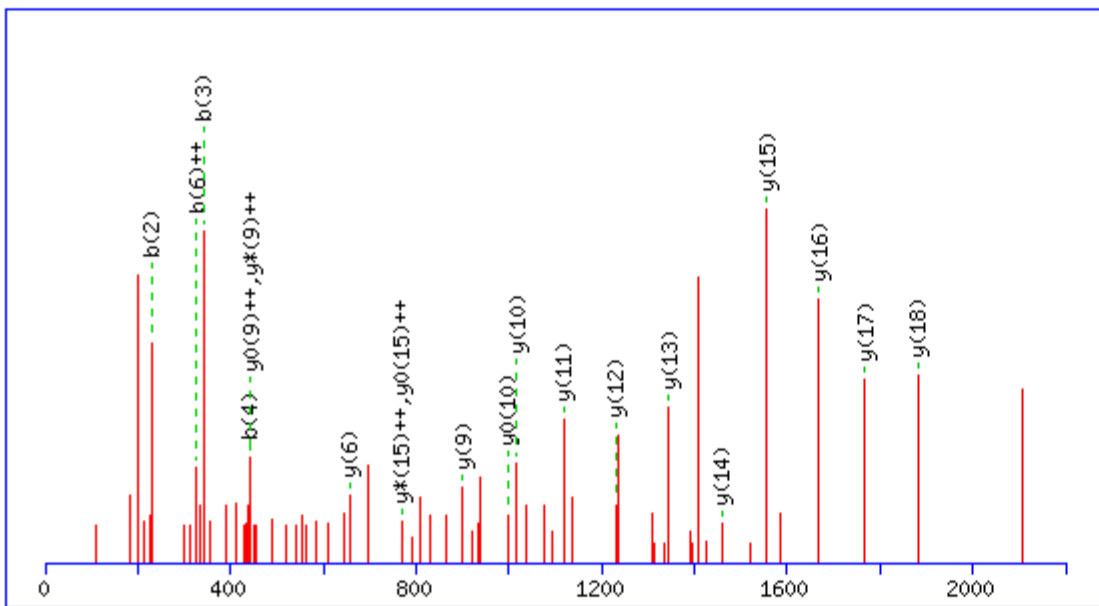

Monoisotopic mass of neutral peptide Mr(calc): 2108.100113

Fixed modifications: Propionamide (C) (apply to specified residues or termini only)

Ions Score: 67 Expect: 1.3e-006

Matches : 20/188 fragment ions using 33 most intense peaks [\(help\)](#)

| #  | b                 | b <sup>++</sup>   | b <sup>0</sup> | b <sup>0++</sup> | Seq. | y                  | y <sup>++</sup> | y <sup>*</sup> | y <sup>*++</sup>  | y <sup>0</sup>    | y <sup>0++</sup>  | #  |
|----|-------------------|-------------------|----------------|------------------|------|--------------------|-----------------|----------------|-------------------|-------------------|-------------------|----|
| 1  | 116.034219        | 58.520748         | 98.023654      | 49.515465        | D    |                    |                 |                |                   |                   |                   | 20 |
| 2  | <b>229.118283</b> | 115.062779        | 211.107718     | 106.057497       | I    | 1994.080450        | 997.543863      | 1977.053901    | 989.030589        | 1976.069885       | 988.538581        | 19 |
| 3  | <b>342.202347</b> | 171.604811        | 324.191782     | 162.599529       | L    | <b>1880.996386</b> | 941.001831      | 1863.969837    | 932.488557        | 1862.985821       | 931.996549        | 18 |
| 4  | <b>441.270761</b> | 221.139018        | 423.260196     | 212.133736       | V    | <b>1767.912322</b> | 884.459799      | 1750.885773    | 875.946525        | 1749.901757       | 875.454517        | 17 |
| 5  | 554.354825        | 277.681051        | 536.344260     | 268.675768       | L    | <b>1668.843908</b> | 834.925592      | 1651.817359    | 826.412318        | 1650.833343       | 825.920310        | 16 |
| 6  | 651.407589        | <b>326.207433</b> | 633.397024     | 317.202150       | P    | <b>1555.759844</b> | 778.383560      | 1538.733295    | <b>769.870286</b> | 1537.749279       | <b>769.378278</b> | 15 |
| 7  | 764.491653        | 382.749465        | 746.481088     | 373.744182       | L    | <b>1458.707080</b> | 729.857178      | 1441.680531    | 721.343904        | 1440.696515       | 720.851896        | 14 |
| 8  | 879.518596        | 440.262936        | 861.508031     | 431.257654       | D    | <b>1345.623016</b> | 673.315146      | 1328.596467    | 664.801872        | 1327.612451       | 664.309864        | 13 |
| 9  | 992.602660        | 496.804968        | 974.592095     | 487.799686       | L    | <b>1230.596073</b> | 615.801675      | 1213.569524    | 607.288400        | 1212.585508       | 606.796392        | 12 |
| 10 | 1093.650339       | 547.328808        | 1075.639774    | 538.323525       | T    | <b>1117.512009</b> | 559.259643      | 1100.485460    | 550.746368        | 1099.501444       | 550.254360        | 11 |
| 11 | 1208.677282       | 604.842279        | 1190.666717    | 595.836997       | D    | <b>1016.464330</b> | 508.735803      | 999.437781     | 500.222529        | <b>998.453765</b> | 499.730521        | 10 |
| 12 | 1309.724961       | 655.366119        | 1291.714396    | 646.360836       | T    | <b>901.437387</b>  | 451.222332      | 884.410838     | <b>442.709057</b> | 883.426822        | <b>442.217049</b> | 9  |
| 13 | 1366.746425       | 683.876851        | 1348.735860    | 674.871568       | G    | 800.389708         | 400.698492      | 783.363159     | 392.185218        | 782.379143        | 391.693210        | 8  |
| 14 | 1453.778453       | 727.392865        | 1435.767888    | 718.387582       | S    | 743.368244         | 372.187760      | 726.341695     | 363.674486        | 725.357679        | 363.182478        | 7  |
| 15 | 1590.837365       | 795.922321        | 1572.826800    | 786.917038       | H    | <b>656.336216</b>  | 328.671746      | 639.309667     | 320.158472        | 638.325651        | 319.666464        | 6  |
| 16 | 1719.879958       | 860.443617        | 1701.869393    | 851.438335       | E    | 519.277304         | 260.142290      | 502.250755     | 251.629016        | 501.266739        | 251.137008        | 5  |
| 17 | 1790.917072       | 895.962174        | 1772.906507    | 886.956892       | A    | 390.234711         | 195.620994      | 373.208162     | 187.107719        | 372.224146        | 186.615711        | 4  |
| 18 | 1861.954186       | 931.480731        | 1843.943621    | 922.475449       | A    | 319.197597         | 160.102437      | 302.171048     | 151.589162        | 301.187032        | 151.097154        | 3  |
| 19 | 1963.001865       | 982.004571        | 1944.991300    | 972.999288       | T    | 248.160483         | 124.583880      | 231.133934     | 116.070605        | 230.149918        | 115.578597        | 2  |
| 20 |                   |                   |                |                  | K    | 147.112804         | 74.060040       | 130.086255     | 65.546766         |                   |                   | 1  |

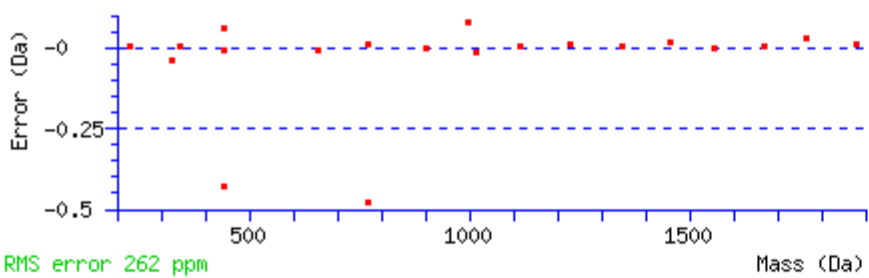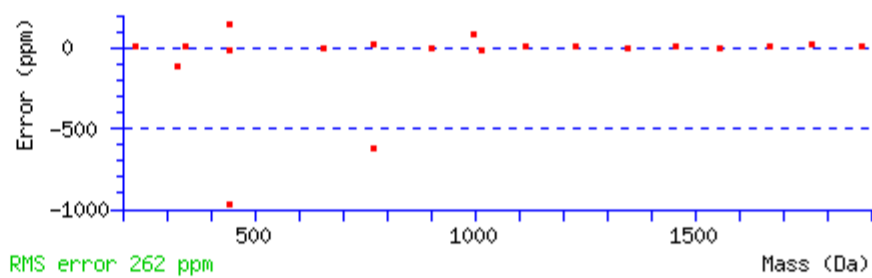

NCBI BLAST search of [DILVLPLDLTDTGSHEAATK](#)

(Parameters: blastp, nr protein database, expect=20000, no filter, PAM30)

Other BLAST [web gateways](#)

## All matches to this query

| Score | Mr(calc):   | Delta     | Sequence                             |
|-------|-------------|-----------|--------------------------------------|
| 67.3  | 2108.100113 | -0.005501 | <a href="#">DILVLPLDLTDTGSHEAATK</a> |
| 4.4   | 2108.090210 | 0.004402  | <a href="#">LAKQVGYENAGTVEFLVDR</a>  |
| 1.7   | 2108.076294 | 0.018318  | <a href="#">HSESFPSVNSRPNVILPGR</a>  |

# Mascot Search Results

## Peptide View

MS/MS Fragmentation of **FGQSGPIVLDDVR**

Found in **DMBT1\_HUMAN**, Deleted in malignant brain tumors 1 protein OS=Homo sapiens GN=DMBT1 PE=1 SV=2

Match to Query 43190: 1458.738388 from(730.376470,2+) rtinseconds(2687) index(34751)

Title: Locus:1.1.1.2446.42

Data file 2011-11-10 - TFD - EP 3-1.mgf

Click mouse within plot area to zoom in by factor of two about that point

Or, Plot from  to  Da

Label all possible matches  Label matches used for scoring

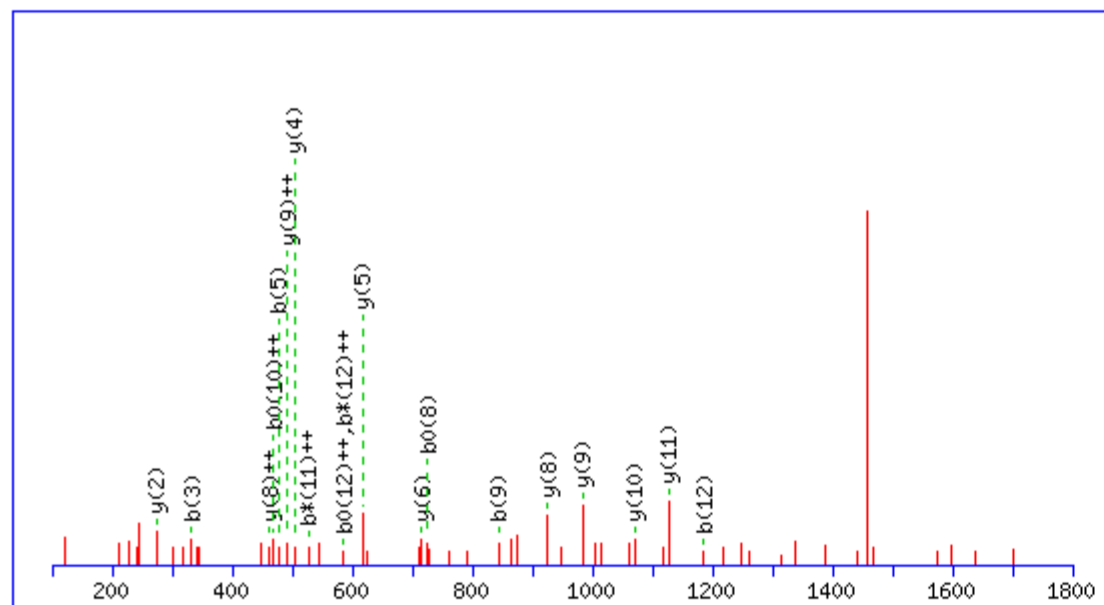

Monoisotopic mass of neutral peptide Mr(calc): 1458.746719

Fixed modifications: Propionamide (C) (apply to specified residues or termini only)

Ions Score: 30 Expect: 0.0032

Matches : 19/140 fragment ions using 51 most intense peaks ([help](#))

| #  | b                  | b <sup>++</sup> | b <sup>*</sup> | b <sup>*++</sup>  | b <sup>0</sup>    | b <sup>0++</sup>  | Seq. | y                  | y <sup>++</sup>   | y <sup>*</sup> | y <sup>*++</sup> | y <sup>0</sup> | y <sup>0++</sup> | #  |
|----|--------------------|-----------------|----------------|-------------------|-------------------|-------------------|------|--------------------|-------------------|----------------|------------------|----------------|------------------|----|
| 1  | 148.075690         | 74.541483       |                |                   |                   |                   | F    |                    |                   |                |                  |                |                  | 14 |
| 2  | 205.097154         | 103.052215      |                |                   |                   |                   | G    | 1312.685556        | 656.846416        | 1295.659007    | 648.333142       | 1294.674991    | 647.841134       | 13 |
| 3  | <b>333.155732</b>  | 167.081504      | 316.129183     | 158.568230        |                   |                   | Q    | 1255.664092        | 628.335684        | 1238.637543    | 619.822410       | 1237.653527    | 619.330402       | 12 |
| 4  | 390.177196         | 195.592236      | 373.150647     | 187.078961        |                   |                   | G    | <b>1127.605514</b> | 564.306395        | 1110.578965    | 555.793121       | 1109.594949    | 555.301113       | 11 |
| 5  | <b>477.209224</b>  | 239.108250      | 460.182675     | 230.594976        | 459.198659        | 230.102968        | S    | <b>1070.584050</b> | 535.795663        | 1053.557501    | 527.282389       | 1052.573485    | 526.790381       | 10 |
| 6  | 534.230688         | 267.618982      | 517.204139     | 259.105708        | 516.220123        | 258.613700        | G    | <b>983.552022</b>  | <b>492.279649</b> | 966.525473     | 483.766375       | 965.541457     | 483.274367       | 9  |
| 7  | 631.283452         | 316.145364      | 614.256903     | 307.632090        | 613.272887        | 307.140082        | P    | <b>926.530558</b>  | <b>463.768917</b> | 909.504009     | 455.255643       | 908.519993     | 454.763635       | 8  |
| 8  | 744.367516         | 372.687396      | 727.340967     | 364.174122        | <b>726.356951</b> | 363.682114        | I    | 829.477794         | 415.242535        | 812.451245     | 406.729261       | 811.467229     | 406.237253       | 7  |
| 9  | <b>843.435930</b>  | 422.221603      | 826.409381     | 413.708329        | 825.425365        | 413.216321        | V    | <b>716.393730</b>  | 358.700503        | 699.367181     | 350.187229       | 698.383165     | 349.695221       | 6  |
| 10 | 956.519994         | 478.763635      | 939.493445     | 470.250361        | 938.509429        | <b>469.758353</b> | L    | <b>617.325316</b>  | 309.166296        | 600.298767     | 300.653022       | 599.314751     | 300.161014       | 5  |
| 11 | 1071.546937        | 536.277107      | 1054.520388    | <b>527.763832</b> | 1053.536372       | 527.271824        | D    | <b>504.241252</b>  | 252.624264        | 487.214703     | 244.110990       | 486.230687     | 243.618982       | 4  |
| 12 | <b>1186.573880</b> | 593.790578      | 1169.547331    | <b>585.277304</b> | 1168.563315       | <b>584.785296</b> | D    | 389.214309         | 195.110793        | 372.187760     | 186.597518       | 371.203744     | 186.105510       | 3  |
| 13 | 1285.642294        | 643.324785      | 1268.615745    | 634.811511        | 1267.631729       | 634.319503        | V    | <b>274.187366</b>  | 137.597321        | 257.160817     | 129.084047       |                |                  | 2  |
| 14 |                    |                 |                |                   |                   |                   | R    | 175.118952         | 88.063114         | 158.092403     | 79.549839        |                |                  | 1  |

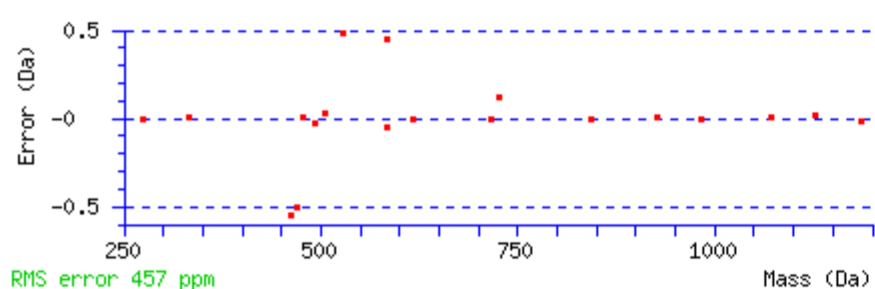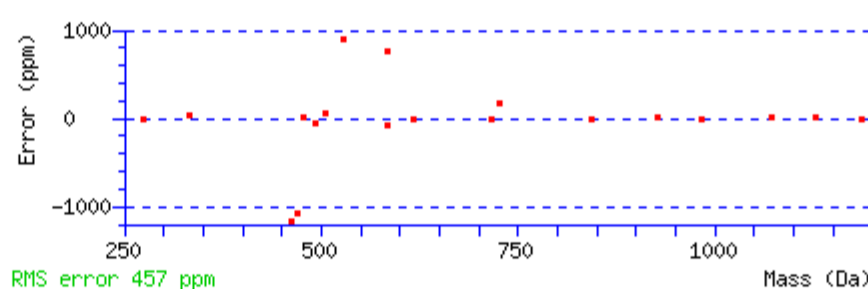

NCBI BLAST search of **FGQSGPIVLDDVR**

(Parameters: blastp, nr protein database, expect=20000, no filter, PAM30)

Other BLAST [web gateways](#)

All matches to this query

| Score | Mr(calc):   | Delta     | Sequence                      |
|-------|-------------|-----------|-------------------------------|
| 30.4  | 1458.746719 | -0.008331 | <a href="#">FGQSGPIVLDDVR</a> |
| 3.7   | 1458.746674 | -0.008286 | <a href="#">DPEFNPNLIRTK</a>  |

# **MATRIX** SCIENCE Mascot Search Results

## Peptide View

MS/MS Fragmentation of **NDTKSVLGR**

Found in **DNS2B\_HUMAN**, Deoxyribonuclease-2-beta OS=Homo sapiens GN=DNASE2B PE=2 SV=1

Match to Query 246806: 988.532128 from(495.273340,2+) rtinseconds(2246) index(267274)

Title: Locus:1.1.1.1305.13

Data file C:\Program Files (x86)\Matrix Science\Mascot Daemon\mgf3 TFD - Epitel - R2\mascot\_daemon\_merge.mgf

Click mouse within plot area to zoom in by factor of two about that point

Or, Plot from  to  Da

Label all possible matches  Label matches used for scoring

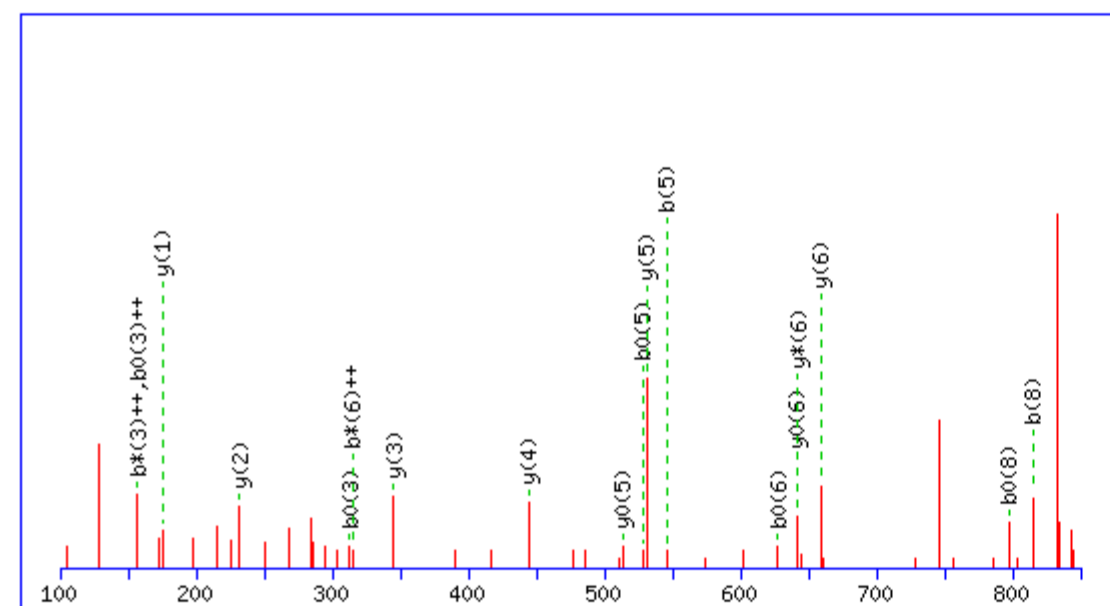

Monoisotopic mass of neutral peptide Mr(calc): 988.530151

Fixed modifications: Carbamidomethyl (C) (apply to specified residues or termini only)

Ions Score: 37 Expect: 0.0033

Matches : 18/86 fragment ions using 32 most intense peaks ([help](#))

| # | b          | b <sup>++</sup> | b <sup>*</sup> | b <sup>*++</sup> | b <sup>0</sup> | b <sup>0++</sup> | Seq. | y          | y <sup>++</sup> | y <sup>*</sup> | y <sup>*++</sup> | y <sup>0</sup> | y <sup>0++</sup> | # |
|---|------------|-----------------|----------------|------------------|----------------|------------------|------|------------|-----------------|----------------|------------------|----------------|------------------|---|
| 1 | 115.050203 | 58.028740       | 98.023654      | 49.515465        |                |                  | N    |            |                 |                |                  |                |                  | 9 |
| 2 | 230.077146 | 115.542211      | 213.050597     | 107.028937       | 212.066581     | 106.536928       | D    | 875.494507 | 438.250892      | 858.467958     | 429.737617       | 857.483942     | 429.245609       | 8 |
| 3 | 331.124825 | 166.066050      | 314.098276     | 157.552776       | 313.114260     | 157.060768       | T    | 760.467564 | 380.737420      | 743.441015     | 372.224146       | 742.456999     | 371.732138       | 7 |
| 4 | 459.219788 | 230.113532      | 442.193239     | 221.600258       | 441.209223     | 221.108250       | K    | 659.419885 | 330.213581      | 642.393336     | 321.700306       | 641.409320     | 321.208298       | 6 |
| 5 | 546.251816 | 273.629546      | 529.225267     | 265.116272       | 528.241251     | 264.624264       | S    | 531.324922 | 266.166099      | 514.298373     | 257.652825       | 513.314357     | 257.160817       | 5 |
| 6 | 645.320230 | 323.163753      | 628.293681     | 314.650479       | 627.309665     | 314.158471       | V    | 444.292894 | 222.650085      | 427.266345     | 214.136810       |                |                  | 4 |
| 7 | 758.404294 | 379.705785      | 741.377745     | 371.192511       | 740.393729     | 370.700503       | L    | 345.224480 | 173.115878      | 328.197931     | 164.602603       |                |                  | 3 |
| 8 | 815.425758 | 408.216517      | 798.399209     | 399.703243       | 797.415193     | 399.211235       | G    | 232.140416 | 116.573846      | 215.113867     | 108.060571       |                |                  | 2 |
| 9 |            |                 |                |                  |                |                  | R    | 175.118952 | 88.063114       | 158.092403     | 79.549839        |                |                  | 1 |

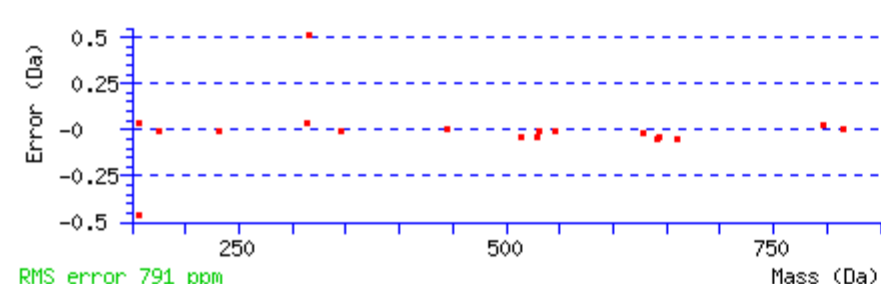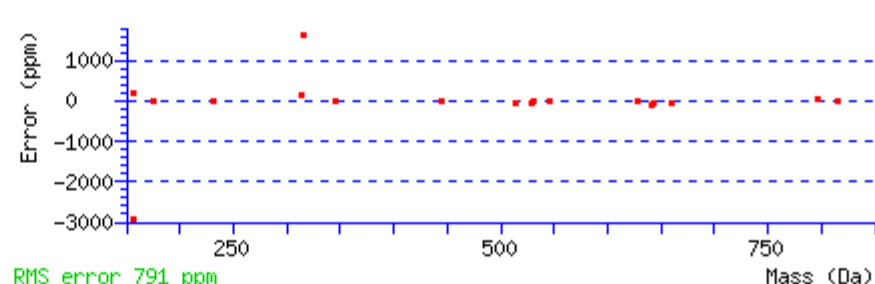

NCBI BLAST search of **NDTKSVLGR**

(Parameters: blastp, nr protein database, expect=20000, no filter, PAM30)

Other BLAST [web gateways](#)

## All matches to this query

| Score | Mr(calc):  | Delta     | Sequence                     |
|-------|------------|-----------|------------------------------|
| 37.4  | 988.530151 | 0.001977  | <a href="#">NDTKSVLGR</a>    |
| 26.9  | 988.523621 | 0.008507  | <a href="#">CALVSRQR</a>     |
| 11.7  | 988.523621 | 0.008507  | <a href="#">GCLIRNTR</a>     |
| 11.5  | 988.530151 | 0.001977  | <a href="#">SSVAAGGQK GK</a> |
| 7.2   | 988.530151 | 0.001977  | <a href="#">QTDLKATGR</a>    |
| 6.9   | 988.530151 | 0.001977  | <a href="#">NTVTQALSR</a>    |
| 6.1   | 988.541382 | -0.009254 | <a href="#">VSGRPSSRK</a>    |
| 5.5   | 988.530136 | 0.001992  | <a href="#">TENQTIKR</a>     |
| 5.3   | 988.530121 | 0.002007  | <a href="#">SEISELRR</a>     |
| 4.5   | 988.523621 | 0.008507  | <a href="#">RAICVNTR</a>     |

Mascot: <http://www.matrixscience.com/>

**MATRIX SCIENCE Mascot Search Results**

**Peptide View**

MS/MS Fragmentation of **FGTVLTEHVAAAELGAR**

Found in **RCL\_HUMAN**, Deoxyribonucleoside 5'-monophosphate N-glycosidase OS=Homo sapiens GN=RCL PE=1 SV=1

Match to Query 52996: 1740.907752 from(581.309860,3+) rtinseconds(2723) index(34965)

Title: Locus:1.1.1.2357.26

Data file 2011-11-14 - TFD - EP 8-5.mgf

Click mouse within plot area to zoom in by factor of two about that point

Or, Plot from  to  Da

Label all possible matches  Label matches used for scoring

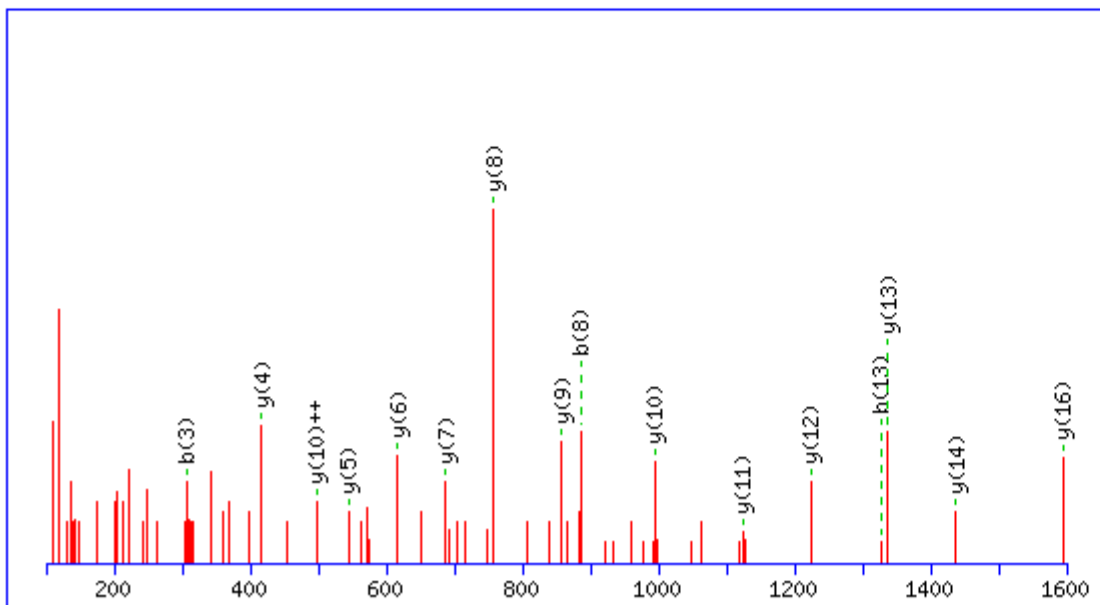

Monoisotopic mass of neutral peptide Mr(calc): 1740.915878

Fixed modifications: Propionamide (C) (apply to specified residues or termini only)

Ions Score: 87 Expect: 2.1e-008

Matches : 16/148 fragment ions using 27 most intense peaks [\(help\)](#)

| #  | b           | b <sup>++</sup> | b <sup>0</sup> | b <sup>0++</sup> | Seq. | y           | y <sup>++</sup> | y <sup>*</sup> | y <sup>+++</sup> | y <sup>0</sup> | y <sup>0++</sup> | #  |
|----|-------------|-----------------|----------------|------------------|------|-------------|-----------------|----------------|------------------|----------------|------------------|----|
| 1  | 148.075690  | 74.541483       |                |                  | F    |             |                 |                |                  |                |                  | 17 |
| 2  | 205.097154  | 103.052215      |                |                  | G    | 1594.854748 | 797.931012      | 1577.828199    | 789.417737       | 1576.844183    | 788.925729       | 16 |
| 3  | 306.144833  | 153.576055      | 288.134268     | 144.570772       | T    | 1537.833284 | 769.420280      | 1520.806735    | 760.907005       | 1519.822719    | 760.414997       | 15 |
| 4  | 405.213247  | 203.110262      | 387.202682     | 194.104979       | V    | 1436.785605 | 718.896440      | 1419.759056    | 710.383166       | 1418.775040    | 709.891158       | 14 |
| 5  | 518.297311  | 259.652294      | 500.286746     | 250.647011       | L    | 1337.717191 | 669.362233      | 1320.690642    | 660.848959       | 1319.706626    | 660.356951       | 13 |
| 6  | 619.344990  | 310.176133      | 601.334425     | 301.170851       | T    | 1224.633127 | 612.820201      | 1207.606578    | 604.306927       | 1206.622562    | 603.814919       | 12 |
| 7  | 748.387583  | 374.697430      | 730.377018     | 365.692147       | E    | 1123.585448 | 562.296362      | 1106.558899    | 553.783087       | 1105.574883    | 553.291079       | 11 |
| 8  | 885.446495  | 443.226886      | 867.435930     | 434.221603       | H    | 994.542855  | 497.775065      | 977.516306     | 489.261791       | 976.532290     | 488.769783       | 10 |
| 9  | 984.514909  | 492.761093      | 966.504344     | 483.755810       | V    | 857.483943  | 429.245609      | 840.457394     | 420.732335       | 839.473378     | 420.240327       | 9  |
| 10 | 1055.552023 | 528.279650      | 1037.541458    | 519.274367       | A    | 758.415529  | 379.711402      | 741.388980     | 371.198128       | 740.404964     | 370.706120       | 8  |
| 11 | 1126.589137 | 563.798206      | 1108.578572    | 554.792924       | A    | 687.378415  | 344.192845      | 670.351866     | 335.679571       | 669.367850     | 335.187563       | 7  |
| 12 | 1197.626251 | 599.316763      | 1179.615686    | 590.311481       | A    | 616.341301  | 308.674288      | 599.314752     | 300.161014       | 598.330736     | 299.669006       | 6  |
| 13 | 1326.668844 | 663.838060      | 1308.658279    | 654.832778       | E    | 545.304187  | 273.155732      | 528.277638     | 264.642457       | 527.293622     | 264.150449       | 5  |
| 14 | 1439.752908 | 720.380092      | 1421.742343    | 711.374809       | L    | 416.261594  | 208.634435      | 399.235045     | 200.121160       |                |                  | 4  |
| 15 | 1496.774372 | 748.890824      | 1478.763807    | 739.885541       | G    | 303.177530  | 152.092403      | 286.150981     | 143.579128       |                |                  | 3  |
| 16 | 1567.811486 | 784.409381      | 1549.800921    | 775.404098       | A    | 246.156066  | 123.581671      | 229.129517     | 115.068396       |                |                  | 2  |
| 17 |             |                 |                |                  | R    | 175.118952  | 88.063114       | 158.092403     | 79.549839        |                |                  | 1  |

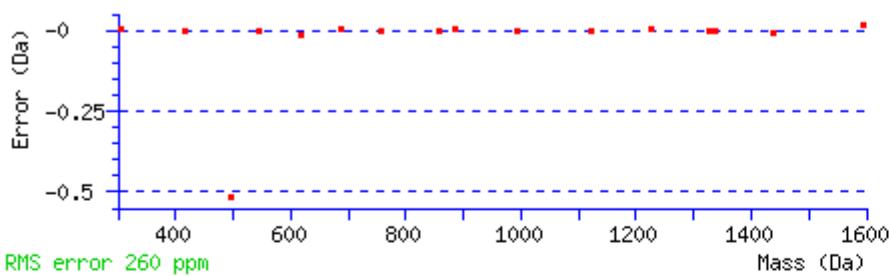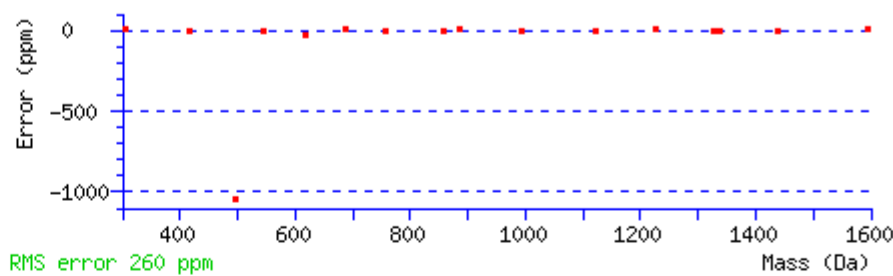

NCBI BLAST search of [FGTVLTEHVAAAELGAR](#)

(Parameters: blastp, nr protein database, expect=20000, no filter, PAM30)

Other BLAST [web gateways](#)

**All matches to this query**

| Score | Mr(calc):   | Delta     | Sequence                          |
|-------|-------------|-----------|-----------------------------------|
| 87.0  | 1740.915878 | -0.008126 | <a href="#">FGTVLTEHVAAAELGAR</a> |



**MATRIX SCIENCE Mascot Search Results**

**Peptide View**

MS/MS Fragmentation of **GNVGVVLFNFGK**

Found in **DUT\_HUMAN**, Deoxyuridine 5'-triphosphate nucleotidohydrolase, mitochondrial OS=Homo sapiens GN=DUT PE=1 SV=4

Match to Query 31769: 1249.681068 from(625.847810,2+) rtinseconds(3426) index(45171)  
 Title: Locus:1.1.1.2594.14  
 Data file 2011-11-13 - TFD - EP 7-6.mgf

Click mouse within plot area to zoom in by factor of two about that point

Or,   to  Da

Label all possible matches  Label matches used for scoring

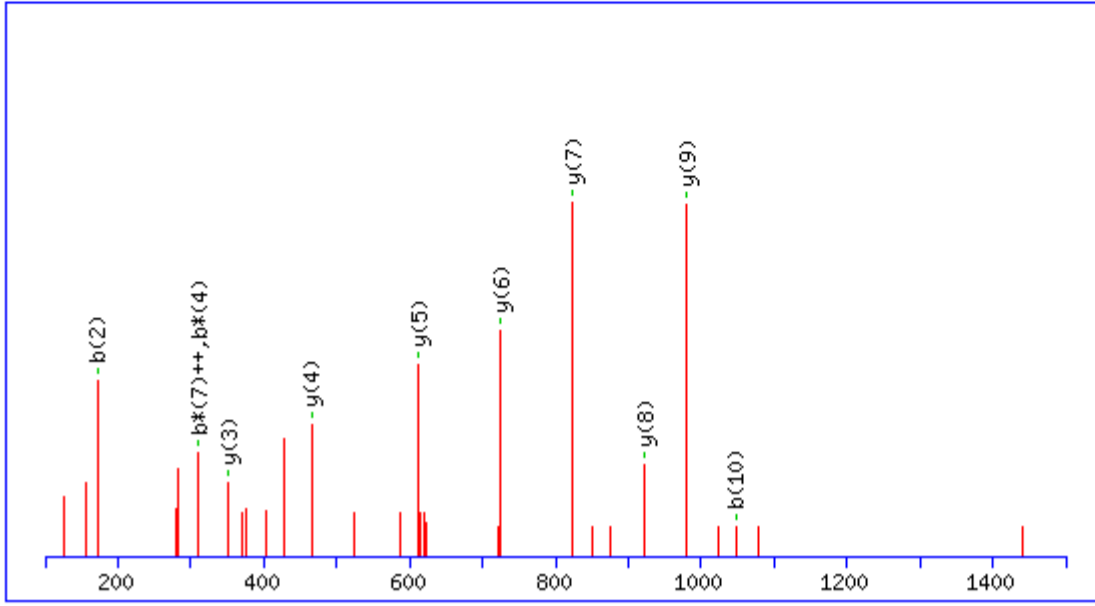

Monoisotopic mass of neutral peptide Mr(calc): 1249.681931  
 Fixed modifications: Propionamide (C) (apply to specified residues or termini only)  
 Ions Score: 75 Expect: 2.6e-007  
 Matches : 11/86 fragment ions using 10 most intense peaks ([help](#))

| #  | b                  | b <sup>++</sup> | b <sup>*</sup>    | b <sup>*++</sup>  | Seq.     | y                 | y <sup>++</sup> | y <sup>*</sup> | y <sup>*++</sup> | #  |
|----|--------------------|-----------------|-------------------|-------------------|----------|-------------------|-----------------|----------------|------------------|----|
| 1  | 58.028740          | 29.518008       |                   |                   | <b>G</b> |                   |                 |                |                  | 12 |
| 2  | <b>172.071667</b>  | 86.539471       | 155.045118        | 78.026197         | <b>N</b> | 1193.667720       | 597.337498      | 1176.641171    | 588.824224       | 11 |
| 3  | 271.140081         | 136.073679      | 254.113532        | 127.560404        | <b>V</b> | 1079.624793       | 540.316035      | 1062.598244    | 531.802760       | 10 |
| 4  | 328.161545         | 164.584410      | <b>311.134996</b> | 156.071136        | <b>G</b> | <b>980.556379</b> | 490.781828      | 963.529830     | 482.268553       | 9  |
| 5  | 427.229959         | 214.118618      | 410.203410        | 205.605343        | <b>V</b> | <b>923.534915</b> | 462.271096      | 906.508366     | 453.757821       | 8  |
| 6  | 526.298373         | 263.652825      | 509.271824        | 255.139550        | <b>V</b> | <b>824.466501</b> | 412.736889      | 807.439952     | 404.223614       | 7  |
| 7  | 639.382437         | 320.194857      | 622.355888        | <b>311.681582</b> | <b>L</b> | <b>725.398087</b> | 363.202682      | 708.371538     | 354.689407       | 6  |
| 8  | 786.450851         | 393.729064      | 769.424302        | 385.215789        | <b>F</b> | <b>612.314023</b> | 306.660650      | 595.287474     | 298.147375       | 5  |
| 9  | 900.493778         | 450.750527      | 883.467229        | 442.237253        | <b>N</b> | <b>465.245609</b> | 233.126442      | 448.219060     | 224.613168       | 4  |
| 10 | <b>1047.562192</b> | 524.284734      | 1030.535643       | 515.771460        | <b>F</b> | <b>351.202682</b> | 176.104979      | 334.176133     | 167.591704       | 3  |
| 11 | 1104.583656        | 552.795466      | 1087.557107       | 544.282192        | <b>G</b> | 204.134268        | 102.570772      | 187.107719     | 94.057497        | 2  |
| 12 |                    |                 |                   |                   | <b>K</b> | 147.112804        | 74.060040       | 130.086255     | 65.546765        | 1  |

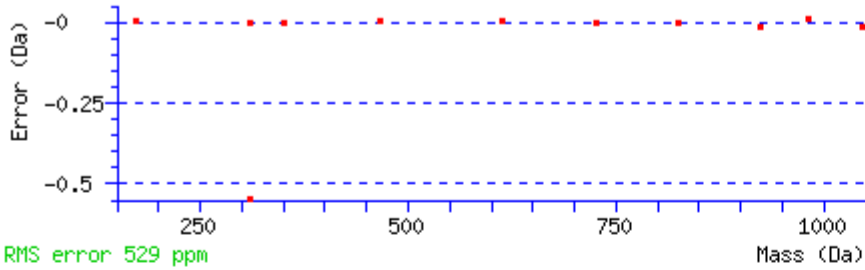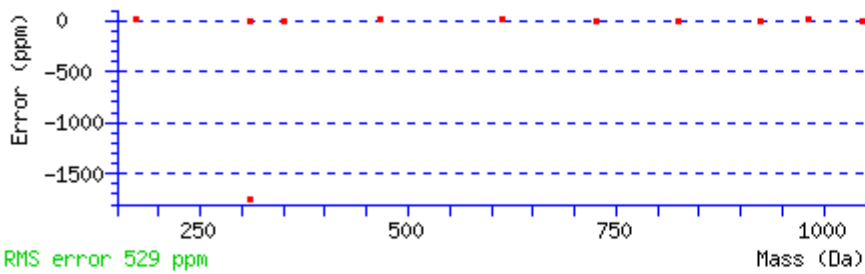

NCBI BLAST search of [GNVGVVLFNFGK](#)  
 (Parameters: blastp, nr protein database, expect=20000, no filter, PAM30)  
 Other BLAST [web gateways](#)

**All matches to this query**

| Score | Mr(calc):   | Delta     | Sequence                      |
|-------|-------------|-----------|-------------------------------|
| 74.6  | 1249.681931 | -0.000863 | <a href="#">GNVGVVLFNFGK</a>  |
| 6.9   | 1249.677902 | 0.003166  | <a href="#">GPPGVRGDPGTLK</a> |
| 0.9   | 1249.689087 | -0.008019 | <a href="#">NPSKPPDLRAR</a>   |

# MASCOT Search Results

## Peptide View

MS/MS Fragmentation of **NFLSTPQFLYR**

Found in **DERL1\_HUMAN**, Derlin-1 OS=Homo sapiens GN=DERL1 PE=1 SV=1

Match to Query 40147: 1384.720088 from(693.367320,2+) rtinseconds(3352) index(44378)

Title: Locus:1.1.1.2548.39

Data file 2011-11-14 - TFD - EP 8-6.mgf

Click mouse within plot area to zoom in by factor of two about that point

Or, Plot from  to  Da

Label all possible matches  Label matches used for scoring

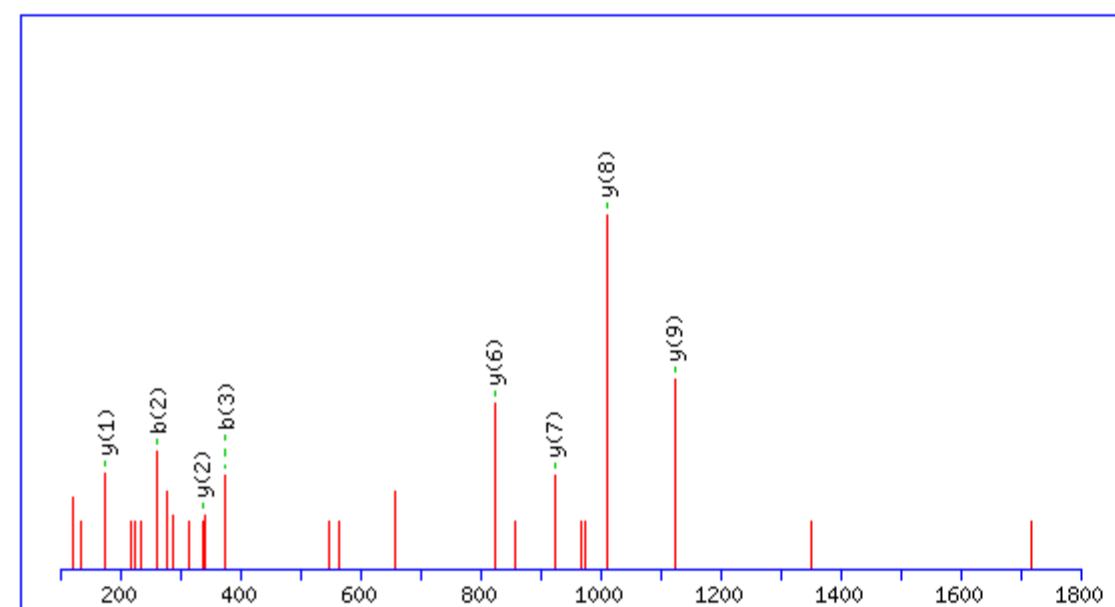

Monoisotopic mass of neutral peptide Mr(calc): 1384.713928

Fixed modifications: Propionamide (C) (apply to specified residues or termini only)

Ions Score: 33 Expect: 0.0067

Matches : 8/102 fragment ions using 19 most intense peaks [\(help\)](#)

| #  | b                 | b <sup>++</sup> | b <sup>+</sup> | b <sup>+++</sup> | b <sup>0</sup> | b <sup>0++</sup> | Seq. | y                  | y <sup>++</sup> | y <sup>+</sup> | y <sup>+++</sup> | y <sup>0</sup> | y <sup>0++</sup> | #  |
|----|-------------------|-----------------|----------------|------------------|----------------|------------------|------|--------------------|-----------------|----------------|------------------|----------------|------------------|----|
| 1  | 115.050203        | 58.028740       | 98.023654      | 49.515465        |                |                  | N    |                    |                 |                |                  |                |                  | 11 |
| 2  | <b>262.118617</b> | 131.562946      | 245.092068     | 123.049672       |                |                  | F    | 1271.678286        | 636.342781      | 1254.651737    | 627.829507       | 1253.667721    | 627.337499       | 10 |
| 3  | <b>375.202681</b> | 188.104978      | 358.176132     | 179.591704       |                |                  | L    | <b>1124.609872</b> | 562.808574      | 1107.583323    | 554.295300       | 1106.599307    | 553.803292       | 9  |
| 4  | 462.234709        | 231.620993      | 445.208160     | 223.107718       | 444.224144     | 222.615710       | S    | <b>1011.525808</b> | 506.266542      | 994.499259     | 497.753268       | 993.515243     | 497.261260       | 8  |
| 5  | 563.282388        | 282.144832      | 546.255839     | 273.631558       | 545.271823     | 273.139550       | T    | <b>924.493780</b>  | 462.750528      | 907.467231     | 454.237254       | 906.483215     | 453.745246       | 7  |
| 6  | 660.335152        | 330.671214      | 643.308603     | 322.157940       | 642.324587     | 321.665932       | P    | <b>823.446101</b>  | 412.226689      | 806.419552     | 403.713414       |                |                  | 6  |
| 7  | 788.393730        | 394.700503      | 771.367181     | 386.187229       | 770.383165     | 385.695221       | Q    | 726.393337         | 363.700307      | 709.366788     | 355.187032       |                |                  | 5  |
| 8  | 935.462144        | 468.234710      | 918.435595     | 459.721436       | 917.451579     | 459.229428       | F    | 598.334759         | 299.671018      | 581.308210     | 291.157743       |                |                  | 4  |
| 9  | 1048.546208       | 524.776742      | 1031.519659    | 516.263468       | 1030.535643    | 515.771459       | L    | 451.266345         | 226.136810      | 434.239796     | 217.623536       |                |                  | 3  |
| 10 | 1211.609537       | 606.308407      | 1194.582988    | 597.795132       | 1193.598972    | 597.303124       | Y    | <b>338.182281</b>  | 169.594778      | 321.155732     | 161.081504       |                |                  | 2  |
| 11 |                   |                 |                |                  |                |                  | R    | <b>175.118952</b>  | 88.063114       | 158.092403     | 79.549839        |                |                  | 1  |

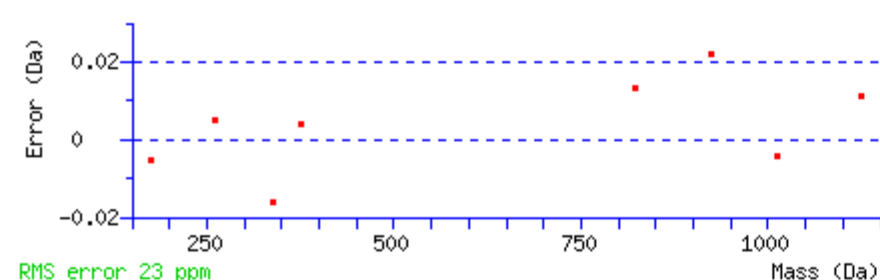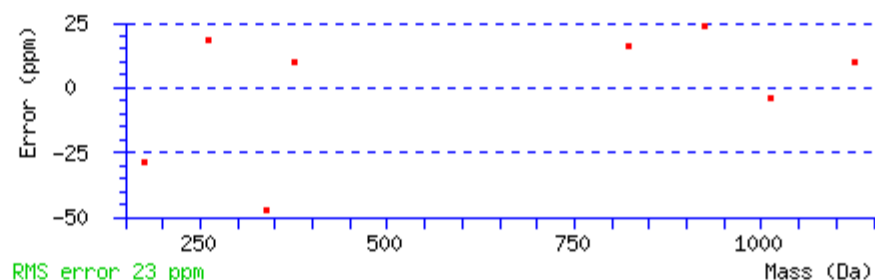

NCBI BLAST search of **NFLSTPQFLYR**

(Parameters: blastp, nr protein database, expect=20000, no filter, PAM30)

Other BLAST [web gateways](#)

## All matches to this query

| Score | Mr(calc):   | Delta     | Sequence                     |
|-------|-------------|-----------|------------------------------|
| 32.7  | 1384.713928 | 0.006160  | <a href="#">NFLSTPQFLYR</a>  |
| 21.0  | 1384.709900 | 0.010188  | <a href="#">ASSRSVEFFLSR</a> |
| 18.3  | 1384.721130 | -0.001042 | <a href="#">VHAEAFSRPLSR</a> |
| 18.2  | 1384.713272 | 0.006816  | <a href="#">CSLPVPREPLR</a>  |
| 18.2  | 1384.732361 | -0.012273 | <a href="#">SSSLRPGPSRWR</a> |
| 10.8  | 1384.713928 | 0.006160  | <a href="#">RPYNFFGILDK</a>  |
| 9.8   | 1384.724487 | -0.004399 | <a href="#">MSRSPLNPSQLR</a> |
| 8.7   | 1384.713272 | 0.006816  | <a href="#">MARTAPVEPPLR</a> |
| 8.7   | 1384.713272 | 0.006816  | <a href="#">MARTAPVEPPLR</a> |
| 7.5   | 1384.713272 | 0.006816  | <a href="#">MARTAPVEPPLR</a> |

# Mascot Search Results

## Peptide View

MS/MS Fragmentation of **IQLLDLPGIIEGAK**

Found in **DRG1\_HUMAN**, Developmentally-regulated GTP-binding protein 1 OS=Homo sapiens GN=DRG1 PE=1 SV=1

Match to Query 41655: 1478.860148 from(740.437350,2+) rtinseconds(3958) index(59487)

Title: Locus:1.1.1.1879.29

Data file 2012-01-27 - TFD - Epitel - IEC - 10ul - 2.mgf

Click mouse within plot area to zoom in by factor of two about that point

Or, Plot from  to  Da

Label all possible matches  Label matches used for scoring

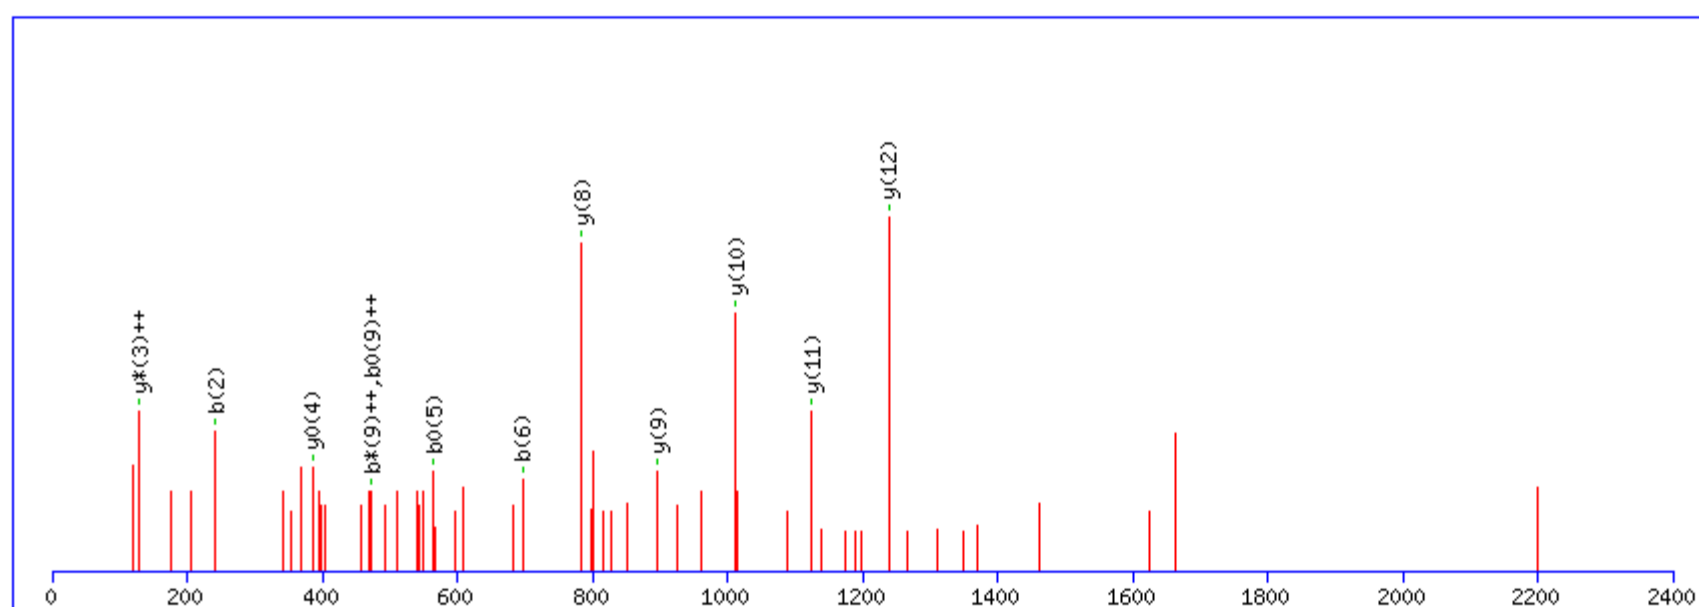

Monoisotopic mass of neutral peptide Mr(calc): 1478.870804

Fixed modifications: Carbamidomethyl (C) (apply to specified residues or termini only)

Ions Score: 38 Expect: 0.00066

Matches : 12/140 fragment ions using 14 most intense peaks [\(help\)](#)

| #  | b                 | b <sup>++</sup> | b <sup>*</sup> | b <sup>*++</sup>  | b <sup>0</sup>    | b <sup>0++</sup>  | Seq. | y                  | y <sup>++</sup> | y <sup>*</sup> | y <sup>*++</sup>  | y <sup>0</sup>    | y <sup>0++</sup> | #  |
|----|-------------------|-----------------|----------------|-------------------|-------------------|-------------------|------|--------------------|-----------------|----------------|-------------------|-------------------|------------------|----|
| 1  | 114.091340        | 57.549308       |                |                   |                   |                   | I    |                    |                 |                |                   |                   |                  | 14 |
| 2  | <b>242.149918</b> | 121.578597      | 225.123369     | 113.065323        |                   |                   | Q    | 1366.794044        | 683.900660      | 1349.767495    | 675.387386        | 1348.783479       | 674.895378       | 13 |
| 3  | 355.233982        | 178.120629      | 338.207433     | 169.607355        |                   |                   | L    | <b>1238.735466</b> | 619.871371      | 1221.708917    | 611.358096        | 1220.724901       | 610.866088       | 12 |
| 4  | 468.318046        | 234.662661      | 451.291497     | 226.149387        |                   |                   | L    | <b>1125.651402</b> | 563.329339      | 1108.624853    | 554.816064        | 1107.640837       | 554.324056       | 11 |
| 5  | 583.344989        | 292.176133      | 566.318440     | 283.662858        | <b>565.334424</b> | 283.170850        | D    | <b>1012.567338</b> | 506.787307      | 995.540789     | 498.274032        | 994.556773        | 497.782024       | 10 |
| 6  | <b>696.429053</b> | 348.718165      | 679.402504     | 340.204890        | 678.418488        | 339.712882        | L    | <b>897.540395</b>  | 449.273835      | 880.513846     | 440.760561        | 879.529830        | 440.268553       | 9  |
| 7  | 793.481817        | 397.244547      | 776.455268     | 388.731272        | <b>775.471252</b> | 388.239264        | P    | <b>784.456331</b>  | 392.731803      | 767.429782     | 384.218529        | 766.445766        | 383.726521       | 8  |
| 8  | 850.503281        | 425.755279      | 833.476732     | 417.242004        | 832.492716        | 416.749996        | G    | 687.403567         | 344.205421      | 670.377018     | 335.692147        | 669.393002        | 335.200139       | 7  |
| 9  | 963.587345        | 482.297311      | 946.560796     | <b>473.784036</b> | 945.576780        | <b>473.292028</b> | I    | 630.382103         | 315.694689      | 613.355554     | 307.181415        | 612.371538        | 306.689407       | 6  |
| 10 | 1076.671409       | 538.839343      | 1059.644860    | 530.326068        | 1058.660844       | 529.834060        | I    | 517.298039         | 259.152657      | 500.271490     | 250.639383        | 499.287474        | 250.147375       | 5  |
| 11 | 1205.714002       | 603.360639      | 1188.687453    | 594.847365        | 1187.703437       | 594.355356        | E    | 404.213975         | 202.610625      | 387.187426     | 194.097351        | <b>386.203410</b> | 193.605343       | 4  |
| 12 | 1262.735466       | 631.871371      | 1245.708917    | 623.358096        | 1244.724901       | 622.866088        | G    | 275.171382         | 138.089329      | 258.144833     | <b>129.576054</b> |                   |                  | 3  |
| 13 | 1333.772580       | 667.389928      | 1316.746031    | 658.876653        | 1315.762015       | 658.384645        | A    | 218.149918         | 109.578597      | 201.123369     | 101.065322        |                   |                  | 2  |
| 14 |                   |                 |                |                   |                   |                   | K    | 147.112804         | 74.060040       | 130.086255     | 65.546765         |                   |                  | 1  |

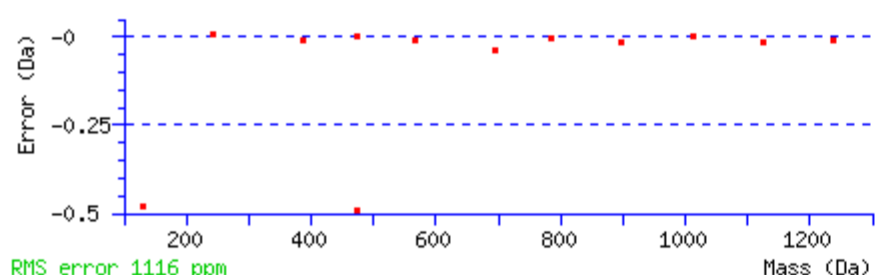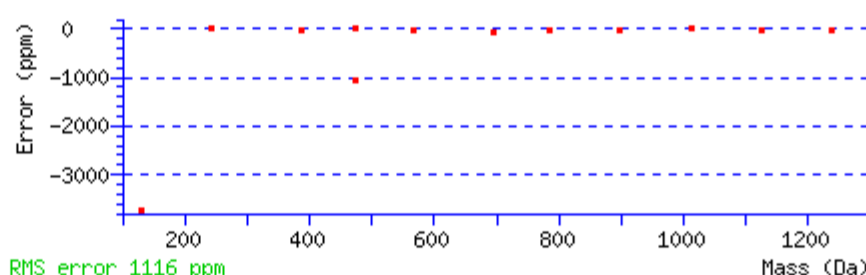

NCBI BLAST search of **IQLLDLPGIIEGAK**

(Parameters: blastp, nr protein database, expect=20000, no filter, PAM30)

Other BLAST [web gateways](#)

All matches to this query

| Score | Mr(calc):   | Delta     | Sequence                       |
|-------|-------------|-----------|--------------------------------|
| 37.6  | 1478.870804 | -0.010656 | <a href="#">IQLLDLPGIIEGAK</a> |

Mascot: <http://www.matrixscience.com/>

**Peptide View**

MS/MS Fragmentation of **GANIQLLDLPGIIEGAAQ GK**  
 Found in **DRG2\_HUMAN**, Developmentally-regulated GTP-binding protein 2 OS=Homo sapiens GN=DRG2 PE=1 SV=1

Match to Query 64803: 1977.093102 from(660.038310,3+) rtinseconds(4374) index(66801)  
 Title: Locus:1.1.1.3040.18  
 Data file 2011-11-14 - TFD - EP 8-4.mgf

Click mouse within plot area to zoom in by factor of two about that point

Or, Plot from  to  Da   
 Label all possible matches  Label matches used for scoring

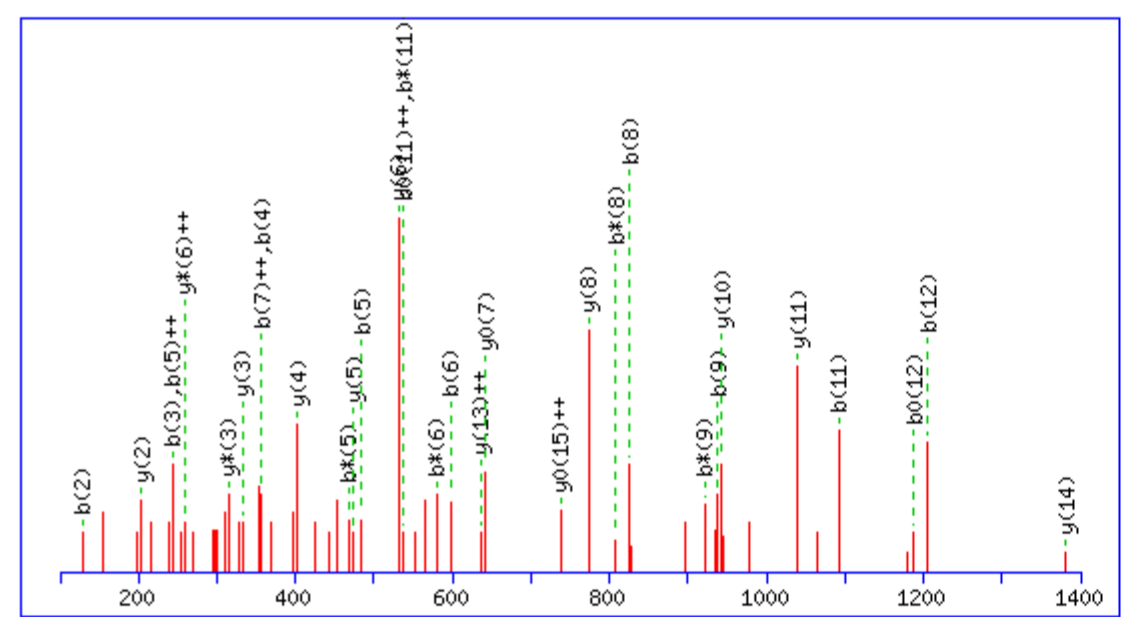

Monoisotopic mass of neutral peptide Mr(calc): 1977.089462  
 Fixed modifications: Propionamide (C) (apply to specified residues or termini only)  
 Ions Score: 65 Expect: 1.3e-006  
 Matches : 32/198 fragment ions using 46 most intense peaks [\(help\)](#)

| #  | b                  | b <sup>++</sup>   | b <sup>*</sup>    | b <sup>*++</sup>  | b <sup>0</sup>     | b <sup>0++</sup>  | Seq. | y                  | y <sup>++</sup>   | y <sup>*</sup>    | y <sup>*++</sup>  | y <sup>0</sup>    | y <sup>0++</sup>  | #  |
|----|--------------------|-------------------|-------------------|-------------------|--------------------|-------------------|------|--------------------|-------------------|-------------------|-------------------|-------------------|-------------------|----|
| 1  | 58.028740          | 29.518008         |                   |                   |                    |                   | G    |                    |                   |                   |                   |                   |                   | 20 |
| 2  | <b>129.065854</b>  | 65.036565         |                   |                   |                    |                   | A    | 1921.075305        | 961.041290        | 1904.048756       | 952.528016        | 1903.064740       | 952.036008        | 19 |
| 3  | <b>243.108781</b>  | 122.058029        | 226.082232        | 113.544754        |                    |                   | N    | 1850.038191        | 925.522733        | 1833.011642       | 917.009459        | 1832.027626       | 916.517451        | 18 |
| 4  | <b>356.192845</b>  | 178.600061        | 339.166296        | 170.086786        |                    |                   | I    | 1735.995264        | 868.501270        | 1718.968715       | 859.987995        | 1717.984699       | 859.495987        | 17 |
| 5  | <b>484.251423</b>  | <b>242.629350</b> | <b>467.224874</b> | 234.116075        |                    |                   | Q    | 1622.911200        | 811.959238        | 1605.884651       | 803.445963        | 1604.900635       | 802.953955        | 16 |
| 6  | <b>597.335487</b>  | 299.171382        | <b>580.308938</b> | 290.658107        |                    |                   | L    | 1494.852622        | 747.929949        | 1477.826073       | 739.416674        | 1476.842057       | <b>738.924666</b> | 15 |
| 7  | 710.419551         | <b>355.713414</b> | 693.393002        | 347.200139        |                    |                   | L    | <b>1381.768558</b> | 691.387917        | 1364.742009       | 682.874642        | 1363.757993       | 682.382634        | 14 |
| 8  | <b>825.446494</b>  | 413.226885        | <b>808.419945</b> | 404.713611        | 807.435929         | 404.221603        | D    | 1268.684494        | <b>634.845885</b> | 1251.657945       | 626.332610        | 1250.673929       | 625.840602        | 13 |
| 9  | <b>938.530558</b>  | 469.768917        | <b>921.504009</b> | 461.255643        | 920.519993         | 460.763635        | L    | 1153.657551        | 577.332413        | 1136.631002       | 568.819139        | 1135.646986       | 568.327131        | 12 |
| 10 | 1035.583322        | 518.295299        | 1018.556773       | 509.782024        | 1017.572757        | 509.290016        | P    | <b>1040.573487</b> | 520.790381        | 1023.546938       | 512.277107        | 1022.562922       | 511.785099        | 11 |
| 11 | <b>1092.604786</b> | 546.806031        | 1075.578237       | <b>538.292757</b> | 1074.594221        | <b>537.800748</b> | G    | <b>943.520723</b>  | 472.263999        | 926.494174        | 463.750725        | 925.510158        | 463.258717        | 10 |
| 12 | <b>1205.688850</b> | 603.348063        | 1188.662301       | 594.834788        | <b>1187.678285</b> | 594.342780        | I    | 886.499259         | 443.753267        | 869.472710        | 435.239993        | 868.488694        | 434.747985        | 9  |
| 13 | 1318.772914        | 659.890095        | 1301.746365       | 651.376820        | 1300.762349        | 650.884812        | I    | <b>773.415195</b>  | 387.211235        | 756.388646        | 378.697961        | 755.404630        | 378.205953        | 8  |
| 14 | 1447.815507        | 724.411391        | 1430.788958       | 715.898117        | 1429.804942        | 715.406109        | E    | 660.331131         | 330.669203        | 643.304582        | 322.155929        | <b>642.320566</b> | 321.663921        | 7  |
| 15 | 1504.836971        | 752.922123        | 1487.810422       | 744.408849        | 1486.826406        | 743.916841        | G    | <b>531.288538</b>  | 266.147907        | 514.261989        | <b>257.634633</b> |                   |                   | 6  |
| 16 | 1575.874085        | 788.440680        | 1558.847536       | 779.927406        | 1557.863520        | 779.435398        | A    | <b>474.267074</b>  | 237.637175        | 457.240525        | 229.123900        |                   |                   | 5  |
| 17 | 1646.911199        | 823.959237        | 1629.884650       | 815.445963        | 1628.900634        | 814.953955        | A    | <b>403.229960</b>  | 202.118618        | 386.203411        | 193.605344        |                   |                   | 4  |
| 18 | 1774.969777        | 887.988526        | 1757.943228       | 879.475252        | 1756.959212        | 878.983244        | Q    | <b>332.192846</b>  | 166.600061        | <b>315.166297</b> | 158.086787        |                   |                   | 3  |
| 19 | 1831.991241        | 916.499258        | 1814.964692       | 907.985984        | 1813.980676        | 907.493976        | G    | <b>204.134268</b>  | 102.570772        | 187.107719        | 94.057497         |                   |                   | 2  |
| 20 |                    |                   |                   |                   |                    |                   | K    | 147.112804         | 74.060040         | 130.086255        | 65.546765         |                   |                   | 1  |

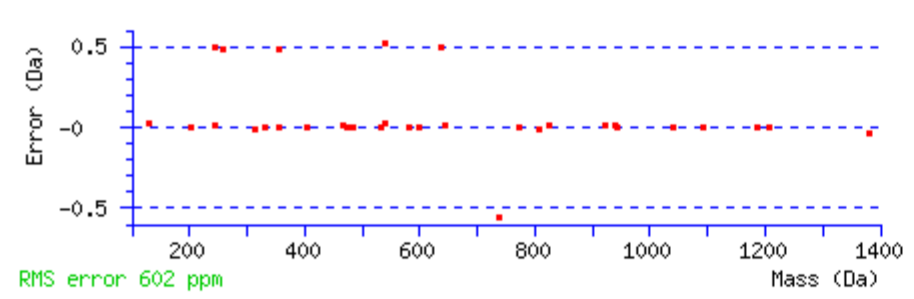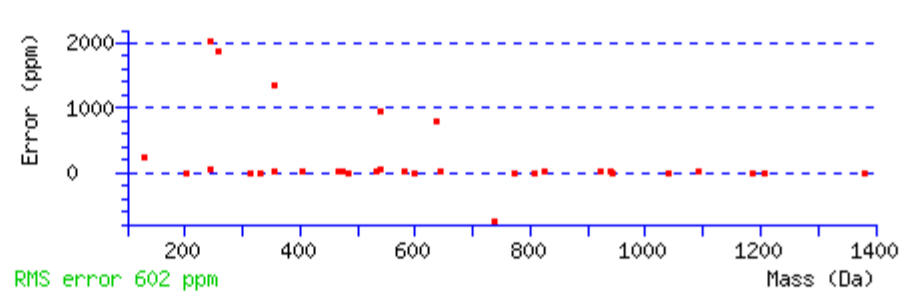

NCBI BLAST search of [GANIQLLDLPGIIEGAAQ GK](#)  
 (Parameters: blastp, nr protein database, expect=20000, no filter, PAM30)  
 Other BLAST [web gateways](#)

**All matches to this query**

| Score | Mr(calc):   | Delta    | Sequence                              |
|-------|-------------|----------|---------------------------------------|
| 65.3  | 1977.089462 | 0.003640 | <a href="#">GANIQLLDLPGIIEGAAQ GK</a> |
| 6.7   | 1977.082245 | 0.010857 | <a href="#">YELIADV NKP IIAVFEK</a>   |

# MASCOT Search Results

## Peptide View

MS/MS Fragmentation of **SESEEEVLLVSSSR**

Found in **NUDT3\_HUMAN**, Diphosphoinositol polyphosphate phosphohydrolase 1 OS=Homo sapiens GN=NUDT3 PE=1 SV=1

Match to Query 42996: 1549.753748 from(775.884150,2+) rtinseconds(2501) index(29108)

Title: Locus:1.1.1.2220.42

Data file 2011-11-10 - TFD - EP 3-6.mgf

Click mouse within plot area to zoom in by factor of two about that point

Or, Plot from  to  Da

Label all possible matches  Label matches used for scoring

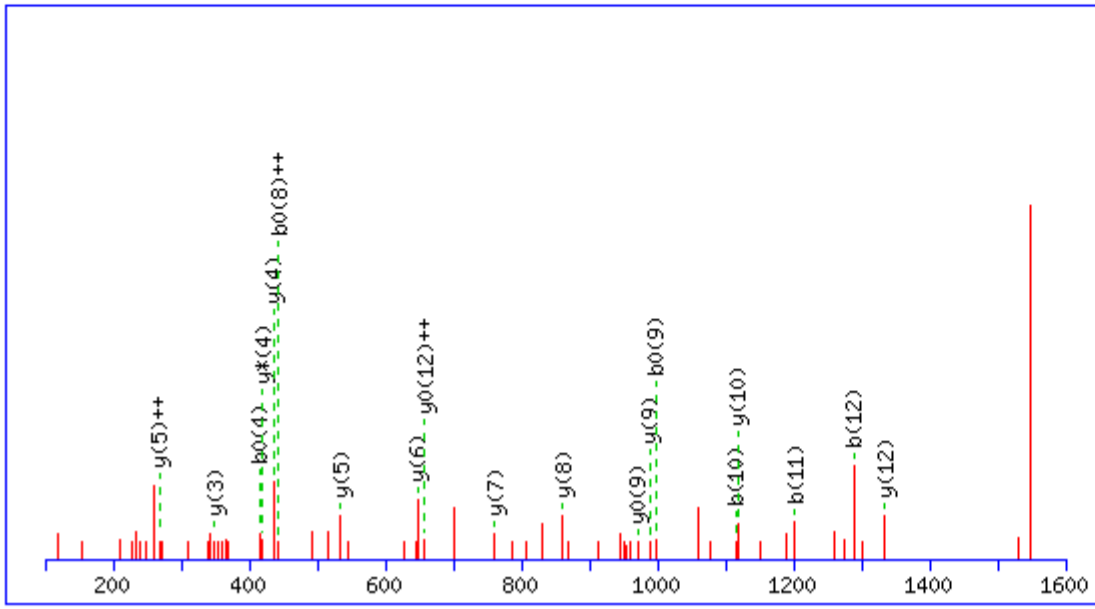

Monoisotopic mass of neutral peptide Mr(calc): 1549.747116

Fixed modifications: Propionamide (C) (apply to specified residues or termini only)

Ions Score: 35 Expect: 0.0038

Matches : 19/128 fragment ions using 55 most intense peaks [\(help\)](#)

| #  | b                  | b <sup>++</sup> | b <sup>0</sup>    | b <sup>0++</sup>  | Seq. | y                  | y <sup>++</sup>   | y <sup>*</sup>    | y <sup>++</sup> | y <sup>0</sup>    | y <sup>0++</sup>  | #  |
|----|--------------------|-----------------|-------------------|-------------------|------|--------------------|-------------------|-------------------|-----------------|-------------------|-------------------|----|
| 1  | 88.039304          | 44.523290       | 70.028739         | 35.518008         | S    |                    |                   |                   |                 |                   |                   | 14 |
| 2  | 217.081897         | 109.044586      | 199.071332        | 100.039304        | E    | 1463.722392        | 732.364834        | 1446.695843       | 723.851560      | 1445.711827       | 723.359552        | 13 |
| 3  | 304.113925         | 152.560600      | 286.103360        | 143.555318        | S    | <b>1334.679799</b> | 667.843538        | 1317.653250       | 659.330263      | 1316.669234       | <b>658.838255</b> | 12 |
| 4  | 433.156518         | 217.081897      | <b>415.145953</b> | 208.076615        | E    | 1247.647771        | 624.327524        | 1230.621222       | 615.814249      | 1229.637206       | 615.322241        | 11 |
| 5  | 562.199111         | 281.603194      | 544.188546        | 272.597911        | E    | <b>1118.605178</b> | 559.806227        | 1101.578629       | 551.292953      | 1100.594613       | 550.800945        | 10 |
| 6  | 691.241704         | 346.124490      | 673.231139        | 337.119208        | E    | <b>989.562585</b>  | 495.284931        | 972.536036        | 486.771656      | <b>971.552020</b> | 486.279648        | 9  |
| 7  | 790.310118         | 395.658697      | 772.299553        | 386.653415        | V    | <b>860.519992</b>  | 430.763634        | 843.493443        | 422.250360      | 842.509427        | 421.758352        | 8  |
| 8  | 903.394182         | 452.200729      | 885.383617        | <b>443.195447</b> | L    | <b>761.451578</b>  | 381.229427        | 744.425029        | 372.716153      | 743.441013        | 372.224145        | 7  |
| 9  | 1016.478246        | 508.742761      | <b>998.467681</b> | 499.737479        | L    | <b>648.367514</b>  | 324.687395        | 631.340965        | 316.174121      | 630.356949        | 315.682113        | 6  |
| 10 | <b>1115.546660</b> | 558.276968      | 1097.536095       | 549.271686        | V    | <b>535.283450</b>  | <b>268.145363</b> | 518.256901        | 259.632089      | 517.272885        | 259.140081        | 5  |
| 11 | <b>1202.578688</b> | 601.792982      | 1184.568123       | 592.787700        | S    | <b>436.215036</b>  | 218.611156        | <b>419.188487</b> | 210.097882      | 418.204471        | 209.605874        | 4  |
| 12 | <b>1289.610716</b> | 645.308996      | 1271.600151       | 636.303714        | S    | <b>349.183008</b>  | 175.095142        | 332.156459        | 166.581868      | 331.172443        | 166.089860        | 3  |
| 13 | 1376.642744        | 688.825010      | 1358.632179       | 679.819728        | S    | 262.150980         | 131.579128        | 245.124431        | 123.065854      | 244.140415        | 122.573846        | 2  |
| 14 |                    |                 |                   |                   | R    | 175.118952         | 88.063114         | 158.092403        | 79.549839       |                   |                   | 1  |

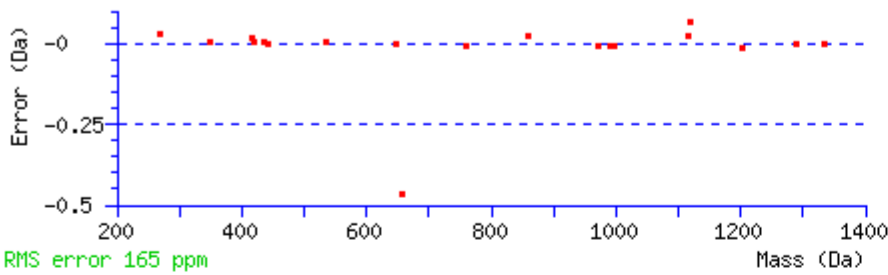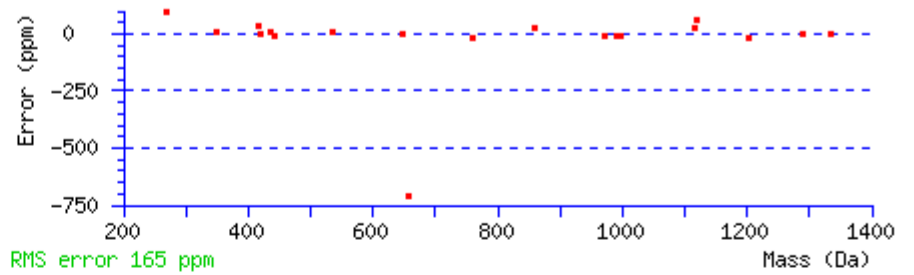

NCBI BLAST search of [SESEEEVLLVSSSR](#)

(Parameters: blastp, nr protein database, expect=20000, no filter, PAM30)

Other BLAST [web gateways](#)

All matches to this query

| Score | Mr(calc):   | Delta    | Sequence                       |
|-------|-------------|----------|--------------------------------|
| 34.9  | 1549.747116 | 0.006632 | <a href="#">SESEEEVLLVSSSR</a> |

Mascot: <http://www.matrixscience.com/>

# MASCOT SCIENCE Mascot Search Results

## Peptide View

MS/MS Fragmentation of **TWPTIIDTDDLPR**

Found in **DIP2B\_HUMAN**, Disco-interacting protein 2 homolog B OS=Homo sapiens GN=DIP2B PE=1 SV=3

Match to Query 44120: 1541.770728 from(771.892640,2+) rtinseconds(3385) index(45212)

Title: Locus:1.1.1.2833.39

Data file 2011-11-12 - TFD - EP 5-1.mgf

Click mouse within plot area to zoom in by factor of two about that point

Or, Plot from  to  Da

Label all possible matches  Label matches used for scoring

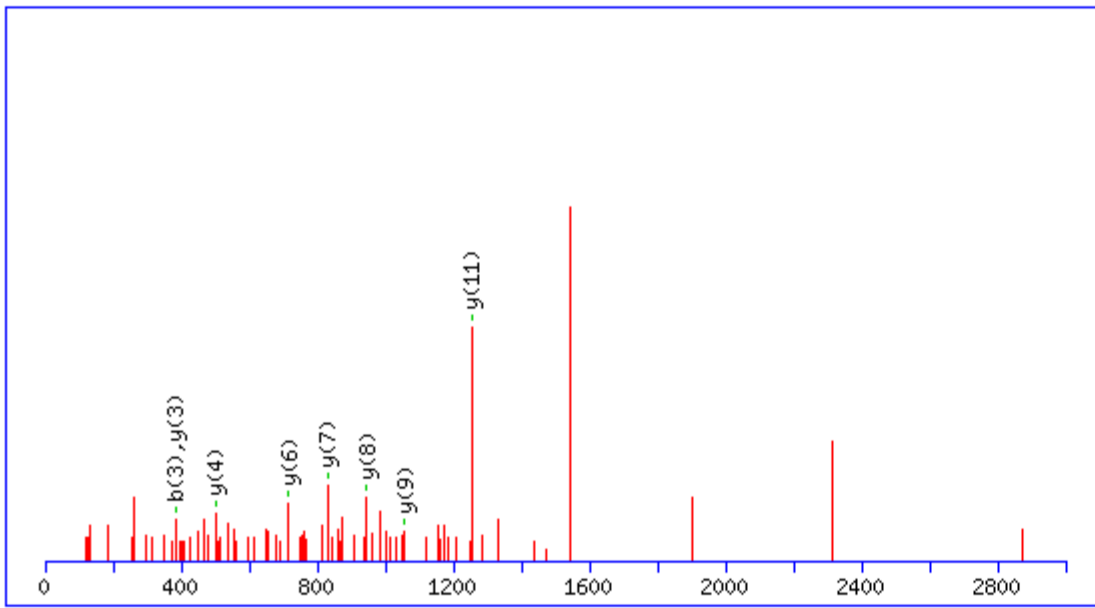

Monoisotopic mass of neutral peptide Mr(calc): 1541.772583

Fixed modifications: Propionamide (C) (apply to specified residues or termini only)

Ions Score: 41 Expect: 0.00078

Matches : 8/114 fragment ions using 14 most intense peaks [\(help\)](#)

| #  | b                 | b <sup>++</sup> | b <sup>0</sup> | b <sup>0++</sup> | Seq. | y                  | y <sup>++</sup> | y <sup>*</sup> | y <sup>*++</sup> | y <sup>0</sup> | y <sup>0++</sup> | #  |
|----|-------------------|-----------------|----------------|------------------|------|--------------------|-----------------|----------------|------------------|----------------|------------------|----|
| 1  | 102.054955        | 51.531116       | 84.044390      | 42.525833        | T    |                    |                 |                |                  |                |                  | 13 |
| 2  | 288.134268        | 144.570772      | 270.123703     | 135.565490       | W    | 1441.732172        | 721.369724      | 1424.705623    | 712.856450       | 1423.721607    | 712.364442       | 12 |
| 3  | <b>385.187032</b> | 193.097154      | 367.176467     | 184.091872       | P    | <b>1255.652859</b> | 628.330068      | 1238.626310    | 619.816793       | 1237.642294    | 619.324785       | 11 |
| 4  | 486.234711        | 243.620994      | 468.224146     | 234.615711       | T    | 1158.600095        | 579.803686      | 1141.573546    | 571.290411       | 1140.589530    | 570.798403       | 10 |
| 5  | 599.318775        | 300.163026      | 581.308210     | 291.157743       | I    | <b>1057.552416</b> | 529.279846      | 1040.525867    | 520.766572       | 1039.541851    | 520.274564       | 9  |
| 6  | 712.402839        | 356.705058      | 694.392274     | 347.699775       | I    | <b>944.468352</b>  | 472.737814      | 927.441803     | 464.224539       | 926.457787     | 463.732531       | 8  |
| 7  | 827.429782        | 414.218529      | 809.419217     | 405.213247       | D    | <b>831.384288</b>  | 416.195782      | 814.357739     | 407.682507       | 813.373723     | 407.190499       | 7  |
| 8  | 928.477461        | 464.742369      | 910.466896     | 455.737086       | T    | <b>716.357345</b>  | 358.682311      | 699.330796     | 350.169036       | 698.346780     | 349.677028       | 6  |
| 9  | 1043.504404       | 522.255840      | 1025.493839    | 513.250558       | D    | 615.309666         | 308.158471      | 598.283117     | 299.645197       | 597.299101     | 299.153189       | 5  |
| 10 | 1158.531347       | 579.769312      | 1140.520782    | 570.764029       | D    | <b>500.282723</b>  | 250.644999      | 483.256174     | 242.131725       | 482.272158     | 241.639717       | 4  |
| 11 | 1271.615411       | 636.311344      | 1253.604846    | 627.306061       | L    | <b>385.255780</b>  | 193.131528      | 368.229231     | 184.618253       |                |                  | 3  |
| 12 | 1368.668175       | 684.837726      | 1350.657610    | 675.832443       | P    | 272.171716         | 136.589496      | 255.145167     | 128.076221       |                |                  | 2  |
| 13 |                   |                 |                |                  | R    | 175.118952         | 88.063114       | 158.092403     | 79.549839        |                |                  | 1  |

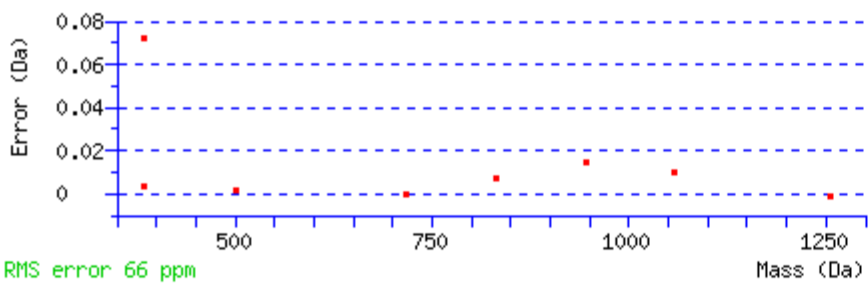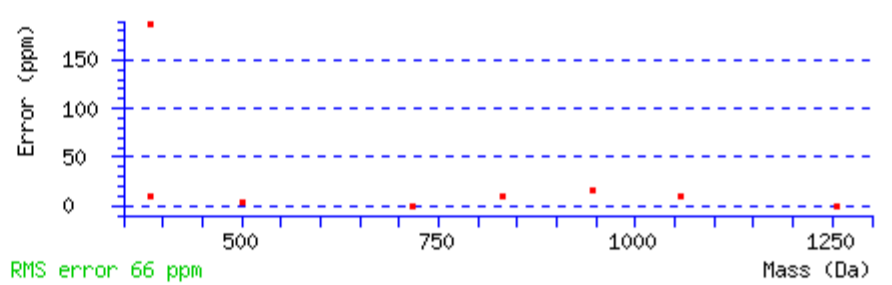

NCBI BLAST search of [TWPTIIDTDDLPR](#)

(Parameters: blastp, nr protein database, expect=20000, no filter, PAM30)

Other BLAST [web gateways](#)

## All matches to this query

| Score | Mr(calc):   | Delta     | Sequence                       |
|-------|-------------|-----------|--------------------------------|
| 40.9  | 1541.772583 | -0.001855 | <a href="#">TWPTIIDTDDLPR</a>  |
| 1.8   | 1541.769394 | 0.001334  | <a href="#">LCAGIMITASHNPK</a> |
| 1.6   | 1541.779755 | -0.009027 | <a href="#">GNVAKEEVANKPDR</a> |

Mascot: <http://www.matrixscience.com/>

# MASCOT SEARCH RESULTS

## Peptide View

MS/MS Fragmentation of **IITGGAAAQDGR**

Found in **DLG1\_HUMAN**, Disks large homolog 1 OS=Homo sapiens GN=DLG1 PE=1 SV=2

Match to Query 431312: 1128.591348 from(565.302950,2+) rtinseconds(1044) index(329530)

Title: Locus:1.1.1.730.29

Data file C:\Program Files (x86)\Matrix Science\Mascot Daemon\mgf\3 TFD - Epitel - R2\mascot\_daemon\_merge.mgf

Click mouse within plot area to zoom in by factor of two about that point

Or, Plot from  to  Da

Label all possible matches  Label matches used for scoring

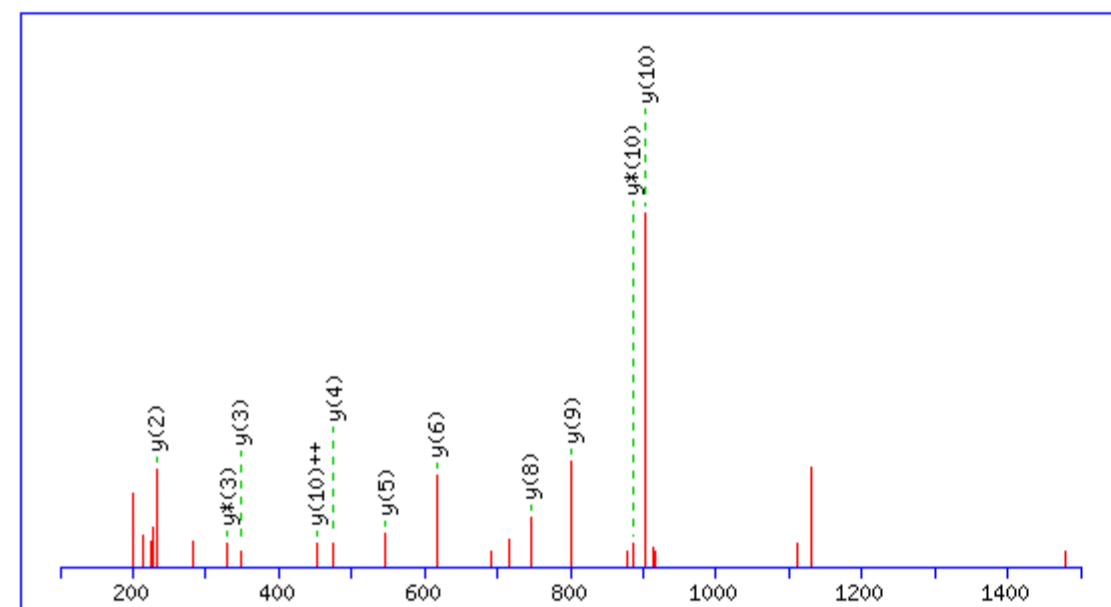

Monoisotopic mass of neutral peptide **Mr(calc)**: 1128.588730

Fixed modifications: Carbamidomethyl (C) (apply to specified residues or termini only)

Ions Score: 68 Expect: 2.7e-006

Matches : 11/108 fragment ions using 16 most intense peaks [\(help\)](#)

| #  | b          | b <sup>++</sup> | b <sup>*</sup> | b <sup>*++</sup> | b <sup>0</sup> | b <sup>0++</sup> | Seq. | y           | y <sup>++</sup> | y <sup>*</sup> | y <sup>*++</sup> | y <sup>0</sup> | y <sup>0++</sup> | #  |
|----|------------|-----------------|----------------|------------------|----------------|------------------|------|-------------|-----------------|----------------|------------------|----------------|------------------|----|
| 1  | 114.091340 | 57.549308       |                |                  |                |                  | I    |             |                 |                |                  |                |                  | 12 |
| 2  | 227.175404 | 114.091340      |                |                  |                |                  | I    | 1016.511950 | 508.759613      | 999.485401     | 500.246338       | 998.501385     | 499.754330       | 11 |
| 3  | 328.223083 | 164.615179      |                |                  | 310.212518     | 155.609897       | T    | 903.427886  | 452.217581      | 886.401337     | 443.704306       | 885.417321     | 443.212298       | 10 |
| 4  | 385.244547 | 193.125911      |                |                  | 367.233982     | 184.120629       | G    | 802.380207  | 401.693741      | 785.353658     | 393.180467       | 784.369642     | 392.688459       | 9  |
| 5  | 442.266011 | 221.636643      |                |                  | 424.255446     | 212.631361       | G    | 745.358743  | 373.183010      | 728.332194     | 364.669735       | 727.348178     | 364.177727       | 8  |
| 6  | 513.303125 | 257.155201      |                |                  | 495.292560     | 248.149918       | A    | 688.337279  | 344.672278      | 671.310730     | 336.159003       | 670.326714     | 335.666995       | 7  |
| 7  | 584.340239 | 292.673758      |                |                  | 566.329674     | 283.668475       | A    | 617.300165  | 309.153721      | 600.273616     | 300.640446       | 599.289600     | 300.148438       | 6  |
| 8  | 655.377353 | 328.192315      |                |                  | 637.366788     | 319.187032       | A    | 546.263051  | 273.635164      | 529.236502     | 265.121889       | 528.252486     | 264.629881       | 5  |
| 9  | 783.435931 | 392.221604      | 766.409382     | 383.708329       | 765.425366     | 383.216321       | Q    | 475.225937  | 238.116606      | 458.199388     | 229.603332       | 457.215372     | 229.111324       | 4  |
| 10 | 898.462874 | 449.735075      | 881.436325     | 441.221800       | 880.452309     | 440.729792       | D    | 347.167359  | 174.087317      | 330.140810     | 165.574043       | 329.156794     | 165.082035       | 3  |
| 11 | 955.484338 | 478.245807      | 938.457789     | 469.732532       | 937.473773     | 469.240524       | G    | 232.140416  | 116.573846      | 215.113867     | 108.060571       |                |                  | 2  |
| 12 |            |                 |                |                  |                |                  | R    | 175.118952  | 88.063114       | 158.092403     | 79.549839        |                |                  | 1  |

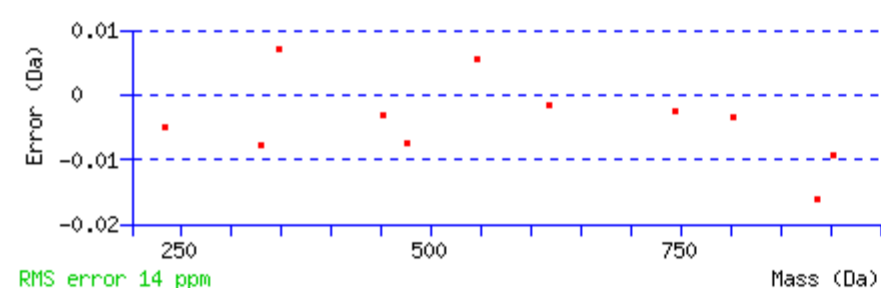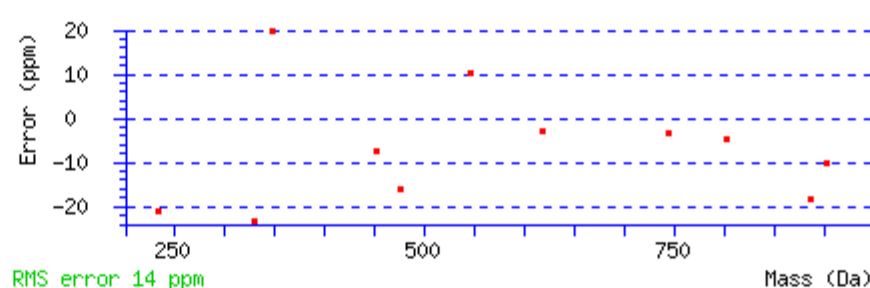

NCBI BLAST search of **IITGGAAAQDGR**

(Parameters: blastp, nr protein database, expect=20000, no filter, PAM30)

Other BLAST [web gateways](#)

## All matches to this query

| Score | Mr(calc):   | Delta     | Sequence                     |
|-------|-------------|-----------|------------------------------|
| 67.8  | 1128.588730 | 0.002618  | <a href="#">IITGGAAAQDGR</a> |
| 11.6  | 1128.588928 | 0.002420  | <a href="#">LTLFAATFVM</a>   |
| 4.1   | 1128.602631 | -0.011283 | <a href="#">LIPDPKSESK</a>   |
| 2.3   | 1128.592758 | -0.001410 | <a href="#">EPVTLGAWTR</a>   |
| 1.6   | 1128.588715 | 0.002633  | <a href="#">IIDERSPQR</a>    |
| 1.6   | 1128.600128 | -0.008780 | <a href="#">LILMYHPDK</a>    |
| 0.8   | 1128.602631 | -0.011283 | <a href="#">LPISNEPISK</a>   |
| 0.3   | 1128.596115 | -0.004767 | <a href="#">ILPDMLQQR</a>    |

Mascot: <http://www.matrixscience.com/>

**MASCOT** **SCIENCE** Mascot Search Results

Peptide View

MS/MS Fragmentation of **ETSSDVALASHILTALR**

Found in **DFFA\_HUMAN**, DNA fragmentation factor subunit alpha OS=Homo sapiens GN=DFFA PE=1 SV=1

Match to Query 58598: 1782.935772 from(595.319200,3+) rtinseconds(3702) index(54095)

Title: Locus:1.1.1.2820.9

Data file 2011-11-12 - TFD - EP 5-4.mgf

Click mouse within plot area to zoom in by factor of two about that point

Or, Plot from 100 to 1800 Da Full range

Label all possible matches  Label matches used for scoring

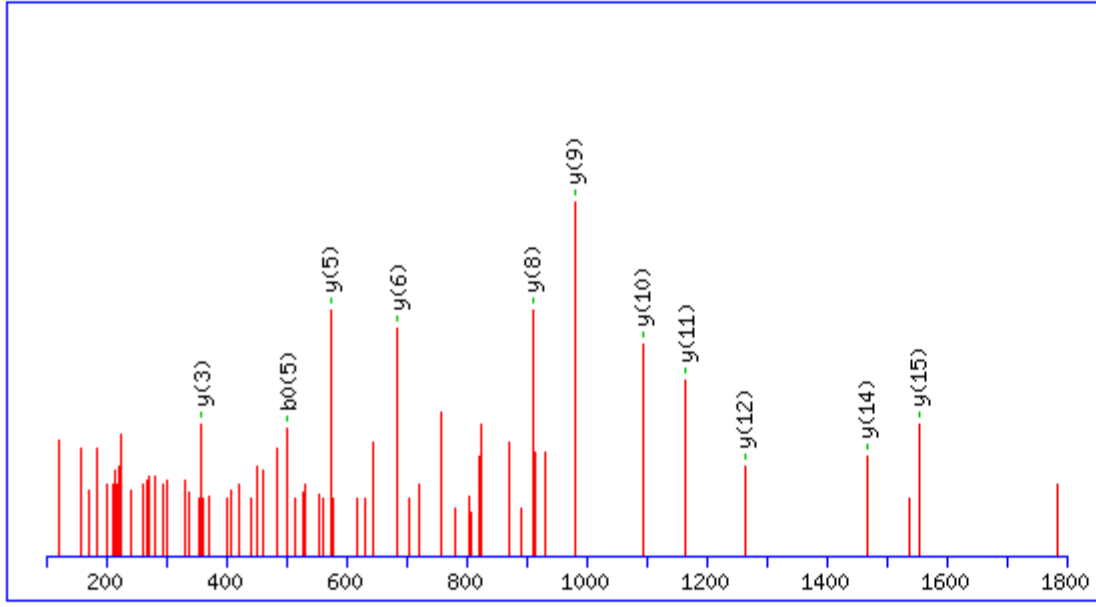

Monoisotopic mass of neutral peptide Mr(calc): 1782.947556

Fixed modifications: Propionamide (C) (apply to specified residues or termini only)

Ions Score: 82 Expect: 2.6e-008

Matches : 11/154 fragment ions using 14 most intense peaks [\(help\)](#)

| #  | b           | b <sup>++</sup> | b <sup>0</sup>    | b <sup>0++</sup> | Seq. | y                  | y <sup>++</sup> | y <sup>*</sup> | y <sup>*++</sup> | y <sup>0</sup> | y <sup>0++</sup> | #  |
|----|-------------|-----------------|-------------------|------------------|------|--------------------|-----------------|----------------|------------------|----------------|------------------|----|
| 1  | 130.049869  | 65.528572       | 112.039304        | 56.523290        | E    |                    |                 |                |                  |                |                  | 17 |
| 2  | 231.097548  | 116.052412      | 213.086983        | 107.047130       | T    | 1654.912261        | 827.959768      | 1637.885712    | 819.446494       | 1636.901696    | 818.954486       | 16 |
| 3  | 318.129576  | 159.568426      | 300.119011        | 150.563144       | S    | <b>1553.864582</b> | 777.435929      | 1536.838033    | 768.922654       | 1535.854017    | 768.430646       | 15 |
| 4  | 405.161604  | 203.084440      | 387.151039        | 194.079157       | S    | <b>1466.832554</b> | 733.919915      | 1449.806005    | 725.406640       | 1448.821989    | 724.914632       | 14 |
| 5  | 520.188547  | 260.597912      | <b>502.177982</b> | 251.592629       | D    | 1379.800526        | 690.403901      | 1362.773977    | 681.890626       | 1361.789961    | 681.398618       | 13 |
| 6  | 619.256961  | 310.132118      | 601.246396        | 301.126836       | V    | <b>1264.773583</b> | 632.890429      | 1247.747034    | 624.377155       | 1246.763018    | 623.885147       | 12 |
| 7  | 690.294075  | 345.650675      | 672.283510        | 336.645393       | A    | <b>1165.705169</b> | 583.356222      | 1148.678620    | 574.842948       | 1147.694604    | 574.350940       | 11 |
| 8  | 803.378139  | 402.192707      | 785.367574        | 393.187425       | L    | <b>1094.668055</b> | 547.837665      | 1077.641506    | 539.324391       | 1076.657490    | 538.832383       | 10 |
| 9  | 874.415253  | 437.711264      | 856.404688        | 428.705982       | A    | <b>981.583991</b>  | 491.295633      | 964.557442     | 482.782359       | 963.573426     | 482.290351       | 9  |
| 10 | 961.447281  | 481.227278      | 943.436716        | 472.221996       | S    | <b>910.546877</b>  | 455.777076      | 893.520328     | 447.263802       | 892.536312     | 446.771794       | 8  |
| 11 | 1098.506193 | 549.756734      | 1080.495628       | 540.751452       | H    | 823.514849         | 412.261062      | 806.488300     | 403.747788       | 805.504284     | 403.255780       | 7  |
| 12 | 1211.590257 | 606.298766      | 1193.579692       | 597.293484       | I    | <b>686.455937</b>  | 343.731606      | 669.429388     | 335.218332       | 668.445372     | 334.726324       | 6  |
| 13 | 1324.674321 | 662.840798      | 1306.663756       | 653.835516       | L    | <b>573.371873</b>  | 287.189574      | 556.345324     | 278.676300       | 555.361308     | 278.184292       | 5  |
| 14 | 1425.722000 | 713.364638      | 1407.711435       | 704.359355       | T    | 460.287809         | 230.647542      | 443.261260     | 222.134268       | 442.277244     | 221.642260       | 4  |
| 15 | 1496.759114 | 748.883195      | 1478.748549       | 739.877912       | A    | <b>359.240130</b>  | 180.123703      | 342.213581     | 171.610428       |                |                  | 3  |
| 16 | 1609.843178 | 805.425227      | 1591.832613       | 796.419944       | L    | 288.203016         | 144.605146      | 271.176467     | 136.091871       |                |                  | 2  |
| 17 |             |                 |                   |                  | R    | 175.118952         | 88.063114       | 158.092403     | 79.549839        |                |                  | 1  |

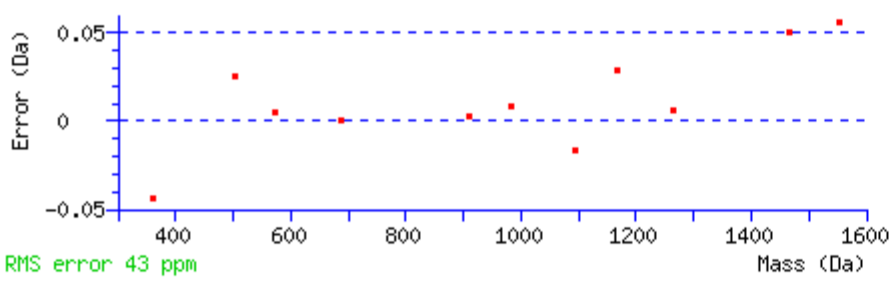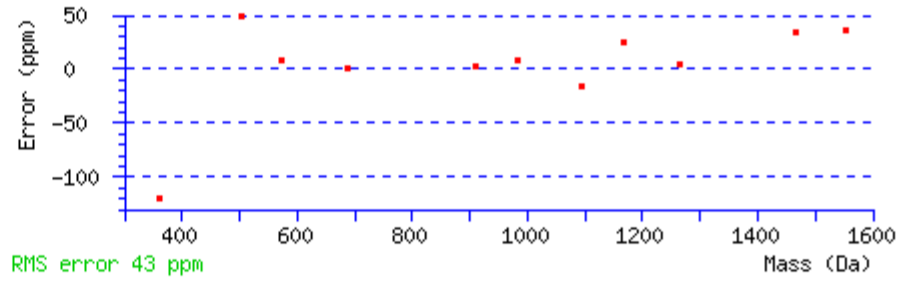

NCBI BLAST search of [ETSSDVALASHILTALR](#)

(Parameters: blastp, nr protein database, expect=20000, no filter, PAM30)

Other BLAST [web gateways](#)

All matches to this query

| Score | Mr(calc):   | Delta     | Sequence                          |
|-------|-------------|-----------|-----------------------------------|
| 81.7  | 1782.947556 | -0.011784 | <a href="#">ETSSDVALASHILTALR</a> |
| 0.8   | 1782.943726 | -0.007954 | <a href="#">IPMTNSPLLDPLPSLK</a>  |
| 0.6   | 1782.943726 | -0.007954 | <a href="#">IPMTNSPLLDPLPSLK</a>  |



# MASCOT Search Results

## Peptide View

MS/MS Fragmentation of **GGARLPLR**

Found in **B3GA2\_HUMAN**, Galactosylgalactosylxylosylprotein 3-beta-glucuronosyltransferase 2 OS=Homo sapiens  
GN=B3GAT2 PE=1 SV=2

Match to Query 4984: 854.502388 from(428.258470,2+) rtinseconds(1724) index(14499)

Title: Locus:1.1.1.1923.10

Data file 2011-11-10 - TFD - EP 3-6.mgf

Click mouse within plot area to zoom in by factor of two about that point

Or,   to  Da

Label all possible matches  Label matches used for scoring

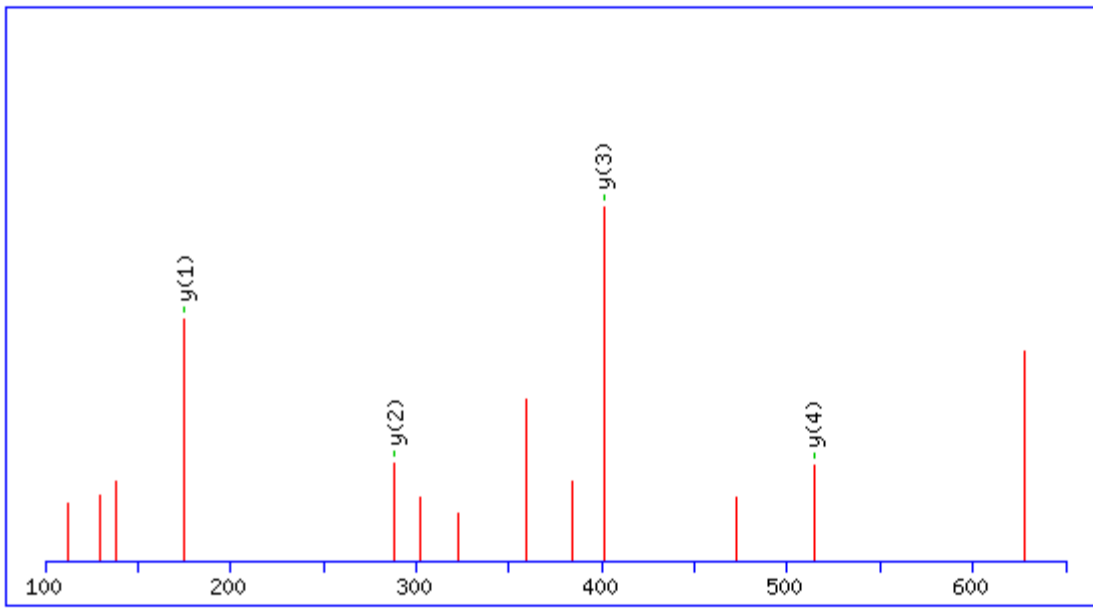

Monoisotopic mass of neutral peptide Mr(calc): 854.508621

Fixed modifications: Propionamide (C) (apply to specified residues or termini only)

Variable modifications:

P6 : Oxidation (P)

Ions Score: 31 Expect: 0.0054

Matches : 4/50 fragment ions using 6 most intense peaks ([help](#))

| # | b          | b <sup>++</sup> | b <sup>*</sup> | b <sup>*++</sup> | Seq.     | y                 | y <sup>++</sup> | y <sup>*</sup> | y <sup>*++</sup> | #        |
|---|------------|-----------------|----------------|------------------|----------|-------------------|-----------------|----------------|------------------|----------|
| 1 | 58.028740  | 29.518008       |                |                  | <b>G</b> |                   |                 |                |                  | <b>8</b> |
| 2 | 115.050204 | 58.028740       |                |                  | <b>G</b> | 798.494448        | 399.750862      | 781.467899     | 391.237588       | <b>7</b> |
| 3 | 186.087318 | 93.547297       |                |                  | <b>A</b> | 741.472984        | 371.240130      | 724.446435     | 362.726856       | <b>6</b> |
| 4 | 342.188429 | 171.597852      | 325.161880     | 163.084578       | <b>R</b> | 670.435870        | 335.721573      | 653.409321     | 327.208299       | <b>5</b> |
| 5 | 455.272493 | 228.139884      | 438.245944     | 219.626610       | <b>L</b> | <b>514.334759</b> | 257.671018      | 497.308210     | 249.157743       | <b>4</b> |
| 6 | 568.320172 | 284.663724      | 551.293623     | 276.150450       | <b>P</b> | <b>401.250695</b> | 201.128985      | 384.224146     | 192.615711       | <b>3</b> |
| 7 | 681.404236 | 341.205756      | 664.377687     | 332.692482       | <b>L</b> | <b>288.203016</b> | 144.605146      | 271.176467     | 136.091871       | <b>2</b> |
| 8 |            |                 |                |                  | <b>R</b> | <b>175.118952</b> | 88.063114       | 158.092403     | 79.549839        | <b>1</b> |

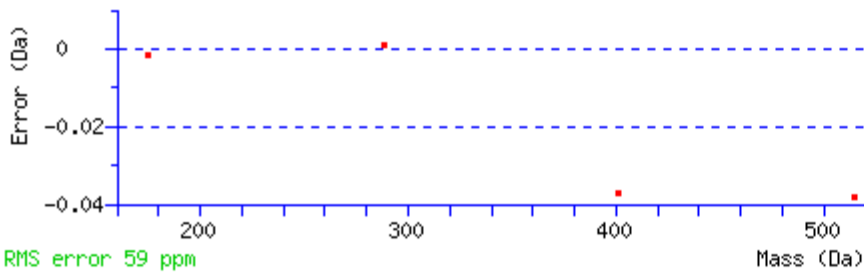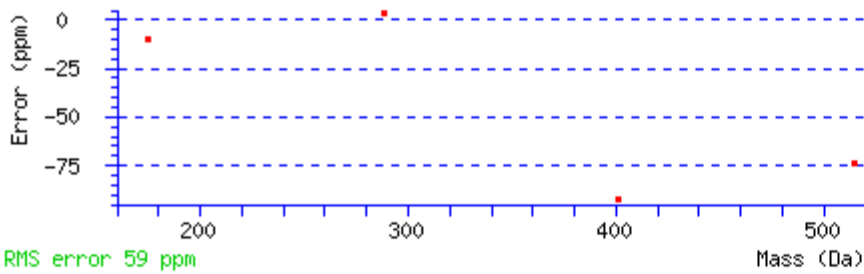

NCBI BLAST search of [GGARLPLR](#)

(Parameters: blastp, nr protein database, expect=20000, no filter, PAM30)

Other BLAST [web gateways](#)

## All matches to this query

| Score | Mr(calc):  | Delta     | Sequence                  |
|-------|------------|-----------|---------------------------|
| 30.8  | 854.508621 | -0.006233 | <a href="#">GGARLPLR</a>  |
| 30.8  | 854.497391 | 0.004997  | <a href="#">GNLGLIPR</a>  |
| 30.8  | 854.497375 | 0.005013  | <a href="#">LNNLIPR</a>   |
| 30.8  | 854.497391 | 0.004997  | <a href="#">QNVPIIR</a>   |
| 30.6  | 854.508606 | -0.006218 | <a href="#">RNPALIR</a>   |
| 29.5  | 854.497375 | 0.005013  | <a href="#">AGAAPALLR</a> |
| 16.8  | 854.508621 | -0.006233 | <a href="#">VAAGRLPR</a>  |
| 14.4  | 854.497375 | 0.005013  | <a href="#">QAALPSLR</a>  |
| 14.4  | 854.508621 | -0.006233 | <a href="#">RVKPSPR</a>   |
| 10.6  | 854.508621 | -0.006233 | <a href="#">VGRPAALR</a>  |

# **MASCOT** Mascot Search Results

## Peptide View

MS/MS Fragmentation of **TVYNLNDK**

Found in **DNLI3\_HUMAN**, DNA ligase 3 OS=Homo sapiens GN=LIG3 PE=1 SV=2

Match to Query 8418: 965.484268 from(483.749410,2+) rtinseconds(1844) index(19206)

Title: Locus:1.1.1.2217.19

Data file 2011-11-12 - TFD - EP 5-3.mgf

Click mouse within plot area to zoom in by factor of two about that point

Or, Plot from  to  Da

Label all possible matches  Label matches used for scoring

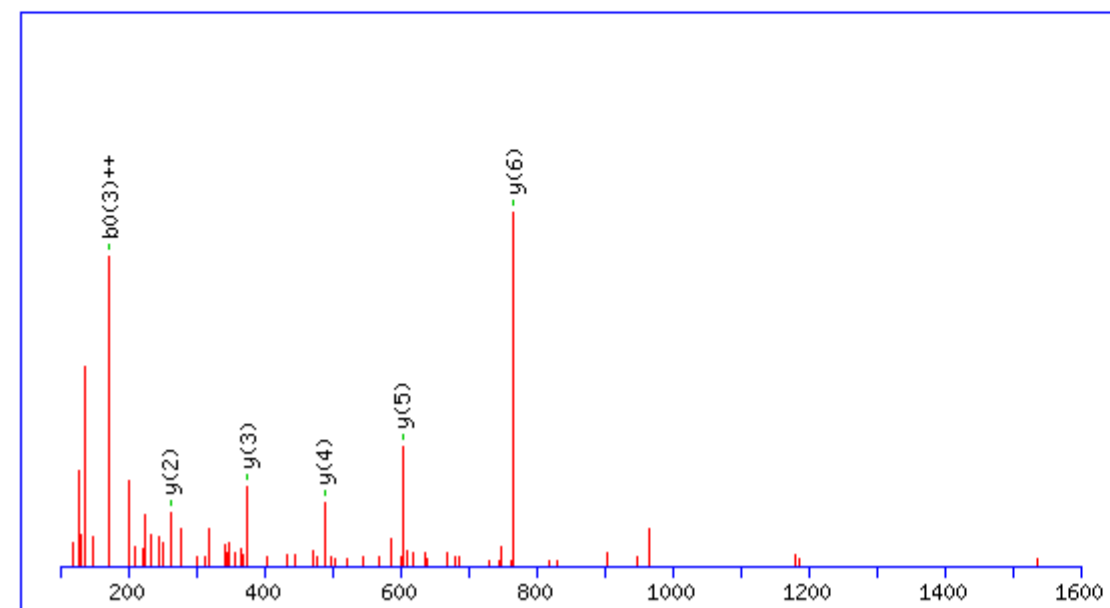

Monoisotopic mass of neutral peptide Mr(calc): 965.481796

Fixed modifications: Propionamide (C) (apply to specified residues or termini only)

Ions Score: 35 Expect: 0.0036

Matches : 6/76 fragment ions using 9 most intense peaks [\(help\)](#)

| # | b          | b <sup>++</sup> | b <sup>*</sup> | b <sup>+++</sup> | b <sup>0</sup> | b <sup>0++</sup>  | Seq. | y                 | y <sup>++</sup> | y <sup>*</sup> | y <sup>+++</sup> | y <sup>0</sup> | y <sup>0++</sup> | # |
|---|------------|-----------------|----------------|------------------|----------------|-------------------|------|-------------------|-----------------|----------------|------------------|----------------|------------------|---|
| 1 | 102.054955 | 51.531116       |                |                  | 84.044390      | 42.525833         | T    |                   |                 |                |                  |                |                  | 8 |
| 2 | 201.123369 | 101.065322      |                |                  | 183.112804     | 92.060040         | V    | 865.441408        | 433.224342      | 848.414859     | 424.711068       | 847.430843     | 424.219060       | 7 |
| 3 | 364.186698 | 182.596987      |                |                  | 346.176133     | <b>173.591705</b> | Y    | <b>766.372994</b> | 383.690135      | 749.346445     | 375.176861       | 748.362429     | 374.684853       | 6 |
| 4 | 478.229625 | 239.618451      | 461.203076     | 231.105176       | 460.219060     | 230.613168        | N    | <b>603.309665</b> | 302.158471      | 586.283116     | 293.645196       | 585.299100     | 293.153188       | 5 |
| 5 | 591.313689 | 296.160483      | 574.287140     | 287.647208       | 573.303124     | 287.155200        | L    | <b>489.266738</b> | 245.137007      | 472.240189     | 236.623732       | 471.256173     | 236.131724       | 4 |
| 6 | 705.356616 | 353.181946      | 688.330067     | 344.668672       | 687.346051     | 344.176664        | N    | <b>376.182674</b> | 188.594975      | 359.156125     | 180.081700       | 358.172109     | 179.589692       | 3 |
| 7 | 820.383559 | 410.695418      | 803.357010     | 402.182143       | 802.372994     | 401.690135        | D    | <b>262.139747</b> | 131.573511      | 245.113198     | 123.060237       | 244.129182     | 122.568229       | 2 |
| 8 |            |                 |                |                  |                |                   | K    | 147.112804        | 74.060040       | 130.086255     | 65.546765        |                |                  | 1 |

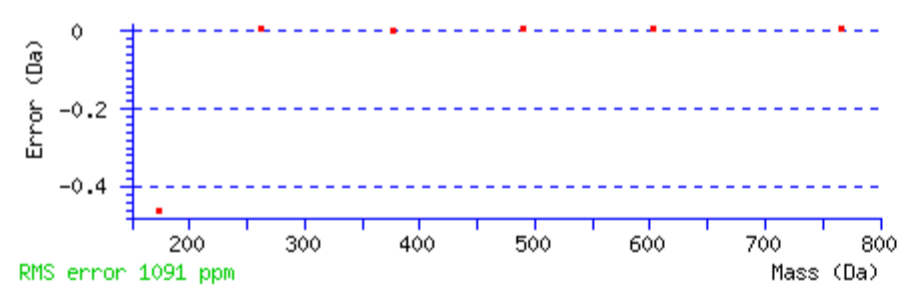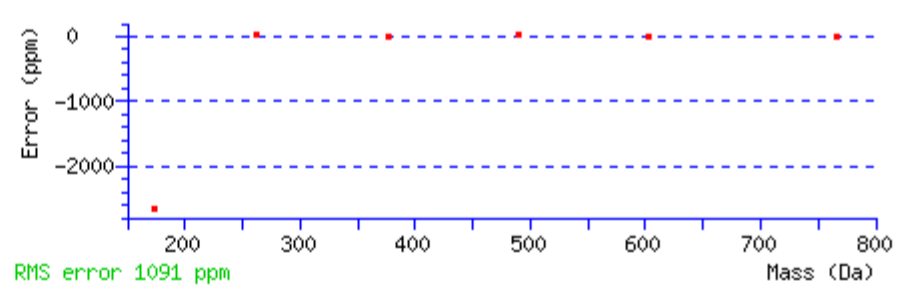

NCBI BLAST search of **TVYNLNDK**

(Parameters: blastp, nr protein database, expect=20000, no filter, PAM30)

Other BLAST [web gateways](#)

## All matches to this query

| Score | Mr(calc):  | Delta     | Sequence                  |
|-------|------------|-----------|---------------------------|
| 34.8  | 965.481796 | 0.002472  | <a href="#">TVYNLNDK</a>  |
| 33.1  | 965.493027 | -0.008759 | <a href="#">SLYNLGGSR</a> |
| 9.2   | 965.489197 | -0.004929 | <a href="#">EVFPIMAK</a>  |
| 8.2   | 965.485153 | -0.000885 | <a href="#">LSSSMNSIK</a> |
| 4.4   | 965.481827 | 0.002441  | <a href="#">DGNVVTSFK</a> |
| 4.1   | 965.489182 | -0.004914 | <a href="#">EAIEVFMK</a>  |
| 3.7   | 965.493027 | -0.008759 | <a href="#">EHPDVNKK</a>  |
| 1.9   | 965.485168 | -0.000900 | <a href="#">SVSTMNLSK</a> |
| 1.8   | 965.485184 | -0.000916 | <a href="#">TQTMKTPK</a>  |
| 1.7   | 965.493027 | -0.008759 | <a href="#">SLYSLGGNR</a> |

# MASCOT SEARCH RESULTS

## Peptide View

MS/MS Fragmentation of **IIDFLSALEGFK**

Found in **MSH6\_HUMAN**, DNA mismatch repair protein Msh6 OS=Homo sapiens GN=MSH6 PE=1 SV=2

Match to Query 39209: 1351.747768 from(676.881160,2+) rtinseconds(4569) index(68968)

Title: Locus:1.1.1.3031.32

Data file 2011-11-12 - TFD - EP 6-1.mgf

Click mouse within plot area to zoom in by factor of two about that point

Or, Plot from  to  Da

Label all possible matches  Label matches used for scoring

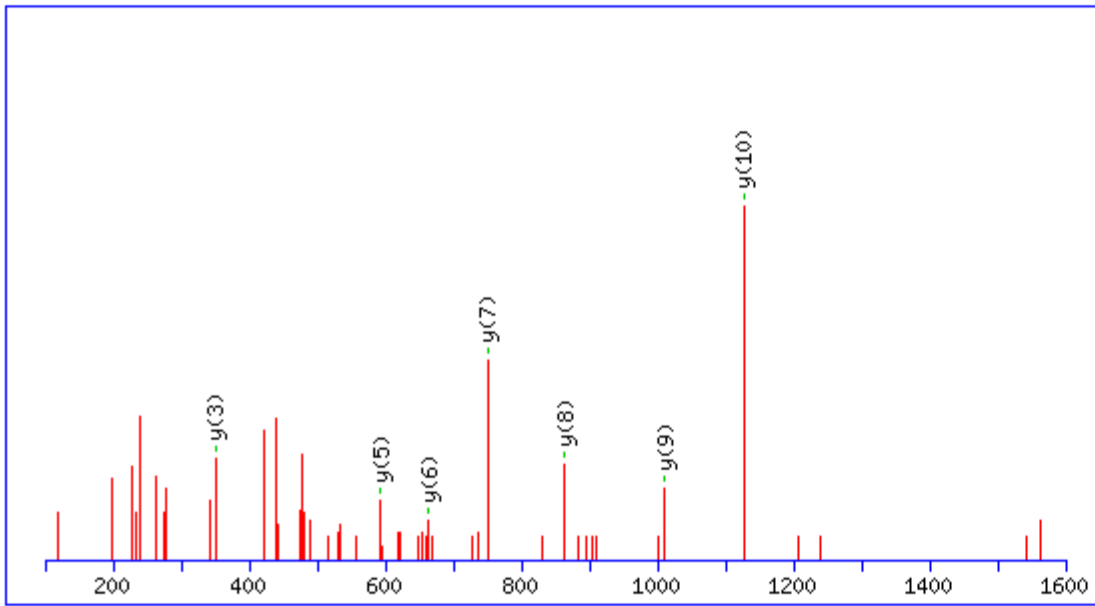

Monoisotopic mass of neutral peptide  $M_r(\text{calc})$ : 1351.738739

Fixed modifications: Propionamide (C) (apply to specified residues or termini only)

Ions Score: 52 Expect: 2.7e-005

Matches : 7/100 fragment ions using 11 most intense peaks ([help](#))

| #  | b           | b <sup>++</sup> | b <sup>0</sup> | b <sup>0++</sup> | Seq. | y                  | y <sup>++</sup> | y <sup>*</sup> | y <sup>*++</sup> | y <sup>0</sup> | y <sup>0++</sup> | #  |
|----|-------------|-----------------|----------------|------------------|------|--------------------|-----------------|----------------|------------------|----------------|------------------|----|
| 1  | 114.091340  | 57.549308       |                |                  | I    |                    |                 |                |                  |                |                  | 12 |
| 2  | 227.175404  | 114.091340      |                |                  | I    | 1239.661966        | 620.334621      | 1222.635417    | 611.821347       | 1221.651401    | 611.329339       | 11 |
| 3  | 342.202347  | 171.604811      | 324.191782     | 162.599529       | D    | <b>1126.577902</b> | 563.792589      | 1109.551353    | 555.279315       | 1108.567337    | 554.787307       | 10 |
| 4  | 489.270761  | 245.139018      | 471.260196     | 236.133736       | F    | <b>1011.550959</b> | 506.279118      | 994.524410     | 497.765843       | 993.540394     | 497.273835       | 9  |
| 5  | 602.354825  | 301.681051      | 584.344260     | 292.675768       | L    | <b>864.482545</b>  | 432.744911      | 847.455996     | 424.231636       | 846.471980     | 423.739628       | 8  |
| 6  | 689.386853  | 345.197065      | 671.376288     | 336.191782       | S    | <b>751.398481</b>  | 376.202879      | 734.371932     | 367.689604       | 733.387916     | 367.197596       | 7  |
| 7  | 760.423967  | 380.715622      | 742.413402     | 371.710339       | A    | <b>664.366453</b>  | 332.686865      | 647.339904     | 324.173590       | 646.355888     | 323.681582       | 6  |
| 8  | 873.508031  | 437.257654      | 855.497466     | 428.252371       | L    | <b>593.329339</b>  | 297.168308      | 576.302790     | 288.655033       | 575.318774     | 288.163025       | 5  |
| 9  | 1002.550624 | 501.778950      | 984.540059     | 492.773667       | E    | 480.245275         | 240.626275      | 463.218726     | 232.113001       | 462.234710     | 231.620993       | 4  |
| 10 | 1059.572088 | 530.289682      | 1041.561523    | 521.284399       | G    | <b>351.202682</b>  | 176.104979      | 334.176133     | 167.591704       |                |                  | 3  |
| 11 | 1206.640502 | 603.823889      | 1188.629937    | 594.818606       | F    | 294.181218         | 147.594247      | 277.154669     | 139.080973       |                |                  | 2  |
| 12 |             |                 |                |                  | K    | 147.112804         | 74.060040       | 130.086255     | 65.546765        |                |                  | 1  |

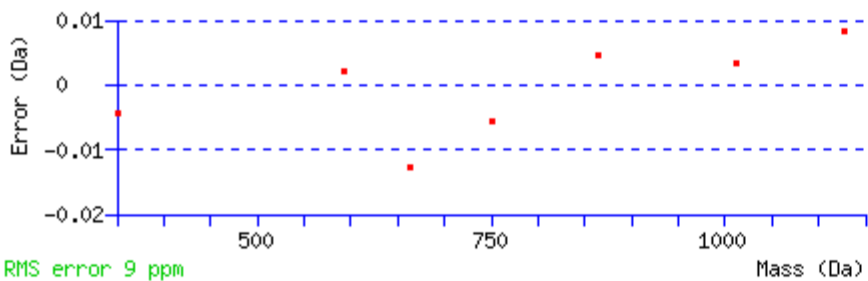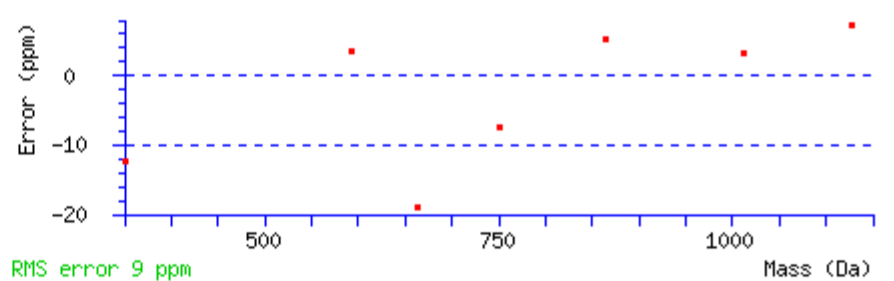

NCBI BLAST search of [IIDFLSALEGFK](#)

(Parameters: blastp, nr protein database, expect=20000, no filter, PAM30)

Other BLAST [web gateways](#)

All matches to this query

| Score | $M_r(\text{calc})$ : | Delta     | Sequence                     |
|-------|----------------------|-----------|------------------------------|
| 51.6  | 1351.738739          | 0.009029  | <a href="#">IIDFLSALEGFK</a> |
| 2.7   | 1351.735565          | 0.012203  | <a href="#">LINFMKMLSQK</a>  |
| 0.2   | 1351.750000          | -0.002232 | <a href="#">LLVDIHVPDGFK</a> |

Mascot: <http://www.matrixscience.com/>

# MASCOT Search Results

## Peptide View

MS/MS Fragmentation of **DVDTYYLSNLVK**

Found in **XPC\_HUMAN**, DNA repair protein complementing XP-C cells OS=Homo sapiens GN=XPC PE=1 SV=4

Match to Query 42904: 1428.720268 from(715.367410,2+) rtinseconds(3323) index(47572)

Title: Locus:1.1.1.2571.33

Data file 2011-11-12 - TFD - EP 6-1.mgf

Click mouse within plot area to zoom in by factor of two about that point

Or, Plot from  to  Da

Label all possible matches  Label matches used for scoring

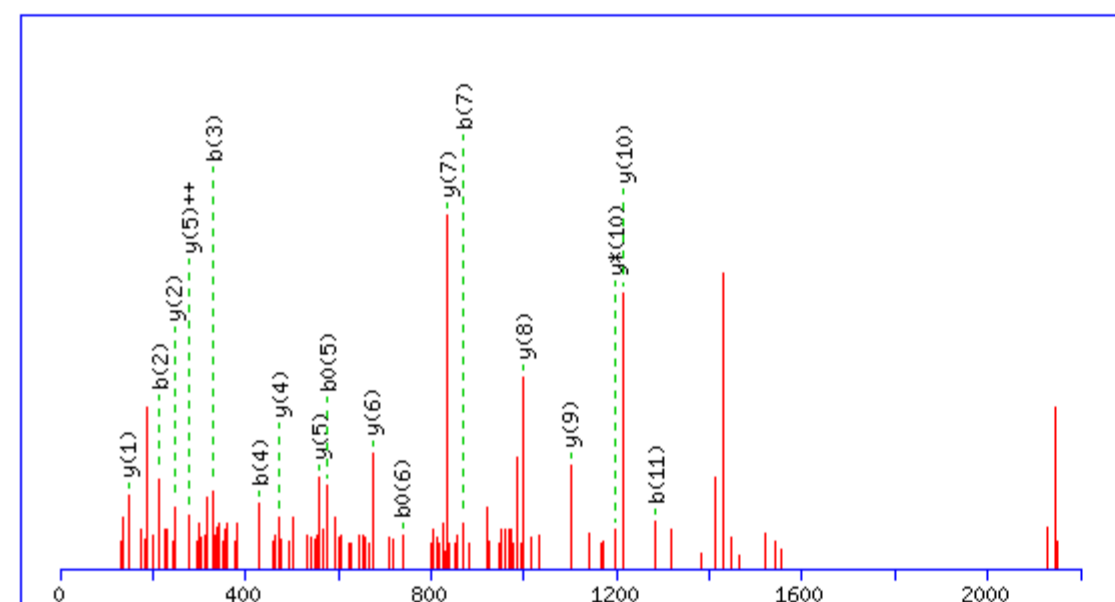

Monoisotopic mass of neutral peptide Mr(calc): 1428.713654

Fixed modifications: Propionamide (C) (apply to specified residues or termini only)

Ions Score: 54 Expect: 2.7e-005

Matches: 18/108 fragment ions using 36 most intense peaks [\(help\)](#)

| #  | b                  | b <sup>++</sup> | b <sup>*</sup> | b <sup>*++</sup> | b <sup>0</sup>    | b <sup>0++</sup> | Seq. | y                  | y <sup>++</sup>   | y <sup>*</sup>     | y <sup>*++</sup> | y <sup>0</sup> | y <sup>0++</sup> | #  |
|----|--------------------|-----------------|----------------|------------------|-------------------|------------------|------|--------------------|-------------------|--------------------|------------------|----------------|------------------|----|
| 1  | 116.034219         | 58.520748       |                |                  | 98.023654         | 49.515465        | D    |                    |                   |                    |                  |                |                  | 12 |
| 2  | <b>215.102633</b>  | 108.054954      |                |                  | 197.092068        | 99.049672        | V    | 1314.693995        | 657.850636        | 1297.667446        | 649.337361       | 1296.683430    | 648.845353       | 11 |
| 3  | <b>330.129576</b>  | 165.568426      |                |                  | 312.119011        | 156.563144       | D    | <b>1215.625581</b> | 608.316429        | <b>1198.599032</b> | 599.803154       | 1197.615016    | 599.311146       | 10 |
| 4  | <b>431.177255</b>  | 216.092266      |                |                  | 413.166690        | 207.086983       | T    | <b>1100.598638</b> | 550.802957        | 1083.572089        | 542.289683       | 1082.588073    | 541.797675       | 9  |
| 5  | 594.240584         | 297.623930      |                |                  | <b>576.230019</b> | 288.618648       | Y    | <b>999.550959</b>  | 500.279118        | 982.524410         | 491.765843       | 981.540394     | 491.273835       | 8  |
| 6  | 757.303913         | 379.155595      |                |                  | <b>739.293348</b> | 370.150312       | Y    | <b>836.487630</b>  | 418.747453        | 819.461081         | 410.234179       | 818.477065     | 409.742171       | 7  |
| 7  | <b>870.387977</b>  | 435.697627      |                |                  | 852.377412        | 426.692344       | L    | <b>673.424301</b>  | 337.215789        | 656.397752         | 328.702514       | 655.413736     | 328.210506       | 6  |
| 8  | 957.420005         | 479.213641      |                |                  | 939.409440        | 470.208358       | S    | <b>560.340237</b>  | <b>280.673757</b> | 543.313688         | 272.160482       | 542.329672     | 271.668474       | 5  |
| 9  | 1071.462932        | 536.235104      | 1054.436383    | 527.721830       | 1053.452367       | 527.229822       | N    | <b>473.308209</b>  | 237.157742        | 456.281660         | 228.644468       |                |                  | 4  |
| 10 | 1184.546996        | 592.777136      | 1167.520447    | 584.263862       | 1166.536431       | 583.771854       | L    | 359.265282         | 180.136279        | 342.238733         | 171.623004       |                |                  | 3  |
| 11 | <b>1283.615410</b> | 642.311343      | 1266.588861    | 633.798069       | 1265.604845       | 633.306061       | V    | <b>246.181218</b>  | 123.594247        | 229.154669         | 115.080973       |                |                  | 2  |
| 12 |                    |                 |                |                  |                   |                  | K    | <b>147.112804</b>  | 74.060040         | 130.086255         | 65.546765        |                |                  | 1  |

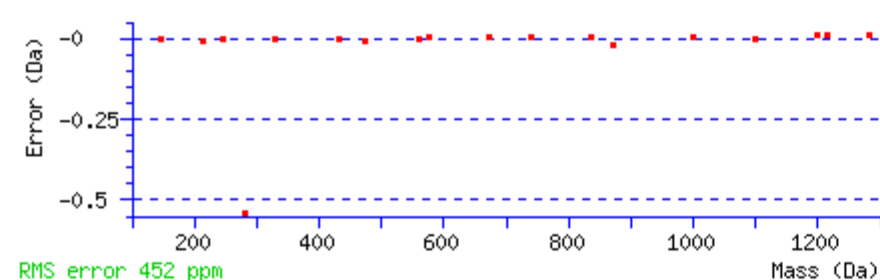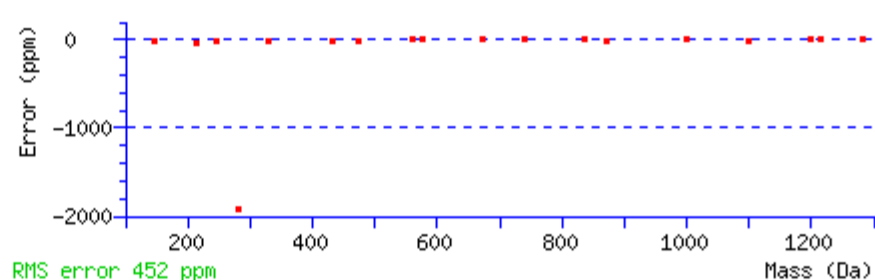

NCBI BLAST search of **DVDTYYLSNLVK**

(Parameters: blastp, nr protein database, expect=20000, no filter, PAM30)

Other BLAST [web gateways](#)

## All matches to this query

| Score | Mr(calc):   | Delta     | Sequence                        |
|-------|-------------|-----------|---------------------------------|
| 54.1  | 1428.713654 | 0.006614  | <a href="#">DVDTYYLSNLVK</a>    |
| 5.0   | 1428.732269 | -0.012001 | <a href="#">IDSFNSLYMLVK</a>    |
| 3.9   | 1428.732269 | -0.012001 | <a href="#">TIMKPLEYQFK</a>     |
| 3.7   | 1428.720871 | -0.000603 | <a href="#">SPSPSPTSPGSLRK</a>  |
| 3.1   | 1428.720871 | -0.000603 | <a href="#">SPSPSPTSPGSLRK</a>  |
| 2.1   | 1428.720856 | -0.000588 | <a href="#">LTDLLQEEQGR</a>     |
| 1.6   | 1428.728256 | -0.007988 | <a href="#">GELGMSPPGSKIPK</a>  |
| 1.5   | 1428.732086 | -0.011818 | <a href="#">ASSSLQPPAKAQGR</a>  |
| 1.2   | 1428.728256 | -0.007988 | <a href="#">MDLPALLPAPTAR</a>   |
| 1.0   | 1428.724899 | -0.004631 | <a href="#">AASLLFGPGGPAPDK</a> |

# MASCOT Search Results

## Peptide View

MS/MS Fragmentation of **ARNLISPR**

Found in **CDT1\_HUMAN**, DNA replication factor Cdt1 OS=Homo sapiens GN=CDT1 PE=1 SV=3

Match to Query 183158: 941.547848 from(471.781200,2+) rtinseconds(1809) index(508285)

Title: Locus:1.1.1.1020.10

Data file C:\Program Files (x86)\Matrix Science\Mascot Daemon\mgf3 TFD - Epitel - R2\mascot\_daemon\_merge.mgf

Click mouse within plot area to zoom in by factor of two about that point

Or, Plot from  to  Da

Label all possible matches  Label matches used for scoring

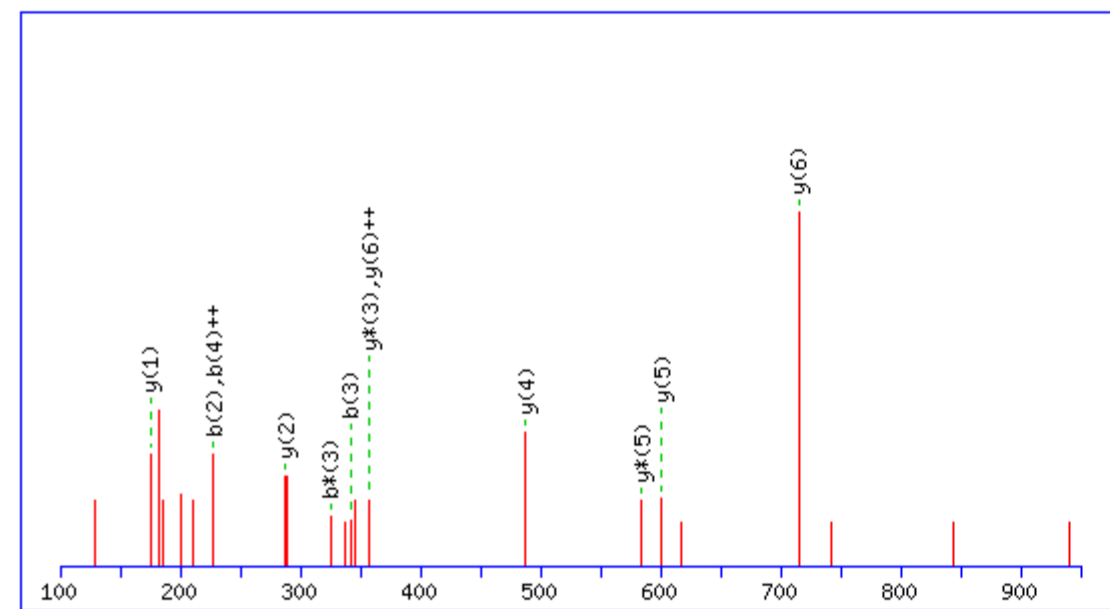

Monoisotopic mass of neutral peptide Mr(calc): 941.540634

Fixed modifications: Carbamidomethyl (C) (apply to specified residues or termini only)

Variable modifications:

P7 : Oxidation (P)

Ions Score: 33 Expect: 0.007

Matches : 12/68 fragment ions using 17 most intense peaks ([help](#))

| # | b                 | b <sup>++</sup>   | b <sup>*</sup>    | b <sup>*++</sup> | b <sup>0</sup> | b <sup>0++</sup> | Seq. | y                 | y <sup>++</sup>   | y <sup>*</sup>    | y <sup>*++</sup> | y <sup>0</sup> | y <sup>0++</sup> | # |
|---|-------------------|-------------------|-------------------|------------------|----------------|------------------|------|-------------------|-------------------|-------------------|------------------|----------------|------------------|---|
| 1 | 72.044390         | 36.525833         |                   |                  |                |                  | A    |                   |                   |                   |                  |                |                  | 8 |
| 2 | <b>228.145501</b> | 114.576388        | 211.118952        | 106.063114       |                |                  | R    | 871.510825        | 436.259051        | 854.484276        | 427.745776       | 853.500260     | 427.253768       | 7 |
| 3 | <b>342.188428</b> | 171.597852        | <b>325.161879</b> | 163.084577       |                |                  | N    | <b>715.409714</b> | <b>358.208495</b> | 698.383165        | 349.695221       | 697.399149     | 349.203213       | 6 |
| 4 | 455.272492        | <b>228.139884</b> | 438.245943        | 219.626610       |                |                  | L    | <b>601.366787</b> | 301.187032        | <b>584.340238</b> | 292.673757       | 583.356222     | 292.181749       | 5 |
| 5 | 568.356556        | 284.681916        | 551.330007        | 276.168642       |                |                  | I    | <b>488.282723</b> | 244.644999        | 471.256174        | 236.131725       | 470.272158     | 235.639717       | 4 |
| 6 | 655.388584        | 328.197930        | 638.362035        | 319.684656       | 637.378019     | 319.192648       | S    | 375.198659        | 188.102967        | <b>358.172110</b> | 179.589693       | 357.188094     | 179.097685       | 3 |
| 7 | 768.436263        | 384.721770        | 751.409714        | 376.208495       | 750.425698     | 375.716487       | P    | <b>288.166631</b> | 144.586953        | 271.140082        | 136.073679       |                |                  | 2 |
| 8 |                   |                   |                   |                  |                |                  | R    | <b>175.118952</b> | 88.063114         | 158.092403        | 79.549839        |                |                  | 1 |

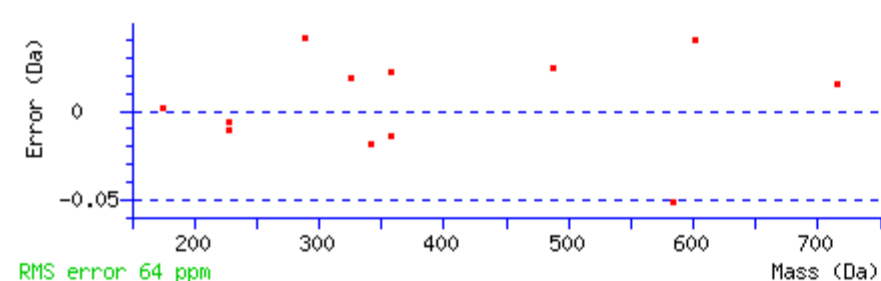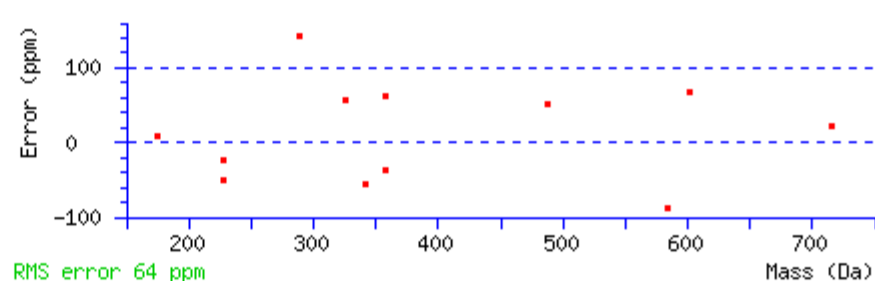

NCBI BLAST search of [ARNLISPR](#)

(Parameters: blastp, nr protein database, expect=20000, no filter, PAM30)

Other BLAST [web gateways](#)

## All matches to this query

| Score | Mr(calc):  | Delta     | Sequence                 |
|-------|------------|-----------|--------------------------|
| 33.0  | 941.540634 | 0.007214  | <a href="#">ARNLISPR</a> |
| 16.3  | 941.554550 | -0.006702 | <a href="#">IDHIAELR</a> |
| 15.8  | 941.540634 | 0.007214  | <a href="#">RGQIAELR</a> |
| 11.5  | 941.554581 | -0.006733 | <a href="#">VTLVLEPR</a> |
| 11.3  | 941.554550 | -0.006702 | <a href="#">EVIEALLR</a> |
| 10.4  | 941.554550 | -0.006702 | <a href="#">VLLEAIER</a> |
| 8.5   | 941.540634 | 0.007214  | <a href="#">PSRNLSLR</a> |
| 8.3   | 941.554565 | -0.006717 | <a href="#">DPLILLSR</a> |
| 8.3   | 941.544678 | 0.003170  | <a href="#">HGFLILSR</a> |
| 6.5   | 941.540634 | 0.007214  | <a href="#">VQRLEAAR</a> |

Mascot: <http://www.matrixscience.com/>

# MASCOT Search Results

## Peptide View

MS/MS Fragmentation of **AEEVATFFAK**

Found in **TOP1\_HUMAN**, DNA topoisomerase 1 OS=Homo sapiens GN=TOP1 PE=1 SV=2

Match to Query 23134: 1111.557768 from(556.786160,2+) rtinseconds(2589) index(30117)

Title: Locus:1.1.1.2625.20

Data file 2011-11-12 - TFD - EP 5-2.mgf

Click mouse within plot area to zoom in by factor of two about that point

Or, Plot from  to  Da

Label all possible matches  Label matches used for scoring

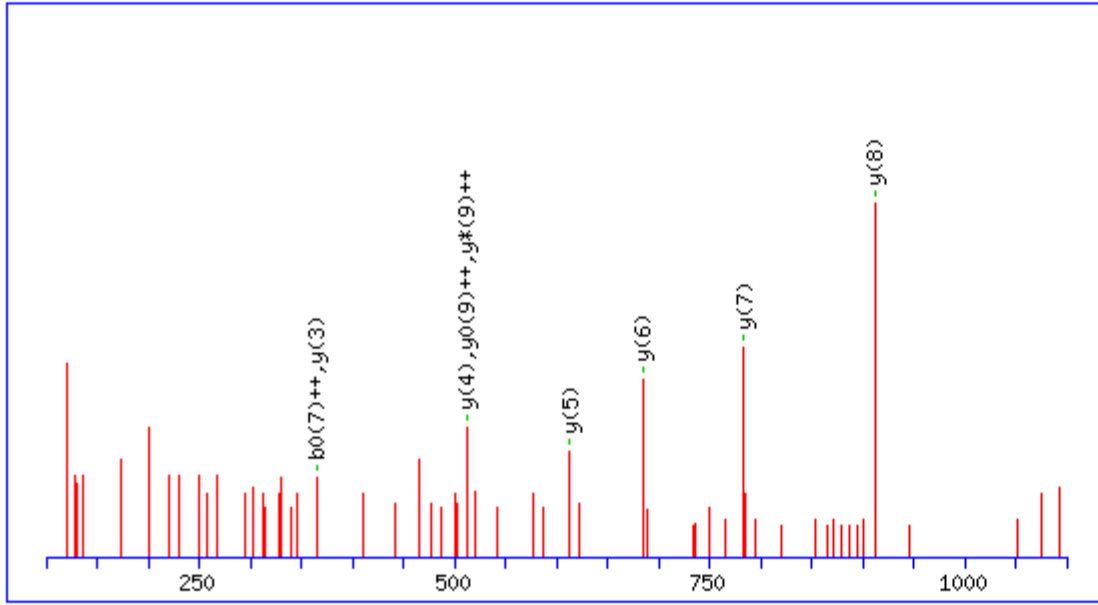

Monoisotopic mass of neutral peptide Mr(calc): 1111.554962

Fixed modifications: Propionamide (C) (apply to specified residues or termini only)

Ions Score: 41 Expect: 0.00067

Matches : 9/80 fragment ions using 10 most intense peaks ([help](#))

| #  | b          | b <sup>++</sup> | b <sup>0</sup> | b <sup>0++</sup> | Seq. | y           | y <sup>++</sup> | y <sup>*</sup> | y <sup>+++</sup> | y <sup>0</sup> | y <sup>0++</sup> | #  |
|----|------------|-----------------|----------------|------------------|------|-------------|-----------------|----------------|------------------|----------------|------------------|----|
| 1  | 72.044390  | 36.525833       |                |                  | A    |             |                 |                |                  |                |                  | 10 |
| 2  | 201.086983 | 101.047130      | 183.076418     | 92.041847        | E    | 1041.525139 | 521.266208      | 1024.498590    | 512.752933       | 1023.514574    | 512.260925       | 9  |
| 3  | 330.129576 | 165.568426      | 312.119011     | 156.563144       | E    | 912.482546  | 456.744911      | 895.455997     | 448.231637       | 894.471981     | 447.739629       | 8  |
| 4  | 429.197990 | 215.102633      | 411.187425     | 206.097351       | V    | 783.439953  | 392.223615      | 766.413404     | 383.710340       | 765.429388     | 383.218332       | 7  |
| 5  | 500.235104 | 250.621190      | 482.224539     | 241.615908       | A    | 684.371539  | 342.689408      | 667.344990     | 334.176133       | 666.360974     | 333.684125       | 6  |
| 6  | 601.282783 | 301.145030      | 583.272218     | 292.139747       | T    | 613.334425  | 307.170851      | 596.307876     | 298.657576       | 595.323860     | 298.165568       | 5  |
| 7  | 748.351197 | 374.679237      | 730.340632     | 365.673954       | F    | 512.286746  | 256.647011      | 495.260197     | 248.133737       |                |                  | 4  |
| 8  | 895.419611 | 448.213444      | 877.409046     | 439.208161       | F    | 365.218332  | 183.112804      | 348.191783     | 174.599529       |                |                  | 3  |
| 9  | 966.456725 | 483.732001      | 948.446160     | 474.726718       | A    | 218.149918  | 109.578597      | 201.123369     | 101.065322       |                |                  | 2  |
| 10 |            |                 |                |                  | K    | 147.112804  | 74.060040       | 130.086255     | 65.546765        |                |                  | 1  |

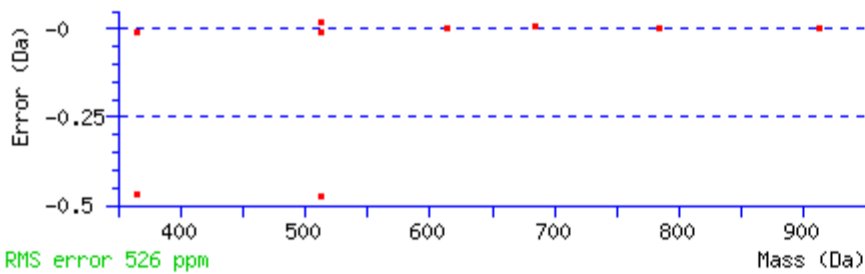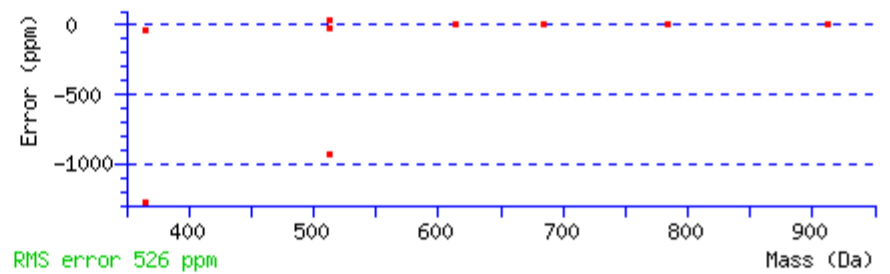

NCBI BLAST search of [AEEVATFFAK](#)

(Parameters: blastp, nr protein database, expect=20000, no filter, PAM30)

Other BLAST [web gateways](#)

All matches to this query

| Score | Mr(calc):   | Delta    | Sequence                   |
|-------|-------------|----------|----------------------------|
| 41.4  | 1111.554962 | 0.002806 | <a href="#">AEEVATFFAK</a> |

Mascot: <http://www.matrixscience.com/>

# MASCOT Search Results

## Peptide View

MS/MS Fragmentation of **AGDVEEDASQLIFPK**

Found in **RPB4\_HUMAN**, DNA-directed RNA polymerase II subunit RPB4 OS=Homo sapiens GN=POLR2D PE=1 SV=1

Match to Query 53551: 1617.785988 from(809.900270,2+) rtinseconds(3226) index(43671)

Title: Locus:1.1.1.2484.38

Data file 2011-11-10 - TFD - EP 4-6.mgf

Click mouse within plot area to zoom in by factor of two about that point

Or, Plot from  to  Da

Label all possible matches  Label matches used for scoring

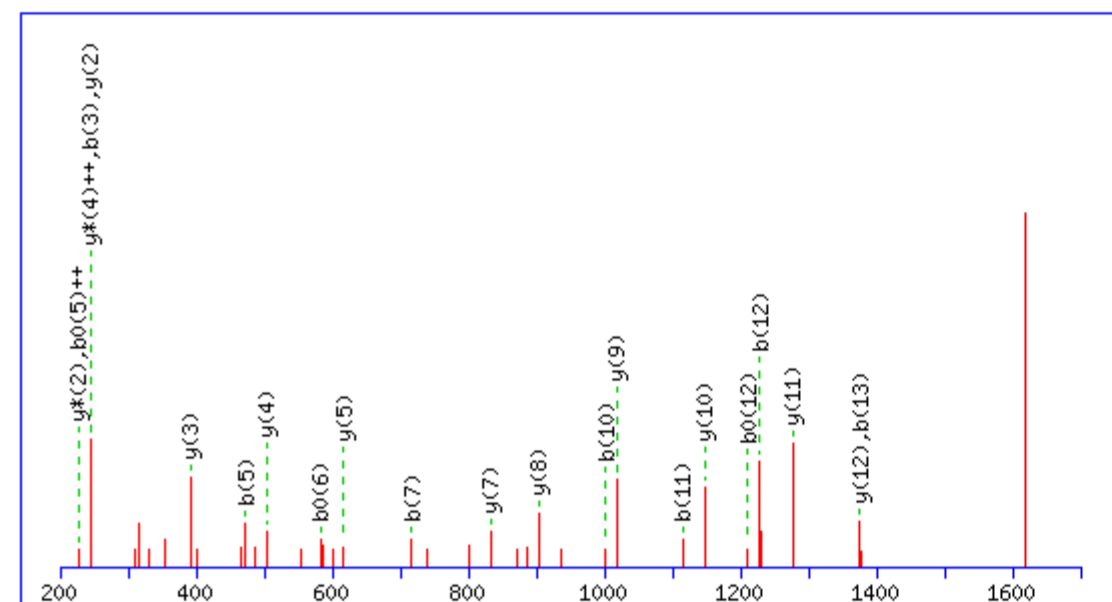

Monoisotopic mass of neutral peptide  $M_r(\text{calc})$ : 1617.788605

Fixed modifications: Propionamide (C) (apply to specified residues or termini only)

Ions Score: 77 Expect: 2.7e-007

Matches : 22/134 fragment ions using 29 most intense peaks [\(help\)](#)

| #  | b                  | b <sup>++</sup> | b <sup>*</sup> | b <sup>+++</sup> | b <sup>0</sup>     | b <sup>0++</sup>  | Seq. | y                  | y <sup>++</sup> | y <sup>*</sup>    | y <sup>+++</sup>  | y <sup>0</sup> | y <sup>0++</sup> | #  |
|----|--------------------|-----------------|----------------|------------------|--------------------|-------------------|------|--------------------|-----------------|-------------------|-------------------|----------------|------------------|----|
| 1  | 72.044390          | 36.525833       |                |                  |                    |                   | A    |                    |                 |                   |                   |                |                  | 15 |
| 2  | 129.065854         | 65.036565       |                |                  |                    |                   | G    | 1547.758780        | 774.383028      | 1530.732231       | 765.869754        | 1529.748215    | 765.377746       | 14 |
| 3  | <b>244.092797</b>  | 122.550037      |                |                  | 226.082232         | 113.544754        | D    | 1490.737316        | 745.872296      | 1473.710767       | 737.359022        | 1472.726751    | 736.867013       | 13 |
| 4  | 343.161211         | 172.084244      |                |                  | 325.150646         | 163.078961        | V    | <b>1375.710373</b> | 688.358825      | 1358.683824       | 679.845550        | 1357.699808    | 679.353542       | 12 |
| 5  | <b>472.203804</b>  | 236.605540      |                |                  | 454.193239         | <b>227.600258</b> | E    | <b>1276.641959</b> | 638.824618      | 1259.615410       | 630.311343        | 1258.631394    | 629.819335       | 11 |
| 6  | 601.246397         | 301.126837      |                |                  | <b>583.235832</b>  | 292.121554        | E    | <b>1147.599366</b> | 574.303321      | 1130.572817       | 565.790047        | 1129.588801    | 565.298039       | 10 |
| 7  | <b>716.273340</b>  | 358.640308      |                |                  | 698.262775         | 349.635026        | D    | <b>1018.556773</b> | 509.782025      | 1001.530224       | 501.268750        | 1000.546208    | 500.776742       | 9  |
| 8  | 787.310454         | 394.158865      |                |                  | 769.299889         | 385.153583        | A    | <b>903.529830</b>  | 452.268553      | 886.503281        | 443.755279        | 885.519265     | 443.263271       | 8  |
| 9  | 874.342482         | 437.674879      |                |                  | 856.331917         | 428.669597        | S    | <b>832.492716</b>  | 416.749996      | 815.466167        | 408.236722        | 814.482151     | 407.744714       | 7  |
| 10 | <b>1002.401060</b> | 501.704168      | 985.374511     | 493.190894       | 984.390495         | 492.698886        | Q    | 745.460688         | 373.233982      | 728.434139        | 364.720708        |                |                  | 6  |
| 11 | <b>1115.485124</b> | 558.246200      | 1098.458575    | 549.732926       | 1097.474559        | 549.240918        | L    | <b>617.402110</b>  | 309.204693      | 600.375561        | 300.691419        |                |                  | 5  |
| 12 | <b>1228.569188</b> | 614.788232      | 1211.542639    | 606.274958       | <b>1210.558623</b> | 605.782949        | I    | <b>504.318046</b>  | 252.662661      | 487.291497        | <b>244.149386</b> |                |                  | 4  |
| 13 | <b>1375.637602</b> | 688.322439      | 1358.611053    | 679.809165       | 1357.627037        | 679.317157        | F    | <b>391.233982</b>  | 196.120629      | 374.207433        | 187.607355        |                |                  | 3  |
| 14 | 1472.690366        | 736.848821      | 1455.663817    | 728.335547       | 1454.679801        | 727.843539        | P    | <b>244.165568</b>  | 122.586422      | <b>227.139019</b> | 114.073148        |                |                  | 2  |
| 15 |                    |                 |                |                  |                    |                   | K    | 147.112804         | 74.060040       | 130.086255        | 65.546765         |                |                  | 1  |

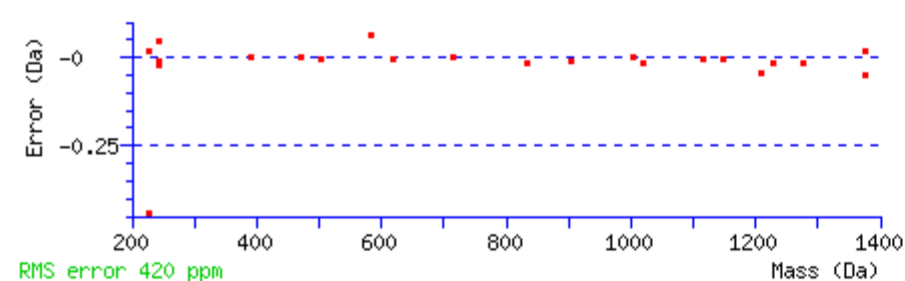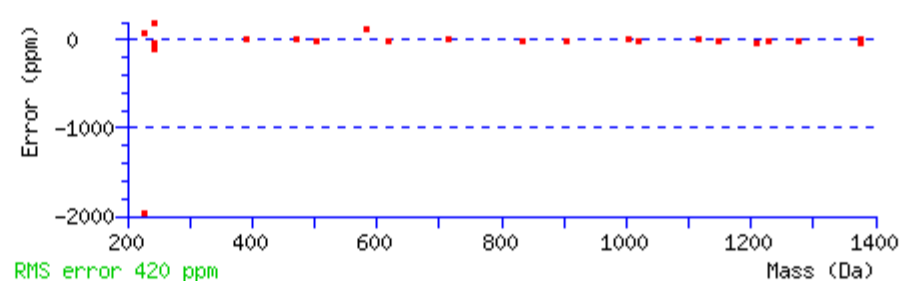

NCBI BLAST search of **AGDVEEDASQLIFPK**

(Parameters: blastp, nr protein database, expect=20000, no filter, PAM30)

Other BLAST [web gateways](#)

All matches to this query

| Score | $M_r(\text{calc})$ | Delta     | Sequence                         |
|-------|--------------------|-----------|----------------------------------|
| 76.8  | 1617.788605        | -0.002617 | <a href="#">AGDVEEDASQLIFPK</a>  |
| 9.3   | 1617.770874        | 0.015114  | <a href="#">YQVPPDCPPLVQK</a>    |
| 6.2   | 1617.785919        | 0.000069  | <a href="#">AAFQGAEGPRGGLESR</a> |
| 2.1   | 1617.785492        | 0.000496  | <a href="#">TITPGMVCAGVPQGGK</a> |
| 1.2   | 1617.785492        | 0.000496  | <a href="#">TITPGMVCAGVPQGGK</a> |
| 0.7   | 1617.800674        | -0.014686 | <a href="#">IYNISMKHPQEMK</a>    |
| 0.4   | 1617.786102        | -0.000114 | <a href="#">DQFALAMYFIQQK</a>    |
| 0.3   | 1617.785416        | 0.000572  | <a href="#">NPLMEMEPKALSAR</a>   |

# MASCOT SCIENCE Mascot Search Results

## Peptide View

MS/MS Fragmentation of **LFTEVEGTCTGK**

Found in **RPB7\_HUMAN**, DNA-directed RNA polymerase II subunit RPB7 OS=Homo sapiens GN=POLR2G PE=1 SV=1

Match to Query 42136: 1354.646608 from(678.330580,2+) rtinseconds(1940) index(19814)

Title: Locus:1.1.1.1957.46

Data file 2011-11-12 - TFD - EP 5-6.mgf

Click mouse within plot area to zoom in by factor of two about that point

Or, Plot from  to  Da

Label all possible matches  Label matches used for scoring

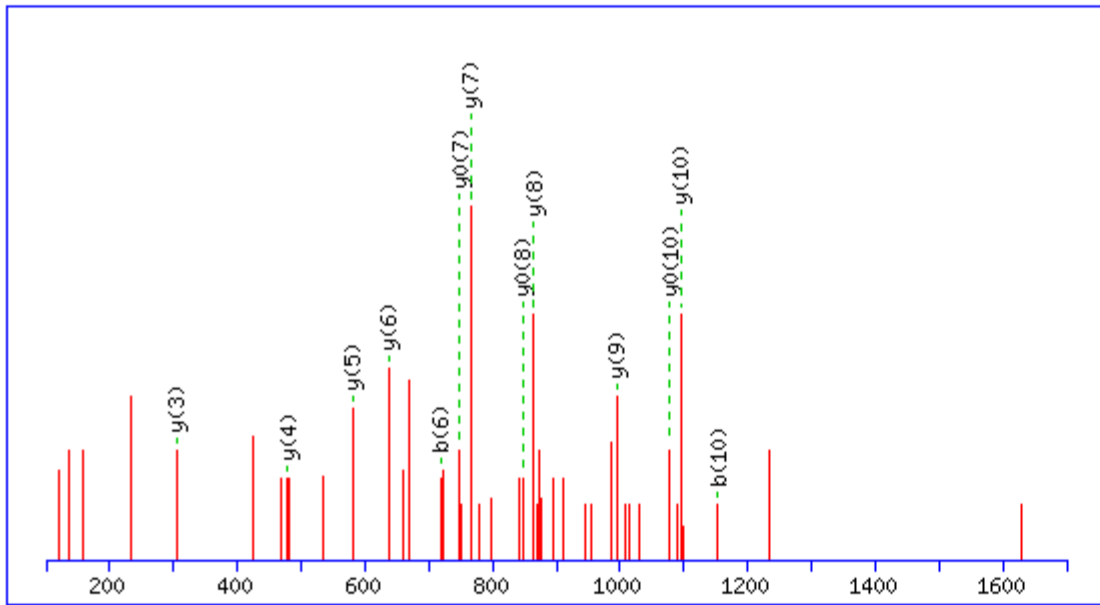

Monoisotopic mass of neutral peptide  $M_r(\text{calc})$ : 1354.643875

Fixed modifications: Propionamide (C) (apply to specified residues or termini only)

Ions Score: 43 Expect: 0.00067

Matches : 13/102 fragment ions using 33 most intense peaks [\(help\)](#)

| #  | b                  | b <sup>++</sup> | b <sup>0</sup> | b <sup>0++</sup> | Seq. | y                  | y <sup>++</sup> | y <sup>*</sup> | y <sup>*++</sup> | y <sup>0</sup>     | y <sup>0++</sup> | #  |
|----|--------------------|-----------------|----------------|------------------|------|--------------------|-----------------|----------------|------------------|--------------------|------------------|----|
| 1  | 114.091340         | 57.549308       |                |                  | L    |                    |                 |                |                  |                    |                  | 12 |
| 2  | 261.159754         | 131.083515      |                |                  | F    | 1242.567082        | 621.787179      | 1225.540533    | 613.273905       | 1224.556517        | 612.781897       | 11 |
| 3  | 362.207433         | 181.607354      | 344.196868     | 172.602072       | T    | <b>1095.498668</b> | 548.252972      | 1078.472119    | 539.739698       | <b>1077.488103</b> | 539.247690       | 10 |
| 4  | 491.250026         | 246.128651      | 473.239461     | 237.123369       | E    | <b>994.450989</b>  | 497.729133      | 977.424440     | 489.215858       | 976.440424         | 488.723850       | 9  |
| 5  | 590.318440         | 295.662858      | 572.307875     | 286.657576       | V    | <b>865.408396</b>  | 433.207836      | 848.381847     | 424.694562       | <b>847.397831</b>  | 424.202554       | 8  |
| 6  | <b>719.361033</b>  | 360.184155      | 701.350468     | 351.178872       | E    | <b>766.339982</b>  | 383.673629      | 749.313433     | 375.160355       | <b>748.329417</b>  | 374.668347       | 7  |
| 7  | 776.382497         | 388.694887      | 758.371932     | 379.689604       | G    | <b>637.297389</b>  | 319.152333      | 620.270840     | 310.639058       | 619.286824         | 310.147050       | 6  |
| 8  | 877.430176         | 439.218726      | 859.419611     | 430.213444       | T    | <b>580.275925</b>  | 290.641601      | 563.249376     | 282.128326       | 562.265360         | 281.636318       | 5  |
| 9  | 1051.476475        | 526.241876      | 1033.465910    | 517.236593       | C    | <b>479.228246</b>  | 240.117761      | 462.201697     | 231.604487       | 461.217681         | 231.112479       | 4  |
| 10 | <b>1152.524154</b> | 576.765715      | 1134.513589    | 567.760433       | T    | <b>305.181947</b>  | 153.094611      | 288.155398     | 144.581337       | 287.171382         | 144.089329       | 3  |
| 11 | 1209.545618        | 605.276447      | 1191.535053    | 596.271165       | G    | 204.134268         | 102.570772      | 187.107719     | 94.057497        |                    |                  | 2  |
| 12 |                    |                 |                |                  | K    | 147.112804         | 74.060040       | 130.086255     | 65.546765        |                    |                  | 1  |

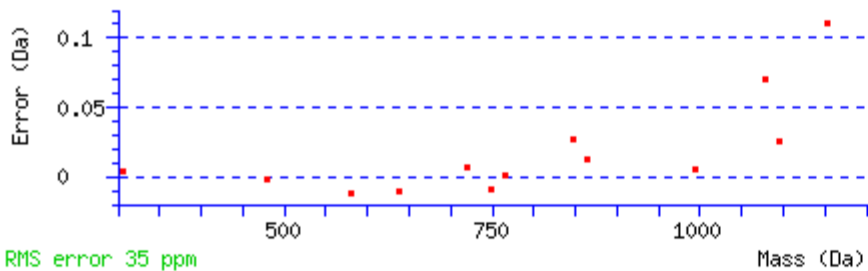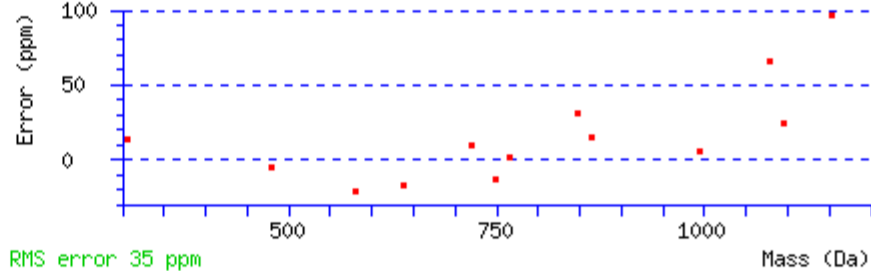

NCBI BLAST search of **LFTEVEGTCTGK**

(Parameters: blastp, nr protein database, expect=20000, no filter, PAM30)

Other BLAST [web gateways](#)

All matches to this query

| Score | $M_r(\text{calc})$ : | Delta    | Sequence                     |
|-------|----------------------|----------|------------------------------|
| 43.4  | 1354.643875          | 0.002733 | <a href="#">LFTEVEGTCTGK</a> |

Mascot: <http://www.matrixscience.com/>



# **MASCOT** Mascot Search Results

## Peptide View

MS/MS Fragmentation of **LLPDITLLEPVEGEAAEELSR**

Found in **RPAC1\_HUMAN**, DNA-directed RNA polymerases I and III subunit RPAC1 OS=Homo sapiens GN=POLR1C PE=1 SV=1

Match to Query 69907: 2293.212852 from(765.411560,3+) rtinseconds(4262) index(64971)

Title: Locus:1.1.1.2998.37

Data file 2011-11-14 - TFD - EP 8-4.mgf

Click mouse within plot area to zoom in by factor of two about that point

Or, Plot from  to  Da

Label all possible matches  Label matches used for scoring

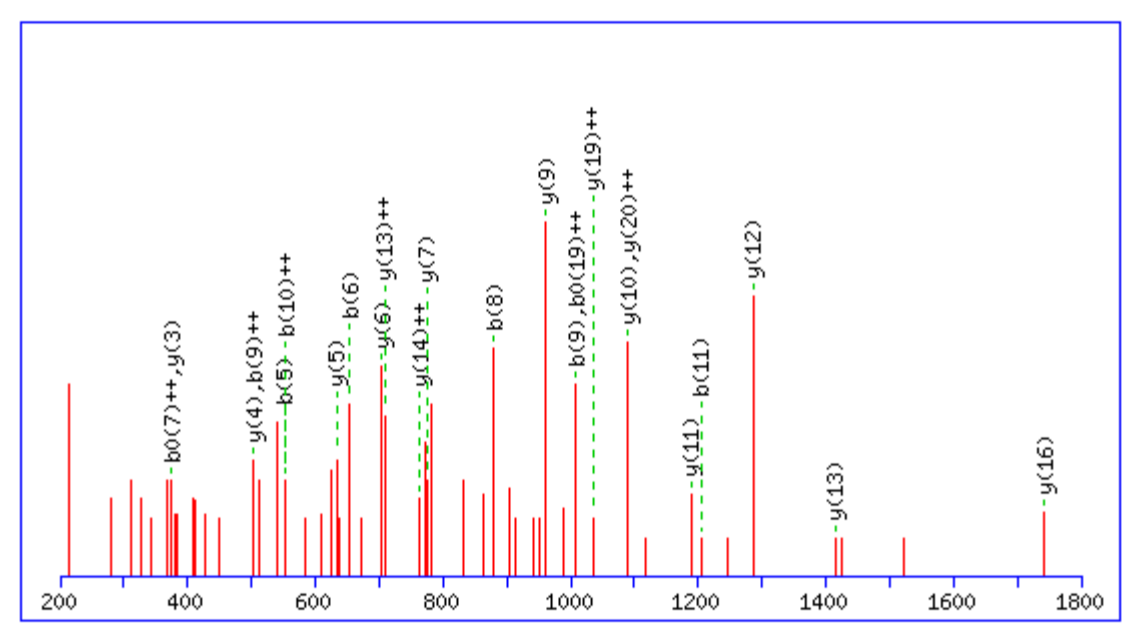

Monoisotopic mass of neutral peptide Mr(calc): 2293.205261

Fixed modifications: Propionamide (C) (apply to specified residues or termini only)

Ions Score: 55 Expect: 1.5e-005

Matches : 24/192 fragment ions using 42 most intense peaks [\(help\)](#)

| #  | b           | b <sup>++</sup> | b <sup>0</sup> | b <sup>0++</sup> | Seq. | y           | y <sup>++</sup> | y <sup>*</sup> | y <sup>+++</sup> | y <sup>0</sup> | y <sup>0++</sup> | #  |
|----|-------------|-----------------|----------------|------------------|------|-------------|-----------------|----------------|------------------|----------------|------------------|----|
| 1  | 114.091340  | 57.549308       |                |                  | L    |             |                 |                |                  |                |                  | 21 |
| 2  | 227.175404  | 114.091340      |                |                  | L    | 2181.128521 | 1091.067898     | 2164.101972    | 1082.554624      | 2163.117956    | 1082.062616      | 20 |
| 3  | 324.228168  | 162.617722      |                |                  | P    | 2068.044457 | 1034.525866     | 2051.017908    | 1026.012592      | 2050.033892    | 1025.520584      | 19 |
| 4  | 439.255111  | 220.131193      | 421.244546     | 211.125911       | D    | 1970.991693 | 985.999484      | 1953.965144    | 977.486210       | 1952.981128    | 976.994202       | 18 |
| 5  | 552.339175  | 276.673226      | 534.328610     | 267.667943       | I    | 1855.964750 | 928.486013      | 1838.938201    | 919.972738       | 1837.954185    | 919.480730       | 17 |
| 6  | 653.386854  | 327.197065      | 635.376289     | 318.191783       | T    | 1742.880686 | 871.943981      | 1725.854137    | 863.430707       | 1724.870121    | 862.938698       | 16 |
| 7  | 766.470918  | 383.739097      | 748.460353     | 374.733815       | L    | 1641.833007 | 821.420142      | 1624.806458    | 812.906867       | 1623.822442    | 812.414859       | 15 |
| 8  | 879.554982  | 440.281129      | 861.544417     | 431.275847       | L    | 1528.748943 | 764.878109      | 1511.722394    | 756.364835       | 1510.738378    | 755.872827       | 14 |
| 9  | 1008.597575 | 504.802426      | 990.587010     | 495.797143       | E    | 1415.664879 | 708.336077      | 1398.638330    | 699.822803       | 1397.654314    | 699.330795       | 13 |
| 10 | 1105.650339 | 553.328808      | 1087.639774    | 544.323525       | P    | 1286.622286 | 643.814781      | 1269.595737    | 635.301507       | 1268.611721    | 634.809499       | 12 |
| 11 | 1204.718753 | 602.863015      | 1186.708188    | 593.857732       | V    | 1189.569522 | 595.288399      | 1172.542973    | 586.775125       | 1171.558957    | 586.283117       | 11 |
| 12 | 1333.761346 | 667.384311      | 1315.750781    | 658.379029       | E    | 1090.501108 | 545.754192      | 1073.474559    | 537.240918       | 1072.490543    | 536.748909       | 10 |
| 13 | 1390.782810 | 695.895043      | 1372.772245    | 686.889760       | G    | 961.458515  | 481.232896      | 944.431966     | 472.719621       | 943.447950     | 472.227613       | 9  |
| 14 | 1519.825403 | 760.416340      | 1501.814838    | 751.411057       | E    | 904.437051  | 452.722164      | 887.410502     | 444.208889       | 886.426486     | 443.716881       | 8  |
| 15 | 1590.862517 | 795.934897      | 1572.851952    | 786.929614       | A    | 775.394458  | 388.200867      | 758.367909     | 379.687592       | 757.383893     | 379.195585       | 7  |
| 16 | 1661.899631 | 831.453454      | 1643.889066    | 822.448171       | A    | 704.357344  | 352.682310      | 687.330795     | 344.169036       | 686.346779     | 343.677028       | 6  |
| 17 | 1790.942224 | 895.974750      | 1772.931659    | 886.969468       | E    | 633.320230  | 317.163753      | 616.293681     | 308.650479       | 615.309665     | 308.158471       | 5  |
| 18 | 1919.984817 | 960.496047      | 1901.974252    | 951.490764       | E    | 504.277637  | 252.642456      | 487.251088     | 244.129182       | 486.267072     | 243.637174       | 4  |
| 19 | 2033.068881 | 1017.038079     | 2015.058316    | 1008.032796      | L    | 375.235044  | 188.121160      | 358.208495     | 179.607885       | 357.224479     | 179.115877       | 3  |
| 20 | 2120.100909 | 1060.554092     | 2102.090344    | 1051.548810      | S    | 262.150980  | 131.579128      | 245.124431     | 123.065853       | 244.140415     | 122.573845       | 2  |
| 21 |             |                 |                |                  | R    | 175.118952  | 88.063114       | 158.092403     | 79.549839        |                |                  | 1  |

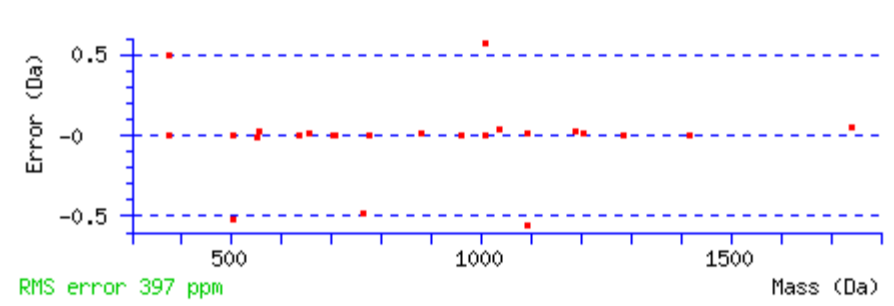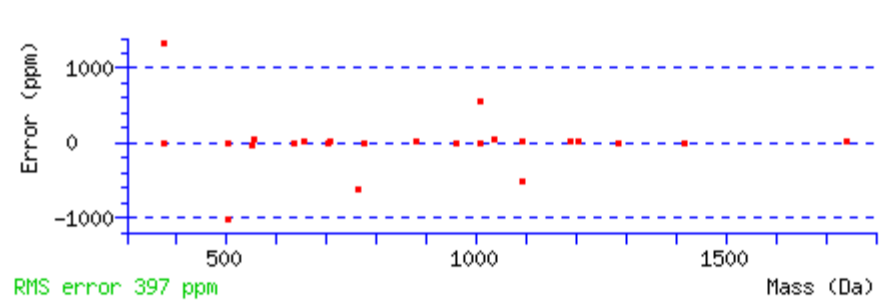

NCBI BLAST search of [LLPDITLLEPVEGEAAEELSR](#)

(Parameters: blastp, nr protein database, expect=20000, no filter, PAM30)

Other BLAST [web gateways](#)

### All matches to this query

| Score | Mr(calc):   | Delta    | Sequence                               |
|-------|-------------|----------|----------------------------------------|
| 55.5  | 2293.205261 | 0.007591 | <a href="#">LLPDITLLEPVEGEAAEELSR</a>  |
| 4.0   | 2293.206619 | 0.006233 | <a href="#">LPFSAAKSLINSPSQGAFSSLR</a> |

# MASCOT Search Results

## Peptide View

MS/MS Fragmentation of **ALIVVQQGMTPSAK**

Found in **RPABI\_HUMAN**, DNA-directed RNA polymerases I, II, and III subunit RPABC1 OS=Homo sapiens GN=POLR2E PE=1 SV=4

Match to Query 42240: 1457.795268 from(729.904910,2+) rtinseconds(1923) index(17010)

Title: Locus:1.1.1.2318.45

Data file 2011-11-12 - TFD - EP 5-5.mgf

Click mouse within plot area to zoom in by factor of two about that point

Or, Plot from  to  Da

Label all possible matches  Label matches used for scoring

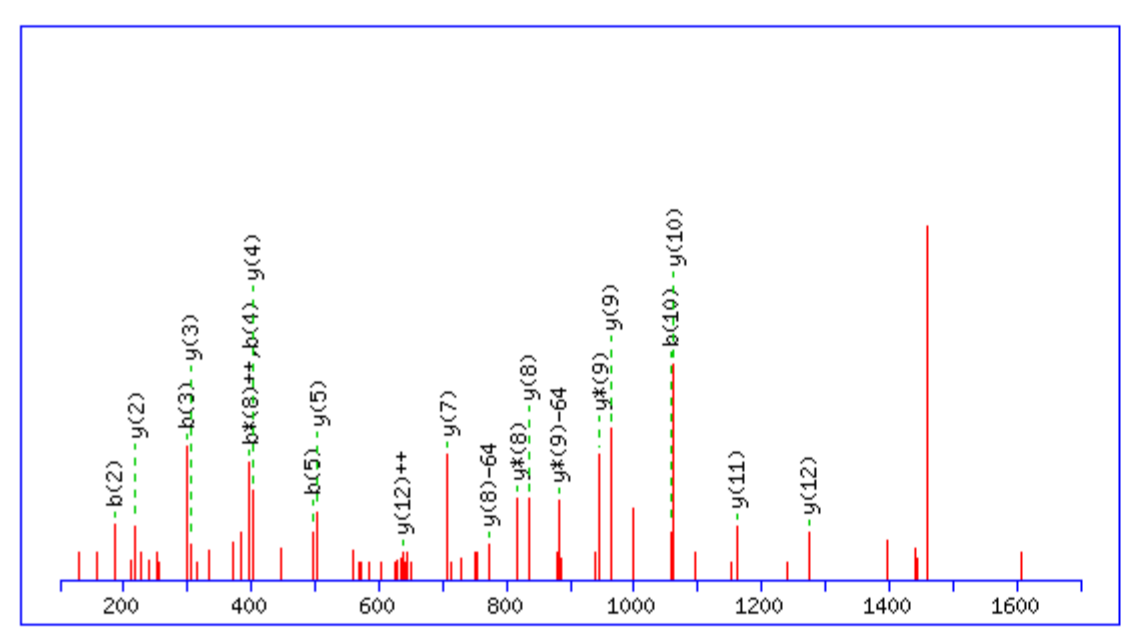

Monoisotopic mass of neutral peptide Mr(calc): 1457.791199

Fixed modifications: Propionamide (C) (apply to specified residues or termini only)

Variable modifications:

M9 : Oxidation (M), with neutral losses 0.000000 (shown in table), 63.998285

Ions Score: 83 Expect: 2.3e-008

Matches : 21/200 fragment ions using 27 most intense peaks [\(help\)](#)

| #  | b                  | b <sup>++</sup> | b <sup>*</sup> | b <sup>*++</sup>  | b <sup>0</sup> | b <sup>0++</sup> | Seq. | y                  | y <sup>++</sup>   | y <sup>*</sup>    | y <sup>*++</sup> | y <sup>0</sup> | y <sup>0++</sup> | #  |
|----|--------------------|-----------------|----------------|-------------------|----------------|------------------|------|--------------------|-------------------|-------------------|------------------|----------------|------------------|----|
| 1  | 72.044390          | 36.525833       |                |                   |                |                  | A    |                    |                   |                   |                  |                |                  | 14 |
| 2  | <b>185.128454</b>  | 93.067865       |                |                   |                |                  | L    | 1387.761365        | 694.384321        | 1370.734816       | 685.871046       | 1369.750800    | 685.379038       | 13 |
| 3  | <b>298.212518</b>  | 149.609897      |                |                   |                |                  | I    | <b>1274.677301</b> | <b>637.842289</b> | 1257.650752       | 629.329014       | 1256.666736    | 628.837006       | 12 |
| 4  | <b>397.280932</b>  | 199.144104      |                |                   |                |                  | V    | <b>1161.593237</b> | 581.300257        | 1144.566688       | 572.786982       | 1143.582672    | 572.294974       | 11 |
| 5  | <b>496.349346</b>  | 248.678311      |                |                   |                |                  | V    | <b>1062.524823</b> | 531.766050        | 1045.498274       | 523.252775       | 1044.514258    | 522.760767       | 10 |
| 6  | 624.407924         | 312.707600      | 607.381375     | 304.194326        |                |                  | Q    | <b>963.456409</b>  | 482.231843        | <b>946.429860</b> | 473.718568       | 945.445844     | 473.226560       | 9  |
| 7  | 752.466502         | 376.736889      | 735.439953     | 368.223615        |                |                  | Q    | <b>835.397831</b>  | 418.202554        | <b>818.371282</b> | 409.689279       | 817.387266     | 409.197271       | 8  |
| 8  | 809.487966         | 405.247621      | 792.461417     | <b>396.734347</b> |                |                  | G    | <b>707.339253</b>  | 354.173265        | 690.312704        | 345.659990       | 689.328688     | 345.167982       | 7  |
| 9  | 956.523366         | 478.765321      | 939.496817     | 470.252047        |                |                  | M    | 650.317789         | 325.662533        | 633.291240        | 317.149258       | 632.307224     | 316.657250       | 6  |
| 10 | <b>1057.571045</b> | 529.289161      | 1040.544496    | 520.775886        | 1039.560480    | 520.283878       | T    | <b>503.282389</b>  | 252.144833        | 486.255840        | 243.631558       | 485.271824     | 243.139550       | 5  |
| 11 | 1154.623809        | 577.815543      | 1137.597260    | 569.302268        | 1136.613244    | 568.810260       | P    | <b>402.234710</b>  | 201.620993        | 385.208161        | 193.107719       | 384.224145     | 192.615711       | 4  |
| 12 | 1241.655837        | 621.331557      | 1224.629288    | 612.818282        | 1223.645272    | 612.326274       | S    | <b>305.181946</b>  | 153.094611        | 288.155397        | 144.581337       | 287.171381     | 144.089329       | 3  |
| 13 | 1312.692951        | 656.850114      | 1295.666402    | 648.336839        | 1294.682386    | 647.844831       | A    | <b>218.149918</b>  | 109.578597        | 201.123369        | 101.065322       |                |                  | 2  |
| 14 |                    |                 |                |                   |                |                  | K    | 147.112804         | 74.060040         | 130.086255        | 65.546765        |                |                  | 1  |

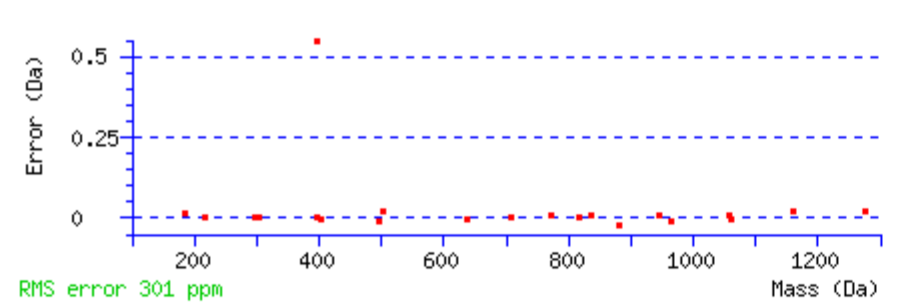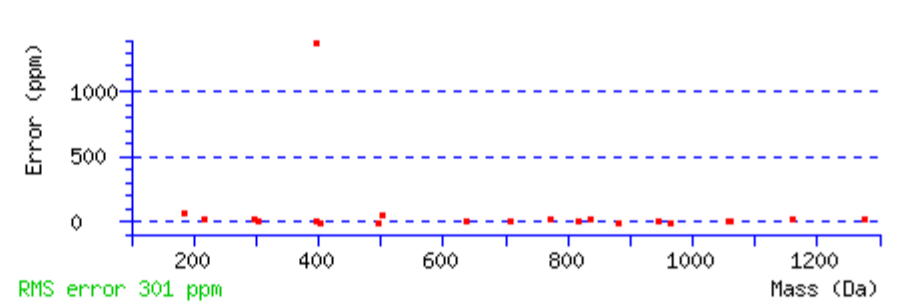

NCBI BLAST search of [ALIVVQQGMTPSAK](#)

(Parameters: blastp, nr protein database, expect=20000, no filter, PAM30)

Other BLAST [web gateways](#)

### All matches to this query

| Score | Mr(calc):   | Delta    | Sequence                       |
|-------|-------------|----------|--------------------------------|
| 82.6  | 1457.791199 | 0.004069 | <a href="#">ALIVVQQGMTPSAK</a> |
| 49.9  | 1457.791199 | 0.004069 | <a href="#">ALIVVQQGMTPSAK</a> |
| 1.1   | 1457.787796 | 0.007472 | <a href="#">EPAVERVIEFAAK</a>  |

# **MASCOT** Mascot Search Results

## Peptide View

MS/MS Fragmentation of **IEGDETSTEATR**

Found in **RPAB3\_HUMAN**, DNA-directed RNA polymerases I, II, and III subunit RPABC3 OS=Homo sapiens GN=POLR2H PE=1 SV=4

Match to Query 726547: 1378.626428 from(690.320490,2+) rtinseconds(1082) index(245331)

Title: Locus:1.1.1.853.38

Data file C:\Program Files (x86)\Matrix Science\Mascot Daemon\mgf3 TFD - Epitel - R2\mascot\_daemon\_merge.mgf

Click mouse within plot area to zoom in by factor of two about that point

Or, Plot from  to  Da

Label all possible matches  Label matches used for scoring

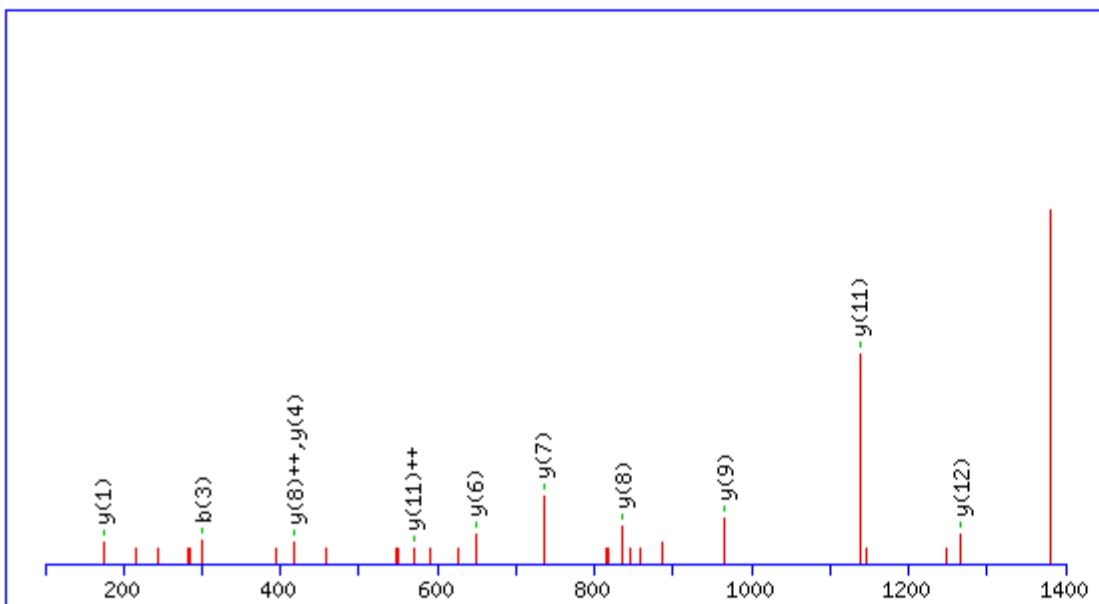

Monoisotopic mass of neutral peptide Mr(calc): 1378.621201

Fixed modifications: Carbamidomethyl (C) (apply to specified residues or termini only)

Ions Score: 80 Expect: 1.4e-007

Matches : 11/116 fragment ions using 10 most intense peaks [\(help\)](#)

| #  | b                 | b <sup>++</sup> | b <sup>0</sup> | b <sup>0++</sup> | Seq. | y                  | y <sup>++</sup>   | y <sup>*</sup> | y <sup>***</sup> | y <sup>0</sup> | y <sup>0++</sup> | #  |
|----|-------------------|-----------------|----------------|------------------|------|--------------------|-------------------|----------------|------------------|----------------|------------------|----|
| 1  | 114.091340        | 57.549308       |                |                  | I    |                    |                   |                |                  |                |                  | 13 |
| 2  | 243.133933        | 122.070605      | 225.123368     | 113.065322       | E    | <b>1266.544431</b> | 633.775854        | 1249.517882    | 625.262579       | 1248.533866    | 624.770571       | 12 |
| 3  | <b>300.155397</b> | 150.581336      | 282.144832     | 141.576054       | G    | <b>1137.501838</b> | <b>569.254557</b> | 1120.475289    | 560.741283       | 1119.491273    | 560.249275       | 11 |
| 4  | 415.182340        | 208.094808      | 397.171775     | 199.089526       | D    | 1080.480374        | 540.743825        | 1063.453825    | 532.230551       | 1062.469809    | 531.738543       | 10 |
| 5  | 544.224933        | 272.616105      | 526.214368     | 263.610822       | E    | <b>965.453431</b>  | 483.230354        | 948.426882     | 474.717079       | 947.442866     | 474.225071       | 9  |
| 6  | 645.272612        | 323.139944      | 627.262047     | 314.134662       | T    | <b>836.410838</b>  | <b>418.709057</b> | 819.384289     | 410.195783       | 818.400273     | 409.703775       | 8  |
| 7  | 732.304640        | 366.655958      | 714.294075     | 357.650676       | S    | <b>735.363159</b>  | 368.185218        | 718.336610     | 359.671943       | 717.352594     | 359.179935       | 7  |
| 8  | 833.352319        | 417.179798      | 815.341754     | 408.174515       | T    | <b>648.331131</b>  | 324.669204        | 631.304582     | 316.155929       | 630.320566     | 315.663921       | 6  |
| 9  | 962.394912        | 481.701094      | 944.384347     | 472.695812       | E    | 547.283452         | 274.145364        | 530.256903     | 265.632090       | 529.272887     | 265.140082       | 5  |
| 10 | 1033.432026       | 517.219651      | 1015.421461    | 508.214369       | A    | <b>418.240859</b>  | 209.624068        | 401.214310     | 201.110793       | 400.230294     | 200.618785       | 4  |
| 11 | 1104.469140       | 552.738208      | 1086.458575    | 543.732926       | A    | 347.203745         | 174.105510        | 330.177196     | 165.592236       | 329.193180     | 165.100228       | 3  |
| 12 | 1205.516819       | 603.262048      | 1187.506254    | 594.256765       | T    | 276.166631         | 138.586953        | 259.140082     | 130.073679       | 258.156066     | 129.581671       | 2  |
| 13 |                   |                 |                |                  | R    | <b>175.118952</b>  | 88.063114         | 158.092403     | 79.549839        |                |                  | 1  |

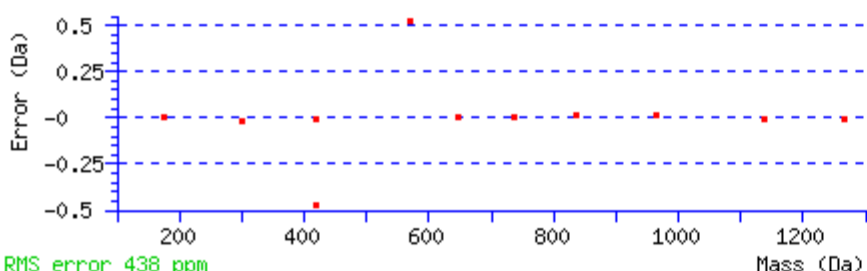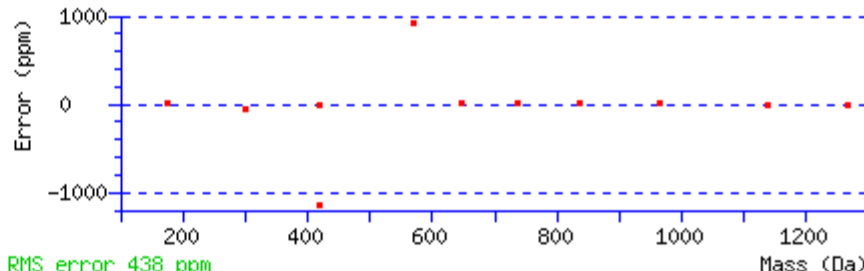

NCBI BLAST search of [IEGDETSTEATR](#)

(Parameters: blastp, nr protein database, expect=20000, no filter, PAM30)

Other BLAST [web gateways](#)

## All matches to this query

| Score | Mr(calc):   | Delta     | Sequence                       |
|-------|-------------|-----------|--------------------------------|
| 79.9  | 1378.621201 | 0.005227  | <a href="#">IEGDETSTEATR</a>   |
| 22.8  | 1378.617386 | 0.009042  | <a href="#">LESPTTPLLDDM</a>   |
| 3.9   | 1378.621185 | 0.005243  | <a href="#">VSKNDTEESNK</a>    |
| 2.1   | 1378.628601 | -0.002173 | <a href="#">IEGVGAATSAELDM</a> |
| 1.7   | 1378.628586 | -0.002158 | <a href="#">LEQPDLSSEMSK</a>   |
| 0.8   | 1378.626114 | 0.000314  | <a href="#">IEFCPGGAVDAIM</a>  |
| 0.7   | 1378.625229 | 0.001199  | <a href="#">LEESPDNDGFLK</a>   |
| 0.7   | 1378.628586 | -0.002158 | <a href="#">LEQPDLSSEMSK</a>   |
| 0.7   | 1378.628601 | -0.002173 | <a href="#">LETDISIQGEM</a>    |
| 0.5   | 1378.614670 | 0.011758  | <a href="#">EIDNSAACSSAVR</a>  |

Mascot: <http://www.matrixscience.com/>

# {MATRIX} SCIENCE Mascot Search Results

## Peptide View

MS/MS Fragmentation of **LLNYAPLEK**

Found in **RPABS\_HUMAN**, DNA-directed RNA polymerases I, II, and III subunit RPABC5 OS=Homo sapiens GN=POLR2L PE=1 SV=1

Match to Query 13747: 1059.588848 from(530.801700,2+) rtinseconds(2333) index(13745)

Title: Locus:1.1.1.2612.13

Data file 2011-11-14 - TFD - EP 8-8.mgf

Click mouse within plot area to zoom in by factor of two about that point

Or, Plot from  to  Da

Label all possible matches  Label matches used for scoring

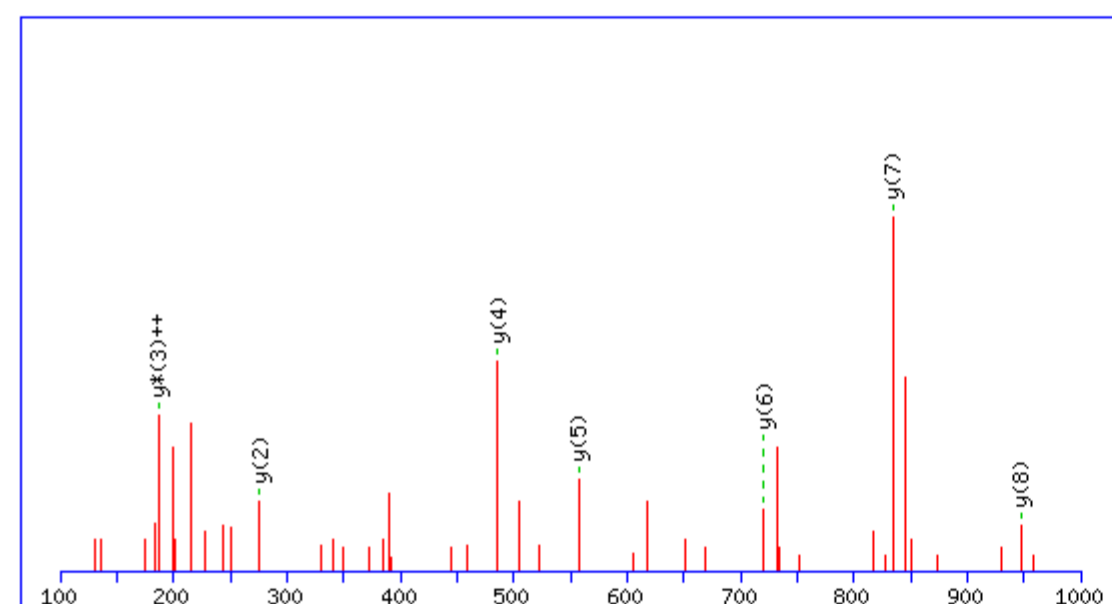

Monoisotopic mass of neutral peptide Mr(calc): 1059.596405

Fixed modifications: Propionamide (C) (apply to specified residues or termini only)

Ions Score: 52 Expect: 5.7e-005

Matches : 7/76 fragment ions using 9 most intense peaks ([help](#))

| # | b          | b <sup>++</sup> | b <sup>*</sup> | b <sup>*++</sup> | b <sup>0</sup> | b <sup>0++</sup> | Seq. | y                 | y <sup>++</sup> | y <sup>*</sup> | y <sup>*++</sup>  | y <sup>0</sup> | y <sup>0++</sup> | # |
|---|------------|-----------------|----------------|------------------|----------------|------------------|------|-------------------|-----------------|----------------|-------------------|----------------|------------------|---|
| 1 | 114.091340 | 57.549308       |                |                  |                |                  | L    |                   |                 |                |                   |                |                  | 9 |
| 2 | 227.175404 | 114.091340      |                |                  |                |                  | L    | <b>947.519659</b> | 474.263468      | 930.493110     | 465.750193        | 929.509094     | 465.258185       | 8 |
| 3 | 341.218331 | 171.112803      | 324.191782     | 162.599529       |                |                  | N    | <b>834.435595</b> | 417.721436      | 817.409046     | 409.208161        | 816.425030     | 408.716153       | 7 |
| 4 | 504.281660 | 252.644468      | 487.255111     | 244.131193       |                |                  | Y    | <b>720.392668</b> | 360.699972      | 703.366119     | 352.186698        | 702.382103     | 351.694690       | 6 |
| 5 | 575.318774 | 288.163025      | 558.292225     | 279.649751       |                |                  | A    | <b>557.329339</b> | 279.168308      | 540.302790     | 270.655033        | 539.318774     | 270.163025       | 5 |
| 6 | 672.371538 | 336.689407      | 655.344989     | 328.176133       |                |                  | P    | <b>486.292225</b> | 243.649751      | 469.265676     | 235.136476        | 468.281660     | 234.644468       | 4 |
| 7 | 785.455602 | 393.231439      | 768.429053     | 384.718165       |                |                  | L    | 389.239461        | 195.123369      | 372.212912     | <b>186.610094</b> | 371.228896     | 186.118086       | 3 |
| 8 | 914.498195 | 457.752736      | 897.471646     | 449.239461       | 896.487630     | 448.747453       | E    | <b>276.155397</b> | 138.581336      | 259.128848     | 130.068062        | 258.144832     | 129.576054       | 2 |
| 9 |            |                 |                |                  |                |                  | K    | 147.112804        | 74.060040       | 130.086255     | 65.546765         |                |                  | 1 |

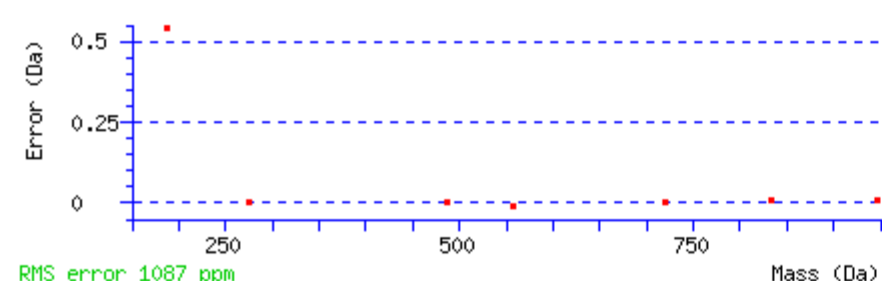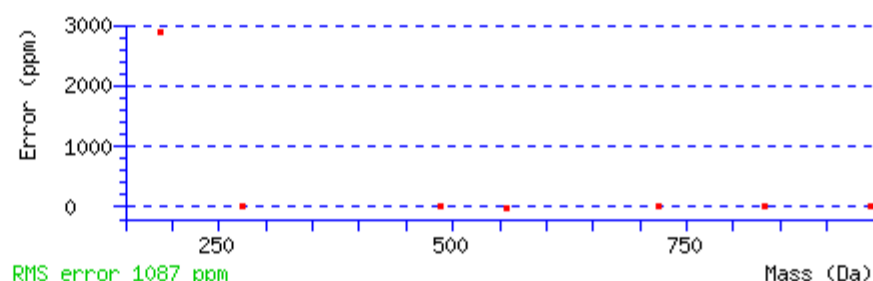

NCBI BLAST search of [LLNYAPLEK](#)

(Parameters: blastp, nr protein database, expect=20000, no filter, PAM30)

Other BLAST [web gateways](#)

## All matches to this query

| Score | Mr(calc):   | Delta     | Sequence                    |
|-------|-------------|-----------|-----------------------------|
| 52.0  | 1059.596405 | -0.007557 | <a href="#">LLNYAPLEK</a>   |
| 18.3  | 1059.581177 | 0.007671  | <a href="#">LLTQEVTEK</a>   |
| 14.5  | 1059.581177 | 0.007671  | <a href="#">ITKPTIDEK</a>   |
| 7.4   | 1059.581161 | 0.007687  | <a href="#">LLSAGTIEEK</a>  |
| 5.5   | 1059.596451 | -0.007603 | <a href="#">LLPAVTFD GK</a> |
| 5.3   | 1059.596420 | -0.007572 | <a href="#">ILPGEKPYK</a>   |
| 0.9   | 1059.585876 | 0.002972  | <a href="#">CRSLTGKPK</a>   |

Mascot: <http://www.matrixscience.com/>

# Mascot Search Results

## Peptide View

MS/MS Fragmentation of **SVSTSTTFVQGR**

Found in **DNJB2\_HUMAN**, DnaJ homolog subfamily B member 2 OS=Homo sapiens GN=DNAJB2 PE=2 SV=3

Match to Query 34435: 1268.635828 from(635.325190,2+) rtinseconds(1592) index(14331)

Title: Locus:1.1.1.2024.45

Data file 2011-11-12 - TFD - EP 5-4.mgf

Click mouse within plot area to zoom in by factor of two about that point

Or, Plot from  to  Da

Label all possible matches  Label matches used for scoring

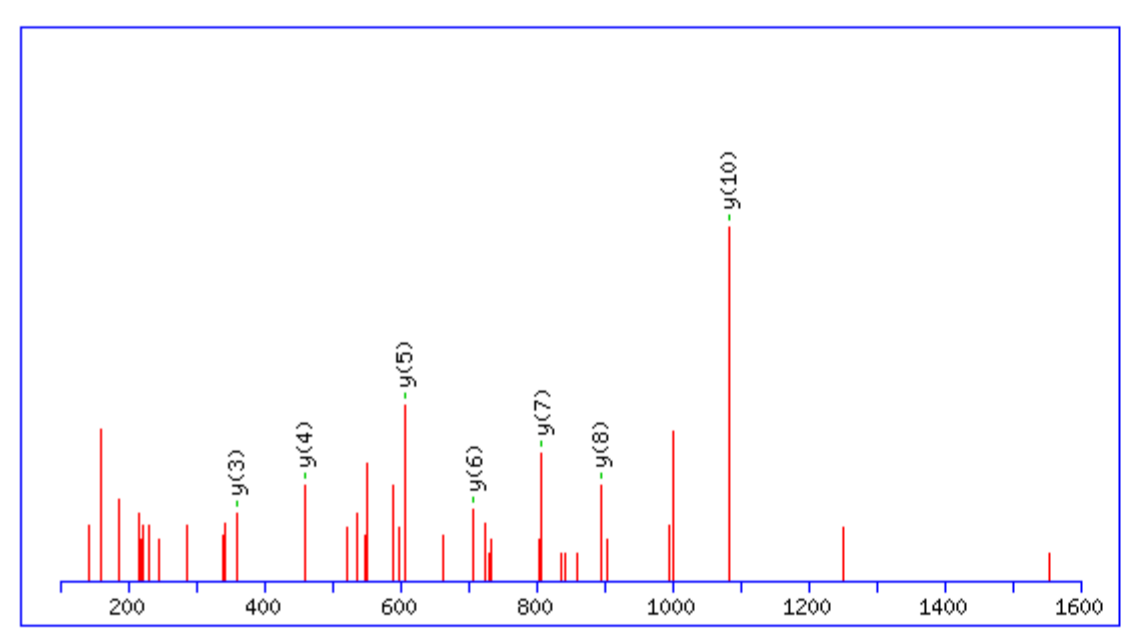

Monoisotopic mass of neutral peptide Mr(calc): 1268.636108

Fixed modifications: Propionamide (C) (apply to specified residues or termini only)

Ions Score: 57 Expect: 4.8e-006

Matches : 7/104 fragment ions using 11 most intense peaks [\(help\)](#)

| #  | b           | b <sup>++</sup> | b <sup>*</sup> | b <sup>*++</sup> | b <sup>0</sup> | b <sup>0++</sup> | Seq. | y                  | y <sup>++</sup> | y <sup>*</sup> | y <sup>*++</sup> | y <sup>0</sup> | y <sup>0++</sup> | #  |
|----|-------------|-----------------|----------------|------------------|----------------|------------------|------|--------------------|-----------------|----------------|------------------|----------------|------------------|----|
| 1  | 88.039304   | 44.523290       |                |                  | 70.028739      | 35.518008        | S    |                    |                 |                |                  |                |                  | 12 |
| 2  | 187.107718  | 94.057497       |                |                  | 169.097153     | 85.052214        | V    | 1182.611329        | 591.809302      | 1165.584780    | 583.296028       | 1164.600764    | 582.804020       | 11 |
| 3  | 274.139746  | 137.573511      |                |                  | 256.129181     | 128.568229       | S    | <b>1083.542915</b> | 542.275096      | 1066.516366    | 533.761821       | 1065.532350    | 533.269813       | 10 |
| 4  | 375.187425  | 188.097351      |                |                  | 357.176860     | 179.092068       | T    | 996.510887         | 498.759081      | 979.484338     | 490.245807       | 978.500322     | 489.753799       | 9  |
| 5  | 462.219453  | 231.613364      |                |                  | 444.208888     | 222.608082       | S    | <b>895.463208</b>  | 448.235242      | 878.436659     | 439.721967       | 877.452643     | 439.229959       | 8  |
| 6  | 563.267132  | 282.137204      |                |                  | 545.256567     | 273.131922       | T    | <b>808.431180</b>  | 404.719228      | 791.404631     | 396.205953       | 790.420615     | 395.713945       | 7  |
| 7  | 664.314811  | 332.661044      |                |                  | 646.304246     | 323.655761       | T    | <b>707.383501</b>  | 354.195388      | 690.356952     | 345.682114       | 689.372936     | 345.190106       | 6  |
| 8  | 811.383225  | 406.195251      |                |                  | 793.372660     | 397.189968       | F    | <b>606.335822</b>  | 303.671549      | 589.309273     | 295.158274       |                |                  | 5  |
| 9  | 910.451639  | 455.729458      |                |                  | 892.441074     | 446.724175       | V    | <b>459.267408</b>  | 230.137342      | 442.240859     | 221.624067       |                |                  | 4  |
| 10 | 1038.510217 | 519.758747      | 1021.483668    | 511.245472       | 1020.499652    | 510.753464       | Q    | <b>360.198994</b>  | 180.603135      | 343.172445     | 172.089860       |                |                  | 3  |
| 11 | 1095.531681 | 548.269478      | 1078.505132    | 539.756204       | 1077.521116    | 539.264196       | G    | 232.140416         | 116.573846      | 215.113867     | 108.060571       |                |                  | 2  |
| 12 |             |                 |                |                  |                |                  | R    | 175.118952         | 88.063114       | 158.092403     | 79.549839        |                |                  | 1  |

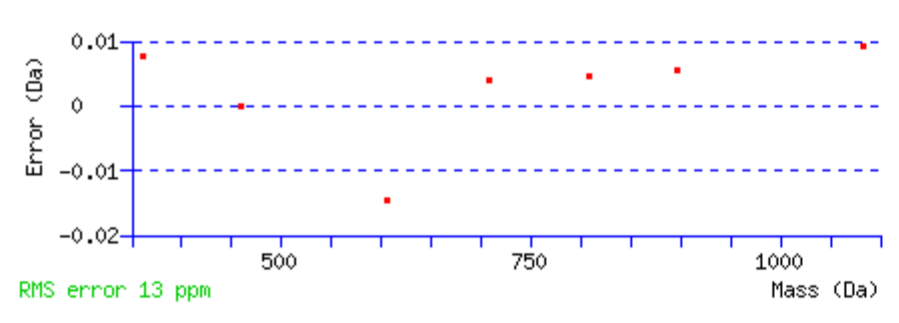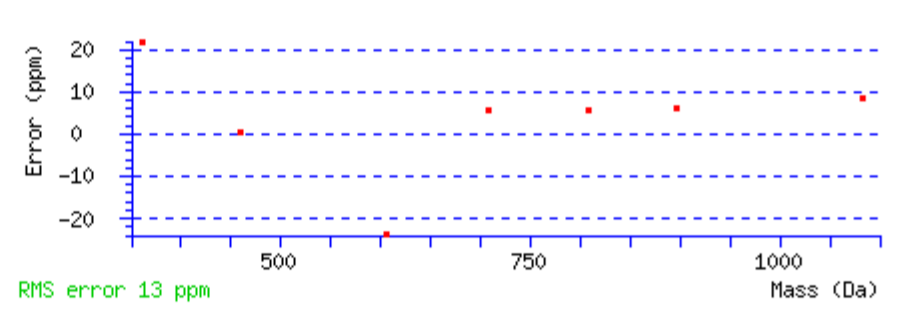

NCBI BLAST search of [SVSTSTTFVQGR](#)

(Parameters: blastp, nr protein database, expect=20000, no filter, PAM30)

Other BLAST [web gateways](#)

### All matches to this query

| Score | Mr(calc):   | Delta     | Sequence                     |
|-------|-------------|-----------|------------------------------|
| 57.4  | 1268.636108 | -0.000280 | <a href="#">SVSTSTTFVQGR</a> |
| 0.7   | 1268.624847 | 0.010981  | <a href="#">GEGPEVDVNLPK</a> |
| 0.4   | 1268.647293 | -0.011465 | <a href="#">EGSLPAPAARPR</a> |

# MASCOT Search Results

## Peptide View

MS/MS Fragmentation of **QVAEAYEVLSDAK**

Found in **DNJB3\_HUMAN**, DnaJ homolog subfamily B member 3 OS=Homo sapiens GN=DNAJB3 PE=1 SV=1

Match to Query 40686: 1421.702088 from(711.858320,2+) rtinseconds(2499) index(27941)

Title: Locus:1.1.1.2537.43

Data file 2011-11-12 - TFD - EP 5-5.mgf

Click mouse within plot area to zoom in by factor of two about that point

Or, Plot from  to  Da

Label all possible matches  Label matches used for scoring

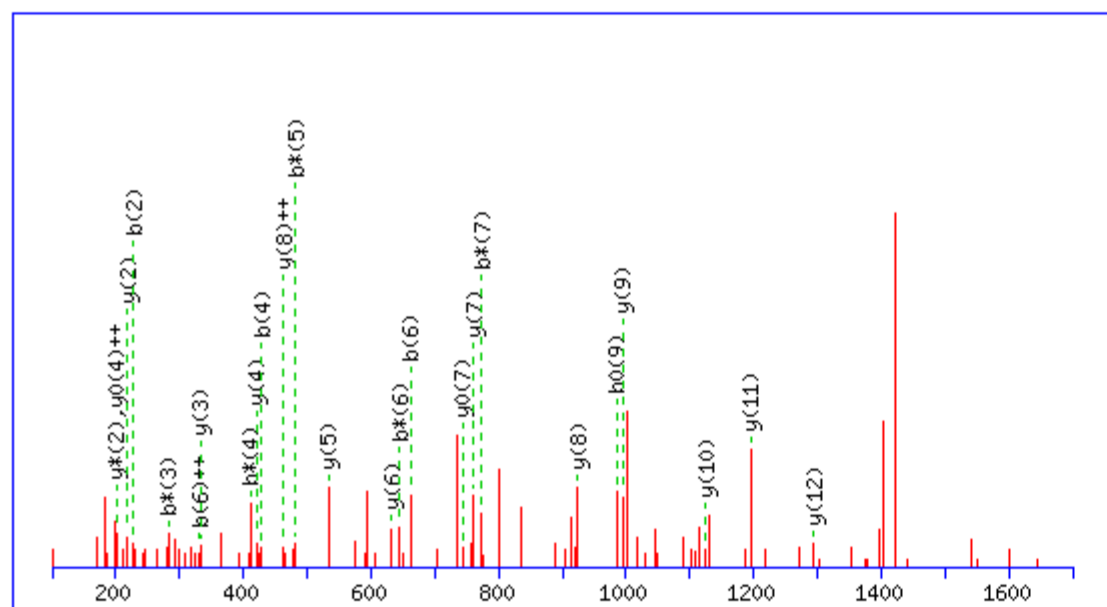

Monoisotopic mass of neutral peptide Mr(calc): 1421.703796

Fixed modifications: Propionamide (C) (apply to specified residues or termini only)

Ions Score: 56 Expect: 3.2e-005

Matches : 25/134 fragment ions using 63 most intense peaks [\(help\)](#)

| #  | b                 | b <sup>++</sup>   | b <sup>*</sup>    | b <sup>*++</sup> | b <sup>0</sup>    | b <sup>0++</sup> | Seq. | y                  | y <sup>++</sup>   | y <sup>*</sup>    | y <sup>*++</sup> | y <sup>0</sup>    | y <sup>0++</sup>  | #  |
|----|-------------------|-------------------|-------------------|------------------|-------------------|------------------|------|--------------------|-------------------|-------------------|------------------|-------------------|-------------------|----|
| 1  | 129.065854        | 65.036565         | 112.039305        | 56.523291        |                   |                  | Q    |                    |                   |                   |                  |                   |                   | 13 |
| 2  | <b>228.134268</b> | 114.570772        | 211.107719        | 106.057498       |                   |                  | V    | <b>1294.652524</b> | 647.829900        | 1277.625975       | 639.316626       | 1276.641959       | 638.824618        | 12 |
| 3  | 299.171382        | 150.089329        | <b>282.144833</b> | 141.576055       |                   |                  | A    | <b>1195.584110</b> | 598.295693        | 1178.557561       | 589.782419       | 1177.573545       | 589.290411        | 11 |
| 4  | <b>428.213975</b> | 214.610626        | <b>411.187426</b> | 206.097351       | 410.203410        | 205.605343       | E    | <b>1124.546996</b> | 562.777136        | 1107.520447       | 554.263862       | 1106.536431       | 553.771854        | 10 |
| 5  | 499.251089        | 250.129183        | <b>482.224540</b> | 241.615908       | 481.240524        | 241.123900       | A    | <b>995.504403</b>  | 498.255840        | 978.477854        | 489.742565       | 977.493838        | 489.250557        | 9  |
| 6  | <b>662.314418</b> | <b>331.660847</b> | <b>645.287869</b> | 323.147573       | 644.303853        | 322.655565       | Y    | <b>924.467289</b>  | <b>462.737283</b> | 907.440740        | 454.224008       | 906.456724        | 453.732000        | 8  |
| 7  | 791.357011        | 396.182144        | <b>774.330462</b> | 387.668869       | 773.346446        | 387.176861       | E    | <b>761.403960</b>  | 381.205618        | 744.377411        | 372.692344       | <b>743.393395</b> | 372.200336        | 7  |
| 8  | 890.425425        | 445.716351        | 873.398876        | 437.203076       | 872.414860        | 436.711068       | V    | <b>632.361367</b>  | 316.684322        | 615.334818        | 308.171047       | 614.350802        | 307.679039        | 6  |
| 9  | 1003.509489       | 502.258383        | 986.482940        | 493.745108       | <b>985.498924</b> | 493.253100       | L    | <b>533.292953</b>  | 267.150115        | 516.266404        | 258.636840       | 515.282388        | 258.144832        | 5  |
| 10 | 1090.541517       | 545.774397        | 1073.514968       | 537.261122       | 1072.530952       | 536.769114       | S    | <b>420.208889</b>  | 210.608082        | 403.182340        | 202.094808       | 402.198324        | <b>201.602800</b> | 4  |
| 11 | 1205.568460       | 603.287868        | 1188.541911       | 594.774594       | 1187.557895       | 594.282586       | D    | <b>333.176861</b>  | 167.092069        | 316.150312        | 158.578794       | 315.166296        | 158.086786        | 3  |
| 12 | 1276.605574       | 638.806425        | 1259.579025       | 630.293151       | 1258.595009       | 629.801143       | A    | <b>218.149918</b>  | 109.578597        | <b>201.123369</b> | 101.065322       |                   |                   | 2  |
| 13 |                   |                   |                   |                  |                   |                  | K    | 147.112804         | 74.060040         | 130.086255        | 65.546765        |                   |                   | 1  |

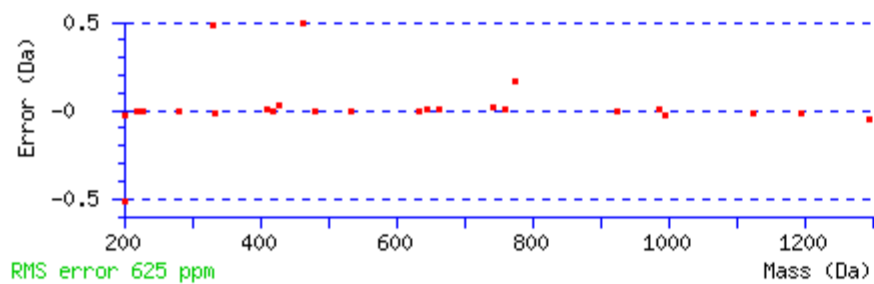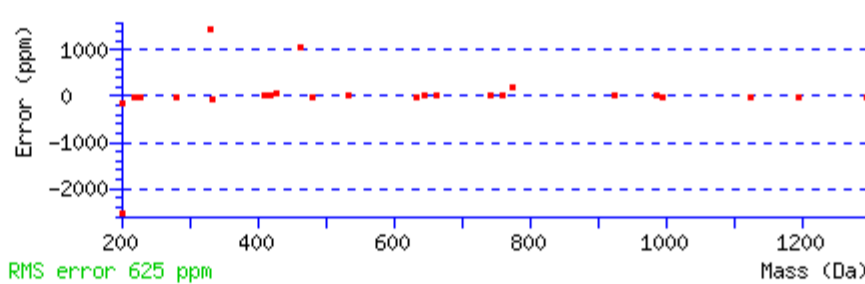

NCBI BLAST search of **QVAEAYEVLSDAK**

(Parameters: blastp, nr protein database, expect=20000, no filter, PAM30)

Other BLAST [web gateways](#)

All matches to this query

| Score | Mr(calc):   | Delta     | Sequence                      |
|-------|-------------|-----------|-------------------------------|
| 56.3  | 1421.703796 | -0.001708 | <a href="#">QVAEAYEVLSDAK</a> |

Mascot: <http://www.matrixscience.com/>

# **MASCOT** Mascot Search Results

## Peptide View

MS/MS Fragmentation of **LDLEARER**

Found in **DJC17\_HUMAN**, DnaJ homolog subfamily C member 17 OS=Homo sapiens GN=DNAJC17 PE=1 SV=1

Match to Query 15769: 1000.529008 from(501.271780,2+) rtinseconds(2172) index(25059)

Title: Locus:1.1.1.2175.14

Data file 2011-11-10 - TFD - EP 4-1.mgf

Click mouse within plot area to zoom in by factor of two about that point

Or, Plot from  to  Da

Label all possible matches  Label matches used for scoring

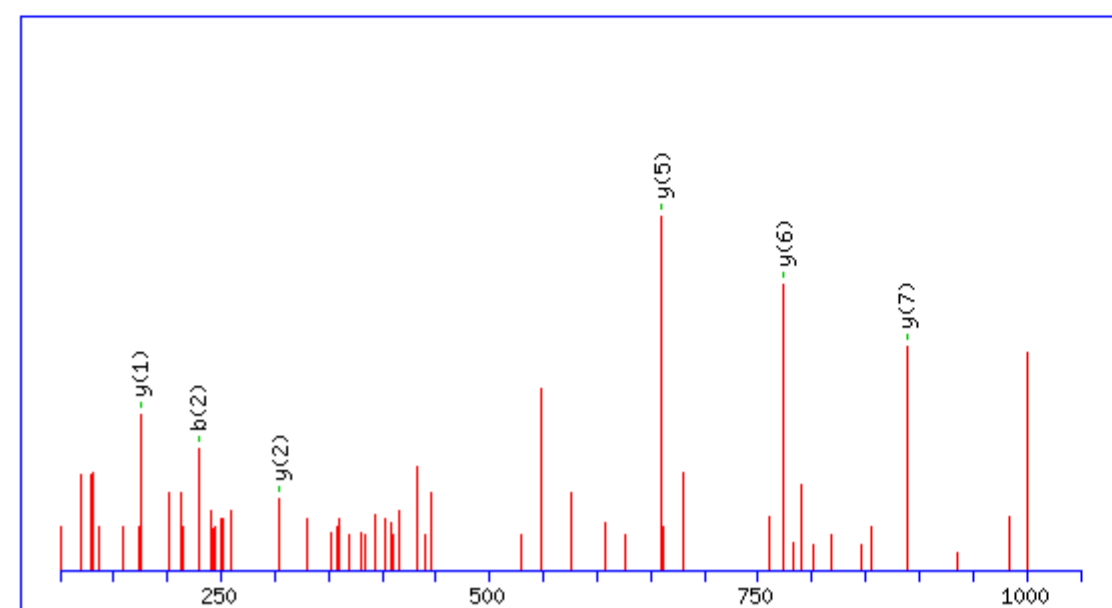

Monoisotopic mass of neutral peptide Mr(calc): 1000.530121

Fixed modifications: Propionamide (C) (apply to specified residues or termini only)

Ions Score: 36 Expect: 0.0037

Matches : 6/70 fragment ions using 9 most intense peaks [\(help\)](#)

| # | b                 | b <sup>++</sup> | b <sup>*</sup> | b <sup>***</sup> | b <sup>0</sup> | b <sup>0++</sup> | Seq. | y                 | y <sup>++</sup> | y <sup>*</sup> | y <sup>***</sup> | y <sup>0</sup> | y <sup>0++</sup> | # |
|---|-------------------|-----------------|----------------|------------------|----------------|------------------|------|-------------------|-----------------|----------------|------------------|----------------|------------------|---|
| 1 | 114.091340        | 57.549308       |                |                  |                |                  | L    |                   |                 |                |                  |                |                  | 8 |
| 2 | <b>229.118283</b> | 115.062779      |                |                  | 211.107718     | 106.057497       | D    | <b>888.453370</b> | 444.730323      | 871.426821     | 436.217049       | 870.442805     | 435.725041       | 7 |
| 3 | 342.202347        | 171.604811      |                |                  | 324.191782     | 162.599529       | L    | <b>773.426427</b> | 387.216852      | 756.399878     | 378.703577       | 755.415862     | 378.211569       | 6 |
| 4 | 471.244940        | 236.126108      |                |                  | 453.234375     | 227.120826       | E    | <b>660.342363</b> | 330.674820      | 643.315814     | 322.161545       | 642.331798     | 321.669537       | 5 |
| 5 | 542.282054        | 271.644665      |                |                  | 524.271489     | 262.639383       | A    | 531.299770        | 266.153523      | 514.273221     | 257.640249       | 513.289205     | 257.148241       | 4 |
| 6 | 698.383165        | 349.695221      | 681.356616     | 341.181946       | 680.372600     | 340.689938       | R    | 460.262656        | 230.634966      | 443.236107     | 222.121692       | 442.252091     | 221.629684       | 3 |
| 7 | 827.425758        | 414.216517      | 810.399209     | 405.703242       | 809.415193     | 405.211234       | E    | <b>304.161545</b> | 152.584411      | 287.134996     | 144.071136       | 286.150980     | 143.579128       | 2 |
| 8 |                   |                 |                |                  |                |                  | R    | <b>175.118952</b> | 88.063114       | 158.092403     | 79.549840        |                |                  | 1 |

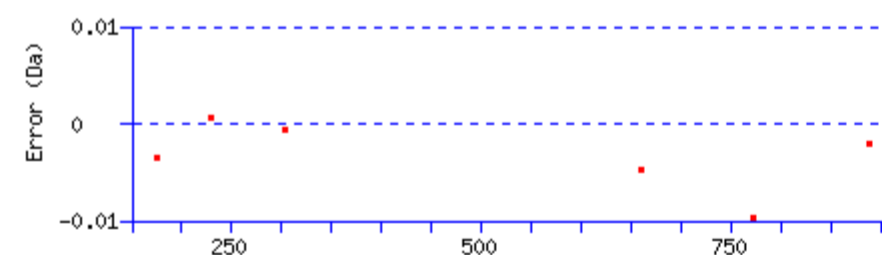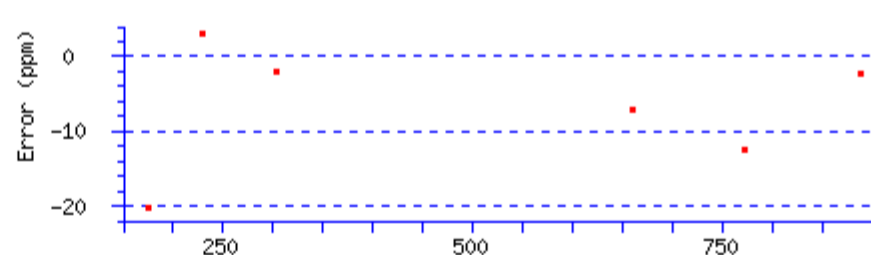

NCBI BLAST search of **LDLEARER**

(Parameters: blastp, nr protein database, expect=20000, no filter, PAM30)

Other BLAST [web gateways](#)

## All matches to this query

| Score | Mr(calc):   | Delta     | Sequence                   |
|-------|-------------|-----------|----------------------------|
| 35.7  | 1000.530121 | -0.001113 | <a href="#">LDLEARER</a>   |
| 10.0  | 1000.534180 | -0.005172 | <a href="#">LDQPFIPR</a>   |
| 10.0  | 1000.534180 | -0.005172 | <a href="#">LDQPFIPR</a>   |
| 9.2   | 1000.530136 | -0.001128 | <a href="#">DPSLLRER</a>   |
| 8.8   | 1000.530121 | -0.001113 | <a href="#">VLEERAER</a>   |
| 6.6   | 1000.530136 | -0.001128 | <a href="#">KPLSQQER</a>   |
| 6.3   | 1000.530151 | -0.001143 | <a href="#">AVAGQGELTR</a> |
| 5.9   | 1000.530151 | -0.001143 | <a href="#">SPKPSGLQR</a>  |
| 3.1   | 1000.530121 | -0.001113 | <a href="#">QALNEISAR</a>  |
| 1.2   | 1000.530136 | -0.001128 | <a href="#">NAGETLLQR</a>  |

# MASCOT Search Results

## Peptide View

MS/MS Fragmentation of **SSLNPILFR**

Found in **OST48\_HUMAN**, Dolichyl-diphosphooligosaccharide--protein glycosyltransferase 48 kDa subunit OS=Homo sapiens GN=DDOST PE=1 SV=4

Match to Query 17822: 1045.589108 from(523.801830,2+) rtinseconds(2810) index(38603)

Title: Locus:1.1.1.1459.16

Data file 2012-01-27 - TFD - Epitel - IEC - 10ul - 1.mgf

Click mouse within plot area to zoom in by factor of two about that point

Or, Plot from  to  Da

Label all possible matches  Label matches used for scoring

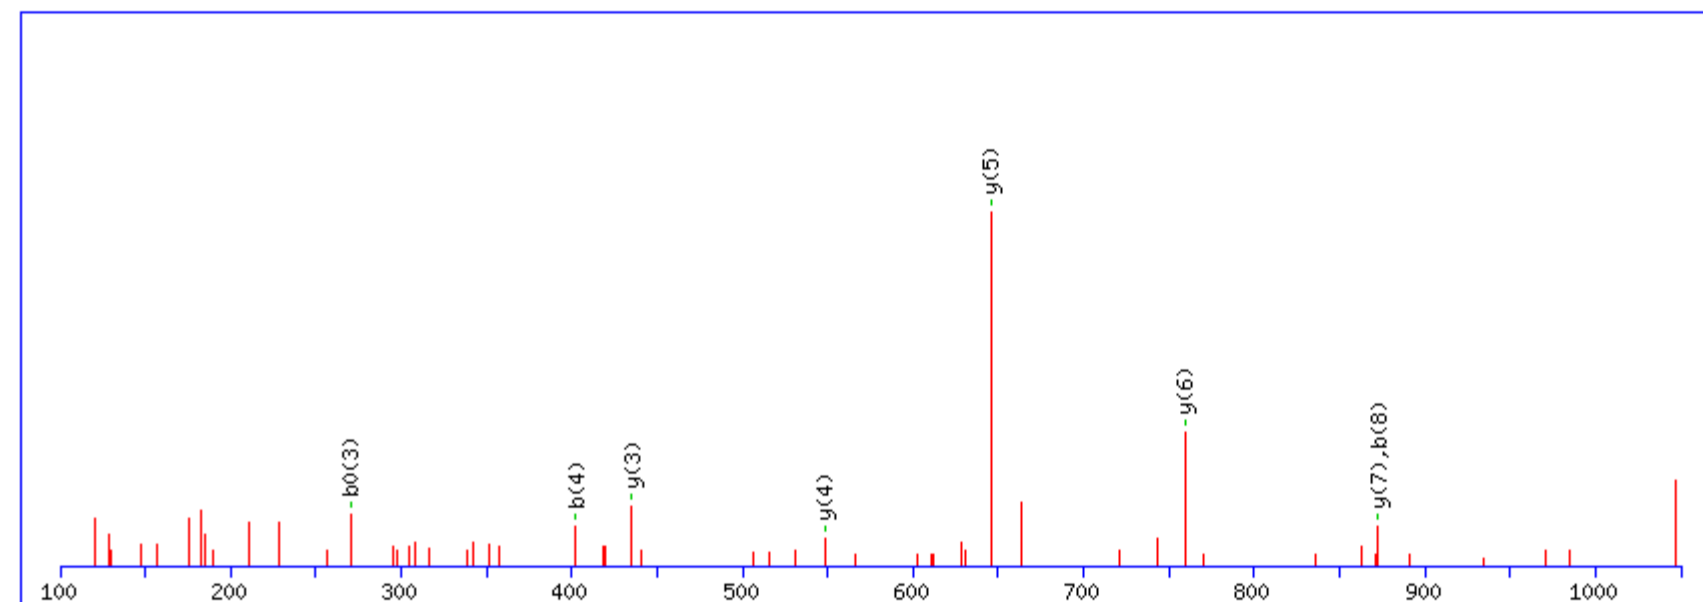

Monoisotopic mass of neutral peptide Mr(calc): 1045.592010

Fixed modifications: Carbamidomethyl (C) (apply to specified residues or termini only)

Ions Score: 40 Expect: 0.00085

Matches : 8/76 fragment ions using 9 most intense peaks [\(help\)](#)

| # | b          | b <sup>++</sup> | b <sup>*</sup> | b <sup>***</sup> | b <sup>0</sup> | b <sup>0++</sup> | Seq. | y          | y <sup>++</sup> | y <sup>*</sup> | y <sup>***</sup> | y <sup>0</sup> | y <sup>0++</sup> | # |
|---|------------|-----------------|----------------|------------------|----------------|------------------|------|------------|-----------------|----------------|------------------|----------------|------------------|---|
| 1 | 88.039304  | 44.523290       |                |                  | 70.028739      | 35.518008        | S    |            |                 |                |                  |                |                  | 9 |
| 2 | 175.071332 | 88.039304       |                |                  | 157.060767     | 79.034021        | S    | 959.567277 | 480.287277      | 942.540728     | 471.774002       | 941.556712     | 471.281994       | 8 |
| 3 | 288.155396 | 144.581336      |                |                  | 270.144831     | 135.576054       | L    | 872.535249 | 436.771263      | 855.508700     | 428.257988       |                |                  | 7 |
| 4 | 402.198323 | 201.602800      | 385.171774     | 193.089525       | 384.187758     | 192.597517       | N    | 759.451185 | 380.229231      | 742.424636     | 371.715956       |                |                  | 6 |
| 5 | 499.251087 | 250.129182      | 482.224538     | 241.615907       | 481.240522     | 241.123899       | P    | 645.408258 | 323.207767      | 628.381709     | 314.694493       |                |                  | 5 |
| 6 | 612.335151 | 306.671214      | 595.308602     | 298.157939       | 594.324586     | 297.665931       | I    | 548.355494 | 274.681385      | 531.328945     | 266.168111       |                |                  | 4 |
| 7 | 725.419215 | 363.213246      | 708.392666     | 354.699971       | 707.408650     | 354.207963       | L    | 435.271430 | 218.139353      | 418.244881     | 209.626079       |                |                  | 3 |
| 8 | 872.487629 | 436.747453      | 855.461080     | 428.234178       | 854.477064     | 427.742170       | F    | 322.187366 | 161.597321      | 305.160817     | 153.084047       |                |                  | 2 |
| 9 |            |                 |                |                  |                |                  | R    | 175.118952 | 88.063114       | 158.092403     | 79.549840        |                |                  | 1 |

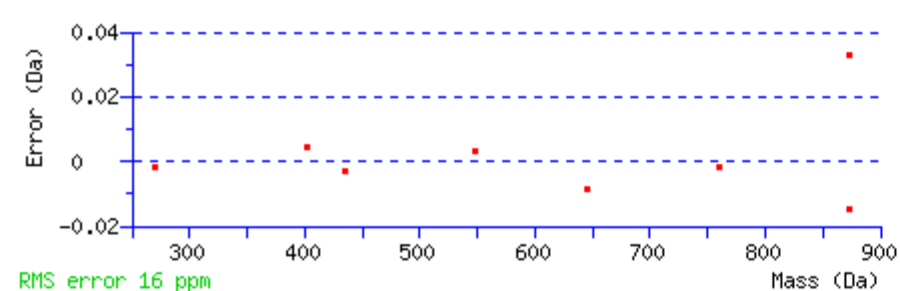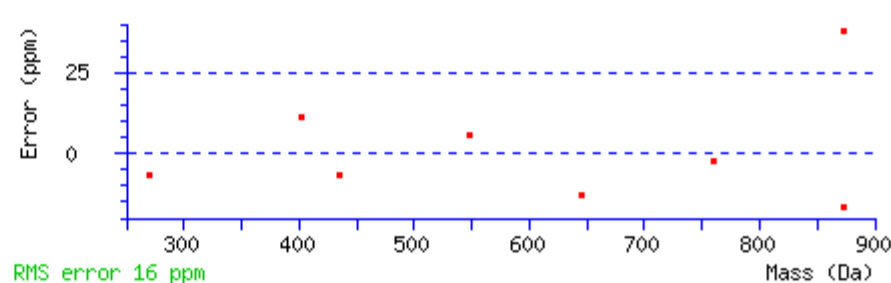

NCBI BLAST search of [SSLNPILFR](#)

(Parameters: blastp, nr protein database, expect=20000, no filter, PAM30)

Other BLAST [web gateways](#)

## All matches to this query

| Score | Mr(calc):   | Delta     | Sequence                   |
|-------|-------------|-----------|----------------------------|
| 40.4  | 1045.592010 | -0.002902 | <a href="#">SSLNPILFR</a>  |
| 11.9  | 1045.592010 | -0.002902 | <a href="#">YLAVTNPLR</a>  |
| 7.8   | 1045.592010 | -0.002902 | <a href="#">NLILSAFPR</a>  |
| 7.7   | 1045.592026 | -0.002918 | <a href="#">SSLPPPPVPR</a> |
| 6.8   | 1045.592041 | -0.002933 | <a href="#">VDVKGIFPR</a>  |
| 6.6   | 1045.587997 | 0.001111  | <a href="#">SRTSLTLPR</a>  |
| 3.4   | 1045.595367 | -0.006259 | <a href="#">IMASLNLLR</a>  |
| 2.4   | 1045.595383 | -0.006275 | <a href="#">SLAGVSLMLR</a> |
| 1.3   | 1045.591995 | -0.002887 | <a href="#">EKIYQPLR</a>   |
| 1.0   | 1045.592026 | -0.002918 | <a href="#">NEVVGLIFR</a>  |



# MASCOT Search Results

## Peptide View

MS/MS Fragmentation of **KTPGPVLPK**

Found in **RED1\_HUMAN**, Double-stranded RNA-specific editase 1 OS=Homo sapiens GN=ADARB1 PE=1 SV=1

Match to Query 13553: 967.576568 from(484.795560,2+) rtinseconds(2931) index(40172)

Title: Locus:1.1.1.2457.3

Data file 2011-11-10 - TFD - EP 3-4.mgf

Click mouse within plot area to zoom in by factor of two about that point

Or, Plot from  to  Da

Label all possible matches  Label matches used for scoring

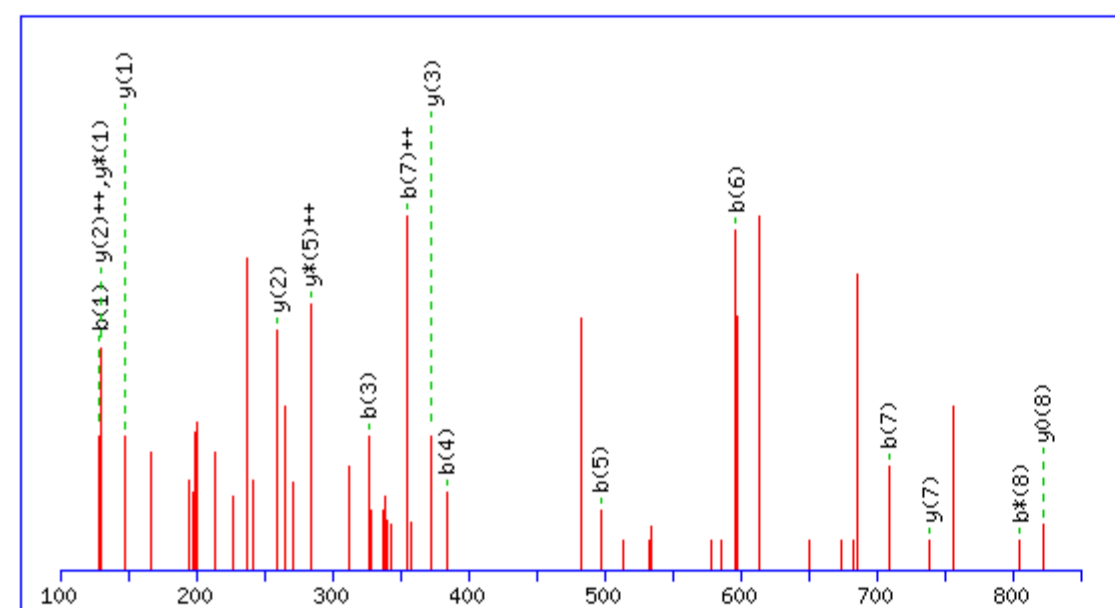

Monoisotopic mass of neutral peptide Mr(calc): 967.570236

Fixed modifications: Propionamide (C) (apply to specified residues or termini only)

Variable modifications:

P5 : Oxidation (P)

P8 : Oxidation (P)

Ions Score: 40 Expect: 0.00042

Matches : 17/80 fragment ions using 32 most intense peaks [\(help\)](#)

| # | b                 | b <sup>++</sup>   | b <sup>+</sup>    | b <sup>*++</sup> | b <sup>0</sup> | b <sup>0++</sup> | Seq.     | y                 | y <sup>++</sup>   | y <sup>+</sup>    | y <sup>*++</sup>  | y <sup>0</sup>    | y <sup>0++</sup> | # |
|---|-------------------|-------------------|-------------------|------------------|----------------|------------------|----------|-------------------|-------------------|-------------------|-------------------|-------------------|------------------|---|
| 1 | <b>129.102239</b> | 65.054757         | 112.075690        | 56.541483        |                |                  | <b>K</b> |                   |                   |                   |                   |                   |                  | 9 |
| 2 | 230.149918        | 115.578597        | 213.123369        | 107.065323       | 212.139353     | 106.573315       | <b>T</b> | 840.482547        | 420.744912        | 823.455998        | 412.231637        | <b>822.471982</b> | 411.739629       | 8 |
| 3 | <b>327.202682</b> | 164.104979        | 310.176133        | 155.591705       | 309.192117     | 155.099697       | <b>P</b> | <b>739.434868</b> | 370.221072        | 722.408319        | 361.707798        |                   |                  | 7 |
| 4 | <b>384.224146</b> | 192.615711        | 367.197597        | 184.102437       | 366.213581     | 183.610429       | <b>G</b> | 642.382104        | 321.694690        | 625.355555        | 313.181416        |                   |                  | 6 |
| 5 | <b>497.271825</b> | 249.139550        | 480.245276        | 240.626276       | 479.261260     | 240.134268       | <b>P</b> | 585.360640        | 293.183958        | 568.334091        | <b>284.670684</b> |                   |                  | 5 |
| 6 | <b>596.340239</b> | 298.673758        | 579.313690        | 290.160483       | 578.329674     | 289.668475       | <b>V</b> | 472.312961        | 236.660118        | 455.286412        | 228.146844        |                   |                  | 4 |
| 7 | <b>709.424303</b> | <b>355.215790</b> | 692.397754        | 346.702515       | 691.413738     | 346.210507       | <b>L</b> | <b>373.244547</b> | 187.125912        | 356.217998        | 178.612637        |                   |                  | 3 |
| 8 | <b>822.471982</b> | 411.739629        | <b>805.445433</b> | 403.226355       | 804.461417     | 402.734347       | <b>P</b> | <b>260.160483</b> | <b>130.583879</b> | 243.133934        | 122.070605        |                   |                  | 2 |
| 9 |                   |                   |                   |                  |                |                  | <b>K</b> | <b>147.112804</b> | 74.060040         | <b>130.086255</b> | 65.546765         |                   |                  | 1 |

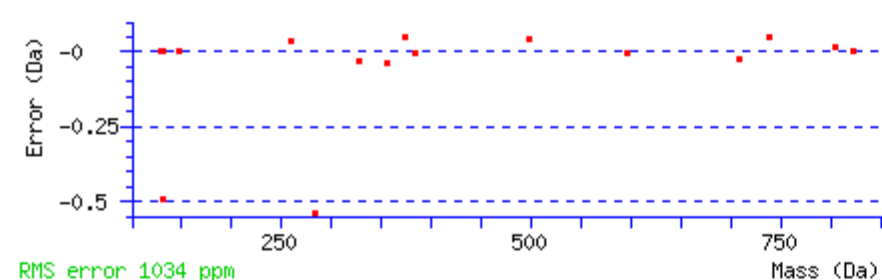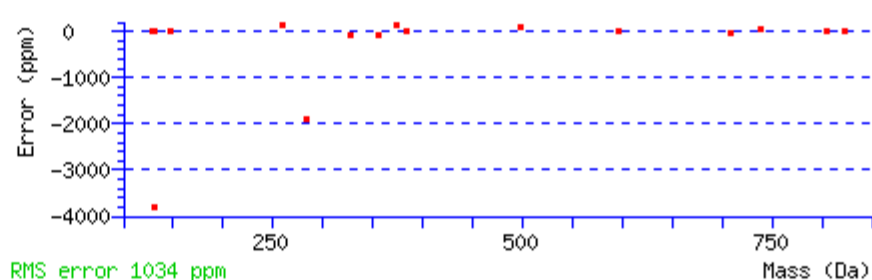

NCBI BLAST search of **KTPGPVLPK**

(Parameters: blastp, nr protein database, expect=20000, no filter, PAM30)

Other BLAST [web gateways](#)

## All matches to this query

| Score | Mr(calc):  | Delta    | Sequence                  |
|-------|------------|----------|---------------------------|
| 40.2  | 967.570236 | 0.006332 | <a href="#">KTPGPVLPK</a> |
| 26.1  | 967.570221 | 0.006347 | <a href="#">AVLNPTPIK</a> |
| 24.3  | 967.570221 | 0.006347 | <a href="#">KPPGSLLPK</a> |
| 22.8  | 967.570221 | 0.006347 | <a href="#">KLKPPPPK</a>  |
| 22.1  | 967.570236 | 0.006332 | <a href="#">KTPGPVLPK</a> |
| 21.1  | 967.570221 | 0.006347 | <a href="#">KPPGSLLPK</a> |
| 19.4  | 967.570221 | 0.006347 | <a href="#">VSPKLAPPK</a> |
| 15.4  | 967.570221 | 0.006347 | <a href="#">APGKLPLPK</a> |
| 15.0  | 967.570221 | 0.006347 | <a href="#">AKTVPVPEK</a> |
| 14.4  | 967.570221 | 0.006347 | <a href="#">KIPPPKPK</a>  |

# MASCOT Search Results

## Peptide View

MS/MS Fragmentation of **TEIPFEFPLHLK**

Found in **DSCR3\_HUMAN**, Down syndrome critical region protein 3 OS=Homo sapiens GN=DSCR3 PE=1 SV=1

Match to Query 43565: 1469.789982 from(490.937270,3+) rtinseconds(3548) index(50312)

Title: Locus:1.1.1.2640.11

Data file 2011-11-12 - TFD - EP 6-5.mgf

Click mouse within plot area to zoom in by factor of two about that point

Or, Plot from  to  Da

Label all possible matches  Label matches used for scoring

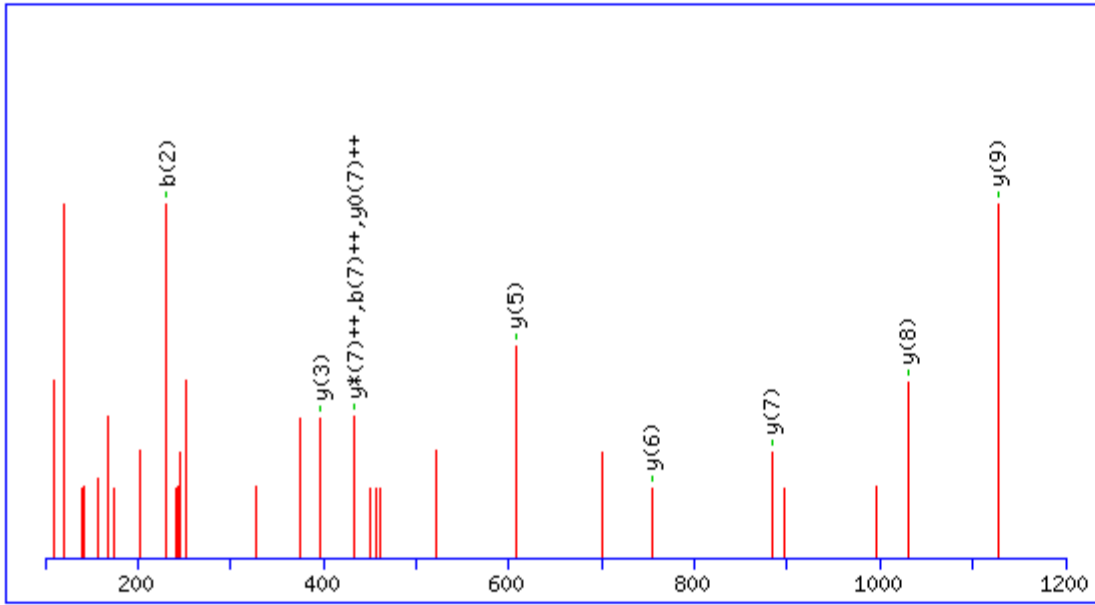

Monoisotopic mass of neutral peptide Mr(calc): 1469.791840

Fixed modifications: Propionamide (C) (apply to specified residues or termini only)

Ions Score: 41 Expect: 0.00023

Matches : 10/98 fragment ions using 11 most intense peaks [\(help\)](#)

| #  | b                 | b <sup>++</sup>   | b <sup>0</sup> | b <sup>0++</sup> | Seq. | y                  | y <sup>++</sup> | y <sup>*</sup> | y <sup>*++</sup>  | y <sup>0</sup> | y <sup>0++</sup>  | #  |
|----|-------------------|-------------------|----------------|------------------|------|--------------------|-----------------|----------------|-------------------|----------------|-------------------|----|
| 1  | 102.054955        | 51.531116         | 84.044390      | 42.525833        | T    |                    |                 |                |                   |                |                   | 12 |
| 2  | <b>231.097548</b> | 116.052412        | 213.086983     | 107.047130       | E    | 1369.751450        | 685.379363      | 1352.724901    | 676.866089        | 1351.740885    | 676.374080        | 11 |
| 3  | 344.181612        | 172.594444        | 326.171047     | 163.589162       | I    | 1240.708857        | 620.858066      | 1223.682308    | 612.344792        | 1222.698292    | 611.852784        | 10 |
| 4  | 441.234376        | 221.120826        | 423.223811     | 212.115544       | P    | <b>1127.624793</b> | 564.316035      | 1110.598244    | 555.802760        | 1109.614228    | 555.310752        | 9  |
| 5  | 588.302790        | 294.655033        | 570.292225     | 285.649751       | F    | <b>1030.572029</b> | 515.789652      | 1013.545480    | 507.276378        | 1012.561464    | 506.784370        | 8  |
| 6  | 717.345383        | 359.176330        | 699.334818     | 350.171047       | E    | <b>883.503615</b>  | 442.255446      | 866.477066     | <b>433.742171</b> | 865.493050     | <b>433.250163</b> | 7  |
| 7  | 864.413797        | <b>432.710537</b> | 846.403232     | 423.705254       | F    | <b>754.461022</b>  | 377.734149      | 737.434473     | 369.220874        |                |                   | 6  |
| 8  | 961.466561        | 481.236919        | 943.455996     | 472.231636       | P    | <b>607.392608</b>  | 304.199942      | 590.366059     | 295.686668        |                |                   | 5  |
| 9  | 1074.550625       | 537.778951        | 1056.540060    | 528.773668       | L    | 510.339844         | 255.673560      | 493.313295     | 247.160285        |                |                   | 4  |
| 10 | 1211.609537       | 606.308407        | 1193.598972    | 597.303124       | H    | <b>397.255780</b>  | 199.131528      | 380.229231     | 190.618253        |                |                   | 3  |
| 11 | 1324.693601       | 662.850439        | 1306.683036    | 653.845156       | L    | 260.196868         | 130.602072      | 243.170319     | 122.088797        |                |                   | 2  |
| 12 |                   |                   |                |                  | K    | 147.112804         | 74.060040       | 130.086255     | 65.546765         |                |                   | 1  |

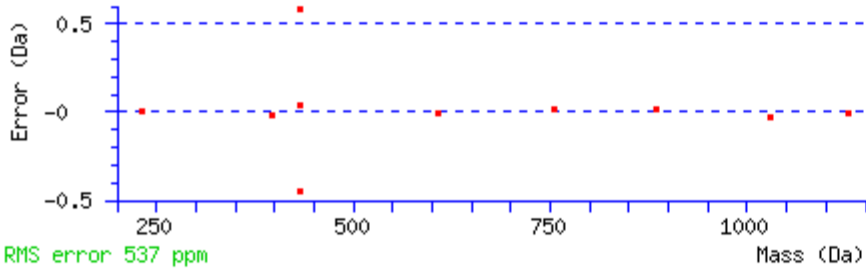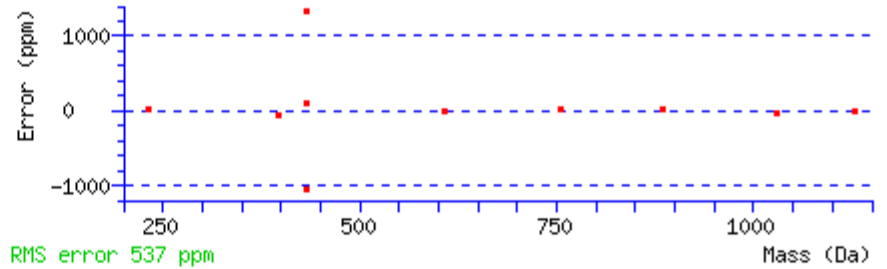

NCBI BLAST search of [TEIPFEFPLHLK](#)

(Parameters: blastp, nr protein database, expect=20000, no filter, PAM30)

Other BLAST [web gateways](#)

### All matches to this query

| Score | Mr(calc):   | Delta     | Sequence                       |
|-------|-------------|-----------|--------------------------------|
| 40.6  | 1469.791840 | -0.001858 | <a href="#">TEIPFEFPLHLK</a>   |
| 1.7   | 1469.783783 | 0.006199  | <a href="#">ASGKSPQPQLLSNK</a> |
| 1.7   | 1469.783783 | 0.006199  | <a href="#">ASGKSPQPQLLSNK</a> |
| 0.1   | 1469.783783 | 0.006199  | <a href="#">IEAQDGPGLLSRAK</a> |

Mascot: <http://www.matrixscience.com/>

# Mascot Search Results

## Peptide View

MS/MS Fragmentation of **YQEQGGEASPQR**

Found in **DBNL\_HUMAN**, Drebrin-like protein OS=Homo sapiens GN=DBNL PE=1 SV=1

Match to Query 43280: 1348.594268 from(675.304410,2+) rtinseconds(847) index(1312)

Title: Locus:1.1.1.709.17

Data file 2012-01-27 - TFD - Epitel - IEC - 10ul - 1.mgf

Click mouse within plot area to zoom in by factor of two about that point

Or, Plot from  to  Da

Label all possible matches  Label matches used for scoring

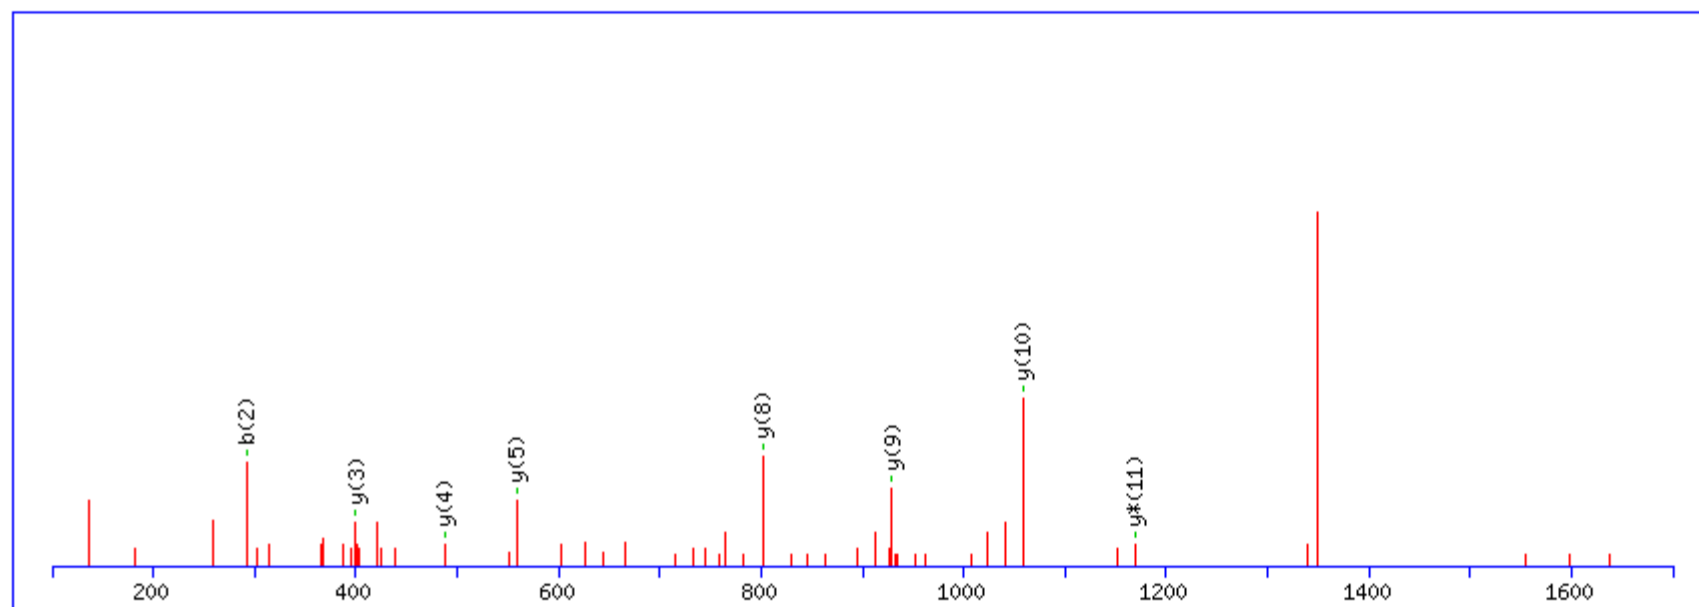

Monoisotopic mass of neutral peptide Mr(calc): 1348.600739

Fixed modifications: Carbamidomethyl (C) (apply to specified residues or termini only)

Ions Score: 42 Expect: 0.0005

Matches : 8/120 fragment ions using 12 most intense peaks [\(help\)](#)

| #  | b                 | b <sup>++</sup> | b*          | b <sup>+++</sup> | b <sup>0</sup> | b <sup>0++</sup> | Seq. | y                  | y <sup>++</sup> | y*                 | y <sup>+++</sup> | y <sup>0</sup> | y <sup>0++</sup> | #  |
|----|-------------------|-----------------|-------------|------------------|----------------|------------------|------|--------------------|-----------------|--------------------|------------------|----------------|------------------|----|
| 1  | 164.070605        | 82.538940       |             |                  |                |                  | Y    |                    |                 |                    |                  |                |                  | 12 |
| 2  | <b>292.129183</b> | 146.568230      | 275.102634  | 138.054955       |                |                  | Q    | 1186.544706        | 593.775991      | <b>1169.518157</b> | 585.262717       | 1168.534141    | 584.770708       | 11 |
| 3  | 421.171776        | 211.089526      | 404.145227  | 202.576252       | 403.161211     | 202.084244       | E    | <b>1058.486128</b> | 529.746702      | 1041.459579        | 521.233428       | 1040.475563    | 520.741420       | 10 |
| 4  | 549.230354        | 275.118815      | 532.203805  | 266.605541       | 531.219789     | 266.113533       | Q    | <b>929.443535</b>  | 465.225405      | 912.416986         | 456.712131       | 911.432970     | 456.220123       | 9  |
| 5  | 606.251818        | 303.629547      | 589.225269  | 295.116273       | 588.241253     | 294.624265       | G    | <b>801.384957</b>  | 401.196117      | 784.358408         | 392.682842       | 783.374392     | 392.190834       | 8  |
| 6  | 663.273282        | 332.140279      | 646.246733  | 323.627005       | 645.262717     | 323.134997       | G    | 744.363493         | 372.685385      | 727.336944         | 364.172110       | 726.352928     | 363.680102       | 7  |
| 7  | 792.315875        | 396.661576      | 775.289326  | 388.148301       | 774.305310     | 387.656293       | E    | 687.342029         | 344.174652      | 670.315480         | 335.661378       | 669.331464     | 335.169370       | 6  |
| 8  | 863.352989        | 432.180133      | 846.326440  | 423.666858       | 845.342424     | 423.174850       | A    | <b>558.299436</b>  | 279.653356      | 541.272887         | 271.140081       | 540.288871     | 270.648073       | 5  |
| 9  | 950.385017        | 475.696147      | 933.358468  | 467.182872       | 932.374452     | 466.690864       | S    | <b>487.262322</b>  | 244.134799      | 470.235773         | 235.621524       | 469.251757     | 235.129516       | 4  |
| 10 | 1047.437781       | 524.222529      | 1030.411232 | 515.709254       | 1029.427216    | 515.217246       | P    | <b>400.230294</b>  | 200.618785      | 383.203745         | 192.105510       |                |                  | 3  |
| 11 | 1175.496359       | 588.251818      | 1158.469810 | 579.738543       | 1157.485794    | 579.246535       | Q    | 303.177530         | 152.092403      | 286.150981         | 143.579128       |                |                  | 2  |
| 12 |                   |                 |             |                  |                |                  | R    | 175.118952         | 88.063114       | 158.092403         | 79.549839        |                |                  | 1  |

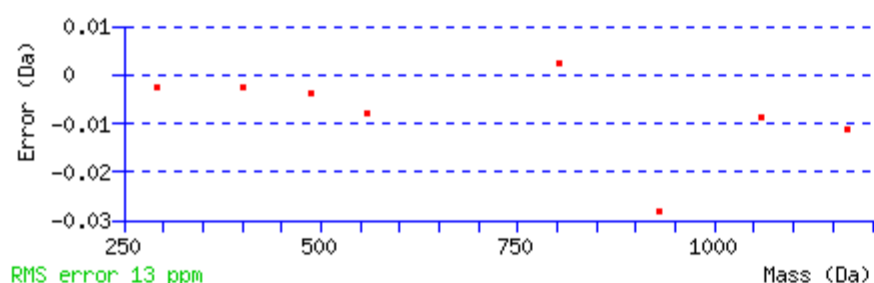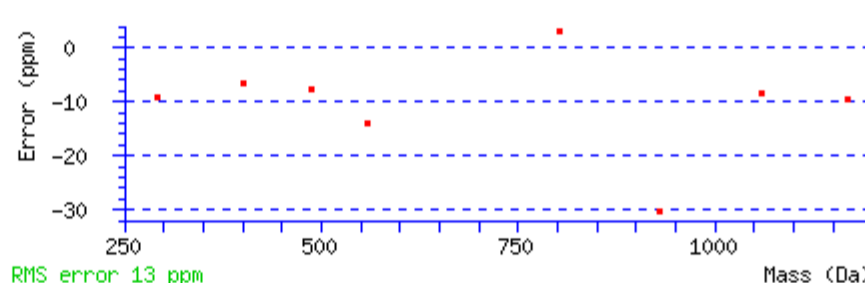

NCBI BLAST search of **YQEQGGEASPQR**

(Parameters: blastp, nr protein database, expect=20000, no filter, PAM30)

Other BLAST [web gateways](#)

All matches to this query

| Score | Mr(calc):   | Delta     | Sequence                     |
|-------|-------------|-----------|------------------------------|
| 42.4  | 1348.600739 | -0.006471 | <a href="#">YQEQGGEASPQR</a> |

Mascot: <http://www.matrixscience.com/>

**Peptide View**

MS/MS Fragmentation of **ASVTVGGEQISAIGR**

Found in **DTD1\_HUMAN**, D-tyrosyl-tRNA(Tyr) deacylase 1 OS=Homo sapiens GN=DTD1 PE=1 SV=2

Match to Query 38494: 1443.763728 from(722.889140,2+) rtinseconds(2332) index(24081)

Title: Locus:1.1.1.2509.45

Data file 2011-11-10 - TFD - EP 3-5.mgf

Click mouse within plot area to zoom in by factor of two about that point

Or, Plot from  to  Da

Label all possible matches  Label matches used for scoring

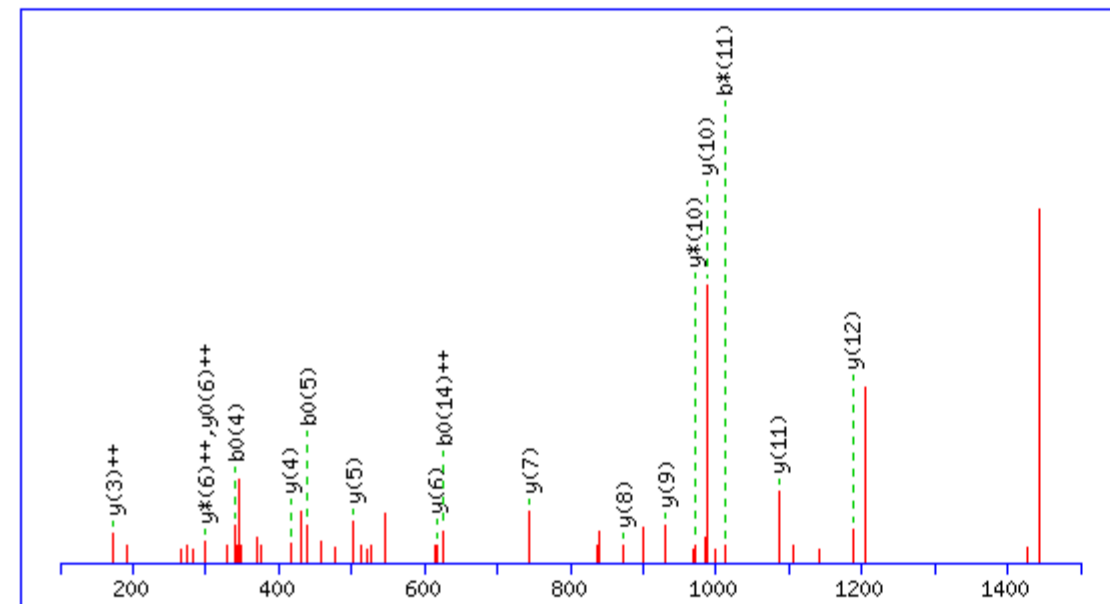

Monoisotopic mass of neutral peptide Mr(calc): 1443.768158

Fixed modifications: Propionamide (C) (apply to specified residues or termini only)

Ions Score: 38 Expect: 0.00042

Matches : 17/142 fragment ions using 37 most intense peaks [\(help\)](#)

| #  | b           | b <sup>++</sup> | b <sup>*</sup> | b <sup>*++</sup> | b <sup>0</sup> | b <sup>0++</sup> | Seq. | y           | y <sup>++</sup> | y <sup>*</sup> | y <sup>*++</sup> | y <sup>0</sup> | y <sup>0++</sup> | #  |
|----|-------------|-----------------|----------------|------------------|----------------|------------------|------|-------------|-----------------|----------------|------------------|----------------|------------------|----|
| 1  | 72.044390   | 36.525833       |                |                  |                |                  | A    |             |                 |                |                  |                |                  | 15 |
| 2  | 159.076418  | 80.041847       |                |                  | 141.065853     | 71.036564        | S    | 1373.738320 | 687.372798      | 1356.711771    | 678.859524       | 1355.727755    | 678.367515       | 14 |
| 3  | 258.144832  | 129.576054      |                |                  | 240.134267     | 120.570772       | V    | 1286.706292 | 643.856784      | 1269.679743    | 635.343509       | 1268.695727    | 634.851501       | 13 |
| 4  | 359.192511  | 180.099894      |                |                  | 341.181946     | 171.094611       | T    | 1187.637878 | 594.322577      | 1170.611329    | 585.809302       | 1169.627313    | 585.317294       | 12 |
| 5  | 458.260925  | 229.634101      |                |                  | 440.250360     | 220.628818       | V    | 1086.590199 | 543.798738      | 1069.563650    | 535.285463       | 1068.579634    | 534.793455       | 11 |
| 6  | 515.282389  | 258.144833      |                |                  | 497.271824     | 249.139550       | G    | 987.521785  | 494.264530      | 970.495236     | 485.751256       | 969.511220     | 485.259248       | 10 |
| 7  | 572.303853  | 286.655565      |                |                  | 554.293288     | 277.650282       | G    | 930.500321  | 465.753798      | 913.473772     | 457.240524       | 912.489756     | 456.748516       | 9  |
| 8  | 701.346446  | 351.176861      |                |                  | 683.335881     | 342.171579       | E    | 873.478857  | 437.243066      | 856.452308     | 428.729792       | 855.468292     | 428.237784       | 8  |
| 9  | 829.405024  | 415.206150      | 812.378475     | 406.692876       | 811.394459     | 406.200868       | Q    | 744.436264  | 372.721770      | 727.409715     | 364.208495       | 726.425699     | 363.716487       | 7  |
| 10 | 942.489088  | 471.748182      | 925.462539     | 463.234908       | 924.478523     | 462.742900       | I    | 616.377686  | 308.692481      | 599.351137     | 300.179206       | 598.367121     | 299.687198       | 6  |
| 11 | 1029.521116 | 515.264196      | 1012.494567    | 506.750922       | 1011.510551    | 506.258914       | S    | 503.293622  | 252.150449      | 486.267073     | 243.637174       | 485.283057     | 243.145166       | 5  |
| 12 | 1100.558230 | 550.782753      | 1083.531681    | 542.269479       | 1082.547665    | 541.777471       | A    | 416.261594  | 208.634435      | 399.235045     | 200.121160       |                |                  | 4  |
| 13 | 1213.642294 | 607.324785      | 1196.615745    | 598.811511       | 1195.631729    | 598.319503       | I    | 345.224480  | 173.115878      | 328.197931     | 164.602603       |                |                  | 3  |
| 14 | 1270.663758 | 635.835517      | 1253.637209    | 627.322243       | 1252.653193    | 626.830234       | G    | 232.140416  | 116.573846      | 215.113867     | 108.060571       |                |                  | 2  |
| 15 |             |                 |                |                  |                |                  | R    | 175.118952  | 88.063114       | 158.092403     | 79.549839        |                |                  | 1  |

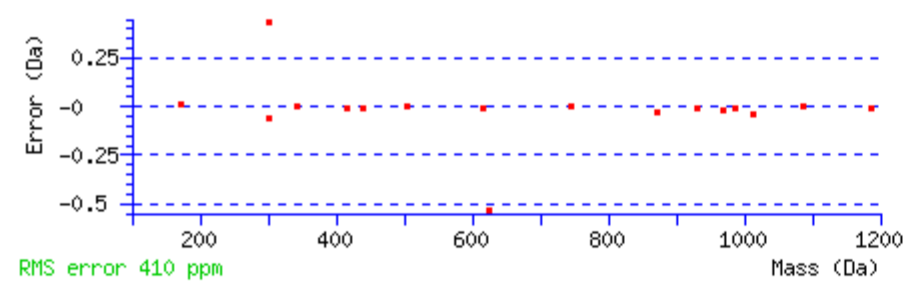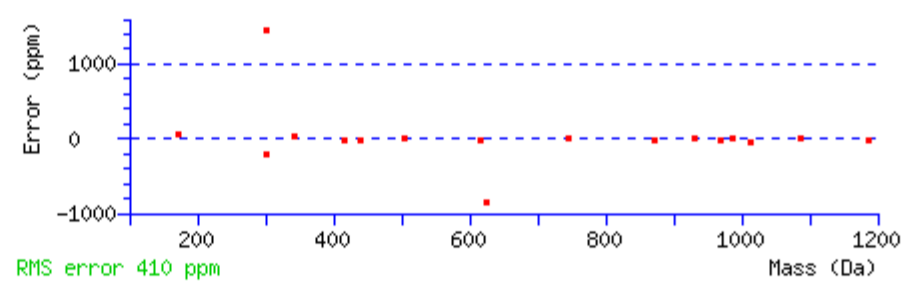

NCBI BLAST search of [ASVTVGGEQISAIGR](#)

(Parameters: blastp, nr protein database, expect=20000, no filter, PAM30)

Other BLAST [web gateways](#)

**All matches to this query**

| Score | Mr(calc):   | Delta     | Sequence                        |
|-------|-------------|-----------|---------------------------------|
| 38.3  | 1443.768158 | -0.004430 | <a href="#">ASVTVGGEQISAIGR</a> |
| 2.2   | 1443.760956 | 0.002772  | <a href="#">FPTALVLDPTPNK</a>   |

# **MATRIX** SCIENCE Mascot Search Results

## Peptide View

MS/MS Fragmentation of **YPIPPDAK**

Found in **MP2K1\_HUMAN**, Dual specificity mitogen-activated protein kinase kinase 1 OS=Homo sapiens GN=MAP2K1 PE=1 SV=2

Match to Query 16508: 996.528108 from(499.271330,2+) rtinseconds(1634) index(15779)

Title: Locus:1.1.1.2009.24

Data file 2011-11-14 - TFD - EP 8-4.mgf

Click mouse within plot area to zoom in by factor of two about that point

Or, Plot from  to  Da

Label all possible matches  Label matches used for scoring

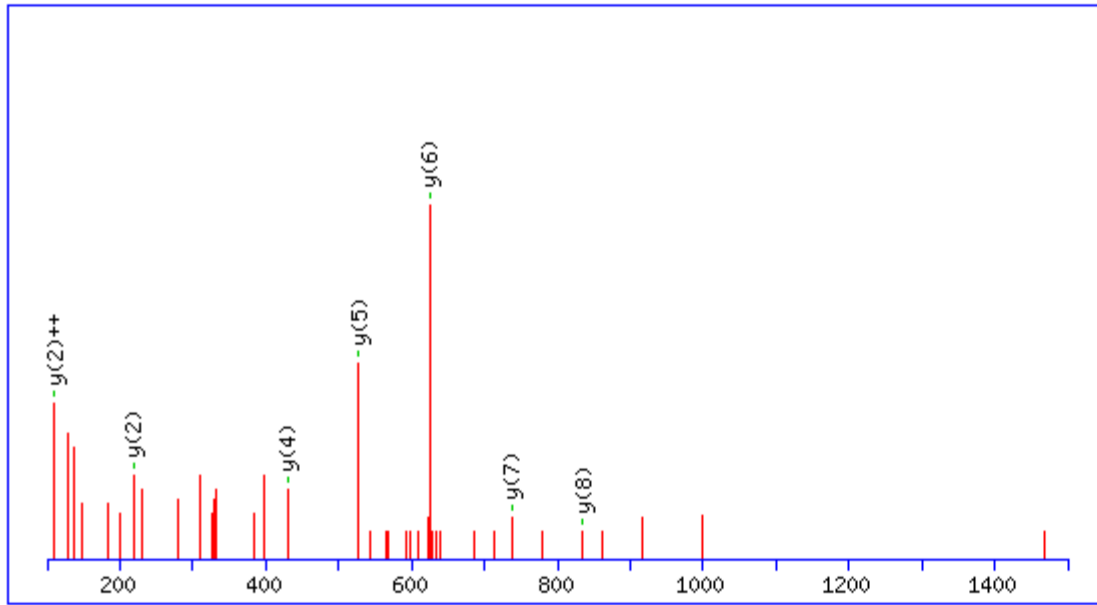

Monoisotopic mass of neutral peptide Mr(calc): 996.528015

Fixed modifications: Propionamide (C) (apply to specified residues or termini only)

Ions Score: 50 Expect: 6.6e-005

Matches : 7/64 fragment ions using 9 most intense peaks ([help](#))

| # | b          | b <sup>++</sup> | b <sup>0</sup> | b <sup>0++</sup> | Seq. | y          | y <sup>++</sup> | y <sup>*</sup> | y <sup>*++</sup> | y <sup>0</sup> | y <sup>0++</sup> | # |
|---|------------|-----------------|----------------|------------------|------|------------|-----------------|----------------|------------------|----------------|------------------|---|
| 1 | 164.070605 | 82.538940       |                |                  | Y    |            |                 |                |                  |                |                  | 9 |
| 2 | 261.123369 | 131.065322      |                |                  | P    | 834.471981 | 417.739629      | 817.445432     | 409.226354       | 816.461416     | 408.734346       | 8 |
| 3 | 374.207433 | 187.607354      |                |                  | I    | 737.419217 | 369.213247      | 720.392668     | 360.699972       | 719.408652     | 360.207964       | 7 |
| 4 | 471.260197 | 236.133737      |                |                  | P    | 624.335153 | 312.671215      | 607.308604     | 304.157940       | 606.324588     | 303.665932       | 6 |
| 5 | 568.312961 | 284.660119      |                |                  | P    | 527.282389 | 264.144833      | 510.255840     | 255.631558       | 509.271824     | 255.139550       | 5 |
| 6 | 665.365725 | 333.186501      |                |                  | P    | 430.229625 | 215.618450      | 413.203076     | 207.105176       | 412.219060     | 206.613168       | 4 |
| 7 | 780.392668 | 390.699972      | 762.382103     | 381.694690       | D    | 333.176861 | 167.092068      | 316.150312     | 158.578794       | 315.166296     | 158.086786       | 3 |
| 8 | 851.429782 | 426.218529      | 833.419217     | 417.213247       | A    | 218.149918 | 109.578597      | 201.123369     | 101.065322       |                |                  | 2 |
| 9 |            |                 |                |                  | K    | 147.112804 | 74.060040       | 130.086255     | 65.546765        |                |                  | 1 |

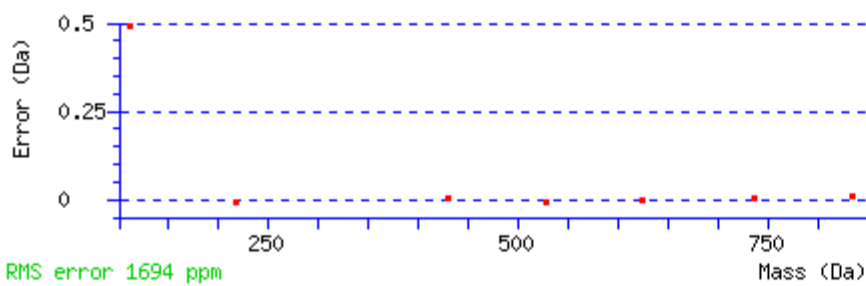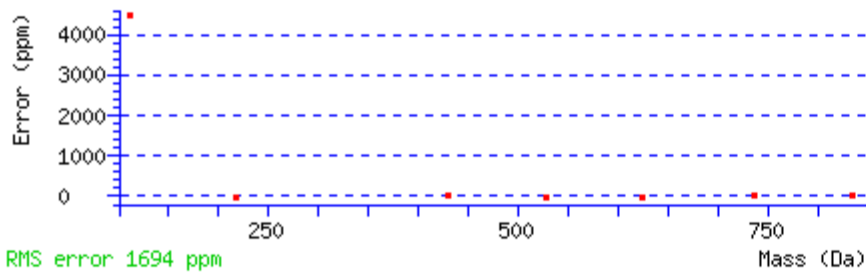

NCBI BLAST search of **YPIPPDAK**

(Parameters: blastp, nr protein database, expect=20000, no filter, PAM30)

Other BLAST [web gateways](#)

## All matches to this query

| Score | Mr(calc):  | Delta     | Sequence                   |
|-------|------------|-----------|----------------------------|
| 49.5  | 996.528015 | 0.000093  | <a href="#">YPIPPDAK</a>   |
| 4.7   | 996.531372 | -0.003264 | <a href="#">KMIEGLYK</a>   |
| 3.4   | 996.524033 | 0.004075  | <a href="#">QGSVVPGPPK</a> |
| 1.1   | 996.535233 | -0.007125 | <a href="#">HPVSTKANK</a>  |

# **MASCOT** Mascot Search Results

## Peptide View

MS/MS Fragmentation of **SEYIETASGNK**

Found in **DCTN5\_HUMAN**, Dynactin subunit 5 OS=Homo sapiens GN=DCTN5 PE=1 SV=1

Match to Query 29422: 1197.555968 from(599.785260,2+) rtinseconds(1236) index(5272)

Title: Locus:1.1.1.1737.42

Data file 2011-11-10 - TFD - EP 3-6.mgf

Click mouse within plot area to zoom in by factor of two about that point

Or, Plot from  to  Da

Label all possible matches  Label matches used for scoring

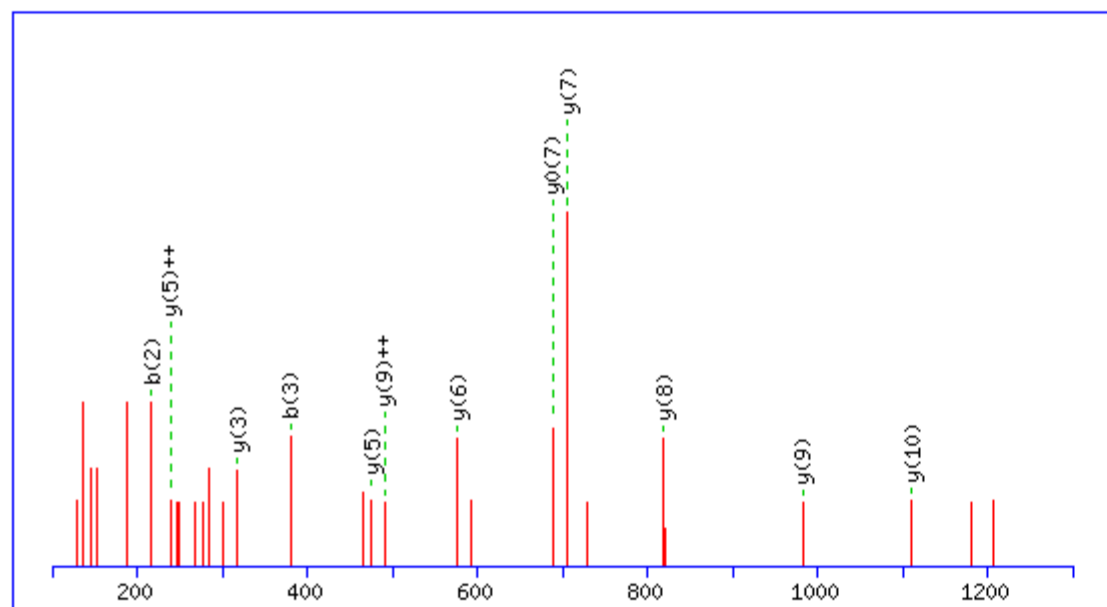

Monoisotopic mass of neutral peptide Mr(calc): 1197.551315

Fixed modifications: Propionamide (C) (apply to specified residues or termini only)

Ions Score: 52 Expect: 1.6e-005

Matches : 12/96 fragment ions using 20 most intense peaks [\(help\)](#)

| #  | b                 | b <sup>++</sup> | b <sup>*</sup> | b <sup>+++</sup> | b <sup>0</sup> | b <sup>0++</sup> | Seq. | y                  | y <sup>++</sup>   | y <sup>*</sup> | y <sup>+++</sup> | y <sup>0</sup>    | y <sup>0++</sup> | #  |
|----|-------------------|-----------------|----------------|------------------|----------------|------------------|------|--------------------|-------------------|----------------|------------------|-------------------|------------------|----|
| 1  | 88.039304         | 44.523290       |                |                  | 70.028739      | 35.518008        | S    |                    |                   |                |                  |                   |                  | 11 |
| 2  | <b>217.081897</b> | 109.044586      |                |                  | 199.071332     | 100.039304       | E    | <b>1111.526595</b> | 556.266936        | 1094.500046    | 547.753661       | 1093.516030       | 547.261653       | 10 |
| 3  | <b>380.145226</b> | 190.576251      |                |                  | 362.134661     | 181.570969       | Y    | <b>982.484002</b>  | <b>491.745639</b> | 965.457453     | 483.232365       | 964.473437        | 482.740357       | 9  |
| 4  | 493.229290        | 247.118283      |                |                  | 475.218725     | 238.113001       | I    | <b>819.420673</b>  | 410.213975        | 802.394124     | 401.700700       | 801.410108        | 401.208692       | 8  |
| 5  | 622.271883        | 311.639580      |                |                  | 604.261318     | 302.634297       | E    | <b>706.336609</b>  | 353.671943        | 689.310060     | 345.158668       | <b>688.326044</b> | 344.666660       | 7  |
| 6  | 723.319562        | 362.163419      |                |                  | 705.308997     | 353.158137       | T    | <b>577.294016</b>  | 289.150646        | 560.267467     | 280.637372       | 559.283451        | 280.145364       | 6  |
| 7  | 794.356676        | 397.681976      |                |                  | 776.346111     | 388.676694       | A    | <b>476.246337</b>  | <b>238.626806</b> | 459.219788     | 230.113532       | 458.235772        | 229.621524       | 5  |
| 8  | 881.388704        | 441.197990      |                |                  | 863.378139     | 432.192708       | S    | 405.209223         | 203.108249        | 388.182674     | 194.594975       | 387.198658        | 194.102967       | 4  |
| 9  | 938.410168        | 469.708722      |                |                  | 920.399603     | 460.703440       | G    | <b>318.177195</b>  | 159.592235        | 301.150646     | 151.078961       |                   |                  | 3  |
| 10 | 1052.453095       | 526.730186      | 1035.426546    | 518.216911       | 1034.442530    | 517.724903       | N    | 261.155731         | 131.081503        | 244.129182     | 122.568229       |                   |                  | 2  |
| 11 |                   |                 |                |                  |                |                  | K    | 147.112804         | 74.060040         | 130.086255     | 65.546765        |                   |                  | 1  |

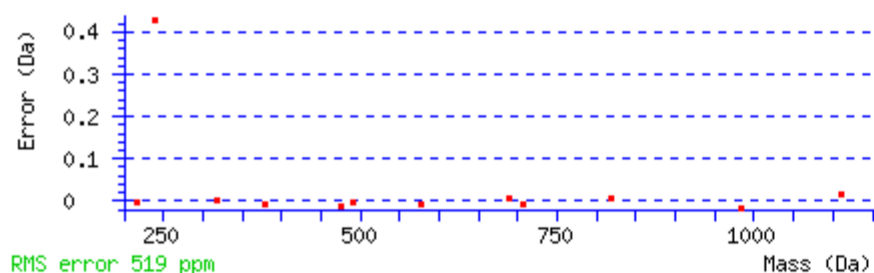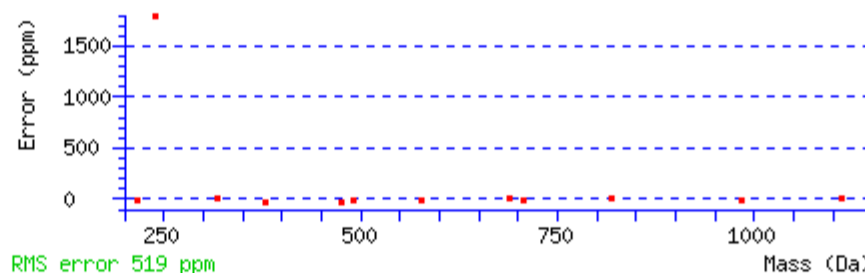

NCBI BLAST search of [SEYIETASGNK](#)

(Parameters: blastp, nr protein database, expect=20000, no filter, PAM30)

Other BLAST [web gateways](#)

All matches to this query

| Score | Mr(calc):   | Delta     | Sequence                    |
|-------|-------------|-----------|-----------------------------|
| 52.5  | 1197.551315 | 0.004653  | <a href="#">SEYIETASGNK</a> |
| 1.4   | 1197.560074 | -0.004106 | <a href="#">DTKMSFQWR</a>   |

# **MASCOT** Mascot Search Results

## Peptide View

MS/MS Fragmentation of **IQDLDRR**

Found in **DYH17\_HUMAN**, Dynein heavy chain 17, axonemal OS=Homo sapiens GN=DNAH17 PE=2 SV=2

Match to Query 6180: 914.485868 from(458.250210,2+) rtinseconds(1568) index(3733)

Title: Locus:1.1.1.2245.9

Data file 2011-11-10 - TFD - EP 3-8.mgf

Click mouse within plot area to zoom in by factor of two about that point

Or, Plot from  to  Da

Label all possible matches  Label matches used for scoring

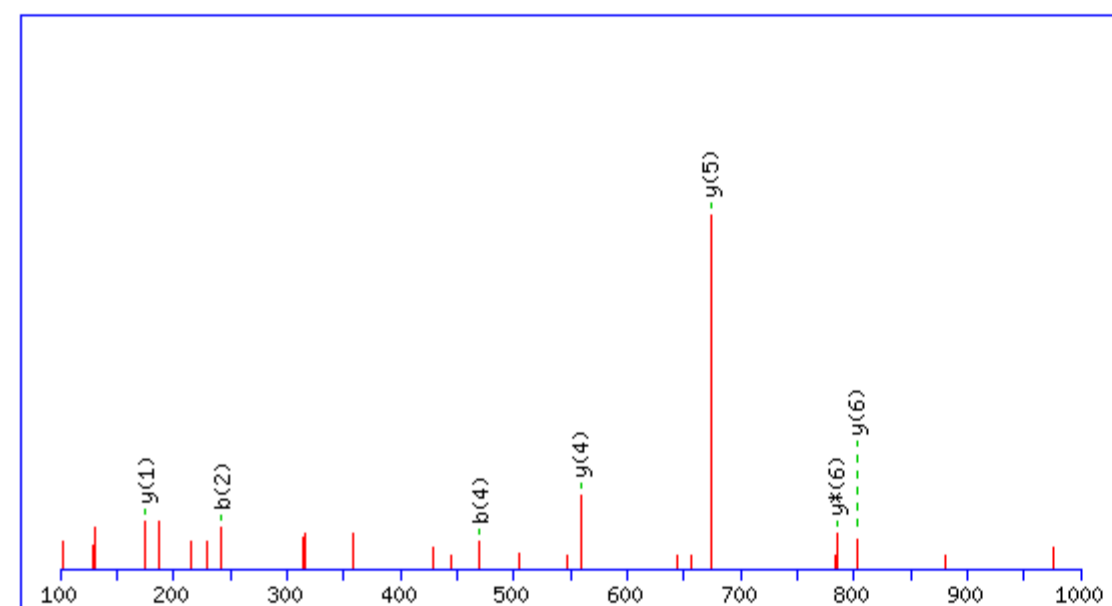

Monoisotopic mass of neutral peptide Mr(calc): 914.493362

Fixed modifications: Propionamide (C) (apply to specified residues or termini only)

Ions Score: 35 Expect: 0.0053

Matches : 7/62 fragment ions using 8 most intense peaks ([help](#))

| # | b                 | b <sup>++</sup> | b <sup>*</sup> | b <sup>*++</sup> | b <sup>0</sup> | b <sup>0++</sup> | Seq. | y                 | y <sup>++</sup> | y <sup>*</sup>    | y <sup>*++</sup> | y <sup>0</sup> | y <sup>0++</sup> | # |
|---|-------------------|-----------------|----------------|------------------|----------------|------------------|------|-------------------|-----------------|-------------------|------------------|----------------|------------------|---|
| 1 | 114.091340        | 57.549308       |                |                  |                |                  | I    |                   |                 |                   |                  |                |                  | 7 |
| 2 | <b>242.149918</b> | 121.578597      | 225.123369     | 113.065323       |                |                  | Q    | <b>802.416591</b> | 401.711934      | <b>785.390042</b> | 393.198659       | 784.406026     | 392.706651       | 6 |
| 3 | 357.176861        | 179.092069      | 340.150312     | 170.578794       | 339.166296     | 170.086786       | D    | <b>674.358013</b> | 337.682645      | 657.331464        | 329.169370       | 656.347448     | 328.677362       | 5 |
| 4 | <b>470.260925</b> | 235.634101      | 453.234376     | 227.120826       | 452.250360     | 226.628818       | L    | <b>559.331070</b> | 280.169173      | 542.304521        | 271.655898       | 541.320505     | 271.163890       | 4 |
| 5 | 585.287868        | 293.147572      | 568.261319     | 284.634298       | 567.277303     | 284.142290       | D    | 446.247006        | 223.627141      | 429.220457        | 215.113866       | 428.236441     | 214.621858       | 3 |
| 6 | 741.388979        | 371.198128      | 724.362430     | 362.684853       | 723.378414     | 362.192845       | R    | 331.220063        | 166.113669      | 314.193514        | 157.600395       |                |                  | 2 |
| 7 |                   |                 |                |                  |                |                  | R    | <b>175.118952</b> | 88.063114       | 158.092403        | 79.549839        |                |                  | 1 |

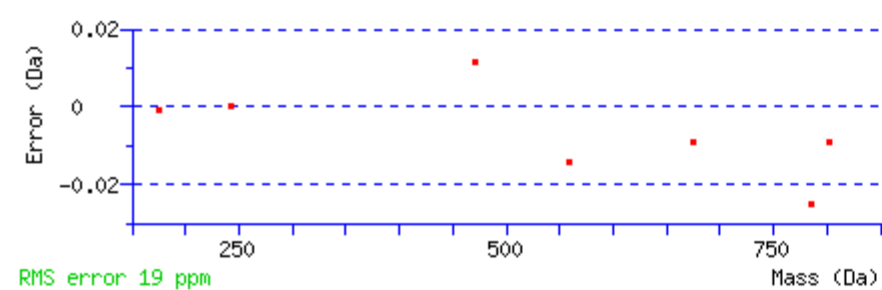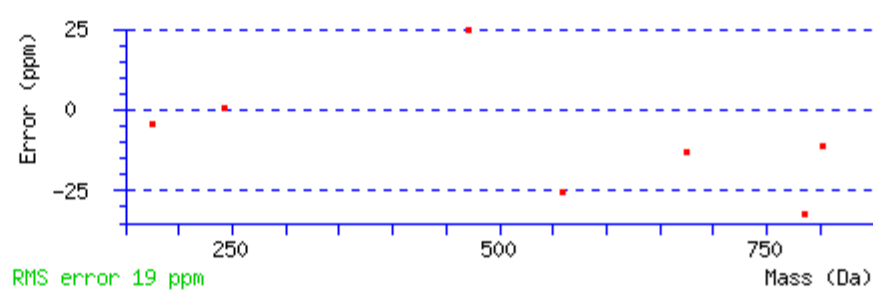

NCBI BLAST search of **IQDLDRR**

(Parameters: blastp, nr protein database, expect=20000, no filter, PAM30)

Other BLAST [web gateways](#)

All matches to this query

| Score | Mr(calc):  | Delta     | Sequence                 |
|-------|------------|-----------|--------------------------|
| 35.0  | 914.493362 | -0.007494 | <a href="#">IQDLDRR</a>  |
| 31.5  | 914.482117 | 0.003751  | <a href="#">LQDAEIAR</a> |
| 22.2  | 914.482147 | 0.003721  | <a href="#">LQIDVDGR</a> |
| 19.7  | 914.482132 | 0.003736  | <a href="#">KPDPASLR</a> |
| 16.6  | 914.493362 | -0.007494 | <a href="#">LSRSPSPR</a> |
| 15.7  | 914.482117 | 0.003751  | <a href="#">IQEELQR</a>  |
| 15.7  | 914.493378 | -0.007510 | <a href="#">IQTVGQNR</a> |
| 15.7  | 914.482117 | 0.003751  | <a href="#">LQEIQER</a>  |
| 15.7  | 914.482117 | 0.003751  | <a href="#">LQQELER</a>  |
| 15.7  | 914.482147 | 0.003721  | <a href="#">LQVTPEGR</a> |

# Mascot Search Results

## Peptide View

MS/MS Fragmentation of **DIDPQNDLTFLR**

Found in **DLRBI\_HUMAN**, Dynein light chain roadblock-type 1 OS=Homo sapiens GN=DYNLRB1 PE=1 SV=3

Match to Query 38781: 1445.714088 from(723.864320,2+) rtinseconds(3265) index(38359)

Title: Locus:1.1.1.2578.22

Data file 2011-11-12 - TFD - EP 6-7.mgf

Click mouse within plot area to zoom in by factor of two about that point

Or, Plot from  to  Da

Label all possible matches  Label matches used for scoring

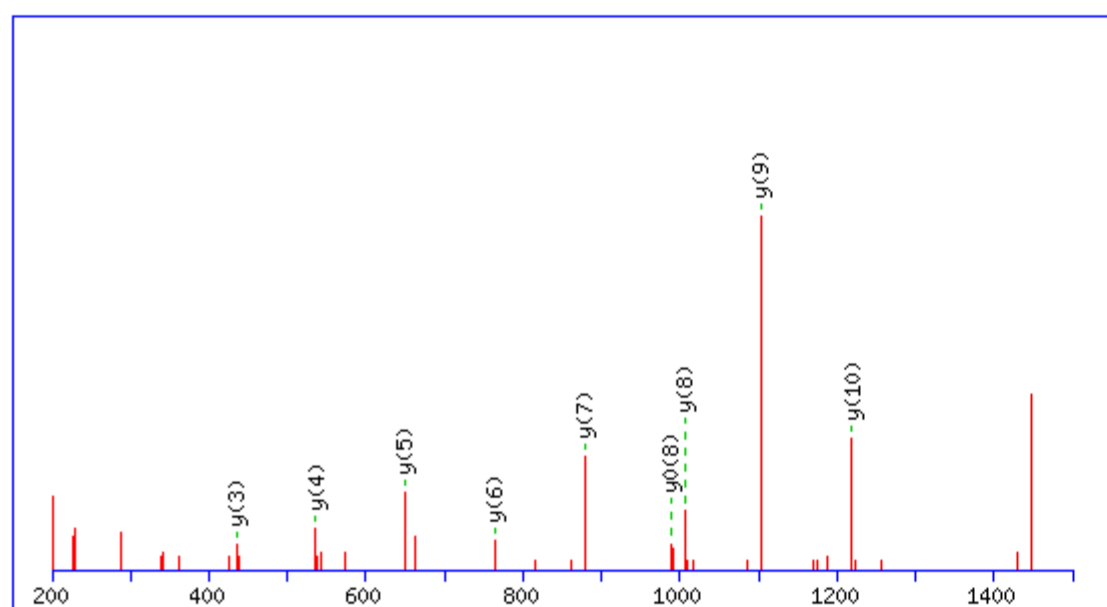

Monoisotopic mass of neutral peptide Mr(calc): 1445.715057

Fixed modifications: Propionamide (C) (apply to specified residues or termini only)

Ions Score: 74 Expect: 1.2e-007

Matches : 9/118 fragment ions using 12 most intense peaks [\(help\)](#)

| #  | b           | b <sup>++</sup> | b <sup>*</sup> | b <sup>*++</sup> | b <sup>0</sup> | b <sup>0++</sup> | Seq. | y                  | y <sup>++</sup> | y <sup>*</sup> | y <sup>*++</sup> | y <sup>0</sup>    | y <sup>0++</sup> | #  |
|----|-------------|-----------------|----------------|------------------|----------------|------------------|------|--------------------|-----------------|----------------|------------------|-------------------|------------------|----|
| 1  | 116.034219  | 58.520748       |                |                  | 98.023654      | 49.515465        | D    |                    |                 |                |                  |                   |                  | 12 |
| 2  | 229.118283  | 115.062779      |                |                  | 211.107718     | 106.057497       | I    | 1331.695392        | 666.351334      | 1314.668843    | 657.838059       | 1313.684827       | 657.346051       | 11 |
| 3  | 344.145226  | 172.576251      |                |                  | 326.134661     | 163.570968       | D    | <b>1218.611328</b> | 609.809302      | 1201.584779    | 601.296028       | 1200.600763       | 600.804019       | 10 |
| 4  | 441.197990  | 221.102633      |                |                  | 423.187425     | 212.097350       | P    | <b>1103.584385</b> | 552.295830      | 1086.557836    | 543.782556       | 1085.573820       | 543.290548       | 9  |
| 5  | 569.256568  | 285.131922      | 552.230019     | 276.618648       | 551.246003     | 276.126640       | Q    | <b>1006.531621</b> | 503.769449      | 989.505072     | 495.256174       | <b>988.521056</b> | 494.764166       | 8  |
| 6  | 683.299495  | 342.153386      | 666.272946     | 333.640111       | 665.288930     | 333.148103       | N    | <b>878.473043</b>  | 439.740160      | 861.446494     | 431.226885       | 860.462478        | 430.734877       | 7  |
| 7  | 798.326438  | 399.666857      | 781.299889     | 391.153582       | 780.315873     | 390.661574       | D    | <b>764.430116</b>  | 382.718696      | 747.403567     | 374.205422       | 746.419551        | 373.713414       | 6  |
| 8  | 911.410502  | 456.208889      | 894.383953     | 447.695614       | 893.399937     | 447.203606       | L    | <b>649.403173</b>  | 325.205225      | 632.376624     | 316.691950       | 631.392608        | 316.199942       | 5  |
| 9  | 1012.458181 | 506.732729      | 995.431632     | 498.219454       | 994.447616     | 497.727446       | T    | <b>536.319109</b>  | 268.663193      | 519.292560     | 260.149918       | 518.308544        | 259.657910       | 4  |
| 10 | 1159.526595 | 580.266936      | 1142.500046    | 571.753661       | 1141.516030    | 571.261653       | F    | <b>435.271430</b>  | 218.139353      | 418.244881     | 209.626078       |                   |                  | 3  |
| 11 | 1272.610659 | 636.808967      | 1255.584110    | 628.295693       | 1254.600094    | 627.803685       | L    | 288.203016         | 144.605146      | 271.176467     | 136.091871       |                   |                  | 2  |
| 12 |             |                 |                |                  |                |                  | R    | 175.118952         | 88.063114       | 158.092403     | 79.549839        |                   |                  | 1  |

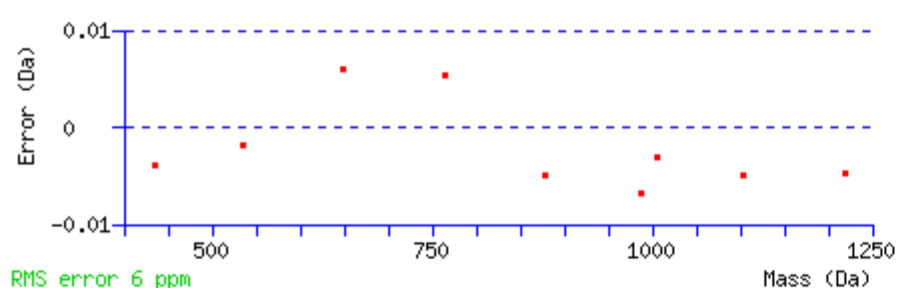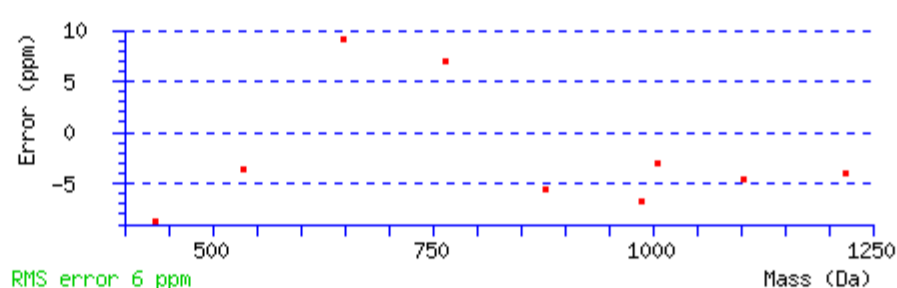

NCBI BLAST search of [DIDPQNDLTFLR](#)

(Parameters: blastp, nr protein database, expect=20000, no filter, PAM30)

Other BLAST [web gateways](#)

All matches to this query

| Score | Mr(calc):   | Delta     | Sequence                      |
|-------|-------------|-----------|-------------------------------|
| 73.7  | 1445.715057 | -0.000969 | <a href="#">DIDPQNDLTFLR</a>  |
| 0.0   | 1445.699814 | 0.014274  | <a href="#">TEIDSPTNVVTDR</a> |



**Peptide View**

MS/MS Fragmentation of **EAIESAIGGNAYQHSK**  
 Found in **DYLT1\_HUMAN**, Dynein light chain Tctex-type 1 OS=Homo sapiens GN=DYNLT1 PE=1 SV=1

Match to Query 43895: 1673.798112 from(558.939980,3+) rtinseconds(1811) index(13643)  
 Title: Locus:1.1.1.2020.35  
 Data file 2011-11-12 - TFD - EP 6-7.mgf

Click mouse within plot area to zoom in by factor of two about that point  
 Or, Plot from  to  Da   
 Label all possible matches  Label matches used for scoring

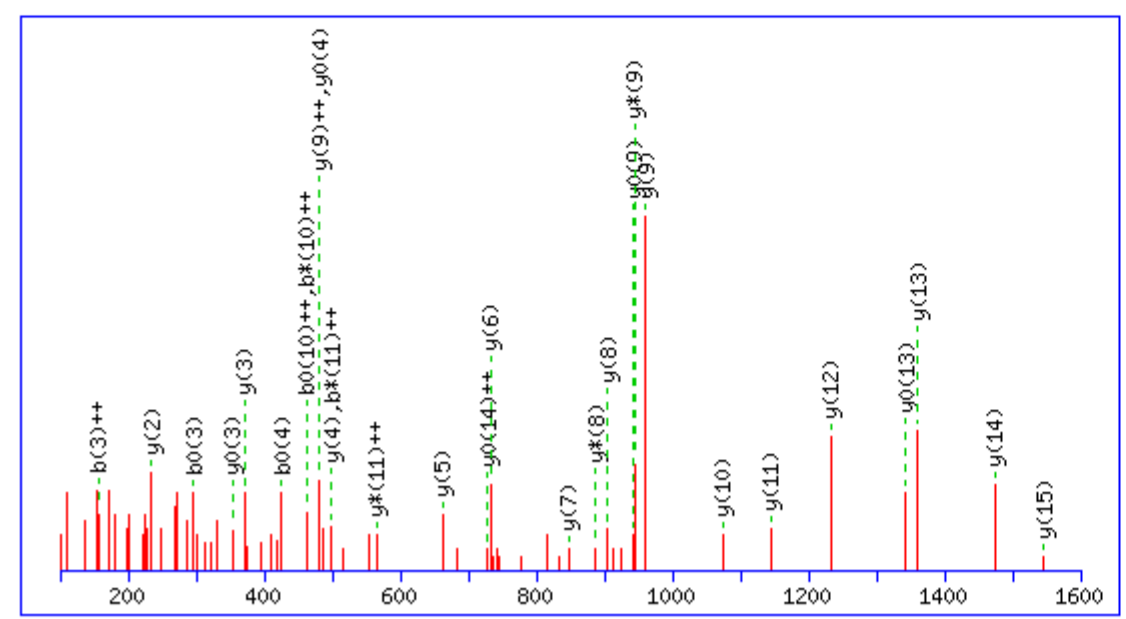

Monoisotopic mass of neutral peptide Mr(calcd): 1673.800873  
 Fixed modifications: Propionamide (C) (apply to specified residues or termini only)  
 Ions Score: 105 Expect: 2.5e-010  
 Matches : 29/160 fragment ions using 42 most intense peaks [\(help\)](#)

| #  | b           | b <sup>++</sup> | b <sup>+</sup> | b <sup>*++</sup> | b <sup>0</sup> | b <sup>0++</sup> | Seq. | y           | y <sup>++</sup> | y <sup>+</sup> | y <sup>*++</sup> | y <sup>0</sup> | y <sup>0++</sup> | #  |
|----|-------------|-----------------|----------------|------------------|----------------|------------------|------|-------------|-----------------|----------------|------------------|----------------|------------------|----|
| 1  | 130.049869  | 65.528572       |                |                  | 112.039304     | 56.523290        | E    |             |                 |                |                  |                |                  | 16 |
| 2  | 201.086983  | 101.047130      |                |                  | 183.076418     | 92.041847        | A    | 1545.765597 | 773.386436      | 1528.739048    | 764.873162       | 1527.755032    | 764.381154       | 15 |
| 3  | 314.171047  | 157.589161      |                |                  | 296.160482     | 148.583879       | I    | 1474.728483 | 737.867879      | 1457.701934    | 729.354605       | 1456.717918    | 728.862597       | 14 |
| 4  | 443.213640  | 222.110458      |                |                  | 425.203075     | 213.105176       | E    | 1361.644419 | 681.325848      | 1344.617870    | 672.812573       | 1343.633854    | 672.320565       | 13 |
| 5  | 530.245668  | 265.626472      |                |                  | 512.235103     | 256.621190       | S    | 1232.601826 | 616.804551      | 1215.575277    | 608.291276       | 1214.591261    | 607.799268       | 12 |
| 6  | 601.282782  | 301.145029      |                |                  | 583.272217     | 292.139747       | A    | 1145.569798 | 573.288537      | 1128.543249    | 564.775263       | 1127.559233    | 564.283255       | 11 |
| 7  | 714.366846  | 357.687061      |                |                  | 696.356281     | 348.681779       | I    | 1074.532684 | 537.769980      | 1057.506135    | 529.256706       | 1056.522119    | 528.764698       | 10 |
| 8  | 771.388310  | 386.197793      |                |                  | 753.377745     | 377.192511       | G    | 961.448620  | 481.227948      | 944.422071     | 472.714674       | 943.438055     | 472.222666       | 9  |
| 9  | 828.409774  | 414.708525      |                |                  | 810.399209     | 405.703243       | G    | 904.427156  | 452.717216      | 887.400607     | 444.203941       | 886.416591     | 443.711933       | 8  |
| 10 | 942.452701  | 471.729989      | 925.426152     | 463.216714       | 924.442136     | 462.724706       | N    | 847.405692  | 424.206484      | 830.379143     | 415.693209       | 829.395127     | 415.201201       | 7  |
| 11 | 1013.489815 | 507.248546      | 996.463266     | 498.735271       | 995.479250     | 498.243263       | A    | 733.362765  | 367.185021      | 716.336216     | 358.671746       | 715.352200     | 358.179738       | 6  |
| 12 | 1176.553144 | 588.780210      | 1159.526595    | 580.266936       | 1158.542579    | 579.774927       | Y    | 662.325651  | 331.666464      | 645.299102     | 323.153189       | 644.315086     | 322.661181       | 5  |
| 13 | 1304.611722 | 652.809499      | 1287.585173    | 644.296224       | 1286.601157    | 643.804216       | Q    | 499.262322  | 250.134799      | 482.235773     | 241.621524       | 481.251757     | 241.129516       | 4  |
| 14 | 1441.670634 | 721.338955      | 1424.644085    | 712.825680       | 1423.660069    | 712.333672       | H    | 371.203744  | 186.105510      | 354.177195     | 177.592236       | 353.193179     | 177.100228       | 3  |
| 15 | 1528.702662 | 764.854969      | 1511.676113    | 756.341695       | 1510.692097    | 755.849686       | S    | 234.144832  | 117.576054      | 217.118283     | 109.062780       | 216.134267     | 108.570772       | 2  |
| 16 |             |                 |                |                  |                |                  | K    | 147.112804  | 74.060040       | 130.086255     | 65.546765        |                |                  | 1  |

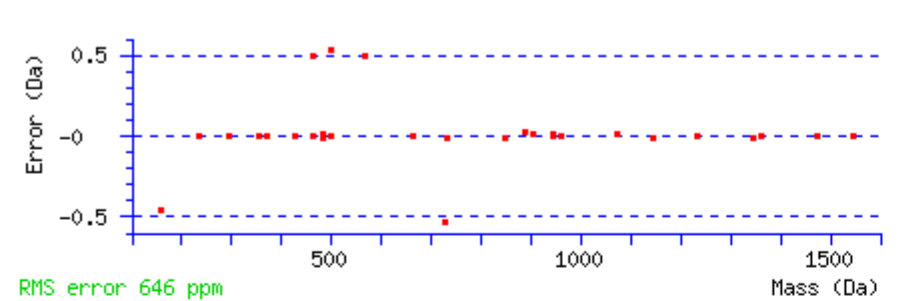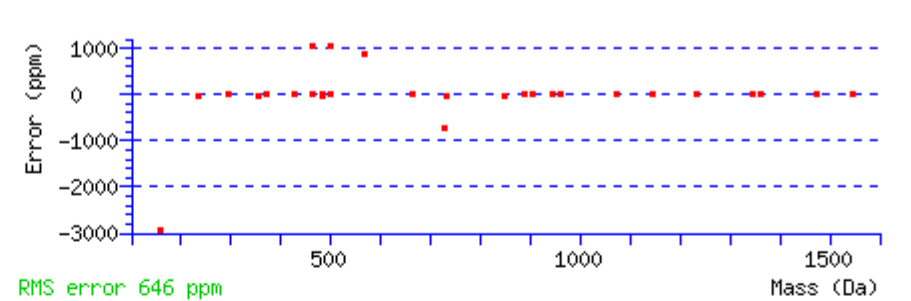

NCBI BLAST search of **EAIESAIGGNAYQHSK**  
 (Parameters: blastp, nr protein database, expect=20000, no filter, PAM30)  
 Other BLAST [web gateways](#)

**All matches to this query**

| Score | Mr(calcd):  | Delta     | Sequence                         |
|-------|-------------|-----------|----------------------------------|
| 104.7 | 1673.800873 | -0.002761 | <a href="#">EAIESAIGGNAYQHSK</a> |
| 2.2   | 1673.799561 | -0.001449 | <a href="#">VLESTPAESSEGLDPK</a> |

# MASCOT SEARCH RESULTS

## Peptide View

MS/MS Fragmentation of **AKPPSSSSTCTDSATR**

Found in **DTBPI\_HUMAN**, Dysbindin OS=Homo sapiens GN=DTNBP1 PE=1 SV=1

Match to Query 937944: 1651.750032 from(551.590620,3+) rtinseconds(734) index(324782)

Title: Locus:1.1.1.610.10

Data file C:\Program Files (x86)\Matrix Science\Mascot Daemon\mgf3 TFD - Epitel - R2\mascot\_daemon\_merge.mgf

Click mouse within plot area to zoom in by factor of two about that point

Or, Plot from  to  Da

Label all possible matches  Label matches used for scoring

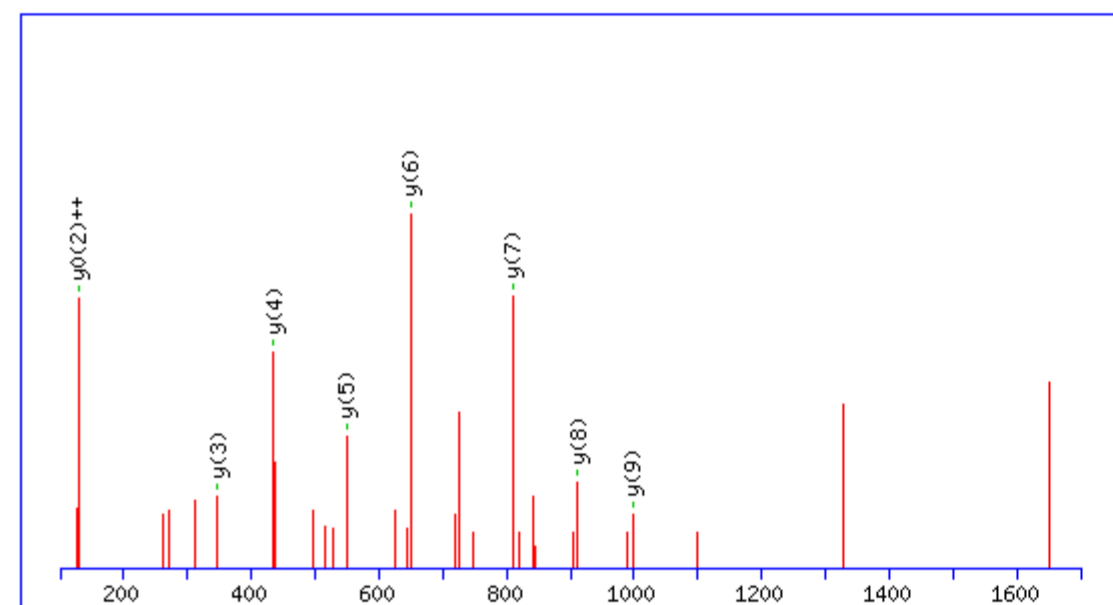

Monoisotopic mass of neutral peptide Mr(calc): 1651.747162

Fixed modifications: Carbamidomethyl (C) (apply to specified residues or termini only)

Ions Score: 54 Expect: 1.3e-005

Matches : 8/168 fragment ions using 11 most intense peaks ([help](#))

| #  | b           | b <sup>++</sup> | b <sup>*</sup> | b <sup>+++</sup> | b <sup>0</sup> | b <sup>0++</sup> | Seq. | y                 | y <sup>++</sup> | y <sup>*</sup> | y <sup>+++</sup> | y <sup>0</sup> | y <sup>0++</sup>  | #  |
|----|-------------|-----------------|----------------|------------------|----------------|------------------|------|-------------------|-----------------|----------------|------------------|----------------|-------------------|----|
| 1  | 72.044390   | 36.525833       |                |                  |                |                  | A    |                   |                 |                |                  |                |                   | 16 |
| 2  | 200.139353  | 100.573315      | 183.112804     | 92.060040        |                |                  | K    | 1581.717326       | 791.362301      | 1564.690777    | 782.849027       | 1563.706761    | 782.357019        | 15 |
| 3  | 297.192117  | 149.099696      | 280.165568     | 140.586422       |                |                  | P    | 1453.622363       | 727.314820      | 1436.595814    | 718.801545       | 1435.611798    | 718.309537        | 14 |
| 4  | 394.244881  | 197.626079      | 377.218332     | 189.112804       |                |                  | P    | 1356.569599       | 678.788438      | 1339.543050    | 670.275163       | 1338.559034    | 669.783155        | 13 |
| 5  | 481.276909  | 241.142092      | 464.250360     | 232.628818       | 463.266344     | 232.136810       | S    | 1259.516835       | 630.262056      | 1242.490286    | 621.748781       | 1241.506270    | 621.256773        | 12 |
| 6  | 568.308937  | 284.658107      | 551.282388     | 276.144832       | 550.298372     | 275.652824       | S    | 1172.484807       | 586.746042      | 1155.458258    | 578.232767       | 1154.474242    | 577.740759        | 11 |
| 7  | 655.340965  | 328.174121      | 638.314416     | 319.660846       | 637.330400     | 319.168838       | S    | 1085.452779       | 543.230028      | 1068.426230    | 534.716753       | 1067.442214    | 534.224745        | 10 |
| 8  | 742.372993  | 371.690135      | 725.346444     | 363.176860       | 724.362428     | 362.684852       | S    | <b>998.420751</b> | 499.714014      | 981.394202     | 491.200739       | 980.410186     | 490.708731        | 9  |
| 9  | 843.420672  | 422.213974      | 826.394123     | 413.700699       | 825.410107     | 413.208691       | T    | <b>911.388723</b> | 456.198000      | 894.362174     | 447.684725       | 893.378158     | 447.192717        | 8  |
| 10 | 1003.451321 | 502.229299      | 986.424772     | 493.716024       | 985.440756     | 493.224016       | C    | <b>810.341044</b> | 405.674160      | 793.314495     | 397.160886       | 792.330479     | 396.668878        | 7  |
| 11 | 1104.499000 | 552.753138      | 1087.472451    | 544.239864       | 1086.488435    | 543.747856       | T    | <b>650.310395</b> | 325.658836      | 633.283846     | 317.145561       | 632.299830     | 316.653553        | 6  |
| 12 | 1219.525943 | 610.266610      | 1202.499394    | 601.753335       | 1201.515378    | 601.261327       | D    | <b>549.262716</b> | 275.134996      | 532.236167     | 266.621722       | 531.252151     | 266.129714        | 5  |
| 13 | 1306.557971 | 653.782624      | 1289.531422    | 645.269349       | 1288.547406    | 644.777341       | S    | <b>434.235773</b> | 217.621524      | 417.209224     | 209.108250       | 416.225208     | 208.616242        | 4  |
| 14 | 1377.595085 | 689.301181      | 1360.568536    | 680.787906       | 1359.584520    | 680.295898       | A    | <b>347.203745</b> | 174.105510      | 330.177196     | 165.592236       | 329.193180     | 165.100228        | 3  |
| 15 | 1478.642764 | 739.825020      | 1461.616215    | 731.311746       | 1460.632199    | 730.819738       | T    | 276.166631        | 138.586953      | 259.140082     | 130.073679       | 258.156066     | <b>129.581671</b> | 2  |
| 16 |             |                 |                |                  |                |                  | R    | 175.118952        | 88.063114       | 158.092403     | 79.549839        |                |                   | 1  |

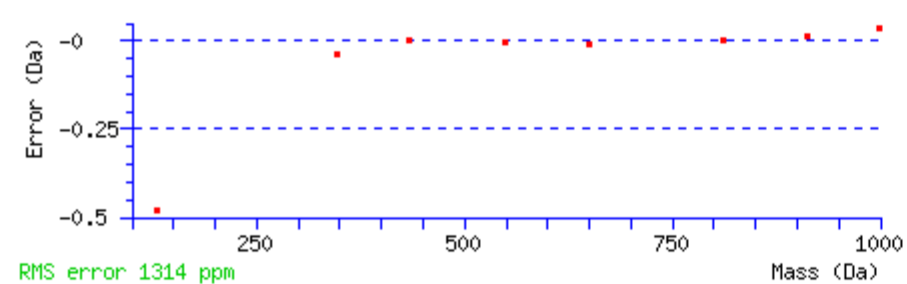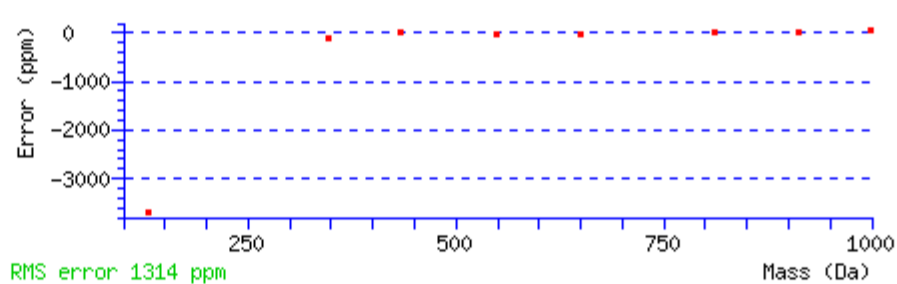

NCBI BLAST search of **AKPPSSSSTCTDSATR**

(Parameters: blastp, nr protein database, expect=20000, no filter, PAM30)

Other BLAST [web gateways](#)

All matches to this query

| Score | Mr(calc):   | Delta    | Sequence                         |
|-------|-------------|----------|----------------------------------|
| 54.0  | 1651.747162 | 0.002870 | <a href="#">AKPPSSSSTCTDSATR</a> |
| 1.6   | 1651.748688 | 0.001344 | <a href="#">ACLFSSVAQGYFRM</a>   |
| 0.5   | 1651.738785 | 0.011247 | <a href="#">WHVCPYCAKEFR</a>     |

Mascot: <http://www.matrixscience.com/>

**MATRIX SCIENCE Mascot Search Results**

**Peptide View**

MS/MS Fragmentation of **ELVGPPLAETVFTP**K

Found in **RBP2\_HUMAN**, E3 SUMO-protein ligase RanBP2 OS=Homo sapiens GN=RANBP2 PE=1 SV=2

Match to Query 46513: 1596.881048 from(799.447800,2+) rtinseconds(3318) index(43964)

Title: Locus:1.1.1.2808.41

Data file 2011-11-12 - TFD - EP 5-1.mgf

Click mouse within plot area to zoom in by factor of two about that point

Or, Plot from  to  Da

Label all possible matches  Label matches used for scoring

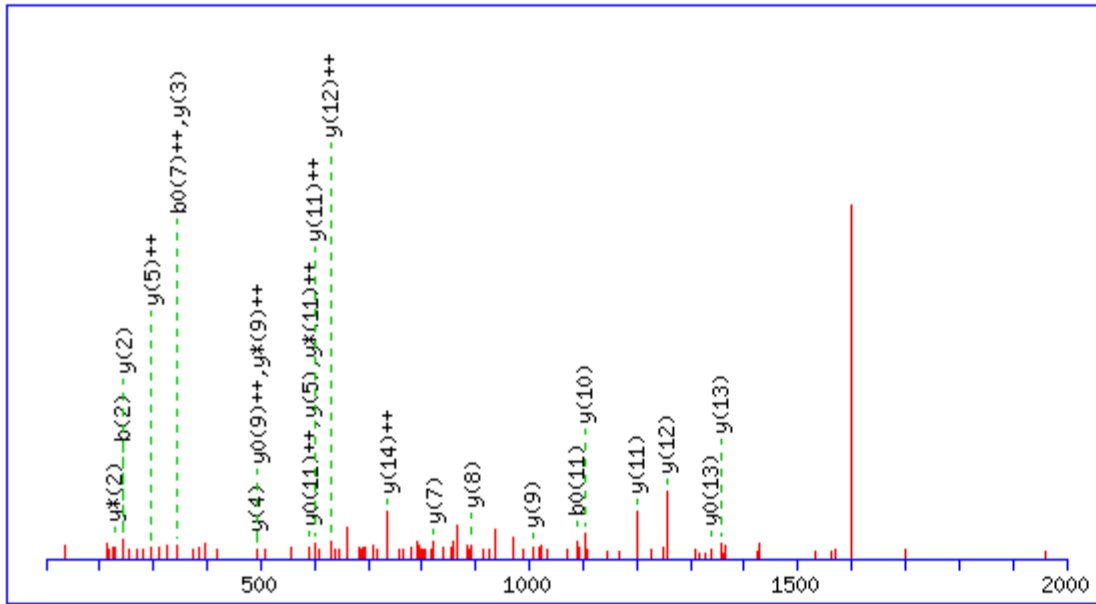

Monoisotopic mass of neutral peptide Mr(calc): 1596.876312

Fixed modifications: Propionamide (C) (apply to specified residues or termini only)

Ions Score: 51 Expect: 1.7e-005

Matches : 24/136 fragment ions using 54 most intense peaks [\(help\)](#)

| #  | b                 | b <sup>++</sup> | b <sup>0</sup>     | b <sup>0++</sup>  | Seq. | y                  | y <sup>++</sup>   | y <sup>*</sup>    | y <sup>*++</sup>  | y <sup>0</sup>     | y <sup>0++</sup>  | #  |
|----|-------------------|-----------------|--------------------|-------------------|------|--------------------|-------------------|-------------------|-------------------|--------------------|-------------------|----|
| 1  | 130.049869        | 65.528572       | 112.039304         | 56.523290         | E    |                    |                   |                   |                   |                    |                   | 15 |
| 2  | <b>243.133933</b> | 122.070605      | 225.123368         | 113.065322        | L    | 1468.840995        | <b>734.924136</b> | 1451.814446       | 726.410861        | 1450.830430        | 725.918853        | 14 |
| 3  | 342.202347        | 171.604812      | 324.191782         | 162.599529        | V    | <b>1355.756931</b> | 678.382104        | 1338.730382       | 669.868829        | <b>1337.746366</b> | 669.376821        | 13 |
| 4  | 399.223811        | 200.115544      | 381.213246         | 191.110261        | G    | <b>1256.688517</b> | <b>628.847897</b> | 1239.661968       | 620.334622        | 1238.677952        | 619.842614        | 12 |
| 5  | 496.276575        | 248.641926      | 478.266010         | 239.636643        | P    | <b>1199.667053</b> | <b>600.337165</b> | 1182.640504       | <b>591.823890</b> | 1181.656488        | <b>591.331882</b> | 11 |
| 6  | 593.329339        | 297.168308      | 575.318774         | 288.163025        | P    | <b>1102.614289</b> | 551.810783        | 1085.587740       | 543.297508        | 1084.603724        | 542.805500        | 10 |
| 7  | 706.413403        | 353.710340      | 688.402838         | <b>344.705057</b> | L    | <b>1005.561525</b> | 503.284401        | 988.534976        | <b>494.771126</b> | 987.550960         | <b>494.279118</b> | 9  |
| 8  | 777.450517        | 389.228897      | 759.439952         | 380.223614        | A    | <b>892.477461</b>  | 446.742369        | 875.450912        | 438.229094        | 874.466896         | 437.737086        | 8  |
| 9  | 906.493110        | 453.750193      | 888.482545         | 444.744911        | E    | <b>821.440347</b>  | 411.223812        | 804.413798        | 402.710537        | 803.429782         | 402.218529        | 7  |
| 10 | 1007.540789       | 504.274033      | 989.530224         | 495.268750        | T    | 692.397754         | 346.702515        | 675.371205        | 338.189241        | 674.387189         | 337.697233        | 6  |
| 11 | 1106.609203       | 553.808240      | <b>1088.598638</b> | 544.802957        | V    | <b>591.350075</b>  | <b>296.178676</b> | 574.323526        | 287.665401        | 573.339510         | 287.173393        | 5  |
| 12 | 1253.677617       | 627.342447      | 1235.667052        | 618.337164        | F    | <b>492.281661</b>  | 246.644469        | 475.255112        | 238.131194        | 474.271096         | 237.639186        | 4  |
| 13 | 1354.725296       | 677.866286      | 1336.714731        | 668.861004        | T    | <b>345.213247</b>  | 173.110262        | 328.186698        | 164.596987        | 327.202682         | 164.104979        | 3  |
| 14 | 1451.778060       | 726.392668      | 1433.767495        | 717.387386        | P    | <b>244.165568</b>  | 122.586422        | <b>227.139019</b> | 114.073148        |                    |                   | 2  |
| 15 |                   |                 |                    |                   | K    | 147.112804         | 74.060040         | 130.086255        | 65.546765         |                    |                   | 1  |

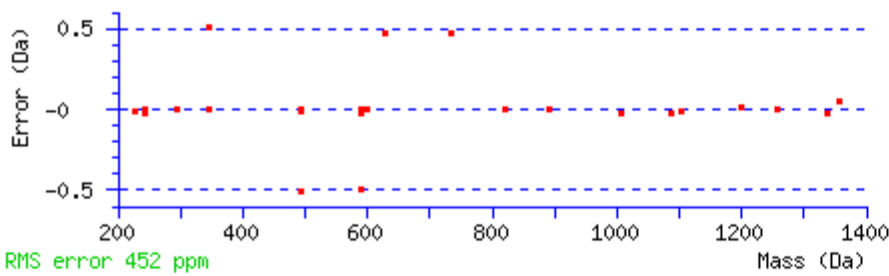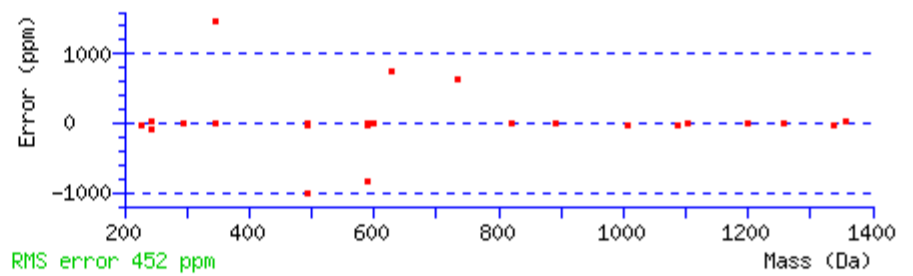

NCBI BLAST search of [ELVGPPLAETVFTP](#)K

(Parameters: blastp, nr protein database, expect=20000, no filter, PAM30)

Other BLAST [web gateways](#)

**All matches to this query**

| Score | Mr(calc):   | Delta    | Sequence                         |
|-------|-------------|----------|----------------------------------|
| 51.3  | 1596.876312 | 0.004736 | <a href="#">ELVGPPLAETVFTP</a> K |
| 0.6   | 1596.872284 | 0.008764 | <a href="#">EPVVGGTLSPLALANK</a> |

# Mascot Search Results

## Peptide View

MS/MS Fragmentation of **LNFGDDIPSALR**

Found in **CHIP\_HUMAN**, E3 ubiquitin-protein ligase CHIP OS=Homo sapiens GN=STUB1 PE=1 SV=2

Match to Query 36347: 1316.685308 from(659.349930,2+) rtinseconds(3096) index(43702)

Title: Locus:1.1.1.2503.23

Data file 2011-11-10 - TFD - EP 4-4.mgf

Click mouse within plot area to zoom in by factor of two about that point

Or, Plot from  to  Da

Label all possible matches  Label matches used for scoring

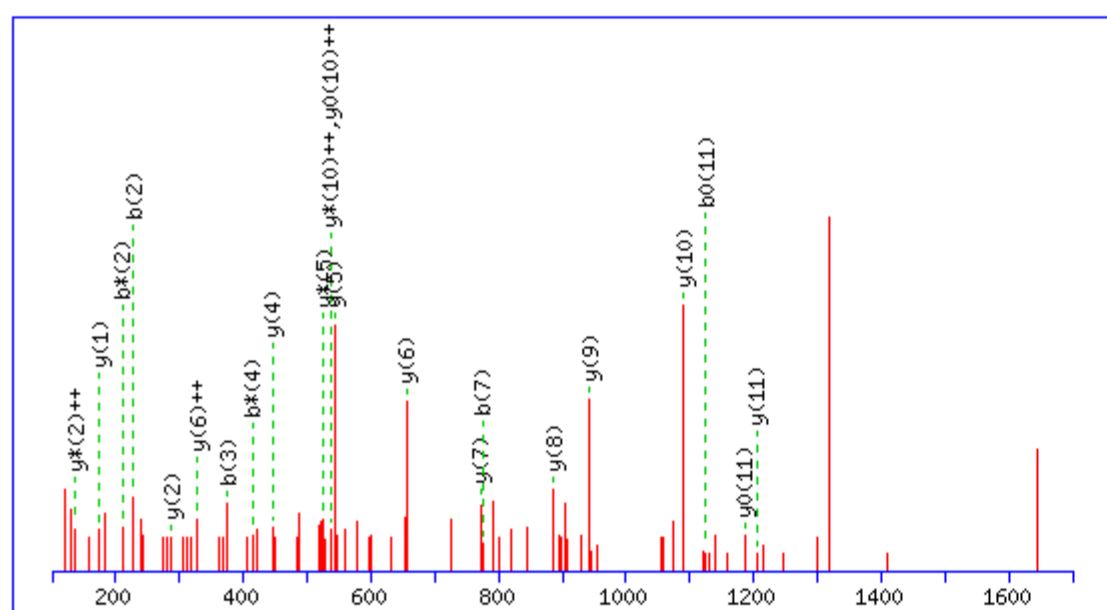

Monoisotopic mass of neutral peptide Mr(calc): 1316.672455

Fixed modifications: Propionamide (C) (apply to specified residues or termini only)

Ions Score: 45 Expect: 0.00025

Matches : 22/116 fragment ions using 66 most intense peaks [\(help\)](#)

| #  | b                 | b <sup>++</sup> | b <sup>*</sup>    | b <sup>*++</sup> | b <sup>0</sup>     | b <sup>0++</sup> | Seq. | y                  | y <sup>++</sup>   | y <sup>*</sup>    | y <sup>*++</sup>  | y <sup>0</sup>     | y <sup>0++</sup>  | #  |
|----|-------------------|-----------------|-------------------|------------------|--------------------|------------------|------|--------------------|-------------------|-------------------|-------------------|--------------------|-------------------|----|
| 1  | 114.091340        | 57.549308       |                   |                  |                    |                  | L    |                    |                   |                   |                   |                    |                   | 12 |
| 2  | <b>228.134267</b> | 114.570771      | <b>211.107718</b> | 106.057497       |                    |                  | N    | <b>1204.595677</b> | 602.801477        | 1187.569128       | 594.288202        | <b>1186.585112</b> | 593.796194        | 11 |
| 3  | <b>375.202681</b> | 188.104978      | 358.176132        | 179.591704       |                    |                  | F    | <b>1090.552750</b> | 545.780013        | 1073.526201       | <b>537.266738</b> | 1072.542185        | <b>536.774730</b> | 10 |
| 4  | 432.224145        | 216.615710      | <b>415.197596</b> | 208.102436       |                    |                  | G    | <b>943.484336</b>  | 472.245806        | 926.457787        | 463.732531        | 925.473771         | 463.240523        | 9  |
| 5  | 547.251088        | 274.129182      | 530.224539        | 265.615907       | 529.240523         | 265.123899       | D    | <b>886.462872</b>  | 443.735074        | 869.436323        | 435.221799        | 868.452307         | 434.729791        | 8  |
| 6  | 662.278031        | 331.642653      | 645.251482        | 323.129379       | 644.267466         | 322.637371       | D    | <b>771.435929</b>  | 386.221603        | 754.409380        | 377.708328        | 753.425364         | 377.216320        | 7  |
| 7  | <b>775.362095</b> | 388.184686      | 758.335546        | 379.671411       | 757.351530         | 379.179403       | I    | <b>656.408986</b>  | <b>328.708131</b> | 639.382437        | 320.194857        | 638.398421         | 319.702849        | 6  |
| 8  | 872.414859        | 436.711068      | 855.388310        | 428.197793       | 854.404294         | 427.705785       | P    | <b>543.324922</b>  | 272.166099        | <b>526.298373</b> | 263.652825        | 525.314357         | 263.160817        | 5  |
| 9  | 959.446887        | 480.227082      | 942.420338        | 471.713807       | 941.436322         | 471.221799       | S    | <b>446.272158</b>  | 223.639717        | 429.245609        | 215.126442        | 428.261593         | 214.634434        | 4  |
| 10 | 1030.484001       | 515.745639      | 1013.457452       | 507.232364       | 1012.473436        | 506.740356       | A    | 359.240130         | 180.123703        | 342.213581        | 171.610428        |                    |                   | 3  |
| 11 | 1143.568065       | 572.287670      | 1126.541516       | 563.774396       | <b>1125.557500</b> | 563.282388       | L    | <b>288.203016</b>  | 144.605146        | 271.176467        | <b>136.091871</b> |                    |                   | 2  |
| 12 |                   |                 |                   |                  |                    |                  | R    | <b>175.118952</b>  | 88.063114         | 158.092403        | 79.549839         |                    |                   | 1  |

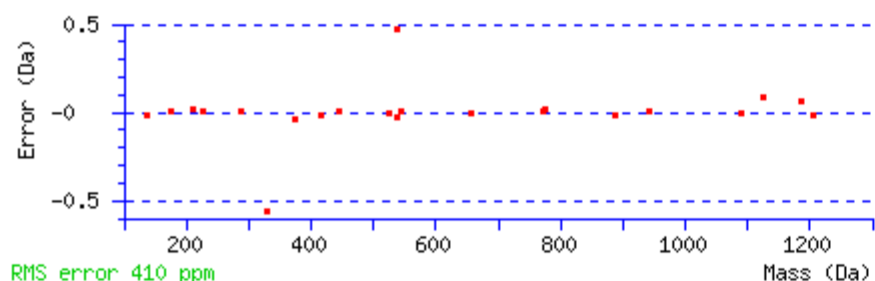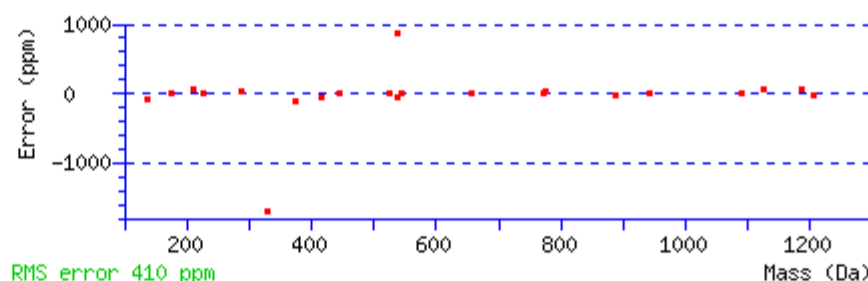

NCBI BLAST search of [LNFGDDIPSALR](#)

(Parameters: blastp, nr protein database, expect=20000, no filter, PAM30)

Other BLAST [web gateways](#)

## All matches to this query

| Score | Mr(calc):   | Delta    | Sequence                     |
|-------|-------------|----------|------------------------------|
| 45.3  | 1316.672455 | 0.012853 | <a href="#">LNFGDDIPSALR</a> |
| 1.9   | 1316.675842 | 0.009466 | <a href="#">NSVPVTVAMVER</a> |
| 1.2   | 1316.675827 | 0.009481 | <a href="#">QVQLMQSGAEVK</a> |

**MATRIX SCIENCE Mascot Search Results**

**Peptide View**

MS/MS Fragmentation of **VLLPVWEA EGLGLR**

Found in **HECD3\_HUMAN**, E3 ubiquitin-protein ligase HECTD3 OS=Homo sapiens GN=HECTD3 PE=1 SV=1

Match to Query 49672: 1550.889988 from(776.452270,2+) rtinseconds(3894) index(57725)

Title: Locus:1.1.1.2910.40

Data file 2011-11-10 - TFD - EP 3-2.mgf

Click mouse within plot area to zoom in by factor of two about that point

Or, Plot from  to  Da

Label all possible matches  Label matches used for scoring

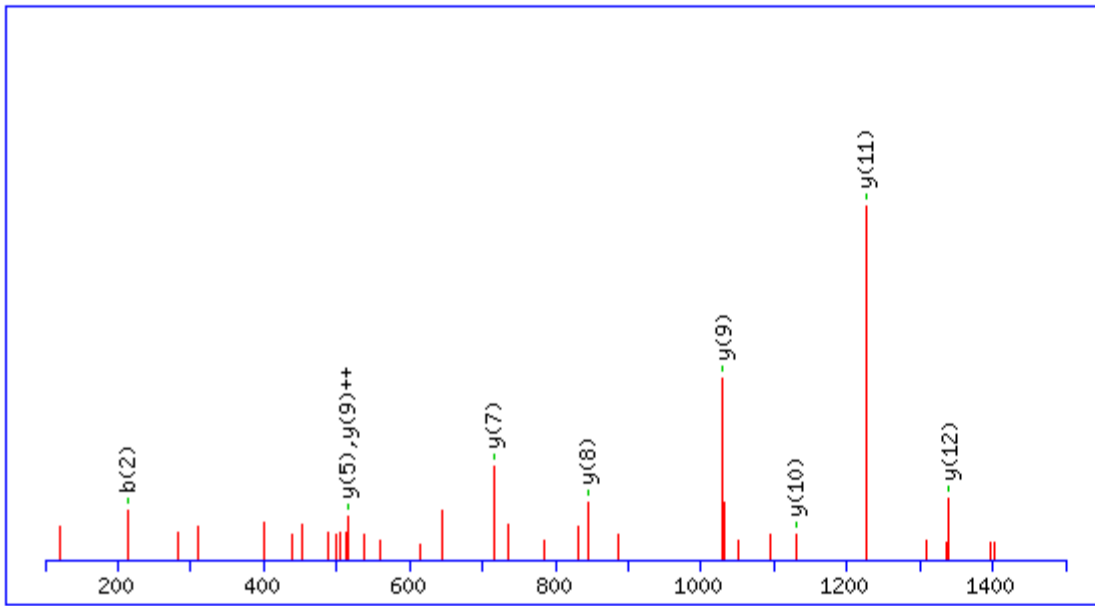

Monoisotopic mass of neutral peptide Mr(calc): 1550.882050

Fixed modifications: Propionamide (C) (apply to specified residues or termini only)

Ions Score: 49 Expect: 3.7e-005

Matches : 9/108 fragment ions using 12 most intense peaks ([help](#))

| #  | b                 | b <sup>++</sup> | b <sup>0</sup> | b <sup>0++</sup> | Seq. | y                  | y <sup>++</sup>   | y <sup>*</sup> | y <sup>*++</sup> | y <sup>0</sup> | y <sup>0++</sup> | #  |
|----|-------------------|-----------------|----------------|------------------|------|--------------------|-------------------|----------------|------------------|----------------|------------------|----|
| 1  | 100.075690        | 50.541483       |                |                  | V    |                    |                   |                |                  |                |                  | 14 |
| 2  | <b>213.159754</b> | 107.083515      |                |                  | L    | 1452.820927        | 726.914101        | 1435.794378    | 718.400827       | 1434.810362    | 717.908819       | 13 |
| 3  | 326.243818        | 163.625547      |                |                  | L    | <b>1339.736863</b> | 670.372069        | 1322.710314    | 661.858795       | 1321.726298    | 661.366787       | 12 |
| 4  | 423.296582        | 212.151929      |                |                  | P    | <b>1226.652799</b> | 613.830037        | 1209.626250    | 605.316763       | 1208.642234    | 604.824755       | 11 |
| 5  | 522.364996        | 261.686136      |                |                  | V    | <b>1129.600035</b> | 565.303655        | 1112.573486    | 556.790381       | 1111.589470    | 556.298373       | 10 |
| 6  | 708.444309        | 354.725793      |                |                  | W    | <b>1030.531621</b> | <b>515.769448</b> | 1013.505072    | 507.256174       | 1012.521056    | 506.764166       | 9  |
| 7  | 837.486902        | 419.247089      | 819.476337     | 410.241807       | E    | <b>844.452308</b>  | 422.729792        | 827.425759     | 414.216517       | 826.441743     | 413.724509       | 8  |
| 8  | 908.524016        | 454.765646      | 890.513451     | 445.760363       | A    | <b>715.409715</b>  | 358.208495        | 698.383166     | 349.695221       | 697.399150     | 349.203213       | 7  |
| 9  | 1037.566609       | 519.286943      | 1019.556044    | 510.281660       | E    | 644.372601         | 322.689938        | 627.346052     | 314.176664       | 626.362036     | 313.684656       | 6  |
| 10 | 1094.588073       | 547.797674      | 1076.577508    | 538.792392       | G    | <b>515.330008</b>  | 258.168642        | 498.303459     | 249.655367       |                |                  | 5  |
| 11 | 1207.672137       | 604.339706      | 1189.661572    | 595.334424       | L    | 458.308544         | 229.657910        | 441.281995     | 221.144635       |                |                  | 4  |
| 12 | 1264.693601       | 632.850438      | 1246.683036    | 623.845156       | G    | 345.224480         | 173.115878        | 328.197931     | 164.602603       |                |                  | 3  |
| 13 | 1377.777665       | 689.392470      | 1359.767100    | 680.387188       | L    | 288.203016         | 144.605146        | 271.176467     | 136.091871       |                |                  | 2  |
| 14 |                   |                 |                |                  | R    | 175.118952         | 88.063114         | 158.092403     | 79.549839        |                |                  | 1  |

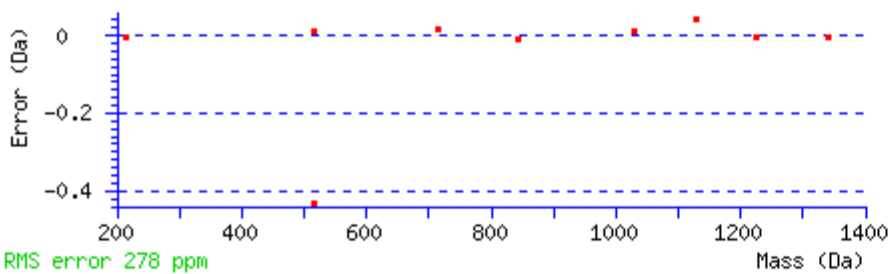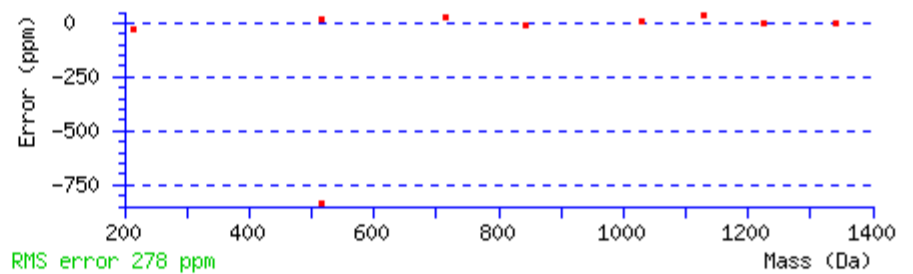

NCBI BLAST search of [VLLPVWEA EGLGLR](#)

(Parameters: blastp, nr protein database, expect=20000, no filter, PAM30)

Other BLAST [web gateways](#)

All matches to this query

| Score | Mr(calc):   | Delta    | Sequence                        |
|-------|-------------|----------|---------------------------------|
| 49.5  | 1550.882050 | 0.007938 | <a href="#">VLLPVWEA EGLGLR</a> |

Mascot: <http://www.matrixscience.com/>

# Mascot Search Results

## Peptide View

MS/MS Fragmentation of **DVDTPSGTNSGAGK**

Found in **RBX1\_HUMAN**, E3 ubiquitin-protein ligase RBX1 OS=Homo sapiens GN=RBX1 PE=1 SV=1

Match to Query 645175: 1304.587808 from(653.301180,2+) rtinseconds(874) index(157642)

Title: Locus:1.1.1.1018.8

Data file C:\Program Files (x86)\Matrix Science\Mascot Daemon\mgf\3 TFD - Epitel - R2\mascot\_daemon\_merge.mgf

Click mouse within plot area to zoom in by factor of two about that point

Or, Plot from  to  Da

Label all possible matches  Label matches used for scoring

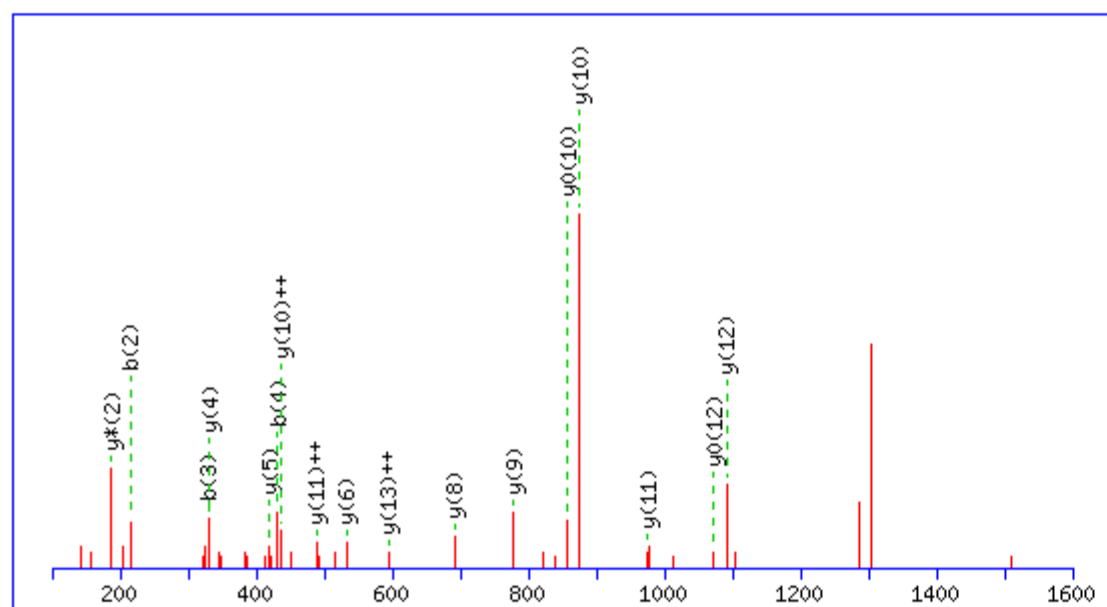

Monoisotopic mass of neutral peptide Mr(calc): 1304.584457

Fixed modifications: Carbamidomethyl (C) (apply to specified residues or termini only)

Ions Score: 60 Expect: 1e-005

Matches : 17/132 fragment ions using 26 most intense peaks [\(help\)](#)

| #  | b                 | b <sup>++</sup> | b <sup>*</sup> | b <sup>*++</sup> | b <sup>0</sup> | b <sup>0++</sup> | Seq. | y                  | y <sup>++</sup>   | y <sup>*</sup>    | y <sup>*++</sup> | y <sup>0</sup>     | y <sup>0++</sup> | #  |
|----|-------------------|-----------------|----------------|------------------|----------------|------------------|------|--------------------|-------------------|-------------------|------------------|--------------------|------------------|----|
| 1  | 116.034219        | 58.520748       |                |                  | 98.023654      | 49.515465        | D    |                    |                   |                   |                  |                    |                  | 14 |
| 2  | <b>215.102633</b> | 108.054954      |                |                  | 197.092068     | 99.049672        | V    | 1190.564772        | <b>595.786024</b> | 1173.538223       | 587.272750       | 1172.554207        | 586.780741       | 13 |
| 3  | <b>330.129576</b> | 165.568426      |                |                  | 312.119011     | 156.563144       | D    | <b>1091.496358</b> | 546.251817        | 1074.469809       | 537.738543       | <b>1073.485793</b> | 537.246535       | 12 |
| 4  | <b>431.177255</b> | 216.092266      |                |                  | 413.166690     | 207.086983       | T    | <b>976.469415</b>  | <b>488.738346</b> | 959.442866        | 480.225071       | 958.458850         | 479.733063       | 11 |
| 5  | 528.230019        | 264.618648      |                |                  | 510.219454     | 255.613365       | P    | <b>875.421736</b>  | <b>438.214506</b> | 858.395187        | 429.701232       | <b>857.411171</b>  | 429.209224       | 10 |
| 6  | 615.262047        | 308.134662      |                |                  | 597.251482     | 299.129379       | S    | <b>778.368972</b>  | 389.688124        | 761.342423        | 381.174849       | 760.358407         | 380.682841       | 9  |
| 7  | 672.283511        | 336.645394      |                |                  | 654.272946     | 327.640111       | G    | <b>691.336944</b>  | 346.172110        | 674.310395        | 337.658836       | 673.326379         | 337.166828       | 8  |
| 8  | 773.331190        | 387.169233      |                |                  | 755.320625     | 378.163951       | T    | 634.315480         | 317.661378        | 617.288931        | 309.148103       | 616.304915         | 308.656095       | 7  |
| 9  | 887.374117        | 444.190697      | 870.347568     | 435.677422       | 869.363552     | 435.185414       | N    | <b>533.267801</b>  | 267.137539        | 516.241252        | 258.624264       | 515.257236         | 258.132256       | 6  |
| 10 | 974.406145        | 487.706711      | 957.379596     | 479.193436       | 956.395580     | 478.701428       | S    | <b>419.224874</b>  | 210.116075        | 402.198325        | 201.602800       | 401.214309         | 201.110792       | 5  |
| 11 | 1031.427609       | 516.217443      | 1014.401060    | 507.704168       | 1013.417044    | 507.212160       | G    | <b>332.192846</b>  | 166.600061        | 315.166297        | 158.086786       |                    |                  | 4  |
| 12 | 1102.464723       | 551.736000      | 1085.438174    | 543.222725       | 1084.454158    | 542.730717       | A    | 275.171382         | 138.089329        | 258.144833        | 129.576054       |                    |                  | 3  |
| 13 | 1159.486187       | 580.246732      | 1142.459638    | 571.733457       | 1141.475622    | 571.241449       | G    | 204.134268         | 102.570772        | <b>187.107719</b> | 94.057497        |                    |                  | 2  |
| 14 |                   |                 |                |                  |                |                  | K    | 147.112804         | 74.060040         | 130.086255        | 65.546765        |                    |                  | 1  |

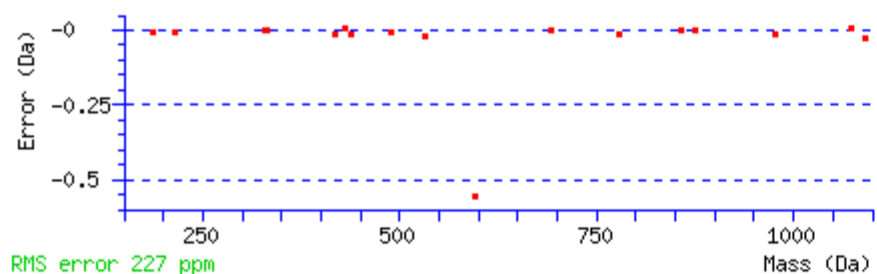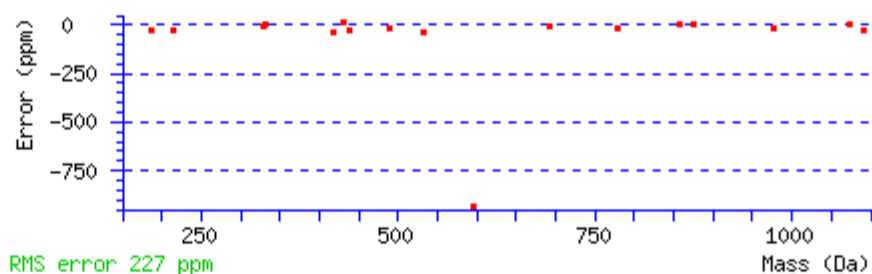

NCBI BLAST search of **DVDTPSGTNSGAGK**

(Parameters: blastp, nr protein database, expect=20000, no filter, PAM30)

Other BLAST [web gateways](#)

All matches to this query

| Score | Mr(calc):   | Delta    | Sequence                       |
|-------|-------------|----------|--------------------------------|
| 59.7  | 1304.584457 | 0.003351 | <a href="#">DVDTPSGTNSGAGK</a> |

Mascot: <http://www.matrixscience.com/>

# **MASCOT** Mascot Search Results

## Peptide View

MS/MS Fragmentation of **IVLLSANSIR**

Found in **UBR5\_HUMAN**, E3 ubiquitin-protein ligase UBR5 OS=Homo sapiens GN=UBR5 PE=1 SV=2

Match to Query 22384: 1084.652008 from(543.333280,2+) rtinseconds(2521) index(29449)

Title: Locus:1.1.1.2228.19

Data file 2011-11-10 - TFD - EP 3-6.mgf

Click mouse within plot area to zoom in by factor of two about that point

Or, Plot from  to  Da

Label all possible matches  Label matches used for scoring

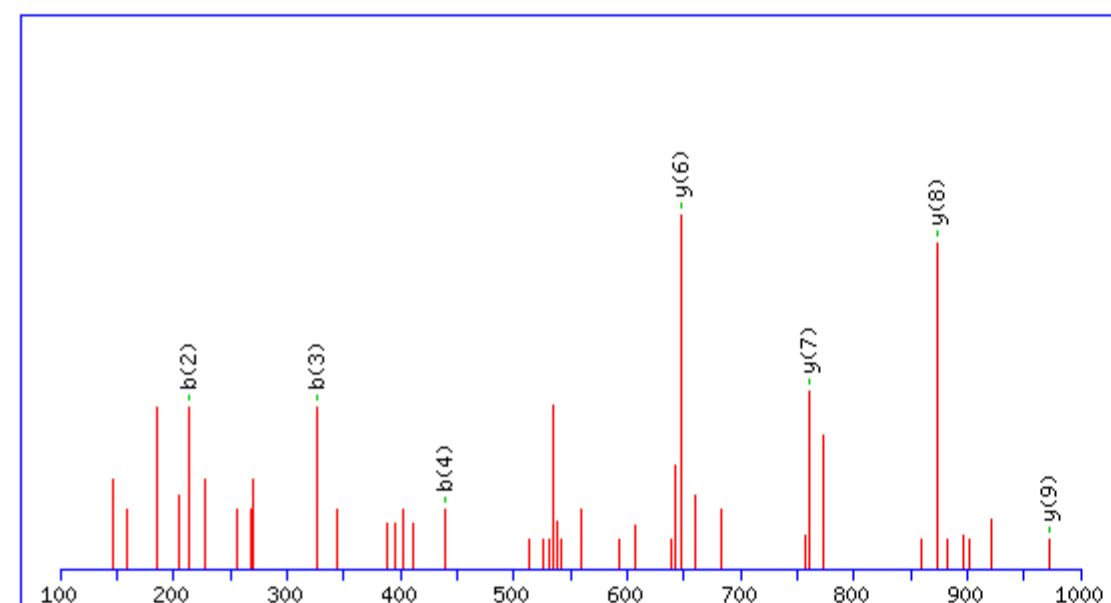

Monoisotopic mass of neutral peptide Mr(calc): 1084.660416

Fixed modifications: Propionamide (C) (apply to specified residues or termini only)

Ions Score: 33 Expect: 0.0028

Matches : 7/84 fragment ions using 9 most intense peaks ([help](#))

| #  | b                 | b <sup>++</sup> | b <sup>*</sup> | b <sup>*++</sup> | b <sup>0</sup> | b <sup>0++</sup> | Seq. | y                 | y <sup>++</sup> | y <sup>*</sup> | y <sup>*++</sup> | y <sup>0</sup> | y <sup>0++</sup> | #  |
|----|-------------------|-----------------|----------------|------------------|----------------|------------------|------|-------------------|-----------------|----------------|------------------|----------------|------------------|----|
| 1  | 114.091340        | 57.549308       |                |                  |                |                  | I    |                   |                 |                |                  |                |                  | 10 |
| 2  | <b>213.159754</b> | 107.083515      |                |                  |                |                  | V    | <b>972.583655</b> | 486.795466      | 955.557106     | 478.282191       | 954.573090     | 477.790183       | 9  |
| 3  | <b>326.243818</b> | 163.625547      |                |                  |                |                  | L    | <b>873.515241</b> | 437.261259      | 856.488692     | 428.747984       | 855.504676     | 428.255976       | 8  |
| 4  | <b>439.327882</b> | 220.167579      |                |                  |                |                  | L    | <b>760.431177</b> | 380.719227      | 743.404628     | 372.205952       | 742.420612     | 371.713944       | 7  |
| 5  | 526.359910        | 263.683593      |                |                  | 508.349345     | 254.678311       | S    | <b>647.347113</b> | 324.177195      | 630.320564     | 315.663920       | 629.336548     | 315.171912       | 6  |
| 6  | 597.397024        | 299.202150      |                |                  | 579.386459     | 290.196868       | A    | 560.315085        | 280.661181      | 543.288536     | 272.147906       | 542.304520     | 271.655898       | 5  |
| 7  | 711.439951        | 356.223614      | 694.413402     | 347.710339       | 693.429386     | 347.218331       | N    | 489.277971        | 245.142623      | 472.251422     | 236.629349       | 471.267406     | 236.137341       | 4  |
| 8  | 798.471979        | 399.739627      | 781.445430     | 391.226353       | 780.461414     | 390.734345       | S    | 375.235044        | 188.121160      | 358.208495     | 179.607886       | 357.224479     | 179.115878       | 3  |
| 9  | 911.556043        | 456.281659      | 894.529494     | 447.768385       | 893.545478     | 447.276377       | I    | 288.203016        | 144.605146      | 271.176467     | 136.091872       |                |                  | 2  |
| 10 |                   |                 |                |                  |                |                  | R    | 175.118952        | 88.063114       | 158.092403     | 79.549840        |                |                  | 1  |

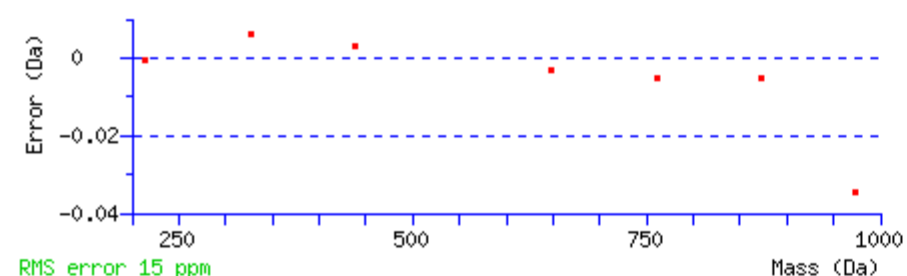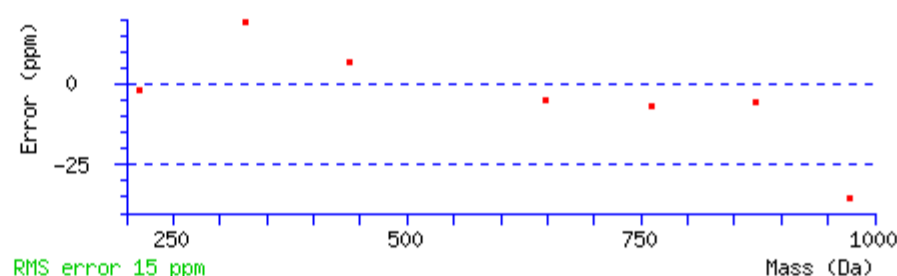

NCBI BLAST search of [IVLLSANSIR](#)

(Parameters: blastp, nr protein database, expect=20000, no filter, PAM30)

Other BLAST [web gateways](#)

All matches to this query

| Score | Mr(calc):   | Delta     | Sequence                    |
|-------|-------------|-----------|-----------------------------|
| 32.7  | 1084.660416 | -0.008408 | <a href="#">IVLLSANSIR</a>  |
| 31.9  | 1084.649200 | 0.002808  | <a href="#">LVLLGESAVGK</a> |
| 7.2   | 1084.660416 | -0.008408 | <a href="#">VIKTENIR</a>    |
| 7.2   | 1084.642670 | 0.009338  | <a href="#">VPLKGCLR</a>    |
| 6.3   | 1084.649200 | 0.002808  | <a href="#">LIIGESGVGK</a>  |
| 3.5   | 1084.649231 | 0.002777  | <a href="#">VIVVDLSVGK</a>  |
| 3.1   | 1084.649185 | 0.002823  | <a href="#">LTPLELKQK</a>   |

Mascot: <http://www.matrixscience.com/>

# **MATRIX** SCIENCE Mascot Search Results

## Peptide View

MS/MS Fragmentation of **GIVDLIEER**

Found in **EFGM\_HUMAN**, Elongation factor G, mitochondrial OS=Homo sapiens GN=GFM1 PE=1 SV=2

Match to Query 19958: 1042.569788 from(522.292170,2+) rtinseconds(3015) index(41428)

Title: Locus:1.1.1.2584.11

Data file 2011-11-10 - TFD - EP 3-2.mgf

Click mouse within plot area to zoom in by factor of two about that point

Or, Plot from  to  Da

Label all possible matches  Label matches used for scoring

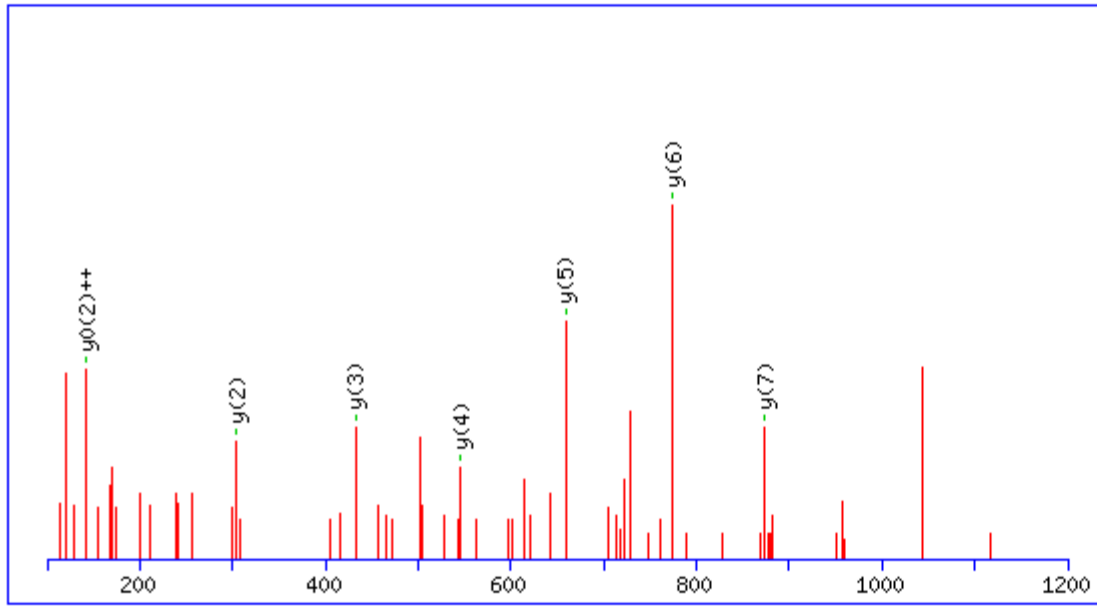

Monoisotopic mass of neutral peptide Mr(calc): 1042.565857

Fixed modifications: Propionamide (C) (apply to specified residues or termini only)

Ions Score: 51 Expect: 0.00015

Matches : 7/72 fragment ions using 9 most intense peaks ([help](#))

| # | b          | b <sup>++</sup> | b <sup>0</sup> | b <sup>0++</sup> | Seq.     | y                 | y <sup>++</sup> | y <sup>*</sup> | y <sup>**++</sup> | y <sup>0</sup> | y <sup>0++</sup>  | # |
|---|------------|-----------------|----------------|------------------|----------|-------------------|-----------------|----------------|-------------------|----------------|-------------------|---|
| 1 | 58.028740  | 29.518008       |                |                  | <b>G</b> |                   |                 |                |                   |                |                   | 9 |
| 2 | 171.112804 | 86.060040       |                |                  | <b>I</b> | 986.551687        | 493.779482      | 969.525138     | 485.266207        | 968.541122     | 484.774199        | 8 |
| 3 | 270.181218 | 135.594247      |                |                  | <b>V</b> | <b>873.467623</b> | 437.237450      | 856.441074     | 428.724175        | 855.457058     | 428.232167        | 7 |
| 4 | 385.208161 | 193.107719      | 367.197596     | 184.102436       | <b>D</b> | <b>774.399209</b> | 387.703243      | 757.372660     | 379.189968        | 756.388644     | 378.697960        | 6 |
| 5 | 498.292225 | 249.649751      | 480.281660     | 240.644468       | <b>L</b> | <b>659.372266</b> | 330.189771      | 642.345717     | 321.676497        | 641.361701     | 321.184489        | 5 |
| 6 | 611.376289 | 306.191783      | 593.365724     | 297.186500       | <b>I</b> | <b>546.288202</b> | 273.647739      | 529.261653     | 265.134464        | 528.277637     | 264.642456        | 4 |
| 7 | 740.418882 | 370.713079      | 722.408317     | 361.707797       | <b>E</b> | <b>433.204138</b> | 217.105707      | 416.177589     | 208.592432        | 415.193573     | 208.100424        | 3 |
| 8 | 869.461475 | 435.234376      | 851.450910     | 426.229093       | <b>E</b> | <b>304.161545</b> | 152.584410      | 287.134996     | 144.071136        | 286.150980     | <b>143.579128</b> | 2 |
| 9 |            |                 |                |                  | <b>R</b> | 175.118952        | 88.063114       | 158.092403     | 79.549839         |                |                   | 1 |

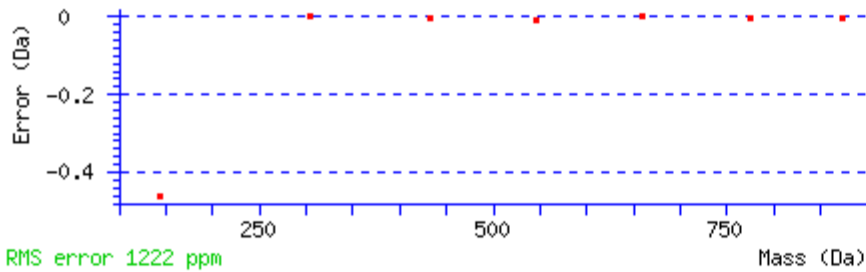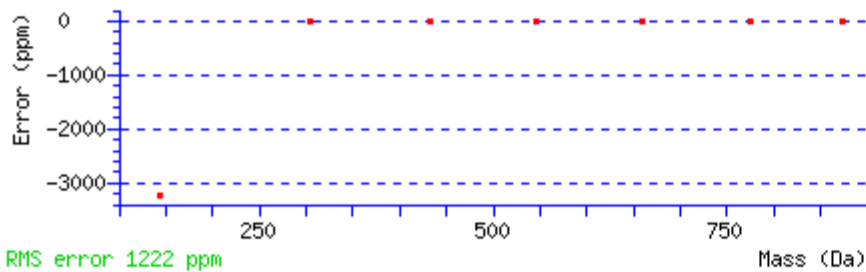

NCBI BLAST search of [GIVDLIEER](#)

(Parameters: blastp, nr protein database, expect=20000, no filter, PAM30)

Other BLAST [web gateways](#)

## All matches to this query

| Score | Mr(calc):   | Delta     | Sequence                  |
|-------|-------------|-----------|---------------------------|
| 51.5  | 1042.565857 | 0.003931  | <a href="#">GIVDLIEER</a> |
| 10.1  | 1042.577072 | -0.007284 | <a href="#">LRVLEER</a>   |
| 9.0   | 1042.577072 | -0.007284 | <a href="#">LGLKQAEER</a> |



# MASCOT SCIENCE Mascot Search Results

## Peptide View

MS/MS Fragmentation of **IVTSLGLK**

Found in **ETUDI\_HUMAN**, Elongation factor Tu GTP-binding domain-containing protein 1 OS=Homo sapiens GN=EFTUD1 PE=1 SV=2

Match to Query 2467: 829.528988 from(415.771770,2+) rtinseconds(1716) index(15046)

Title: Locus:1.1.1.2072.9

Data file 2011-11-13 - TFD - EP 7-5.mgf

Click mouse within plot area to zoom in by factor of two about that point

Or, Plot from  to  Da

Label all possible matches  Label matches used for scoring

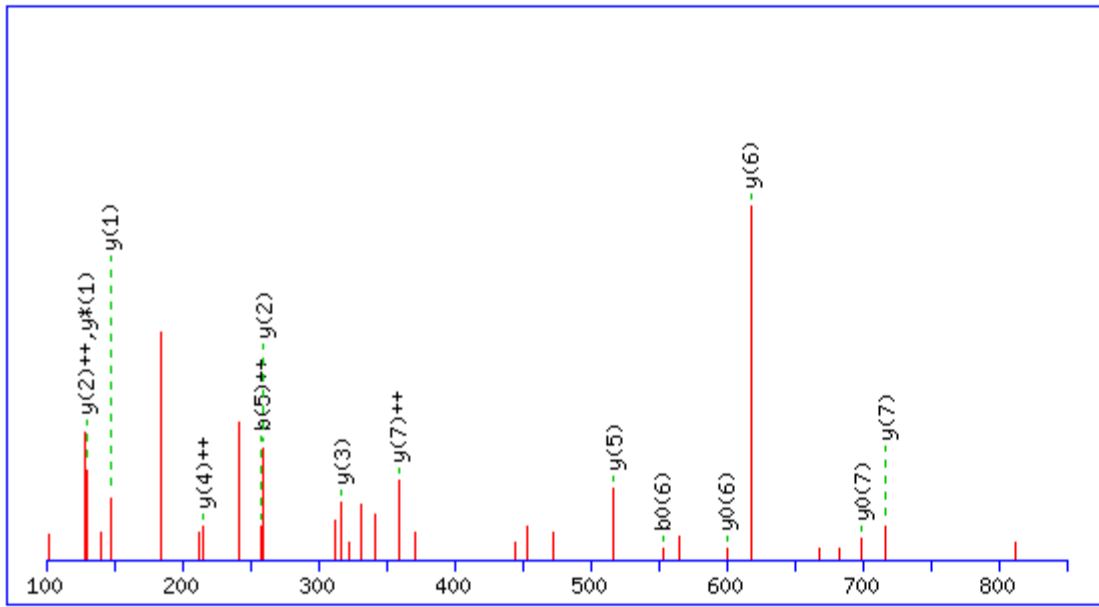

Monoisotopic mass of neutral peptide  $M_r(\text{calc})$ : 829.527298

Fixed modifications: Propionamide (C) (apply to specified residues or termini only)

Ions Score: 38 Expect: 0.00046

Matches : 14/58 fragment ions using 25 most intense peaks [\(help\)](#)

| # | b          | b <sup>++</sup> | b <sup>0</sup> | b <sup>0++</sup> | Seq. | y          | y <sup>++</sup> | y <sup>*</sup> | y <sup>+++</sup> | y <sup>0</sup> | y <sup>0++</sup> | # |
|---|------------|-----------------|----------------|------------------|------|------------|-----------------|----------------|------------------|----------------|------------------|---|
| 1 | 114.091340 | 57.549308       |                |                  | I    |            |                 |                |                  |                |                  | 8 |
| 2 | 213.159754 | 107.083515      |                |                  | V    | 717.450517 | 359.228897      | 700.423968     | 350.715622       | 699.439952     | 350.223614       | 7 |
| 3 | 314.207433 | 157.607354      | 296.196868     | 148.602072       | T    | 618.382103 | 309.694690      | 601.355554     | 301.181415       | 600.371538     | 300.689407       | 6 |
| 4 | 401.239461 | 201.123368      | 383.228896     | 192.118086       | S    | 517.334424 | 259.170850      | 500.307875     | 250.657576       | 499.323859     | 250.165568       | 5 |
| 5 | 514.323525 | 257.665401      | 496.312960     | 248.660118       | L    | 430.302396 | 215.654836      | 413.275847     | 207.141562       |                |                  | 4 |
| 6 | 571.344989 | 286.176133      | 553.334424     | 277.170850       | G    | 317.218332 | 159.112804      | 300.191783     | 150.599530       |                |                  | 3 |
| 7 | 684.429053 | 342.718165      | 666.418488     | 333.712882       | L    | 260.196868 | 130.602072      | 243.170319     | 122.088798       |                |                  | 2 |
| 8 |            |                 |                |                  | K    | 147.112804 | 74.060040       | 130.086255     | 65.546765        |                |                  | 1 |

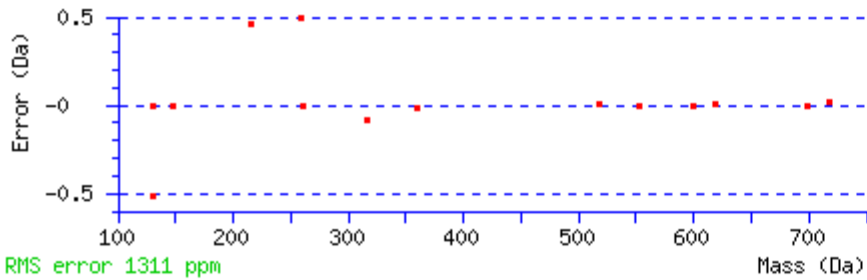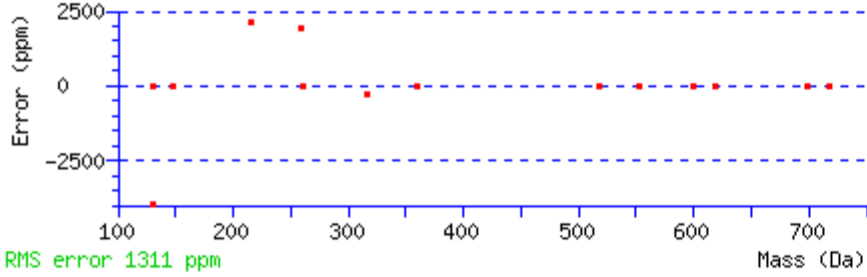

NCBI BLAST search of [IVTSLGLK](#)

(Parameters: blastp, nr protein database, expect=20000, no filter, PAM30)

Other BLAST [web gateways](#)

## All matches to this query

| Score | $M_r(\text{calc})$ : | Delta    | Sequence                 |
|-------|----------------------|----------|--------------------------|
| 37.6  | 829.527298           | 0.001690 | <a href="#">IVTSLGLK</a> |
| 37.4  | 829.527313           | 0.001675 | <a href="#">LVTTGVLK</a> |
| 23.2  | 829.527283           | 0.001705 | <a href="#">ETKLVLK</a>  |
| 22.9  | 829.527283           | 0.001705 | <a href="#">KETIVLK</a>  |
| 13.8  | 829.520752           | 0.008236 | <a href="#">VMRIAIAK</a> |
| 13.3  | 829.527283           | 0.001705 | <a href="#">ETLKVLIK</a> |
| 11.8  | 829.527283           | 0.001705 | <a href="#">IEKTVIK</a>  |
| 11.2  | 829.527267           | 0.001721 | <a href="#">ILSEKLIK</a> |
| 7.6   | 829.527283           | 0.001705 | <a href="#">KTEVLLK</a>  |
| 5.8   | 829.527267           | 0.001721 | <a href="#">LESKLLK</a>  |

# **MASCOT** Mascot Search Results

## Peptide View

MS/MS Fragmentation of **AGDNLAVLK**

Found in **ERMP1\_HUMAN**, Endoplasmic reticulum metalloproteinase 1 OS=Homo sapiens GN=ERMP1 PE=1 SV=2

Match to Query 15986: 1012.592388 from(507.303470,2+) rtinseconds(2945) index(39519)

Title: Locus:1.1.1.2542.10

Data file 2011-11-10 - TFD - EP 3-1.mgf

Click mouse within plot area to zoom in by factor of two about that point

Or, Plot from  to  Da

Label all possible matches  Label matches used for scoring

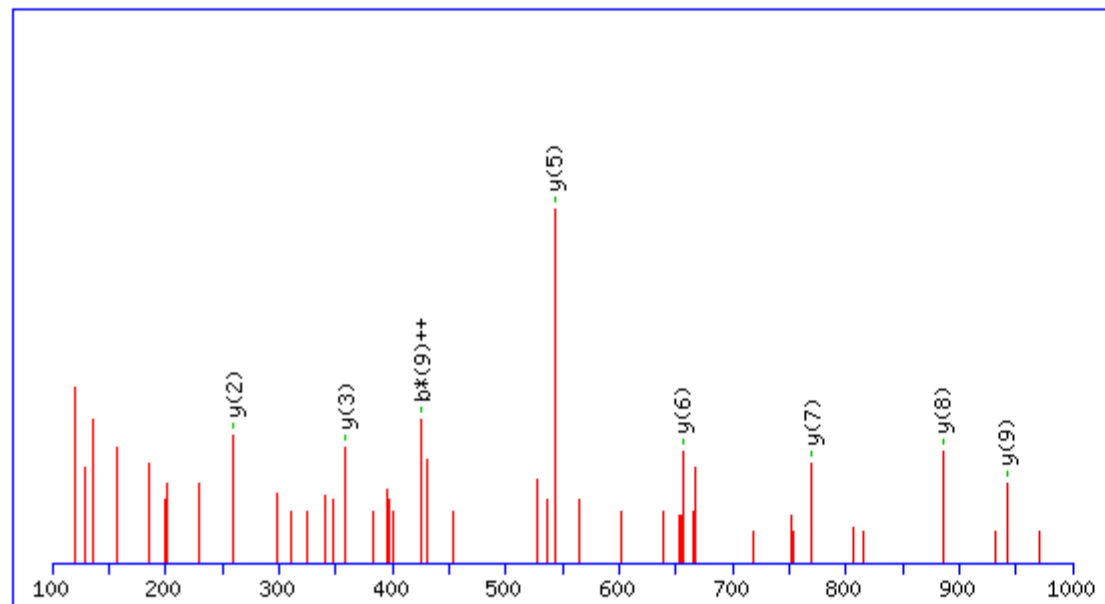

Monoisotopic mass of neutral peptide  $M_r(\text{calc})$ : 1012.591675

Fixed modifications: Propionamide (C) (apply to specified residues or termini only)

Ions Score: 64 Expect: 3e-006

Matches : 8/84 fragment ions using 9 most intense peaks [\(help\)](#)

| #  | b          | b <sup>++</sup> | b <sup>*</sup> | b <sup>*++</sup>  | b <sup>0</sup> | b <sup>0++</sup> | Seq. | y                 | y <sup>++</sup> | y <sup>*</sup> | y <sup>*++</sup> | y <sup>0</sup> | y <sup>0++</sup> | #  |
|----|------------|-----------------|----------------|-------------------|----------------|------------------|------|-------------------|-----------------|----------------|------------------|----------------|------------------|----|
| 1  | 72.044390  | 36.525833       |                |                   |                |                  | A    |                   |                 |                |                  |                |                  | 10 |
| 2  | 129.065854 | 65.036565       |                |                   |                |                  | G    | <b>942.561858</b> | 471.784567      | 925.535309     | 463.271293       | 924.551293     | 462.779285       | 9  |
| 3  | 244.092797 | 122.550037      |                |                   | 226.082232     | 113.544754       | D    | <b>885.540394</b> | 443.273835      | 868.513845     | 434.760561       | 867.529829     | 434.268553       | 8  |
| 4  | 358.135724 | 179.571500      | 341.109175     | 171.058226        | 340.125159     | 170.566218       | N    | <b>770.513451</b> | 385.760364      | 753.486902     | 377.247089       |                |                  | 7  |
| 5  | 471.219788 | 236.113532      | 454.193239     | 227.600258        | 453.209223     | 227.108250       | I    | <b>656.470524</b> | 328.738900      | 639.443975     | 320.225626       |                |                  | 6  |
| 6  | 584.303852 | 292.655564      | 567.277303     | 284.142290        | 566.293287     | 283.650282       | L    | <b>543.386460</b> | 272.196868      | 526.359911     | 263.683594       |                |                  | 5  |
| 7  | 655.340966 | 328.174121      | 638.314417     | 319.660847        | 637.330401     | 319.168839       | A    | 430.302396        | 215.654836      | 413.275847     | 207.141561       |                |                  | 4  |
| 8  | 754.409380 | 377.708328      | 737.382831     | 369.195054        | 736.398815     | 368.703046       | V    | <b>359.265282</b> | 180.136279      | 342.238733     | 171.623004       |                |                  | 3  |
| 9  | 867.493444 | 434.250360      | 850.466895     | <b>425.737086</b> | 849.482879     | 425.245078       | L    | <b>260.196868</b> | 130.602072      | 243.170319     | 122.088798       |                |                  | 2  |
| 10 |            |                 |                |                   |                |                  | K    | 147.112804        | 74.060040       | 130.086255     | 65.546765        |                |                  | 1  |

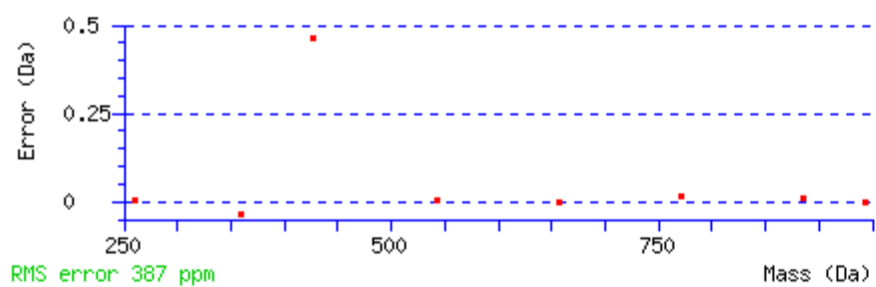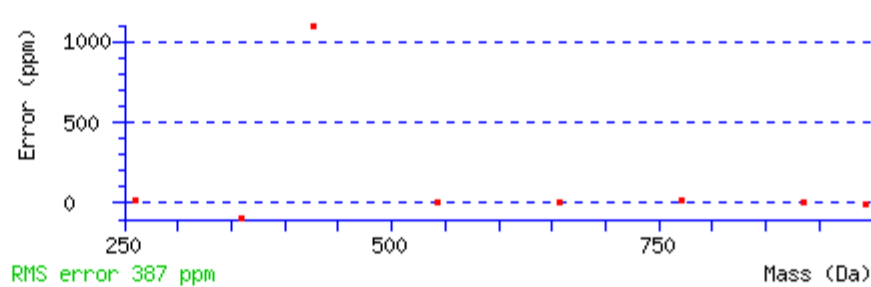

NCBI BLAST search of [AGDNLAVLK](#)

(Parameters: blastp, nr protein database, expect=20000, no filter, PAM30)

Other BLAST [web gateways](#)

## All matches to this query

| Score | $M_r(\text{calc})$ | Delta    | Sequence                  |
|-------|--------------------|----------|---------------------------|
| 63.5  | 1012.591675        | 0.000713 | <a href="#">AGDNLAVLK</a> |
| 8.1   | 1012.591705        | 0.000683 | <a href="#">TGTVGKLPK</a> |
| 4.3   | 1012.591690        | 0.000698 | <a href="#">AGEVPKVLK</a> |

# **MASCOT** Mascot Search Results

## Peptide View

MS/MS Fragmentation of **VMADQLR**

Found in **ECE2\_HUMAN**, Endothelin-converting enzyme 2 OS=Homo sapiens GN=ECE2 PE=1 SV=4

Match to Query 3846: 847.421048 from(424.717800,2+) rtinseconds(922) index(2490)

Title: Locus:1.1.1.1679.11

Data file 2011-11-10 - TFD - EP 4-4.mgf

Click mouse within plot area to zoom in by factor of two about that point

Or, Plot from  to  Da

Label all possible matches  Label matches used for scoring

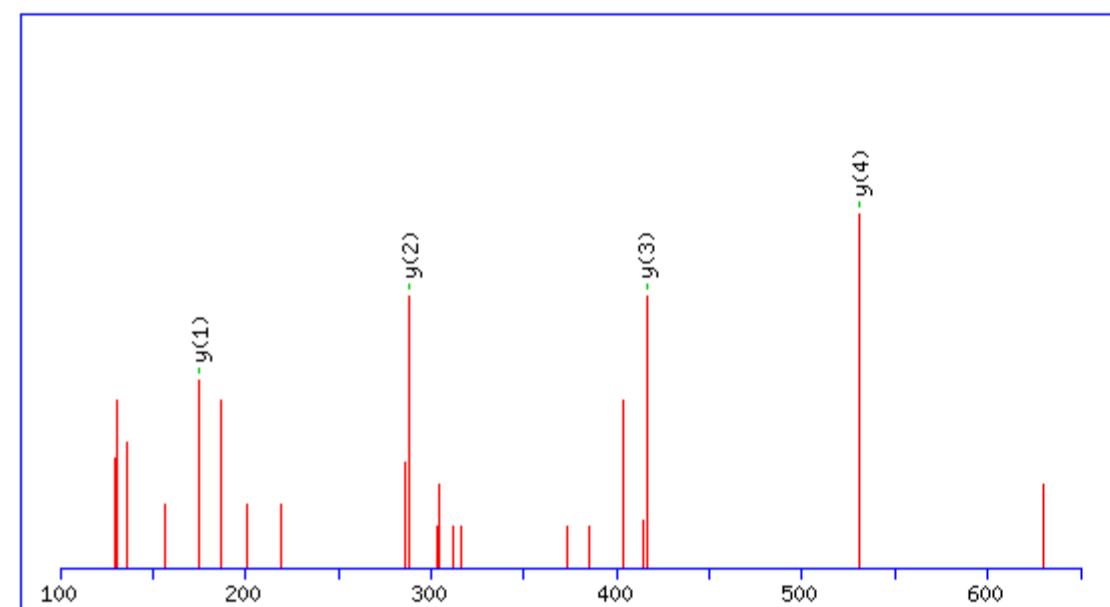

Monoisotopic mass of neutral peptide Mr(calc): 847.422180

Fixed modifications: Propionamide (C) (apply to specified residues or termini only)

Variable modifications:

M2 : Oxidation (M), with neutral losses 0.000000 (shown in table), 63.998285

Ions Score: 34 Expect: 0.0044

Matches : 4/78 fragment ions using 5 most intense peaks ([help](#))

| # | b          | b <sup>++</sup> | b <sup>*</sup> | b <sup>*++</sup> | b <sup>0</sup> | b <sup>0++</sup> | Seq. | y                 | y <sup>++</sup> | y <sup>*</sup> | y <sup>*++</sup> | y <sup>0</sup> | y <sup>0++</sup> | # |
|---|------------|-----------------|----------------|------------------|----------------|------------------|------|-------------------|-----------------|----------------|------------------|----------------|------------------|---|
| 1 | 100.075690 | 50.541483       |                |                  |                |                  | V    |                   |                 |                |                  |                |                  | 7 |
| 2 | 247.111090 | 124.059183      |                |                  |                |                  | M    | 749.361051        | 375.184164      | 732.334502     | 366.670889       | 731.350486     | 366.178881       | 6 |
| 3 | 318.148204 | 159.577740      |                |                  |                |                  | A    | 602.325651        | 301.666464      | 585.299102     | 293.153189       | 584.315086     | 292.661181       | 5 |
| 4 | 433.175147 | 217.091212      |                |                  | 415.164582     | 208.085929       | D    | <b>531.288537</b> | 266.147907      | 514.261988     | 257.634632       | 513.277972     | 257.142624       | 4 |
| 5 | 561.233725 | 281.120501      | 544.207176     | 272.607226       | 543.223160     | 272.115218       | Q    | <b>416.261594</b> | 208.634435      | 399.235045     | 200.121161       |                |                  | 3 |
| 6 | 674.317789 | 337.662533      | 657.291240     | 329.149258       | 656.307224     | 328.657250       | L    | <b>288.203016</b> | 144.605146      | 271.176467     | 136.091872       |                |                  | 2 |
| 7 |            |                 |                |                  |                |                  | R    | <b>175.118952</b> | 88.063114       | 158.092403     | 79.549840        |                |                  | 1 |

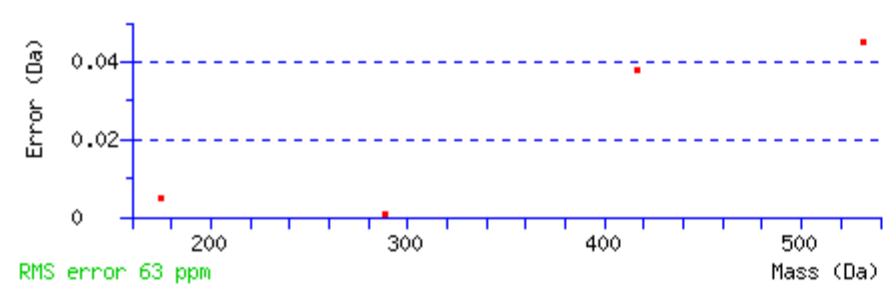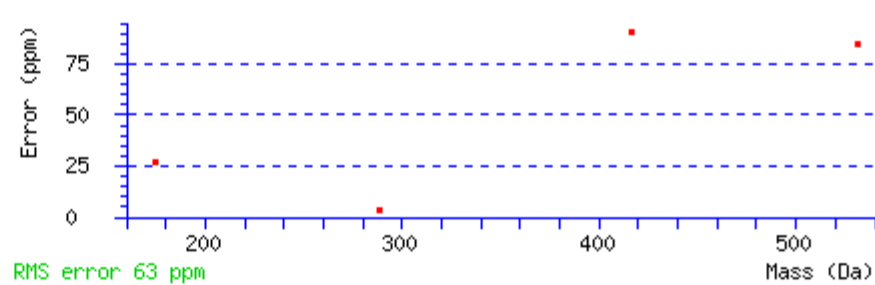

NCBI BLAST search of **VMADQLR**

(Parameters: blastp, nr protein database, expect=20000, no filter, PAM30)

Other BLAST [web gateways](#)

All matches to this query

| Score | Mr(calc):  | Delta     | Sequence                 |
|-------|------------|-----------|--------------------------|
| 34.0  | 847.422180 | -0.001132 | <a href="#">VMADQLR</a>  |
| 21.4  | 847.422165 | -0.001117 | <a href="#">MAAASPLR</a> |
| 17.9  | 847.422165 | -0.001117 | <a href="#">MADDLKR</a>  |
| 16.2  | 847.422180 | -0.001132 | <a href="#">MATPPKR</a>  |
| 14.9  | 847.422165 | -0.001117 | <a href="#">CIDASLR</a>  |
| 14.9  | 847.422165 | -0.001117 | <a href="#">LACSDIR</a>  |
| 12.5  | 847.422180 | -0.001132 | <a href="#">DGKPMLR</a>  |
| 12.5  | 847.418808 | 0.002240  | <a href="#">ENGPFLR</a>  |
| 12.3  | 847.422165 | -0.001117 | <a href="#">ALSCVER</a>  |
| 12.3  | 847.422165 | -0.001117 | <a href="#">LNSMVER</a>  |

# MASCOT Search Results

## Peptide View

MS/MS Fragmentation of **GGQLQEQLTQQLSQALSSAVAGR**

Found in **EDC4\_HUMAN**, Enhancer of mRNA-decapping protein 4 OS=Homo sapiens GN=EDC4 PE=1 SV=1

Match to Query 49278: 2369.217582 from(790.746470,3+) rtinseconds(4292) index(64468)

Title: Locus:1.1.1.3020.33

Data file 2011-11-14 - TFD - EP 8-1.mgf

Click mouse within plot area to zoom in by factor of two about that point

Or, Plot from  to  Da

Label all possible matches  Label matches used for scoring

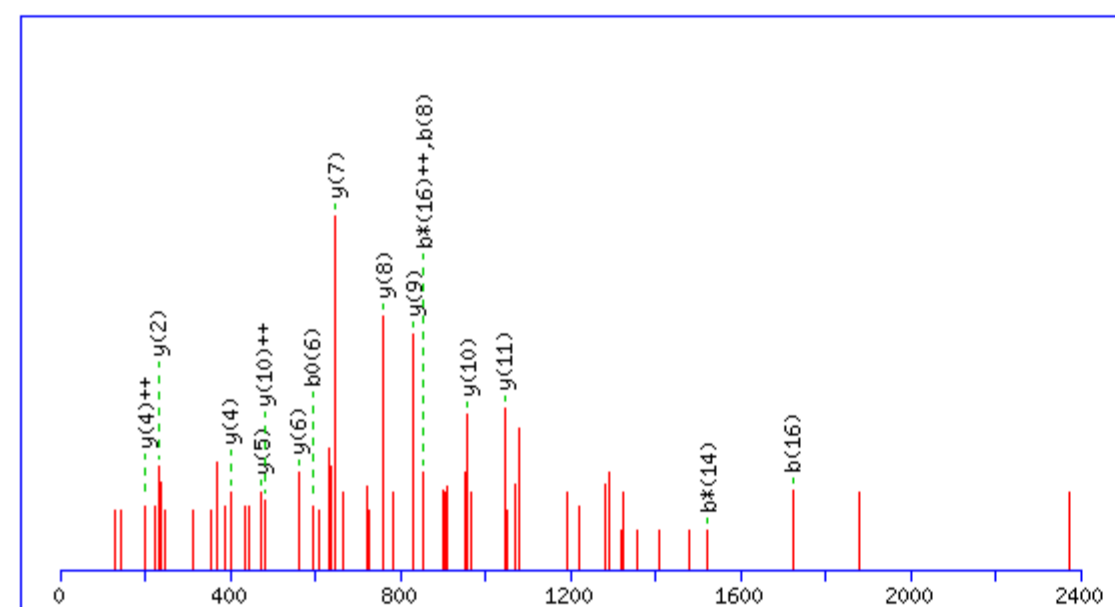

Monoisotopic mass of neutral peptide Mr(calc): 2369.229889

Fixed modifications: Propionamide (C) (apply to specified residues or termini only)

Ions Score: 42 Expect: 0.00012

Matches : 16/240 fragment ions using 31 most intense peaks [\(help\)](#)

| #  | b           | b <sup>++</sup> | b <sup>*</sup> | b <sup>+++</sup> | b <sup>0</sup> | b <sup>0++</sup> | Seq. | y           | y <sup>++</sup> | y <sup>*</sup> | y <sup>+++</sup> | y <sup>0</sup> | y <sup>0++</sup> | #  |
|----|-------------|-----------------|----------------|------------------|----------------|------------------|------|-------------|-----------------|----------------|------------------|----------------|------------------|----|
| 1  | 58.028740   | 29.518008       |                |                  |                |                  | G    |             |                 |                |                  |                |                  | 23 |
| 2  | 115.050204  | 58.028740       |                |                  |                |                  | G    | 2313.215716 | 1157.111496     | 2296.189167    | 1148.598221      | 2295.205151    | 1148.106213      | 22 |
| 3  | 243.108782  | 122.058029      | 226.082233     | 113.544755       |                |                  | Q    | 2256.194252 | 1128.600764     | 2239.167703    | 1120.087489      | 2238.183687    | 1119.595481      | 21 |
| 4  | 356.192846  | 178.600061      | 339.166297     | 170.086787       |                |                  | L    | 2128.135674 | 1064.571475     | 2111.109125    | 1056.058200      | 2110.125109    | 1055.566192      | 20 |
| 5  | 484.251424  | 242.629350      | 467.224875     | 234.116076       |                |                  | Q    | 2015.051610 | 1008.029443     | 1998.025061    | 999.516169       | 1997.041045    | 999.024161       | 19 |
| 6  | 613.294017  | 307.150647      | 596.267468     | 298.637372       | 595.283452     | 298.145364       | E    | 1886.993032 | 944.000154      | 1869.966483    | 935.486880       | 1868.982467    | 934.994872       | 18 |
| 7  | 741.352595  | 371.179936      | 724.326046     | 362.666661       | 723.342030     | 362.174653       | Q    | 1757.950439 | 879.478858      | 1740.923890    | 870.965583       | 1739.939874    | 870.473575       | 17 |
| 8  | 854.436659  | 427.721968      | 837.410110     | 419.208693       | 836.426094     | 418.716685       | L    | 1629.891861 | 815.449569      | 1612.865312    | 806.936294       | 1611.881296    | 806.444286       | 16 |
| 9  | 955.484338  | 478.245807      | 938.457789     | 469.732533       | 937.473773     | 469.240525       | T    | 1516.807797 | 758.907537      | 1499.781248    | 750.394262       | 1498.797232    | 749.902254       | 15 |
| 10 | 1083.542916 | 542.275096      | 1066.516367    | 533.761822       | 1065.532351    | 533.269814       | Q    | 1415.760118 | 708.383697      | 1398.733569    | 699.870423       | 1397.749553    | 699.378415       | 14 |
| 11 | 1211.601494 | 606.304385      | 1194.574945    | 597.791111       | 1193.590929    | 597.299103       | Q    | 1287.701540 | 644.354408      | 1270.674991    | 635.841134       | 1269.690975    | 635.349126       | 13 |
| 12 | 1324.685558 | 662.846417      | 1307.659009    | 654.333143       | 1306.674993    | 653.841135       | L    | 1159.642962 | 580.325119      | 1142.616413    | 571.811845       | 1141.632397    | 571.319837       | 12 |
| 13 | 1411.717586 | 706.362431      | 1394.691037    | 697.849157       | 1393.707021    | 697.357149       | S    | 1046.558898 | 523.783087      | 1029.532349    | 515.269813       | 1028.548333    | 514.777805       | 11 |
| 14 | 1539.776164 | 770.391720      | 1522.749615    | 761.878446       | 1521.765599    | 761.386438       | Q    | 959.526870  | 480.267073      | 942.500321     | 471.753799       | 941.516305     | 471.261791       | 10 |
| 15 | 1610.813278 | 805.910277      | 1593.786729    | 797.397003       | 1592.802713    | 796.904995       | A    | 831.468292  | 416.237784      | 814.441743     | 407.724510       | 813.457727     | 407.232502       | 9  |
| 16 | 1723.897342 | 862.452309      | 1706.870793    | 853.939035       | 1705.886777    | 853.447026       | L    | 760.431178  | 380.719227      | 743.404629     | 372.205953       | 742.420613     | 371.713945       | 8  |
| 17 | 1810.929370 | 905.968323      | 1793.902821    | 897.455049       | 1792.918805    | 896.963041       | S    | 647.347114  | 324.177195      | 630.320565     | 315.663921       | 629.336549     | 315.171913       | 7  |
| 18 | 1897.961398 | 949.484337      | 1880.934849    | 940.971063       | 1879.950833    | 940.479055       | S    | 560.315086  | 280.661181      | 543.288537     | 272.147907       | 542.304521     | 271.655899       | 6  |
| 19 | 1968.998512 | 985.002894      | 1951.971963    | 976.489620       | 1950.987947    | 975.997612       | A    | 473.283058  | 237.145167      | 456.256509     | 228.631893       |                |                  | 5  |
| 20 | 2068.066926 | 1034.537101     | 2051.040377    | 1026.023826      | 2050.056361    | 1025.531818      | V    | 402.245944  | 201.626610      | 385.219395     | 193.113336       |                |                  | 4  |
| 21 | 2139.104040 | 1070.055658     | 2122.077491    | 1061.542383      | 2121.093475    | 1061.050376      | A    | 303.177530  | 152.092403      | 286.150981     | 143.579129       |                |                  | 3  |
| 22 | 2196.125504 | 1098.566390     | 2179.098955    | 1090.053115      | 2178.114939    | 1089.561107      | G    | 232.140416  | 116.573846      | 215.113867     | 108.060571       |                |                  | 2  |
| 23 |             |                 |                |                  |                |                  | R    | 175.118952  | 88.063114       | 158.092403     | 79.549839        |                |                  | 1  |

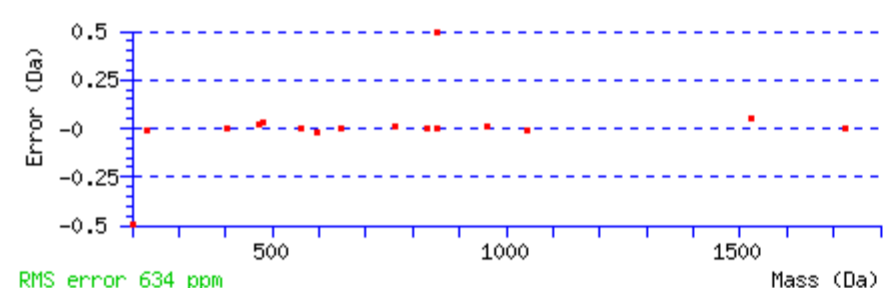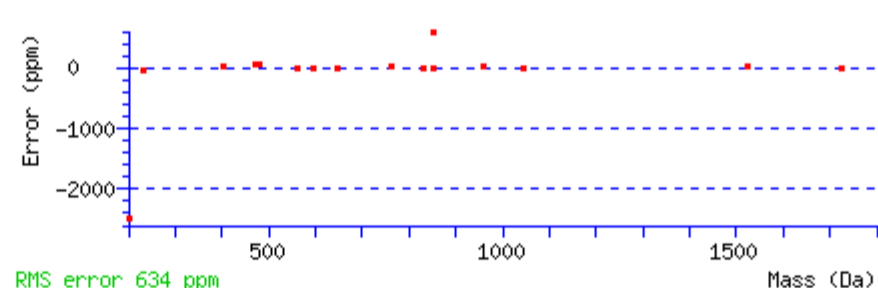

NCBI BLAST search of [GGQLQEQLTQQLSQALSSAVAGR](#)

(Parameters: blastp, nr protein database, expect=20000, no filter, PAM30)

Other BLAST [web gateways](#)

All matches to this query

| Score | Mr(calc):   | Delta     | Sequence                                |
|-------|-------------|-----------|-----------------------------------------|
| 42.1  | 2369.229889 | -0.012307 | <a href="#">GGQLQEQLTQQLSQALSSAVAGR</a> |
| 0.1   | 2369.217484 | 0.000098  | <a href="#">MAGQPWLAWGTAAARVSARPTR</a>  |

# MASCOT SCIENCE Mascot Search Results

## Peptide View

### MS/MS Fragmentation of LIETGER

Found in **ENY2\_HUMAN**, Enhancer of yellow 2 transcription factor homolog OS=Homo sapiens GN=ENY2 PE=1 SV=1

Match to Query 865: 816.437128 from(409.225840,2+) rtinseconds(982) index(352)

Title: Locus:1.1.1.2007.3

Data file 2011-11-12 - TFD - EP 5-8.mgf

Click mouse within plot area to zoom in by factor of two about that point

Or, Plot from  to  Da

Label all possible matches  Label matches used for scoring

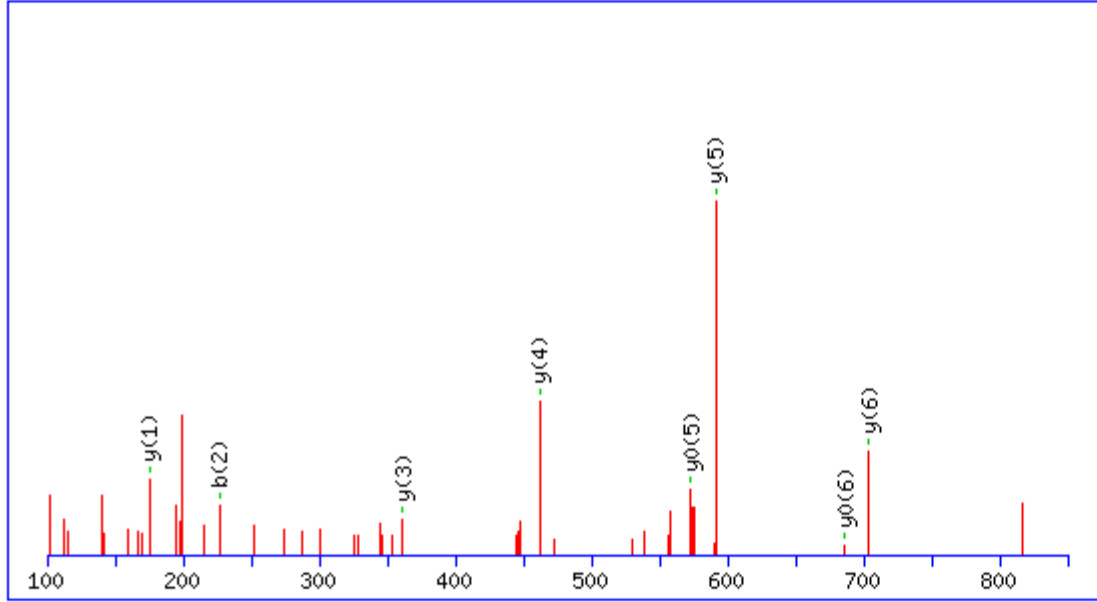

Monoisotopic mass of neutral peptide Mr(calc): 816.434113

Fixed modifications: Propionamide (C) (apply to specified residues or termini only)

Ions Score: 36 Expect: 0.0035

Matches : 8/54 fragment ions using 12 most intense peaks [\(help\)](#)

| # | b                 | b <sup>++</sup> | b <sup>0</sup> | b <sup>0++</sup> | Seq. | y                 | y <sup>++</sup> | y <sup>*</sup> | y <sup>*++</sup> | y <sup>0</sup>    | y <sup>0++</sup> | # |
|---|-------------------|-----------------|----------------|------------------|------|-------------------|-----------------|----------------|------------------|-------------------|------------------|---|
| 1 | 114.091340        | 57.549308       |                |                  | L    |                   |                 |                |                  |                   |                  | 7 |
| 2 | <b>227.175404</b> | 114.091340      |                |                  | I    | <b>704.357345</b> | 352.682311      | 687.330796     | 344.169036       | <b>686.346780</b> | 343.677028       | 6 |
| 3 | 356.217997        | 178.612637      | 338.207432     | 169.607354       | E    | <b>591.273281</b> | 296.140279      | 574.246732     | 287.627004       | <b>573.262716</b> | 287.134996       | 5 |
| 4 | 457.265676        | 229.136476      | 439.255111     | 220.131194       | T    | <b>462.230688</b> | 231.618982      | 445.204139     | 223.105708       | 444.220123        | 222.613700       | 4 |
| 5 | 514.287140        | 257.647208      | 496.276575     | 248.641926       | G    | <b>361.183009</b> | 181.095143      | 344.156460     | 172.581868       | 343.172444        | 172.089860       | 3 |
| 6 | 643.329733        | 322.168505      | 625.319168     | 313.163222       | E    | 304.161545        | 152.584411      | 287.134996     | 144.071136       | 286.150980        | 143.579128       | 2 |
| 7 |                   |                 |                |                  | R    | <b>175.118952</b> | 88.063114       | 158.092403     | 79.549840        |                   |                  | 1 |

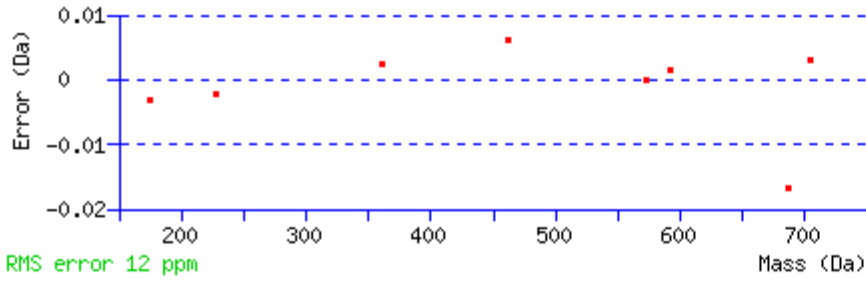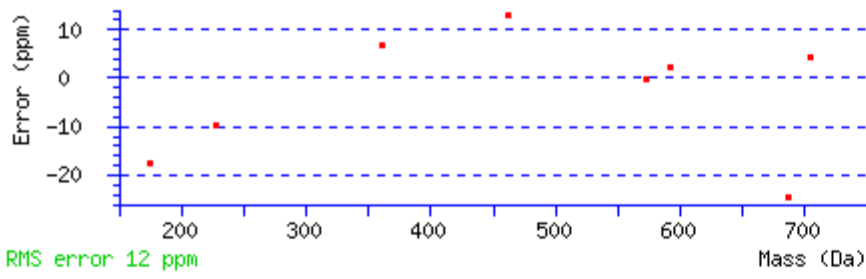

### NCBI BLAST search of LIETGER

(Parameters: blastp, nr protein database, expect=20000, no filter, PAM30)

Other BLAST [web gateways](#)

### All matches to this query

| Score | Mr(calc):  | Delta     | Sequence                 |
|-------|------------|-----------|--------------------------|
| 35.7  | 816.434113 | 0.003015  | <a href="#">LIETGER</a>  |
| 13.4  | 816.434128 | 0.003000  | <a href="#">IPLDTSR</a>  |
| 11.6  | 816.434113 | 0.003015  | <a href="#">IPSSSELR</a> |
| 11.6  | 816.434097 | 0.003031  | <a href="#">LLAEESR</a>  |
| 11.6  | 816.434097 | 0.003031  | <a href="#">LLSAEER</a>  |
| 7.7   | 816.438812 | -0.001684 | <a href="#">LNQMRR</a>   |
| 5.5   | 816.434113 | 0.003015  | <a href="#">IIQDSNK</a>  |
| 5.4   | 816.434113 | 0.003015  | <a href="#">ELEATVR</a>  |
| 5.2   | 816.434128 | 0.003000  | <a href="#">IDEVVSRL</a> |
| 4.5   | 816.434097 | 0.003031  | <a href="#">LEKDNAK</a>  |

# MASCOT Search Results

## Peptide View

MS/MS Fragmentation of **VIELENWTEGK**

Found in **ECHD1\_HUMAN**, Enoyl-CoA hydratase domain-containing protein 1 OS=Homo sapiens GN=ECHDC1 PE=1 SV=2

Match to Query 35447: 1316.659248 from(659.336900,2+) rtinseconds(2791) index(33417)

Title: Locus:1.1.1.2647.29

Data file 2011-11-12 - TFD - EP 5-5.mgf

Click mouse within plot area to zoom in by factor of two about that point

Or, Plot from  to  Da

Label all possible matches  Label matches used for scoring

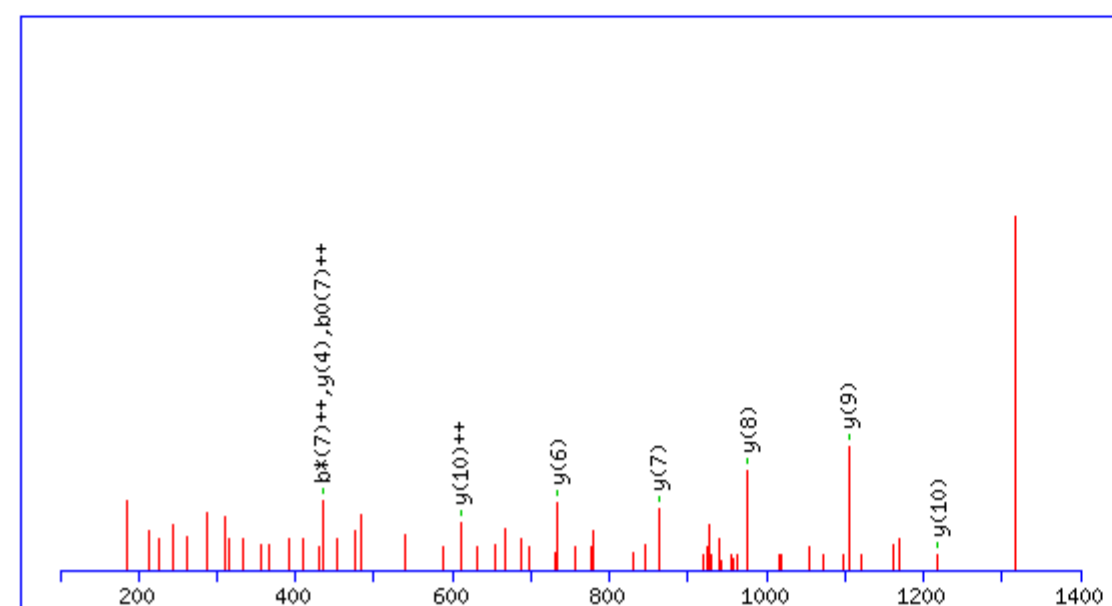

Monoisotopic mass of neutral peptide Mr(calc): 1316.661209

Fixed modifications: Propionamide (C) (apply to specified residues or termini only)

Ions Score: 37 Expect: 0.0007

Matches : 9/102 fragment ions using 11 most intense peaks ([help](#))

| #  | b           | b <sup>++</sup> | b <sup>*</sup> | b <sup>*++</sup> | b <sup>0</sup> | b <sup>0++</sup> | Seq. | y           | y <sup>++</sup> | y <sup>*</sup> | y <sup>*++</sup> | y <sup>0</sup> | y <sup>0++</sup> | #  |
|----|-------------|-----------------|----------------|------------------|----------------|------------------|------|-------------|-----------------|----------------|------------------|----------------|------------------|----|
| 1  | 100.075690  | 50.541483       |                |                  |                |                  | V    |             |                 |                |                  |                |                  | 11 |
| 2  | 213.159754  | 107.083515      |                |                  |                |                  | I    | 1218.600094 | 609.803685      | 1201.573545    | 601.290411       | 1200.589529    | 600.798402       | 10 |
| 3  | 342.202347  | 171.604811      |                |                  | 324.191782     | 162.599529       | E    | 1105.516030 | 553.261653      | 1088.489481    | 544.748379       | 1087.505465    | 544.256371       | 9  |
| 4  | 455.286411  | 228.146843      |                |                  | 437.275846     | 219.141561       | L    | 976.473437  | 488.740357      | 959.446888     | 480.227082       | 958.462872     | 479.735074       | 8  |
| 5  | 584.329004  | 292.668140      |                |                  | 566.318439     | 283.662858       | E    | 863.389373  | 432.198325      | 846.362824     | 423.685050       | 845.378808     | 423.193042       | 7  |
| 6  | 698.371931  | 349.689604      | 681.345382     | 341.176329       | 680.361366     | 340.684321       | N    | 734.346780  | 367.677028      | 717.320231     | 359.163753       | 716.336215     | 358.671745       | 6  |
| 7  | 884.451244  | 442.729260      | 867.424695     | 434.215986       | 866.440679     | 433.723978       | W    | 620.303853  | 310.655565      | 603.277304     | 302.142290       | 602.293288     | 301.650282       | 5  |
| 8  | 985.498923  | 493.253100      | 968.472374     | 484.739825       | 967.488358     | 484.247817       | T    | 434.224540  | 217.615908      | 417.197991     | 209.102633       | 416.213975     | 208.610625       | 4  |
| 9  | 1114.541516 | 557.774396      | 1097.514967    | 549.261122       | 1096.530951    | 548.769114       | E    | 333.176861  | 167.092068      | 316.150312     | 158.578794       | 315.166296     | 158.086786       | 3  |
| 10 | 1171.562980 | 586.285128      | 1154.536431    | 577.771854       | 1153.552415    | 577.279845       | G    | 204.134268  | 102.570772      | 187.107719     | 94.057497        |                |                  | 2  |
| 11 |             |                 |                |                  |                |                  | K    | 147.112804  | 74.060040       | 130.086255     | 65.546765        |                |                  | 1  |

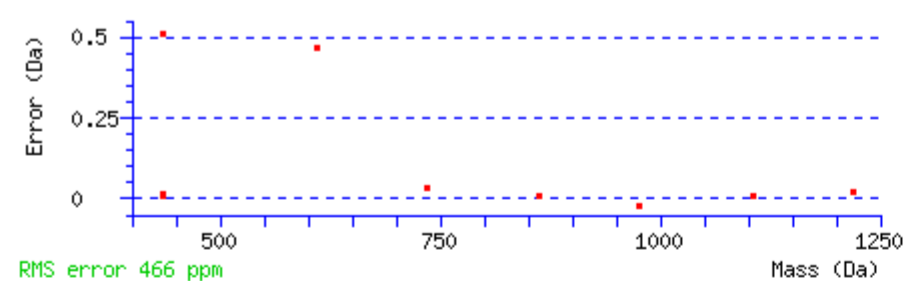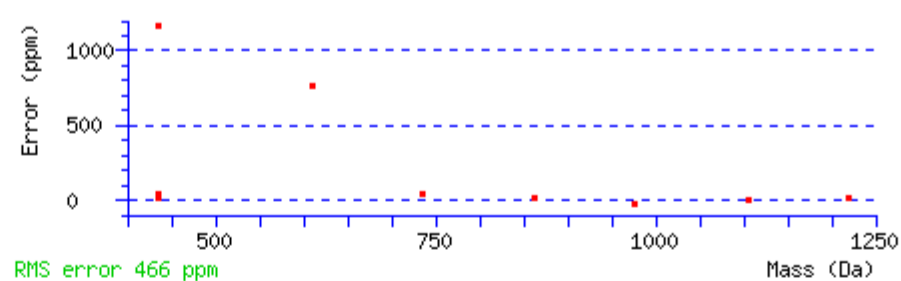

NCBI BLAST search of **VIELENWTEGK**

(Parameters: blastp, nr protein database, expect=20000, no filter, PAM30)

Other BLAST [web gateways](#)

All matches to this query

| Score | Mr(calc):   | Delta     | Sequence                     |
|-------|-------------|-----------|------------------------------|
| 37.3  | 1316.661209 | -0.001961 | <a href="#">VIELENWTEGK</a>  |
| 3.4   | 1316.647324 | 0.011924  | <a href="#">VPFNSQGSNPVR</a> |
| 0.9   | 1316.665924 | -0.006676 | <a href="#">VLERWSTCPR</a>   |
| 0.4   | 1316.657196 | 0.002052  | <a href="#">VPDNSLLEATSR</a> |

Mascot: <http://www.matrixscience.com/>

# MASCOT SCIENCE Mascot Search Results

## Peptide View

MS/MS Fragmentation of **GVPVPFPIPEPDGCK**

Found in **NPC2\_HUMAN**, Epididymal secretory protein E1 OS=Homo sapiens GN=NPC2 PE=1 SV=1

Match to Query 49266: 1607.787908 from(804.901230,2+) rtinseconds(3075) index(42945)

Title: Locus:1.1.1.1548.36

Data file 2012-01-27 - TFD - Epitel - IEC - 10ul - 2.mgf

Click mouse within plot area to zoom in by factor of two about that point

Or, Plot from  to  Da

Label all possible matches  Label matches used for scoring

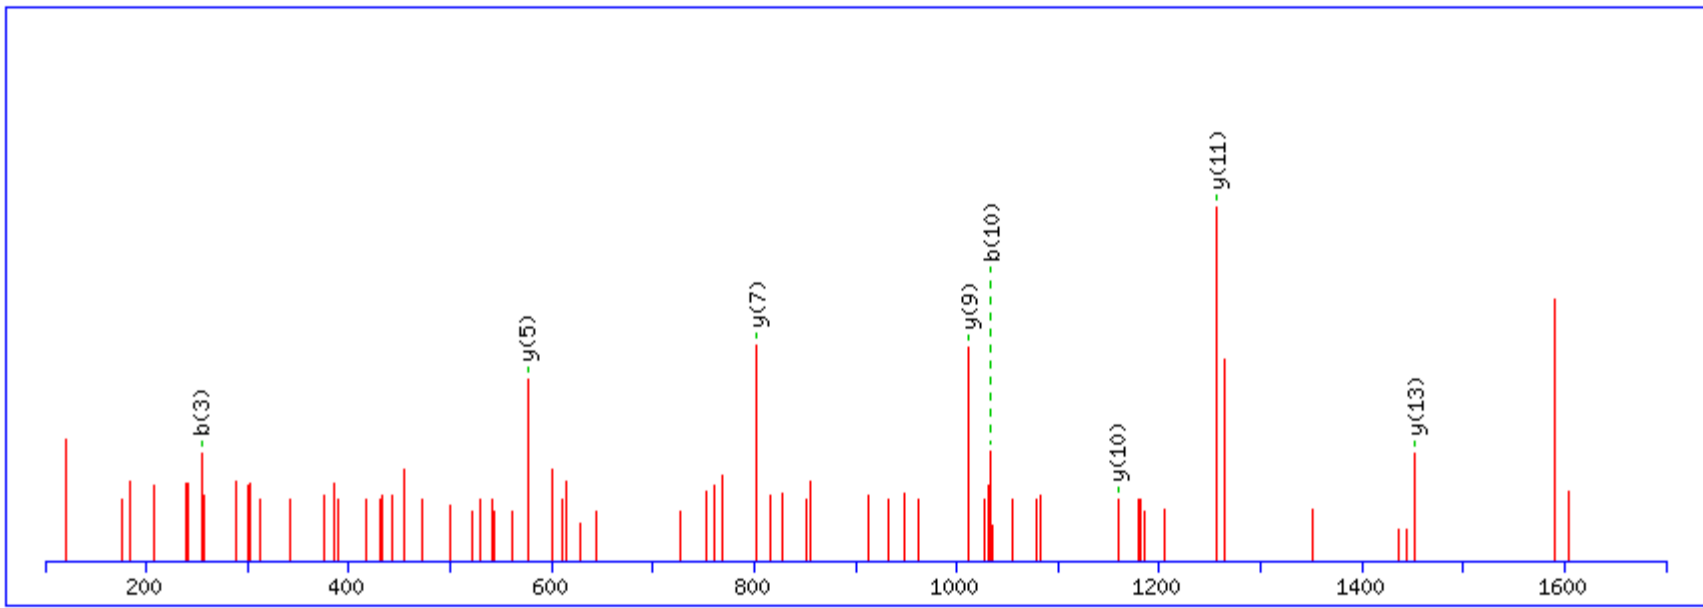

Monoisotopic mass of neutral peptide Mr(calc): 1607.801788

Fixed modifications: Carbamidomethyl (C) (apply to specified residues or termini only)

Ions Score: 34 Expect: 0.0056

Matches : 8/116 fragment ions using 15 most intense peaks [\(help\)](#)

| #  | b                  | b <sup>++</sup> | b <sup>0</sup> | b <sup>0++</sup> | Seq.     | y                  | y <sup>++</sup> | y*          | y <sup>*++</sup> | y <sup>0</sup> | y <sup>0++</sup> | #  |
|----|--------------------|-----------------|----------------|------------------|----------|--------------------|-----------------|-------------|------------------|----------------|------------------|----|
| 1  | 58.028740          | 29.518008       |                |                  | <b>G</b> |                    |                 |             |                  |                |                  | 15 |
| 2  | 157.097154         | 79.052215       |                |                  | <b>V</b> | 1551.787579        | 776.397428      | 1534.761030 | 767.884153       | 1533.777014    | 767.392145       | 14 |
| 3  | <b>254.149918</b>  | 127.578597      |                |                  | <b>P</b> | <b>1452.719165</b> | 726.863221      | 1435.692616 | 718.349946       | 1434.708600    | 717.857938       | 13 |
| 4  | 353.218332         | 177.112804      |                |                  | <b>V</b> | 1355.666401        | 678.336839      | 1338.639852 | 669.823564       | 1337.655836    | 669.331556       | 12 |
| 5  | 450.271096         | 225.639186      |                |                  | <b>P</b> | <b>1256.597987</b> | 628.802632      | 1239.571438 | 620.289357       | 1238.587422    | 619.797349       | 11 |
| 6  | 597.339510         | 299.173393      |                |                  | <b>F</b> | <b>1159.545223</b> | 580.276250      | 1142.518674 | 571.762975       | 1141.534658    | 571.270967       | 10 |
| 7  | 694.392274         | 347.699775      |                |                  | <b>P</b> | <b>1012.476809</b> | 506.742043      | 995.450260  | 498.228768       | 994.466244     | 497.736760       | 9  |
| 8  | 807.476338         | 404.241807      |                |                  | <b>I</b> | 915.424045         | 458.215661      | 898.397496  | 449.702386       | 897.413480     | 449.210378       | 8  |
| 9  | 904.529102         | 452.768189      |                |                  | <b>P</b> | <b>802.339981</b>  | 401.673629      | 785.313432  | 393.160354       | 784.329416     | 392.668346       | 7  |
| 10 | <b>1033.571695</b> | 517.289486      | 1015.561130    | 508.284203       | <b>E</b> | 705.287217         | 353.147247      | 688.260668  | 344.633972       | 687.276652     | 344.141964       | 6  |
| 11 | 1130.624459        | 565.815868      | 1112.613894    | 556.810585       | <b>P</b> | <b>576.244624</b>  | 288.625950      | 559.218075  | 280.112676       | 558.234059     | 279.620668       | 5  |
| 12 | 1245.651402        | 623.329339      | 1227.640837    | 614.324057       | <b>D</b> | 479.191860         | 240.099568      | 462.165311  | 231.586294       | 461.181295     | 231.094286       | 4  |
| 13 | 1302.672866        | 651.840071      | 1284.662301    | 642.834789       | <b>G</b> | 364.164917         | 182.586096      | 347.138368  | 174.072822       |                |                  | 3  |
| 14 | 1462.703515        | 731.855396      | 1444.692950    | 722.850113       | <b>C</b> | 307.143453         | 154.075365      | 290.116904  | 145.562090       |                |                  | 2  |
| 15 |                    |                 |                |                  | <b>K</b> | 147.112804         | 74.060040       | 130.086255  | 65.546765        |                |                  | 1  |

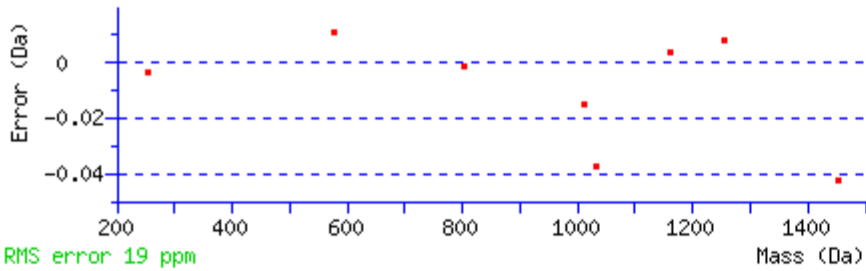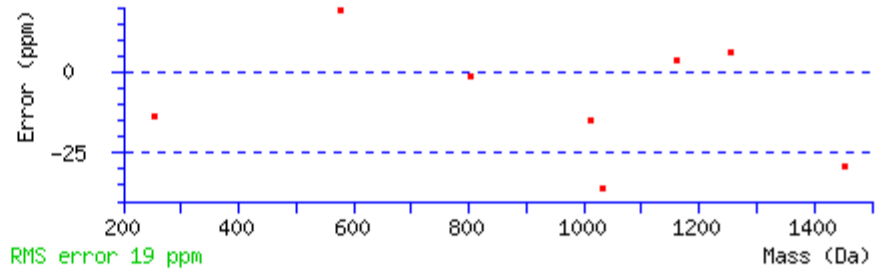

NCBI BLAST search of [GVPVPFPIPEPDGCK](#)

(Parameters: blastp, nr protein database, expect=20000, no filter, PAM30)

Other BLAST [web gateways](#)

## All matches to this query

| Score | Mr(calc):   | Delta     | Sequence                        |
|-------|-------------|-----------|---------------------------------|
| 34.4  | 1607.801788 | -0.013880 | <a href="#">GVPVPFPIPEPDGCK</a> |

Mascot: <http://www.matrixscience.com/>

# MASCOT SCIENCE Mascot Search Results

## Peptide View

MS/MS Fragmentation of **IAASIYTDR**

Found in **EMP2\_HUMAN**, Epithelial membrane protein 2 OS=Homo sapiens GN=EMP2 PE=2 SV=1

Match to Query 273180: 1008.525008 from(505.269780,2+) rtinseconds(1678) index(588922)

Title: Locus:1.1.1.960.21

Data file C:\Program Files (x86)\Matrix Science\Mascot Daemon\mgf3 TFD - Epitel - R2\mascot\_daemon\_merge.mgf

Click mouse within plot area to zoom in by factor of two about that point

Or, Plot from  to  Da

Label all possible matches  Label matches used for scoring

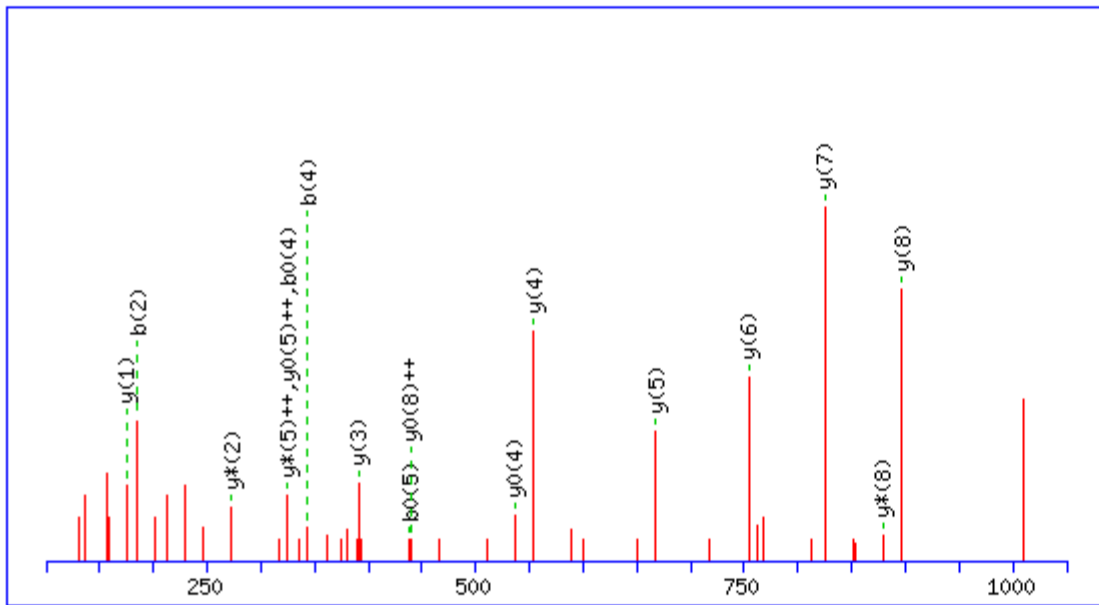

Monoisotopic mass of neutral peptide  $M_r(\text{calc})$ : 1008.523987

Fixed modifications: Carbamidomethyl (C) (apply to specified residues or termini only)

Ions Score: 52 Expect: 4.7e-005

Matches : 17/72 fragment ions using 24 most intense peaks [\(help\)](#)

| # | b                 | b <sup>++</sup> | b <sup>0</sup>    | b <sup>0++</sup> | Seq. | y                 | y <sup>++</sup> | y <sup>*</sup>    | y <sup>+++</sup>  | y <sup>0</sup>    | y <sup>0++</sup>  | # |
|---|-------------------|-----------------|-------------------|------------------|------|-------------------|-----------------|-------------------|-------------------|-------------------|-------------------|---|
| 1 | 114.091340        | 57.549308       |                   |                  | I    |                   |                 |                   |                   |                   |                   | 9 |
| 2 | <b>185.128454</b> | 93.067865       |                   |                  | A    | <b>896.447223</b> | 448.727250      | <b>879.420674</b> | 440.213975        | 878.436658        | <b>439.721967</b> | 8 |
| 3 | 256.165568        | 128.586422      |                   |                  | A    | <b>825.410109</b> | 413.208693      | 808.383560        | 404.695418        | 807.399544        | 404.203410        | 7 |
| 4 | <b>343.197596</b> | 172.102436      | <b>325.187031</b> | 163.097153       | S    | <b>754.372995</b> | 377.690136      | 737.346446        | 369.176861        | 736.362430        | 368.684853        | 6 |
| 5 | 456.281660        | 228.644468      | <b>438.271095</b> | 219.639186       | I    | <b>667.340967</b> | 334.174122      | 650.314418        | <b>325.660847</b> | 649.330402        | <b>325.168839</b> | 5 |
| 6 | 619.344989        | 310.176133      | 601.334424        | 301.170850       | Y    | <b>554.256903</b> | 277.632090      | 537.230354        | 269.118815        | <b>536.246338</b> | 268.626807        | 4 |
| 7 | 720.392668        | 360.699972      | 702.382103        | 351.694690       | T    | <b>391.193574</b> | 196.100425      | 374.167025        | 187.587150        | 373.183009        | 187.095142        | 3 |
| 8 | 835.419611        | 418.213444      | 817.409046        | 409.208161       | D    | 290.145895        | 145.576585      | <b>273.119346</b> | 137.063311        | 272.135330        | 136.571303        | 2 |
| 9 |                   |                 |                   |                  | R    | <b>175.118952</b> | 88.063114       | 158.092403        | 79.549839         |                   |                   | 1 |

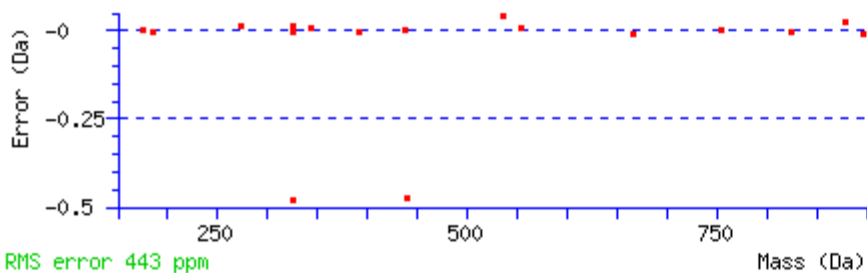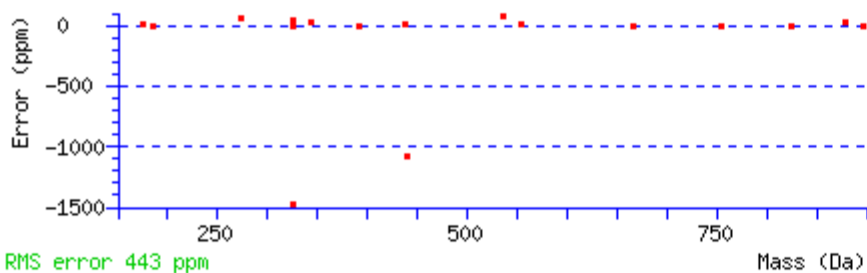

NCBI BLAST search of [IAASIYTDR](#)

(Parameters: blastp, nr protein database, expect=20000, no filter, PAM30)

Other BLAST [web gateways](#)

## All matches to this query

| Score | $M_r(\text{calc})$ : | Delta     | Sequence                   |
|-------|----------------------|-----------|----------------------------|
| 52.2  | 1008.523987          | 0.001021  | <a href="#">IAASIYTDR</a>  |
| 13.7  | 1008.523987          | 0.001021  | <a href="#">LATEEPPPR</a>  |
| 8.2   | 1008.531403          | -0.006395 | <a href="#">LAAAVGFLTM</a> |
| 6.3   | 1008.521500          | 0.003508  | <a href="#">LPPPPMWR</a>   |
| 5.4   | 1008.521500          | 0.003508  | <a href="#">LPPPPMWR</a>   |
| 4.8   | 1008.521500          | 0.003508  | <a href="#">LPPPPMWR</a>   |
| 3.5   | 1008.523987          | 0.001021  | <a href="#">IKFTEESR</a>   |
| 2.9   | 1008.531387          | -0.006379 | <a href="#">LAFGSLIASM</a> |
| 1.9   | 1008.521500          | 0.003508  | <a href="#">RWIAFAVM</a>   |
| 0.6   | 1008.524017          | 0.000991  | <a href="#">TFSSIPVSR</a>  |



# MASCOT SEARCH RESULTS

## Peptide View

MS/MS Fragmentation of **LQTQGLGTALK**

Found in **ERO1A\_HUMAN**, ERO1-like protein alpha OS=Homo sapiens GN=ERO1L PE=1 SV=2

Match to Query 431673: 1128.648388 from(565.331470,2+) rtinseconds(1944) index(428729)  
 Title: Locus:1.1.1.1083.17

Data file C:\Program Files (x86)\Matrix Science\Mascot Daemon\mgf3 TFD - Epitel - R2\mascot\_daemon\_merge.mgf

Click mouse within plot area to zoom in by factor of two about that point

Or, Plot from  to  Da

Label all possible matches  Label matches used for scoring

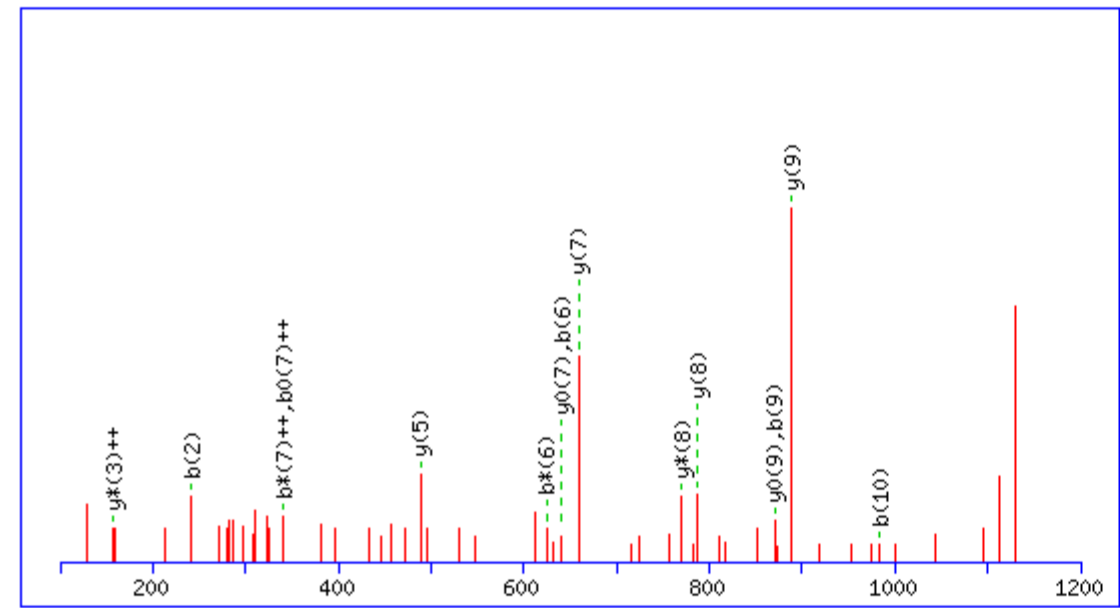

Monoisotopic mass of neutral peptide Mr(calc): 1128.650269

Fixed modifications: Carbamidomethyl (C) (apply to specified residues or termini only)

Ions Score: 31 Expect: 0.0067

Matches : 15/108 fragment ions using 20 most intense peaks [\(help\)](#)

| #  | b                 | b <sup>++</sup> | b <sup>*</sup>    | b <sup>+++</sup>  | b <sup>0</sup> | b <sup>0++</sup>  | Seq. | y                 | y <sup>++</sup> | y <sup>*</sup>    | y <sup>+++</sup>  | y <sup>0</sup>    | y <sup>0++</sup> | #  |
|----|-------------------|-----------------|-------------------|-------------------|----------------|-------------------|------|-------------------|-----------------|-------------------|-------------------|-------------------|------------------|----|
| 1  | 114.091340        | 57.549308       |                   |                   |                |                   | L    |                   |                 |                   |                   |                   |                  | 11 |
| 2  | <b>242.149918</b> | 121.578597      | 225.123369        | 113.065323        |                |                   | Q    | 1016.573488       | 508.790382      | 999.546939        | 500.277108        | 998.562923        | 499.785100       | 10 |
| 3  | 343.197597        | 172.102437      | 326.171048        | 163.589162        | 325.187032     | 163.097154        | T    | <b>888.514910</b> | 444.761093      | 871.488361        | 436.247819        | <b>870.504345</b> | 435.755811       | 9  |
| 4  | 471.256175        | 236.131726      | 454.229626        | 227.618451        | 453.245610     | 227.126443        | Q    | <b>787.467231</b> | 394.237254      | <b>770.440682</b> | 385.723979        | 769.456666        | 385.231971       | 8  |
| 5  | 528.277639        | 264.642458      | 511.251090        | 256.129183        | 510.267074     | 255.637175        | G    | <b>659.408653</b> | 330.207965      | 642.382104        | 321.694690        | <b>641.398088</b> | 321.202682       | 7  |
| 6  | <b>641.361703</b> | 321.184490      | <b>624.335154</b> | 312.671215        | 623.351138     | 312.179207        | L    | 602.387189        | 301.697233      | 585.360640        | 293.183958        | 584.376624        | 292.691950       | 6  |
| 7  | 698.383167        | 349.695222      | 681.356618        | <b>341.181947</b> | 680.372602     | <b>340.689939</b> | G    | <b>489.303125</b> | 245.155201      | 472.276576        | 236.641926        | 471.292560        | 236.149918       | 5  |
| 8  | 799.430846        | 400.219061      | 782.404297        | 391.705787        | 781.420281     | 391.213779        | T    | 432.281661        | 216.644469      | 415.255112        | 208.131194        | 414.271096        | 207.639186       | 4  |
| 9  | <b>870.467960</b> | 435.737618      | 853.441411        | 427.224344        | 852.457395     | 426.732336        | A    | 331.233982        | 166.120629      | 314.207433        | <b>157.607355</b> |                   |                  | 3  |
| 10 | <b>983.552024</b> | 492.279650      | 966.525475        | 483.766376        | 965.541459     | 483.274368        | L    | 260.196868        | 130.602072      | 243.170319        | 122.088798        |                   |                  | 2  |
| 11 |                   |                 |                   |                   |                |                   | K    | 147.112804        | 74.060040       | 130.086255        | 65.546766         |                   |                  | 1  |

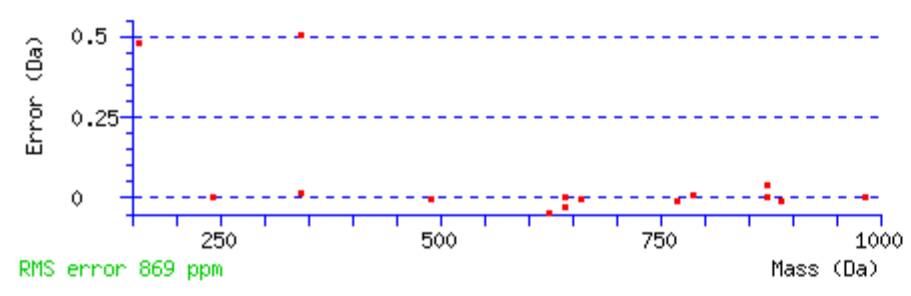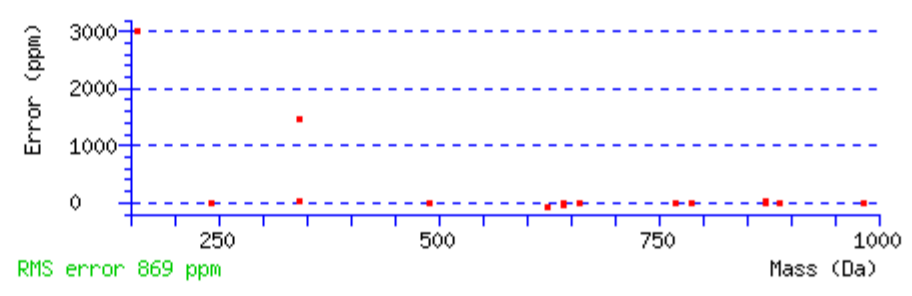

NCBI BLAST search of **LQTQGLGTALK**

(Parameters: blastp, nr protein database, expect=20000, no filter, PAM30)

Other BLAST [web gateways](#)

### All matches to this query

| Score | Mr(calc):   | Delta     | Sequence                    |
|-------|-------------|-----------|-----------------------------|
| 31.3  | 1128.650269 | -0.001881 | <a href="#">LQTQGLGTALK</a> |
| 22.6  | 1128.639008 | 0.009380  | <a href="#">QLVEASELLK</a>  |
| 9.9   | 1128.639038 | 0.009350  | <a href="#">KVPSDTLPLK</a>  |
| 9.2   | 1128.643723 | 0.004665  | <a href="#">AGLLARLCQK</a>  |
| 9.2   | 1128.654282 | -0.005894 | <a href="#">AGLSIFSPIPK</a> |
| 9.2   | 1128.650253 | -0.001865 | <a href="#">KLLSGQQEVK</a>  |
| 2.3   | 1128.639023 | 0.009365  | <a href="#">PVESLNTLLK</a>  |
| 1.7   | 1128.650238 | -0.001850 | <a href="#">QRITLEELK</a>   |
| 1.5   | 1128.639038 | 0.009350  | <a href="#">KSPVPVETLK</a>  |
| 1.1   | 1128.639008 | 0.009380  | <a href="#">KETIPLTAEK</a>  |

# **MATRIX** SCIENCE Mascot Search Results

## Peptide View

### MS/MS Fragmentation of **IPVQLQR**

Found in **STML3\_HUMAN**, Stomatin-like protein 3 OS=Homo sapiens GN=STOML3 PE=1 SV=1

Match to Query 4110: 852.521448 from(427.268000,2+) rtinseconds(1749) index(16572)

Title: Locus:1.1.1.1958.6

Data file 2011-11-12 - TFD - EP 6-5.mgf

Click mouse within plot area to zoom in by factor of two about that point

Or, Plot from  to  Da

Label all possible matches  Label matches used for scoring

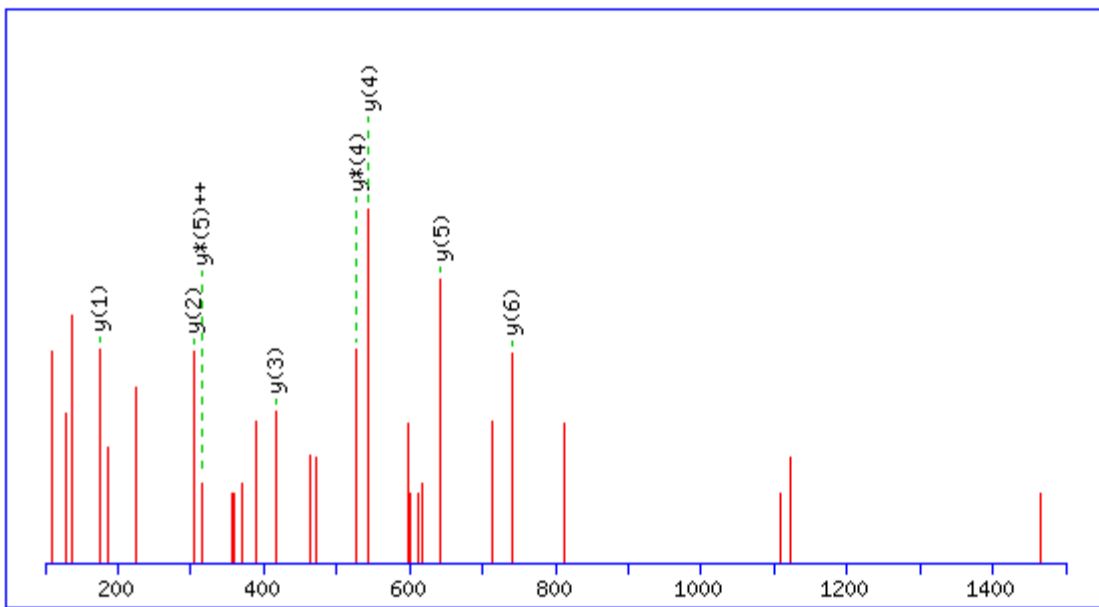

Monoisotopic mass of neutral peptide Mr(calc): 852.518127

Fixed modifications: Propionamide (C) (apply to specified residues or termini only)

Ions Score: 43 Expect: 0.00016

Matches : 8/42 fragment ions using 15 most intense peaks [\(help\)](#)

| # | b          | b <sup>++</sup> | b <sup>*</sup> | b <sup>***</sup> | Seq. | y          | y <sup>++</sup> | y <sup>*</sup> | y <sup>***</sup> | # |
|---|------------|-----------------|----------------|------------------|------|------------|-----------------|----------------|------------------|---|
| 1 | 114.091340 | 57.549308       |                |                  | I    |            |                 |                |                  | 7 |
| 2 | 211.144104 | 106.075690      |                |                  | P    | 740.441350 | 370.724313      | 723.414801     | 362.211039       | 6 |
| 3 | 310.212518 | 155.609897      |                |                  | V    | 643.388586 | 322.197931      | 626.362037     | 313.684657       | 5 |
| 4 | 438.271096 | 219.639186      | 421.244547     | 211.125912       | Q    | 544.320172 | 272.663724      | 527.293623     | 264.150450       | 4 |
| 5 | 551.355160 | 276.181218      | 534.328611     | 267.667944       | L    | 416.261594 | 208.634435      | 399.235045     | 200.121161       | 3 |
| 6 | 679.413738 | 340.210507      | 662.387189     | 331.697233       | Q    | 303.177530 | 152.092403      | 286.150981     | 143.579129       | 2 |
| 7 |            |                 |                |                  | R    | 175.118952 | 88.063114       | 158.092403     | 79.549840        | 1 |

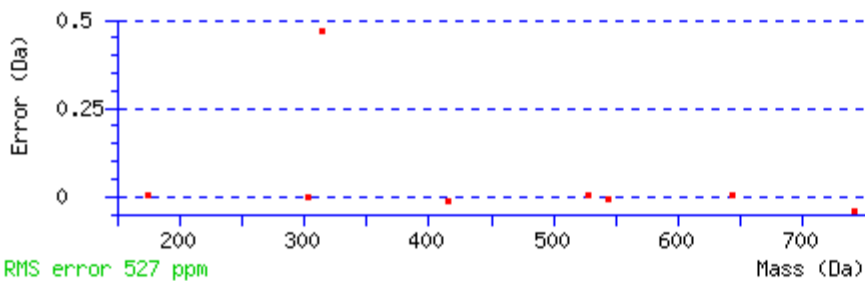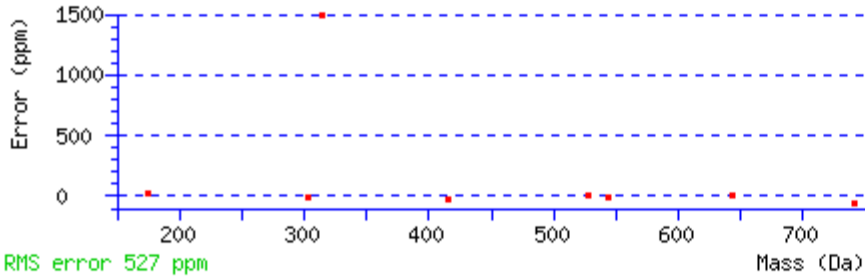

### NCBI BLAST search of **IPVQLQR**

(Parameters: blastp, nr protein database, expect=20000, no filter, PAM30)

Other BLAST [web gateways](#)

### All matches to this query

| Score | Mr(calc):  | Delta    | Sequence                 |
|-------|------------|----------|--------------------------|
| 43.4  | 852.518127 | 0.003321 | <a href="#">IPVQLQR</a>  |
| 43.4  | 852.518127 | 0.003321 | <a href="#">LPVQLQR</a>  |
| 32.4  | 852.518127 | 0.003321 | <a href="#">IPVKQPR</a>  |
| 6.9   | 852.518112 | 0.003336 | <a href="#">LPKDKPR</a>  |
| 4.5   | 852.518127 | 0.003321 | <a href="#">IPVKQPR</a>  |
| 4.0   | 852.518112 | 0.003336 | <a href="#">LLPNAIGR</a> |
| 3.5   | 852.518112 | 0.003336 | <a href="#">LNIGPAIR</a> |

# Mascot Search Results

## Peptide View

MS/MS Fragmentation of **NFLLINSLASK**

Found in **DHB2\_HUMAN**, Estradiol 17-beta-dehydrogenase 2 OS=Homo sapiens GN=HSD17B2 PE=1 SV=1

Match to Query 38126: 1331.787788 from(666.901170,2+) rtinseconds(4194) index(63974)

Title: Locus:1.1.1.2884.27

Data file 2011-11-12 - TFD - EP 6-4.mgf

Click mouse within plot area to zoom in by factor of two about that point

Or, Plot from  to  Da

Label all possible matches  Label matches used for scoring

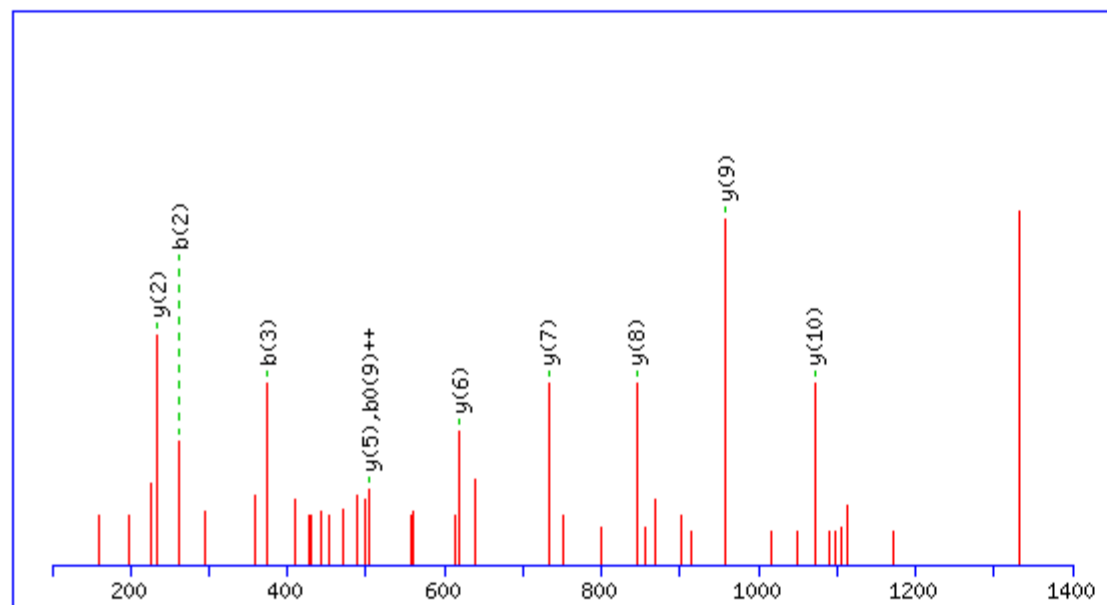

Monoisotopic mass of neutral peptide Mr(calc): 1331.781250

Fixed modifications: Propionamide (C) (apply to specified residues or termini only)

Ions Score: 63 Expect: 7.4e-007

Matches: 10/116 fragment ions using 11 most intense peaks ([help](#))

| #  | b                 | b <sup>++</sup> | b <sup>*</sup> | b <sup>*++</sup> | b <sup>0</sup> | b <sup>0++</sup>  | Seq. | y                  | y <sup>++</sup> | y <sup>*</sup> | y <sup>*++</sup> | y <sup>0</sup> | y <sup>0++</sup> | #  |
|----|-------------------|-----------------|----------------|------------------|----------------|-------------------|------|--------------------|-----------------|----------------|------------------|----------------|------------------|----|
| 1  | 115.050203        | 58.028740       | 98.023654      | 49.515465        |                |                   | N    |                    |                 |                |                  |                |                  | 12 |
| 2  | <b>262.118617</b> | 131.562946      | 245.092068     | 123.049672       |                |                   | F    | 1218.745635        | 609.876456      | 1201.719086    | 601.363181       | 1200.735070    | 600.871173       | 11 |
| 3  | <b>375.202681</b> | 188.104978      | 358.176132     | 179.591704       |                |                   | L    | <b>1071.677221</b> | 536.342248      | 1054.650672    | 527.828974       | 1053.666656    | 527.336966       | 10 |
| 4  | 488.286745        | 244.647010      | 471.260196     | 236.133736       |                |                   | L    | <b>958.593157</b>  | 479.800217      | 941.566608     | 471.286942       | 940.582592     | 470.794934       | 9  |
| 5  | 601.370809        | 301.189043      | 584.344260     | 292.675768       |                |                   | L    | <b>845.509093</b>  | 423.258184      | 828.482544     | 414.744910       | 827.498528     | 414.252902       | 8  |
| 6  | 714.454873        | 357.731075      | 697.428324     | 349.217800       |                |                   | I    | <b>732.425029</b>  | 366.716153      | 715.398480     | 358.202878       | 714.414464     | 357.710870       | 7  |
| 7  | 828.497800        | 414.752538      | 811.471251     | 406.239263       |                |                   | N    | <b>619.340965</b>  | 310.174121      | 602.314416     | 301.660846       | 601.330400     | 301.168838       | 6  |
| 8  | 915.529828        | 458.268552      | 898.503279     | 449.755277       | 897.519263     | 449.263269        | S    | <b>505.298038</b>  | 253.152657      | 488.271489     | 244.639382       | 487.287473     | 244.147374       | 5  |
| 9  | 1028.613892       | 514.810584      | 1011.587343    | 506.297309       | 1010.603327    | <b>505.805301</b> | L    | 418.266010         | 209.636643      | 401.239461     | 201.123368       | 400.255445     | 200.631360       | 4  |
| 10 | 1099.651006       | 550.329141      | 1082.624457    | 541.815866       | 1081.640441    | 541.323858        | A    | 305.181946         | 153.094611      | 288.155397     | 144.581337       | 287.171381     | 144.089329       | 3  |
| 11 | 1186.683034       | 593.845155      | 1169.656485    | 585.331881       | 1168.672469    | 584.839872        | S    | <b>234.144832</b>  | 117.576054      | 217.118283     | 109.062780       | 216.134267     | 108.570772       | 2  |
| 12 |                   |                 |                |                  |                |                   | K    | 147.112804         | 74.060040       | 130.086255     | 65.546765        |                |                  | 1  |

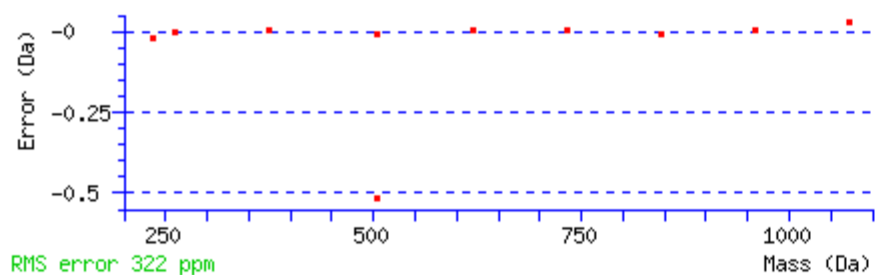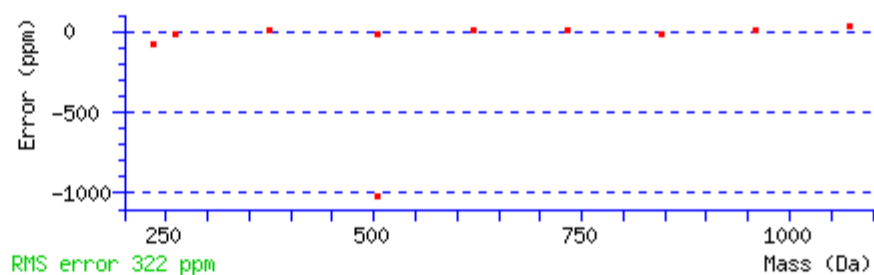

NCBI BLAST search of **NFLLINSLASK**

(Parameters: blastp, nr protein database, expect=20000, no filter, PAM30)

Other BLAST [web gateways](#)

## All matches to this query

| Score | Mr(calc):   | Delta    | Sequence                     |
|-------|-------------|----------|------------------------------|
| 62.9  | 1331.781250 | 0.006538 | <a href="#">NFLLINSLASK</a>  |
| 32.2  | 1331.781265 | 0.006523 | <a href="#">FKTQLNLLLDK</a>  |
| 5.6   | 1331.781281 | 0.006507 | <a href="#">LIVVLSDAFLSR</a> |
| 4.5   | 1331.781265 | 0.006523 | <a href="#">QKLLQSLFLDK</a>  |

# MASCOT Search Results

## Peptide View

MS/MS Fragmentation of **ASAVALEVQR**

Found in **EF2K\_HUMAN**, Eukaryotic elongation factor 2 kinase OS=Homo sapiens GN=EEF2K PE=1 SV=2

Match to Query 19702: 1042.576568 from(522.295560,2+) rtinseconds(1654) index(15239)

Title: Locus:1.1.1.2124.29

Data file 2011-11-10 - TFD - EP 4-2.mgf

Click mouse within plot area to zoom in by factor of two about that point

Or, Plot from  to  Da

Label all possible matches  Label matches used for scoring

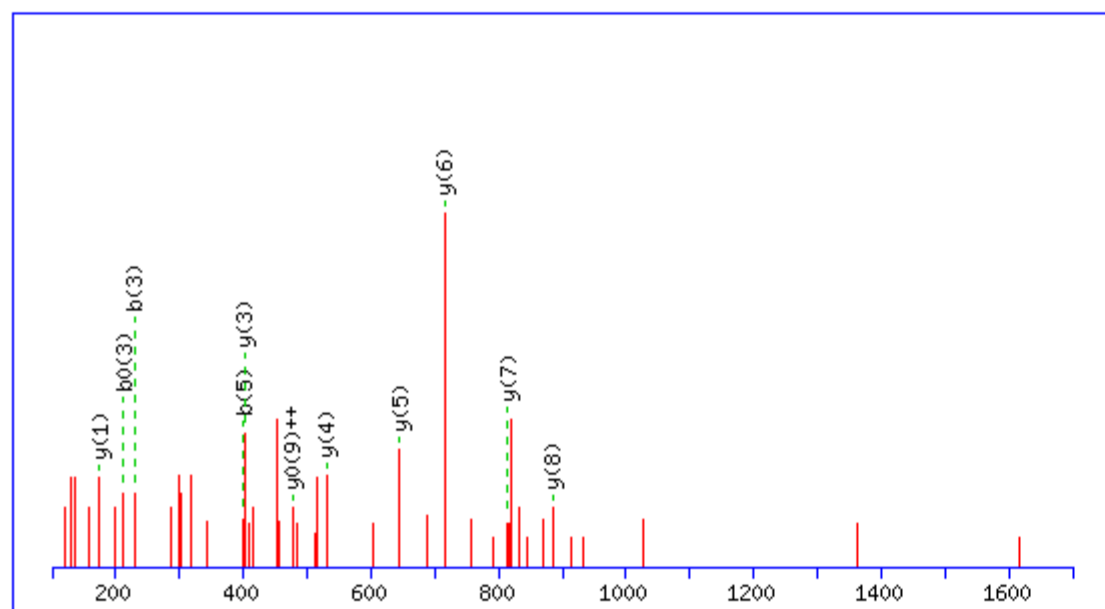

Monoisotopic mass of neutral peptide Mr(calc): 1042.577087

Fixed modifications: Propionamide (C) (apply to specified residues or termini only)

Ions Score: 35 Expect: 0.0029

Matches : 11/84 fragment ions using 31 most intense peaks [\(help\)](#)

| #  | b                 | b <sup>++</sup> | b <sup>*</sup> | b <sup>+++</sup> | b <sup>0</sup>    | b <sup>0++</sup> | Seq. | y                 | y <sup>++</sup> | y <sup>*</sup> | y <sup>+++</sup> | y <sup>0</sup> | y <sup>0++</sup> | #  |
|----|-------------------|-----------------|----------------|------------------|-------------------|------------------|------|-------------------|-----------------|----------------|------------------|----------------|------------------|----|
| 1  | 72.044390         | 36.525833       |                |                  |                   |                  | A    |                   |                 |                |                  |                |                  | 10 |
| 2  | 159.076418        | 80.041847       |                |                  | 141.065853        | 71.036564        | S    | 972.547271        | 486.777274      | 955.520722     | 478.263999       | 954.536706     | 477.771991       | 9  |
| 3  | <b>230.113532</b> | 115.560404      |                |                  | <b>212.102967</b> | 106.555121       | A    | <b>885.515243</b> | 443.261260      | 868.488694     | 434.747985       | 867.504678     | 434.255977       | 8  |
| 4  | 329.181946        | 165.094611      |                |                  | 311.171381        | 156.089328       | V    | <b>814.478129</b> | 407.742703      | 797.451580     | 399.229428       | 796.467564     | 398.737420       | 7  |
| 5  | <b>400.219060</b> | 200.613168      |                |                  | 382.208495        | 191.607885       | A    | <b>715.409715</b> | 358.208496      | 698.383166     | 349.695221       | 697.399150     | 349.203213       | 6  |
| 6  | 513.303124        | 257.155200      |                |                  | 495.292559        | 248.149918       | L    | <b>644.372601</b> | 322.689939      | 627.346052     | 314.176664       | 626.362036     | 313.684656       | 5  |
| 7  | 642.345717        | 321.676497      |                |                  | 624.335152        | 312.671214       | E    | <b>531.288537</b> | 266.147907      | 514.261988     | 257.634632       | 513.277972     | 257.142624       | 4  |
| 8  | 741.414131        | 371.210704      |                |                  | 723.403566        | 362.205421       | V    | <b>402.245944</b> | 201.626610      | 385.219395     | 193.113336       |                |                  | 3  |
| 9  | 869.472709        | 435.239993      | 852.446160     | 426.726718       | 851.462144        | 426.234710       | Q    | 303.177530        | 152.092403      | 286.150981     | 143.579129       |                |                  | 2  |
| 10 |                   |                 |                |                  |                   |                  | R    | <b>175.118952</b> | 88.063114       | 158.092403     | 79.549840        |                |                  | 1  |

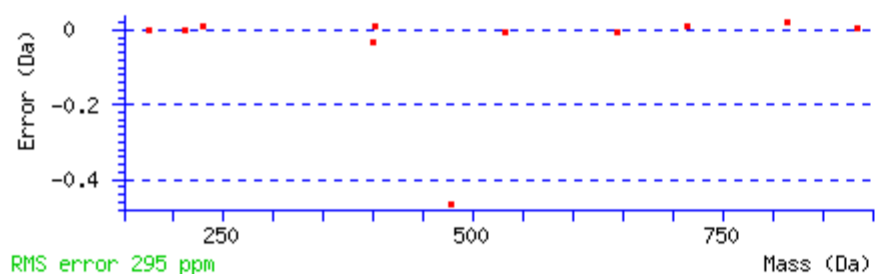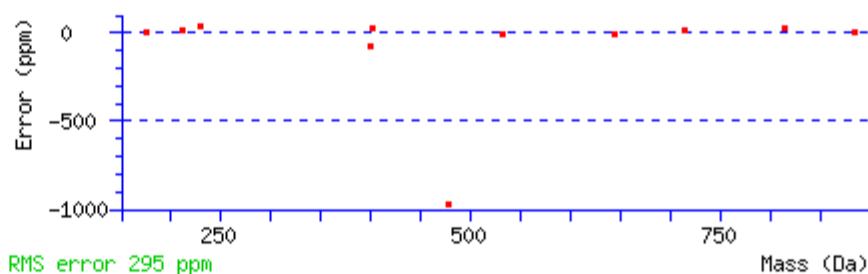

NCBI BLAST search of [ASAVALEVQR](#)

(Parameters: blastp, nr protein database, expect=20000, no filter, PAM30)

Other BLAST [web gateways](#)

All matches to this query

| Score | Mr(calc):   | Delta     | Sequence                   |
|-------|-------------|-----------|----------------------------|
| 35.4  | 1042.577087 | -0.000519 | <a href="#">ASAVALEVQR</a> |

Mascot: <http://www.matrixscience.com/>

**Peptide View**

MS/MS Fragmentation of **TLTTVQGIADDYDK**  
 Found in **EIF1B\_HUMAN**, Eukaryotic translation initiation factor 1b OS=Homo sapiens GN=EIF1B PE=1 SV=2

Match to Query 39734: 1538.740668 from(770.377610,2+) rtinseconds(2562) index(24981)  
 Title: Locus:1.1.1.2433.47  
 Data file 2011-11-10 - TFD - EP 4-7.mgf

Click mouse within plot area to zoom in by factor of two about that point  
 Or, Plot from  to  Da   
 Label all possible matches  Label matches used for scoring

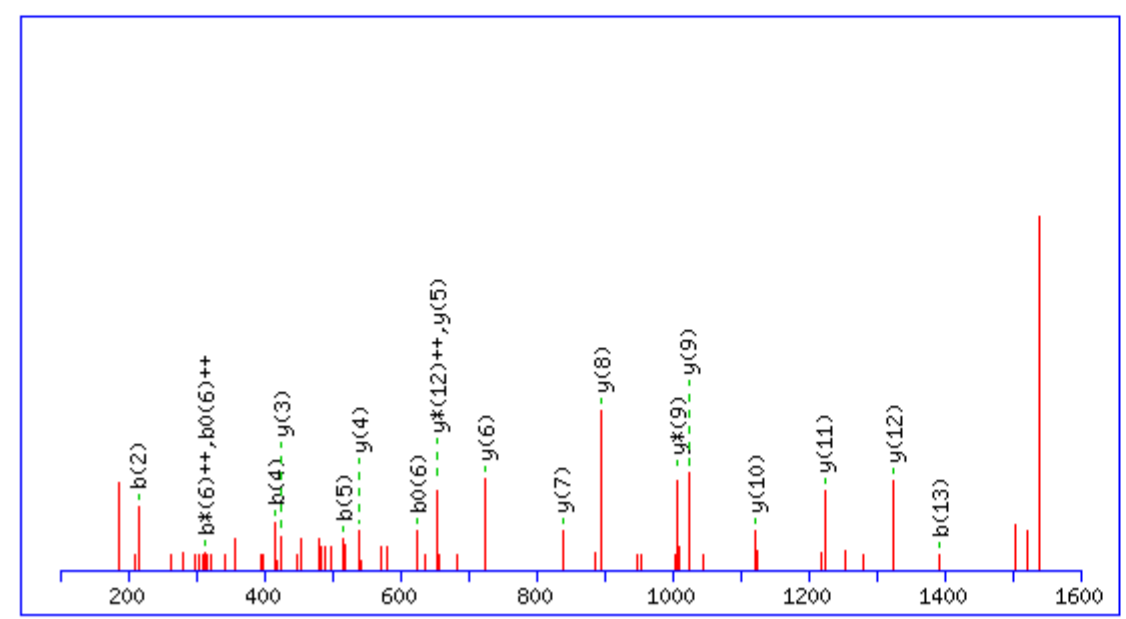

Monoisotopic mass of neutral peptide Mr(calc): 1538.746429  
 Fixed modifications: Propionamide (C) (apply to specified residues or termini only)  
 Ions Score: 87 Expect: 1.8e-008  
 Matches : 19/144 fragment ions using 25 most intense peaks [\(help\)](#)

| #  | b                  | b <sup>++</sup> | b <sup>+</sup> | b <sup>*++</sup>  | b <sup>0</sup>    | b <sup>0++</sup>  | Seq. | y                  | y <sup>++</sup> | y <sup>+</sup>     | y <sup>*++</sup>  | y <sup>0</sup> | y <sup>0++</sup> | #  |
|----|--------------------|-----------------|----------------|-------------------|-------------------|-------------------|------|--------------------|-----------------|--------------------|-------------------|----------------|------------------|----|
| 1  | 102.054955         | 51.531116       |                |                   | 84.044390         | 42.525833         | T    |                    |                 |                    |                   |                |                  | 14 |
| 2  | <b>215.139019</b>  | 108.073147      |                |                   | 197.128454        | 99.067865         | L    | 1438.706018        | 719.856647      | 1421.679469        | 711.343373        | 1420.695453    | 710.851365       | 13 |
| 3  | 316.186698         | 158.596987      |                |                   | 298.176133        | 149.591704        | T    | <b>1325.621954</b> | 663.314615      | 1308.595405        | <b>654.801341</b> | 1307.611389    | 654.309333       | 12 |
| 4  | <b>417.234377</b>  | 209.120826      |                |                   | 399.223812        | 200.115544        | T    | <b>1224.574275</b> | 612.790776      | 1207.547726        | 604.277501        | 1206.563710    | 603.785493       | 11 |
| 5  | <b>516.302791</b>  | 258.655034      |                |                   | 498.292226        | 249.649751        | V    | <b>1123.526596</b> | 562.266936      | 1106.500047        | 553.753662        | 1105.516031    | 553.261654       | 10 |
| 6  | 644.361369         | 322.684323      | 627.334820     | <b>314.171048</b> | <b>626.350804</b> | <b>313.679040</b> | Q    | <b>1024.458182</b> | 512.732729      | <b>1007.431633</b> | 504.219455        | 1006.447617    | 503.727447       | 9  |
| 7  | 701.382833         | 351.195055      | 684.356284     | 342.681780        | 683.372268        | 342.189772        | G    | <b>896.399604</b>  | 448.703440      | 879.373055         | 440.190166        | 878.389039     | 439.698158       | 8  |
| 8  | 814.466897         | 407.737087      | 797.440348     | 399.223812        | 796.456332        | 398.731804        | I    | <b>839.378140</b>  | 420.192708      | 822.351591         | 411.679434        | 821.367575     | 411.187426       | 7  |
| 9  | 885.504011         | 443.255644      | 868.477462     | 434.742369        | 867.493446        | 434.250361        | A    | <b>726.294076</b>  | 363.650676      | 709.267527         | 355.137402        | 708.283511     | 354.645394       | 6  |
| 10 | 1000.530954        | 500.769115      | 983.504405     | 492.255841        | 982.520389        | 491.763833        | D    | <b>655.256962</b>  | 328.132119      | 638.230413         | 319.618845        | 637.246397     | 319.126837       | 5  |
| 11 | 1115.557897        | 558.282587      | 1098.531348    | 549.769312        | 1097.547332       | 549.277304        | D    | <b>540.230019</b>  | 270.618648      | 523.203470         | 262.105373        | 522.219454     | 261.613365       | 4  |
| 12 | 1278.621226        | 639.814251      | 1261.594677    | 631.300977        | 1260.610661       | 630.808969        | Y    | <b>425.203076</b>  | 213.105176      | 408.176527         | 204.591902        | 407.192511     | 204.099894       | 3  |
| 13 | <b>1393.648169</b> | 697.327723      | 1376.621620    | 688.814448        | 1375.637604       | 688.322440        | D    | 262.139747         | 131.573512      | 245.113198         | 123.060237        | 244.129182     | 122.568229       | 2  |
| 14 |                    |                 |                |                   |                   |                   | K    | 147.112804         | 74.060040       | 130.086255         | 65.546765         |                |                  | 1  |

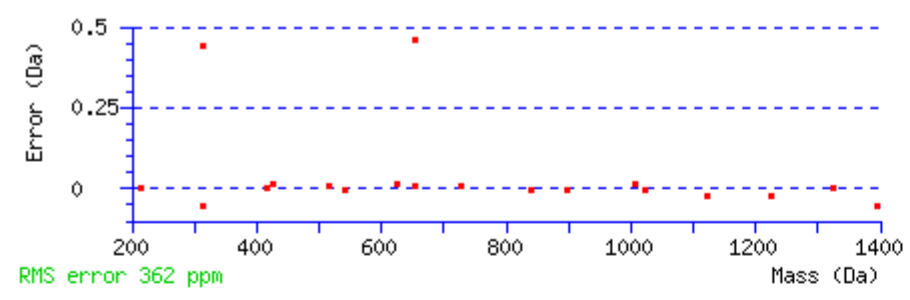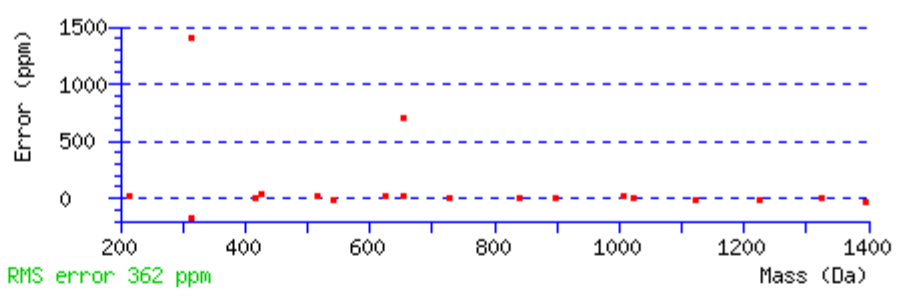

NCBI BLAST search of **TLTTVQGIADDYDK**  
 (Parameters: blastp, nr protein database, expect=20000, no filter, PAM30)  
 Other BLAST [web gateways](#)

**All matches to this query**

| Score | Mr(calc):   | Delta     | Sequence                         |
|-------|-------------|-----------|----------------------------------|
| 87.5  | 1538.746429 | -0.005761 | <a href="#">TLTTVQGIADDYDK</a>   |
| 4.7   | 1538.737183 | 0.003485  | <a href="#">MEKHNAQGQGNGLR</a>   |
| 3.7   | 1538.754929 | -0.014261 | <a href="#">DEARPGGAEAAAPSRR</a> |
| 2.6   | 1538.754959 | -0.014291 | <a href="#">NQANPSRQPGSVPR</a>   |

# MASCOT Search Results

## Peptide View

MS/MS Fragmentation of **INLIAPPR**

Found in **IF2A\_HUMAN**, Eukaryotic translation initiation factor 2 subunit 1 OS=Homo sapiens GN=EIF2S1 PE=1 SV=3

Match to Query 3731: 892.551008 from(447.282780,2+) rtinseconds(1974) index(22215)

Title: Locus:1.1.1.1134.6

Data file 2012-01-27 - TFD - Epitel - IEC - 10ul - 2.mgf

Click mouse within plot area to zoom in by factor of two about that point

Or, Plot from  to  Da

Label all possible matches  Label matches used for scoring

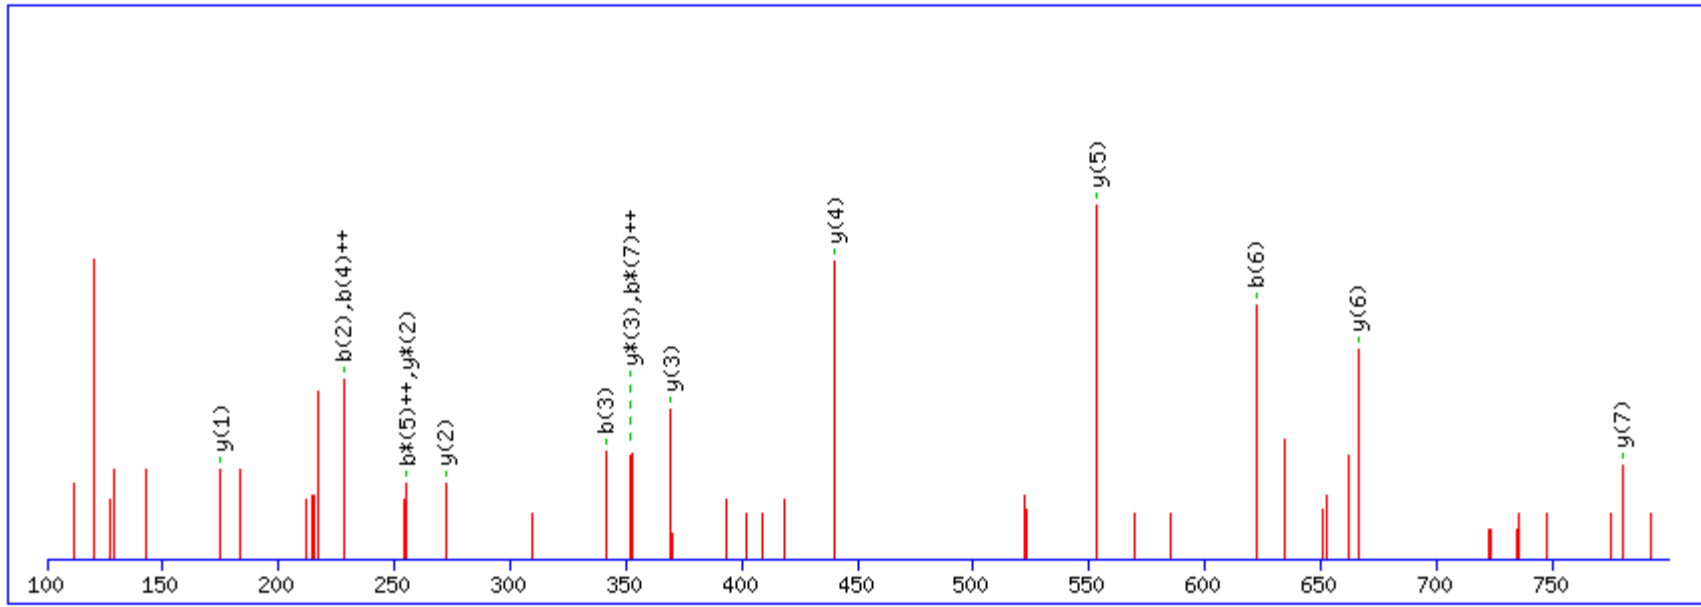

Monoisotopic mass of neutral peptide  $M_r(\text{calc})$ : 892.549408

Fixed modifications: Carbamidomethyl (C) (apply to specified residues or termini only)

Ions Score: 44 Expect: 5.2e-005

Matches : 15/54 fragment ions using 26 most intense peaks [\(help\)](#)

| # | b                 | b <sup>++</sup>   | b <sup>*</sup> | b <sup>*++</sup>  | Seq. | y                 | y <sup>++</sup> | y <sup>*</sup>    | y <sup>*++</sup> | # |
|---|-------------------|-------------------|----------------|-------------------|------|-------------------|-----------------|-------------------|------------------|---|
| 1 | 114.091340        | 57.549308         |                |                   | I    |                   |                 |                   |                  | 8 |
| 2 | <b>228.134267</b> | 114.570771        | 211.107718     | 106.057497        | N    | <b>780.472649</b> | 390.739963      | 763.446100        | 382.226688       | 7 |
| 3 | <b>341.218331</b> | 171.112803        | 324.191782     | 162.599529        | L    | <b>666.429722</b> | 333.718499      | 649.403173        | 325.205225       | 6 |
| 4 | 454.302395        | <b>227.654835</b> | 437.275846     | 219.141561        | I    | <b>553.345658</b> | 277.176467      | 536.319109        | 268.663193       | 5 |
| 5 | 525.339509        | 263.173393        | 508.312960     | <b>254.660118</b> | A    | <b>440.261594</b> | 220.634435      | 423.235045        | 212.121161       | 4 |
| 6 | <b>622.392273</b> | 311.699775        | 605.365724     | 303.186500        | P    | <b>369.224480</b> | 185.115878      | <b>352.197931</b> | 176.602604       | 3 |
| 7 | 719.445037        | 360.226157        | 702.418488     | <b>351.712882</b> | P    | <b>272.171716</b> | 136.589496      | <b>255.145167</b> | 128.076222       | 2 |
| 8 |                   |                   |                |                   | R    | <b>175.118952</b> | 88.063114       | 158.092403        | 79.549840        | 1 |

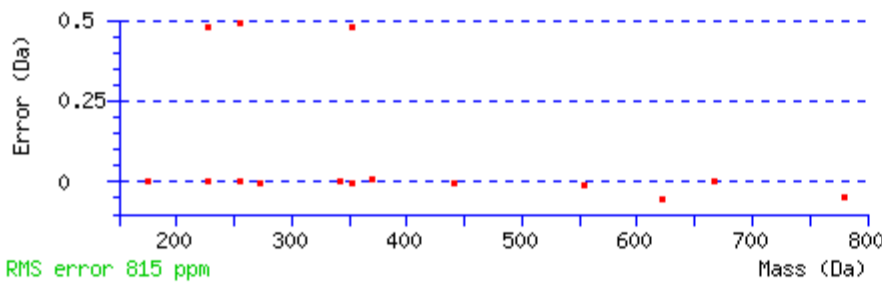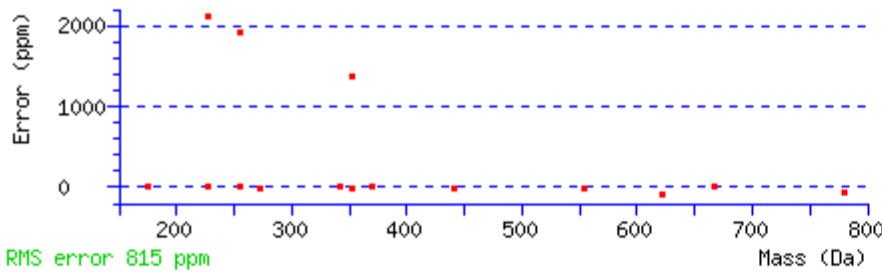

NCBI BLAST search of [INLIAPPR](#)

(Parameters: blastp, nr protein database, expect=20000, no filter, PAM30)

Other BLAST [web gateways](#)

## All matches to this query

| Score | $M_r(\text{calc})$ : | Delta    | Sequence                  |
|-------|----------------------|----------|---------------------------|
| 44.3  | 892.549408           | 0.001600 | <a href="#">INLIAPPR</a>  |
| 7.3   | 892.549423           | 0.001585 | <a href="#">RGPLPIPK</a>  |
| 3.0   | 892.549423           | 0.001585 | <a href="#">LQIGPIPR</a>  |
| 1.2   | 892.549423           | 0.001585 | <a href="#">LALAPVGPR</a> |

# MASCOT SCIENCE Mascot Search Results

## Peptide View

MS/MS Fragmentation of **ELLGQGLLR**

Found in **EIF3C\_HUMAN**, Eukaryotic translation initiation factor 3 subunit C OS=Homo sapiens GN=EIF3C PE=1 SV=1

Match to Query 17218: 1110.666488 from(556.340520,2+) rtinseconds(3112) index(43526)

Title: Locus:1.1.1.1626.6

Data file 2012-01-27 - TFD - Epitel - IEC - 10ul - 3.mgf

Click mouse within plot area to zoom in by factor of two about that point

Or, Plot from  to  Da

Label all possible matches  Label matches used for scoring

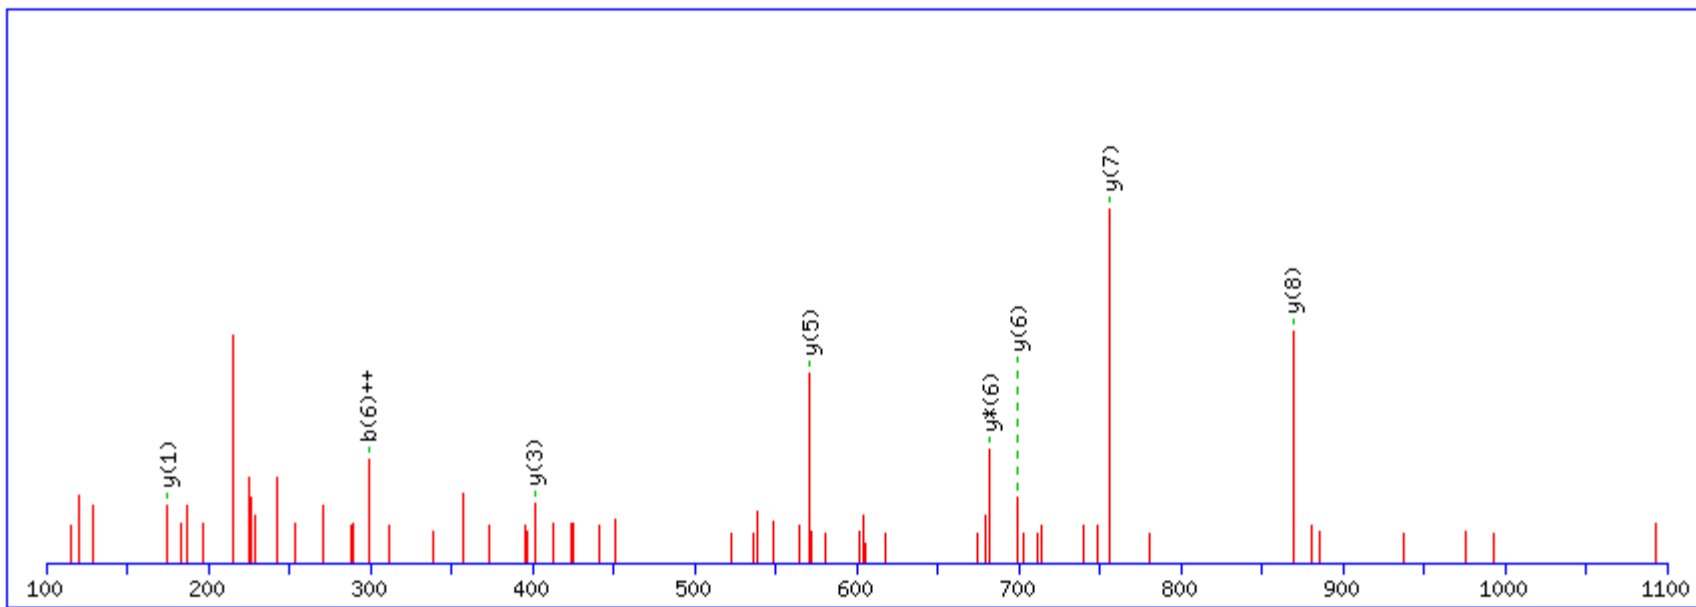

Monoisotopic mass of neutral peptide Mr(calc): 1110.676071

Fixed modifications: Carbamidomethyl (C) (apply to specified residues or termini only)

Ions Score: 31 Expect: 0.0023

Matches : 8/82 fragment ions using 19 most intense peaks [\(help\)](#)

| #  | b          | b <sup>++</sup>   | b <sup>*</sup> | b <sup>*++</sup> | b <sup>0</sup> | b <sup>0++</sup> | Seq. | y                 | y <sup>++</sup> | y <sup>*</sup>    | y <sup>*++</sup> | #  |
|----|------------|-------------------|----------------|------------------|----------------|------------------|------|-------------------|-----------------|-------------------|------------------|----|
| 1  | 130.049869 | 65.528572         |                |                  | 112.039304     | 56.523290        | E    |                   |                 |                   |                  | 10 |
| 2  | 243.133933 | 122.070605        |                |                  | 225.123368     | 113.065322       | L    | 982.640778        | 491.824027      | 965.614229        | 483.310753       | 9  |
| 3  | 356.217997 | 178.612637        |                |                  | 338.207432     | 169.607354       | L    | <b>869.556714</b> | 435.281995      | 852.530165        | 426.768721       | 8  |
| 4  | 413.239461 | 207.123369        |                |                  | 395.228896     | 198.118086       | G    | <b>756.472650</b> | 378.739963      | 739.446101        | 370.226689       | 7  |
| 5  | 541.298039 | 271.152658        | 524.271490     | 262.639383       | 523.287474     | 262.147375       | Q    | <b>699.451186</b> | 350.229231      | <b>682.424637</b> | 341.715957       | 6  |
| 6  | 598.319503 | <b>299.663390</b> | 581.292954     | 291.150115       | 580.308938     | 290.658107       | G    | <b>571.392608</b> | 286.199942      | 554.366059        | 277.686668       | 5  |
| 7  | 711.403567 | 356.205422        | 694.377018     | 347.692147       | 693.393002     | 347.200139       | L    | 514.371144        | 257.689210      | 497.344595        | 249.175936       | 4  |
| 8  | 824.487631 | 412.747454        | 807.461082     | 404.234179       | 806.477066     | 403.742171       | L    | <b>401.287080</b> | 201.147178      | 384.260531        | 192.633903       | 3  |
| 9  | 937.571695 | 469.289486        | 920.545146     | 460.776211       | 919.561130     | 460.284203       | L    | 288.203016        | 144.605146      | 271.176467        | 136.091871       | 2  |
| 10 |            |                   |                |                  |                |                  | R    | <b>175.118952</b> | 88.063114       | 158.092403        | 79.549839        | 1  |

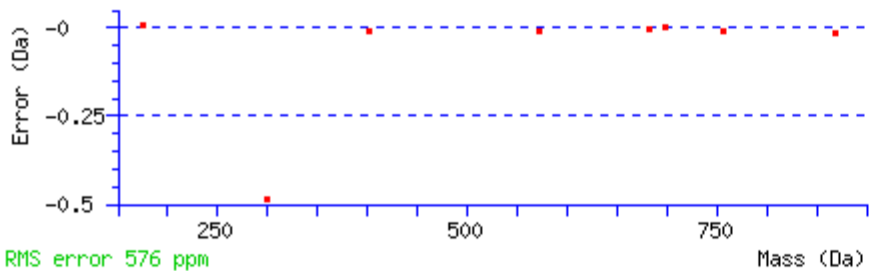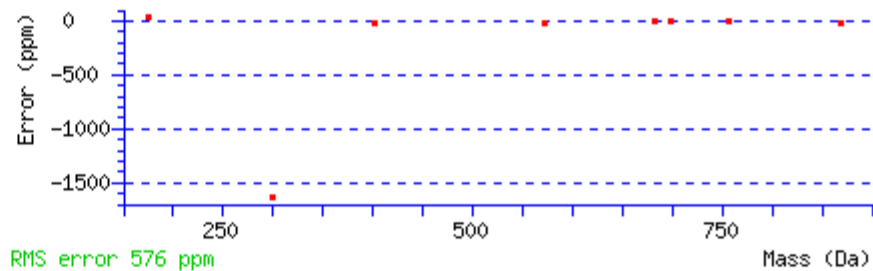

NCBI BLAST search of [ELLGQGLLR](#)

(Parameters: blastp, nr protein database, expect=20000, no filter, PAM30)

Other BLAST [web gateways](#)

## All matches to this query

| Score | Mr(calc):   | Delta     | Sequence                     |
|-------|-------------|-----------|------------------------------|
| 30.8  | 1110.676071 | -0.009583 | <a href="#">ELLGQGLLR</a>    |
| 9.1   | 1110.676071 | -0.009583 | <a href="#">LLGNLLPIR</a>    |
| 4.1   | 1110.676071 | -0.009583 | <a href="#">ELLIIGVVAAR</a>  |
| 2.4   | 1110.662125 | 0.004363  | <a href="#">AARGAAAAALLR</a> |

**Peptide View**

MS/MS Fragmentation of **YNPENLATLER**

Found in **EIF3K\_HUMAN**, Eukaryotic translation initiation factor 3 subunit K OS=Homo sapiens GN=EIF3K PE=1 SV=1

Match to Query 32756: 1318.647128 from(660.330840,2+) rtinseconds(2244) index(27203)

Title: Locus:1.1.1.1299.33

Data file 2012-01-27 - TFD - Epitel - IEC - 10ul - 3.mgf

Click mouse within plot area to zoom in by factor of two about that point

Or, Plot from  to  Da

Label all possible matches  Label matches used for scoring

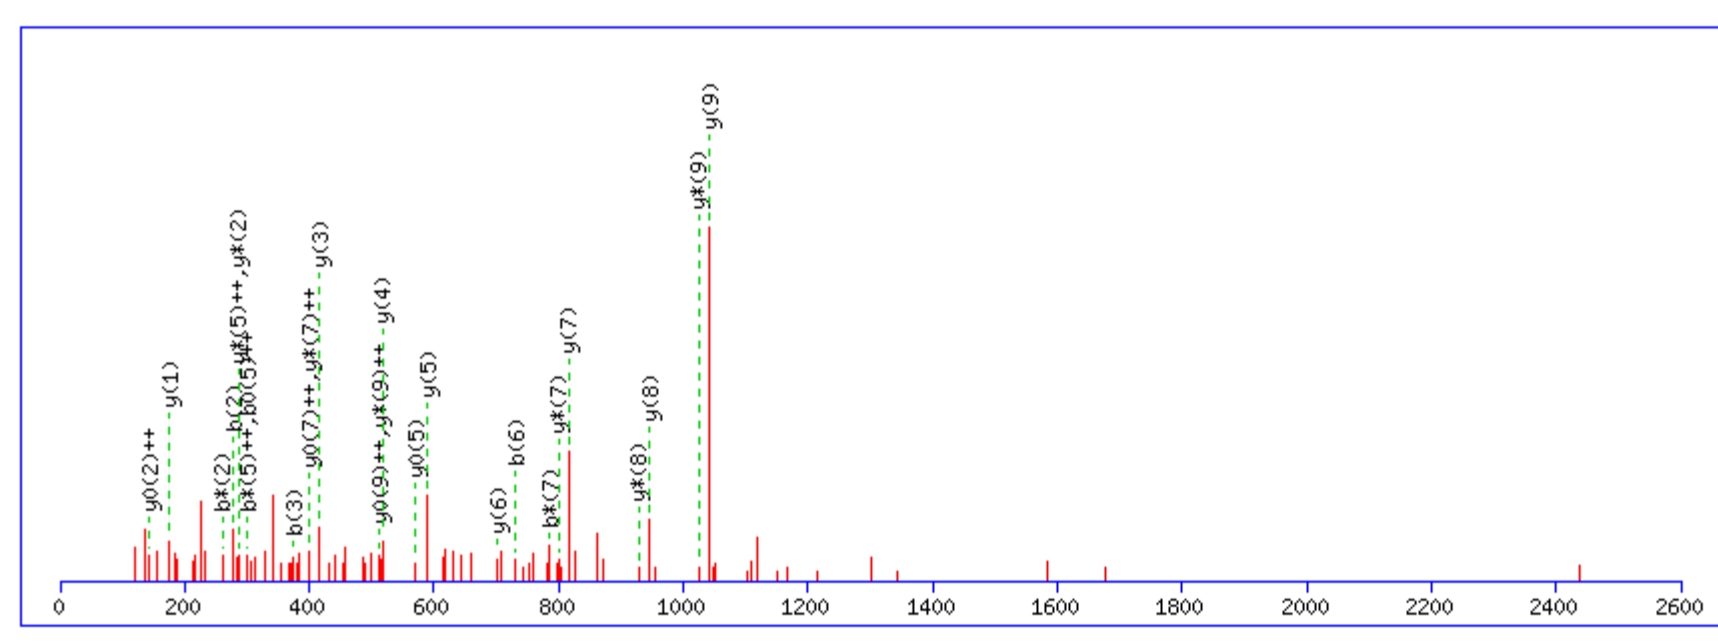

Monoisotopic mass of neutral peptide Mr(calc): 1318.651688

Fixed modifications: Carbamidomethyl (C) (apply to specified residues or termini only)

Ions Score: 34 Expect: 0.0054

Matches : 27/110 fragment ions using 61 most intense peaks [\(help\)](#)

| #  | b                 | b <sup>++</sup> | b <sup>*</sup>    | b <sup>*++</sup>  | b <sup>0</sup> | b <sup>0++</sup>  | Seq. | y                  | y <sup>++</sup> | y <sup>*</sup>     | y <sup>*++</sup>  | y <sup>0</sup>    | y <sup>0++</sup>  | #  |
|----|-------------------|-----------------|-------------------|-------------------|----------------|-------------------|------|--------------------|-----------------|--------------------|-------------------|-------------------|-------------------|----|
| 1  | 164.070605        | 82.538940       |                   |                   |                |                   | Y    |                    |                 |                    |                   |                   |                   | 11 |
| 2  | <b>278.113532</b> | 139.560404      | <b>261.086983</b> | 131.047130        |                |                   | N    | 1156.595677        | 578.801477      | 1139.569128        | 570.288202        | 1138.585112       | 569.796194        | 10 |
| 3  | <b>375.166296</b> | 188.086786      | 358.139747        | 179.573512        |                |                   | P    | <b>1042.552750</b> | 521.780013      | <b>1025.526201</b> | <b>513.266739</b> | 1024.542185       | <b>512.774731</b> | 9  |
| 4  | 504.208889        | 252.608083      | 487.182340        | 244.094808        | 486.198324     | 243.602800        | E    | <b>945.499986</b>  | 473.253631      | <b>928.473437</b>  | 464.740357        | 927.489421        | 464.248349        | 8  |
| 5  | 618.251816        | 309.629546      | 601.225267        | <b>301.116272</b> | 600.241251     | <b>300.624264</b> | N    | <b>816.457393</b>  | 408.732335      | <b>799.430844</b>  | <b>400.219060</b> | 798.446828        | <b>399.727052</b> | 7  |
| 6  | <b>731.335880</b> | 366.171578      | 714.309331        | 357.658304        | 713.325315     | 357.166296        | L    | <b>702.414466</b>  | 351.710871      | 685.387917         | 343.197597        | 684.403901        | 342.705589        | 6  |
| 7  | 802.372994        | 401.690135      | <b>785.346445</b> | 393.176861        | 784.362429     | 392.684853        | A    | <b>589.330402</b>  | 295.168839      | 572.303853         | <b>286.655565</b> | <b>571.319837</b> | 286.163557        | 5  |
| 8  | 903.420673        | 452.213975      | 886.394124        | 443.700700        | 885.410108     | 443.208692        | T    | <b>518.293288</b>  | 259.650282      | 501.266739         | 251.137008        | 500.282723        | 250.645000        | 4  |
| 9  | 1016.504737       | 508.756007      | 999.478188        | 500.242732        | 998.494172     | 499.750724        | L    | <b>417.245609</b>  | 209.126442      | <b>400.219060</b>  | 200.613168        | 399.235044        | 200.121160        | 3  |
| 10 | 1145.547330       | 573.277303      | 1128.520781       | 564.764029        | 1127.536765    | 564.272021        | E    | 304.161545         | 152.584410      | <b>287.134996</b>  | 144.071136        | 286.150980        | <b>143.579128</b> | 2  |
| 11 |                   |                 |                   |                   |                |                   | R    | <b>175.118952</b>  | 88.063114       | 158.092403         | 79.549839         |                   |                   | 1  |

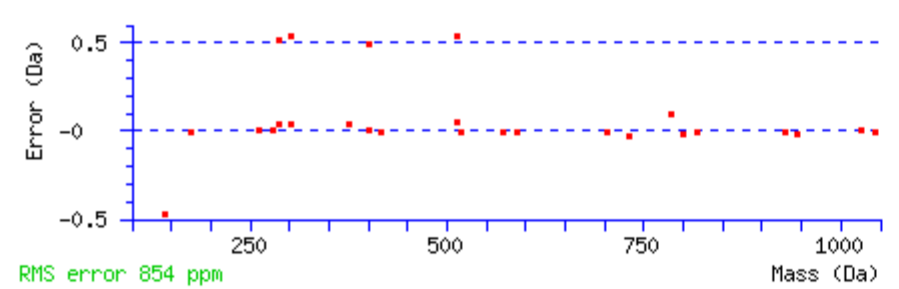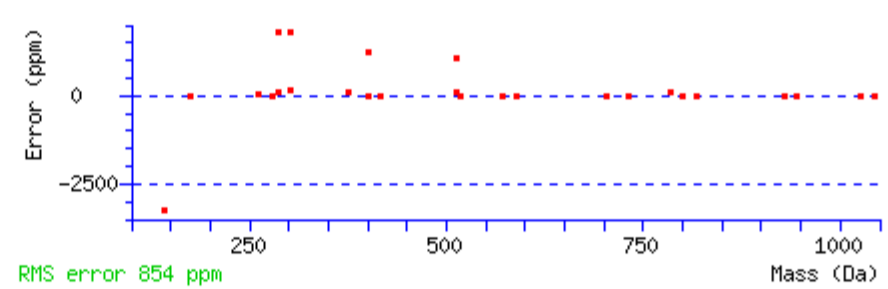

NCBI BLAST search of **YNPENLATLER**

(Parameters: blastp, nr protein database, expect=20000, no filter, PAM30)

Other BLAST [web gateways](#)

**All matches to this query**

| Score | Mr(calc):   | Delta     | Sequence                     |
|-------|-------------|-----------|------------------------------|
| 34.0  | 1318.651688 | -0.004560 | <a href="#">YNPENLATLER</a>  |
| 3.2   | 1318.637970 | 0.009158  | <a href="#">SLYWLHELQM</a>   |
| 2.9   | 1318.645218 | 0.001910  | <a href="#">GPPPPGMRPPRP</a> |
| 2.5   | 1318.655090 | -0.007962 | <a href="#">GVIDMGNSLIER</a> |



# **MATRIX** SCIENCE Mascot Search Results

## Peptide View

MS/MS Fragmentation of **GLSFLFPLLK**

Found in **IF4G2\_HUMAN**, Eukaryotic translation initiation factor 4 gamma 2 OS=Homo sapiens GN=EIF4G2 PE=1 SV=1

Match to Query 26841: 1133.688228 from(567.851390,2+) rtinseconds(4428) index(67291)

Title: Locus:1.1.1.3060.13

Data file 2011-11-14 - TFD - EP 8-4.mgf

Click mouse within plot area to zoom in by factor of two about that point

Or, Plot from  to  Da

Label all possible matches  Label matches used for scoring

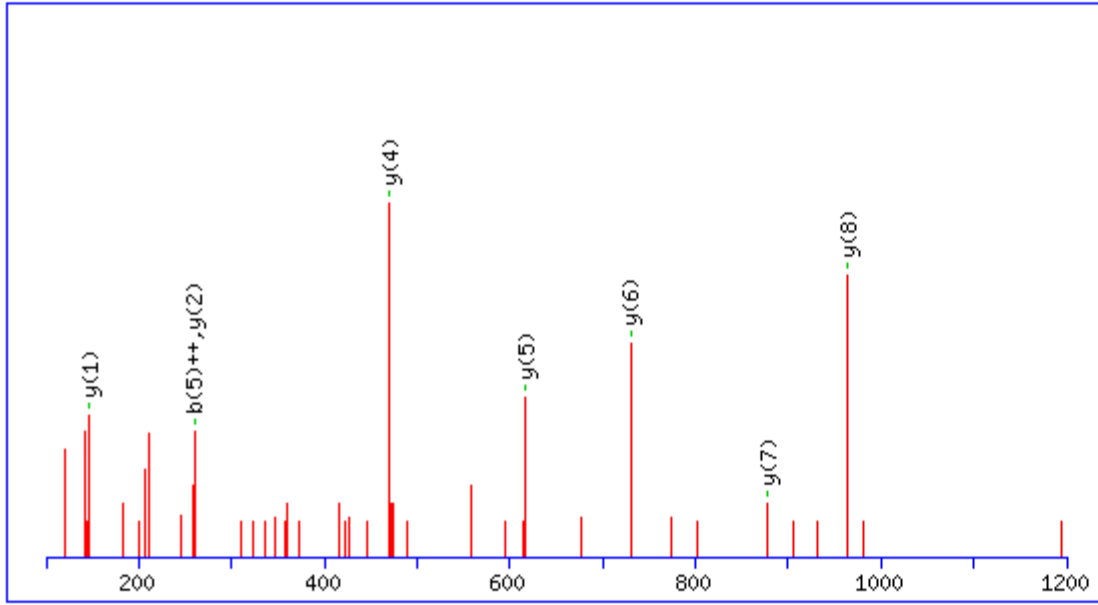

Monoisotopic mass of neutral peptide Mr(calc): 1133.684860

Fixed modifications: Propionamide (C) (apply to specified residues or termini only)

Ions Score: 64 Expect: 6.7e-007

Matches : 8/72 fragment ions using 9 most intense peaks [\(help\)](#)

| #  | b          | b <sup>++</sup>   | b <sup>0</sup> | b <sup>0++</sup> | Seq. | y                 | y <sup>++</sup> | y <sup>*</sup> | y <sup>*++</sup> | y <sup>0</sup> | y <sup>0++</sup> | #  |
|----|------------|-------------------|----------------|------------------|------|-------------------|-----------------|----------------|------------------|----------------|------------------|----|
| 1  | 58.028740  | 29.518008         |                |                  | G    |                   |                 |                |                  |                |                  | 10 |
| 2  | 171.112804 | 86.060040         |                |                  | L    | 1077.670680       | 539.338978      | 1060.644131    | 530.825704       | 1059.660115    | 530.333696       | 9  |
| 3  | 258.144832 | 129.576054        | 240.134267     | 120.570772       | S    | <b>964.586616</b> | 482.796946      | 947.560067     | 474.283672       | 946.576051     | 473.791664       | 8  |
| 4  | 405.213246 | 203.110261        | 387.202681     | 194.104978       | F    | <b>877.554588</b> | 439.280932      | 860.528039     | 430.767658       |                |                  | 7  |
| 5  | 518.297310 | <b>259.652293</b> | 500.286745     | 250.647011       | L    | <b>730.486174</b> | 365.746725      | 713.459625     | 357.233451       |                |                  | 6  |
| 6  | 665.365724 | 333.186500        | 647.355159     | 324.181218       | F    | <b>617.402110</b> | 309.204693      | 600.375561     | 300.691419       |                |                  | 5  |
| 7  | 762.418488 | 381.712882        | 744.407923     | 372.707600       | P    | <b>470.333696</b> | 235.670486      | 453.307147     | 227.157212       |                |                  | 4  |
| 8  | 875.502552 | 438.254914        | 857.491987     | 429.249632       | L    | 373.280932        | 187.144104      | 356.254383     | 178.630830       |                |                  | 3  |
| 9  | 988.586616 | 494.796946        | 970.576051     | 485.791664       | L    | <b>260.196868</b> | 130.602072      | 243.170319     | 122.088798       |                |                  | 2  |
| 10 |            |                   |                |                  | K    | <b>147.112804</b> | 74.060040       | 130.086255     | 65.546765        |                |                  | 1  |

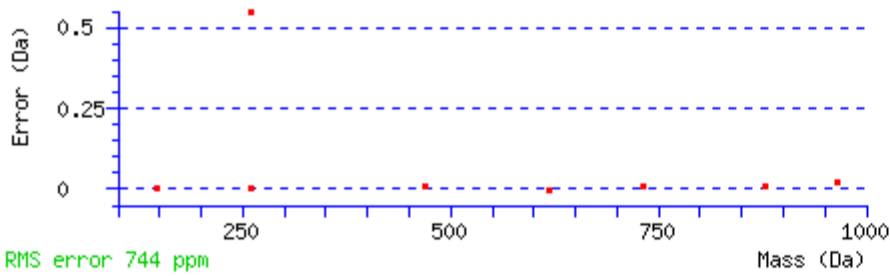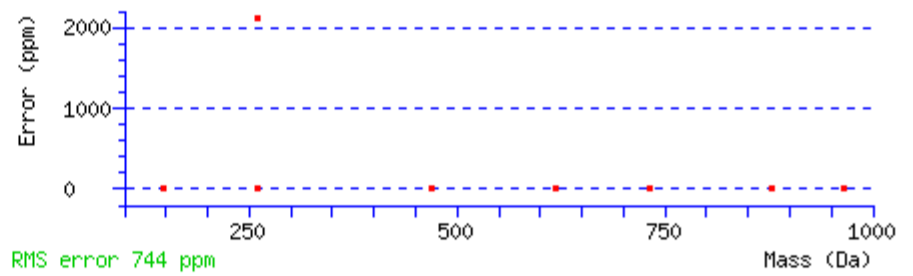

NCBI BLAST search of **GLSFLFPLLK**

(Parameters: blastp, nr protein database, expect=20000, no filter, PAM30)

Other BLAST [web gateways](#)

## All matches to this query

| Score | Mr(calc):   | Delta    | Sequence                   |
|-------|-------------|----------|----------------------------|
| 63.5  | 1133.684860 | 0.003368 | <a href="#">GLSFLFPLLK</a> |
| 4.1   | 1133.680817 | 0.007411 | <a href="#">KTNLFSALIK</a> |
| 1.3   | 1133.680847 | 0.007381 | <a href="#">QIFVKTLTGK</a> |

Mascot: <http://www.matrixscience.com/>

# Mascot Search Results

## Peptide View

MS/MS Fragmentation of **ALPPAAAPPAGAREPPGSR**

Found in **IF4E3\_HUMAN**, Eukaryotic translation initiation factor 4E type 3 OS=Homo sapiens GN=EIF4E3 PE=2 SV=4

Match to Query 55023: 1829.944662 from(610.988830,3+) rtinseconds(3212) index(43852)

Title: Locus:1.1.1.2544.21

Data file 2011-11-14 - TFD - EP 8-5.mgf

Click mouse within plot area to zoom in by factor of two about that point

Or, Plot from  to  Da

Label all possible matches  Label matches used for scoring

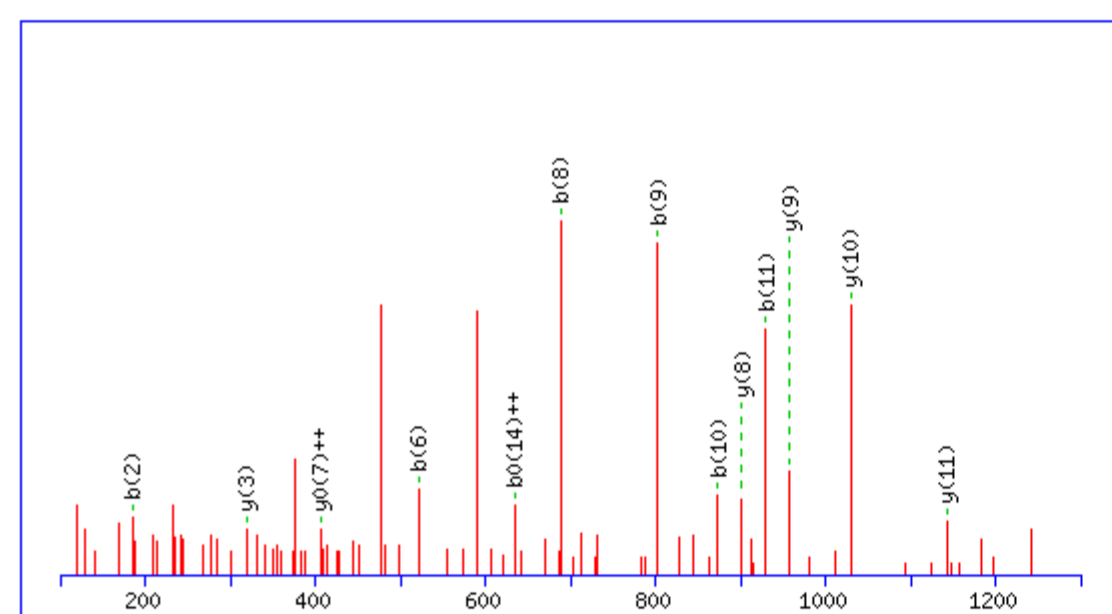

Monoisotopic mass of neutral peptide Mr(calc): 1829.938385

Fixed modifications: Propionamide (C) (apply to specified residues or termini only)

Variable modifications:

P9 : Oxidation (P)

P15 : Oxidation (P)

P16 : Oxidation (P)

Ions Score: 31 Expect: 0.0074

Matches : 13/164 fragment ions using 23 most intense peaks [\(help\)](#)

| #  | b                 | b <sup>++</sup> | b <sup>*</sup> | b <sup>*++</sup> | b <sup>0</sup> | b <sup>0++</sup>  | Seq. | y                  | y <sup>++</sup> | y <sup>*</sup> | y <sup>*++</sup> | y <sup>0</sup> | y <sup>0++</sup>  | #  |
|----|-------------------|-----------------|----------------|------------------|----------------|-------------------|------|--------------------|-----------------|----------------|------------------|----------------|-------------------|----|
| 1  | 72.044390         | 36.525833       |                |                  |                |                   | A    |                    |                 |                |                  |                |                   | 19 |
| 2  | <b>185.128454</b> | 93.067865       |                |                  |                |                   | L    | 1759.908575        | 880.457925      | 1742.882026    | 871.944651       | 1741.898010    | 871.452643        | 18 |
| 3  | 282.181218        | 141.594247      |                |                  |                |                   | P    | 1646.824511        | 823.915894      | 1629.797962    | 815.402619       | 1628.813946    | 814.910611        | 17 |
| 4  | 379.233982        | 190.120629      |                |                  |                |                   | P    | 1549.771747        | 775.389512      | 1532.745198    | 766.876237       | 1531.761182    | 766.384229        | 16 |
| 5  | 450.271096        | 225.639186      |                |                  |                |                   | A    | 1452.718983        | 726.863130      | 1435.692434    | 718.349855       | 1434.708418    | 717.857847        | 15 |
| 6  | <b>521.308210</b> | 261.157743      |                |                  |                |                   | A    | 1381.681869        | 691.344572      | 1364.655320    | 682.831298       | 1363.671304    | 682.339290        | 14 |
| 7  | 592.345324        | 296.676300      |                |                  |                |                   | A    | 1310.644755        | 655.826016      | 1293.618206    | 647.312741       | 1292.634190    | 646.820733        | 13 |
| 8  | <b>689.398088</b> | 345.202682      |                |                  |                |                   | P    | 1239.607641        | 620.307458      | 1222.581092    | 611.794184       | 1221.597076    | 611.302176        | 12 |
| 9  | <b>802.445767</b> | 401.726522      |                |                  |                |                   | P    | <b>1142.554877</b> | 571.781076      | 1125.528328    | 563.267802       | 1124.544312    | 562.775794        | 11 |
| 10 | <b>873.482881</b> | 437.245079      |                |                  |                |                   | A    | <b>1029.507198</b> | 515.257237      | 1012.480649    | 506.743963       | 1011.496633    | 506.251955        | 10 |
| 11 | <b>930.504345</b> | 465.755811      |                |                  |                |                   | G    | <b>958.470084</b>  | 479.738680      | 941.443535     | 471.225405       | 940.459519     | 470.733397        | 9  |
| 12 | 1001.541459       | 501.274368      |                |                  |                |                   | A    | <b>901.448620</b>  | 451.227948      | 884.422071     | 442.714673       | 883.438055     | 442.222665        | 8  |
| 13 | 1157.642570       | 579.324923      | 1140.616021    | 570.811649       |                |                   | R    | 830.411506         | 415.709391      | 813.384957     | 407.196116       | 812.400941     | <b>406.704108</b> | 7  |
| 14 | 1286.685163       | 643.846219      | 1269.658614    | 635.332945       | 1268.674598    | <b>634.840937</b> | E    | 674.310395         | 337.658836      | 657.283846     | 329.145561       | 656.299830     | 328.653553        | 6  |
| 15 | 1399.732842       | 700.370059      | 1382.706293    | 691.856785       | 1381.722277    | 691.364776        | P    | 545.267802         | 273.137539      | 528.241253     | 264.624265       | 527.257237     | 264.132257        | 5  |
| 16 | 1512.780521       | 756.893898      | 1495.753972    | 748.380624       | 1494.769956    | 747.888616        | P    | 432.220123         | 216.613699      | 415.193574     | 208.100425       | 414.209558     | 207.608417        | 4  |
| 17 | 1569.801985       | 785.404630      | 1552.775436    | 776.891356       | 1551.791420    | 776.399348        | G    | <b>319.172444</b>  | 160.089860      | 302.145895     | 151.576585       | 301.161879     | 151.084577        | 3  |
| 18 | 1656.834013       | 828.920644      | 1639.807464    | 820.407370       | 1638.823448    | 819.915362        | S    | 262.150980         | 131.579128      | 245.124431     | 123.065854       | 244.140415     | 122.573846        | 2  |
| 19 |                   |                 |                |                  |                |                   | R    | 175.118952         | 88.063114       | 158.092403     | 79.549839        |                |                   | 1  |

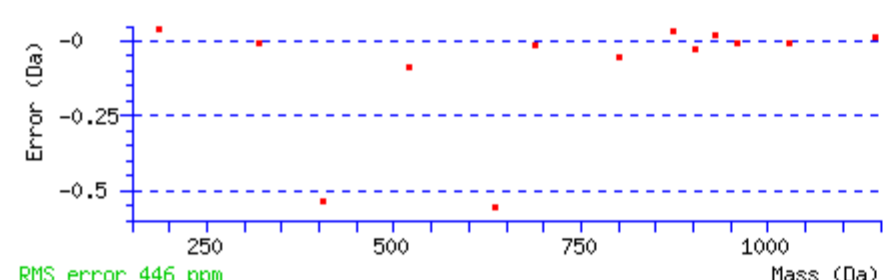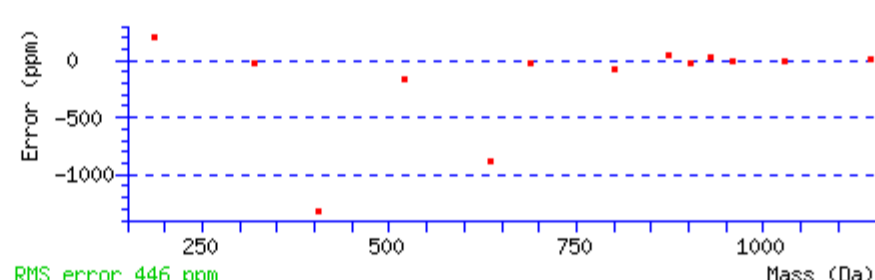

NCBI BLAST search of [ALPPAAAPPAGAREPPGSR](#)

(Parameters: blastp, nr protein database, expect=20000, no filter, PAM30)

Other BLAST [web gateways](#)

## All matches to this query

| Score | Mr(calc):   | Delta     | Sequence                            |
|-------|-------------|-----------|-------------------------------------|
| 31.0  | 1829.938385 | 0.006277  | <a href="#">ALPPAAAPPAGAREPPGSR</a> |
| 13.6  | 1829.938385 | 0.006277  | <a href="#">ALPPAAAPPAGAREPPGSR</a> |
| 7.8   | 1829.931183 | 0.013479  | <a href="#">EPAPLDKYQPPPPPPR</a>    |
| 5.0   | 1829.957672 | -0.013010 | <a href="#">GFVYSSFLKPYNPRR</a>     |
| 4.3   | 1829.941116 | 0.003546  | <a href="#">DITFPPGSVEATQPVLK</a>   |
| 3.2   | 1829.949173 | -0.004511 | <a href="#">TMCLQRLQPVPQPTTK</a>    |
| 3.2   | 1829.931183 | 0.013479  | <a href="#">EPAPLDKYQPPPPPPR</a>    |
| 0.3   | 1829.931183 | 0.013479  | <a href="#">EPAPLDKYQPPPPPPR</a>    |
| 0.3   | 1829.942429 | 0.002233  | <a href="#">THPIEVFEPGAEHIVR</a>    |

# MASCOT SCIENCE Mascot Search Results

## Peptide View

### MS/MS Fragmentation of EALTYDGALLGDR

Found in **IF4H\_HUMAN**, Eukaryotic translation initiation factor 4H OS=Homo sapiens GN=EIF4H PE=1 SV=5

Match to Query 46529: 1392.685788 from(697.350170,2+) rtinseconds(2657) index(35719)

Title: Locus:1.1.1.1401.32

Data file 2012-01-27 - TFD - Epitel - IEC - 10ul - 1.mgf

Click mouse within plot area to zoom in by factor of two about that point

Or, Plot from  to  Da

Label all possible matches  Label matches used for scoring

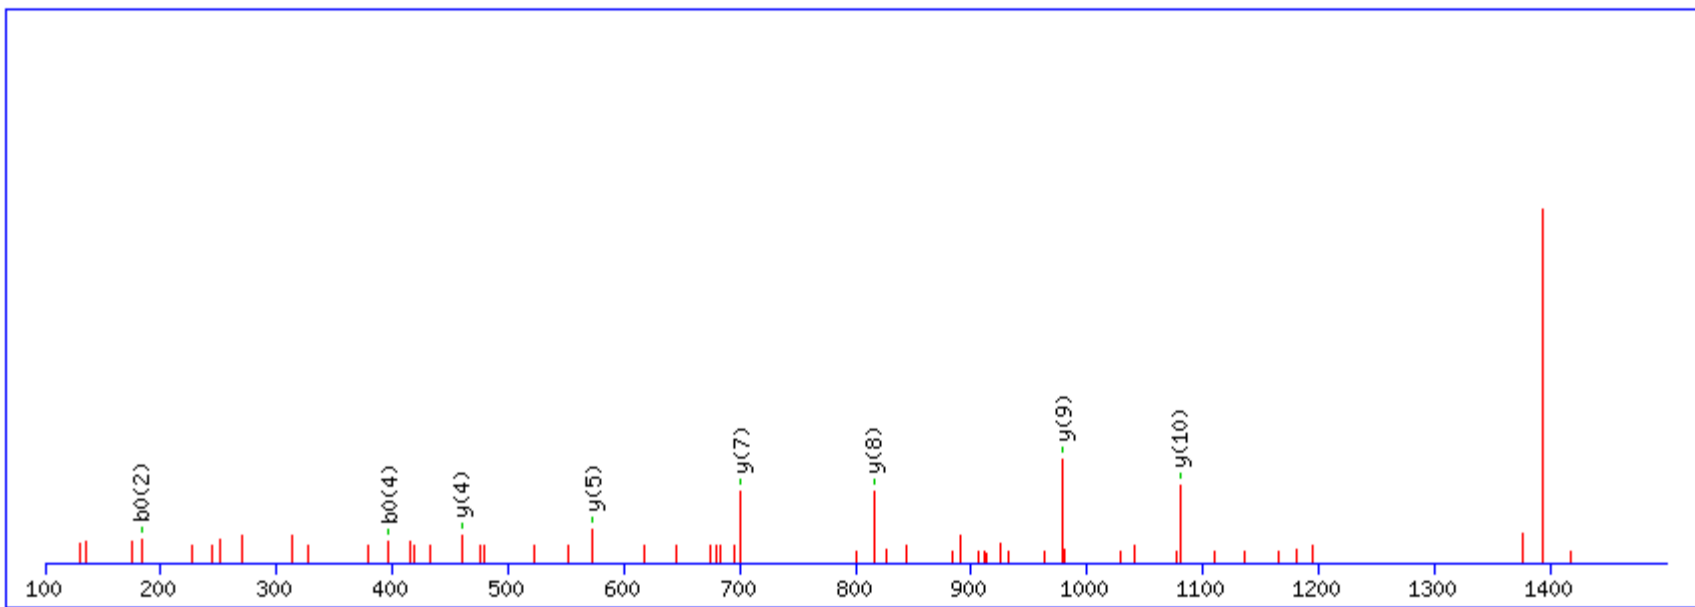

Monoisotopic mass of neutral peptide  $M_r(\text{calc})$ : 1392.688492

Fixed modifications: Carbamidomethyl (C) (apply to specified residues or termini only)

Ions Score: 39 Expect: 0.002

Matches : 8/118 fragment ions using 12 most intense peaks ([help](#))

| #  | b           | b <sup>++</sup> | b <sup>0</sup> | b <sup>0++</sup> | Seq. | y           | y <sup>++</sup> | y <sup>*</sup> | y <sup>*++</sup> | y <sup>0</sup> | y <sup>0++</sup> | #  |
|----|-------------|-----------------|----------------|------------------|------|-------------|-----------------|----------------|------------------|----------------|------------------|----|
| 1  | 130.049869  | 65.528572       | 112.039304     | 56.523290        | E    |             |                 |                |                  |                |                  | 13 |
| 2  | 201.086983  | 101.047130      | 183.076418     | 92.041847        | A    | 1264.653194 | 632.830235      | 1247.626645    | 624.316961       | 1246.642629    | 623.824953       | 12 |
| 3  | 314.171047  | 157.589161      | 296.160482     | 148.583879       | L    | 1193.616080 | 597.311678      | 1176.589531    | 588.798404       | 1175.605515    | 588.306396       | 11 |
| 4  | 415.218726  | 208.113001      | 397.208161     | 199.107719       | T    | 1080.532016 | 540.769646      | 1063.505467    | 532.256372       | 1062.521451    | 531.764364       | 10 |
| 5  | 578.282055  | 289.644666      | 560.271490     | 280.639383       | Y    | 979.484337  | 490.245807      | 962.457788     | 481.732532       | 961.473772     | 481.240524       | 9  |
| 6  | 693.308998  | 347.158137      | 675.298433     | 338.152855       | D    | 816.421008  | 408.714142      | 799.394459     | 400.200868       | 798.410443     | 399.708860       | 8  |
| 7  | 750.330462  | 375.668869      | 732.319897     | 366.663587       | G    | 701.394065  | 351.200671      | 684.367516     | 342.687396       | 683.383500     | 342.195388       | 7  |
| 8  | 821.367576  | 411.187426      | 803.357011     | 402.182144       | A    | 644.372601  | 322.689939      | 627.346052     | 314.176664       | 626.362036     | 313.684656       | 6  |
| 9  | 934.451640  | 467.729458      | 916.441075     | 458.724176       | L    | 573.335487  | 287.171382      | 556.308938     | 278.658107       | 555.324922     | 278.166099       | 5  |
| 10 | 1047.535704 | 524.271490      | 1029.525139    | 515.266208       | L    | 460.251423  | 230.629349      | 443.224874     | 222.116075       | 442.240858     | 221.624067       | 4  |
| 11 | 1104.557168 | 552.782222      | 1086.546603    | 543.776940       | G    | 347.167359  | 174.087317      | 330.140810     | 165.574043       | 329.156794     | 165.082035       | 3  |
| 12 | 1219.584111 | 610.295694      | 1201.573546    | 601.290411       | D    | 290.145895  | 145.576585      | 273.119346     | 137.063311       | 272.135330     | 136.571303       | 2  |
| 13 |             |                 |                |                  | R    | 175.118952  | 88.063114       | 158.092403     | 79.549839        |                |                  | 1  |

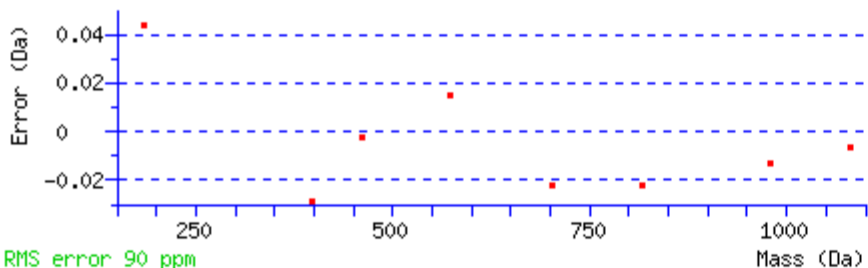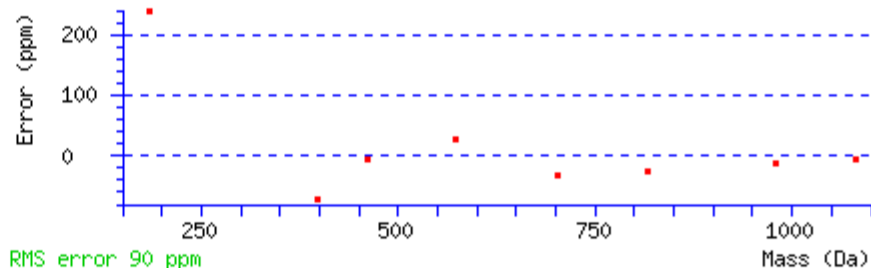

### NCBI BLAST search of EALTYDGALLGDR

(Parameters: blastp, nr protein database, expect=20000, no filter, PAM30)

Other BLAST [web gateways](#)

### All matches to this query

| Score | $M_r(\text{calc})$ : | Delta     | Sequence                      |
|-------|----------------------|-----------|-------------------------------|
| 38.9  | 1392.688492          | -0.002704 | <a href="#">EALTYDGALLGDR</a> |

Mascot: <http://www.matrixscience.com/>

**Peptide View**

MS/MS Fragmentation of **LKEGDTIIVPGVEGPVITQIR**

Found in **IF2P\_HUMAN**, Eukaryotic translation initiation factor 5B OS=Homo sapiens GN=EIF5B PE=1 SV=4

Match to Query 63438: 2233.265382 from(745.429070,3+) rtinseconds(3166) index(41156)

Title: Locus:1.1.1.2752.33

Data file 2011-11-12 - TFD - EP 5-1.mgf

Click mouse within plot area to zoom in by factor of two about that point

Or, Plot from  to  Da

Label all possible matches  Label matches used for scoring

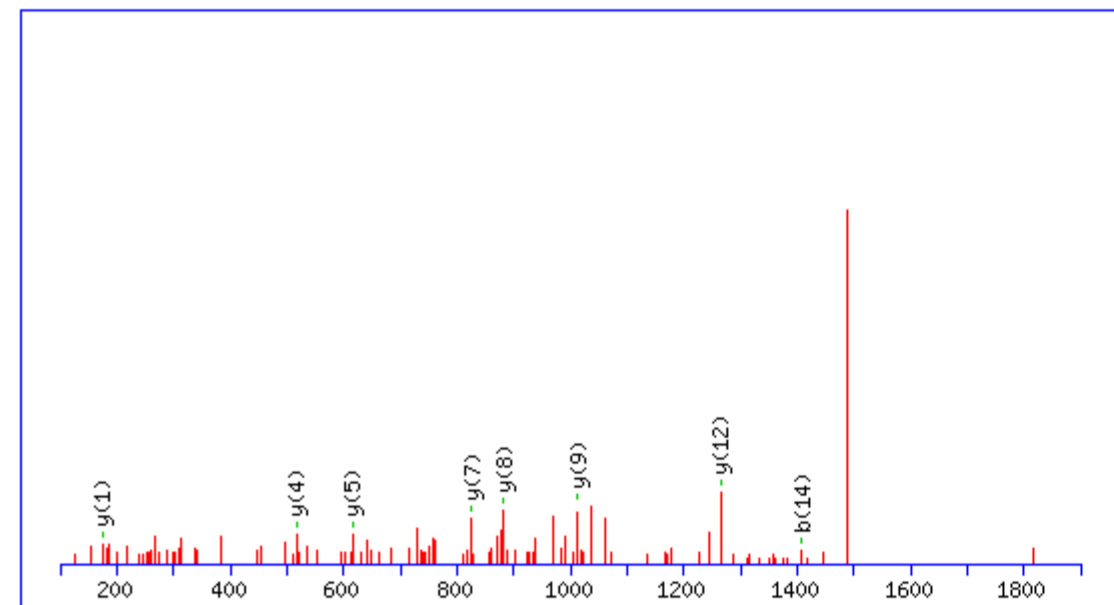

Monoisotopic mass of neutral peptide Mr(calc): 2233.268188

Fixed modifications: Propionamide (C) (apply to specified residues or termini only)

Ions Score: 31 Expect: 0.0018

Matches : 8/228 fragment ions using 15 most intense peaks [\(help\)](#)

| #  | b                  | b <sup>++</sup> | b <sup>*</sup> | b <sup>+++</sup> | b <sup>0</sup> | b <sup>0++</sup> | Seq. | y                  | y <sup>++</sup> | y <sup>*</sup> | y <sup>+++</sup> | y <sup>0</sup> | y <sup>0++</sup> | #  |
|----|--------------------|-----------------|----------------|------------------|----------------|------------------|------|--------------------|-----------------|----------------|------------------|----------------|------------------|----|
| 1  | 114.091340         | 57.549308       |                |                  |                |                  | L    |                    |                 |                |                  |                |                  | 21 |
| 2  | 242.186303         | 121.596790      | 225.159754     | 113.083515       |                |                  | K    | 2121.191398        | 1061.099337     | 2104.164849    | 1052.586062      | 2103.180833    | 1052.094054      | 20 |
| 3  | 371.228896         | 186.118086      | 354.202347     | 177.604812       | 353.218331     | 177.112804       | E    | 1993.096435        | 997.051855      | 1976.069886    | 988.538581       | 1975.085870    | 988.046573       | 19 |
| 4  | 428.250360         | 214.628818      | 411.223811     | 206.115544       | 410.239795     | 205.623536       | G    | 1864.053842        | 932.530559      | 1847.027293    | 924.017284       | 1846.043277    | 923.525276       | 18 |
| 5  | 543.277303         | 272.142290      | 526.250754     | 263.629015       | 525.266738     | 263.137007       | D    | 1807.032378        | 904.019827      | 1790.005829    | 895.506553       | 1789.021813    | 895.014544       | 17 |
| 6  | 644.324982         | 322.666129      | 627.298433     | 314.152855       | 626.314417     | 313.660847       | T    | 1692.005435        | 846.506355      | 1674.978886    | 837.993081       | 1673.994870    | 837.501073       | 16 |
| 7  | 757.409046         | 379.208161      | 740.382497     | 370.694887       | 739.398481     | 370.202879       | I    | 1590.957756        | 795.982516      | 1573.931207    | 787.469241       | 1572.947191    | 786.977233       | 15 |
| 8  | 870.493110         | 435.750193      | 853.466561     | 427.236919       | 852.482545     | 426.744911       | I    | 1477.873692        | 739.440484      | 1460.847143    | 730.927210       | 1459.863127    | 730.435201       | 14 |
| 9  | 969.561524         | 485.284400      | 952.534975     | 476.771126       | 951.550959     | 476.279118       | V    | 1364.789628        | 682.898452      | 1347.763079    | 674.385177       | 1346.779063    | 673.893169       | 13 |
| 10 | 1066.614288        | 533.810782      | 1049.587739    | 525.297508       | 1048.603723    | 524.805500       | P    | <b>1265.721214</b> | 633.364245      | 1248.694665    | 624.850971       | 1247.710649    | 624.358962       | 12 |
| 11 | 1123.635752        | 562.321514      | 1106.609203    | 553.808240       | 1105.625187    | 553.316231       | G    | 1168.668450        | 584.837863      | 1151.641901    | 576.324589       | 1150.657885    | 575.832580       | 11 |
| 12 | 1222.704166        | 611.855721      | 1205.677617    | 603.342447       | 1204.693601    | 602.850439       | V    | 1111.646986        | 556.327131      | 1094.620437    | 547.813857       | 1093.636421    | 547.321848       | 10 |
| 13 | 1351.746759        | 676.377017      | 1334.720210    | 667.863743       | 1333.736194    | 667.371735       | E    | <b>1012.578572</b> | 506.792924      | 995.552023     | 498.279649       | 994.568007     | 497.787641       | 9  |
| 14 | <b>1408.768223</b> | 704.887749      | 1391.741674    | 696.374475       | 1390.757658    | 695.882467       | G    | <b>883.535979</b>  | 442.271628      | 866.509430     | 433.758353       | 865.525414     | 433.266345       | 8  |
| 15 | 1505.820987        | 753.414131      | 1488.794438    | 744.900857       | 1487.810422    | 744.408849       | P    | <b>826.514515</b>  | 413.760896      | 809.487966     | 405.247621       | 808.503950     | 404.755613       | 7  |
| 16 | 1618.905051        | 809.956163      | 1601.878502    | 801.442889       | 1600.894486    | 800.950881       | I    | 729.461751         | 365.234514      | 712.435202     | 356.721239       | 711.451186     | 356.229231       | 6  |
| 17 | 1717.973465        | 859.490370      | 1700.946916    | 850.977096       | 1699.962900    | 850.485088       | V    | <b>616.377687</b>  | 308.692482      | 599.351138     | 300.179207       | 598.367122     | 299.687199       | 5  |
| 18 | 1819.021144        | 910.014210      | 1801.994595    | 901.500935       | 1801.010579    | 901.008927       | T    | <b>517.309273</b>  | 259.158275      | 500.282724     | 250.645000       | 499.298708     | 250.152992       | 4  |
| 19 | 1947.079722        | 974.043499      | 1930.053173    | 965.530224       | 1929.069157    | 965.038216       | Q    | 416.261594         | 208.634435      | 399.235045     | 200.121160       |                |                  | 3  |
| 20 | 2060.163786        | 1030.585531     | 2043.137237    | 1022.072256      | 2042.153221    | 1021.580248      | I    | 288.203016         | 144.605146      | 271.176467     | 136.091872       |                |                  | 2  |
| 21 |                    |                 |                |                  |                |                  | R    | <b>175.118952</b>  | 88.063114       | 158.092403     | 79.549839        |                |                  | 1  |

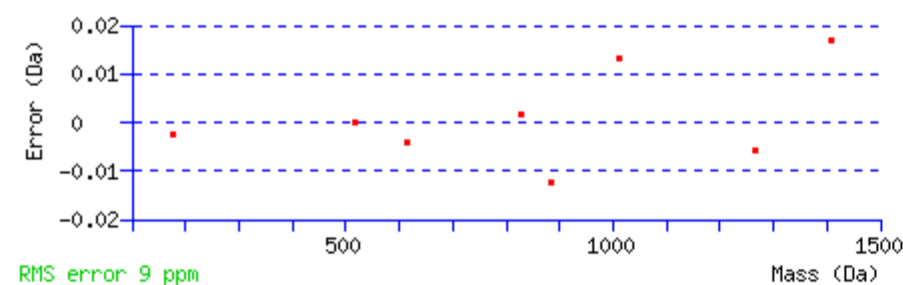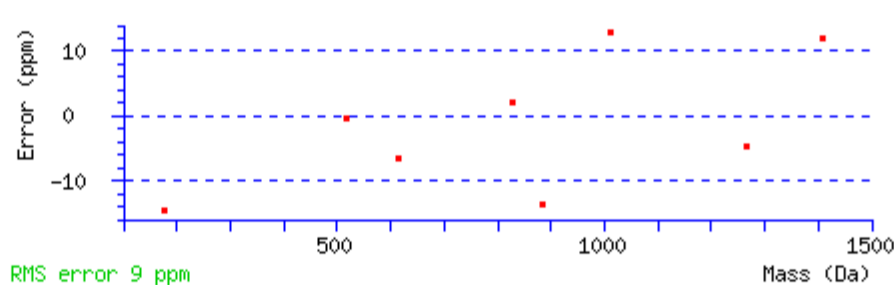

NCBI BLAST search of **LKEGDTIIVPGVEGPVITQIR**

(Parameters: blastp, nr protein database, expect=20000, no filter, PAM30)

Other BLAST [web gateways](#)

All matches to this query

| Score | Mr(calc):   | Delta     | Sequence                              |
|-------|-------------|-----------|---------------------------------------|
| 30.8  | 2233.268188 | -0.002806 | <a href="#">LKEGDTIIVPGVEGPVITQIR</a> |

# MASCOT SCIENCE Mascot Search Results

## Peptide View

MS/MS Fragmentation of **ETQDLIEQGALLQAHR**

Found in **EXOC3\_HUMAN**, Exocyst complex component 3 OS=Homo sapiens GN=EXOC3 PE=1 SV=2

Match to Query 56685: 1820.933892 from(607.985240,3+) rtinseconds(2567) index(29723)

Title: Locus:1.1.1.2617.26

Data file 2011-11-12 - TFD - EP 5-2.mgf

Click mouse within plot area to zoom in by factor of two about that point

Or, Plot from  to  Da

Label all possible matches  Label matches used for scoring

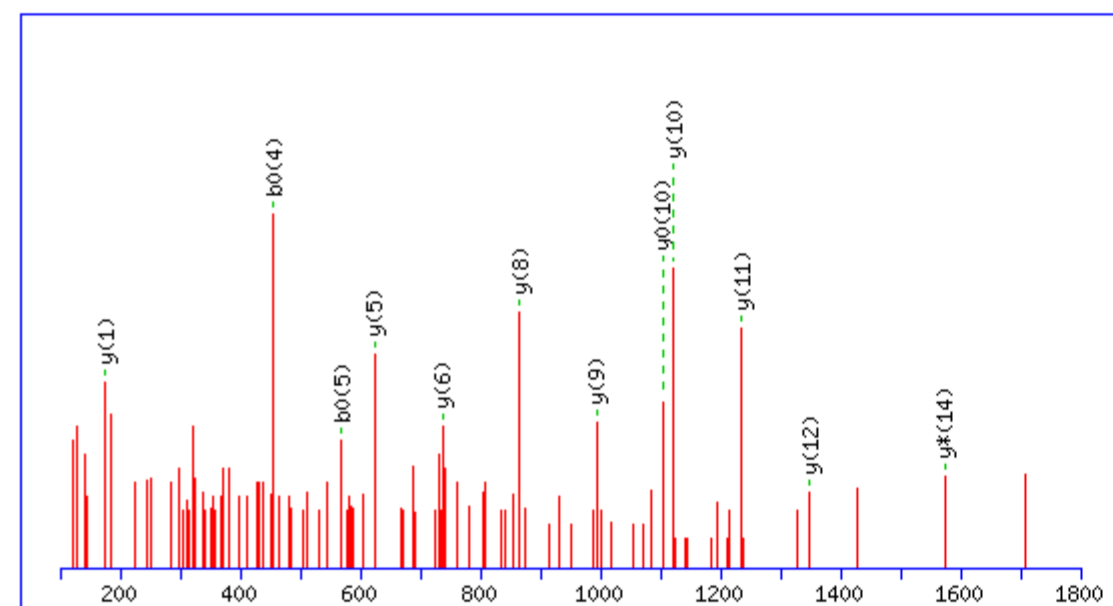

Monoisotopic mass of neutral peptide Mr(calc): 1820.938049

Fixed modifications: Propionamide (C) (apply to specified residues or termini only)

Ions Score: 52 Expect: 6.4e-005

Matches : 12/158 fragment ions using 16 most intense peaks [\(help\)](#)

| #  | b           | b <sup>++</sup> | b <sup>*</sup> | b <sup>*++</sup> | b <sup>0</sup> | b <sup>0++</sup> | Seq. | y           | y <sup>++</sup> | y <sup>*</sup> | y <sup>*++</sup> | y <sup>0</sup> | y <sup>0++</sup> | #  |
|----|-------------|-----------------|----------------|------------------|----------------|------------------|------|-------------|-----------------|----------------|------------------|----------------|------------------|----|
| 1  | 130.049869  | 65.528572       |                |                  | 112.039304     | 56.523290        | E    |             |                 |                |                  |                |                  | 16 |
| 2  | 231.097548  | 116.052412      |                |                  | 213.086983     | 107.047130       | T    | 1692.902761 | 846.955019      | 1675.876212    | 838.441744       | 1674.892196    | 837.949736       | 15 |
| 3  | 359.156126  | 180.081701      | 342.129577     | 171.568427       | 341.145561     | 171.076419       | Q    | 1591.855082 | 796.431179      | 1574.828533    | 787.917904       | 1573.844517    | 787.425896       | 14 |
| 4  | 474.183069  | 237.595173      | 457.156520     | 229.081898       | 456.172504     | 228.589890       | D    | 1463.796504 | 732.401890      | 1446.769955    | 723.888616       | 1445.785939    | 723.396607       | 13 |
| 5  | 587.267133  | 294.137205      | 570.240584     | 285.623930       | 569.256568     | 285.131922       | L    | 1348.769561 | 674.888418      | 1331.743012    | 666.375144       | 1330.758996    | 665.883136       | 12 |
| 6  | 700.351197  | 350.679237      | 683.324648     | 342.165962       | 682.340632     | 341.673954       | I    | 1235.685497 | 618.346386      | 1218.658948    | 609.833112       | 1217.674932    | 609.341104       | 11 |
| 7  | 829.393790  | 415.200533      | 812.367241     | 406.687259       | 811.383225     | 406.195251       | E    | 1122.601433 | 561.804355      | 1105.574884    | 553.291080       | 1104.590868    | 552.799072       | 10 |
| 8  | 957.452368  | 479.229822      | 940.425819     | 470.716548       | 939.441803     | 470.224540       | Q    | 993.558840  | 497.283058      | 976.532291     | 488.769783       |                |                  | 9  |
| 9  | 1014.473832 | 507.740554      | 997.447283     | 499.227280       | 996.463267     | 498.735272       | G    | 865.500262  | 433.253769      | 848.473713     | 424.740494       |                |                  | 8  |
| 10 | 1085.510946 | 543.259111      | 1068.484397    | 534.745837       | 1067.500381    | 534.253829       | A    | 808.478798  | 404.743037      | 791.452249     | 396.229762       |                |                  | 7  |
| 11 | 1198.595010 | 599.801143      | 1181.568461    | 591.287869       | 1180.584445    | 590.795861       | L    | 737.441684  | 369.224480      | 720.415135     | 360.711205       |                |                  | 6  |
| 12 | 1311.679074 | 656.343175      | 1294.652525    | 647.829901       | 1293.668509    | 647.337892       | L    | 624.357620  | 312.682448      | 607.331071     | 304.169174       |                |                  | 5  |
| 13 | 1439.737652 | 720.372464      | 1422.711103    | 711.859190       | 1421.727087    | 711.367182       | Q    | 511.273556  | 256.140416      | 494.247007     | 247.627141       |                |                  | 4  |
| 14 | 1510.774766 | 755.891021      | 1493.748217    | 747.377747       | 1492.764201    | 746.885739       | A    | 383.214978  | 192.111127      | 366.188429     | 183.597852       |                |                  | 3  |
| 15 | 1647.833678 | 824.420477      | 1630.807129    | 815.907203       | 1629.823113    | 815.415194       | H    | 312.177864  | 156.592570      | 295.151315     | 148.079295       |                |                  | 2  |
| 16 |             |                 |                |                  |                |                  | R    | 175.118952  | 88.063114       | 158.092403     | 79.549839        |                |                  | 1  |

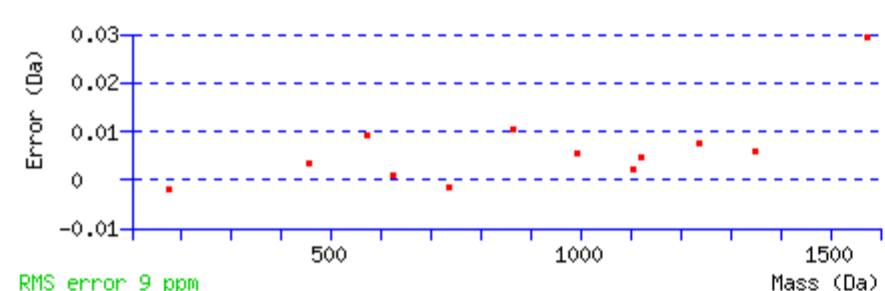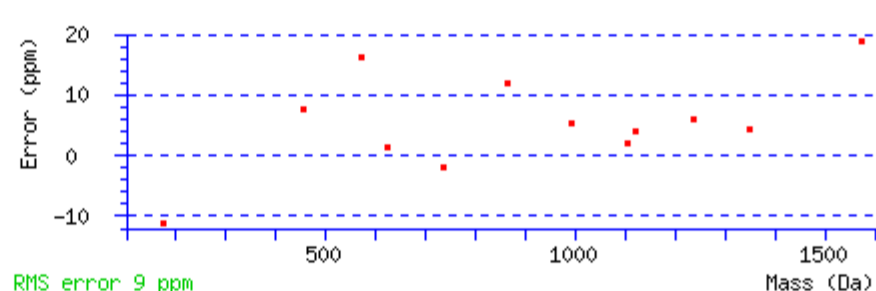

NCBI BLAST search of **ETQDLIEQGALLQAHR**

(Parameters: blastp, nr protein database, expect=20000, no filter, PAM30)

Other BLAST [web gateways](#)

All matches to this query

| Score | Mr(calc):   | Delta     | Sequence                         |
|-------|-------------|-----------|----------------------------------|
| 51.8  | 1820.938049 | -0.004157 | <a href="#">ETQDLIEQGALLQAHR</a> |
| 6.7   | 1820.920288 | 0.013604  | <a href="#">HSGKLEPMEATAHLLR</a> |
| 1.9   | 1820.920303 | 0.013589  | <a href="#">LSVLSSGCRYQEGPVR</a> |

Mascot: <http://www.matrixscience.com/>

# Mascot Search Results

## Peptide View

MS/MS Fragmentation of **SELIQLVAVTQK**

Found in **EXOC7\_HUMAN**, Exocyst complex component 7 OS=Homo sapiens GN=EXOC7 PE=1 SV=3

Match to Query 35730: 1327.778528 from(664.896540,2+) rtinseconds(2961) index(37073)

Title: Locus:1.1.1.2764.26

Data file 2011-11-12 - TFD - EP 5-2.mgf

Click mouse within plot area to zoom in by factor of two about that point

Or, Plot from  to  Da

Label all possible matches  Label matches used for scoring

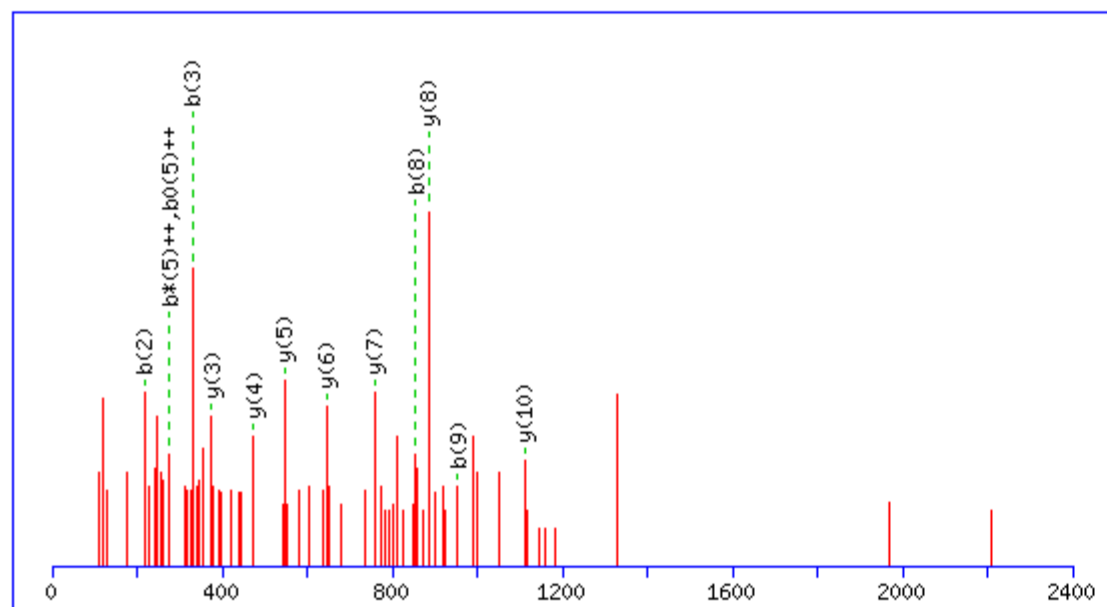

Monoisotopic mass of neutral peptide Mr(calc): 1327.771103

Fixed modifications: Propionamide (C) (apply to specified residues or termini only)

Ions Score: 31 Expect: 0.0017

Matches : 13/120 fragment ions using 31 most intense peaks [\(help\)](#)

| #  | b                 | b <sup>++</sup> | b <sup>*</sup> | b <sup>+++</sup>  | b <sup>0</sup> | b <sup>0++</sup>  | Seq. | y                  | y <sup>++</sup> | y <sup>*</sup> | y <sup>+++</sup> | y <sup>0</sup> | y <sup>0++</sup> | #  |
|----|-------------------|-----------------|----------------|-------------------|----------------|-------------------|------|--------------------|-----------------|----------------|------------------|----------------|------------------|----|
| 1  | 88.039304         | 44.523290       |                |                   | 70.028739      | 35.518008         | S    |                    |                 |                |                  |                |                  | 12 |
| 2  | <b>217.081897</b> | 109.044586      |                |                   | 199.071332     | 100.039304        | E    | 1241.746366        | 621.376821      | 1224.719817    | 612.863547       | 1223.735801    | 612.371539       | 11 |
| 3  | <b>330.165961</b> | 165.586618      |                |                   | 312.155396     | 156.581336        | L    | <b>1112.703773</b> | 556.855525      | 1095.677224    | 548.342250       | 1094.693208    | 547.850242       | 10 |
| 4  | 443.250025        | 222.128650      |                |                   | 425.239460     | 213.123368        | I    | 999.619709         | 500.313493      | 982.593160     | 491.800218       | 981.609144     | 491.308210       | 9  |
| 5  | 571.308603        | 286.157940      | 554.282054     | <b>277.644665</b> | 553.298038     | <b>277.152657</b> | Q    | <b>886.535645</b>  | 443.771461      | 869.509096     | 435.258186       | 868.525080     | 434.766178       | 8  |
| 6  | 684.392667        | 342.699972      | 667.366118     | 334.186697        | 666.382102     | 333.694689        | L    | <b>758.477067</b>  | 379.742172      | 741.450518     | 371.228897       | 740.466502     | 370.736889       | 7  |
| 7  | 783.461081        | 392.234179      | 766.434532     | 383.720904        | 765.450516     | 383.228896        | V    | <b>645.393003</b>  | 323.200140      | 628.366454     | 314.686865       | 627.382438     | 314.194857       | 6  |
| 8  | <b>854.498195</b> | 427.752736      | 837.471646     | 419.239461        | 836.487630     | 418.747453        | A    | <b>546.324589</b>  | 273.665933      | 529.298040     | 265.152658       | 528.314024     | 264.660650       | 5  |
| 9  | <b>953.566609</b> | 477.286943      | 936.540060     | 468.773668        | 935.556044     | 468.281660        | V    | <b>475.287475</b>  | 238.147376      | 458.260926     | 229.634101       | 457.276910     | 229.142093       | 4  |
| 10 | 1054.614288       | 527.810782      | 1037.587739    | 519.297508        | 1036.603723    | 518.805500        | T    | <b>376.219061</b>  | 188.613169      | 359.192512     | 180.099894       | 358.208496     | 179.607886       | 3  |
| 11 | 1182.672866       | 591.840071      | 1165.646317    | 583.326797        | 1164.662301    | 582.834789        | Q    | 275.171382         | 138.089329      | 258.144833     | 129.576055       |                |                  | 2  |
| 12 |                   |                 |                |                   |                |                   | K    | 147.112804         | 74.060040       | 130.086255     | 65.546765        |                |                  | 1  |

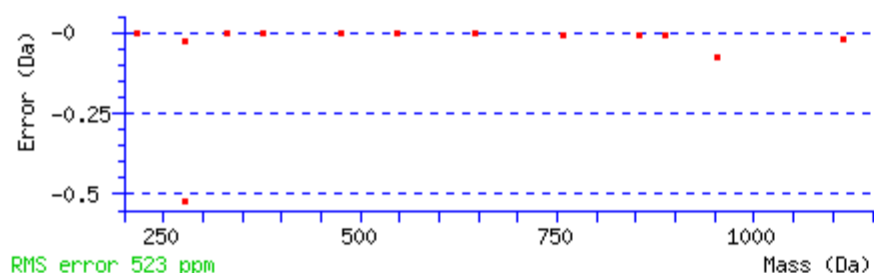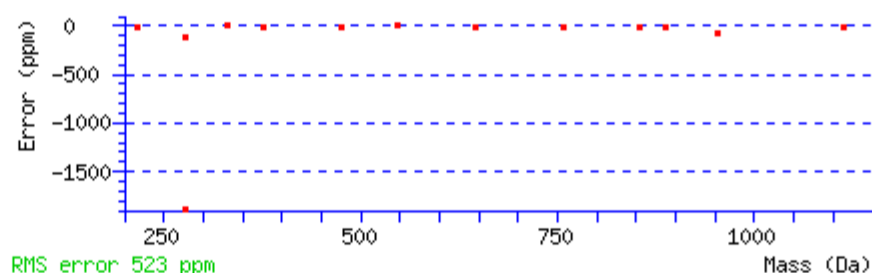

NCBI BLAST search of **SELIQLVAVTQK**

(Parameters: blastp, nr protein database, expect=20000, no filter, PAM30)

Other BLAST [web gateways](#)

All matches to this query

| Score | Mr(calc):   | Delta    | Sequence                     |
|-------|-------------|----------|------------------------------|
| 31.2  | 1327.771103 | 0.007425 | <a href="#">SELIQLVAVTQK</a> |

Mascot: <http://www.matrixscience.com/>

# MASCOT SCIENCE Mascot Search Results

## Peptide View

MS/MS Fragmentation of **GGGPAGAGGEAPAALR**

Found in **EXOS6\_HUMAN**, Exosome complex component MTR3 OS=Homo sapiens GN=EXOSC6 PE=1 SV=1

Match to Query 648753: 1307.658048 from(654.836300,2+) rtinseconds(1545) index(254008)

Title: Locus:1.1.1.1034.31

Data file C:\Program Files (x86)\Matrix Science\Mascot Daemon\mgf3 TFD - Epitel - R2\mascot\_daemon\_merge.mgf

Click mouse within plot area to zoom in by factor of two about that point

Or, Plot from  to  Da

Label all possible matches  Label matches used for scoring

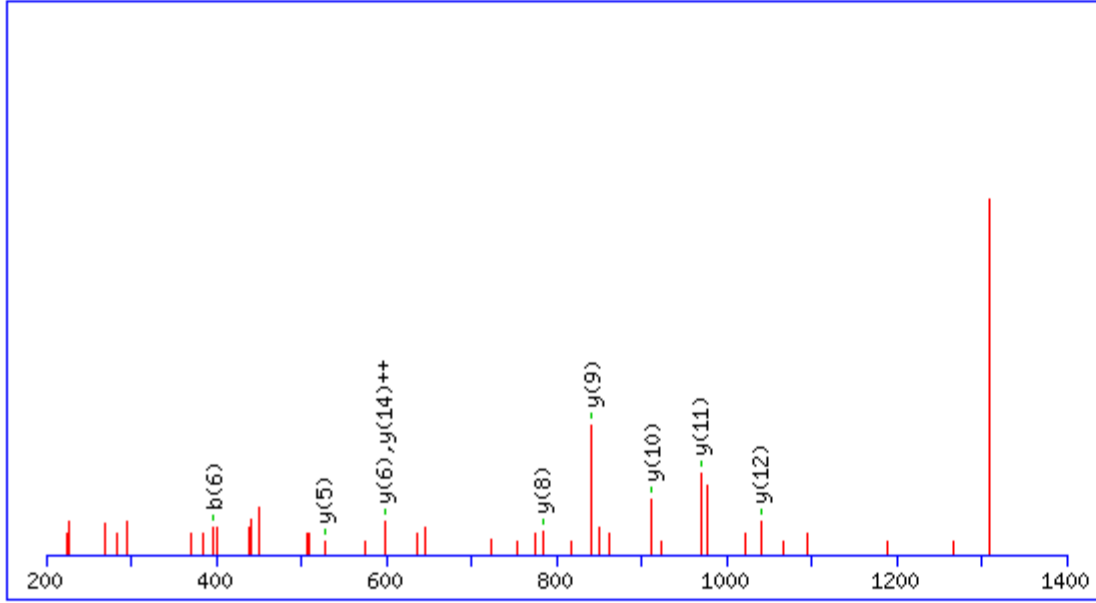

Monoisotopic mass of neutral peptide Mr(calc): 1307.658203

Fixed modifications: Carbamidomethyl (C) (apply to specified residues or termini only)

Ions Score: 33 Expect: 0.0025

Matches : 9/120 fragment ions using 20 most intense peaks ([help](#))

| #  | b                 | b <sup>++</sup> | b <sup>0</sup> | b <sup>0++</sup> | Seq. | y                  | y <sup>++</sup>   | y <sup>*</sup> | y <sup>++</sup> | y <sup>0</sup> | y <sup>0++</sup> | #  |
|----|-------------------|-----------------|----------------|------------------|------|--------------------|-------------------|----------------|-----------------|----------------|------------------|----|
| 1  | 58.028740         | 29.518008       |                |                  | G    |                    |                   |                |                 |                |                  | 16 |
| 2  | 115.050204        | 58.028740       |                |                  | G    | 1251.644027        | 626.325652        | 1234.617478    | 617.812377      | 1233.633462    | 617.320369       | 15 |
| 3  | 172.071668        | 86.539472       |                |                  | G    | 1194.622563        | <b>597.814919</b> | 1177.596014    | 589.301645      | 1176.611998    | 588.809637       | 14 |
| 4  | 269.124432        | 135.065854      |                |                  | P    | 1137.601099        | 569.304188        | 1120.574550    | 560.790913      | 1119.590534    | 560.298905       | 13 |
| 5  | 340.161546        | 170.584411      |                |                  | A    | <b>1040.548335</b> | 520.777806        | 1023.521786    | 512.264531      | 1022.537770    | 511.772523       | 12 |
| 6  | <b>397.183010</b> | 199.095143      |                |                  | G    | <b>969.511221</b>  | 485.259249        | 952.484672     | 476.745974      | 951.500656     | 476.253966       | 11 |
| 7  | 468.220124        | 234.613700      |                |                  | A    | <b>912.489757</b>  | 456.748517        | 895.463208     | 448.235242      | 894.479192     | 447.743234       | 10 |
| 8  | 525.241588        | 263.124432      |                |                  | G    | <b>841.452643</b>  | 421.229960        | 824.426094     | 412.716685      | 823.442078     | 412.224677       | 9  |
| 9  | 582.263052        | 291.635164      |                |                  | G    | <b>784.431179</b>  | 392.719227        | 767.404630     | 384.205953      | 766.420614     | 383.713945       | 8  |
| 10 | 711.305645        | 356.156461      | 693.295080     | 347.151178       | E    | 727.409715         | 364.208495        | 710.383166     | 355.695221      | 709.399150     | 355.203213       | 7  |
| 11 | 782.342759        | 391.675018      | 764.332194     | 382.669735       | A    | <b>598.367122</b>  | 299.687199        | 581.340573     | 291.173924      |                |                  | 6  |
| 12 | 879.395523        | 440.201400      | 861.384958     | 431.196117       | P    | <b>527.330008</b>  | 264.168642        | 510.303459     | 255.655367      |                |                  | 5  |
| 13 | 950.432637        | 475.719957      | 932.422072     | 466.714674       | A    | 430.277244         | 215.642260        | 413.250695     | 207.128985      |                |                  | 4  |
| 14 | 1021.469751       | 511.238514      | 1003.459186    | 502.233231       | A    | 359.240130         | 180.123703        | 342.213581     | 171.610428      |                |                  | 3  |
| 15 | 1134.553815       | 567.780546      | 1116.543250    | 558.775263       | L    | 288.203016         | 144.605146        | 271.176467     | 136.091871      |                |                  | 2  |
| 16 |                   |                 |                |                  | R    | 175.118952         | 88.063114         | 158.092403     | 79.549839       |                |                  | 1  |

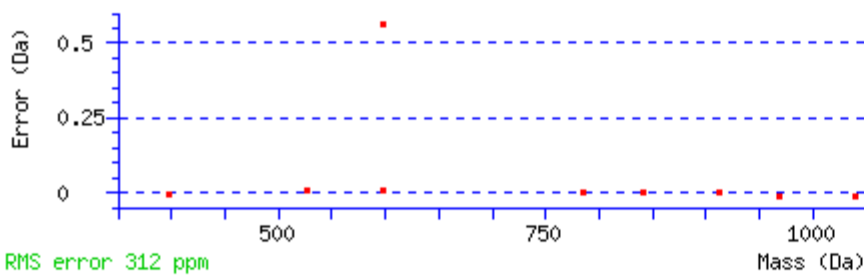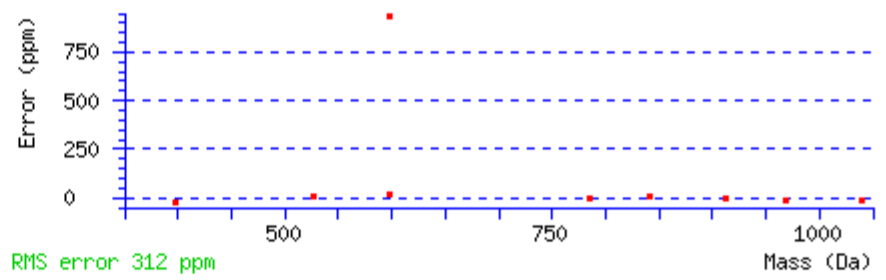

NCBI BLAST search of [GGGPAGAGGEAPAALR](#)

(Parameters: blastp, nr protein database, expect=20000, no filter, PAM30)

Other BLAST [web gateways](#)

All matches to this query

| Score | Mr(calc):   | Delta     | Sequence                         |
|-------|-------------|-----------|----------------------------------|
| 32.7  | 1307.658203 | -0.000155 | <a href="#">GGGPAGAGGEAPAALR</a> |

Mascot: <http://www.matrixscience.com/>

# MASCOT Search Results

## Peptide View

MS/MS Fragmentation of **VLEAAAQAAR**

Found in **EXOS4\_HUMAN**, Exosome complex component RRP41 OS=Homo sapiens GN=EXOSC4 PE=1 SV=3

Match to Query 16087: 998.548968 from(500.281760,2+) rtinseconds(1256) index(6820)

Title: Locus:1.1.1.1793.25

Data file 2011-11-10 - TFD - EP 4-5.mgf

Click mouse within plot area to zoom in by factor of two about that point

Or, Plot from  to  Da

Label all possible matches  Label matches used for scoring

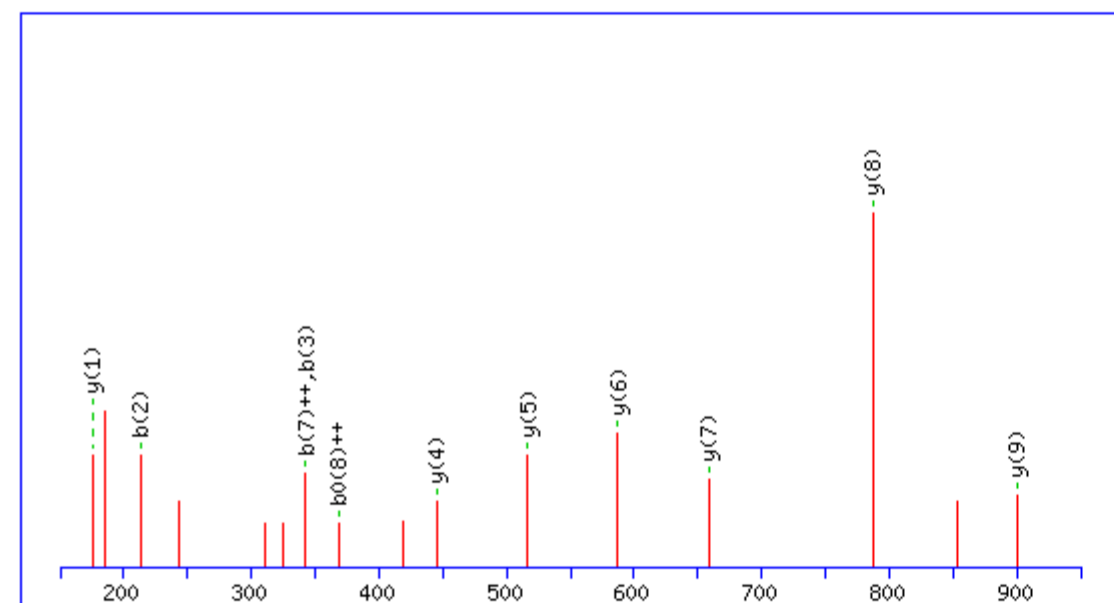

Monoisotopic mass of neutral peptide  $M_r(\text{calc})$ : 998.550858

Fixed modifications: Propionamide (C) (apply to specified residues or termini only)

Ions Score: 59 Expect: 1.5e-005

Matches : 11/78 fragment ions using 15 most intense peaks ([help](#))

| #  | b                 | b <sup>++</sup>   | b <sup>*</sup> | b <sup>*++</sup> | b <sup>0</sup> | b <sup>0++</sup>  | Seq. | y                 | y <sup>++</sup> | y <sup>*</sup> | y <sup>*++</sup> | y <sup>0</sup> | y <sup>0++</sup> | #  |
|----|-------------------|-------------------|----------------|------------------|----------------|-------------------|------|-------------------|-----------------|----------------|------------------|----------------|------------------|----|
| 1  | 100.075690        | 50.541483         |                |                  |                |                   | V    |                   |                 |                |                  |                |                  | 10 |
| 2  | <b>213.159754</b> | 107.083515        |                |                  |                |                   | L    | <b>900.489757</b> | 450.748516      | 883.463208     | 442.235242       | 882.479192     | 441.743234       | 9  |
| 3  | <b>342.202347</b> | 171.604811        |                |                  | 324.191782     | 162.599529        | E    | <b>787.405693</b> | 394.206484      | 770.379144     | 385.693210       | 769.395128     | 385.201202       | 8  |
| 4  | 413.239461        | 207.123368        |                |                  | 395.228896     | 198.118086        | A    | <b>658.363100</b> | 329.685188      | 641.336551     | 321.171913       |                |                  | 7  |
| 5  | 484.276575        | 242.641925        |                |                  | 466.266010     | 233.636643        | A    | <b>587.325986</b> | 294.166631      | 570.299437     | 285.653356       |                |                  | 6  |
| 6  | 555.313689        | 278.160483        |                |                  | 537.303124     | 269.155200        | A    | <b>516.288872</b> | 258.648074      | 499.262323     | 250.134799       |                |                  | 5  |
| 7  | 683.372267        | <b>342.189772</b> | 666.345718     | 333.676497       | 665.361702     | 333.184489        | Q    | <b>445.251758</b> | 223.129517      | 428.225209     | 214.616242       |                |                  | 4  |
| 8  | 754.409381        | 377.708328        | 737.382832     | 369.195054       | 736.398816     | <b>368.703046</b> | A    | 317.193180        | 159.100228      | 300.166631     | 150.586953       |                |                  | 3  |
| 9  | 825.446495        | 413.226885        | 808.419946     | 404.713611       | 807.435930     | 404.221603        | A    | 246.156066        | 123.581671      | 229.129517     | 115.068396       |                |                  | 2  |
| 10 |                   |                   |                |                  |                |                   | R    | <b>175.118952</b> | 88.063114       | 158.092403     | 79.549839        |                |                  | 1  |

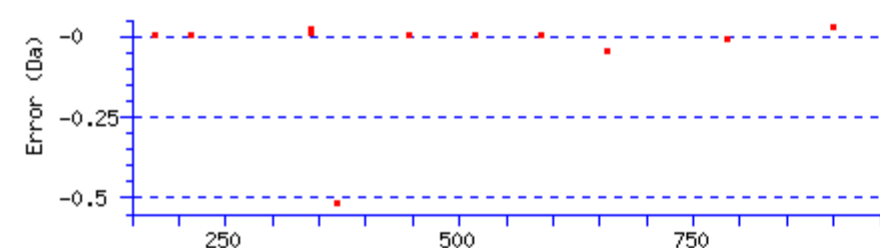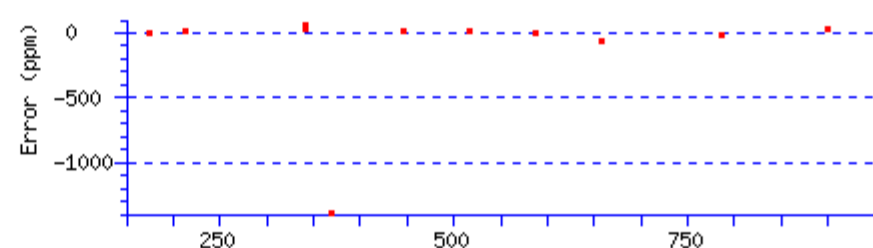

NCBI BLAST search of [VLEAAAQAAR](#)

(Parameters: blastp, nr protein database, expect=20000, no filter, PAM30)

Other BLAST [web gateways](#)

## All matches to this query

| Score | $M_r(\text{calc})$ | Delta     | Sequence                   |
|-------|--------------------|-----------|----------------------------|
| 58.8  | 998.550858         | -0.001890 | <a href="#">VLEAAAQAAR</a> |
| 29.7  | 998.539642         | 0.009326  | <a href="#">VPEAVALER</a>  |
| 10.2  | 998.539642         | 0.009326  | <a href="#">GLPEAAGKPK</a> |
| 9.5   | 998.539673         | 0.009295  | <a href="#">VPVPIGTER</a>  |
| 7.2   | 998.540970         | 0.007998  | <a href="#">KHIHEHAK</a>   |
| 7.0   | 998.547043         | 0.001925  | <a href="#">VLMPPDAIK</a>  |
| 5.9   | 998.550873         | -0.001905 | <a href="#">VPGNEARLK</a>  |
| 5.1   | 998.550873         | -0.001905 | <a href="#">QNVEALVAR</a>  |
| 4.8   | 998.547043         | 0.001925  | <a href="#">VLMPPDAIK</a>  |
| 4.8   | 998.547043         | 0.001925  | <a href="#">VLMPPDAIK</a>  |



# MASCOT SEARCH RESULTS

## Peptide View

MS/MS Fragmentation of **SILLTEQALAK**

Found in **LACRT\_HUMAN**, Extracellular glycoprotein lacritin OS=Homo sapiens GN=LACRT PE=1 SV=1

Match to Query 29262: 1185.694548 from(593.854550,2+) rtinseconds(2550) index(31462)

Title: Locus:1.1.1.2286.30

Data file 2011-11-10 - TFD - EP 4-5.mgf

Click mouse within plot area to zoom in by factor of two about that point

Or, Plot from  to  Da

Label all possible matches  Label matches used for scoring

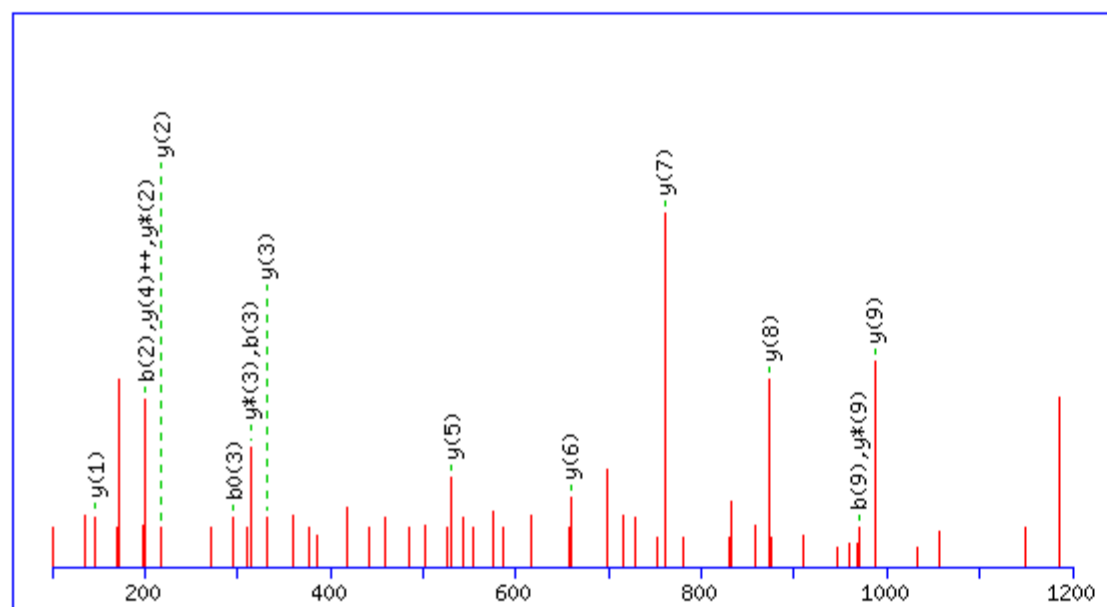

Monoisotopic mass of neutral peptide Mr(calc): 1185.696854

Fixed modifications: Propionamide (C) (apply to specified residues or termini only)

Ions Score: 47 Expect: 8.4e-005

Matches : 16/98 fragment ions using 30 most intense peaks [\(help\)](#)

| #  | b                 | b <sup>++</sup> | b <sup>*</sup> | b <sup>*++</sup> | b <sup>0</sup>    | b <sup>0++</sup> | Seq. | y                 | y <sup>++</sup>   | y <sup>*</sup>    | y <sup>*++</sup> | y <sup>0</sup> | y <sup>0++</sup> | #  |
|----|-------------------|-----------------|----------------|------------------|-------------------|------------------|------|-------------------|-------------------|-------------------|------------------|----------------|------------------|----|
| 1  | 88.039304         | 44.523290       |                |                  | 70.028739         | 35.518008        | S    |                   |                   |                   |                  |                |                  | 11 |
| 2  | <b>201.123368</b> | 101.065322      |                |                  | 183.112803        | 92.060039        | I    | 1099.672138       | 550.339707        | 1082.645589       | 541.826433       | 1081.661573    | 541.334425       | 10 |
| 3  | <b>314.207432</b> | 157.607354      |                |                  | <b>296.196867</b> | 148.602071       | L    | <b>986.588074</b> | 493.797675        | <b>969.561525</b> | 485.284401       | 968.577509     | 484.792393       | 9  |
| 4  | 427.291496        | 214.149386      |                |                  | 409.280931        | 205.144104       | L    | <b>873.504010</b> | 437.255643        | 856.477461        | 428.742369       | 855.493445     | 428.250361       | 8  |
| 5  | 528.339175        | 264.673226      |                |                  | 510.328610        | 255.667943       | T    | <b>760.419946</b> | 380.713611        | 743.393397        | 372.200337       | 742.409381     | 371.708329       | 7  |
| 6  | 657.381768        | 329.194522      |                |                  | 639.371203        | 320.189240       | E    | <b>659.372267</b> | 330.189772        | 642.345718        | 321.676497       | 641.361702     | 321.184489       | 6  |
| 7  | 785.440346        | 393.223811      | 768.413797     | 384.710537       | 767.429781        | 384.218529       | Q    | <b>530.329674</b> | 265.668475        | 513.303125        | 257.155201       |                |                  | 5  |
| 8  | 856.477460        | 428.742368      | 839.450911     | 420.229094       | 838.466895        | 419.737086       | A    | 402.271096        | <b>201.639186</b> | 385.244547        | 193.125912       |                |                  | 4  |
| 9  | <b>969.561524</b> | 485.284400      | 952.534975     | 476.771126       | 951.550959        | 476.279118       | L    | <b>331.233982</b> | 166.120629        | <b>314.207433</b> | 157.607355       |                |                  | 3  |
| 10 | 1040.598638       | 520.802957      | 1023.572089    | 512.289683       | 1022.588073       | 511.797675       | A    | <b>218.149918</b> | 109.578597        | <b>201.123369</b> | 101.065323       |                |                  | 2  |
| 11 |                   |                 |                |                  |                   |                  | K    | <b>147.112804</b> | 74.060040         | 130.086255        | 65.546765        |                |                  | 1  |

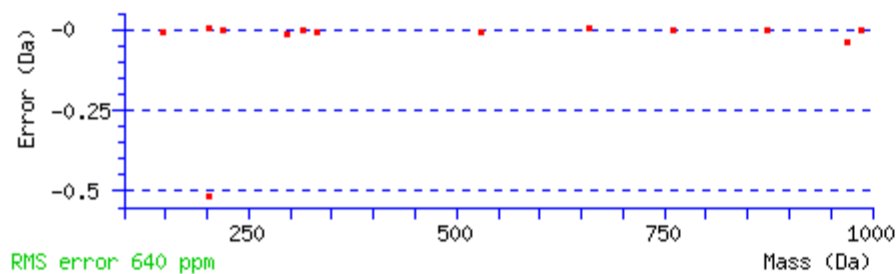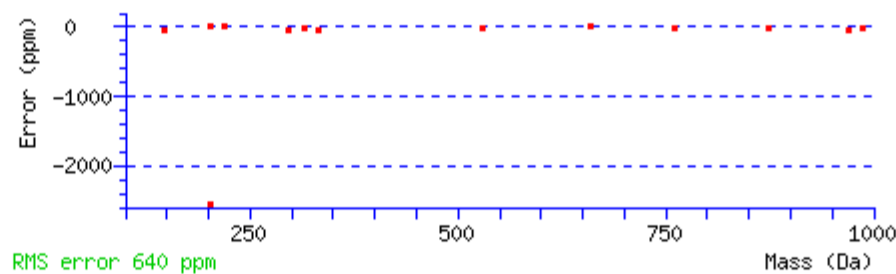

NCBI BLAST search of **SILLTEQALAK**

(Parameters: blastp, nr protein database, expect=20000, no filter, PAM30)

Other BLAST [web gateways](#)

## All matches to this query

| Score | Mr(calc):   | Delta     | Sequence                    |
|-------|-------------|-----------|-----------------------------|
| 46.9  | 1185.696854 | -0.002306 | <a href="#">SILLTEQALAK</a> |
| 9.5   | 1185.690338 | 0.004210  | <a href="#">LSLCGLLLQR</a>  |
| 2.8   | 1185.682968 | 0.011580  | <a href="#">TVLGIVSRGER</a> |

# MATRIX SCIENCE Mascot Search Results

## Peptide View

MS/MS Fragmentation of **NEGNIFPNPEATFVK**

Found in **SP16H\_HUMAN**, FACT complex subunit SPT16 OS=Homo sapiens GN=SUPT16H PE=1 SV=1

Match to Query 49354: 1675.830828 from(838.922690,2+) rtinseconds(3045) index(38921)

Title: Locus:1.1.1.2707.48

Data file 2011-11-12 - TFD - EP 5-1.mgf

Click mouse within plot area to zoom in by factor of two about that point

Or, Plot from  to  Da

Label all possible matches  Label matches used for scoring

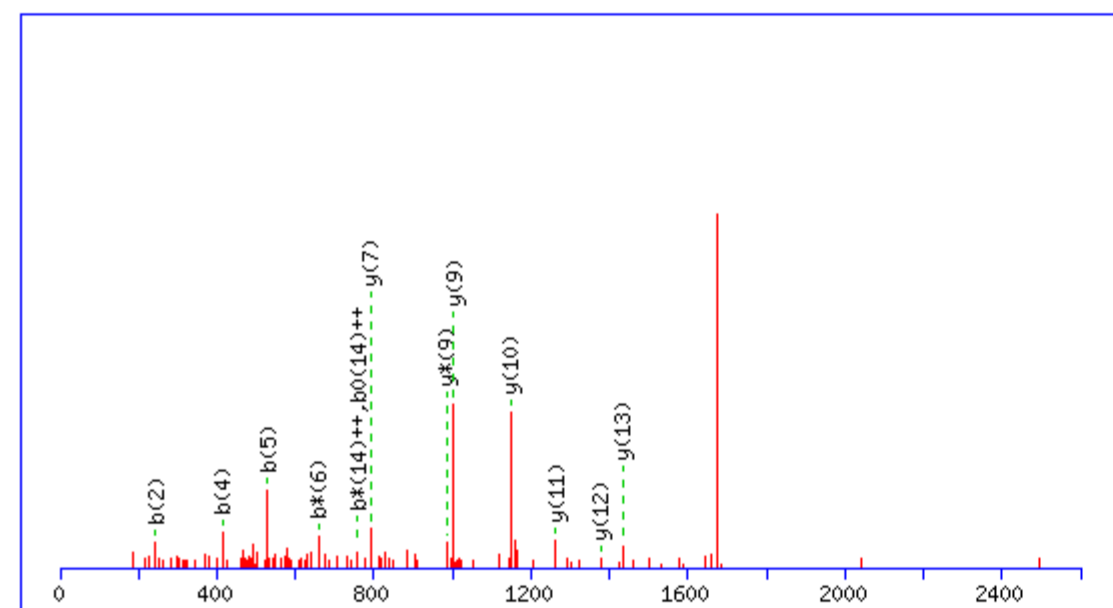

Monoisotopic mass of neutral peptide Mr(calc): 1675.820572

Fixed modifications: Propionamide (C) (apply to specified residues or termini only)

Ions Score: 47 Expect: 0.00026

Matches : 13/160 fragment ions using 15 most intense peaks [\(help\)](#)

| #  | b                 | b <sup>++</sup> | b <sup>*</sup>    | b <sup>***</sup>  | b <sup>0</sup> | b <sup>0++</sup>  | Seq. | y                  | y <sup>++</sup> | y <sup>*</sup>    | y <sup>***</sup> | y <sup>0</sup> | y <sup>0++</sup> | #  |
|----|-------------------|-----------------|-------------------|-------------------|----------------|-------------------|------|--------------------|-----------------|-------------------|------------------|----------------|------------------|----|
| 1  | 115.050203        | 58.028740       | 98.023654         | 49.515465         |                |                   | N    |                    |                 |                   |                  |                |                  | 15 |
| 2  | <b>244.092796</b> | 122.550036      | 227.066247        | 114.036762        | 226.082231     | 113.544754        | E    | 1562.784935        | 781.896106      | 1545.758386       | 773.382831       | 1544.774370    | 772.890823       | 14 |
| 3  | 301.114260        | 151.060768      | 284.087711        | 142.547494        | 283.103695     | 142.055486        | G    | <b>1433.742342</b> | 717.374809      | 1416.715793       | 708.861535       | 1415.731777    | 708.369527       | 13 |
| 4  | <b>415.157187</b> | 208.082232      | 398.130638        | 199.568957        | 397.146622     | 199.076949        | N    | <b>1376.720878</b> | 688.864077      | 1359.694329       | 680.350803       | 1358.710313    | 679.858795       | 12 |
| 5  | <b>528.241251</b> | 264.624264      | 511.214702        | 256.110989        | 510.230686     | 255.618981        | I    | <b>1262.677951</b> | 631.842614      | 1245.651402       | 623.329339       | 1244.667386    | 622.837331       | 11 |
| 6  | 675.309665        | 338.158471      | <b>658.283116</b> | 329.645196        | 657.299100     | 329.153188        | F    | <b>1149.593887</b> | 575.300582      | 1132.567338       | 566.787307       | 1131.583322    | 566.295299       | 10 |
| 7  | 772.362429        | 386.684853      | 755.335880        | 378.171578        | 754.351864     | 377.679570        | P    | <b>1002.525473</b> | 501.766375      | <b>985.498924</b> | 493.253100       | 984.514908     | 492.761092       | 9  |
| 8  | 886.405356        | 443.706316      | 869.378807        | 435.193041        | 868.394791     | 434.701033        | N    | 905.472709         | 453.239993      | 888.446160        | 444.726718       | 887.462144     | 444.234710       | 8  |
| 9  | 983.458120        | 492.232698      | 966.431571        | 483.719424        | 965.447555     | 483.227416        | P    | <b>791.429782</b>  | 396.218529      | 774.403233        | 387.705255       | 773.419217     | 387.213247       | 7  |
| 10 | 1112.500713       | 556.753995      | 1095.474164       | 548.240720        | 1094.490148    | 547.748712        | E    | 694.377018         | 347.692147      | 677.350469        | 339.178873       | 676.366453     | 338.686865       | 6  |
| 11 | 1183.537827       | 592.272552      | 1166.511278       | 583.759277        | 1165.527262    | 583.267269        | A    | 565.334425         | 283.170851      | 548.307876        | 274.657576       | 547.323860     | 274.165568       | 5  |
| 12 | 1284.585506       | 642.796391      | 1267.558957       | 634.283117        | 1266.574941    | 633.791109        | T    | 494.297311         | 247.652294      | 477.270762        | 239.139019       | 476.286746     | 238.647011       | 4  |
| 13 | 1431.653920       | 716.330598      | 1414.627371       | 707.817324        | 1413.643355    | 707.325316        | F    | 393.249632         | 197.128454      | 376.223083        | 188.615180       |                |                  | 3  |
| 14 | 1530.722334       | 765.864805      | 1513.695785       | <b>757.351531</b> | 1512.711769    | <b>756.859523</b> | V    | 246.181218         | 123.594247      | 229.154669        | 115.080973       |                |                  | 2  |
| 15 |                   |                 |                   |                   |                |                   | K    | 147.112804         | 74.060040       | 130.086255        | 65.546765        |                |                  | 1  |

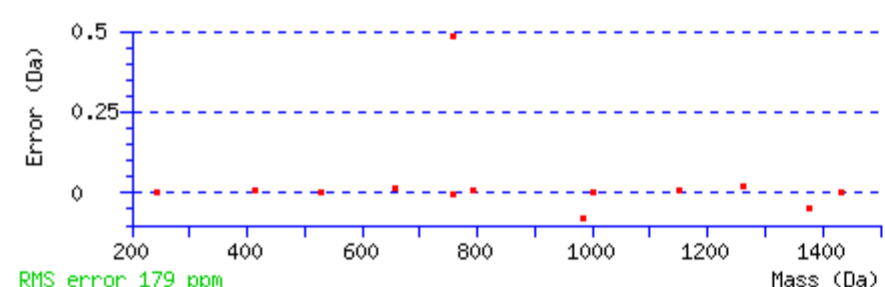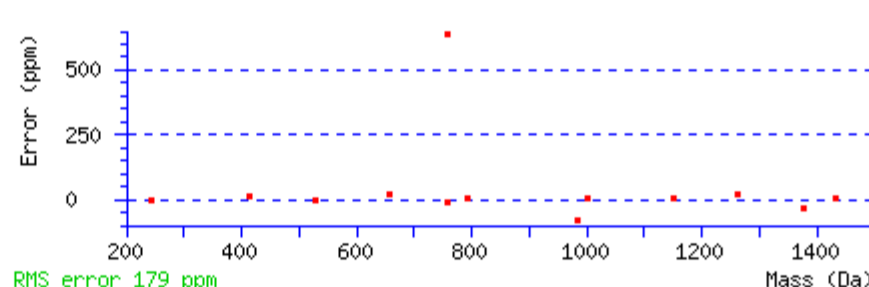

NCBI BLAST search of [NEGNIFPNPEATFVK](#)

(Parameters: blastp, nr protein database, expect=20000, no filter, PAM30)

Other BLAST [web gateways](#)

## All matches to this query

| Score | Mr(calc):   | Delta     | Sequence                         |
|-------|-------------|-----------|----------------------------------|
| 46.8  | 1675.820572 | 0.010256  | <a href="#">NEGNIFPNPEATFVK</a>  |
| 10.9  | 1675.826447 | 0.004381  | <a href="#">DLADLQGSDSVTKAEK</a> |
| 9.3   | 1675.838516 | -0.007688 | <a href="#">ISMAMQEGAASLSRPK</a> |
| 3.4   | 1675.845062 | -0.014234 | <a href="#">EEAVVMVEVNQSAKK</a>  |
| 2.6   | 1675.816574 | 0.014254  | <a href="#">DPPASAFQSAGITGVS</a> |

# MASCOT Search Results

## Peptide View

MS/MS Fragmentation of **FITHAPPGEFNEVFNDVR**

Found in **CAZAI\_HUMAN**, F-actin-capping protein subunit alpha-1 OS=Homo sapiens GN=CAPZA1 PE=1 SV=3

Match to Query 74267: 2087.991912 from(697.004580,3+) rtinseconds(2898) index(39491)

Title: Locus:1.1.1.1545.21

Data file 2012-01-27 - TFD - Epitel - IEC - 10ul - 3.mgf

Click mouse within plot area to zoom in by factor of two about that point

Or, Plot from  to  Da

Label all possible matches  Label matches used for scoring

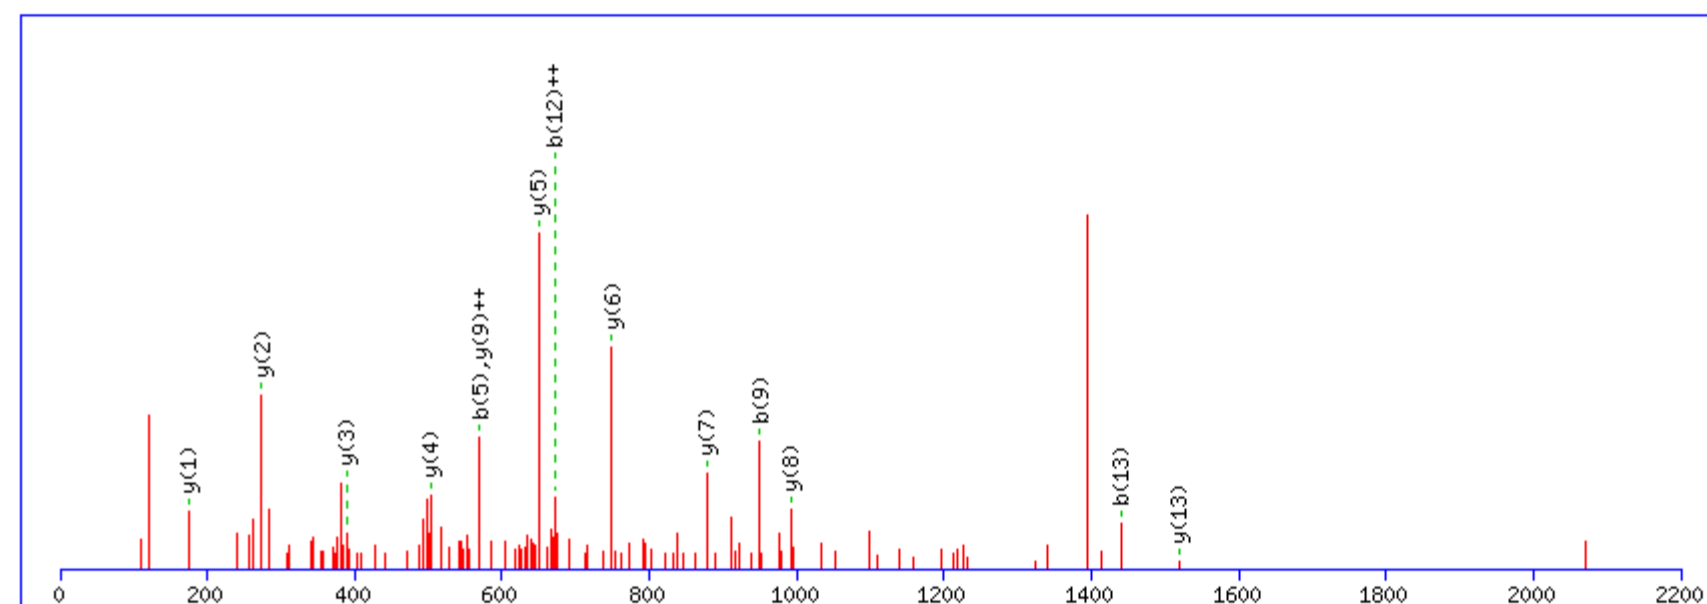

Monoisotopic mass of neutral peptide Mr(calc): 2088.006500

Fixed modifications: Carbamidomethyl (C) (apply to specified residues or termini only)

Ions Score: 43 Expect: 0.00021

Matches: 14/176 fragment ions using 30 most intense peaks [\(help\)](#)

| #  | b                  | b <sup>++</sup>   | b <sup>+</sup> | b <sup>+++</sup> | b <sup>0</sup> | b <sup>0++</sup> | Seq. | y                  | y <sup>++</sup>   | y <sup>+</sup> | y <sup>+++</sup> | y <sup>0</sup> | y <sup>0++</sup> | #  |
|----|--------------------|-------------------|----------------|------------------|----------------|------------------|------|--------------------|-------------------|----------------|------------------|----------------|------------------|----|
| 1  | 148.075690         | 74.541483         |                |                  |                |                  | F    |                    |                   |                |                  |                |                  | 18 |
| 2  | 261.159754         | 131.083515        |                |                  |                |                  | I    | 1941.945352        | 971.476314        | 1924.918803    | 962.963040       | 1923.934787    | 962.471032       | 17 |
| 3  | 362.207433         | 181.607354        |                |                  | 344.196868     | 172.602072       | T    | 1828.861288        | 914.934282        | 1811.834739    | 906.421008       | 1810.850723    | 905.929000       | 16 |
| 4  | 499.266345         | 250.136810        |                |                  | 481.255780     | 241.131528       | H    | 1727.813609        | 864.410443        | 1710.787060    | 855.897168       | 1709.803044    | 855.405160       | 15 |
| 5  | <b>570.303459</b>  | 285.655368        |                |                  | 552.292894     | 276.650085       | A    | 1590.754697        | 795.880987        | 1573.728148    | 787.367712       | 1572.744132    | 786.875704       | 14 |
| 6  | 667.356223         | 334.181750        |                |                  | 649.345658     | 325.176467       | P    | <b>1519.717583</b> | 760.362430        | 1502.691034    | 751.849155       | 1501.707018    | 751.357147       | 13 |
| 7  | 764.408987         | 382.708132        |                |                  | 746.398422     | 373.702849       | P    | 1422.664819        | 711.836048        | 1405.638270    | 703.322773       | 1404.654254    | 702.830765       | 12 |
| 8  | 821.430451         | 411.218864        |                |                  | 803.419886     | 402.213581       | G    | 1325.612055        | 663.309666        | 1308.585506    | 654.796391       | 1307.601490    | 654.304383       | 11 |
| 9  | <b>950.473044</b>  | 475.740160        |                |                  | 932.462479     | 466.734878       | E    | 1268.590591        | 634.798934        | 1251.564042    | 626.285659       | 1250.580026    | 625.793651       | 10 |
| 10 | 1097.541458        | 549.274367        |                |                  | 1079.530893    | 540.269085       | F    | 1139.547998        | <b>570.277637</b> | 1122.521449    | 561.764363       | 1121.537433    | 561.272355       | 9  |
| 11 | 1211.584385        | 606.295831        | 1194.557836    | 597.782556       | 1193.573820    | 597.290548       | N    | <b>992.479584</b>  | 496.743430        | 975.453035     | 488.230156       | 974.469019     | 487.738148       | 8  |
| 12 | 1340.626978        | <b>670.817127</b> | 1323.600429    | 662.303853       | 1322.616413    | 661.811845       | E    | <b>878.436657</b>  | 439.721967        | 861.410108     | 431.208692       | 860.426092     | 430.716684       | 7  |
| 13 | <b>1439.695392</b> | 720.351334        | 1422.668843    | 711.838060       | 1421.684827    | 711.346052       | V    | <b>749.394064</b>  | 375.200670        | 732.367515     | 366.687396       | 731.383499     | 366.195388       | 6  |
| 14 | 1586.763806        | 793.885541        | 1569.737257    | 785.372267       | 1568.753241    | 784.880259       | F    | <b>650.325650</b>  | 325.666463        | 633.299101     | 317.153189       | 632.315085     | 316.661181       | 5  |
| 15 | 1700.806733        | 850.907005        | 1683.780184    | 842.393730       | 1682.796168    | 841.901722       | N    | <b>503.257236</b>  | 252.132256        | 486.230687     | 243.618982       | 485.246671     | 243.126974       | 4  |
| 16 | 1815.833676        | 908.420476        | 1798.807127    | 899.907202       | 1797.823111    | 899.415194       | D    | <b>389.214309</b>  | 195.110793        | 372.187760     | 186.597518       | 371.203744     | 186.105510       | 3  |
| 17 | 1914.902090        | 957.954683        | 1897.875541    | 949.441409       | 1896.891525    | 948.949401       | V    | <b>274.187366</b>  | 137.597321        | 257.160817     | 129.084047       |                |                  | 2  |
| 18 |                    |                   |                |                  |                |                  | R    | <b>175.118952</b>  | 88.063114         | 158.092403     | 79.549839        |                |                  | 1  |

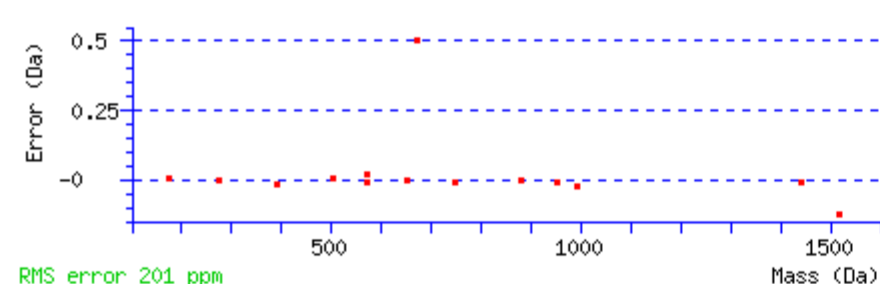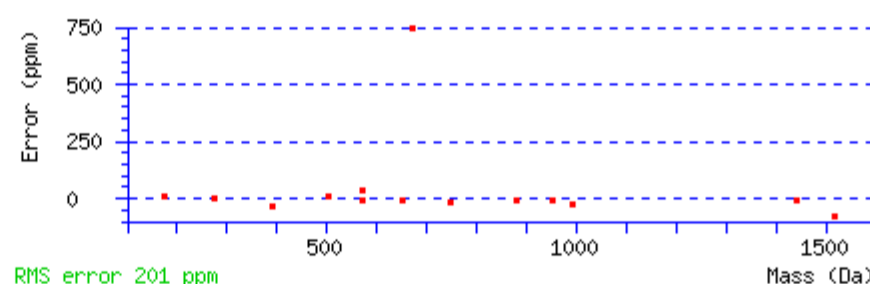

NCBI BLAST search of [FITHAPPGEFNEVFNDVR](#)

(Parameters: blastp, nr protein database, expect=20000, no filter, PAM30)

Other BLAST [web gateways](#)

## All matches to this query

| Score | Mr(calc):   | Delta     | Sequence                            |
|-------|-------------|-----------|-------------------------------------|
| 42.8  | 2088.006500 | -0.014588 | <a href="#">FITHAPPGEFNEVFNDVR</a>  |
| 3.6   | 2088.012360 | -0.020448 | <a href="#">TYVARNGEPEPTPVVNGEK</a> |
| 3.6   | 2088.012360 | -0.020448 | <a href="#">TYVARNGEPEPTPVVNGEK</a> |

# Mascot Search Results

## Peptide View

MS/MS Fragmentation of **STLNEIYFGK**

Found in **CAPZB\_HUMAN**, F-actin-capping protein subunit beta OS=Homo sapiens GN=CAPZB PE=1 SV=4

Match to Query 21374: 1170.592928 from(586.303740,2+) rtinseconds(2459) index(31240)

Title: Locus:1.1.1.1380.20

Data file 2012-01-27 - TFD - Epitel - IEC - 10ul - 3.mgf

Click mouse within plot area to zoom in by factor of two about that point

Or, Plot from  to  Da

Label all possible matches  Label matches used for scoring

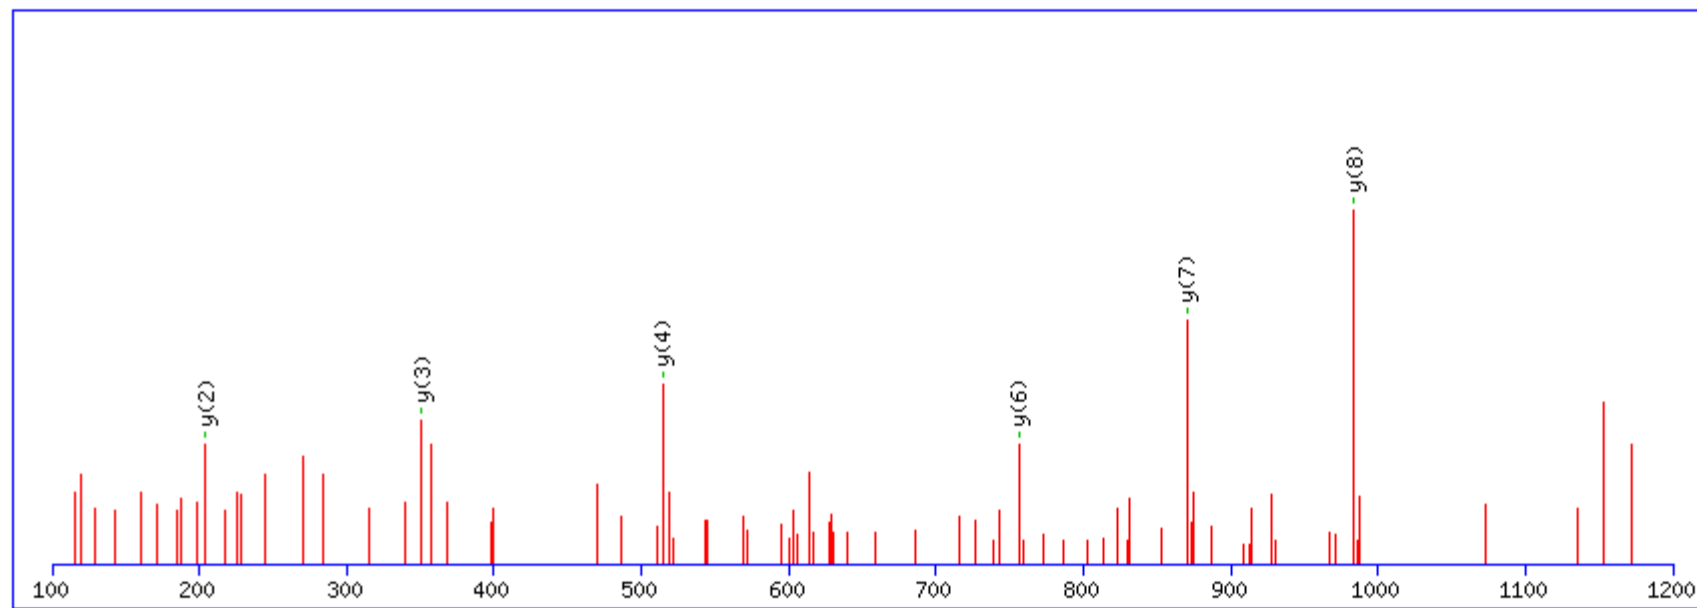

Monoisotopic mass of neutral peptide Mr(calc): 1170.592072

Fixed modifications: Carbamidomethyl (C) (apply to specified residues or termini only)

Ions Score: 42 Expect: 0.00046

Matches : 6/92 fragment ions using 11 most intense peaks ([help](#))

| #  | b           | b <sup>++</sup> | b <sup>*</sup> | b <sup>*++</sup> | b <sup>0</sup> | b <sup>0++</sup> | Seq. | y                 | y <sup>++</sup> | y <sup>*</sup> | y <sup>*++</sup> | y <sup>0</sup> | y <sup>0++</sup> | #  |
|----|-------------|-----------------|----------------|------------------|----------------|------------------|------|-------------------|-----------------|----------------|------------------|----------------|------------------|----|
| 1  | 88.039304   | 44.523290       |                |                  | 70.028739      | 35.518008        | S    |                   |                 |                |                  |                |                  | 10 |
| 2  | 189.086983  | 95.047129       |                |                  | 171.076418     | 86.041847        | T    | 1084.567338       | 542.787307      | 1067.540789    | 534.274033       | 1066.556773    | 533.782025       | 9  |
| 3  | 302.171047  | 151.589161      |                |                  | 284.160482     | 142.583879       | L    | <b>983.519659</b> | 492.263468      | 966.493110     | 483.750193       | 965.509094     | 483.258185       | 8  |
| 4  | 416.213974  | 208.610625      | 399.187425     | 200.097351       | 398.203409     | 199.605343       | N    | <b>870.435595</b> | 435.721436      | 853.409046     | 427.208161       | 852.425030     | 426.716153       | 7  |
| 5  | 545.256567  | 273.131922      | 528.230018     | 264.618647       | 527.246002     | 264.126639       | E    | <b>756.392668</b> | 378.699972      | 739.366119     | 370.186698       | 738.382103     | 369.694690       | 6  |
| 6  | 658.340631  | 329.673954      | 641.314082     | 321.160679       | 640.330066     | 320.668671       | I    | 627.350075        | 314.178676      | 610.323526     | 305.665401       |                |                  | 5  |
| 7  | 821.403960  | 411.205618      | 804.377411     | 402.692344       | 803.393395     | 402.200336       | Y    | <b>514.266011</b> | 257.636644      | 497.239462     | 249.123369       |                |                  | 4  |
| 8  | 968.472374  | 484.739825      | 951.445825     | 476.226551       | 950.461809     | 475.734543       | F    | <b>351.202682</b> | 176.104979      | 334.176133     | 167.591704       |                |                  | 3  |
| 9  | 1025.493838 | 513.250557      | 1008.467289    | 504.737283       | 1007.483273    | 504.245275       | G    | <b>204.134268</b> | 102.570772      | 187.107719     | 94.057498        |                |                  | 2  |
| 10 |             |                 |                |                  |                |                  | K    | 147.112804        | 74.060040       | 130.086255     | 65.546765        |                |                  | 1  |

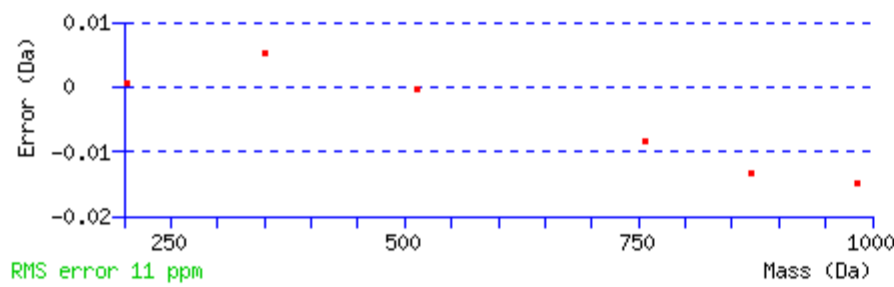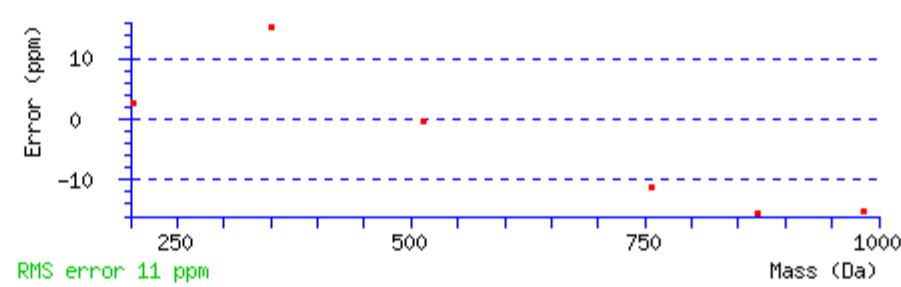

NCBI BLAST search of [STLNEIYFGK](#)

(Parameters: blastp, nr protein database, expect=20000, no filter, PAM30)

Other BLAST [web gateways](#)

## All matches to this query

| Score | Mr(calc):   | Delta     | Sequence                      |
|-------|-------------|-----------|-------------------------------|
| 42.5  | 1170.592072 | 0.000856  | <a href="#">STLNEIYFGK</a>    |
| 6.7   | 1170.588058 | 0.004870  | <a href="#">DQDGEILLPR</a>    |
| 5.9   | 1170.599289 | -0.006361 | <a href="#">TAAPASPQQIR</a>   |
| 4.7   | 1170.588074 | 0.004854  | <a href="#">GIPGDASGPLSGK</a> |

**Peptide View**

MS/MS Fragmentation of **MVMIQDGPLPTGADKPLR**

Found in **FUBP3\_HUMAN**, Far upstream element-binding protein 3 OS=Homo sapiens GN=FUBP3 PE=1 SV=2

Match to Query 37807: 2001.992232 from(668.338020,3+) rtinseconds(1644) index(15057)

Title: Locus:1.1.1.2120.47

Data file 2011-11-10 - TFD - EP 4-2.mgf

Click mouse within plot area to zoom in by factor of two about that point

Or, Plot from  to  Da

Label all possible matches  Label matches used for scoring

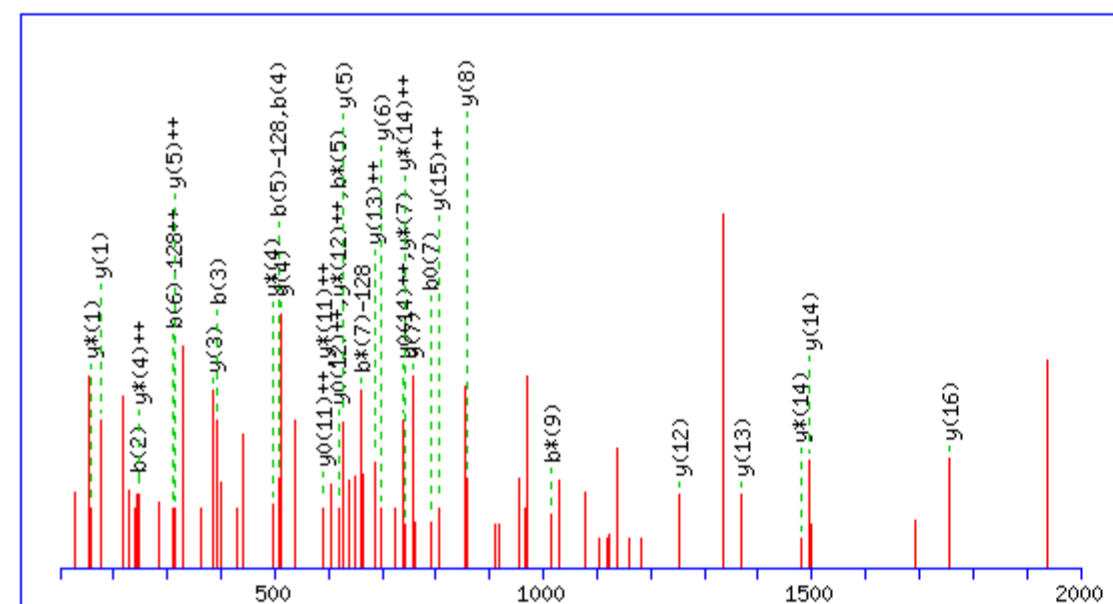

Monoisotopic mass of neutral peptide Mr(calc): 2001.986359

Fixed modifications: Propionamide (C) (apply to specified residues or termini only)

Variable modifications:

M1 : Oxidation (M), with neutral losses 0.000000 (shown in table), 63.998285

M3 : Oxidation (M), with neutral losses 0.000000 (shown in table), 63.998285

P8 : Oxidation (P)

P10 : Oxidation (P)

Ions Score: 44 Expect: 0.00014

Matches : 34/274 fragment ions using 70 most intense peaks [\(help\)](#)

| #  | b           | b <sup>++</sup> | b <sup>*</sup> | b <sup>*++</sup> | b <sup>0</sup> | b <sup>0++</sup> | Seq. | y           | y <sup>++</sup> | y <sup>*</sup> | y <sup>*++</sup> | y <sup>0</sup> | y <sup>0++</sup> | #  |
|----|-------------|-----------------|----------------|------------------|----------------|------------------|------|-------------|-----------------|----------------|------------------|----------------|------------------|----|
| 1  | 148.042676  | 74.524976       |                |                  |                |                  | M    |             |                 |                |                  |                |                  | 18 |
| 2  | 247.111090  | 124.059183      |                |                  |                |                  | V    | 1855.958228 | 928.482752      | 1838.931679    | 919.969478       | 1837.947663    | 919.477469       | 17 |
| 3  | 394.146490  | 197.576883      |                |                  |                |                  | M    | 1756.889814 | 878.948545      | 1739.863265    | 870.435271       | 1738.879249    | 869.943262       | 16 |
| 4  | 507.230554  | 254.118915      |                |                  |                |                  | I    | 1609.854414 | 805.430845      | 1592.827865    | 796.917571       | 1591.843849    | 796.425562       | 15 |
| 5  | 635.289132  | 318.148204      | 618.262583     | 309.634930       |                |                  | Q    | 1496.770350 | 748.888813      | 1479.743801    | 740.375539       | 1478.759785    | 739.883531       | 14 |
| 6  | 750.316075  | 375.661676      | 733.289526     | 367.148401       | 732.305510     | 366.656393       | D    | 1368.711772 | 684.859524      | 1351.685223    | 676.346250       | 1350.701207    | 675.854241       | 13 |
| 7  | 807.337539  | 404.172408      | 790.310990     | 395.659133       | 789.326974     | 395.167125       | G    | 1253.684829 | 627.346053      | 1236.658280    | 618.832778       | 1235.674264    | 618.340770       | 12 |
| 8  | 920.385218  | 460.696247      | 903.358669     | 452.182973       | 902.374653     | 451.690965       | P    | 1196.663365 | 598.835320      | 1179.636816    | 590.322046       | 1178.652800    | 589.830038       | 11 |
| 9  | 1033.469282 | 517.238279      | 1016.442733    | 508.725005       | 1015.458717    | 508.232997       | L    | 1083.615686 | 542.311481      | 1066.589137    | 533.798206       | 1065.605121    | 533.306198       | 10 |
| 10 | 1146.516961 | 573.762119      | 1129.490412    | 565.248844       | 1128.506396    | 564.756836       | P    | 970.531622  | 485.769449      | 953.505073     | 477.256174       | 952.521057     | 476.764166       | 9  |
| 11 | 1247.564640 | 624.285958      | 1230.538091    | 615.772684       | 1229.554075    | 615.280676       | T    | 857.483943  | 429.245610      | 840.457394     | 420.732335       | 839.473378     | 420.240327       | 8  |
| 12 | 1304.586104 | 652.796690      | 1287.559555    | 644.283416       | 1286.575539    | 643.791407       | G    | 756.436264  | 378.721770      | 739.409715     | 370.208495       | 738.425699     | 369.716487       | 7  |
| 13 | 1375.623218 | 688.315247      | 1358.596669    | 679.801973       | 1357.612653    | 679.309964       | A    | 699.414800  | 350.211038      | 682.388251     | 341.697764       | 681.404235     | 341.205756       | 6  |
| 14 | 1490.650161 | 745.828719      | 1473.623612    | 737.315444       | 1472.639596    | 736.823436       | D    | 628.377686  | 314.692481      | 611.351137     | 306.179207       | 610.367121     | 305.687199       | 5  |
| 15 | 1618.745124 | 809.876200      | 1601.718575    | 801.362926       | 1600.734559    | 800.870918       | K    | 513.350743  | 257.179010      | 496.324194     | 248.665735       |                |                  | 4  |
| 16 | 1715.797888 | 858.402582      | 1698.771339    | 849.889308       | 1697.787323    | 849.397300       | P    | 385.255780  | 193.131528      | 368.229231     | 184.618253       |                |                  | 3  |
| 17 | 1828.881952 | 914.944614      | 1811.855403    | 906.431340       | 1810.871387    | 905.939331       | L    | 288.203016  | 144.605146      | 271.176467     | 136.091871       |                |                  | 2  |
| 18 |             |                 |                |                  |                |                  | R    | 175.118952  | 88.063114       | 158.092403     | 79.549839        |                |                  | 1  |

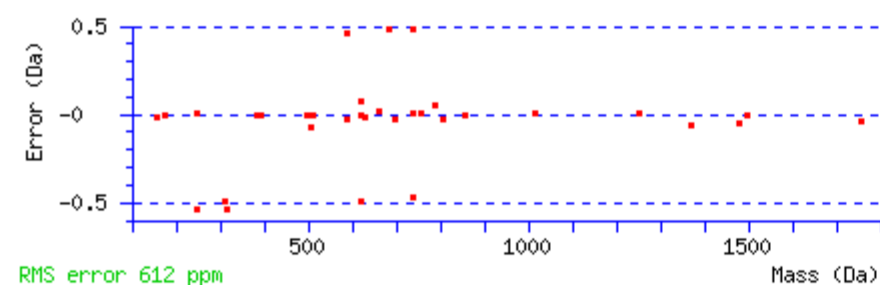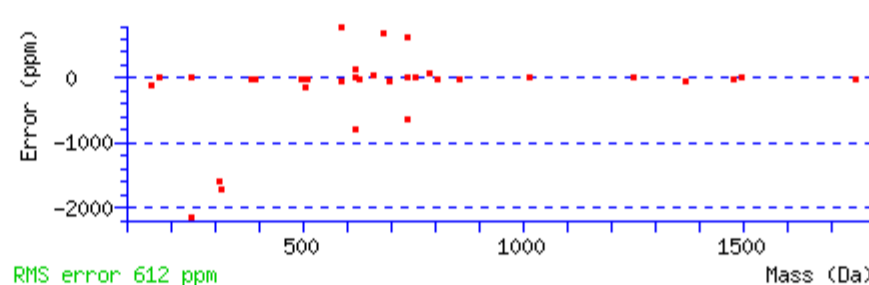

NCBI BLAST search of [MVMIQDGPLPTGADKPLR](#)

(Parameters: blastp, nr protein database, expect=20000, no filter, PAM30)

Other BLAST [web gateways](#)

**All matches to this query**

| Score | Mr(calc):   | Delta    | Sequence                           |
|-------|-------------|----------|------------------------------------|
| 44.4  | 2001.986359 | 0.005873 | <a href="#">MVMIQDGPLPTGADKPLR</a> |
| 3.4   | 2001.986359 | 0.005873 | <a href="#">MVMIQDGPLPTGADKPLR</a> |
| 2.9   | 2001.986359 | 0.005873 | <a href="#">MVMIQDGPLPTGADKPLR</a> |
| 1.0   | 2001.986313 | 0.005919 | <a href="#">MLAMPIDLDLTSPEERR</a>  |

# Mascot Search Results

## Peptide View

MS/MS Fragmentation of **WLEQYYVGELR**

Found in **FA2H\_HUMAN**, Fatty acid 2-hydroxylase OS=Homo sapiens GN=FA2H PE=1 SV=1

Match to Query 44788: 1454.709928 from(728.362240,2+) rtinseconds(3214) index(45554)

Title: Locus:1.1.1.2564.35

Data file 2011-11-10 - TFD - EP 3-4.mgf

Click mouse within plot area to zoom in by factor of two about that point

Or, Plot from  to  Da

Label all possible matches  Label matches used for scoring

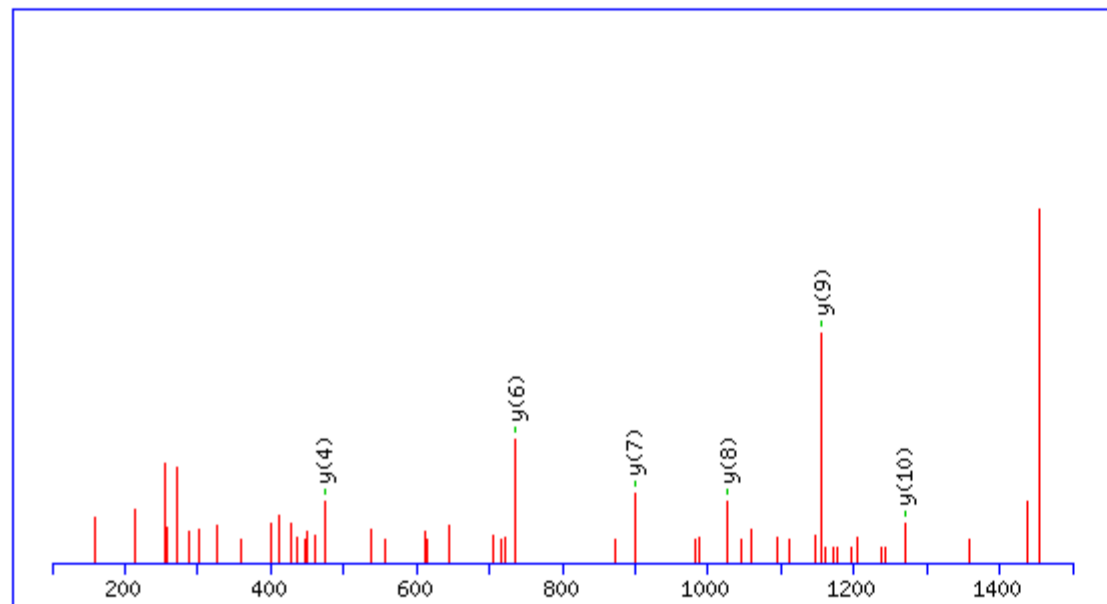

Monoisotopic mass of neutral peptide Mr(calc): 1454.719391

Fixed modifications: Propionamide (C) (apply to specified residues or termini only)

Ions Score: 37 Expect: 0.0034

Matches : 6/106 fragment ions using 12 most intense peaks ([help](#))

| #  | b           | b <sup>++</sup> | b*          | b <sup>+++</sup> | b <sup>0</sup> | b <sup>0++</sup> | Seq. | y           | y <sup>++</sup> | y*          | y <sup>+++</sup> | y <sup>0</sup> | y <sup>0++</sup> | #  |
|----|-------------|-----------------|-------------|------------------|----------------|------------------|------|-------------|-----------------|-------------|------------------|----------------|------------------|----|
| 1  | 187.086589  | 94.046932       |             |                  |                |                  | W    |             |                 |             |                  |                |                  | 11 |
| 2  | 300.170653  | 150.588965      |             |                  |                |                  | L    | 1269.647380 | 635.327328      | 1252.620831 | 626.814054       | 1251.636815    | 626.322046       | 10 |
| 3  | 429.213246  | 215.110261      |             |                  | 411.202681     | 206.104979       | E    | 1156.563316 | 578.785296      | 1139.536767 | 570.272022       | 1138.552751    | 569.780014       | 9  |
| 4  | 557.271824  | 279.139550      | 540.245275  | 270.626276       | 539.261259     | 270.134268       | Q    | 1027.520723 | 514.264000      | 1010.494174 | 505.750725       | 1009.510158    | 505.258717       | 8  |
| 5  | 720.335153  | 360.671215      | 703.308604  | 352.157940       | 702.324588     | 351.665932       | Y    | 899.462145  | 450.234711      | 882.435596  | 441.721436       | 881.451580     | 441.229428       | 7  |
| 6  | 883.398482  | 442.202879      | 866.371933  | 433.689605       | 865.387917     | 433.197597       | Y    | 736.398816  | 368.703046      | 719.372267  | 360.189771       | 718.388251     | 359.697763       | 6  |
| 7  | 982.466896  | 491.737086      | 965.440347  | 483.223812       | 964.456331     | 482.731804       | V    | 573.335487  | 287.171381      | 556.308938  | 278.658107       | 555.324922     | 278.166099       | 5  |
| 8  | 1039.488360 | 520.247818      | 1022.461811 | 511.734544       | 1021.477795    | 511.242536       | G    | 474.267073  | 237.637174      | 457.240524  | 229.123900       | 456.256508     | 228.631892       | 4  |
| 9  | 1168.530953 | 584.769115      | 1151.504404 | 576.255840       | 1150.520388    | 575.763832       | E    | 417.245609  | 209.126442      | 400.219060  | 200.613168       | 399.235044     | 200.121160       | 3  |
| 10 | 1281.615017 | 641.311147      | 1264.588468 | 632.797872       | 1263.604452    | 632.305864       | L    | 288.203016  | 144.605146      | 271.176467  | 136.091871       |                |                  | 2  |
| 11 |             |                 |             |                  |                |                  | R    | 175.118952  | 88.063114       | 158.092403  | 79.549839        |                |                  | 1  |

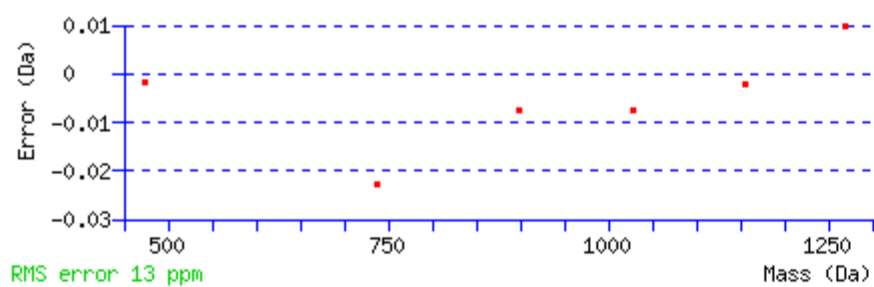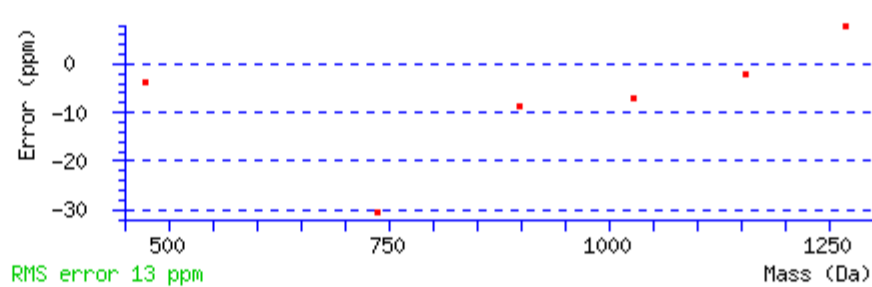

NCBI BLAST search of **WLEQYYVGELR**

(Parameters: blastp, nr protein database, expect=20000, no filter, PAM30)

Other BLAST [web gateways](#)

All matches to this query

| Score | Mr(calc):   | Delta     | Sequence                       |
|-------|-------------|-----------|--------------------------------|
| 37.1  | 1454.719391 | -0.009463 | <a href="#">WLEQYYVGELR</a>    |
| 8.0   | 1454.711365 | -0.001437 | <a href="#">DAPSLRSSPGPAPR</a> |

Mascot: <http://www.matrixscience.com/>

# MASCOT SCIENCE Mascot Search Results

## Peptide View

MS/MS Fragmentation of **SDAGCLYELTVK**

Found in **FBX2\_HUMAN**, F-box only protein 2 OS=Homo sapiens GN=FBXO2 PE=1 SV=2

Match to Query 40022: 1368.662588 from(685.338570,2+) rtinseconds(2643) index(34215)

Title: Locus:1.1.1.2422.29

Data file 2011-11-12 - TFD - EP 5-4.mgf

Click mouse within plot area to zoom in by factor of two about that point

Or, Plot from  to  Da

Label all possible matches  Label matches used for scoring

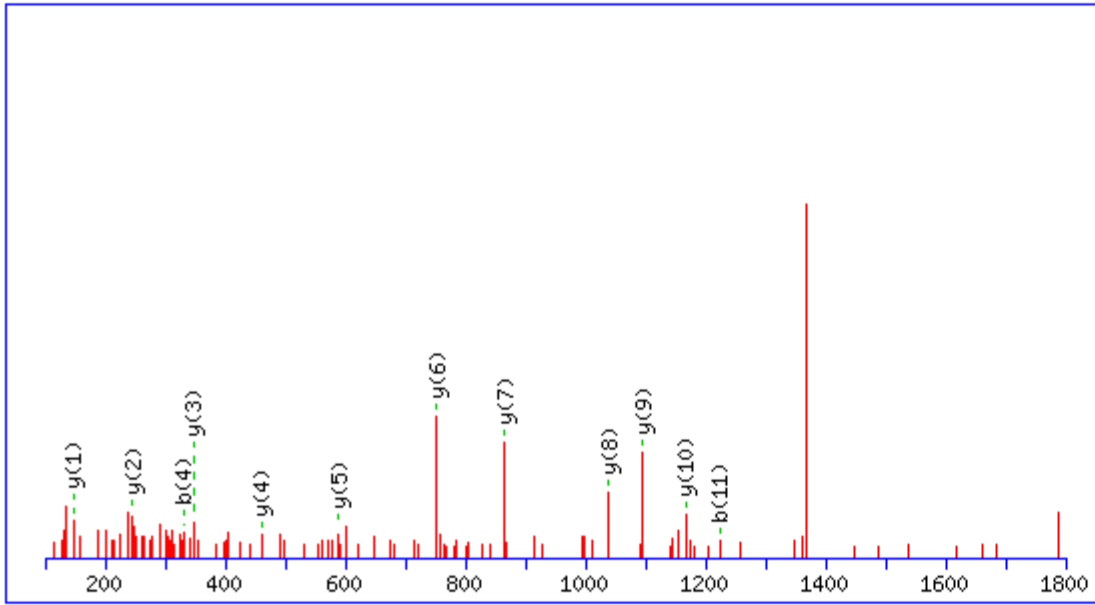

Monoisotopic mass of neutral peptide Mr(calc): 1368.659500

Fixed modifications: Propionamide (C) (apply to specified residues or termini only)

Ions Score: 69 Expect: 7e-007

Matches : 12/106 fragment ions using 26 most intense peaks [\(help\)](#)

| #  | b                  | b <sup>++</sup> | b <sup>0</sup> | b <sup>0++</sup> | Seq. | y                  | y <sup>++</sup> | y <sup>*</sup> | y <sup>*++</sup> | y <sup>0</sup> | y <sup>0++</sup> | #  |
|----|--------------------|-----------------|----------------|------------------|------|--------------------|-----------------|----------------|------------------|----------------|------------------|----|
| 1  | 88.039304          | 44.523290       | 70.028739      | 35.518008        | S    |                    |                 |                |                  |                |                  | 12 |
| 2  | 203.066247         | 102.036761      | 185.055682     | 93.031479        | D    | 1282.634767        | 641.821022      | 1265.608218    | 633.307747       | 1264.624202    | 632.815739       | 11 |
| 3  | 274.103361         | 137.555319      | 256.092796     | 128.550036       | A    | <b>1167.607824</b> | 584.307550      | 1150.581275    | 575.794276       | 1149.597259    | 575.302268       | 10 |
| 4  | <b>331.124825</b>  | 166.066050      | 313.114260     | 157.060768       | G    | <b>1096.570710</b> | 548.788993      | 1079.544161    | 540.275719       | 1078.560145    | 539.783711       | 9  |
| 5  | 505.171124         | 253.089200      | 487.160559     | 244.083918       | C    | <b>1039.549246</b> | 520.278261      | 1022.522697    | 511.764987       | 1021.538681    | 511.272979       | 8  |
| 6  | 618.255188         | 309.631232      | 600.244623     | 300.625950       | L    | <b>865.502947</b>  | 433.255112      | 848.476398     | 424.741837       | 847.492382     | 424.249829       | 7  |
| 7  | 781.318517         | 391.162897      | 763.307952     | 382.157614       | Y    | <b>752.418883</b>  | 376.713080      | 735.392334     | 368.199805       | 734.408318     | 367.707797       | 6  |
| 8  | 910.361110         | 455.684193      | 892.350545     | 446.678911       | E    | <b>589.355554</b>  | 295.181415      | 572.329005     | 286.668141       | 571.344989     | 286.176133       | 5  |
| 9  | 1023.445174        | 512.226225      | 1005.434609    | 503.220943       | L    | <b>460.312961</b>  | 230.660119      | 443.286412     | 222.146844       | 442.302396     | 221.654836       | 4  |
| 10 | 1124.492853        | 562.750065      | 1106.482288    | 553.744782       | T    | <b>347.228897</b>  | 174.118087      | 330.202348     | 165.604812       | 329.218332     | 165.112804       | 3  |
| 11 | <b>1223.561267</b> | 612.284272      | 1205.550702    | 603.278989       | V    | <b>246.181218</b>  | 123.594247      | 229.154669     | 115.080973       |                |                  | 2  |
| 12 |                    |                 |                |                  | K    | <b>147.112804</b>  | 74.060040       | 130.086255     | 65.546765        |                |                  | 1  |

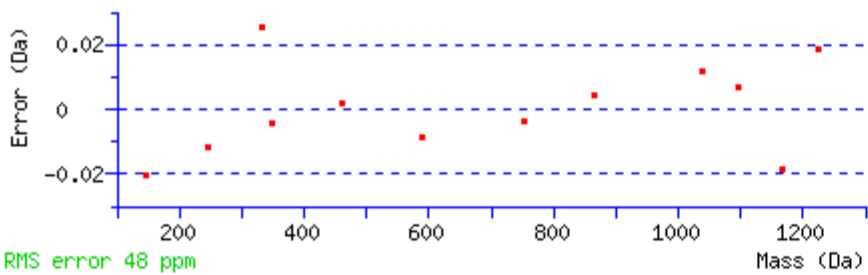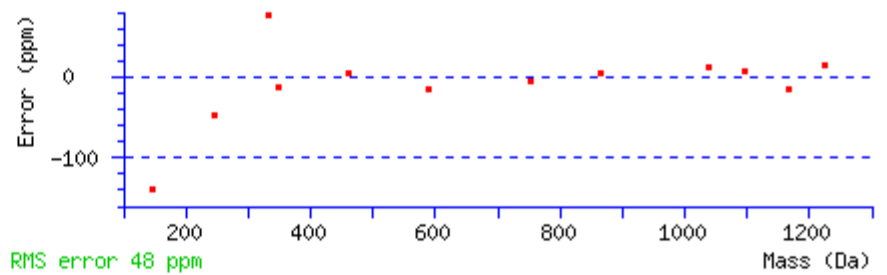

NCBI BLAST search of [SDAGCLYELTVK](#)

(Parameters: blastp, nr protein database, expect=20000, no filter, PAM30)

Other BLAST [web gateways](#)

## All matches to this query

| Score | Mr(calc):   | Delta     | Sequence                      |
|-------|-------------|-----------|-------------------------------|
| 69.0  | 1368.659500 | 0.003088  | <a href="#">SDAGCLYELTVK</a>  |
| 3.3   | 1368.652985 | 0.009603  | <a href="#">GGDEVFMFRIAK</a>  |
| 2.8   | 1368.667374 | -0.004786 | <a href="#">DLNFKGFSGAGEK</a> |
| 2.1   | 1368.674774 | -0.012186 | <a href="#">QIEAMGFPAFVK</a>  |

Mascot: <http://www.matrixscience.com/>

**Peptide View**

MS/MS Fragmentation of **STFVLSNLAEVVER**

Found in **FBX22\_HUMAN**, F-box only protein 22 OS=Homo sapiens GN=FBXO22 PE=1 SV=1

Match to Query 49976: 1562.819948 from(782.417250,2+) rtinseconds(3775) index(55467)

Title: Locus:1.1.1.2847.31

Data file 2011-11-12 - TFD - EP 5-4.mgf

Click mouse within plot area to zoom in by factor of two about that point

Or, Plot from  to  Da

Label all possible matches  Label matches used for scoring

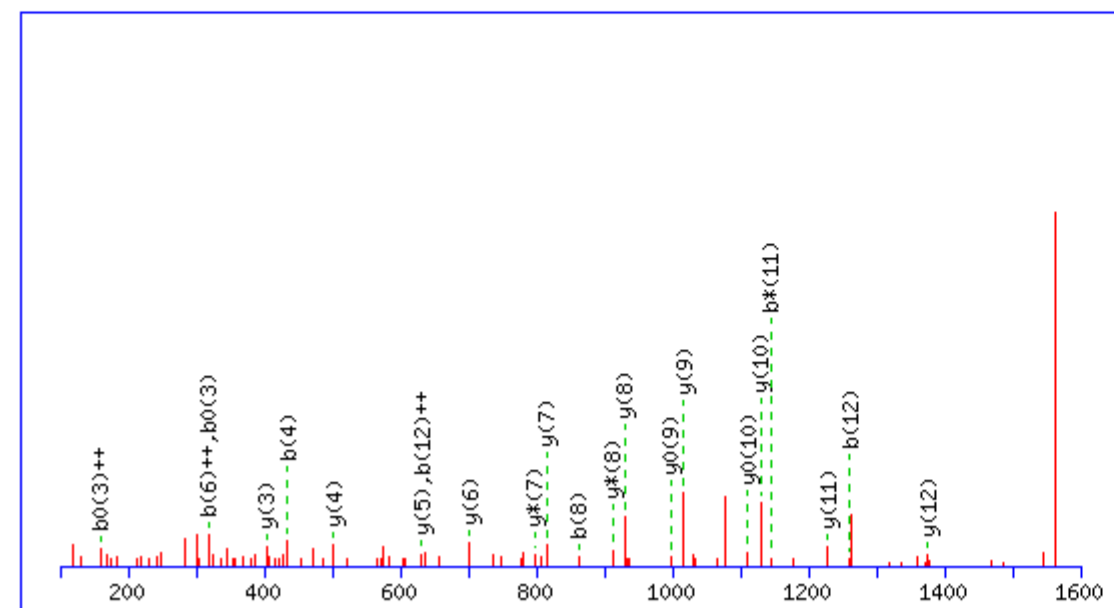

**Monoisotopic mass of neutral peptide Mr(calcd): 1562.830414**

Fixed modifications: Propionamide (C) (apply to specified residues or termini only)

Ions Score: 59 Expect: 2.7e-005

Matches : 22/142 fragment ions using 41 most intense peaks [\(help\)](#)

| #  | b           | b <sup>++</sup> | b <sup>*</sup> | b <sup>*++</sup> | b <sup>0</sup> | b <sup>0++</sup> | Seq. | y           | y <sup>++</sup> | y <sup>*</sup> | y <sup>*++</sup> | y <sup>0</sup> | y <sup>0++</sup> | #  |
|----|-------------|-----------------|----------------|------------------|----------------|------------------|------|-------------|-----------------|----------------|------------------|----------------|------------------|----|
| 1  | 88.039304   | 44.523290       |                |                  | 70.028739      | 35.518008        | S    |             |                 |                |                  |                |                  | 14 |
| 2  | 189.086983  | 95.047129       |                |                  | 171.076418     | 86.041847        | T    | 1476.805670 | 738.906473      | 1459.779121    | 730.393199       | 1458.795105    | 729.901190       | 13 |
| 3  | 336.155397  | 168.581336      |                |                  | 318.144832     | 159.576054       | F    | 1375.757991 | 688.382634      | 1358.731442    | 679.869359       | 1357.747426    | 679.377351       | 12 |
| 4  | 435.223811  | 218.115543      |                |                  | 417.213246     | 209.110261       | V    | 1228.689577 | 614.848427      | 1211.663028    | 606.335152       | 1210.679012    | 605.843144       | 11 |
| 5  | 548.307875  | 274.657576      |                |                  | 530.297310     | 265.652293       | L    | 1129.621163 | 565.314220      | 1112.594614    | 556.800945       | 1111.610598    | 556.308937       | 10 |
| 6  | 635.339903  | 318.173589      |                |                  | 617.329338     | 309.168307       | S    | 1016.537099 | 508.772188      | 999.510550     | 500.258913       | 998.526534     | 499.766905       | 9  |
| 7  | 749.382830  | 375.195053      | 732.356281     | 366.681778       | 731.372265     | 366.189770       | N    | 929.505071  | 465.256174      | 912.478522     | 456.742899       | 911.494506     | 456.250891       | 8  |
| 8  | 862.466894  | 431.737085      | 845.440345     | 423.223810       | 844.456329     | 422.731802       | L    | 815.462144  | 408.234710      | 798.435595     | 399.721436       | 797.451579     | 399.229428       | 7  |
| 9  | 933.504008  | 467.255642      | 916.477459     | 458.742367       | 915.493443     | 458.250359       | A    | 702.378080  | 351.692678      | 685.351531     | 343.179404       | 684.367515     | 342.687396       | 6  |
| 10 | 1062.546601 | 531.776938      | 1045.520052    | 523.263664       | 1044.536036    | 522.771656       | E    | 631.340966  | 316.174121      | 614.314417     | 307.660847       | 613.330401     | 307.168839       | 5  |
| 11 | 1161.615015 | 581.311145      | 1144.588466    | 572.797871       | 1143.604450    | 572.305863       | V    | 502.298373  | 251.652825      | 485.271824     | 243.139550       | 484.287808     | 242.647542       | 4  |
| 12 | 1260.683429 | 630.845352      | 1243.656880    | 622.332078       | 1242.672864    | 621.840070       | V    | 403.229959  | 202.118618      | 386.203410     | 193.605343       | 385.219394     | 193.113335       | 3  |
| 13 | 1389.726022 | 695.366649      | 1372.699473    | 686.853375       | 1371.715457    | 686.361367       | E    | 304.161545  | 152.584411      | 287.134996     | 144.071136       | 286.150980     | 143.579128       | 2  |
| 14 |             |                 |                |                  |                |                  | R    | 175.118952  | 88.063114       | 158.092403     | 79.549839        |                |                  | 1  |

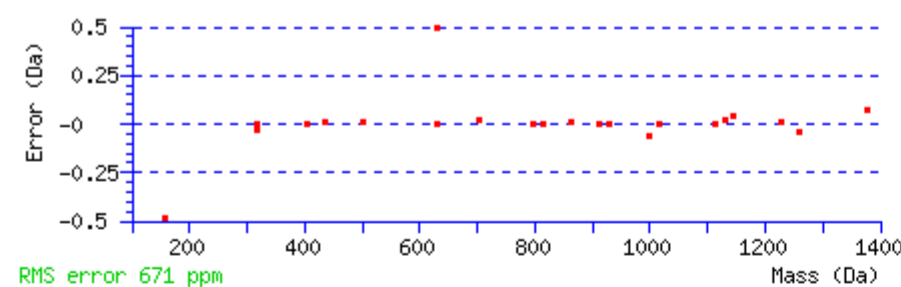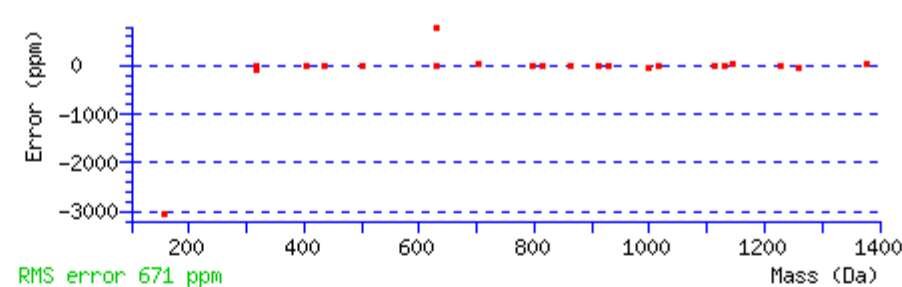

NCBI BLAST search of [STFVLSNLAEVVER](#)

(Parameters: blastp, nr protein database, expect=20000, no filter, PAM30)

Other BLAST [web gateways](#)

**All matches to this query**

| Score | Mr(calcd):  | Delta     | Sequence                       |
|-------|-------------|-----------|--------------------------------|
| 59.4  | 1562.830414 | -0.010466 | <a href="#">STFVLSNLAEVVER</a> |
| 18.2  | 1562.809311 | 0.010637  | <a href="#">WNSVFDQLTQVVK</a>  |
| 3.3   | 1562.812683 | 0.007265  | <a href="#">IMPPSKPHPPVVGK</a> |
| 3.3   | 1562.812683 | 0.007265  | <a href="#">IMPPSKPHPPVVGK</a> |



# MASCOT Search Results

## Peptide View

MS/MS Fragmentation of **IGLSLAPR**

Found in **FBX42\_HUMAN**, F-box only protein 42 OS=Homo sapiens GN=FBXO42 PE=1 SV=1

Match to Query 3493: 841.503568 from(421.759060,2+) rtinseconds(1915) index(19574)

Title: Locus:1.1.1.2189.6

Data file 2011-11-14 - TFD - EP 7-2.mgf

Click mouse within plot area to zoom in by factor of two about that point

Or, Plot from  to  Da

Label all possible matches  Label matches used for scoring

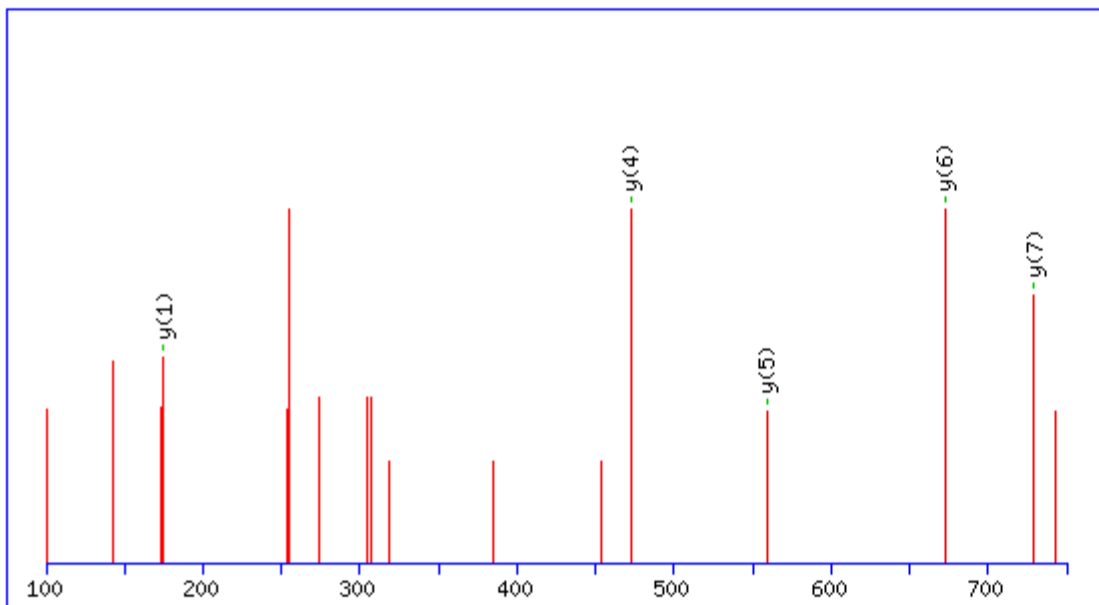

Monoisotopic mass of neutral peptide Mr(calc): 841.502136

Fixed modifications: Propionamide (C) (apply to specified residues or termini only)

Variable modifications:

P7 : Oxidation (P)

Ions Score: 42 Expect: 0.00043

Matches : 5/56 fragment ions using 7 most intense peaks [\(help\)](#)

| # | b          | b <sup>++</sup> | b <sup>0</sup> | b <sup>0++</sup> | Seq. | y          | y <sup>++</sup> | y <sup>*</sup> | y <sup>*++</sup> | y <sup>0</sup> | y <sup>0++</sup> | # |
|---|------------|-----------------|----------------|------------------|------|------------|-----------------|----------------|------------------|----------------|------------------|---|
| 1 | 114.091340 | 57.549308       |                |                  | I    |            |                 |                |                  |                |                  | 8 |
| 2 | 171.112804 | 86.060040       |                |                  | G    | 729.425365 | 365.216321      | 712.398816     | 356.703046       | 711.414800     | 356.211038       | 7 |
| 3 | 284.196868 | 142.602072      |                |                  | L    | 672.403901 | 336.705589      | 655.377352     | 328.192314       | 654.393336     | 327.700306       | 6 |
| 4 | 371.228896 | 186.118086      | 353.218331     | 177.112804       | S    | 559.319837 | 280.163557      | 542.293288     | 271.650282       | 541.309272     | 271.158274       | 5 |
| 5 | 484.312960 | 242.660118      | 466.302395     | 233.654836       | L    | 472.287809 | 236.647543      | 455.261260     | 228.134268       |                |                  | 4 |
| 6 | 555.350074 | 278.178675      | 537.339509     | 269.173393       | A    | 359.203745 | 180.105511      | 342.177196     | 171.592236       |                |                  | 3 |
| 7 | 668.397753 | 334.702515      | 650.387188     | 325.697232       | P    | 288.166631 | 144.586954      | 271.140082     | 136.073679       |                |                  | 2 |
| 8 |            |                 |                |                  | R    | 175.118952 | 88.063114       | 158.092403     | 79.549840        |                |                  | 1 |

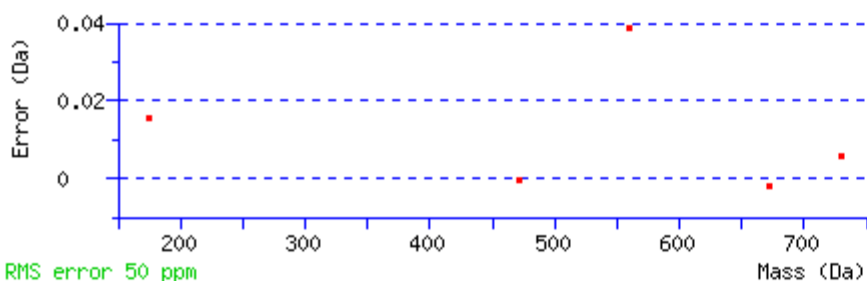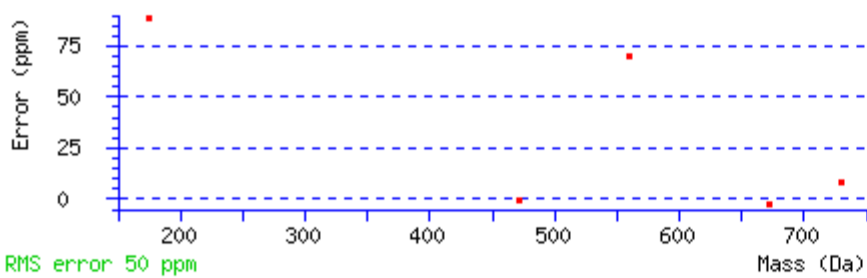

NCBI BLAST search of [IGLSLAPR](#)

(Parameters: blastp, nr protein database, expect=20000, no filter, PAM30)

Other BLAST [web gateways](#)

## All matches to this query

| Score | Mr(calc):  | Delta    | Sequence                 |
|-------|------------|----------|--------------------------|
| 42.3  | 841.502136 | 0.001432 | <a href="#">IGLSLAPR</a> |
| 16.7  | 841.502136 | 0.001432 | <a href="#">LEKTVPR</a>  |
| 12.6  | 841.502151 | 0.001417 | <a href="#">ISGLPVTR</a> |
| 11.4  | 841.502136 | 0.001432 | <a href="#">ILGLAPSR</a> |
| 11.4  | 841.502121 | 0.001447 | <a href="#">IVAEAIAR</a> |
| 8.4   | 841.502167 | 0.001401 | <a href="#">VVATVPTR</a> |
| 8.3   | 841.502136 | 0.001432 | <a href="#">LPKTEVR</a>  |
| 7.5   | 841.502121 | 0.001447 | <a href="#">ELKSIPR</a>  |
| 5.6   | 841.502151 | 0.001417 | <a href="#">ITQLPVR</a>  |
| 4.0   | 841.502136 | 0.001432 | <a href="#">LTPIDKR</a>  |

# **MASCOT** Mascot Search Results

## Peptide View

MS/MS Fragmentation of **NPIAQSTDGAR**

Found in **FBSPI\_HUMAN**, F-box/SPRY domain-containing protein 1 OS=Homo sapiens GN=FBXO45 PE=1 SV=1

Match to Query 25322: 1128.545088 from(565.279820,2+) rtinseconds(1041) index(3087)

Title: Locus:1.1.1.1710.38

Data file 2011-11-10 - TFD - EP 4-5.mgf

Click mouse within plot area to zoom in by factor of two about that point

Or, Plot from  to  Da

Label all possible matches  Label matches used for scoring

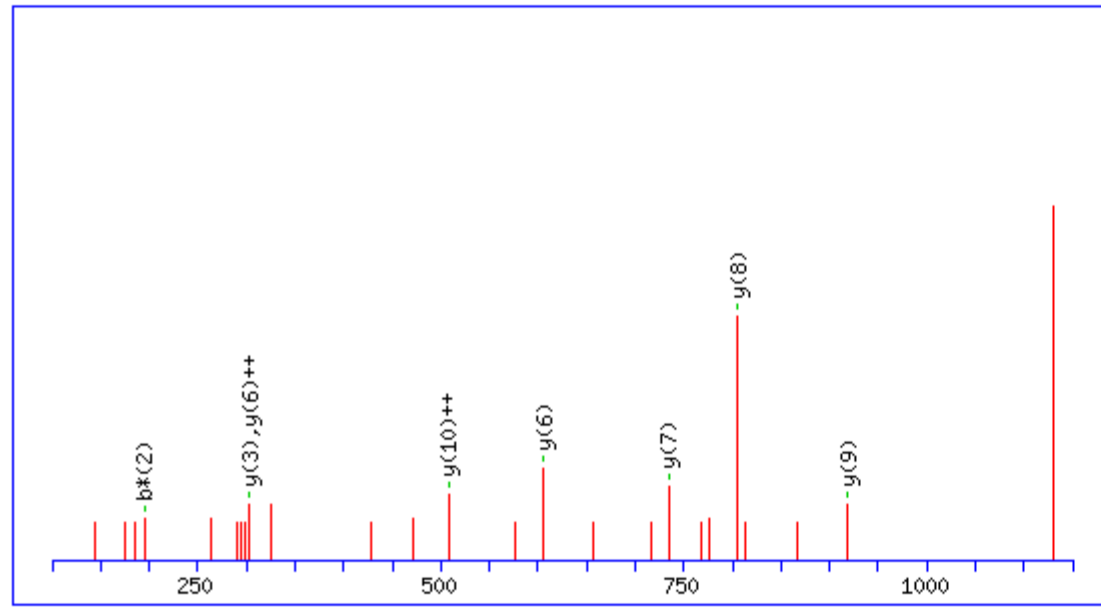

Monoisotopic mass of neutral peptide Mr(calc): 1128.552338

Fixed modifications: Propionamide (C) (apply to specified residues or termini only)

Ions Score: 39 Expect: 0.00026

Matches : 8/104 fragment ions using 8 most intense peaks [\(help\)](#)

| #  | b          | b <sup>++</sup> | b <sup>+</sup> | b <sup>+++</sup> | b <sup>0</sup> | b <sup>0++</sup> | Seq. | y           | y <sup>++</sup> | y <sup>+</sup> | y <sup>+++</sup> | y <sup>0</sup> | y <sup>0++</sup> | #  |
|----|------------|-----------------|----------------|------------------|----------------|------------------|------|-------------|-----------------|----------------|------------------|----------------|------------------|----|
| 1  | 115.050203 | 58.028740       | 98.023654      | 49.515465        |                |                  | N    |             |                 |                |                  |                |                  | 11 |
| 2  | 212.102967 | 106.555121      | 195.076418     | 98.041847        |                |                  | P    | 1015.516700 | 508.261988      | 998.490151     | 499.748714       | 997.506135     | 499.256706       | 10 |
| 3  | 325.187031 | 163.097153      | 308.160482     | 154.583879       |                |                  | I    | 918.463936  | 459.735606      | 901.437387     | 451.222332       | 900.453371     | 450.730324       | 9  |
| 4  | 396.224145 | 198.615710      | 379.197596     | 190.102436       |                |                  | A    | 805.379872  | 403.193574      | 788.353323     | 394.680300       | 787.369307     | 394.188292       | 8  |
| 5  | 524.282723 | 262.645000      | 507.256174     | 254.131725       |                |                  | Q    | 734.342758  | 367.675017      | 717.316209     | 359.161743       | 716.332193     | 358.669735       | 7  |
| 6  | 611.314751 | 306.161014      | 594.288202     | 297.647739       | 593.304186     | 297.155731       | S    | 606.284180  | 303.645728      | 589.257631     | 295.132454       | 588.273615     | 294.640446       | 6  |
| 7  | 712.362430 | 356.684853      | 695.335881     | 348.171579       | 694.351865     | 347.679571       | T    | 519.252152  | 260.129714      | 502.225603     | 251.616440       | 501.241587     | 251.124432       | 5  |
| 8  | 827.389373 | 414.198325      | 810.362824     | 405.685050       | 809.378808     | 405.193042       | D    | 418.204473  | 209.605875      | 401.177924     | 201.092600       | 400.193908     | 200.600592       | 4  |
| 9  | 884.410837 | 442.709057      | 867.384288     | 434.195782       | 866.400272     | 433.703774       | G    | 303.177530  | 152.092403      | 286.150981     | 143.579129       |                |                  | 3  |
| 10 | 955.447951 | 478.227614      | 938.421402     | 469.714339       | 937.437386     | 469.222331       | A    | 246.156066  | 123.581671      | 229.129517     | 115.068397       |                |                  | 2  |
| 11 |            |                 |                |                  |                |                  | R    | 175.118952  | 88.063114       | 158.092403     | 79.549840        |                |                  | 1  |

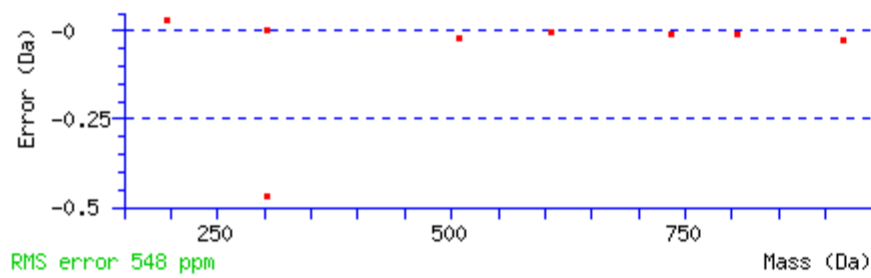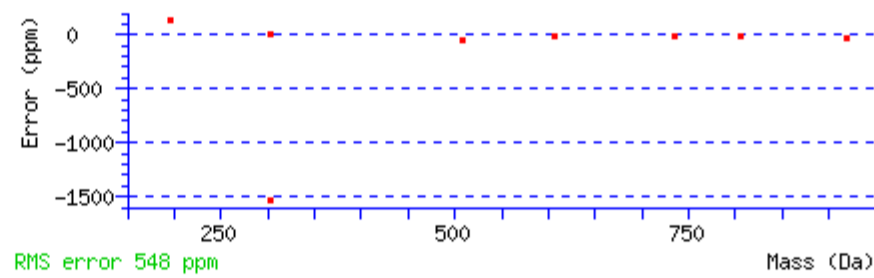

NCBI BLAST search of **NPIAQSTDGAR**

(Parameters: blastp, nr protein database, expect=20000, no filter, PAM30)

Other BLAST [web gateways](#)

All matches to this query

| Score | Mr(calc):   | Delta     | Sequence                    |
|-------|-------------|-----------|-----------------------------|
| 39.0  | 1128.552338 | -0.007250 | <a href="#">NPIAQSTDGAR</a> |
| 0.8   | 1128.552338 | -0.007250 | <a href="#">NPSSAAPVQSR</a> |
| 0.4   | 1128.552338 | -0.007250 | <a href="#">NPSSAAPVQSR</a> |

Mascot: <http://www.matrixscience.com/>

# MASCOT Search Results

## Peptide View

MS/MS Fragmentation of **HSTASHSSSHTSGIEADTKPR**  
 Found in **FRMD6\_HUMAN**, FERM domain-containing protein 6 OS=Homo sapiens GN=FRMD6 PE=1 SV=1

Match to Query 1032532: 2192.013970 from(439.410070,5+) rtinseconds(701) index(817119)  
 Title: Locus:1.1.1.803.3  
 Data file C:\Program Files (x86)\Matrix Science\Mascot Daemon\mgf3 TFD - Epitel - R2\mascot\_daemon\_merge.mgf

Click mouse within plot area to zoom in by factor of two about that point

Or, Plot from  to  Da   
 Label all possible matches  Label matches used for scoring

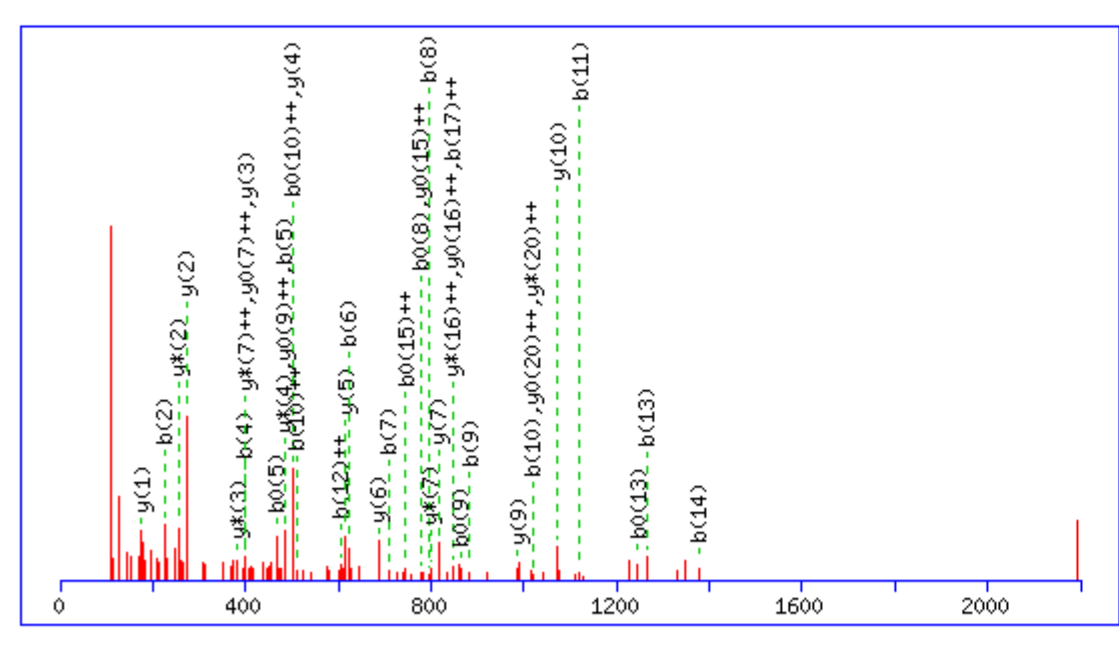

Monoisotopic mass of neutral peptide Mr(calc): 2192.020630  
 Fixed modifications: Carbamidomethyl (C) (apply to specified residues or termini only)  
 Ions Score: 63 Expect: 2.7e-006  
 Matches : 41/196 fragment ions using 80 most intense peaks [\(help\)](#)

| #  | b                  | b <sup>++</sup>   | b <sup>*</sup> | b <sup>***</sup> | b <sup>0</sup>     | b <sup>0++</sup>  | Seq. | y                  | y <sup>++</sup> | y <sup>*</sup>    | y <sup>***</sup>   | y <sup>0</sup> | y <sup>0++</sup>   | #  |
|----|--------------------|-------------------|----------------|------------------|--------------------|-------------------|------|--------------------|-----------------|-------------------|--------------------|----------------|--------------------|----|
| 1  | 138.066188         | 69.536732         |                |                  |                    |                   | H    |                    |                 |                   |                    |                |                    | 21 |
| 2  | <b>225.098216</b>  | 113.052746        |                |                  | 207.087651         | 104.047463        | S    | 2055.969000        | 1028.488138     | 2038.942451       | <b>1019.974863</b> | 2037.958435    | <b>1019.482855</b> | 20 |
| 3  | 326.145895         | 163.576585        |                |                  | 308.135330         | 154.571303        | T    | 1968.936972        | 984.972124      | 1951.910423       | 976.458850         | 1950.926407    | 975.966842         | 19 |
| 4  | <b>397.183009</b>  | 199.095143        |                |                  | 379.172444         | 190.089860        | A    | 1867.889293        | 934.448285      | 1850.862744       | 925.935010         | 1849.878728    | 925.443002         | 18 |
| 5  | <b>484.215037</b>  | 242.611156        |                |                  | <b>466.204472</b>  | 233.605874        | S    | 1796.852179        | 898.929728      | 1779.825630       | 890.416453         | 1778.841614    | 889.924445         | 17 |
| 6  | <b>621.273949</b>  | 311.140613        |                |                  | 603.263384         | 302.135330        | H    | 1709.820151        | 855.413714      | 1692.793602       | <b>846.900439</b>  | 1691.809586    | <b>846.408431</b>  | 16 |
| 7  | <b>708.305977</b>  | 354.656627        |                |                  | 690.295412         | 345.651344        | S    | 1572.761239        | 786.884258      | 1555.734690       | 778.370983         | 1554.750674    | <b>777.878975</b>  | 15 |
| 8  | <b>795.338005</b>  | 398.172641        |                |                  | <b>777.327440</b>  | 389.167358        | S    | 1485.729211        | 743.368244      | 1468.702662       | 734.854969         | 1467.718646    | 734.362961         | 14 |
| 9  | <b>882.370033</b>  | 441.688654        |                |                  | <b>864.359468</b>  | 432.683372        | S    | 1398.697183        | 699.852230      | 1381.670634       | 691.338955         | 1380.686618    | 690.846947         | 13 |
| 10 | <b>1019.428945</b> | <b>510.218110</b> |                |                  | 1001.418380        | <b>501.212828</b> | H    | 1311.665155        | 656.336216      | 1294.638606       | 647.822941         | 1293.654590    | 647.330933         | 12 |
| 11 | <b>1120.476624</b> | 560.741950        |                |                  | 1102.466059        | 551.736667        | T    | 1174.606243        | 587.806760      | 1157.579694       | 579.293485         | 1156.595678    | 578.801477         | 11 |
| 12 | 1207.508652        | <b>604.257964</b> |                |                  | 1189.498087        | 595.252681        | S    | <b>1073.558564</b> | 537.282920      | 1056.532015       | 528.769646         | 1055.547999    | 528.277638         | 10 |
| 13 | <b>1264.530116</b> | 632.768696        |                |                  | <b>1246.519551</b> | 623.763413        | G    | <b>986.526536</b>  | 493.766906      | 969.499987        | 485.253632         | 968.515971     | <b>484.761624</b>  | 9  |
| 14 | <b>1377.614180</b> | 689.310728        |                |                  | 1359.603615        | 680.305445        | I    | 929.505072         | 465.256174      | 912.478523        | 456.742900         | 911.494507     | 456.250892         | 8  |
| 15 | 1506.656773        | 753.832024        |                |                  | 1488.646208        | <b>744.826742</b> | E    | <b>816.421008</b>  | 408.714142      | <b>799.394459</b> | <b>400.200868</b>  | 798.410443     | <b>399.708860</b>  | 7  |
| 16 | 1577.693887        | 789.350581        |                |                  | 1559.683322        | 780.345299        | A    | <b>687.378415</b>  | 344.192846      | 670.351866        | 335.679571         | 669.367850     | 335.187563         | 6  |
| 17 | 1692.720830        | <b>846.864053</b> |                |                  | 1674.710265        | 837.858770        | D    | <b>616.341301</b>  | 308.674289      | 599.314752        | 300.161014         | 598.330736     | 299.669006         | 5  |
| 18 | 1793.768509        | 897.387893        |                |                  | 1775.757944        | 888.382610        | T    | <b>501.314358</b>  | 251.160817      | <b>484.287809</b> | 242.647543         | 483.303793     | 242.155535         | 4  |
| 19 | 1921.863472        | 961.435374        | 1904.836923    | 952.922100       | 1903.852907        | 952.430092        | K    | <b>400.266679</b>  | 200.636978      | <b>383.240130</b> | 192.123703         |                |                    | 3  |
| 20 | 2018.916236        | 1009.961756       | 2001.889687    | 1001.448482      | 2000.905671        | 1000.956474       | P    | <b>272.171716</b>  | 136.589496      | <b>255.145167</b> | 128.076222         |                |                    | 2  |
| 21 |                    |                   |                |                  |                    |                   | R    | <b>175.118952</b>  | 88.063114       | 158.092403        | 79.549840          |                |                    | 1  |

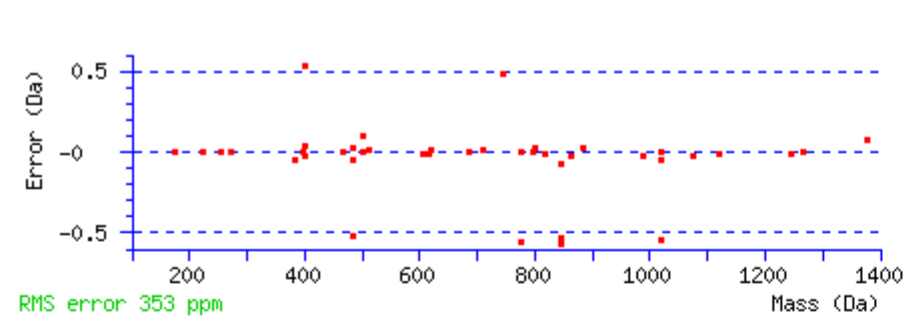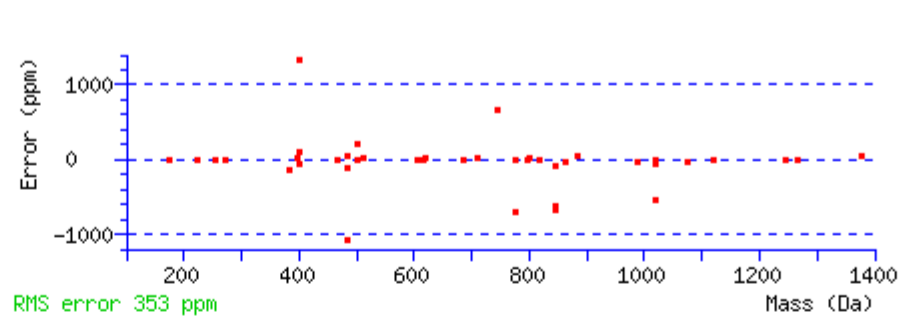

NCBI BLAST search of [HSTASHSSSHTSGIEADTKPR](#)  
 (Parameters: blastp, nr protein database, expect=20000, no filter, PAM30)  
 Other BLAST [web gateways](#)

### All matches to this query

| Score | Mr(calc):   | Delta     | Sequence                              |
|-------|-------------|-----------|---------------------------------------|
| 63.4  | 2192.020630 | -0.006660 | <a href="#">HSTASHSSSHTSGIEADTKPR</a> |
| 3.8   | 2192.031555 | -0.017585 | <a href="#">MAEAVAAPISPWTMAATIQAM</a> |
| 0.9   | 2192.031555 | -0.017585 | <a href="#">MAEAVAAPISPWTMAATIQAM</a> |
| 0.9   | 2192.031555 | -0.017585 | <a href="#">MAEAVAAPISPWTMAATIQAM</a> |
| 0.3   | 2192.015472 | -0.001502 | <a href="#">SPVLSNTTTEPASTMSPPPAK</a> |
| 0.3   | 2192.015472 | -0.001502 | <a href="#">SPVLSNTTTEPASTMSPPPAK</a> |
| 0.3   | 2192.015472 | -0.001502 | <a href="#">SPVLSNTTTEPASTMSPPPAK</a> |

**MATRIX SCIENCE Mascot Search Results**

**Peptide View**

MS/MS Fragmentation of **ADSLLEDITDIPK**

Found in **FERMI\_HUMAN**, Fermitin family homolog 1 OS=Homo sapiens GN=FERMT1 PE=1 SV=1

Match to Query 44088: 1428.742848 from(715.378700,2+) rtinseconds(3667) index(53512)

Title: Locus:1.1.1.2826.26

Data file 2011-11-10 - TFD - EP 3-2.mgf

Click mouse within plot area to zoom in by factor of two about that point

Or, Plot from  to  Da

Label all possible matches  Label matches used for scoring

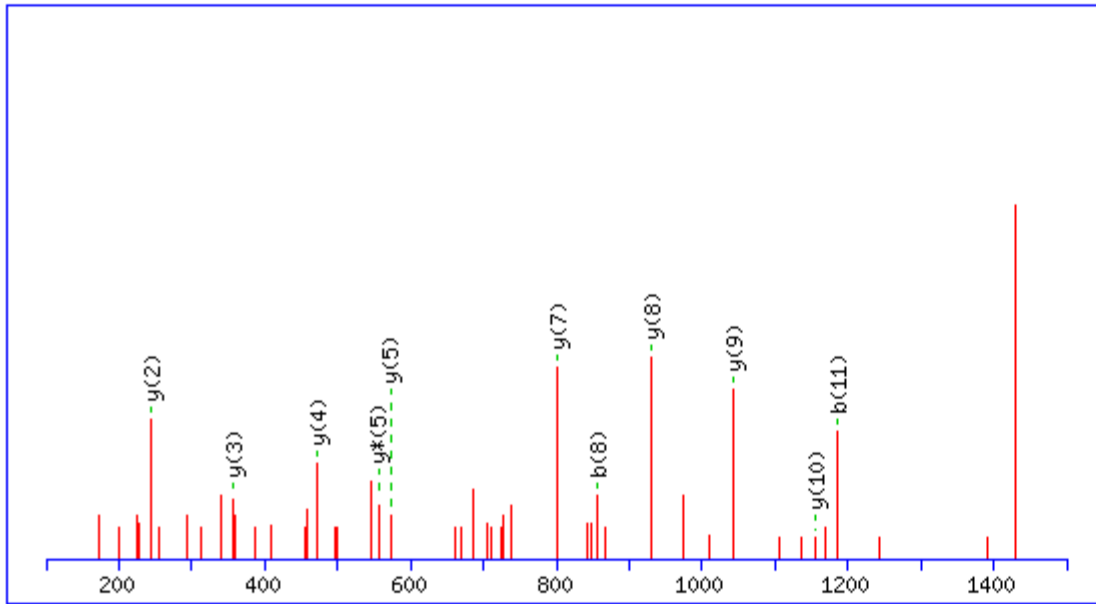

Monoisotopic mass of neutral peptide Mr(calc): 1428.734772

Fixed modifications: Propionamide (C) (apply to specified residues or termini only)

Ions Score: 50 Expect: 0.0001

Matches : 11/112 fragment ions using 22 most intense peaks [\(help\)](#)

| #  | b                  | b <sup>++</sup> | b <sup>0</sup> | b <sup>0++</sup> | Seq. | y                  | y <sup>++</sup> | y <sup>*</sup>    | y <sup>*++</sup> | y <sup>0</sup> | y <sup>0++</sup> | #  |
|----|--------------------|-----------------|----------------|------------------|------|--------------------|-----------------|-------------------|------------------|----------------|------------------|----|
| 1  | 72.044390          | 36.525833       |                |                  | A    |                    |                 |                   |                  |                |                  | 13 |
| 2  | 187.071333         | 94.039304       | 169.060768     | 85.034022        | D    | 1358.704953        | 679.856115      | 1341.678404       | 671.342840       | 1340.694388    | 670.850832       | 12 |
| 3  | 274.103361         | 137.555319      | 256.092796     | 128.550036       | S    | 1243.678010        | 622.342643      | 1226.651461       | 613.829369       | 1225.667445    | 613.337361       | 11 |
| 4  | 387.187425         | 194.097351      | 369.176860     | 185.092068       | L    | <b>1156.645982</b> | 578.826629      | 1139.619433       | 570.313355       | 1138.635417    | 569.821347       | 10 |
| 5  | 500.271489         | 250.639383      | 482.260924     | 241.634100       | L    | <b>1043.561918</b> | 522.284597      | 1026.535369       | 513.771323       | 1025.551353    | 513.279315       | 9  |
| 6  | 629.314082         | 315.160679      | 611.303517     | 306.155397       | E    | <b>930.477854</b>  | 465.742565      | 913.451305        | 457.229291       | 912.467289     | 456.737283       | 8  |
| 7  | 744.341025         | 372.674151      | 726.330460     | 363.668868       | D    | <b>801.435261</b>  | 401.221269      | 784.408712        | 392.707994       | 783.424696     | 392.215986       | 7  |
| 8  | <b>857.425089</b>  | 429.216183      | 839.414524     | 420.210900       | I    | 686.408318         | 343.707797      | 669.381769        | 335.194523       | 668.397753     | 334.702515       | 6  |
| 9  | 958.472768         | 479.740022      | 940.462203     | 470.734740       | T    | <b>573.324254</b>  | 287.165765      | <b>556.297705</b> | 278.652491       | 555.313689     | 278.160483       | 5  |
| 10 | 1073.499711        | 537.253494      | 1055.489146    | 528.248211       | D    | <b>472.276575</b>  | 236.641925      | 455.250026        | 228.128651       | 454.266010     | 227.636643       | 4  |
| 11 | <b>1186.583775</b> | 593.795526      | 1168.573210    | 584.790243       | I    | <b>357.249632</b>  | 179.128454      | 340.223083        | 170.615179       |                |                  | 3  |
| 12 | 1283.636539        | 642.321908      | 1265.625974    | 633.316625       | P    | <b>244.165568</b>  | 122.586422      | 227.139019        | 114.073148       |                |                  | 2  |
| 13 |                    |                 |                |                  | K    | 147.112804         | 74.060040       | 130.086255        | 65.546765        |                |                  | 1  |

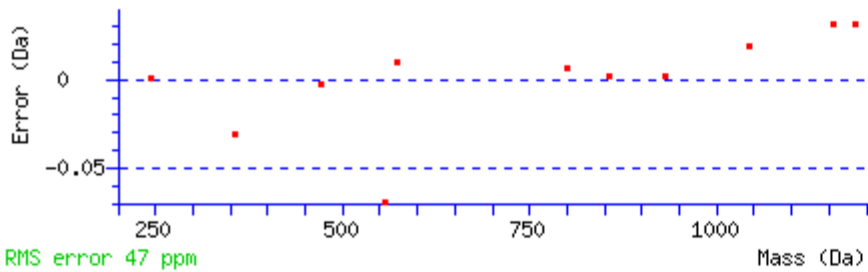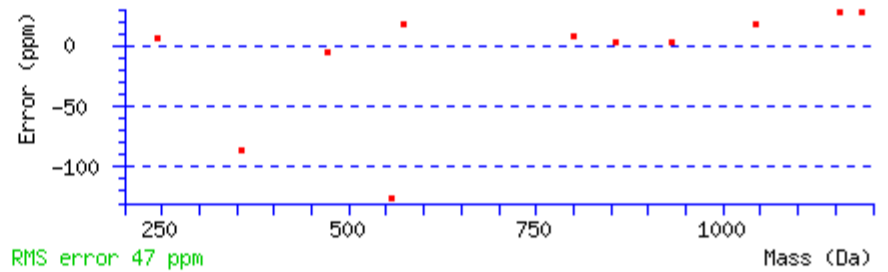

NCBI BLAST search of **ADSLLEDITDIPK**

(Parameters: blastp, nr protein database, expect=20000, no filter, PAM30)

Other BLAST [web gateways](#)

**All matches to this query**

| Score | Mr(calc):   | Delta     | Sequence                      |
|-------|-------------|-----------|-------------------------------|
| 50.4  | 1428.734772 | 0.008076  | <a href="#">ADSLLEDITDIPK</a> |
| 7.4   | 1428.736084 | 0.006764  | <a href="#">ENLYPKANIPDR</a>  |
| 3.1   | 1428.747345 | -0.004497 | <a href="#">RSPNVELSFPQR</a>  |
| 1.6   | 1428.739502 | 0.003346  | <a href="#">ASCPGKISVPPVR</a> |

# MASCOT SCIENCE Mascot Search Results

## Peptide View

MS/MS Fragmentation of **YLPFVPSR**

Found in **FMOD\_HUMAN**, Fibromodulin OS=Homo sapiens GN=FMOD PE=1 SV=2

Match to Query 231696: 977.536448 from(489.775500,2+) rtinseconds(2731) index(689664)

Title: Locus:1.1.1.1711.12

Data file C:\Program Files (x86)\Matrix Science\Mascot Daemon\mgf3 TFD - Epitel - R2\mascot\_daemon\_merge.mgf

Click mouse within plot area to zoom in by factor of two about that point

Or, Plot from  to  Da

Label all possible matches  Label matches used for scoring

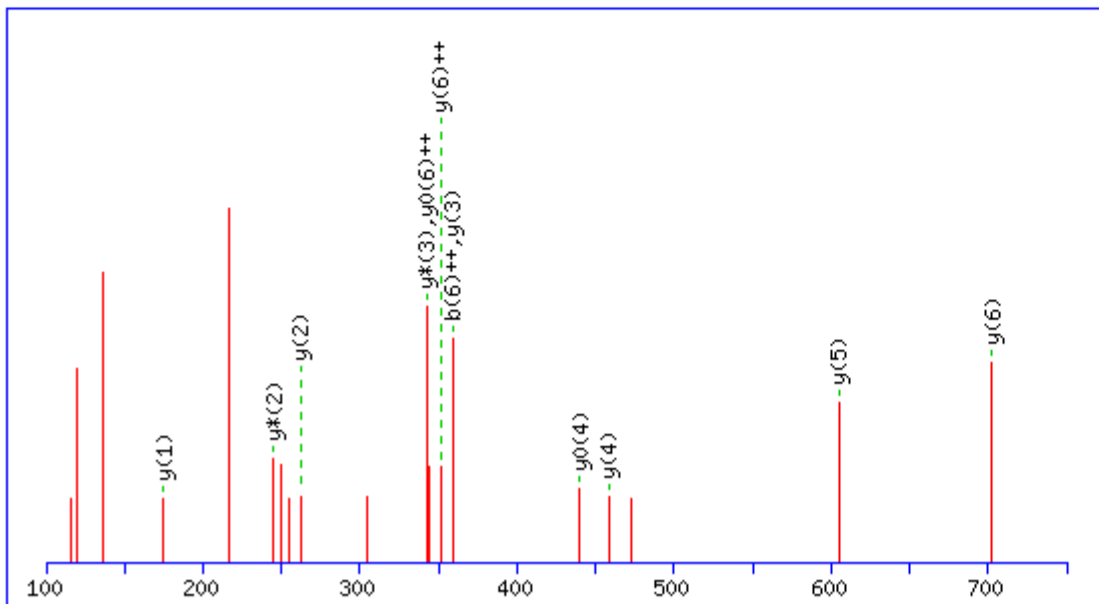

Monoisotopic mass of neutral peptide Mr(calc): 977.533447

Fixed modifications: Carbamidomethyl (C) (apply to specified residues or termini only)

Ions Score: 41 Expect: 0.00077

Matches : 12/56 fragment ions using 17 most intense peaks [\(help\)](#)

| # | b          | b <sup>++</sup> | b <sup>0</sup> | b <sup>0++</sup> | Seq. | y          | y <sup>++</sup> | y <sup>*</sup> | y <sup>*++</sup> | y <sup>0</sup> | y <sup>0++</sup> | # |
|---|------------|-----------------|----------------|------------------|------|------------|-----------------|----------------|------------------|----------------|------------------|---|
| 1 | 164.070605 | 82.538940       |                |                  | Y    |            |                 |                |                  |                |                  | 8 |
| 2 | 277.154669 | 139.080973      |                |                  | L    | 815.477400 | 408.242338      | 798.450851     | 399.729064       | 797.466835     | 399.237056       | 7 |
| 3 | 374.207433 | 187.607354      |                |                  | P    | 702.393336 | 351.700306      | 685.366787     | 343.187032       | 684.382771     | 342.695024       | 6 |
| 4 | 521.275847 | 261.141562      |                |                  | F    | 605.340572 | 303.173924      | 588.314023     | 294.660650       | 587.330007     | 294.168642       | 5 |
| 5 | 620.344261 | 310.675769      |                |                  | V    | 458.272158 | 229.639717      | 441.245609     | 221.126443       | 440.261593     | 220.634435       | 4 |
| 6 | 717.397025 | 359.202151      |                |                  | P    | 359.203744 | 180.105510      | 342.177195     | 171.592236       | 341.193179     | 171.100228       | 3 |
| 7 | 804.429053 | 402.718165      | 786.418488     | 393.712882       | S    | 262.150980 | 131.579128      | 245.124431     | 123.065854       | 244.140415     | 122.573846       | 2 |
| 8 |            |                 |                |                  | R    | 175.118952 | 88.063114       | 158.092403     | 79.549840        |                |                  | 1 |

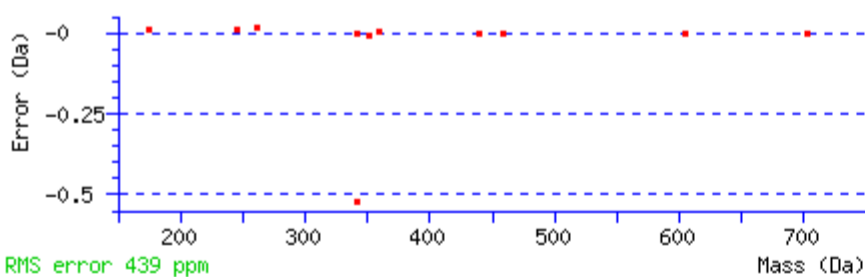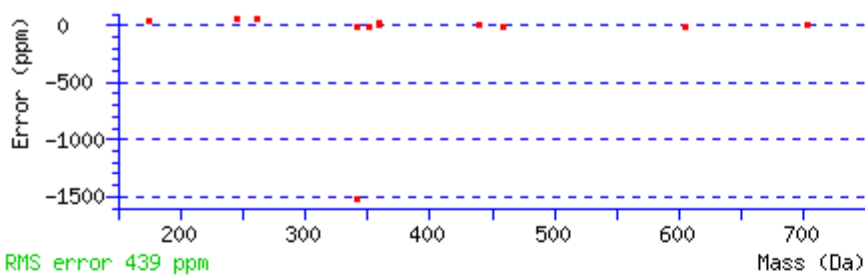

NCBI BLAST search of **YLPFVPSR**

(Parameters: blastp, nr protein database, expect=20000, no filter, PAM30)

Other BLAST [web gateways](#)

## All matches to this query

| Score | Mr(calc):  | Delta     | Sequence                  |
|-------|------------|-----------|---------------------------|
| 40.8  | 977.533447 | 0.003001  | <a href="#">YLPFVPSR</a>  |
| 13.2  | 977.529419 | 0.007029  | <a href="#">VGNYLIGSR</a> |
| 12.1  | 977.544678 | -0.008230 | <a href="#">VGIYGWRK</a>  |
| 9.3   | 977.529404 | 0.007044  | <a href="#">IYPSKTNR</a>  |
| 9.1   | 977.529419 | 0.007029  | <a href="#">IYNGIGVSR</a> |
| 7.6   | 977.529404 | 0.007044  | <a href="#">YIQAKPSR</a>  |
| 7.6   | 977.529404 | 0.007044  | <a href="#">YLQPAKSR</a>  |
| 4.3   | 977.540649 | -0.004201 | <a href="#">LQGALHPAR</a> |
| 1.4   | 977.544662 | -0.008214 | <a href="#">IRYYVHK</a>   |
| 0.5   | 977.529419 | 0.007029  | <a href="#">ISWTTKSR</a>  |

# MATRIX SCIENCE Mascot Search Results

## Peptide View

MS/MS Fragmentation of **EGMLMKIK**

Found in **FSD1\_HUMAN**, Fibronectin type III and SPRY domain-containing protein 1 OS=Homo sapiens GN=FSD1 PE=1 SV=1

Match to Query 13745: 980.503788 from(491.259170,2+) rtinseconds(2274) index(28193)

Title: Locus:1.1.1.2193.14

Data file 2011-11-10 - TFD - EP 4-4.mgf

Click mouse within plot area to zoom in by factor of two about that point

Or, Plot from  to  Da

Label all possible matches  Label matches used for scoring

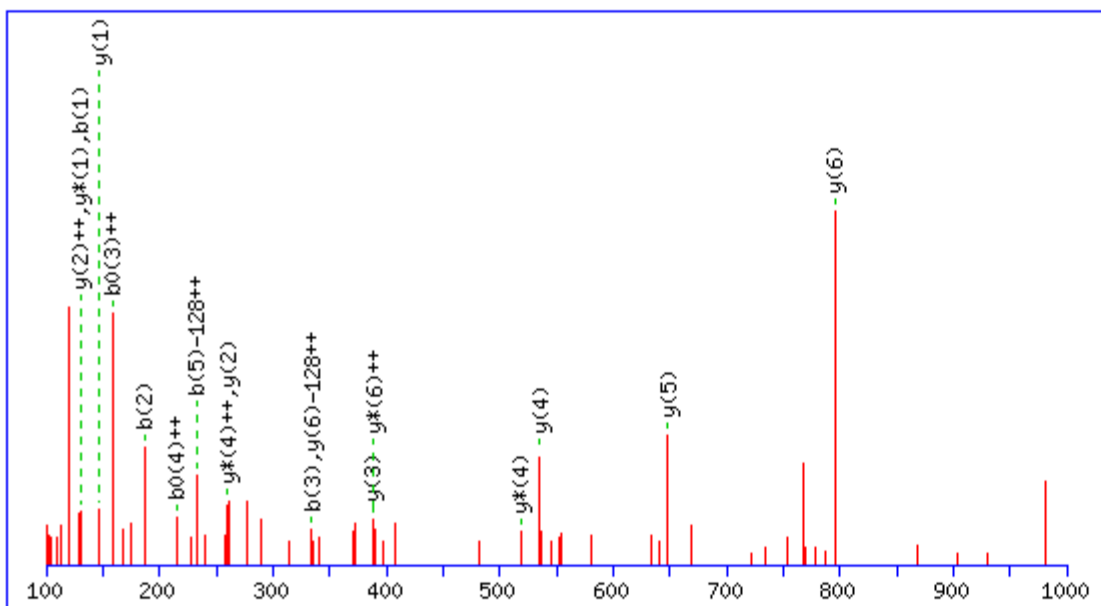

Monoisotopic mass of neutral peptide Mr(calc): 980.503448

Fixed modifications: Propionamide (C) (apply to specified residues or termini only)

Variable modifications:

M3 : Oxidation (M), with neutral losses 0.000000 (shown in table), 63.998285

M5 : Oxidation (M), with neutral losses 0.000000 (shown in table), 63.998285

Ions Score: 31 Expect: 0.0084

Matches : 18/100 fragment ions using 34 most intense peaks ([help](#))

| # | b          | b <sup>++</sup> | b*         | b <sup>*++</sup> | b <sup>0</sup> | b <sup>0++</sup> | Seq. | y          | y <sup>++</sup> | y*         | y <sup>*++</sup> | # |
|---|------------|-----------------|------------|------------------|----------------|------------------|------|------------|-----------------|------------|------------------|---|
| 1 | 130.049869 | 65.528572       |            |                  | 112.039304     | 56.523290        | E    |            |                 |            |                  | 8 |
| 2 | 187.071333 | 94.039305       |            |                  | 169.060768     | 85.034022        | G    | 852.468159 | 426.737718      | 835.441610 | 418.224443       | 7 |
| 3 | 334.106733 | 167.557005      |            |                  | 316.096168     | 158.551722       | M    | 795.446695 | 398.226986      | 778.420146 | 389.713711       | 6 |
| 4 | 447.190797 | 224.099037      |            |                  | 429.180232     | 215.093754       | L    | 648.411295 | 324.709286      | 631.384746 | 316.196011       | 5 |
| 5 | 594.226197 | 297.616737      |            |                  | 576.215632     | 288.611454       | M    | 535.327231 | 268.167254      | 518.300682 | 259.653979       | 4 |
| 6 | 722.321160 | 361.664218      | 705.294611 | 353.150944       | 704.310595     | 352.658936       | K    | 388.291831 | 194.649554      | 371.265282 | 186.136279       | 3 |
| 7 | 835.405224 | 418.206250      | 818.378675 | 409.692976       | 817.394659     | 409.200968       | I    | 260.196868 | 130.602072      | 243.170319 | 122.088798       | 2 |
| 8 |            |                 |            |                  |                |                  | K    | 147.112804 | 74.060040       | 130.086255 | 65.546765        | 1 |

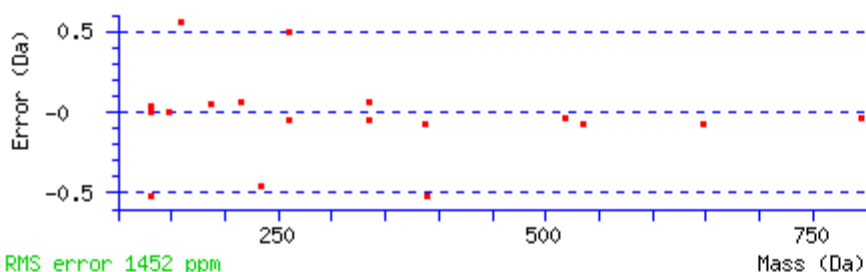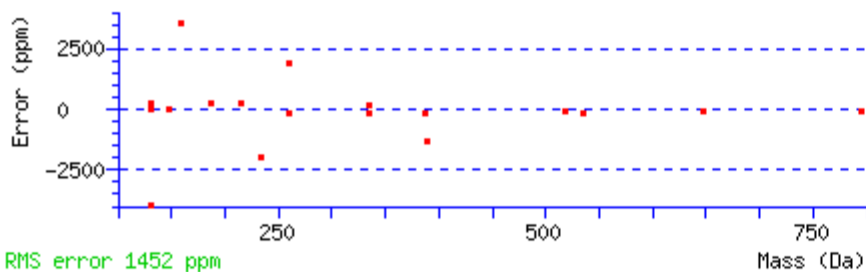

NCBI BLAST search of [EGMLMKIK](#)

(Parameters: blastp, nr protein database, expect=20000, no filter, PAM30)

Other BLAST [web gateways](#)

## All matches to this query

| Score | Mr(calc):  | Delta     | Sequence                  |
|-------|------------|-----------|---------------------------|
| 30.9  | 980.503448 | 0.000340  | <a href="#">EGMLMKIK</a>  |
| 22.2  | 980.500092 | 0.003696  | <a href="#">SVFLEQMK</a>  |
| 10.5  | 980.500076 | 0.003712  | <a href="#">LSIFMENK</a>  |
| 7.6   | 980.500092 | 0.003696  | <a href="#">DPMSFKLK</a>  |
| 6.4   | 980.511978 | -0.008190 | <a href="#">WKYPFPK</a>   |
| 3.5   | 980.503464 | 0.000324  | <a href="#">LTVLNMMK</a>  |
| 3.0   | 980.511307 | -0.007519 | <a href="#">LMEKFAAR</a>  |
| 2.4   | 980.500092 | 0.003696  | <a href="#">ISPFSCCLK</a> |
| 1.0   | 980.500092 | 0.003696  | <a href="#">DPMSFKLK</a>  |
| 0.8   | 980.511322 | -0.007534 | <a href="#">ILSFNTMR</a>  |

# MASCOT SCIENCE Mascot Search Results

## Peptide View

MS/MS Fragmentation of **DQPFTILYR**

Found in **FBLN5\_HUMAN**, Fibulin-5 OS=Homo sapiens GN=FBLN5 PE=1 SV=1

Match to Query 460860: 1151.596688 from(576.805620,2+) rtinseconds(3071) index(935232)

Title: Locus:1.1.1.1573.23

Data file C:\Program Files (x86)\Matrix Science\Mascot Daemon\mgf\3 TFD - Epitel - R2\mascot\_daemon\_merge.mgf

Click mouse within plot area to zoom in by factor of two about that point

Or,   to  Da

Label all possible matches  Label matches used for scoring

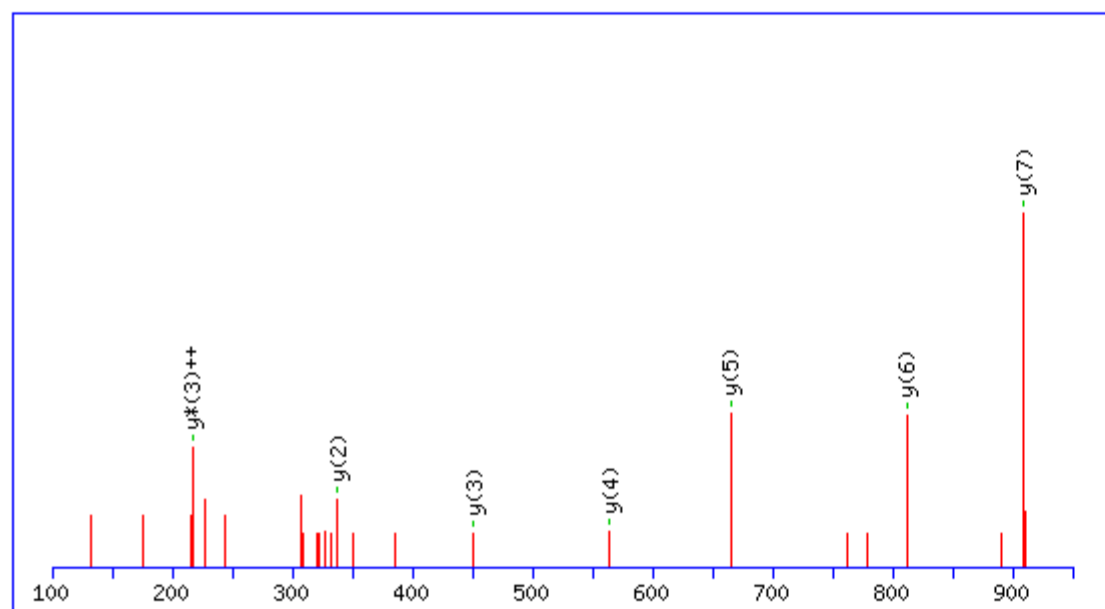

Monoisotopic mass of neutral peptide Mr(calc): 1151.597504

Fixed modifications: Carbamidomethyl (C) (apply to specified residues or termini only)

Ions Score: 56 Expect: 9e-006

Matches : 7/86 fragment ions using 8 most intense peaks ([help](#))

| # | b          | b <sup>++</sup> | b <sup>*</sup> | b <sup>*++</sup> | b <sup>0</sup> | b <sup>0++</sup> | Seq. | y                 | y <sup>++</sup> | y <sup>*</sup> | y <sup>*++</sup>  | y <sup>0</sup> | y <sup>0++</sup> | # |
|---|------------|-----------------|----------------|------------------|----------------|------------------|------|-------------------|-----------------|----------------|-------------------|----------------|------------------|---|
| 1 | 116.034219 | 58.520748       |                |                  | 98.023654      | 49.515465        | D    |                   |                 |                |                   |                |                  | 9 |
| 2 | 244.092797 | 122.550037      | 227.066248     | 114.036762       | 226.082232     | 113.544754       | Q    | 1037.577844       | 519.292560      | 1020.551295    | 510.779286        | 1019.567279    | 510.287278       | 8 |
| 3 | 341.145561 | 171.076418      | 324.119012     | 162.563144       | 323.134996     | 162.071136       | P    | <b>909.519266</b> | 455.263271      | 892.492717     | 446.749997        | 891.508701     | 446.257989       | 7 |
| 4 | 488.213975 | 244.610625      | 471.187426     | 236.097351       | 470.203410     | 235.605343       | F    | <b>812.466502</b> | 406.736889      | 795.439953     | 398.223615        | 794.455937     | 397.731607       | 6 |
| 5 | 589.261654 | 295.134465      | 572.235105     | 286.621191       | 571.251089     | 286.129183       | T    | <b>665.398088</b> | 333.202682      | 648.371539     | 324.689408        | 647.387523     | 324.197400       | 5 |
| 6 | 702.345718 | 351.676497      | 685.319169     | 343.163223       | 684.335153     | 342.671215       | I    | <b>564.350409</b> | 282.678843      | 547.323860     | 274.165568        |                |                  | 4 |
| 7 | 815.429782 | 408.218529      | 798.403233     | 399.705255       | 797.419217     | 399.213247       | L    | <b>451.266345</b> | 226.136810      | 434.239796     | <b>217.623536</b> |                |                  | 3 |
| 8 | 978.493111 | 489.750194      | 961.466562     | 481.236919       | 960.482546     | 480.744911       | Y    | <b>338.182281</b> | 169.594778      | 321.155732     | 161.081504        |                |                  | 2 |
| 9 |            |                 |                |                  |                |                  | R    | 175.118952        | 88.063114       | 158.092403     | 79.549839         |                |                  | 1 |

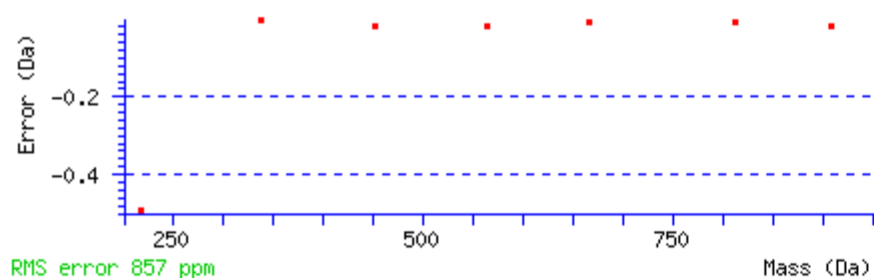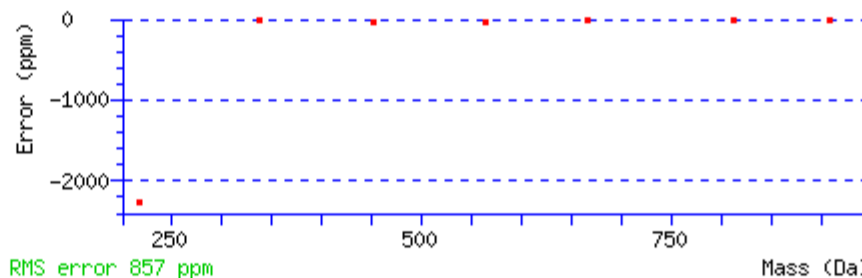

NCBI BLAST search of [DQPFTILYR](#)

(Parameters: blastp, nr protein database, expect=20000, no filter, PAM30)

Other BLAST [web gateways](#)

All matches to this query

| Score | Mr(calc):   | Delta     | Sequence                   |
|-------|-------------|-----------|----------------------------|
| 56.4  | 1151.597504 | -0.000816 | <a href="#">DQPFTILYR</a>  |
| 2.6   | 1151.604706 | -0.008018 | <a href="#">RSSLHSQPPK</a> |

Mascot: <http://www.matrixscience.com/>

# **MATRIX** SCIENCE Mascot Search Results

## Peptide View

### MS/MS Fragmentation of **QLQQLLK**

Found in **FBLN7\_HUMAN**, Fibulin-7 OS=Homo sapiens GN=FBLN7 PE=2 SV=1

Match to Query 4558: 869.539308 from(435.776930,2+) rtinseconds(1635) index(4252)

Title: Locus:1.1.1.2279.5

Data file 2011-11-13 - TFD - EP 7-8.mgf

Click mouse within plot area to zoom in by factor of two about that point

Or, Plot from  to  Da

Label all possible matches  Label matches used for scoring

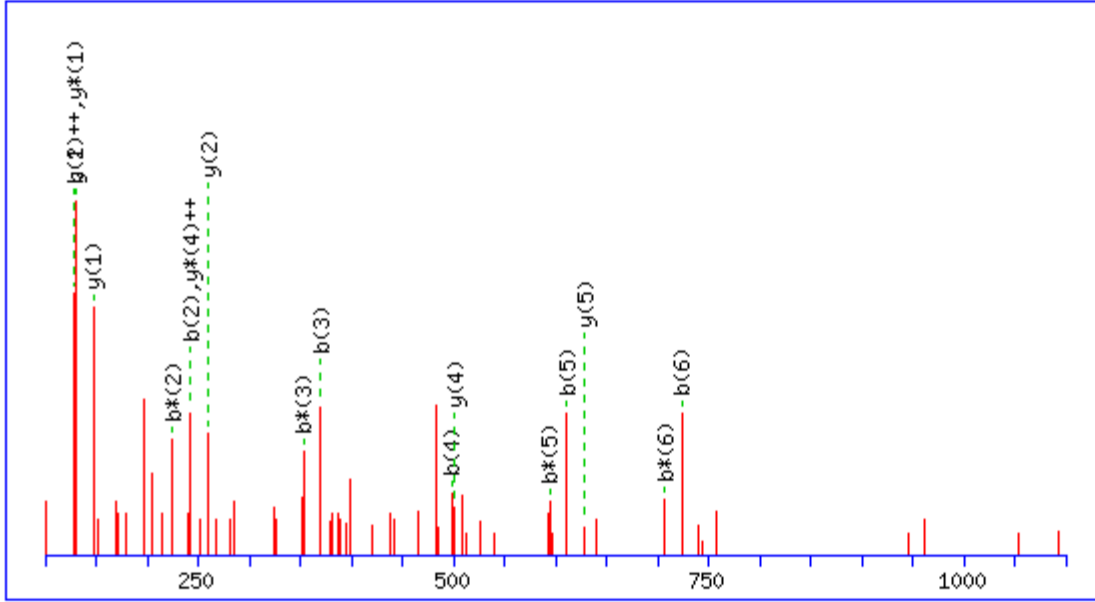

Monoisotopic mass of neutral peptide Mr(calc): 869.533432

Fixed modifications: Propionamide (C) (apply to specified residues or termini only)

Ions Score: 49 Expect: 9.6e-005

Matches : 17/48 fragment ions using 21 most intense peaks ([help](#))

| # | b                 | b <sup>++</sup> | b <sup>*</sup>    | b <sup>*++</sup> | Seq. | y                 | y <sup>++</sup>   | y <sup>*</sup>    | y <sup>*++</sup>  | # |
|---|-------------------|-----------------|-------------------|------------------|------|-------------------|-------------------|-------------------|-------------------|---|
| 1 | <b>129.065854</b> | 65.036565       | 112.039305        | 56.523291        | Q    |                   |                   |                   |                   | 7 |
| 2 | <b>242.149918</b> | 121.578597      | <b>225.123369</b> | 113.065323       | L    | 742.482152        | 371.744714        | 725.455603        | 363.231440        | 6 |
| 3 | <b>370.208496</b> | 185.607886      | <b>353.181947</b> | 177.094612       | Q    | <b>629.398088</b> | 315.202682        | 612.371539        | 306.689408        | 5 |
| 4 | <b>498.267074</b> | 249.637175      | 481.240525        | 241.123901       | Q    | <b>501.339510</b> | 251.173393        | 484.312961        | <b>242.660119</b> | 4 |
| 5 | <b>611.351138</b> | 306.179207      | <b>594.324589</b> | 297.665933       | L    | 373.280932        | 187.144104        | 356.254383        | 178.630830        | 3 |
| 6 | <b>724.435202</b> | 362.721239      | <b>707.408653</b> | 354.207965       | L    | <b>260.196868</b> | <b>130.602072</b> | 243.170319        | 122.088798        | 2 |
| 7 |                   |                 |                   |                  | K    | <b>147.112804</b> | 74.060040         | <b>130.086255</b> | 65.546765         | 1 |

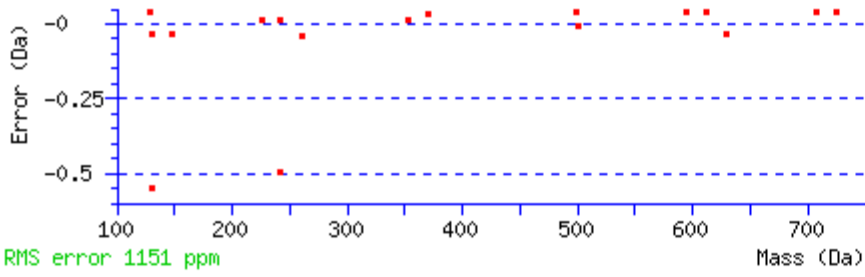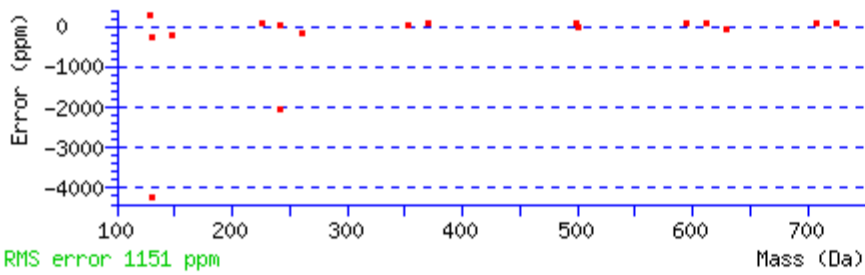

### NCBI BLAST search of **QLQQLLK**

(Parameters: blastp, nr protein database, expect=20000, no filter, PAM30)

Other BLAST [web gateways](#)

### All matches to this query

| Score | Mr(calc):  | Delta     | Sequence                 |
|-------|------------|-----------|--------------------------|
| 49.3  | 869.533432 | 0.005876  | <a href="#">KPKPKPK</a>  |
| 49.3  | 869.533432 | 0.005876  | <a href="#">QPQLKLK</a>  |
| 49.1  | 869.533432 | 0.005876  | <a href="#">QLQQLLK</a>  |
| 41.3  | 869.533432 | 0.005876  | <a href="#">LKQIGALQ</a> |
| 34.0  | 869.533432 | 0.005876  | <a href="#">KAAVPQIK</a> |
| 33.7  | 869.533432 | 0.005876  | <a href="#">QQLQLLK</a>  |
| 31.5  | 869.533432 | 0.005876  | <a href="#">KPLKQPK</a>  |
| 31.4  | 869.533432 | 0.005876  | <a href="#">KLQPIQK</a>  |
| 21.4  | 869.544662 | -0.005354 | <a href="#">QRPTKLK</a>  |
| 20.9  | 869.533432 | 0.005876  | <a href="#">QKLLGPSK</a> |



# MASCOT Search Results

## Peptide View

MS/MS Fragmentation of **GILLFGPPGTGK**

Found in **FIGL1\_HUMAN**, Fidgetin-like protein 1 OS=Homo sapiens GN=FIGNL1 PE=1 SV=2

Match to Query 25864: 1155.666708 from(578.840630,2+) rtinseconds(3085) index(42860)

Title: Locus:1.1.1.2602.14

Data file 2011-11-13 - TFD - EP 7-4.mgf

Click mouse within plot area to zoom in by factor of two about that point

Or, Plot from  to  Da

Label all possible matches  Label matches used for scoring

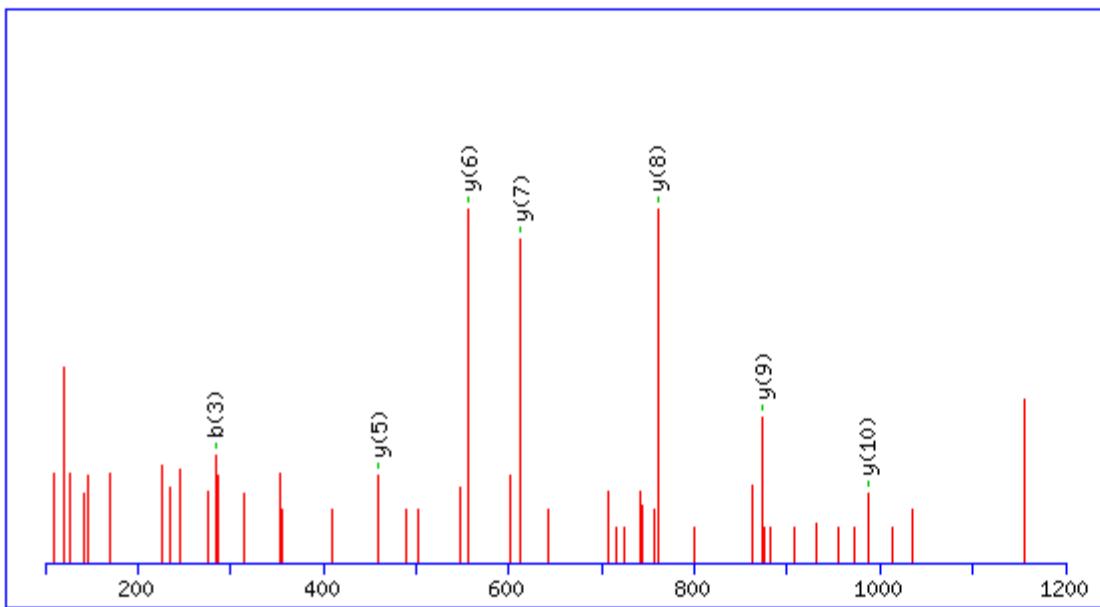

Monoisotopic mass of neutral peptide Mr(calc): 1155.665207

Fixed modifications: Propionamide (C) (apply to specified residues or termini only)

Ions Score: 42 Expect: 0.0002

Matches : 7/88 fragment ions using 10 most intense peaks [\(help\)](#)

| #  | b                 | b <sup>++</sup> | b <sup>0</sup> | b <sup>0++</sup> | Seq.     | y                 | y <sup>++</sup> | y <sup>*</sup> | y <sup>*++</sup> | y <sup>0</sup> | y <sup>0++</sup> | #         |
|----|-------------------|-----------------|----------------|------------------|----------|-------------------|-----------------|----------------|------------------|----------------|------------------|-----------|
| 1  | 58.028740         | 29.518008       |                |                  | <b>G</b> |                   |                 |                |                  |                |                  | <b>12</b> |
| 2  | 171.112804        | 86.060040       |                |                  | <b>I</b> | 1099.651009       | 550.329143      | 1082.624460    | 541.815868       | 1081.640444    | 541.323860       | <b>11</b> |
| 3  | <b>284.196868</b> | 142.602072      |                |                  | <b>L</b> | <b>986.566945</b> | 493.787111      | 969.540396     | 485.273836       | 968.556380     | 484.781828       | <b>10</b> |
| 4  | 397.280932        | 199.144104      |                |                  | <b>L</b> | <b>873.482881</b> | 437.245079      | 856.456332     | 428.731804       | 855.472316     | 428.239796       | <b>9</b>  |
| 5  | 544.349346        | 272.678311      |                |                  | <b>F</b> | <b>760.398817</b> | 380.703047      | 743.372268     | 372.189772       | 742.388252     | 371.697764       | <b>8</b>  |
| 6  | 601.370810        | 301.189043      |                |                  | <b>G</b> | <b>613.330403</b> | 307.168840      | 596.303854     | 298.655565       | 595.319838     | 298.163557       | <b>7</b>  |
| 7  | 698.423574        | 349.715425      |                |                  | <b>P</b> | <b>556.308939</b> | 278.658108      | 539.282390     | 270.144833       | 538.298374     | 269.652825       | <b>6</b>  |
| 8  | 795.476338        | 398.241807      |                |                  | <b>P</b> | <b>459.256175</b> | 230.131726      | 442.229626     | 221.618451       | 441.245610     | 221.126443       | <b>5</b>  |
| 9  | 852.497802        | 426.752539      |                |                  | <b>G</b> | 362.203411        | 181.605344      | 345.176862     | 173.092069       | 344.192846     | 172.600061       | <b>4</b>  |
| 10 | 953.545481        | 477.276379      | 935.534916     | 468.271096       | <b>T</b> | 305.181947        | 153.094612      | 288.155398     | 144.581337       | 287.171382     | 144.089329       | <b>3</b>  |
| 11 | 1010.566945       | 505.787111      | 992.556380     | 496.781828       | <b>G</b> | 204.134268        | 102.570772      | 187.107719     | 94.057498        |                |                  | <b>2</b>  |
| 12 |                   |                 |                |                  | <b>K</b> | 147.112804        | 74.060040       | 130.086255     | 65.546765        |                |                  | <b>1</b>  |

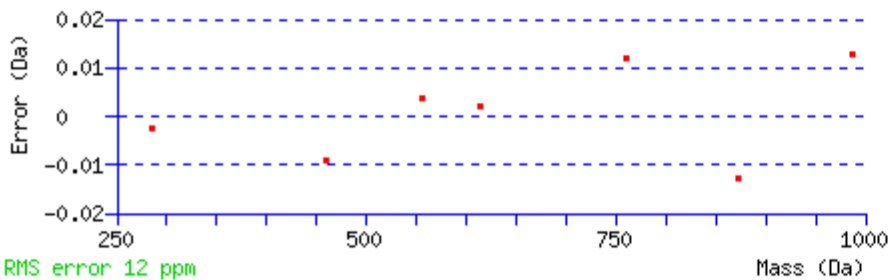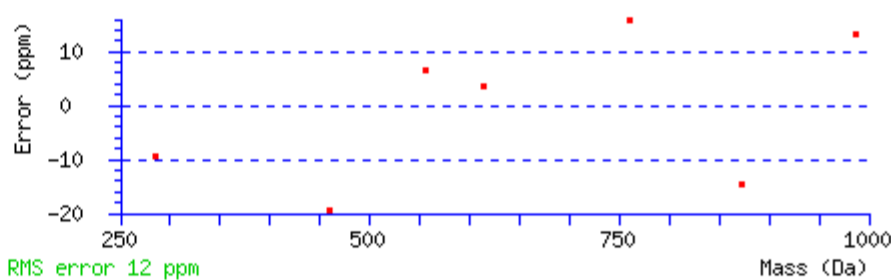

NCBI BLAST search of [GILLFGPPGTGK](#)

(Parameters: blastp, nr protein database, expect=20000, no filter, PAM30)

Other BLAST [web gateways](#)

All matches to this query

| Score | Mr(calc):   | Delta    | Sequence                     |
|-------|-------------|----------|------------------------------|
| 41.6  | 1155.665207 | 0.001501 | <a href="#">GILLFGPPGTGK</a> |
| 2.3   | 1155.661148 | 0.005560 | <a href="#">GLIGPEKLASR</a>  |

**Peptide View**

MS/MS Fragmentation of **EAHQLFLEPEVLDPEVELK**  
 Found in **FENI\_HUMAN**, Flap endonuclease 1 OS=Homo sapiens GN=FEN1 PE=1 SV=1

Match to Query 73332: 2321.175642 from(774.732490,3+) rtinseconds(3486) index(50070)  
 Title: Locus:1.1.1.2739.34  
 Data file 2011-11-12 - TFD - EP 5-4.mgf

Click mouse within plot area to zoom in by factor of two about that point  
 Or, Plot from  to  Da   
 Label all possible matches  Label matches used for scoring

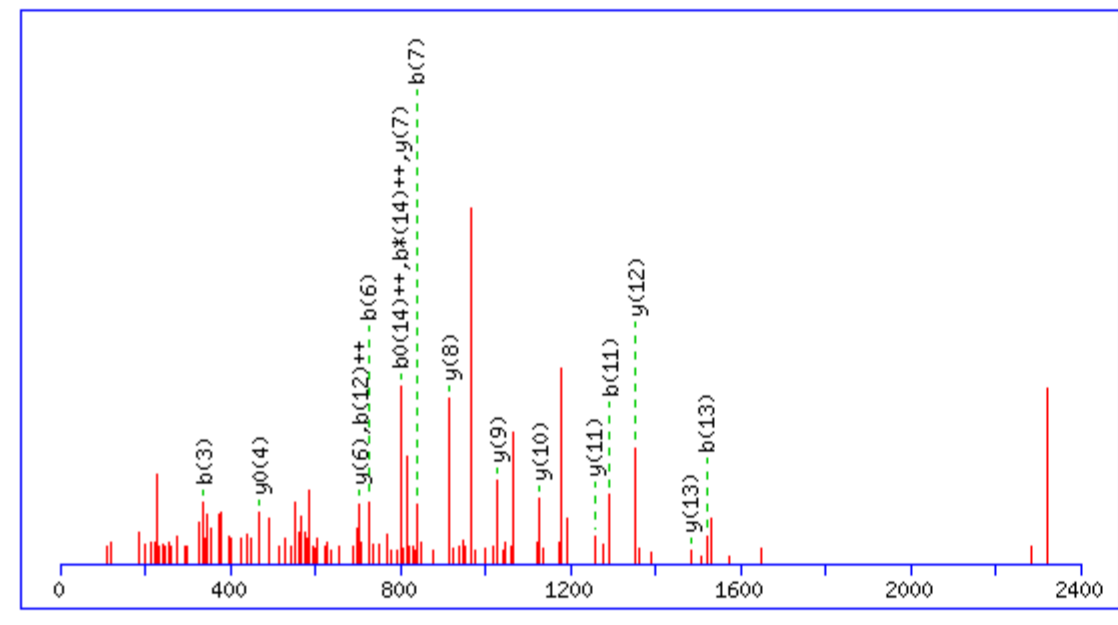

Monoisotopic mass of neutral peptide Mr(calc): 2321.179062  
 Fixed modifications: Propionamide (C) (apply to specified residues or termini only)  
 Ions Score: 32 Expect: 0.0017  
 Matches : 17/218 fragment ions using 32 most intense peaks [\(help\)](#)

| #  | b                  | b <sup>++</sup>   | b <sup>*</sup> | b <sup>+++</sup>  | b <sup>0</sup> | b <sup>0++</sup>  | Seq. | y                  | y <sup>++</sup> | y <sup>*</sup> | y <sup>+++</sup> | y <sup>0</sup>    | y <sup>0++</sup> | #  |
|----|--------------------|-------------------|----------------|-------------------|----------------|-------------------|------|--------------------|-----------------|----------------|------------------|-------------------|------------------|----|
| 1  | 130.049869         | 65.528572         |                |                   | 112.039304     | 56.523290         | E    |                    |                 |                |                  |                   |                  | 20 |
| 2  | 201.086983         | 101.047130        |                |                   | 183.076418     | 92.041847         | A    | 2193.143777        | 1097.075526     | 2176.117228    | 1088.562252      | 2175.133212       | 1088.070244      | 19 |
| 3  | <b>338.145895</b>  | 169.576585        |                |                   | 320.135330     | 160.571303        | H    | 2122.106663        | 1061.556969     | 2105.080114    | 1053.043695      | 2104.096098       | 1052.551687      | 18 |
| 4  | 466.204473         | 233.605875        | 449.177924     | 225.092600        | 448.193908     | 224.600592        | Q    | 1985.047751        | 993.027514      | 1968.021202    | 984.514239       | 1967.037186       | 984.022231       | 17 |
| 5  | 579.288537         | 290.147907        | 562.261988     | 281.634632        | 561.277972     | 281.142624        | L    | 1856.989173        | 928.998225      | 1839.962624    | 920.484950       | 1838.978608       | 919.992942       | 16 |
| 6  | <b>726.356951</b>  | 363.682114        | 709.330402     | 355.168839        | 708.346386     | 354.676831        | F    | 1743.905109        | 872.456193      | 1726.878560    | 863.942918       | 1725.894544       | 863.450910       | 15 |
| 7  | <b>839.441015</b>  | 420.224146        | 822.414466     | 411.710871        | 821.430450     | 411.218863        | L    | 1596.836695        | 798.921986      | 1579.810146    | 790.408711       | 1578.826130       | 789.916703       | 14 |
| 8  | 968.483608         | 484.745442        | 951.457059     | 476.232168        | 950.473043     | 475.740160        | E    | <b>1483.752631</b> | 742.379954      | 1466.726082    | 733.866679       | 1465.742066       | 733.374671       | 13 |
| 9  | 1065.536372        | 533.271824        | 1048.509823    | 524.758550        | 1047.525807    | 524.266542        | P    | <b>1354.710038</b> | 677.858657      | 1337.683489    | 669.345383       | 1336.699473       | 668.853375       | 12 |
| 10 | 1194.578965        | 597.793120        | 1177.552416    | 589.279846        | 1176.568400    | 588.787838        | E    | <b>1257.657274</b> | 629.332275      | 1240.630725    | 620.819001       | 1239.646709       | 620.326993       | 11 |
| 11 | <b>1293.647379</b> | 647.327328        | 1276.620830    | 638.814053        | 1275.636814    | 638.322045        | V    | <b>1128.614681</b> | 564.810979      | 1111.588132    | 556.297704       | 1110.604116       | 555.805696       | 10 |
| 12 | 1406.731443        | <b>703.869359</b> | 1389.704894    | 695.356085        | 1388.720878    | 694.864077        | L    | <b>1029.546267</b> | 515.276772      | 1012.519718    | 506.763497       | 1011.535702       | 506.271489       | 9  |
| 13 | <b>1521.758386</b> | 761.382831        | 1504.731837    | 752.869557        | 1503.747821    | 752.377548        | D    | <b>916.462203</b>  | 458.734740      | 899.435654     | 450.221465       | 898.451638        | 449.729457       | 8  |
| 14 | 1618.811150        | 809.909213        | 1601.784601    | <b>801.395939</b> | 1600.800585    | <b>800.903931</b> | P    | <b>801.435260</b>  | 401.221268      | 784.408711     | 392.707994       | 783.424695        | 392.215986       | 7  |
| 15 | 1747.853743        | 874.430509        | 1730.827194    | 865.917235        | 1729.843178    | 865.425227        | E    | <b>704.382496</b>  | 352.694886      | 687.355947     | 344.181612       | 686.371931        | 343.689604       | 6  |
| 16 | 1834.885771        | 917.946524        | 1817.859222    | 909.433249        | 1816.875206    | 908.941241        | S    | 575.339903         | 288.173590      | 558.313354     | 279.660315       | 557.329338        | 279.168307       | 5  |
| 17 | 1933.954185        | 967.480731        | 1916.927636    | 958.967456        | 1915.943620    | 958.475448        | V    | 488.307875         | 244.657576      | 471.281326     | 236.144301       | <b>470.297310</b> | 235.652293       | 4  |
| 18 | 2062.996778        | 1032.002027       | 2045.970229    | 1023.488752       | 2044.986213    | 1022.996744       | E    | 389.239461         | 195.123369      | 372.212912     | 186.610094       | 371.228896        | 186.118086       | 3  |
| 19 | 2176.080842        | 1088.544059       | 2159.054293    | 1080.030784       | 2158.070277    | 1079.538776       | L    | 260.196868         | 130.602072      | 243.170319     | 122.088798       |                   |                  | 2  |
| 20 |                    |                   |                |                   |                |                   | K    | 147.112804         | 74.060040       | 130.086255     | 65.546765        |                   |                  | 1  |

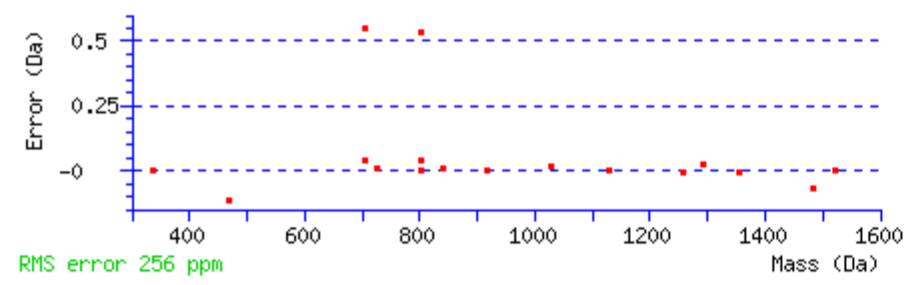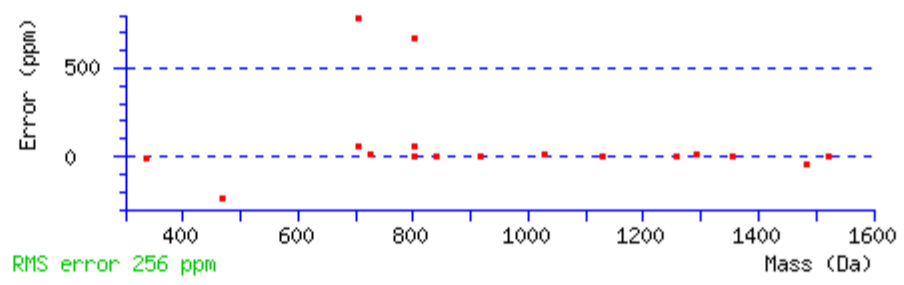

NCBI BLAST search of **EAHQLFLEPEVLDPEVELK**  
 (Parameters: blastp, nr protein database, expect=20000, no filter, PAM30)  
 Other BLAST [web gateways](#)

**All matches to this query**

| Score | Mr(calc):   | Delta     | Sequence                               |
|-------|-------------|-----------|----------------------------------------|
| 31.7  | 2321.179062 | -0.003420 | <a href="#">EAHQLFLEPEVLDPEVELK</a>    |
| 2.2   | 2321.157288 | 0.018354  | <a href="#">ALGDVPEPGAAREALMPPLEQL</a> |
| 0.1   | 2321.157288 | 0.018354  | <a href="#">ALGDVPEPGAAREALMPPLEQL</a> |

# Mascot Search Results

## Peptide View

MS/MS Fragmentation of **LLQLQEMGNR**

Found in **FHAD1\_HUMAN**, Forkhead-associated domain-containing protein 1 OS=Homo sapiens GN=FHAD1 PE=2 SV=2

Match to Query 522879: 1200.619388 from(601.316970,2+) rtinseconds(1906) index(593041)

Title: Locus:1.1.1.1049.23

Data file C:\Program Files (x86)\Matrix Science\Mascot Daemon\mgf\3 TFD - Epitel - R2\mascot\_daemon\_merge.mgf

Click mouse within plot area to zoom in by factor of two about that point

Or, Plot from  to  Da

Label all possible matches  Label matches used for scoring

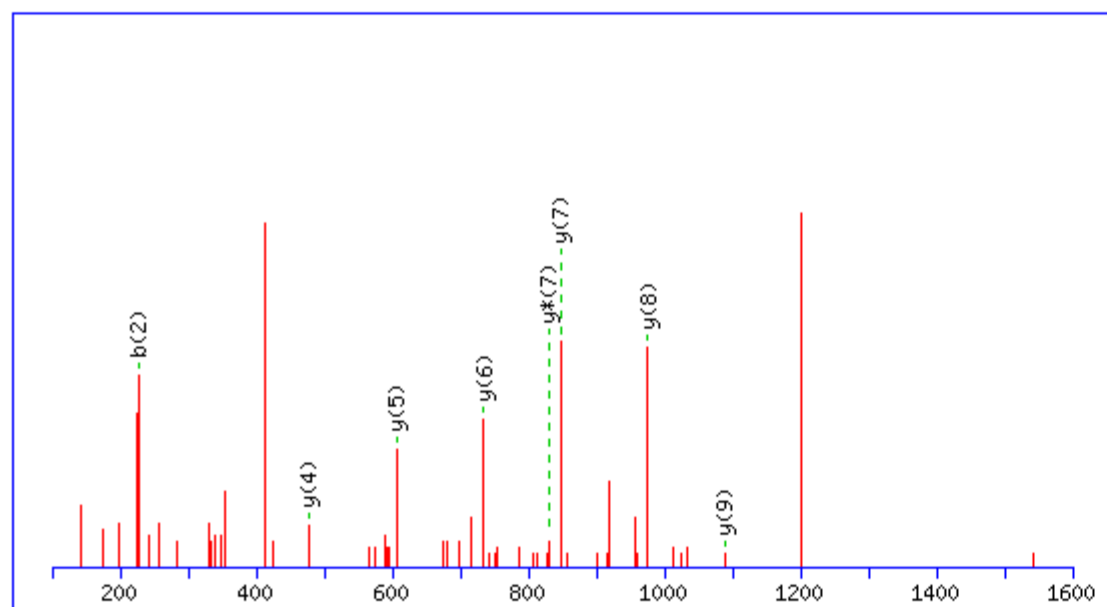

Monoisotopic mass of neutral peptide Mr(calc): 1200.628464

Fixed modifications: Carbamidomethyl (C) (apply to specified residues or termini only)

Ions Score: 46 Expect: 0.00034

Matches : 8/86 fragment ions using 10 most intense peaks [\(help\)](#)

| #  | b                 | b <sup>++</sup> | b <sup>*</sup> | b <sup>*++</sup> | b <sup>0</sup> | b <sup>0++</sup> | Seq. | y                  | y <sup>++</sup> | y <sup>*</sup>    | y <sup>*++</sup> | y <sup>0</sup> | y <sup>0++</sup> | #  |
|----|-------------------|-----------------|----------------|------------------|----------------|------------------|------|--------------------|-----------------|-------------------|------------------|----------------|------------------|----|
| 1  | 114.091340        | 57.549308       |                |                  |                |                  | L    |                    |                 |                   |                  |                |                  | 10 |
| 2  | <b>227.175404</b> | 114.091340      |                |                  |                |                  | L    | <b>1088.551705</b> | 544.779491      | 1071.525156       | 536.266216       | 1070.541140    | 535.774208       | 9  |
| 3  | 355.233982        | 178.120629      | 338.207433     | 169.607355       |                |                  | Q    | <b>975.467641</b>  | 488.237459      | 958.441092        | 479.724184       | 957.457076     | 479.232176       | 8  |
| 4  | 468.318046        | 234.662661      | 451.291497     | 226.149387       |                |                  | L    | <b>847.409063</b>  | 424.208170      | <b>830.382514</b> | 415.694895       | 829.398498     | 415.202887       | 7  |
| 5  | 596.376624        | 298.691950      | 579.350075     | 290.178676       |                |                  | Q    | <b>734.324999</b>  | 367.666138      | 717.298450        | 359.152863       | 716.314434     | 358.660855       | 6  |
| 6  | 725.419217        | 363.213247      | 708.392668     | 354.699972       | 707.408652     | 354.207964       | E    | <b>606.266421</b>  | 303.636849      | 589.239872        | 295.123574       | 588.255856     | 294.631566       | 5  |
| 7  | 856.459702        | 428.733489      | 839.433153     | 420.220215       | 838.449137     | 419.728207       | M    | <b>477.223828</b>  | 239.115552      | 460.197279        | 230.602278       |                |                  | 4  |
| 8  | 913.481166        | 457.244221      | 896.454617     | 448.730947       | 895.470601     | 448.238939       | G    | 346.183343         | 173.595310      | 329.156794        | 165.082035       |                |                  | 3  |
| 9  | 1027.524093       | 514.265685      | 1010.497544    | 505.752410       | 1009.513528    | 505.260402       | N    | 289.161879         | 145.084577      | 272.135330        | 136.571303       |                |                  | 2  |
| 10 |                   |                 |                |                  |                |                  | R    | 175.118952         | 88.063114       | 158.092403        | 79.549839        |                |                  | 1  |

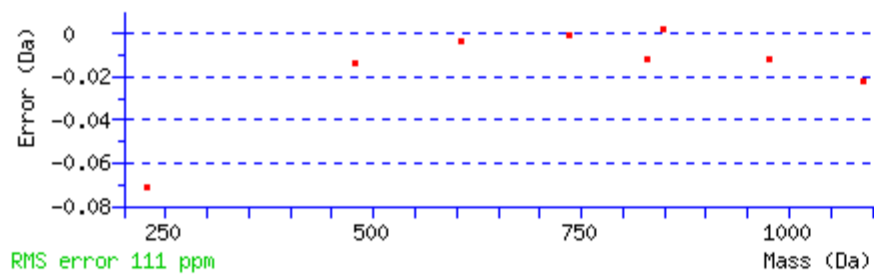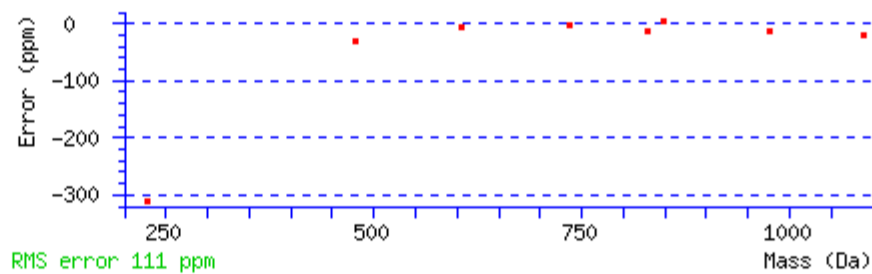

NCBI BLAST search of [LLQLQEMGNR](#)

(Parameters: blastp, nr protein database, expect=20000, no filter, PAM30)

Other BLAST [web gateways](#)

All matches to this query

| Score | Mr(calc):   | Delta     | Sequence                    |
|-------|-------------|-----------|-----------------------------|
| 46.3  | 1200.628464 | -0.009076 | <a href="#">LLQLQEMGNR</a>  |
| 8.8   | 1200.609818 | 0.009570  | <a href="#">LLQEEEERR</a>   |
| 3.9   | 1200.609848 | 0.009540  | <a href="#">LPANTADISQR</a> |
| 0.7   | 1200.625092 | -0.005704 | <a href="#">KDQLEYHIR</a>   |

Mascot: <http://www.matrixscience.com/>

# MASCOT SCIENCE Mascot Search Results

## Peptide View

### MS/MS Fragmentation of **CSLSLVGR**

Found in **FHL2\_HUMAN**, Four and a half LIM domains protein 2 OS=Homo sapiens GN=FHL2 PE=1 SV=3

Match to Query 116286: 890.471188 from(446.242870,2+) rtinseconds(1906) index(674367)

Title: Locus:1.1.1.1395.9

Data file C:\Program Files (x86)\Matrix Science\Mascot Daemon\mgf3 TFD - Epitel - R2\mascot\_daemon\_merge.mgf

Click mouse within plot area to zoom in by factor of two about that point

Or, Plot from  to  Da

Label all possible matches  Label matches used for scoring

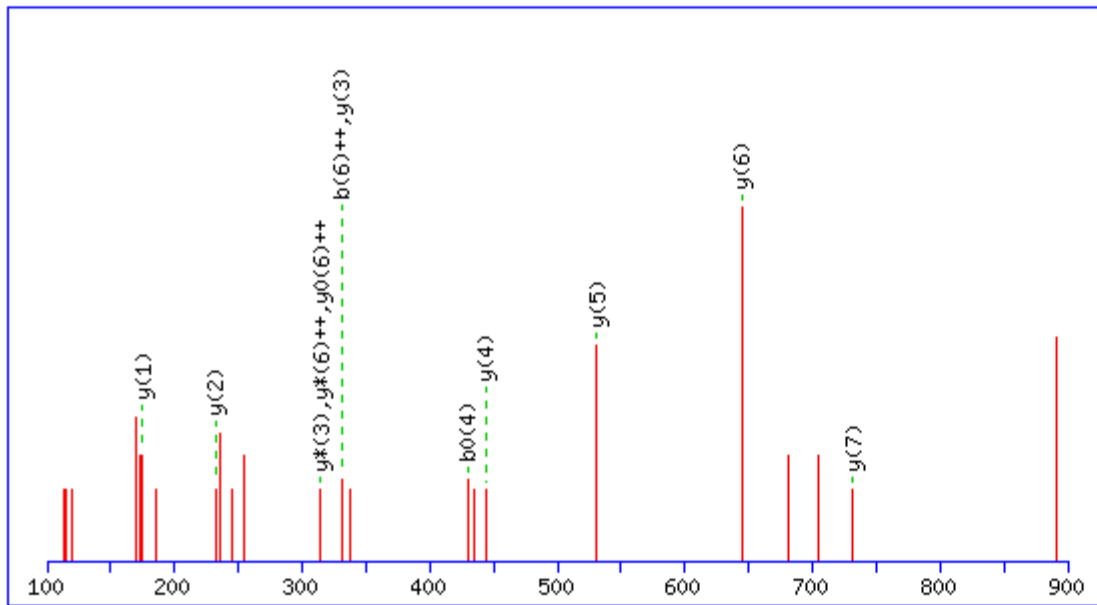

Monoisotopic mass of neutral peptide Mr(calc): 890.464386

Fixed modifications: Carbamidomethyl (C) (apply to specified residues or termini only)

Ions Score: 49 Expect: 0.00013

Matches : 12/60 fragment ions using 17 most intense peaks ([help](#))

| # | b          | b <sup>++</sup>   | b <sup>0</sup>    | b <sup>0++</sup> | Seq. | y                 | y <sup>++</sup> | y <sup>*</sup>    | y <sup>*++</sup>  | y <sup>0</sup> | y <sup>0++</sup>  | # |
|---|------------|-------------------|-------------------|------------------|------|-------------------|-----------------|-------------------|-------------------|----------------|-------------------|---|
| 1 | 161.037925 | 81.022600         |                   |                  | C    |                   |                 |                   |                   |                |                   | 8 |
| 2 | 248.069953 | 124.538614        | 230.059388        | 115.533332       | S    | <b>731.441014</b> | 366.224145      | 714.414465        | 357.710871        | 713.430449     | 357.218863        | 7 |
| 3 | 361.154017 | 181.080647        | 343.143452        | 172.075364       | L    | <b>644.408986</b> | 322.708131      | 627.382437        | <b>314.194857</b> | 626.398421     | <b>313.702849</b> | 6 |
| 4 | 448.186045 | 224.596660        | <b>430.175480</b> | 215.591378       | S    | <b>531.324922</b> | 266.166099      | 514.298373        | 257.652825        | 513.314357     | 257.160817        | 5 |
| 5 | 561.270109 | 281.138693        | 543.259544        | 272.133410       | L    | <b>444.292894</b> | 222.650085      | 427.266345        | 214.136810        |                |                   | 4 |
| 6 | 660.338523 | <b>330.672900</b> | 642.327958        | 321.667617       | V    | <b>331.208830</b> | 166.108053      | <b>314.182281</b> | 157.594778        |                |                   | 3 |
| 7 | 717.359987 | 359.183632        | 699.349422        | 350.178349       | G    | <b>232.140416</b> | 116.573846      | 215.113867        | 108.060571        |                |                   | 2 |
| 8 |            |                   |                   |                  | R    | <b>175.118952</b> | 88.063114       | 158.092403        | 79.549839         |                |                   | 1 |

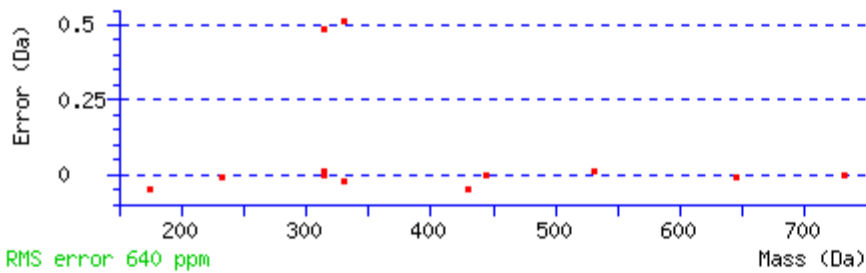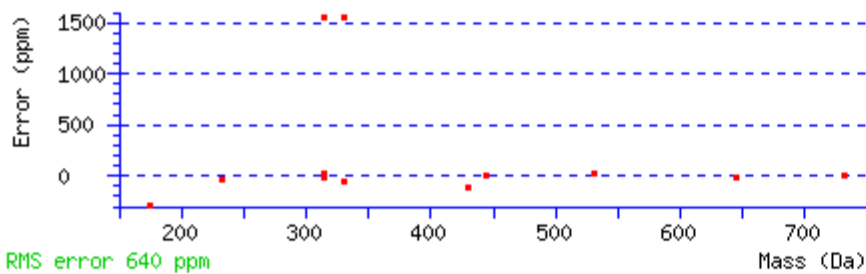

### NCBI BLAST search of **CSLSLVGR**

(Parameters: blastp, nr protein database, expect=20000, no filter, PAM30)

Other BLAST [web gateways](#)

### All matches to this query

| Score | Mr(calc):  | Delta     | Sequence                 |
|-------|------------|-----------|--------------------------|
| 48.9  | 890.464386 | 0.006802  | <a href="#">CSLSLVGR</a> |
| 5.7   | 890.475601 | -0.004413 | <a href="#">SCLRSLR</a>  |

# **MASCOT** Mascot Search Results

## Peptide View

MS/MS Fragmentation of **LQIDEQLR**

Found in **FMRI\_HUMAN**, Fragile X mental retardation 1 protein OS=Homo sapiens GN=FMR1 PE=1 SV=1

Match to Query 17417: 1013.551248 from(507.782900,2+) rtinseconds(2021) index(22276)

Title: Locus:1.1.1.2163.24

Data file 2011-11-12 - TFD - EP 6-2.mgf

Click mouse within plot area to zoom in by factor of two about that point

Or, Plot from  to  Da

Label all possible matches  Label matches used for scoring

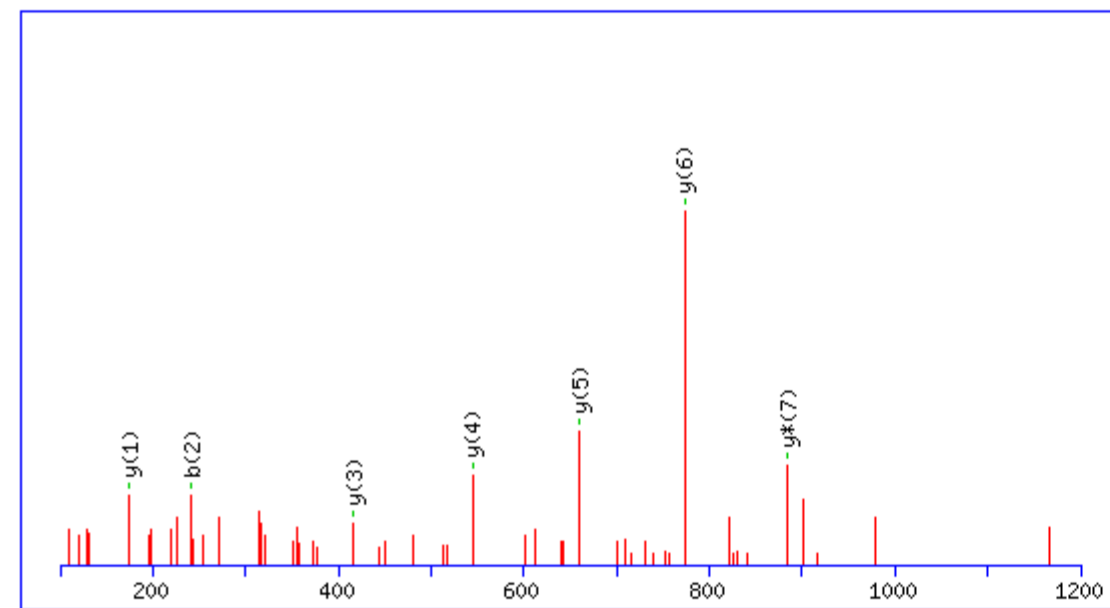

Monoisotopic mass of neutral peptide  $M_r(\text{calc})$ : 1013.550537

Fixed modifications: Propionamide (C) (apply to specified residues or termini only)

Ions Score: 37 Expect: 0.0027

Matches : 7/70 fragment ions using 9 most intense peaks [\(help\)](#)

| # | b                 | b <sup>++</sup> | b <sup>*</sup> | b <sup>*++</sup> | b <sup>0</sup> | b <sup>0++</sup> | Seq. | y                 | y <sup>++</sup> | y <sup>*</sup>    | y <sup>*++</sup> | y <sup>0</sup> | y <sup>0++</sup> | # |
|---|-------------------|-----------------|----------------|------------------|----------------|------------------|------|-------------------|-----------------|-------------------|------------------|----------------|------------------|---|
| 1 | 114.091340        | 57.549308       |                |                  |                |                  | L    |                   |                 |                   |                  |                |                  | 8 |
| 2 | <b>242.149918</b> | 121.578597      | 225.123369     | 113.065323       |                |                  | Q    | 901.473772        | 451.240524      | <b>884.447223</b> | 442.727250       | 883.463207     | 442.235242       | 7 |
| 3 | 355.233982        | 178.120629      | 338.207433     | 169.607355       |                |                  | I    | <b>773.415194</b> | 387.211235      | 756.388645        | 378.697961       | 755.404629     | 378.205953       | 6 |
| 4 | 470.260925        | 235.634101      | 453.234376     | 227.120826       | 452.250360     | 226.628818       | D    | <b>660.331130</b> | 330.669203      | 643.304581        | 322.155929       | 642.320565     | 321.663921       | 5 |
| 5 | 599.303518        | 300.155397      | 582.276969     | 291.642123       | 581.292953     | 291.150115       | E    | <b>545.304187</b> | 273.155732      | 528.277638        | 264.642457       | 527.293622     | 264.150449       | 4 |
| 6 | 727.362096        | 364.184686      | 710.335547     | 355.671412       | 709.351531     | 355.179404       | Q    | <b>416.261594</b> | 208.634435      | 399.235045        | 200.121160       |                |                  | 3 |
| 7 | 840.446160        | 420.726718      | 823.419611     | 412.213444       | 822.435595     | 411.721436       | L    | 288.203016        | 144.605146      | 271.176467        | 136.091871       |                |                  | 2 |
| 8 |                   |                 |                |                  |                |                  | R    | <b>175.118952</b> | 88.063114       | 158.092403        | 79.549839        |                |                  | 1 |

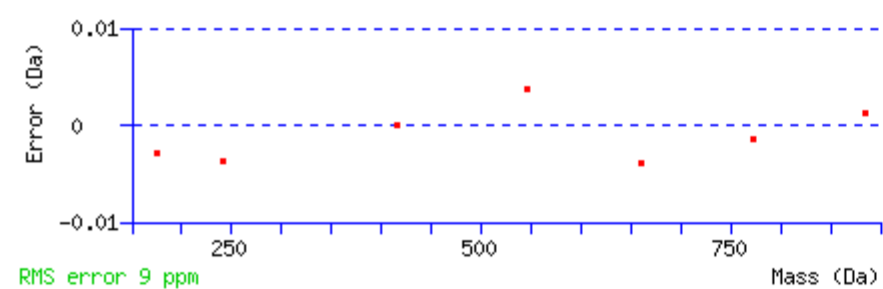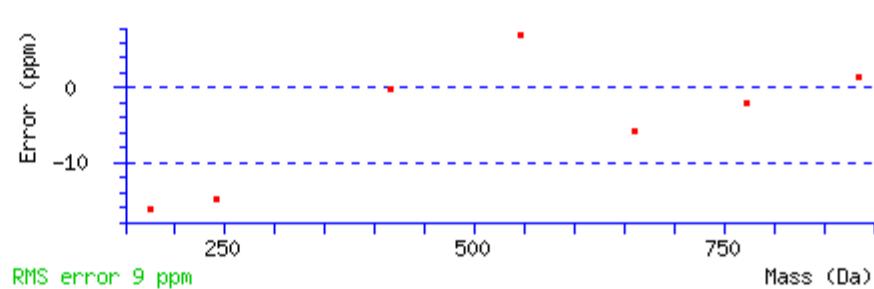

NCBI BLAST search of **LQIDEQLR**

(Parameters: blastp, nr protein database, expect=20000, no filter, PAM30)

Other BLAST [web gateways](#)

## All matches to this query

| Score | $M_r(\text{calc})$ : | Delta    | Sequence                   |
|-------|----------------------|----------|----------------------------|
| 37.0  | 1013.550537          | 0.000711 | <a href="#">LQIDEQLR</a>   |
| 8.2   | 1013.550537          | 0.000711 | <a href="#">KAAVEDPR</a>   |
| 4.2   | 1013.550568          | 0.000680 | <a href="#">LLQGDTPVR</a>  |
| 3.6   | 1013.550537          | 0.000711 | <a href="#">QLVQEELR</a>   |
| 2.9   | 1013.550537          | 0.000711 | <a href="#">KEVLASPDR</a>  |
| 2.7   | 1013.550537          | 0.000711 | <a href="#">LEEVQLR</a>    |
| 2.6   | 1013.550552          | 0.000696 | <a href="#">QPASLLDVR</a>  |
| 0.0   | 1013.550552          | 0.000696 | <a href="#">SPGTSPLLSR</a> |

Mascot: <http://www.matrixscience.com/>

# MATRIX SCIENCE Mascot Search Results

## Peptide View

MS/MS Fragmentation of **SGHHPGETPPLITPGSAQS**

Found in **FXVD3\_HUMAN**, FXVD domain-containing ion transport regulator 3 OS=Homo sapiens GN=FXVD3 PE=2 SV=1

Match to Query 46804: 1868.898222 from(623.973350,3+) rtinseconds(1744) index(12573)

Title: Locus:1.1.1.1994.32

Data file 2011-11-12 - TFD - EP 6-7.mgf

Click mouse within plot area to zoom in by factor of two about that point

Or, Plot from  to  Da

Label all possible matches  Label matches used for scoring

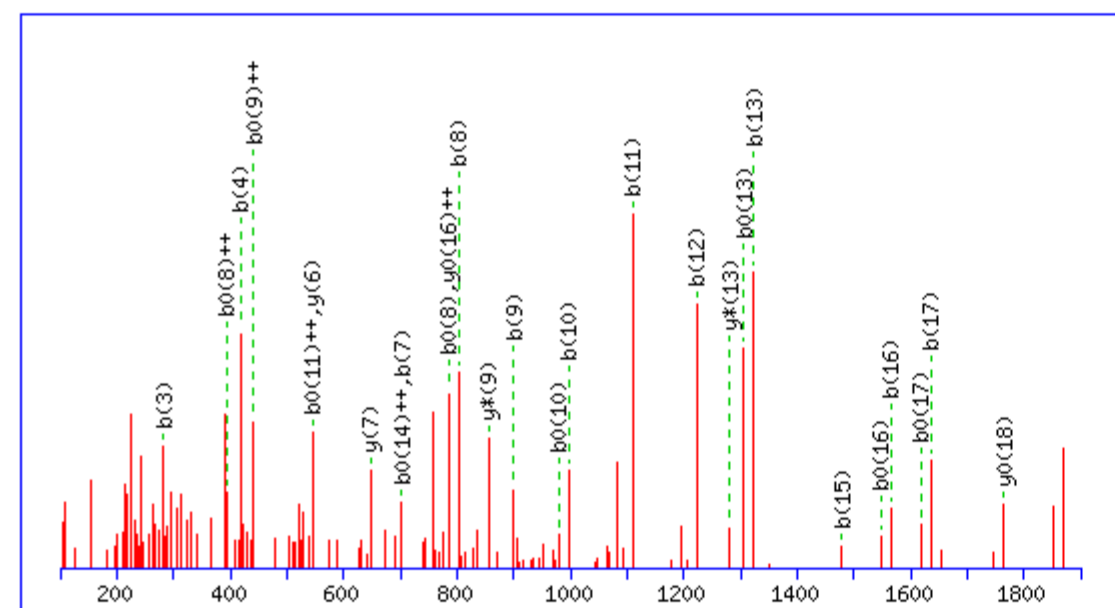

Monoisotopic mass of neutral peptide Mr(calc): 1868.901703

Fixed modifications: Propionamide (C) (apply to specified residues or termini only)

Ions Score: 108 Expect: 2.2e-010

Matches: 28/180 fragment ions using 34 most intense peaks [\(help\)](#)

| #  | b                  | b <sup>++</sup> | b <sup>*</sup> | b <sup>++</sup> | b <sup>0</sup>     | b <sup>0++</sup>  | Seq. | y                 | y <sup>++</sup> | y <sup>*</sup>     | y <sup>++</sup> | y <sup>0</sup> | y <sup>0++</sup>  | #  |
|----|--------------------|-----------------|----------------|-----------------|--------------------|-------------------|------|-------------------|-----------------|--------------------|-----------------|----------------|-------------------|----|
| 1  | 88.039304          | 44.523290       |                |                 | 70.028739          | 35.518008         | S    |                   |                 |                    |                 |                |                   | 19 |
| 2  | 145.060768         | 73.034022       |                |                 | 127.050203         | 64.028740         | G    | 1782.876940       | 891.942108      | 1765.850391        | 883.428834      | 1764.866375    | 882.936825        | 18 |
| 3  | <b>282.119680</b>  | 141.563478      |                |                 | 264.109115         | 132.558195        | H    | 1725.855476       | 863.431376      | 1708.828927        | 854.918102      | 1707.844911    | 854.426093        | 17 |
| 4  | <b>419.178592</b>  | 210.092934      |                |                 | 401.168027         | 201.087651        | H    | 1588.796564       | 794.901920      | 1571.770015        | 786.388646      | 1570.785999    | <b>785.896638</b> | 16 |
| 5  | 516.231356         | 258.619316      |                |                 | 498.220791         | 249.614034        | P    | 1451.737652       | 726.372464      | 1434.711103        | 717.859190      | 1433.727087    | 717.367182        | 15 |
| 6  | 573.252820         | 287.130048      |                |                 | 555.242255         | 278.124766        | G    | 1354.684888       | 677.846082      | 1337.658339        | 669.332808      | 1336.674323    | 668.840800        | 14 |
| 7  | <b>702.295413</b>  | 351.651345      |                |                 | 684.284848         | 342.646062        | E    | 1297.663424       | 649.335350      | <b>1280.636875</b> | 640.822076      | 1279.652859    | 640.330068        | 13 |
| 8  | <b>803.343092</b>  | 402.175184      |                |                 | <b>785.332527</b>  | <b>393.169902</b> | T    | 1168.620831       | 584.814054      | 1151.594282        | 576.300779      | 1150.610266    | 575.808771        | 12 |
| 9  | <b>900.395856</b>  | 450.701566      |                |                 | 882.385291         | <b>441.696284</b> | P    | 1067.573152       | 534.290214      | 1050.546603        | 525.776940      | 1049.562587    | 525.284931        | 11 |
| 10 | <b>997.448620</b>  | 499.227948      |                |                 | <b>979.438055</b>  | 490.222666        | P    | 970.520388        | 485.763832      | 953.493839         | 477.250557      | 952.509823     | 476.758549        | 10 |
| 11 | <b>1110.532684</b> | 555.769980      |                |                 | 1092.522119        | <b>546.764698</b> | L    | 873.467624        | 437.237450      | <b>856.441075</b>  | 428.724175      | 855.457059     | 428.232167        | 9  |
| 12 | <b>1223.616748</b> | 612.312012      |                |                 | 1205.606183        | 603.306729        | I    | 760.383560        | 380.695418      | 743.357011         | 372.182144      | 742.372995     | 371.690136        | 8  |
| 13 | <b>1324.664427</b> | 662.835851      |                |                 | <b>1306.653862</b> | 653.830569        | T    | <b>647.299496</b> | 324.153386      | 630.272947         | 315.640112      | 629.288931     | 315.148104        | 7  |
| 14 | 1421.717191        | 711.362234      |                |                 | 1403.706626        | <b>702.356951</b> | P    | <b>546.251817</b> | 273.629547      | 529.225268         | 265.116272      | 528.241252     | 264.624264        | 6  |
| 15 | <b>1478.738655</b> | 739.872965      |                |                 | 1460.728090        | 730.867683        | G    | 449.199053        | 225.103164      | 432.172504         | 216.589890      | 431.188488     | 216.097882        | 5  |
| 16 | <b>1565.770683</b> | 783.388980      |                |                 | <b>1547.760118</b> | 774.383697        | S    | 392.177589        | 196.592433      | 375.151040         | 188.079158      | 374.167024     | 187.587150        | 4  |
| 17 | <b>1636.807797</b> | 818.907536      |                |                 | <b>1618.797232</b> | 809.902254        | A    | 305.145561        | 153.076418      | 288.119012         | 144.563144      | 287.134996     | 144.071136        | 3  |
| 18 | <b>1764.866375</b> | 882.936825      | 1747.839826    | 874.423551      | 1746.855810        | 873.931543        | Q    | 234.108447        | 117.557861      | 217.081898         | 109.044587      | 216.097882     | 108.552579        | 2  |
| 19 |                    |                 |                |                 |                    |                   | S    | 106.049869        | 53.528573       |                    |                 | 88.039304      | 44.523290         | 1  |

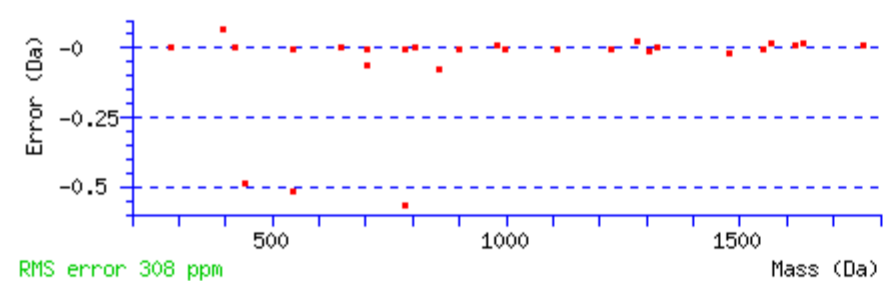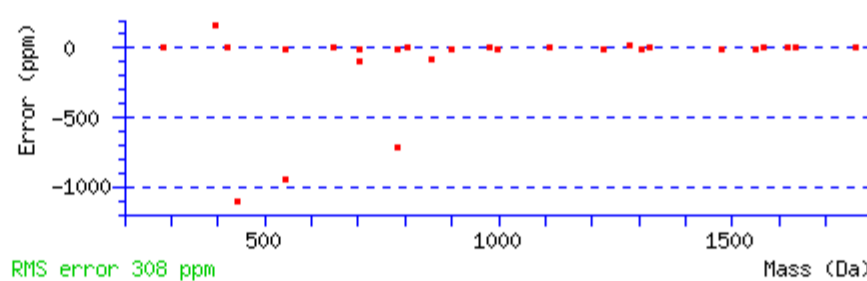

NCBI BLAST search of **SGHHPGETPPLITPGSAQS**

(Parameters: blastp, nr protein database, expect=20000, no filter, PAM30)

Other BLAST [web gateways](#)

## All matches to this query

| Score | Mr(calc):   | Delta     | Sequence                            |
|-------|-------------|-----------|-------------------------------------|
| 107.6 | 1868.901703 | -0.003481 | <a href="#">SGHHPGETPPLITPGSAQS</a> |

Mascot: <http://www.matrixscience.com/>

# MASCOT SCIENCE Mascot Search Results

## Peptide View

MS/MS Fragmentation of **LDEVQCTGTEASLADCK**

Found in **LG3BP\_HUMAN**, Galectin-3-binding protein OS=Homo sapiens GN=LGALS3BP PE=1 SV=1

Match to Query 1005914: 1895.833548 from(948.924050,2+) rtinseconds(1964) index(261867)

Title: Locus:1.1.1.1196.50

Data file C:\Program Files (x86)\Matrix Science\Mascot Daemon\mgf3 TFD - Epitel - R2\mascot\_daemon\_merge.mgf

Click mouse within plot area to zoom in by factor of two about that point

Or, Plot from  to  Da

Label all possible matches  Label matches used for scoring

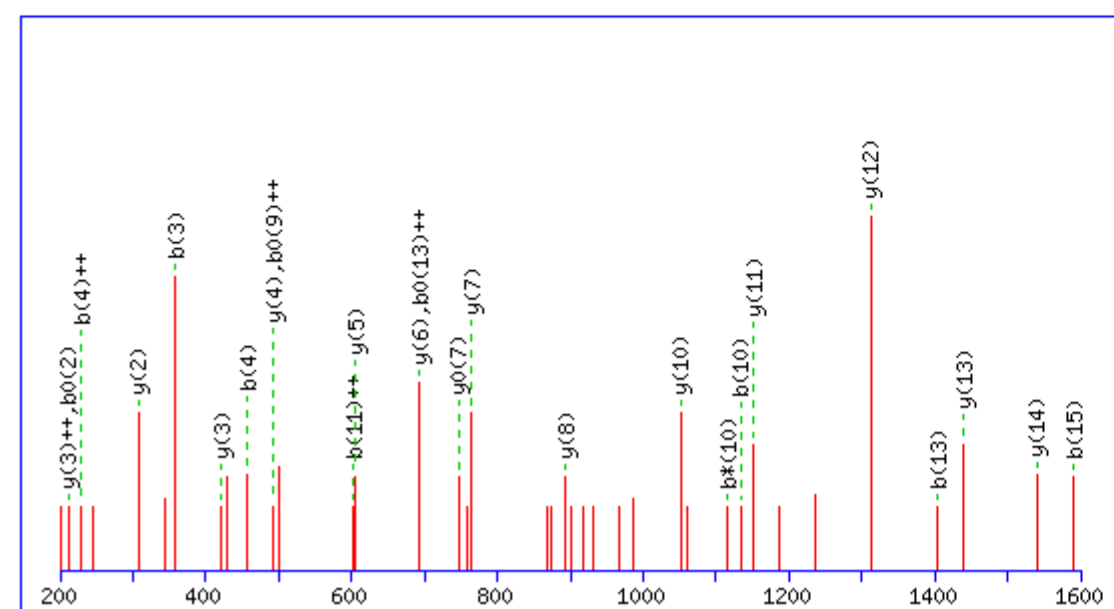

Monoisotopic mass of neutral peptide Mr(calcd): 1895.824097

Fixed modifications: Carbamidomethyl (C) (apply to specified residues or termini only)

Ions Score: 84 Expect: 2.9e-008

Matches : 26/178 fragment ions using 38 most intense peaks [\(help\)](#)

| #  | b                  | b <sup>++</sup>   | b <sup>+</sup>     | b <sup>*++</sup> | b <sup>0</sup>    | b <sup>0++</sup>  | Seq. | y                  | y <sup>++</sup>   | y <sup>+</sup> | y <sup>*++</sup> | y <sup>0</sup>    | y <sup>0++</sup> | #  |
|----|--------------------|-------------------|--------------------|------------------|-------------------|-------------------|------|--------------------|-------------------|----------------|------------------|-------------------|------------------|----|
| 1  | 114.091340         | 57.549308         |                    |                  |                   |                   | L    |                    |                   |                |                  |                   |                  | 17 |
| 2  | <b>229.118283</b>  | 115.062779        |                    |                  | <b>211.107718</b> | 106.057497        | D    | 1783.747308        | 892.377292        | 1766.720759    | 883.864018       | 1765.736743       | 883.372010       | 16 |
| 3  | <b>358.160876</b>  | 179.584076        |                    |                  | 340.150311        | 170.578793        | E    | 1668.720365        | 834.863821        | 1651.693816    | 826.350546       | 1650.709800       | 825.858538       | 15 |
| 4  | <b>457.229290</b>  | <b>229.118283</b> |                    |                  | 439.218725        | 220.113001        | V    | <b>1539.677772</b> | 770.342524        | 1522.651223    | 761.829250       | 1521.667207       | 761.337242       | 14 |
| 5  | 585.287868         | 293.147572        | 568.261319         | 284.634298       | 567.277303        | 284.142290        | Q    | <b>1440.609358</b> | 720.808317        | 1423.582809    | 712.295043       | 1422.598793       | 711.803035       | 13 |
| 6  | 745.318517         | 373.162897        | 728.291968         | 364.649622       | 727.307952        | 364.157614        | C    | <b>1312.550780</b> | 656.779028        | 1295.524231    | 648.265754       | 1294.540215       | 647.773746       | 12 |
| 7  | 846.366196         | 423.686736        | 829.339647         | 415.173462       | 828.355631        | 414.681454        | T    | <b>1152.520131</b> | 576.763704        | 1135.493582    | 568.250429       | 1134.509566       | 567.758421       | 11 |
| 8  | 903.387660         | 452.197468        | 886.361111         | 443.684194       | 885.377095        | 443.192186        | G    | <b>1051.472452</b> | 526.239864        | 1034.445903    | 517.726590       | 1033.461887       | 517.234582       | 10 |
| 9  | 1004.435339        | 502.721308        | 987.408790         | 494.208033       | 986.424774        | <b>493.716025</b> | T    | 994.450988         | 497.729132        | 977.424439     | 489.215858       | 976.440423        | 488.723850       | 9  |
| 10 | <b>1133.477932</b> | 567.242604        | <b>1116.451383</b> | 558.729330       | 1115.467367       | 558.237322        | E    | <b>893.403309</b>  | 447.205293        | 876.376760     | 438.692018       | 875.392744        | 438.200010       | 8  |
| 11 | 1204.515046        | <b>602.761161</b> | 1187.488497        | 594.247887       | 1186.504481       | 593.755879        | A    | <b>764.360716</b>  | 382.683996        | 747.334167     | 374.170722       | <b>746.350151</b> | 373.678714       | 7  |
| 12 | 1291.547074        | 646.277175        | 1274.520525        | 637.763901       | 1273.536509       | 637.271893        | S    | <b>693.323602</b>  | 347.165439        | 676.297053     | 338.652165       | 675.313037        | 338.160157       | 6  |
| 13 | <b>1404.631138</b> | 702.819207        | 1387.604589        | 694.305933       | 1386.620573       | <b>693.813925</b> | L    | <b>606.291574</b>  | 303.649425        | 589.265025     | 295.136151       | 588.281009        | 294.644143       | 5  |
| 14 | 1475.668252        | 738.337764        | 1458.641703        | 729.824490       | 1457.657687       | 729.332482        | A    | <b>493.207510</b>  | 247.107393        | 476.180961     | 238.594119       | 475.196945        | 238.102111       | 4  |
| 15 | <b>1590.695195</b> | 795.851236        | 1573.668646        | 787.337961       | 1572.684630       | 786.845953        | D    | <b>422.170396</b>  | <b>211.588836</b> | 405.143847     | 203.075562       | 404.159831        | 202.583554       | 3  |
| 16 | 1750.725844        | 875.866560        | 1733.699295        | 867.353286       | 1732.715279       | 866.861278        | C    | <b>307.143453</b>  | 154.075365        | 290.116904     | 145.562090       |                   |                  | 2  |
| 17 |                    |                   |                    |                  |                   |                   | K    | 147.112804         | 74.060040         | 130.086255     | 65.546765        |                   |                  | 1  |

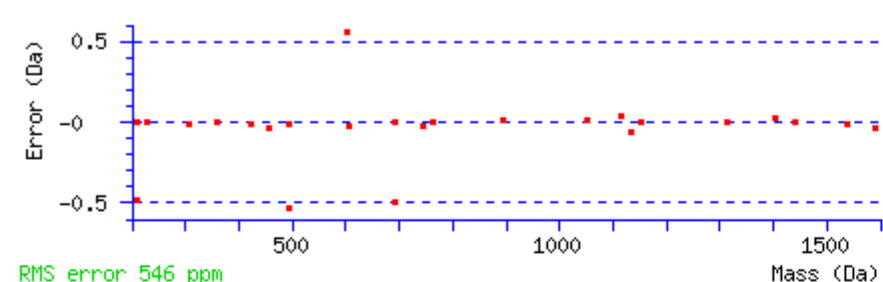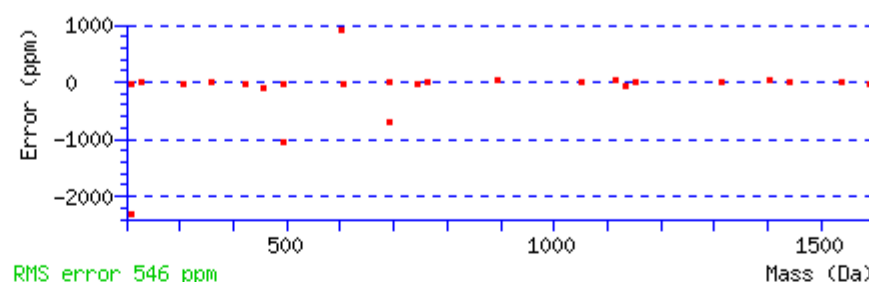

NCBI BLAST search of [LDEVQCTGTEASLADCK](#)

(Parameters: blastp, nr protein database, expect=20000, no filter, PAM30)

Other BLAST [web gateways](#)

## All matches to this query

| Score | Mr(calcd):  | Delta    | Sequence                          |
|-------|-------------|----------|-----------------------------------|
| 83.5  | 1895.824097 | 0.009451 | <a href="#">LDEVQCTGTEASLADCK</a> |

Mascot: <http://www.matrixscience.com/>

# MASCOT Search Results

## Peptide View

MS/MS Fragmentation of **ASPQCVGYSR**

Found in **OFUT1\_HUMAN**, GDP-fucose protein O-fucosyltransferase 1 OS=Homo sapiens GN=POFUT1 PE=1 SV=1

Match to Query 423680: 1123.509308 from(562.761930,2+) rtinseconds(1095) index(330430)

Title: Locus:1.1.1.750.31

Data file C:\Program Files (x86)\Matrix Science\Mascot Daemon\mgf\3 TFD - Epitel - R2\mascot\_daemon\_merge.mgf

Click mouse within plot area to zoom in by factor of two about that point

Or, Plot from  to  Da

Label all possible matches  Label matches used for scoring

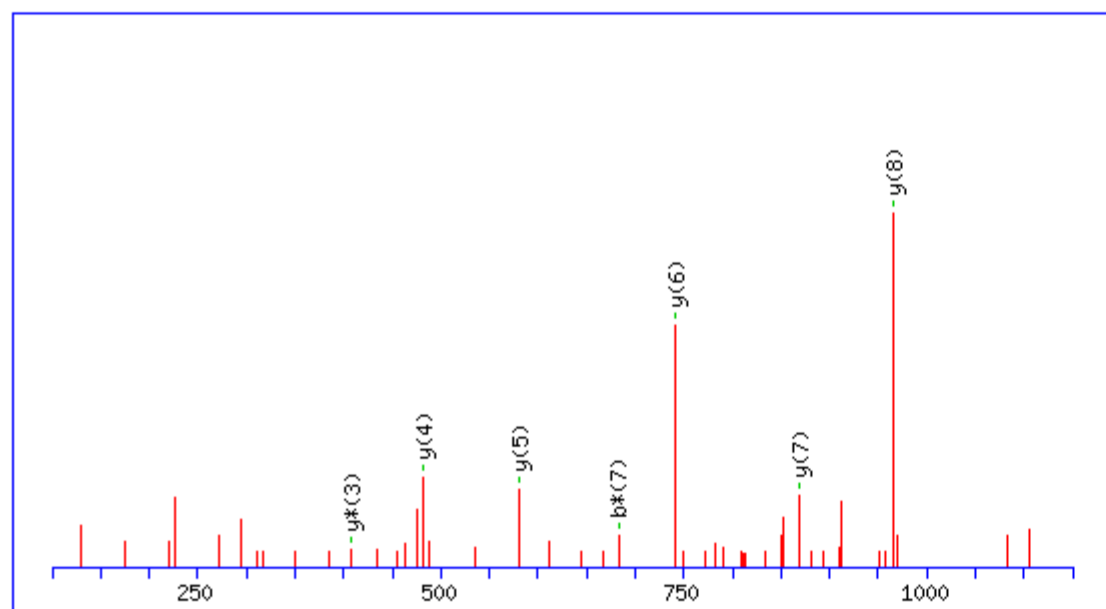

Monoisotopic mass of neutral peptide  $M_r(\text{calc})$ : 1123.508041

Fixed modifications: Carbamidomethyl (C) (apply to specified residues or termini only)

Ions Score: 37 Expect: 0.001

Matches : 7/98 fragment ions using 10 most intense peaks ([help](#))

| #  | b          | b <sup>++</sup> | b*                | b <sup>*++</sup> | b <sup>0</sup> | b <sup>0++</sup> | Seq. | y                 | y <sup>++</sup> | y*                | y <sup>*++</sup> | y <sup>0</sup> | y <sup>0++</sup> | #  |
|----|------------|-----------------|-------------------|------------------|----------------|------------------|------|-------------------|-----------------|-------------------|------------------|----------------|------------------|----|
| 1  | 72.044390  | 36.525833       |                   |                  |                |                  | A    |                   |                 |                   |                  |                |                  | 10 |
| 2  | 159.076418 | 80.041847       |                   |                  | 141.065853     | 71.036564        | S    | 1053.478206       | 527.242741      | 1036.451657       | 518.729467       | 1035.467641    | 518.237459       | 9  |
| 3  | 256.129182 | 128.568229      |                   |                  | 238.118617     | 119.562947       | P    | <b>966.446178</b> | 483.726727      | 949.419629        | 475.213453       | 948.435613     | 474.721445       | 8  |
| 4  | 384.187760 | 192.597518      | 367.161211        | 184.084243       | 366.177195     | 183.592235       | Q    | <b>869.393414</b> | 435.200345      | 852.366865        | 426.687071       | 851.382849     | 426.195063       | 7  |
| 5  | 544.218409 | 272.612843      | 527.191860        | 264.099568       | 526.207844     | 263.607560       | C    | <b>741.334836</b> | 371.171056      | 724.308287        | 362.657782       | 723.324271     | 362.165774       | 6  |
| 6  | 643.286823 | 322.147050      | 626.260274        | 313.633775       | 625.276258     | 313.141767       | V    | <b>581.304187</b> | 291.155732      | 564.277638        | 282.642457       | 563.293622     | 282.150449       | 5  |
| 7  | 700.308287 | 350.657782      | <b>683.281738</b> | 342.144507       | 682.297722     | 341.652499       | G    | <b>482.235773</b> | 241.621525      | 465.209224        | 233.108250       | 464.225208     | 232.616242       | 4  |
| 8  | 863.371616 | 432.189446      | 846.345067        | 423.676172       | 845.361051     | 423.184164       | Y    | 425.214309        | 213.110793      | <b>408.187760</b> | 204.597518       | 407.203744     | 204.105510       | 3  |
| 9  | 950.403644 | 475.705460      | 933.377095        | 467.192186       | 932.393079     | 466.700178       | S    | 262.150980        | 131.579128      | 245.124431        | 123.065854       | 244.140415     | 122.573846       | 2  |
| 10 |            |                 |                   |                  |                |                  | R    | 175.118952        | 88.063114       | 158.092403        | 79.549840        |                |                  | 1  |

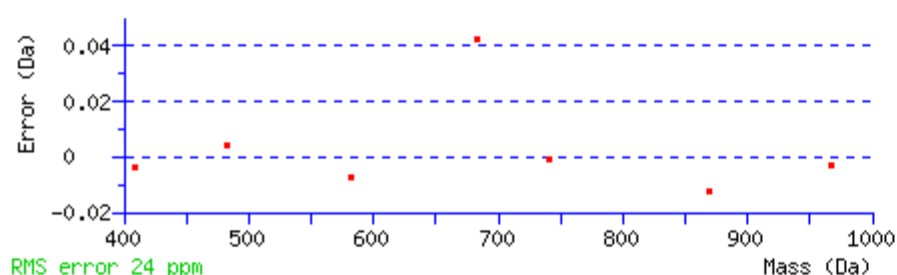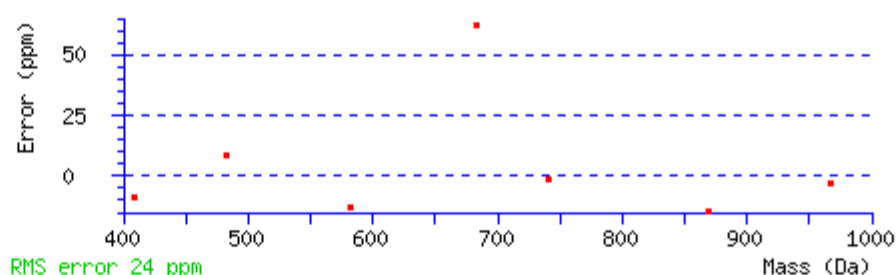

NCBI BLAST search of **ASPQCVGYSR**

(Parameters: blastp, nr protein database, expect=20000, no filter, PAM30)

Other BLAST [web gateways](#)

All matches to this query

| Score | $M_r(\text{calc})$ : | Delta    | Sequence                   |
|-------|----------------------|----------|----------------------------|
| 36.6  | 1123.508041          | 0.001267 | <a href="#">ASPQCVGYSR</a> |

Mascot: <http://www.matrixscience.com/>



# MASCOT Search Results

## Peptide View

MS/MS Fragmentation of **LSTASCPTPK**

Found in **GEPH\_HUMAN**, Gephyrin OS=Homo sapiens GN=GPHN PE=1 SV=1

Match to Query 21980: 1074.532328 from(538.273440,2+) rtinseconds(1058) index(4090)

Title: Locus:1.1.1.1799.38

Data file 2011-11-12 - TFD - EP 6-2.mgf

Click mouse within plot area to zoom in by factor of two about that point

Or,   to  Da

Label all possible matches  Label matches used for scoring

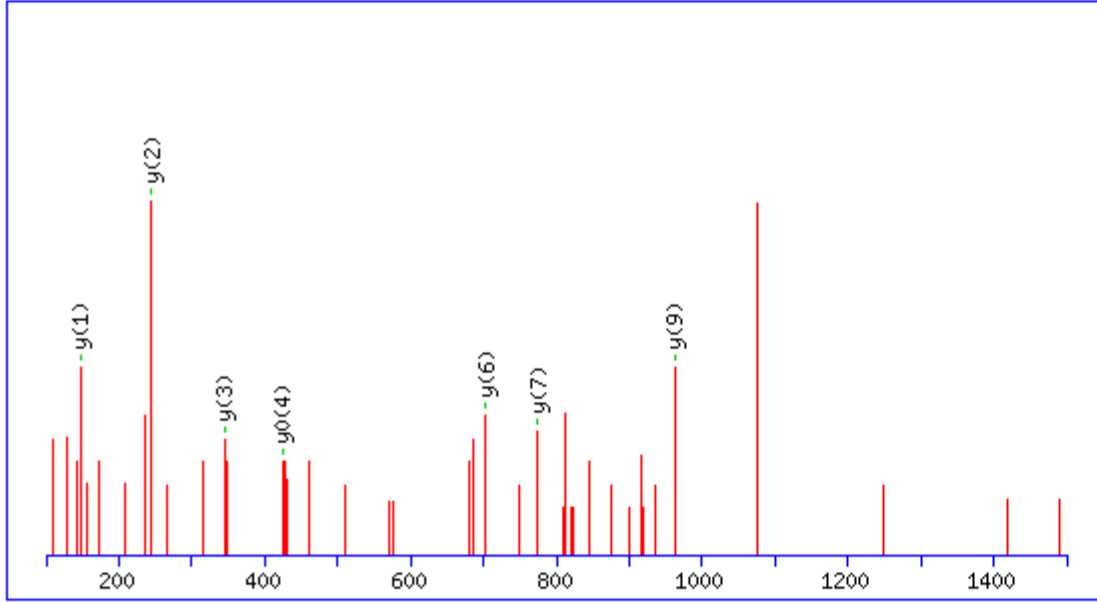

Monoisotopic mass of neutral peptide Mr(calc): 1074.537933

Fixed modifications: Propionamide (C) (apply to specified residues or termini only)

Ions Score: 51 Expect: 9.7e-005

Matches: 7/84 fragment ions using 9 most intense peaks [\(help\)](#)

| #  | b          | b <sup>++</sup> | b <sup>0</sup> | b <sup>0++</sup> | Seq. | y                 | y <sup>++</sup> | y <sup>*</sup> | y <sup>*++</sup> | y <sup>0</sup>    | y <sup>0++</sup> | #  |
|----|------------|-----------------|----------------|------------------|------|-------------------|-----------------|----------------|------------------|-------------------|------------------|----|
| 1  | 114.091340 | 57.549308       |                |                  | L    |                   |                 |                |                  |                   |                  | 10 |
| 2  | 201.123368 | 101.065322      | 183.112803     | 92.060039        | S    | <b>962.461159</b> | 481.734218      | 945.434610     | 473.220943       | 944.450594        | 472.728935       | 9  |
| 3  | 302.171047 | 151.589161      | 284.160482     | 142.583879       | T    | 875.429131        | 438.218204      | 858.402582     | 429.704929       | 857.418566        | 429.212921       | 8  |
| 4  | 373.208161 | 187.107718      | 355.197596     | 178.102436       | A    | <b>774.381452</b> | 387.694364      | 757.354903     | 379.181090       | 756.370887        | 378.689082       | 7  |
| 5  | 460.240189 | 230.623732      | 442.229624     | 221.618450       | S    | <b>703.344338</b> | 352.175807      | 686.317789     | 343.662533       | 685.333773        | 343.170525       | 6  |
| 6  | 634.286488 | 317.646882      | 616.275923     | 308.641599       | C    | 616.312310        | 308.659793      | 599.285761     | 300.146519       | 598.301745        | 299.654511       | 5  |
| 7  | 731.339252 | 366.173264      | 713.328687     | 357.167982       | P    | 442.266011        | 221.636644      | 425.239462     | 213.123369       | <b>424.255446</b> | 212.631361       | 4  |
| 8  | 832.386931 | 416.697104      | 814.376366     | 407.691821       | T    | <b>345.213247</b> | 173.110262      | 328.186698     | 164.596987       | 327.202682        | 164.104979       | 3  |
| 9  | 929.439695 | 465.223486      | 911.429130     | 456.218203       | P    | <b>244.165568</b> | 122.586422      | 227.139019     | 114.073148       |                   |                  | 2  |
| 10 |            |                 |                |                  | K    | <b>147.112804</b> | 74.060040       | 130.086255     | 65.546765        |                   |                  | 1  |

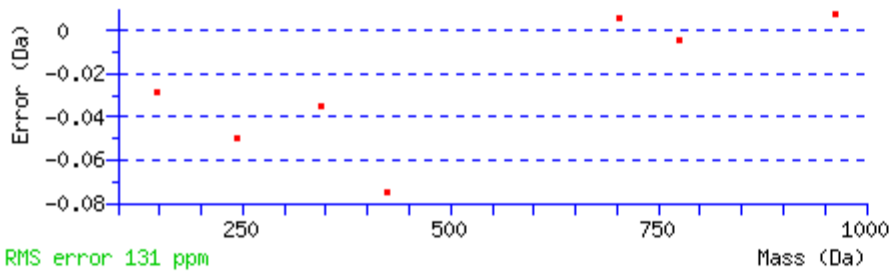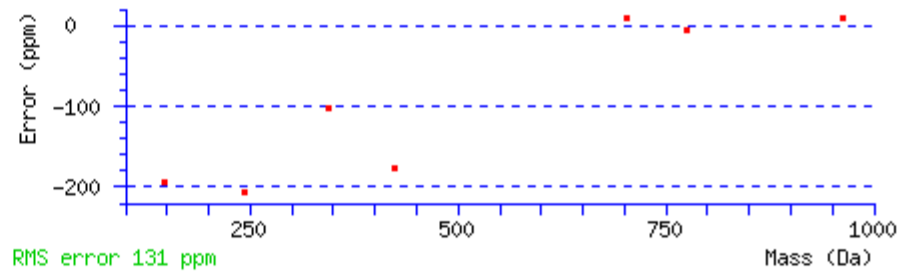

NCBI BLAST search of **LSTASCPTPK**

(Parameters: blastp, nr protein database, expect=20000, no filter, PAM30)

Other BLAST [web gateways](#)

## All matches to this query

| Score | Mr(calc):   | Delta     | Sequence                   |
|-------|-------------|-----------|----------------------------|
| 51.1  | 1074.537933 | -0.005605 | <a href="#">LSTASCPTPK</a> |
| 13.5  | 1074.541763 | -0.009435 | <a href="#">EATSADARVR</a> |
| 6.7   | 1074.534576 | -0.002248 | <a href="#">QDQLPSFPK</a>  |
| 5.5   | 1074.534561 | -0.002233 | <a href="#">SLFPEGNPAK</a> |
| 5.4   | 1074.526703 | 0.005625  | <a href="#">DMPLEEVVK</a>  |
| 2.7   | 1074.530548 | 0.001780  | <a href="#">TEGTPNQGKK</a> |
| 2.2   | 1074.528046 | 0.004282  | <a href="#">IDMPHRFK</a>   |

Mascot: <http://www.matrixscience.com/>

# **MASCOT** Mascot Search Results

## Peptide View

MS/MS Fragmentation of **TQQWTAICPLK**

Found in **GAN\_HUMAN**, Gigaxonin OS=Homo sapiens GN=GAN PE=1 SV=1

Match to Query 37112: 1358.700068 from(680.357310,2+) rtinseconds(2662) index(35885)

Title: Locus:1.1.1.2432.40

Data file 2011-11-10 - TFD - EP 3-3.mgf

Click mouse within plot area to zoom in by factor of two about that point

Or, Plot from  to  Da

Label all possible matches  Label matches used for scoring

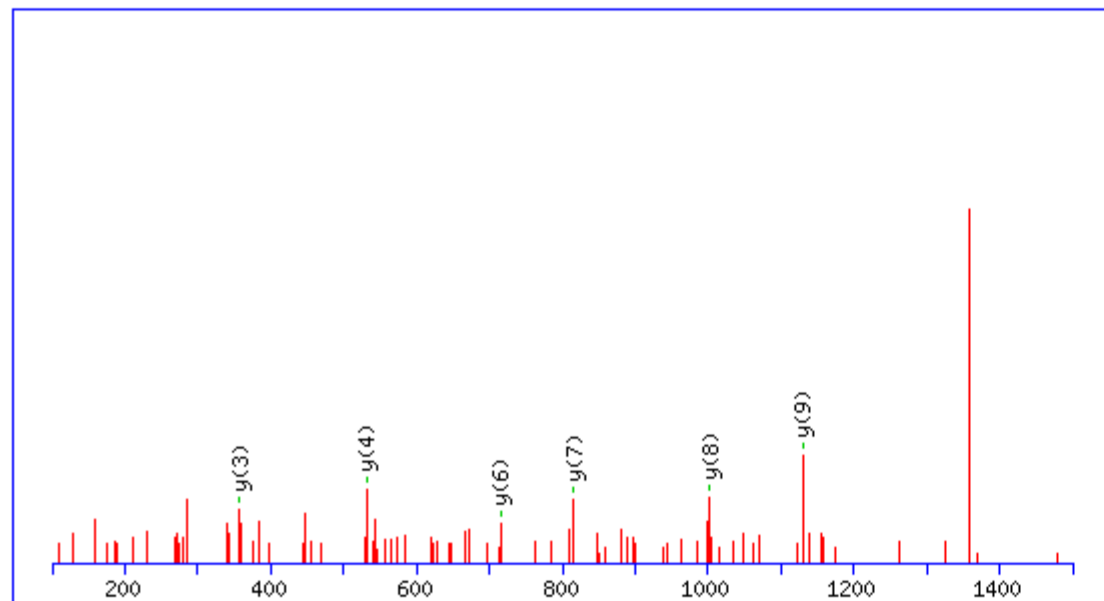

Monoisotopic mass of neutral peptide Mr(calc): 1358.701645

Fixed modifications: Propionamide (C) (apply to specified residues or termini only)

Ions Score: 34 Expect: 0.0043

Matches : 6/106 fragment ions using 13 most intense peaks ([help](#))

| #  | b           | b <sup>++</sup> | b <sup>*</sup> | b <sup>*++</sup> | b <sup>0</sup> | b <sup>0++</sup> | Seq. | y                  | y <sup>++</sup> | y <sup>*</sup> | y <sup>*++</sup> | y <sup>0</sup> | y <sup>0++</sup> | #  |
|----|-------------|-----------------|----------------|------------------|----------------|------------------|------|--------------------|-----------------|----------------|------------------|----------------|------------------|----|
| 1  | 102.054955  | 51.531116       |                |                  | 84.044390      | 42.525833        | T    |                    |                 |                |                  |                |                  | 11 |
| 2  | 230.113533  | 115.560405      | 213.086984     | 107.047130       | 212.102968     | 106.555122       | Q    | 1258.661257        | 629.834267      | 1241.634708    | 621.320992       | 1240.650692    | 620.828984       | 10 |
| 3  | 358.172111  | 179.589694      | 341.145562     | 171.076419       | 340.161546     | 170.584411       | Q    | <b>1130.602679</b> | 565.804977      | 1113.576130    | 557.291703       | 1112.592114    | 556.799695       | 9  |
| 4  | 544.251424  | 272.629350      | 527.224875     | 264.116076       | 526.240859     | 263.624068       | W    | <b>1002.544101</b> | 501.775689      | 985.517552     | 493.262414       | 984.533536     | 492.770406       | 8  |
| 5  | 645.299103  | 323.153190      | 628.272554     | 314.639915       | 627.288538     | 314.147907       | T    | <b>816.464788</b>  | 408.736032      | 799.438239     | 400.222758       | 798.454223     | 399.730750       | 7  |
| 6  | 716.336217  | 358.671747      | 699.309668     | 350.158472       | 698.325652     | 349.666464       | A    | <b>715.417109</b>  | 358.212193      | 698.390560     | 349.698918       |                |                  | 6  |
| 7  | 829.420281  | 415.213779      | 812.393732     | 406.700504       | 811.409716     | 406.208496       | I    | 644.379995         | 322.693636      | 627.353446     | 314.180361       |                |                  | 5  |
| 8  | 1003.466580 | 502.236928      | 986.440031     | 493.723654       | 985.456015     | 493.231646       | C    | <b>531.295931</b>  | 266.151604      | 514.269382     | 257.638329       |                |                  | 4  |
| 9  | 1100.519344 | 550.763310      | 1083.492795    | 542.250036       | 1082.508779    | 541.758028       | P    | <b>357.249632</b>  | 179.128454      | 340.223083     | 170.615179       |                |                  | 3  |
| 10 | 1213.603408 | 607.305342      | 1196.576859    | 598.792068       | 1195.592843    | 598.300059       | L    | 260.196868         | 130.602072      | 243.170319     | 122.088797       |                |                  | 2  |
| 11 |             |                 |                |                  |                |                  | K    | 147.112804         | 74.060040       | 130.086255     | 65.546765        |                |                  | 1  |

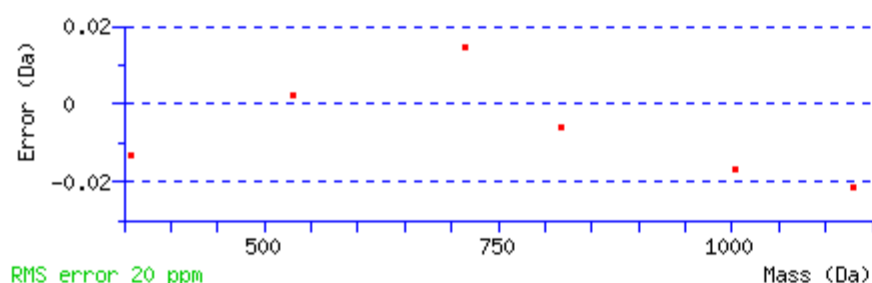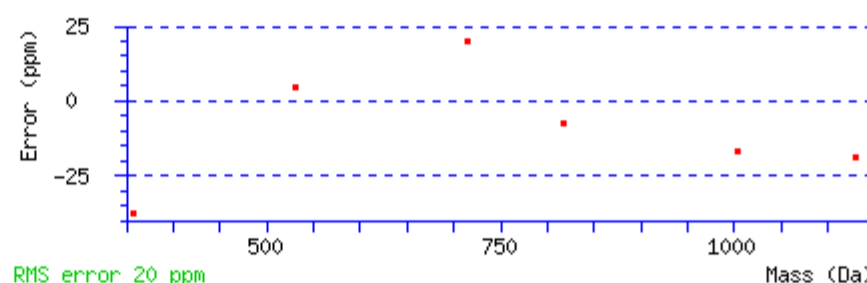

NCBI BLAST search of **TQQWTAICPLK**

(Parameters: blastp, nr protein database, expect=20000, no filter, PAM30)

Other BLAST [web gateways](#)

All matches to this query

| Score | Mr(calc):   | Delta     | Sequence                    |
|-------|-------------|-----------|-----------------------------|
| 33.5  | 1358.701645 | -0.001577 | <a href="#">TQQWTAICPLK</a> |

Mascot: <http://www.matrixscience.com/>

# MASCOT SEARCH RESULTS

## Peptide View

MS/MS Fragmentation of **LLLSTLTLLSK**

Found in **GNA1\_HUMAN**, Glucosamine 6-phosphate N-acetyltransferase OS=Homo sapiens GN=GPNAT1 PE=1 SV=1

Match to Query 30381: 1200.772008 from(601.393280,2+) rtinseconds(3729) index(51331)

Title: Locus:1.1.1.2569.10

Data file 2011-11-12 - TFD - EP 6-6.mgf

Click mouse within plot area to zoom in by factor of two about that point

Or, Plot from  to  Da

Label all possible matches  Label matches used for scoring

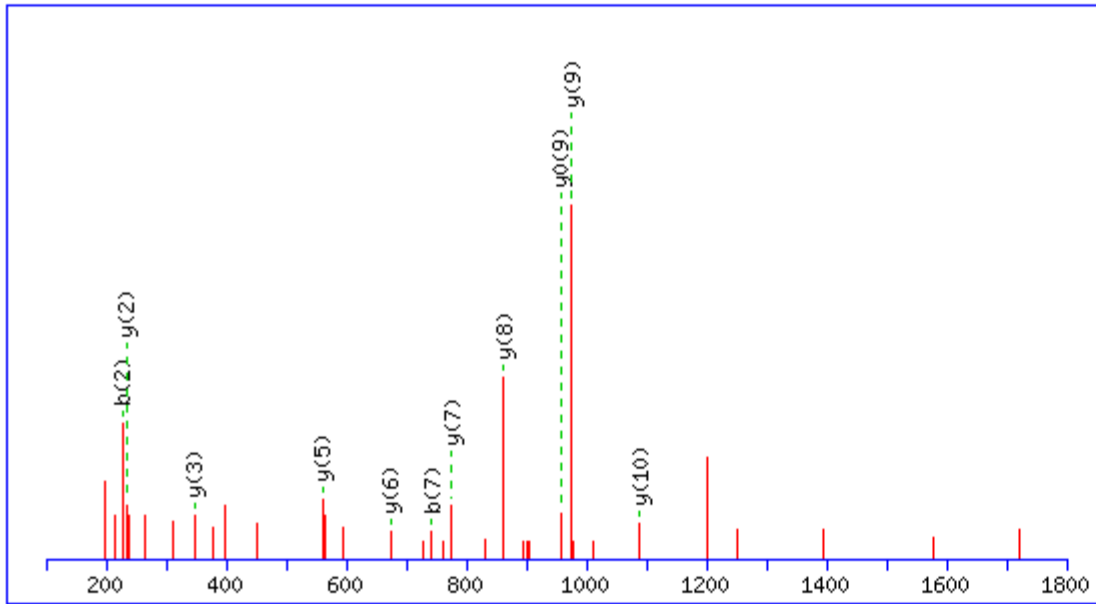

Monoisotopic mass of neutral peptide  $M_r(\text{calc})$ : 1200.769302

Fixed modifications: Propionamide (C) (apply to specified residues or termini only)

Ions Score: 58 Expect: 1.4e-006

Matches : 11/92 fragment ions using 22 most intense peaks ([help](#))

| #  | b                 | b <sup>++</sup> | b <sup>0</sup> | b <sup>0++</sup> | Seq. | y                  | y <sup>++</sup> | y <sup>*</sup> | y <sup>*++</sup> | y <sup>0</sup>    | y <sup>0++</sup> | #  |
|----|-------------------|-----------------|----------------|------------------|------|--------------------|-----------------|----------------|------------------|-------------------|------------------|----|
| 1  | 114.091340        | 57.549308       |                |                  | L    |                    |                 |                |                  |                   |                  | 11 |
| 2  | <b>227.175404</b> | 114.091340      |                |                  | L    | <b>1088.692538</b> | 544.849907      | 1071.665989    | 536.336633       | 1070.681973       | 535.844625       | 10 |
| 3  | 340.259468        | 170.633372      |                |                  | L    | <b>975.608474</b>  | 488.307875      | 958.581925     | 479.794601       | <b>957.597909</b> | 479.302593       | 9  |
| 4  | 427.291496        | 214.149386      | 409.280931     | 205.144104       | S    | <b>862.524410</b>  | 431.765843      | 845.497861     | 423.252569       | 844.513845        | 422.760561       | 8  |
| 5  | 528.339175        | 264.673226      | 510.328610     | 255.667943       | T    | <b>775.492382</b>  | 388.249829      | 758.465833     | 379.736555       | 757.481817        | 379.244547       | 7  |
| 6  | 641.423239        | 321.215258      | 623.412674     | 312.209975       | L    | <b>674.444703</b>  | 337.725990      | 657.418154     | 329.212715       | 656.434138        | 328.720707       | 6  |
| 7  | <b>742.470918</b> | 371.739097      | 724.460353     | 362.733815       | T    | <b>561.360639</b>  | 281.183958      | 544.334090     | 272.670683       | 543.350074        | 272.178675       | 5  |
| 8  | 855.554982        | 428.281129      | 837.544417     | 419.275847       | L    | 460.312960         | 230.660118      | 443.286411     | 222.146843       | 442.302395        | 221.654835       | 4  |
| 9  | 968.639046        | 484.823161      | 950.628481     | 475.817879       | L    | <b>347.228896</b>  | 174.118086      | 330.202347     | 165.604811       | 329.218331        | 165.112803       | 3  |
| 10 | 1055.671074       | 528.339175      | 1037.660509    | 519.333893       | S    | <b>234.144832</b>  | 117.576054      | 217.118283     | 109.062779       | 216.134267        | 108.570771       | 2  |
| 11 |                   |                 |                |                  | K    | 147.112804         | 74.060040       | 130.086255     | 65.546765        |                   |                  | 1  |

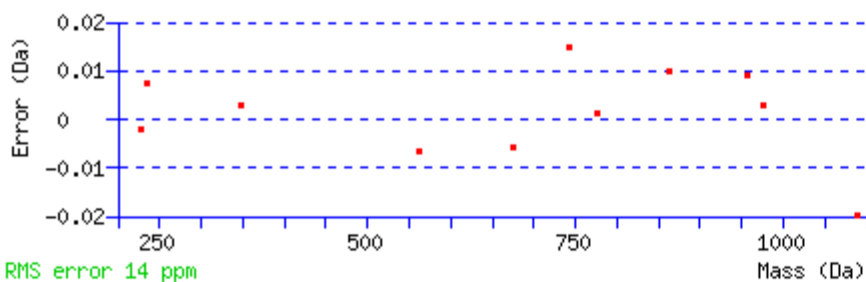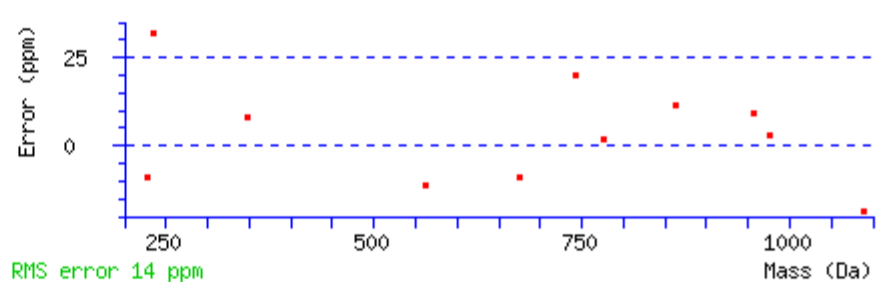

NCBI BLAST search of [LLLSTLTLLSK](#)

(Parameters: blastp, nr protein database, expect=20000, no filter, PAM30)

Other BLAST [web gateways](#)

## All matches to this query

| Score | $M_r(\text{calc})$ : | Delta    | Sequence                    |
|-------|----------------------|----------|-----------------------------|
| 58.4  | 1200.769302          | 0.002706 | <a href="#">LLLSTLTLLSK</a> |

Mascot: <http://www.matrixscience.com/>

# {MATRIX} SCIENCE Mascot Search Results

## Peptide View

MS/MS Fragmentation of **IAVTGTGAHPAFK**

Found in **GPX7\_HUMAN**, Glutathione peroxidase 7 OS=Homo sapiens GN=GPX7 PE=1 SV=1

Match to Query 34039: 1268.675868 from(635.345210,2+) rtinseconds(1686) index(15853)

Title: Locus:1.1.1.2136.43

Data file 2011-11-10 - TFD - EP 4-2.mgf

Click mouse within plot area to zoom in by factor of two about that point

Or, Plot from  to  Da

Label all possible matches  Label matches used for scoring

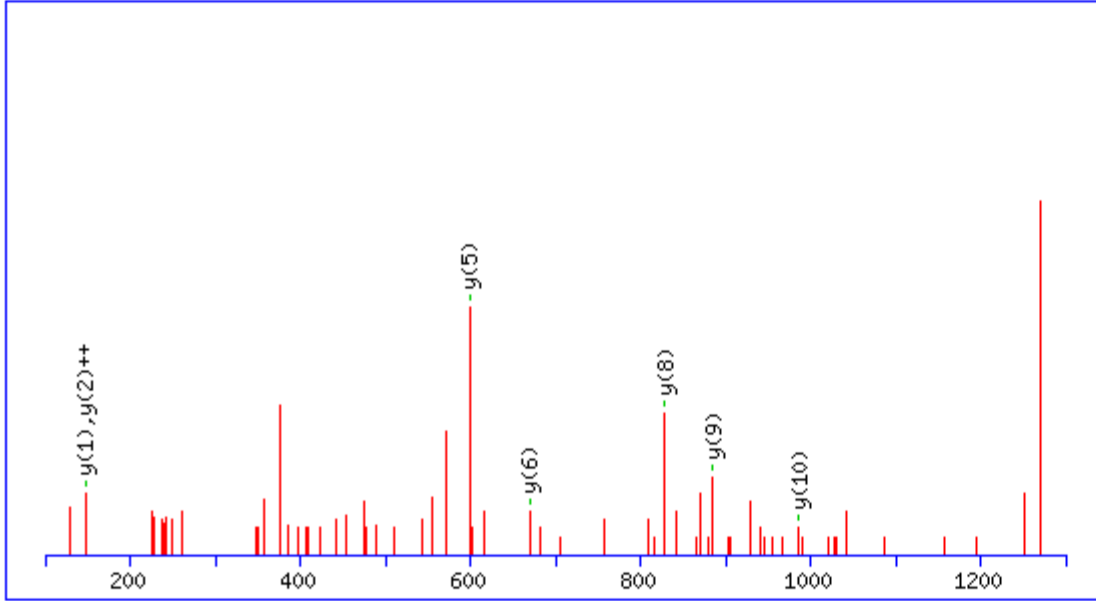

Monoisotopic mass of neutral peptide Mr(calc): 1268.687729

Fixed modifications: Propionamide (C) (apply to specified residues or termini only)

Ions Score: 37 Expect: 0.0043

Matches : 7/100 fragment ions using 12 most intense peaks ([help](#))

| #  | b           | b <sup>++</sup> | b <sup>0</sup> | b <sup>0++</sup> | Seq. | y                 | y <sup>++</sup>   | y <sup>+</sup> | y <sup>***</sup> | y <sup>0</sup> | y <sup>0++</sup> | #  |
|----|-------------|-----------------|----------------|------------------|------|-------------------|-------------------|----------------|------------------|----------------|------------------|----|
| 1  | 114.091340  | 57.549308       |                |                  | I    |                   |                   |                |                  |                |                  | 13 |
| 2  | 185.128454  | 93.067865       |                |                  | A    | 1156.610936       | 578.809106        | 1139.584387    | 570.295832       | 1138.600371    | 569.803824       | 12 |
| 3  | 284.196868  | 142.602072      |                |                  | V    | 1085.573822       | 543.290549        | 1068.547273    | 534.777275       | 1067.563257    | 534.285267       | 11 |
| 4  | 385.244547  | 193.125912      | 367.233982     | 184.120629       | T    | <b>986.505408</b> | 493.756342        | 969.478859     | 485.243068       | 968.494843     | 484.751060       | 10 |
| 5  | 442.266011  | 221.636643      | 424.255446     | 212.631361       | G    | <b>885.457729</b> | 443.232503        | 868.431180     | 434.719228       | 867.447164     | 434.227220       | 9  |
| 6  | 543.313690  | 272.160483      | 525.303125     | 263.155201       | T    | <b>828.436265</b> | 414.721771        | 811.409716     | 406.208496       | 810.425700     | 405.716488       | 8  |
| 7  | 600.335154  | 300.671215      | 582.324589     | 291.665933       | G    | 727.388586        | 364.197931        | 710.362037     | 355.684657       |                |                  | 7  |
| 8  | 671.372268  | 336.189772      | 653.361703     | 327.184490       | A    | <b>670.367122</b> | 335.687199        | 653.340573     | 327.173925       |                |                  | 6  |
| 9  | 808.431180  | 404.719228      | 790.420615     | 395.713946       | H    | <b>599.330008</b> | 300.168642        | 582.303459     | 291.655368       |                |                  | 5  |
| 10 | 905.483944  | 453.245610      | 887.473379     | 444.240328       | P    | 462.271096        | 231.639186        | 445.244547     | 223.125912       |                |                  | 4  |
| 11 | 976.521058  | 488.764167      | 958.510493     | 479.758885       | A    | 365.218332        | 183.112804        | 348.191783     | 174.599530       |                |                  | 3  |
| 12 | 1123.589472 | 562.298374      | 1105.578907    | 553.293092       | F    | 294.181218        | <b>147.594247</b> | 277.154669     | 139.080973       |                |                  | 2  |
| 13 |             |                 |                |                  | K    | <b>147.112804</b> | 74.060040         | 130.086255     | 65.546765        |                |                  | 1  |

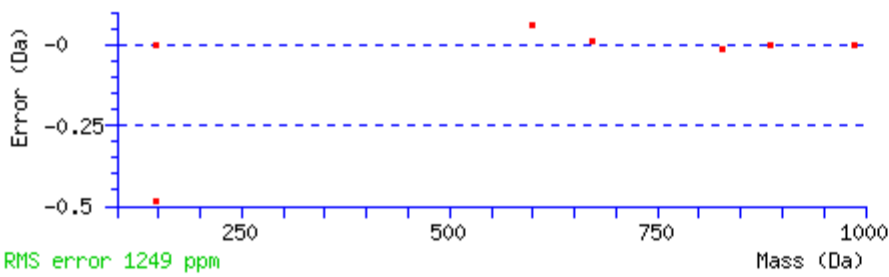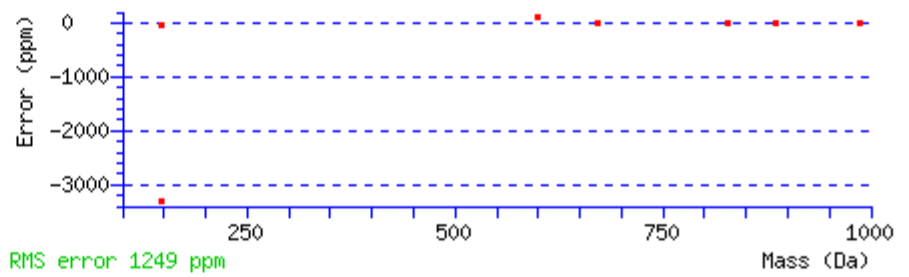

NCBI BLAST search of **IAVTGTGAHPAFK**

(Parameters: blastp, nr protein database, expect=20000, no filter, PAM30)

Other BLAST [web gateways](#)

## All matches to this query

| Score | Mr(calc):   | Delta     | Sequence                      |
|-------|-------------|-----------|-------------------------------|
| 37.0  | 1268.687729 | -0.011861 | <a href="#">IAVTGTGAHPAFK</a> |
| 5.2   | 1268.665924 | 0.009944  | <a href="#">LSAPVSQKMHR</a>   |
| 3.8   | 1268.672440 | 0.003428  | <a href="#">QLSLPQQEAQK</a>   |
| 2.8   | 1268.679855 | -0.003987 | <a href="#">ASAQVVMPIPK</a>   |
| 2.8   | 1268.679855 | -0.003987 | <a href="#">ASAQVVMPIPK</a>   |
| 2.8   | 1268.679855 | -0.003987 | <a href="#">ASAQVVMPIPK</a>   |
| 1.5   | 1268.683685 | -0.007817 | <a href="#">KIPSQQDALGGR</a>  |
| 1.4   | 1268.687698 | -0.011830 | <a href="#">ERIWPALQPK</a>    |
| 1.2   | 1268.679855 | -0.003987 | <a href="#">ASAQVVMPIPK</a>   |
| 1.2   | 1268.683685 | -0.007817 | <a href="#">KPPSGSQAPRTK</a>  |

Mascot: <http://www.matrixscience.com/>

# MASCOT Search Results

## Peptide View

MS/MS Fragmentation of **VPTPDVSVVDLTCR**

Found in **G3PT\_HUMAN**, Glyceraldehyde-3-phosphate dehydrogenase, testis-specific OS=Homo sapiens GN=GAPDHS PE=1 SV=2

Match to Query 47315: 1572.786252 from(525.269360,3+) rtinseconds(2025) index(23178)

Title: Locus:1.1.1.1153.19

Data file 2012-01-27 - TFD - Epitel - IEC - 10ul - 2.mgf

Click mouse within plot area to zoom in by factor of two about that point

Or,   to  Da

Label all possible matches  Label matches used for scoring

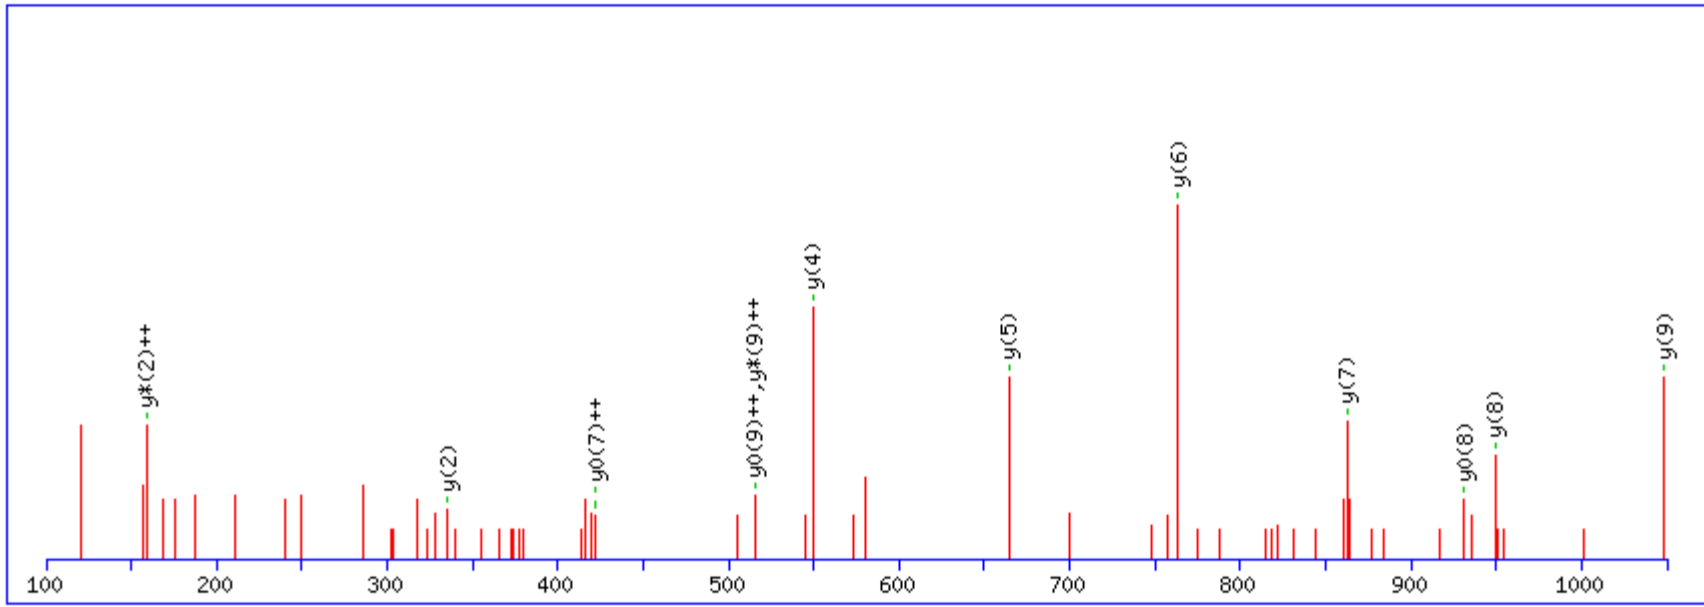

Monoisotopic mass of neutral peptide  $M_r(\text{calc})$ : 1572.781799

Fixed modifications: Carbamidomethyl (C) (apply to specified residues or termini only)

Variable modifications:

P4 : Oxidation (P)

Ions Score: 43 Expect: 0.00016

Matches : 12/122 fragment ions using 19 most intense peaks ([help](#))

| #  | b           | b <sup>++</sup> | b <sup>0</sup> | b <sup>0++</sup> | Seq. | y                  | y <sup>++</sup> | y <sup>*</sup> | y <sup>*++</sup>  | y <sup>0</sup>    | y <sup>0++</sup>  | #  |
|----|-------------|-----------------|----------------|------------------|------|--------------------|-----------------|----------------|-------------------|-------------------|-------------------|----|
| 1  | 100.075690  | 50.541483       |                |                  | V    |                    |                 |                |                   |                   |                   | 14 |
| 2  | 197.128454  | 99.067865       |                |                  | P    | 1474.720622        | 737.863949      | 1457.694073    | 729.350674        | 1456.710057       | 728.858666        | 13 |
| 3  | 298.176133  | 149.591704      | 280.165568     | 140.586422       | T    | 1377.667858        | 689.337567      | 1360.641309    | 680.824293        | 1359.657293       | 680.332285        | 12 |
| 4  | 411.223812  | 206.115544      | 393.213247     | 197.110262       | P    | 1276.620179        | 638.813727      | 1259.593630    | 630.300453        | 1258.609614       | 629.808445        | 11 |
| 5  | 526.250755  | 263.629016      | 508.240190     | 254.623733       | D    | 1163.572500        | 582.289888      | 1146.545951    | 573.776614        | 1145.561935       | 573.284606        | 10 |
| 6  | 625.319169  | 313.163223      | 607.308604     | 304.157940       | V    | <b>1048.545557</b> | 524.776416      | 1031.519008    | <b>516.263142</b> | 1030.534992       | <b>515.771134</b> | 9  |
| 7  | 712.351197  | 356.679237      | 694.340632     | 347.673954       | S    | <b>949.477143</b>  | 475.242210      | 932.450594     | 466.728935        | <b>931.466578</b> | 466.236927        | 8  |
| 8  | 811.419611  | 406.213443      | 793.409046     | 397.208161       | V    | <b>862.445115</b>  | 431.726196      | 845.418566     | 423.212921        | 844.434550        | <b>422.720913</b> | 7  |
| 9  | 910.488025  | 455.747650      | 892.477460     | 446.742368       | V    | <b>763.376701</b>  | 382.191989      | 746.350152     | 373.678714        | 745.366136        | 373.186706        | 6  |
| 10 | 1025.514968 | 513.261122      | 1007.504403    | 504.255839       | D    | <b>664.308287</b>  | 332.657782      | 647.281738     | 324.144507        | 646.297722        | 323.652499        | 5  |
| 11 | 1138.599032 | 569.803154      | 1120.588467    | 560.797871       | L    | <b>549.281344</b>  | 275.144310      | 532.254795     | 266.631036        | 531.270779        | 266.139028        | 4  |
| 12 | 1239.646711 | 620.326993      | 1221.636146    | 611.321711       | T    | 436.197280         | 218.602278      | 419.170731     | 210.089003        | 418.186715        | 209.596995        | 3  |
| 13 | 1399.677360 | 700.342318      | 1381.666795    | 691.337035       | C    | <b>335.149601</b>  | 168.078438      | 318.123052     | <b>159.565164</b> |                   |                   | 2  |
| 14 |             |                 |                |                  | R    | 175.118952         | 88.063114       | 158.092403     | 79.549839         |                   |                   | 1  |

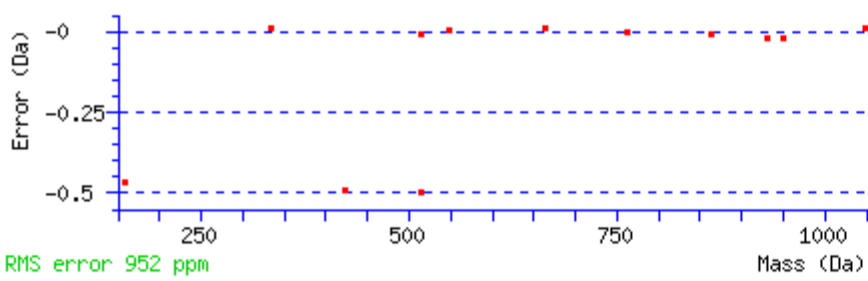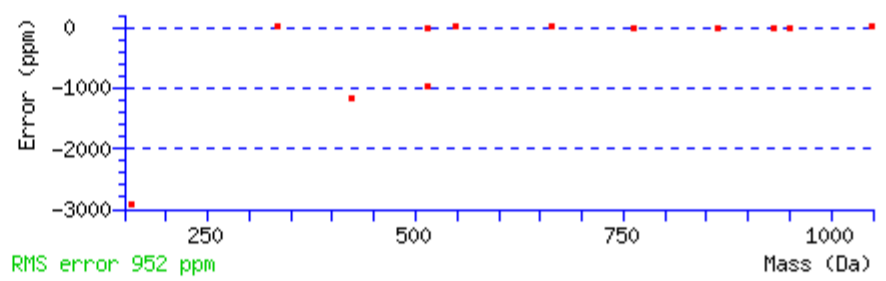

NCBI BLAST search of [VPTPDVSVVDLTCR](#)

(Parameters: blastp, nr protein database, expect=20000, no filter, PAM30)

Other BLAST [web gateways](#)

## All matches to this query

| Score | $M_r(\text{calc})$ | Delta    | Sequence                        |
|-------|--------------------|----------|---------------------------------|
| 43.0  | 1572.781799        | 0.004453 | <a href="#">VPTPDVSVVDLTCR</a>  |
| 43.0  | 1572.781799        | 0.004453 | <a href="#">VPTPDVSVVDLTCR</a>  |
| 2.5   | 1572.785782        | 0.000470 | <a href="#">TSMASLFSFTSPAVK</a> |
| 2.0   | 1572.775223        | 0.011029 | <a href="#">KPNAVPKACCAPT</a>   |

Mascot: <http://www.matrixscience.com/>

# MASCOT Search Results

## Peptide View

MS/MS Fragmentation of **DVGS<sup>L</sup>DFEDLPLYK**

Found in **GDPD3\_HUMAN**, Glycerophosphodiester phosphodiesterase domain-containing protein 3 OS=Homo sapiens GN=GDPD3 PE=2 SV=3

Match to Query 52476: 1609.791548 from(805.903050,2+) rtinseconds(3734) index(55359)

Title: Locus:1.1.1.2801.36

Data file 2011-11-14 - TFD - EP 8-4.mgf

Click mouse within plot area to zoom in by factor of two about that point

Or, Plot from  to  Da

Label all possible matches  Label matches used for scoring

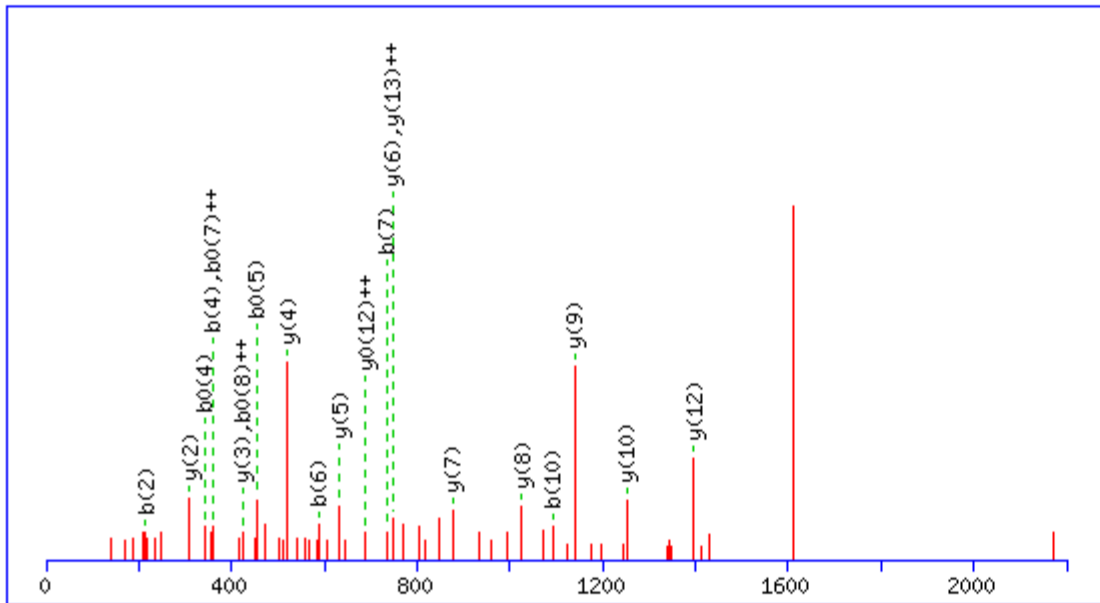

Monoisotopic mass of neutral peptide Mr(calc): 1609.787552

Fixed modifications: Propionamide (C) (apply to specified residues or termini only)

Ions Score: 80 Expect: 1.3e-007

Matches : 21/120 fragment ions using 26 most intense peaks [\(help\)](#)

| #  | b                  | b <sup>++</sup> | b <sup>0</sup>    | b <sup>0++</sup>  | Seq. | y                  | y <sup>++</sup>   | y <sup>*</sup> | y <sup>++</sup> | y <sup>0</sup> | y <sup>0++</sup>  | #  |
|----|--------------------|-----------------|-------------------|-------------------|------|--------------------|-------------------|----------------|-----------------|----------------|-------------------|----|
| 1  | 116.034219         | 58.520748       | 98.023654         | 49.515465         | D    |                    |                   |                |                 |                |                   | 14 |
| 2  | <b>215.102633</b>  | 108.054954      | 197.092068        | 99.049672         | V    | 1495.767888        | <b>748.387582</b> | 1478.741339    | 739.874307      | 1477.757323    | 739.382299        | 13 |
| 3  | 272.124097         | 136.565687      | 254.113532        | 127.560404        | G    | <b>1396.699474</b> | 698.853375        | 1379.672925    | 690.340101      | 1378.688909    | <b>689.848093</b> | 12 |
| 4  | <b>359.156125</b>  | 180.081701      | <b>341.145560</b> | 171.076418        | S    | 1339.678010        | 670.342643        | 1322.651461    | 661.829368      | 1321.667445    | 661.337360        | 11 |
| 5  | 472.240189         | 236.623733      | <b>454.229624</b> | 227.618450        | L    | <b>1252.645982</b> | 626.826629        | 1235.619433    | 618.313354      | 1234.635417    | 617.821346        | 10 |
| 6  | <b>587.267132</b>  | 294.137204      | 569.256567        | 285.131922        | D    | <b>1139.561918</b> | 570.284597        | 1122.535369    | 561.771323      | 1121.551353    | 561.279314        | 9  |
| 7  | <b>734.335546</b>  | 367.671411      | 716.324981        | <b>358.666129</b> | F    | <b>1024.534975</b> | 512.771125        | 1007.508426    | 504.257851      | 1006.524410    | 503.765843        | 8  |
| 8  | 863.378139         | 432.192708      | 845.367574        | <b>423.187425</b> | E    | <b>877.466561</b>  | 439.236919        | 860.440012     | 430.723644      | 859.455996     | 430.231636        | 7  |
| 9  | 978.405082         | 489.706179      | 960.394517        | 480.700897        | D    | <b>748.423968</b>  | 374.715622        | 731.397419     | 366.202347      | 730.413403     | 365.710339        | 6  |
| 10 | <b>1091.489146</b> | 546.248211      | 1073.478581       | 537.242928        | L    | <b>633.397025</b>  | 317.202151        | 616.370476     | 308.688876      |                |                   | 5  |
| 11 | 1188.541910        | 594.774593      | 1170.531345       | 585.769310        | P    | <b>520.312961</b>  | 260.660119        | 503.286412     | 252.146844      |                |                   | 4  |
| 12 | 1301.625974        | 651.316625      | 1283.615409       | 642.311342        | L    | <b>423.260197</b>  | 212.133736        | 406.233648     | 203.620462      |                |                   | 3  |
| 13 | 1464.689303        | 732.848289      | 1446.678738       | 723.843007        | Y    | <b>310.176133</b>  | 155.591705        | 293.149584     | 147.078430      |                |                   | 2  |
| 14 |                    |                 |                   |                   | K    | 147.112804         | 74.060040         | 130.086255     | 65.546765       |                |                   | 1  |

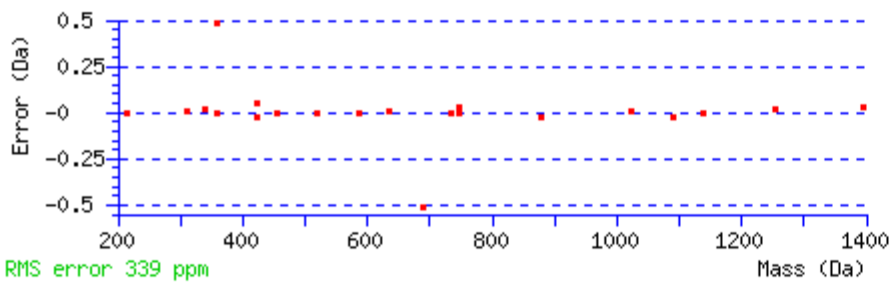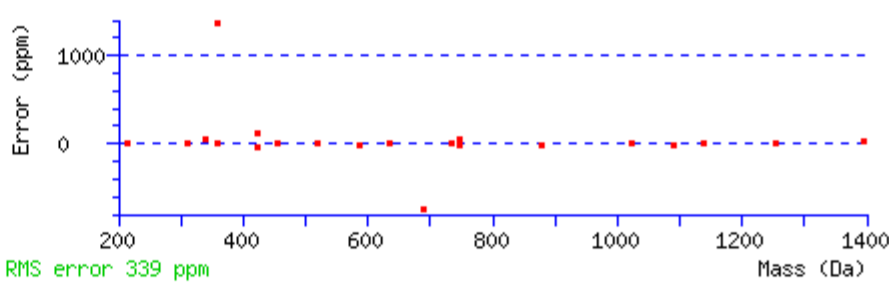

NCBI BLAST search of **DVGS<sup>L</sup>DFEDLPLYK**

(Parameters: blastp, nr protein database, expect=20000, no filter, PAM30)

Other BLAST [web gateways](#)

## All matches to this query

| Score | Mr(calc):   | Delta    | Sequence                                  |
|-------|-------------|----------|-------------------------------------------|
| 79.6  | 1609.787552 | 0.003996 | <a href="#">DVGS<sup>L</sup>DFEDLPLYK</a> |
| 8.9   | 1609.783569 | 0.007979 | <a href="#">TPGPPGLTTTPAPPDK</a>          |
| 6.3   | 1609.783569 | 0.007979 | <a href="#">TPGPPGLTTTPAPPDK</a>          |
| 1.7   | 1609.783569 | 0.007979 | <a href="#">TPGPPGLTTTPAPPDK</a>          |

# MASCOT SCIENCE Mascot Search Results

## Peptide View

MS/MS Fragmentation of **GADVFLAALAR**

Found in **GYS1\_HUMAN**, Glycogen [starch] synthase, muscle OS=Homo sapiens GN=GYS1 PE=1 SV=2

Match to Query 27240: 1160.618528 from(581.316540,2+) rtinseconds(3470) index(49312)

Title: Locus:1.1.1.2704.10

Data file 2011-11-12 - TFD - EP 6-2.mgf

Click mouse within plot area to zoom in by factor of two about that point

Or, Plot from  to  Da

Label all possible matches  Label matches used for scoring

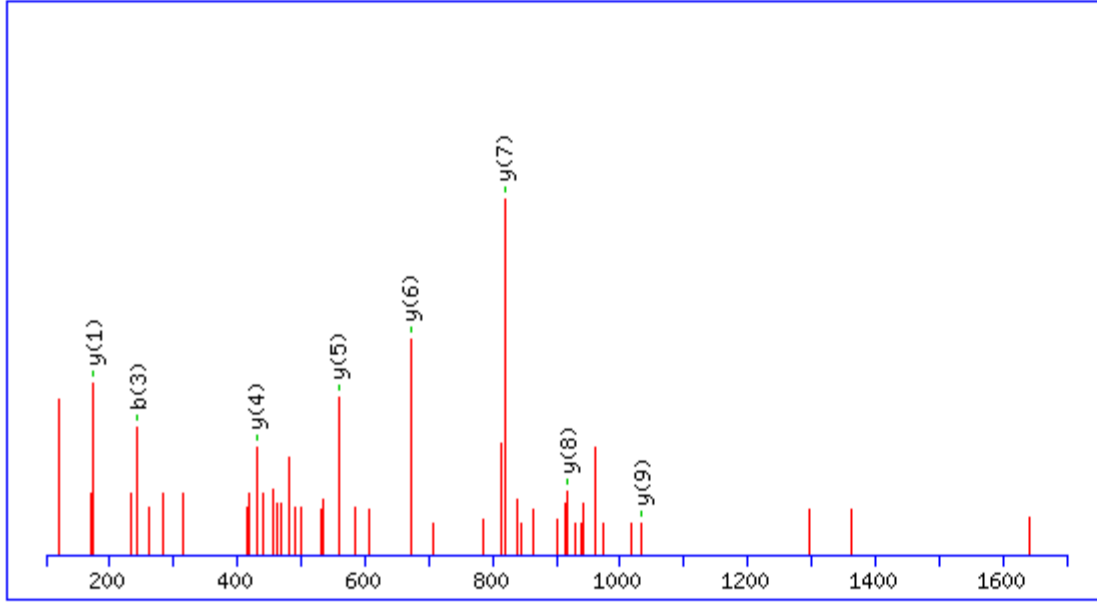

Monoisotopic mass of neutral peptide Mr(calc): 1160.618958

Fixed modifications: Propionamide (C) (apply to specified residues or termini only)

Ions Score: 59 Expect: 9e-006

Matches : 8/88 fragment ions using 10 most intense peaks ([help](#))

| #  | b                 | b <sup>++</sup> | b <sup>0</sup> | b <sup>0++</sup> | Seq.     | y                  | y <sup>++</sup> | y <sup>*</sup> | y <sup>*++</sup> | y <sup>0</sup> | y <sup>0++</sup> | #  |
|----|-------------------|-----------------|----------------|------------------|----------|--------------------|-----------------|----------------|------------------|----------------|------------------|----|
| 1  | 58.028740         | 29.518008       |                |                  | <b>G</b> |                    |                 |                |                  |                |                  | 11 |
| 2  | 129.065854        | 65.036565       |                |                  | <b>A</b> | 1104.604786        | 552.806031      | 1087.578237    | 544.292757       | 1086.594221    | 543.800749       | 10 |
| 3  | <b>244.092797</b> | 122.550037      | 226.082232     | 113.544754       | <b>D</b> | <b>1033.567672</b> | 517.287474      | 1016.541123    | 508.774200       | 1015.557107    | 508.282192       | 9  |
| 4  | 343.161211        | 172.084244      | 325.150646     | 163.078961       | <b>V</b> | <b>918.540729</b>  | 459.774003      | 901.514180     | 451.260728       | 900.530164     | 450.768720       | 8  |
| 5  | 490.229625        | 245.618450      | 472.219060     | 236.613168       | <b>F</b> | <b>819.472315</b>  | 410.239796      | 802.445766     | 401.726521       | 801.461750     | 401.234513       | 7  |
| 6  | 603.313689        | 302.160483      | 585.303124     | 293.155200       | <b>L</b> | <b>672.403901</b>  | 336.705589      | 655.377352     | 328.192314       | 654.393336     | 327.700306       | 6  |
| 7  | 732.356282        | 366.681779      | 714.345717     | 357.676497       | <b>E</b> | <b>559.319837</b>  | 280.163557      | 542.293288     | 271.650282       | 541.309272     | 271.158274       | 5  |
| 8  | 803.393396        | 402.200336      | 785.382831     | 393.195054       | <b>A</b> | <b>430.277244</b>  | 215.642260      | 413.250695     | 207.128985       |                |                  | 4  |
| 9  | 916.477460        | 458.742368      | 898.466895     | 449.737086       | <b>L</b> | 359.240130         | 180.123703      | 342.213581     | 171.610428       |                |                  | 3  |
| 10 | 987.514574        | 494.260925      | 969.504009     | 485.255643       | <b>A</b> | 246.156066         | 123.581671      | 229.129517     | 115.068396       |                |                  | 2  |
| 11 |                   |                 |                |                  | <b>R</b> | <b>175.118952</b>  | 88.063114       | 158.092403     | 79.549839        |                |                  | 1  |

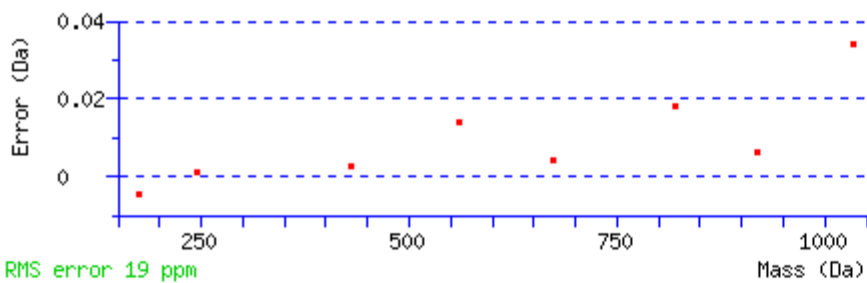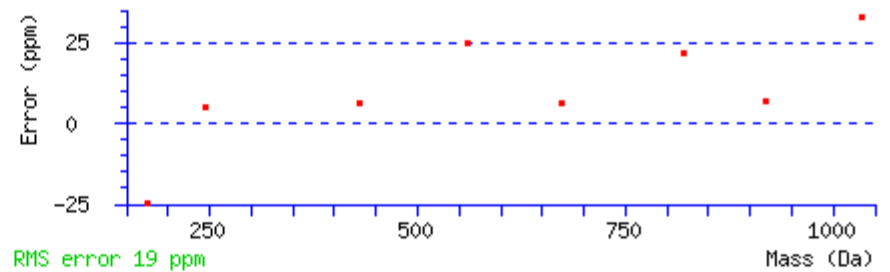

NCBI BLAST search of **GADVFLAALAR**

(Parameters: blastp, nr protein database, expect=20000, no filter, PAM30)

Other BLAST [web gateways](#)

## All matches to this query

| Score | Mr(calc):   | Delta     | Sequence                    |
|-------|-------------|-----------|-----------------------------|
| 58.6  | 1160.618958 | -0.000430 | <a href="#">GADVFLAALAR</a> |
| 4.5   | 1160.618973 | -0.000445 | <a href="#">QSSFILTPPR</a>  |
| 4.5   | 1160.618973 | -0.000445 | <a href="#">QSSFILTPPR</a>  |
| 3.3   | 1160.618958 | -0.000430 | <a href="#">EIVNFSPIAR</a>  |
| 3.1   | 1160.614914 | 0.003614  | <a href="#">SRLEALSTER</a>  |
| 0.7   | 1160.618973 | -0.000445 | <a href="#">VTFEGPLLNR</a>  |

Mascot: <http://www.matrixscience.com/>

# MASCOT SCIENCE Mascot Search Results

## Peptide View

MS/MS Fragmentation of **ITTDACWGR**

Found in **GPHB5\_HUMAN**, Glycoprotein hormone beta-5 OS=Homo sapiens GN=GPHB5 PE=1 SV=1

Match to Query 366552: 1078.489828 from(540.252190,2+) rtinseconds(1750) index(671712)

Title: Locus:1.1.1.1334.31

Data file C:\Program Files (x86)\Matrix Science\Mascot Daemon\mgf3 TFD - Epitel - R2\mascot\_daemon\_merge.mgf

Click mouse within plot area to zoom in by factor of two about that point

Or, Plot from  to  Da

Label all possible matches  Label matches used for scoring

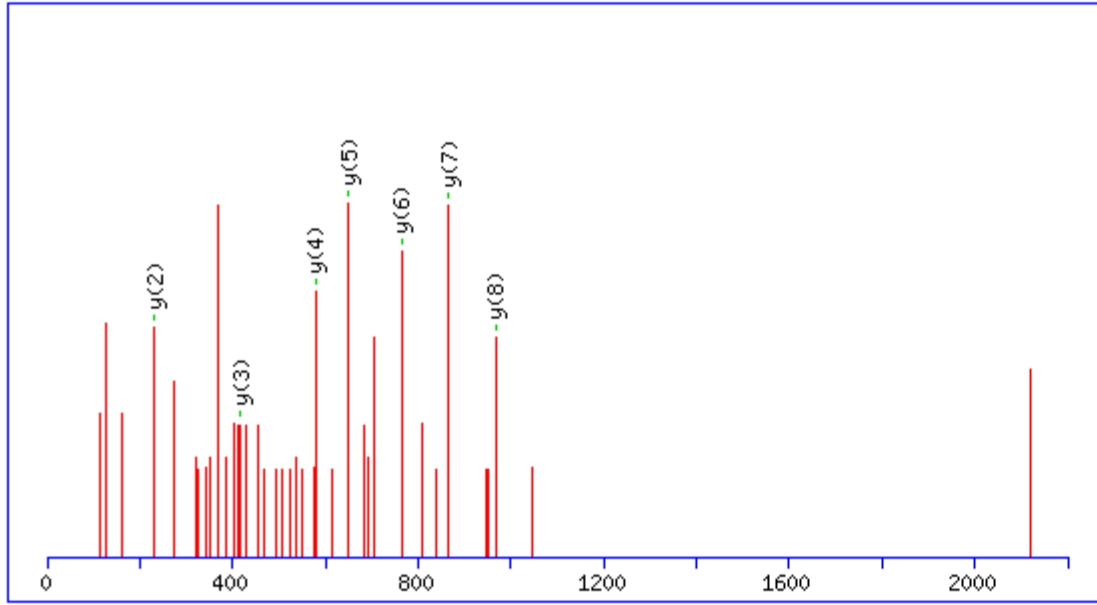

Monoisotopic mass of neutral peptide Mr(calc): 1078.486588

Fixed modifications: Carbamidomethyl (C) (apply to specified residues or termini only)

Ions Score: 60 Expect: 5.9e-006

Matches : 7/68 fragment ions using 10 most intense peaks [\(help\)](#)

| # | b          | b <sup>++</sup> | b <sup>0</sup> | b <sup>0++</sup> | Seq. | y                 | y <sup>++</sup> | y <sup>*</sup> | y <sup>*++</sup> | y <sup>0</sup> | y <sup>0++</sup> | # |
|---|------------|-----------------|----------------|------------------|------|-------------------|-----------------|----------------|------------------|----------------|------------------|---|
| 1 | 114.091340 | 57.549308       |                |                  | I    |                   |                 |                |                  |                |                  | 9 |
| 2 | 215.139019 | 108.073147      | 197.128454     | 99.067865        | T    | <b>966.409793</b> | 483.708535      | 949.383244     | 475.195260       | 948.399228     | 474.703252       | 8 |
| 3 | 316.186698 | 158.596987      | 298.176133     | 149.591704       | T    | <b>865.362114</b> | 433.184695      | 848.335565     | 424.671421       | 847.351549     | 424.179413       | 7 |
| 4 | 431.213641 | 216.110458      | 413.203076     | 207.105176       | D    | <b>764.314435</b> | 382.660856      | 747.287886     | 374.147581       | 746.303870     | 373.655573       | 6 |
| 5 | 502.250755 | 251.629015      | 484.240190     | 242.623733       | A    | <b>649.287492</b> | 325.147384      | 632.260943     | 316.634110       |                |                  | 5 |
| 6 | 662.281404 | 331.644340      | 644.270839     | 322.639058       | C    | <b>578.250378</b> | 289.628827      | 561.223829     | 281.115553       |                |                  | 4 |
| 7 | 848.360717 | 424.683997      | 830.350152     | 415.678714       | W    | <b>418.219729</b> | 209.613503      | 401.193180     | 201.100228       |                |                  | 3 |
| 8 | 905.382181 | 453.194729      | 887.371616     | 444.189446       | G    | <b>232.140416</b> | 116.573846      | 215.113867     | 108.060572       |                |                  | 2 |
| 9 |            |                 |                |                  | R    | 175.118952        | 88.063114       | 158.092403     | 79.549840        |                |                  | 1 |

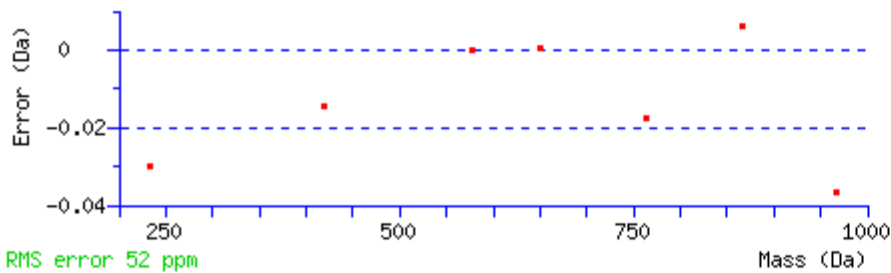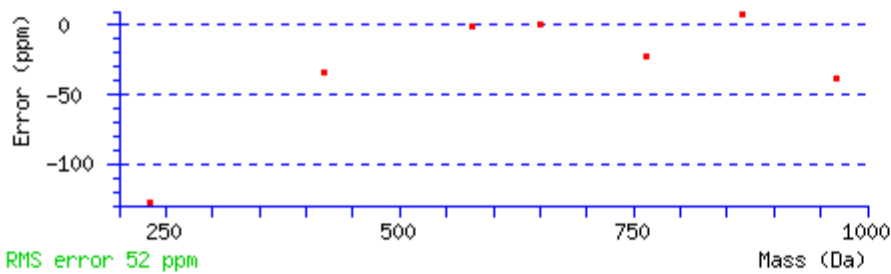

NCBI BLAST search of [ITTDACWGR](#)

(Parameters: blastp, nr protein database, expect=20000, no filter, PAM30)

Other BLAST [web gateways](#)

## All matches to this query

| Score | Mr(calc):   | Delta     | Sequence                   |
|-------|-------------|-----------|----------------------------|
| 60.0  | 1078.486588 | 0.003240  | <a href="#">ITTDACWGR</a>  |
| 4.2   | 1078.493118 | -0.003290 | <a href="#">DVGHLPSEPP</a> |
| 3.9   | 1078.493118 | -0.003290 | <a href="#">DVGHLPSEPP</a> |
| 0.9   | 1078.493118 | -0.003290 | <a href="#">DVGHLPSEPP</a> |



# **MASCOT** Mascot Search Results

## Peptide View

MS/MS Fragmentation of **EPPTDVTPTFLTGTGVLSTLR**

Found in **GUAH\_HUMAN**, GMP synthase [glutamine-hydrolyzing] OS=Homo sapiens GN=GMPS PE=1 SV=1

Match to Query 62782: 2144.135592 from(715.719140,3+) rtinseconds(4037) index(58831)

Title: Locus:1.1.1.2978.18

Data file 2011-11-14 - TFD - EP 7-2.mgf

Click mouse within plot area to zoom in by factor of two about that point

Or, Plot from  to  Da

Label all possible matches  Label matches used for scoring

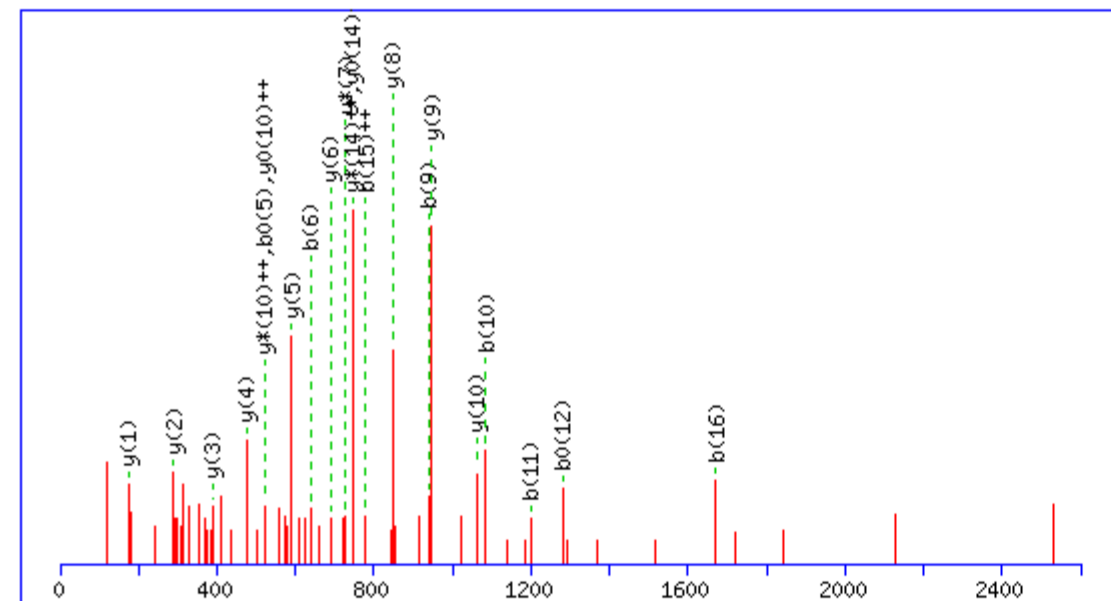

Monoisotopic mass of neutral peptide Mr(calc): 2144.136536

Fixed modifications: Propionamide (C) (apply to specified residues or termini only)

Ions Score: 48 Expect: 4.1e-005

Matches : 23/186 fragment ions using 41 most intense peaks [\(help\)](#)

| #  | b                  | b <sup>++</sup>   | b <sup>0</sup>     | b <sup>0++</sup> | Seq. | y                  | y <sup>++</sup> | y <sup>*</sup>    | y <sup>*++</sup>  | y <sup>0</sup> | y <sup>0++</sup>  | #  |
|----|--------------------|-------------------|--------------------|------------------|------|--------------------|-----------------|-------------------|-------------------|----------------|-------------------|----|
| 1  | 130.049869         | 65.528572         | 112.039304         | 56.523290        | E    |                    |                 |                   |                   |                |                   | 20 |
| 2  | 227.102633         | 114.054954        | 209.092068         | 105.049672       | P    | 2016.101187        | 1008.554232     | 1999.074638       | 1000.040957       | 1998.090622    | 999.548949        | 19 |
| 3  | 324.155397         | 162.581336        | 306.144832         | 153.576054       | P    | 1919.048423        | 960.027850      | 1902.021874       | 951.514575        | 1901.037858    | 951.022567        | 18 |
| 4  | 425.203076         | 213.105176        | 407.192511         | 204.099894       | T    | 1821.995659        | 911.501468      | 1804.969110       | 902.988193        | 1803.985094    | 902.496185        | 17 |
| 5  | 540.230019         | 270.618648        | <b>522.219454</b>  | 261.613365       | D    | 1720.947980        | 860.977628      | 1703.921431       | 852.464354        | 1702.937415    | 851.972346        | 16 |
| 6  | <b>639.298433</b>  | 320.152855        | 621.287868         | 311.147572       | V    | 1605.921037        | 803.464157      | 1588.894488       | 794.950882        | 1587.910472    | 794.458874        | 15 |
| 7  | 740.346112         | 370.676694        | 722.335547         | 361.671412       | T    | 1506.852623        | 753.929950      | 1489.826074       | <b>745.416675</b> | 1488.842058    | <b>744.924667</b> | 14 |
| 8  | 837.398876         | 419.203076        | 819.388311         | 410.197794       | P    | 1405.804944        | 703.406110      | 1388.778395       | 694.892836        | 1387.794379    | 694.400828        | 13 |
| 9  | <b>938.446555</b>  | 469.726916        | 920.435990         | 460.721633       | T    | 1308.752180        | 654.879728      | 1291.725631       | 646.366454        | 1290.741615    | 645.874446        | 12 |
| 10 | <b>1085.514969</b> | 543.261123        | 1067.504404        | 534.255840       | F    | 1207.704501        | 604.355888      | 1190.677952       | 595.842614        | 1189.693936    | 595.350606        | 11 |
| 11 | <b>1198.599033</b> | 599.803155        | 1180.588468        | 590.797872       | L    | <b>1060.636087</b> | 530.821682      | 1043.609538       | <b>522.308407</b> | 1042.625522    | <b>521.816399</b> | 10 |
| 12 | 1299.646712        | 650.326994        | <b>1281.636147</b> | 641.321711       | T    | <b>947.552023</b>  | 474.279650      | 930.525474        | 465.766375        | 929.541458     | 465.274367        | 9  |
| 13 | 1400.694391        | 700.850834        | 1382.683826        | 691.845551       | T    | <b>846.504344</b>  | 423.755810      | 829.477795        | 415.242536        | 828.493779     | 414.750528        | 8  |
| 14 | 1457.715855        | 729.361565        | 1439.705290        | 720.356283       | G    | <b>745.456665</b>  | 373.231971      | <b>728.430116</b> | 364.718696        | 727.446100     | 364.226688        | 7  |
| 15 | 1556.784269        | <b>778.895773</b> | 1538.773704        | 769.890490       | V    | <b>688.435201</b>  | 344.721239      | 671.408652        | 336.207964        | 670.424636     | 335.715956        | 6  |
| 16 | <b>1669.868333</b> | 835.437804        | 1651.857768        | 826.432522       | L    | <b>589.366787</b>  | 295.187032      | 572.340238        | 286.673757        | 571.356222     | 286.181749        | 5  |
| 17 | 1756.900361        | 878.953819        | 1738.889796        | 869.948536       | S    | <b>476.282723</b>  | 238.645000      | 459.256174        | 230.131725        | 458.272158     | 229.639717        | 4  |
| 18 | 1857.948040        | 929.477658        | 1839.937475        | 920.472376       | T    | <b>389.250695</b>  | 195.128986      | 372.224146        | 186.615711        | 371.240130     | 186.123703        | 3  |
| 19 | 1971.032104        | 986.019690        | 1953.021539        | 977.014407       | L    | <b>288.203016</b>  | 144.605146      | 271.176467        | 136.091872        |                |                   | 2  |
| 20 |                    |                   |                    |                  | R    | <b>175.118952</b>  | 88.063114       | 158.092403        | 79.549840         |                |                   | 1  |

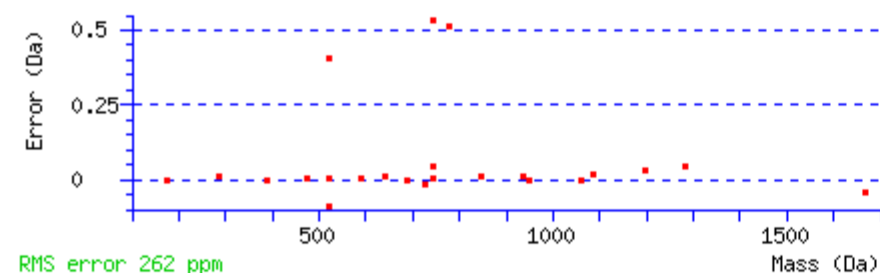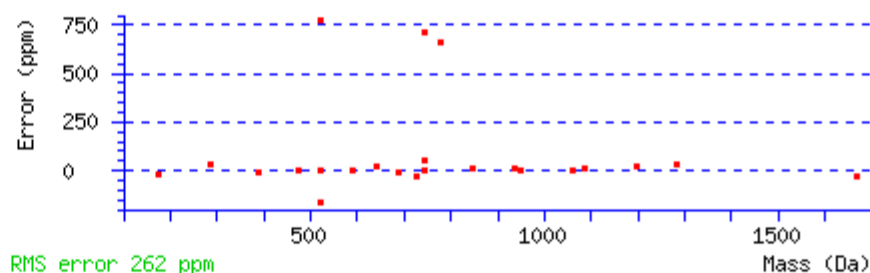

NCBI BLAST search of **EPPTDVTPTFLTGTGVLSTLR**

(Parameters: blastp, nr protein database, expect=20000, no filter, PAM30)

Other BLAST [web gateways](#)

## All matches to this query

| Score | Mr(calc):   | Delta     | Sequence                              |
|-------|-------------|-----------|---------------------------------------|
| 48.0  | 2144.136536 | -0.000944 | <a href="#">EPPTDVTPTFLTGTGVLSTLR</a> |
| 1.3   | 2144.127930 | 0.007662  | <a href="#">LRLQQLPWSSPLHPWDR</a>     |

# MASCOT SEARCH RESULTS

## Peptide View

MS/MS Fragmentation of **SDAPTGDVLLDEALK**

Found in **GOLP3\_HUMAN**, Golgi phosphoprotein 3 OS=Homo sapiens GN=GOLPH3 PE=1 SV=1

Match to Query 48069: 1542.784848 from(772.399700,2+) rtinseconds(3094) index(43667)

Title: Locus:1.1.1.2502.38

Data file 2011-11-10 - TFD - EP 4-4.mgf

Click mouse within plot area to zoom in by factor of two about that point

Or, Plot from  to  Da

Label all possible matches  Label matches used for scoring

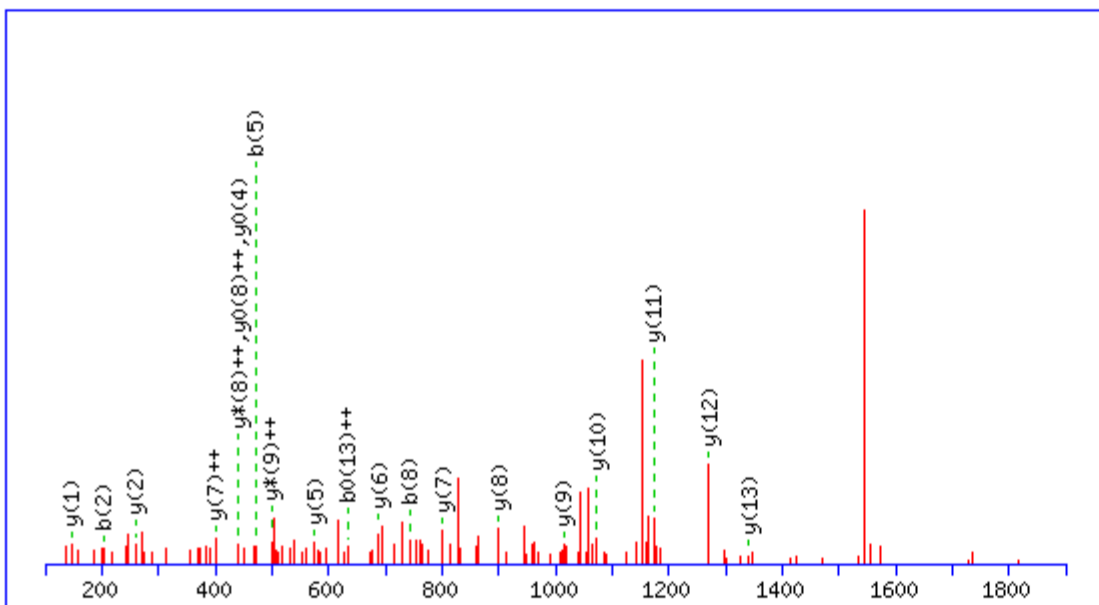

Monoisotopic mass of neutral peptide  $M_r(\text{calc})$ : 1542.777710

Fixed modifications: Propionamide (C) (apply to specified residues or termini only)

Ions Score: 40 Expect: 0.0012

Matches : 20/134 fragment ions using 64 most intense peaks [\(help\)](#)

| #  | b                 | b <sup>++</sup> | b <sup>0</sup> | b <sup>0++</sup>  | Seq. | y                  | y <sup>++</sup>   | y <sup>*</sup> | y <sup>***</sup>  | y <sup>0</sup>    | y <sup>0++</sup>  | #  |
|----|-------------------|-----------------|----------------|-------------------|------|--------------------|-------------------|----------------|-------------------|-------------------|-------------------|----|
| 1  | 88.039304         | 44.523290       | 70.028739      | 35.518008         | S    |                    |                   |                |                   |                   |                   | 15 |
| 2  | <b>203.066247</b> | 102.036761      | 185.055682     | 93.031479         | D    | 1456.752967        | 728.880122        | 1439.726418    | 720.366847        | 1438.742402       | 719.874839        | 14 |
| 3  | 274.103361        | 137.555319      | 256.092796     | 128.550036        | A    | <b>1341.726024</b> | 671.366650        | 1324.699475    | 662.853376        | 1323.715459       | 662.361368        | 13 |
| 4  | 371.156125        | 186.081701      | 353.145560     | 177.076418        | P    | <b>1270.688910</b> | 635.848093        | 1253.662361    | 627.334819        | 1252.678345       | 626.842811        | 12 |
| 5  | <b>472.203804</b> | 236.605540      | 454.193239     | 227.600258        | T    | <b>1173.636146</b> | 587.321711        | 1156.609597    | 578.808437        | 1155.625581       | 578.316429        | 11 |
| 6  | 529.225268        | 265.116272      | 511.214703     | 256.110990        | G    | <b>1072.588467</b> | 536.797872        | 1055.561918    | 528.284597        | 1054.577902       | 527.792589        | 10 |
| 7  | 644.252211        | 322.629744      | 626.241646     | 313.624461        | D    | <b>1015.567003</b> | 508.287140        | 998.540454     | <b>499.773865</b> | 997.556438        | 499.281857        | 9  |
| 8  | <b>743.320625</b> | 372.163951      | 725.310060     | 363.158668        | V    | <b>900.540060</b>  | 450.773668        | 883.513511     | <b>442.260394</b> | 882.529495        | <b>441.768386</b> | 8  |
| 9  | 856.404689        | 428.705983      | 838.394124     | 419.700700        | L    | <b>801.471646</b>  | <b>401.239461</b> | 784.445097     | 392.726187        | 783.461081        | 392.234179        | 7  |
| 10 | 969.488753        | 485.248015      | 951.478188     | 476.242732        | L    | <b>688.387582</b>  | 344.697429        | 671.361033     | 336.184155        | 670.377017        | 335.692147        | 6  |
| 11 | 1084.515696       | 542.761486      | 1066.505131    | 533.756204        | D    | <b>575.303518</b>  | 288.155397        | 558.276969     | 279.642123        | 557.292953        | 279.150115        | 5  |
| 12 | 1213.558289       | 607.282783      | 1195.547724    | 598.277500        | E    | 460.276575         | 230.641925        | 443.250026     | 222.128651        | <b>442.266010</b> | 221.636643        | 4  |
| 13 | 1284.595403       | 642.801340      | 1266.584838    | <b>633.796057</b> | A    | 331.233982         | 166.120629        | 314.207433     | 157.607354        |                   |                   | 3  |
| 14 | 1397.679467       | 699.343372      | 1379.668902    | 690.338089        | L    | <b>260.196868</b>  | 130.602072        | 243.170319     | 122.088797        |                   |                   | 2  |
| 15 |                   |                 |                |                   | K    | <b>147.112804</b>  | 74.060040         | 130.086255     | 65.546765         |                   |                   | 1  |

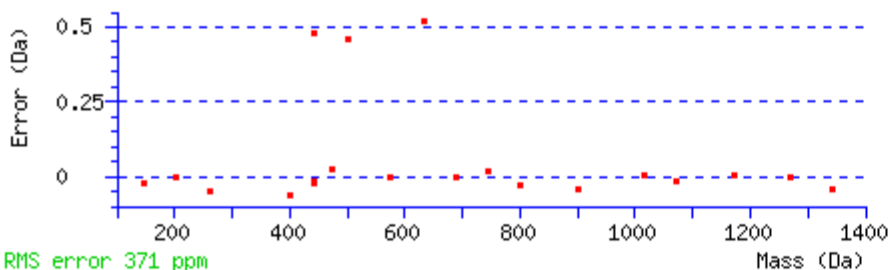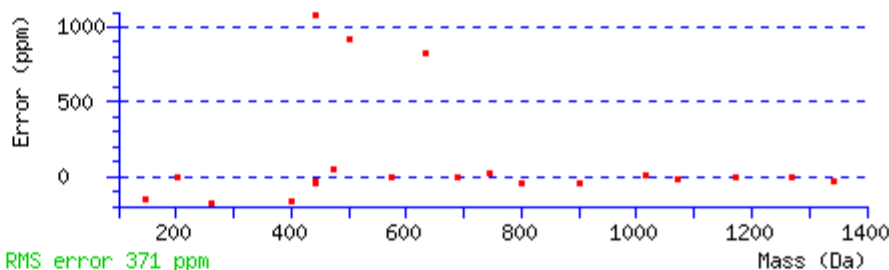

NCBI BLAST search of [SDAPTGDVLLDEALK](#)

(Parameters: blastp, nr protein database, expect=20000, no filter, PAM30)

Other BLAST [web gateways](#)

## All matches to this query

| Score | $M_r(\text{calc})$ : | Delta     | Sequence                         |
|-------|----------------------|-----------|----------------------------------|
| 40.3  | 1542.777710          | 0.007138  | <a href="#">SDAPTGDVLLDEALK</a>  |
| 10.0  | 1542.792938          | -0.008090 | <a href="#">ISEGLPALEFPNEK</a>   |
| 5.8   | 1542.788940          | -0.004092 | <a href="#">NSSTIIQNPVETPK</a>   |
| 3.6   | 1542.771179          | 0.013669  | <a href="#">ATPTPVTPEMERAK</a>   |
| 3.0   | 1542.771225          | 0.013623  | <a href="#">VSSPVMVAQGGGPTPK</a> |
| 2.6   | 1542.788940          | -0.004092 | <a href="#">NSSTIIQNPVETPK</a>   |
| 2.2   | 1542.771179          | 0.013669  | <a href="#">ATPTPVTPEMERAK</a>   |

# MASCOT SCIENCE Mascot Search Results

## Peptide View

MS/MS Fragmentation of **SDSPTGDVLLDETLK**

Found in **GLP3L\_HUMAN**, Golgi phosphoprotein 3-like OS=Homo sapiens GN=GOLPH3L PE=1 SV=1

Match to Query 50552: 1588.791808 from(795.403180,2+) rtinseconds(2882) index(39263)

Title: Locus:1.1.1.2438.44

Data file 2011-11-10 - TFD - EP 3-4.mgf

Click mouse within plot area to zoom in by factor of two about that point

Or, Plot from  to  Da

Label all possible matches  Label matches used for scoring

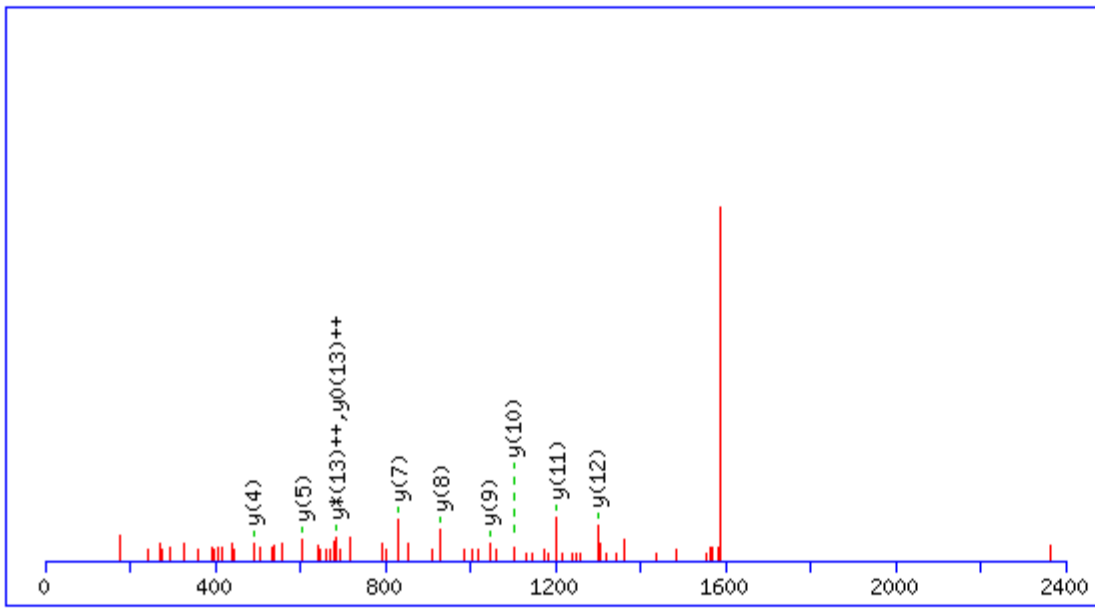

Monoisotopic mass of neutral peptide Mr(calc): 1588.783203

Fixed modifications: Propionamide (C) (apply to specified residues or termini only)

Ions Score: 58 Expect: 2.3e-005

Matches : 10/136 fragment ions using 15 most intense peaks [\(help\)](#)

| #  | b           | b <sup>++</sup> | b <sup>0</sup> | b <sup>0++</sup> | Seq. | y           | y <sup>++</sup> | y <sup>*</sup> | y <sup>*++</sup> | y <sup>0</sup> | y <sup>0++</sup> | #  |
|----|-------------|-----------------|----------------|------------------|------|-------------|-----------------|----------------|------------------|----------------|------------------|----|
| 1  | 88.039304   | 44.523290       | 70.028739      | 35.518008        | S    |             |                 |                |                  |                |                  | 15 |
| 2  | 203.066247  | 102.036761      | 185.055682     | 93.031479        | D    | 1502.758446 | 751.882861      | 1485.731897    | 743.369587       | 1484.747881    | 742.877579       | 14 |
| 3  | 290.098275  | 145.552776      | 272.087710     | 136.547493       | S    | 1387.731503 | 694.369390      | 1370.704954    | 685.856115       | 1369.720938    | 685.364107       | 13 |
| 4  | 387.151039  | 194.079158      | 369.140474     | 185.073875       | P    | 1300.699475 | 650.853376      | 1283.672926    | 642.340101       | 1282.688910    | 641.848093       | 12 |
| 5  | 488.198718  | 244.602997      | 470.188153     | 235.597715       | T    | 1203.646711 | 602.326994      | 1186.620162    | 593.813719       | 1185.636146    | 593.321711       | 11 |
| 6  | 545.220182  | 273.113729      | 527.209617     | 264.108447       | G    | 1102.599032 | 551.803154      | 1085.572483    | 543.289880       | 1084.588467    | 542.797872       | 10 |
| 7  | 660.247125  | 330.627201      | 642.236560     | 321.621918       | D    | 1045.577568 | 523.292422      | 1028.551019    | 514.779148       | 1027.567003    | 514.287139       | 9  |
| 8  | 759.315539  | 380.161408      | 741.304974     | 371.156125       | V    | 930.550625  | 465.778951      | 913.524076     | 457.265676       | 912.540060     | 456.773668       | 8  |
| 9  | 872.399603  | 436.703440      | 854.389038     | 427.698157       | L    | 831.482211  | 416.244744      | 814.455662     | 407.731469       | 813.471646     | 407.239461       | 7  |
| 10 | 985.483667  | 493.245472      | 967.473102     | 484.240189       | L    | 718.398147  | 359.702712      | 701.371598     | 351.189437       | 700.387582     | 350.697429       | 6  |
| 11 | 1100.510610 | 550.758943      | 1082.500045    | 541.753661       | D    | 605.314083  | 303.160680      | 588.287534     | 294.647405       | 587.303518     | 294.155397       | 5  |
| 12 | 1229.553203 | 615.280240      | 1211.542638    | 606.274957       | E    | 490.287140  | 245.647208      | 473.260591     | 237.133934       | 472.276575     | 236.641926       | 4  |
| 13 | 1330.600882 | 665.804079      | 1312.590317    | 656.798797       | T    | 361.244547  | 181.125911      | 344.217998     | 172.612637       | 343.233982     | 172.120629       | 3  |
| 14 | 1443.684946 | 722.346111      | 1425.674381    | 713.340829       | L    | 260.196868  | 130.602072      | 243.170319     | 122.088797       |                |                  | 2  |
| 15 |             |                 |                |                  | K    | 147.112804  | 74.060040       | 130.086255     | 65.546765        |                |                  | 1  |

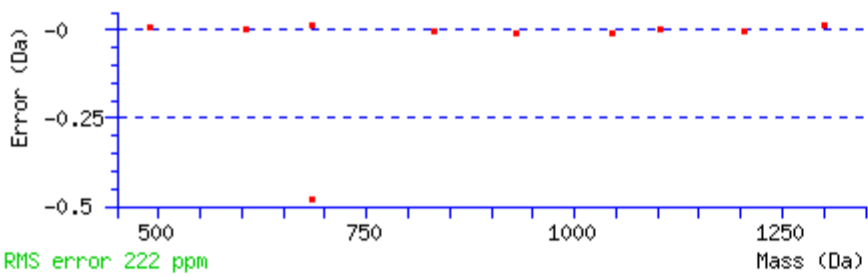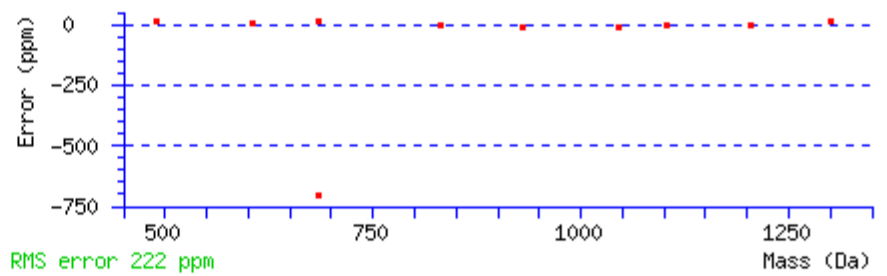

NCBI BLAST search of [SDSPTGDVLLDETLK](#)

(Parameters: blastp, nr protein database, expect=20000, no filter, PAM30)

Other BLAST [web gateways](#)

## All matches to this query

| Score | Mr(calc):   | Delta    | Sequence                        |
|-------|-------------|----------|---------------------------------|
| 57.9  | 1588.783203 | 0.008605 | <a href="#">SDSPTGDVLLDETLK</a> |

Mascot: <http://www.matrixscience.com/>

# **Mascot Search Results**

## Peptide View

MS/MS Fragmentation of **YDVQHLQTALR**

Found in **GOSR2\_HUMAN**, Golgi SNAP receptor complex member 2 OS=Homo sapiens GN=GOSR2 PE=1 SV=2

Match to Query 34047: 1342.698252 from(448.573360,3+) rtinseconds(2183) index(21242)

Title: Locus:1.1.1.2453.6

Data file 2011-11-10 - TFD - EP 3-5.mgf

Click mouse within plot area to zoom in by factor of two about that point

Or, Plot from  to  Da

Label all possible matches  Label matches used for scoring

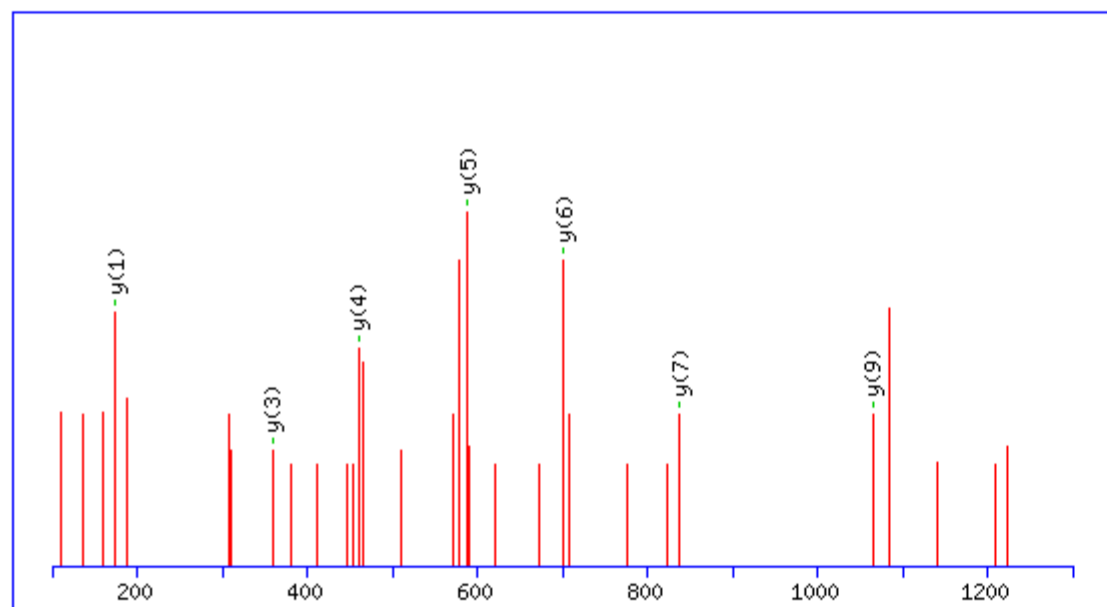

Monoisotopic mass of neutral peptide Mr(calc): 1342.699341

Fixed modifications: Propionamide (C) (apply to specified residues or termini only)

Ions Score: 32 Expect: 0.0013

Matches : 7/106 fragment ions using 20 most intense peaks [\(help\)](#)

| #  | b           | b <sup>++</sup> | b <sup>*</sup> | b <sup>+++</sup> | b <sup>0</sup> | b <sup>0++</sup> | Seq. | y                  | y <sup>++</sup> | y <sup>*</sup> | y <sup>+++</sup> | y <sup>0</sup> | y <sup>0++</sup> | #  |
|----|-------------|-----------------|----------------|------------------|----------------|------------------|------|--------------------|-----------------|----------------|------------------|----------------|------------------|----|
| 1  | 164.070605  | 82.538940       |                |                  |                |                  | Y    |                    |                 |                |                  |                |                  | 11 |
| 2  | 279.097548  | 140.052412      |                |                  | 261.086983     | 131.047130       | D    | 1180.643298        | 590.825287      | 1163.616749    | 582.312013       | 1162.632733    | 581.820004       | 10 |
| 3  | 378.165962  | 189.586619      |                |                  | 360.155397     | 180.581337       | V    | <b>1065.616355</b> | 533.311815      | 1048.589806    | 524.798541       | 1047.605790    | 524.306533       | 9  |
| 4  | 506.224540  | 253.615908      | 489.197991     | 245.102634       | 488.213975     | 244.610626       | Q    | 966.547941         | 483.777609      | 949.521392     | 475.264334       | 948.537376     | 474.772326       | 8  |
| 5  | 643.283452  | 322.145364      | 626.256903     | 313.632090       | 625.272887     | 313.140082       | H    | <b>838.489363</b>  | 419.748319      | 821.462814     | 411.235045       | 820.478798     | 410.743037       | 7  |
| 6  | 756.367516  | 378.687396      | 739.340967     | 370.174122       | 738.356951     | 369.682114       | L    | <b>701.430451</b>  | 351.218864      | 684.403902     | 342.705589       | 683.419886     | 342.213581       | 6  |
| 7  | 884.426094  | 442.716685      | 867.399545     | 434.203411       | 866.415529     | 433.711403       | Q    | <b>588.346387</b>  | 294.676831      | 571.319838     | 286.163557       | 570.335822     | 285.671549       | 5  |
| 8  | 985.473773  | 493.240525      | 968.447224     | 484.727250       | 967.463208     | 484.235242       | T    | <b>460.287809</b>  | 230.647542      | 443.261260     | 222.134268       | 442.277244     | 221.642260       | 4  |
| 9  | 1056.510887 | 528.759082      | 1039.484338    | 520.245807       | 1038.500322    | 519.753799       | A    | <b>359.240130</b>  | 180.123703      | 342.213581     | 171.610428       |                |                  | 3  |
| 10 | 1169.594951 | 585.301114      | 1152.568402    | 576.787839       | 1151.584386    | 576.295831       | L    | 288.203016         | 144.605146      | 271.176467     | 136.091871       |                |                  | 2  |
| 11 |             |                 |                |                  |                |                  | R    | <b>175.118952</b>  | 88.063114       | 158.092403     | 79.549839        |                |                  | 1  |

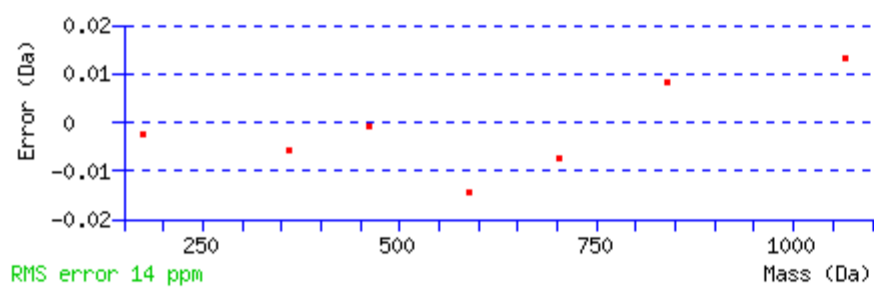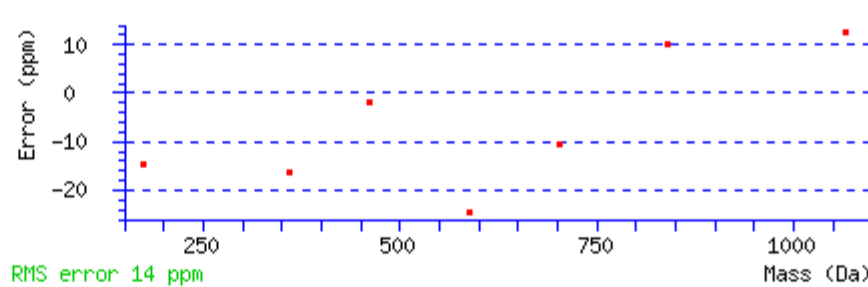

NCBI BLAST search of **YDVQHLQTALR**

(Parameters: blastp, nr protein database, expect=20000, no filter, PAM30)

Other BLAST [web gateways](#)

All matches to this query

| Score | Mr(calc):   | Delta     | Sequence                       |
|-------|-------------|-----------|--------------------------------|
| 32.2  | 1342.699341 | -0.001089 | <a href="#">YDVQHLQTALR</a>    |
| 1.3   | 1342.709229 | -0.010977 | <a href="#">DLEVLEGGAAATLR</a> |

Mascot: <http://www.matrixscience.com/>

**Peptide View**

MS/MS Fragmentation of **AEVEVADELLENLAK**

Found in **GET4\_HUMAN**, Golgi to ER traffic protein 4 homolog OS=Homo sapiens GN=GET4 PE=1 SV=1

Match to Query 53138: 1641.854108 from(821.934330,2+) rtinseconds(3897) index(57768)

Title: Locus:1.1.1.2893.32

Data file 2011-11-12 - TFD - EP 5-4.mgf

Click mouse within plot area to zoom in by factor of two about that point

Or, Plot from  to  Da

Label all possible matches  Label matches used for scoring

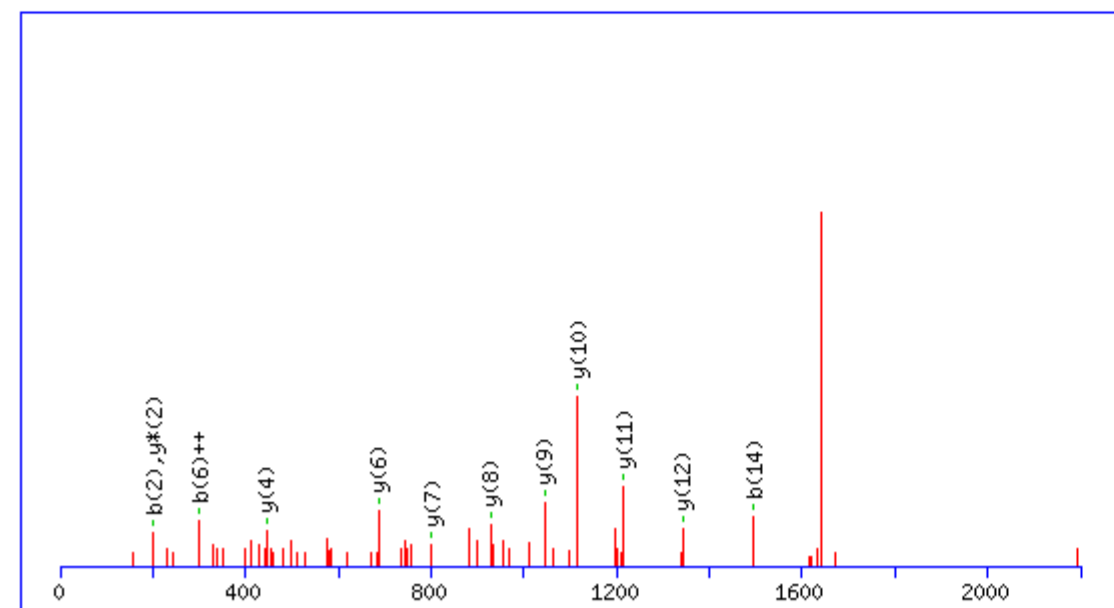

Monoisotopic mass of neutral peptide Mr(calcd): 1641.846085

Fixed modifications: Propionamide (C) (apply to specified residues or termini only)

Ions Score: 67 Expect: 1.2e-006

Matches : 13/136 fragment ions using 14 most intense peaks [\(help\)](#)

| #  | b                  | b <sup>++</sup>   | b <sup>*</sup> | b <sup>*++</sup> | b <sup>0</sup> | b <sup>0++</sup> | Seq. | y                  | y <sup>++</sup> | y <sup>*</sup>    | y <sup>*++</sup> | y <sup>0</sup> | y <sup>0++</sup> | #  |
|----|--------------------|-------------------|----------------|------------------|----------------|------------------|------|--------------------|-----------------|-------------------|------------------|----------------|------------------|----|
| 1  | 72.044390          | 36.525833         |                |                  |                |                  | A    |                    |                 |                   |                  |                |                  | 15 |
| 2  | <b>201.086983</b>  | 101.047130        |                |                  | 183.076418     | 92.041847        | E    | 1571.816294        | 786.411785      | 1554.789745       | 777.898510       | 1553.805729    | 777.406502       | 14 |
| 3  | <b>300.155397</b>  | 150.581336        |                |                  | 282.144832     | 141.576054       | V    | 1442.773701        | 721.890488      | 1425.747152       | 713.377214       | 1424.763136    | 712.885206       | 13 |
| 4  | 429.197990         | 215.102633        |                |                  | 411.187425     | 206.097351       | E    | <b>1343.705287</b> | 672.356281      | 1326.678738       | 663.843007       | 1325.694722    | 663.350999       | 12 |
| 5  | 528.266404         | 264.636840        |                |                  | 510.255839     | 255.631558       | V    | <b>1214.662694</b> | 607.834985      | 1197.636145       | 599.321710       | 1196.652129    | 598.829702       | 11 |
| 6  | 599.303518         | <b>300.155397</b> |                |                  | 581.292953     | 291.150115       | A    | <b>1115.594280</b> | 558.300778      | 1098.567731       | 549.787503       | 1097.583715    | 549.295495       | 10 |
| 7  | 714.330461         | 357.668869        |                |                  | 696.319896     | 348.663586       | D    | <b>1044.557166</b> | 522.782221      | 1027.530617       | 514.268946       | 1026.546601    | 513.776938       | 9  |
| 8  | 843.373054         | 422.190165        |                |                  | 825.362489     | 413.184883       | E    | <b>929.530223</b>  | 465.268749      | 912.503674        | 456.755475       | 911.519658     | 456.263467       | 8  |
| 9  | 956.457118         | 478.732197        |                |                  | 938.446553     | 469.726915       | L    | <b>800.487630</b>  | 400.747453      | 783.461081        | 392.234178       | 782.477065     | 391.742170       | 7  |
| 10 | 1069.541182        | 535.274229        |                |                  | 1051.530617    | 526.268946       | L    | <b>687.403566</b>  | 344.205421      | 670.377017        | 335.692146       | 669.393001     | 335.200138       | 6  |
| 11 | 1198.583775        | 599.795525        |                |                  | 1180.573210    | 590.790243       | E    | 574.319502         | 287.663389      | 557.292953        | 279.150114       | 556.308937     | 278.658106       | 5  |
| 12 | 1312.626702        | 656.816989        | 1295.600153    | 648.303714       | 1294.616137    | 647.811706       | N    | <b>445.276909</b>  | 223.142092      | 428.250360        | 214.628818       |                |                  | 4  |
| 13 | 1425.710766        | 713.359021        | 1408.684217    | 704.845746       | 1407.700201    | 704.353738       | L    | 331.233982         | 166.120629      | 314.207433        | 157.607354       |                |                  | 3  |
| 14 | <b>1496.747880</b> | 748.877578        | 1479.721331    | 740.364303       | 1478.737315    | 739.872295       | A    | 218.149918         | 109.578597      | <b>201.123369</b> | 101.065322       |                |                  | 2  |
| 15 |                    |                   |                |                  |                |                  | K    | 147.112804         | 74.060040       | 130.086255        | 65.546765        |                |                  | 1  |

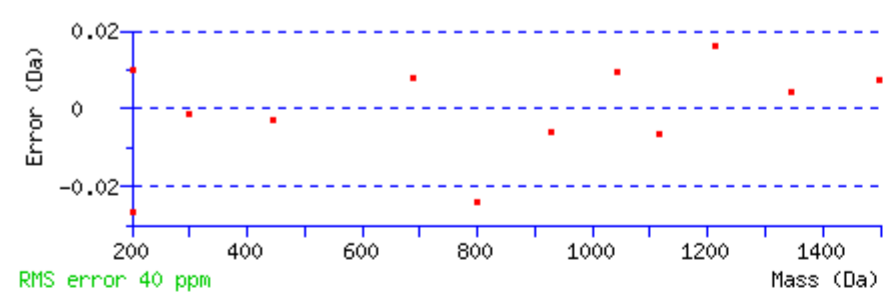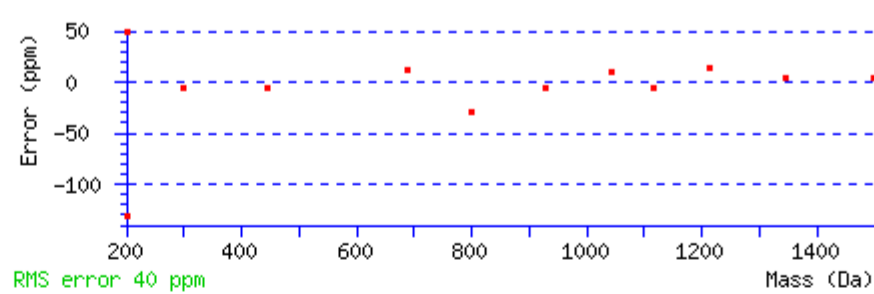

NCBI BLAST search of [AEVEVADELLENLAK](#)

(Parameters: blastp, nr protein database, expect=20000, no filter, PAM30)

Other BLAST [web gateways](#)

All matches to this query

| Score | Mr(calcd):  | Delta     | Sequence                        |
|-------|-------------|-----------|---------------------------------|
| 66.5  | 1641.846085 | 0.008023  | <a href="#">AEVEVADELLENLAK</a> |
| 3.3   | 1641.857346 | -0.003238 | <a href="#">SPALQDLSQPEGLKK</a> |
| 0.4   | 1641.846100 | 0.008008  | <a href="#">ALDIDLKPLADSEK</a>  |

# **MATRIX** SCIENCE Mascot Search Results

## Peptide View

MS/MS Fragmentation of **LEIALEK**

Found in **GOGA1\_HUMAN**, Golgin subfamily A member 1 OS=Homo sapiens GN=GOLGA1 PE=1 SV=3

Match to Query 1212: 814.482148 from(408.248350,2+) rtinseconds(2090) index(24692)

Title: Locus:1.1.1.2114.3

Data file 2011-11-12 - TFD - EP 6-1.mgf

Click mouse within plot area to zoom in by factor of two about that point

Or, Plot from  to  Da

Label all possible matches  Label matches used for scoring

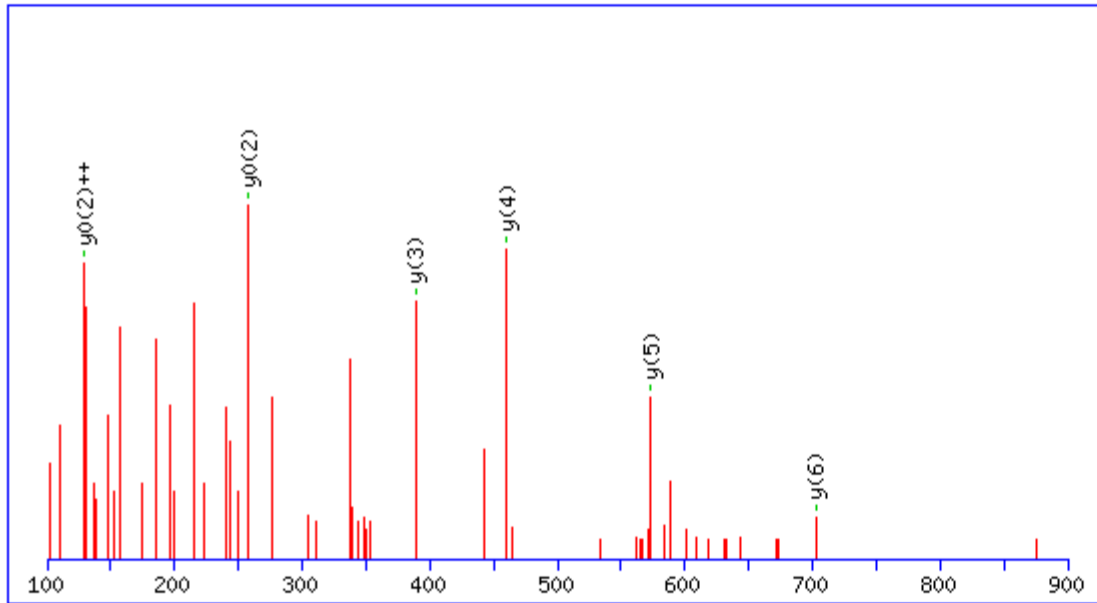

Monoisotopic mass of neutral peptide Mr(calc): 814.479980

Fixed modifications: Propionamide (C) (apply to specified residues or termini only)

Ions Score: 33 Expect: 0.0026

Matches : 6/56 fragment ions using 7 most intense peaks [\(help\)](#)

| # | b          | b <sup>++</sup> | b <sup>0</sup> | b <sup>0++</sup> | Seq. | y                 | y <sup>++</sup> | y <sup>*</sup> | y <sup>*++</sup> | y <sup>0</sup>    | y <sup>0++</sup>  | # |
|---|------------|-----------------|----------------|------------------|------|-------------------|-----------------|----------------|------------------|-------------------|-------------------|---|
| 1 | 114.091340 | 57.549308       |                |                  | L    |                   |                 |                |                  |                   |                   | 7 |
| 2 | 243.133933 | 122.070605      | 225.123368     | 113.065322       | E    | <b>702.403232</b> | 351.705254      | 685.376683     | 343.191980       | 684.392667        | 342.699972        | 6 |
| 3 | 356.217997 | 178.612637      | 338.207432     | 169.607354       | I    | <b>573.360639</b> | 287.183958      | 556.334090     | 278.670683       | 555.350074        | 278.178675        | 5 |
| 4 | 427.255111 | 214.131193      | 409.244546     | 205.125911       | A    | <b>460.276575</b> | 230.641925      | 443.250026     | 222.128651       | 442.266010        | 221.636643        | 4 |
| 5 | 540.339175 | 270.673226      | 522.328610     | 261.667943       | L    | <b>389.239461</b> | 195.123369      | 372.212912     | 186.610094       | 371.228896        | 186.118086        | 3 |
| 6 | 669.381768 | 335.194522      | 651.371203     | 326.189240       | E    | 276.155397        | 138.581336      | 259.128848     | 130.068062       | <b>258.144832</b> | <b>129.576054</b> | 2 |
| 7 |            |                 |                |                  | K    | 147.112804        | 74.060040       | 130.086255     | 65.546765        |                   |                   | 1 |

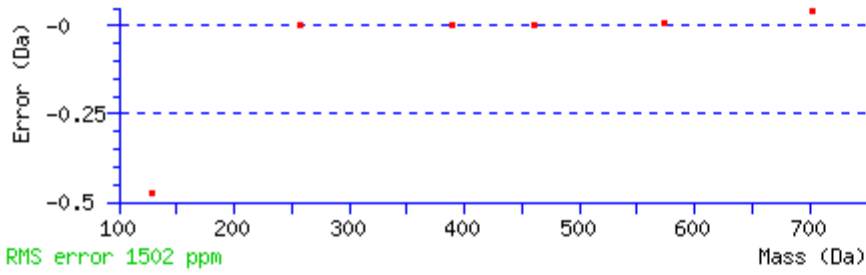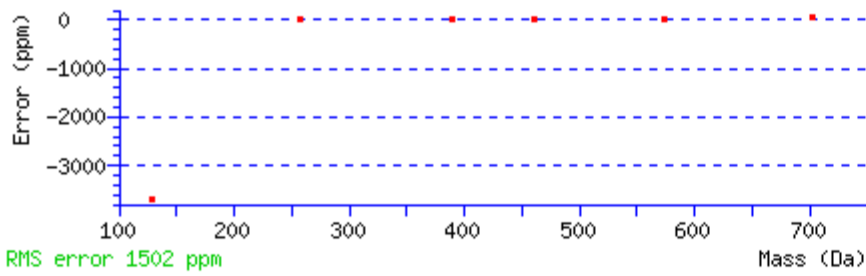

NCBI BLAST search of **LEIALEK**

(Parameters: blastp, nr protein database, expect=20000, no filter, PAM30)

Other BLAST [web gateways](#)

## All matches to this query

| Score | Mr(calc):  | Delta    | Sequence                |
|-------|------------|----------|-------------------------|
| 33.1  | 814.479980 | 0.002168 | <a href="#">LEIALEK</a> |
| 28.2  | 814.479980 | 0.002168 | <a href="#">LIEALEK</a> |
| 19.4  | 814.479980 | 0.002168 | <a href="#">ELLALEK</a> |
| 17.6  | 814.479980 | 0.002168 | <a href="#">LEALLEK</a> |
| 11.2  | 814.479980 | 0.002168 | <a href="#">ELLLAEK</a> |
| 10.3  | 814.480011 | 0.002137 | <a href="#">DVLLEK</a>  |
| 9.0   | 814.479996 | 0.002152 | <a href="#">LEPIISK</a> |
| 8.6   | 814.480011 | 0.002137 | <a href="#">VDLVLEK</a> |
| 7.4   | 814.479980 | 0.002168 | <a href="#">IILEAEK</a> |
| 7.4   | 814.480011 | 0.002137 | <a href="#">ILVDVEK</a> |

# MASCOT Search Results

## Peptide View

MS/MS Fragmentation of **CPDGSTCCCLPSGK**

Found in **GRN\_HUMAN**, Granulins OS=Homo sapiens GN=GRN PE=1 SV=2

Match to Query 887303: 1566.611448 from(784.313000,2+) rtinseconds(1385) index(251100)

Title: Locus:1.1.1.971.44

Data file C:\Program Files (x86)\Matrix Science\Mascot Daemon\mgf\3 TFD - Epitel - R2\mascot\_daemon\_merge.mgf

Click mouse within plot area to zoom in by factor of two about that point

Or, Plot from  to  Da

Label all possible matches  Label matches used for scoring

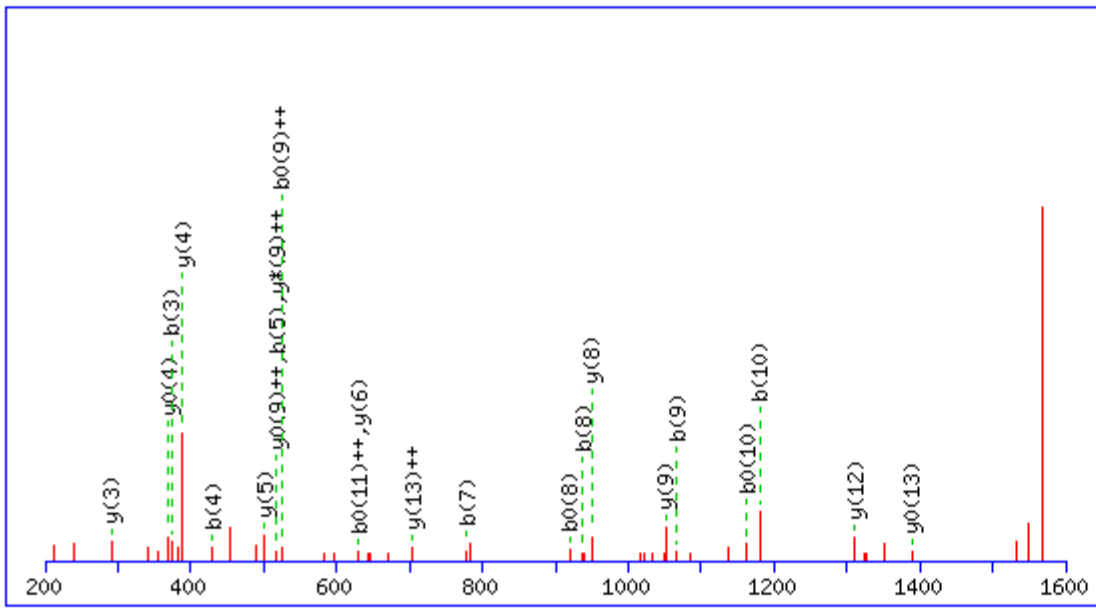

Monoisotopic mass of neutral peptide Mr(calc): 1566.611282

Fixed modifications: Carbamidomethyl (C) (apply to specified residues or termini only)

Ions Score: 47 Expect: 2.9e-005

Matches : 23/122 fragment ions using 39 most intense peaks [\(help\)](#)

| #  | b           | b <sup>++</sup> | b <sup>0</sup> | b <sup>0++</sup> | Seq. | y           | y <sup>++</sup> | y <sup>*</sup> | y <sup>*++</sup> | y <sup>0</sup> | y <sup>0++</sup> | #  |
|----|-------------|-----------------|----------------|------------------|------|-------------|-----------------|----------------|------------------|----------------|------------------|----|
| 1  | 161.037925  | 81.022600       |                |                  | C    |             |                 |                |                  |                |                  | 14 |
| 2  | 258.090689  | 129.548982      |                |                  | P    | 1407.587893 | 704.297585      | 1390.561344    | 695.784310       | 1389.577328    | 695.292302       | 13 |
| 3  | 373.117632  | 187.062454      | 355.107067     | 178.057172       | D    | 1310.535129 | 655.771203      | 1293.508580    | 647.257928       | 1292.524564    | 646.765920       | 12 |
| 4  | 430.139096  | 215.573186      | 412.128531     | 206.567904       | G    | 1195.508186 | 598.257731      | 1178.481637    | 589.744457       | 1177.497621    | 589.252449       | 11 |
| 5  | 517.171124  | 259.089200      | 499.160559     | 250.083918       | S    | 1138.486722 | 569.746999      | 1121.460173    | 561.233725       | 1120.476157    | 560.741717       | 10 |
| 6  | 618.218803  | 309.613040      | 600.208238     | 300.607757       | T    | 1051.454694 | 526.230985      | 1034.428145    | 517.717711       | 1033.444129    | 517.225703       | 9  |
| 7  | 778.249452  | 389.628364      | 760.238887     | 380.623082       | C    | 950.407015  | 475.707146      | 933.380466     | 467.193871       | 932.396450     | 466.701863       | 8  |
| 8  | 938.280101  | 469.643689      | 920.269536     | 460.638406       | C    | 790.376366  | 395.691821      | 773.349817     | 387.178547       | 772.365801     | 386.686539       | 7  |
| 9  | 1067.322694 | 534.164985      | 1049.312129    | 525.159703       | E    | 630.345717  | 315.676497      | 613.319168     | 307.163222       | 612.335152     | 306.671214       | 6  |
| 10 | 1180.406758 | 590.707017      | 1162.396193    | 581.701735       | L    | 501.303124  | 251.155200      | 484.276575     | 242.641925       | 483.292559     | 242.149917       | 5  |
| 11 | 1277.459522 | 639.233399      | 1259.448957    | 630.228117       | P    | 388.219060  | 194.613168      | 371.192511     | 186.099894       | 370.208495     | 185.607886       | 4  |
| 12 | 1364.491550 | 682.749413      | 1346.480985    | 673.744131       | S    | 291.166296  | 146.086786      | 274.139747     | 137.573512       | 273.155731     | 137.081504       | 3  |
| 13 | 1421.513014 | 711.260145      | 1403.502449    | 702.254863       | G    | 204.134268  | 102.570772      | 187.107719     | 94.057497        |                |                  | 2  |
| 14 |             |                 |                |                  | K    | 147.112804  | 74.060040       | 130.086255     | 65.546765        |                |                  | 1  |

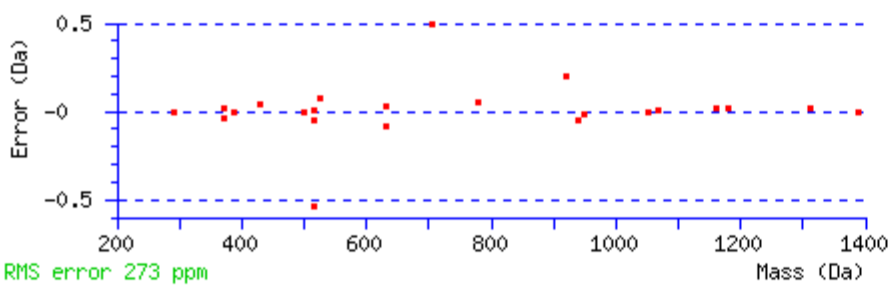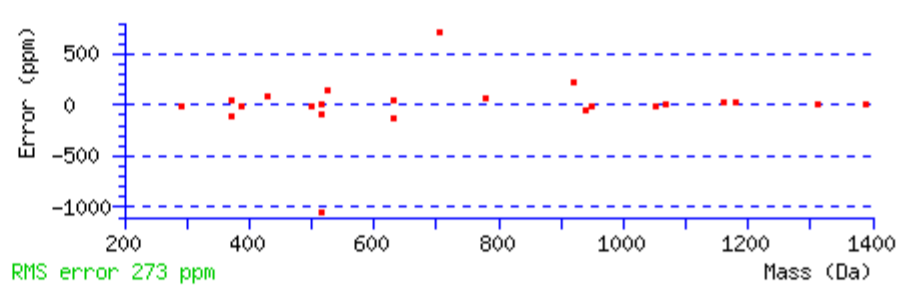

NCBI BLAST search of **CPDGSTCCCLPSGK**

(Parameters: blastp, nr protein database, expect=20000, no filter, PAM30)

Other BLAST [web gateways](#)

All matches to this query

| Score | Mr(calc):   | Delta     | Sequence                       |
|-------|-------------|-----------|--------------------------------|
| 46.7  | 1566.611282 | 0.000166  | <a href="#">CPDGSTCCCLPSGK</a> |
| 0.2   | 1566.612610 | -0.001162 | <a href="#">CVQASNCPCYHR</a>   |

Mascot: <http://www.matrixscience.com/>

# MASCOT Search Results

## Peptide View

MS/MS Fragmentation of **SQHKEELGAVR**

Found in **GRAP1\_HUMAN**, GRIP1-associated protein 1 OS=Homo sapiens GN=GRIPAP1 PE=1 SV=1

Match to Query 586243: 1252.652742 from(418.558190,3+) rtinseconds(831) index(817382)

Title: Locus:1.1.1.859.4

Data file C:\Program Files (x86)\Matrix Science\Mascot Daemon\mgf3 TFD - Epitel - R2\mascot\_daemon\_merge.mgf

Click mouse within plot area to zoom in by factor of two about that point

Or, Plot from  to  Da

Label all possible matches  Label matches used for scoring

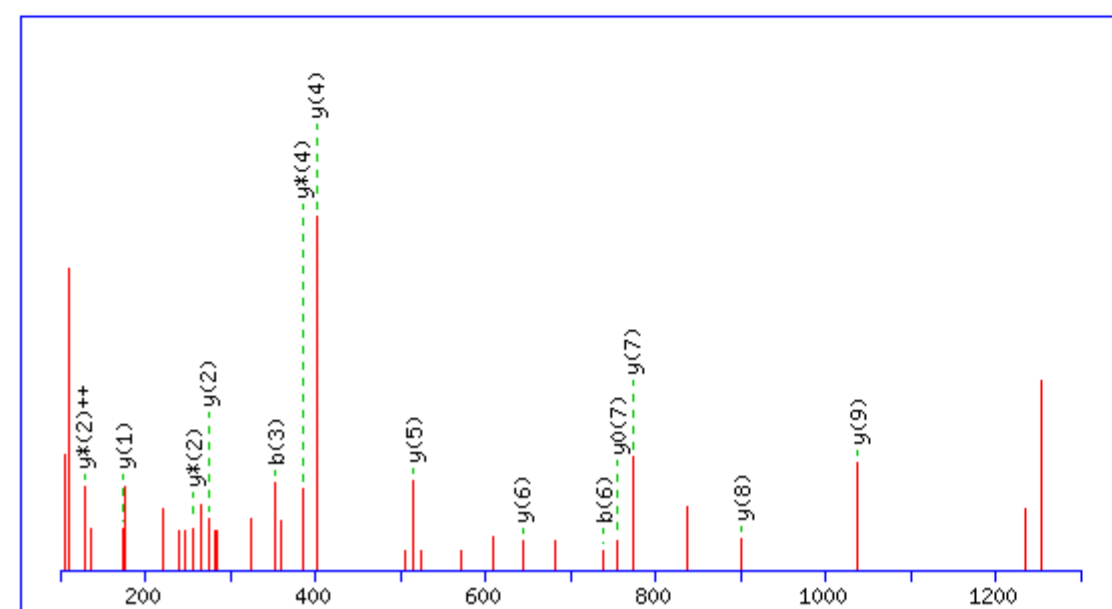

Monoisotopic mass of neutral peptide  $M_r(\text{calc})$ : 1252.652374

Fixed modifications: Carbamidomethyl (C) (apply to specified residues or termini only)

Ions Score: 48 Expect: 0.00018

Matches : 14/108 fragment ions using 32 most intense peaks ([help](#))

| #  | b                 | b <sup>++</sup> | b <sup>*</sup> | b <sup>*++</sup> | b <sup>0</sup> | b <sup>0++</sup> | Seq. | y                  | y <sup>++</sup> | y <sup>*</sup>    | y <sup>*++</sup>  | y <sup>0</sup>    | y <sup>0++</sup> | #  |
|----|-------------------|-----------------|----------------|------------------|----------------|------------------|------|--------------------|-----------------|-------------------|-------------------|-------------------|------------------|----|
| 1  | 88.039304         | 44.523290       |                |                  | 70.028739      | 35.518008        | S    |                    |                 |                   |                   |                   |                  | 11 |
| 2  | 216.097882        | 108.552579      | 199.071333     | 100.039305       | 198.087317     | 99.547296        | Q    | 1166.627647        | 583.817462      | 1149.601098       | 575.304187        | 1148.617082       | 574.812179       | 10 |
| 3  | <b>353.156794</b> | 177.082035      | 336.130245     | 168.568761       | 335.146229     | 168.076753       | H    | <b>1038.569069</b> | 519.788173      | 1021.542520       | 511.274898        | 1020.558504       | 510.782890       | 9  |
| 4  | 481.251757        | 241.129516      | 464.225208     | 232.616242       | 463.241192     | 232.124234       | K    | <b>901.510157</b>  | 451.258717      | 884.483608        | 442.745442        | 883.499592        | 442.253434       | 8  |
| 5  | 610.294350        | 305.650813      | 593.267801     | 297.137539       | 592.283785     | 296.645531       | E    | <b>773.415194</b>  | 387.211235      | 756.388645        | 378.697961        | <b>755.404629</b> | 378.205953       | 7  |
| 6  | <b>739.336943</b> | 370.172110      | 722.310394     | 361.658835       | 721.326378     | 361.166827       | E    | <b>644.372601</b>  | 322.689939      | 627.346052        | 314.176664        | 626.362036        | 313.684656       | 6  |
| 7  | 852.421007        | 426.714142      | 835.394458     | 418.200867       | 834.410442     | 417.708859       | L    | <b>515.330008</b>  | 258.168642      | 498.303459        | 249.655368        |                   |                  | 5  |
| 8  | 909.442471        | 455.224874      | 892.415922     | 446.711599       | 891.431906     | 446.219591       | G    | <b>402.245944</b>  | 201.626610      | <b>385.219395</b> | 193.113335        |                   |                  | 4  |
| 9  | 980.479585        | 490.743431      | 963.453036     | 482.230156       | 962.469020     | 481.738148       | A    | 345.224480         | 173.115878      | 328.197931        | 164.602603        |                   |                  | 3  |
| 10 | 1079.547999       | 540.277638      | 1062.521450    | 531.764363       | 1061.537434    | 531.272355       | V    | <b>274.187366</b>  | 137.597321      | <b>257.160817</b> | <b>129.084046</b> |                   |                  | 2  |
| 11 |                   |                 |                |                  |                |                  | R    | <b>175.118952</b>  | 88.063114       | 158.092403        | 79.549839         |                   |                  | 1  |

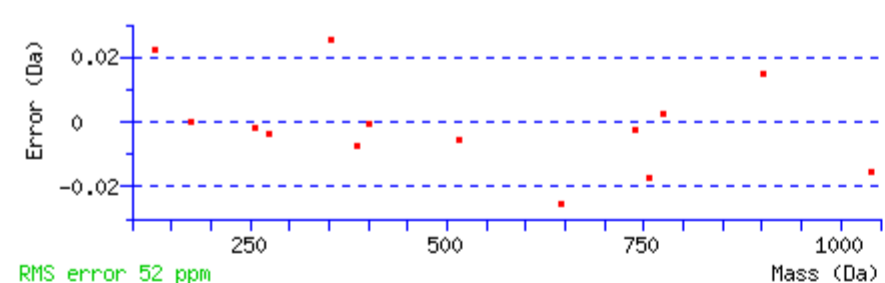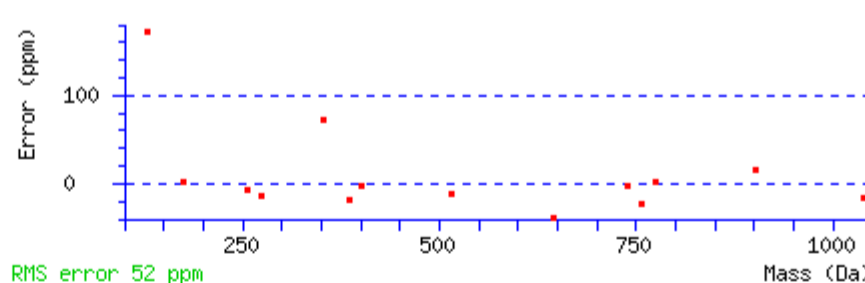

NCBI BLAST search of [SQHKEELGAVR](#)

(Parameters: blastp, nr protein database, expect=20000, no filter, PAM30)

Other BLAST [web gateways](#)

## All matches to this query

| Score | $M_r(\text{calc})$ : | Delta    | Sequence                     |
|-------|----------------------|----------|------------------------------|
| 48.4  | 1252.652374          | 0.000368 | <a href="#">SQHKEELGAVR</a>  |
| 8.2   | 1252.652374          | 0.000368 | <a href="#">LSPESAPGPARR</a> |
| 6.7   | 1252.641205          | 0.011537 | <a href="#">VGVTGPPDPQVR</a> |
| 6.7   | 1252.641205          | 0.011537 | <a href="#">VGVTGPPDPQVR</a> |
| 5.6   | 1252.652390          | 0.000352 | <a href="#">RPEIGGELGGPR</a> |
| 2.4   | 1252.648560          | 0.004182 | <a href="#">MAVDGTLVYIR</a>  |
| 0.7   | 1252.652390          | 0.000352 | <a href="#">AAPPQIPDTRR</a>  |

Mascot: <http://www.matrixscience.com/>



# MASCOT SEARCH RESULTS

## Peptide View

MS/MS Fragmentation of **SIPYDQSPGPK**

Found in **GHITM\_HUMAN**, Growth hormone-inducible transmembrane protein OS=Homo sapiens GN=GHITM PE=1 SV=2

Match to Query 504363: 1187.584168 from(594.799360,2+) rtinseconds(1546) index(338723)

Title: Locus:1.1.1.926.32

Data file C:\Program Files (x86)\Matrix Science\Mascot Daemon\mgf3 TFD - Epitel - R2\mascot\_daemon\_merge.mgf

Click mouse within plot area to zoom in by factor of two about that point

Or, Plot from  to  Da

Label all possible matches  Label matches used for scoring

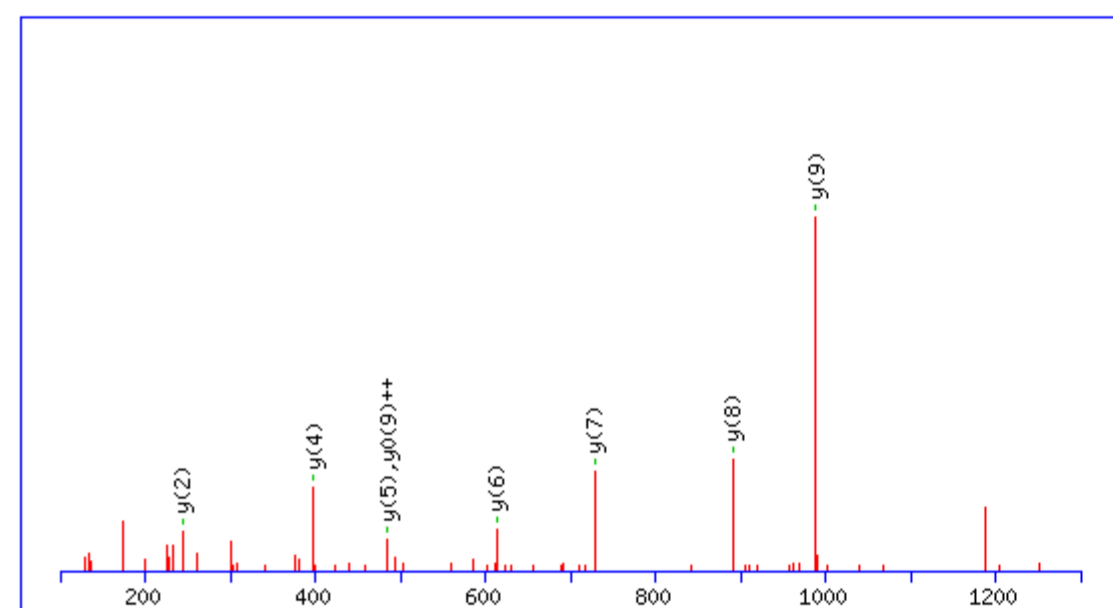

Monoisotopic mass of neutral peptide Mr(calc): 1187.582245

Fixed modifications: Carbamidomethyl (C) (apply to specified residues or termini only)

Ions Score: 65 Expect: 2.7e-006

Matches : 8/102 fragment ions using 9 most intense peaks [\(help\)](#)

| #  | b           | b <sup>++</sup> | b <sup>+</sup> | b <sup>+++</sup> | b <sup>0</sup> | b <sup>0++</sup> | Seq. | y                 | y <sup>++</sup> | y <sup>+</sup> | y <sup>+++</sup> | y <sup>0</sup> | y <sup>0++</sup>  | #  |
|----|-------------|-----------------|----------------|------------------|----------------|------------------|------|-------------------|-----------------|----------------|------------------|----------------|-------------------|----|
| 1  | 88.039304   | 44.523290       |                |                  | 70.028739      | 35.518008        | S    |                   |                 |                |                  |                |                   | 11 |
| 2  | 201.123368  | 101.065322      |                |                  | 183.112803     | 92.060039        | I    | 1101.557502       | 551.282389      | 1084.530953    | 542.769115       | 1083.546937    | 542.277107        | 10 |
| 3  | 298.176132  | 149.591704      |                |                  | 280.165567     | 140.586422       | P    | <b>988.473438</b> | 494.740357      | 971.446889     | 486.227083       | 970.462873     | <b>485.735075</b> | 9  |
| 4  | 461.239461  | 231.123369      |                |                  | 443.228896     | 222.118086       | Y    | <b>891.420674</b> | 446.213975      | 874.394125     | 437.700701       | 873.410109     | 437.208693        | 8  |
| 5  | 576.266404  | 288.636840      |                |                  | 558.255839     | 279.631558       | D    | <b>728.357345</b> | 364.682311      | 711.330796     | 356.169036       | 710.346780     | 355.677028        | 7  |
| 6  | 704.324982  | 352.666129      | 687.298433     | 344.152855       | 686.314417     | 343.660847       | Q    | <b>613.330402</b> | 307.168839      | 596.303853     | 298.655565       | 595.319837     | 298.163557        | 6  |
| 7  | 791.357010  | 396.182143      | 774.330461     | 387.668869       | 773.346445     | 387.176861       | S    | <b>485.271824</b> | 243.139550      | 468.245275     | 234.626276       | 467.261259     | 234.134268        | 5  |
| 8  | 888.409774  | 444.708525      | 871.383225     | 436.195251       | 870.399209     | 435.703243       | P    | <b>398.239796</b> | 199.623536      | 381.213247     | 191.110262       |                |                   | 4  |
| 9  | 945.431238  | 473.219257      | 928.404689     | 464.705983       | 927.420673     | 464.213975       | G    | 301.187032        | 151.097154      | 284.160483     | 142.583880       |                |                   | 3  |
| 10 | 1042.484002 | 521.745639      | 1025.457453    | 513.232365       | 1024.473437    | 512.740357       | P    | <b>244.165568</b> | 122.586422      | 227.139019     | 114.073148       |                |                   | 2  |
| 11 |             |                 |                |                  |                |                  | K    | 147.112804        | 74.060040       | 130.086255     | 65.546765        |                |                   | 1  |

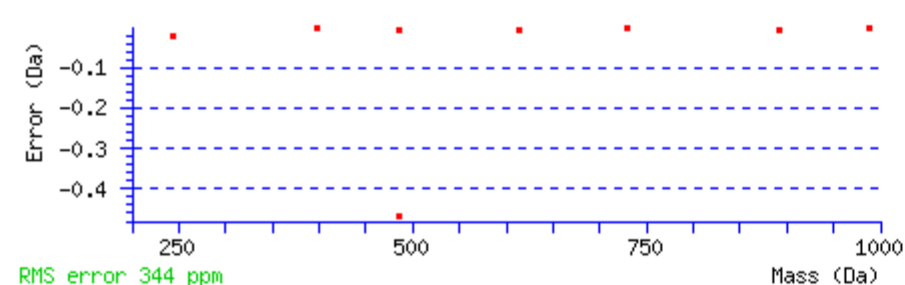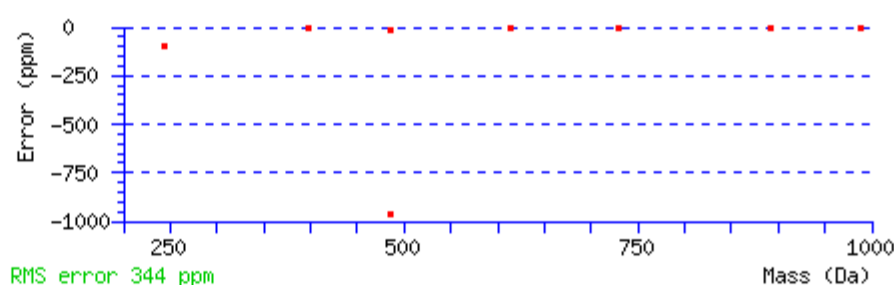

NCBI BLAST search of [SIPYDQSPGPK](#)

(Parameters: blastp, nr protein database, expect=20000, no filter, PAM30)

Other BLAST [web gateways](#)

## All matches to this query

| Score | Mr(calc):   | Delta     | Sequence                     |
|-------|-------------|-----------|------------------------------|
| 65.0  | 1187.582245 | 0.001923  | <a href="#">SIPYDQSPGPK</a>  |
| 5.3   | 1187.578217 | 0.005951  | <a href="#">GGPGLSKNGEEK</a> |
| 2.4   | 1187.574371 | 0.009797  | <a href="#">EALMPPLEQL</a>   |
| 1.8   | 1187.593475 | -0.009307 | <a href="#">SPQRFPEPK</a>    |
| 1.6   | 1187.589462 | -0.005294 | <a href="#">DGARSDPVSLR</a>  |
| 0.9   | 1187.586975 | -0.002807 | <a href="#">VTMGWPRPGR</a>   |
| 0.6   | 1187.578201 | 0.005967  | <a href="#">PSDANLNSINK</a>  |

Mascot: <http://www.matrixscience.com/>

# MASCOT SEARCH RESULTS

## Peptide View

MS/MS Fragmentation of **EAFGNALLQR**

Found in **GSKIP\_HUMAN**, GSK3-beta interaction protein OS=Homo sapiens GN=GSKIP PE=1 SV=2

Match to Query 29375: 1117.581768 from(559.798160,2+) rtinseconds(2461) index(29624)

Title: Locus:1.1.1.2194.28

Data file 2011-11-10 - TFD - EP 4-6.mgf

Click mouse within plot area to zoom in by factor of two about that point

Or, Plot from  to  Da

Label all possible matches  Label matches used for scoring

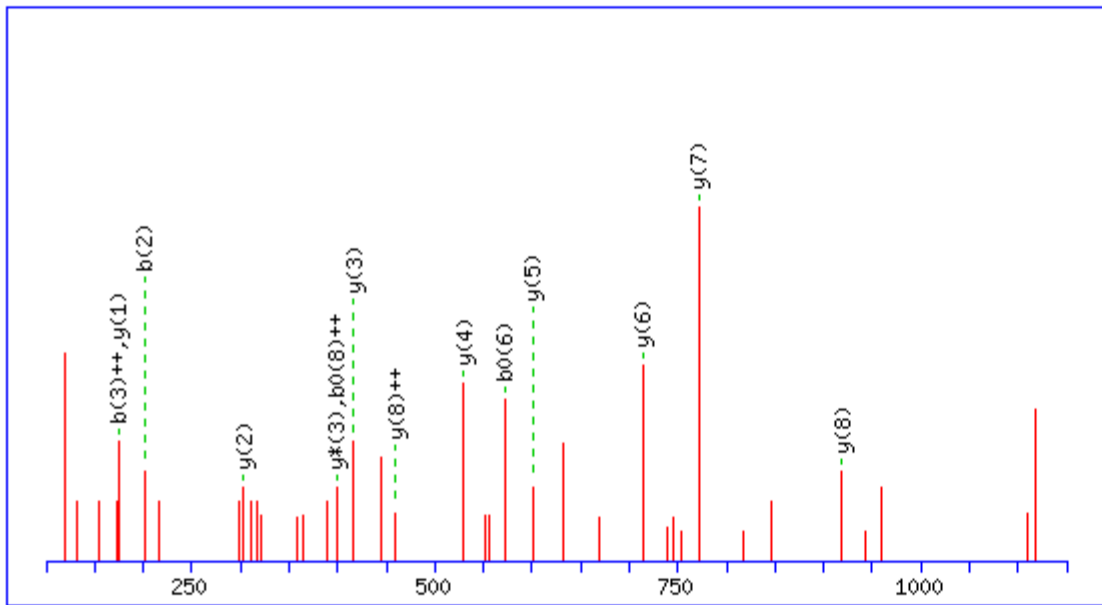

Monoisotopic mass of neutral peptide Mr(calc): 1117.587982

Fixed modifications: Propionamide (C) (apply to specified residues or termini only)

Ions Score: 44 Expect: 0.00047

Matches : 14/82 fragment ions using 25 most intense peaks ([help](#))

| #  | b          | b <sup>++</sup> | b <sup>*</sup> | b <sup>*++</sup> | b <sup>0</sup> | b <sup>0++</sup> | Seq. | y          | y <sup>++</sup> | y <sup>*</sup> | y <sup>*++</sup> | #  |
|----|------------|-----------------|----------------|------------------|----------------|------------------|------|------------|-----------------|----------------|------------------|----|
| 1  | 130.049869 | 65.528572       |                |                  | 112.039304     | 56.523290        | E    |            |                 |                |                  | 10 |
| 2  | 201.086983 | 101.047130      |                |                  | 183.076418     | 92.041847        | A    | 989.552691 | 495.279984      | 972.526142     | 486.766709       | 9  |
| 3  | 348.155397 | 174.581336      |                |                  | 330.144832     | 165.576054       | F    | 918.515577 | 459.761427      | 901.489028     | 451.248152       | 8  |
| 4  | 405.176861 | 203.092068      |                |                  | 387.166296     | 194.086786       | G    | 771.447163 | 386.227220      | 754.420614     | 377.713945       | 7  |
| 5  | 519.219788 | 260.113532      | 502.193239     | 251.600258       | 501.209223     | 251.108250       | N    | 714.425699 | 357.716488      | 697.399150     | 349.203213       | 6  |
| 6  | 590.256902 | 295.632089      | 573.230353     | 287.118814       | 572.246337     | 286.626806       | A    | 600.382772 | 300.695024      | 583.356223     | 292.181750       | 5  |
| 7  | 703.340966 | 352.174121      | 686.314417     | 343.660846       | 685.330401     | 343.168838       | L    | 529.345658 | 265.176467      | 512.319109     | 256.663193       | 4  |
| 8  | 816.425030 | 408.716153      | 799.398481     | 400.202879       | 798.414465     | 399.710871       | L    | 416.261594 | 208.634435      | 399.235045     | 200.121160       | 3  |
| 9  | 944.483608 | 472.745442      | 927.457059     | 464.232168       | 926.473043     | 463.740160       | Q    | 303.177530 | 152.092403      | 286.150981     | 143.579128       | 2  |
| 10 |            |                 |                |                  |                |                  | R    | 175.118952 | 88.063114       | 158.092403     | 79.549839        | 1  |

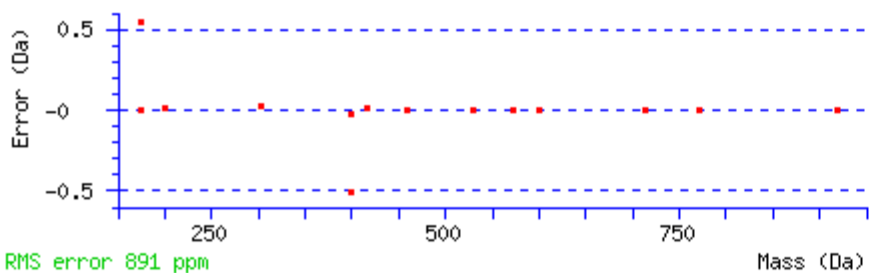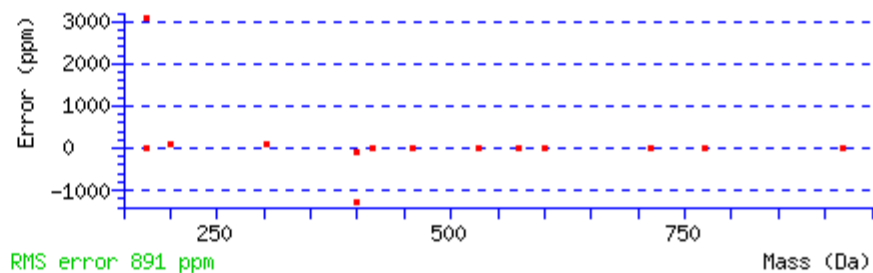

NCBI BLAST search of **EAFGNALLQR**

(Parameters: blastp, nr protein database, expect=20000, no filter, PAM30)

Other BLAST [web gateways](#)

All matches to this query

| Score | Mr(calc):   | Delta     | Sequence                    |
|-------|-------------|-----------|-----------------------------|
| 44.5  | 1117.587982 | -0.006214 | <a href="#">EAFGNALLQR</a>  |
| 18.0  | 1117.588013 | -0.006245 | <a href="#">GTWSTGLPKR</a>  |
| 14.2  | 1117.576767 | 0.005001  | <a href="#">SADTLWGIQK</a>  |
| 10.6  | 1117.572708 | 0.009060  | <a href="#">SAEAELOSKR</a>  |
| 7.4   | 1117.591354 | -0.009586 | <a href="#">DACQTLLKR</a>   |
| 6.9   | 1117.583954 | -0.002186 | <a href="#">SSAQNGSALKR</a> |
| 4.4   | 1117.591354 | -0.009586 | <a href="#">KCIQAVETR</a>   |
| 3.2   | 1117.572739 | 0.009029  | <a href="#">NDGVETIKSR</a>  |
| 0.1   | 1117.591354 | -0.009586 | <a href="#">VAKDMAAAAVR</a> |

Mascot: <http://www.matrixscience.com/>

# MASCOT SEARCH RESULTS

## Peptide View

MS/MS Fragmentation of **LVLVSPTSEQYDSSLR**  
 Found in **GTPBI\_HUMAN**, GTP-binding protein 1 OS=Homo sapiens GN=GTPBP1 PE=1 SV=3

Match to Query 58416: 1818.975012 from(607.332280,3+) rtinseconds(3287) index(45824)  
 Title: Locus:1.1.1.2736.15  
 Data file 2011-11-10 - TFD - EP 4-2.mgf

Click mouse within plot area to zoom in by factor of two about that point  
 Or, Plot from  to  Da   
 Label all possible matches  Label matches used for scoring

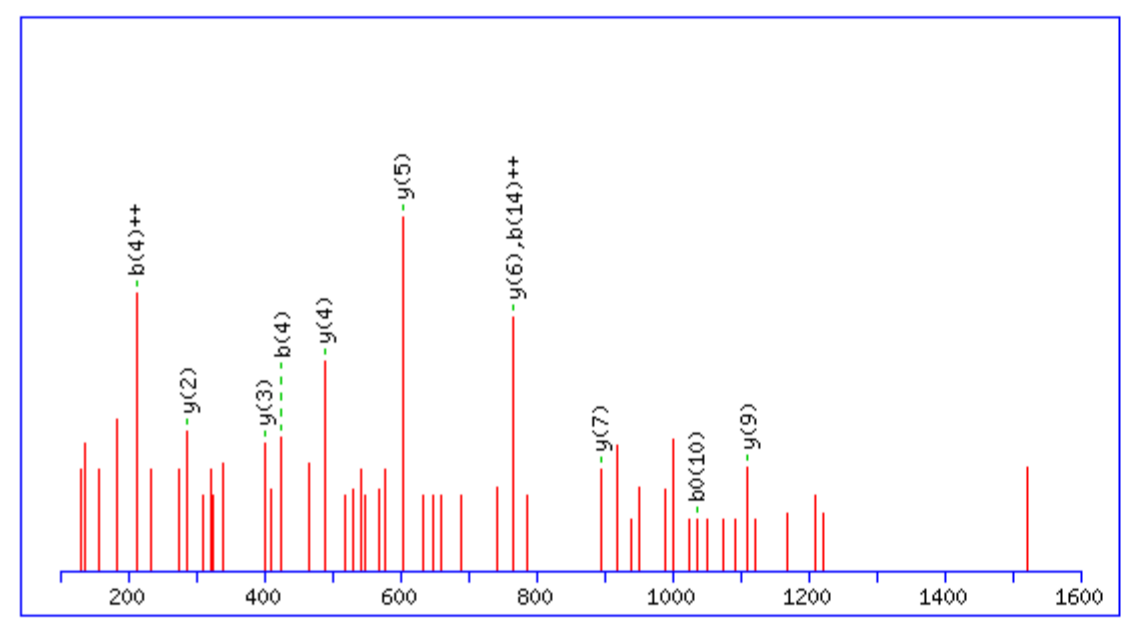

Monoisotopic mass of neutral peptide Mr(calc): 1818.972717  
 Fixed modifications: Propionamide (C) (apply to specified residues or termini only)  
 Ions Score: 31 Expect: 0.0017  
 Matches : 12/148 fragment ions using 23 most intense peaks [\(help\)](#)

| #  | b                 | b <sup>++</sup>   | b <sup>*</sup> | b <sup>*++</sup> | b <sup>0</sup>     | b <sup>0++</sup> | Seq. | y                  | y <sup>++</sup> | y <sup>*</sup> | y <sup>*++</sup> | y <sup>0</sup> | y <sup>0++</sup> | #  |
|----|-------------------|-------------------|----------------|------------------|--------------------|------------------|------|--------------------|-----------------|----------------|------------------|----------------|------------------|----|
| 1  | 114.091340        | 57.549308         |                |                  |                    |                  | L    |                    |                 |                |                  |                |                  | 16 |
| 2  | <b>213.159754</b> | 107.083515        |                |                  |                    |                  | V    | 1706.895942        | 853.951609      | 1689.869393    | 845.438335       | 1688.885377    | 844.946327       | 15 |
| 3  | 326.243818        | 163.625547        |                |                  |                    |                  | L    | 1607.827528        | 804.417402      | 1590.800979    | 795.904128       | 1589.816963    | 795.412120       | 14 |
| 4  | <b>425.312232</b> | <b>213.159754</b> |                |                  |                    |                  | V    | 1494.743464        | 747.875370      | 1477.716915    | 739.362096       | 1476.732899    | 738.870088       | 13 |
| 5  | 512.344260        | 256.675768        |                |                  | 494.333695         | 247.670486       | S    | 1395.675050        | 698.341163      | 1378.648501    | 689.827889       | 1377.664485    | 689.335881       | 12 |
| 6  | 609.397024        | 305.202150        |                |                  | 591.386459         | 296.196868       | P    | 1308.643022        | 654.825149      | 1291.616473    | 646.311875       | 1290.632457    | 645.819867       | 11 |
| 7  | 710.444703        | 355.725990        |                |                  | 692.434138         | 346.720707       | T    | 1211.590258        | 606.298767      | 1194.563709    | 597.785493       | 1193.579693    | 597.293485       | 10 |
| 8  | 797.476731        | 399.242004        |                |                  | 779.466166         | 390.236721       | S    | <b>1110.542579</b> | 555.774928      | 1093.516030    | 547.261653       | 1092.532014    | 546.769645       | 9  |
| 9  | 926.519324        | 463.763300        |                |                  | 908.508759         | 454.758018       | E    | 1023.510551        | 512.258914      | 1006.484002    | 503.745639       | 1005.499986    | 503.253631       | 8  |
| 10 | 1054.577902       | 527.792589        | 1037.551353    | 519.279315       | <b>1036.567337</b> | 518.787307       | Q    | <b>894.467958</b>  | 447.737617      | 877.441409     | 439.224343       | 876.457393     | 438.732335       | 7  |
| 11 | 1217.641231       | 609.324254        | 1200.614682    | 600.810979       | 1199.630666        | 600.318971       | Y    | <b>766.409380</b>  | 383.708328      | 749.382831     | 375.195054       | 748.398815     | 374.703046       | 6  |
| 12 | 1332.668174       | 666.837725        | 1315.641625    | 658.324451       | 1314.657609        | 657.832443       | D    | <b>603.346051</b>  | 302.176664      | 586.319502     | 293.663389       | 585.335486     | 293.171381       | 5  |
| 13 | 1419.700202       | 710.353739        | 1402.673653    | 701.840465       | 1401.689637        | 701.348457       | S    | <b>488.319108</b>  | 244.663192      | 471.292559     | 236.149917       | 470.308543     | 235.657909       | 4  |
| 14 | 1532.784266       | <b>766.895771</b> | 1515.757717    | 758.382497       | 1514.773701        | 757.890489       | L    | <b>401.287080</b>  | 201.147178      | 384.260531     | 192.633903       |                |                  | 3  |
| 15 | 1645.868330       | 823.437803        | 1628.841781    | 814.924529       | 1627.857765        | 814.432521       | L    | <b>288.203016</b>  | 144.605146      | 271.176467     | 136.091871       |                |                  | 2  |
| 16 |                   |                   |                |                  |                    |                  | R    | 175.118952         | 88.063114       | 158.092403     | 79.549839        |                |                  | 1  |

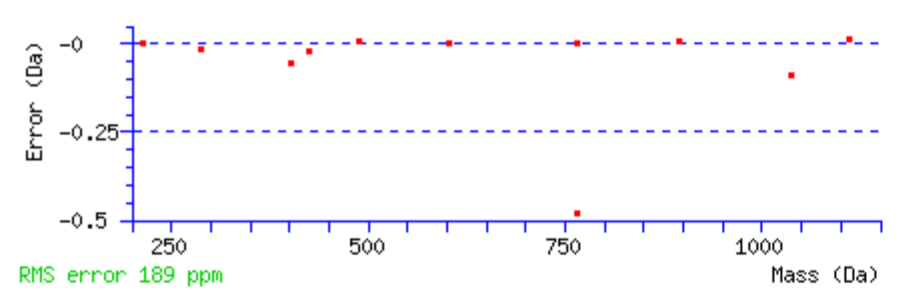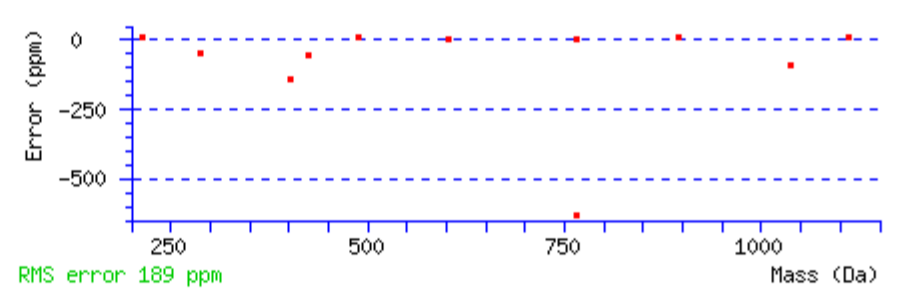

NCBI BLAST search of **LVLVSPTSEQYDSSLR**  
 (Parameters: blastp, nr protein database, expect=20000, no filter, PAM30)  
 Other BLAST [web gateways](#)

### All matches to this query

| Score | Mr(calc):   | Delta     | Sequence                           |
|-------|-------------|-----------|------------------------------------|
| 31.4  | 1818.972717 | 0.002295  | <a href="#">LVLVSPTSEQYDSSLR</a>   |
| 1.8   | 1818.976074 | -0.001062 | <a href="#">TEGLSVLSQAMAVIKEK</a>  |
| 0.6   | 1818.963684 | 0.011328  | <a href="#">LQKMGPFQPMNIFLR</a>    |
| 0.5   | 1818.983948 | -0.008936 | <a href="#">NALGPGLSPELGPLPALR</a> |

# **MASCOT** Mascot Search Results

## Peptide View

MS/MS Fragmentation of **ENQTAVDVFR**

Found in **RHEB\_HUMAN**, GTP-binding protein Rheb OS=Homo sapiens GN=RHEB PE=1 SV=1

Match to Query 33590: 1177.580268 from(589.797410,2+) rtinseconds(2113) index(22979)

Title: Locus:1.1.1.2061.32

Data file 2011-11-10 - TFD - EP 4-6.mgf

Click mouse within plot area to zoom in by factor of two about that point

Or, Plot from  to  Da

Label all possible matches  Label matches used for scoring

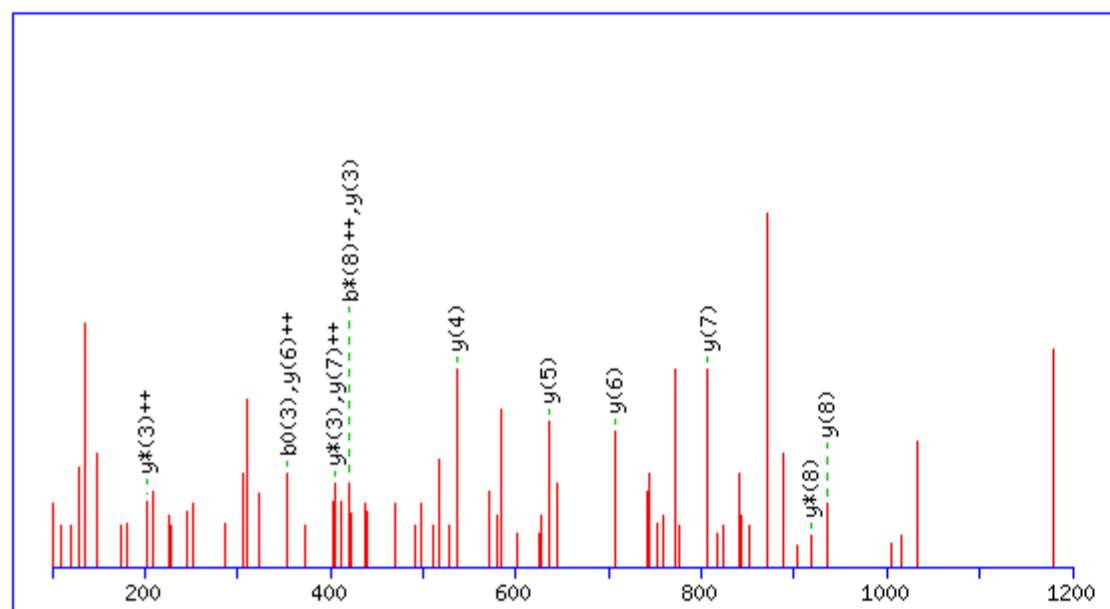

Monoisotopic mass of neutral peptide Mr(calc): 1177.572754

Fixed modifications: Propionamide (C) (apply to specified residues or termini only)

Ions Score: 31 Expect: 0.0031

Matches : 13/100 fragment ions using 20 most intense peaks [\(help\)](#)

| #  | b           | b <sup>++</sup> | b <sup>*</sup> | b <sup>*++</sup> | b <sup>0</sup> | b <sup>0++</sup> | Seq. | y           | y <sup>++</sup> | y <sup>*</sup> | y <sup>*++</sup> | y <sup>0</sup> | y <sup>0++</sup> | #  |
|----|-------------|-----------------|----------------|------------------|----------------|------------------|------|-------------|-----------------|----------------|------------------|----------------|------------------|----|
| 1  | 130.049869  | 65.528572       |                |                  | 112.039304     | 56.523290        | E    |             |                 |                |                  |                |                  | 10 |
| 2  | 244.092796  | 122.550036      | 227.066247     | 114.036762       | 226.082231     | 113.544754       | N    | 1049.537435 | 525.272356      | 1032.510886    | 516.759081       | 1031.526870    | 516.267073       | 9  |
| 3  | 372.151374  | 186.579325      | 355.124825     | 178.066051       | 354.140809     | 177.574043       | Q    | 935.494508  | 468.250892      | 918.467959     | 459.737618       | 917.483943     | 459.245610       | 8  |
| 4  | 473.199053  | 237.103165      | 456.172504     | 228.589890       | 455.188488     | 228.097882       | T    | 807.435930  | 404.221603      | 790.409381     | 395.708329       | 789.425365     | 395.216321       | 7  |
| 5  | 544.236167  | 272.621722      | 527.209618     | 264.108447       | 526.225602     | 263.616439       | A    | 706.388251  | 353.697764      | 689.361702     | 345.184489       | 688.377686     | 344.692481       | 6  |
| 6  | 643.304581  | 322.155929      | 626.278032     | 313.642654       | 625.294016     | 313.150646       | V    | 635.351137  | 318.179207      | 618.324588     | 309.665932       | 617.340572     | 309.173924       | 5  |
| 7  | 758.331524  | 379.669400      | 741.304975     | 371.156126       | 740.320959     | 370.664118       | D    | 536.282723  | 268.645000      | 519.256174     | 260.131725       | 518.272158     | 259.639717       | 4  |
| 8  | 857.399938  | 429.203607      | 840.373389     | 420.690333       | 839.389373     | 420.198325       | V    | 421.255780  | 211.131528      | 404.229231     | 202.618253       |                |                  | 3  |
| 9  | 1004.468352 | 502.737814      | 987.441803     | 494.224539       | 986.457787     | 493.732531       | F    | 322.187366  | 161.597321      | 305.160817     | 153.084047       |                |                  | 2  |
| 10 |             |                 |                |                  |                |                  | R    | 175.118952  | 88.063114       | 158.092403     | 79.549840        |                |                  | 1  |

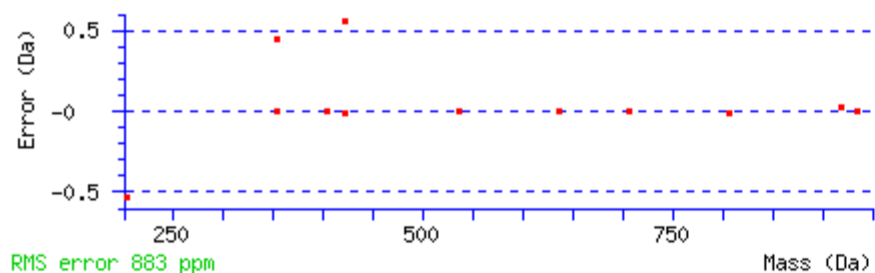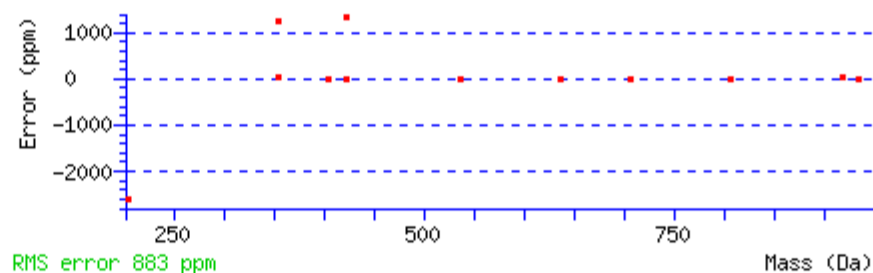

NCBI BLAST search of [ENQTAVDVFR](#)

(Parameters: blastp, nr protein database, expect=20000, no filter, PAM30)

Other BLAST [web gateways](#)

## All matches to this query

| Score | Mr(calc):   | Delta     | Sequence                    |
|-------|-------------|-----------|-----------------------------|
| 31.2  | 1177.572754 | 0.007514  | <a href="#">ENQTAVDVFR</a>  |
| 4.3   | 1177.583481 | -0.003213 | <a href="#">EMEVKCKPK</a>   |
| 0.5   | 1177.583969 | -0.003701 | <a href="#">YGLSPAGRGER</a> |

Mascot: <http://www.matrixscience.com/>

# **MASCOT** Mascot Search Results

## Peptide View

MS/MS Fragmentation of **VLQPGTALFSR**

Found in **MSS4\_HUMAN**, Guanine nucleotide exchange factor MSS4 OS=Homo sapiens GN=RABIF PE=1 SV=2

Match to Query 25909: 1187.662148 from(594.838350,2+) rtinseconds(2604) index(27560)

Title: Locus:1.1.1.2401.19

Data file 2011-11-10 - TFD - EP 3-7.mgf

Click mouse within plot area to zoom in by factor of two about that point

Or, Plot from  to  Da

Label all possible matches  Label matches used for scoring

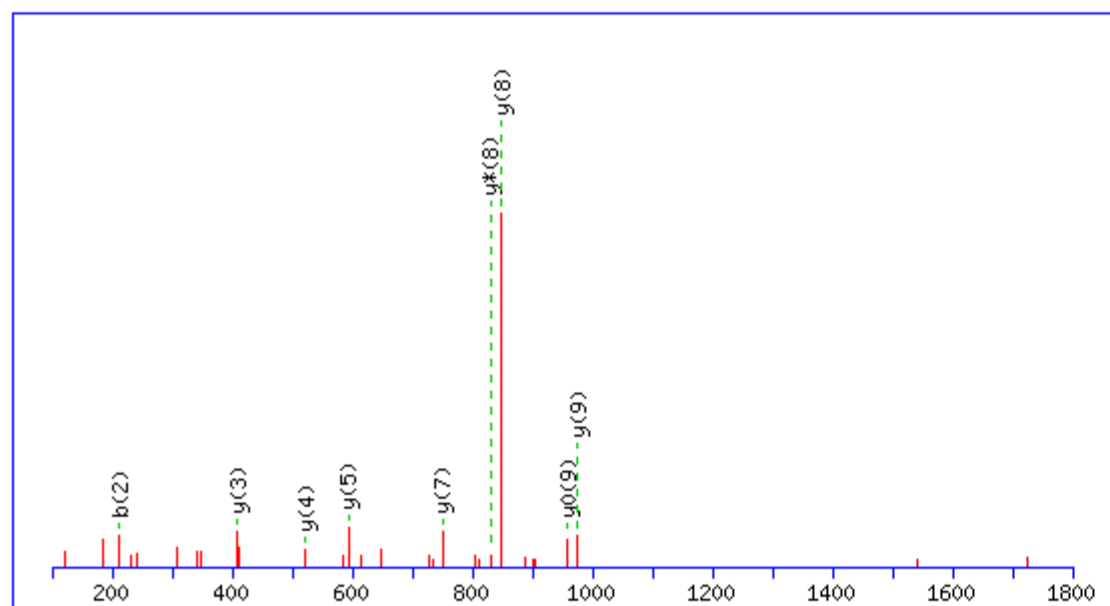

Monoisotopic mass of neutral peptide Mr(calc): 1187.666260

Fixed modifications: Propionamide (C) (apply to specified residues or termini only)

Ions Score: 40 Expect: 0.0011

Matches : 9/104 fragment ions using 15 most intense peaks ([help](#))

| #  | b                 | b <sup>++</sup> | b <sup>*</sup> | b <sup>+++</sup> | b <sup>0</sup> | b <sup>0++</sup> | Seq. | y                 | y <sup>++</sup> | y <sup>*</sup>    | y <sup>+++</sup> | y <sup>0</sup>    | y <sup>0++</sup> | #  |
|----|-------------------|-----------------|----------------|------------------|----------------|------------------|------|-------------------|-----------------|-------------------|------------------|-------------------|------------------|----|
| 1  | 100.075690        | 50.541483       |                |                  |                |                  | V    |                   |                 |                   |                  |                   |                  | 11 |
| 2  | <b>213.159754</b> | 107.083515      |                |                  |                |                  | L    | 1089.605121       | 545.306198      | 1072.578572       | 536.792924       | 1071.594556       | 536.300916       | 10 |
| 3  | 341.218332        | 171.112804      | 324.191783     | 162.599529       |                |                  | Q    | <b>976.521057</b> | 488.764166      | 959.494508        | 480.250892       | <b>958.510492</b> | 479.758884       | 9  |
| 4  | 438.271096        | 219.639186      | 421.244547     | 211.125912       |                |                  | P    | <b>848.462479</b> | 424.734877      | <b>831.435930</b> | 416.221603       | 830.451914        | 415.729595       | 8  |
| 5  | 495.292560        | 248.149918      | 478.266011     | 239.636643       |                |                  | G    | <b>751.409715</b> | 376.208495      | 734.383166        | 367.695221       | 733.399150        | 367.203213       | 7  |
| 6  | 596.340239        | 298.673758      | 579.313690     | 290.160483       | 578.329674     | 289.668475       | T    | 694.388251        | 347.697763      | 677.361702        | 339.184489       | 676.377686        | 338.692481       | 6  |
| 7  | 667.377353        | 334.192315      | 650.350804     | 325.679040       | 649.366788     | 325.187032       | A    | <b>593.340572</b> | 297.173924      | 576.314023        | 288.660649       | 575.330007        | 288.168641       | 5  |
| 8  | 780.461417        | 390.734347      | 763.434868     | 382.221072       | 762.450852     | 381.729064       | L    | <b>522.303458</b> | 261.655367      | 505.276909        | 253.142092       | 504.292893        | 252.650084       | 4  |
| 9  | 927.529831        | 464.268554      | 910.503282     | 455.755279       | 909.519266     | 455.263271       | F    | <b>409.219394</b> | 205.113335      | 392.192845        | 196.600060       | 391.208829        | 196.108052       | 3  |
| 10 | 1014.561859       | 507.784567      | 997.535310     | 499.271293       | 996.551294     | 498.779285       | S    | 262.150980        | 131.579128      | 245.124431        | 123.065853       | 244.140415        | 122.573845       | 2  |
| 11 |                   |                 |                |                  |                |                  | R    | 175.118952        | 88.063114       | 158.092403        | 79.549839        |                   |                  | 1  |

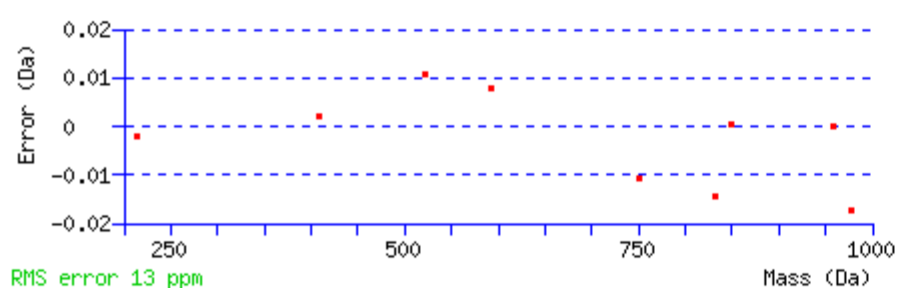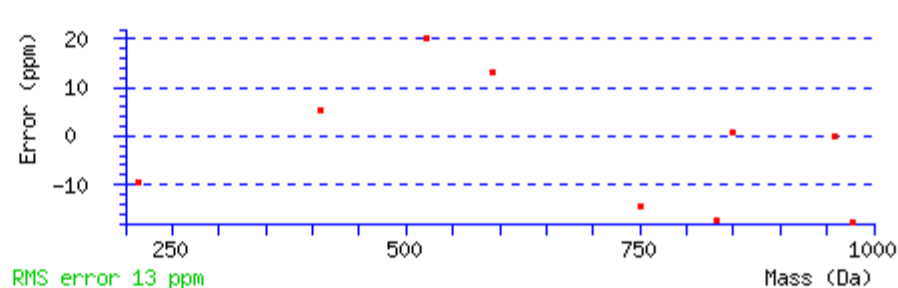

NCBI BLAST search of **VLQPGTALFSR**

(Parameters: blastp, nr protein database, expect=20000, no filter, PAM30)

Other BLAST [web gateways](#)

All matches to this query

| Score | Mr(calc):   | Delta     | Sequence                    |
|-------|-------------|-----------|-----------------------------|
| 40.0  | 1187.666260 | -0.004112 | <a href="#">VLQPGTALFSR</a> |

Mascot: <http://www.matrixscience.com/>

# MASCOT Search Results

## Peptide View

MS/MS Fragmentation of **NSELDPFDFLDVR**

Found in **VAV2\_HUMAN**, Guanine nucleotide exchange factor VAV2 OS=Homo sapiens GN=VAV2 PE=1 SV=2

Match to Query 55744: 1712.808128 from(857.411340,2+) rtinseconds(4728) index(69953)

Title: Locus:1.1.1.3171.12

Data file 2011-11-12 - TFD - EP 6-2.mgf

Click mouse within plot area to zoom in by factor of two about that point

Or, Plot from  to  Da

Label all possible matches  Label matches used for scoring

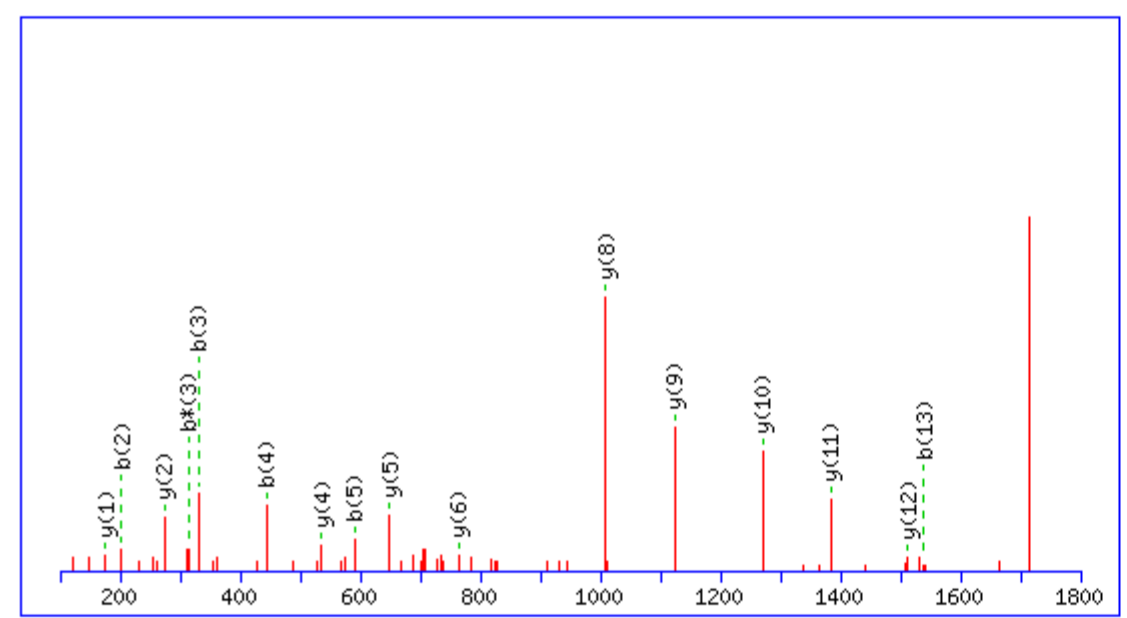

Monoisotopic mass of neutral peptide Mr(calc): 1712.804611

Fixed modifications: Propionamide (C) (apply to specified residues or termini only)

Ions Score: 71 Expect: 6e-007

Matches: 16/150 fragment ions using 27 most intense peaks ([help](#))

| #  | b                  | b <sup>++</sup> | b*                | b <sup>+++</sup> | b <sup>0</sup> | b <sup>0++</sup> | Seq. | y                  | y <sup>++</sup> | y*          | y <sup>+++</sup> | y <sup>0</sup> | y <sup>0++</sup> | #  |
|----|--------------------|-----------------|-------------------|------------------|----------------|------------------|------|--------------------|-----------------|-------------|------------------|----------------|------------------|----|
| 1  | 115.050203         | 58.028740       | 98.023654         | 49.515465        |                |                  | N    |                    |                 |             |                  |                |                  | 14 |
| 2  | <b>202.082231</b>  | 101.544753      | 185.055682        | 93.031479        | 184.071666     | 92.539471        | S    | 1599.768950        | 800.388113      | 1582.742401 | 791.874839       | 1581.758385    | 791.382831       | 13 |
| 3  | <b>331.124824</b>  | 166.066050      | <b>314.098275</b> | 157.552776       | 313.114259     | 157.060768       | E    | <b>1512.736922</b> | 756.872099      | 1495.710373 | 748.358825       | 1494.726357    | 747.866817       | 12 |
| 4  | <b>444.208888</b>  | 222.608082      | 427.182339        | 214.094808       | 426.198323     | 213.602800       | L    | <b>1383.694329</b> | 692.350803      | 1366.667780 | 683.837528       | 1365.683764    | 683.345520       | 11 |
| 5  | <b>591.277302</b>  | 296.142289      | 574.250753        | 287.629015       | 573.266737     | 287.137007       | F    | <b>1270.610265</b> | 635.808771      | 1253.583716 | 627.295496       | 1252.599700    | 626.803488       | 10 |
| 6  | 706.304245         | 353.655761      | 689.277696        | 345.142486       | 688.293680     | 344.650478       | D    | <b>1123.541851</b> | 562.274564      | 1106.515302 | 553.761289       | 1105.531286    | 553.269281       | 9  |
| 7  | 803.357009         | 402.182143      | 786.330460        | 393.668868       | 785.346444     | 393.176860       | P    | <b>1008.514908</b> | 504.761092      | 991.488359  | 496.247818       | 990.504343     | 495.755810       | 8  |
| 8  | 950.425423         | 475.716350      | 933.398874        | 467.203075       | 932.414858     | 466.711067       | F    | 911.462144         | 456.234710      | 894.435595  | 447.721436       | 893.451579     | 447.229428       | 7  |
| 9  | 1065.452366        | 533.229821      | 1048.425817       | 524.716547       | 1047.441801    | 524.224538       | D    | <b>764.393730</b>  | 382.700503      | 747.367181  | 374.187229       | 746.383165     | 373.695221       | 6  |
| 10 | 1178.536430        | 589.771853      | 1161.509881       | 581.258579       | 1160.525865    | 580.766570       | L    | <b>649.366787</b>  | 325.187032      | 632.340238  | 316.673757       | 631.356222     | 316.181749       | 5  |
| 11 | 1325.604844        | 663.306060      | 1308.578295       | 654.792786       | 1307.594279    | 654.300777       | F    | <b>536.282723</b>  | 268.645000      | 519.256174  | 260.131725       | 518.272158     | 259.639717       | 4  |
| 12 | 1440.631787        | 720.819532      | 1423.605238       | 712.306257       | 1422.621222    | 711.814249       | D    | 389.214309         | 195.110793      | 372.187760  | 186.597518       | 371.203744     | 186.105510       | 3  |
| 13 | <b>1539.700201</b> | 770.353739      | 1522.673652       | 761.840464       | 1521.689636    | 761.348456       | V    | <b>274.187366</b>  | 137.597321      | 257.160817  | 129.084047       |                |                  | 2  |
| 14 |                    |                 |                   |                  |                |                  | R    | <b>175.118952</b>  | 88.063114       | 158.092403  | 79.549839        |                |                  | 1  |

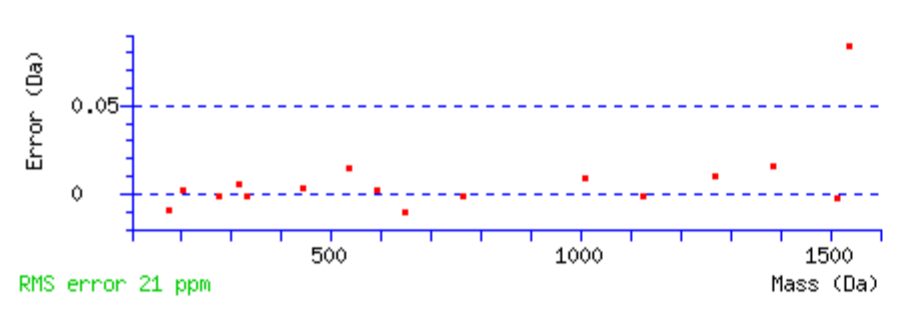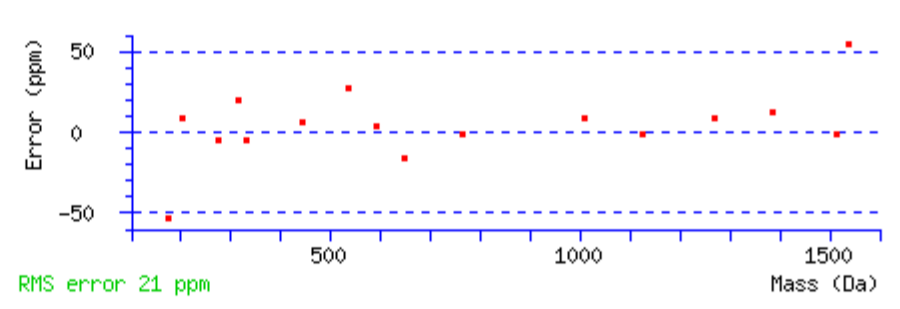

NCBI BLAST search of **NSELDPFDFLDVR**

(Parameters: blastp, nr protein database, expect=20000, no filter, PAM30)

Other BLAST [web gateways](#)

### All matches to this query

| Score | Mr(calc):   | Delta     | Sequence                          |
|-------|-------------|-----------|-----------------------------------|
| 71.4  | 1712.804611 | 0.003517  | <a href="#">NSELDPFDFLDVR</a>     |
| 4.9   | 1712.810486 | -0.002358 | <a href="#">IGTEPSTAPAPSPPAPK</a> |
| 3.0   | 1712.815186 | -0.007058 | <a href="#">LQGGTPQEPPNPRMK</a>   |
| 3.0   | 1712.815186 | -0.007058 | <a href="#">LQGGTPQEPPNPRMK</a>   |
| 3.0   | 1712.821716 | -0.013588 | <a href="#">VSTEIPASEPDGPSVGR</a> |
| 2.3   | 1712.821716 | -0.013588 | <a href="#">VSTEIPASEPDGPSVGR</a> |

# MASCOT Search Results

## Peptide View

MS/MS Fragmentation of **VSQAAADLK**

Found in **GBG5\_HUMAN**, Guanine nucleotide-binding protein G(I)/G(S)/G(O) subunit gamma-5 OS=Homo sapiens GN=GNG5 PE=1 SV=3

Match to Query 6160: 901.485628 from(451.750090,2+) rtinseconds(990) index(371)

Title: Locus:1.1.1.2010.3

Data file 2011-11-12 - TFD - EP 5-8.mgf

Click mouse within plot area to zoom in by factor of two about that point

Or, Plot from  to  Da

Label all possible matches  Label matches used for scoring

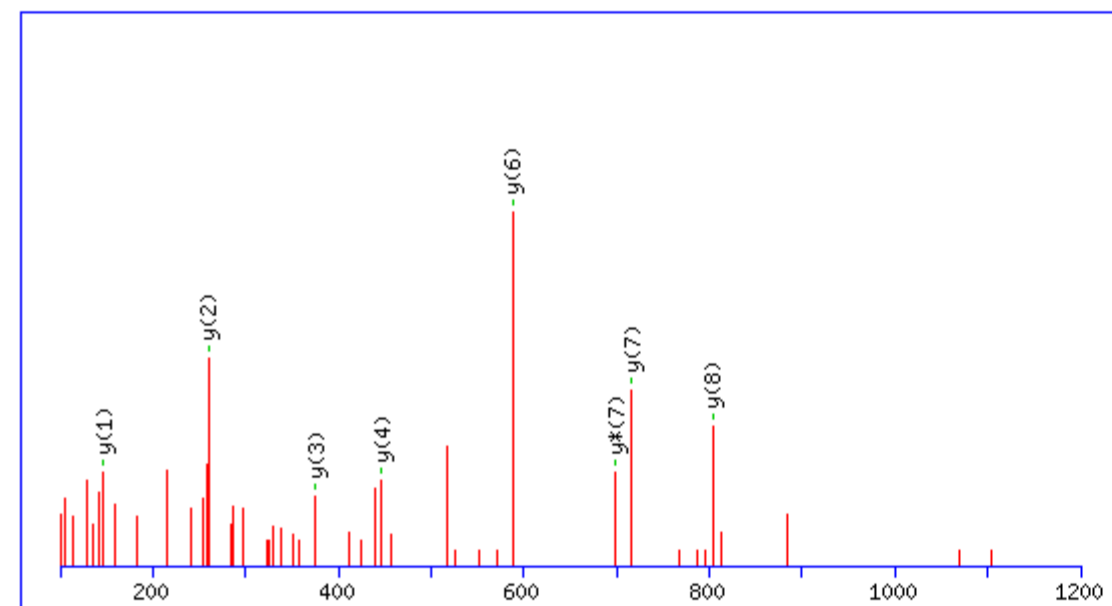

Monoisotopic mass of neutral peptide Mr(calc): 901.486877

Fixed modifications: Propionamide (C) (apply to specified residues or termini only)

Ions Score: 79 Expect: 2.3e-007

Matches : 8/86 fragment ions using 8 most intense peaks [\(help\)](#)

| # | b          | b <sup>++</sup> | b <sup>*</sup> | b <sup>*++</sup> | b <sup>0</sup> | b <sup>0++</sup> | Seq. | y          | y <sup>++</sup> | y <sup>*</sup> | y <sup>*++</sup> | y <sup>0</sup> | y <sup>0++</sup> | # |
|---|------------|-----------------|----------------|------------------|----------------|------------------|------|------------|-----------------|----------------|------------------|----------------|------------------|---|
| 1 | 100.075690 | 50.541483       |                |                  |                |                  | V    |            |                 |                |                  |                |                  | 9 |
| 2 | 187.107718 | 94.057497       |                |                  | 169.097153     | 85.052214        | S    | 803.425759 | 402.216518      | 786.399210     | 393.703243       | 785.415194     | 393.211235       | 8 |
| 3 | 315.166296 | 158.086786      | 298.139747     | 149.573512       | 297.155731     | 149.081504       | Q    | 716.393731 | 358.700504      | 699.367182     | 350.187229       | 698.383166     | 349.695221       | 7 |
| 4 | 386.203410 | 193.605343      | 369.176861     | 185.092069       | 368.192845     | 184.600061       | A    | 588.335153 | 294.671215      | 571.308604     | 286.157940       | 570.324588     | 285.665932       | 6 |
| 5 | 457.240524 | 229.123900      | 440.213975     | 220.610626       | 439.229959     | 220.118618       | A    | 517.298039 | 259.152658      | 500.271490     | 250.639383       | 499.287474     | 250.147375       | 5 |
| 6 | 528.277638 | 264.642457      | 511.251089     | 256.129183       | 510.267073     | 255.637175       | A    | 446.260925 | 223.634100      | 429.234376     | 215.120826       | 428.250360     | 214.628818       | 4 |
| 7 | 643.304581 | 322.155929      | 626.278032     | 313.642654       | 625.294016     | 313.150646       | D    | 375.223811 | 188.115543      | 358.197262     | 179.602269       | 357.213246     | 179.110261       | 3 |
| 8 | 756.388645 | 378.697961      | 739.362096     | 370.184686       | 738.378080     | 369.692678       | L    | 260.196868 | 130.602072      | 243.170319     | 122.088798       |                |                  | 2 |
| 9 |            |                 |                |                  |                |                  | K    | 147.112804 | 74.060040       | 130.086255     | 65.546765        |                |                  | 1 |

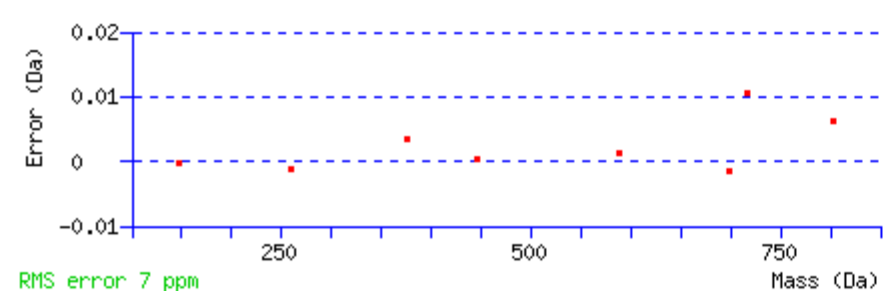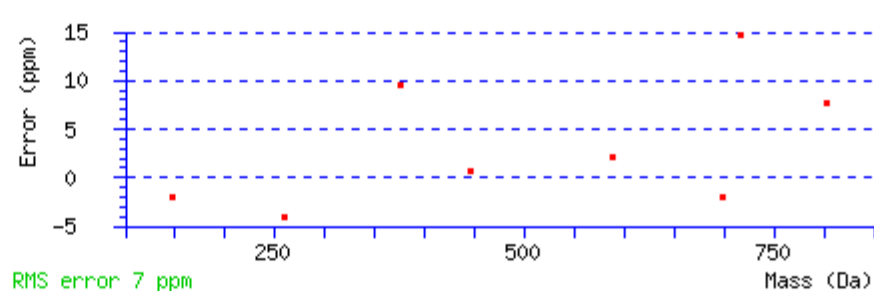

NCBI BLAST search of **VSQAAADLK**

(Parameters: blastp, nr protein database, expect=20000, no filter, PAM30)

Other BLAST [web gateways](#)

## All matches to this query

| Score | Mr(calc):  | Delta     | Sequence                   |
|-------|------------|-----------|----------------------------|
| 79.0  | 901.486877 | -0.001249 | <a href="#">VSQAAADLK</a>  |
| 15.0  | 901.486877 | -0.001249 | <a href="#">QEKAPVSK</a>   |
| 12.7  | 901.486893 | -0.001265 | <a href="#">GSPGASLGIK</a> |
| 11.2  | 901.476974 | 0.008654  | <a href="#">KWAAGQNK</a>   |
| 11.0  | 901.486877 | -0.001249 | <a href="#">VSEQLQAK</a>   |
| 9.9   | 901.486877 | -0.001249 | <a href="#">AASQVLGEK</a>  |
| 8.6   | 901.486877 | -0.001249 | <a href="#">QEQSAVIK</a>   |
| 8.2   | 901.486877 | -0.001249 | <a href="#">VNASAPSLK</a>  |
| 7.6   | 901.490906 | -0.005278 | <a href="#">DLVEWLK</a>    |
| 7.4   | 901.490921 | -0.005293 | <a href="#">AFVPPDLK</a>   |

# MASCOT SEARCH RESULTS

## Peptide View

MS/MS Fragmentation of **ILLGAGESGK**

Found in **GNA12\_HUMAN**, Guanine nucleotide-binding protein subunit alpha-12 OS=Homo sapiens GN=GNA12 PE=1 SV=4

Match to Query 18675: 1056.607628 from(529.311090,2+) rtinseconds(2410) index(31002)

Title: Locus:1.1.1.1307.15

Data file 2012-01-27 - TFD - Epitel - IEC - 10ul - 1.mgf

Click mouse within plot area to zoom in by factor of two about that point

Or, Plot from  to  Da

Label all possible matches  Label matches used for scoring

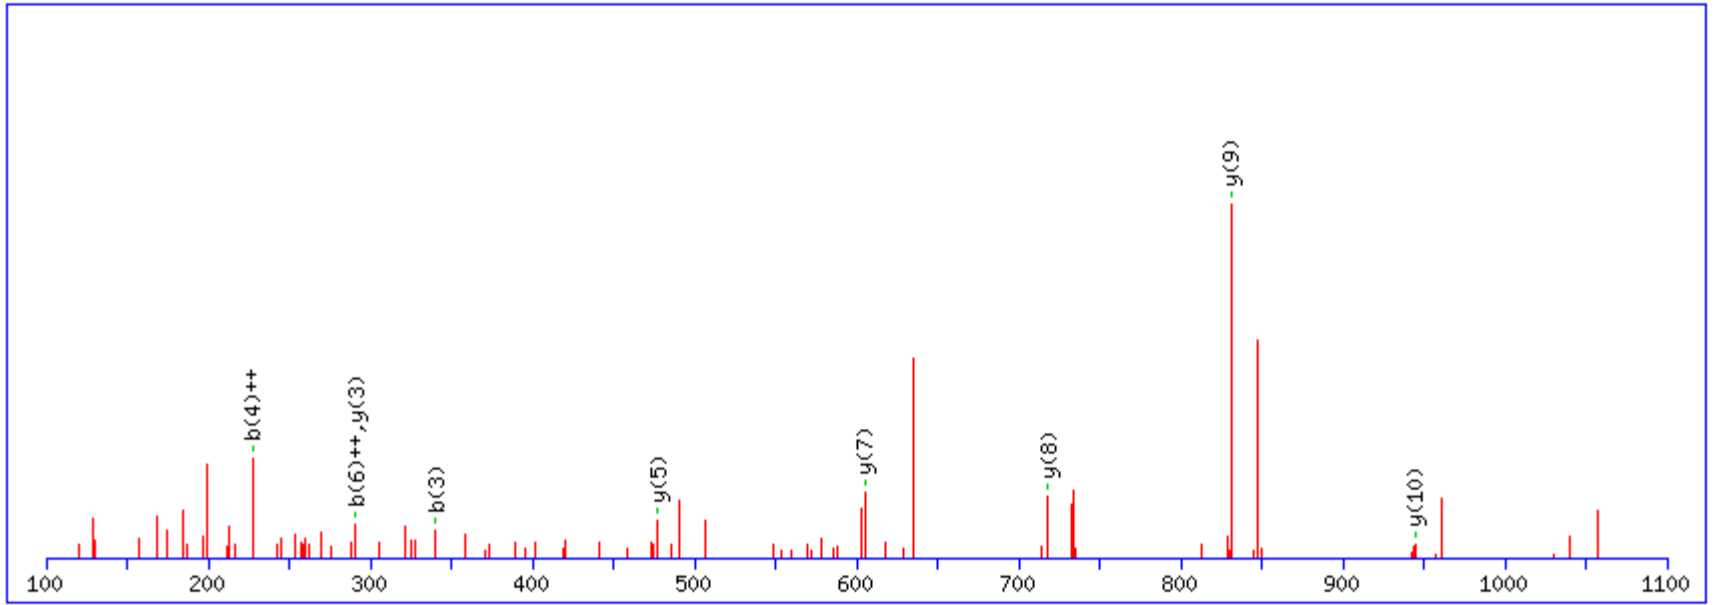

Monoisotopic mass of neutral peptide Mr(calc): 1056.617889

Fixed modifications: Carbamidomethyl (C) (apply to specified residues or termini only)

Ions Score: 31 Expect: 0.0082

Matches : 10/82 fragment ions using 20 most intense peaks ([help](#))

| #  | b                 | b <sup>++</sup>   | b <sup>0</sup> | b <sup>0++</sup> | Seq. | y                 | y <sup>++</sup> | y <sup>*</sup> | y <sup>*++</sup> | y <sup>0</sup> | y <sup>0++</sup> | #  |
|----|-------------------|-------------------|----------------|------------------|------|-------------------|-----------------|----------------|------------------|----------------|------------------|----|
| 1  | 114.091340        | 57.549308         |                |                  | I    |                   |                 |                |                  |                |                  | 11 |
| 2  | <b>227.175404</b> | 114.091340        |                |                  | L    | <b>944.541123</b> | 472.774200      | 927.514574     | 464.260925       | 926.530558     | 463.768917       | 10 |
| 3  | <b>340.259468</b> | 170.633372        |                |                  | L    | <b>831.457059</b> | 416.232168      | 814.430510     | 407.718893       | 813.446494     | 407.226885       | 9  |
| 4  | 453.343532        | <b>227.175404</b> |                |                  | L    | <b>718.372995</b> | 359.690136      | 701.346446     | 351.176861       | 700.362430     | 350.684853       | 8  |
| 5  | 510.364996        | 255.686136        |                |                  | G    | <b>605.288931</b> | 303.148104      | 588.262382     | 294.634829       | 587.278366     | 294.142821       | 7  |
| 6  | 581.402110        | <b>291.204693</b> |                |                  | A    | 548.267467        | 274.637372      | 531.240918     | 266.124097       | 530.256902     | 265.632089       | 6  |
| 7  | 638.423574        | 319.715425        |                |                  | G    | <b>477.230353</b> | 239.118815      | 460.203804     | 230.605540       | 459.219788     | 230.113532       | 5  |
| 8  | 767.466167        | 384.236722        | 749.455602     | 375.231439       | E    | 420.208889        | 210.608082      | 403.182340     | 202.094808       | 402.198324     | 201.602800       | 4  |
| 9  | 854.498195        | 427.752736        | 836.487630     | 418.747453       | S    | <b>291.166296</b> | 146.086786      | 274.139747     | 137.573512       | 273.155731     | 137.081504       | 3  |
| 10 | 911.519659        | 456.263468        | 893.509094     | 447.258185       | G    | 204.134268        | 102.570772      | 187.107719     | 94.057498        |                |                  | 2  |
| 11 |                   |                   |                |                  | K    | 147.112804        | 74.060040       | 130.086255     | 65.546765        |                |                  | 1  |

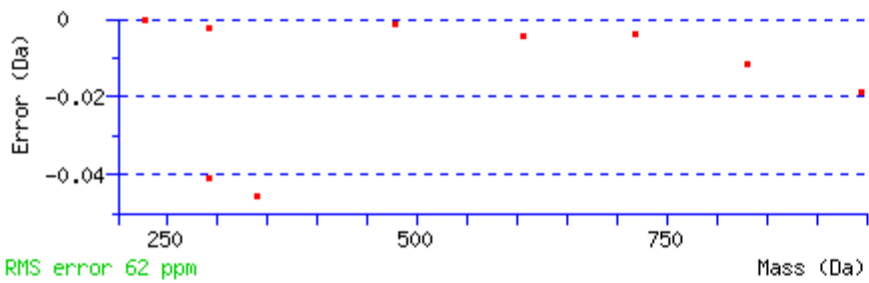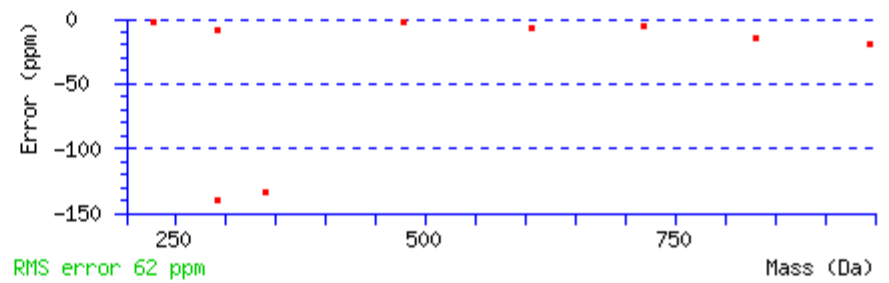

NCBI BLAST search of [ILLGAGESGK](#)

(Parameters: blastp, nr protein database, expect=20000, no filter, PAM30)

Other BLAST [web gateways](#)

## All matches to this query

| Score | Mr(calc):   | Delta     | Sequence                    |
|-------|-------------|-----------|-----------------------------|
| 30.6  | 1056.617889 | -0.010261 | <a href="#">ILLGAGESGK</a>  |
| 30.6  | 1056.617889 | -0.010261 | <a href="#">LLLLGAGESGK</a> |
| 29.6  | 1056.608002 | -0.000374 | <a href="#">LPVGAANFR</a>   |
| 11.8  | 1056.606659 | 0.000969  | <a href="#">LLPDITLEK</a>   |
| 6.2   | 1056.606659 | 0.000969  | <a href="#">LPLTDLEIK</a>   |
| 3.8   | 1056.617874 | -0.010246 | <a href="#">LLDQEAKLK</a>   |
| 3.1   | 1056.600143 | 0.007485  | <a href="#">IPVSRPILM</a>   |
| 2.0   | 1056.617905 | -0.010277 | <a href="#">ILVQLGETGK</a>  |

Mascot: <http://www.matrixscience.com/>



**MATRIX SCIENCE Mascot Search Results**

**Peptide View**

MS/MS Fragmentation of **EQVLQPVSAEELLEDIR**  
 Found in **GNL1\_HUMAN**, Guanine nucleotide-binding protein-like 1 OS=Homo sapiens GN=GNL1 PE=1 SV=2

Match to Query 60313: 1951.056762 from(651.359530,3+) rtinseconds(3937) index(55270)  
 Title: Locus:1.1.1.3128.24  
 Data file 2011-11-12 - TFD - EP 5-2.mgf

Click mouse within plot area to zoom in by factor of two about that point

Or, Plot from  to  Da

Label all possible matches  Label matches used for scoring

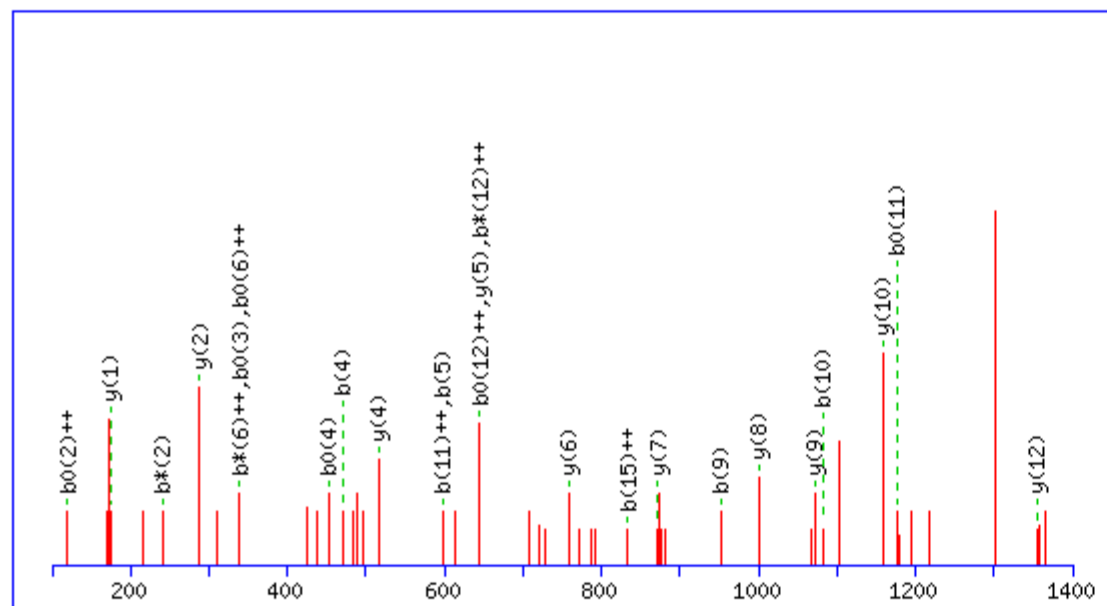

Monoisotopic mass of neutral peptide Mr(calc): 1951.062576  
 Fixed modifications: Propionamide (C) (apply to specified residues or termini only)  
 Ions Score: 48 Expect: 4.9e-005  
 Matches : 25/186 fragment ions using 44 most intense peaks [\(help\)](#)

| #  | b           | b <sup>++</sup> | b <sup>*</sup> | b <sup>*++</sup> | b <sup>0</sup> | b <sup>0++</sup> | Seq. | y           | y <sup>++</sup> | y <sup>*</sup> | y <sup>*++</sup> | y <sup>0</sup> | y <sup>0++</sup> | #  |
|----|-------------|-----------------|----------------|------------------|----------------|------------------|------|-------------|-----------------|----------------|------------------|----------------|------------------|----|
| 1  | 130.049869  | 65.528572       |                |                  | 112.039304     | 56.523290        | E    |             |                 |                |                  |                |                  | 17 |
| 2  | 258.108447  | 129.557862      | 241.081898     | 121.044587       | 240.097882     | 120.552579       | Q    | 1823.027291 | 912.017284      | 1806.000742    | 903.504009       | 1805.016726    | 903.012001       | 16 |
| 3  | 357.176861  | 179.092069      | 340.150312     | 170.578794       | 339.166296     | 170.086786       | V    | 1694.968713 | 847.987995      | 1677.942164    | 839.474720       | 1676.958148    | 838.982712       | 15 |
| 4  | 470.260925  | 235.634101      | 453.234376     | 227.120826       | 452.250360     | 226.628818       | L    | 1595.900299 | 798.453787      | 1578.873750    | 789.940513       | 1577.889734    | 789.448505       | 14 |
| 5  | 598.319503  | 299.663390      | 581.292954     | 291.150115       | 580.308938     | 290.658107       | Q    | 1482.816235 | 741.911756      | 1465.789686    | 733.398481       | 1464.805670    | 732.906473       | 13 |
| 6  | 695.372267  | 348.189772      | 678.345718     | 339.676497       | 677.361702     | 339.184489       | P    | 1354.757657 | 677.882466      | 1337.731108    | 669.369192       | 1336.747092    | 668.877184       | 12 |
| 7  | 794.440681  | 397.723979      | 777.414132     | 389.210704       | 776.430116     | 388.718696       | V    | 1257.704893 | 629.356084      | 1240.678344    | 620.842810       | 1239.694328    | 620.350802       | 11 |
| 8  | 881.472709  | 441.239993      | 864.446160     | 432.726718       | 863.462144     | 432.234710       | S    | 1158.636479 | 579.821878      | 1141.609930    | 571.308603       | 1140.625914    | 570.816595       | 10 |
| 9  | 952.509823  | 476.758550      | 935.483274     | 468.245275       | 934.499258     | 467.753267       | A    | 1071.604451 | 536.305863      | 1054.577902    | 527.792589       | 1053.593886    | 527.300581       | 9  |
| 10 | 1081.552416 | 541.279846      | 1064.525867    | 532.766572       | 1063.541851    | 532.274564       | E    | 1000.567337 | 500.787307      | 983.540788     | 492.274032       | 982.556772     | 491.782024       | 8  |
| 11 | 1194.636480 | 597.821878      | 1177.609931    | 589.308604       | 1176.625915    | 588.816596       | L    | 871.524744  | 436.266010      | 854.498195     | 427.752735       | 853.514179     | 427.260727       | 7  |
| 12 | 1307.720544 | 654.363910      | 1290.693995    | 645.850636       | 1289.709979    | 645.358628       | L    | 758.440680  | 379.723978      | 741.414131     | 371.210703       | 740.430115     | 370.718695       | 6  |
| 13 | 1436.763137 | 718.885207      | 1419.736588    | 710.371932       | 1418.752572    | 709.879924       | E    | 645.356616  | 323.181946      | 628.330067     | 314.668672       | 627.346051     | 314.176664       | 5  |
| 14 | 1549.847201 | 775.427239      | 1532.820652    | 766.913964       | 1531.836636    | 766.421956       | L    | 516.314023  | 258.660649      | 499.287474     | 250.147375       | 498.303458     | 249.655367       | 4  |
| 15 | 1664.874144 | 832.940710      | 1647.847595    | 824.427436       | 1646.863579    | 823.935428       | D    | 403.229959  | 202.118617      | 386.203410     | 193.605343       | 385.219394     | 193.113335       | 3  |
| 16 | 1777.958208 | 889.482742      | 1760.931659    | 880.969468       | 1759.947643    | 880.477460       | I    | 288.203016  | 144.605146      | 271.176467     | 136.091871       |                |                  | 2  |
| 17 |             |                 |                |                  |                |                  | R    | 175.118952  | 88.063114       | 158.092403     | 79.549839        |                |                  | 1  |

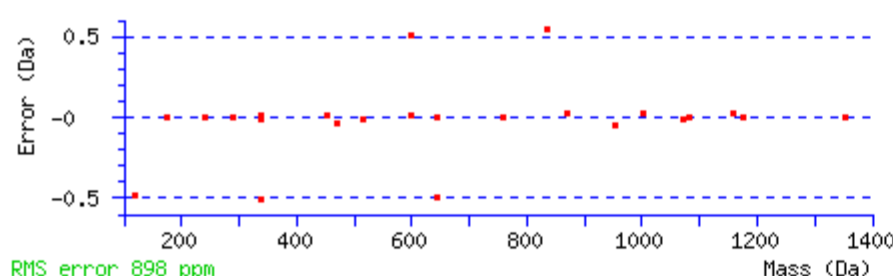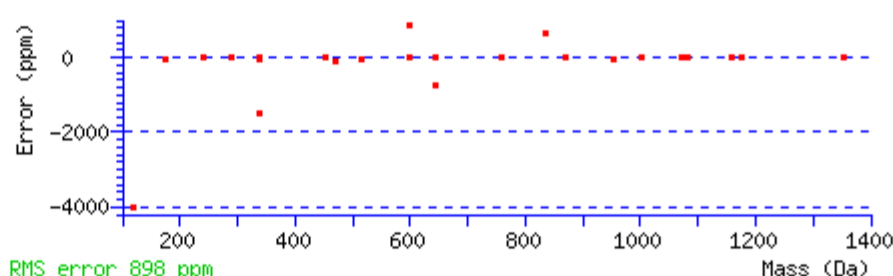

NCBI BLAST search of **EQVLQPVSAEELLEDIR**  
 (Parameters: blastp, nr protein database, expect=20000, no filter, PAM30)  
 Other BLAST [web gateways](#)

**All matches to this query**

| Score | Mr(calc):   | Delta     | Sequence                           |
|-------|-------------|-----------|------------------------------------|
| 47.8  | 1951.062576 | -0.005814 | <a href="#">EQVLQPVSAEELLEDIR</a>  |
| 1.8   | 1951.067307 | -0.010545 | <a href="#">CHLGQLAKGTEVSVGLLR</a> |

# MATRIX SCIENCE Mascot Search Results

## Peptide View

MS/MS Fragmentation of **VAVQAVQAMNR**

Found in **KGUA\_HUMAN**, Guanylate kinase OS=Homo sapiens GN=GUK1 PE=1 SV=2

Match to Query 30318: 1201.624548 from(601.819550,2+) rtinseconds(1205) index(4496)

Title: Locus:1.1.1.1729.34

Data file 2011-11-14 - TFD - EP 8-6.mgf

Click mouse within plot area to zoom in by factor of two about that point

Or, Plot from  to  Da

Label all possible matches  Label matches used for scoring

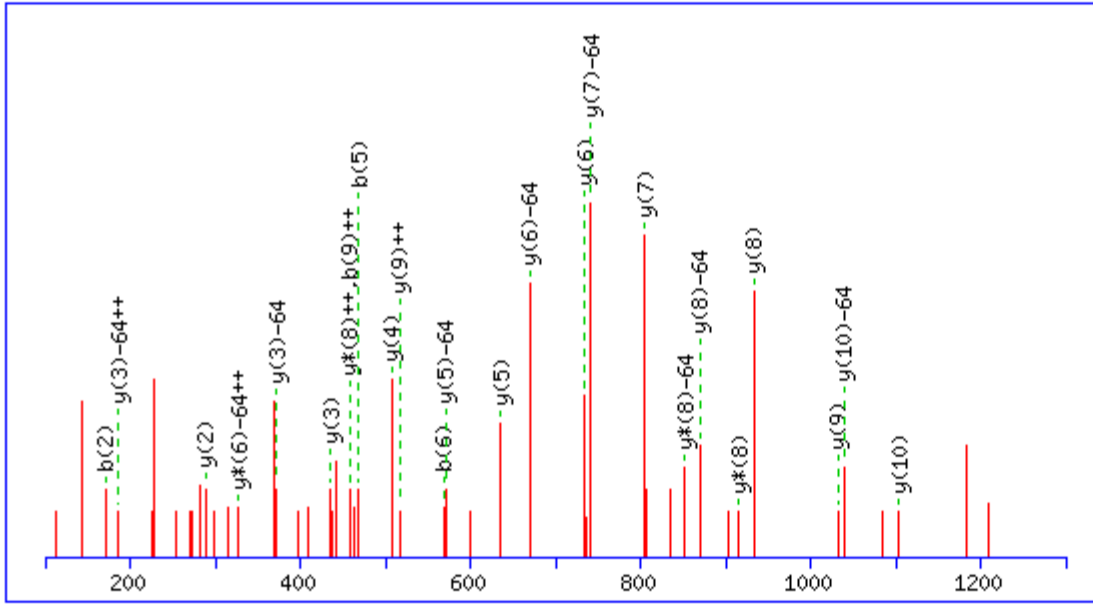

Monoisotopic mass of neutral peptide Mr(calc): 1201.623734

Fixed modifications: Propionamide (C) (apply to specified residues or termini only)

Variable modifications:

M9 : Oxidation (M), with neutral losses 0.000000 (shown in table), 63.998285

Ions Score: 60 Expect: 1.4e-005

Matches : 25/114 fragment ions using 42 most intense peaks ([help](#))

| #  | b                 | b <sup>++</sup>   | b <sup>*</sup> | b <sup>*++</sup> | Seq. | y                  | y <sup>++</sup>   | y <sup>*</sup>    | y <sup>*++</sup>  | #  |
|----|-------------------|-------------------|----------------|------------------|------|--------------------|-------------------|-------------------|-------------------|----|
| 1  | 100.075690        | 50.541483         |                |                  | V    |                    |                   |                   |                   | 11 |
| 2  | <b>171.112804</b> | 86.060040         |                |                  | A    | <b>1103.562605</b> | 552.284940        | 1086.536056       | 543.771666        | 10 |
| 3  | 270.181218        | 135.594247        |                |                  | V    | <b>1032.525491</b> | <b>516.766383</b> | 1015.498942       | 508.253109        | 9  |
| 4  | 398.239796        | 199.623536        | 381.213247     | 191.110262       | Q    | <b>933.457077</b>  | 467.232176        | <b>916.430528</b> | <b>458.718902</b> | 8  |
| 5  | <b>469.276910</b> | 235.142093        | 452.250361     | 226.628818       | A    | <b>805.398499</b>  | 403.202887        | 788.371950        | 394.689613        | 7  |
| 6  | <b>568.345324</b> | 284.676300        | 551.318775     | 276.163026       | V    | <b>734.361385</b>  | 367.684330        | 717.334836        | 359.171056        | 6  |
| 7  | 696.403902        | 348.705589        | 679.377353     | 340.192315       | Q    | <b>635.292971</b>  | 318.150124        | 618.266422        | 309.636849        | 5  |
| 8  | 767.441016        | 384.224146        | 750.414467     | 375.710872       | A    | <b>507.234393</b>  | 254.120834        | 490.207844        | 245.607560        | 4  |
| 9  | 914.476416        | <b>457.741846</b> | 897.449867     | 449.228571       | M    | <b>436.197279</b>  | 218.602277        | 419.170730        | 210.089003        | 3  |
| 10 | 1028.519343       | 514.763309        | 1011.492794    | 506.250035       | N    | <b>289.161879</b>  | 145.084577        | 272.135330        | 136.571303        | 2  |
| 11 |                   |                   |                |                  | R    | 175.118952         | 88.063114         | 158.092403        | 79.549839         | 1  |

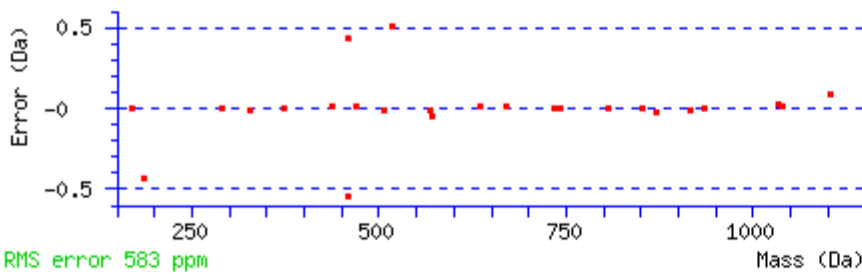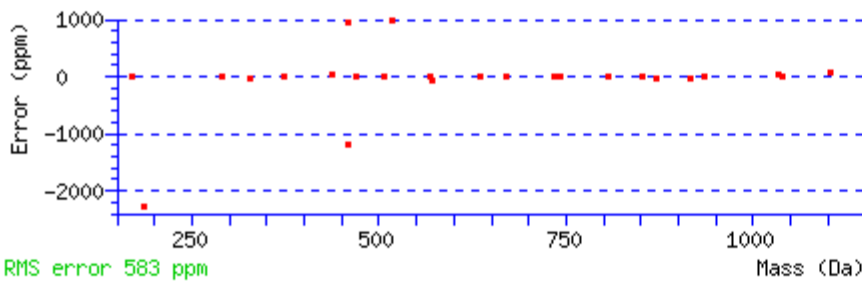

NCBI BLAST search of [VAVQAVQAMNR](#)

(Parameters: blastp, nr protein database, expect=20000, no filter, PAM30)

Other BLAST [web gateways](#)

All matches to this query

| Score | Mr(calc):   | Delta    | Sequence                    |
|-------|-------------|----------|-----------------------------|
| 60.4  | 1201.623734 | 0.000814 | <a href="#">VAVQAVQAMNR</a> |

# **MASCOT** Mascot Search Results

## Peptide View

MS/MS Fragmentation of **VDEIFGQLR**

Found in **GARI\_HUMAN**, H/ACA ribonucleoprotein complex subunit 1 OS=Homo sapiens GN=GAR1 PE=1 SV=1

Match to Query 21858: 1075.565308 from(538.789930,2+) rtinseconds(2700) index(34301)

Title: Locus:1.1.1.2343.20

Data file 2011-11-10 - TFD - EP 4-5.mgf

Click mouse within plot area to zoom in by factor of two about that point

Or, Plot from  to  Da

Label all possible matches  Label matches used for scoring

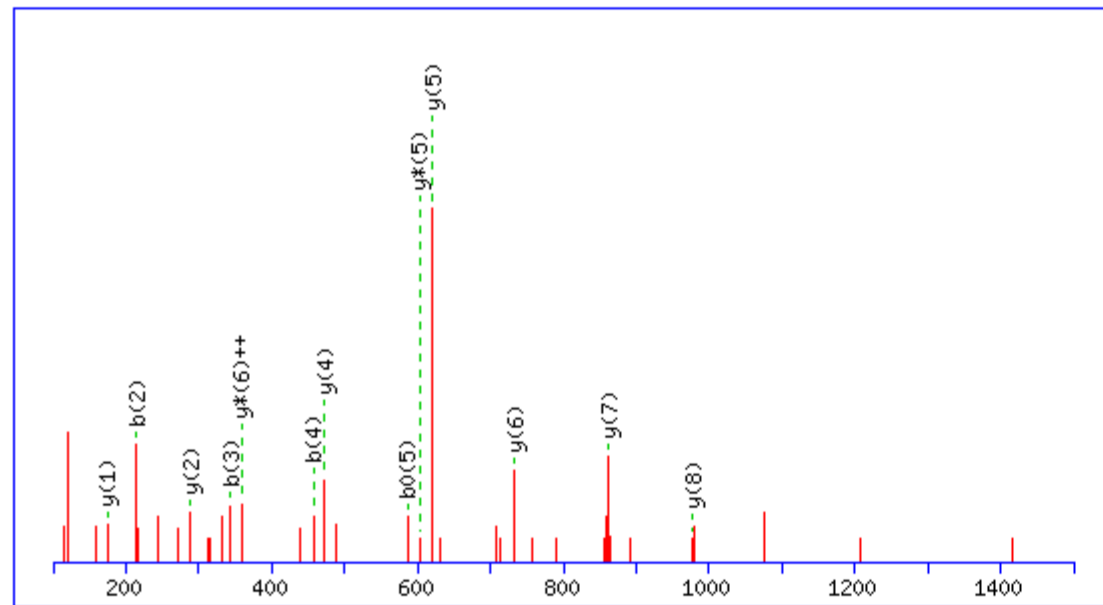

Monoisotopic mass of neutral peptide Mr(calc): 1075.566208

Fixed modifications: Propionamide (C) (apply to specified residues or termini only)

Ions Score: 59 Expect: 1.6e-005

Matches : 13/70 fragment ions using 18 most intense peaks [\(help\)](#)

| # | b                 | b <sup>++</sup> | b <sup>+</sup> | b <sup>+++</sup> | b <sup>0</sup>    | b <sup>0++</sup> | Seq. | y                 | y <sup>++</sup> | y <sup>+</sup>    | y <sup>+++</sup>  | y <sup>0</sup> | y <sup>0++</sup> | # |
|---|-------------------|-----------------|----------------|------------------|-------------------|------------------|------|-------------------|-----------------|-------------------|-------------------|----------------|------------------|---|
| 1 | 100.075690        | 50.541483       |                |                  |                   |                  | V    |                   |                 |                   |                   |                |                  | 9 |
| 2 | <b>215.102633</b> | 108.054954      |                |                  | 197.092068        | 99.049672        | D    | <b>977.505072</b> | 489.256174      | 960.478523        | 480.742900        | 959.494507     | 480.250892       | 8 |
| 3 | <b>344.145226</b> | 172.576251      |                |                  | 326.134661        | 163.570969       | E    | <b>862.478129</b> | 431.742703      | 845.451580        | 423.229428        | 844.467564     | 422.737420       | 7 |
| 4 | <b>457.229290</b> | 229.118283      |                |                  | 439.218725        | 220.113001       | I    | <b>733.435536</b> | 367.221406      | 716.408987        | <b>358.708132</b> |                |                  | 6 |
| 5 | 604.297704        | 302.652490      |                |                  | <b>586.287139</b> | 293.647208       | F    | <b>620.351472</b> | 310.679374      | <b>603.324923</b> | 302.166100        |                |                  | 5 |
| 6 | 661.319168        | 331.163222      |                |                  | 643.308603        | 322.157940       | G    | <b>473.283058</b> | 237.145167      | 456.256509        | 228.631893        |                |                  | 4 |
| 7 | 789.377746        | 395.192511      | 772.351197     | 386.679237       | 771.367181        | 386.187229       | Q    | 416.261594        | 208.634435      | 399.235045        | 200.121161        |                |                  | 3 |
| 8 | 902.461810        | 451.734543      | 885.435261     | 443.221269       | 884.451245        | 442.729261       | L    | <b>288.203016</b> | 144.605146      | 271.176467        | 136.091872        |                |                  | 2 |
| 9 |                   |                 |                |                  |                   |                  | R    | <b>175.118952</b> | 88.063114       | 158.092403        | 79.549840         |                |                  | 1 |

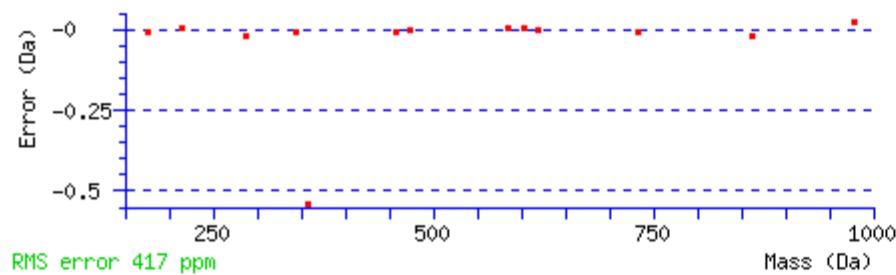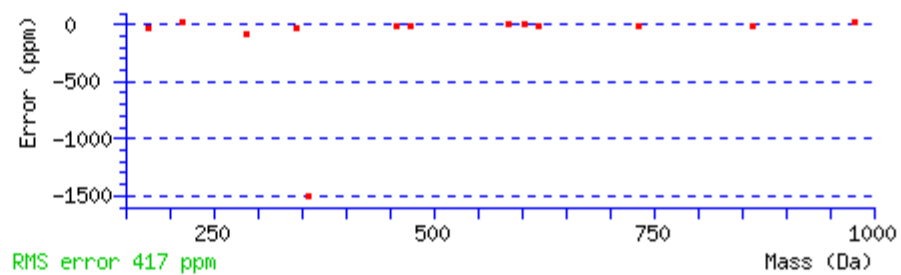

NCBI BLAST search of [VDEIFGQLR](#)

(Parameters: blastp, nr protein database, expect=20000, no filter, PAM30)

Other BLAST [web gateways](#)

## All matches to this query

| Score | Mr(calc):   | Delta     | Sequence                   |
|-------|-------------|-----------|----------------------------|
| 59.3  | 1075.566208 | -0.000900 | <a href="#">VDEIFGQLR</a>  |
| 9.2   | 1075.569565 | -0.004257 | <a href="#">MLVLDSDKR</a>  |
| 7.4   | 1075.569550 | -0.004242 | <a href="#">LTEGKIMER</a>  |
| 4.1   | 1075.570236 | -0.004928 | <a href="#">VEPFLGTWK</a>  |
| 3.3   | 1075.566223 | -0.000915 | <a href="#">VLFSTQPPR</a>  |
| 2.1   | 1075.573593 | -0.008285 | <a href="#">DMPLNIFVK</a>  |
| 1.7   | 1075.573395 | -0.008087 | <a href="#">SGLSRSSNLR</a> |

Mascot: <http://www.matrixscience.com/>

**Peptide View**

MS/MS Fragmentation of **VLMTQQPRPVL**

Found in **NOP10\_HUMAN**, H/ACA ribonucleoprotein complex subunit 3 OS=Homo sapiens GN=NOP10 PE=1 SV=1

Match to Query 19692: 1296.725708 from(649.370130,2+) rtinseconds(2047) index(9602)

Title: Locus:1.1.1.2295.42

Data file 2011-11-12 - TFD - EP 6-8.mgf

Click mouse within plot area to zoom in by factor of two about that point

Or, Plot from  to  Da

Label all possible matches  Label matches used for scoring

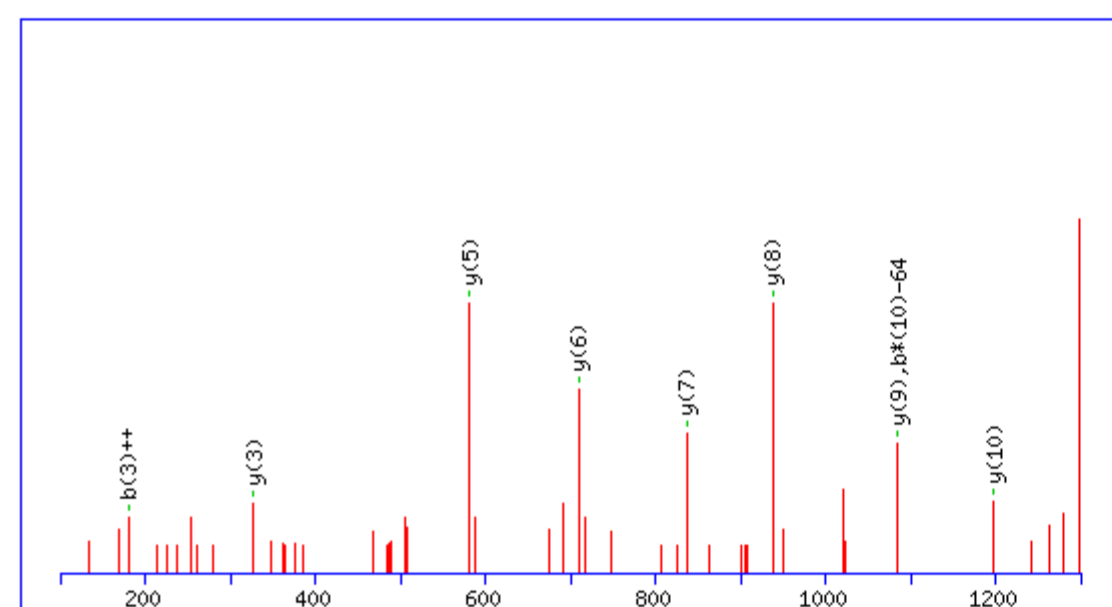

Monoisotopic mass of neutral peptide Mr(calc): 1296.722397

Fixed modifications: Propionamide (C) (apply to specified residues or termini only)

Variable modifications:

M3 : Oxidation (M), with neutral losses 0.000000 (shown in table), 63.998285

Ions Score: 55 Expect: 1.6e-005

Matches : 9/140 fragment ions using 12 most intense peaks ([help](#))

| #  | b           | b <sup>++</sup>   | b <sup>*</sup> | b <sup>*++</sup> | b <sup>0</sup> | b <sup>0++</sup> | Seq. | y                  | y <sup>++</sup> | y <sup>*</sup> | y <sup>*++</sup> | y <sup>0</sup> | y <sup>0++</sup> | #  |
|----|-------------|-------------------|----------------|------------------|----------------|------------------|------|--------------------|-----------------|----------------|------------------|----------------|------------------|----|
| 1  | 100.075690  | 50.541483         |                |                  |                |                  | V    |                    |                 |                |                  |                |                  | 11 |
| 2  | 213.159754  | 107.083515        |                |                  |                |                  | L    | <b>1198.661257</b> | 599.834267      | 1181.634708    | 591.320992       | 1180.650692    | 590.828984       | 10 |
| 3  | 360.195154  | <b>180.601215</b> |                |                  |                |                  | M    | <b>1085.577193</b> | 543.292235      | 1068.550644    | 534.778960       | 1067.566628    | 534.286952       | 9  |
| 4  | 461.242833  | 231.125054        |                |                  | 443.232268     | 222.119772       | T    | <b>938.541793</b>  | 469.774535      | 921.515244     | 461.261260       | 920.531228     | 460.769252       | 8  |
| 5  | 589.301411  | 295.154344        | 572.274862     | 286.641069       | 571.290846     | 286.149061       | Q    | <b>837.494114</b>  | 419.250695      | 820.467565     | 410.737421       |                |                  | 7  |
| 6  | 717.359989  | 359.183633        | 700.333440     | 350.670358       | 699.349424     | 350.178350       | Q    | <b>709.435536</b>  | 355.221406      | 692.408987     | 346.708132       |                |                  | 6  |
| 7  | 814.412753  | 407.710015        | 797.386204     | 399.196740       | 796.402188     | 398.704732       | P    | <b>581.376958</b>  | 291.192117      | 564.350409     | 282.678843       |                |                  | 5  |
| 8  | 970.513864  | 485.760570        | 953.487315     | 477.247296       | 952.503299     | 476.755288       | R    | 484.324194         | 242.665735      | 467.297645     | 234.152460       |                |                  | 4  |
| 9  | 1067.566628 | 534.286952        | 1050.540079    | 525.773678       | 1049.556063    | 525.281670       | P    | <b>328.223083</b>  | 164.615179      |                |                  |                |                  | 3  |
| 10 | 1166.635042 | 583.821159        | 1149.608493    | 575.307885       | 1148.624477    | 574.815877       | V    | 231.170319         | 116.088797      |                |                  |                |                  | 2  |
| 11 |             |                   |                |                  |                |                  | L    | 132.101905         | 66.554590       |                |                  |                |                  | 1  |

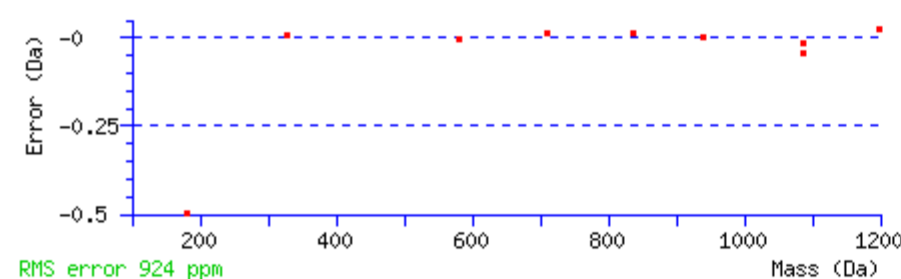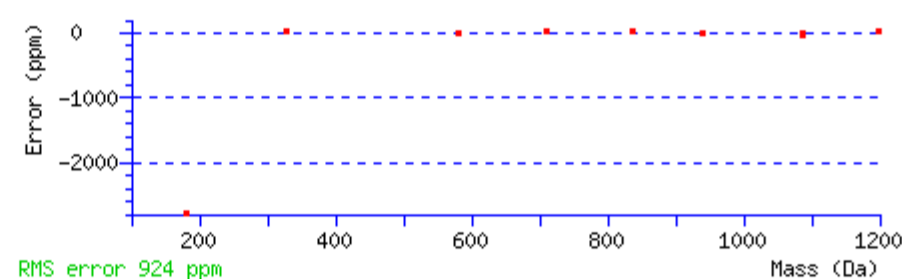

NCBI BLAST search of **VLMTQQPRPVL**

(Parameters: blastp, nr protein database, expect=20000, no filter, PAM30)

Other BLAST [web gateways](#)

**All matches to this query**

| Score | Mr(calc):   | Delta    | Sequence                    |
|-------|-------------|----------|-----------------------------|
| 55.3  | 1296.722397 | 0.003311 | <a href="#">VLMTQQPRPVL</a> |
| 4.4   | 1296.722382 | 0.003326 | <a href="#">VLSHNLCTVLK</a> |
| 4.0   | 1296.722397 | 0.003311 | <a href="#">VLMTQQPRPVL</a> |
| 3.9   | 1296.719009 | 0.006699 | <a href="#">VIPPKWKPR</a>   |

# Mascot Search Results

## Peptide View

MS/MS Fragmentation of **LAAQVLGLLLEK**

Found in **HTR7A\_HUMAN**, HEAT repeat-containing protein 7A OS=Homo sapiens GN=HEATR7A PE=1 SV=3

Match to Query 33042: 1266.794728 from(634.404640,2+) rtinseconds(3883) index(56876)

Title: Locus:1.1.1.2889.22

Data file 2011-11-10 - TFD - EP 3-1.mgf

Click mouse within plot area to zoom in by factor of two about that point

Or, Plot from  to  Da

Label all possible matches  Label matches used for scoring

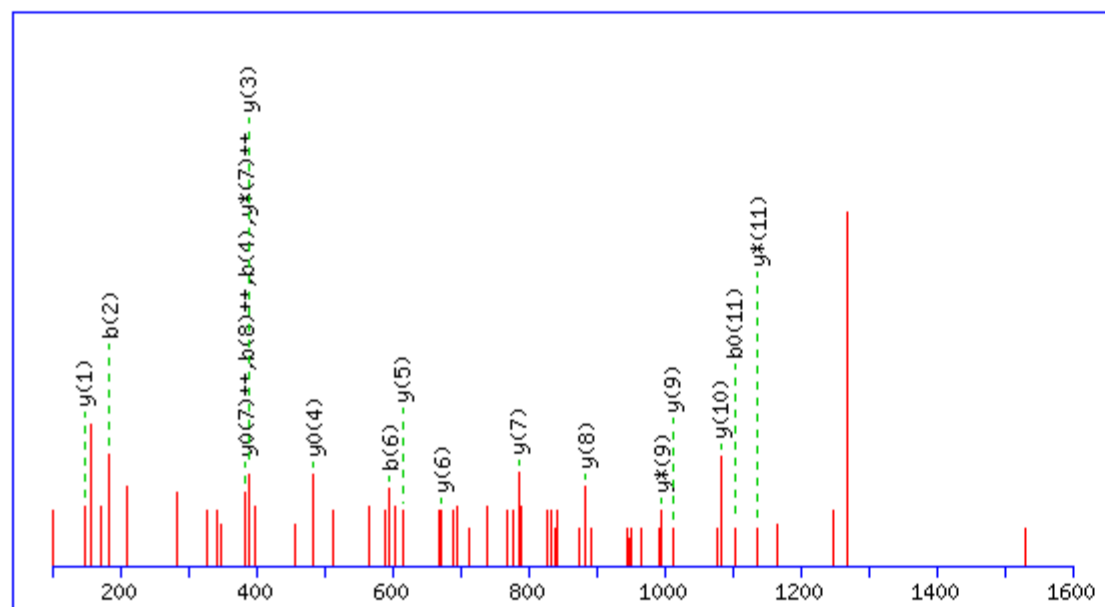

Monoisotopic mass of neutral peptide Mr(calc): 1266.791092

Fixed modifications: Propionamide (C) (apply to specified residues or termini only)

Ions Score: 37 Expect: 0.00018

Matches : 18/104 fragment ions using 39 most intense peaks [\(help\)](#)

| #  | b                 | b <sup>++</sup>   | b <sup>*</sup> | b <sup>+++</sup> | b <sup>0</sup>     | b <sup>0++</sup> | Seq. | y                  | y <sup>++</sup> | y <sup>*</sup>     | y <sup>+++</sup>  | y <sup>0</sup>    | y <sup>0++</sup>  | #  |
|----|-------------------|-------------------|----------------|------------------|--------------------|------------------|------|--------------------|-----------------|--------------------|-------------------|-------------------|-------------------|----|
| 1  | 114.091340        | 57.549308         |                |                  |                    |                  | L    |                    |                 |                    |                   |                   |                   | 12 |
| 2  | <b>185.128454</b> | 93.067865         |                |                  |                    |                  | A    | 1154.714337        | 577.860807      | <b>1137.687788</b> | 569.347532        | 1136.703772       | 568.855524        | 11 |
| 3  | 256.165568        | 128.586422        |                |                  |                    |                  | A    | <b>1083.677223</b> | 542.342250      | 1066.650674        | 533.828975        | 1065.666658       | 533.336967        | 10 |
| 4  | <b>384.224146</b> | 192.615711        | 367.197597     | 184.102436       |                    |                  | Q    | <b>1012.640109</b> | 506.823693      | <b>995.613560</b>  | 498.310418        | 994.629544        | 497.818410        | 9  |
| 5  | 483.292560        | 242.149918        | 466.266011     | 233.636643       |                    |                  | V    | <b>884.581531</b>  | 442.794404      | 867.554982         | 434.281129        | 866.570966        | 433.789121        | 8  |
| 6  | <b>596.376624</b> | 298.691950        | 579.350075     | 290.178676       |                    |                  | L    | <b>785.513117</b>  | 393.260197      | 768.486568         | <b>384.746922</b> | 767.502552        | <b>384.254914</b> | 7  |
| 7  | 653.398088        | 327.202682        | 636.371539     | 318.689408       |                    |                  | G    | <b>672.429053</b>  | 336.718165      | 655.402504         | 328.204890        | 654.418488        | 327.712882        | 6  |
| 8  | 766.482152        | <b>383.744714</b> | 749.455603     | 375.231440       |                    |                  | L    | <b>615.407589</b>  | 308.207433      | 598.381040         | 299.694158        | 597.397024        | 299.202150        | 5  |
| 9  | 879.566216        | 440.286746        | 862.539667     | 431.773472       |                    |                  | L    | 502.323525         | 251.665401      | 485.296976         | 243.152126        | <b>484.312960</b> | 242.660118        | 4  |
| 10 | 992.650280        | 496.828778        | 975.623731     | 488.315504       |                    |                  | L    | <b>389.239461</b>  | 195.123369      | 372.212912         | 186.610094        | 371.228896        | 186.118086        | 3  |
| 11 | 1121.692873       | 561.350075        | 1104.666324    | 552.836800       | <b>1103.682308</b> | 552.344792       | E    | 276.155397         | 138.581337      | 259.128848         | 130.068062        | 258.144832        | 129.576054        | 2  |
| 12 |                   |                   |                |                  |                    |                  | K    | <b>147.112804</b>  | 74.060040       | 130.086255         | 65.546765         |                   |                   | 1  |

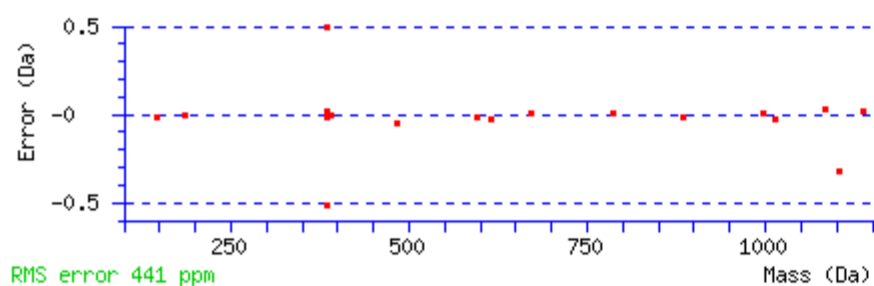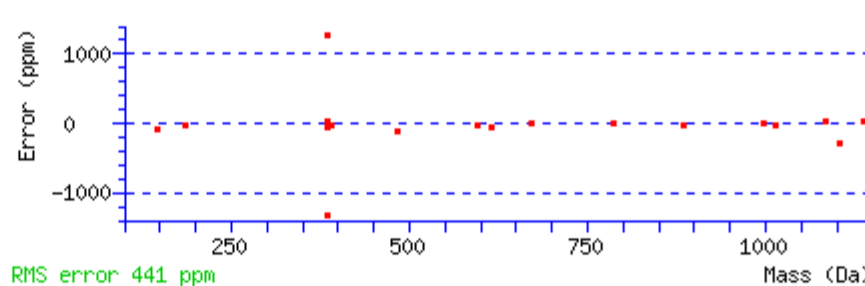

NCBI BLAST search of **LAAQVLGLLLEK**

(Parameters: blastp, nr protein database, expect=20000, no filter, PAM30)

Other BLAST [web gateways](#)

All matches to this query

| Score | Mr(calc):   | Delta    | Sequence                     |
|-------|-------------|----------|------------------------------|
| 37.4  | 1266.791092 | 0.003636 | <a href="#">LAAQVLGLLLEK</a> |

Mascot: <http://www.matrixscience.com/>

# Mascot Search Results

## Peptide View

MS/MS Fragmentation of **LLPTLPPDKK**

Found in **HEN1\_HUMAN**, Helix-loop-helix protein 1 OS=Homo sapiens GN=NHLH1 PE=2 SV=1

Match to Query 26864: 1152.682408 from(577.348480,2+) rtinseconds(4305) index(64107)

Title: Locus:1.1.1.2969.17

Data file 2011-11-10 - TFD - EP 3-4.mgf

Click mouse within plot area to zoom in by factor of two about that point

Or, Plot from  to  Da

Label all possible matches  Label matches used for scoring

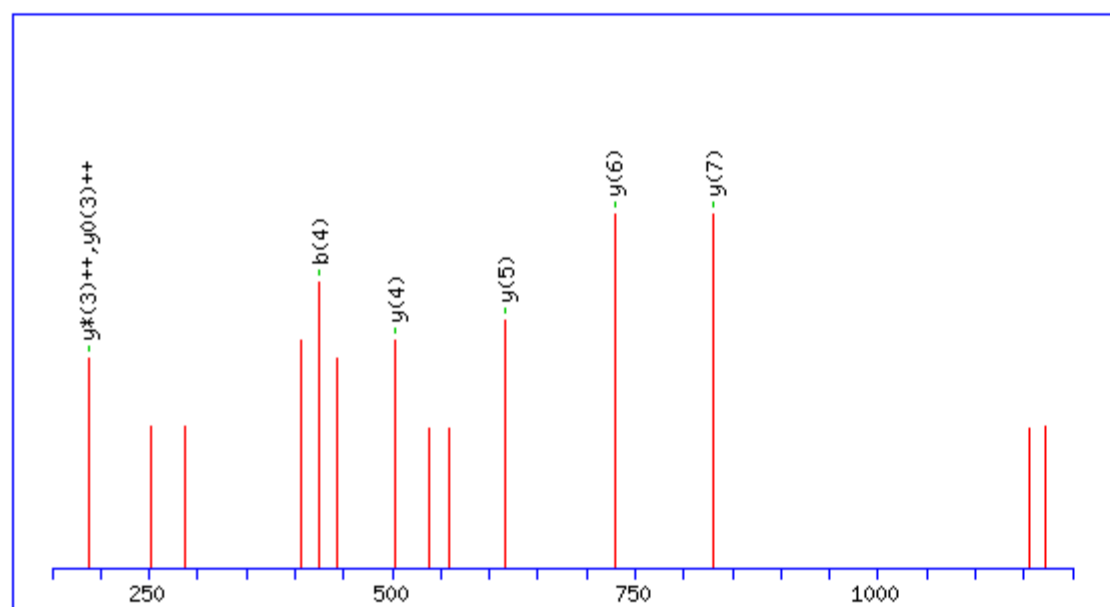

Monoisotopic mass of neutral peptide Mr(calc): 1152.675415

Fixed modifications: Propionamide (C) (apply to specified residues or termini only)

Variable modifications:

P6 : Oxidation (P)

P7 : Oxidation (P)

Ions Score: 33 Expect: 0.0017

Matches : 7/82 fragment ions using 6 most intense peaks ([help](#))

| #  | b                 | b <sup>++</sup> | b <sup>*</sup> | b <sup>*++</sup> | b <sup>0</sup> | b <sup>0++</sup> | Seq. | y                 | y <sup>++</sup> | y <sup>*</sup> | y <sup>*++</sup>  | y <sup>0</sup> | y <sup>0++</sup>  | #  |
|----|-------------------|-----------------|----------------|------------------|----------------|------------------|------|-------------------|-----------------|----------------|-------------------|----------------|-------------------|----|
| 1  | 114.091340        | 57.549308       |                |                  |                |                  | L    |                   |                 |                |                   |                |                   | 10 |
| 2  | 227.175404        | 114.091340      |                |                  |                |                  | L    | 1040.598639       | 520.802958      | 1023.572090    | 512.289683        | 1022.588074    | 511.797675        | 9  |
| 3  | 324.228168        | 162.617722      |                |                  |                |                  | P    | 927.514575        | 464.260926      | 910.488026     | 455.747651        | 909.504010     | 455.255643        | 8  |
| 4  | <b>425.275847</b> | 213.141561      |                |                  | 407.265282     | 204.136279       | T    | <b>830.461811</b> | 415.734544      | 813.435262     | 407.221269        | 812.451246     | 406.729261        | 7  |
| 5  | 538.359911        | 269.683594      |                |                  | 520.349346     | 260.678311       | L    | <b>729.414132</b> | 365.210704      | 712.387583     | 356.697430        | 711.403567     | 356.205422        | 6  |
| 6  | 651.407590        | 326.207433      |                |                  | 633.397025     | 317.202151       | P    | <b>616.330068</b> | 308.668672      | 599.303519     | 300.155398        | 598.319503     | 299.663390        | 5  |
| 7  | 764.455269        | 382.731273      |                |                  | 746.444704     | 373.725990       | P    | <b>503.282389</b> | 252.144833      | 486.255840     | 243.631558        | 485.271824     | 243.139550        | 4  |
| 8  | 879.482212        | 440.244744      |                |                  | 861.471647     | 431.239462       | D    | 390.234710        | 195.620993      | 373.208161     | <b>187.107719</b> | 372.224145     | <b>186.615711</b> | 3  |
| 9  | 1007.577175       | 504.292226      | 990.550626     | 495.778951       | 989.566610     | 495.286943       | K    | 275.207767        | 138.107522      | 258.181218     | 129.594247        |                |                   | 2  |
| 10 |                   |                 |                |                  |                |                  | K    | 147.112804        | 74.060040       | 130.086255     | 65.546766         |                |                   | 1  |

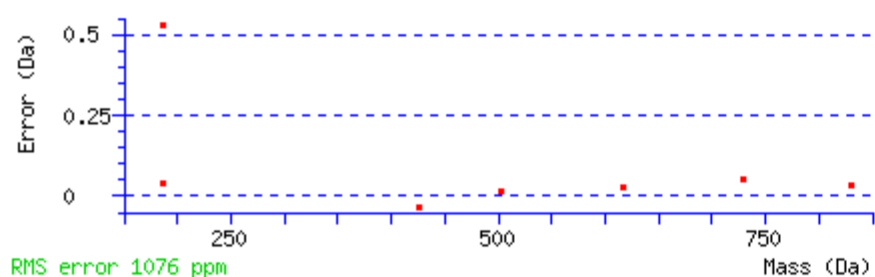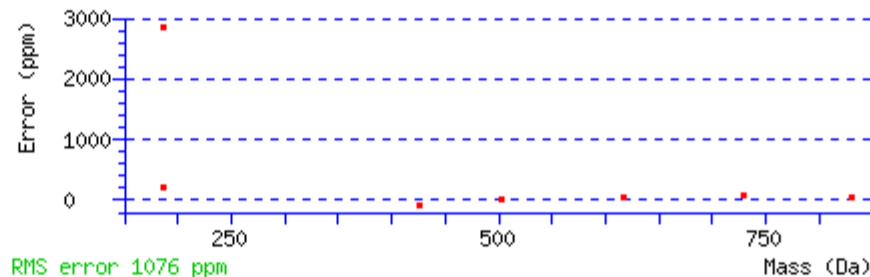

NCBI BLAST search of **LLPTLPPDKK**

(Parameters: blastp, nr protein database, expect=20000, no filter, PAM30)

Other BLAST [web gateways](#)

All matches to this query

| Score | Mr(calc):   | Delta     | Sequence                   |
|-------|-------------|-----------|----------------------------|
| 33.0  | 1152.675415 | 0.006993  | <a href="#">LLPTLPPDKK</a> |
| 2.3   | 1152.686615 | -0.004207 | <a href="#">LAKPKPNLEK</a> |

# {MATRIX} SCIENCE Mascot Search Results

## Peptide View

MS/MS Fragmentation of **RFLIHHENR**

Found in **ENHL\_HUMAN**, HERV-H\_2q24.3 provirus ancestral Env polyprotein OS=Homo sapiens PE=2 SV=1

Match to Query 32185: 1220.650868 from(611.332710,2+) rtinseconds(3788) index(53798)

Title: Locus:1.1.1.2762.9

Data file 2011-11-14 - TFD - EP 8-5.mgf

Click mouse within plot area to zoom in by factor of two about that point

Or, Plot from  to  Da

Label all possible matches  Label matches used for scoring

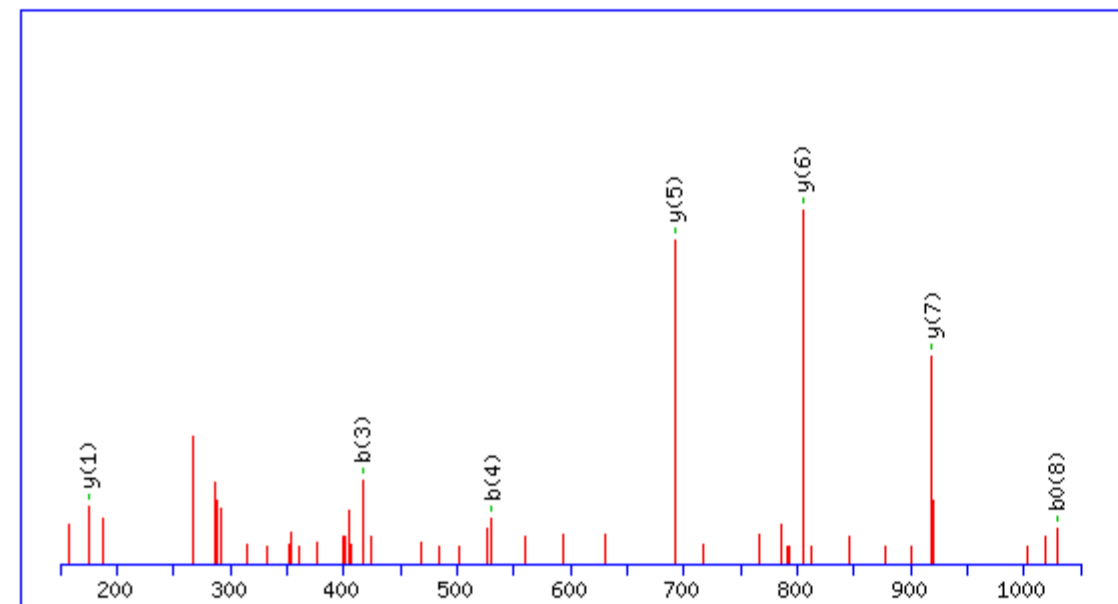

Monoisotopic mass of neutral peptide Mr(calc): 1220.652649

Fixed modifications: Propionamide (C) (apply to specified residues or termini only)

Ions Score: 32 Expect: 0.0067

Matches: 7/80 fragment ions using 9 most intense peaks [\(help\)](#)

| # | b                 | b <sup>++</sup> | b <sup>*</sup> | b <sup>*++</sup> | b <sup>0</sup>     | b <sup>0++</sup> | Seq. | y                 | y <sup>++</sup> | y <sup>*</sup> | y <sup>*++</sup> | y <sup>0</sup> | y <sup>0++</sup> | # |
|---|-------------------|-----------------|----------------|------------------|--------------------|------------------|------|-------------------|-----------------|----------------|------------------|----------------|------------------|---|
| 1 | 157.108387        | 79.057831       | 140.081838     | 70.544557        |                    |                  | R    |                   |                 |                |                  |                |                  | 9 |
| 2 | 304.176801        | 152.592039      | 287.150252     | 144.078764       |                    |                  | F    | 1065.558838       | 533.283057      | 1048.532289    | 524.769783       | 1047.548273    | 524.277775       | 8 |
| 3 | <b>417.260865</b> | 209.134071      | 400.234316     | 200.620796       |                    |                  | L    | <b>918.490424</b> | 459.748850      | 901.463875     | 451.235576       | 900.479859     | 450.743568       | 7 |
| 4 | <b>530.344929</b> | 265.676103      | 513.318380     | 257.162828       |                    |                  | I    | <b>805.406360</b> | 403.206818      | 788.379811     | 394.693544       | 787.395795     | 394.201536       | 6 |
| 5 | 667.403841        | 334.205559      | 650.377292     | 325.692284       |                    |                  | H    | <b>692.322296</b> | 346.664786      | 675.295747     | 338.151512       | 674.311731     | 337.659504       | 5 |
| 6 | 804.462753        | 402.735015      | 787.436204     | 394.221740       |                    |                  | H    | 555.263384        | 278.135330      | 538.236835     | 269.622056       | 537.252819     | 269.130048       | 4 |
| 7 | 933.505346        | 467.256311      | 916.478797     | 458.743037       | 915.494781         | 458.251029       | E    | 418.204472        | 209.605874      | 401.177923     | 201.092600       | 400.193907     | 200.600592       | 3 |
| 8 | 1047.548273       | 524.277775      | 1030.521724    | 515.764500       | <b>1029.537708</b> | 515.272492       | N    | 289.161879        | 145.084577      | 272.135330     | 136.571303       |                |                  | 2 |
| 9 |                   |                 |                |                  |                    |                  | R    | <b>175.118952</b> | 88.063114       | 158.092403     | 79.549839        |                |                  | 1 |

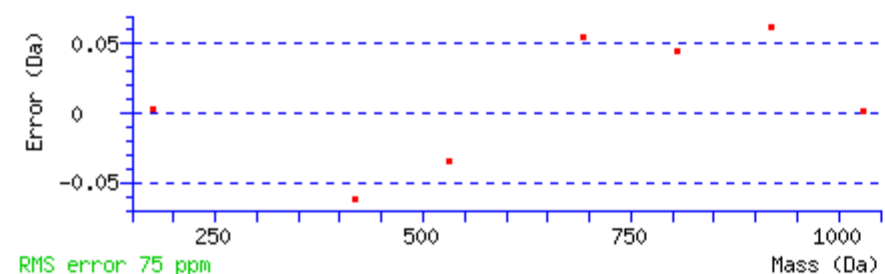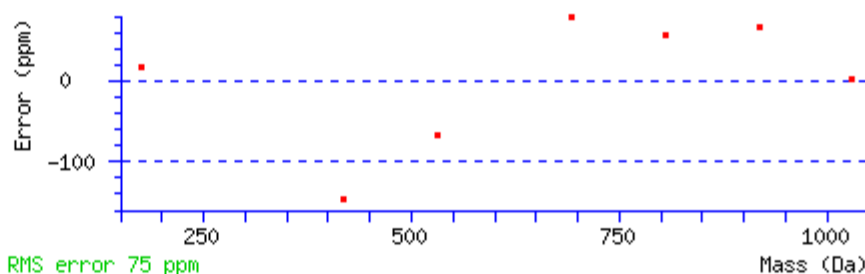

NCBI BLAST search of [RFLIHHENR](#)

(Parameters: blastp, nr protein database, expect=20000, no filter, PAM30)

Other BLAST [web gateways](#)

All matches to this query

| Score | Mr(calc):   | Delta     | Sequence                    |
|-------|-------------|-----------|-----------------------------|
| 32.5  | 1220.652649 | -0.001781 | <a href="#">RFLIHHENR</a>   |
| 27.6  | 1220.640076 | 0.010792  | <a href="#">ASSGLLYPLER</a> |
| 10.9  | 1220.640076 | 0.010792  | <a href="#">LFASADISLER</a> |
| 9.0   | 1220.640091 | 0.010777  | <a href="#">SDVDQLYLIR</a>  |
| 7.5   | 1220.662537 | -0.011669 | <a href="#">RESPSPAPKPR</a> |
| 5.1   | 1220.640091 | 0.010777  | <a href="#">SFDALLADLTR</a> |
| 1.3   | 1220.658707 | -0.007839 | <a href="#">CNKTLPIAFK</a>  |

# MATRIX SCIENCE Mascot Search Results

## Peptide View

MS/MS Fragmentation of **ERAMMTMVLSK**

Found in **ENKI\_HUMAN**, HERV-K\_12q14.1 provirus ancestral Env polyprotein OS=Homo sapiens PE=1 SV=1

Match to Query 41244: 1426.709568 from(714.362060,2+) rtinseconds(2482) index(28139)

Title: Locus:1.1.1.2585.42

Data file 2011-11-12 - TFD - EP 5-2.mgf

Click mouse within plot area to zoom in by factor of two about that point

Or, Plot from  to  Da

Label all possible matches  Label matches used for scoring

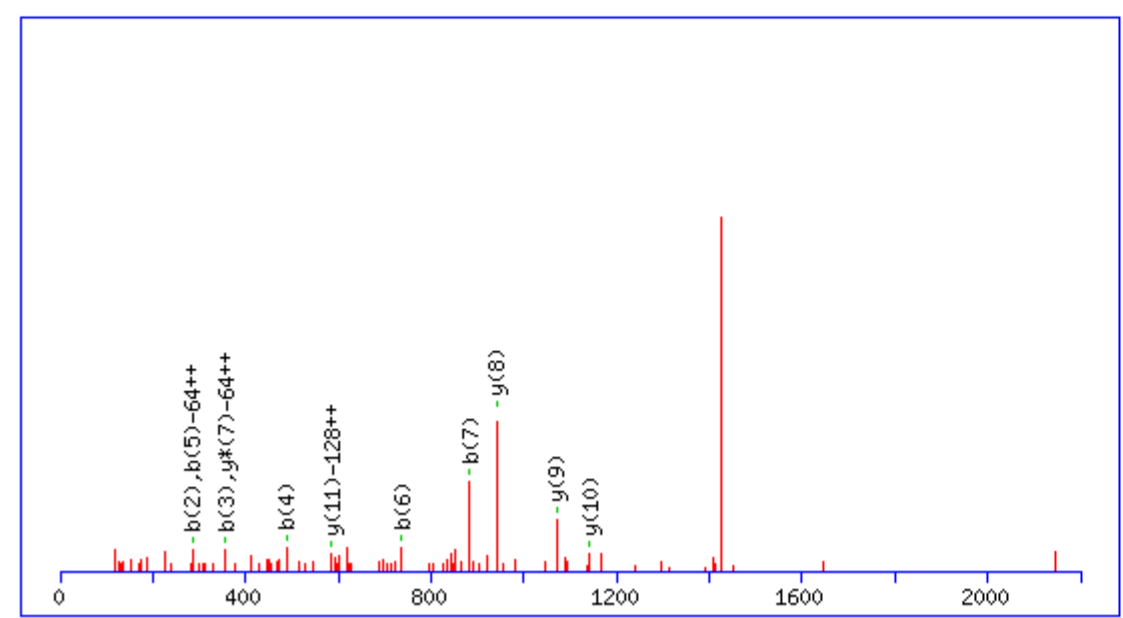

Monoisotopic mass of neutral peptide Mr(calc): 1426.698212

Fixed modifications: Propionamide (C) (apply to specified residues or termini only)

Variable modifications:

M5 : Oxidation (M), with neutral losses 0.000000 (shown in table), 63.998285

M7 : Oxidation (M), with neutral losses 0.000000 (shown in table), 63.998285

Ions Score: 35 Expect: 0.005

Matches : 11/206 fragment ions using 13 most intense peaks [\(help\)](#)

| #  | b                 | b <sup>++</sup> | b <sup>*</sup> | b <sup>*++</sup> | b <sup>0</sup> | b <sup>0++</sup> | Seq. | y                  | y <sup>++</sup> | y <sup>*</sup> | y <sup>*++</sup> | y <sup>0</sup> | y <sup>0++</sup> | #  |
|----|-------------------|-----------------|----------------|------------------|----------------|------------------|------|--------------------|-----------------|----------------|------------------|----------------|------------------|----|
| 1  | 130.049869        | 65.528572       |                |                  | 112.039304     | 56.523290        | E    |                    |                 |                |                  |                |                  | 12 |
| 2  | <b>286.150980</b> | 143.579128      | 269.124431     | 135.065854       | 268.140415     | 134.573846       | R    | 1298.662913        | 649.835094      | 1281.636364    | 641.321820       | 1280.652348    | 640.829812       | 11 |
| 3  | <b>357.188094</b> | 179.097685      | 340.161545     | 170.584411       | 339.177529     | 170.092403       | A    | <b>1142.561802</b> | 571.784539      | 1125.535253    | 563.271265       | 1124.551237    | 562.779256       | 10 |
| 4  | <b>488.228579</b> | 244.617928      | 471.202030     | 236.104653       | 470.218014     | 235.612645       | M    | <b>1071.524688</b> | 536.265982      | 1054.498139    | 527.752708       | 1053.514123    | 527.260699       | 9  |
| 5  | 635.263979        | 318.135628      | 618.237430     | 309.622353       | 617.253414     | 309.130345       | M    | <b>940.484203</b>  | 470.745740      | 923.457654     | 462.232465       | 922.473638     | 461.740457       | 8  |
| 6  | <b>736.311658</b> | 368.659467      | 719.285109     | 360.146193       | 718.301093     | 359.654185       | T    | 793.448803         | 397.228040      | 776.422254     | 388.714765       | 775.438238     | 388.222757       | 7  |
| 7  | <b>883.347058</b> | 442.177167      | 866.320509     | 433.663893       | 865.336493     | 433.171885       | M    | 692.401124         | 346.704200      | 675.374575     | 338.190925       | 674.390559     | 337.698917       | 6  |
| 8  | 982.415472        | 491.711374      | 965.388923     | 483.198100       | 964.404907     | 482.706092       | V    | 545.365724         | 273.186500      | 528.339175     | 264.673226       | 527.355159     | 264.181218       | 5  |
| 9  | 1081.483886       | 541.245581      | 1064.457337    | 532.732307       | 1063.473321    | 532.240298       | V    | 446.297310         | 223.652293      | 429.270761     | 215.139018       | 428.286745     | 214.647010       | 4  |
| 10 | 1194.567950       | 597.787613      | 1177.541401    | 589.274339       | 1176.557385    | 588.782330       | L    | 347.228896         | 174.118086      | 330.202347     | 165.604811       | 329.218331     | 165.112803       | 3  |
| 11 | 1281.599978       | 641.303627      | 1264.573429    | 632.790353       | 1263.589413    | 632.298344       | S    | 234.144832         | 117.576054      | 217.118283     | 109.062780       | 216.134267     | 108.570772       | 2  |
| 12 |                   |                 |                |                  |                |                  | K    | 147.112804         | 74.060040       | 130.086255     | 65.546765        |                |                  | 1  |

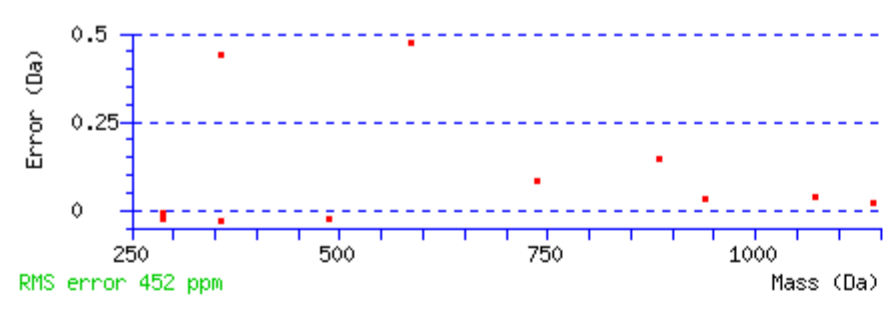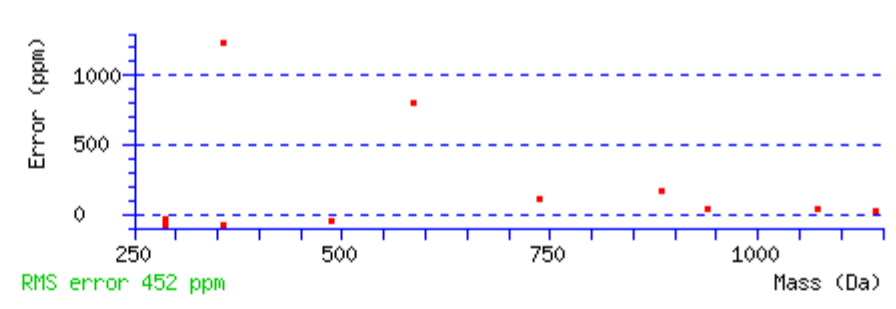

NCBI BLAST search of **ERAMMTMVLSK**

(Parameters: blastp, nr protein database, expect=20000, no filter, PAM30)

Other BLAST [web gateways](#)

## All matches to this query

| Score | Mr(calc):   | Delta    | Sequence                        |
|-------|-------------|----------|---------------------------------|
| 34.8  | 1426.698212 | 0.011356 | <a href="#">ERAMMTMVLSK</a>     |
| 32.0  | 1426.706070 | 0.003498 | <a href="#">MGPAMGPALGAGIER</a> |
| 18.5  | 1426.698212 | 0.011356 | <a href="#">ERAMMTMVLSK</a>     |
| 8.8   | 1426.698212 | 0.011356 | <a href="#">ERAMMTMVLSK</a>     |
| 3.6   | 1426.698700 | 0.010868 | <a href="#">SVEDGGMPGLGRPR</a>  |
| 1.9   | 1426.709244 | 0.000324 | <a href="#">GDAIYSAVYDVVR</a>   |



# Mascot Search Results

## Peptide View

MS/MS Fragmentation of **VFIGNLNTLVVK**

Found in **HNRCL\_HUMAN**, Heterogeneous nuclear ribonucleoprotein C-like 1 OS=Homo sapiens GN=HNRNPCL1 PE=1 SV=1

Match to Query 32880: 1315.786808 from(658.900680,2+) rtinseconds(3217) index(37858)

Title: Locus:1.1.1.2560.22

Data file 2011-11-12 - TFD - EP 6-7.mgf

Click mouse within plot area to zoom in by factor of two about that point

Or, Plot from  to  Da

Label all possible matches  Label matches used for scoring

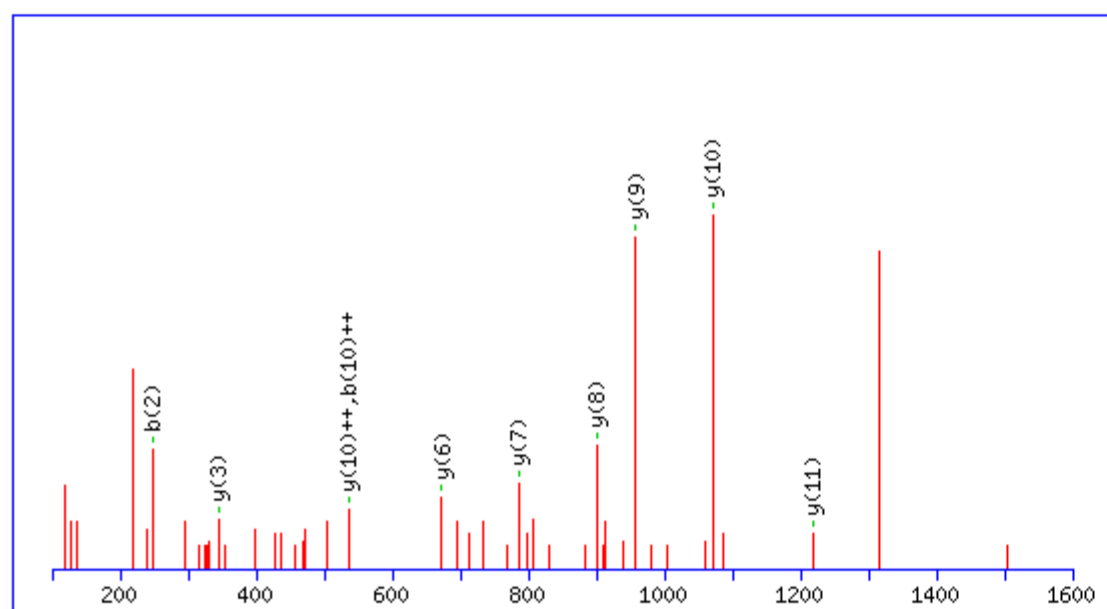

Monoisotopic mass of neutral peptide Mr(calc): 1315.786377

Fixed modifications: Propionamide (C) (apply to specified residues or termini only)

Ions Score: 55 Expect: 4.9e-006

Matches : 10/102 fragment ions using 11 most intense peaks ([help](#))

| #  | b                 | b <sup>++</sup>   | b*          | b <sup>+++</sup> | b <sup>0</sup> | b <sup>0++</sup> | Seq. | y                  | y <sup>++</sup>   | y*          | y <sup>+++</sup> | y <sup>0</sup> | y <sup>0++</sup> | #  |
|----|-------------------|-------------------|-------------|------------------|----------------|------------------|------|--------------------|-------------------|-------------|------------------|----------------|------------------|----|
| 1  | 100.075690        | 50.541483         |             |                  |                |                  | V    |                    |                   |             |                  |                |                  | 12 |
| 2  | <b>247.144104</b> | 124.075690        |             |                  |                |                  | F    | <b>1217.725235</b> | 609.366256        | 1200.698686 | 600.852981       | 1199.714670    | 600.360973       | 11 |
| 3  | 360.228168        | 180.617722        |             |                  |                |                  | I    | <b>1070.656821</b> | <b>535.832049</b> | 1053.630272 | 527.318774       | 1052.646256    | 526.826766       | 10 |
| 4  | 417.249632        | 209.128454        |             |                  |                |                  | G    | <b>957.572757</b>  | 479.290017        | 940.546208  | 470.776742       | 939.562192     | 470.284734       | 9  |
| 5  | 531.292559        | 266.149918        | 514.266010  | 257.636643       |                |                  | N    | <b>900.551293</b>  | 450.779285        | 883.524744  | 442.266010       | 882.540728     | 441.774002       | 8  |
| 6  | 644.376623        | 322.691950        | 627.350074  | 314.178675       |                |                  | L    | <b>786.508366</b>  | 393.757821        | 769.481817  | 385.244547       | 768.497801     | 384.752539       | 7  |
| 7  | 758.419550        | 379.713413        | 741.393001  | 371.200138       |                |                  | N    | <b>673.424302</b>  | 337.215789        | 656.397753  | 328.702515       | 655.413737     | 328.210507       | 6  |
| 8  | 859.467229        | 430.237253        | 842.440680  | 421.723978       | 841.456664     | 421.231970       | T    | 559.381375         | 280.194326        | 542.354826  | 271.681051       | 541.370810     | 271.189043       | 5  |
| 9  | 972.551293        | 486.779285        | 955.524744  | 478.266010       | 954.540728     | 477.774002       | L    | 458.333696         | 229.670486        | 441.307147  | 221.157212       |                |                  | 4  |
| 10 | 1071.619707       | <b>536.313492</b> | 1054.593158 | 527.800217       | 1053.609142    | 527.308209       | V    | <b>345.249632</b>  | 173.128454        | 328.223083  | 164.615180       |                |                  | 3  |
| 11 | 1170.688121       | 585.847699        | 1153.661572 | 577.334424       | 1152.677556    | 576.842416       | V    | 246.181218         | 123.594247        | 229.154669  | 115.080973       |                |                  | 2  |
| 12 |                   |                   |             |                  |                |                  | K    | 147.112804         | 74.060040         | 130.086255  | 65.546765        |                |                  | 1  |

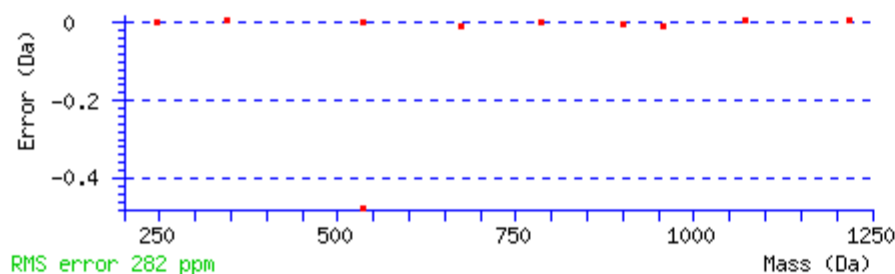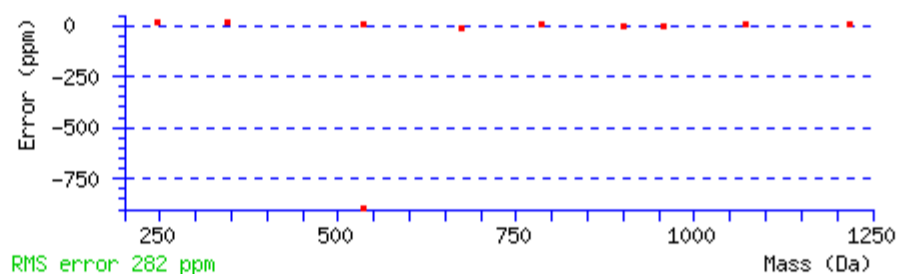

NCBI BLAST search of **VFIGNLNTLVVK**

(Parameters: blastp, nr protein database, expect=20000, no filter, PAM30)

Other BLAST [web gateways](#)

All matches to this query

| Score | Mr(calc):   | Delta    | Sequence                     |
|-------|-------------|----------|------------------------------|
| 54.6  | 1315.786377 | 0.000431 | <a href="#">VFIGNLNTLVVK</a> |

Mascot: <http://www.matrixscience.com/>

# MASCOT Search Results

## Peptide View

MS/MS Fragmentation of **AEPYCSVLPGFTFIQHLPLSER**

Found in **HNRL1\_HUMAN**, Heterogeneous nuclear ribonucleoprotein U-like protein 1 OS=Homo sapiens GN=HNRNPUL1 PE=1 SV=2

Match to Query 66639: 2574.300732 from(859.107520,3+) rtinseconds(4130) index(59944)

Title: Locus:1.1.1.3012.22

Data file 2011-11-14 - TFD - EP 7-2.mgf

Click mouse within plot area to zoom in by factor of two about that point

Or, Plot from  to  Da

Label all possible matches  Label matches used for scoring

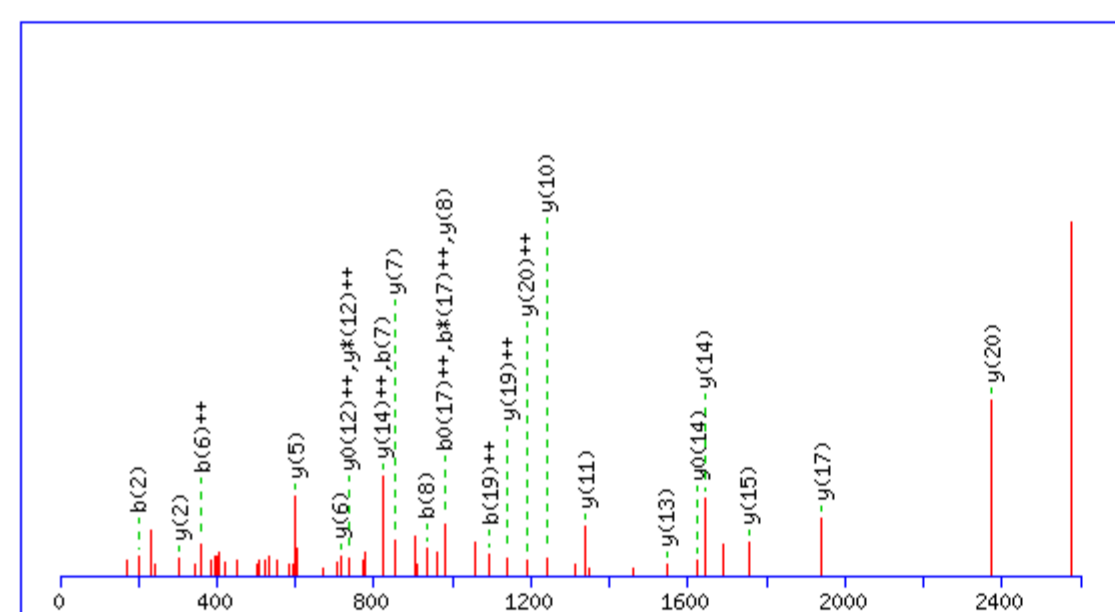

Monoisotopic mass of neutral peptide Mr(calc): 2574.294067

Fixed modifications: Propionamide (C) (apply to specified residues or termini only)

Ions Score: 82 Expect: 4.1e-008

Matches : 25/220 fragment ions using 32 most intense peaks [\(help\)](#)

| #  | b                 | b <sup>++</sup>    | b <sup>*</sup> | b <sup>+++</sup>  | b <sup>0</sup> | b <sup>0++</sup>  | Seq. | y                  | y <sup>++</sup>    | y <sup>*</sup> | y <sup>+++</sup>  | y <sup>0</sup>     | y <sup>0++</sup>  | #  |
|----|-------------------|--------------------|----------------|-------------------|----------------|-------------------|------|--------------------|--------------------|----------------|-------------------|--------------------|-------------------|----|
| 1  | 72.044390         | 36.525833          |                |                   |                |                   | A    |                    |                    |                |                   |                    |                   | 22 |
| 2  | <b>201.086983</b> | 101.047130         |                |                   | 183.076418     | 92.041847         | E    | 2504.264245        | 1252.635760        | 2487.237696    | 1244.122486       | 2486.253680        | 1243.630478       | 21 |
| 3  | 298.139747        | 149.573512         |                |                   | 280.129182     | 140.568229        | P    | <b>2375.221652</b> | <b>1188.114464</b> | 2358.195103    | 1179.601189       | 2357.211087        | 1179.109181       | 20 |
| 4  | 461.203076        | 231.105176         |                |                   | 443.192511     | 222.099894        | Y    | 2278.168888        | <b>1139.588082</b> | 2261.142339    | 1131.074807       | 2260.158323        | 1130.582799       | 19 |
| 5  | 635.249375        | 318.128326         |                |                   | 617.238810     | 309.123043        | C    | 2115.105559        | 1058.056417        | 2098.079010    | 1049.543143       | 2097.094994        | 1049.051135       | 18 |
| 6  | 722.281403        | <b>361.644340</b>  |                |                   | 704.270838     | 352.639057        | S    | <b>1941.059260</b> | 971.033268         | 1924.032711    | 962.519993        | 1923.048695        | 962.027985        | 17 |
| 7  | <b>821.349817</b> | 411.178547         |                |                   | 803.339252     | 402.173264        | V    | 1854.027232        | 927.517254         | 1837.000683    | 919.003979        | 1836.016667        | 918.511971        | 16 |
| 8  | <b>934.433881</b> | 467.720579         |                |                   | 916.423316     | 458.715296        | L    | <b>1754.958818</b> | 877.983047         | 1737.932269    | 869.469772        | 1736.948253        | 868.977764        | 15 |
| 9  | 1031.486645       | 516.246961         |                |                   | 1013.476080    | 507.241678        | P    | <b>1641.874754</b> | <b>821.441015</b>  | 1624.848205    | 812.927740        | <b>1623.864189</b> | 812.435732        | 14 |
| 10 | 1088.508109       | 544.757692         |                |                   | 1070.497544    | 535.752410        | G    | <b>1544.821990</b> | 772.914633         | 1527.795441    | 764.401359        | 1526.811425        | 763.909350        | 13 |
| 11 | 1235.576523       | 618.291900         |                |                   | 1217.565958    | 609.286617        | F    | 1487.800526        | 744.403901         | 1470.773977    | <b>735.890627</b> | 1469.789961        | <b>735.398619</b> | 12 |
| 12 | 1336.624202       | 668.815739         |                |                   | 1318.613637    | 659.810456        | T    | <b>1340.732112</b> | 670.869694         | 1323.705563    | 662.356420        | 1322.721547        | 661.864411        | 11 |
| 13 | 1483.692616       | 742.349946         |                |                   | 1465.682051    | 733.344664        | F    | <b>1239.684433</b> | 620.345854         | 1222.657884    | 611.832580        | 1221.673868        | 611.340572        | 10 |
| 14 | 1596.776680       | 798.891978         |                |                   | 1578.766115    | 789.886695        | I    | 1092.616019        | 546.811647         | 1075.589470    | 538.298373        | 1074.605454        | 537.806365        | 9  |
| 15 | 1724.835258       | 862.921267         | 1707.808709    | 854.407992        | 1706.824693    | 853.915984        | Q    | <b>979.531955</b>  | 490.269615         | 962.505406     | 481.756341        | 961.521390         | 481.264333        | 8  |
| 16 | 1861.894170       | 931.450723         | 1844.867621    | 922.937448        | 1843.883605    | 922.445440        | H    | <b>851.473377</b>  | 426.240327         | 834.446828     | 417.727052        | 833.462812         | 417.235044        | 7  |
| 17 | 1974.978234       | 987.992755         | 1957.951685    | <b>979.479480</b> | 1956.967669    | <b>978.987472</b> | L    | <b>714.414465</b>  | 357.710871         | 697.387916     | 349.197596        | 696.403900         | 348.705588        | 6  |
| 18 | 2072.030998       | 1036.519137        | 2055.004449    | 1028.005862       | 2054.020433    | 1027.513854       | P    | <b>601.330401</b>  | 301.168839         | 584.303852     | 292.655564        | 583.319836         | 292.163556        | 5  |
| 19 | 2185.115062       | <b>1093.061169</b> | 2168.088513    | 1084.547894       | 2167.104497    | 1084.055886       | L    | 504.277637         | 252.642457         | 487.251088     | 244.129182        | 486.267072         | 243.637174        | 4  |
| 20 | 2272.147090       | 1136.577183        | 2255.120541    | 1128.063908       | 2254.136525    | 1127.571900       | S    | 391.193573         | 196.100425         | 374.167024     | 187.587150        | 373.183008         | 187.095142        | 3  |
| 21 | 2401.189683       | 1201.098479        | 2384.163134    | 1192.585205       | 2383.179118    | 1192.093197       | E    | <b>304.161545</b>  | 152.584411         | 287.134996     | 144.071136        | 286.150980         | 143.579128        | 2  |
| 22 |                   |                    |                |                   |                |                   | R    | 175.118952         | 88.063114          | 158.092403     | 79.549839         |                    |                   | 1  |

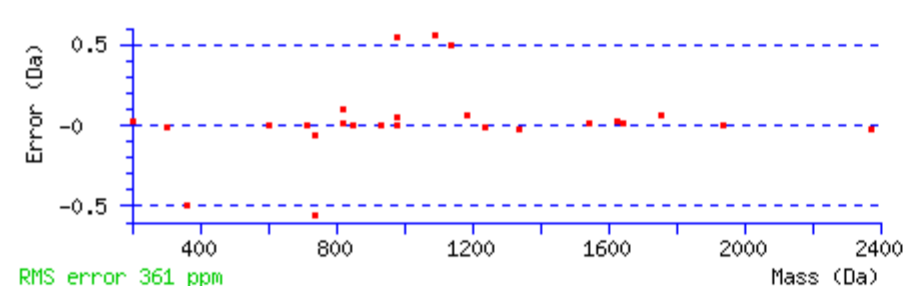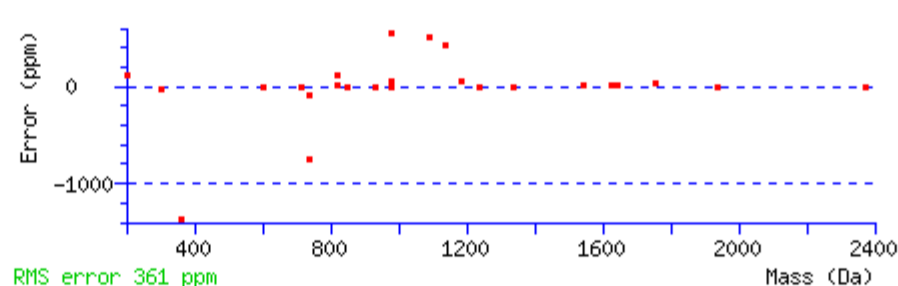

NCBI BLAST search of **AEPYCSVLPGFTFIQHLPLSER**

(Parameters: blastp, nr protein database, expect=20000, no filter, PAM30)

Other BLAST [web gateways](#)

All matches to this query

| Score | Mr(calc):   | Delta     | Sequence                                |
|-------|-------------|-----------|-----------------------------------------|
| 82.1  | 2574.294067 | 0.006665  | <a href="#">AEPYCSVLPGFTFIQHLPLSER</a>  |
| 3.2   | 2574.286194 | 0.014538  | <a href="#">LSPQEISYFQFPGELLMRMLK</a>   |
| 2.5   | 2574.286194 | 0.014538  | <a href="#">LSPQEISYFQFPGELLMRMLK</a>   |
| 1.5   | 2574.319748 | -0.019016 | <a href="#">GGACQTPTVGNRQPTLGIHARPR</a> |
| 0.1   | 2574.311157 | -0.010425 | <a href="#">LPMDLLVLEDEKHHGAQSAALQK</a> |

**Peptide View**

MS/MS Fragmentation of **LSAKPAPPKPEPKPR**

Found in **HMG3\_HUMAN**, High mobility group nucleosome-binding domain-containing protein 3 OS=Homo sapiens GN=HMG3 PE=1 SV=2

Match to Query 47639: 1611.944736 from(403.993460,4+) rtinseconds(862) index(871)

Title: Locus:1.1.1.1599.2

Data file 2011-11-14 - TFD - EP 8-6.mgf

Click mouse within plot area to zoom in by factor of two about that point

Or, Plot from  to  Da

Label all possible matches  Label matches used for scoring

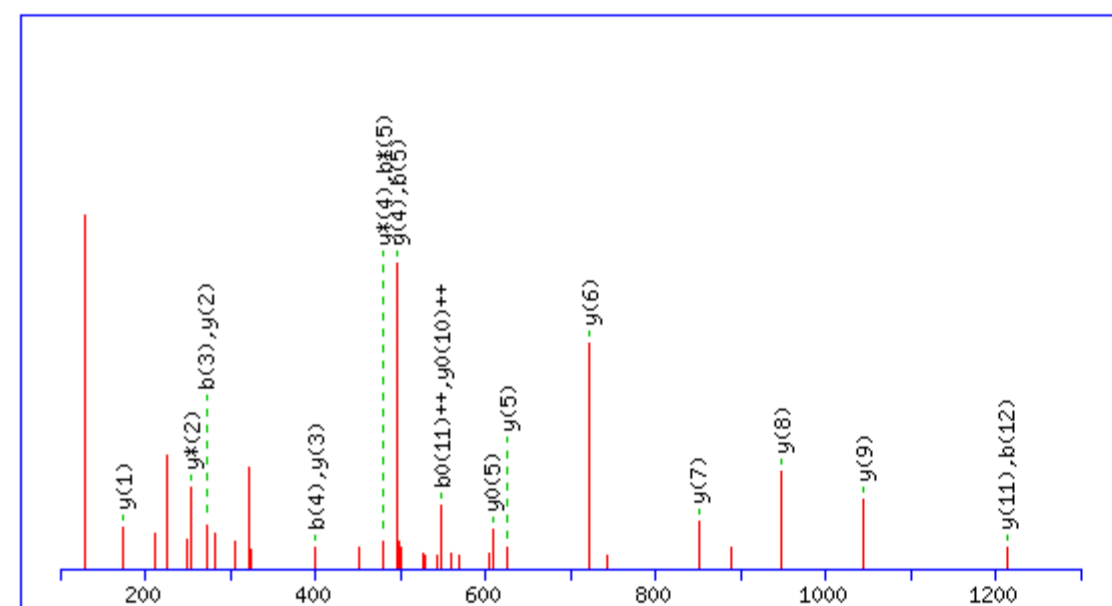

Monoisotopic mass of neutral peptide Mr(calc): 1611.946014

Fixed modifications: Propionamide (C) (apply to specified residues or termini only)

Ions Score: 83 Expect: 9.2e-009

Matches : 20/152 fragment ions using 20 most intense peaks [\(help\)](#)

| #  | b                  | b <sup>++</sup> | b <sup>*</sup>    | b <sup>*++</sup> | b <sup>0</sup> | b <sup>0++</sup>  | Seq. | y                  | y <sup>++</sup> | y <sup>*</sup>    | y <sup>*++</sup> | y <sup>0</sup>    | y <sup>0++</sup>  | #  |
|----|--------------------|-----------------|-------------------|------------------|----------------|-------------------|------|--------------------|-----------------|-------------------|------------------|-------------------|-------------------|----|
| 1  | 114.091340         | 57.549308       |                   |                  |                |                   | L    |                    |                 |                   |                  |                   |                   | 15 |
| 2  | 201.123368         | 101.065322      |                   |                  | 183.112803     | 92.060039         | S    | 1499.869274        | 750.438275      | 1482.842725       | 741.925001       | 1481.858709       | 741.432993        | 14 |
| 3  | <b>272.160482</b>  | 136.583879      |                   |                  | 254.149917     | 127.578596        | A    | 1412.837246        | 706.922261      | 1395.810697       | 698.408987       | 1394.826681       | 697.916979        | 13 |
| 4  | <b>400.255445</b>  | 200.631360      | 383.228896        | 192.118086       | 382.244880     | 191.626078        | K    | 1341.800132        | 671.403704      | 1324.773583       | 662.890430       | 1323.789567       | 662.398422        | 12 |
| 5  | <b>497.308209</b>  | 249.157742      | <b>480.281660</b> | 240.644468       | 479.297644     | 240.152460        | P    | <b>1213.705169</b> | 607.356223      | 1196.678620       | 598.842948       | 1195.694604       | 598.350940        | 11 |
| 6  | 568.345323         | 284.676300      | 551.318774        | 276.163025       | 550.334758     | 275.671017        | A    | 1116.652405        | 558.829841      | 1099.625856       | 550.316566       | 1098.641840       | <b>549.824558</b> | 10 |
| 7  | 665.398087         | 333.202682      | 648.371538        | 324.689407       | 647.387522     | 324.197399        | P    | <b>1045.615291</b> | 523.311284      | 1028.588742       | 514.798009       | 1027.604726       | 514.306001        | 9  |
| 8  | 762.450851         | 381.729064      | 745.424302        | 373.215789       | 744.440286     | 372.723781        | P    | <b>948.562527</b>  | 474.784902      | 931.535978        | 466.271627       | 930.551962        | 465.779619        | 8  |
| 9  | 890.545814         | 445.776545      | 873.519265        | 437.263271       | 872.535249     | 436.771263        | K    | <b>851.509763</b>  | 426.258520      | 834.483214        | 417.745245       | 833.499198        | 417.253237        | 7  |
| 10 | 987.598578         | 494.302927      | 970.572029        | 485.789653       | 969.588013     | 485.297645        | P    | <b>723.414800</b>  | 362.211038      | 706.388251        | 353.697764       | 705.404235        | 353.205756        | 6  |
| 11 | 1116.641171        | 558.824224      | 1099.614622       | 550.310949       | 1098.630606    | <b>549.818941</b> | E    | <b>626.362036</b>  | 313.684656      | 609.335487        | 305.171382       | <b>608.351471</b> | 304.679374        | 5  |
| 12 | <b>1213.693935</b> | 607.350606      | 1196.667386       | 598.837331       | 1195.683370    | 598.345323        | P    | <b>497.319443</b>  | 249.163359      | <b>480.292894</b> | 240.650085       |                   |                   | 4  |
| 13 | 1341.788898        | 671.398087      | 1324.762349       | 662.884813       | 1323.778333    | 662.392805        | K    | <b>400.266679</b>  | 200.636977      | 383.240130        | 192.123703       |                   |                   | 3  |
| 14 | 1438.841662        | 719.924469      | 1421.815113       | 711.411195       | 1420.831097    | 710.919187        | P    | <b>272.171716</b>  | 136.589496      | <b>255.145167</b> | 128.076221       |                   |                   | 2  |
| 15 |                    |                 |                   |                  |                |                   | R    | <b>175.118952</b>  | 88.063114       | 158.092403        | 79.549839        |                   |                   | 1  |

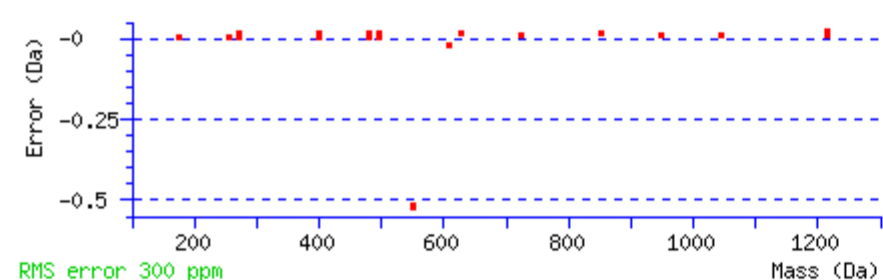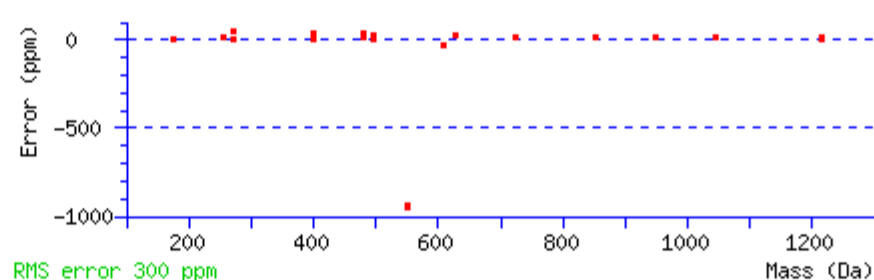

NCBI BLAST search of **LSAKPAPPKPEPKPR**

(Parameters: blastp, nr protein database, expect=20000, no filter, PAM30)

Other BLAST [web gateways](#)

All matches to this query

| Score | Mr(calc):   | Delta     | Sequence                        |
|-------|-------------|-----------|---------------------------------|
| 83.4  | 1611.946014 | -0.001278 | <a href="#">LSAKPAPPKPEPKPR</a> |
| 54.0  | 1611.946014 | -0.001278 | <a href="#">LSAKPAPPKPEPRPK</a> |

# MASCOT SCIENCE Mascot Search Results

## Peptide View

MS/MS Fragmentation of **YGEYFPGTGDLR**

Found in **HDAC1\_HUMAN**, Histone deacetylase 1 OS=Homo sapiens GN=HDAC1 PE=1 SV=1

Match to Query 38024: 1373.630788 from(687.822670,2+) rtinseconds(2598) index(34681)

Title: Locus:1.1.1.2408.36

Data file 2011-11-10 - TFD - EP 3-3.mgf

Click mouse within plot area to zoom in by factor of two about that point

Or, Plot from  to  Da

Label all possible matches  Label matches used for scoring

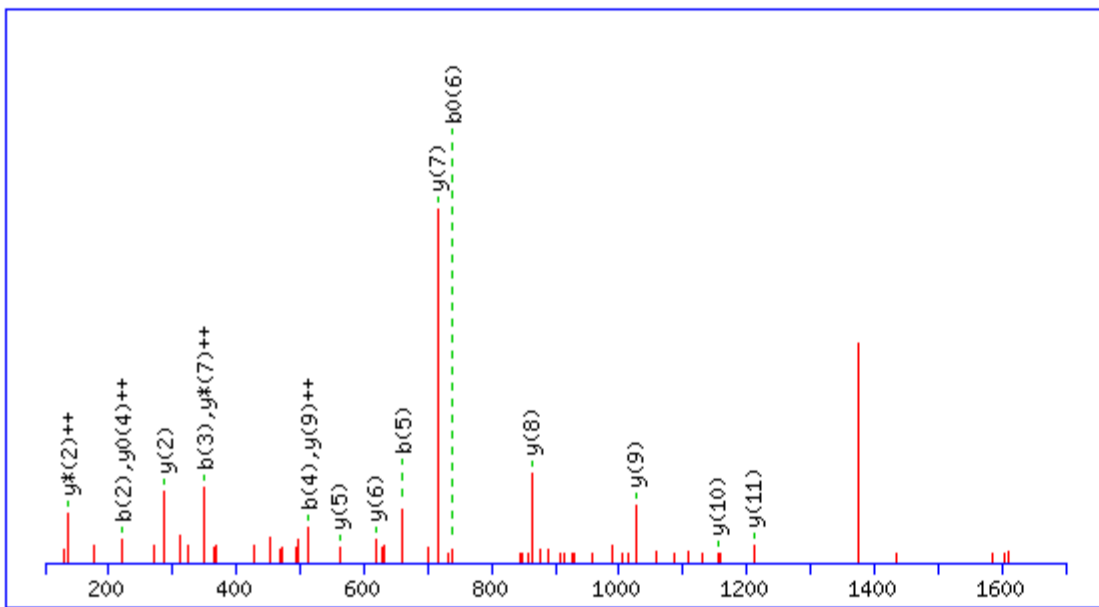

Monoisotopic mass of neutral peptide  $M_r(\text{calc})$ : 1373.625183

Fixed modifications: Propionamide (C) (apply to specified residues or termini only)

Ions Score: 59 Expect: 3.2e-006

Matches : 17/102 fragment ions using 22 most intense peaks [\(help\)](#)

| #  | b                 | b <sup>++</sup> | b <sup>0</sup>    | b <sup>0++</sup> | Seq. | y                  | y <sup>++</sup>   | y <sup>*</sup> | y <sup>*++</sup>  | y <sup>0</sup> | y <sup>0++</sup>  | #  |
|----|-------------------|-----------------|-------------------|------------------|------|--------------------|-------------------|----------------|-------------------|----------------|-------------------|----|
| 1  | 164.070605        | 82.538940       |                   |                  | Y    |                    |                   |                |                   |                |                   | 12 |
| 2  | <b>221.092069</b> | 111.049673      |                   |                  | G    | <b>1211.569130</b> | 606.288203        | 1194.542581    | 597.774928        | 1193.558565    | 597.282920        | 11 |
| 3  | <b>350.134662</b> | 175.570969      | 332.124097        | 166.565687       | E    | <b>1154.547666</b> | 577.777471        | 1137.521117    | 569.264197        | 1136.537101    | 568.772188        | 10 |
| 4  | <b>513.197991</b> | 257.102634      | 495.187426        | 248.097351       | Y    | <b>1025.505073</b> | <b>513.256175</b> | 1008.478524    | 504.742900        | 1007.494508    | 504.250892        | 9  |
| 5  | <b>660.266405</b> | 330.636841      | 642.255840        | 321.631558       | F    | <b>862.441744</b>  | 431.724510        | 845.415195     | 423.211235        | 844.431179     | 422.719227        | 8  |
| 6  | 757.319169        | 379.163223      | <b>739.308604</b> | 370.157940       | P    | <b>715.373330</b>  | 358.190303        | 698.346781     | <b>349.677029</b> | 697.362765     | 349.185021        | 7  |
| 7  | 814.340633        | 407.673955      | 796.330068        | 398.668672       | G    | <b>618.320566</b>  | 309.663921        | 601.294017     | 301.150646        | 600.310001     | 300.658639        | 6  |
| 8  | 915.388312        | 458.197794      | 897.377747        | 449.192512       | T    | <b>561.299102</b>  | 281.153189        | 544.272553     | 272.639914        | 543.288537     | 272.147906        | 5  |
| 9  | 972.409776        | 486.708526      | 954.399211        | 477.703244       | G    | 460.251423         | 230.629349        | 443.224874     | 222.116075        | 442.240858     | <b>221.624067</b> | 4  |
| 10 | 1087.436719       | 544.221998      | 1069.426154       | 535.216715       | D    | 403.229959         | 202.118617        | 386.203410     | 193.605343        | 385.219394     | 193.113335        | 3  |
| 11 | 1200.520783       | 600.764029      | 1182.510218       | 591.758747       | L    | <b>288.203016</b>  | 144.605146        | 271.176467     | <b>136.091871</b> |                |                   | 2  |
| 12 |                   |                 |                   |                  | R    | 175.118952         | 88.063114         | 158.092403     | 79.549839         |                |                   | 1  |

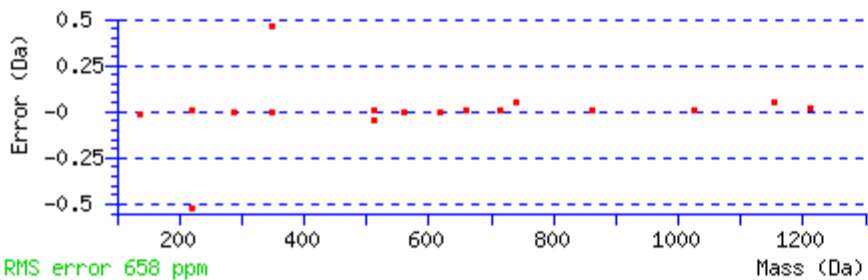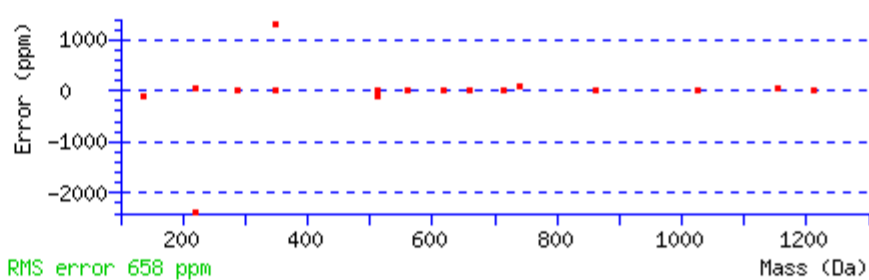

NCBI BLAST search of [YGEYFPGTGDLR](#)

(Parameters: blastp, nr protein database, expect=20000, no filter, PAM30)

Other BLAST [web gateways](#)

All matches to this query

| Score | $M_r(\text{calc})$ : | Delta    | Sequence                     |
|-------|----------------------|----------|------------------------------|
| 59.2  | 1373.625183          | 0.005605 | <a href="#">YGEYFPGTGDLR</a> |
| 0.6   | 1373.624527          | 0.006261 | <a href="#">MPDHDSTALLSR</a> |

# MASCOT SCIENCE Mascot Search Results

## Peptide View

MS/MS Fragmentation of **ALAAAGYDVEK**

Found in **H11\_HUMAN**, Histone H1.1 OS=Homo sapiens GN=HIST1H1A PE=1 SV=3

Match to Query 15263: 1106.565888 from(554.290220,2+) rtinseconds(1743) index(5423)

Title: Locus:1.1.1.2320.26

Data file 2011-11-13 - TFD - EP 7-8.mgf

Click mouse within plot area to zoom in by factor of two about that point

Or, Plot from  to  Da

Label all possible matches  Label matches used for scoring

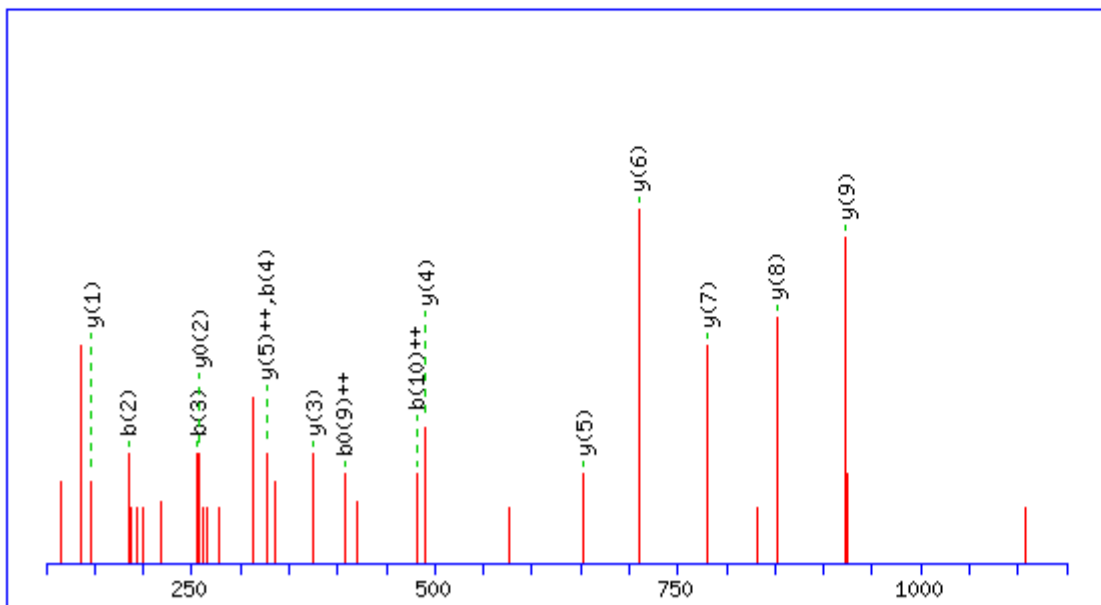

Monoisotopic mass of neutral peptide Mr(calc): 1106.560760

Fixed modifications: Propionamide (C) (apply to specified residues or termini only)

Ions Score: 59 Expect: 1.2e-005

Matches: 15/84 fragment ions using 23 most intense peaks [\(help\)](#)

| #  | b                 | b <sup>++</sup>   | b <sup>0</sup> | b <sup>0++</sup>  | Seq. | y                 | y <sup>++</sup>   | y <sup>*</sup> | y <sup>*++</sup> | y <sup>0</sup>    | y <sup>0++</sup> | #  |
|----|-------------------|-------------------|----------------|-------------------|------|-------------------|-------------------|----------------|------------------|-------------------|------------------|----|
| 1  | 72.044390         | 36.525833         |                |                   | A    |                   |                   |                |                  |                   |                  | 11 |
| 2  | <b>185.128454</b> | 93.067865         |                |                   | L    | 1036.530953       | 518.769115        | 1019.504404    | 510.255840       | 1018.520388       | 509.763832       | 10 |
| 3  | <b>256.165568</b> | 128.586422        |                |                   | A    | <b>923.446889</b> | 462.227082        | 906.420340     | 453.713808       | 905.436324        | 453.221800       | 9  |
| 4  | <b>327.202682</b> | 164.104979        |                |                   | A    | <b>852.409775</b> | 426.708526        | 835.383226     | 418.195251       | 834.399210        | 417.703243       | 8  |
| 5  | 398.239796        | 199.623536        |                |                   | A    | <b>781.372661</b> | 391.189968        | 764.346112     | 382.676694       | 763.362096        | 382.184686       | 7  |
| 6  | 455.261260        | 228.134268        |                |                   | G    | <b>710.335547</b> | 355.671411        | 693.308998     | 347.158137       | 692.324982        | 346.666129       | 6  |
| 7  | 618.324589        | 309.665933        |                |                   | Y    | <b>653.314083</b> | <b>327.160680</b> | 636.287534     | 318.647405       | 635.303518        | 318.155397       | 5  |
| 8  | 733.351532        | 367.179404        | 715.340967     | 358.174122        | D    | <b>490.250754</b> | 245.629015        | 473.224205     | 237.115740       | 472.240189        | 236.623732       | 4  |
| 9  | 832.419946        | 416.713611        | 814.409381     | <b>407.708328</b> | V    | <b>375.223811</b> | 188.115543        | 358.197262     | 179.602269       | 357.213246        | 179.110261       | 3  |
| 10 | 961.462539        | <b>481.234908</b> | 943.451974     | 472.229625        | E    | 276.155397        | 138.581336        | 259.128848     | 130.068062       | <b>258.144832</b> | 129.576054       | 2  |
| 11 |                   |                   |                |                   | K    | <b>147.112804</b> | 74.060040         | 130.086255     | 65.546765        |                   |                  | 1  |

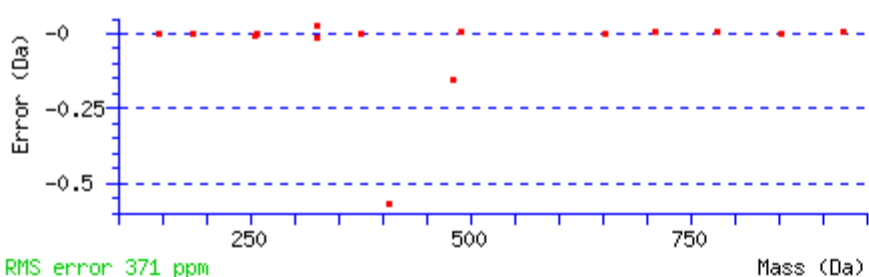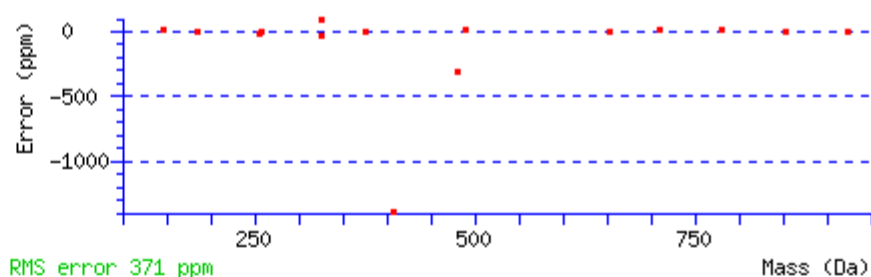

NCBI BLAST search of [ALAAAGYDVEK](#)

(Parameters: blastp, nr protein database, expect=20000, no filter, PAM30)

Other BLAST [web gateways](#)

## All matches to this query

| Score | Mr(calc):   | Delta     | Sequence                    |
|-------|-------------|-----------|-----------------------------|
| 58.9  | 1106.560760 | 0.005128  | <a href="#">ALAAAGYDVEK</a> |
| 6.1   | 1106.560776 | 0.005112  | <a href="#">NVLQFTEEK</a>   |
| 5.6   | 1106.572006 | -0.006118 | <a href="#">NRDEVSEFIK</a>  |
| 3.6   | 1106.564148 | 0.001740  | <a href="#">TMIQKDLDK</a>   |
| 3.3   | 1106.572006 | -0.006118 | <a href="#">RVINDPSYK</a>   |
| 2.9   | 1106.560806 | 0.005082  | <a href="#">IGVVGGSDFEK</a> |
| 2.4   | 1106.560776 | 0.005112  | <a href="#">LTNAEGVEFK</a>  |

Mascot: <http://www.matrixscience.com/>

# **MATRIX** SCIENCE Mascot Search Results

## Peptide View

MS/MS Fragmentation of **AGLQFPVGR**

Found in **H2A1A\_HUMAN**, Histone H2A type 1-A OS=Homo sapiens GN=HIST1H2AA PE=1 SV=3

Match to Query 8651: 943.524448 from(472.769500,2+) rtinseconds(2398) index(9203)

Title: Locus:1.1.1.2527.5

Data file 2011-11-10 - TFD - EP 4-8.mgf

Click mouse within plot area to zoom in by factor of two about that point

Or, Plot from  to  Da

Label all possible matches  Label matches used for scoring

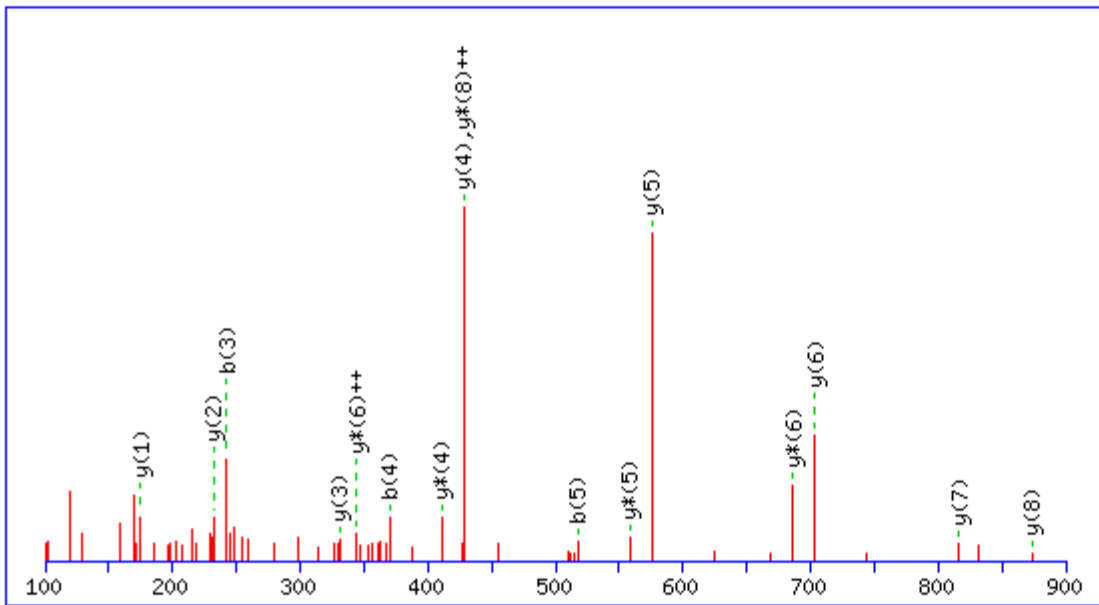

Monoisotopic mass of neutral peptide Mr(calc): 943.523956

Fixed modifications: Propionamide (C) (apply to specified residues or termini only)

Ions Score: 72 Expect: 1e-006

Matches : 16/58 fragment ions using 23 most intense peaks [\(help\)](#)

| # | b          | b <sup>++</sup> | b <sup>*</sup> | b <sup>*++</sup> | Seq. | y          | y <sup>++</sup> | y <sup>*</sup> | y <sup>*++</sup> | # |
|---|------------|-----------------|----------------|------------------|------|------------|-----------------|----------------|------------------|---|
| 1 | 72.044390  | 36.525833       |                |                  | A    |            |                 |                |                  | 9 |
| 2 | 129.065854 | 65.036565       |                |                  | G    | 873.494114 | 437.250695      | 856.467565     | 428.737421       | 8 |
| 3 | 242.149918 | 121.578597      |                |                  | L    | 816.472650 | 408.739963      | 799.446101     | 400.226689       | 7 |
| 4 | 370.208496 | 185.607886      | 353.181947     | 177.094612       | Q    | 703.388586 | 352.197931      | 686.362037     | 343.684657       | 6 |
| 5 | 517.276910 | 259.142093      | 500.250361     | 250.628819       | F    | 575.330008 | 288.168642      | 558.303459     | 279.655368       | 5 |
| 6 | 614.329674 | 307.668475      | 597.303125     | 299.155201       | P    | 428.261594 | 214.634435      | 411.235045     | 206.121160       | 4 |
| 7 | 713.398088 | 357.202682      | 696.371539     | 348.689408       | V    | 331.208830 | 166.108053      | 314.182281     | 157.594778       | 3 |
| 8 | 770.419552 | 385.713414      | 753.393003     | 377.200140       | G    | 232.140416 | 116.573846      | 215.113867     | 108.060571       | 2 |
| 9 |            |                 |                |                  | R    | 175.118952 | 88.063114       | 158.092403     | 79.549839        | 1 |

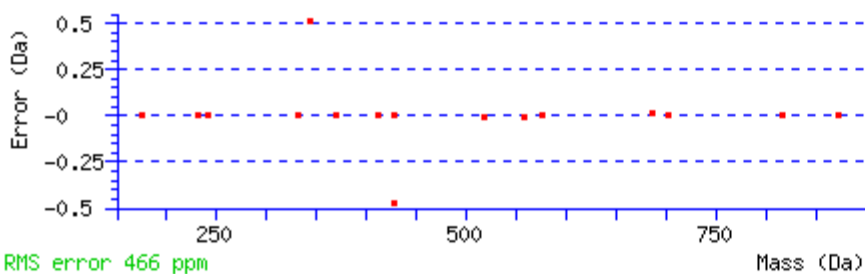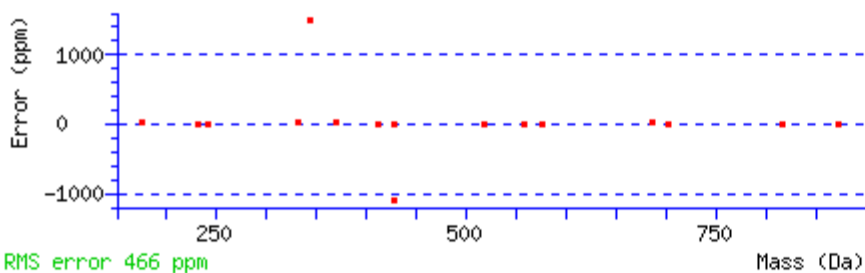

NCBI BLAST search of [AGLQFPVGR](#)

(Parameters: blastp, nr protein database, expect=20000, no filter, PAM30)

Other BLAST [web gateways](#)

## All matches to this query

| Score | Mr(calc):  | Delta     | Sequence                  |
|-------|------------|-----------|---------------------------|
| 72.2  | 943.523956 | 0.000492  | <a href="#">AGLQFPVGR</a> |
| 18.7  | 943.523926 | 0.000522  | <a href="#">KIQNQWK</a>   |
| 18.7  | 943.533813 | -0.009365 | <a href="#">QLKGLEEK</a>  |
| 16.0  | 943.533829 | -0.009381 | <a href="#">KTPQELK</a>   |
| 12.9  | 943.533829 | -0.009381 | <a href="#">LQKSPVEK</a>  |
| 12.0  | 943.527298 | -0.002850 | <a href="#">AGLLGLCAR</a> |
| 11.4  | 943.533813 | -0.009365 | <a href="#">KLGELQEK</a>  |
| 10.3  | 943.519913 | 0.004535  | <a href="#">QLSRDIGR</a>  |
| 10.0  | 943.533829 | -0.009381 | <a href="#">KIPVENTK</a>  |
| 8.6   | 943.519913 | 0.004535  | <a href="#">QIRQGNTK</a>  |

# MASCOT SCIENCE Mascot Search Results

## Peptide View

MS/MS Fragmentation of **LLLPGELAK**

Found in **H2B1A\_HUMAN**, Histone H2B type 1-A OS=Homo sapiens GN=HIST1H2BA PE=1 SV=3

Match to Query 9083: 952.597768 from(477.306160,2+) rtinseconds(2621) index(9806)

Title: Locus:1.1.1.2611.5

Data file 2011-11-10 - TFD - EP 4-8.mgf

Click mouse within plot area to zoom in by factor of two about that point

Or, Plot from  to  Da

Label all possible matches  Label matches used for scoring

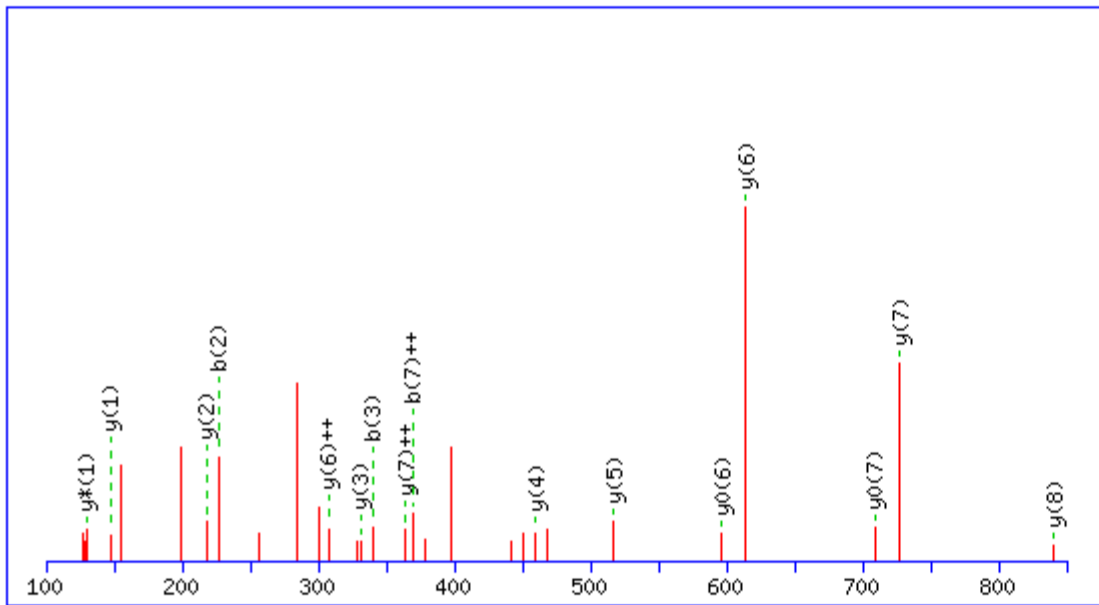

Monoisotopic mass of neutral peptide  $M_r(\text{calc})$ : 952.595688

Fixed modifications: Propionamide (C) (apply to specified residues or termini only)

Ions Score: 61 Expect: 1.9e-006

Matches : 16/64 fragment ions using 29 most intense peaks [\(help\)](#)

| # | b                 | b <sup>++</sup>   | b <sup>0</sup> | b <sup>0++</sup> | Seq. | y                 | y <sup>++</sup>   | y <sup>*</sup>    | y <sup>+++</sup> | y <sup>0</sup>    | y <sup>0++</sup> | # |
|---|-------------------|-------------------|----------------|------------------|------|-------------------|-------------------|-------------------|------------------|-------------------|------------------|---|
| 1 | 114.091340        | 57.549308         |                |                  | L    |                   |                   |                   |                  |                   |                  | 9 |
| 2 | <b>227.175404</b> | 114.091340        |                |                  | L    | <b>840.518931</b> | 420.763104        | 823.492382        | 412.249829       | 822.508366        | 411.757821       | 8 |
| 3 | <b>340.259468</b> | 170.633372        |                |                  | L    | <b>727.434867</b> | <b>364.221072</b> | 710.408318        | 355.707797       | <b>709.424302</b> | 355.215789       | 7 |
| 4 | 437.312232        | 219.159754        |                |                  | P    | <b>614.350803</b> | <b>307.679040</b> | 597.324254        | 299.165765       | <b>596.340238</b> | 298.673757       | 6 |
| 5 | 494.333696        | 247.670486        |                |                  | G    | <b>517.298039</b> | 259.152658        | 500.271490        | 250.639383       | 499.287474        | 250.147375       | 5 |
| 6 | 623.376289        | 312.191783        | 605.365724     | 303.186500       | E    | <b>460.276575</b> | 230.641926        | 443.250026        | 222.128651       | 442.266010        | 221.636643       | 4 |
| 7 | 736.460353        | <b>368.733815</b> | 718.449788     | 359.728532       | L    | <b>331.233982</b> | 166.120629        | 314.207433        | 157.607354       |                   |                  | 3 |
| 8 | 807.497467        | 404.252372        | 789.486902     | 395.247089       | A    | <b>218.149918</b> | 109.578597        | 201.123369        | 101.065322       |                   |                  | 2 |
| 9 |                   |                   |                |                  | K    | <b>147.112804</b> | 74.060040         | <b>130.086255</b> | 65.546765        |                   |                  | 1 |

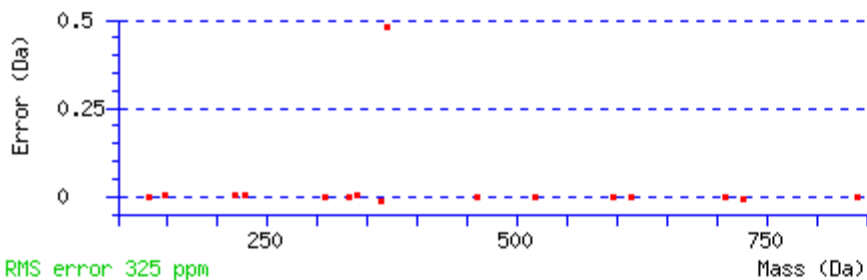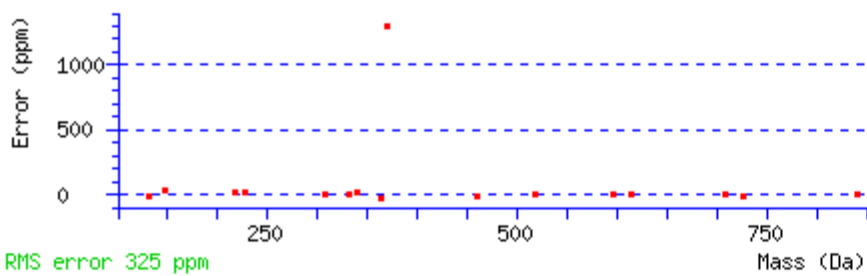

NCBI BLAST search of **LLLPGELAK**

(Parameters: blastp, nr protein database, expect=20000, no filter, PAM30)

Other BLAST [web gateways](#)

## All matches to this query

| Score | $M_r(\text{calc})$ : | Delta     | Sequence                  |
|-------|----------------------|-----------|---------------------------|
| 61.1  | 952.595688           | 0.002080  | <a href="#">LLLPGELAK</a> |
| 30.8  | 952.595688           | 0.002080  | <a href="#">IIPEIQK</a>   |
| 25.2  | 952.606918           | -0.009150 | <a href="#">LILPNKQK</a>  |
| 22.8  | 952.597031           | 0.000737  | <a href="#">LLIPRWR</a>   |
| 22.0  | 952.606934           | -0.009166 | <a href="#">LLLGATLPR</a> |
| 20.5  | 952.595703           | 0.002065  | <a href="#">ILGILPPSK</a> |
| 19.2  | 952.606934           | -0.009166 | <a href="#">EPLKVVLR</a>  |
| 19.1  | 952.595688           | 0.002080  | <a href="#">LLLEAGPK</a>  |
| 18.3  | 952.595688           | 0.002080  | <a href="#">LLIKEPPK</a>  |
| 17.4  | 952.595688           | 0.002080  | <a href="#">LLIKEPPK</a>  |

# MASCOT SEARCH RESULTS

## Peptide View

### MS/MS Fragmentation of STELLIR

Found in **H3IT\_HUMAN**, Histone H3.1t OS=Homo sapiens GN=HIST3H3 PE=1 SV=3

Match to Query 2823: 830.491748 from(416.253150,2+) rtinseconds(1888) index(19168)

Title: Locus:1.1.1.2041.5

Data file 2011-11-14 - TFD - EP 8-5.mgf

Click mouse within plot area to zoom in by factor of two about that point

Or, Plot from  to  Da

Label all possible matches  Label matches used for scoring

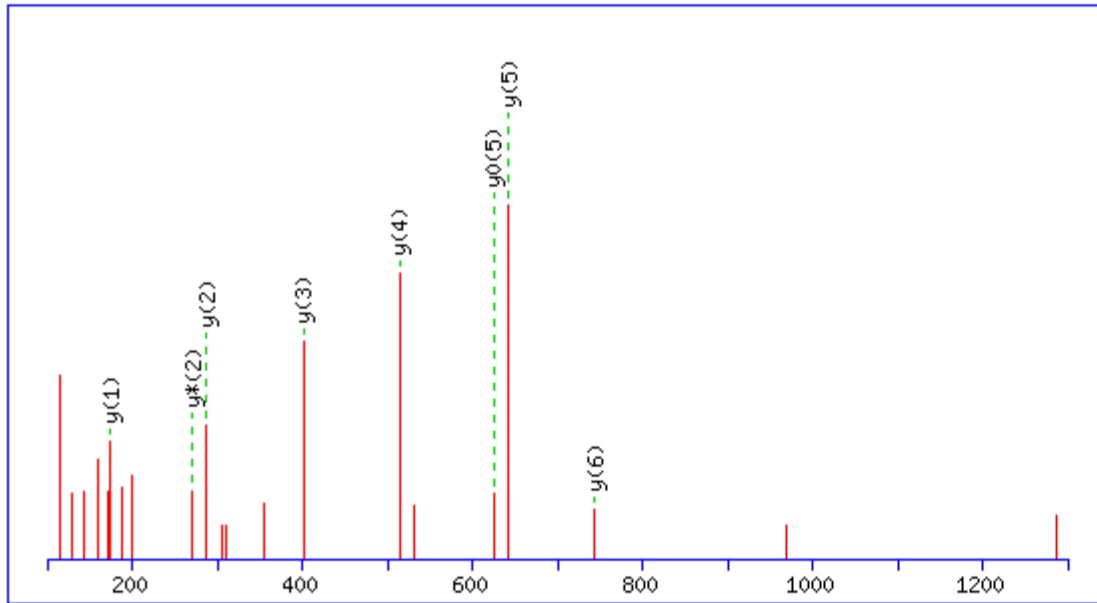

Monoisotopic mass of neutral peptide Mr(calc): 830.486145

Fixed modifications: Propionamide (C) (apply to specified residues or termini only)

Ions Score: 55 Expect: 3e-005

Matches : 8/52 fragment ions using 11 most intense peaks [\(help\)](#)

| # | b          | b <sup>++</sup> | b <sup>0</sup> | b <sup>0++</sup> | Seq. | y          | y <sup>++</sup> | y <sup>*</sup> | y <sup>*++</sup> | y <sup>0</sup> | y <sup>0++</sup> | # |
|---|------------|-----------------|----------------|------------------|------|------------|-----------------|----------------|------------------|----------------|------------------|---|
| 1 | 88.039304  | 44.523290       | 70.028739      | 35.518008        | S    |            |                 |                |                  |                |                  | 7 |
| 2 | 189.086983 | 95.047129       | 171.076418     | 86.041847        | T    | 744.461416 | 372.734346      | 727.434867     | 364.221072       | 726.450851     | 363.729064       | 6 |
| 3 | 318.129576 | 159.568426      | 300.119011     | 150.563144       | E    | 643.413737 | 322.210507      | 626.387188     | 313.697232       | 625.403172     | 313.205224       | 5 |
| 4 | 431.213640 | 216.110458      | 413.203075     | 207.105176       | L    | 514.371144 | 257.689210      | 497.344595     | 249.175936       |                |                  | 4 |
| 5 | 544.297704 | 272.652490      | 526.287139     | 263.647208       | L    | 401.287080 | 201.147178      | 384.260531     | 192.633904       |                |                  | 3 |
| 6 | 657.381768 | 329.194522      | 639.371203     | 320.189240       | I    | 288.203016 | 144.605146      | 271.176467     | 136.091872       |                |                  | 2 |
| 7 |            |                 |                |                  | R    | 175.118952 | 88.063114       | 158.092403     | 79.549840        |                |                  | 1 |

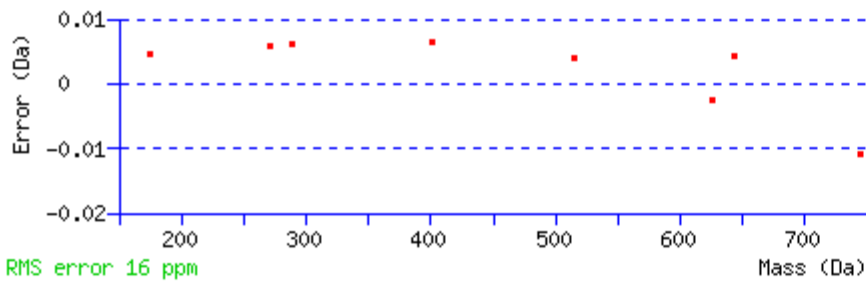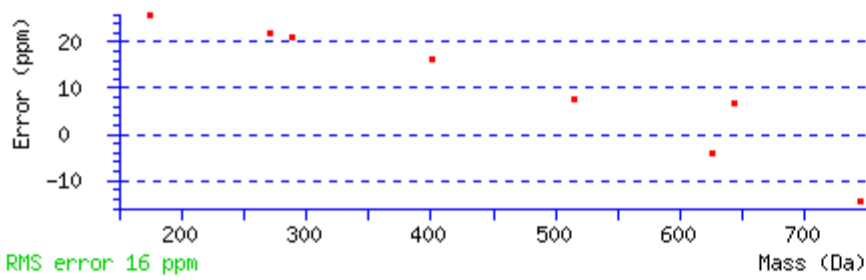

### NCBI BLAST search of STELLIR

(Parameters: blastp, nr protein database, expect=20000, no filter, PAM30)

Other BLAST [web gateways](#)

### All matches to this query

| Score | Mr(calc):  | Delta     | Sequence                 |
|-------|------------|-----------|--------------------------|
| 55.0  | 830.486145 | 0.005603  | <a href="#">STELLIR</a>  |
| 10.8  | 830.486145 | 0.005603  | <a href="#">TELSLLR</a>  |
| 9.5   | 830.486145 | 0.005603  | <a href="#">ESLTLLR</a>  |
| 9.5   | 830.487503 | 0.004245  | <a href="#">HVGHLLR</a>  |
| 9.5   | 830.497375 | -0.005627 | <a href="#">KSNTLLR</a>  |
| 9.5   | 830.498718 | -0.006970 | <a href="#">RHHLIR</a>   |
| 8.3   | 830.497391 | -0.005643 | <a href="#">AGTSVKLR</a> |
| 7.9   | 830.497375 | -0.005627 | <a href="#">SKLSQLR</a>  |
| 7.6   | 830.497391 | -0.005643 | <a href="#">SVAKTLGR</a> |
| 5.6   | 830.486160 | 0.005588  | <a href="#">STAPVKTK</a> |



# MASCOT SCIENCE Mascot Search Results

## Peptide View

MS/MS Fragmentation of **YGCDVGPDGR**

Found in **1A01\_HUMAN**, HLA class I histocompatibility antigen, A-1 alpha chain OS=Homo sapiens GN=HLA-A PE=1 SV=1

Match to Query 387291: 1094.443468 from(548.229010,2+) rtinseconds(1141) index(414283)

Title: Locus:1.1.1.770.31

Data file C:\Program Files (x86)\Matrix Science\Mascot Daemon\mgf3 TFD - Epitel - R2\mascot\_daemon\_merge.mgf

Click mouse within plot area to zoom in by factor of two about that point

Or, Plot from  to  Da

Label all possible matches  Label matches used for scoring

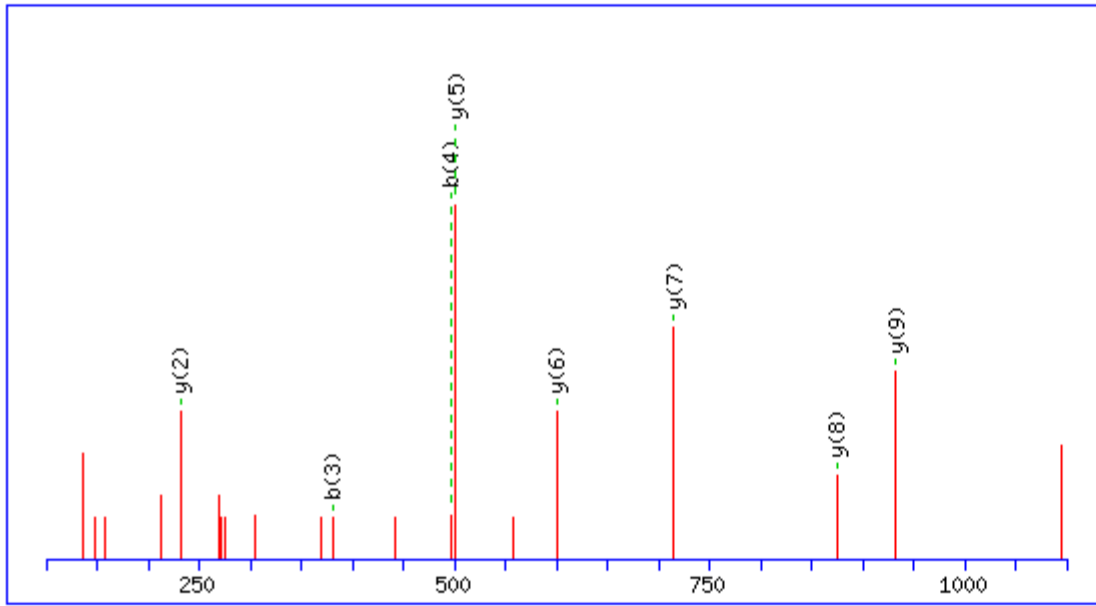

Monoisotopic mass of neutral peptide Mr(calc): 1094.445129

Fixed modifications: Carbamidomethyl (C) (apply to specified residues or termini only)

Ions Score: 46 Expect: 0.00014

Matches : 8/80 fragment ions using 13 most intense peaks ([help](#))

| #  | b                 | b <sup>++</sup> | b <sup>0</sup> | b <sup>0++</sup> | Seq. | y                 | y <sup>++</sup> | y <sup>*</sup> | y <sup>*++</sup> | y <sup>0</sup> | y <sup>0++</sup> | #  |
|----|-------------------|-----------------|----------------|------------------|------|-------------------|-----------------|----------------|------------------|----------------|------------------|----|
| 1  | 164.070605        | 82.538940       |                |                  | Y    |                   |                 |                |                  |                |                  | 10 |
| 2  | 221.092069        | 111.049673      |                |                  | G    | <b>932.389057</b> | 466.698167      | 915.362508     | 458.184892       | 914.378492     | 457.692884       | 9  |
| 3  | <b>381.122718</b> | 191.064997      |                |                  | C    | <b>875.367593</b> | 438.187435      | 858.341044     | 429.674160       | 857.357028     | 429.182152       | 8  |
| 4  | <b>496.149661</b> | 248.578469      | 478.139096     | 239.573186       | D    | <b>715.336944</b> | 358.172110      | 698.310395     | 349.658836       | 697.326379     | 349.166828       | 7  |
| 5  | 595.218075        | 298.112676      | 577.207510     | 289.107393       | V    | <b>600.310001</b> | 300.658639      | 583.283452     | 292.145364       | 582.299436     | 291.653356       | 6  |
| 6  | 652.239539        | 326.623408      | 634.228974     | 317.618125       | G    | <b>501.241587</b> | 251.124431      | 484.215038     | 242.611157       | 483.231022     | 242.119149       | 5  |
| 7  | 749.292303        | 375.149790      | 731.281738     | 366.144507       | P    | 444.220123        | 222.613699      | 427.193574     | 214.100425       | 426.209558     | 213.608417       | 4  |
| 8  | 864.319246        | 432.663261      | 846.308681     | 423.657979       | D    | 347.167359        | 174.087317      | 330.140810     | 165.574043       | 329.156794     | 165.082035       | 3  |
| 9  | 921.340710        | 461.173993      | 903.330145     | 452.168711       | G    | <b>232.140416</b> | 116.573846      | 215.113867     | 108.060571       |                |                  | 2  |
| 10 |                   |                 |                |                  | R    | 175.118952        | 88.063114       | 158.092403     | 79.549839        |                |                  | 1  |

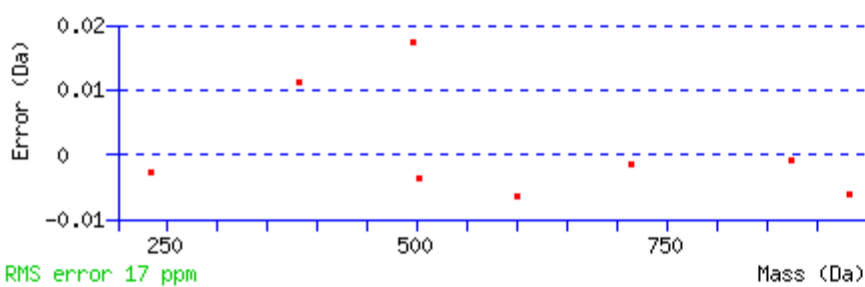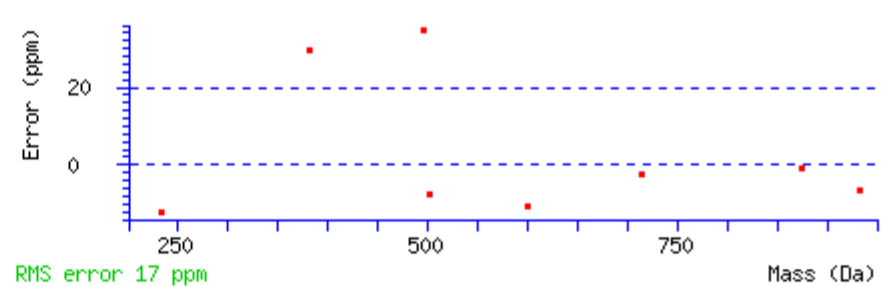

NCBI BLAST search of [YGCDVGPDGR](#)

(Parameters: blastp, nr protein database, expect=20000, no filter, PAM30)

Other BLAST [web gateways](#)

All matches to this query

| Score | Mr(calc):   | Delta     | Sequence                   |
|-------|-------------|-----------|----------------------------|
| 45.8  | 1094.445129 | -0.001661 | <a href="#">YGCDVGPDGR</a> |

Mascot: <http://www.matrixscience.com/>

**Peptide View**

MS/MS Fragmentation of **WAAVVVPSGEEQR**

Found in **1A01\_HUMAN**, HLA class I histocompatibility antigen, A-1 alpha chain OS=Homo sapiens GN=HLA-A PE=1 SV=1

Match to Query 42630: 1426.722108 from(714.368330,2+) rtinseconds(2286) index(28422)

Title: Locus:1.1.1.2197.43

Data file 2011-11-10 - TFD - EP 4-4.mgf

Click mouse within plot area to zoom in by factor of two about that point

Or, Plot from  to  Da

Label all possible matches  Label matches used for scoring

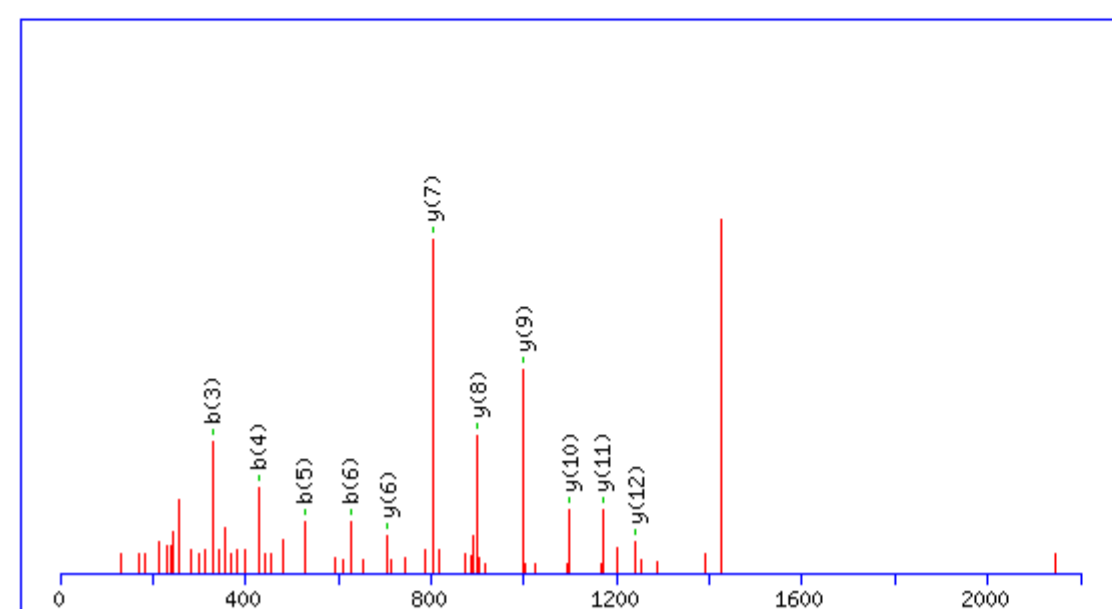

Monoisotopic mass of neutral peptide Mr(calc): 1426.720474

Fixed modifications: Propionamide (C) (apply to specified residues or termini only)

Ions Score: 63 Expect: 2.5e-006

Matches : 11/104 fragment ions using 13 most intense peaks ([help](#))

| #  | b           | b <sup>++</sup> | b <sup>*</sup> | b <sup>*++</sup> | b <sup>0</sup> | b <sup>0++</sup> | Seq. | y           | y <sup>++</sup> | y <sup>*</sup> | y <sup>*++</sup> | y <sup>0</sup> | y <sup>0++</sup> | #  |
|----|-------------|-----------------|----------------|------------------|----------------|------------------|------|-------------|-----------------|----------------|------------------|----------------|------------------|----|
| 1  | 187.086589  | 94.046932       |                |                  |                |                  | W    |             |                 |                |                  |                |                  | 13 |
| 2  | 258.123703  | 129.565490      |                |                  |                |                  | A    | 1241.648442 | 621.327859      | 1224.621893    | 612.814585       | 1223.637877    | 612.322577       | 12 |
| 3  | 329.160817  | 165.084047      |                |                  |                |                  | A    | 1170.611328 | 585.809302      | 1153.584779    | 577.296028       | 1152.600763    | 576.804020       | 11 |
| 4  | 428.229231  | 214.618254      |                |                  |                |                  | V    | 1099.574214 | 550.290745      | 1082.547665    | 541.777471       | 1081.563649    | 541.285462       | 10 |
| 5  | 527.297645  | 264.152461      |                |                  |                |                  | V    | 1000.505800 | 500.756538      | 983.479251     | 492.243264       | 982.495235     | 491.751256       | 9  |
| 6  | 626.366059  | 313.686668      |                |                  |                |                  | V    | 901.437386  | 451.222331      | 884.410837     | 442.709057       | 883.426821     | 442.217049       | 8  |
| 7  | 723.418823  | 362.213050      |                |                  |                |                  | P    | 802.368972  | 401.688124      | 785.342423     | 393.174850       | 784.358407     | 392.682842       | 7  |
| 8  | 810.450851  | 405.729064      |                |                  | 792.440286     | 396.723781       | S    | 705.316208  | 353.161742      | 688.289659     | 344.648468       | 687.305643     | 344.156460       | 6  |
| 9  | 867.472315  | 434.239796      |                |                  | 849.461750     | 425.234513       | G    | 618.284180  | 309.645728      | 601.257631     | 301.132454       | 600.273615     | 300.640446       | 5  |
| 10 | 996.514908  | 498.761092      |                |                  | 978.504343     | 489.755810       | E    | 561.262716  | 281.134996      | 544.236167     | 272.621722       | 543.252151     | 272.129714       | 4  |
| 11 | 1125.557501 | 563.282389      |                |                  | 1107.546936    | 554.277106       | E    | 432.220123  | 216.613699      | 415.193574     | 208.100425       | 414.209558     | 207.608417       | 3  |
| 12 | 1253.616079 | 627.311678      | 1236.589530    | 618.798403       | 1235.605514    | 618.306395       | Q    | 303.177530  | 152.092403      | 286.150981     | 143.579129       |                |                  | 2  |
| 13 |             |                 |                |                  |                |                  | R    | 175.118952  | 88.063114       | 158.092403     | 79.549839        |                |                  | 1  |

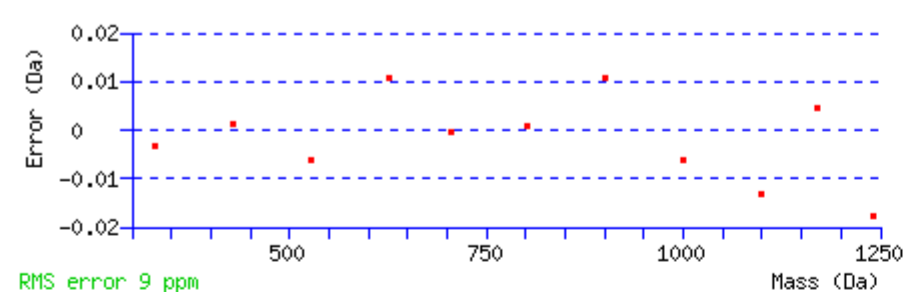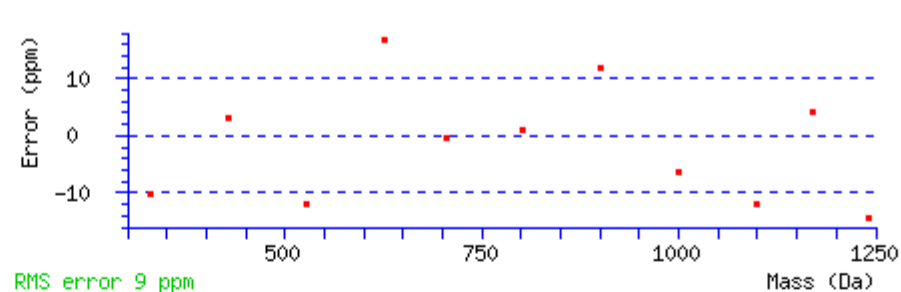

NCBI BLAST search of [WAAVVVPSGEEQR](#)

(Parameters: blastp, nr protein database, expect=20000, no filter, PAM30)

Other BLAST [web gateways](#)

All matches to this query

| Score | Mr(calc):   | Delta    | Sequence                      |
|-------|-------------|----------|-------------------------------|
| 62.5  | 1426.720474 | 0.001634 | <a href="#">WAAVVVPSGEEQR</a> |
| 2.7   | 1426.709915 | 0.012193 | <a href="#">VQRPEPSCRPR</a>   |

**Peptide View**

MS/MS Fragmentation of **STSVELTGDPNK**  
 Found in **HCAR2\_HUMAN**, Hydroxycarboxylic acid receptor 2 OS=Homo sapiens GN=HCAR2 PE=1 SV=1

Match to Query 31877: 1246.605228 from(624.309890,2+) rtinseconds(1356) index(10769)  
 Title: Locus:1.1.1.1844.40  
 Data file 2011-11-10 - TFD - EP 4-4.mgf

Click mouse within plot area to zoom in by factor of two about that point  
 Or, Plot from  to  Da   
 Label all possible matches  Label matches used for scoring

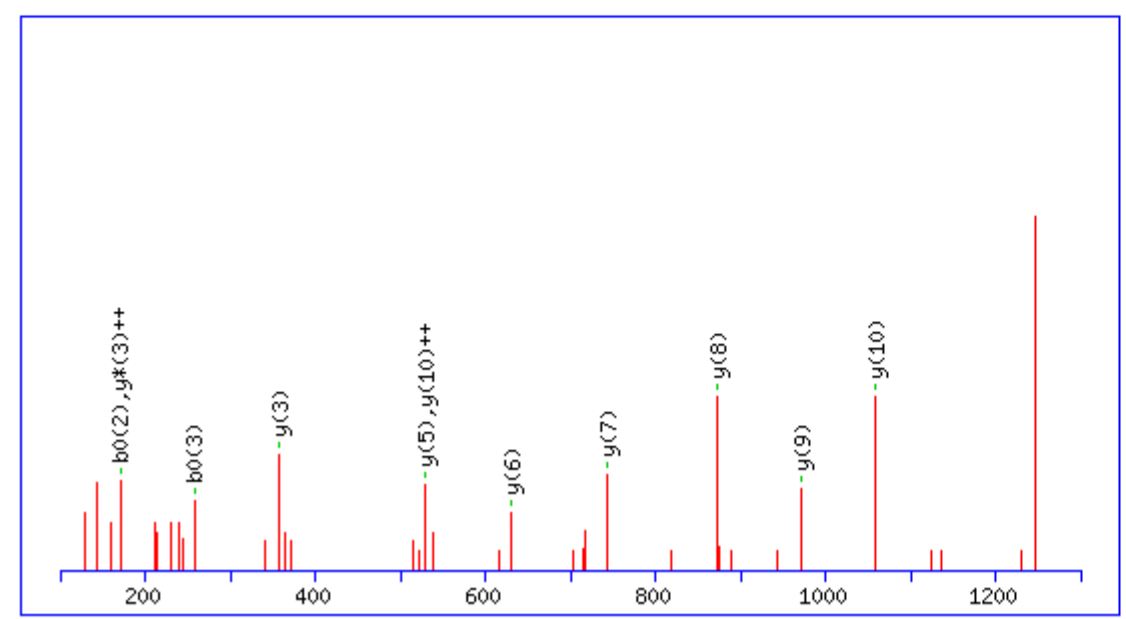

Monoisotopic mass of neutral peptide Mr(calcd): 1246.604111  
 Fixed modifications: Propionamide (C) (apply to specified residues or termini only)  
 Ions Score: 59 Expect: 1.2e-005  
 Matches : 11/106 fragment ions using 12 most intense peaks ([help](#))

| #  | b           | b <sup>++</sup> | b <sup>+</sup> | b <sup>+++</sup> | b <sup>0</sup> | b <sup>0++</sup> | Seq. | y           | y <sup>++</sup> | y <sup>+</sup> | y <sup>+++</sup> | y <sup>0</sup> | y <sup>0++</sup> | #  |
|----|-------------|-----------------|----------------|------------------|----------------|------------------|------|-------------|-----------------|----------------|------------------|----------------|------------------|----|
| 1  | 88.039304   | 44.523290       |                |                  | 70.028739      | 35.518008        | S    |             |                 |                |                  |                |                  | 12 |
| 2  | 189.086983  | 95.047129       |                |                  | 171.076418     | 86.041847        | T    | 1160.579359 | 580.793318      | 1143.552810    | 572.280043       | 1142.568794    | 571.788035       | 11 |
| 3  | 276.119011  | 138.563143      |                |                  | 258.108446     | 129.557861       | S    | 1059.531680 | 530.269478      | 1042.505131    | 521.756204       | 1041.521115    | 521.264196       | 10 |
| 4  | 375.187425  | 188.097350      |                |                  | 357.176860     | 179.092068       | V    | 972.499652  | 486.753464      | 955.473103     | 478.240190       | 954.489087     | 477.748182       | 9  |
| 5  | 504.230018  | 252.618647      |                |                  | 486.219453     | 243.613364       | E    | 873.431238  | 437.219257      | 856.404689     | 428.705983       | 855.420673     | 428.213975       | 8  |
| 6  | 617.314082  | 309.160679      |                |                  | 599.303517     | 300.155396       | L    | 744.388645  | 372.697961      | 727.362096     | 364.184686       | 726.378080     | 363.692678       | 7  |
| 7  | 718.361761  | 359.684519      |                |                  | 700.351196     | 350.679236       | T    | 631.304581  | 316.155929      | 614.278032     | 307.642654       | 613.294016     | 307.150646       | 6  |
| 8  | 775.383225  | 388.195251      |                |                  | 757.372660     | 379.189968       | G    | 530.256902  | 265.632089      | 513.230353     | 257.118815       | 512.246337     | 256.626807       | 5  |
| 9  | 890.410168  | 445.708722      |                |                  | 872.399603     | 436.703440       | D    | 473.235438  | 237.121357      | 456.208889     | 228.608083       | 455.224873     | 228.116075       | 4  |
| 10 | 987.462932  | 494.235104      |                |                  | 969.452367     | 485.229822       | P    | 358.208495  | 179.607886      | 341.181946     | 171.094611       |                |                  | 3  |
| 11 | 1101.505859 | 551.256568      | 1084.479310    | 542.743293       | 1083.495294    | 542.251285       | N    | 261.155731  | 131.081504      | 244.129182     | 122.568229       |                |                  | 2  |
| 12 |             |                 |                |                  |                |                  | K    | 147.112804  | 74.060040       | 130.086255     | 65.546765        |                |                  | 1  |

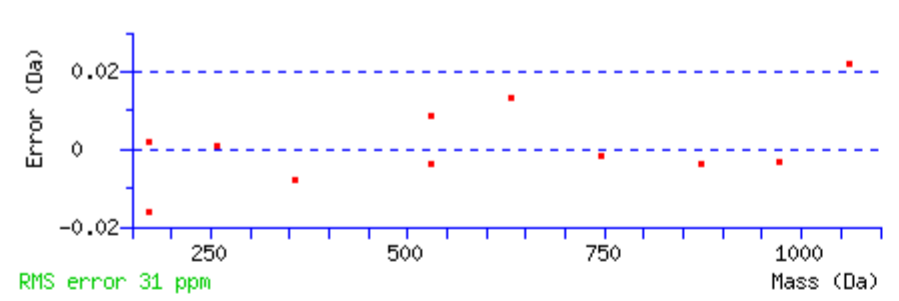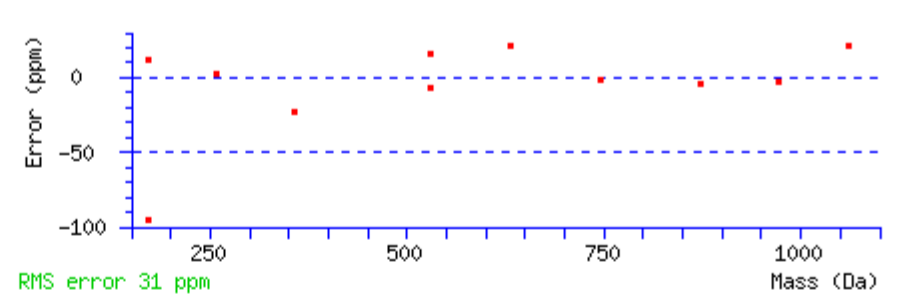

NCBI BLAST search of [STSVELTGDPNK](#)  
 (Parameters: blastp, nr protein database, expect=20000, no filter, PAM30)  
 Other BLAST [web gateways](#)

**All matches to this query**

| Score | Mr(calcd):  | Delta     | Sequence                     |
|-------|-------------|-----------|------------------------------|
| 59.3  | 1246.604111 | 0.001117  | <a href="#">STSVELTGDPNK</a> |
| 6.6   | 1246.604065 | 0.001163  | <a href="#">KELDEEESIR</a>   |
| 6.0   | 1246.615356 | -0.010128 | <a href="#">TTAVEDTVQAGR</a> |
| 4.0   | 1246.597565 | 0.007663  | <a href="#">KDNETIPCTR</a>   |
| 3.6   | 1246.615326 | -0.010098 | <a href="#">QTDAQSASSPKK</a> |
| 3.6   | 1246.615326 | -0.010098 | <a href="#">KQTDAQSASSPK</a> |

# MASCOT SEARCH RESULTS

## Peptide View

MS/MS Fragmentation of **DEQQISAAVEK**

Found in **HSDL2\_HUMAN**, Hydroxysteroid dehydrogenase-like protein 2 OS=Homo sapiens GN=HSDL2 PE=1 SV=1

Match to Query 541580: 1216.603888 from(609.309220,2+) rtinseconds(1545) index(253999)  
 Title: Locus:1.1.1.1034.22

Data file C:\Program Files (x86)\Matrix Science\Mascot Daemon\mgf3 TFD - Epitel - R2\mascot\_daemon\_merge.mgf

Click mouse within plot area to zoom in by factor of two about that point

Or, Plot from  to  Da

Label all possible matches  Label matches used for scoring

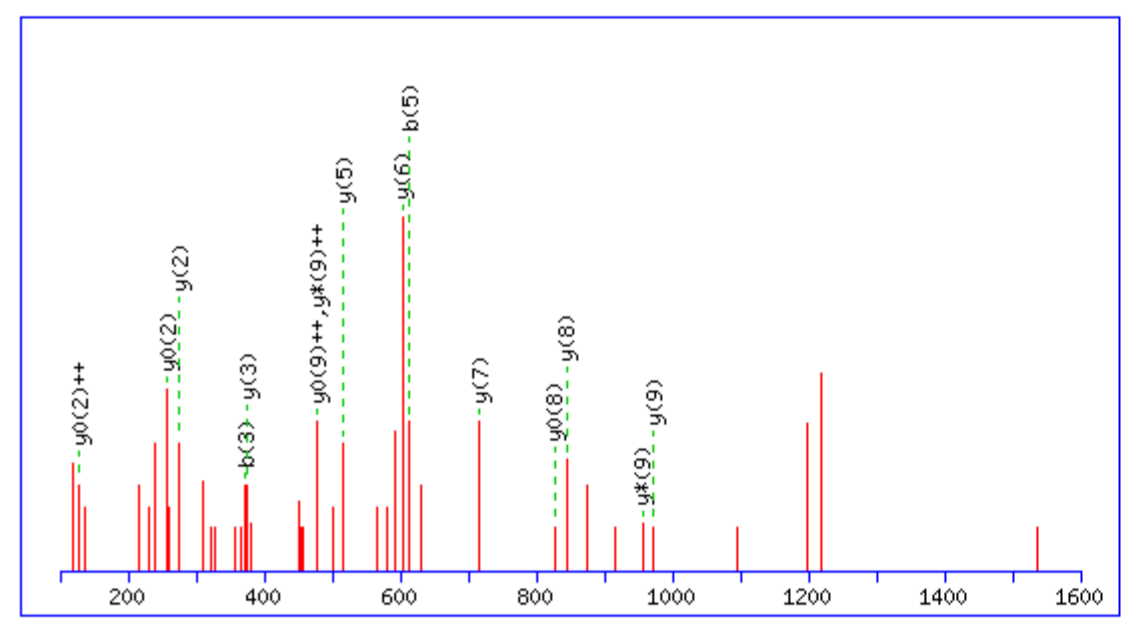

Monoisotopic mass of neutral peptide Mr(calc): 1216.593521

Fixed modifications: Carbamidomethyl (C) (apply to specified residues or termini only)

Ions Score: 52 Expect: 4.4e-005

Matches : 15/114 fragment ions using 24 most intense peaks [\(help\)](#)

| #  | b                 | b <sup>++</sup> | b <sup>*</sup> | b <sup>***</sup> | b <sup>0</sup> | b <sup>0++</sup> | Seq. | y                 | y <sup>++</sup> | y <sup>*</sup>    | y <sup>***</sup>  | y <sup>0</sup>    | y <sup>0++</sup>  | #  |
|----|-------------------|-----------------|----------------|------------------|----------------|------------------|------|-------------------|-----------------|-------------------|-------------------|-------------------|-------------------|----|
| 1  | 116.034219        | 58.520748       |                |                  | 98.023654      | 49.515465        | D    |                   |                 |                   |                   |                   |                   | 11 |
| 2  | 245.076812        | 123.042044      |                |                  | 227.066247     | 114.036762       | E    | 1102.573880       | 551.790578      | 1085.547331       | 543.277304        | 1084.563315       | 542.785295        | 10 |
| 3  | <b>373.135390</b> | 187.071333      | 356.108841     | 178.558059       | 355.124825     | 178.066051       | Q    | <b>973.531287</b> | 487.269282      | <b>956.504738</b> | <b>478.756007</b> | 955.520722        | <b>478.263999</b> | 9  |
| 4  | 501.193968        | 251.100622      | 484.167419     | 242.587348       | 483.183403     | 242.095340       | Q    | <b>845.472709</b> | 423.239992      | 828.446160        | 414.726718        | <b>827.462144</b> | 414.234710        | 8  |
| 5  | <b>614.278032</b> | 307.642654      | 597.251483     | 299.129380       | 596.267467     | 298.637372       | I    | <b>717.414131</b> | 359.210704      | 700.387582        | 350.697429        | 699.403566        | 350.205421        | 7  |
| 6  | 701.310060        | 351.158668      | 684.283511     | 342.645394       | 683.299495     | 342.153386       | S    | <b>604.330067</b> | 302.668672      | 587.303518        | 294.155397        | 586.319502        | 293.663389        | 6  |
| 7  | 772.347174        | 386.677225      | 755.320625     | 378.163951       | 754.336609     | 377.671943       | A    | <b>517.298039</b> | 259.152658      | 500.271490        | 250.639383        | 499.287474        | 250.147375        | 5  |
| 8  | 843.384288        | 422.195782      | 826.357739     | 413.682507       | 825.373723     | 413.190499       | A    | 446.260925        | 223.634100      | 429.234376        | 215.120826        | 428.250360        | 214.628818        | 4  |
| 9  | 942.452702        | 471.729989      | 925.426153     | 463.216714       | 924.442137     | 462.724706       | V    | <b>375.223811</b> | 188.115543      | 358.197262        | 179.602269        | 357.213246        | 179.110261        | 3  |
| 10 | 1071.495295       | 536.251285      | 1054.468746    | 527.738011       | 1053.484730    | 527.246003       | E    | <b>276.155397</b> | 138.581336      | 259.128848        | 130.068062        | <b>258.144832</b> | <b>129.576054</b> | 2  |
| 11 |                   |                 |                |                  |                |                  | K    | 147.112804        | 74.060040       | 130.086255        | 65.546765         |                   |                   | 1  |

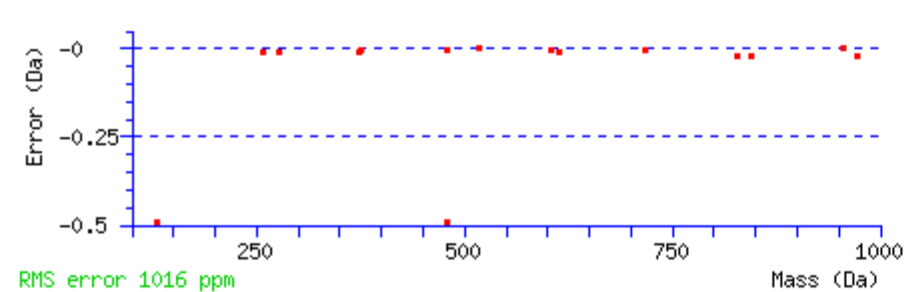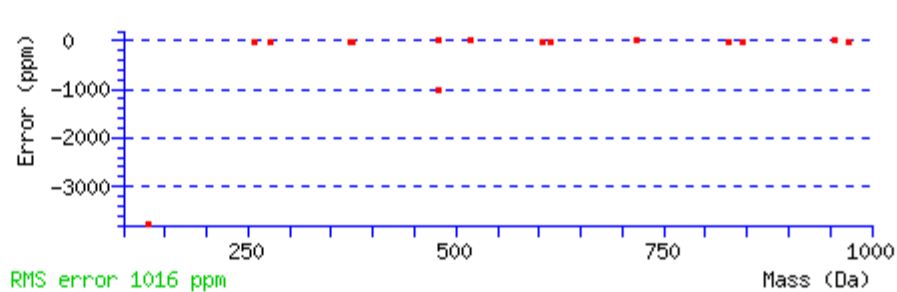

NCBI BLAST search of [DEQQISAAVEK](#)

(Parameters: blastp, nr protein database, expect=20000, no filter, PAM30)

Other BLAST [web gateways](#)

### All matches to this query

| Score | Mr(calc):   | Delta     | Sequence                      |
|-------|-------------|-----------|-------------------------------|
| 51.6  | 1216.593521 | 0.010367  | <a href="#">DEQQISAAVEK</a>   |
| 5.0   | 1216.604767 | -0.000879 | <a href="#">AGEAKGQAPTGSK</a> |
| 3.9   | 1216.604752 | -0.000864 | <a href="#">EENQTKLSR</a>     |
| 3.2   | 1216.604767 | -0.000879 | <a href="#">AAPTSAAPSKSR</a>  |
| 2.6   | 1216.616013 | -0.012125 | <a href="#">ESRPVQQTTR</a>    |
| 1.4   | 1216.612137 | -0.008249 | <a href="#">QELQKQAEML</a>    |
| 1.4   | 1216.600937 | 0.002951  | <a href="#">QEVGVIESPLM</a>   |
| 1.1   | 1216.598907 | 0.004981  | <a href="#">QEFTRSFFR</a>     |
| 0.9   | 1216.604767 | -0.000879 | <a href="#">RSEGPSLSPSGK</a>  |

# **MASCOT** Mascot Search Results

## Peptide View

MS/MS Fragmentation of **EGKNLLK**

Found in **IDS\_HUMAN**, Iduronate 2-sulfatase OS=Homo sapiens GN=IDS PE=1 SV=1

Match to Query 274: 800.468008 from(401.241280,2+) rtinseconds(2291) index(28798)

Title: Locus:1.1.1.2291.3

Data file 2011-11-10 - TFD - EP 3-3.mgf

Click mouse within plot area to zoom in by factor of two about that point

Or, Plot from  to  Da

Label all possible matches  Label matches used for scoring

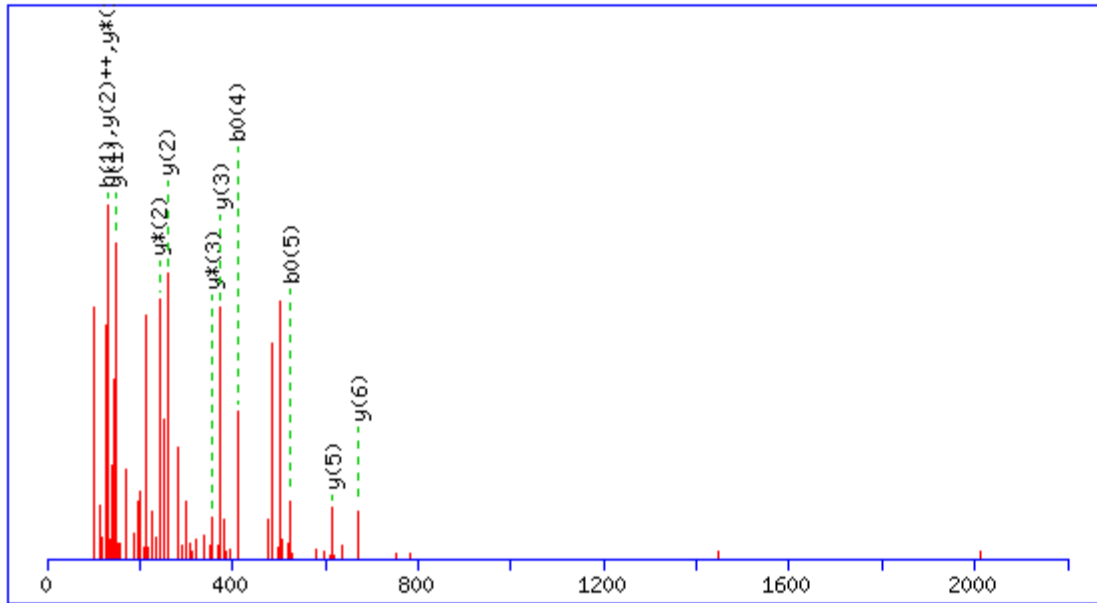

Monoisotopic mass of neutral peptide Mr(calc): 800.475571

Fixed modifications: Propionamide (C) (apply to specified residues or termini only)

Ions Score: 36 Expect: 0.0042

Matches : 12/56 fragment ions using 14 most intense peaks [\(help\)](#)

| # | b          | b <sup>++</sup> | b*         | b <sup>*++</sup> | b <sup>0</sup> | b <sup>0++</sup> | Seq. | y          | y <sup>++</sup> | y*         | y <sup>*++</sup> | # |
|---|------------|-----------------|------------|------------------|----------------|------------------|------|------------|-----------------|------------|------------------|---|
| 1 | 130.049869 | 65.528572       |            |                  | 112.039304     | 56.523290        | E    |            |                 |            |                  | 7 |
| 2 | 187.071333 | 94.039305       |            |                  | 169.060768     | 85.034022        | G    | 672.440286 | 336.723781      | 655.413737 | 328.210507       | 6 |
| 3 | 315.166296 | 158.086786      | 298.139747 | 149.573512       | 297.155731     | 149.081504       | K    | 615.418822 | 308.213049      | 598.392273 | 299.699775       | 5 |
| 4 | 429.209223 | 215.108250      | 412.182674 | 206.594975       | 411.198658     | 206.102967       | N    | 487.323859 | 244.165567      | 470.297310 | 235.652293       | 4 |
| 5 | 542.293287 | 271.650282      | 525.266738 | 263.137007       | 524.282722     | 262.644999       | L    | 373.280932 | 187.144104      | 356.254383 | 178.630829       | 3 |
| 6 | 655.377351 | 328.192314      | 638.350802 | 319.679039       | 637.366786     | 319.187031       | L    | 260.196868 | 130.602072      | 243.170319 | 122.088798       | 2 |
| 7 |            |                 |            |                  |                |                  | K    | 147.112804 | 74.060040       | 130.086255 | 65.546765        | 1 |

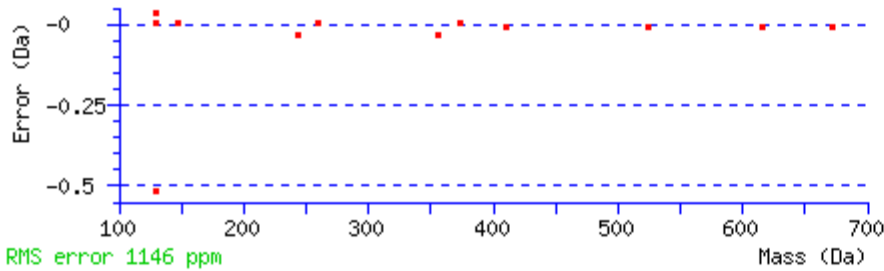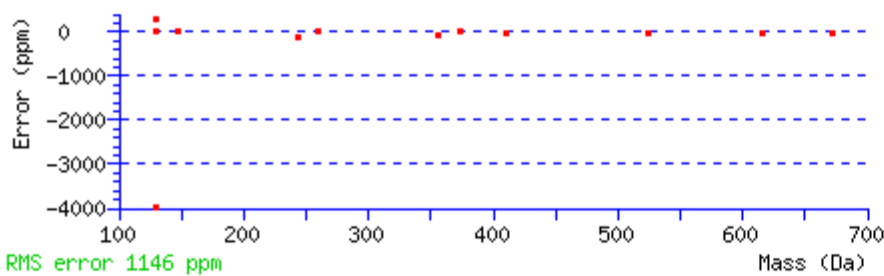

NCBI BLAST search of [EGKNLLK](#)

(Parameters: blastp, nr protein database, expect=20000, no filter, PAM30)

Other BLAST [web gateways](#)

## All matches to this query

| Score | Mr(calc):  | Delta     | Sequence                 |
|-------|------------|-----------|--------------------------|
| 54.9  | 800.464340 | 0.003668  | <a href="#">EGLELLK</a>  |
| 35.8  | 800.475571 | -0.007563 | <a href="#">EGKNLLK</a>  |
| 23.0  | 800.464340 | 0.003668  | <a href="#">EAEVLLK</a>  |
| 23.0  | 800.464355 | 0.003653  | <a href="#">EVLSPK</a>   |
| 21.7  | 800.464340 | 0.003668  | <a href="#">EILGEIK</a>  |
| 21.0  | 800.475586 | -0.007578 | <a href="#">VSLQNLK</a>  |
| 20.9  | 800.464355 | 0.003653  | <a href="#">EIPVSIK</a>  |
| 20.4  | 800.475586 | -0.007578 | <a href="#">EGKQVLK</a>  |
| 17.5  | 800.475586 | -0.007578 | <a href="#">SNGAVLIK</a> |
| 15.1  | 800.475586 | -0.007578 | <a href="#">QKVGELK</a>  |

# Mascot Search Results

## Peptide View

MS/MS Fragmentation of **QAPGQGLEWMGR**

Found in **HV103\_HUMAN**, Ig heavy chain V-I region V35 OS=Homo sapiens PE=1 SV=1

Match to Query 29786: 1328.632348 from(665.323450,2+) rtinseconds(2468) index(31123)

Title: Locus:1.1.1.2455.36

Data file 2011-11-12 - TFD - EP 5-3.mgf

Click mouse within plot area to zoom in by factor of two about that point

Or, Plot from  to  Da

Label all possible matches  Label matches used for scoring

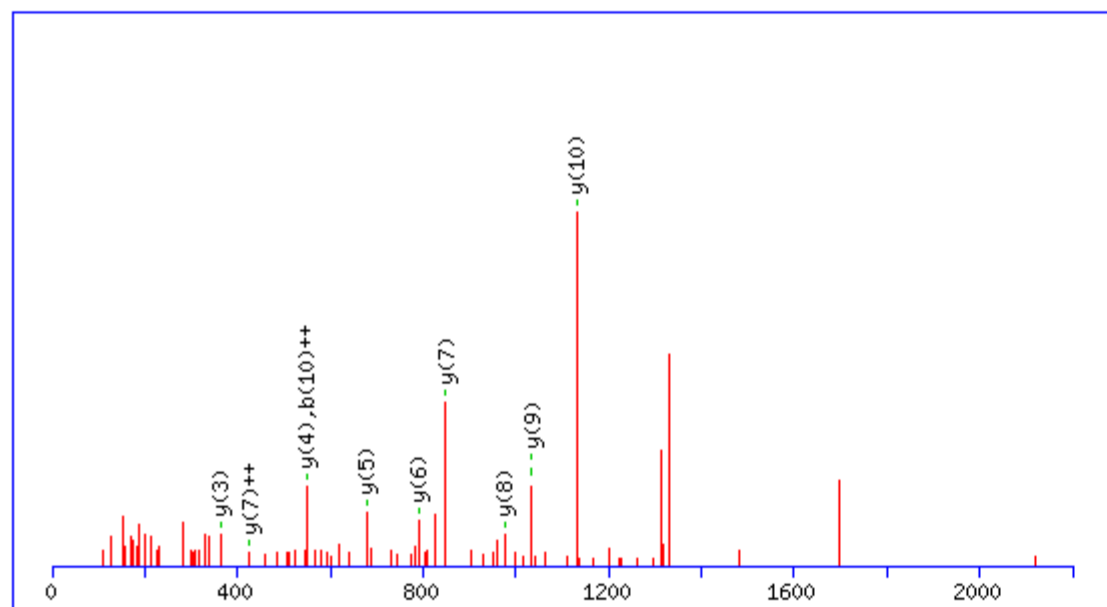

Monoisotopic mass of neutral peptide Mr(calc): 1328.629547

Fixed modifications: Propionamide (C) (apply to specified residues or termini only)

Ions Score: 68 Expect: 1.6e-006

Matches : 10/110 fragment ions using 13 most intense peaks [\(help\)](#)

| #  | b           | b <sup>++</sup>   | b <sup>*</sup> | b <sup>+++</sup> | b <sup>0</sup> | b <sup>0++</sup> | Seq. | y                  | y <sup>++</sup>   | y <sup>*</sup> | y <sup>+++</sup> | y <sup>0</sup> | y <sup>0++</sup> | #  |
|----|-------------|-------------------|----------------|------------------|----------------|------------------|------|--------------------|-------------------|----------------|------------------|----------------|------------------|----|
| 1  | 129.065854  | 65.036565         | 112.039305     | 56.523291        |                |                  | Q    |                    |                   |                |                  |                |                  | 12 |
| 2  | 200.102968  | 100.555122        | 183.076419     | 92.041848        |                |                  | A    | 1201.578255        | 601.292766        | 1184.551706    | 592.779491       | 1183.567690    | 592.287483       | 11 |
| 3  | 297.155732  | 149.081504        | 280.129183     | 140.568230       |                |                  | P    | <b>1130.541141</b> | 565.774208        | 1113.514592    | 557.260934       | 1112.530576    | 556.768926       | 10 |
| 4  | 354.177196  | 177.592236        | 337.150647     | 169.078961       |                |                  | G    | <b>1033.488377</b> | 517.247827        | 1016.461828    | 508.734552       | 1015.477812    | 508.242544       | 9  |
| 5  | 482.235774  | 241.621525        | 465.209225     | 233.108251       |                |                  | Q    | <b>976.466913</b>  | 488.737095        | 959.440364     | 480.223820       | 958.456348     | 479.731812       | 8  |
| 6  | 539.257238  | 270.132257        | 522.230689     | 261.618983       |                |                  | G    | <b>848.408335</b>  | <b>424.707806</b> | 831.381786     | 416.194531       | 830.397770     | 415.702523       | 7  |
| 7  | 652.341302  | 326.674289        | 635.314753     | 318.161015       |                |                  | L    | <b>791.386871</b>  | 396.197074        | 774.360322     | 387.683799       | 773.376306     | 387.191791       | 6  |
| 8  | 781.383895  | 391.195586        | 764.357346     | 382.682311       | 763.373330     | 382.190303       | E    | <b>678.302807</b>  | 339.655042        | 661.276258     | 331.141767       | 660.292242     | 330.649759       | 5  |
| 9  | 967.463208  | 484.235242        | 950.436659     | 475.721968       | 949.452643     | 475.229960       | W    | <b>549.260214</b>  | 275.133745        | 532.233665     | 266.620471       |                |                  | 4  |
| 10 | 1098.503693 | <b>549.755485</b> | 1081.477144    | 541.242210       | 1080.493128    | 540.750202       | M    | <b>363.180901</b>  | 182.094088        | 346.154352     | 173.580814       |                |                  | 3  |
| 11 | 1155.525157 | 578.266217        | 1138.498608    | 569.752942       | 1137.514592    | 569.260934       | G    | 232.140416         | 116.573846        | 215.113867     | 108.060571       |                |                  | 2  |
| 12 |             |                   |                |                  |                |                  | R    | 175.118952         | 88.063114         | 158.092403     | 79.549839        |                |                  | 1  |

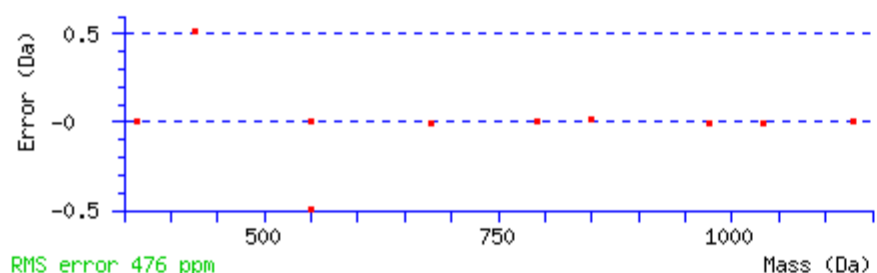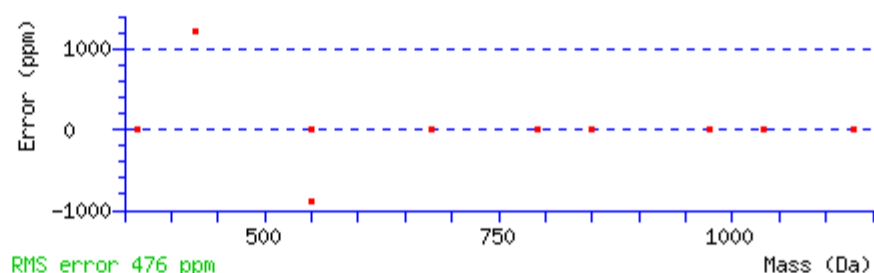

NCBI BLAST search of **QAPGQGLEWMGR**

(Parameters: blastp, nr protein database, expect=20000, no filter, PAM30)

Other BLAST [web gateways](#)

All matches to this query

| Score | Mr(calc):   | Delta    | Sequence                     |
|-------|-------------|----------|------------------------------|
| 67.8  | 1328.629547 | 0.002801 | <a href="#">QAPGQGLEWMGR</a> |

Mascot: <http://www.matrixscience.com/>

# MASCOT SCIENCE Mascot Search Results

## Peptide View

MS/MS Fragmentation of **VTISVDTSR**

Found in **HV206\_HUMAN**, Ig heavy chain V-II region WAH OS=Homo sapiens PE=1 SV=1

Match to Query 230428: 976.517788 from(489.266170,2+) rtinseconds(1602) index(339801)

Title: Locus:1.1.1.948.11

Data file C:\Program Files (x86)\Matrix Science\Mascot Daemon\mgf3 TFD - Epitel - R2\mascot\_daemon\_merge.mgf

Click mouse within plot area to zoom in by factor of two about that point

Or, Plot from  to  Da

Label all possible matches  Label matches used for scoring

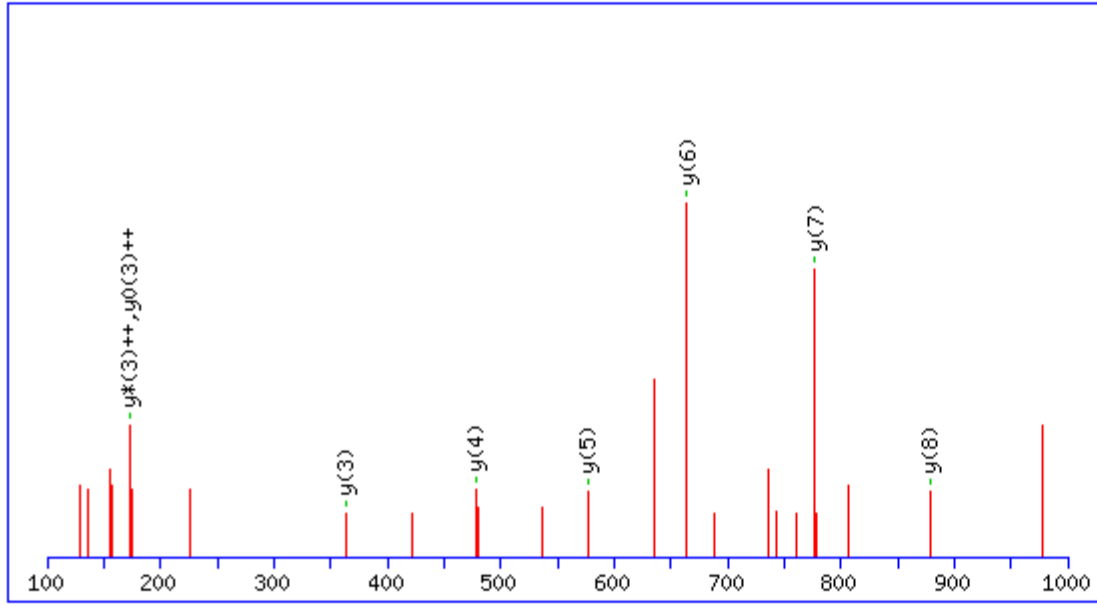

Monoisotopic mass of neutral peptide Mr(calc): 976.518936

Fixed modifications: Carbamidomethyl (C) (apply to specified residues or termini only)

Ions Score: 65 Expect: 1.1e-005

Matches : 8/76 fragment ions using 7 most intense peaks ([help](#))

| # | b          | b <sup>++</sup> | b <sup>0</sup> | b <sup>0++</sup> | Seq. | y                 | y <sup>++</sup> | y <sup>*</sup> | y <sup>*++</sup>  | y <sup>0</sup> | y <sup>0++</sup>  | # |
|---|------------|-----------------|----------------|------------------|------|-------------------|-----------------|----------------|-------------------|----------------|-------------------|---|
| 1 | 100.075690 | 50.541483       |                |                  | V    |                   |                 |                |                   |                |                   | 9 |
| 2 | 201.123369 | 101.065322      | 183.112804     | 92.060040        | T    | <b>878.457787</b> | 439.732532      | 861.431238     | 431.219257        | 860.447222     | 430.727249        | 8 |
| 3 | 314.207433 | 157.607354      | 296.196868     | 148.602072       | I    | <b>777.410108</b> | 389.208692      | 760.383559     | 380.695418        | 759.399543     | 380.203410        | 7 |
| 4 | 401.239461 | 201.123368      | 383.228896     | 192.118086       | S    | <b>664.326044</b> | 332.666660      | 647.299495     | 324.153386        | 646.315479     | 323.661378        | 6 |
| 5 | 500.307875 | 250.657575      | 482.297310     | 241.652293       | V    | <b>577.294016</b> | 289.150646      | 560.267467     | 280.637372        | 559.283451     | 280.145364        | 5 |
| 6 | 615.334818 | 308.171047      | 597.324253     | 299.165765       | D    | <b>478.225602</b> | 239.616439      | 461.199053     | 231.103165        | 460.215037     | 230.611157        | 4 |
| 7 | 716.382497 | 358.694887      | 698.371932     | 349.689604       | T    | <b>363.198659</b> | 182.102968      | 346.172110     | <b>173.589693</b> | 345.188094     | <b>173.097685</b> | 3 |
| 8 | 803.414525 | 402.210901      | 785.403960     | 393.205618       | S    | 262.150980        | 131.579128      | 245.124431     | 123.065854        | 244.140415     | 122.573846        | 2 |
| 9 |            |                 |                |                  | R    | 175.118952        | 88.063114       | 158.092403     | 79.549840         |                |                   | 1 |

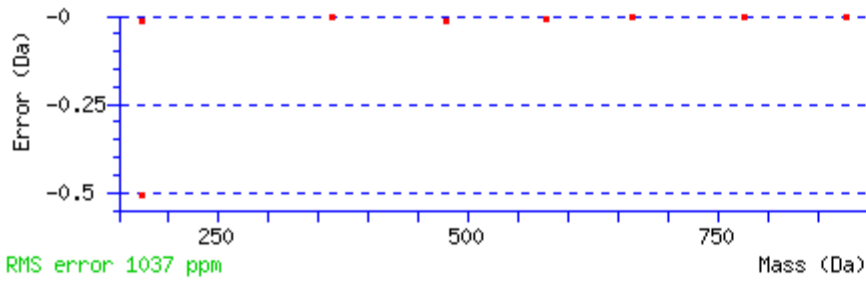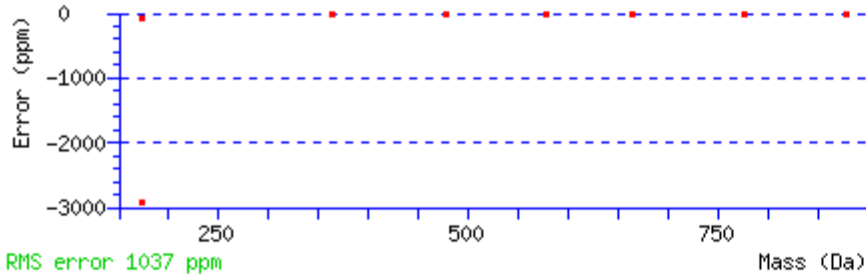

NCBI BLAST search of [VTISVDTSR](#)

(Parameters: blastp, nr protein database, expect=20000, no filter, PAM30)

Other BLAST [web gateways](#)

## All matches to this query

| Score | Mr(calc):  | Delta     | Sequence                   |
|-------|------------|-----------|----------------------------|
| 65.0  | 976.518936 | -0.001148 | <a href="#">VTISVDTSR</a>  |
| 13.3  | 976.526306 | -0.008518 | <a href="#">VTLQEMLK</a>   |
| 11.0  | 976.526306 | -0.008518 | <a href="#">ISSIVISQM</a>  |
| 9.9   | 976.509033 | 0.008755  | <a href="#">TVSPPPAHR</a>  |
| 1.7   | 976.526291 | -0.008503 | <a href="#">SIIMLQEK</a>   |
| 1.7   | 976.526321 | -0.008533 | <a href="#">SLLVGITSGM</a> |

# Mascot Search Results

## Peptide View

MS/MS Fragmentation of **NSLYLQMNSLR**

Found in **HV320\_HUMAN**, Ig heavy chain V-III region GAL OS=Homo sapiens PE=1 SV=1

Match to Query 35829: 1337.683448 from(669.849000,2+) rtinseconds(2758) index(37679)

Title: Locus:1.1.1.2468.34

Data file 2011-11-10 - TFD - EP 3-3.mgf

Click mouse within plot area to zoom in by factor of two about that point

Or, Plot from  to  Da

Label all possible matches  Label matches used for scoring

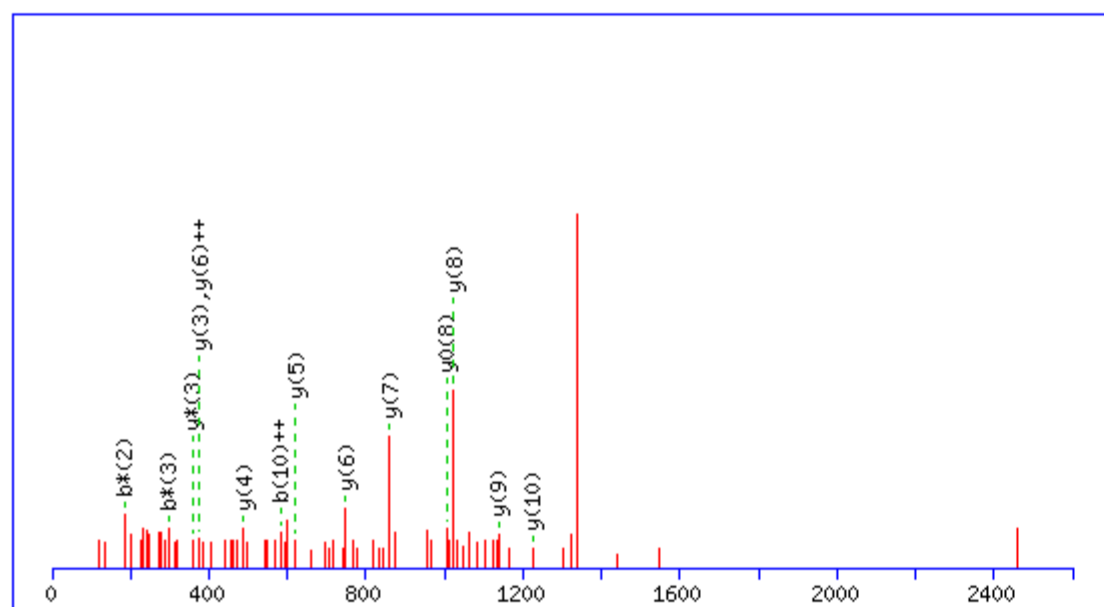

Monoisotopic mass of neutral peptide Mr(calc): 1337.676132

Fixed modifications: Propionamide (C) (apply to specified residues or termini only)

Ions Score: 44 Expect: 0.00047

Matches : 14/114 fragment ions using 25 most intense peaks ([help](#))

| #  | b           | b <sup>++</sup> | b <sup>*</sup> | b <sup>*++</sup> | b <sup>0</sup> | b <sup>0++</sup> | Seq. | y           | y <sup>++</sup> | y <sup>*</sup> | y <sup>*++</sup> | y <sup>0</sup> | y <sup>0++</sup> | #  |
|----|-------------|-----------------|----------------|------------------|----------------|------------------|------|-------------|-----------------|----------------|------------------|----------------|------------------|----|
| 1  | 115.050203  | 58.028740       | 98.023654      | 49.515465        |                |                  | N    |             |                 |                |                  |                |                  | 11 |
| 2  | 202.082231  | 101.544753      | 185.055682     | 93.031479        | 184.071666     | 92.539471        | S    | 1224.640519 | 612.823898      | 1207.613970    | 604.310623       | 1206.629954    | 603.818615       | 10 |
| 3  | 315.166295  | 158.086785      | 298.139746     | 149.573511       | 297.155730     | 149.081503       | L    | 1137.608491 | 569.307884      | 1120.581942    | 560.794609       | 1119.597926    | 560.302601       | 9  |
| 4  | 478.229624  | 239.618450      | 461.203075     | 231.105176       | 460.219059     | 230.613168       | Y    | 1024.524427 | 512.765851      | 1007.497878    | 504.252577       | 1006.513862    | 503.760569       | 8  |
| 5  | 591.313688  | 296.160482      | 574.287139     | 287.647208       | 573.303123     | 287.155200       | L    | 861.461098  | 431.234187      | 844.434549     | 422.720913       | 843.450533     | 422.228905       | 7  |
| 6  | 719.372266  | 360.189771      | 702.345717     | 351.676497       | 701.361701     | 351.184489       | Q    | 748.377034  | 374.692155      | 731.350485     | 366.178880       | 730.366469     | 365.686872       | 6  |
| 7  | 850.412751  | 425.710014      | 833.386202     | 417.196739       | 832.402186     | 416.704731       | M    | 620.318456  | 310.662866      | 603.291907     | 302.149591       | 602.307891     | 301.657583       | 5  |
| 8  | 964.455678  | 482.731477      | 947.429129     | 474.218203       | 946.445113     | 473.726195       | N    | 489.277971  | 245.142623      | 472.251422     | 236.629349       | 471.267406     | 236.137341       | 4  |
| 9  | 1051.487706 | 526.247491      | 1034.461157    | 517.734217       | 1033.477141    | 517.242209       | S    | 375.235044  | 188.121160      | 358.208495     | 179.607885       | 357.224479     | 179.115877       | 3  |
| 10 | 1164.571770 | 582.789523      | 1147.545221    | 574.276249       | 1146.561205    | 573.784241       | L    | 288.203016  | 144.605146      | 271.176467     | 136.091871       |                |                  | 2  |
| 11 |             |                 |                |                  |                |                  | R    | 175.118952  | 88.063114       | 158.092403     | 79.549839        |                |                  | 1  |

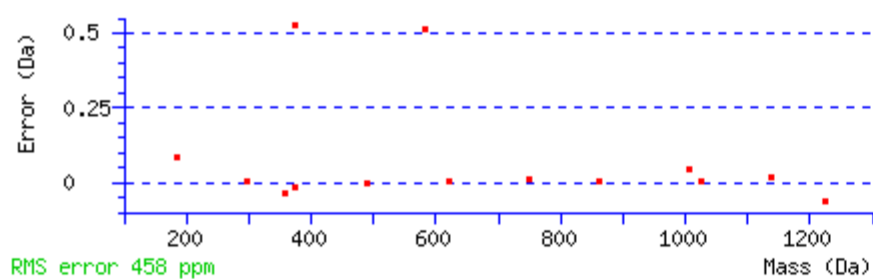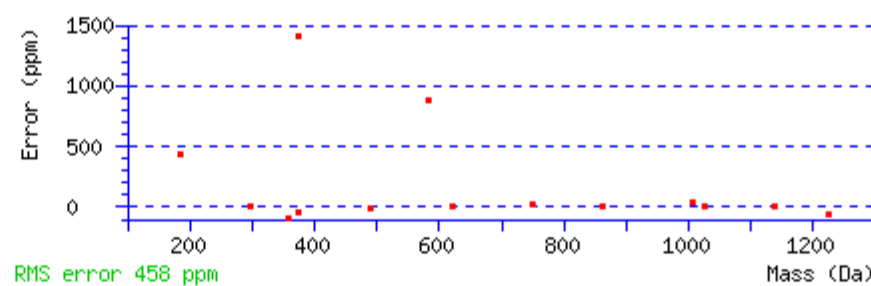

NCBI BLAST search of [NSLYLQMNSLR](#)

(Parameters: blastp, nr protein database, expect=20000, no filter, PAM30)

Other BLAST [web gateways](#)

## All matches to this query

| Score | Mr(calc):   | Delta     | Sequence                    |
|-------|-------------|-----------|-----------------------------|
| 43.6  | 1337.676132 | 0.007316  | <a href="#">NSLYLQMNSLR</a> |
| 32.1  | 1337.676147 | 0.007301  | <a href="#">BTVYLQMBSLR</a> |
| 1.8   | 1337.676132 | 0.007316  | <a href="#">NTLYLNMNSLR</a> |
| 1.3   | 1337.693436 | -0.009988 | <a href="#">KMSDLLELMVK</a> |



# MASCOT Search Results

## Peptide View

MS/MS Fragmentation of **NDSKNSLYLQMSLLR**  
 Found in **HV302\_HUMAN**, Ig heavy chain V-III region WEA OS=Homo sapiens PE=1 SV=1

Match to Query 41146: 1754.850912 from(585.957580,3+) rtinseconds(2542) index(26501)  
 Title: Locus:1.1.1.2377.31  
 Data file 2011-11-10 - TFD - EP 3-7.mgf

Click mouse within plot area to zoom in by factor of two about that point

Or, Plot from  to  Da

Label all possible matches  Label matches used for scoring

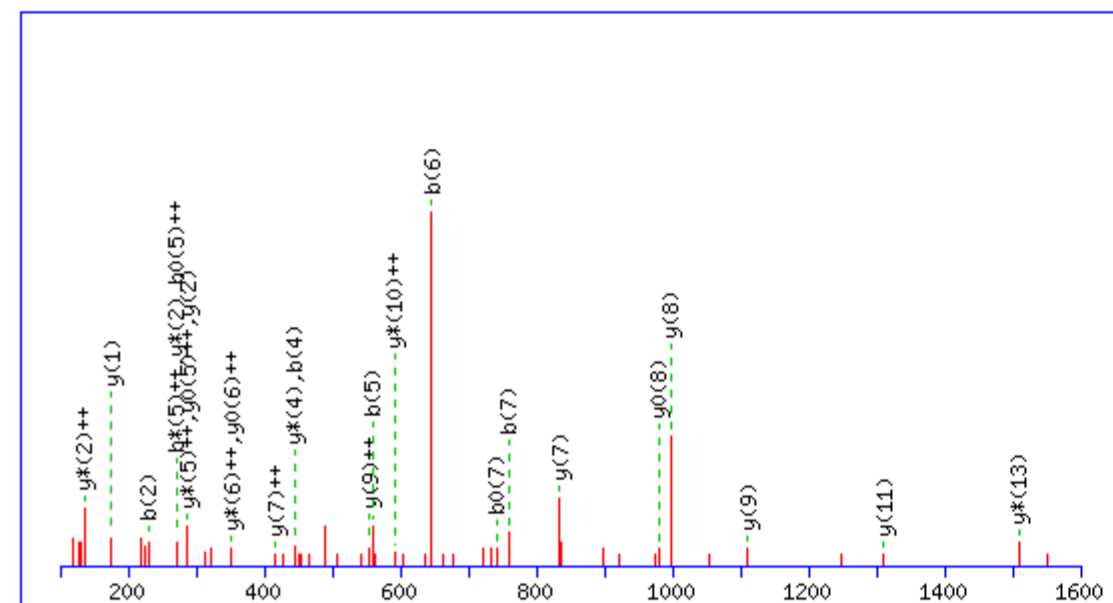

Monoisotopic mass of neutral peptide Mr(calc): 1754.862091  
 Fixed modifications: Propionamide (C) (apply to specified residues or termini only)  
 Ions Score: 35 Expect: 0.0032  
 Matches : 26/162 fragment ions using 33 most intense peaks ([help](#))

| #  | b                 | b <sup>++</sup> | b <sup>*</sup> | b <sup>+++</sup>  | b <sup>0</sup>    | b <sup>0++</sup>  | Seq. | y                  | y <sup>++</sup>   | y <sup>*</sup>     | y <sup>+++</sup>  | y <sup>0</sup>    | y <sup>0++</sup>  | #  |
|----|-------------------|-----------------|----------------|-------------------|-------------------|-------------------|------|--------------------|-------------------|--------------------|-------------------|-------------------|-------------------|----|
| 1  | 115.050203        | 58.028740       | 98.023654      | 49.515465         |                   |                   | N    |                    |                   |                    |                   |                   |                   | 15 |
| 2  | <b>230.077146</b> | 115.542211      | 213.050597     | 107.028937        | 212.066581        | 106.536928        | D    | 1641.826481        | 821.416879        | 1624.799932        | 812.903604        | 1623.815916       | 812.411596        | 14 |
| 3  | 317.109174        | 159.058225      | 300.082625     | 150.544951        | 299.098609        | 150.052943        | S    | 1526.799538        | 763.903407        | <b>1509.772989</b> | 755.390133        | 1508.788973       | 754.898124        | 13 |
| 4  | <b>445.204137</b> | 223.105707      | 428.177588     | 214.592432        | 427.193572        | 214.100424        | K    | 1439.767510        | 720.387393        | 1422.740961        | 711.874119        | 1421.756945       | 711.382110        | 12 |
| 5  | <b>559.247064</b> | 280.127170      | 542.220515     | <b>271.613896</b> | 541.236499        | <b>271.121888</b> | N    | <b>1311.672547</b> | 656.339911        | 1294.645998        | 647.826637        | 1293.661982       | 647.334629        | 11 |
| 6  | <b>646.279092</b> | 323.643184      | 629.252543     | 315.129910        | 628.268527        | 314.637902        | S    | 1197.629620        | 599.318448        | 1180.603071        | <b>590.805174</b> | 1179.619055       | 590.313165        | 10 |
| 7  | <b>759.363156</b> | 380.185216      | 742.336607     | 371.671942        | <b>741.352591</b> | 371.179934        | L    | <b>1110.597592</b> | <b>555.802434</b> | 1093.571043        | 547.289160        | 1092.587027       | 546.797152        | 9  |
| 8  | 922.426485        | 461.716881      | 905.399936     | 453.203606        | 904.415920        | 452.711598        | Y    | <b>997.513528</b>  | 499.260402        | 980.486979         | 490.747128        | <b>979.502963</b> | 490.255120        | 8  |
| 9  | 1035.510549       | 518.258912      | 1018.484000    | 509.745638        | 1017.499984       | 509.253630        | L    | <b>834.450199</b>  | <b>417.728738</b> | 817.423650         | 409.215463        | 816.439634        | 408.723455        | 7  |
| 10 | 1163.569127       | 582.288202      | 1146.542578    | 573.774927        | 1145.558562       | 573.282919        | Q    | 721.366135         | 361.186706        | 704.339586         | <b>352.673431</b> | 703.355570        | <b>352.181423</b> | 6  |
| 11 | 1294.609612       | 647.808444      | 1277.583063    | 639.295170        | 1276.599047       | 638.803161        | M    | 593.307557         | 297.157417        | 576.281008         | <b>288.644142</b> | 575.296992        | <b>288.152134</b> | 5  |
| 12 | 1381.641640       | 691.324458      | 1364.615091    | 682.811184        | 1363.631075       | 682.319176        | S    | 462.267072         | 231.637174        | <b>445.240523</b>  | 223.123899        | 444.256507        | 222.631891        | 4  |
| 13 | 1468.673668       | 734.840472      | 1451.647119    | 726.327198        | 1450.663103       | 725.835190        | S    | 375.235044         | 188.121160        | 358.208495         | 179.607885        | 357.224479        | 179.115877        | 3  |
| 14 | 1581.757732       | 791.382504      | 1564.731183    | 782.869230        | 1563.747167       | 782.377222        | L    | <b>288.203016</b>  | 144.605146        | <b>271.176467</b>  | <b>136.091871</b> |                   |                   | 2  |
| 15 |                   |                 |                |                   |                   |                   | R    | <b>175.118952</b>  | 88.063114         | 158.092403         | 79.549839         |                   |                   | 1  |

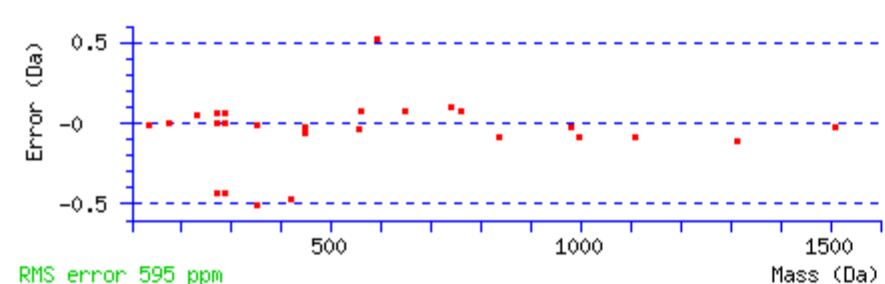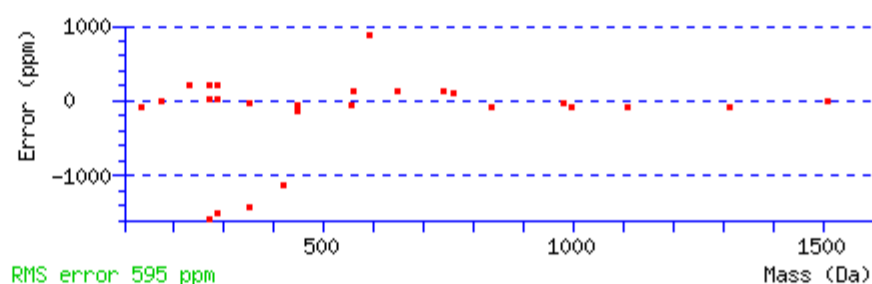

NCBI BLAST search of **NDSKNSLYLQMSLLR**  
 (Parameters: blastp, nr protein database, expect=20000, no filter, PAM30)  
 Other BLAST [web gateways](#)

### All matches to this query

| Score | Mr(calc):   | Delta     | Sequence                           |
|-------|-------------|-----------|------------------------------------|
| 35.5  | 1754.862091 | -0.011179 | <a href="#">NBSKNSLYLQMSLLR</a>    |
| 22.5  | 1754.843491 | 0.007421  | <a href="#">EGTEAAAAPAGGSPQGPK</a> |
| 12.7  | 1754.843491 | 0.007421  | <a href="#">EGTEAAAAPAGGSPQGPK</a> |
| 10.6  | 1754.850906 | 0.000006  | <a href="#">ALSGGGSVASPPSPAMPK</a> |
| 8.2   | 1754.862122 | -0.011210 | <a href="#">GASPDMAPILEPVDRR</a>   |
| 8.2   | 1754.862122 | -0.011210 | <a href="#">GASPDMAPILEPVDRR</a>   |
| 7.2   | 1754.850906 | 0.000006  | <a href="#">ALSGGGSVASPPSPAMPK</a> |
| 7.2   | 1754.850906 | 0.000006  | <a href="#">ALSGGGSVASPPSPAMPK</a> |
| 7.2   | 1754.850906 | 0.000006  | <a href="#">ALSGGGSVASPPSPAMPK</a> |
| 7.2   | 1754.850906 | 0.000006  | <a href="#">ALSGGGSVASPPSPAMPK</a> |

# Mascot Search Results

## Peptide View

MS/MS Fragmentation of **DIQMTQSPSTLSASVGDR**  
Found in **KV104\_HUMAN**, Ig kappa chain V-I region CAR OS=Homo sapiens PE=1 SV=1

Match to Query 54418: 1907.885988 from(954.950270,2+) rtinseconds(2011) index(20688)  
Title: Locus:1.1.1.2184.51  
Data file 2011-11-13 - TFD - EP 7-5.mgf

Click mouse within plot area to zoom in by factor of two about that point

Or, Plot from  to  Da

Label all possible matches  Label matches used for scoring

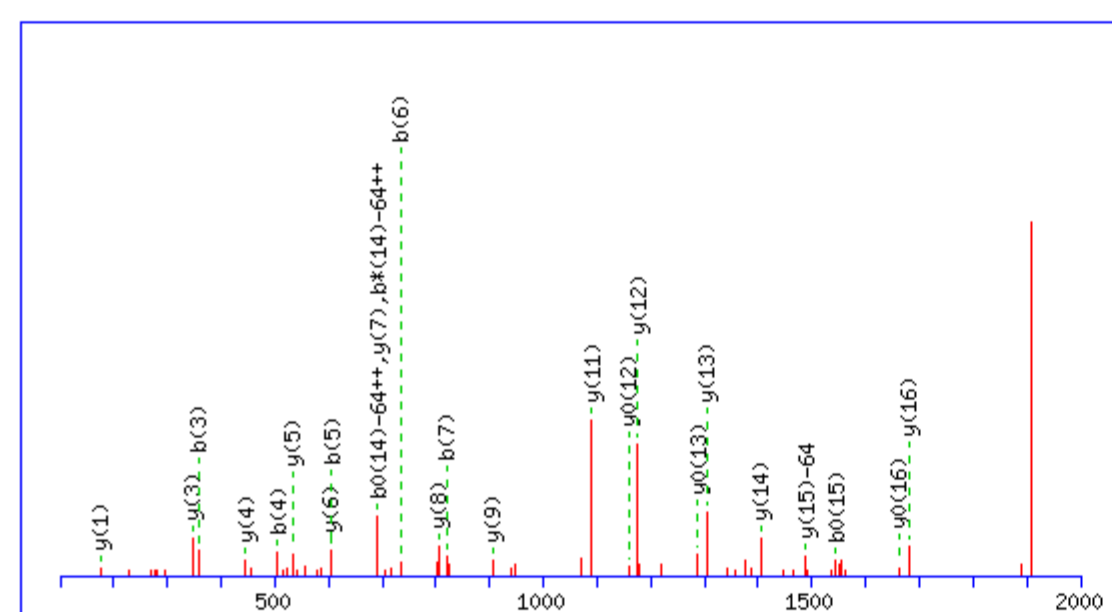

Monoisotopic mass of neutral peptide Mr(calc): 1907.889481  
Fixed modifications: Propionamide (C) (apply to specified residues or termini only)  
Variable modifications:  
M4 : Oxidation (M), with neutral losses 0.000000 (shown in table), 63.998285  
Ions Score: 123 Expect: 5.1e-012  
Matches : 25/300 fragment ions using 30 most intense peaks [\(help\)](#)

| #  | b                 | b <sup>++</sup> | b <sup>*</sup> | b <sup>++</sup> | b <sup>0</sup>     | b <sup>0++</sup> | Seq. | y                  | y <sup>++</sup> | y <sup>*</sup> | y <sup>++</sup> | y <sup>0</sup>     | y <sup>0++</sup> | #  |
|----|-------------------|-----------------|----------------|-----------------|--------------------|------------------|------|--------------------|-----------------|----------------|-----------------|--------------------|------------------|----|
| 1  | 116.034219        | 58.520748       |                |                 | 98.023654          | 49.515465        | D    |                    |                 |                |                 |                    |                  | 18 |
| 2  | 229.118283        | 115.062779      |                |                 | 211.107718         | 106.057497       | I    | 1793.869805        | 897.438541      | 1776.843256    | 888.925266      | 1775.859240        | 888.433258       | 17 |
| 3  | <b>357.176861</b> | 179.092068      | 340.150312     | 170.578794      | 339.166296         | 170.086786       | Q    | <b>1680.785741</b> | 840.896509      | 1663.759192    | 832.383234      | <b>1662.775176</b> | 831.891226       | 16 |
| 4  | <b>504.212261</b> | 252.609768      | 487.185712     | 244.096494      | 486.201696         | 243.604486       | M    | 1552.727163        | 776.867220      | 1535.700614    | 768.353945      | 1534.716598        | 767.861937       | 15 |
| 5  | <b>605.259940</b> | 303.133608      | 588.233391     | 294.620334      | 587.249375         | 294.128326       | T    | <b>1405.691763</b> | 703.349520      | 1388.665214    | 694.836245      | 1387.681198        | 694.344237       | 14 |
| 6  | <b>733.318518</b> | 367.162897      | 716.291969     | 358.649623      | 715.307953         | 358.157615       | Q    | <b>1304.644084</b> | 652.825680      | 1287.617535    | 644.312406      | <b>1286.633519</b> | 643.820398       | 13 |
| 7  | <b>820.350546</b> | 410.678911      | 803.323997     | 402.165637      | 802.339981         | 401.673629       | S    | <b>1176.585506</b> | 588.796391      | 1159.558957    | 580.283117      | <b>1158.574941</b> | 579.791109       | 12 |
| 8  | 917.403310        | 459.205293      | 900.376761     | 450.692019      | 899.392745         | 450.200011       | P    | <b>1089.553478</b> | 545.280377      | 1072.526929    | 536.767103      | 1071.542913        | 536.275095       | 11 |
| 9  | 1004.435338       | 502.721307      | 987.408789     | 494.208033      | 986.424773         | 493.716025       | S    | 992.500714         | 496.753995      | 975.474165     | 488.240721      | 974.490149         | 487.748713       | 10 |
| 10 | 1105.483017       | 553.245147      | 1088.456468    | 544.731872      | 1087.472452        | 544.239864       | T    | <b>905.468686</b>  | 453.237981      | 888.442137     | 444.724707      | 887.458121         | 444.232699       | 9  |
| 11 | 1218.567081       | 609.787178      | 1201.540532    | 601.273904      | 1200.556516        | 600.781896       | L    | <b>804.421007</b>  | 402.714142      | 787.394458     | 394.200867      | 786.410442         | 393.708859       | 8  |
| 12 | 1305.599109       | 653.303193      | 1288.572560    | 644.789918      | 1287.588544        | 644.297910       | S    | <b>691.336943</b>  | 346.172110      | 674.310394     | 337.658835      | 673.326378         | 337.166827       | 7  |
| 13 | 1376.636223       | 688.821750      | 1359.609674    | 680.308475      | 1358.625658        | 679.816467       | A    | <b>604.304915</b>  | 302.656096      | 587.278366     | 294.142821      | 586.294350         | 293.650813       | 6  |
| 14 | 1463.668251       | 732.337764      | 1446.641702    | 723.824489      | 1445.657686        | 723.332481       | S    | <b>533.267801</b>  | 267.137539      | 516.241252     | 258.624264      | 515.257236         | 258.132256       | 5  |
| 15 | 1562.736665       | 781.871971      | 1545.710116    | 773.358696      | <b>1544.726100</b> | 772.866688       | V    | <b>446.235773</b>  | 223.621524      | 429.209224     | 215.108250      | 428.225208         | 214.616242       | 4  |
| 16 | 1619.758129       | 810.382703      | 1602.731580    | 801.869428      | 1601.747564        | 801.377420       | G    | <b>347.167359</b>  | 174.087317      | 330.140810     | 165.574043      | 329.156794         | 165.082035       | 3  |
| 17 | 1734.785072       | 867.896174      | 1717.758523    | 859.382900      | 1716.774507        | 858.890892       | D    | 290.145895         | 145.576585      | 273.119346     | 137.063311      | 272.135330         | 136.571303       | 2  |
| 18 |                   |                 |                |                 |                    |                  | R    | <b>175.118952</b>  | 88.063114       | 158.092403     | 79.549839       |                    |                  | 1  |

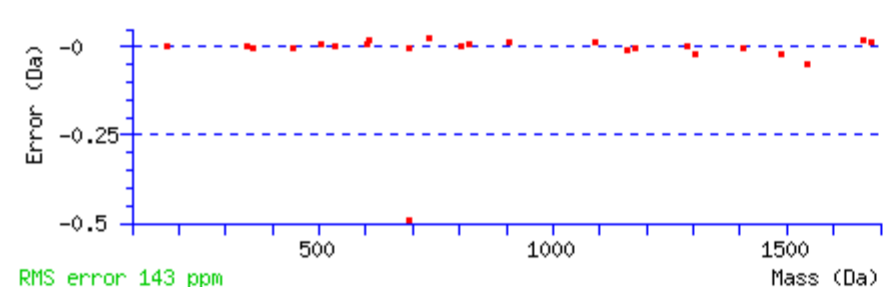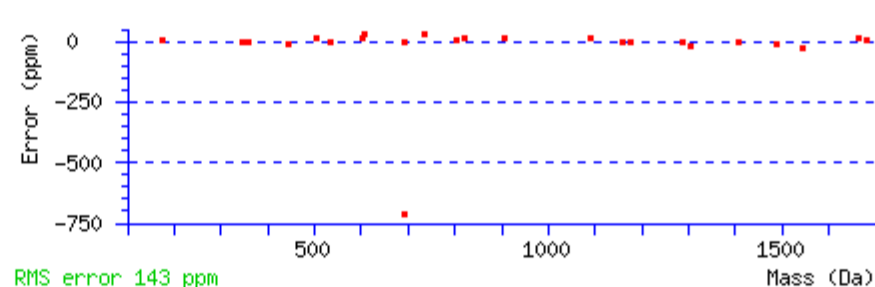

NCBI BLAST search of **DIQMTQSPSTLSASVGDR**  
(Parameters: blastp, nr protein database, expect=20000, no filter, PAM30)  
Other BLAST [web gateways](#)

## All matches to this query

| Score | Mr(calc):   | Delta     | Sequence                               |
|-------|-------------|-----------|----------------------------------------|
| 123.4 | 1907.889481 | -0.003493 | <a href="#">DIQMTQSPSTLSASVGDR</a>     |
| 76.2  | 1907.889481 | -0.003493 | <a href="#">DIQMTQSPSSLSATVGDR</a>     |
| 44.8  | 1907.889481 | -0.003493 | <a href="#">DIQMTQSPSTLSASVGDR</a>     |
| 16.0  | 1907.889481 | -0.003493 | <a href="#">DIQMTQSPSSLSATVGDR</a>     |
| 11.7  | 1907.870834 | 0.015154  | <a href="#">SEGKSLPSSPSSPASR</a>       |
| 9.2   | 1907.882080 | 0.003908  | <a href="#">LDSSSDSASGQGQVKATR</a>     |
| 2.6   | 1907.896851 | -0.010863 | <a href="#">VMLEGDSEEMGVIPSKR</a>      |
| 1.6   | 1907.901382 | -0.015394 | <a href="#">GGGGDPGPGPAPAPAPPPAPDK</a> |
| 1.3   | 1907.886932 | -0.000944 | <a href="#">LPEYTREALCPPACR</a>        |
| 0.5   | 1907.901382 | -0.015394 | <a href="#">GGGGDPGPGPAPAPAPPPAPDK</a> |

# MASCOT SCIENCE Mascot Search Results

## Peptide View

MS/MS Fragmentation of **LLIYGASTR**

Found in **KV113\_HUMAN**, Ig kappa chain V-I region Lay OS=Homo sapiens PE=1 SV=1

Match to Query 14707: 992.567568 from(497.291060,2+) rtinseconds(2077) index(21905)

Title: Locus:1.1.1.2209.18

Data file 2011-11-13 - TFD - EP 7-5.mgf

Click mouse within plot area to zoom in by factor of two about that point

Or, Plot from  to  Da

Label all possible matches  Label matches used for scoring

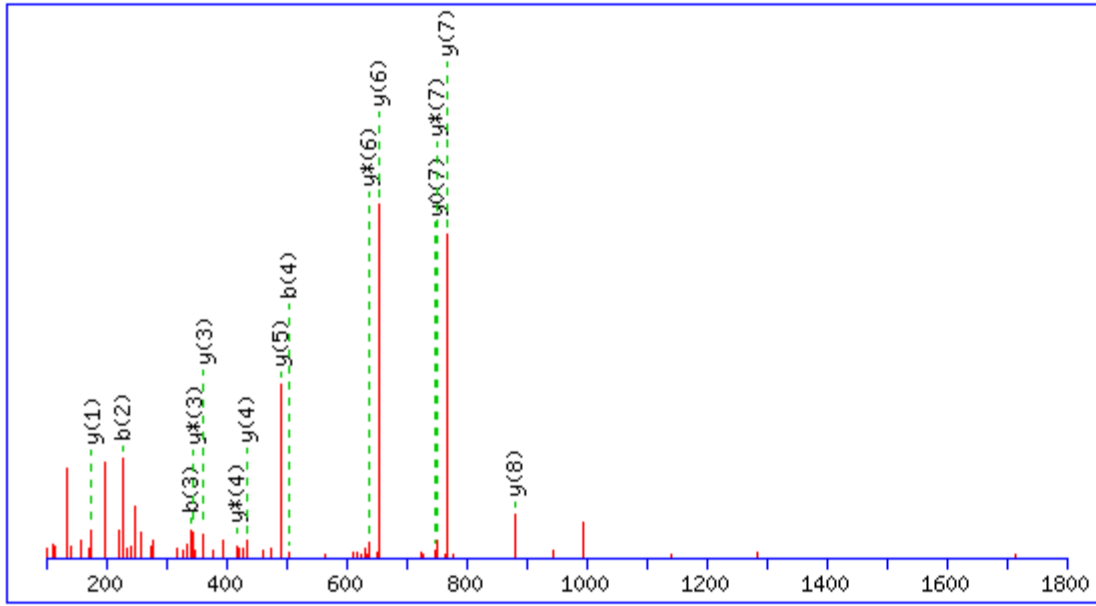

Monoisotopic mass of neutral peptide  $M_r(\text{calc})$ : 992.565460

Fixed modifications: Propionamide (C) (apply to specified residues or termini only)

Ions Score: 58 Expect: 7e-006

Matches : 15/66 fragment ions using 22 most intense peaks [\(help\)](#)

| # | b                 | b <sup>++</sup> | b <sup>0</sup> | b <sup>0++</sup> | Seq. | y                 | y <sup>++</sup> | y <sup>*</sup>    | y <sup>+++</sup> | y <sup>0</sup>    | y <sup>0++</sup> | # |
|---|-------------------|-----------------|----------------|------------------|------|-------------------|-----------------|-------------------|------------------|-------------------|------------------|---|
| 1 | 114.091340        | 57.549308       |                |                  | L    |                   |                 |                   |                  |                   |                  | 9 |
| 2 | <b>227.175404</b> | 114.091340      |                |                  | L    | <b>880.488694</b> | 440.747985      | 863.462145        | 432.234711       | 862.478129        | 431.742703       | 8 |
| 3 | <b>340.259468</b> | 170.633372      |                |                  | I    | <b>767.404630</b> | 384.205953      | <b>750.378081</b> | 375.692679       | <b>749.394065</b> | 375.200671       | 7 |
| 4 | <b>503.322797</b> | 252.165036      |                |                  | Y    | <b>654.320566</b> | 327.663921      | <b>637.294017</b> | 319.150647       | 636.310001        | 318.658639       | 6 |
| 5 | 560.344261        | 280.675769      |                |                  | G    | <b>491.257237</b> | 246.132256      | 474.230688        | 237.618982       | 473.246672        | 237.126974       | 5 |
| 6 | 631.381375        | 316.194326      |                |                  | A    | <b>434.235773</b> | 217.621524      | <b>417.209224</b> | 209.108250       | 416.225208        | 208.616242       | 4 |
| 7 | 718.413403        | 359.710340      | 700.402838     | 350.705057       | S    | <b>363.198659</b> | 182.102967      | <b>346.172110</b> | 173.589693       | 345.188094        | 173.097685       | 3 |
| 8 | 819.461082        | 410.234179      | 801.450517     | 401.228897       | T    | 276.166631        | 138.586953      | 259.140082        | 130.073679       | 258.156066        | 129.581671       | 2 |
| 9 |                   |                 |                |                  | R    | <b>175.118952</b> | 88.063114       | 158.092403        | 79.549839        |                   |                  | 1 |

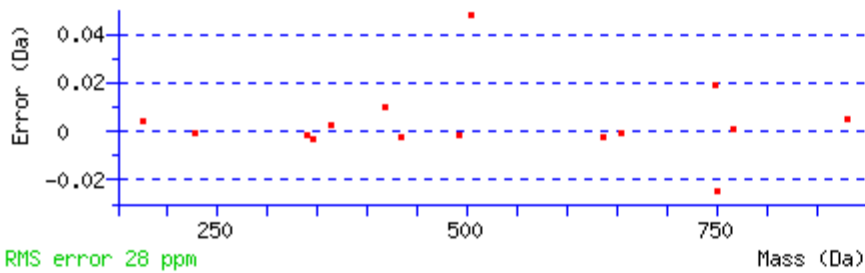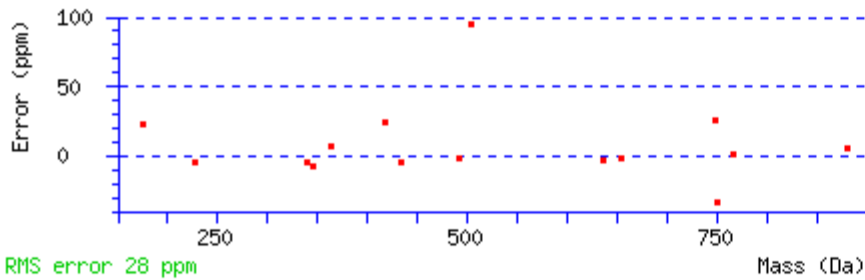

NCBI BLAST search of **LLIYGASTR**

(Parameters: blastp, nr protein database, expect=20000, no filter, PAM30)

Other BLAST [web gateways](#)

## All matches to this query

| Score | $M_r(\text{calc})$ : | Delta     | Sequence                  |
|-------|----------------------|-----------|---------------------------|
| 58.4  | 992.565460           | 0.002108  | <a href="#">LLIYGASTR</a> |
| 58.4  | 992.565460           | 0.002108  | <a href="#">LLIYGATSR</a> |
| 5.9   | 992.576691           | -0.009123 | <a href="#">LRPLPPER</a>  |
| 5.7   | 992.565475           | 0.002093  | <a href="#">EPLHVVATK</a> |
| 4.8   | 992.576691           | -0.009123 | <a href="#">LRPLPPER</a>  |
| 0.9   | 992.565460           | 0.002108  | <a href="#">IPKPELHK</a>  |
| 0.9   | 992.576706           | -0.009138 | <a href="#">LPPRPVNGK</a> |
| 0.8   | 992.576706           | -0.009138 | <a href="#">LIHVLDAGR</a> |
| 0.6   | 992.565460           | 0.002108  | <a href="#">LLQTLSYR</a>  |
| 0.0   | 992.576691           | -0.009123 | <a href="#">LRPLPPER</a>  |

**Peptide View**

MS/MS Fragmentation of **DIQMTQSPSSVSASVGDR**  
 Found in **KV119\_HUMAN**, Ig kappa chain V-I region Wes OS=Homo sapiens PE=1 SV=1

Match to Query 54748: 1879.854168 from(940.934360,2+) rtinseconds(1769) index(16967)  
 Title: Locus:1.1.1.1965.51  
 Data file 2011-11-12 - TFD - EP 6-5.mgf

Click mouse within plot area to zoom in by factor of two about that point  
 Or, Plot from  to  Da   
 Label all possible matches  Label matches used for scoring

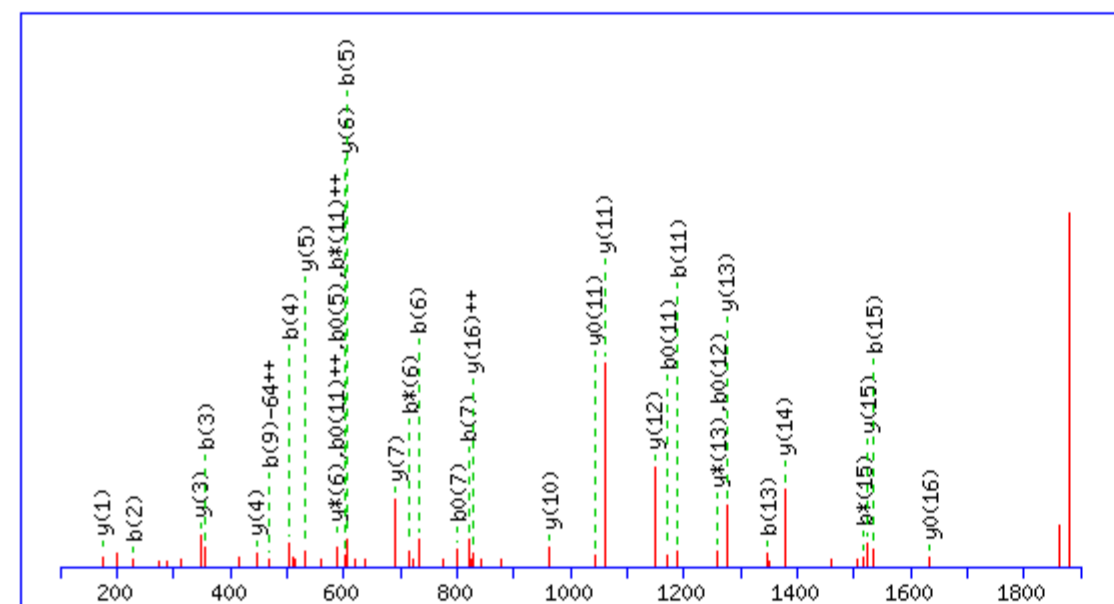

Monoisotopic mass of neutral peptide  $M_r(\text{calc})$ : 1879.858185  
 Fixed modifications: Propionamide (C) (apply to specified residues or termini only)  
 Variable modifications:  
 M4 : Oxidation (M), with neutral losses 0.000000 (shown in table), 63.998285  
 Ions Score: 101 Expect: 6.5e-010  
 Matches : 35/300 fragment ions using 40 most intense peaks ([help](#))

| #  | b                  | b <sup>++</sup> | b <sup>*</sup>     | b <sup>+++</sup>  | b <sup>0</sup>     | b <sup>0++</sup>  | Seq. | y                  | y <sup>++</sup>   | y <sup>*</sup>     | y <sup>+++</sup> | y <sup>0</sup>     | y <sup>0++</sup> | #  |
|----|--------------------|-----------------|--------------------|-------------------|--------------------|-------------------|------|--------------------|-------------------|--------------------|------------------|--------------------|------------------|----|
| 1  | 116.034219         | 58.520748       |                    |                   | 98.023654          | 49.515465         | D    |                    |                   |                    |                  |                    |                  | 18 |
| 2  | <b>229.118283</b>  | 115.062779      |                    |                   | 211.107718         | 106.057497        | I    | 1765.838504        | 883.422890        | 1748.811955        | 874.909616       | 1747.827939        | 874.417608       | 17 |
| 3  | <b>357.176861</b>  | 179.092068      | 340.150312         | 170.578794        | 339.166296         | 170.086786        | Q    | 1652.754440        | <b>826.880858</b> | 1635.727891        | 818.367584       | <b>1634.743875</b> | 817.875576       | 16 |
| 4  | <b>504.212261</b>  | 252.609768      | 487.185712         | 244.096494        | 486.201696         | 243.604486        | M    | <b>1524.695862</b> | 762.851569        | 1507.669313        | 754.338295       | 1506.685297        | 753.846287       | 15 |
| 5  | <b>605.259940</b>  | 303.133608      | 588.233391         | 294.620334        | <b>587.249375</b>  | 294.128326        | T    | <b>1377.660462</b> | 689.333869        | 1360.633913        | 680.820595       | 1359.649897        | 680.328587       | 14 |
| 6  | <b>733.318518</b>  | 367.162897      | <b>716.291969</b>  | 358.649623        | 715.307953         | 358.157615        | Q    | <b>1276.612783</b> | 638.810030        | <b>1259.586234</b> | 630.296755       | 1258.602218        | 629.804747       | 13 |
| 7  | <b>820.350546</b>  | 410.678911      | 803.323997         | 402.165637        | <b>802.339981</b>  | 401.673629        | S    | <b>1148.554205</b> | 574.780741        | 1131.527656        | 566.267466       | 1130.543640        | 565.775458       | 12 |
| 8  | 917.403310         | 459.205293      | 900.376761         | 450.692019        | 899.392745         | 450.200011        | P    | <b>1061.522177</b> | 531.264727        | 1044.495628        | 522.751452       | <b>1043.511612</b> | 522.259444       | 11 |
| 9  | 1004.435338        | 502.721307      | 987.408789         | 494.208033        | 986.424773         | 493.716025        | S    | <b>964.469413</b>  | 482.738345        | 947.442864         | 474.225070       | 946.458848         | 473.733062       | 10 |
| 10 | 1091.467366        | 546.237321      | 1074.440817        | 537.724047        | 1073.456801        | 537.232039        | S    | 877.437385         | 439.222331        | 860.410836         | 430.709056       | 859.426820         | 430.217048       | 9  |
| 11 | <b>1190.535780</b> | 595.771528      | 1173.509231        | <b>587.258254</b> | <b>1172.525215</b> | <b>586.766246</b> | V    | 790.405357         | 395.706317        | 773.378808         | 387.193042       | 772.394792         | 386.701034       | 8  |
| 12 | 1277.567808        | 639.287542      | 1260.541259        | 630.774268        | <b>1259.557243</b> | 630.282260        | S    | <b>691.336943</b>  | 346.172110        | 674.310394         | 337.658835       | 673.326378         | 337.166827       | 7  |
| 13 | <b>1348.604922</b> | 674.806099      | 1331.578373        | 666.292825        | 1330.594357        | 665.800817        | A    | <b>604.304915</b>  | 302.656096        | <b>587.278366</b>  | 294.142821       | 586.294350         | 293.650813       | 6  |
| 14 | 1435.636950        | 718.322113      | 1418.610401        | 709.808839        | 1417.626385        | 709.316831        | S    | <b>533.267801</b>  | 267.137539        | 516.241252         | 258.624264       | 515.257236         | 258.132256       | 5  |
| 15 | <b>1534.705364</b> | 767.856320      | <b>1517.678815</b> | 759.343046        | 1516.694799        | 758.851038        | V    | <b>446.235773</b>  | 223.621524        | 429.209224         | 215.108250       | 428.225208         | 214.616242       | 4  |
| 16 | 1591.726828        | 796.367052      | 1574.700279        | 787.853778        | 1573.716263        | 787.361770        | G    | <b>347.167359</b>  | 174.087317        | 330.140810         | 165.574043       | 329.156794         | 165.082035       | 3  |
| 17 | 1706.753771        | 853.880524      | 1689.727222        | 845.367249        | 1688.743206        | 844.875241        | D    | 290.145895         | 145.576585        | 273.119346         | 137.063311       | 272.135330         | 136.571303       | 2  |
| 18 |                    |                 |                    |                   |                    |                   | R    | <b>175.118952</b>  | 88.063114         | 158.092403         | 79.549839        |                    |                  | 1  |

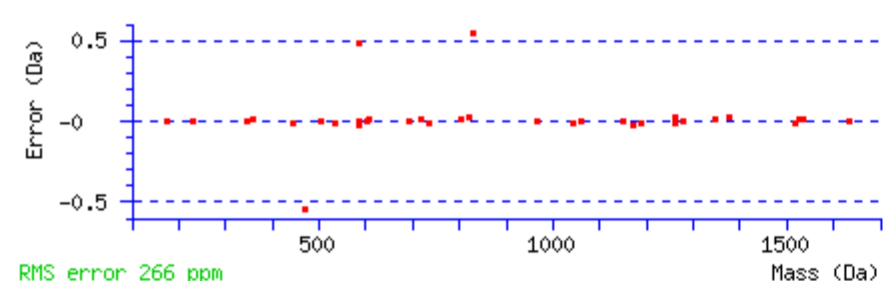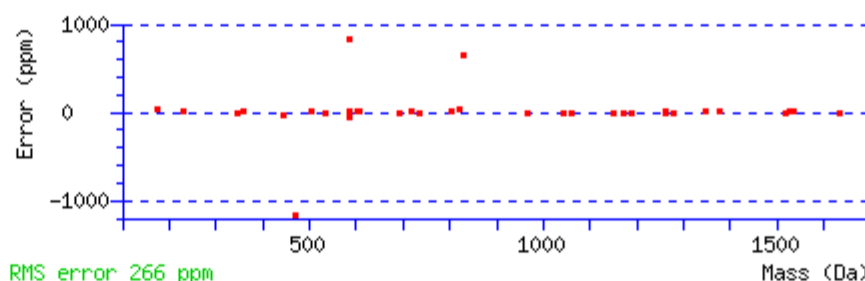

NCBI BLAST search of **DIQMTQSPSSVSASVGDR**  
 (Parameters: blastp, nr protein database, expect=20000, no filter, PAM30)  
 Other BLAST [web gateways](#)

**All matches to this query**

| Score | $M_r(\text{calc})$ : | Delta     | Sequence                           |
|-------|----------------------|-----------|------------------------------------|
| 100.8 | 1879.858185          | -0.004017 | <a href="#">DIQMTQSPSSVSASVGDR</a> |
| 38.3  | 1879.858185          | -0.004017 | <a href="#">DIQMTQSPSSVSASVGDR</a> |
| 16.2  | 1879.858185          | -0.004017 | <a href="#">DVQMTQSPSSLSASVGDR</a> |
| 16.0  | 1879.858185          | -0.004017 | <a href="#">DVQMTQSPSSLSASVGDR</a> |
| 15.4  | 1879.846893          | 0.007275  | <a href="#">ETDSGDKEMAEAISELR</a>  |
| 4.8   | 1879.852295          | 0.001873  | <a href="#">VFHEDCHIPPEAER</a>     |
| 3.2   | 1879.837006          | 0.017162  | <a href="#">TPSECSYYSSRISSAR</a>   |

# MASCOT Search Results

## Peptide View

MS/MS Fragmentation of **FSGSGSGTDFTLK**

Found in **KV201\_HUMAN**, Ig kappa chain V-II region Cum OS=Homo sapiens PE=1 SV=1

Match to Query 36233: 1302.603688 from(652.309120,2+) rtinseconds(2150) index(23881)

Title: Locus:1.1.1.2134.37

Data file 2011-11-10 - TFD - EP 4-5.mgf

Click mouse within plot area to zoom in by factor of two about that point

Or, Plot from  to  Da

Label all possible matches  Label matches used for scoring

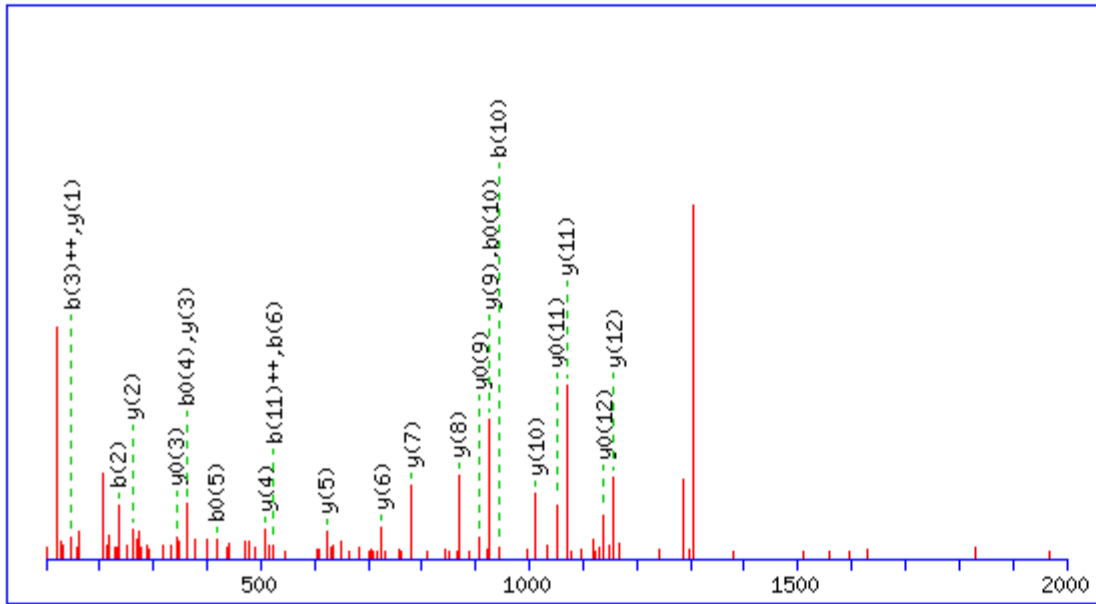

Monoisotopic mass of neutral peptide Mr(calc): 1302.609222

Fixed modifications: Propionamide (C) (apply to specified residues or termini only)

Ions Score: 101 Expect: 9.7e-010

Matches : 24/114 fragment ions using 36 most intense peaks ([help](#))

| #  | b                 | b <sup>++</sup>   | b <sup>0</sup>    | b <sup>0++</sup> | Seq. | y                  | y <sup>++</sup> | y <sup>*</sup> | y <sup>*++</sup> | y <sup>0</sup>     | y <sup>0++</sup> | #  |
|----|-------------------|-------------------|-------------------|------------------|------|--------------------|-----------------|----------------|------------------|--------------------|------------------|----|
| 1  | 148.075690        | 74.541483         |                   |                  | F    |                    |                 |                |                  |                    |                  | 13 |
| 2  | <b>235.107718</b> | 118.057497        | 217.097153        | 109.052214       | S    | <b>1156.548059</b> | 578.777667      | 1139.521510    | 570.264393       | <b>1138.537494</b> | 569.772385       | 12 |
| 3  | 292.129182        | <b>146.568229</b> | 274.118617        | 137.562946       | G    | <b>1069.516031</b> | 535.261653      | 1052.489482    | 526.748379       | <b>1051.505466</b> | 526.256371       | 11 |
| 4  | 379.161210        | 190.084243        | <b>361.150645</b> | 181.078960       | S    | <b>1012.494567</b> | 506.750921      | 995.468018     | 498.237647       | 994.484002         | 497.745639       | 10 |
| 5  | 436.182674        | 218.594975        | <b>418.172109</b> | 209.589692       | G    | <b>925.462539</b>  | 463.234907      | 908.435990     | 454.721633       | <b>907.451974</b>  | 454.229625       | 9  |
| 6  | <b>523.214702</b> | 262.110989        | 505.204137        | 253.105707       | S    | <b>868.441075</b>  | 434.724176      | 851.414526     | 426.210901       | 850.430510         | 425.718893       | 8  |
| 7  | 580.236166        | 290.621721        | 562.225601        | 281.616439       | G    | <b>781.409047</b>  | 391.208161      | 764.382498     | 382.694887       | 763.398482         | 382.202879       | 7  |
| 8  | 681.283845        | 341.145561        | 663.273280        | 332.140278       | T    | <b>724.387583</b>  | 362.697429      | 707.361034     | 354.184155       | 706.377018         | 353.692147       | 6  |
| 9  | 796.310788        | 398.659032        | 778.300223        | 389.653750       | D    | <b>623.339904</b>  | 312.173590      | 606.313355     | 303.660315       | 605.329339         | 303.168307       | 5  |
| 10 | <b>943.379202</b> | 472.193239        | <b>925.368637</b> | 463.187956       | F    | <b>508.312961</b>  | 254.660118      | 491.286412     | 246.146844       | 490.302396         | 245.654836       | 4  |
| 11 | 1044.426881       | <b>522.717078</b> | 1026.416316       | 513.711796       | T    | <b>361.244547</b>  | 181.125911      | 344.217998     | 172.612637       | <b>343.233982</b>  | 172.120629       | 3  |
| 12 | 1157.510945       | 579.259110        | 1139.500380       | 570.253828       | L    | <b>260.196868</b>  | 130.602072      | 243.170319     | 122.088797       |                    |                  | 2  |
| 13 |                   |                   |                   |                  | K    | <b>147.112804</b>  | 74.060040       | 130.086255     | 65.546765        |                    |                  | 1  |

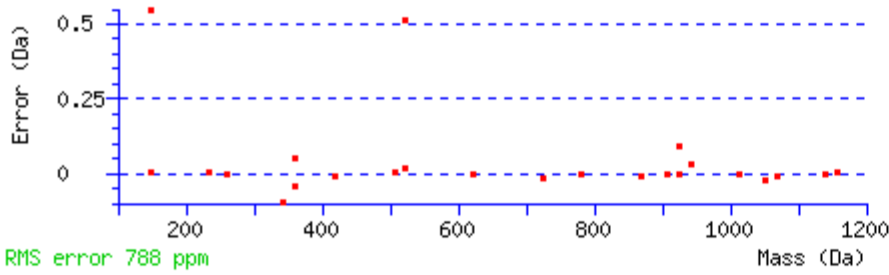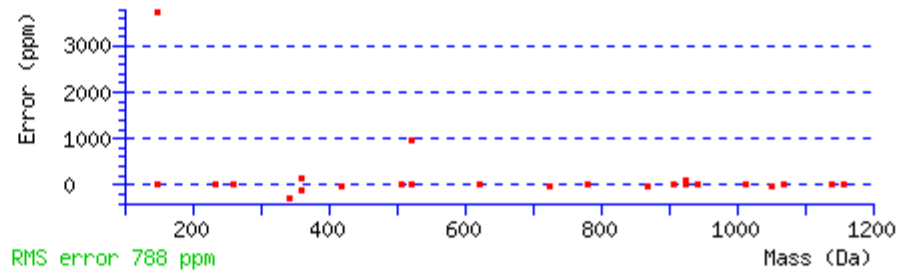

NCBI BLAST search of **FSGSGSGTDFTLK**

(Parameters: blastp, nr protein database, expect=20000, no filter, PAM30)

Other BLAST [web gateways](#)

## All matches to this query

| Score | Mr(calc):   | Delta     | Sequence                      |
|-------|-------------|-----------|-------------------------------|
| 100.5 | 1302.609222 | -0.005534 | <a href="#">FSGSGSGTDFTLK</a> |
| 100.5 | 1302.609222 | -0.005534 | <a href="#">FSGSGSGTDFTLK</a> |
| 5.9   | 1302.602676 | 0.001012  | <a href="#">HPFTGDNCTIK</a>   |
| 3.1   | 1302.593948 | 0.009740  | <a href="#">TDENIDTPGTPK</a>  |

# MASCOT SCIENCE Mascot Search Results

## Peptide View

MS/MS Fragmentation of **LLIYGASTR**

Found in **KV113\_HUMAN**, Ig kappa chain V-I region Lay OS=Homo sapiens PE=1 SV=1

Match to Query 14707: 992.567568 from(497.291060,2+) rtinseconds(2077) index(21905)

Title: Locus:1.1.1.2209.18

Data file 2011-11-13 - TFD - EP 7-5.mgf

Click mouse within plot area to zoom in by factor of two about that point

Or, Plot from  to  Da

Label all possible matches  Label matches used for scoring



Monoisotopic mass of neutral peptide  $M_r(\text{calc})$ : 992.565460

Fixed modifications: Propionamide (C) (apply to specified residues or termini only)

Ions Score: 58 Expect: 7e-006

Matches : 15/66 fragment ions using 22 most intense peaks [\(help\)](#)

| # | b                 | b <sup>++</sup> | b <sup>0</sup> | b <sup>0++</sup> | Seq. | y                 | y <sup>++</sup> | y <sup>*</sup>    | y <sup>+++</sup> | y <sup>0</sup>    | y <sup>0++</sup> | # |
|---|-------------------|-----------------|----------------|------------------|------|-------------------|-----------------|-------------------|------------------|-------------------|------------------|---|
| 1 | 114.091340        | 57.549308       |                |                  | L    |                   |                 |                   |                  |                   |                  | 9 |
| 2 | <b>227.175404</b> | 114.091340      |                |                  | L    | <b>880.488694</b> | 440.747985      | 863.462145        | 432.234711       | 862.478129        | 431.742703       | 8 |
| 3 | <b>340.259468</b> | 170.633372      |                |                  | I    | <b>767.404630</b> | 384.205953      | <b>750.378081</b> | 375.692679       | <b>749.394065</b> | 375.200671       | 7 |
| 4 | <b>503.322797</b> | 252.165036      |                |                  | Y    | <b>654.320566</b> | 327.663921      | <b>637.294017</b> | 319.150647       | 636.310001        | 318.658639       | 6 |
| 5 | 560.344261        | 280.675769      |                |                  | G    | <b>491.257237</b> | 246.132256      | 474.230688        | 237.618982       | 473.246672        | 237.126974       | 5 |
| 6 | 631.381375        | 316.194326      |                |                  | A    | <b>434.235773</b> | 217.621524      | <b>417.209224</b> | 209.108250       | 416.225208        | 208.616242       | 4 |
| 7 | 718.413403        | 359.710340      | 700.402838     | 350.705057       | S    | <b>363.198659</b> | 182.102967      | <b>346.172110</b> | 173.589693       | 345.188094        | 173.097685       | 3 |
| 8 | 819.461082        | 410.234179      | 801.450517     | 401.228897       | T    | 276.166631        | 138.586953      | 259.140082        | 130.073679       | 258.156066        | 129.581671       | 2 |
| 9 |                   |                 |                |                  | R    | <b>175.118952</b> | 88.063114       | 158.092403        | 79.549839        |                   |                  | 1 |



NCBI BLAST search of **LLIYGASTR**

(Parameters: blastp, nr protein database, expect=20000, no filter, PAM30)

Other BLAST [web gateways](#)

## All matches to this query

| Score | $M_r(\text{calc})$ : | Delta     | Sequence                  |
|-------|----------------------|-----------|---------------------------|
| 58.4  | 992.565460           | 0.002108  | <a href="#">LLIYGASTR</a> |
| 58.4  | 992.565460           | 0.002108  | <a href="#">LLIYGATSR</a> |
| 5.9   | 992.576691           | -0.009123 | <a href="#">LRPLPPER</a>  |
| 5.7   | 992.565475           | 0.002093  | <a href="#">EPLHVVATK</a> |
| 4.8   | 992.576691           | -0.009123 | <a href="#">LRPLPPER</a>  |
| 0.9   | 992.565460           | 0.002108  | <a href="#">IPKPELHK</a>  |
| 0.9   | 992.576706           | -0.009138 | <a href="#">LPPRPVNGK</a> |
| 0.8   | 992.576706           | -0.009138 | <a href="#">LIHVLDAGR</a> |
| 0.6   | 992.565460           | 0.002108  | <a href="#">LLQTLSYR</a>  |
| 0.0   | 992.576691           | -0.009123 | <a href="#">LRPLPPER</a>  |

# **MASCOT** Mascot Search Results

## Peptide View

MS/MS Fragmentation of **LLIYDASNR**

Found in **KV309\_HUMAN**, Ig kappa chain V-III region VG (Fragment) OS=Homo sapiens PE=1 SV=1

Match to Query 18062: 1063.569028 from(532.791790,2+) rtinseconds(2115) index(19960)

Title: Locus:1.1.1.2427.24

Data file 2011-11-10 - TFD - EP 3-5.mgf

Click mouse within plot area to zoom in by factor of two about that point

Or, Plot from  to  Da

Label all possible matches  Label matches used for scoring

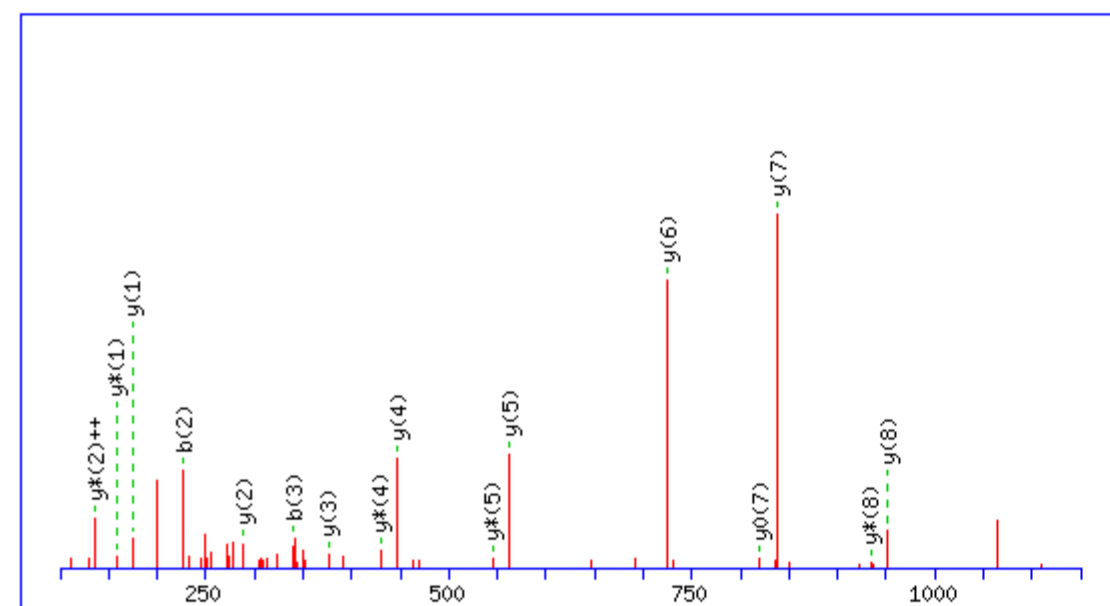

Monoisotopic mass of neutral peptide Mr(calc): 1063.566177

Fixed modifications: Propionamide (C) (apply to specified residues or termini only)

Ions Score: 57 Expect: 1.9e-005

Matches : 16/70 fragment ions using 30 most intense peaks ([help](#))

| # | b                 | b <sup>++</sup> | b <sup>*</sup> | b <sup>*++</sup> | b <sup>0</sup> | b <sup>0++</sup> | Seq. | y                 | y <sup>++</sup> | y <sup>*</sup>    | y <sup>*++</sup>  | y <sup>0</sup>    | y <sup>0++</sup> | # |
|---|-------------------|-----------------|----------------|------------------|----------------|------------------|------|-------------------|-----------------|-------------------|-------------------|-------------------|------------------|---|
| 1 | 114.091340        | 57.549308       |                |                  |                |                  | L    |                   |                 |                   |                   |                   |                  | 9 |
| 2 | <b>227.175404</b> | 114.091340      |                |                  |                |                  | L    | <b>951.489421</b> | 476.248348      | <b>934.462872</b> | 467.735074        | 933.478856        | 467.243066       | 8 |
| 3 | <b>340.259468</b> | 170.633372      |                |                  |                |                  | I    | <b>838.405357</b> | 419.706316      | 821.378808        | 411.193042        | <b>820.394792</b> | 410.701034       | 7 |
| 4 | 503.322797        | 252.165036      |                |                  |                |                  | Y    | <b>725.321293</b> | 363.164285      | 708.294744        | 354.651010        | 707.310728        | 354.159002       | 6 |
| 5 | 618.349740        | 309.678508      |                |                  | 600.339175     | 300.673226       | D    | <b>562.257964</b> | 281.632620      | <b>545.231415</b> | 273.119345        | 544.247399        | 272.627337       | 5 |
| 6 | 689.386854        | 345.197065      |                |                  | 671.376289     | 336.191782       | A    | <b>447.231021</b> | 224.119148      | <b>430.204472</b> | 215.605874        | 429.220456        | 215.113866       | 4 |
| 7 | 776.418882        | 388.713079      |                |                  | 758.408317     | 379.707796       | S    | <b>376.193907</b> | 188.600591      | 359.167358        | 180.087317        | 358.183342        | 179.595309       | 3 |
| 8 | 890.461809        | 445.734542      | 873.435260     | 437.221268       | 872.451244     | 436.729260       | N    | <b>289.161879</b> | 145.084577      | 272.135330        | <b>136.571303</b> |                   |                  | 2 |
| 9 |                   |                 |                |                  |                |                  | R    | <b>175.118952</b> | 88.063114       | <b>158.092403</b> | 79.549839         |                   |                  | 1 |

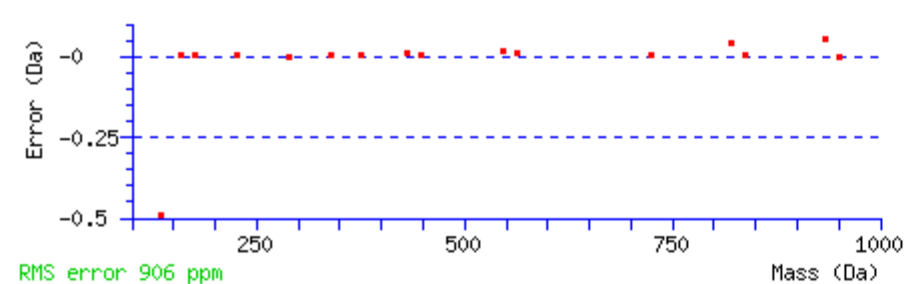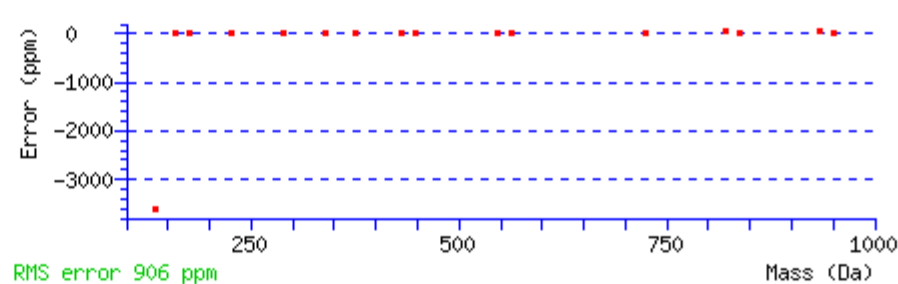

NCBI BLAST search of [LLIYDASNR](#)

(Parameters: blastp, nr protein database, expect=20000, no filter, PAM30)

Other BLAST [web gateways](#)

## All matches to this query

| Score | Mr(calc):   | Delta     | Sequence                  |
|-------|-------------|-----------|---------------------------|
| 57.4  | 1063.566177 | 0.002851  | <a href="#">LLIYDASNR</a> |
| 13.5  | 1063.577408 | -0.008380 | <a href="#">LLPAEAHAR</a> |
| 9.9   | 1063.577423 | -0.008395 | <a href="#">IIALPHDNR</a> |
| 9.8   | 1063.576950 | -0.007922 | <a href="#">IIMGLDKMK</a> |
| 3.4   | 1063.566208 | 0.002820  | <a href="#">ATPLPPSPR</a> |
| 2.0   | 1063.570221 | -0.001193 | <a href="#">LLNAFFDPK</a> |
| 1.8   | 1063.566208 | 0.002820  | <a href="#">ATPLPPSPR</a> |
| 1.7   | 1063.559662 | 0.009366  | <a href="#">LLNRMFDR</a>  |
| 1.6   | 1063.566177 | 0.002851  | <a href="#">LNSAIYDR</a>  |
| 0.9   | 1063.566162 | 0.002866  | <a href="#">IYKENER</a>   |

# **MATRIX** SCIENCE Mascot Search Results

## Peptide View

MS/MS Fragmentation of **FSGSLLGGK**

Found in **LV001\_HUMAN**, Ig lambda chain V region 4A OS=Homo sapiens PE=4 SV=1

Match to Query 4763: 864.477528 from(433.246040,2+) rtinseconds(1984) index(17494)

Title: Locus:1.1.1.2378.8

Data file 2011-11-10 - TFD - EP 3-5.mgf

Click mouse within plot area to zoom in by factor of two about that point

Or, Plot from  to  Da

Label all possible matches  Label matches used for scoring

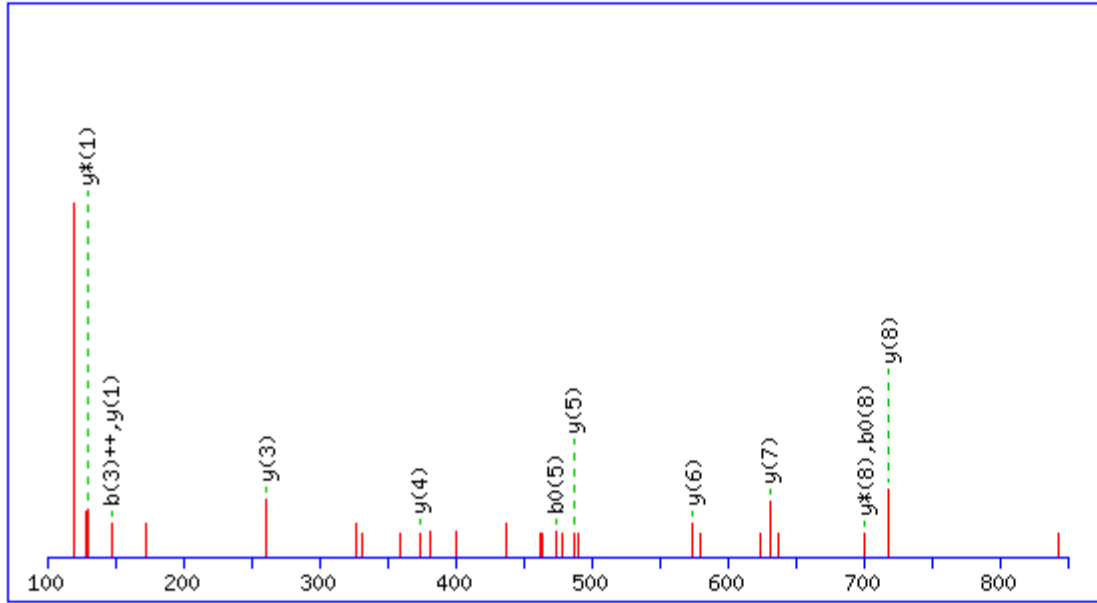

Monoisotopic mass of neutral peptide Mr(calc): 864.470520

Fixed modifications: Propionamide (C) (apply to specified residues or termini only)

Ions Score: 45 Expect: 0.00028

Matches : 12/68 fragment ions using 20 most intense peaks [\(help\)](#)

| # | b          | b <sup>++</sup>   | b <sup>0</sup>    | b <sup>0++</sup> | Seq. | y                 | y <sup>++</sup> | y <sup>*</sup>    | y <sup>*++</sup> | y <sup>0</sup> | y <sup>0++</sup> | # |
|---|------------|-------------------|-------------------|------------------|------|-------------------|-----------------|-------------------|------------------|----------------|------------------|---|
| 1 | 148.075690 | 74.541483         |                   |                  | F    |                   |                 |                   |                  |                |                  | 9 |
| 2 | 235.107718 | 118.057497        | 217.097153        | 109.052214       | S    | <b>718.409380</b> | 359.708328      | <b>701.382831</b> | 351.195054       | 700.398815     | 350.703046       | 8 |
| 3 | 292.129182 | <b>146.568229</b> | 274.118617        | 137.562946       | G    | <b>631.377352</b> | 316.192314      | 614.350803        | 307.679040       | 613.366787     | 307.187032       | 7 |
| 4 | 379.161210 | 190.084243        | 361.150645        | 181.078960       | S    | <b>574.355888</b> | 287.681582      | 557.329339        | 279.168308       | 556.345323     | 278.676300       | 6 |
| 5 | 492.245274 | 246.626275        | <b>474.234709</b> | 237.620992       | L    | <b>487.323860</b> | 244.165568      | 470.297311        | 235.652294       |                |                  | 5 |
| 6 | 605.329338 | 303.168307        | 587.318773        | 294.163025       | L    | <b>374.239796</b> | 187.623536      | 357.213247        | 179.110262       |                |                  | 4 |
| 7 | 662.350802 | 331.679039        | 644.340237        | 322.673757       | G    | <b>261.155732</b> | 131.081504      | 244.129183        | 122.568230       |                |                  | 3 |
| 8 | 719.372266 | 360.189771        | <b>701.361701</b> | 351.184489       | G    | 204.134268        | 102.570772      | 187.107719        | 94.057498        |                |                  | 2 |
| 9 |            |                   |                   |                  | K    | <b>147.112804</b> | 74.060040       | <b>130.086255</b> | 65.546765        |                |                  | 1 |

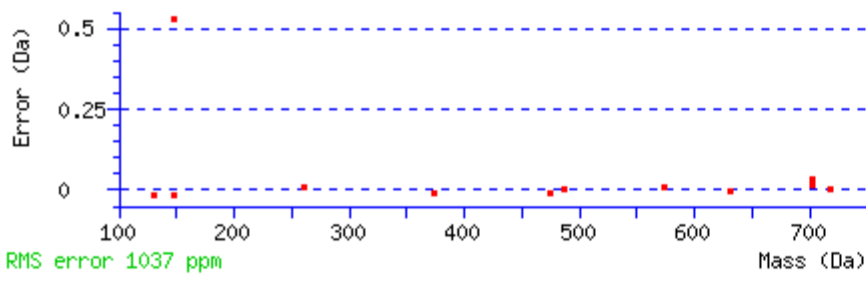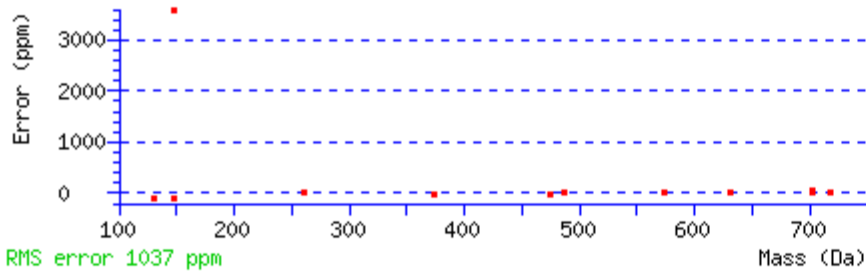

NCBI BLAST search of **FSGSLLGGK**

(Parameters: blastp, nr protein database, expect=20000, no filter, PAM30)

Other BLAST [web gateways](#)

All matches to this query

| Score | Mr(calc):  | Delta     | Sequence                  |
|-------|------------|-----------|---------------------------|
| 44.7  | 864.470520 | 0.007008  | <a href="#">FSGSLLGGK</a> |
| 7.8   | 864.474548 | 0.002980  | <a href="#">FFPDVIK</a>   |
| 3.7   | 864.481735 | -0.004207 | <a href="#">FSIRNTK</a>   |
| 3.1   | 864.473877 | 0.003651  | <a href="#">MNVASSKK</a>  |
| 3.1   | 864.481735 | -0.004207 | <a href="#">HPEKVAGK</a>  |
| 0.7   | 864.481735 | -0.004207 | <a href="#">KIHPDQK</a>   |



# MASCOT Search Results

## Peptide View

MS/MS Fragmentation of **SGTSASLAISGLR**

Found in **LV102\_HUMAN**, Ig lambda chain V-I region HA OS=Homo sapiens PE=1 SV=1

Match to Query 32105: 1218.656188 from(610.335370,2+) rtinseconds(2269) index(26399)

Title: Locus:1.1.1.2185.36

Data file 2011-11-14 - TFD - EP 8-5.mgf

Click mouse within plot area to zoom in by factor of two about that point

Or, Plot from  to  Da

Label all possible matches  Label matches used for scoring

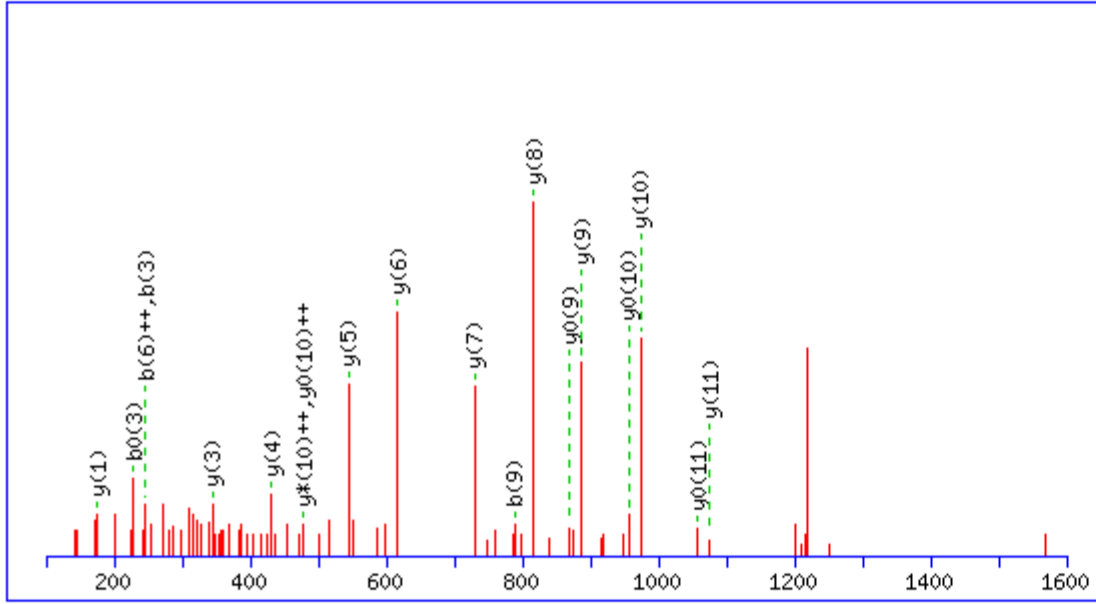

Monoisotopic mass of neutral peptide Mr(calc): 1218.656799

Fixed modifications: Propionamide (C) (apply to specified residues or termini only)

Ions Score: 100 Expect: 1.1e-009

Matches : 19/114 fragment ions using 21 most intense peaks [\(help\)](#)

| #  | b                 | b <sup>++</sup>   | b <sup>0</sup>    | b <sup>0++</sup> | Seq. | y                  | y <sup>++</sup> | y <sup>*</sup> | y <sup>*++</sup>  | y <sup>0</sup>     | y <sup>0++</sup>  | #  |
|----|-------------------|-------------------|-------------------|------------------|------|--------------------|-----------------|----------------|-------------------|--------------------|-------------------|----|
| 1  | 88.039304         | 44.523290         | 70.028739         | 35.518008        | S    |                    |                 |                |                   |                    |                   | 13 |
| 2  | 145.060768        | 73.034022         | 127.050203        | 64.028740        | G    | 1132.632063        | 566.819669      | 1115.605514    | 558.306395        | 1114.621498        | 557.814387        | 12 |
| 3  | <b>246.108447</b> | 123.557862        | <b>228.097882</b> | 114.552579       | T    | <b>1075.610599</b> | 538.308937      | 1058.584050    | 529.795663        | <b>1057.600034</b> | 529.303655        | 11 |
| 4  | 333.140475        | 167.073875        | 315.129910        | 158.068593       | S    | <b>974.562920</b>  | 487.785098      | 957.536371     | <b>479.271823</b> | <b>956.552355</b>  | <b>478.779815</b> | 10 |
| 5  | 404.177589        | 202.592432        | 386.167024        | 193.587150       | A    | <b>887.530892</b>  | 444.269084      | 870.504343     | 435.755809        | <b>869.520327</b>  | 435.263801        | 9  |
| 6  | 491.209617        | <b>246.108446</b> | 473.199052        | 237.103164       | S    | <b>816.493778</b>  | 408.750527      | 799.467229     | 400.237252        | 798.483213         | 399.745244        | 8  |
| 7  | 604.293681        | 302.650479        | 586.283116        | 293.645196       | L    | <b>729.461750</b>  | 365.234513      | 712.435201     | 356.721238        | 711.451185         | 356.229230        | 7  |
| 8  | 675.330795        | 338.169036        | 657.320230        | 329.163753       | A    | <b>616.377686</b>  | 308.692481      | 599.351137     | 300.179206        | 598.367121         | 299.687198        | 6  |
| 9  | <b>788.414859</b> | 394.711068        | 770.404294        | 385.705785       | I    | <b>545.340572</b>  | 273.173924      | 528.314023     | 264.660649        | 527.330007         | 264.168641        | 5  |
| 10 | 875.446887        | 438.227082        | 857.436322        | 429.221799       | S    | <b>432.256508</b>  | 216.631892      | 415.229959     | 208.118617        | 414.245943         | 207.626609        | 4  |
| 11 | 932.468351        | 466.737814        | 914.457786        | 457.732531       | G    | <b>345.224480</b>  | 173.115878      | 328.197931     | 164.602603        |                    |                   | 3  |
| 12 | 1045.552415       | 523.279845        | 1027.541850       | 514.274563       | L    | 288.203016         | 144.605146      | 271.176467     | 136.091871        |                    |                   | 2  |
| 13 |                   |                   |                   |                  | R    | <b>175.118952</b>  | 88.063114       | 158.092403     | 79.549839         |                    |                   | 1  |

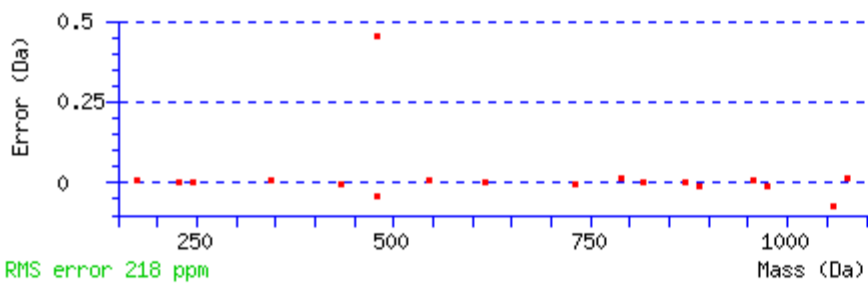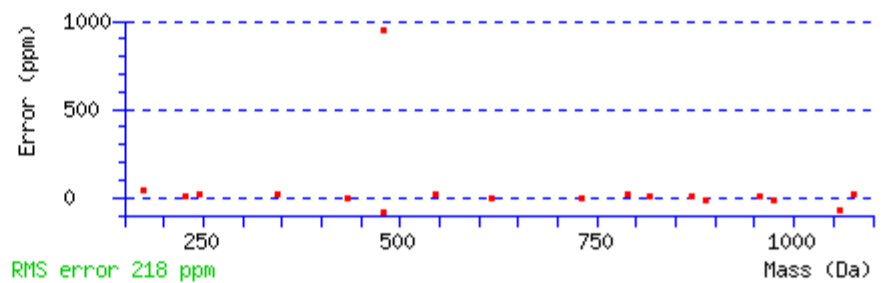

NCBI BLAST search of **SGTSASLAISGLR**

(Parameters: blastp, nr protein database, expect=20000, no filter, PAM30)

Other BLAST [web gateways](#)

### All matches to this query

| Score | Mr(calc):   | Delta     | Sequence                      |
|-------|-------------|-----------|-------------------------------|
| 99.8  | 1218.656799 | -0.000611 | <a href="#">SGTSASLAISGLR</a> |
| 5.1   | 1218.660812 | -0.004624 | <a href="#">AEFQAKIDAVK</a>   |
| 2.4   | 1218.649597 | 0.006591  | <a href="#">IAEGPYIDVVK</a>   |
| 2.2   | 1218.650940 | 0.005248  | <a href="#">FYRPPTPGLR</a>    |
| 1.9   | 1218.654297 | 0.001891  | <a href="#">GGCIPFLKAAR</a>   |
| 1.5   | 1218.662170 | -0.005982 | <a href="#">KPRGWSFGIR</a>    |
| 0.1   | 1218.650940 | 0.005248  | <a href="#">FYRPPTPGLR</a>    |

# MASCOT Search Results

## Peptide View

MS/MS Fragmentation of **SYELTQPPSVSVSPGQTAR**  
 Found in **LV403\_HUMAN**, Ig lambda chain V-IV region Hil OS=Homo sapiens PE=1 SV=1

Match to Query 57824: 2002.985682 from(668.669170,3+) rtinseconds(2381) index(28593)  
 Title: Locus:1.1.1.2198.44  
 Data file 2011-11-12 - TFD - EP 6-5.mgf

Click mouse within plot area to zoom in by factor of two about that point

Or, Plot from  to  Da

Label all possible matches  Label matches used for scoring

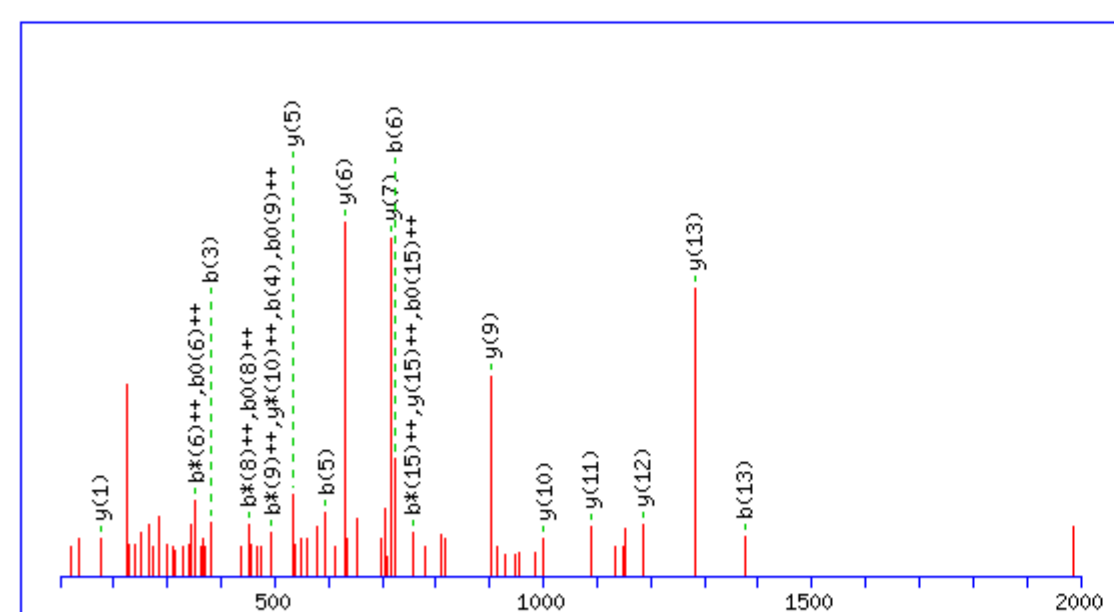

Monoisotopic mass of neutral peptide Mr(calc): 2002.995987  
 Fixed modifications: Propionamide (C) (apply to specified residues or termini only)  
 Ions Score: 66 Expect: 1.1e-006  
 Matches : 24/202 fragment ions using 25 most intense peaks ([help](#))

| #  | b                  | b <sup>++</sup> | b <sup>+</sup> | b <sup>*++</sup>  | b <sup>0</sup> | b <sup>0++</sup>  | Seq. | y                  | y <sup>++</sup>   | y <sup>+</sup> | y <sup>*++</sup>  | y <sup>0</sup> | y <sup>0++</sup> | #  |
|----|--------------------|-----------------|----------------|-------------------|----------------|-------------------|------|--------------------|-------------------|----------------|-------------------|----------------|------------------|----|
| 1  | 88.039304          | 44.523290       |                |                   | 70.028739      | 35.518008         | S    |                    |                   |                |                   |                |                  | 19 |
| 2  | 251.102633         | 126.054954      |                |                   | 233.092068     | 117.049672        | Y    | 1916.971234        | 958.989255        | 1899.944685    | 950.475981        | 1898.960669    | 949.983973       | 18 |
| 3  | <b>380.145226</b>  | 190.576251      |                |                   | 362.134661     | 181.570969        | E    | 1753.907905        | 877.457591        | 1736.881356    | 868.944316        | 1735.897340    | 868.452308       | 17 |
| 4  | <b>493.229290</b>  | 247.118283      |                |                   | 475.218725     | 238.113001        | L    | 1624.865312        | 812.936294        | 1607.838763    | 804.423020        | 1606.854747    | 803.931012       | 16 |
| 5  | <b>594.276969</b>  | 297.642123      |                |                   | 576.266404     | 288.636840        | T    | 1511.781248        | <b>756.394262</b> | 1494.754699    | 747.880988        | 1493.770683    | 747.388980       | 15 |
| 6  | <b>722.335547</b>  | 361.671412      | 705.308998     | <b>353.158137</b> | 704.324982     | <b>352.666129</b> | Q    | 1410.733569        | 705.870423        | 1393.707020    | 697.357148        | 1392.723004    | 696.865140       | 14 |
| 7  | 819.388311         | 410.197794      | 802.361762     | 401.684519        | 801.377746     | 401.192511        | P    | <b>1282.674991</b> | 641.841134        | 1265.648442    | 633.327859        | 1264.664426    | 632.835851       | 13 |
| 8  | 916.441075         | 458.724176      | 899.414526     | <b>450.210901</b> | 898.430510     | <b>449.718893</b> | P    | <b>1185.622227</b> | 593.314752        | 1168.595678    | 584.801477        | 1167.611662    | 584.309469       | 12 |
| 9  | 1003.473103        | 502.240190      | 986.446554     | <b>493.726915</b> | 985.462538     | <b>493.234907</b> | S    | <b>1088.569463</b> | 544.788370        | 1071.542914    | 536.275095        | 1070.558898    | 535.783087       | 11 |
| 10 | 1102.541517        | 551.774397      | 1085.514968    | 543.261122        | 1084.530952    | 542.769114        | V    | <b>1001.537435</b> | 501.272356        | 984.510886     | <b>492.759081</b> | 983.526870     | 492.267073       | 10 |
| 11 | 1189.573545        | 595.290411      | 1172.546996    | 586.777136        | 1171.562980    | 586.285128        | S    | <b>902.469021</b>  | 451.738149        | 885.442472     | 443.224874        | 884.458456     | 442.732866       | 9  |
| 12 | 1288.641959        | 644.824618      | 1271.615410    | 636.311343        | 1270.631394    | 635.819335        | V    | 815.436993         | 408.222135        | 798.410444     | 399.708860        | 797.426428     | 399.216852       | 8  |
| 13 | <b>1375.673987</b> | 688.340632      | 1358.647438    | 679.827357        | 1357.663422    | 679.335349        | S    | <b>716.368579</b>  | 358.687928        | 699.342030     | 350.174653        | 698.358014     | 349.682645       | 7  |
| 14 | 1472.726751        | 736.867014      | 1455.700202    | 728.353739        | 1454.716186    | 727.861731        | P    | <b>629.336551</b>  | 315.171914        | 612.310002     | 306.658639        | 611.325986     | 306.166631       | 6  |
| 15 | 1529.748215        | 765.377746      | 1512.721666    | <b>756.864471</b> | 1511.737650    | <b>756.372463</b> | G    | <b>532.283787</b>  | 266.645532        | 515.257238     | 258.132257        | 514.273222     | 257.640249       | 5  |
| 16 | 1657.806793        | 829.407035      | 1640.780244    | 820.893760        | 1639.796228    | 820.401752        | Q    | 475.262323         | 238.134800        | 458.235774     | 229.621525        | 457.251758     | 229.129517       | 4  |
| 17 | 1758.854472        | 879.930874      | 1741.827923    | 871.417600        | 1740.843907    | 870.925592        | T    | 347.203745         | 174.105510        | 330.177196     | 165.592236        | 329.193180     | 165.100228       | 3  |
| 18 | 1829.891586        | 915.449431      | 1812.865037    | 906.936157        | 1811.881021    | 906.444149        | A    | 246.156066         | 123.581671        | 229.129517     | 115.068396        |                |                  | 2  |
| 19 |                    |                 |                |                   |                |                   | R    | <b>175.118952</b>  | 88.063114         | 158.092403     | 79.549839         |                |                  | 1  |

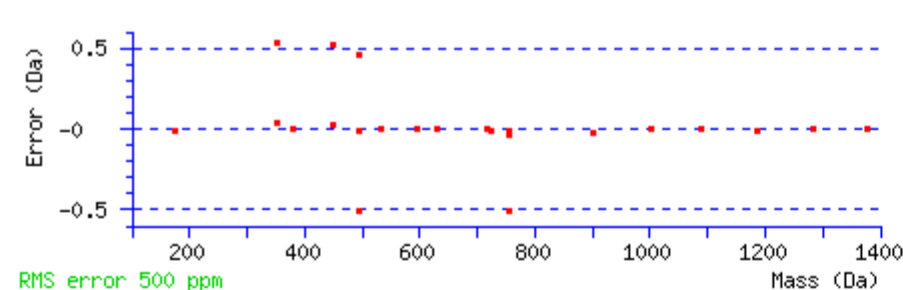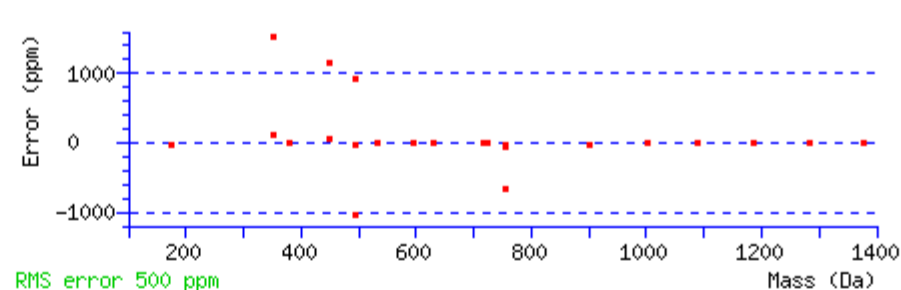

NCBI BLAST search of [SYELTQPPSVSVSPGQTAR](#)  
 (Parameters: blastp, nr protein database, expect=20000, no filter, PAM30)  
 Other BLAST [web gateways](#)

### All matches to this query

| Score | Mr(calc):   | Delta     | Sequence                              |
|-------|-------------|-----------|---------------------------------------|
| 66.2  | 2002.995987 | -0.010305 | <a href="#">SYELTQPPSVSVSPGQTAR</a>   |
| 2.3   | 2002.991959 | -0.006277 | <a href="#">ASSKPATSGPSSAVVPNTSSR</a> |
| 1.9   | 2002.970856 | 0.014826  | <a href="#">LED SGVHVII GGHDSPSR</a>  |
| 1.2   | 2002.971680 | 0.014002  | <a href="#">HAPGAHG GPGEMAAMIEVKK</a> |
| 0.8   | 2002.971695 | 0.013987  | <a href="#">GAVAMAPEMLPKHPHPTPR</a>   |
| 0.5   | 2002.989426 | -0.003744 | <a href="#">SAAKIALMNSVFNEHPSR</a>    |
| 0.4   | 2002.991959 | -0.006277 | <a href="#">ASSKPATSGPSSAVVPNTSSR</a> |
| 0.3   | 2002.967010 | 0.018672  | <a href="#">TAVFVEGGSEVGPPPAQAMK</a>  |
| 0.2   | 2002.967010 | 0.018672  | <a href="#">TAVFVEGGSEVGPPPAQAMK</a>  |
| 0.2   | 2002.967010 | 0.018672  | <a href="#">TAVFVEGGSEVGPPPAQAMK</a>  |

# MASCOT SCIENCE Mascot Search Results

## Peptide View

MS/MS Fragmentation of **SQLMNLIR**

Found in **IR3IP\_HUMAN**, Immediate early response 3-interacting protein 1 OS=Homo sapiens GN=IER3IP1 PE=1 SV=1

Match to Query 10685: 989.536848 from(495.775700,2+) rtinseconds(2175) index(11259)

Title: Locus:1.1.1.2344.13

Data file 2011-11-12 - TFD - EP 6-8.mgf

Click mouse within plot area to zoom in by factor of two about that point

Or, Plot from  to  Da

Label all possible matches  Label matches used for scoring

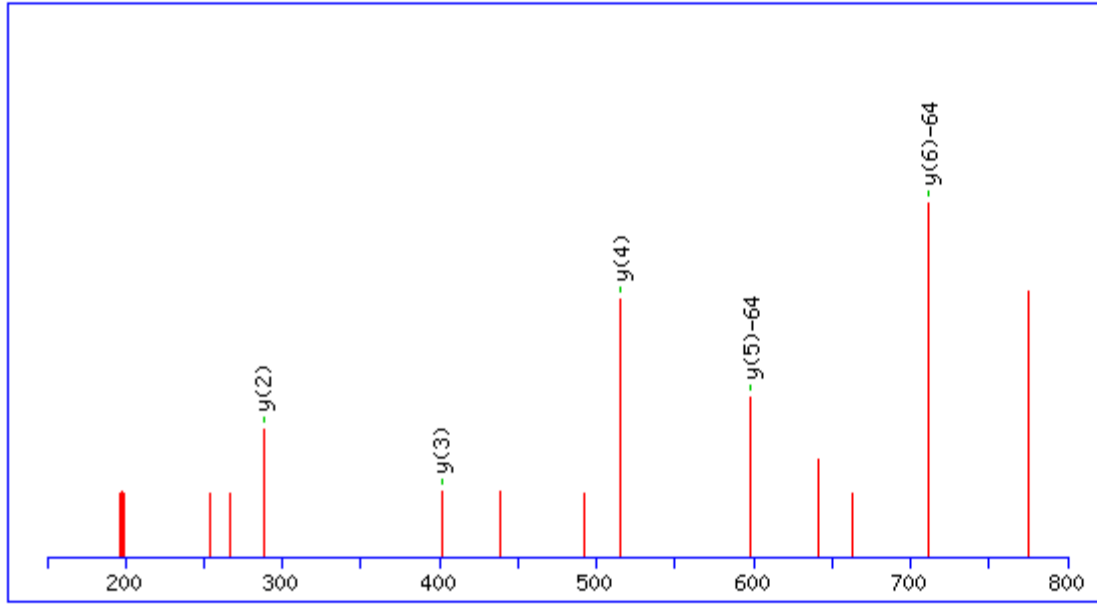

Monoisotopic mass of neutral peptide  $M_r(\text{calc})$ : 989.532776

Fixed modifications: Propionamide (C) (apply to specified residues or termini only)

Variable modifications:

M4 : Oxidation (M), with neutral losses 63.998285 (shown in table), 0.000000

Ions Score: 52 Expect: 8.3e-005

Matches : 5/104 fragment ions using 5 most intense peaks ([help](#))

| # | b          | b <sup>++</sup> | b <sup>*</sup> | b <sup>*++</sup> | b <sup>0</sup> | b <sup>0++</sup> | Seq. | y                 | y <sup>++</sup> | y <sup>*</sup> | y <sup>*++</sup> | # |
|---|------------|-----------------|----------------|------------------|----------------|------------------|------|-------------------|-----------------|----------------|------------------|---|
| 1 | 88.039304  | 44.523290       |                |                  | 70.028739      | 35.518008        | S    |                   |                 |                |                  | 8 |
| 2 | 216.097882 | 108.552579      | 199.071333     | 100.039305       | 198.087317     | 99.547296        | Q    | 839.509764        | 420.258520      | 822.483215     | 411.745246       | 7 |
| 3 | 329.181946 | 165.094611      | 312.155397     | 156.581336       | 311.171381     | 156.089328       | L    | <b>711.451186</b> | 356.229231      | 694.424637     | 347.715957       | 6 |
| 4 | 412.219061 | 206.613168      | 395.192512     | 198.099894       | 394.208496     | 197.607886       | M    | <b>598.367122</b> | 299.687199      | 581.340573     | 291.173925       | 5 |
| 5 | 526.261988 | 263.634632      | 509.235439     | 255.121357       | 508.251423     | 254.629349       | N    | <b>515.330007</b> | 258.168642      | 498.303458     | 249.655367       | 4 |
| 6 | 639.346052 | 320.176664      | 622.319503     | 311.663389       | 621.335487     | 311.171382       | L    | <b>401.287080</b> | 201.147178      | 384.260531     | 192.633904       | 3 |
| 7 | 752.430116 | 376.718696      | 735.403567     | 368.205422       | 734.419551     | 367.713414       | I    | <b>288.203016</b> | 144.605146      | 271.176467     | 136.091872       | 2 |
| 8 |            |                 |                |                  |                |                  | R    | 175.118952        | 88.063114       | 158.092403     | 79.549840        | 1 |

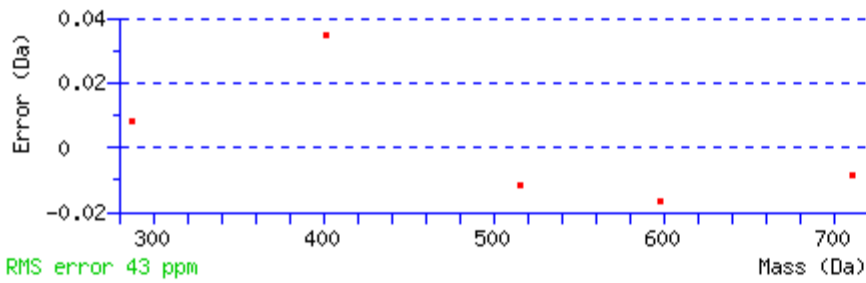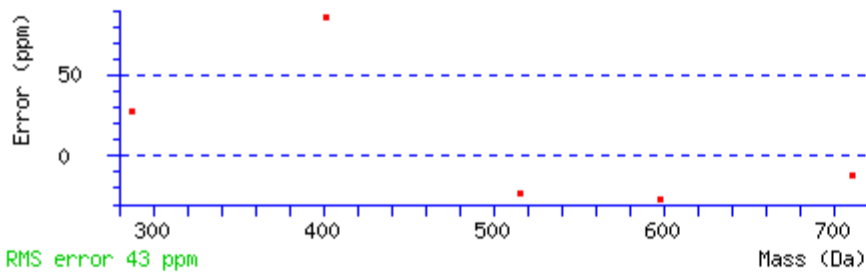

NCBI BLAST search of [SQLMNLIR](#)

(Parameters: blastp, nr protein database, expect=20000, no filter, PAM30)

Other BLAST [web gateways](#)

All matches to this query

| Score | $M_r(\text{calc})$ : | Delta    | Sequence                  |
|-------|----------------------|----------|---------------------------|
| 51.7  | 989.532776           | 0.004072 | <a href="#">SQLMNLIR</a>  |
| 16.1  | 989.532776           | 0.004072 | <a href="#">SISINLMGR</a> |
| 8.3   | 989.532791           | 0.004057 | <a href="#">CSVQTLR</a>   |
| 4.3   | 989.532776           | 0.004072 | <a href="#">NTIMRDLK</a>  |
| 2.7   | 989.532791           | 0.004057 | <a href="#">SQQMLVR</a>   |
| 1.5   | 989.529434           | 0.007414 | <a href="#">AFGSLGGLR</a> |

# MASCOT SEARCH RESULTS

## Peptide View

MS/MS Fragmentation of **NLRPGDSQTAAQAR**

Found in **IRGQ\_HUMAN**, Immunity-related GTPase family Q protein OS=Homo sapiens GN=IRGQ PE=1 SV=1

Match to Query 39325: 1483.742412 from(495.588080,3+) rtinseconds(911) index(1329)

Title: Locus:1.1.1.1857.26

Data file 2011-11-12 - TFD - EP 5-3.mgf

Click mouse within plot area to zoom in by factor of two about that point

Or, Plot from  to  Da

Label all possible matches  Label matches used for scoring

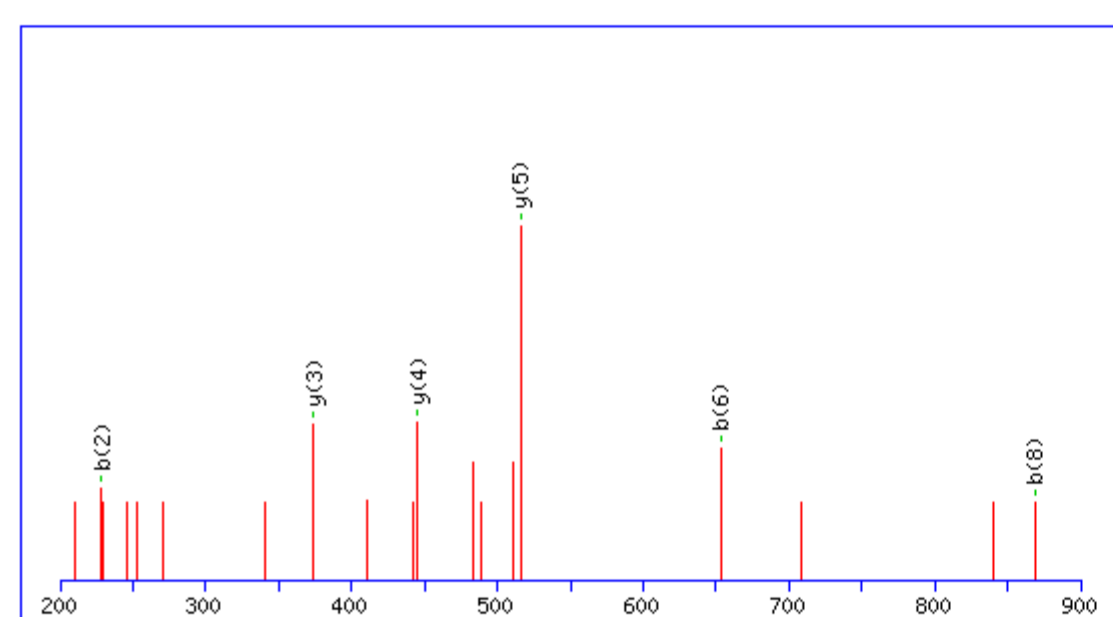

Monoisotopic mass of neutral peptide Mr(calc): 1483.749130

Fixed modifications: Propionamide (C) (apply to specified residues or termini only)

Ions Score: 37 Expect: 0.00053

Matches : 6/136 fragment ions using 6 most intense peaks [\(help\)](#)

| #  | b                 | b <sup>++</sup> | b <sup>*</sup> | b <sup>+++</sup> | b <sup>0</sup> | b <sup>0++</sup> | Seq. | y                 | y <sup>++</sup> | y <sup>*</sup> | y <sup>+++</sup> | y <sup>0</sup> | y <sup>0++</sup> | #  |
|----|-------------------|-----------------|----------------|------------------|----------------|------------------|------|-------------------|-----------------|----------------|------------------|----------------|------------------|----|
| 1  | 115.050203        | 58.028740       | 98.023654      | 49.515465        |                |                  | N    |                   |                 |                |                  |                |                  | 14 |
| 2  | <b>228.134267</b> | 114.570771      | 211.107718     | 106.057497       |                |                  | L    | 1370.713503       | 685.860390      | 1353.686954    | 677.347115       | 1352.702938    | 676.855107       | 13 |
| 3  | 384.235378        | 192.621327      | 367.208829     | 184.108053       |                |                  | R    | 1257.629439       | 629.318357      | 1240.602890    | 620.805083       | 1239.618874    | 620.313075       | 12 |
| 4  | 481.288142        | 241.147709      | 464.261593     | 232.634435       |                |                  | P    | 1101.528328       | 551.267802      | 1084.501779    | 542.754527       | 1083.517763    | 542.262519       | 11 |
| 5  | 538.309606        | 269.658441      | 521.283057     | 261.145167       |                |                  | G    | 1004.475564       | 502.741420      | 987.449015     | 494.228145       | 986.464999     | 493.736137       | 10 |
| 6  | <b>653.336549</b> | 327.171913      | 636.310000     | 318.658638       | 635.325984     | 318.166630       | D    | 947.454100        | 474.230688      | 930.427551     | 465.717413       | 929.443535     | 465.225405       | 9  |
| 7  | 740.368577        | 370.687927      | 723.342028     | 362.174652       | 722.358012     | 361.682644       | S    | 832.427157        | 416.717216      | 815.400608     | 408.203942       | 814.416592     | 407.711934       | 8  |
| 8  | <b>868.427155</b> | 434.717216      | 851.400606     | 426.203941       | 850.416590     | 425.711933       | Q    | 745.395129        | 373.201202      | 728.368580     | 364.687928       | 727.384564     | 364.195920       | 7  |
| 9  | 969.474834        | 485.241055      | 952.448285     | 476.727781       | 951.464269     | 476.235773       | T    | 617.336551        | 309.171913      | 600.310002     | 300.658639       | 599.325986     | 300.166631       | 6  |
| 10 | 1040.511948       | 520.759612      | 1023.485399    | 512.246337       | 1022.501383    | 511.754330       | A    | <b>516.288872</b> | 258.648074      | 499.262323     | 250.134799       |                |                  | 5  |
| 11 | 1111.549062       | 556.278169      | 1094.522513    | 547.764895       | 1093.538497    | 547.272887       | A    | <b>445.251758</b> | 223.129517      | 428.225209     | 214.616242       |                |                  | 4  |
| 12 | 1239.607640       | 620.307458      | 1222.581091    | 611.794184       | 1221.597075    | 611.302175       | Q    | <b>374.214644</b> | 187.610960      | 357.188095     | 179.097685       |                |                  | 3  |
| 13 | 1310.644754       | 655.826015      | 1293.618205    | 647.312741       | 1292.634189    | 646.820732       | A    | 246.156066        | 123.581671      | 229.129517     | 115.068396       |                |                  | 2  |
| 14 |                   |                 |                |                  |                |                  | R    | 175.118952        | 88.063114       | 158.092403     | 79.549839        |                |                  | 1  |

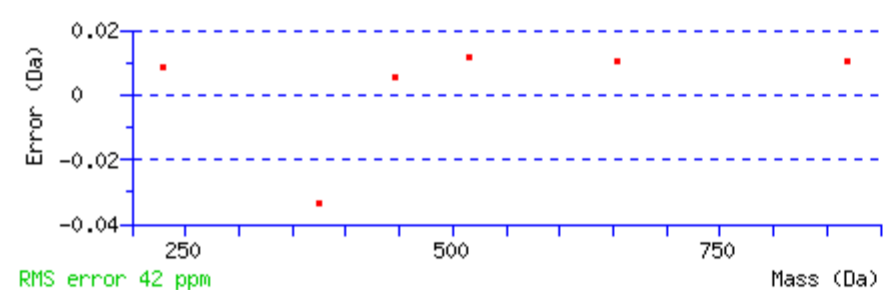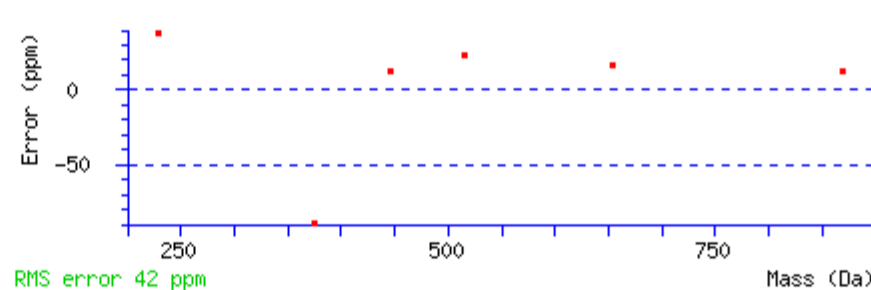

NCBI BLAST search of [NLRPGDSQTAAQAR](#)

(Parameters: blastp, nr protein database, expect=20000, no filter, PAM30)

Other BLAST [web gateways](#)

### All matches to this query

| Score | Mr(calc):   | Delta     | Sequence                       |
|-------|-------------|-----------|--------------------------------|
| 37.4  | 1483.749130 | -0.006718 | <a href="#">NLRPGDSQTAAQAR</a> |
| 2.4   | 1483.738098 | 0.004314  | <a href="#">YLPGPLQDMFKK</a>   |
| 1.4   | 1483.746628 | -0.004216 | <a href="#">ACAQAGRPLQGWR</a>  |
| 1.4   | 1483.752701 | -0.010289 | <a href="#">FTMLALRDLGMGK</a>  |
| 1.0   | 1483.737930 | 0.004482  | <a href="#">VQHSPTSPGARSVK</a> |

**Peptide View**

MS/MS Fragmentation of **HNYRELTQR**

Found in **IGS10\_HUMAN**, Immunoglobulin superfamily member 10 OS=Homo sapiens GN=IGSF10 PE=1 SV=1

Match to Query 37614: 1328.707602 from(443.909810,3+) rtinseconds(2120) index(25247)

Title: Locus:1.1.1.2125.8

Data file 2011-11-12 - TFD - EP 6-1.mgf

Click mouse within plot area to zoom in by factor of two about that point

Or, Plot from  to  Da

Label all possible matches  Label matches used for scoring

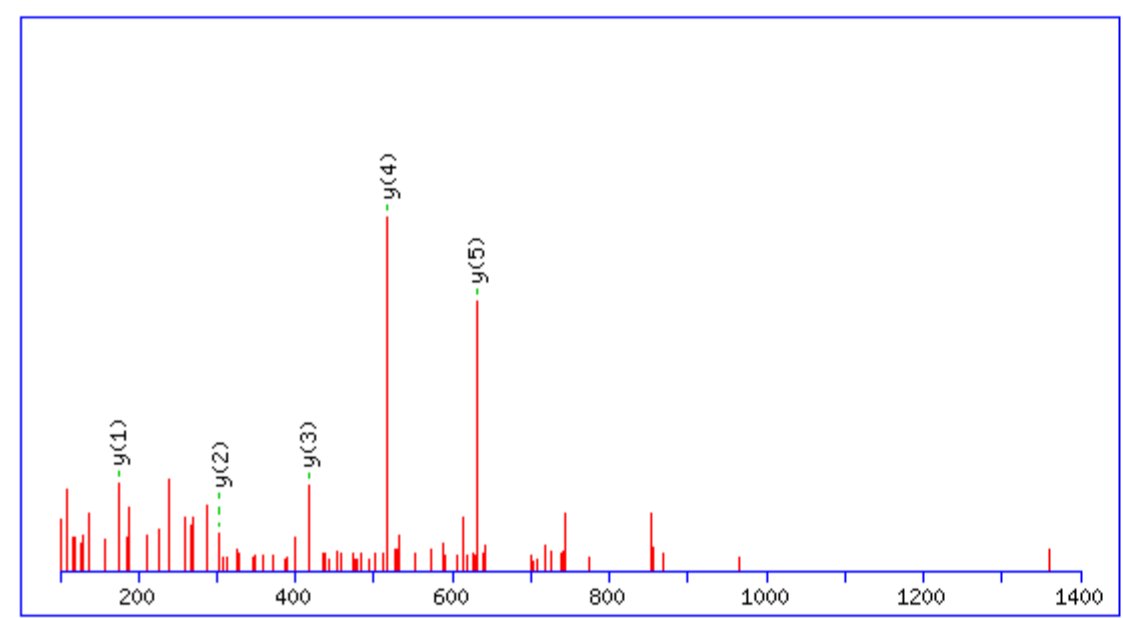

Monoisotopic mass of neutral peptide Mr(calc): 1328.694901

Fixed modifications: Propionamide (C) (apply to specified residues or termini only)

Ions Score: 30 Expect: 0.011

Matches : 5/92 fragment ions using 9 most intense peaks [\(help\)](#)

| #  | b           | b <sup>++</sup> | b <sup>*</sup> | b <sup>*++</sup> | b <sup>0</sup> | b <sup>0++</sup> | Seq. | y                 | y <sup>++</sup> | y <sup>*</sup> | y <sup>*++</sup> | y <sup>0</sup> | y <sup>0++</sup> | #  |
|----|-------------|-----------------|----------------|------------------|----------------|------------------|------|-------------------|-----------------|----------------|------------------|----------------|------------------|----|
| 1  | 138.066188  | 69.536732       |                |                  |                |                  | H    |                   |                 |                |                  |                |                  | 10 |
| 2  | 252.109115  | 126.558195      | 235.082566     | 118.044921       |                |                  | N    | 1192.643297       | 596.825286      | 1175.616748    | 588.312012       | 1174.632732    | 587.820004       | 9  |
| 3  | 415.172444  | 208.089860      | 398.145895     | 199.576585       |                |                  | Y    | 1078.600370       | 539.803823      | 1061.573821    | 531.290549       | 1060.589805    | 530.798540       | 8  |
| 4  | 571.273555  | 286.140416      | 554.247006     | 277.627141       |                |                  | R    | 915.537041        | 458.272158      | 898.510492     | 449.758884       | 897.526476     | 449.266876       | 7  |
| 5  | 700.316148  | 350.661712      | 683.289599     | 342.148438       | 682.305583     | 341.656430       | E    | 759.435930        | 380.221603      | 742.409381     | 371.708328       | 741.425365     | 371.216320       | 6  |
| 6  | 813.400212  | 407.203744      | 796.373663     | 398.690470       | 795.389647     | 398.198462       | L    | <b>630.393337</b> | 315.700306      | 613.366788     | 307.187032       | 612.382772     | 306.695024       | 5  |
| 7  | 914.447891  | 457.727584      | 897.421342     | 449.214309       | 896.437326     | 448.722301       | T    | <b>517.309273</b> | 259.158274      | 500.282724     | 250.645000       | 499.298708     | 250.152992       | 4  |
| 8  | 1027.531955 | 514.269615      | 1010.505406    | 505.756341       | 1009.521390    | 505.264333       | L    | <b>416.261594</b> | 208.634435      | 399.235045     | 200.121160       |                |                  | 3  |
| 9  | 1155.590533 | 578.298904      | 1138.563984    | 569.785630       | 1137.579968    | 569.293622       | Q    | <b>303.177530</b> | 152.092403      | 286.150981     | 143.579128       |                |                  | 2  |
| 10 |             |                 |                |                  |                |                  | R    | <b>175.118952</b> | 88.063114       | 158.092403     | 79.549839        |                |                  | 1  |

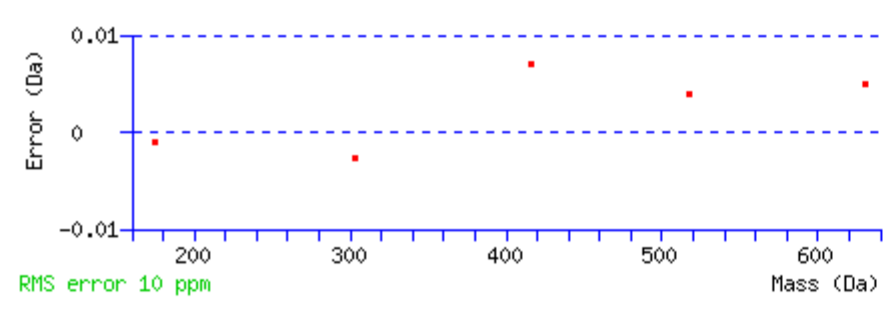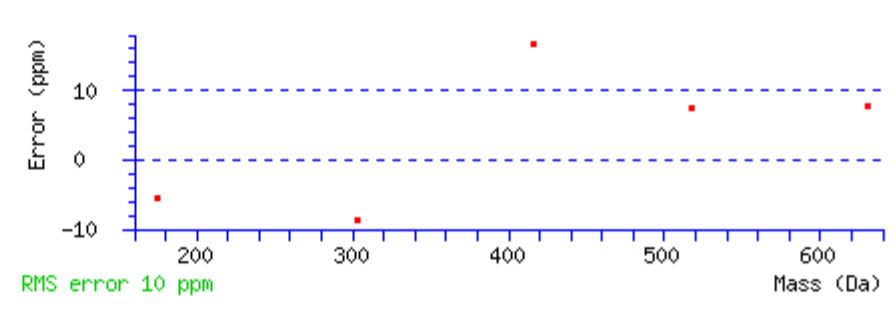

NCBI BLAST search of [HNYRELTQR](#)

(Parameters: blastp, nr protein database, expect=20000, no filter, PAM30)

Other BLAST [web gateways](#)

**All matches to this query**

| Score | Mr(calc):   | Delta     | Sequence                      |
|-------|-------------|-----------|-------------------------------|
| 30.1  | 1328.694901 | 0.012701  | <a href="#">HNYRELTQR</a>     |
| 16.6  | 1328.708862 | -0.001260 | <a href="#">FGIGPPVETIQR</a>  |
| 16.6  | 1328.708862 | -0.001260 | <a href="#">FGIGPPVETIQR</a>  |
| 9.0   | 1328.712219 | -0.004617 | <a href="#">MVIQDIPAVTSR</a>  |
| 8.6   | 1328.718750 | -0.011148 | <a href="#">VSSPLSPLSPGIK</a> |
| 7.4   | 1328.716049 | -0.008447 | <a href="#">VSRASSVAGDKPR</a> |
| 6.8   | 1328.704788 | 0.002814  | <a href="#">AEDLASGILRER</a>  |
| 6.4   | 1328.704803 | 0.002799  | <a href="#">QSVEADINGLRK</a>  |
| 6.4   | 1328.708832 | -0.001230 | <a href="#">VSATAAELAPFPR</a> |
| 3.1   | 1328.704803 | 0.002799  | <a href="#">QKADTIQELQR</a>   |

# Mascot Search Results

## Peptide View

MS/MS Fragmentation of **NAVWALSNLCR**

Found in **IMAI\_HUMAN**, Importin subunit alpha-1 OS=Homo sapiens GN=KPNA1 PE=1 SV=3

Match to Query 33874: 1316.669328 from(659.341940,2+) rtinseconds(3043) index(42731)

Title: Locus:1.1.1.2528.31

Data file 2011-11-12 - TFD - EP 6-3.mgf

Click mouse within plot area to zoom in by factor of two about that point

Or, Plot from  to  Da

Label all possible matches  Label matches used for scoring

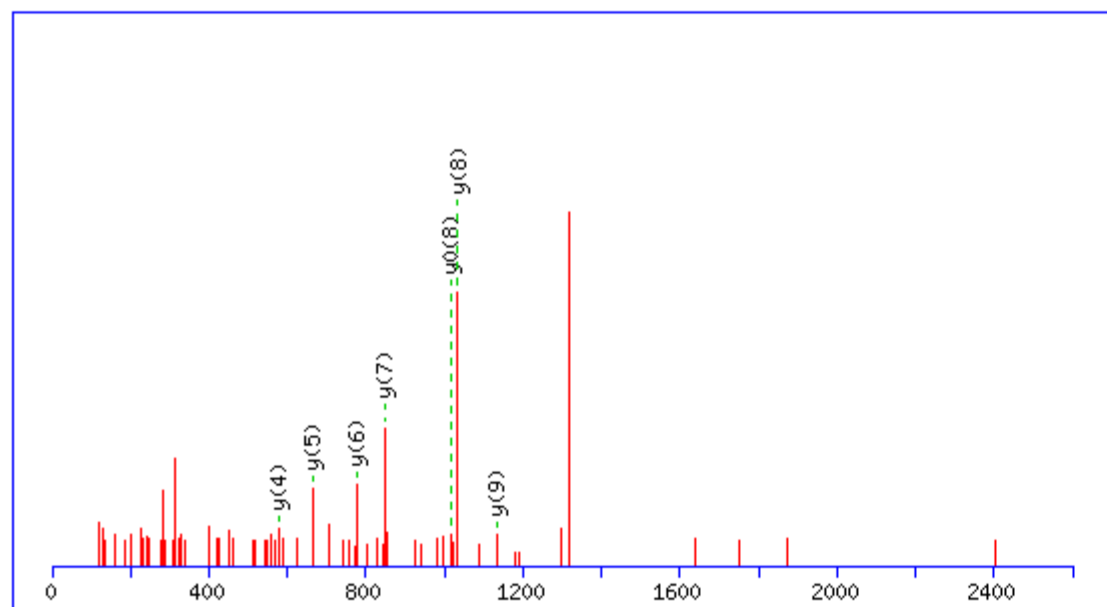

Monoisotopic mass of neutral peptide Mr(calc): 1316.665909

Fixed modifications: Propionamide (C) (apply to specified residues or termini only)

Ions Score: 42 Expect: 0.00057

Matches : 7/100 fragment ions using 12 most intense peaks [\(help\)](#)

| #  | b           | b <sup>++</sup> | b <sup>*</sup> | b <sup>+++</sup> | b <sup>0</sup> | b <sup>0++</sup> | Seq. | y                  | y <sup>++</sup> | y <sup>*</sup> | y <sup>+++</sup> | y <sup>0</sup>     | y <sup>0++</sup> | #  |
|----|-------------|-----------------|----------------|------------------|----------------|------------------|------|--------------------|-----------------|----------------|------------------|--------------------|------------------|----|
| 1  | 115.050203  | 58.028740       | 98.023654      | 49.515465        |                |                  | N    |                    |                 |                |                  |                    |                  | 11 |
| 2  | 186.087317  | 93.547296       | 169.060768     | 85.034022        |                |                  | A    | 1203.630289        | 602.318783      | 1186.603740    | 593.805508       | 1185.619724        | 593.313500       | 10 |
| 3  | 285.155731  | 143.081504      | 268.129182     | 134.568229       |                |                  | V    | <b>1132.593175</b> | 566.800226      | 1115.566626    | 558.286951       | 1114.582610        | 557.794943       | 9  |
| 4  | 471.235044  | 236.121160      | 454.208495     | 227.607886       |                |                  | W    | <b>1033.524761</b> | 517.266019      | 1016.498212    | 508.752744       | <b>1015.514196</b> | 508.260736       | 8  |
| 5  | 542.272158  | 271.639717      | 525.245609     | 263.126443       |                |                  | A    | <b>847.445448</b>  | 424.226362      | 830.418899     | 415.713088       | 829.434883         | 415.221080       | 7  |
| 6  | 655.356222  | 328.181749      | 638.329673     | 319.668475       |                |                  | L    | <b>776.408334</b>  | 388.707805      | 759.381785     | 380.194531       | 758.397769         | 379.702523       | 6  |
| 7  | 742.388250  | 371.697763      | 725.361701     | 363.184489       | 724.377685     | 362.692481       | S    | <b>663.324270</b>  | 332.165773      | 646.297721     | 323.652499       | 645.313705         | 323.160491       | 5  |
| 8  | 856.431177  | 428.719227      | 839.404628     | 420.205952       | 838.420612     | 419.713944       | N    | <b>576.292242</b>  | 288.649759      | 559.265693     | 280.136485       |                    |                  | 4  |
| 9  | 969.515241  | 485.261259      | 952.488692     | 476.747984       | 951.504676     | 476.255976       | L    | 462.249315         | 231.628296      | 445.222766     | 223.115021       |                    |                  | 3  |
| 10 | 1143.561540 | 572.284408      | 1126.534991    | 563.771134       | 1125.550975    | 563.279126       | C    | 349.165251         | 175.086264      | 332.138702     | 166.572989       |                    |                  | 2  |
| 11 |             |                 |                |                  |                |                  | R    | 175.118952         | 88.063114       | 158.092403     | 79.549839        |                    |                  | 1  |

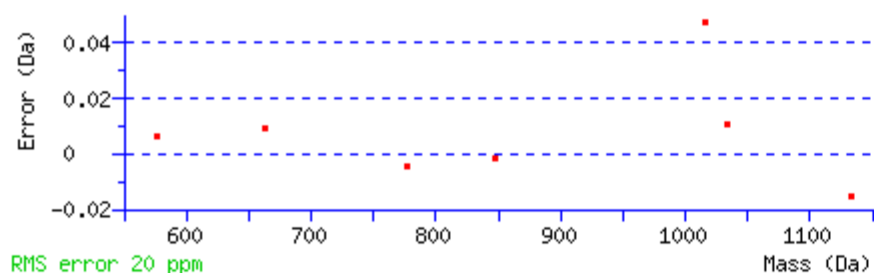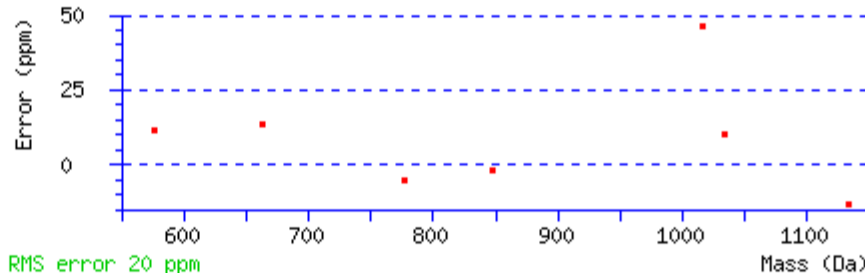

NCBI BLAST search of **NAVWALSNLCR**

(Parameters: blastp, nr protein database, expect=20000, no filter, PAM30)

Other BLAST [web gateways](#)

All matches to this query

| Score | Mr(calc):   | Delta    | Sequence                     |
|-------|-------------|----------|------------------------------|
| 42.3  | 1316.665909 | 0.003419 | <a href="#">NAVWALSNLCR</a>  |
| 7.7   | 1316.657181 | 0.012147 | <a href="#">ANENSLPSTQLK</a> |

Mascot: <http://www.matrixscience.com/>

# MATRIX SCIENCE Mascot Search Results

## Peptide View

MS/MS Fragmentation of **DAQVVQVVDGLSNILK**  
 Found in **IMA4\_HUMAN**, Importin subunit alpha-4 OS=Homo sapiens GN=KPNA4 PE=1 SV=1

Match to Query 54429: 1810.031748 from(906.023150,2+) rtinseconds(5183) index(82783)  
 Title: Locus:1.1.1.3457.27  
 Data file 2011-11-10 - TFD - EP 4-3.mgf

Click mouse within plot area to zoom in by factor of two about that point

Or, Plot from  to  Da

Label all possible matches  Label matches used for scoring

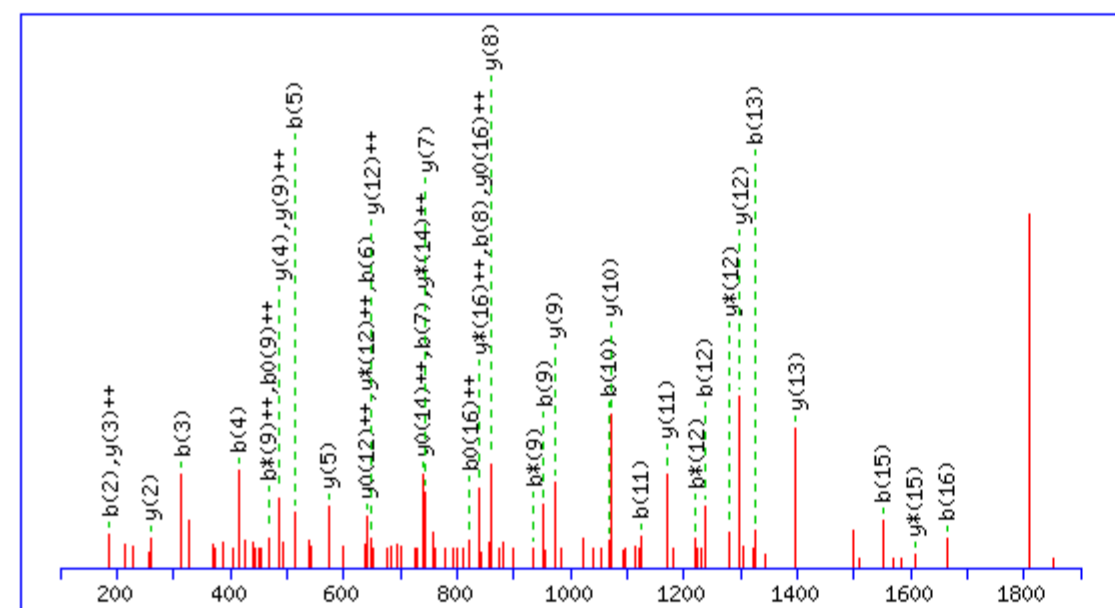

Monoisotopic mass of neutral peptide  $M_r(\text{calc})$ : 1810.020020  
 Fixed modifications: Propionamide (C) (apply to specified residues or termini only)  
 Ions Score: 121 Expect: 1.6e-012  
 Matches: 40/180 fragment ions using 43 most intense peaks [\(help\)](#)

| #  | b                  | b <sup>++</sup> | b*                 | b <sup>++</sup> * | b <sup>0</sup> | b <sup>0++</sup>  | Seq. | y                  | y <sup>++</sup>   | y*                 | y <sup>++</sup> * | y <sup>0</sup> | y <sup>0++</sup>  | #  |
|----|--------------------|-----------------|--------------------|-------------------|----------------|-------------------|------|--------------------|-------------------|--------------------|-------------------|----------------|-------------------|----|
| 1  | 116.034219         | 58.520748       |                    |                   | 98.023654      | 49.515465         | D    |                    |                   |                    |                   |                |                   | 17 |
| 2  | <b>187.071333</b>  | 94.039304       |                    |                   | 169.060768     | 85.034022         | A    | 1696.000348        | 848.503812        | 1678.973799        | <b>839.990537</b> | 1677.989783    | <b>839.498529</b> | 16 |
| 3  | <b>315.129911</b>  | 158.068593      | 298.103362         | 149.555319        | 297.119346     | 149.063311        | Q    | 1624.963234        | 812.985255        | <b>1607.936685</b> | 804.471980        | 1606.952669    | 803.979972        | 15 |
| 4  | <b>414.198325</b>  | 207.602801      | 397.171776         | 199.089526        | 396.187760     | 198.597518        | V    | 1496.904656        | 748.955966        | 1479.878107        | <b>740.442691</b> | 1478.894091    | <b>739.950683</b> | 14 |
| 5  | <b>513.266739</b>  | 257.137008      | 496.240190         | 248.623733        | 495.256174     | 248.131725        | V    | <b>1397.836242</b> | 699.421759        | 1380.809693        | 690.908484        | 1379.825677    | 690.416476        | 13 |
| 6  | <b>641.325317</b>  | 321.166297      | 624.298768         | 312.653022        | 623.314752     | 312.161014        | Q    | <b>1298.767828</b> | <b>649.887552</b> | <b>1281.741279</b> | <b>641.374277</b> | 1280.757263    | <b>640.882269</b> | 12 |
| 7  | <b>740.393731</b>  | 370.700504      | 723.367182         | 362.187229        | 722.383166     | 361.695221        | V    | <b>1170.709250</b> | 585.858263        | 1153.682701        | 577.344988        | 1152.698685    | 576.852980        | 11 |
| 8  | <b>839.462145</b>  | 420.234711      | 822.435596         | 411.721436        | 821.451580     | 411.229428        | V    | <b>1071.640836</b> | 536.324056        | 1054.614287        | 527.810781        | 1053.630271    | 527.318773        | 10 |
| 9  | <b>952.546209</b>  | 476.776743      | <b>935.519660</b>  | <b>468.263468</b> | 934.535644     | <b>467.771460</b> | L    | <b>972.572422</b>  | <b>486.789849</b> | 955.545873         | 478.276574        | 954.561857     | 477.784566        | 9  |
| 10 | <b>1067.573152</b> | 534.290214      | 1050.546603        | 525.776940        | 1049.562587    | 525.284931        | D    | <b>859.488358</b>  | 430.247817        | 842.461809         | 421.734542        | 841.477793     | 421.242534        | 8  |
| 11 | <b>1124.594616</b> | 562.800946      | 1107.568067        | 554.287671        | 1106.584051    | 553.795663        | G    | <b>744.461415</b>  | 372.734345        | 727.434866         | 364.221071        | 726.450850     | 363.729063        | 7  |
| 12 | <b>1237.678680</b> | 619.342978      | <b>1220.652131</b> | 610.829703        | 1219.668115    | 610.337695        | L    | 687.439951         | 344.223613        | 670.413402         | 335.710339        | 669.429386     | 335.218331        | 6  |
| 13 | <b>1324.710708</b> | 662.858992      | 1307.684159        | 654.345717        | 1306.700143    | 653.853709        | S    | <b>574.355887</b>  | 287.681581        | 557.329338         | 279.168307        | 556.345322     | 278.676299        | 5  |
| 14 | 1438.753635        | 719.880455      | 1421.727086        | 711.367181        | 1420.743070    | 710.875173        | N    | <b>487.323859</b>  | 244.165567        | 470.297310         | 235.652293        |                |                   | 4  |
| 15 | <b>1551.837699</b> | 776.422487      | 1534.811150        | 767.909213        | 1533.827134    | 767.417205        | I    | 373.280932         | <b>187.144104</b> | 356.254383         | 178.630829        |                |                   | 3  |
| 16 | <b>1664.921763</b> | 832.964519      | 1647.895214        | 824.451245        | 1646.911198    | <b>823.959237</b> | L    | <b>260.196868</b>  | 130.602072        | 243.170319         | 122.088797        |                |                   | 2  |
| 17 |                    |                 |                    |                   |                |                   | K    | 147.112804         | 74.060040         | 130.086255         | 65.546765         |                |                   | 1  |

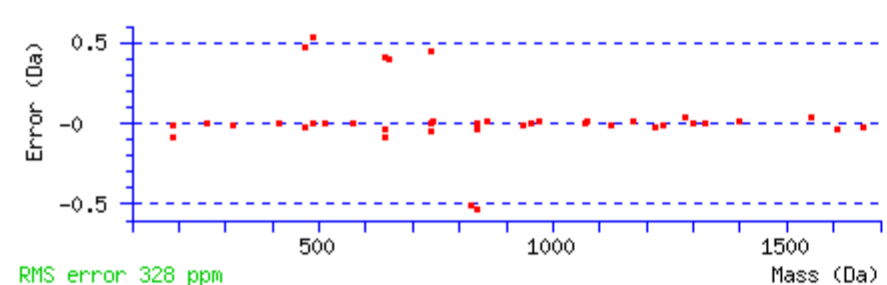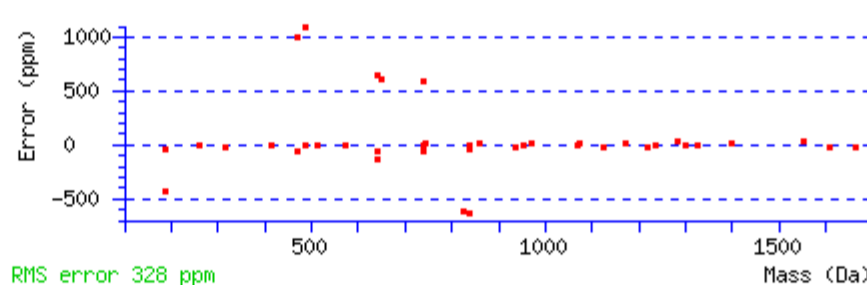

NCBI BLAST search of **DAQVVQVVDGLSNILK**  
 (Parameters: blastp, nr protein database, expect=20000, no filter, PAM30)  
 Other BLAST [web gateways](#)

## All matches to this query

| Score | $M_r(\text{calc})$ : | Delta     | Sequence                         |
|-------|----------------------|-----------|----------------------------------|
| 121.3 | 1810.020020          | 0.011728  | <a href="#">DAQVVQVVDGLSNILK</a> |
| 1.9   | 1810.038620          | -0.006872 | <a href="#">NVLMTLPILSAQLR</a>   |
| 1.8   | 1810.024704          | 0.007044  | <a href="#">CISLIPVNGRPRTGLK</a> |

Mascot: <http://www.matrixscience.com/>

# **MATRIX** SCIENCE Mascot Search Results

## Peptide View

MS/MS Fragmentation of **EVMPLLLAYLK**

Found in **IPO4\_HUMAN**, Importin-4 OS=Homo sapiens GN=IPO4 PE=1 SV=2

Match to Query 35071: 1288.744688 from(645.379620,2+) rtinseconds(4266) index(65010)

Title: Locus:1.1.1.2920.23

Data file 2011-11-12 - TFD - EP 6-1.mgf

Click mouse within plot area to zoom in by factor of two about that point

Or, Plot from  to  Da

Label all possible matches  Label matches used for scoring

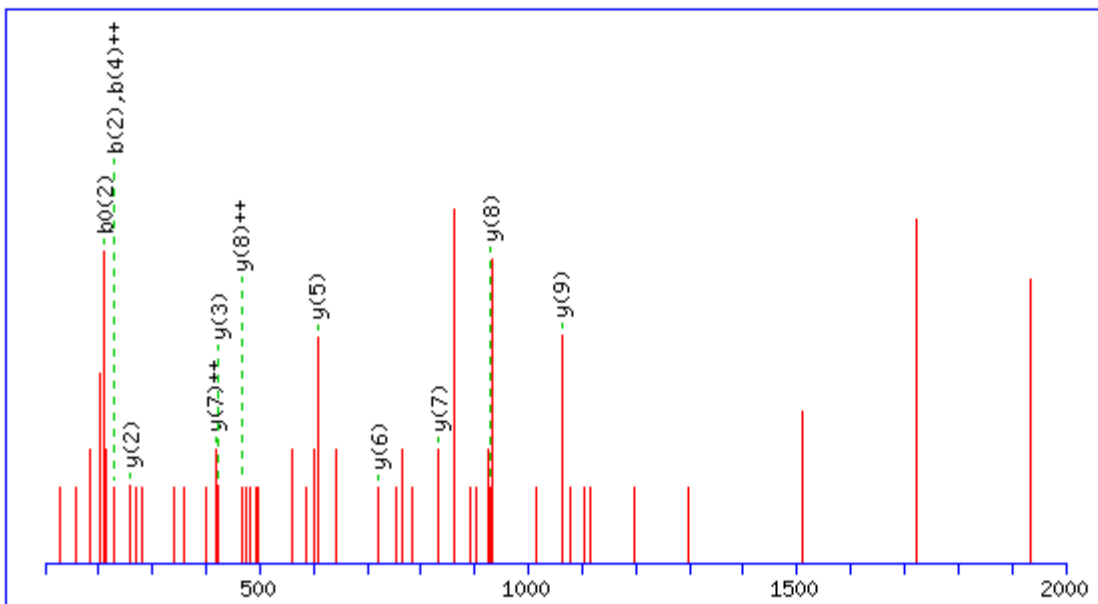

Monoisotopic mass of neutral peptide Mr(calc): 1288.746445

Fixed modifications: Propionamide (C) (apply to specified residues or termini only)

Ions Score: 36 Expect: 0.0011

Matches : 12/80 fragment ions using 21 most intense peaks ([help](#))

| #  | b                 | b <sup>++</sup>   | b <sup>0</sup>    | b <sup>0++</sup> | Seq. | y                  | y <sup>++</sup>   | y <sup>*</sup> | y <sup>*++</sup> | #  |
|----|-------------------|-------------------|-------------------|------------------|------|--------------------|-------------------|----------------|------------------|----|
| 1  | 130.049869        | 65.528572         | 112.039304        | 56.523290        | E    |                    |                   |                |                  | 11 |
| 2  | <b>229.118283</b> | 115.062780        | <b>211.107718</b> | 106.057497       | V    | 1160.711166        | 580.859221        | 1143.684617    | 572.345946       | 10 |
| 3  | 360.158768        | 180.583022        | 342.148203        | 171.577740       | M    | <b>1061.642752</b> | 531.325014        | 1044.616203    | 522.811740       | 9  |
| 4  | 457.211532        | <b>229.109404</b> | 439.200967        | 220.104121       | P    | <b>930.602267</b>  | <b>465.804772</b> | 913.575718     | 457.291497       | 8  |
| 5  | 570.295596        | 285.651436        | 552.285031        | 276.646154       | L    | <b>833.549503</b>  | <b>417.278390</b> | 816.522954     | 408.765115       | 7  |
| 6  | 683.379660        | 342.193468        | 665.369095        | 333.188186       | L    | <b>720.465439</b>  | 360.736358        | 703.438890     | 352.223083       | 6  |
| 7  | 796.463724        | 398.735500        | 778.453159        | 389.730218       | L    | <b>607.381375</b>  | 304.194325        | 590.354826     | 295.681051       | 5  |
| 8  | 867.500838        | 434.254057        | 849.490273        | 425.248775       | A    | 494.297311         | 247.652293        | 477.270762     | 239.139019       | 4  |
| 9  | 1030.564167       | 515.785722        | 1012.553602       | 506.780439       | Y    | <b>423.260197</b>  | 212.133736        | 406.233648     | 203.620462       | 3  |
| 10 | 1143.648231       | 572.327753        | 1125.637666       | 563.322471       | L    | <b>260.196868</b>  | 130.602072        | 243.170319     | 122.088797       | 2  |
| 11 |                   |                   |                   |                  | K    | 147.112804         | 74.060040         | 130.086255     | 65.546765        | 1  |

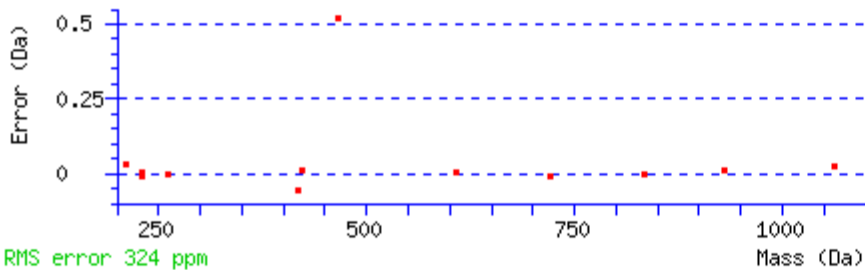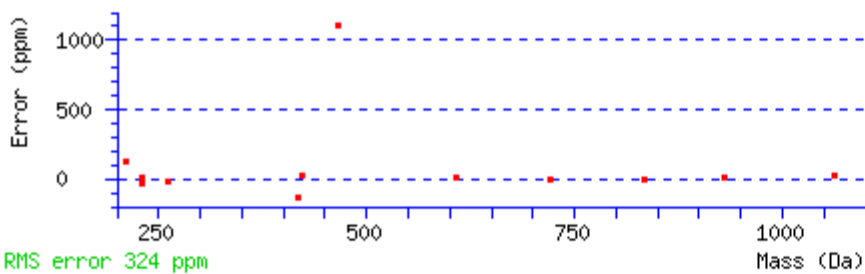

NCBI BLAST search of **EVMPLLLAYLK**

(Parameters: blastp, nr protein database, expect=20000, no filter, PAM30)

Other BLAST [web gateways](#)

All matches to this query

| Score | Mr(calc):   | Delta     | Sequence                    |
|-------|-------------|-----------|-----------------------------|
| 35.9  | 1288.746445 | -0.001757 | <a href="#">EVMPLLLAYLK</a> |
| 3.0   | 1288.736374 | 0.008314  | <a href="#">QHLLDARPAIR</a> |



**MATRIX SCIENCE Mascot Search Results**

**Peptide View**

MS/MS Fragmentation of **LIAAGGYNR**

Found in **NS1BP\_HUMAN**, Influenza virus NS1A-binding protein OS=Homo sapiens GN=IVNS1ABP PE=1 SV=3

Match to Query 172456: 933.501908 from(467.758230,2+) rtinseconds(1355) index(500041)

Title: Locus:1.1.1.843.13

Data file C:\Program Files (x86)\Matrix Science\Mascot Daemon\mgf3 TFD - Epitel - R2\mascot\_daemon\_merge.mgf

Click mouse within plot area to zoom in by factor of two about that point

Or, Plot from  to  Da

Label all possible matches  Label matches used for scoring

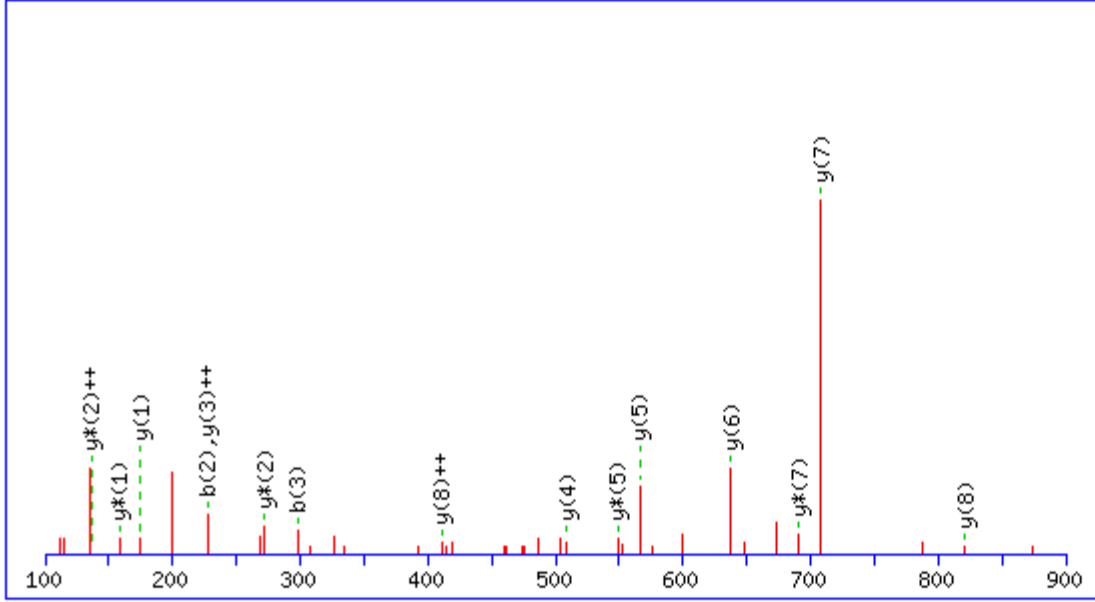

Monoisotopic mass of neutral peptide Mr(calc): 933.503189

Fixed modifications: Carbamidomethyl (C) (apply to specified residues or termini only)

Ions Score: 33 Expect: 0.0057

Matches : 15/50 fragment ions using 32 most intense peaks [\(help\)](#)

| # | b                 | b <sup>++</sup> | b <sup>*</sup> | b <sup>*++</sup> | Seq. | y                 | y <sup>++</sup>   | y <sup>*</sup>    | y <sup>*++</sup>  | # |
|---|-------------------|-----------------|----------------|------------------|------|-------------------|-------------------|-------------------|-------------------|---|
| 1 | 114.091340        | 57.549308       |                |                  | L    |                   |                   |                   |                   | 9 |
| 2 | <b>227.175404</b> | 114.091340      |                |                  | I    | <b>821.426428</b> | <b>411.216852</b> | 804.399879        | 402.703577        | 8 |
| 3 | <b>298.212518</b> | 149.609897      |                |                  | A    | <b>708.342364</b> | 354.674820        | <b>691.315815</b> | 346.161545        | 7 |
| 4 | 369.249632        | 185.128454      |                |                  | A    | <b>637.305250</b> | 319.156263        | 620.278701        | 310.642988        | 6 |
| 5 | 426.271096        | 213.639186      |                |                  | G    | <b>566.268136</b> | 283.637706        | <b>549.241587</b> | 275.124431        | 5 |
| 6 | 483.292560        | 242.149918      |                |                  | G    | <b>509.246672</b> | 255.126974        | 492.220123        | 246.613699        | 4 |
| 7 | 646.355889        | 323.681582      |                |                  | Y    | 452.225208        | <b>226.616242</b> | 435.198659        | 218.102967        | 3 |
| 8 | 760.398816        | 380.703046      | 743.372267     | 372.189771       | N    | 289.161879        | 145.084577        | <b>272.135330</b> | <b>136.571303</b> | 2 |
| 9 |                   |                 |                |                  | R    | <b>175.118952</b> | 88.063114         | <b>158.092403</b> | 79.549839         | 1 |

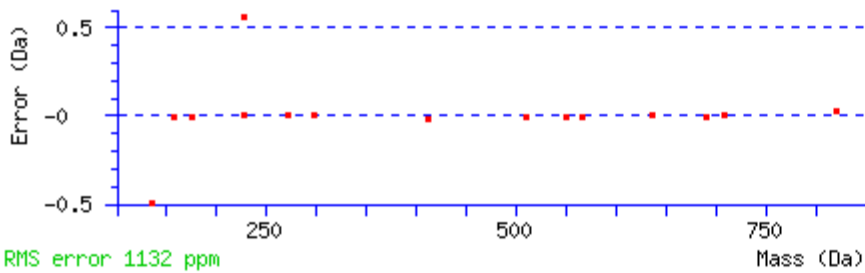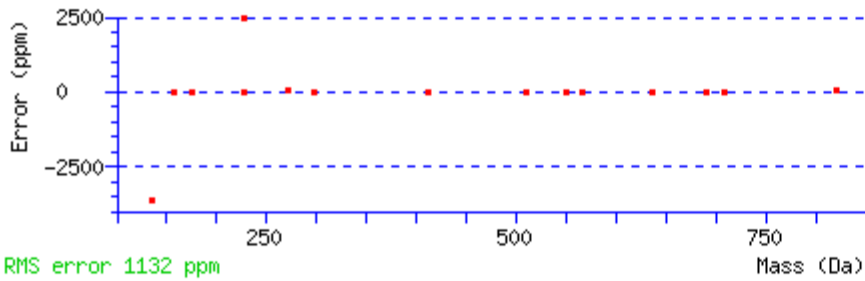

NCBI BLAST search of [LIAAGGYNR](#)

(Parameters: blastp, nr protein database, expect=20000, no filter, PAM30)

Other BLAST [web gateways](#)

**All matches to this query**

| Score | Mr(calc):  | Delta     | Sequence                  |
|-------|------------|-----------|---------------------------|
| 32.7  | 933.503189 | -0.001281 | <a href="#">LIAAGGYNR</a> |
| 10.1  | 933.499374 | 0.002534  | <a href="#">LLVASWVM</a>  |
| 7.2   | 933.493317 | 0.008591  | <a href="#">LAHGHFPR</a>  |
| 6.4   | 933.499374 | 0.002534  | <a href="#">LLLPQFGM</a>  |
| 4.4   | 933.495346 | 0.006562  | <a href="#">LLTDGIMR</a>  |
| 3.4   | 933.503220 | -0.001312 | <a href="#">GPPKPGPPR</a> |
| 3.4   | 933.503220 | -0.001312 | <a href="#">GPPKPGPPR</a> |
| 1.9   | 933.499374 | 0.002534  | <a href="#">IPPSFVKM</a>  |
| 1.9   | 933.507217 | -0.005309 | <a href="#">IIHYFNK</a>   |
| 1.9   | 933.502731 | -0.000823 | <a href="#">IIQMGLLM</a>  |

# MASCOT Search Results

## Peptide View

MS/MS Fragmentation of **IDLPEYQGEPDEISIQK**  
 Found in **ITPA\_HUMAN**, Inosine triphosphate pyrophosphatase OS=Homo sapiens GN=ITPA PE=1 SV=2

Match to Query 56349: 1972.967108 from(987.490830,2+) rtinseconds(2898) index(37851)  
 Title: Locus:1.1.1.2255.51  
 Data file 2011-11-12 - TFD - EP 6-6.mgf

Click mouse within plot area to zoom in by factor of two about that point  
 Or, Plot from  to  Da   
 Label all possible matches  Label matches used for scoring

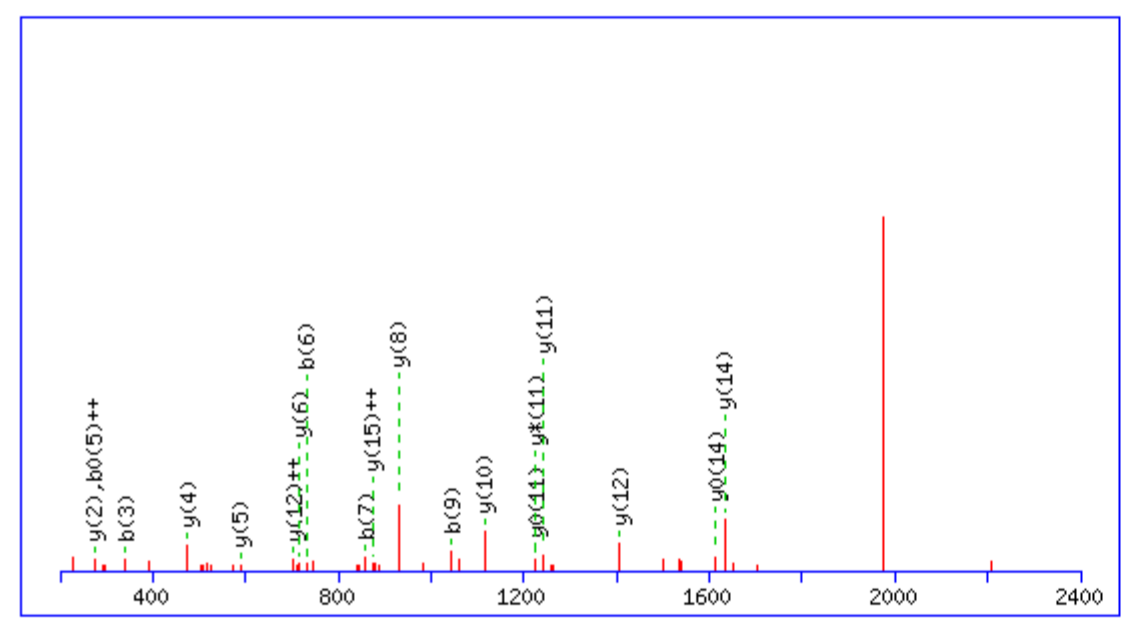

Monoisotopic mass of neutral peptide Mr(calc): 1972.962921  
 Fixed modifications: Propionamide (C) (apply to specified residues or termini only)  
 Ions Score: 60 Expect: 3.7e-006  
 Matches: 19/172 fragment ions using 28 most intense peaks [\(help\)](#)

| #  | b                  | b <sup>++</sup> | b <sup>*</sup> | b <sup>*++</sup> | b <sup>0</sup> | b <sup>0++</sup>  | Seq. | y                  | y <sup>++</sup>   | y <sup>*</sup>     | y <sup>*++</sup> | y <sup>0</sup>     | y <sup>0++</sup> | #  |
|----|--------------------|-----------------|----------------|------------------|----------------|-------------------|------|--------------------|-------------------|--------------------|------------------|--------------------|------------------|----|
| 1  | 114.091340         | 57.549308       |                |                  |                |                   | I    |                    |                   |                    |                  |                    |                  | 17 |
| 2  | 229.118283         | 115.062779      |                |                  | 211.107718     | 106.057497        | D    | 1860.886166        | 930.946721        | 1843.859617        | 922.433447       | 1842.875601        | 921.941439       | 16 |
| 3  | <b>342.202347</b>  | 171.604811      |                |                  | 324.191782     | 162.599529        | L    | 1745.859223        | <b>873.433250</b> | 1728.832674        | 864.919975       | 1727.848658        | 864.427967       | 15 |
| 4  | 439.255111         | 220.131193      |                |                  | 421.244546     | 211.125911        | P    | <b>1632.775159</b> | 816.891218        | 1615.748610        | 808.377943       | <b>1614.764594</b> | 807.885935       | 14 |
| 5  | 568.297704         | 284.652490      |                |                  | 550.287139     | <b>275.647208</b> | E    | 1535.722395        | 768.364836        | 1518.695846        | 759.851561       | 1517.711830        | 759.359553       | 13 |
| 6  | <b>731.361033</b>  | 366.184155      |                |                  | 713.350468     | 357.178872        | Y    | <b>1406.679802</b> | <b>703.843539</b> | 1389.653253        | 695.330265       | 1388.669237        | 694.838257       | 12 |
| 7  | <b>859.419611</b>  | 430.213444      | 842.393062     | 421.700169       | 841.409046     | 421.208161        | Q    | <b>1243.616473</b> | 622.311875        | <b>1226.589924</b> | 613.798600       | <b>1225.605908</b> | 613.306592       | 11 |
| 8  | 916.441075         | 458.724176      | 899.414526     | 450.210901       | 898.430510     | 449.718893        | G    | <b>1115.557895</b> | 558.282586        | 1098.531346        | 549.769311       | 1097.547330        | 549.277303       | 10 |
| 9  | <b>1045.483668</b> | 523.245472      | 1028.457119    | 514.732198       | 1027.473103    | 514.240190        | E    | 1058.536431        | 529.771854        | 1041.509882        | 521.258579       | 1040.525866        | 520.766571       | 9  |
| 10 | 1142.536432        | 571.771854      | 1125.509883    | 563.258580       | 1124.525867    | 562.766572        | P    | <b>929.493838</b>  | 465.250557        | 912.467289         | 456.737283       | 911.483273         | 456.245275       | 8  |
| 11 | 1257.563375        | 629.285326      | 1240.536826    | 620.772051       | 1239.552810    | 620.280043        | D    | 832.441074         | 416.724175        | 815.414525         | 408.210901       | 814.430509         | 407.718893       | 7  |
| 12 | 1386.605968        | 693.806622      | 1369.579419    | 685.293348       | 1368.595403    | 684.801340        | E    | <b>717.414131</b>  | 359.210704        | 700.387582         | 350.697429       | 699.403566         | 350.205421       | 6  |
| 13 | 1499.690032        | 750.348654      | 1482.663483    | 741.835380       | 1481.679467    | 741.343371        | I    | <b>588.371538</b>  | 294.689407        | 571.344989         | 286.176133       | 570.360973         | 285.684125       | 5  |
| 14 | 1586.722060        | 793.864668      | 1569.695511    | 785.351394       | 1568.711495    | 784.859386        | S    | <b>475.287474</b>  | 238.147375        | 458.260925         | 229.634101       | 457.276909         | 229.142093       | 4  |
| 15 | 1699.806124        | 850.406700      | 1682.779575    | 841.893426       | 1681.795559    | 841.401417        | I    | 388.255446         | 194.631361        | 371.228897         | 186.118087       |                    |                  | 3  |
| 16 | 1827.864702        | 914.435989      | 1810.838153    | 905.922715       | 1809.854137    | 905.430707        | Q    | <b>275.171382</b>  | 138.089329        | 258.144833         | 129.576055       |                    |                  | 2  |
| 17 |                    |                 |                |                  |                |                   | K    | 147.112804         | 74.060040         | 130.086255         | 65.546765        |                    |                  | 1  |

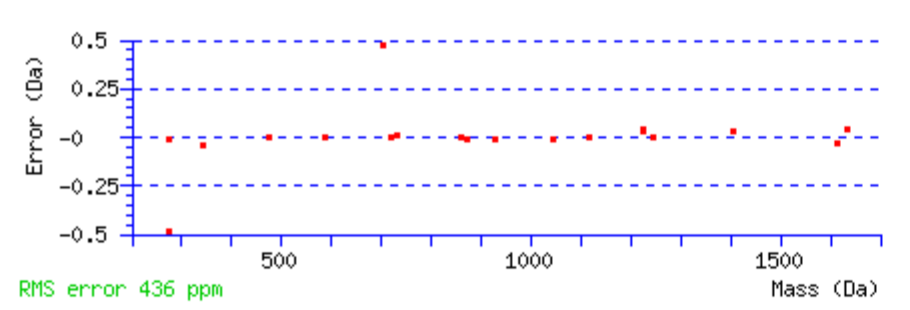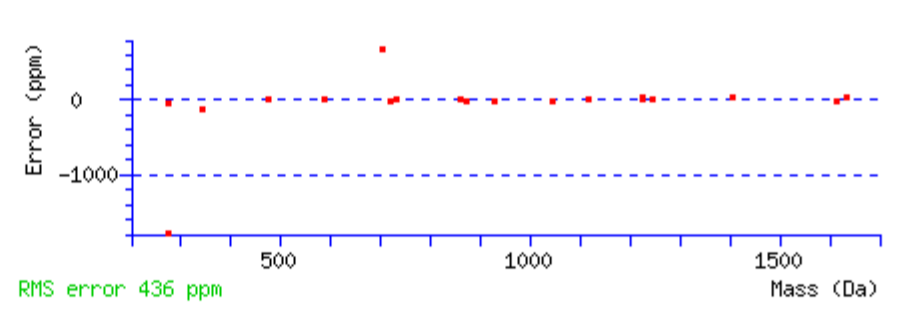

NCBI BLAST search of **IDLPEYQGEPDEISIQK**  
 (Parameters: blastp, nr protein database, expect=20000, no filter, PAM30)  
 Other BLAST [web gateways](#)

### All matches to this query

| Score | Mr(calc):   | Delta     | Sequence                           |
|-------|-------------|-----------|------------------------------------|
| 60.0  | 1972.962921 | 0.004187  | <a href="#">IDLPEYQGEPDEISIQK</a>  |
| 2.1   | 1972.981583 | -0.014475 | <a href="#">DLMPPPDLATSPTKSPFK</a> |
| 2.1   | 1972.981583 | -0.014475 | <a href="#">DLMPPPDLATSPTKSPFK</a> |

# MASCOT Search Results

## Peptide View

MS/MS Fragmentation of **APAVAEENPK**

Found in **IBP6\_HUMAN**, Insulin-like growth factor-binding protein 6 OS=Homo sapiens GN=IGFBP6 PE=1 SV=1

Match to Query 293741: 1024.516468 from(513.265510,2+) rtinseconds(928) index(242456)

Title: Locus:1.1.1.793.21

Data file C:\Program Files (x86)\Matrix Science\Mascot Daemon\mgf3 TFD - Epitel - R2\mascot\_daemon\_merge.mgf

Click mouse within plot area to zoom in by factor of two about that point

Or, Plot from  to  Da

Label all possible matches  Label matches used for scoring

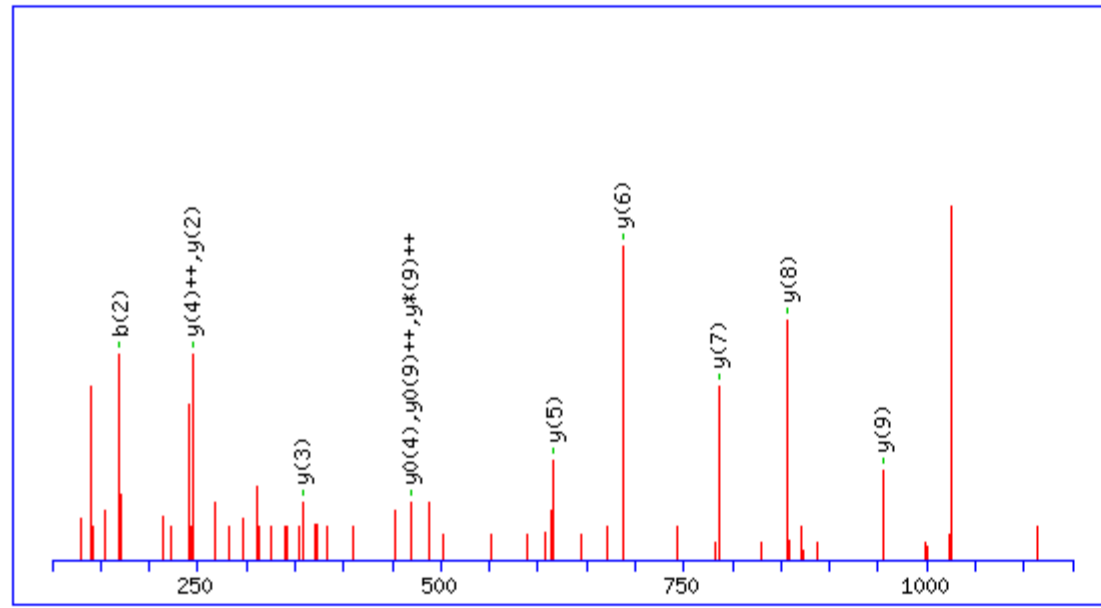

Monoisotopic mass of neutral peptide Mr(calc): 1024.518890

Fixed modifications: Carbamidomethyl (C) (apply to specified residues or termini only)

Ions Score: 71 Expect: 8.3e-007

Matches : 12/78 fragment ions using 9 most intense peaks [\(help\)](#)

| #  | b          | b <sup>++</sup> | b <sup>*</sup> | b <sup>*++</sup> | b <sup>0</sup> | b <sup>0++</sup> | Seq. | y          | y <sup>++</sup> | y <sup>*</sup> | y <sup>*++</sup> | y <sup>0</sup> | y <sup>0++</sup> | #  |
|----|------------|-----------------|----------------|------------------|----------------|------------------|------|------------|-----------------|----------------|------------------|----------------|------------------|----|
| 1  | 72.044390  | 36.525833       |                |                  |                |                  | A    |            |                 |                |                  |                |                  | 10 |
| 2  | 169.097154 | 85.052215       |                |                  |                |                  | P    | 954.489087 | 477.748182      | 937.462538     | 469.234907       | 936.478522     | 468.742899       | 9  |
| 3  | 240.134268 | 120.570772      |                |                  |                |                  | A    | 857.436323 | 429.221800      | 840.409774     | 420.708525       | 839.425758     | 420.216517       | 8  |
| 4  | 339.202682 | 170.104979      |                |                  |                |                  | V    | 786.399209 | 393.703243      | 769.372660     | 385.189968       | 768.388644     | 384.697960       | 7  |
| 5  | 410.239796 | 205.623536      |                |                  |                |                  | A    | 687.330795 | 344.169036      | 670.304246     | 335.655761       | 669.320230     | 335.163753       | 6  |
| 6  | 539.282389 | 270.144833      |                |                  | 521.271824     | 261.139550       | E    | 616.293681 | 308.650479      | 599.267132     | 300.137204       | 598.283116     | 299.645196       | 5  |
| 7  | 668.324982 | 334.666129      |                |                  | 650.314417     | 325.660847       | E    | 487.251088 | 244.129182      | 470.224539     | 235.615907       | 469.240523     | 235.123899       | 4  |
| 8  | 782.367909 | 391.687593      | 765.341360     | 383.174318       | 764.357344     | 382.682310       | N    | 358.208495 | 179.607885      | 341.181946     | 171.094611       |                |                  | 3  |
| 9  | 879.420673 | 440.213975      | 862.394124     | 431.700700       | 861.410108     | 431.208692       | P    | 244.165568 | 122.586422      | 227.139019     | 114.073148       |                |                  | 2  |
| 10 |            |                 |                |                  |                |                  | K    | 147.112804 | 74.060040       | 130.086255     | 65.546765        |                |                  | 1  |

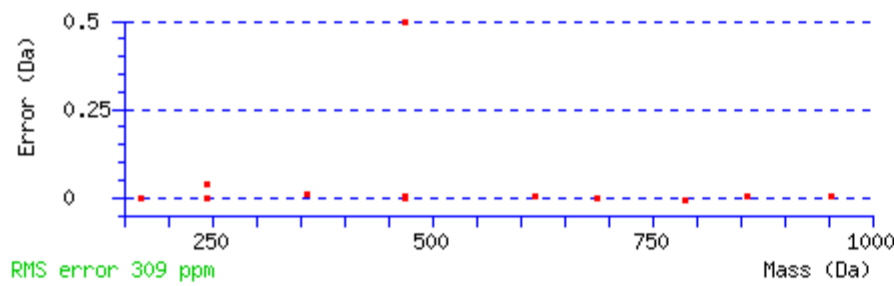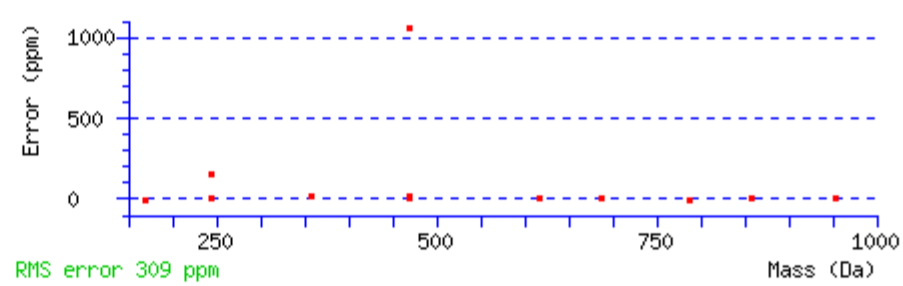

NCBI BLAST search of [APAVAEENPK](#)

(Parameters: blastp, nr protein database, expect=20000, no filter, PAM30)

Other BLAST [web gateways](#)

## All matches to this query

| Score | Mr(calc):   | Delta     | Sequence                   |
|-------|-------------|-----------|----------------------------|
| 70.8  | 1024.518890 | -0.002422 | <a href="#">APAVAEENPK</a> |
| 10.6  | 1024.516418 | 0.000050  | <a href="#">APAFAFVRM</a>  |
| 0.1   | 1024.512375 | 0.004093  | <a href="#">APPASRAPQM</a> |

Mascot: <http://www.matrixscience.com/>

# MASCOT SCIENCE Mascot Search Results

## Peptide View

MS/MS Fragmentation of **LVFSALGPTSLR**

Found in **ITB4\_HUMAN**, Integrin beta-4 OS=Homo sapiens GN=ITGB4 PE=1 SV=5

Match to Query 36132: 1259.717888 from(630.866220,2+) rtinseconds(3076) index(43612)

Title: Locus:1.1.1.1559.25

Data file 2012-01-27 - TFD - Epitel - IEC - 10ul - 1.mgf

Click mouse within plot area to zoom in by factor of two about that point

Or, Plot from  to  Da

Label all possible matches  Label matches used for scoring

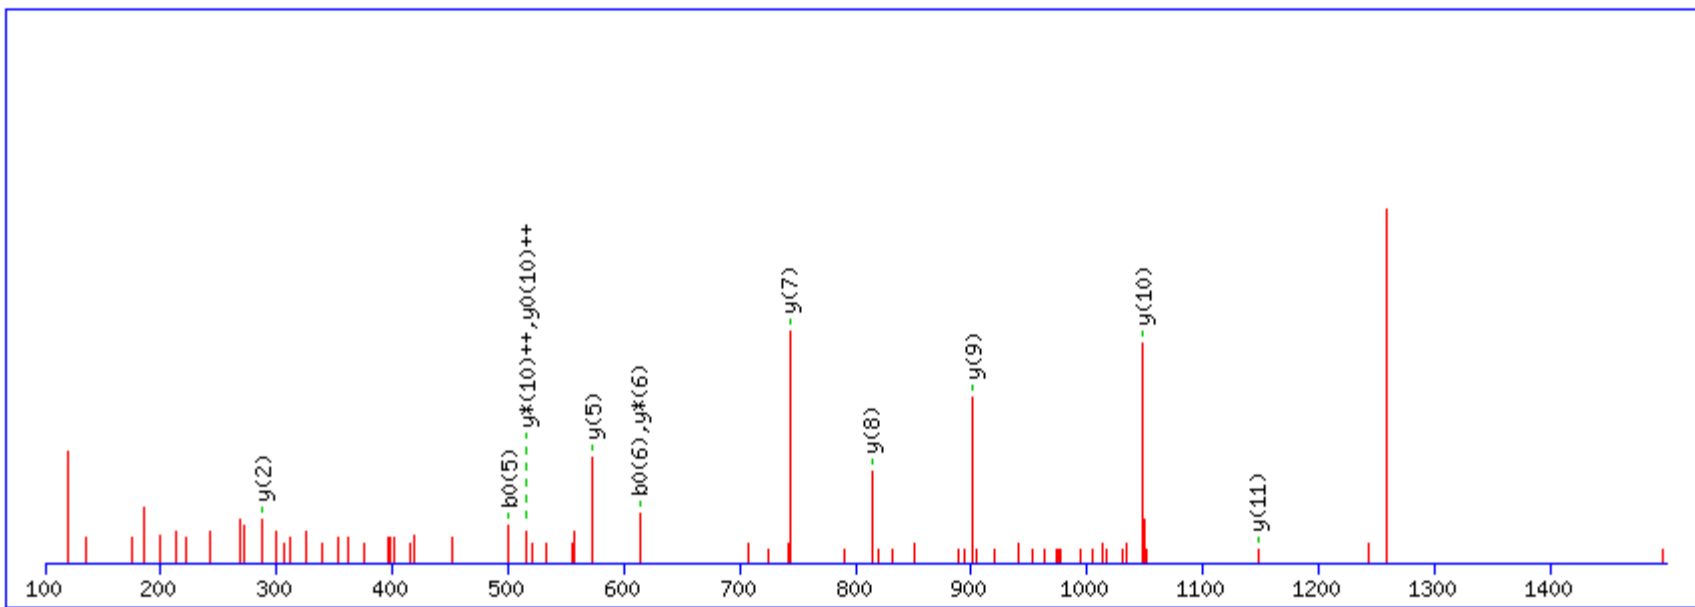

Monoisotopic mass of neutral peptide Mr(calc): 1259.723770

Fixed modifications: Carbamidomethyl (C) (apply to specified residues or termini only)

Ions Score: 39 Expect: 0.00026

Matches : 12/100 fragment ions using 22 most intense peaks [\(help\)](#)

| #  | b           | b <sup>++</sup> | b <sup>0</sup>    | b <sup>0++</sup> | Seq. | y                  | y <sup>++</sup> | y <sup>*</sup>    | y <sup>*++</sup>  | y <sup>0</sup> | y <sup>0++</sup>  | #  |
|----|-------------|-----------------|-------------------|------------------|------|--------------------|-----------------|-------------------|-------------------|----------------|-------------------|----|
| 1  | 114.091340  | 57.549308       |                   |                  | L    |                    |                 |                   |                   |                |                   | 12 |
| 2  | 213.159754  | 107.083515      |                   |                  | V    | <b>1147.646985</b> | 574.327131      | 1130.620436       | 565.813856        | 1129.636420    | 565.321848        | 11 |
| 3  | 360.228168  | 180.617722      |                   |                  | F    | <b>1048.578571</b> | 524.792924      | 1031.552022       | <b>516.279649</b> | 1030.568006    | <b>515.787641</b> | 10 |
| 4  | 447.260196  | 224.133736      | 429.249631        | 215.128454       | S    | <b>901.510157</b>  | 451.258716      | 884.483608        | 442.745442        | 883.499592     | 442.253434        | 9  |
| 5  | 518.297310  | 259.652293      | <b>500.286745</b> | 250.647011       | A    | <b>814.478129</b>  | 407.742703      | 797.451580        | 399.229428        | 796.467564     | 398.737420        | 8  |
| 6  | 631.381374  | 316.194325      | <b>613.370809</b> | 307.189043       | L    | <b>743.441015</b>  | 372.224146      | 726.414466        | 363.710871        | 725.430450     | 363.218863        | 7  |
| 7  | 688.402838  | 344.705057      | 670.392273        | 335.699775       | G    | 630.356951         | 315.682114      | <b>613.330402</b> | 307.168839        | 612.346386     | 306.676831        | 6  |
| 8  | 785.455602  | 393.231439      | 767.445037        | 384.226157       | P    | <b>573.335487</b>  | 287.171382      | 556.308938        | 278.658107        | 555.324922     | 278.166099        | 5  |
| 9  | 886.503281  | 443.755279      | 868.492716        | 434.749996       | T    | 476.282723         | 238.644999      | 459.256174        | 230.131725        | 458.272158     | 229.639717        | 4  |
| 10 | 973.535309  | 487.271293      | 955.524744        | 478.266010       | S    | 375.235044         | 188.121160      | 358.208495        | 179.607885        | 357.224479     | 179.115877        | 3  |
| 11 | 1086.619373 | 543.813325      | 1068.608808       | 534.808042       | L    | <b>288.203016</b>  | 144.605146      | 271.176467        | 136.091871        |                |                   | 2  |
| 12 |             |                 |                   |                  | R    | 175.118952         | 88.063114       | 158.092403        | 79.549839         |                |                   | 1  |

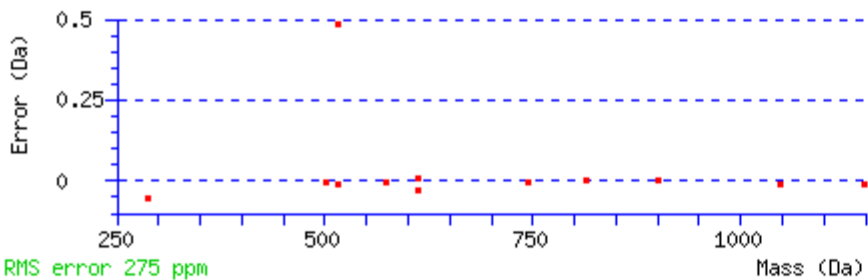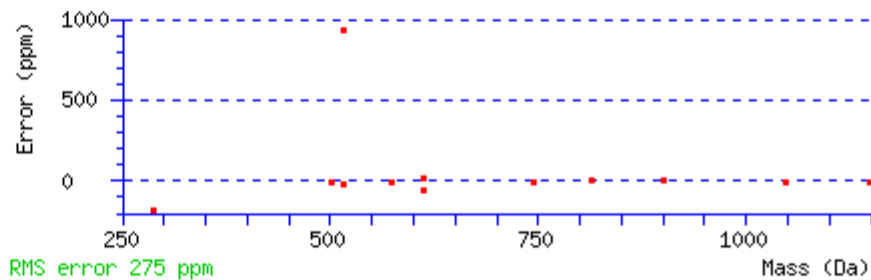

NCBI BLAST search of **LVFSALGPTSLR**

(Parameters: blastp, nr protein database, expect=20000, no filter, PAM30)

Other BLAST [web gateways](#)

All matches to this query

| Score | Mr(calc):   | Delta     | Sequence                     |
|-------|-------------|-----------|------------------------------|
| 38.7  | 1259.723770 | -0.005882 | <a href="#">LVFSALGPTSLR</a> |
| 0.5   | 1259.712524 | 0.005364  | <a href="#">LVLYPEGIQTK</a>  |

# MASCOT Search Results

## Peptide View

MS/MS Fragmentation of **MVGDVTGAQAYASTAK**

Found in **IFM1\_HUMAN**, Interferon-induced transmembrane protein 1 OS=Homo sapiens GN=IFITM1 PE=1 SV=3

Match to Query 40501: 1584.750248 from(793.382400,2+) rtinseconds(1802) index(11514)

Title: Locus:1.1.1.2142.42

Data file 2011-11-10 - TFD - EP 4-7.mgf

Click mouse within plot area to zoom in by factor of two about that point

Or, Plot from  to  Da

Label all possible matches  Label matches used for scoring

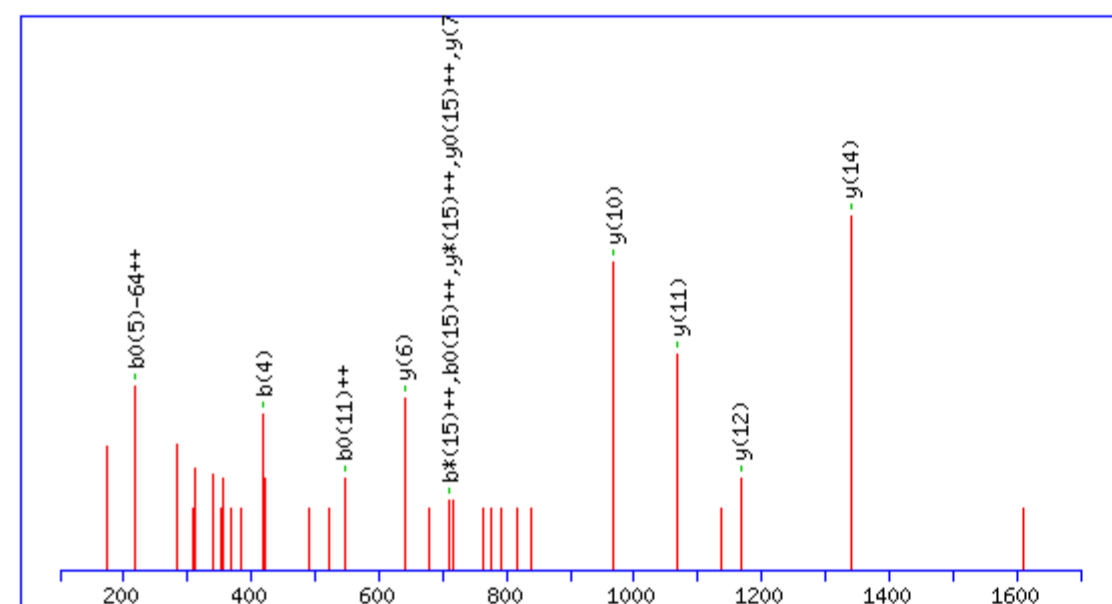

Monoisotopic mass of neutral peptide  $M_r(\text{calc})$ : 1584.745377

Fixed modifications: Propionamide (C) (apply to specified residues or termini only)

Variable modifications:

M1 : Oxidation (M), with neutral losses 0.000000 (shown in table), 63.998285

Ions Score: 36 Expect: 0.0025

Matches : 13/222 fragment ions using 11 most intense peaks ([help](#))

| #  | b           | b <sup>++</sup> | b <sup>*</sup> | b <sup>+++</sup> | b <sup>0</sup> | b <sup>0++</sup> | Seq. | y           | y <sup>++</sup> | y <sup>*</sup> | y <sup>+++</sup> | y <sup>0</sup> | y <sup>0++</sup> | #  |
|----|-------------|-----------------|----------------|------------------|----------------|------------------|------|-------------|-----------------|----------------|------------------|----------------|------------------|----|
| 1  | 148.042676  | 74.524976       |                |                  |                |                  | M    |             |                 |                |                  |                |                  | 16 |
| 2  | 247.111090  | 124.059183      |                |                  |                |                  | V    | 1438.717252 | 719.862264      | 1421.690703    | 711.348990       | 1420.706687    | 710.856982       | 15 |
| 3  | 304.132554  | 152.569915      |                |                  |                |                  | G    | 1339.648838 | 670.328057      | 1322.622289    | 661.814783       | 1321.638273    | 661.322775       | 14 |
| 4  | 419.159497  | 210.083386      |                |                  | 401.148932     | 201.078104       | D    | 1282.627374 | 641.817325      | 1265.600825    | 633.304051       | 1264.616809    | 632.812043       | 13 |
| 5  | 518.227911  | 259.617594      |                |                  | 500.217346     | 250.612311       | V    | 1167.600431 | 584.303854      | 1150.573882    | 575.790579       | 1149.589866    | 575.298571       | 12 |
| 6  | 619.275590  | 310.141433      |                |                  | 601.265025     | 301.136151       | T    | 1068.532017 | 534.769647      | 1051.505468    | 526.256372       | 1050.521452    | 525.764364       | 11 |
| 7  | 676.297054  | 338.652165      |                |                  | 658.286489     | 329.646883       | G    | 967.484338  | 484.245807      | 950.457789     | 475.732533       | 949.473773     | 475.240525       | 10 |
| 8  | 747.334168  | 374.170722      |                |                  | 729.323603     | 365.165440       | A    | 910.462874  | 455.735075      | 893.436325     | 447.221801       | 892.452309     | 446.729793       | 9  |
| 9  | 875.392746  | 438.200011      | 858.366197     | 429.686737       | 857.382181     | 429.194729       | Q    | 839.425760  | 420.216518      | 822.399211     | 411.703244       | 821.415195     | 411.211236       | 8  |
| 10 | 946.429860  | 473.718568      | 929.403311     | 465.205294       | 928.419295     | 464.713286       | A    | 711.367182  | 356.187229      | 694.340633     | 347.673955       | 693.356617     | 347.181947       | 7  |
| 11 | 1109.493189 | 555.250233      | 1092.466640    | 546.736958       | 1091.482624    | 546.244950       | Y    | 640.330068  | 320.668672      | 623.303519     | 312.155398       | 622.319503     | 311.663390       | 6  |
| 12 | 1180.530303 | 590.768790      | 1163.503754    | 582.255515       | 1162.519738    | 581.763507       | A    | 477.266739  | 239.137008      | 460.240190     | 230.623733       | 459.256174     | 230.131725       | 5  |
| 13 | 1267.562331 | 634.284804      | 1250.535782    | 625.771529       | 1249.551766    | 625.279521       | S    | 406.229625  | 203.618451      | 389.203076     | 195.105176       | 388.219060     | 194.613168       | 4  |
| 14 | 1368.610010 | 684.808643      | 1351.583461    | 676.295369       | 1350.599445    | 675.803361       | T    | 319.197597  | 160.102436      | 302.171048     | 151.589162       | 301.187032     | 151.097154       | 3  |
| 15 | 1439.647124 | 720.327200      | 1422.620575    | 711.813926       | 1421.636559    | 711.321918       | A    | 218.149918  | 109.578597      | 201.123369     | 101.065322       |                |                  | 2  |
| 16 |             |                 |                |                  |                |                  | K    | 147.112804  | 74.060040       | 130.086255     | 65.546765        |                |                  | 1  |

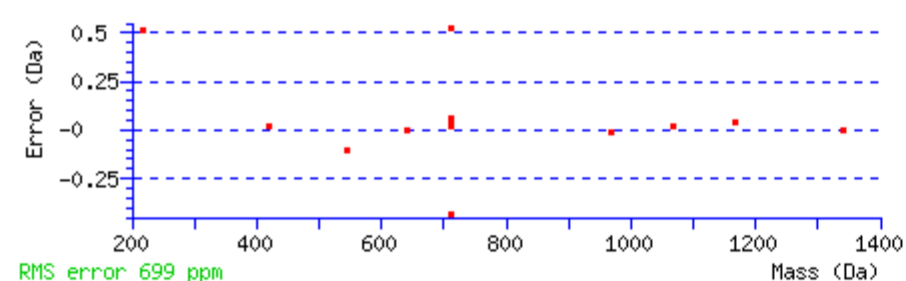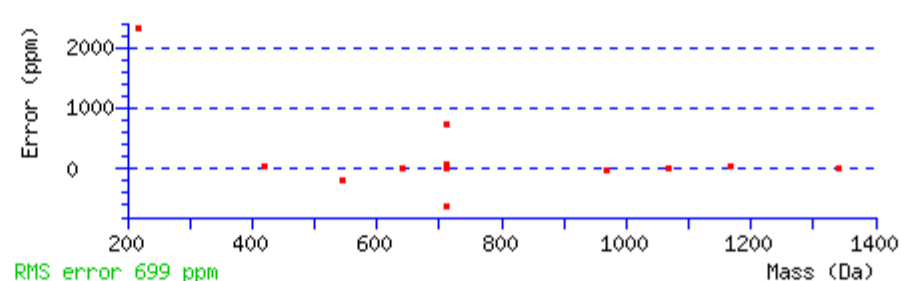

NCBI BLAST search of **MVGDVTGAQAYASTAK**

(Parameters: blastp, nr protein database, expect=20000, no filter, PAM30)

Other BLAST [web gateways](#)

All matches to this query

| Score | $M_r(\text{calc})$ | Delta     | Sequence                         |
|-------|--------------------|-----------|----------------------------------|
| 35.7  | 1584.745377        | 0.004871  | <a href="#">MVGDVTGAQAYASTAK</a> |
| 13.4  | 1584.764465        | -0.014217 | <a href="#">TFPATTYSGNSRQR</a>   |
| 4.0   | 1584.738861        | 0.011387  | <a href="#">SMSTVIRMPDGGFR</a>   |
| 1.0   | 1584.757446        | -0.007198 | <a href="#">LCMSLMQNKQFR</a>     |
| 0.7   | 1584.738846        | 0.011402  | <a href="#">FVRVLCGMSSDER</a>    |

# **MATRIX** SCIENCE Mascot Search Results

## Peptide View

MS/MS Fragmentation of **IGDFGLVTSLK**

Found in **E2AK2\_HUMAN**, Interferon-induced, double-stranded RNA-activated protein kinase OS=Homo sapiens GN=EIF2AK2 PE=1 SV=2

Match to Query 26804: 1148.647048 from(575.330800,2+) rtinseconds(3072) index(42486)

Title: Locus:1.1.1.2605.19

Data file 2011-11-10 - TFD - EP 3-2.mgf

Click mouse within plot area to zoom in by factor of two about that point

Or, Plot from  to  Da

Label all possible matches  Label matches used for scoring

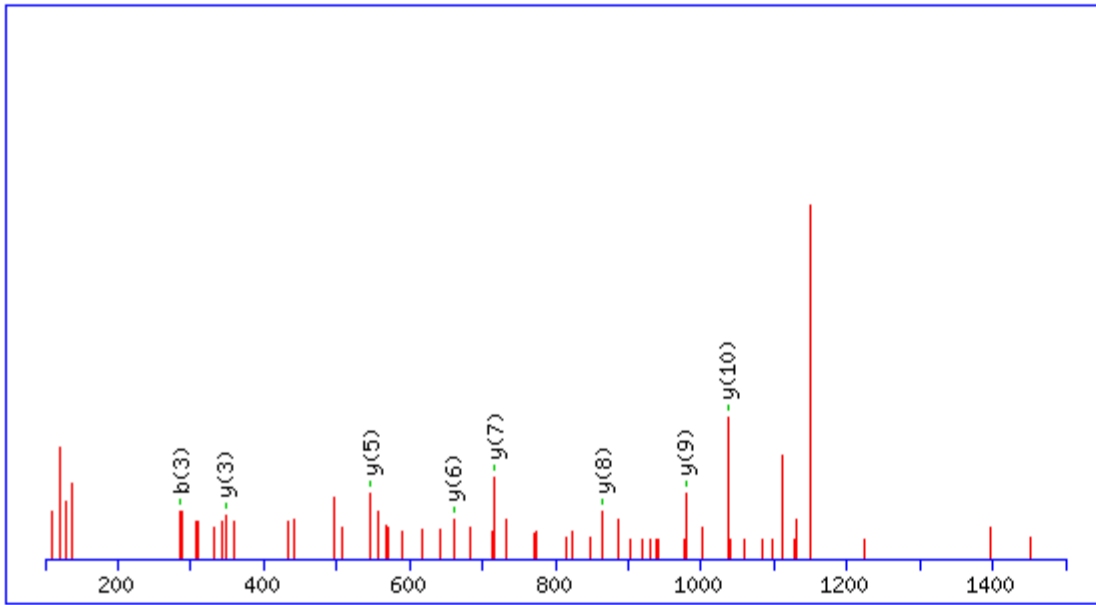

Monoisotopic mass of neutral peptide Mr(calc): 1148.644135

Fixed modifications: Propionamide (C) (apply to specified residues or termini only)

Ions Score: 54 Expect: 3e-005

Matches : 8/92 fragment ions using 11 most intense peaks [\(help\)](#)

| #  | b           | b <sup>++</sup> | b <sup>0</sup> | b <sup>0++</sup> | Seq. | y           | y <sup>++</sup> | y <sup>*</sup> | y <sup>*++</sup> | y <sup>0</sup> | y <sup>0++</sup> | #  |
|----|-------------|-----------------|----------------|------------------|------|-------------|-----------------|----------------|------------------|----------------|------------------|----|
| 1  | 114.091340  | 57.549308       |                |                  | I    |             |                 |                |                  |                |                  | 11 |
| 2  | 171.112804  | 86.060040       |                |                  | G    | 1036.567338 | 518.787307      | 1019.540789    | 510.274033       | 1018.556773    | 509.782025       | 10 |
| 3  | 286.139747  | 143.573512      | 268.129182     | 134.568229       | D    | 979.545874  | 490.276575      | 962.519325     | 481.763300       | 961.535309     | 481.271292       | 9  |
| 4  | 433.208161  | 217.107718      | 415.197596     | 208.102436       | F    | 864.518931  | 432.763104      | 847.492382     | 424.249829       | 846.508366     | 423.757821       | 8  |
| 5  | 490.229625  | 245.618450      | 472.219060     | 236.613168       | G    | 717.450517  | 359.228897      | 700.423968     | 350.715622       | 699.439952     | 350.223614       | 7  |
| 6  | 603.313689  | 302.160483      | 585.303124     | 293.155200       | L    | 660.429053  | 330.718165      | 643.402504     | 322.204890       | 642.418488     | 321.712882       | 6  |
| 7  | 702.382103  | 351.694689      | 684.371538     | 342.689407       | V    | 547.344989  | 274.176133      | 530.318440     | 265.662858       | 529.334424     | 265.170850       | 5  |
| 8  | 803.429782  | 402.218529      | 785.419217     | 393.213246       | T    | 448.276575  | 224.641925      | 431.250026     | 216.128651       | 430.266010     | 215.636643       | 4  |
| 9  | 890.461810  | 445.734543      | 872.451245     | 436.729260       | S    | 347.228896  | 174.118086      | 330.202347     | 165.604811       | 329.218331     | 165.112803       | 3  |
| 10 | 1003.545874 | 502.276575      | 985.535309     | 493.271292       | L    | 260.196868  | 130.602072      | 243.170319     | 122.088798       |                |                  | 2  |
| 11 |             |                 |                |                  | K    | 147.112804  | 74.060040       | 130.086255     | 65.546765        |                |                  | 1  |

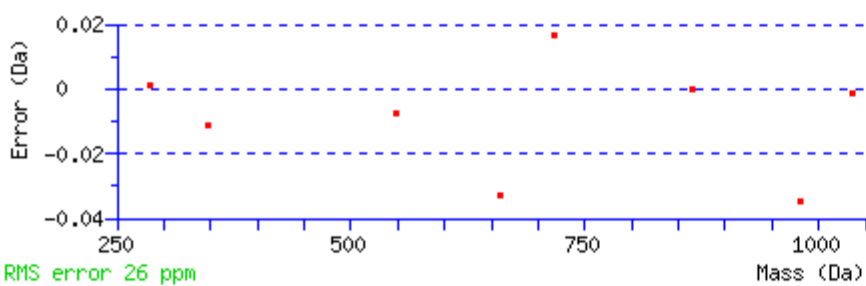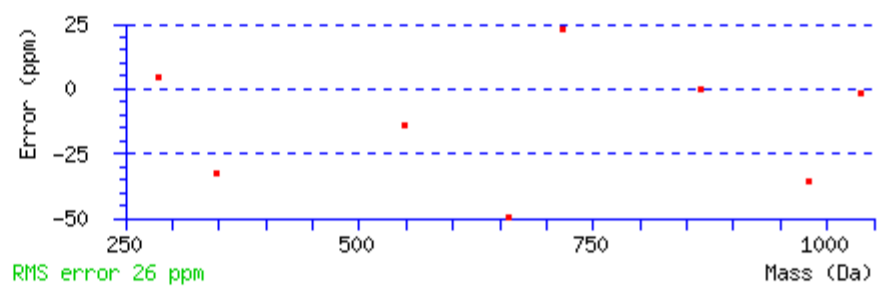

NCBI BLAST search of [IGDFGLVTSLK](#)

(Parameters: blastp, nr protein database, expect=20000, no filter, PAM30)

Other BLAST [web gateways](#)

All matches to this query

| Score | Mr(calc):   | Delta    | Sequence                    |
|-------|-------------|----------|-----------------------------|
| 53.5  | 1148.644135 | 0.002913 | <a href="#">IGDFGLVTSLK</a> |

Mascot: <http://www.matrixscience.com/>

# **MASCOT** Mascot Search Results

## Peptide View

MS/MS Fragmentation of **KIEDLIQSM**

Found in **IL15\_HUMAN**, Interleukin-15 OS=Homo sapiens GN=IL15 PE=1 SV=1

Match to Query 14458: 1091.560128 from(546.787340,2+) rtinseconds(2561) index(33279)

Title: Locus:1.1.1.1355.20

Data file 2012-01-27 - TFD - Epitel - IEC - 10ul - 2.mgf

Click mouse within plot area to zoom in by factor of two about that point

Or, Plot from  to  Da

Label all possible matches  Label matches used for scoring

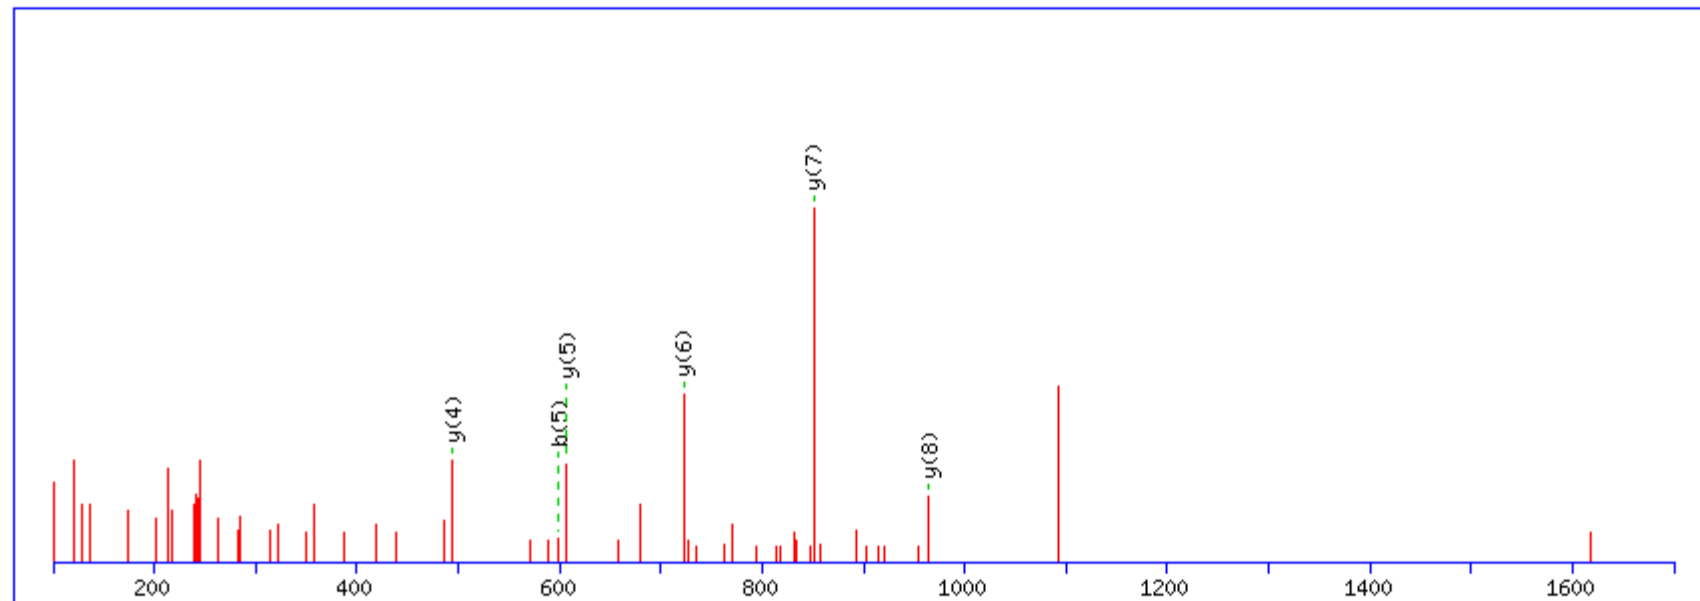

Monoisotopic mass of neutral peptide **Mr(calc): 1091.553238**

Fixed modifications: Carbamidomethyl (C) (apply to specified residues or termini only)

Variable modifications:

M9 : Oxidation (M), with neutral losses 0.000000 (shown in table), 63.998285

Ions Score: 32 Expect: 0.0064

Matches : 6/128 fragment ions using 9 most intense peaks [\(help\)](#)

| # | b                 | b <sup>++</sup> | b <sup>*</sup> | b <sup>***</sup> | b <sup>0</sup> | b <sup>0++</sup> | Seq.     | y                 | y <sup>++</sup> | y <sup>*</sup> | y <sup>***</sup> | y <sup>0</sup> | y <sup>0++</sup> | #        |
|---|-------------------|-----------------|----------------|------------------|----------------|------------------|----------|-------------------|-----------------|----------------|------------------|----------------|------------------|----------|
| 1 | 129.102239        | 65.054757       | 112.075690     | 56.541483        |                |                  | <b>K</b> |                   |                 |                |                  |                |                  | <b>9</b> |
| 2 | 242.186303        | 121.596790      | 225.159754     | 113.083515       |                |                  | <b>I</b> | <b>964.465575</b> | 482.736426      | 947.439026     | 474.223151       | 946.455010     | 473.731143       | <b>8</b> |
| 3 | 371.228896        | 186.118086      | 354.202347     | 177.604812       | 353.218331     | 177.112804       | <b>E</b> | <b>851.381511</b> | 426.194394      | 834.354962     | 417.681119       | 833.370946     | 417.189111       | <b>7</b> |
| 4 | 486.255839        | 243.631558      | 469.229290     | 235.118283       | 468.245274     | 234.626275       | <b>D</b> | <b>722.338918</b> | 361.673097      | 705.312369     | 353.159823       | 704.328353     | 352.667815       | <b>6</b> |
| 5 | <b>599.339903</b> | 300.173590      | 582.313354     | 291.660315       | 581.329338     | 291.168307       | <b>L</b> | <b>607.311975</b> | 304.159626      | 590.285426     | 295.646351       | 589.301410     | 295.154343       | <b>5</b> |
| 6 | 712.423967        | 356.715622      | 695.397418     | 348.202347       | 694.413402     | 347.710339       | <b>I</b> | <b>494.227911</b> | 247.617594      | 477.201362     | 239.104319       | 476.217346     | 238.612311       | <b>4</b> |
| 7 | 840.482545        | 420.744911      | 823.455996     | 412.231636       | 822.471980     | 411.739628       | <b>Q</b> | 381.143847        | 191.075562      | 364.117298     | 182.562287       | 363.133282     | 182.070279       | <b>3</b> |
| 8 | 927.514573        | 464.260925      | 910.488024     | 455.747650       | 909.504008     | 455.255642       | <b>S</b> | 253.085269        | 127.046273      |                |                  | 235.074704     | 118.040990       | <b>2</b> |
| 9 |                   |                 |                |                  |                |                  | <b>M</b> | 166.053241        | 83.530259       |                |                  |                |                  | <b>1</b> |

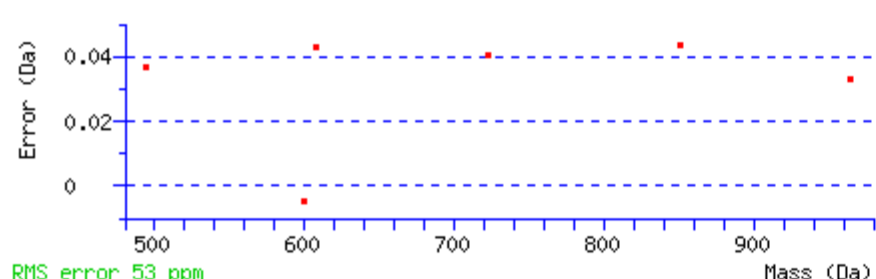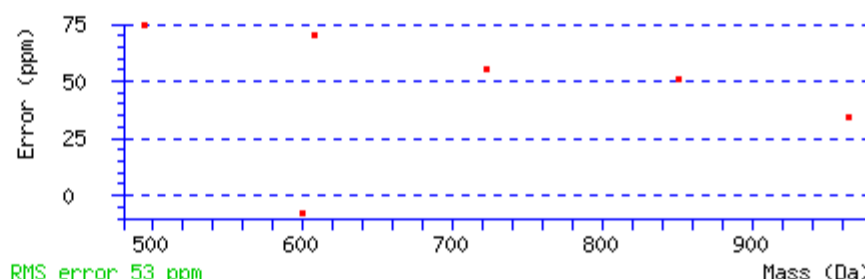

NCBI BLAST search of **KIEDLIQSM**

(Parameters: blastp, nr protein database, expect=20000, no filter, PAM30)

Other BLAST [web gateways](#)

All matches to this query

| Score | Mr(calc):   | Delta     | Sequence                   |
|-------|-------------|-----------|----------------------------|
| 32.3  | 1091.553238 | 0.006890  | <a href="#">KIEDLIQSM</a>  |
| 8.6   | 1091.553238 | 0.006890  | <a href="#">KLELQVESM</a>  |
| 8.2   | 1091.564484 | -0.004356 | <a href="#">KIQTQISSGM</a> |
| 5.6   | 1091.561096 | -0.000968 | <a href="#">QLYELSPSR</a>  |
| 3.4   | 1091.568497 | -0.008369 | <a href="#">FLPQLSMEK</a>  |
| 2.8   | 1091.553253 | 0.006875  | <a href="#">SILATLPTNM</a> |

# Mascot Search Results

## Peptide View

MS/MS Fragmentation of **EFLVSEKLPEHTK**

Found in **IL31R\_HUMAN**, Interleukin-31 receptor subunit alpha OS=Homo sapiens GN=IL31RA PE=1 SV=1

Match to Query 50176: 1571.830388 from(786.922470,2+) rtinseconds(4319) index(66296)

Title: Locus:1.1.1.2931.37

Data file 2011-11-12 - TFD - EP 6-4.mgf

Click mouse within plot area to zoom in by factor of two about that point

Or, Plot from  to  Da

Label all possible matches  Label matches used for scoring

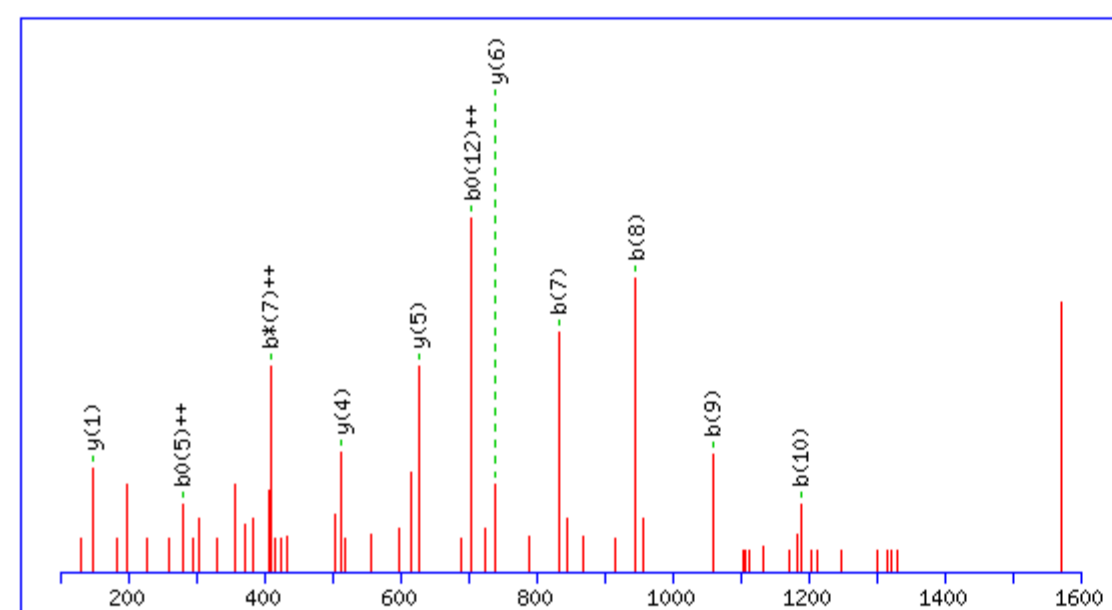

Monoisotopic mass of neutral peptide Mr(calc): 1571.819504

Fixed modifications: Propionamide (C) (apply to specified residues or termini only)

Variable modifications:

P9 : Oxidation (P)

Ions Score: 34 Expect: 0.0059

Matches : 11/130 fragment ions using 13 most intense peaks [\(help\)](#)

| #  | b           | b <sup>++</sup> | b <sup>+</sup> | b <sup>*++</sup> | b <sup>0</sup> | b <sup>0++</sup> | Seq. | y           | y <sup>++</sup> | y <sup>+</sup> | y <sup>*++</sup> | y <sup>0</sup> | y <sup>0++</sup> | #  |
|----|-------------|-----------------|----------------|------------------|----------------|------------------|------|-------------|-----------------|----------------|------------------|----------------|------------------|----|
| 1  | 130.049869  | 65.528572       |                |                  | 112.039304     | 56.523290        | E    |             |                 |                |                  |                |                  | 13 |
| 2  | 277.118283  | 139.062779      |                |                  | 259.107718     | 130.057497       | F    | 1443.784207 | 722.395742      | 1426.757658    | 713.882467       | 1425.773642    | 713.390459       | 12 |
| 3  | 390.202347  | 195.604811      |                |                  | 372.191782     | 186.599529       | L    | 1296.715793 | 648.861535      | 1279.689244    | 640.348260       | 1278.705228    | 639.856252       | 11 |
| 4  | 489.270761  | 245.139018      |                |                  | 471.260196     | 236.133736       | V    | 1183.631729 | 592.319503      | 1166.605180    | 583.806228       | 1165.621164    | 583.314220       | 10 |
| 5  | 576.302789  | 288.655033      |                |                  | 558.292224     | 279.649750       | S    | 1084.563315 | 542.785296      | 1067.536766    | 534.272021       | 1066.552750    | 533.780013       | 9  |
| 6  | 705.345382  | 353.176329      |                |                  | 687.334817     | 344.171047       | E    | 997.531287  | 499.269282      | 980.504738     | 490.756007       | 979.520722     | 490.263999       | 8  |
| 7  | 833.440345  | 417.223811      | 816.413796     | 408.710536       | 815.429780     | 408.218528       | K    | 868.488694  | 434.747985      | 851.462145     | 426.234711       | 850.478129     | 425.742703       | 7  |
| 8  | 946.524409  | 473.765843      | 929.497860     | 465.252568       | 928.513844     | 464.760560       | L    | 740.393731  | 370.700504      | 723.367182     | 362.187229       | 722.383166     | 361.695221       | 6  |
| 9  | 1059.572088 | 530.289682      | 1042.545539    | 521.776408       | 1041.561523    | 521.284400       | P    | 627.309667  | 314.158472      | 610.283118     | 305.645197       | 609.299102     | 305.153189       | 5  |
| 10 | 1188.614681 | 594.810979      | 1171.588132    | 586.297704       | 1170.604116    | 585.805696       | E    | 514.261988  | 257.634632      | 497.235439     | 249.121358       | 496.251423     | 248.629350       | 4  |
| 11 | 1325.673593 | 663.340435      | 1308.647044    | 654.827160       | 1307.663028    | 654.335152       | H    | 385.219395  | 193.113335      | 368.192846     | 184.600061       | 367.208830     | 184.108053       | 3  |
| 12 | 1426.721272 | 713.864274      | 1409.694723    | 705.351000       | 1408.710707    | 704.858992       | T    | 248.160483  | 124.583879      | 231.133934     | 116.070605       | 230.149918     | 115.578597       | 2  |
| 13 |             |                 |                |                  |                |                  | K    | 147.112804  | 74.060040       | 130.086255     | 65.546765        |                |                  | 1  |

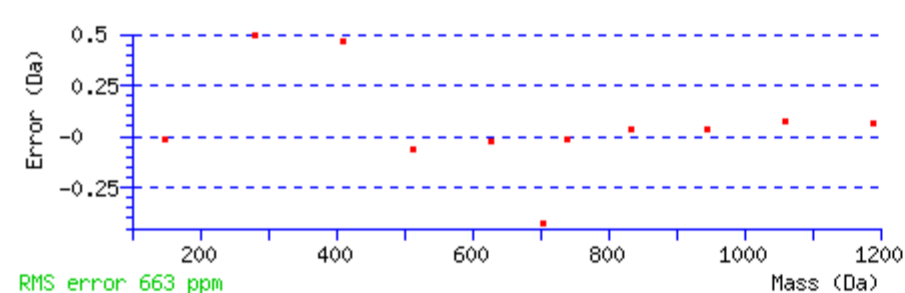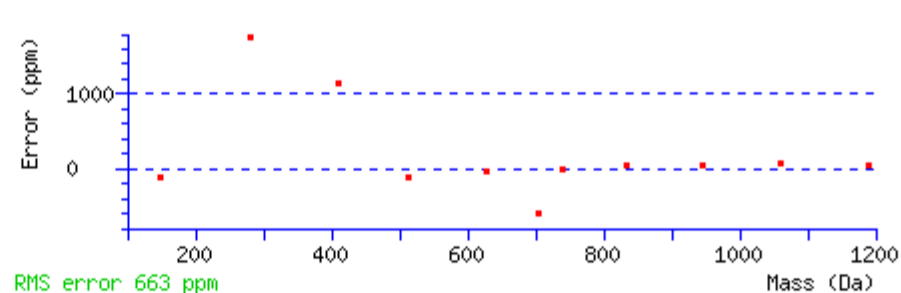

NCBI BLAST search of **EFLVSEKLPEHTK**

(Parameters: blastp, nr protein database, expect=20000, no filter, PAM30)

Other BLAST [web gateways](#)

All matches to this query

| Score | Mr(calc):   | Delta    | Sequence                      |
|-------|-------------|----------|-------------------------------|
| 33.7  | 1571.819504 | 0.010884 | <a href="#">EFLVSEKLPEHTK</a> |

Mascot: <http://www.matrixscience.com/>



**Peptide View**

MS/MS Fragmentation of **DVAEAKPELSLLGDGDH**

Found in **IAH1\_HUMAN**, Isoamyl acetate-hydrolyzing esterase 1 homolog OS=Homo sapiens GN=IAH1 PE=1 SV=1

Match to Query 51151: 1764.845382 from(589.289070,3+) rtinseconds(2633) index(30458)

Title: Locus:1.1.1.2588.20

Data file 2011-11-12 - TFD - EP 5-5.mgf

Click mouse within plot area to zoom in by factor of two about that point

Or, Plot from  to  Da

Label all possible matches  Label matches used for scoring

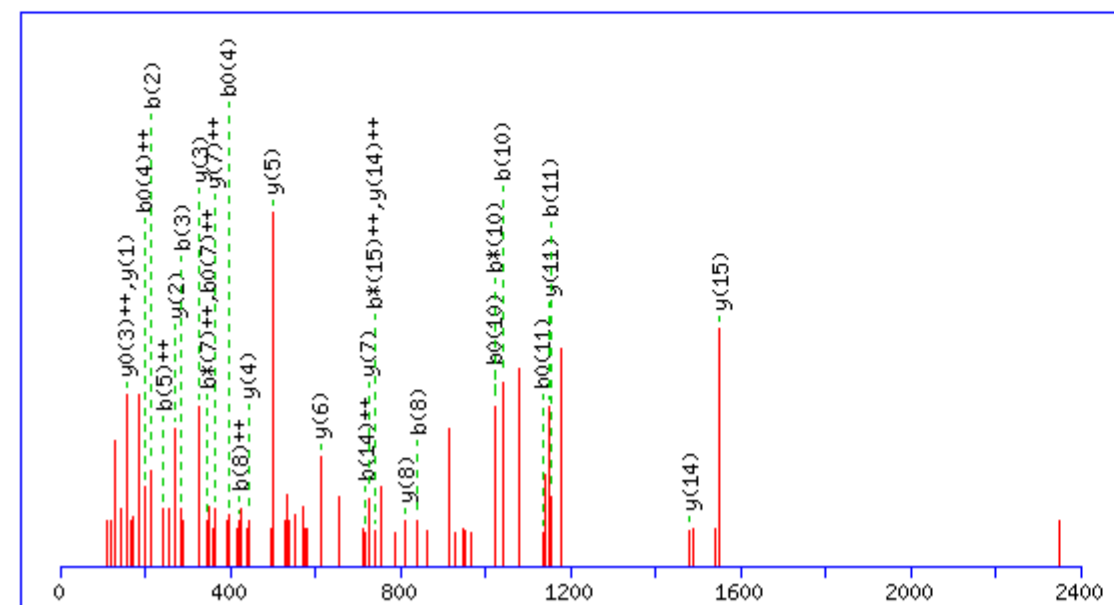

Monoisotopic mass of neutral peptide Mr(calcd): 1764.852997

Fixed modifications: Propionamide (C) (apply to specified residues or termini only)

Ions Score: 61 Expect: 9.4e-006

Matches : 30/158 fragment ions using 54 most intense peaks [\(help\)](#)

| #  | b                  | b <sup>++</sup>   | b <sup>+</sup>     | b <sup>*++</sup>  | b <sup>0</sup>     | b <sup>0++</sup>  | Seq. | y                  | y <sup>++</sup>   | y <sup>+</sup> | y <sup>*++</sup> | y <sup>0</sup> | y <sup>0++</sup>  | #  |
|----|--------------------|-------------------|--------------------|-------------------|--------------------|-------------------|------|--------------------|-------------------|----------------|------------------|----------------|-------------------|----|
| 1  | 116.034219         | 58.520748         |                    |                   | 98.023654          | 49.515465         | D    |                    |                   |                |                  |                |                   | 17 |
| 2  | <b>215.102633</b>  | 108.054954        |                    |                   | 197.092068         | 99.049672         | V    | 1650.833342        | 825.920309        | 1633.806793    | 817.407035       | 1632.822777    | 816.915026        | 16 |
| 3  | <b>286.139747</b>  | 143.573512        |                    |                   | 268.129182         | 134.568229        | A    | <b>1551.764928</b> | 776.386102        | 1534.738379    | 767.872828       | 1533.754363    | 767.380820        | 15 |
| 4  | 415.182340         | 208.094808        |                    |                   | <b>397.171775</b>  | <b>199.089526</b> | E    | <b>1480.727814</b> | <b>740.867545</b> | 1463.701265    | 732.354271       | 1462.717249    | 731.862263        | 14 |
| 5  | 486.219454         | <b>243.613365</b> |                    |                   | 468.208889         | 234.608082        | A    | 1351.685221        | 676.346249        | 1334.658672    | 667.832974       | 1333.674656    | 667.340966        | 13 |
| 6  | 614.314417         | 307.660847        | 597.287868         | 299.147572        | 596.303852         | 298.655564        | K    | 1280.648107        | 640.827692        | 1263.621558    | 632.314417       | 1262.637542    | 631.822409        | 12 |
| 7  | 711.367181         | 356.187229        | 694.340632         | <b>347.673954</b> | 693.356616         | <b>347.181946</b> | P    | <b>1152.553144</b> | 576.780210        |                |                  | 1134.542579    | 567.774927        | 11 |
| 8  | <b>840.409774</b>  | <b>420.708525</b> | 823.383225         | 412.195251        | 822.399209         | 411.703243        | E    | 1055.500380        | 528.253828        |                |                  | 1037.489815    | 519.248545        | 10 |
| 9  | 953.493838         | 477.250557        | 936.467289         | 468.737283        | 935.483273         | 468.245275        | L    | 926.457787         | 463.732531        |                |                  | 908.447222     | 454.727249        | 9  |
| 10 | <b>1040.525866</b> | 520.766571        | <b>1023.499317</b> | 512.253297        | <b>1022.515301</b> | 511.761289        | S    | <b>813.373723</b>  | 407.190499        |                |                  | 795.363158     | 398.185217        | 8  |
| 11 | <b>1153.609930</b> | 577.308603        | 1136.583381        | 568.795329        | <b>1135.599365</b> | 568.303321        | L    | <b>726.341695</b>  | <b>363.674485</b> |                |                  | 708.331130     | 354.669203        | 7  |
| 12 | 1266.693994        | 633.850635        | 1249.667445        | 625.337361        | 1248.683429        | 624.845352        | L    | <b>613.257631</b>  | 307.132454        |                |                  | 595.247066     | 298.127171        | 6  |
| 13 | 1323.715458        | 662.361367        | 1306.688909        | 653.848093        | 1305.704893        | 653.356084        | G    | <b>500.173567</b>  | 250.590421        |                |                  | 482.163002     | 241.585139        | 5  |
| 14 | 1438.742401        | <b>719.874839</b> | 1421.715852        | 711.361564        | 1420.731836        | 710.869556        | D    | <b>443.152103</b>  | 222.079690        |                |                  | 425.141538     | 213.074407        | 4  |
| 15 | 1495.763865        | 748.385570        | 1478.737316        | <b>739.872296</b> | 1477.753300        | 739.380288        | G    | <b>328.125160</b>  | 164.566218        |                |                  | 310.114595     | <b>155.560935</b> | 3  |
| 16 | 1610.790808        | 805.899042        | 1593.764259        | 797.385768        | 1592.780243        | 796.893759        | D    | <b>271.103696</b>  | 136.055486        |                |                  | 253.093131     | 127.050204        | 2  |
| 17 |                    |                   |                    |                   |                    |                   | H    | <b>156.076753</b>  | 78.542014         |                |                  |                |                   | 1  |

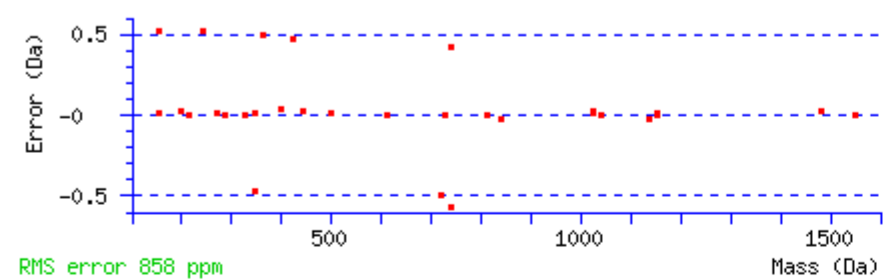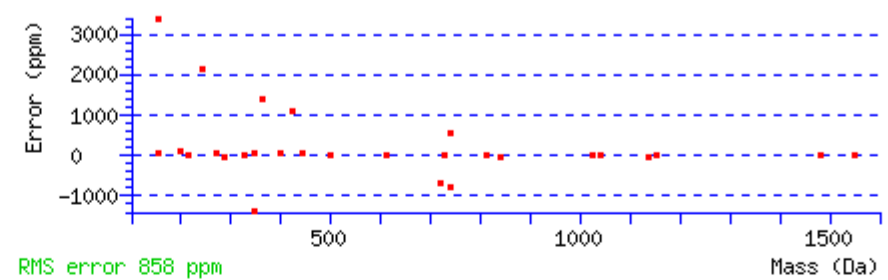

NCBI BLAST search of [DVAEAKPELSLLGDGDH](#)

(Parameters: blastp, nr protein database, expect=20000, no filter, PAM30)

Other BLAST [web gateways](#)

**All matches to this query**

| Score | Mr(calcd):  | Delta     | Sequence                          |
|-------|-------------|-----------|-----------------------------------|
| 60.9  | 1764.852997 | -0.007615 | <a href="#">DVAEAKPELSLLGDGDH</a> |

**Peptide View**

MS/MS Fragmentation of **HNIAYFPQIVSVAAR**

Found in **ISOC2\_HUMAN**, Isochorismatase domain-containing protein 2, mitochondrial OS=Homo sapiens GN=ISOC2 PE=1 SV=1

Match to Query 50632: 1684.905822 from(562.642550,3+) rtinseconds(2994) index(40164)

Title: Locus:1.1.1.2430.15

Data file 2011-11-12 - TFD - EP 6-5.mgf

Click mouse within plot area to zoom in by factor of two about that point

Or, Plot from  to  Da

Label all possible matches  Label matches used for scoring

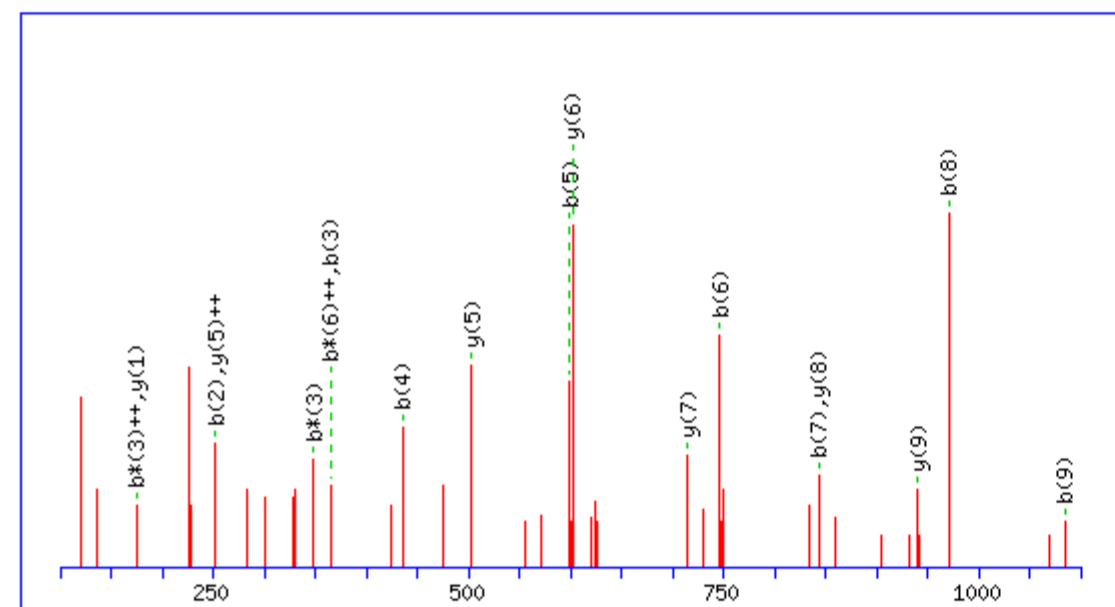

Monoisotopic mass of neutral peptide Mr(calc): 1684.904907

Fixed modifications: Propionamide (C) (apply to specified residues or termini only)

Ions Score: 46 Expect: 0.00016

Matches : 18/138 fragment ions using 29 most intense peaks [\(help\)](#)

| #  | b                  | b <sup>++</sup> | b <sup>*</sup>    | b <sup>*++</sup>  | b <sup>0</sup> | b <sup>0++</sup> | Seq. | y                 | y <sup>++</sup>   | y <sup>*</sup> | y <sup>*++</sup> | y <sup>0</sup> | y <sup>0++</sup> | #  |
|----|--------------------|-----------------|-------------------|-------------------|----------------|------------------|------|-------------------|-------------------|----------------|------------------|----------------|------------------|----|
| 1  | 138.066188         | 69.536732       |                   |                   |                |                  | H    |                   |                   |                |                  |                |                  | 15 |
| 2  | <b>252.109115</b>  | 126.558195      | 235.082566        | 118.044921        |                |                  | N    | 1548.853290       | 774.930283        | 1531.826741    | 766.417009       | 1530.842725    | 765.925001       | 14 |
| 3  | <b>365.193179</b>  | 183.100227      | <b>348.166630</b> | <b>174.586953</b> |                |                  | I    | 1434.810363       | 717.908820        | 1417.783814    | 709.395545       | 1416.799798    | 708.903537       | 13 |
| 4  | <b>436.230293</b>  | 218.618785      | 419.203744        | 210.105510        |                |                  | A    | 1321.726299       | 661.366788        | 1304.699750    | 652.853513       | 1303.715734    | 652.361505       | 12 |
| 5  | <b>599.293622</b>  | 300.150449      | 582.267073        | 291.637175        |                |                  | Y    | 1250.689185       | 625.848231        | 1233.662636    | 617.334956       | 1232.678620    | 616.842948       | 11 |
| 6  | <b>746.362036</b>  | 373.684656      | 729.335487        | <b>365.171382</b> |                |                  | F    | 1087.625856       | 544.316566        | 1070.599307    | 535.803292       | 1069.615291    | 535.311284       | 10 |
| 7  | <b>843.414800</b>  | 422.211038      | 826.388251        | 413.697764        |                |                  | P    | <b>940.557442</b> | 470.782359        | 923.530893     | 462.269085       | 922.546877     | 461.777077       | 9  |
| 8  | <b>971.473378</b>  | 486.240327      | 954.446829        | 477.727053        |                |                  | Q    | <b>843.504678</b> | 422.255977        | 826.478129     | 413.742703       | 825.494113     | 413.250695       | 8  |
| 9  | <b>1084.557442</b> | 542.782359      | 1067.530893       | 534.269085        |                |                  | I    | <b>715.446100</b> | 358.226688        | 698.419551     | 349.713414       | 697.435535     | 349.221406       | 7  |
| 10 | 1183.625856        | 592.316566      | 1166.599307       | 583.803292        |                |                  | V    | <b>602.362036</b> | 301.684656        | 585.335487     | 293.171382       | 584.351471     | 292.679374       | 6  |
| 11 | 1270.657884        | 635.832580      | 1253.631335       | 627.319306        | 1252.647319    | 626.827298       | S    | <b>503.293622</b> | <b>252.150449</b> | 486.267073     | 243.637175       | 485.283057     | 243.145167       | 5  |
| 12 | 1369.726298        | 685.366787      | 1352.699749       | 676.853513        | 1351.715733    | 676.361505       | V    | 416.261594        | 208.634435        | 399.235045     | 200.121160       |                |                  | 4  |
| 13 | 1440.763412        | 720.885344      | 1423.736863       | 712.372070        | 1422.752847    | 711.880062       | A    | 317.193180        | 159.100228        | 300.166631     | 150.586953       |                |                  | 3  |
| 14 | 1511.800526        | 756.403901      | 1494.773977       | 747.890627        | 1493.789961    | 747.398619       | A    | 246.156066        | 123.581671        | 229.129517     | 115.068396       |                |                  | 2  |
| 15 |                    |                 |                   |                   |                |                  | R    | <b>175.118952</b> | 88.063114         | 158.092403     | 79.549839        |                |                  | 1  |

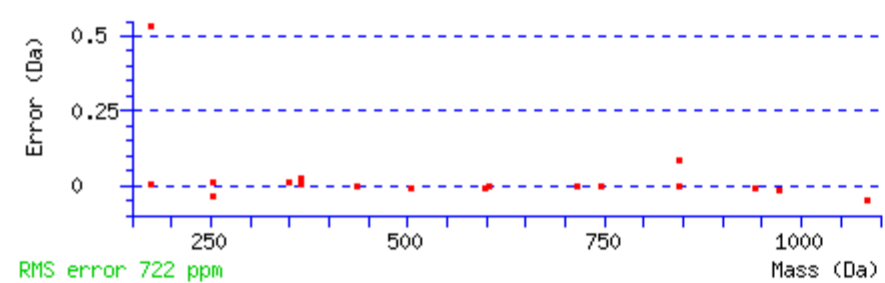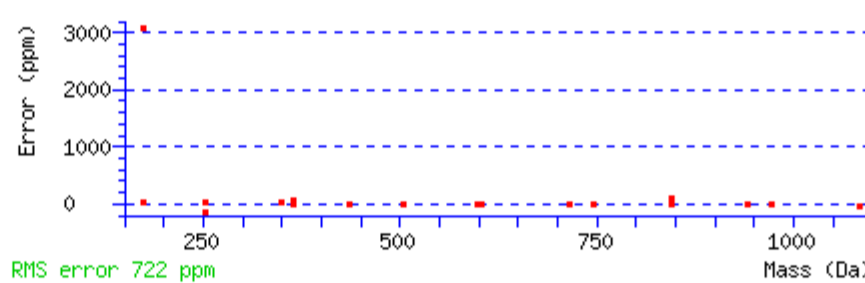

NCBI BLAST search of [HNIAYFPQIVSVAAR](#)

(Parameters: blastp, nr protein database, expect=20000, no filter, PAM30)

Other BLAST [web gateways](#)

**All matches to this query**

| Score | Mr(calc):   | Delta     | Sequence                        |
|-------|-------------|-----------|---------------------------------|
| 45.6  | 1684.904907 | 0.000915  | <a href="#">HNIAYFPQIVSVAAR</a> |
| 4.8   | 1684.918182 | -0.012360 | <a href="#">CVDLVIQELINTVR</a>  |
| 2.3   | 1684.903564 | 0.002258  | <a href="#">WDGKDLEDLQILIK</a>  |

# Mascot Search Results

## Peptide View

MS/MS Fragmentation of **AFSVFLFNTENK**

Found in **IDI1\_HUMAN**, Isopentenyl-diphosphate Delta-isomerase 1 OS=Homo sapiens GN=IDI1 PE=1 SV=2

Match to Query 41860: 1415.705348 from(708.859950,2+) rtinseconds(3558) index(48135)

Title: Locus:1.1.1.2667.12

Data file 2011-11-10 - TFD - EP 4-5.mgf

Click mouse within plot area to zoom in by factor of two about that point

Or, Plot from  to  Da

Label all possible matches  Label matches used for scoring

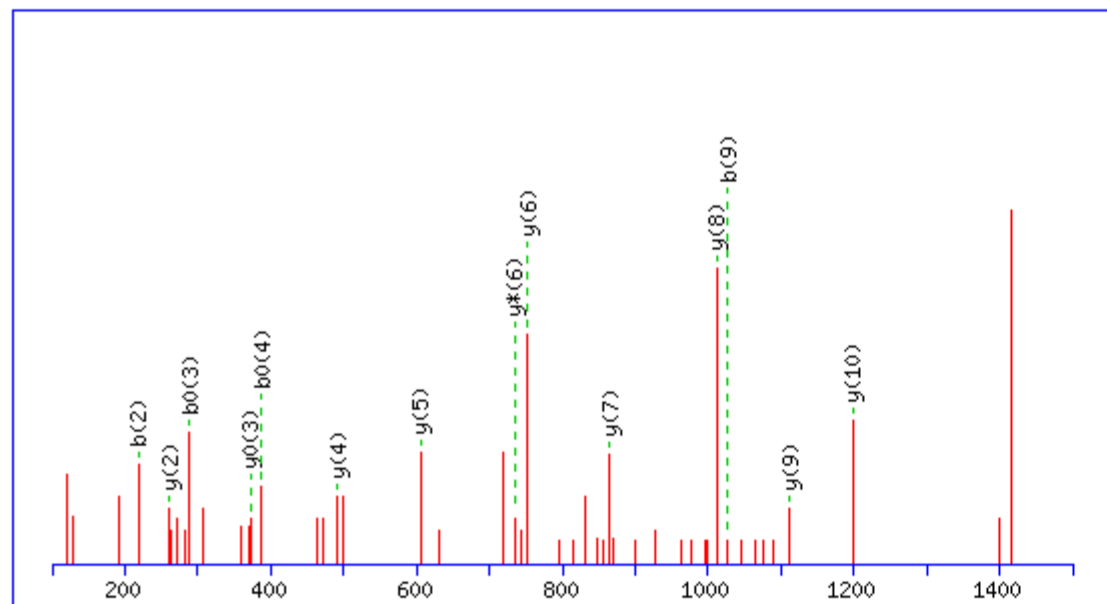

Monoisotopic mass of neutral peptide Mr(calc): 1415.708511

Fixed modifications: Propionamide (C) (apply to specified residues or termini only)

Ions Score: 59 Expect: 9e-006

Matches : 14/110 fragment ions using 23 most intense peaks [\(help\)](#)

| #  | b                  | b <sup>++</sup> | b <sup>*</sup> | b <sup>*++</sup> | b <sup>0</sup>    | b <sup>0++</sup> | Seq. | y                  | y <sup>++</sup> | y <sup>*</sup>    | y <sup>*++</sup> | y <sup>0</sup>    | y <sup>0++</sup> | #  |
|----|--------------------|-----------------|----------------|------------------|-------------------|------------------|------|--------------------|-----------------|-------------------|------------------|-------------------|------------------|----|
| 1  | 72.044390          | 36.525833       |                |                  |                   |                  | A    |                    |                 |                   |                  |                   |                  | 12 |
| 2  | <b>219.112804</b>  | 110.060040      |                |                  |                   |                  | F    | 1345.678678        | 673.342977      | 1328.652129       | 664.829703       | 1327.668113       | 664.337695       | 11 |
| 3  | 306.144832         | 153.576054      |                |                  | <b>288.134267</b> | 144.570772       | S    | <b>1198.610264</b> | 599.808770      | 1181.583715       | 591.295496       | 1180.599699       | 590.803488       | 10 |
| 4  | 405.213246         | 203.110261      |                |                  | <b>387.202681</b> | 194.104979       | V    | <b>1111.578236</b> | 556.292756      | 1094.551687       | 547.779482       | 1093.567671       | 547.287474       | 9  |
| 5  | 552.281660         | 276.644468      |                |                  | 534.271095        | 267.639186       | F    | <b>1012.509822</b> | 506.758549      | 995.483273        | 498.245275       | 994.499257        | 497.753267       | 8  |
| 6  | 665.365724         | 333.186500      |                |                  | 647.355159        | 324.181218       | L    | <b>865.441408</b>  | 433.224342      | 848.414859        | 424.711068       | 847.430843        | 424.219060       | 7  |
| 7  | 812.434138         | 406.720707      |                |                  | 794.423573        | 397.715425       | F    | <b>752.357344</b>  | 376.682310      | <b>735.330795</b> | 368.169036       | 734.346779        | 367.677028       | 6  |
| 8  | 926.477065         | 463.742171      | 909.450516     | 455.228896       | 908.466500        | 454.736888       | N    | <b>605.288930</b>  | 303.148103      | 588.262381        | 294.634829       | 587.278365        | 294.142821       | 5  |
| 9  | <b>1027.524744</b> | 514.266010      | 1010.498195    | 505.752736       | 1009.514179       | 505.260728       | T    | <b>491.246003</b>  | 246.126640      | 474.219454        | 237.613365       | 473.235438        | 237.121357       | 4  |
| 10 | 1156.567337        | 578.787307      | 1139.540788    | 570.274032       | 1138.556772       | 569.782024       | E    | 390.198324         | 195.602800      | 373.171775        | 187.089526       | <b>372.187759</b> | 186.597518       | 3  |
| 11 | 1270.610264        | 635.808770      | 1253.583715    | 627.295496       | 1252.599699       | 626.803488       | N    | <b>261.155731</b>  | 131.081503      | 244.129182        | 122.568229       |                   |                  | 2  |
| 12 |                    |                 |                |                  |                   |                  | K    | 147.112804         | 74.060040       | 130.086255        | 65.546765        |                   |                  | 1  |

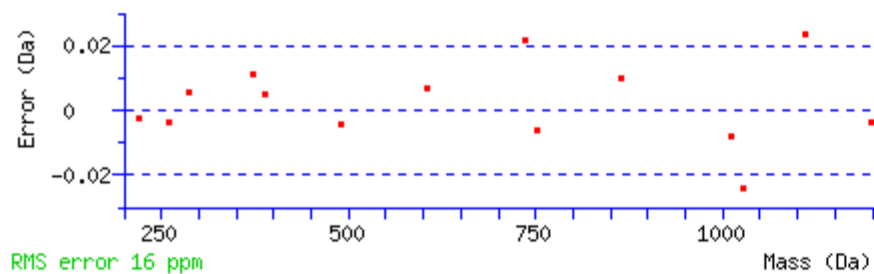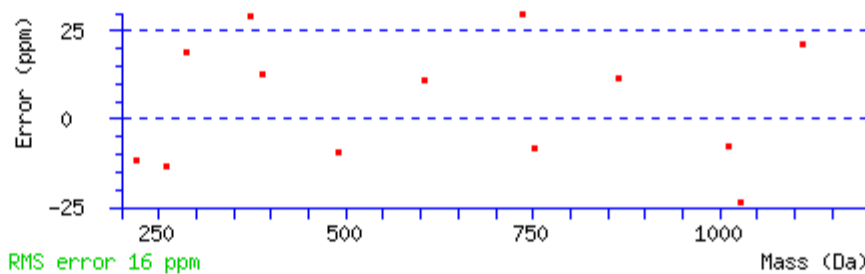

NCBI BLAST search of **AFSVFLFNTENK**

(Parameters: blastp, nr protein database, expect=20000, no filter, PAM30)

Other BLAST [web gateways](#)

All matches to this query

| Score | Mr(calc):   | Delta     | Sequence                     |
|-------|-------------|-----------|------------------------------|
| 58.9  | 1415.708511 | -0.003163 | <a href="#">AFSVFLFNTENK</a> |
| 5.1   | 1415.704498 | 0.000850  | <a href="#">AFQVIETQDPPR</a> |

# **MASCOT** Mascot Search Results

## Peptide View

MS/MS Fragmentation of **TYQQSCVSSCR**

Found in **KR111\_HUMAN**, Keratin-associated protein 11-1 OS=Homo sapiens GN=KRTAP11-1 PE=1 SV=1

Match to Query 722686: 1374.577868 from(688.296210,2+) rtinseconds(1043) index(244586)

Title: Locus:1.1.1.838.39

Data file C:\Program Files (x86)\Matrix Science\Mascot Daemon\mgf3 TFD - Epitel - R2\mascot\_daemon\_merge.mgf

Click mouse within plot area to zoom in by factor of two about that point

Or, Plot from  to  Da

Label all possible matches  Label matches used for scoring

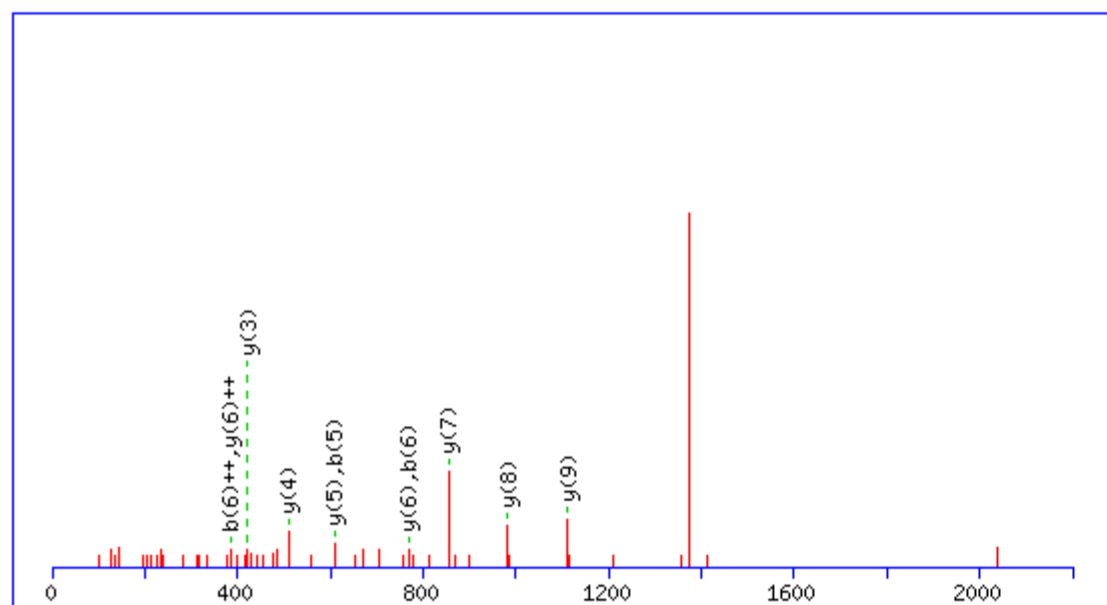

Monoisotopic mass of neutral peptide Mr(calc): 1374.565643

Fixed modifications: Carbamidomethyl (C) (apply to specified residues or termini only)

Ions Score: 53 Expect: 2.3e-005

Matches : 11/112 fragment ions using 12 most intense peaks [\(help\)](#)

| #  | b                 | b <sup>++</sup>   | b <sup>*</sup> | b <sup>*++</sup> | b <sup>0</sup> | b <sup>0++</sup> | Seq. | y                  | y <sup>++</sup>   | y <sup>*</sup> | y <sup>*++</sup> | y <sup>0</sup> | y <sup>0++</sup> | #  |
|----|-------------------|-------------------|----------------|------------------|----------------|------------------|------|--------------------|-------------------|----------------|------------------|----------------|------------------|----|
| 1  | 102.054955        | 51.531116         |                |                  | 84.044390      | 42.525833        | T    |                    |                   |                |                  |                |                  | 11 |
| 2  | 265.118284        | 133.062780        |                |                  | 247.107719     | 124.057498       | Y    | 1274.525233        | 637.766255        | 1257.498684    | 629.252980       | 1256.514668    | 628.760972       | 10 |
| 3  | 393.176862        | 197.092069        | 376.150313     | 188.578795       | 375.166297     | 188.086787       | Q    | <b>1111.461904</b> | 556.234590        | 1094.435355    | 547.721316       | 1093.451339    | 547.229308       | 9  |
| 4  | 521.235440        | 261.121358        | 504.208891     | 252.608084       | 503.224875     | 252.116076       | Q    | <b>983.403326</b>  | 492.205301        | 966.376777     | 483.692027       | 965.392761     | 483.200019       | 8  |
| 5  | <b>608.267468</b> | 304.637372        | 591.240919     | 296.124098       | 590.256903     | 295.632090       | S    | <b>855.344748</b>  | 428.176012        | 838.318199     | 419.662737       | 837.334183     | 419.170729       | 7  |
| 6  | <b>768.298117</b> | <b>384.652697</b> | 751.271568     | 376.139422       | 750.287552     | 375.647414       | C    | <b>768.312720</b>  | <b>384.659998</b> | 751.286171     | 376.146724       | 750.302155     | 375.654716       | 6  |
| 7  | 867.366531        | 434.186904        | 850.339982     | 425.673629       | 849.355966     | 425.181621       | V    | <b>608.282071</b>  | 304.644674        | 591.255522     | 296.131399       | 590.271506     | 295.639391       | 5  |
| 8  | 954.398559        | 477.702918        | 937.372010     | 469.189643       | 936.387994     | 468.697635       | S    | <b>509.213657</b>  | 255.110466        | 492.187108     | 246.597192       | 491.203092     | 246.105184       | 4  |
| 9  | 1041.430587       | 521.218932        | 1024.404038    | 512.705657       | 1023.420022    | 512.213649       | S    | <b>422.181629</b>  | 211.594452        | 405.155080     | 203.081178       | 404.171064     | 202.589170       | 3  |
| 10 | 1201.461236       | 601.234256        | 1184.434687    | 592.720982       | 1183.450671    | 592.228974       | C    | 335.149601         | 168.078438        | 318.123052     | 159.565164       |                |                  | 2  |
| 11 |                   |                   |                |                  |                |                  | R    | 175.118952         | 88.063114         | 158.092403     | 79.549839        |                |                  | 1  |

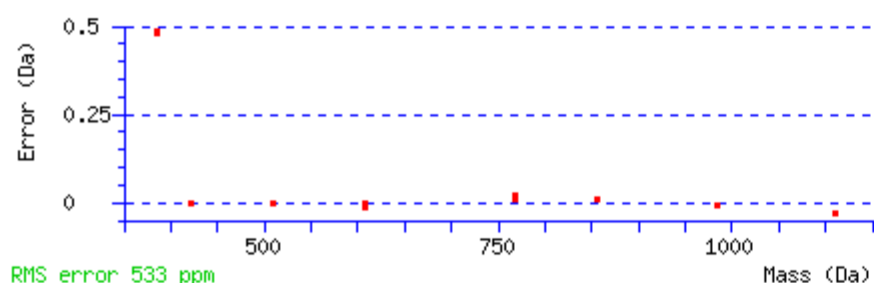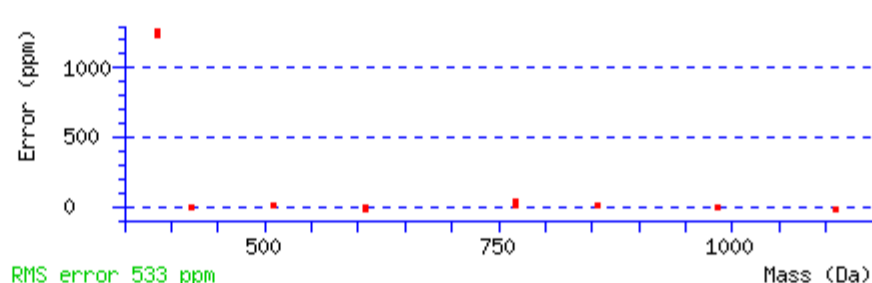

NCBI BLAST search of **TYQQSCVSSCR**

(Parameters: blastp, nr protein database, expect=20000, no filter, PAM30)

Other BLAST [web gateways](#)

All matches to this query

| Score | Mr(calc):   | Delta    | Sequence                    |
|-------|-------------|----------|-----------------------------|
| 52.8  | 1374.565643 | 0.012225 | <a href="#">TYQQSCVSSCR</a> |

Mascot: <http://www.matrixscience.com/>

**Peptide View**

MS/MS Fragmentation of **ISSTLYQAAAPVLTPAK**  
 Found in **KTAP2\_HUMAN**, Keratinocyte-associated protein 2 OS=Homo sapiens GN=KRTCAP2 PE=1 SV=1

Match to Query 42658: 1729.964488 from(865.989520,2+) rtinseconds(2820) index(30370)  
 Title: Locus:1.1.1.2528.21  
 Data file 2011-11-13 - TFD - EP 7-7.mgf

Click mouse within plot area to zoom in by factor of two about that point  
 Or, Plot from  to  Da   
 Label all possible matches  Label matches used for scoring

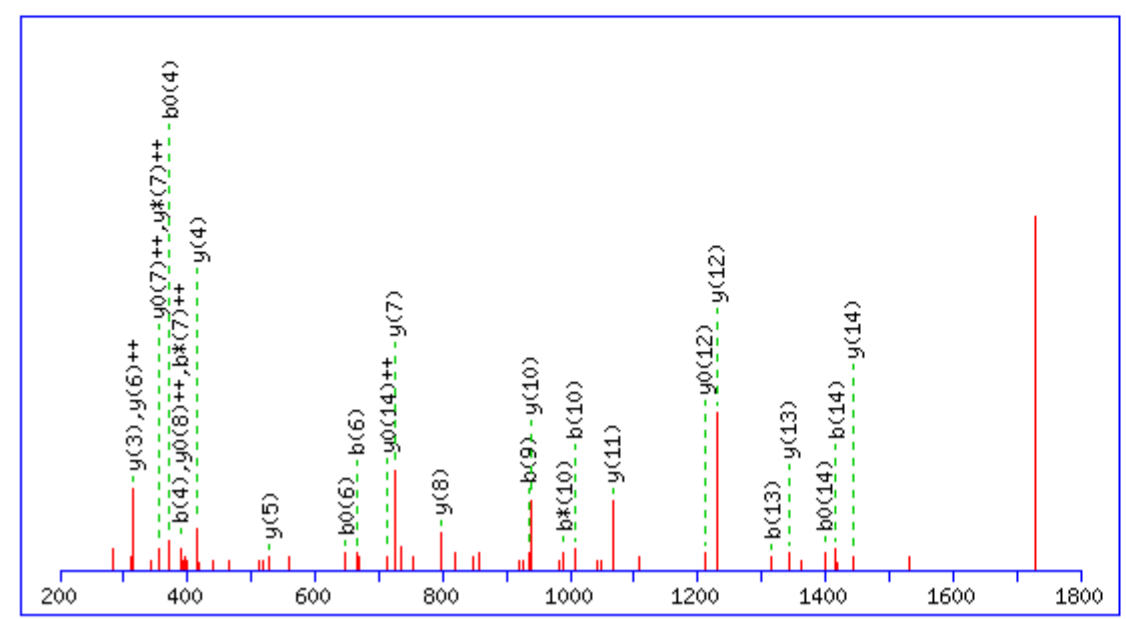

Monoisotopic mass of neutral peptide  $M_r(\text{calc})$ : 1729.961411  
 Fixed modifications: Propionamide (C) (apply to specified residues or termini only)  
 Ions Score: 75 Expect: 1.9e-007  
 Matches : 27/172 fragment ions using 34 most intense peaks ([help](#))

| #  | b                  | b <sup>++</sup> | b <sup>*</sup>    | b <sup>*++</sup>  | b <sup>0</sup>     | b <sup>0++</sup> | Seq. | y                  | y <sup>++</sup>   | y <sup>*</sup> | y <sup>*++</sup>  | y <sup>0</sup>     | y <sup>0++</sup>  | #  |
|----|--------------------|-----------------|-------------------|-------------------|--------------------|------------------|------|--------------------|-------------------|----------------|-------------------|--------------------|-------------------|----|
| 1  | 114.091340         | 57.549308       |                   |                   |                    |                  | I    |                    |                   |                |                   |                    |                   | 17 |
| 2  | 201.123368         | 101.065322      |                   |                   | 183.112803         | 92.060039        | S    | 1617.884651        | 809.445964        | 1600.858102    | 800.932689        | 1599.874086        | 800.440681        | 16 |
| 3  | 288.155396         | 144.581336      |                   |                   | 270.144831         | 135.576053       | S    | 1530.852623        | 765.929950        | 1513.826074    | 757.416675        | 1512.842058        | 756.924667        | 15 |
| 4  | <b>389.203075</b>  | 195.105175      |                   |                   | <b>371.192510</b>  | 186.099893       | T    | <b>1443.820595</b> | 722.413935        | 1426.794046    | 713.900661        | 1425.810030        | <b>713.408653</b> | 14 |
| 5  | 502.287139         | 251.647207      |                   |                   | 484.276574         | 242.641925       | L    | <b>1342.772916</b> | 671.890096        | 1325.746367    | 663.376822        | 1324.762351        | 662.884814        | 13 |
| 6  | <b>665.350468</b>  | 333.178872      |                   |                   | <b>647.339903</b>  | 324.173590       | Y    | <b>1229.688852</b> | 615.348064        | 1212.662303    | 606.834790        | <b>1211.678287</b> | 606.342782        | 12 |
| 7  | 793.409046         | 397.208161      | 776.382497        | <b>388.694887</b> | 775.398481         | 388.202879       | Q    | <b>1066.625523</b> | 533.816399        | 1049.598974    | 525.303125        | 1048.614958        | 524.811117        | 11 |
| 8  | 864.446160         | 432.726718      | 847.419611        | 424.213444        | 846.435595         | 423.721436       | A    | <b>938.566945</b>  | 469.787110        | 921.540396     | 461.273836        | 920.556380         | 460.781828        | 10 |
| 9  | <b>935.483274</b>  | 468.245275      | 918.456725        | 459.732001        | 917.472709         | 459.239993       | A    | 867.529831         | 434.268554        | 850.503282     | 425.755279        | 849.519266         | 425.263271        | 9  |
| 10 | <b>1006.520388</b> | 503.763832      | <b>989.493839</b> | 495.250558        | 988.509823         | 494.758550       | A    | <b>796.492717</b>  | 398.749997        | 779.466168     | 390.236722        | 778.482152         | <b>389.744714</b> | 8  |
| 11 | 1103.573152        | 552.290214      | 1086.546603       | 543.776940        | 1085.562587        | 543.284931       | P    | <b>725.455603</b>  | 363.231440        | 708.429054     | <b>354.718165</b> | 707.445038         | <b>354.226157</b> | 7  |
| 12 | 1202.641566        | 601.824421      | 1185.615017       | 593.311147        | 1184.631001        | 592.819139       | V    | 628.402839         | <b>314.705058</b> | 611.376290     | 306.191783        | 610.392274         | 305.699775        | 6  |
| 13 | <b>1315.725630</b> | 658.366453      | 1298.699081       | 649.853179        | 1297.715065        | 649.361170       | L    | <b>529.334425</b>  | 265.170851        | 512.307876     | 256.657576        | 511.323860         | 256.165568        | 5  |
| 14 | <b>1416.773309</b> | 708.890292      | 1399.746760       | 700.377018        | <b>1398.762744</b> | 699.885010       | T    | <b>416.250361</b>  | 208.628818        | 399.223812     | 200.115544        | 398.239796         | 199.623536        | 4  |
| 15 | 1513.826073        | 757.416675      | 1496.799524       | 748.903400        | 1495.815508        | 748.411392       | P    | <b>315.202682</b>  | 158.104979        | 298.176133     | 149.591704        |                    |                   | 3  |
| 16 | 1584.863187        | 792.935231      | 1567.836638       | 784.421957        | 1566.852622        | 783.929949       | A    | 218.149918         | 109.578597        | 201.123369     | 101.065322        |                    |                   | 2  |
| 17 |                    |                 |                   |                   |                    |                  | K    | 147.112804         | 74.060040         | 130.086255     | 65.546765         |                    |                   | 1  |

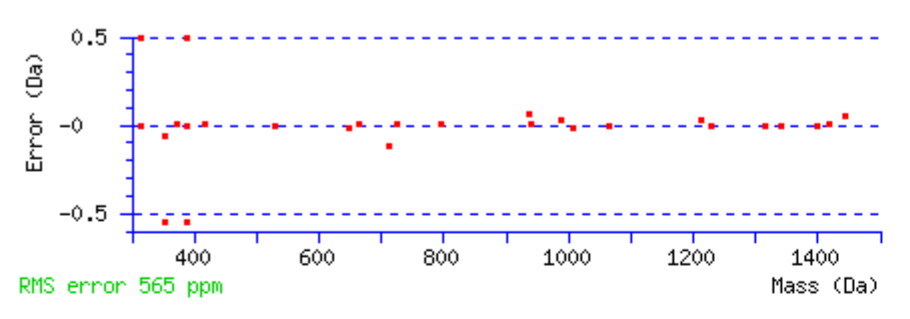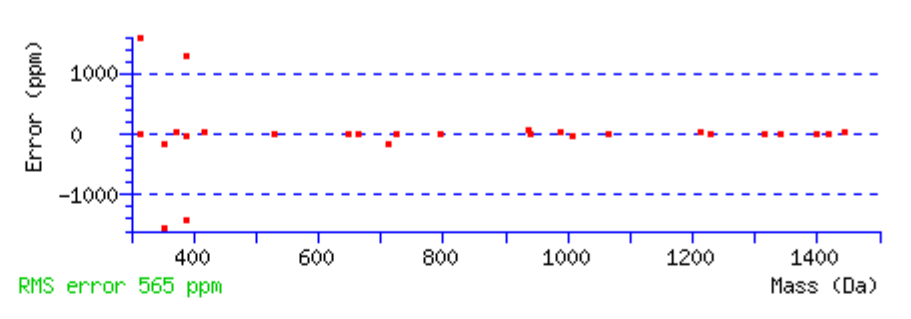

NCBI BLAST search of **ISSTLYQAAAPVLTPAK**  
 (Parameters: blastp, nr protein database, expect=20000, no filter, PAM30)  
 Other BLAST [web gateways](#)

**All matches to this query**

| Score | $M_r(\text{calc})$ : | Delta    | Sequence                 |
|-------|----------------------|----------|--------------------------|
| 74.6  | 1729.961411          | 0.003077 | <b>ISSTLYQAAAPVLTPAK</b> |

# MASCOT Search Results

## Peptide View

MS/MS Fragmentation of **ILGPQGNTIK**

Found in **KHDR1\_HUMAN**, KH domain-containing, RNA-binding, signal transduction-associated protein 1 OS=Homo sapiens GN=KHDRBS1 PE=1 SV=1

Match to Query 12357: 1039.599728 from(520.807140,2+) rtinseconds(1307) index(9443)

Title: Locus:1.1.1.944.23

Data file 2012-01-27 - TFD - Epitel - IEC - 10ul - 3.mgf

Click mouse within plot area to zoom in by factor of two about that point

Or, Plot from  to  Da

Label all possible matches  Label matches used for scoring

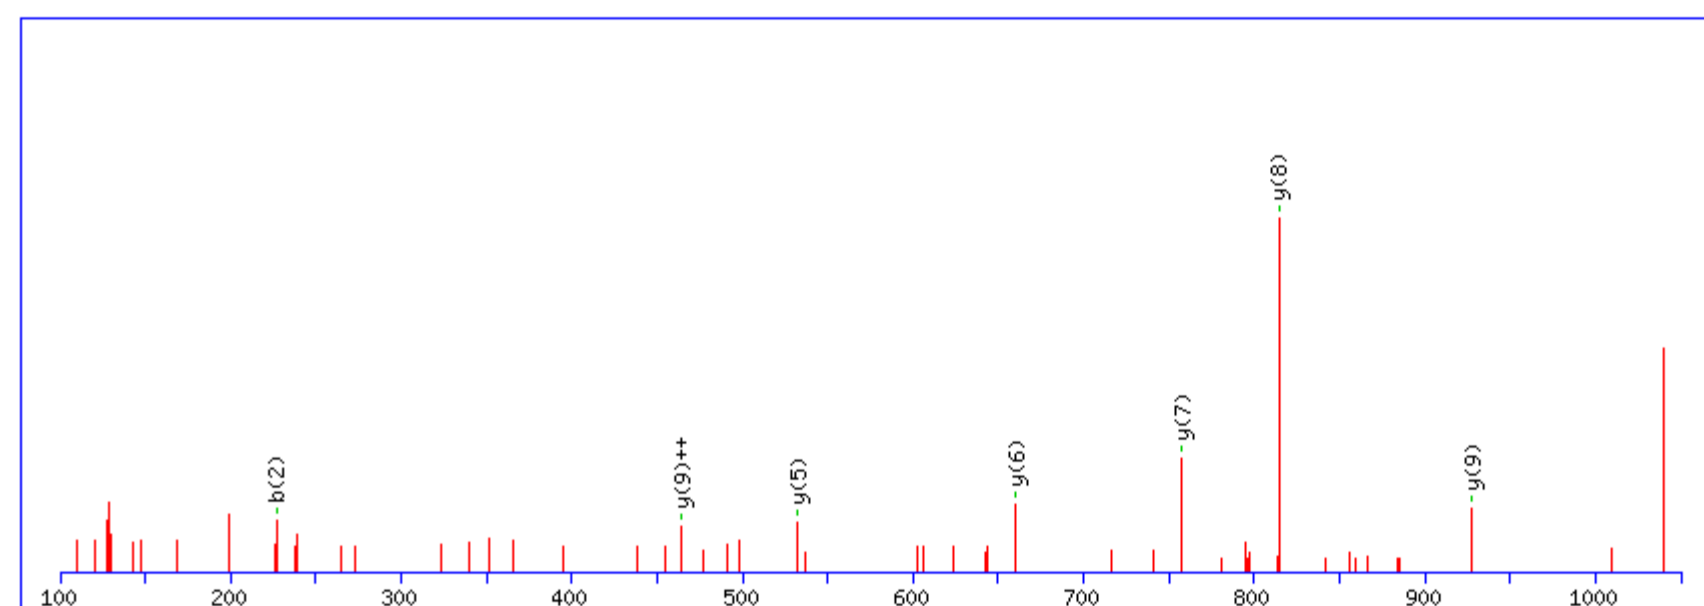

Monoisotopic mass of neutral peptide Mr(calc): 1039.602585

Fixed modifications: Carbamidomethyl (C) (apply to specified residues or termini only)

Ions Score: 33 Expect: 0.0029

Matches : 7/82 fragment ions using 9 most intense peaks ([help](#))

| #  | b          | b <sup>++</sup> | b <sup>*</sup> | b <sup>*++</sup> | b <sup>0</sup> | b <sup>0++</sup> | Seq. | y          | y <sup>++</sup> | y <sup>*</sup> | y <sup>*++</sup> | y <sup>0</sup> | y <sup>0++</sup> | #  |
|----|------------|-----------------|----------------|------------------|----------------|------------------|------|------------|-----------------|----------------|------------------|----------------|------------------|----|
| 1  | 114.091340 | 57.549308       |                |                  |                |                  | I    |            |                 |                |                  |                |                  | 10 |
| 2  | 227.175404 | 114.091340      |                |                  |                |                  | L    | 927.525808 | 464.266542      | 910.499259     | 455.753268       | 909.515243     | 455.261260       | 9  |
| 3  | 284.196868 | 142.602072      |                |                  |                |                  | G    | 814.441744 | 407.724510      | 797.415195     | 399.211236       | 796.431179     | 398.719228       | 8  |
| 4  | 381.249632 | 191.128454      |                |                  |                |                  | P    | 757.420280 | 379.213778      | 740.393731     | 370.700504       | 739.409715     | 370.208496       | 7  |
| 5  | 509.308210 | 255.157743      | 492.281661     | 246.644468       |                |                  | Q    | 660.367516 | 330.687396      | 643.340967     | 322.174122       | 642.356951     | 321.682114       | 6  |
| 6  | 566.329674 | 283.668475      | 549.303125     | 275.155201       |                |                  | G    | 532.308938 | 266.658107      | 515.282389     | 258.144833       | 514.298373     | 257.652825       | 5  |
| 7  | 680.372601 | 340.689939      | 663.346052     | 332.176664       |                |                  | N    | 475.287474 | 238.147375      | 458.260925     | 229.634100       | 457.276909     | 229.142092       | 4  |
| 8  | 781.420280 | 391.213778      | 764.393731     | 382.700504       | 763.409715     | 382.208496       | T    | 361.244547 | 181.125912      | 344.217998     | 172.612637       | 343.233982     | 172.120629       | 3  |
| 9  | 894.504344 | 447.755810      | 877.477795     | 439.242536       | 876.493779     | 438.750528       | I    | 260.196868 | 130.602072      | 243.170319     | 122.088798       |                |                  | 2  |
| 10 |            |                 |                |                  |                |                  | K    | 147.112804 | 74.060040       | 130.086255     | 65.546765        |                |                  | 1  |

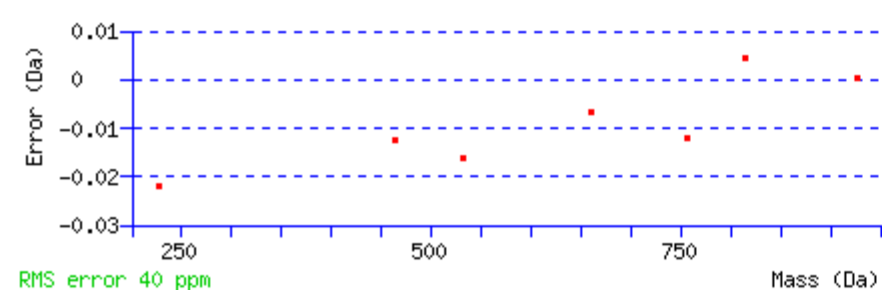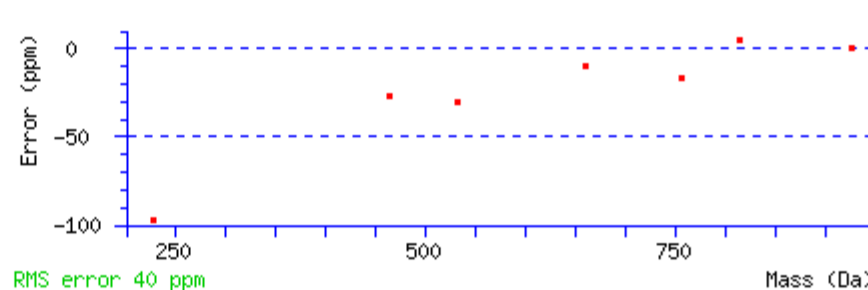

NCBI BLAST search of **ILGPQGNTIK**

(Parameters: blastp, nr protein database, expect=20000, no filter, PAM30)

Other BLAST [web gateways](#)

All matches to this query

| Score | Mr(calc):   | Delta     | Sequence                   |
|-------|-------------|-----------|----------------------------|
| 33.1  | 1039.602585 | -0.002857 | <a href="#">ILGPQGNTIK</a> |
| 9.5   | 1039.602585 | -0.002857 | <a href="#">IINTPEVVR</a>  |
| 7.4   | 1039.591354 | 0.008374  | <a href="#">IIPDPNVIK</a>  |
| 7.4   | 1039.602585 | -0.002857 | <a href="#">IIPTPRSK</a>   |
| 7.4   | 1039.602585 | -0.002857 | <a href="#">IIPTPRSK</a>   |
| 7.4   | 1039.592682 | 0.007046  | <a href="#">PILPSWRR</a>   |
| 7.4   | 1039.602585 | -0.002857 | <a href="#">PINGTLKPGK</a> |
| 0.9   | 1039.602585 | -0.002857 | <a href="#">IIPTPRSK</a>   |
| 0.9   | 1039.591339 | 0.008389  | <a href="#">IPPALISEGK</a> |
| 0.9   | 1039.591339 | 0.008389  | <a href="#">LPPSVAEALK</a> |

# **MASCOT** Mascot Search Results

## Peptide View

MS/MS Fragmentation of **ISLVDLAGSER**

Found in **KIF1A\_HUMAN**, Kinesin-like protein KIF1A OS=Homo sapiens GN=KIF1A PE=2 SV=2

Match to Query 23721: 1158.627588 from(580.321070,2+) rtinseconds(2828) index(34886)

Title: Locus:1.1.1.2627.13

Data file 2011-11-12 - TFD - EP 5-1.mgf

Click mouse within plot area to zoom in by factor of two about that point

Or, Plot from  to  Da

Label all possible matches  Label matches used for scoring

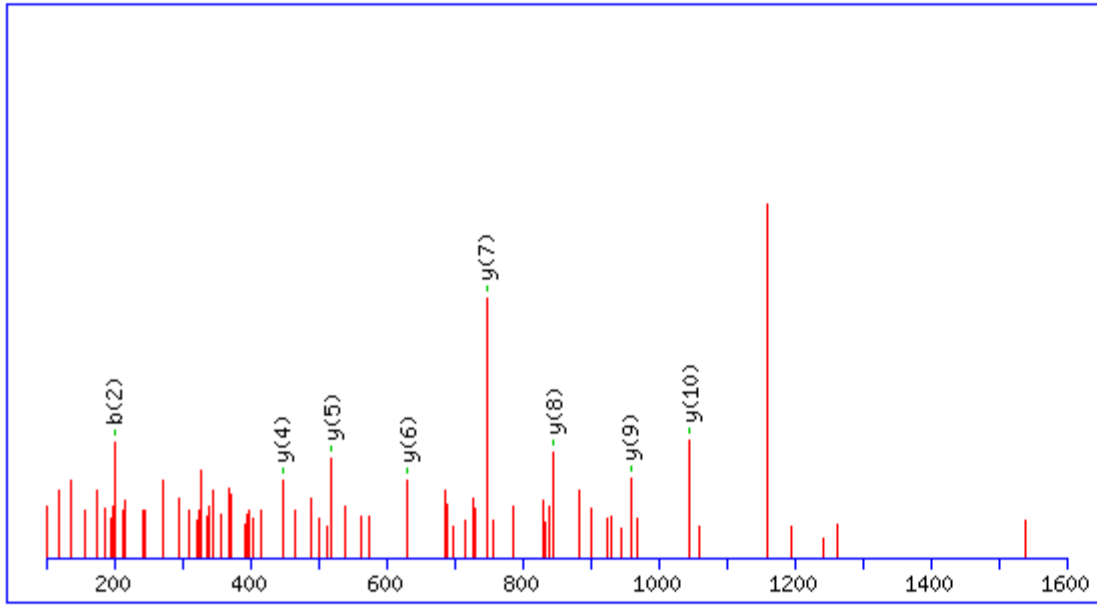

Monoisotopic mass of neutral peptide Mr(calc): 1158.624435

Fixed modifications: Propionamide (C) (apply to specified residues or termini only)

Ions Score: 57 Expect: 5e-005

Matches : 8/96 fragment ions using 10 most intense peaks ([help](#))

| #  | b                 | b <sup>++</sup> | b <sup>0</sup> | b <sup>0++</sup> | Seq. | y                  | y <sup>++</sup> | y <sup>*</sup> | y <sup>*++</sup> | y <sup>0</sup> | y <sup>0++</sup> | #  |
|----|-------------------|-----------------|----------------|------------------|------|--------------------|-----------------|----------------|------------------|----------------|------------------|----|
| 1  | 114.091340        | 57.549308       |                |                  | I    |                    |                 |                |                  |                |                  | 11 |
| 2  | <b>201.123368</b> | 101.065322      | 183.112803     | 92.060039        | S    | <b>1046.547664</b> | 523.777470      | 1029.521115    | 515.264196       | 1028.537099    | 514.772188       | 10 |
| 3  | 314.207432        | 157.607354      | 296.196867     | 148.602071       | L    | <b>959.515636</b>  | 480.261456      | 942.489087     | 471.748182       | 941.505071     | 471.256174       | 9  |
| 4  | 413.275846        | 207.141561      | 395.265281     | 198.136279       | V    | <b>846.431572</b>  | 423.719424      | 829.405023     | 415.206150       | 828.421007     | 414.714142       | 8  |
| 5  | 528.302789        | 264.655033      | 510.292224     | 255.649750       | D    | <b>747.363158</b>  | 374.185217      | 730.336609     | 365.671943       | 729.352593     | 365.179935       | 7  |
| 6  | 641.386853        | 321.197065      | 623.376288     | 312.191782       | L    | <b>632.336215</b>  | 316.671746      | 615.309666     | 308.158471       | 614.325650     | 307.666463       | 6  |
| 7  | 712.423967        | 356.715622      | 694.413402     | 347.710339       | A    | <b>519.252151</b>  | 260.129714      | 502.225602     | 251.616439       | 501.241586     | 251.124431       | 5  |
| 8  | 769.445431        | 385.226354      | 751.434866     | 376.221071       | G    | <b>448.215037</b>  | 224.611156      | 431.188488     | 216.097882       | 430.204472     | 215.605874       | 4  |
| 9  | 856.477459        | 428.742368      | 838.466894     | 419.737085       | S    | 391.193573         | 196.100424      | 374.167024     | 187.587150       | 373.183008     | 187.095142       | 3  |
| 10 | 985.520052        | 493.263664      | 967.509487     | 484.258382       | E    | 304.161545         | 152.584410      | 287.134996     | 144.071136       | 286.150980     | 143.579128       | 2  |
| 11 |                   |                 |                |                  | R    | 175.118952         | 88.063114       | 158.092403     | 79.549839        |                |                  | 1  |

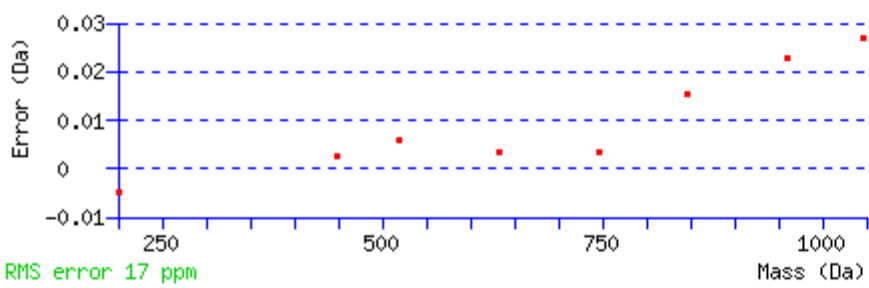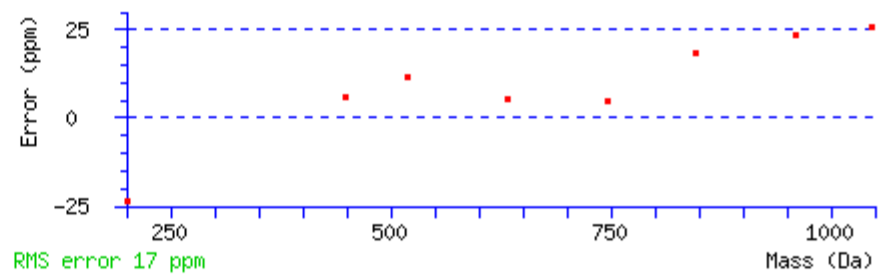

NCBI BLAST search of **ISLVDLAGSER**

(Parameters: blastp, nr protein database, expect=20000, no filter, PAM30)

Other BLAST [web gateways](#)

## All matches to this query

| Score | Mr(calc):   | Delta     | Sequence                    |
|-------|-------------|-----------|-----------------------------|
| 57.1  | 1158.624435 | 0.003153  | <a href="#">ISLVDLAGSER</a> |
| 57.1  | 1158.624435 | 0.003153  | <a href="#">LSLVDLAGSER</a> |
| 11.8  | 1158.624420 | 0.003168  | <a href="#">LSAQKDLEQK</a>  |
| 5.8   | 1158.617905 | 0.009683  | <a href="#">LAELTGRPMR</a>  |
| 5.8   | 1158.617905 | 0.009683  | <a href="#">LAELTGRPMR</a>  |
| 3.7   | 1158.624435 | 0.003153  | <a href="#">TVPLTAKEER</a>  |
| 3.4   | 1158.635666 | -0.008078 | <a href="#">LSEKTQQAVR</a>  |
| 2.6   | 1158.624435 | 0.003153  | <a href="#">LTVDGLEKER</a>  |
| 2.6   | 1158.635681 | -0.008093 | <a href="#">VTGSVSININR</a> |
| 2.4   | 1158.635681 | -0.008093 | <a href="#">AVTEVREVTR</a>  |

# MASCOT Search Results

## Peptide View

MS/MS Fragmentation of **RQQQGQLQR**

Found in **KIF7\_HUMAN**, Kinesin-like protein KIF7 OS=Homo sapiens GN=KIF7 PE=1 SV=2

Match to Query 449027: 1140.622408 from(571.318480,2+) rtinseconds(3246) index(617584)

Title: Locus:1.1.1.1561.17

Data file C:\Program Files (x86)\Matrix Science\Mascot Daemon\mgf3 TFD - Epitel - R2\mascot\_daemon\_merge.mgf

Click mouse within plot area to zoom in by factor of two about that point

Or, Plot from  to  Da

Label all possible matches  Label matches used for scoring

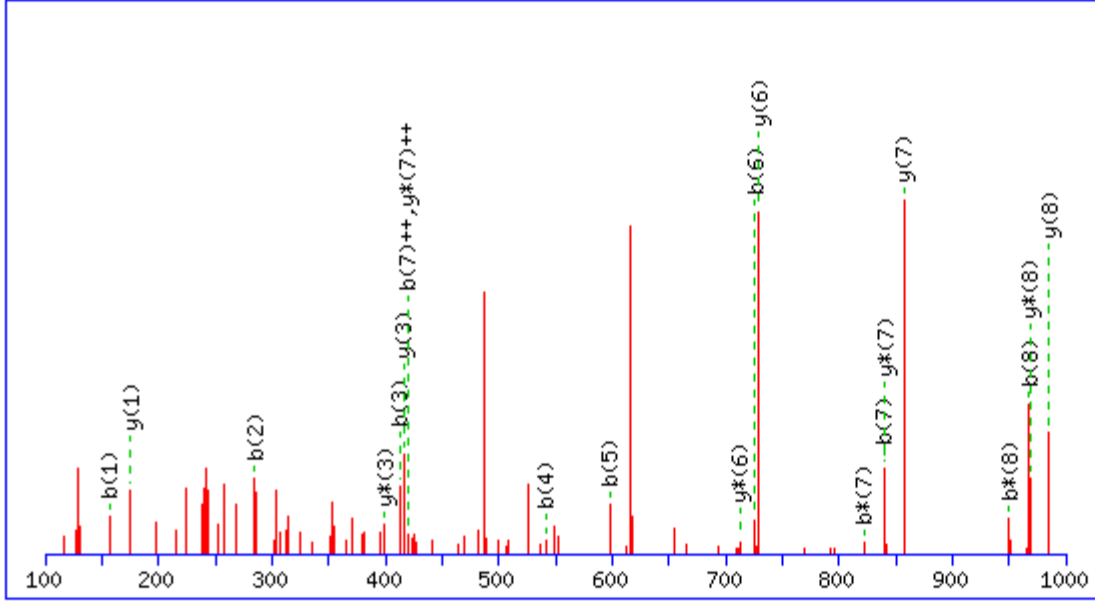

Monoisotopic mass of neutral peptide Mr(calc): 1140.611191

Fixed modifications: Carbamidomethyl (C) (apply to specified residues or termini only)

Ions Score: 44 Expect: 0.00047

Matches : 21/64 fragment ions using 45 most intense peaks ([help](#))

| # | b          | b <sup>++</sup> | b <sup>*</sup> | b <sup>*++</sup> | Seq. | y          | y <sup>++</sup> | y <sup>*</sup> | y <sup>*++</sup> | # |
|---|------------|-----------------|----------------|------------------|------|------------|-----------------|----------------|------------------|---|
| 1 | 157.108387 | 79.057831       | 140.081838     | 70.544557        | R    |            |                 |                |                  | 9 |
| 2 | 285.166965 | 143.087121      | 268.140416     | 134.573846       | Q    | 985.517370 | 493.262323      | 968.490821     | 484.749049       | 8 |
| 3 | 413.225543 | 207.116410      | 396.198994     | 198.603135       | Q    | 857.458792 | 429.233034      | 840.432243     | 420.719760       | 7 |
| 4 | 541.284121 | 271.145699      | 524.257572     | 262.632424       | Q    | 729.400214 | 365.203745      | 712.373665     | 356.690471       | 6 |
| 5 | 598.305585 | 299.656431      | 581.279036     | 291.143156       | G    | 601.341636 | 301.174456      | 584.315087     | 292.661182       | 5 |
| 6 | 726.364163 | 363.685720      | 709.337614     | 355.172445       | Q    | 544.320172 | 272.663724      | 527.293623     | 264.150450       | 4 |
| 7 | 839.448227 | 420.227752      | 822.421678     | 411.714477       | L    | 416.261594 | 208.634435      | 399.235045     | 200.121160       | 3 |
| 8 | 967.506805 | 484.257041      | 950.480256     | 475.743766       | Q    | 303.177530 | 152.092403      | 286.150981     | 143.579128       | 2 |
| 9 |            |                 |                |                  | R    | 175.118952 | 88.063114       | 158.092403     | 79.549839        | 1 |

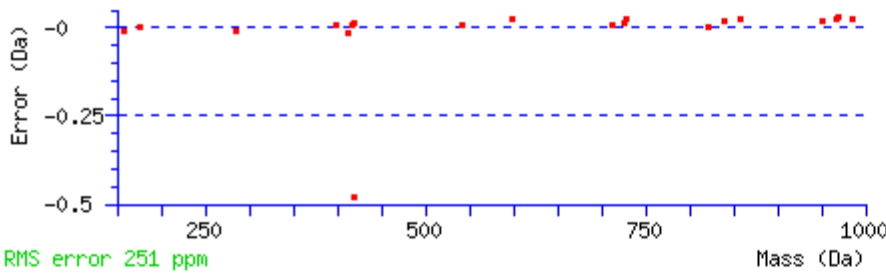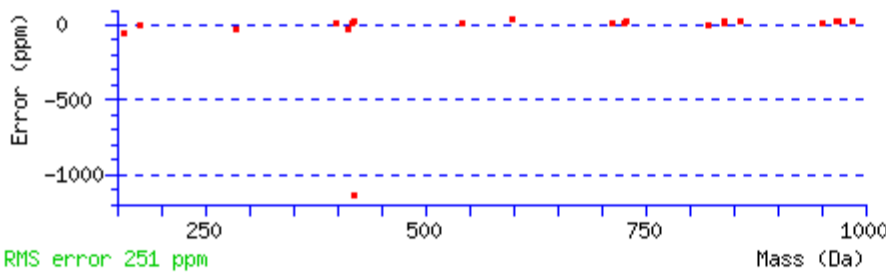

NCBI BLAST search of [RQQQGQLQR](#)

(Parameters: blastp, nr protein database, expect=20000, no filter, PAM30)

Other BLAST [web gateways](#)

## All matches to this query

| Score | Mr(calc):   | Delta     | Sequence                   |
|-------|-------------|-----------|----------------------------|
| 44.1  | 1140.611191 | 0.011217  | <a href="#">RQQQGQLQR</a>  |
| 33.1  | 1140.625107 | -0.002699 | <a href="#">KIQVEQPQR</a>  |
| 16.9  | 1140.615219 | 0.007189  | <a href="#">DVARHFIQR</a>  |
| 12.4  | 1140.613861 | 0.008547  | <a href="#">DLPALQEALR</a> |
| 12.4  | 1140.613861 | 0.008547  | <a href="#">ELGPEAKR</a>   |
| 11.8  | 1140.611191 | 0.011217  | <a href="#">RPRTQAPGSR</a> |
| 10.4  | 1140.625092 | -0.002684 | <a href="#">KPEKNLQPR</a>  |
| 9.3   | 1140.611191 | 0.011217  | <a href="#">RPGDGARLQR</a> |
| 8.6   | 1140.625122 | -0.002714 | <a href="#">QPLVSQQLR</a>  |
| 8.0   | 1140.613876 | 0.008532  | <a href="#">VGKIPDEEVR</a> |



# MASCOT Search Results

## Peptide View

MS/MS Fragmentation of **QVELQEERR**

Found in **KIFC1\_HUMAN**, Kinesin-like protein KIFC1 OS=Homo sapiens GN=KIFC1 PE=1 SV=2

Match to Query 22567: 1185.618328 from(593.816440,2+) rtinseconds(4112) index(62280)

Title: Locus:1.1.1.2001.10

Data file 2012-01-27 - TFD - Epitel - IEC - 10ul - 3.mgf

Click mouse within plot area to zoom in by factor of two about that point

Or, Plot from  to  Da

Label all possible matches  Label matches used for scoring

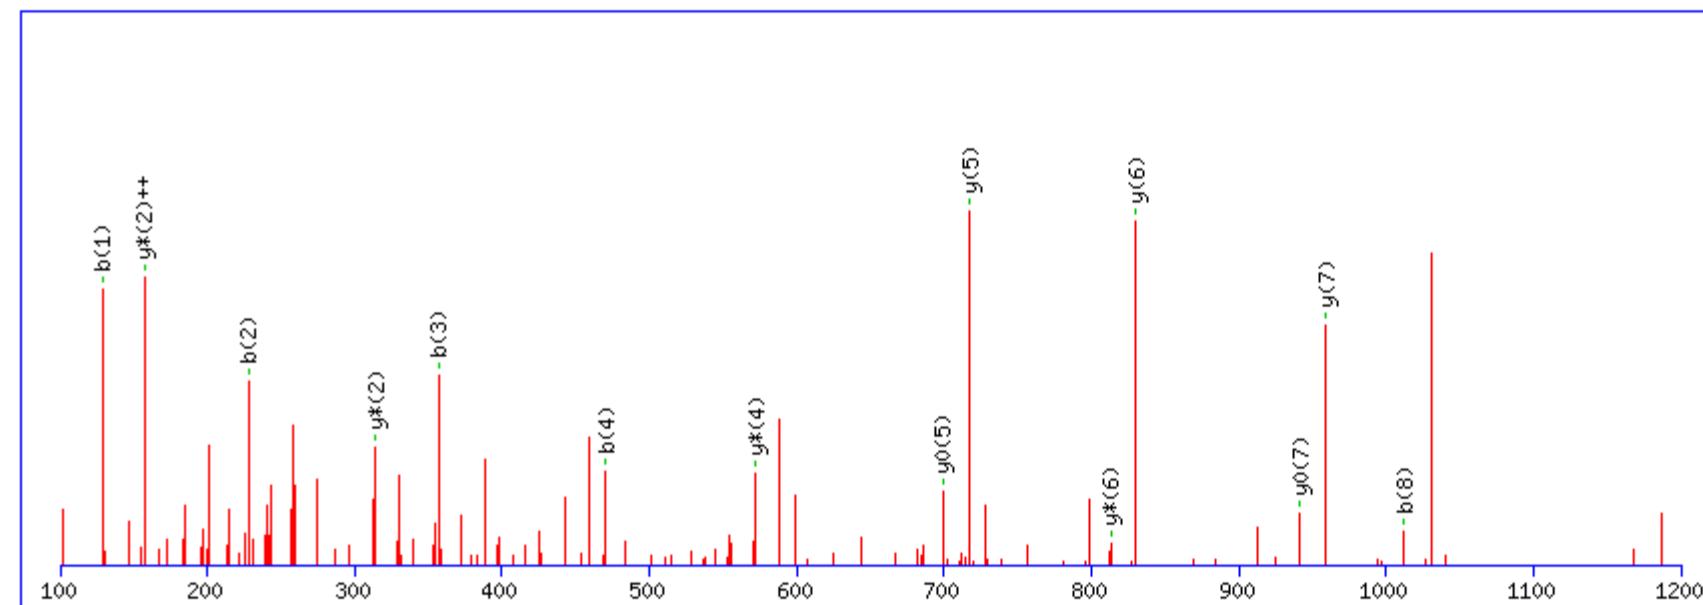

Monoisotopic mass of neutral peptide Mr(calc): 1185.610168

Fixed modifications: Carbamidomethyl (C) (apply to specified residues or termini only)

Ions Score: 33 Expect: 0.0091

Matches : 14/88 fragment ions using 21 most intense peaks [\(help\)](#)

| # | b                  | b <sup>++</sup> | b <sup>*</sup> | b <sup>*++</sup> | b <sup>0</sup> | b <sup>0++</sup> | Seq. | y                 | y <sup>++</sup> | y <sup>*</sup>    | y <sup>*++</sup>  | y <sup>0</sup>    | y <sup>0++</sup> | # |
|---|--------------------|-----------------|----------------|------------------|----------------|------------------|------|-------------------|-----------------|-------------------|-------------------|-------------------|------------------|---|
| 1 | <b>129.065854</b>  | 65.036565       | 112.039305     | 56.523291        |                |                  | Q    |                   |                 |                   |                   |                   |                  | 9 |
| 2 | <b>228.134268</b>  | 114.570772      | 211.107719     | 106.057498       |                |                  | V    | 1058.558898       | 529.783087      | 1041.532349       | 521.269813        | 1040.548333       | 520.777805       | 8 |
| 3 | <b>357.176861</b>  | 179.092069      | 340.150312     | 170.578794       | 339.166296     | 170.086786       | E    | <b>959.490484</b> | 480.248880      | 942.463935        | 471.735606        | <b>941.479919</b> | 471.243598       | 7 |
| 4 | <b>470.260925</b>  | 235.634101      | 453.234376     | 227.120826       | 452.250360     | 226.628818       | L    | <b>830.447891</b> | 415.727584      | <b>813.421342</b> | 407.214309        | 812.437326        | 406.722301       | 6 |
| 5 | 598.319503         | 299.663390      | 581.292954     | 291.150115       | 580.308938     | 290.658107       | Q    | <b>717.363827</b> | 359.185552      | 700.337278        | 350.672277        | <b>699.353262</b> | 350.180269       | 5 |
| 6 | 727.362096         | 364.184686      | 710.335547     | 355.671412       | 709.351531     | 355.179404       | E    | 589.305249        | 295.156263      | <b>572.278700</b> | 286.642988        | 571.294684        | 286.150980       | 4 |
| 7 | 856.404689         | 428.705983      | 839.378140     | 420.192708       | 838.394124     | 419.700700       | E    | 460.262656        | 230.634966      | 443.236107        | 222.121691        | 442.252091        | 221.629683       | 3 |
| 8 | <b>1012.505800</b> | 506.756538      | 995.479251     | 498.243264       | 994.495235     | 497.751256       | R    | 331.220063        | 166.113669      | <b>314.193514</b> | <b>157.600395</b> |                   |                  | 2 |
| 9 |                    |                 |                |                  |                |                  | R    | 175.118952        | 88.063114       | 158.092403        | 79.549839         |                   |                  | 1 |

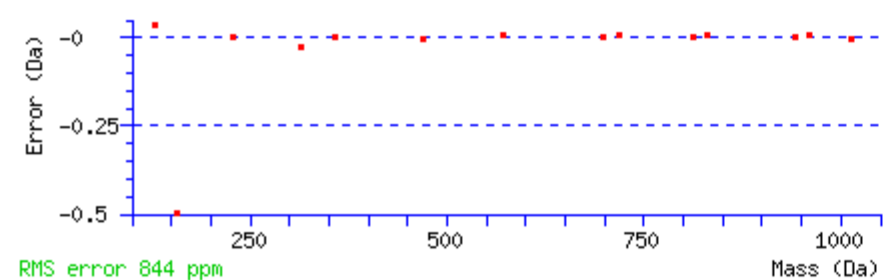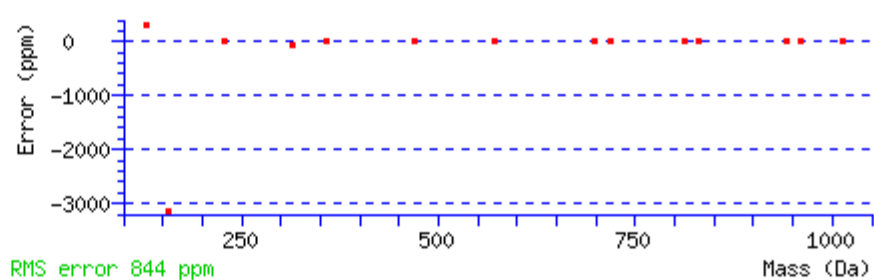

NCBI BLAST search of **QVELQEERR**

(Parameters: blastp, nr protein database, expect=20000, no filter, PAM30)

Other BLAST [web gateways](#)

## All matches to this query

| Score | Mr(calc):   | Delta     | Sequence                    |
|-------|-------------|-----------|-----------------------------|
| 32.5  | 1185.610168 | 0.008160  | <a href="#">QVELQEERR</a>   |
| 26.1  | 1185.610184 | 0.008144  | <a href="#">VQELQQQSAR</a>  |
| 25.5  | 1185.625443 | -0.007115 | <a href="#">RTVPWLENR</a>   |
| 22.5  | 1185.610153 | 0.008175  | <a href="#">RAEENALQK</a>   |
| 18.5  | 1185.614212 | 0.004116  | <a href="#">QVIEELGGWR</a>  |
| 17.3  | 1185.610168 | 0.008160  | <a href="#">AESGNPSIRQK</a> |
| 16.5  | 1185.625427 | -0.007099 | <a href="#">RALEWLGADR</a>  |
| 15.5  | 1185.628815 | -0.010487 | <a href="#">RLSPPACTLR</a>  |
| 14.0  | 1185.624100 | -0.005772 | <a href="#">KDGSSPPLLEK</a> |
| 10.9  | 1185.612839 | 0.005489  | <a href="#">AEEELLPLEK</a>  |

# MASCOT Search Results

## Peptide View

MS/MS Fragmentation of **MAKFALNQNLPLDGGPR**

Found in **KANK3\_HUMAN**, KN motif and ankyrin repeat domain-containing protein 3 OS=Homo sapiens GN=KANK3 PE=2 SV=1

Match to Query 61245: 1872.943768 from(937.479160,2+) rtinseconds(4847) index(71802)

Title: Locus:1.1.1.3125.20

Data file 2011-11-12 - TFD - EP 6-4.mgf

Click mouse within plot area to zoom in by factor of two about that point

Or, Plot from 100 to 1900 Da Full range

Label all possible matches  Label matches used for scoring

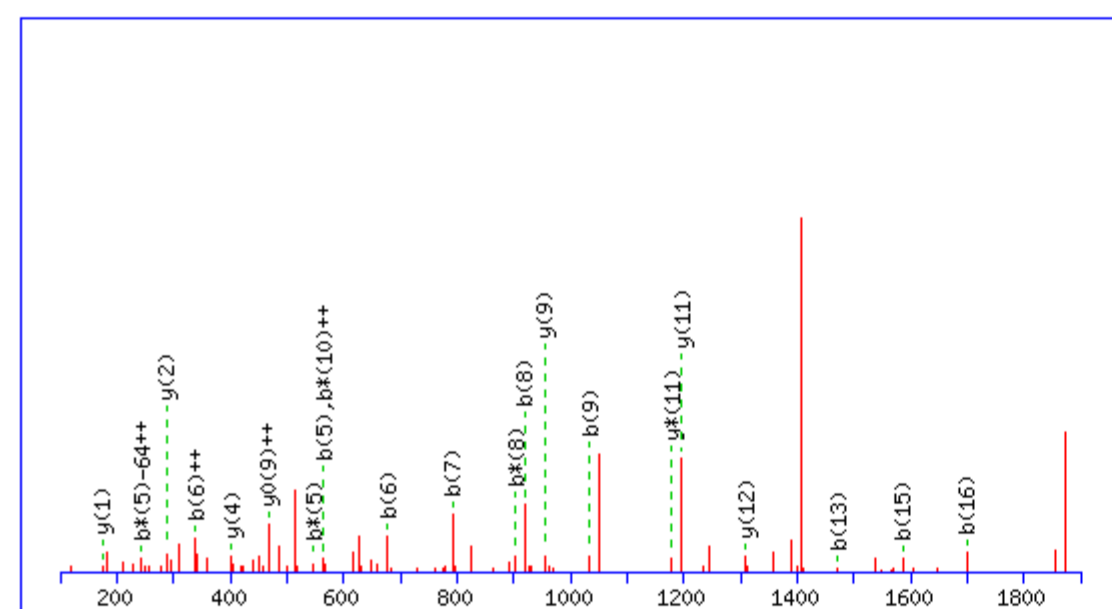

Monoisotopic mass of neutral peptide Mr(calc): 1872.951599

Fixed modifications: Propionamide (C) (apply to specified residues or termini only)

Variable modifications:

M1 : Oxidation (M), with neutral losses 0.000000 (shown in table), 63.998285

P16 : Oxidation (P)

Ions Score: 32 Expect: 0.0062

Matches : 21/226 fragment ions using 45 most intense peaks [\(help\)](#)

| #  | b                  | b <sup>++</sup>   | b <sup>+</sup>    | b <sup>+++</sup>  | b <sup>0</sup> | b <sup>0++</sup> | Seq. | y                  | y <sup>++</sup> | y <sup>+</sup>     | y <sup>+++</sup> | y <sup>0</sup> | y <sup>0++</sup>  | #  |
|----|--------------------|-------------------|-------------------|-------------------|----------------|------------------|------|--------------------|-----------------|--------------------|------------------|----------------|-------------------|----|
| 1  | 148.042676         | 74.524976         |                   |                   |                |                  | M    |                    |                 |                    |                  |                |                   | 17 |
| 2  | 219.079790         | 110.043533        |                   |                   |                |                  | A    | 1726.923495        | 863.965385      | 1709.896946        | 855.452111       | 1708.912930    | 854.960103        | 16 |
| 3  | 347.174753         | 174.091014        | 330.148204        | 165.577740        |                |                  | K    | 1655.886381        | 828.446828      | 1638.859832        | 819.933554       | 1637.875816    | 819.441546        | 15 |
| 4  | 494.243167         | 247.625221        | 477.216618        | 239.111947        |                |                  | F    | 1527.791418        | 764.399347      | 1510.764869        | 755.886072       | 1509.780853    | 755.394064        | 14 |
| 5  | <b>565.280281</b>  | 283.143779        | <b>548.253732</b> | 274.630504        |                |                  | A    | 1380.723004        | 690.865140      | 1363.696455        | 682.351865       | 1362.712439    | 681.859857        | 13 |
| 6  | <b>678.364345</b>  | <b>339.685811</b> | 661.337796        | 331.172536        |                |                  | L    | <b>1309.685890</b> | 655.346583      | 1292.659341        | 646.833309       | 1291.675325    | 646.341300        | 12 |
| 7  | <b>792.407272</b>  | 396.707274        | 775.380723        | 388.193999        |                |                  | N    | <b>1196.601826</b> | 598.804551      | <b>1179.575277</b> | 590.291276       | 1178.591261    | 589.799268        | 11 |
| 8  | <b>920.465850</b>  | 460.736563        | <b>903.439301</b> | 452.223288        |                |                  | Q    | 1082.558899        | 541.783087      | 1065.532350        | 533.269813       | 1064.548334    | 532.777805        | 10 |
| 9  | <b>1034.508777</b> | 517.758027        | 1017.482228       | 509.244752        |                |                  | N    | <b>954.500321</b>  | 477.753798      | 937.473772         | 469.240524       | 936.489756     | <b>468.748516</b> | 9  |
| 10 | 1147.592841        | 574.300058        | 1130.566292       | <b>565.786784</b> |                |                  | L    | 840.457394         | 420.732335      | 823.430845         | 412.219060       | 822.446829     | 411.727052        | 8  |
| 11 | 1244.645605        | 622.826440        | 1227.619056       | 614.313166        |                |                  | P    | 727.373330         | 364.190303      | 710.346781         | 355.677028       | 709.362765     | 355.185020        | 7  |
| 12 | 1359.672548        | 680.339912        | 1342.645999       | 671.826638        | 1341.661983    | 671.334630       | D    | 630.320566         | 315.663921      | 613.294017         | 307.150646       | 612.310001     | 306.658638        | 6  |
| 13 | <b>1472.756612</b> | 736.881944        | 1455.730063       | 728.368670        | 1454.746047    | 727.876661       | L    | 515.293623         | 258.150449      | 498.267074         | 249.637175       |                |                   | 5  |
| 14 | 1529.778076        | 765.392676        | 1512.751527       | 756.879401        | 1511.767511    | 756.387393       | G    | <b>402.209559</b>  | 201.608417      | 385.183010         | 193.095143       |                |                   | 4  |
| 15 | <b>1586.799540</b> | 793.903408        | 1569.772991       | 785.390133        | 1568.788975    | 784.898125       | G    | 345.188095         | 173.097685      | 328.161546         | 164.584411       |                |                   | 3  |
| 16 | <b>1699.847219</b> | 850.427247        | 1682.820670       | 841.913973        | 1681.836654    | 841.421965       | P    | <b>288.166631</b>  | 144.586953      | 271.140082         | 136.073679       |                |                   | 2  |
| 17 |                    |                   |                   |                   |                |                  | R    | <b>175.118952</b>  | 88.063114       | 158.092403         | 79.549839        |                |                   | 1  |

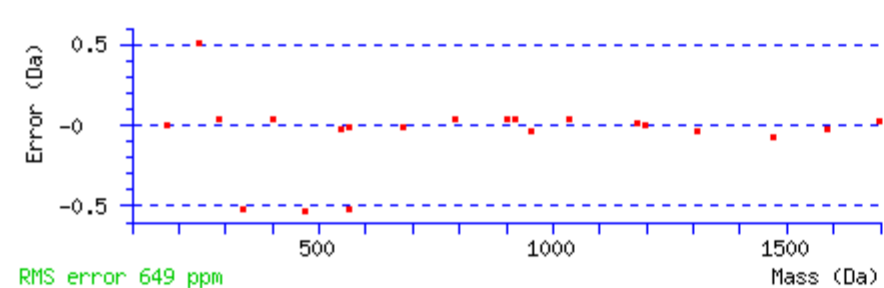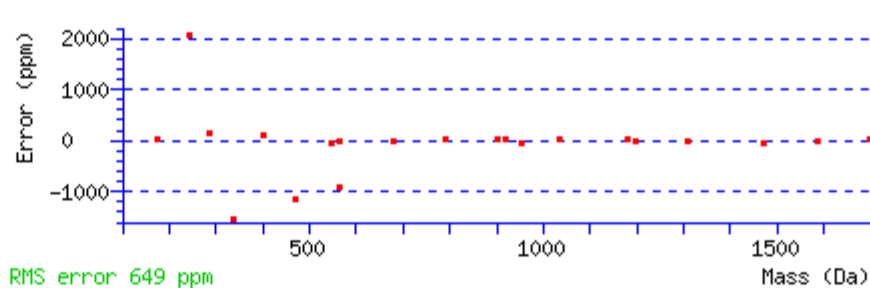

NCBI BLAST search of [MAKFALNQNLPLDGGPR](#)

(Parameters: blastp, nr protein database, expect=20000, no filter, PAM30)

Other BLAST [web gateways](#)

All matches to this query

| Score | Mr(calc):   | Delta     | Sequence                           |
|-------|-------------|-----------|------------------------------------|
| 32.1  | 1872.951599 | -0.007831 | <a href="#">MAKFALNQNLPLDGGPR</a>  |
| 15.4  | 1872.951599 | -0.007831 | <a href="#">MAKFALNQNLPLDGGPR</a>  |
| 8.2   | 1872.937012 | 0.006756  | <a href="#">LPLPGPYDSRDDFPLR</a>   |
| 8.1   | 1872.937195 | 0.006573  | <a href="#">SPQECCLRVSLMPLR</a>    |
| 5.6   | 1872.946915 | -0.003147 | <a href="#">SSPGPDTLVVLEFNPASK</a> |
| 4.8   | 1872.930466 | 0.013302  | <a href="#">HIQWTPREMEVYIR</a>     |
| 2.7   | 1872.951630 | -0.007862 | <a href="#">KVKPHPPPSGLPPCPR</a>   |
| 2.6   | 1872.925110 | 0.018658  | <a href="#">SSIMSITAEPGNDIVR</a>   |
| 2.4   | 1872.946915 | -0.003147 | <a href="#">SSPGPDTLVVLEFNPASK</a> |
| 2.3   | 1872.951630 | -0.007862 | <a href="#">KVKPHPPPSGLPPCPR</a>   |

# Mascot Search Results

## Peptide View

MS/MS Fragmentation of **YTSGFDELQR**

Found in **SPIT1\_HUMAN**, Kunitz-type protease inhibitor 1 OS=Homo sapiens GN=SPINT1 PE=1 SV=2

Match to Query 538090: 1214.552188 from(608.283370,2+) rtinseconds(2072) index(837646)

Title: Locus:1.1.1.1335.19

Data file C:\Program Files (x86)\Matrix Science\Mascot Daemon\mgf3 TFD - Epitel - R2\mascot\_daemon\_merge.mgf

Click mouse within plot area to zoom in by factor of two about that point

Or, Plot from  to  Da

Label all possible matches  Label matches used for scoring

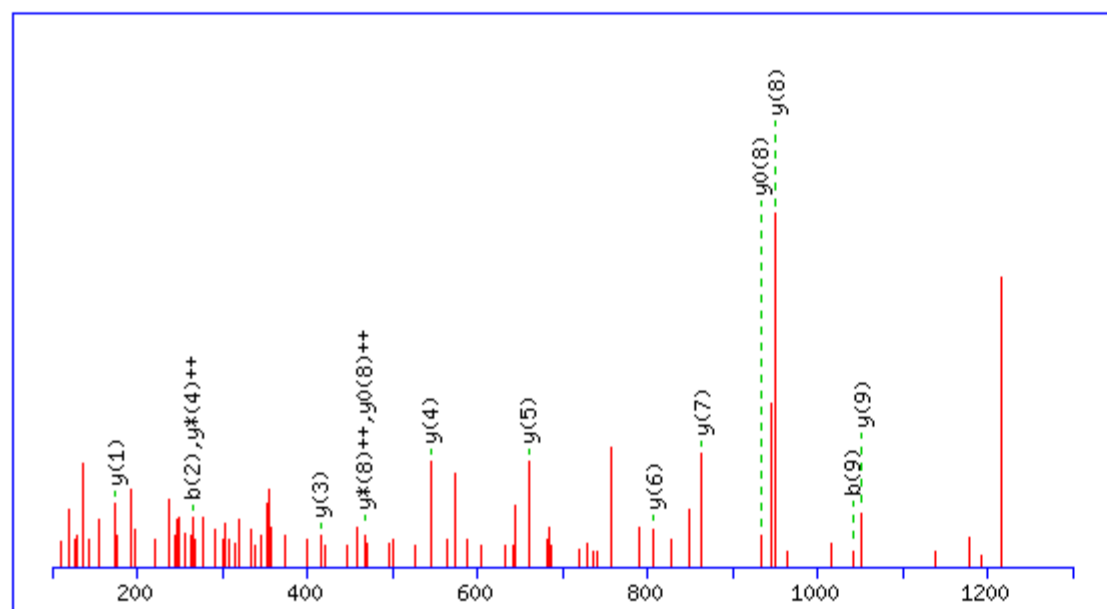

Monoisotopic mass of neutral peptide Mr(calc): 1214.556763

Fixed modifications: Carbamidomethyl (C) (apply to specified residues or termini only)

Ions Score: 42 Expect: 0.00026

Matches : 14/84 fragment ions using 33 most intense peaks ([help](#))

| #  | b                  | b <sup>++</sup> | b <sup>*</sup> | b <sup>*++</sup> | b <sup>0</sup> | b <sup>0++</sup> | Seq. | y                  | y <sup>++</sup> | y <sup>*</sup> | y <sup>*++</sup>  | y <sup>0</sup>    | y <sup>0++</sup>  | #  |
|----|--------------------|-----------------|----------------|------------------|----------------|------------------|------|--------------------|-----------------|----------------|-------------------|-------------------|-------------------|----|
| 1  | 164.070605         | 82.538940       |                |                  |                |                  | Y    |                    |                 |                |                   |                   |                   | 10 |
| 2  | <b>265.118284</b>  | 133.062780      |                |                  | 247.107719     | 124.057498       | T    | <b>1052.500715</b> | 526.753995      | 1035.474166    | 518.240721        | 1034.490150       | 517.748713        | 9  |
| 3  | 352.150312         | 176.578794      |                |                  | 334.139747     | 167.573512       | S    | <b>951.453036</b>  | 476.230156      | 934.426487     | <b>467.716881</b> | <b>933.442471</b> | <b>467.224873</b> | 8  |
| 4  | 409.171776         | 205.089526      |                |                  | 391.161211     | 196.084244       | G    | <b>864.421008</b>  | 432.714142      | 847.394459     | 424.200867        | 846.410443        | 423.708859        | 7  |
| 5  | 556.240190         | 278.623733      |                |                  | 538.229625     | 269.618451       | F    | <b>807.399544</b>  | 404.203410      | 790.372995     | 395.690135        | 789.388979        | 395.198127        | 6  |
| 6  | 671.267133         | 336.137205      |                |                  | 653.256568     | 327.131922       | D    | <b>660.331130</b>  | 330.669203      | 643.304581     | 322.155928        | 642.320565        | 321.663920        | 5  |
| 7  | 800.309726         | 400.658501      |                |                  | 782.299161     | 391.653219       | E    | <b>545.304187</b>  | 273.155732      | 528.277638     | <b>264.642457</b> | 527.293622        | 264.150449        | 4  |
| 8  | 913.393790         | 457.200533      |                |                  | 895.383225     | 448.195251       | L    | <b>416.261594</b>  | 208.634435      | 399.235045     | 200.121160        |                   |                   | 3  |
| 9  | <b>1041.452368</b> | 521.229822      | 1024.425819    | 512.716548       | 1023.441803    | 512.224539       | Q    | 303.177530         | 152.092403      | 286.150981     | 143.579128        |                   |                   | 2  |
| 10 |                    |                 |                |                  |                |                  | R    | <b>175.118952</b>  | 88.063114       | 158.092403     | 79.549839         |                   |                   | 1  |

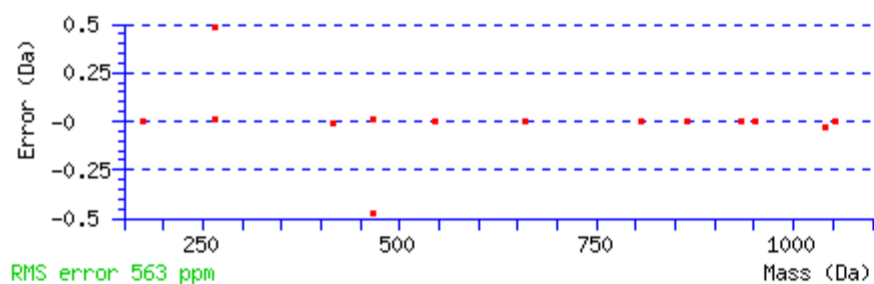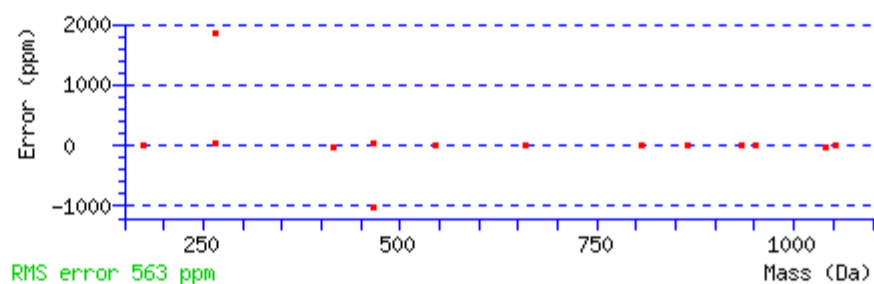

NCBI BLAST search of [YTSGFDELQR](#)

(Parameters: blastp, nr protein database, expect=20000, no filter, PAM30)

Other BLAST [web gateways](#)

All matches to this query

| Score | Mr(calc):   | Delta     | Sequence                   |
|-------|-------------|-----------|----------------------------|
| 41.6  | 1214.556763 | -0.004575 | <a href="#">YTSGFDELQR</a> |

Mascot: <http://www.matrixscience.com/>

**Mascot Search Results**

**Peptide View**

MS/MS Fragmentation of **GGVDTAAAPAGGAPPAHAPGPGR**  
 Found in **LAGE3\_HUMAN**, L antigen family member 3 OS=Homo sapiens GN=LAGE3 PE=1 SV=2

Match to Query 57052: 1950.957372 from(651.326400,3+) rtinseconds(1448) index(10539)  
 Title: Locus:1.1.1.1769.47  
 Data file 2011-11-12 - TFD - EP 5-6.mgf

Click mouse within plot area to zoom in by factor of two about that point  
 Or, Plot from  to  Da   
 Label all possible matches  Label matches used for scoring

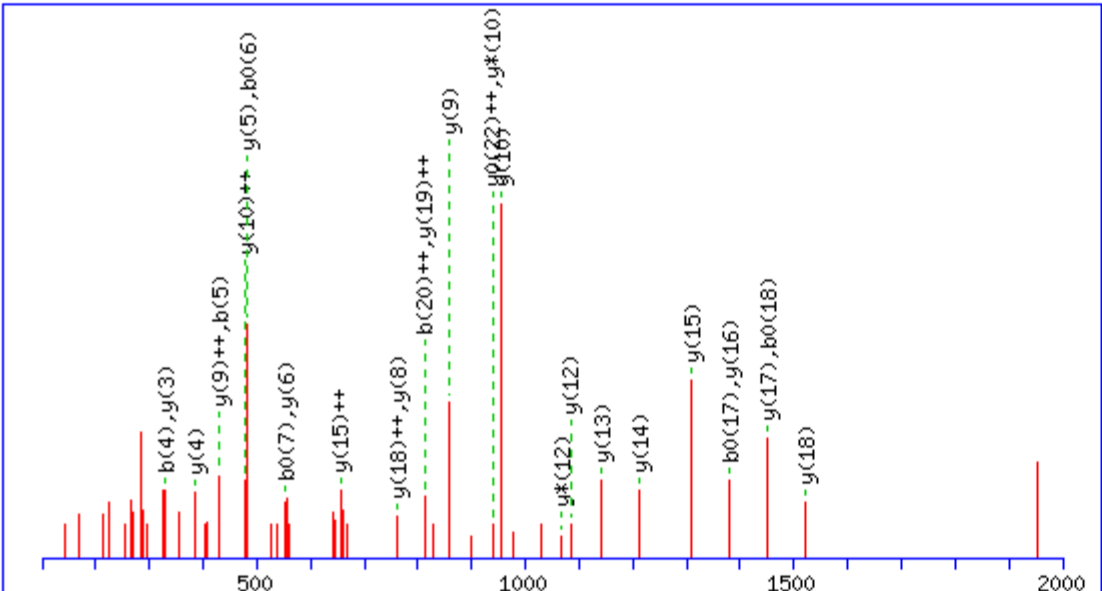

Monoisotopic mass of neutral peptide Mr(calc): 1950.966034  
 Fixed modifications: Propionamide (C) (apply to specified residues or termini only)  
 Ions Score: 116 Expect: 2.8e-011  
 Matches : 30/178 fragment ions using 27 most intense peaks ([help](#))

| #  | b           | b <sup>++</sup> | b <sup>0</sup> | b <sup>0++</sup> | Seq. | y           | y <sup>++</sup> | y <sup>*</sup> | y <sup>*++</sup> | y <sup>0</sup> | y <sup>0++</sup> | #  |
|----|-------------|-----------------|----------------|------------------|------|-------------|-----------------|----------------|------------------|----------------|------------------|----|
| 1  | 58.028740   | 29.518008       |                |                  | G    |             |                 |                |                  |                |                  | 23 |
| 2  | 115.050204  | 58.028740       |                |                  | G    | 1894.951838 | 947.979557      | 1877.925289    | 939.466283       | 1876.941273    | 938.974274       | 22 |
| 3  | 214.118618  | 107.562947      |                |                  | V    | 1837.930374 | 919.468825      | 1820.903825    | 910.955550       | 1819.919809    | 910.463542       | 21 |
| 4  | 329.145561  | 165.076418      | 311.134996     | 156.071136       | D    | 1738.861960 | 869.934618      | 1721.835411    | 861.421344       | 1720.851395    | 860.929335       | 20 |
| 5  | 430.193240  | 215.600258      | 412.182675     | 206.594976       | T    | 1623.835017 | 812.421146      | 1606.808468    | 803.907872       | 1605.824452    | 803.415864       | 19 |
| 6  | 501.230354  | 251.118815      | 483.219789     | 242.113532       | A    | 1522.787338 | 761.897307      | 1505.760789    | 753.384032       |                |                  | 18 |
| 7  | 572.267468  | 286.637372      | 554.256903     | 277.632090       | A    | 1451.750224 | 726.378750      | 1434.723675    | 717.865476       |                |                  | 17 |
| 8  | 643.304582  | 322.155929      | 625.294017     | 313.150646       | A    | 1380.713110 | 690.860193      | 1363.686561    | 682.346919       |                |                  | 16 |
| 9  | 740.357346  | 370.682311      | 722.346781     | 361.677029       | P    | 1309.675996 | 655.341636      | 1292.649447    | 646.828362       |                |                  | 15 |
| 10 | 811.394460  | 406.200868      | 793.383895     | 397.195585       | A    | 1212.623232 | 606.815254      | 1195.596683    | 598.301980       |                |                  | 14 |
| 11 | 868.415924  | 434.711600      | 850.405359     | 425.706318       | G    | 1141.586118 | 571.296697      | 1124.559569    | 562.783423       |                |                  | 13 |
| 12 | 925.437388  | 463.222332      | 907.426823     | 454.217050       | G    | 1084.564654 | 542.785965      | 1067.538105    | 534.272691       |                |                  | 12 |
| 13 | 996.474502  | 498.740889      | 978.463937     | 489.735607       | A    | 1027.543190 | 514.275233      | 1010.516641    | 505.761958       |                |                  | 11 |
| 14 | 1093.527266 | 547.267271      | 1075.516701    | 538.261989       | P    | 956.506076  | 478.756676      | 939.479527     | 470.243401       |                |                  | 10 |
| 15 | 1190.580030 | 595.793653      | 1172.569465    | 586.788371       | P    | 859.453312  | 430.230294      | 842.426763     | 421.717019       |                |                  | 9  |
| 16 | 1261.617144 | 631.312210      | 1243.606579    | 622.306928       | A    | 762.400548  | 381.703912      | 745.373999     | 373.190637       |                |                  | 8  |
| 17 | 1398.676056 | 699.841666      | 1380.665491    | 690.836384       | H    | 691.363434  | 346.185355      | 674.336885     | 337.672080       |                |                  | 7  |
| 18 | 1469.713170 | 735.360223      | 1451.702605    | 726.354941       | A    | 554.304522  | 277.655899      | 537.277973     | 269.142624       |                |                  | 6  |
| 19 | 1566.765934 | 783.886605      | 1548.755369    | 774.881323       | P    | 483.267408  | 242.137342      | 466.240859     | 233.624067       |                |                  | 5  |
| 20 | 1623.787398 | 812.397337      | 1605.776833    | 803.392054       | G    | 386.214644  | 193.610960      | 369.188095     | 185.097685       |                |                  | 4  |
| 21 | 1720.840162 | 860.923719      | 1702.829597    | 851.918436       | P    | 329.193180  | 165.100228      | 312.166631     | 156.586953       |                |                  | 3  |
| 22 | 1777.861626 | 889.434451      | 1759.851061    | 880.429168       | G    | 232.140416  | 116.573846      | 215.113867     | 108.060571       |                |                  | 2  |
| 23 |             |                 |                |                  | R    | 175.118952  | 88.063114       | 158.092403     | 79.549839        |                |                  | 1  |

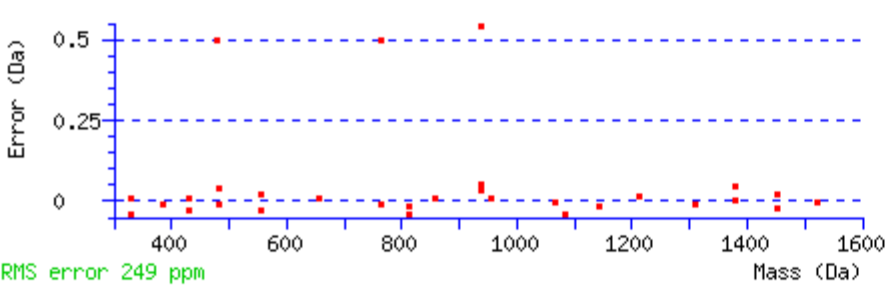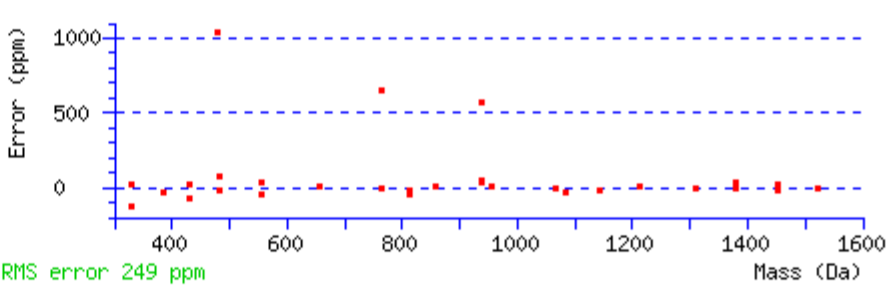

NCBI BLAST search of **GGVDTAAAPAGGAPPAHAPGPGR**  
 (Parameters: blastp, nr protein database, expect=20000, no filter, PAM30)  
 Other BLAST [web gateways](#)

**All matches to this query**

| Score | Mr(calc):   | Delta     | Sequence                                |
|-------|-------------|-----------|-----------------------------------------|
| 116.4 | 1950.966034 | -0.008662 | <a href="#">GGVDTAAAPAGGAPPAHAPGPGR</a> |
| 3.6   | 1950.964691 | -0.007319 | <a href="#">AGQEPPKPGTDVIPAAPR</a>      |
| 1.1   | 1950.951614 | 0.005758  | <a href="#">LITRAHVECSPAHTCR</a>        |

# MASCOT Search Results

## Peptide View

MS/MS Fragmentation of **NLSSTTDDEAPR**

Found in **LAD1\_HUMAN**, Ladinin-1 OS=Homo sapiens GN=LAD1 PE=1 SV=2

Match to Query 645164: 1304.586188 from(653.300370,2+) rtinseconds(1212) index(247803)

Title: Locus:1.1.1.904.37

Data file C:\Program Files (x86)\Matrix Science\Mascot Daemon\mgf3 TFD - Epitel - R2\mascot\_daemon\_merge.mgf

Click mouse within plot area to zoom in by factor of two about that point

Or, Plot from  to  Da

Label all possible matches  Label matches used for scoring

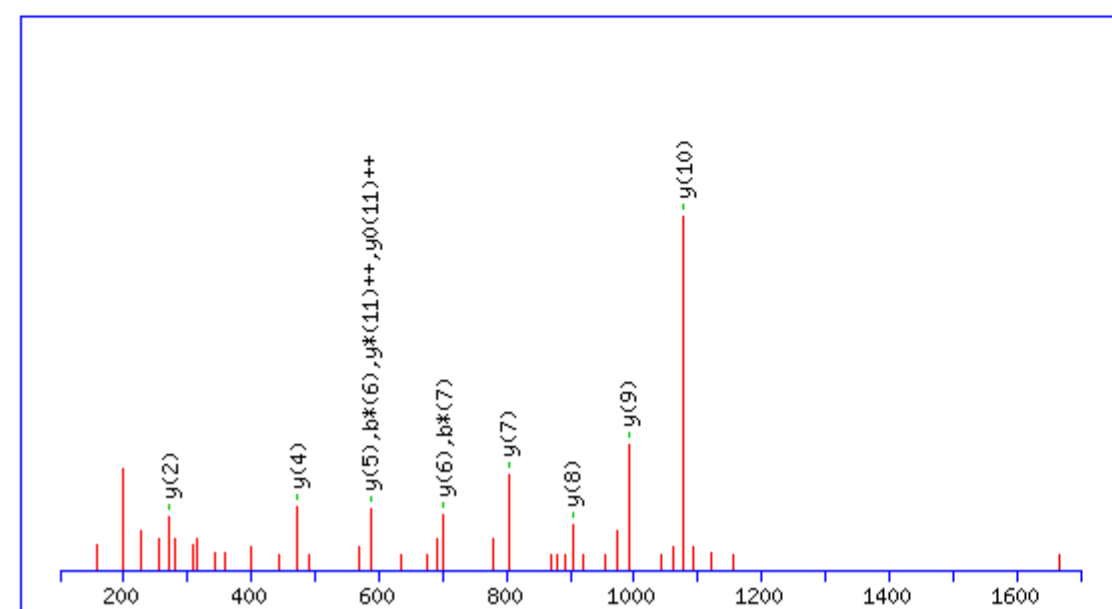

Monoisotopic mass of neutral peptide Mr(calcd): 1304.584427

Fixed modifications: Carbamidomethyl (C) (apply to specified residues or termini only)

Ions Score: 76 Expect: 2e-007

Matches : 12/122 fragment ions using 10 most intense peaks ([help](#))

| #  | b           | b <sup>++</sup> | b <sup>*</sup> | b <sup>*++</sup> | b <sup>0</sup> | b <sup>0++</sup> | Seq. | y           | y <sup>++</sup> | y <sup>*</sup> | y <sup>*++</sup> | y <sup>0</sup> | y <sup>0++</sup> | #  |
|----|-------------|-----------------|----------------|------------------|----------------|------------------|------|-------------|-----------------|----------------|------------------|----------------|------------------|----|
| 1  | 115.050203  | 58.028740       | 98.023654      | 49.515465        |                |                  | N    |             |                 |                |                  |                |                  | 12 |
| 2  | 228.134267  | 114.570771      | 211.107718     | 106.057497       |                |                  | L    | 1191.548787 | 596.278032      | 1174.522238    | 587.764757       | 1173.538222    | 587.272749       | 11 |
| 3  | 315.166295  | 158.086785      | 298.139746     | 149.573511       | 297.155730     | 149.081503       | S    | 1078.464723 | 539.736000      | 1061.438174    | 531.222725       | 1060.454158    | 530.730717       | 10 |
| 4  | 402.198323  | 201.602800      | 385.171774     | 193.089525       | 384.187758     | 192.597517       | S    | 991.432695  | 496.219986      | 974.406146     | 487.706711       | 973.422130     | 487.214703       | 9  |
| 5  | 503.246002  | 252.126639      | 486.219453     | 243.613365       | 485.235437     | 243.121357       | T    | 904.400667  | 452.703972      | 887.374118     | 444.190697       | 886.390102     | 443.698689       | 8  |
| 6  | 604.293681  | 302.650479      | 587.267132     | 294.137204       | 586.283116     | 293.645196       | T    | 803.352988  | 402.180132      | 786.326439     | 393.666858       | 785.342423     | 393.174850       | 7  |
| 7  | 719.320624  | 360.163950      | 702.294075     | 351.650676       | 701.310059     | 351.158668       | D    | 702.305309  | 351.656293      | 685.278760     | 343.143018       | 684.294744     | 342.651010       | 6  |
| 8  | 834.347567  | 417.677422      | 817.321018     | 409.164147       | 816.337002     | 408.672139       | D    | 587.278366  | 294.142821      | 570.251817     | 285.629547       | 569.267801     | 285.137539       | 5  |
| 9  | 963.390160  | 482.198718      | 946.363611     | 473.685444       | 945.379595     | 473.193436       | E    | 472.251423  | 236.629350      | 455.224874     | 228.116075       | 454.240858     | 227.624067       | 4  |
| 10 | 1034.427274 | 517.717275      | 1017.400725    | 509.204001       | 1016.416709    | 508.711993       | A    | 343.208830  | 172.108053      | 326.182281     | 163.594779       |                |                  | 3  |
| 11 | 1131.480038 | 566.243657      | 1114.453489    | 557.730383       | 1113.469473    | 557.238375       | P    | 272.171716  | 136.589496      | 255.145167     | 128.076221       |                |                  | 2  |
| 12 |             |                 |                |                  |                |                  | R    | 175.118952  | 88.063114       | 158.092403     | 79.549839        |                |                  | 1  |

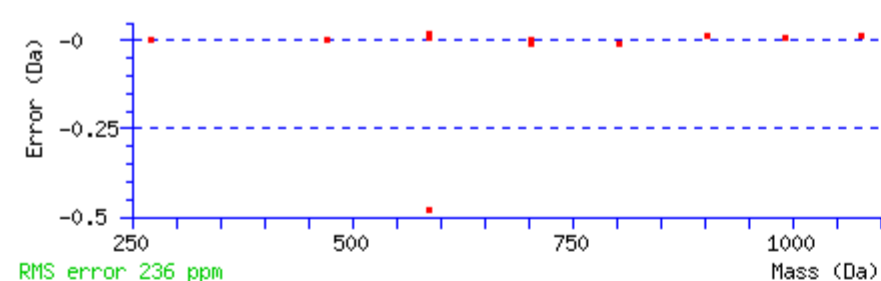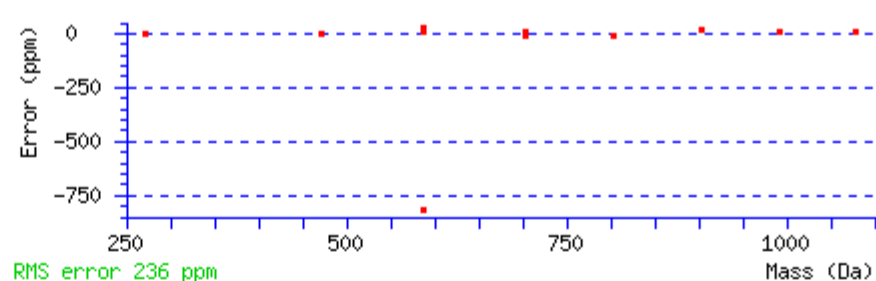

NCBI BLAST search of **NLSSTTDDEAPR**

(Parameters: blastp, nr protein database, expect=20000, no filter, PAM30)

Other BLAST [web gateways](#)

## All matches to this query

| Score | Mr(calcd):  | Delta     | Sequence                     |
|-------|-------------|-----------|------------------------------|
| 75.8  | 1304.584427 | 0.001761  | <a href="#">NLSSTTDDEAPR</a> |
| 4.1   | 1304.595871 | -0.009683 | <a href="#">WIVLDGDIDPM</a>  |
| 1.3   | 1304.593170 | -0.006982 | <a href="#">NLSGQPNFPCR</a>  |
| 1.3   | 1304.593170 | -0.006982 | <a href="#">NLSGQPNFPCR</a>  |
| 1.3   | 1304.593338 | -0.007150 | <a href="#">YSFQLWIAMM</a>   |
| 1.3   | 1304.593338 | -0.007150 | <a href="#">YSFQLWIAMM</a>   |

**Peptide View**

MS/MS Fragmentation of **VESLSQVEVILQHSAAADIAR**

Found in **LAMBI\_HUMAN**, Laminin subunit beta-1 OS=Homo sapiens GN=LAMB1 PE=1 SV=2

Match to Query 66829: 2164.130922 from(722.384250,3+) rtinseconds(3829) index(56921)

Title: Locus:1.1.1.2758.32

Data file 2011-11-12 - TFD - EP 6-1.mgf

Click mouse within plot area to zoom in by factor of two about that point

Or, Plot from  to  Da

Label all possible matches  Label matches used for scoring

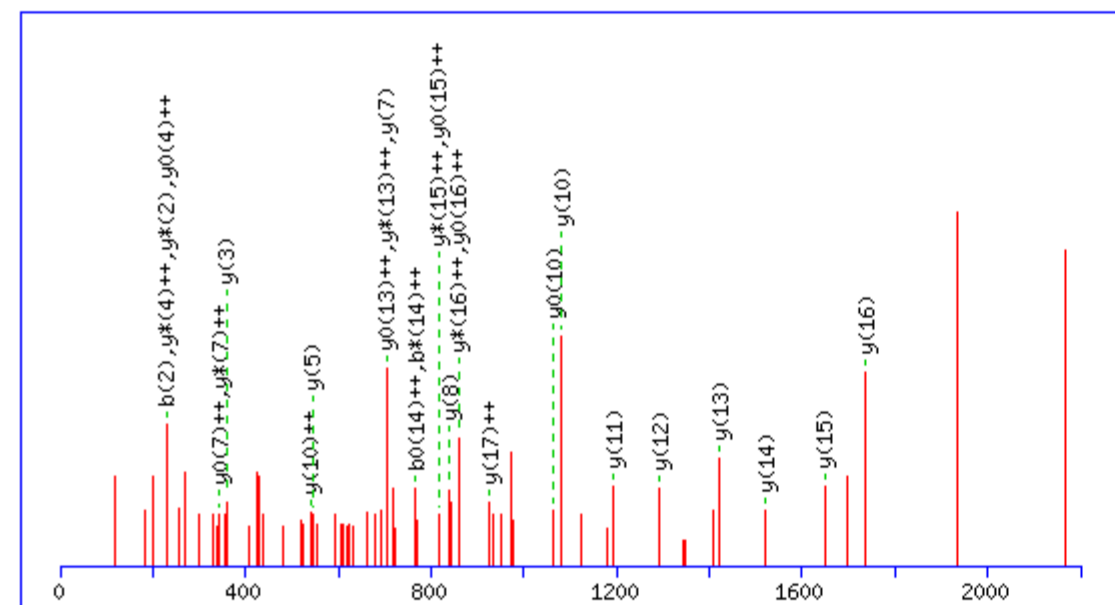

Monoisotopic mass of neutral peptide Mr(calc): 2164.148773

Fixed modifications: Propionamide (C) (apply to specified residues or termini only)

Ions Score: 70 Expect: 9.8e-007

Matches : 28/210 fragment ions using 31 most intense peaks [\(help\)](#)

| #  | b                 | b <sup>++</sup> | b <sup>*</sup> | b <sup>*++</sup>  | b <sup>0</sup> | b <sup>0++</sup>  | Seq. | y                  | y <sup>++</sup>   | y <sup>*</sup>    | y <sup>*++</sup>  | y <sup>0</sup>     | y <sup>0++</sup>  | #  |
|----|-------------------|-----------------|----------------|-------------------|----------------|-------------------|------|--------------------|-------------------|-------------------|-------------------|--------------------|-------------------|----|
| 1  | 100.075690        | 50.541483       |                |                   |                |                   | V    |                    |                   |                   |                   |                    |                   | 20 |
| 2  | <b>229.118283</b> | 115.062780      |                |                   | 211.107718     | 106.057497        | E    | 2066.087659        | 1033.547467       | 2049.061110       | 1025.034193       | 2048.077094        | 1024.542185       | 19 |
| 3  | 316.150311        | 158.578794      |                |                   | 298.139746     | 149.573511        | S    | 1937.045066        | 969.026171        | 1920.018517       | 960.512897        | 1919.034501        | 960.020888        | 18 |
| 4  | 429.234375        | 215.120826      |                |                   | 411.223810     | 206.115543        | L    | 1850.013038        | <b>925.510157</b> | 1832.986489       | 916.996882        | 1832.002473        | 916.504874        | 17 |
| 5  | 516.266403        | 258.636840      |                |                   | 498.255838     | 249.631557        | S    | <b>1736.928974</b> | 868.968125        | 1719.902425       | <b>860.454850</b> | 1718.918409        | <b>859.962842</b> | 16 |
| 6  | 644.324981        | 322.666129      | 627.298432     | 314.152854        | 626.314416     | 313.660846        | Q    | <b>1649.896946</b> | 825.452111        | 1632.870397       | <b>816.938836</b> | 1631.886381        | <b>816.446828</b> | 15 |
| 7  | 743.393395        | 372.200336      | 726.366846     | 363.687061        | 725.382830     | 363.195053        | V    | <b>1521.838368</b> | 761.422822        | 1504.811819       | 752.909548        | 1503.827803        | 752.417539        | 14 |
| 8  | 872.435988        | 436.721632      | 855.409439     | 428.208358        | 854.425423     | 427.716350        | E    | <b>1422.769954</b> | 711.888615        | 1405.743405       | <b>703.375340</b> | 1404.759389        | <b>702.883332</b> | 13 |
| 9  | 971.504402        | 486.255839      | 954.477853     | 477.742565        | 953.493837     | 477.250557        | V    | <b>1293.727361</b> | 647.367319        | 1276.700812       | 638.854044        | 1275.716796        | 638.362036        | 12 |
| 10 | 1084.588466       | 542.797871      | 1067.561917    | 534.284597        | 1066.577901    | 533.792588        | I    | <b>1194.658947</b> | 597.833111        | 1177.632398       | 589.319837        | 1176.648382        | 588.827829        | 11 |
| 11 | 1197.672530       | 599.339903      | 1180.645981    | 590.826628        | 1179.661965    | 590.334620        | L    | <b>1081.574883</b> | <b>541.291080</b> | 1064.548334       | 532.777805        | <b>1063.564318</b> | 532.285797        | 10 |
| 12 | 1325.731108       | 663.369192      | 1308.704559    | 654.855917        | 1307.720543    | 654.363909        | Q    | 968.490819         | 484.749048        | 951.464270        | 476.235773        | 950.480254         | 475.743765        | 9  |
| 13 | 1462.790020       | 731.898648      | 1445.763471    | 723.385373        | 1444.779455    | 722.893365        | H    | <b>840.432241</b>  | 420.719759        | 823.405692        | 412.206484        | 822.421676         | 411.714476        | 8  |
| 14 | 1549.822048       | 775.414662      | 1532.795499    | <b>766.901387</b> | 1531.811483    | <b>766.409379</b> | S    | <b>703.373329</b>  | 352.190303        | 686.346780        | <b>343.677028</b> | 685.362764         | <b>343.185020</b> | 7  |
| 15 | 1620.859162       | 810.933219      | 1603.832613    | 802.419944        | 1602.848597    | 801.927936        | A    | 616.341301         | 308.674289        | 599.314752        | 300.161014        | 598.330736         | 299.669006        | 6  |
| 16 | 1691.896276       | 846.451776      | 1674.869727    | 837.938501        | 1673.885711    | 837.446493        | A    | <b>545.304187</b>  | 273.155732        | 528.277638        | 264.642457        | 527.293622         | 264.150449        | 5  |
| 17 | 1806.923219       | 903.965247      | 1789.896670    | 895.451973        | 1788.912654    | 894.959965        | D    | 474.267073         | 237.637175        | 457.240524        | <b>229.123900</b> | 456.256508         | <b>228.631892</b> | 4  |
| 18 | 1920.007283       | 960.507279      | 1902.980734    | 951.994005        | 1901.996718    | 951.501997        | I    | <b>359.240130</b>  | 180.123703        | 342.213581        | 171.610429        |                    |                   | 3  |
| 19 | 1991.044397       | 996.025836      | 1974.017848    | 987.512562        | 1973.033832    | 987.020554        | A    | 246.156066         | 123.581671        | <b>229.129517</b> | 115.068397        |                    |                   | 2  |
| 20 |                   |                 |                |                   |                |                   | R    | 175.118952         | 88.063114         | 158.092403        | 79.549840         |                    |                   | 1  |

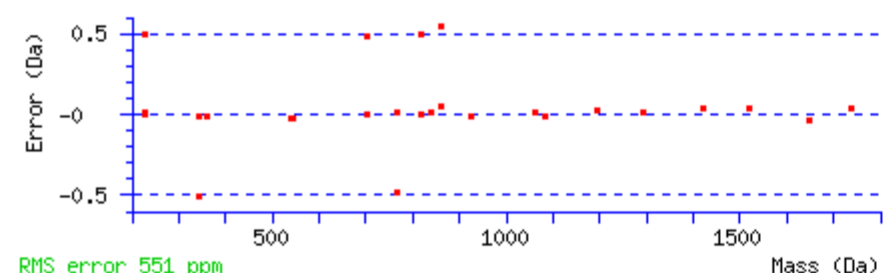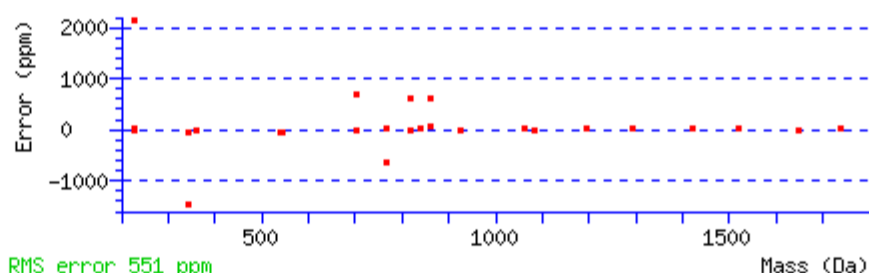

NCBI BLAST search of [VESLSQVEVILQHSAAADIAR](#)

(Parameters: blastp, nr protein database, expect=20000, no filter, PAM30)

Other BLAST [web gateways](#)

All matches to this query

| Score | Mr(calc):   | Delta     | Sequence                              |
|-------|-------------|-----------|---------------------------------------|
| 69.9  | 2164.148773 | -0.017851 | <a href="#">VESLSQVEVILQHSAAADIAR</a> |

# **MASCOT** Mascot Search Results

## Peptide View

MS/MS Fragmentation of **EVVNAIESGK**

Found in **LANC2\_HUMAN**, LanC-like protein 2 OS=Homo sapiens GN=LANCL2 PE=1 SV=1

Match to Query 20025: 1157.618188 from(579.816370,2+) rtinseconds(1985) index(22490)

Title: Locus:1.1.1.2244.24

Data file 2011-11-10 - TFD - EP 4-3.mgf

Click mouse within plot area to zoom in by factor of two about that point

Or, Plot from  to  Da

Label all possible matches  Label matches used for scoring

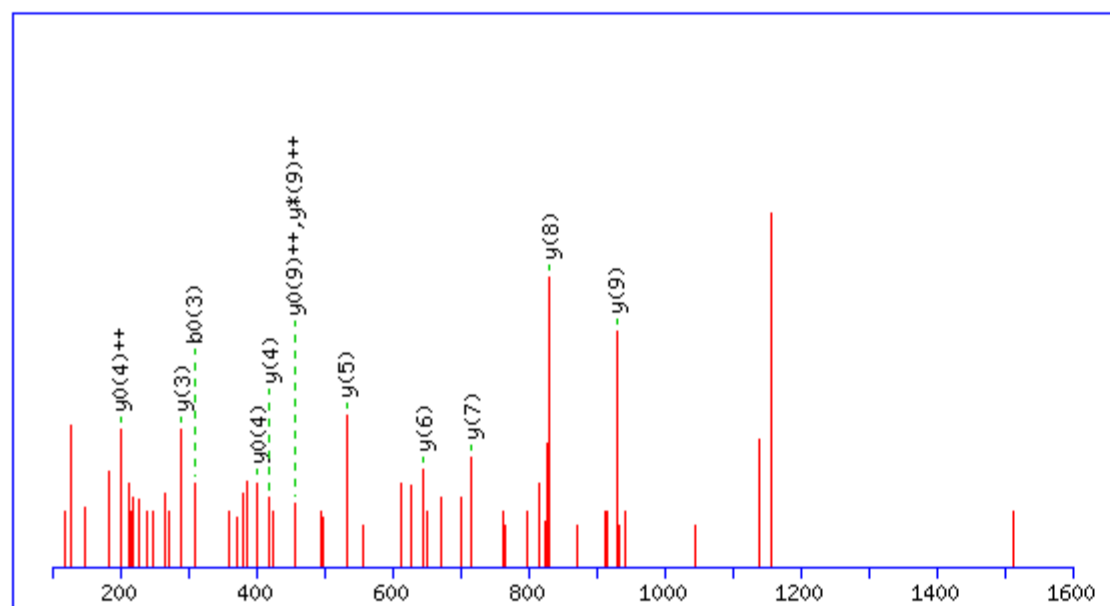

Monoisotopic mass of neutral peptide Mr(calc): 1157.629181

Fixed modifications: Propionamide (C) (apply to specified residues or termini only)

Ions Score: 44 Expect: 0.00057

Matches : 12/110 fragment ions using 21 most intense peaks [\(help\)](#)

| #  | b           | b <sup>++</sup> | b <sup>*</sup> | b <sup>+++</sup> | b <sup>0</sup> | b <sup>0++</sup> | Seq. | y           | y <sup>++</sup> | y <sup>*</sup> | y <sup>+++</sup> | y <sup>0</sup> | y <sup>0++</sup> | #  |
|----|-------------|-----------------|----------------|------------------|----------------|------------------|------|-------------|-----------------|----------------|------------------|----------------|------------------|----|
| 1  | 130.049869  | 65.528572       |                |                  | 112.039304     | 56.523290        | E    |             |                 |                |                  |                |                  | 11 |
| 2  | 229.118283  | 115.062780      |                |                  | 211.107718     | 106.057497       | V    | 1029.593886 | 515.300581      | 1012.567337    | 506.787307       | 1011.583321    | 506.295299       | 10 |
| 3  | 328.186697  | 164.596987      |                |                  | 310.176132     | 155.591704       | V    | 930.525472  | 465.766374      | 913.498923     | 457.253100       | 912.514907     | 456.761092       | 9  |
| 4  | 442.229624  | 221.618450      | 425.203075     | 213.105176       | 424.219059     | 212.613168       | N    | 831.457058  | 416.232167      | 814.430509     | 407.718893       | 813.446493     | 407.226885       | 8  |
| 5  | 513.266738  | 257.137007      | 496.240189     | 248.623733       | 495.256173     | 248.131725       | A    | 717.414131  | 359.210704      | 700.387582     | 350.697429       | 699.403566     | 350.205421       | 7  |
| 6  | 626.350802  | 313.679039      | 609.324253     | 305.165765       | 608.340237     | 304.673757       | I    | 646.377017  | 323.692147      | 629.350468     | 315.178872       | 628.366452     | 314.686864       | 6  |
| 7  | 739.434866  | 370.221071      | 722.408317     | 361.707797       | 721.424301     | 361.215789       | I    | 533.292953  | 267.150115      | 516.266404     | 258.636840       | 515.282388     | 258.144832       | 5  |
| 8  | 868.477459  | 434.742368      | 851.450910     | 426.229093       | 850.466894     | 425.737085       | E    | 420.208889  | 210.608082      | 403.182340     | 202.094808       | 402.198324     | 201.602800       | 4  |
| 9  | 955.509487  | 478.258382      | 938.482938     | 469.745107       | 937.498922     | 469.253099       | S    | 291.166296  | 146.086786      | 274.139747     | 137.573512       | 273.155731     | 137.081504       | 3  |
| 10 | 1012.530951 | 506.769114      | 995.504402     | 498.255839       | 994.520386     | 497.763831       | G    | 204.134268  | 102.570772      | 187.107719     | 94.057498        |                |                  | 2  |
| 11 |             |                 |                |                  |                |                  | K    | 147.112804  | 74.060040       | 130.086255     | 65.546765        |                |                  | 1  |

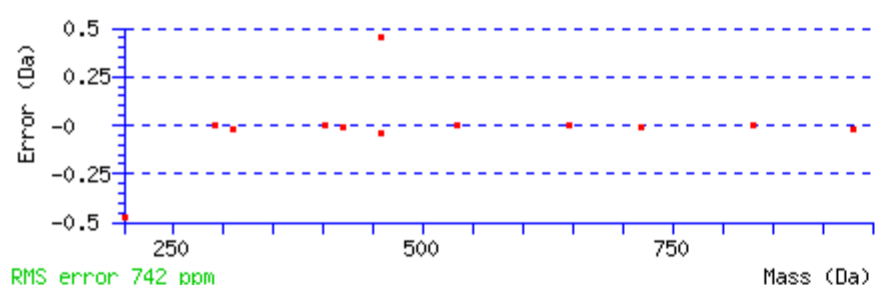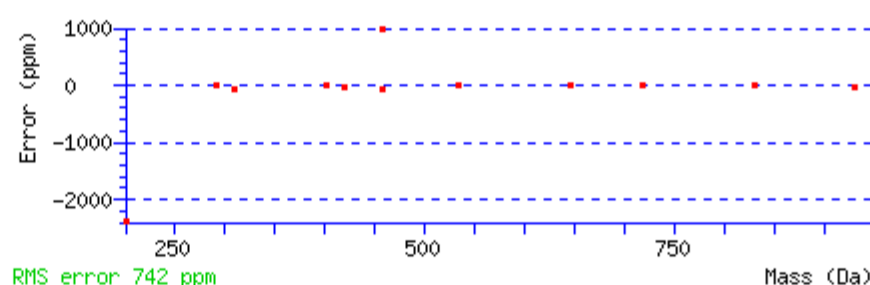

NCBI BLAST search of **EVVNAIESGK**

(Parameters: blastp, nr protein database, expect=20000, no filter, PAM30)

Other BLAST [web gateways](#)

All matches to this query

| Score | Mr(calc):   | Delta     | Sequence                    |
|-------|-------------|-----------|-----------------------------|
| 44.1  | 1157.629181 | -0.010993 | <a href="#">EVVNAIESGK</a>  |
| 15.0  | 1157.629181 | -0.010993 | <a href="#">IDIINAVESGK</a> |
| 6.6   | 1157.629181 | -0.010993 | <a href="#">VEVKEDAKPK</a>  |
| 4.8   | 1157.608063 | 0.010125  | <a href="#">KYQIFSGTSK</a>  |

# MASCOT SCIENCE Mascot Search Results

## Peptide View

MS/MS Fragmentation of **ILGVGPDDPDLVR**

Found in **ERG7\_HUMAN**, Lanosterol synthase OS=Homo sapiens GN=LSS PE=1 SV=1

Match to Query 40435: 1364.728188 from(683.371370,2+) rtinseconds(2766) index(36757)

Title: Locus:1.1.1.2490.40

Data file 2011-11-10 - TFD - EP 3-2.mgf

Click mouse within plot area to zoom in by factor of two about that point

Or, Plot from  to  Da

Label all possible matches  Label matches used for scoring

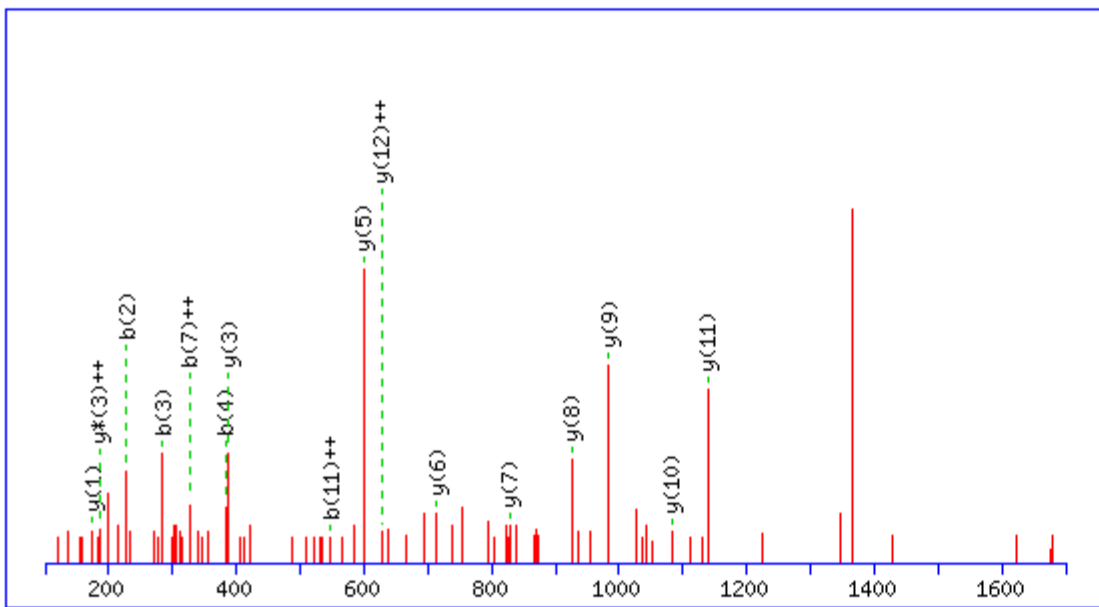

Monoisotopic mass of neutral peptide Mr(calc): 1364.729996

Fixed modifications: Propionamide (C) (apply to specified residues or termini only)

Ions Score: 36 Expect: 0.0026

Matches : 16/102 fragment ions using 51 most intense peaks [\(help\)](#)

| #  | b                 | b <sup>++</sup>   | b <sup>0</sup> | b <sup>0++</sup> | Seq. | y                  | y <sup>++</sup>   | y <sup>*</sup> | y <sup>*++</sup>  | y <sup>0</sup> | y <sup>0++</sup> | #  |
|----|-------------------|-------------------|----------------|------------------|------|--------------------|-------------------|----------------|-------------------|----------------|------------------|----|
| 1  | 114.091340        | 57.549308         |                |                  | I    |                    |                   |                |                   |                |                  | 13 |
| 2  | <b>227.175404</b> | 114.091340        |                |                  | L    | 1252.653193        | <b>626.830235</b> | 1235.626644    | 618.316960        | 1234.642628    | 617.824952       | 12 |
| 3  | <b>284.196868</b> | 142.602072        |                |                  | G    | <b>1139.569129</b> | 570.288203        | 1122.542580    | 561.774928        | 1121.558564    | 561.282920       | 11 |
| 4  | <b>383.265282</b> | 192.136279        |                |                  | V    | <b>1082.547665</b> | 541.777471        | 1065.521116    | 533.264196        | 1064.537100    | 532.772188       | 10 |
| 5  | 440.286746        | 220.647011        |                |                  | G    | <b>983.479251</b>  | 492.243264        | 966.452702     | 483.729989        | 965.468686     | 483.237981       | 9  |
| 6  | 537.339510        | 269.173393        |                |                  | P    | <b>926.457787</b>  | 463.732532        | 909.431238     | 455.219257        | 908.447222     | 454.727249       | 8  |
| 7  | 652.366453        | <b>326.686865</b> | 634.355888     | 317.681582       | D    | <b>829.405023</b>  | 415.206150        | 812.378474     | 406.692875        | 811.394458     | 406.200867       | 7  |
| 8  | 767.393396        | 384.200336        | 749.382831     | 375.195053       | D    | <b>714.378080</b>  | 357.692678        | 697.351531     | 349.179404        | 696.367515     | 348.687396       | 6  |
| 9  | 864.446160        | 432.726718        | 846.435595     | 423.721435       | P    | <b>599.351137</b>  | 300.179207        | 582.324588     | 291.665932        | 581.340572     | 291.173924       | 5  |
| 10 | 979.473103        | 490.240189        | 961.462538     | 481.234907       | D    | 502.298373         | 251.652824        | 485.271824     | 243.139550        | 484.287808     | 242.647542       | 4  |
| 11 | 1092.557167       | <b>546.782221</b> | 1074.546602    | 537.776939       | L    | <b>387.271430</b>  | 194.139353        | 370.244881     | <b>185.626079</b> |                |                  | 3  |
| 12 | 1191.625581       | 596.316429        | 1173.615016    | 587.311146       | V    | 274.187366         | 137.597321        | 257.160817     | 129.084047        |                |                  | 2  |
| 13 |                   |                   |                |                  | R    | <b>175.118952</b>  | 88.063114         | 158.092403     | 79.549839         |                |                  | 1  |

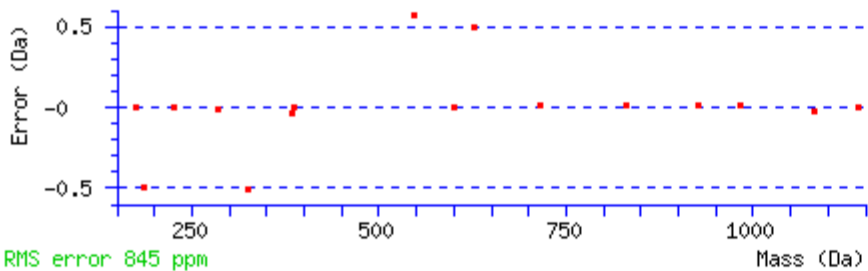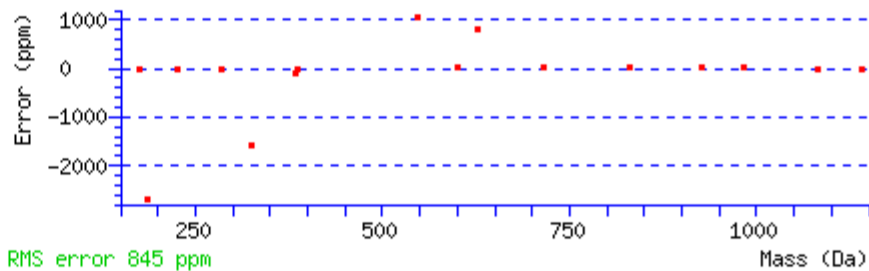

NCBI BLAST search of **ILGVGPDDPDLVR**

(Parameters: blastp, nr protein database, expect=20000, no filter, PAM30)

Other BLAST [web gateways](#)

All matches to this query

| Score | Mr(calc):   | Delta     | Sequence                      |
|-------|-------------|-----------|-------------------------------|
| 35.6  | 1364.729996 | -0.001808 | <a href="#">ILGVGPDDPDLVR</a> |

Mascot: <http://www.matrixscience.com/>



# MASCOT Search Results

## Peptide View

MS/MS Fragmentation of **WPAQRPVPGIR**

Found in **LRFN1\_HUMAN**, Leucine-rich repeat and fibronectin type III domain-containing protein 1 OS=Homo sapiens  
GN=LRFN1 PE=1 SV=2

Match to Query 37167: 1323.710172 from(442.244000,3+) rtinseconds(1663) index(16084)

Title: Locus:1.1.1.2046.11

Data file 2011-11-14 - TFD - EP 8-1.mgf

Click mouse within plot area to zoom in by factor of two about that point

Or,   to  Da

Label all possible matches  Label matches used for scoring

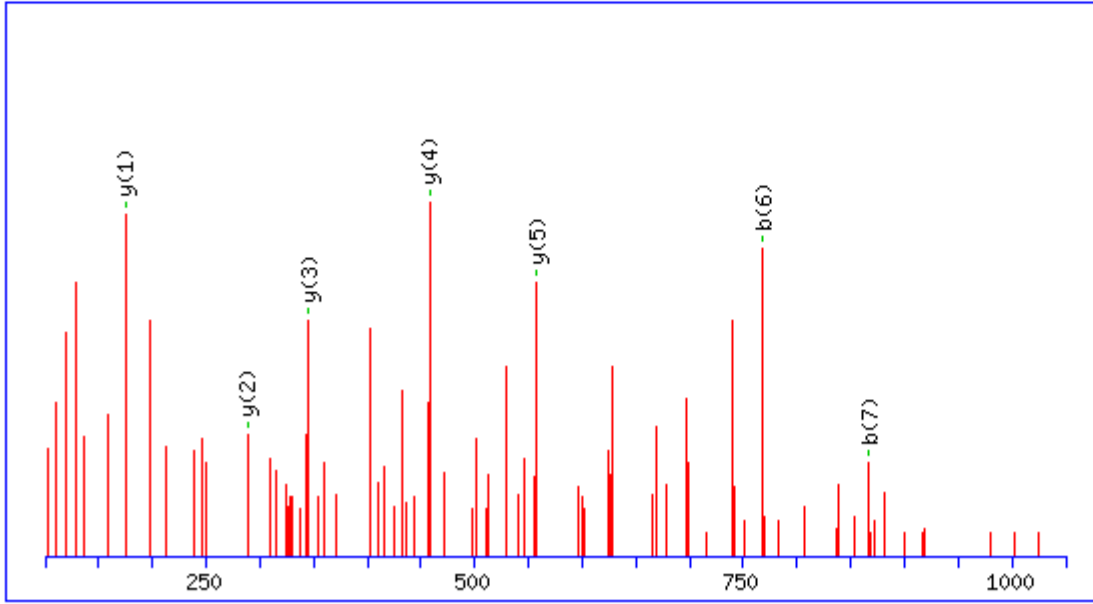

Monoisotopic mass of neutral peptide Mr(calc): 1323.704773

Fixed modifications: Propionamide (C) (apply to specified residues or termini only)

Variable modifications:

P2 : Oxidation (P)

P6 : Oxidation (P)

P8 : Oxidation (P)

Ions Score: 32 Expect: 0.0041

Matches : 7/74 fragment ions using 10 most intense peaks ([help](#))

| #  | b                 | b <sup>++</sup> | b <sup>*</sup> | b <sup>++</sup> | Seq. | y                 | y <sup>++</sup> | y <sup>*</sup> | y <sup>++</sup> | #  |
|----|-------------------|-----------------|----------------|-----------------|------|-------------------|-----------------|----------------|-----------------|----|
| 1  | 187.086589        | 94.046932       |                |                 | W    |                   |                 |                |                 | 11 |
| 2  | 300.134268        | 150.570772      |                |                 | P    | 1138.632734       | 569.820005      | 1121.606185    | 561.306731      | 10 |
| 3  | 371.171382        | 186.089329      |                |                 | A    | 1025.585055       | 513.296166      | 1008.558506    | 504.782891      | 9  |
| 4  | 499.229960        | 250.118618      | 482.203411     | 241.605343      | Q    | 954.547941        | 477.777609      | 937.521392     | 469.264334      | 8  |
| 5  | 655.331071        | 328.169174      | 638.304522     | 319.655899      | R    | 826.489363        | 413.748320      | 809.462814     | 405.235045      | 7  |
| 6  | <b>768.378750</b> | 384.693013      | 751.352201     | 376.179739      | P    | 670.388252        | 335.697764      | 653.361703     | 327.184489      | 6  |
| 7  | <b>867.447164</b> | 434.227220      | 850.420615     | 425.713946      | V    | <b>557.340573</b> | 279.173925      | 540.314024     | 270.660650      | 5  |
| 8  | 980.494843        | 490.751060      | 963.468294     | 482.237785      | P    | <b>458.272159</b> | 229.639717      | 441.245610     | 221.126443      | 4  |
| 9  | 1037.516307       | 519.261792      | 1020.489758    | 510.748517      | G    | <b>345.224480</b> | 173.115878      | 328.197931     | 164.602603      | 3  |
| 10 | 1150.600371       | 575.803824      | 1133.573822    | 567.290549      | I    | <b>288.203016</b> | 144.605146      | 271.176467     | 136.091871      | 2  |
| 11 |                   |                 |                |                 | R    | <b>175.118952</b> | 88.063114       | 158.092403     | 79.549839       | 1  |

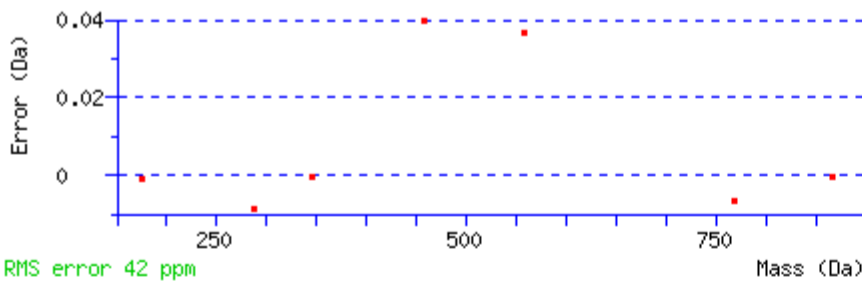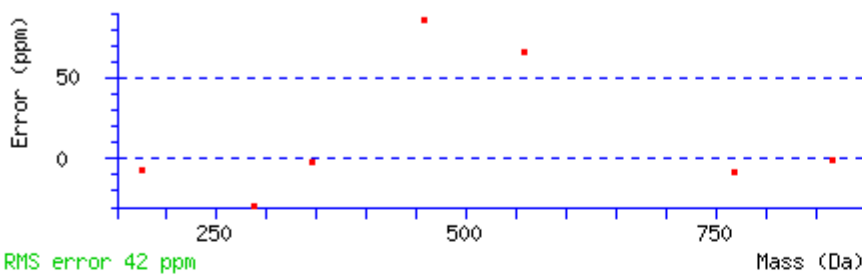

NCBI BLAST search of [WPAQRPVPGIR](#)

(Parameters: blastp, nr protein database, expect=20000, no filter, PAM30)

Other BLAST [web gateways](#)

All matches to this query

| Score | Mr(calc):   | Delta     | Sequence                       |
|-------|-------------|-----------|--------------------------------|
| 32.5  | 1323.704773 | 0.005399  | <a href="#">WPAQRPVPGIR</a>    |
| 9.3   | 1323.714645 | -0.004473 | <a href="#">DKTLESILHPR</a>    |
| 4.5   | 1323.714645 | -0.004473 | <a href="#">SAEALGPGALVSPR</a> |
| 2.5   | 1323.698227 | 0.011945  | <a href="#">IFTHHLCRAR</a>     |
| 2.4   | 1323.722061 | -0.011889 | <a href="#">MPPPTILSTVPR</a>   |
| 1.7   | 1323.700729 | 0.009443  | <a href="#">SSAPRSPTPRPR</a>   |
| 1.0   | 1323.714676 | -0.004504 | <a href="#">GGDGIKPPPIGR</a>   |
| 0.5   | 1323.704758 | 0.005414  | <a href="#">LKDTHAGAGWLR</a>   |
| 0.5   | 1323.715988 | -0.005816 | <a href="#">WHASQTRGLIR</a>    |

# MASCOT SCIENCE Mascot Search Results

## Peptide View

MS/MS Fragmentation of **EGGDGEEQDVG DAGR**

Found in **LRC47\_HUMAN**, Leucine-rich repeat-containing protein 47 OS=Homo sapiens GN=LRRC47 PE=1 SV=1

Match to Query 830122: 1489.595328 from(745.804940,2+) rtinseconds(1054) index(244794)

Title: Locus:1.1.1.842.47

Data file C:\Program Files (x86)\Matrix Science\Mascot Daemon\mgf3 TFD - Epitel - R2\mascot\_daemon\_merge.mgf

Click mouse within plot area to zoom in by factor of two about that point

Or, Plot from  to  Da

Label all possible matches  Label matches used for scoring

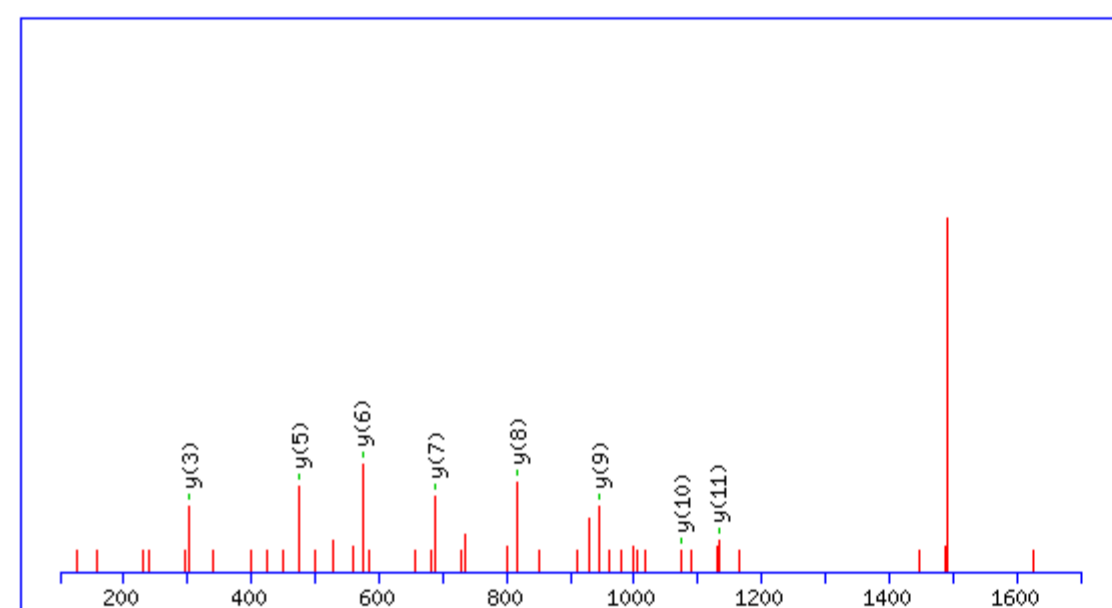

Monoisotopic mass of neutral peptide Mr(calc): 1489.591721

Fixed modifications: Carbamidomethyl (C) (apply to specified residues or termini only)

Ions Score: 62 Expect: 1.5e-006

Matches: 8/148 fragment ions using 12 most intense peaks ([help](#))

| #  | b           | b <sup>++</sup> | b <sup>*</sup> | b <sup>*++</sup> | b <sup>0</sup> | b <sup>0++</sup> | Seq. | y                  | y <sup>++</sup> | y <sup>*</sup> | y <sup>*++</sup> | y <sup>0</sup> | y <sup>0++</sup> | #  |
|----|-------------|-----------------|----------------|------------------|----------------|------------------|------|--------------------|-----------------|----------------|------------------|----------------|------------------|----|
| 1  | 130.049869  | 65.528572       |                |                  | 112.039304     | 56.523290        | E    |                    |                 |                |                  |                |                  | 15 |
| 2  | 187.071333  | 94.039305       |                |                  | 169.060768     | 85.034022        | G    | 1361.556393        | 681.281835      | 1344.529844    | 672.768560       | 1343.545828    | 672.276552       | 14 |
| 3  | 244.092797  | 122.550037      |                |                  | 226.082232     | 113.544754       | G    | 1304.534929        | 652.771102      | 1287.508380    | 644.257828       | 1286.524364    | 643.765820       | 13 |
| 4  | 359.119740  | 180.063508      |                |                  | 341.109175     | 171.058226       | D    | 1247.513465        | 624.260371      | 1230.486916    | 615.747096       | 1229.502900    | 615.255088       | 12 |
| 5  | 416.141204  | 208.574240      |                |                  | 398.130639     | 199.568958       | G    | <b>1132.486522</b> | 566.746899      | 1115.459973    | 558.233625       | 1114.475957    | 557.741616       | 11 |
| 6  | 545.183797  | 273.095537      |                |                  | 527.173232     | 264.090254       | E    | <b>1075.465058</b> | 538.236167      | 1058.438509    | 529.722893       | 1057.454493    | 529.230885       | 10 |
| 7  | 674.226390  | 337.616833      |                |                  | 656.215825     | 328.611551       | E    | <b>946.422465</b>  | 473.714870      | 929.395916     | 465.201596       | 928.411900     | 464.709588       | 9  |
| 8  | 802.284968  | 401.646122      | 785.258419     | 393.132848       | 784.274403     | 392.640840       | Q    | <b>817.379872</b>  | 409.193574      | 800.353323     | 400.680299       | 799.369307     | 400.188291       | 8  |
| 9  | 917.311911  | 459.159594      | 900.285362     | 450.646319       | 899.301346     | 450.154311       | D    | <b>689.321294</b>  | 345.164285      | 672.294745     | 336.651010       | 671.310729     | 336.159002       | 7  |
| 10 | 1016.380325 | 508.693801      | 999.353776     | 500.180526       | 998.369760     | 499.688518       | V    | <b>574.294351</b>  | 287.650813      | 557.267802     | 279.137539       | 556.283786     | 278.645531       | 6  |
| 11 | 1073.401789 | 537.204533      | 1056.375240    | 528.691258       | 1055.391224    | 528.199250       | G    | <b>475.225937</b>  | 238.116606      | 458.199388     | 229.603332       | 457.215372     | 229.111324       | 5  |
| 12 | 1188.428732 | 594.718004      | 1171.402183    | 586.204730       | 1170.418167    | 585.712722       | D    | 418.204473         | 209.605874      | 401.177924     | 201.092600       | 400.193908     | 200.600592       | 4  |
| 13 | 1259.465846 | 630.236561      | 1242.439297    | 621.723287       | 1241.455281    | 621.231279       | A    | <b>303.177530</b>  | 152.092403      | 286.150981     | 143.579128       |                |                  | 3  |
| 14 | 1316.487310 | 658.747293      | 1299.460761    | 650.234019       | 1298.476745    | 649.742010       | G    | 232.140416         | 116.573846      | 215.113867     | 108.060571       |                |                  | 2  |
| 15 |             |                 |                |                  |                |                  | R    | 175.118952         | 88.063114       | 158.092403     | 79.549839        |                |                  | 1  |

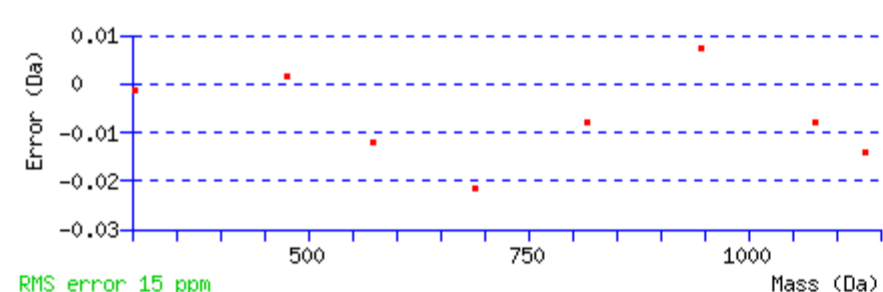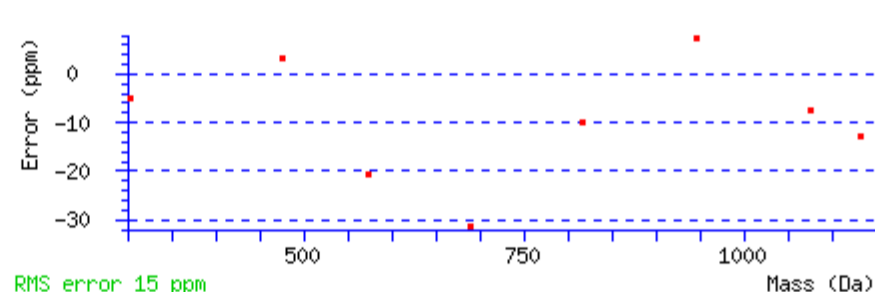

NCBI BLAST search of [EGGDGEEQDVG DAGR](#)

(Parameters: blastp, nr protein database, expect=20000, no filter, PAM30)

Other BLAST [web gateways](#)

## All matches to this query

| Score | Mr(calc):   | Delta    | Sequence                         |
|-------|-------------|----------|----------------------------------|
| 61.6  | 1489.591721 | 0.003607 | <a href="#">EGGDGEEQDVG DAGR</a> |

Mascot: <http://www.matrixscience.com/>

# Mascot Search Results

## Peptide View

MS/MS Fragmentation of **LVTLPVSAQLK**

Found in **LRC59\_HUMAN**, Leucine-rich repeat-containing protein 59 OS=Homo sapiens GN=LRRC59 PE=1 SV=1

Match to Query 32487: 1314.780868 from(658.397710,2+) rtinseconds(3386) index(48645)

Title: Locus:1.1.1.1728.25

Data file 2012-01-27 - TFD - Epitel - IEC - 10ul - 3.mgf

Click mouse within plot area to zoom in by factor of two about that point

Or, Plot from  to  Da

Label all possible matches  Label matches used for scoring

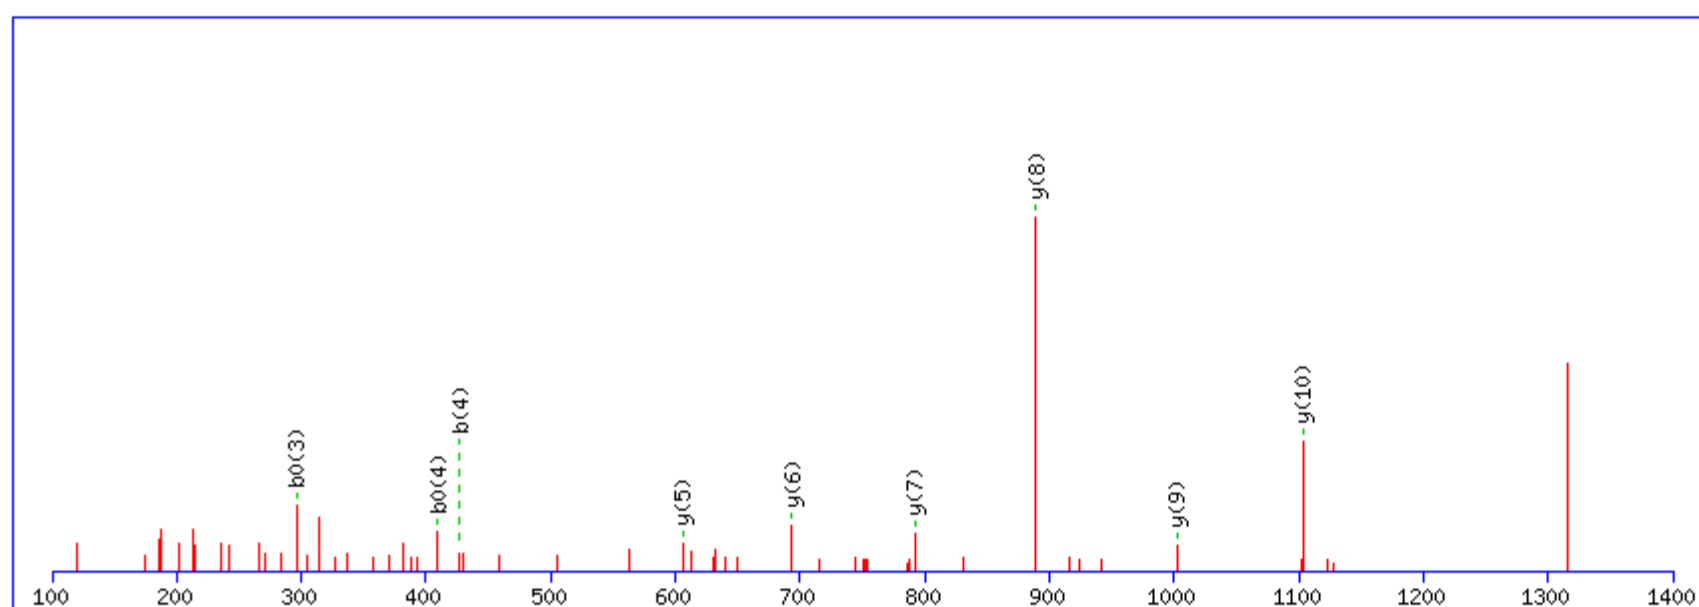

Monoisotopic mass of neutral peptide Mr(calc): 1314.791122

Fixed modifications: Carbamidomethyl (C) (apply to specified residues or termini only)

Ions Score: 40 Expect: 0.00023

Matches : 9/100 fragment ions using 11 most intense peaks ([help](#))

| #  | b           | b <sup>++</sup> | b <sup>*</sup> | b <sup>*++</sup> | b <sup>0</sup> | b <sup>0++</sup> | Seq. | y           | y <sup>++</sup> | y <sup>*</sup> | y <sup>*++</sup> | y <sup>0</sup> | y <sup>0++</sup> | #  |
|----|-------------|-----------------|----------------|------------------|----------------|------------------|------|-------------|-----------------|----------------|------------------|----------------|------------------|----|
| 1  | 114.091340  | 57.549308       |                |                  |                |                  | L    |             |                 |                |                  |                |                  | 12 |
| 2  | 213.159754  | 107.083515      |                |                  |                |                  | V    | 1202.714337 | 601.860807      | 1185.687788    | 593.347532       | 1184.703772    | 592.855524       | 11 |
| 3  | 314.207433  | 157.607354      |                |                  | 296.196868     | 148.602072       | T    | 1103.645923 | 552.326600      | 1086.619374    | 543.813325       | 1085.635358    | 543.321317       | 10 |
| 4  | 427.291497  | 214.149386      |                |                  | 409.280932     | 205.144104       | L    | 1002.598244 | 501.802760      | 985.571695     | 493.289486       | 984.587679     | 492.797478       | 9  |
| 5  | 524.344261  | 262.675769      |                |                  | 506.333696     | 253.670486       | P    | 889.514180  | 445.260728      | 872.487631     | 436.747454       | 871.503615     | 436.255446       | 8  |
| 6  | 623.412675  | 312.209976      |                |                  | 605.402110     | 303.204693       | V    | 792.461416  | 396.734346      | 775.434867     | 388.221071       | 774.450851     | 387.729064       | 7  |
| 7  | 710.444703  | 355.725990      |                |                  | 692.434138     | 346.720707       | S    | 693.393002  | 347.200139      | 676.366453     | 338.686865       | 675.382437     | 338.194857       | 6  |
| 8  | 857.513117  | 429.260197      |                |                  | 839.502552     | 420.254914       | F    | 606.360974  | 303.684125      | 589.334425     | 295.170851       |                |                  | 5  |
| 9  | 928.550231  | 464.778753      |                |                  | 910.539666     | 455.773471       | A    | 459.292560  | 230.149918      | 442.266011     | 221.636643       |                |                  | 4  |
| 10 | 1056.608809 | 528.808043      | 1039.582260    | 520.294768       | 1038.598244    | 519.802760       | Q    | 388.255446  | 194.631361      | 371.228897     | 186.118087       |                |                  | 3  |
| 11 | 1169.692873 | 585.350075      | 1152.666324    | 576.836800       | 1151.682308    | 576.344792       | L    | 260.196868  | 130.602072      | 243.170319     | 122.088797       |                |                  | 2  |
| 12 |             |                 |                |                  |                |                  | K    | 147.112804  | 74.060040       | 130.086255     | 65.546765        |                |                  | 1  |

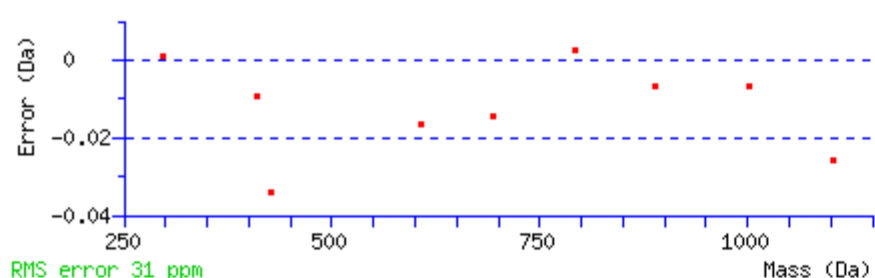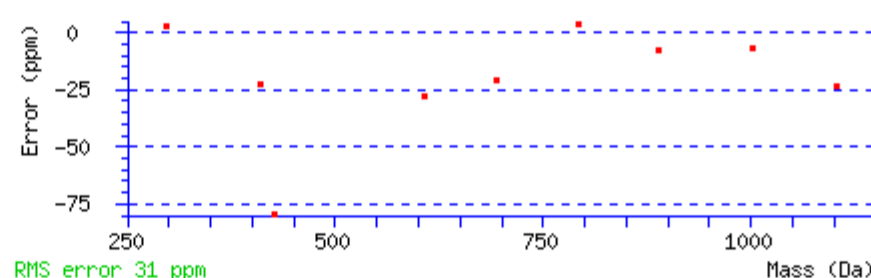

NCBI BLAST search of [LVTLPVSAQLK](#)

(Parameters: blastp, nr protein database, expect=20000, no filter, PAM30)

Other BLAST [web gateways](#)

All matches to this query

| Score | Mr(calc):   | Delta     | Sequence                      |
|-------|-------------|-----------|-------------------------------|
| 39.9  | 1314.791122 | -0.010254 | <a href="#">LVTLPVSAQLK</a>   |
| 2.4   | 1314.775848 | 0.005020  | <a href="#">LAVSLAETTGLIK</a> |
| 0.4   | 1314.791122 | -0.010254 | <a href="#">PTPVIKAFGLK</a>   |

**Peptide View**

MS/MS Fragmentation of **EQIPAGTLLAVEDPEKR**  
 Found in **FUK\_HUMAN**, L-fucose kinase OS=Homo sapiens GN=FUK PE=2 SV=2

Match to Query 62585: 1978.073082 from(660.364970,3+) rtinseconds(3333) index(46687)  
 Title: Locus:1.1.1.2753.28  
 Data file 2011-11-10 - TFD - EP 4-2.mgf

Click mouse within plot area to zoom in by factor of two about that point  
 Or, Plot from  to  Da   
 Label all possible matches  Label matches used for scoring

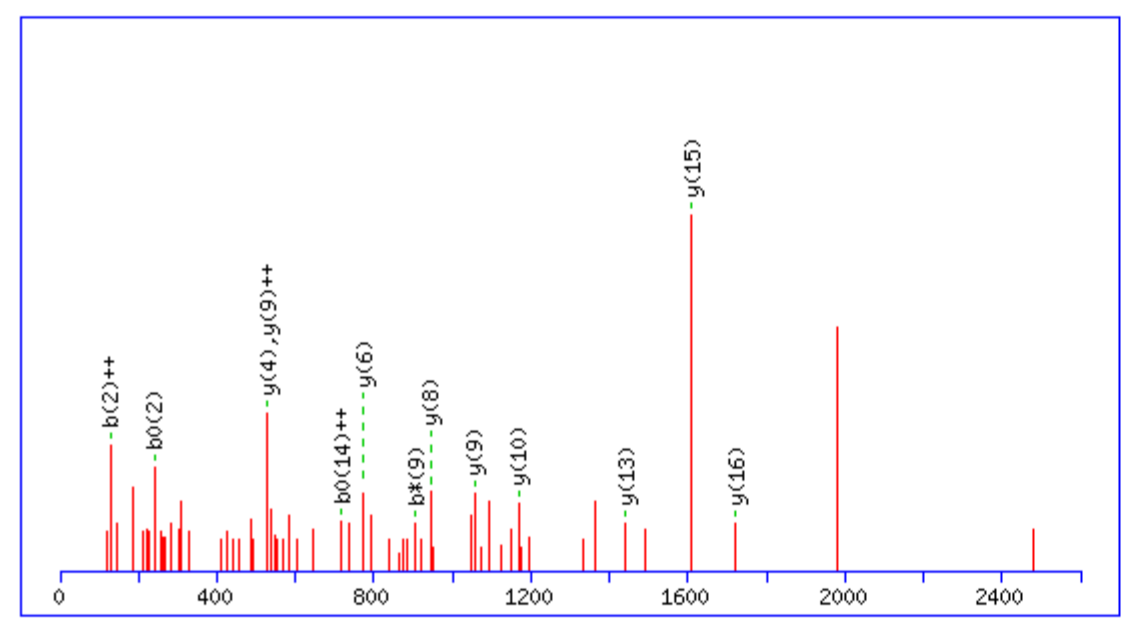

Monoisotopic mass of neutral peptide Mr(calc): 1978.073471  
 Fixed modifications: Propionamide (C) (apply to specified residues or termini only)  
 Ions Score: 48 Expect: 5.4e-005  
 Matches : 13/198 fragment ions using 15 most intense peaks [\(help\)](#)

| #  | b           | b <sup>++</sup> | b <sup>*</sup> | b <sup>*++</sup> | b <sup>0</sup> | b <sup>0++</sup> | Seq. | y           | y <sup>++</sup> | y <sup>*</sup> | y <sup>*++</sup> | y <sup>0</sup> | y <sup>0++</sup> | #  |
|----|-------------|-----------------|----------------|------------------|----------------|------------------|------|-------------|-----------------|----------------|------------------|----------------|------------------|----|
| 1  | 130.049869  | 65.528572       |                |                  | 112.039304     | 56.523290        | E    |             |                 |                |                  |                |                  | 18 |
| 2  | 258.108447  | 129.557862      | 241.081898     | 121.044587       | 240.097882     | 120.552579       | Q    | 1850.038191 | 925.522733      | 1833.011642    | 917.009459       | 1832.027626    | 916.517451       | 17 |
| 3  | 371.192511  | 186.099894      | 354.165962     | 177.586619       | 353.181946     | 177.094611       | I    | 1721.979613 | 861.493445      | 1704.953064    | 852.980170       | 1703.969048    | 852.488162       | 16 |
| 4  | 468.245275  | 234.626276      | 451.218726     | 226.113001       | 450.234710     | 225.620993       | P    | 1608.895549 | 804.951413      | 1591.869000    | 796.438138       | 1590.884984    | 795.946130       | 15 |
| 5  | 539.282389  | 270.144833      | 522.255840     | 261.631558       | 521.271824     | 261.139550       | A    | 1511.842785 | 756.425031      | 1494.816236    | 747.911756       | 1493.832220    | 747.419748       | 14 |
| 6  | 596.303853  | 298.655565      | 579.277304     | 290.142290       | 578.293288     | 289.650282       | G    | 1440.805671 | 720.906473      | 1423.779122    | 712.393199       | 1422.795106    | 711.901191       | 13 |
| 7  | 697.351532  | 349.179404      | 680.324983     | 340.666130       | 679.340967     | 340.174122       | T    | 1383.784207 | 692.395741      | 1366.757658    | 683.882467       | 1365.773642    | 683.390459       | 12 |
| 8  | 810.435596  | 405.721436      | 793.409047     | 397.208162       | 792.425031     | 396.716154       | L    | 1282.736528 | 641.871902      | 1265.709979    | 633.358628       | 1264.725963    | 632.866619       | 11 |
| 9  | 923.519660  | 462.263468      | 906.493111     | 453.750194       | 905.509095     | 453.258186       | L    | 1169.652464 | 585.329870      | 1152.625915    | 576.816596       | 1151.641899    | 576.324588       | 10 |
| 10 | 1036.603724 | 518.805500      | 1019.577175    | 510.292226       | 1018.593159    | 509.800218       | L    | 1056.568400 | 528.787838      | 1039.541851    | 520.274564       | 1038.557835    | 519.782555       | 9  |
| 11 | 1107.640838 | 554.324057      | 1090.614289    | 545.810783       | 1089.630273    | 545.318775       | A    | 943.484336  | 472.245806      | 926.457787     | 463.732531       | 925.473771     | 463.240523       | 8  |
| 12 | 1206.709252 | 603.858264      | 1189.682703    | 595.344990       | 1188.698687    | 594.852982       | V    | 872.447222  | 436.727249      | 855.420673     | 428.213975       | 854.436657     | 427.721967       | 7  |
| 13 | 1335.751845 | 668.379561      | 1318.725296    | 659.866286       | 1317.741280    | 659.374278       | E    | 773.378808  | 387.193042      | 756.352259     | 378.679767       | 755.368243     | 378.187759       | 6  |
| 14 | 1450.778788 | 725.893032      | 1433.752239    | 717.379758       | 1432.768223    | 716.887750       | D    | 644.336215  | 322.671746      | 627.309666     | 314.158471       | 626.325650     | 313.666463       | 5  |
| 15 | 1547.831552 | 774.419414      | 1530.805003    | 765.906140       | 1529.820987    | 765.414132       | P    | 529.309272  | 265.158274      | 512.282723     | 256.644999       | 511.298707     | 256.152991       | 4  |
| 16 | 1676.874145 | 838.940711      | 1659.847596    | 830.427436       | 1658.863580    | 829.935428       | E    | 432.256508  | 216.631892      | 415.229959     | 208.118617       | 414.245943     | 207.626609       | 3  |
| 17 | 1804.969108 | 902.988192      | 1787.942559    | 894.474918       | 1786.958543    | 893.982910       | K    | 303.213915  | 152.110595      | 286.187366     | 143.597321       |                |                  | 2  |
| 18 |             |                 |                |                  |                |                  | R    | 175.118952  | 88.063114       | 158.092403     | 79.549839        |                |                  | 1  |

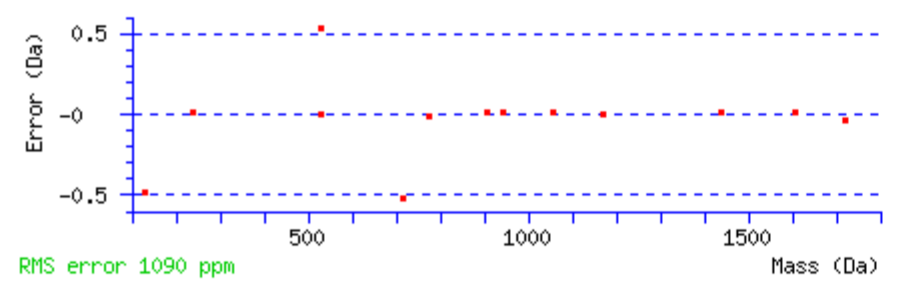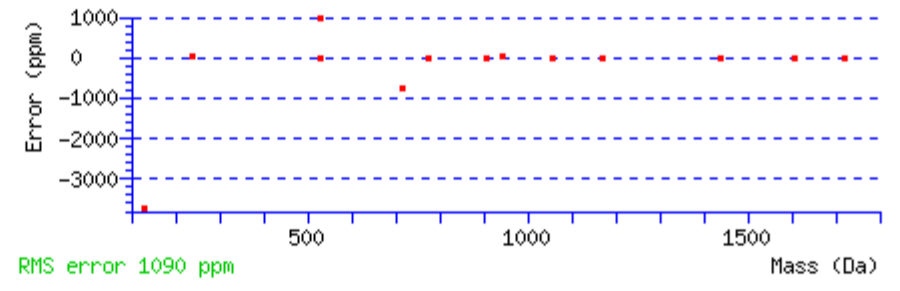

NCBI BLAST search of [EQIPAGTLLAVEDPEKR](#)  
 (Parameters: blastp, nr protein database, expect=20000, no filter, PAM30)  
 Other BLAST [web gateways](#)

**All matches to this query**

| Score | Mr(calc):   | Delta     | Sequence                          |
|-------|-------------|-----------|-----------------------------------|
| 48.1  | 1978.073471 | -0.000389 | <a href="#">EQIPAGTLLAVEDPEKR</a> |
| 2.6   | 1978.082230 | -0.009148 | <a href="#">QTLKAHMIVHSDVKPFK</a> |

**Peptide View**

MS/MS Fragmentation of **QSFTMVADTPENLR**

Found in **LASPI\_HUMAN**, LIM and SH3 domain protein 1 OS=Homo sapiens GN=LASP1 PE=1 SV=2

Match to Query 41049: 1623.768888 from(812.891720,2+) rtinseconds(2310) index(20531)

Title: Locus:1.1.1.2336.46

Data file 2011-11-10 - TFD - EP 4-7.mgf

Click mouse within plot area to zoom in by factor of two about that point

Or, Plot from  to  Da

Label all possible matches  Label matches used for scoring

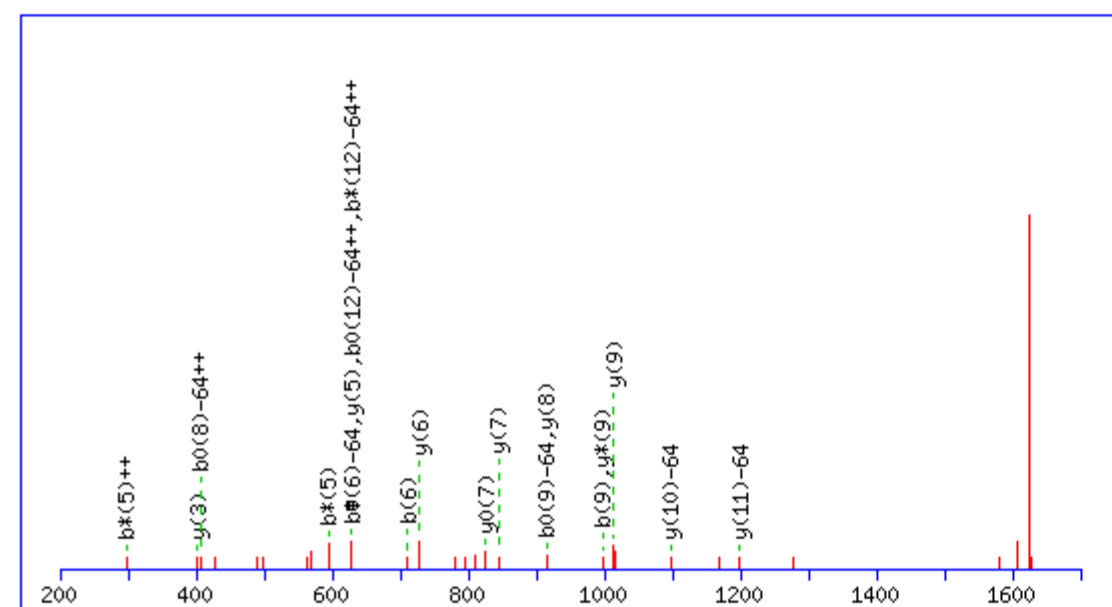

Monoisotopic mass of neutral peptide Mr(calc): 1623.756271

Fixed modifications: Propionamide (C) (apply to specified residues or termini only)

Variable modifications:

M5 : Oxidation (M), with neutral losses 63.998285 (shown in table), 0.000000

Ions Score: 40 Expect: 0.0013

Matches : 20/226 fragment ions using 25 most intense peaks ([help](#))

| #  | b           | b <sup>++</sup> | b <sup>*</sup>    | b <sup>*++</sup>  | b <sup>0</sup>    | b <sup>0++</sup>  | Seq. | y                  | y <sup>++</sup> | y <sup>*</sup>    | y <sup>*++</sup> | y <sup>0</sup>    | y <sup>0++</sup> | #  |
|----|-------------|-----------------|-------------------|-------------------|-------------------|-------------------|------|--------------------|-----------------|-------------------|------------------|-------------------|------------------|----|
| 1  | 129.065854  | 65.036565       | 112.039305        | 56.523291         |                   |                   | Q    |                    |                 |                   |                  |                   |                  | 14 |
| 2  | 216.097882  | 108.552579      | 199.071333        | 100.039305        | 198.087317        | 99.547296         | S    | 1432.706686        | 716.856981      | 1415.680137       | 708.343707       | 1414.696121       | 707.851699       | 13 |
| 3  | 363.166296  | 182.086786      | 346.139747        | 173.573512        | 345.155731        | 173.081504        | F    | 1345.674658        | 673.340967      | 1328.648109       | 664.827693       | 1327.664093       | 664.335684       | 12 |
| 4  | 464.213975  | 232.610626      | 447.187426        | 224.097351        | 446.203410        | 223.605343        | T    | <b>1198.606244</b> | 599.806760      | 1181.579695       | 591.293485       | 1180.595679       | 590.801477       | 11 |
| 5  | 547.251090  | 274.129183      | 530.224541        | 265.615909        | 529.240525        | 265.123901        | M    | <b>1097.558565</b> | 549.282920      | 1080.532016       | 540.769646       | 1079.548000       | 540.277638       | 10 |
| 6  | 646.319504  | 323.663390      | <b>629.292955</b> | 315.150116        | <b>628.308939</b> | 314.658108        | V    | <b>1014.521450</b> | 507.764363      | <b>997.494901</b> | 499.251088       | 996.510885        | 498.759080       | 9  |
| 7  | 717.356618  | 359.181947      | 700.330069        | 350.668673        | 699.346053        | 350.176665        | A    | <b>915.453036</b>  | 458.230156      | 898.426487        | 449.716881       | 897.442471        | 449.224873       | 8  |
| 8  | 832.383561  | 416.695419      | 815.357012        | 408.182144        | 814.372996        | <b>407.690136</b> | D    | <b>844.415922</b>  | 422.711599      | 827.389373        | 414.198324       | <b>826.405357</b> | 413.706316       | 7  |
| 9  | 933.431240  | 467.219258      | 916.404691        | 458.705984        | <b>915.420675</b> | 458.213976        | T    | <b>729.388979</b>  | 365.198127      | 712.362430        | 356.684853       | 711.378414        | 356.192845       | 6  |
| 10 | 1030.484004 | 515.745640      | 1013.457455       | 507.232366        | 1012.473439       | 506.740358        | P    | <b>628.341300</b>  | 314.674288      | 611.314751        | 306.161013       | 610.330735        | 305.669005       | 5  |
| 11 | 1159.526597 | 580.266937      | 1142.500048       | 571.753662        | 1141.516032       | 571.261654        | E    | 531.288536         | 266.147906      | 514.261987        | 257.634631       | 513.277971        | 257.142623       | 4  |
| 12 | 1273.569524 | 637.288400      | 1256.542975       | <b>628.775126</b> | 1255.558959       | <b>628.283118</b> | N    | <b>402.245943</b>  | 201.626609      | 385.219394        | 193.113335       |                   |                  | 3  |
| 13 | 1386.653588 | 693.830432      | 1369.627039       | 685.317158        | 1368.643023       | 684.825149        | L    | 288.203016         | 144.605146      | 271.176467        | 136.091871       |                   |                  | 2  |
| 14 |             |                 |                   |                   |                   |                   | R    | 175.118952         | 88.063114       | 158.092403        | 79.549839        |                   |                  | 1  |

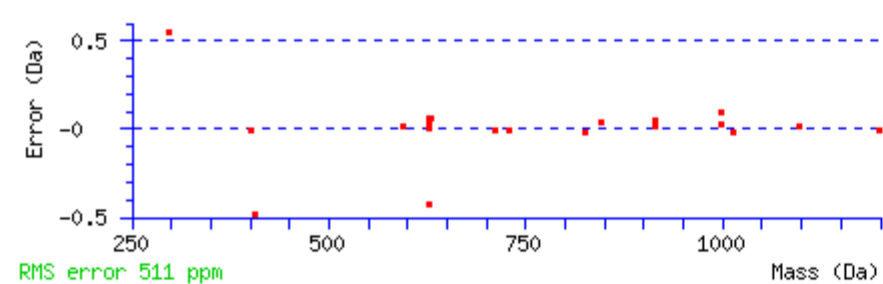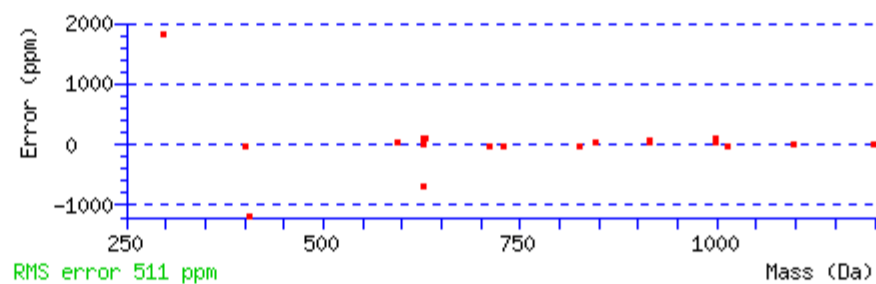

NCBI BLAST search of **QSFTMVADTPENLR**

(Parameters: blastp, nr protein database, expect=20000, no filter, PAM30)

Other BLAST [web gateways](#)

All matches to this query

| Score | Mr(calc):   | Delta    | Sequence              |
|-------|-------------|----------|-----------------------|
| 39.8  | 1623.756271 | 0.012617 | <b>QSFTMVADTPENLR</b> |

# MASCOT Search Results

## Peptide View

### MS/MS Fragmentation of **NAGKLICVR**

Found in **ODB2\_HUMAN**, Lipoamide acyltransferase component of branched-chain alpha-keto acid dehydrogenase complex, mitochondrial OS=Homo sapiens GN=DBT PE=1 SV=3

Match to Query 20027: 1043.582848 from(522.798700,2+) rtinseconds(2687) index(35281)  
 Title: Locus:1.1.1.2461.14  
 Data file 2011-11-10 - TFD - EP 3-2.mgf

Click mouse within plot area to zoom in by factor of two about that point

Or, Plot from  to  Da   
 Label all possible matches  Label matches used for scoring

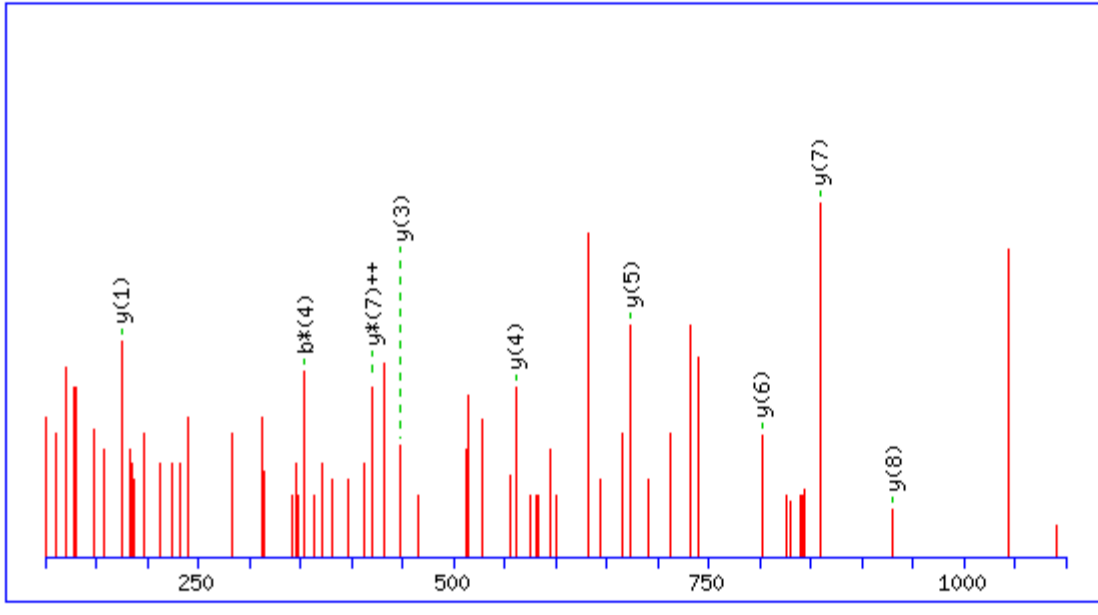

Monoisotopic mass of neutral peptide Mr(calc): 1043.590958  
 Fixed modifications: Propionamide (C) (apply to specified residues or termini only)  
 Ions Score: 33 Expect: 0.0046  
 Matches : 9/64 fragment ions using 26 most intense peaks ([help](#))

| # | b          | b <sup>++</sup> | b <sup>*</sup> | b <sup>*++</sup> | Seq. | y          | y <sup>++</sup> | y <sup>*</sup> | y <sup>*++</sup> | # |
|---|------------|-----------------|----------------|------------------|------|------------|-----------------|----------------|------------------|---|
| 1 | 115.050203 | 58.028740       | 98.023654      | 49.515465        | N    |            |                 |                |                  | 9 |
| 2 | 186.087317 | 93.547296       | 169.060768     | 85.034022        | A    | 930.555334 | 465.781305      | 913.528785     | 457.268031       | 8 |
| 3 | 243.108781 | 122.058028      | 226.082232     | 113.544754       | G    | 859.518220 | 430.262748      | 842.491671     | 421.749474       | 7 |
| 4 | 371.203744 | 186.105510      | 354.177195     | 177.592235       | K    | 802.496756 | 401.752016      | 785.470207     | 393.238742       | 6 |
| 5 | 484.287808 | 242.647542      | 467.261259     | 234.134267       | L    | 674.401793 | 337.704535      | 657.375244     | 329.191260       | 5 |
| 6 | 597.371872 | 299.189574      | 580.345323     | 290.676300       | I    | 561.317729 | 281.162503      | 544.291180     | 272.649228       | 4 |
| 7 | 771.418171 | 386.212724      | 754.391622     | 377.699449       | C    | 448.233665 | 224.620470      | 431.207116     | 216.107196       | 3 |
| 8 | 870.486585 | 435.746931      | 853.460036     | 427.233656       | V    | 274.187366 | 137.597321      | 257.160817     | 129.084047       | 2 |
| 9 |            |                 |                |                  | R    | 175.118952 | 88.063114       | 158.092403     | 79.549840        | 1 |

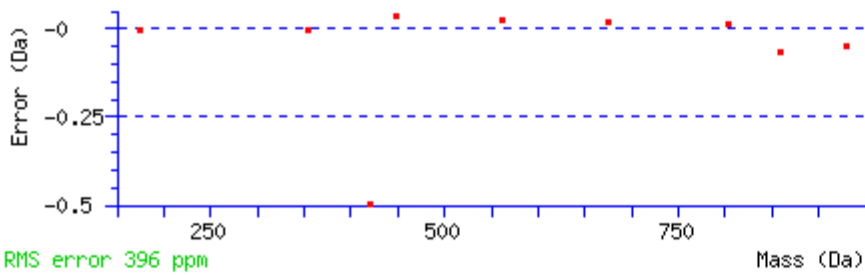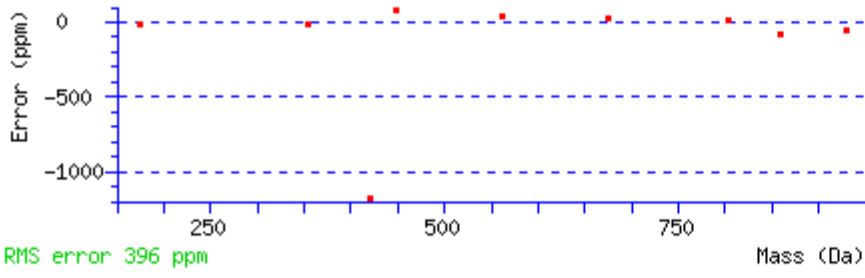

NCBI BLAST search of [NAGKLICVR](#)  
 (Parameters: blastp, nr protein database, expect=20000, no filter, PAM30)  
 Other BLAST [web gateways](#)

### All matches to this query

| Score | Mr(calc):   | Delta     | Sequence                   |
|-------|-------------|-----------|----------------------------|
| 32.6  | 1043.590958 | -0.008110 | <a href="#">NAGKLICVR</a>  |
| 7.3   | 1043.586258 | -0.003410 | <a href="#">QEIVLDSK</a>   |
| 3.3   | 1043.576370 | 0.006478  | <a href="#">KGGADWLGLK</a> |
| 3.3   | 1043.576355 | 0.006493  | <a href="#">LLSWLQER</a>   |
| 2.8   | 1043.579727 | 0.003121  | <a href="#">NKPKMVPSK</a>  |
| 1.8   | 1043.579727 | 0.003121  | <a href="#">NKPKMVPSK</a>  |
| 1.6   | 1043.576370 | 0.006478  | <a href="#">SYAGVAVIHK</a> |

# **Mascot Search Results**

## Peptide View

MS/MS Fragmentation of **LSTSPDEPVPR**

Found in **S27A6\_HUMAN**, Long-chain fatty acid transport protein 6 OS=Homo sapiens GN=SLC27A6 PE=1 SV=1

Match to Query 34659: 1228.591568 from(615.303060,2+) rtinseconds(2105) index(22945)

Title: Locus:1.1.1.2020.38

Data file 2011-11-12 - TFD - EP 5-6.mgf

Click mouse within plot area to zoom in by factor of two about that point

Or, Plot from  to  Da

Label all possible matches  Label matches used for scoring

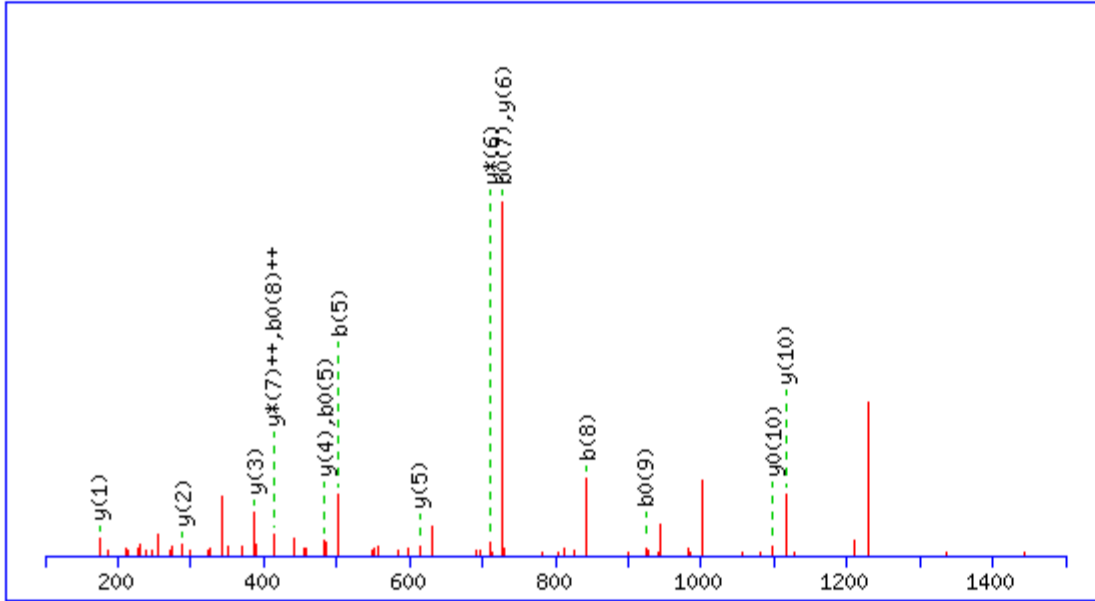

Monoisotopic mass of neutral peptide Mr(calc): 1228.593552

Fixed modifications: Propionamide (C) (apply to specified residues or termini only)

Variable modifications:

P5 : Oxidation (P)

P10 : Oxidation (P)

Ions Score: 51 Expect: 5.7e-005

Matches : 16/90 fragment ions using 21 most intense peaks [\(help\)](#)

| #  | b                 | b <sup>++</sup> | b <sup>0</sup>    | b <sup>0++</sup>  | Seq. | y                  | y <sup>++</sup> | y <sup>*</sup>    | y <sup>++</sup>   | y <sup>0</sup>     | y <sup>0++</sup> | #  |
|----|-------------------|-----------------|-------------------|-------------------|------|--------------------|-----------------|-------------------|-------------------|--------------------|------------------|----|
| 1  | 114.091340        | 57.549308       |                   |                   | L    |                    |                 |                   |                   |                    |                  | 11 |
| 2  | 201.123368        | 101.065322      | 183.112803        | 92.060039         | S    | <b>1116.516759</b> | 558.762018      | 1099.490210       | 550.248743        | <b>1098.506194</b> | 549.756735       | 10 |
| 3  | 302.171047        | 151.589161      | 284.160482        | 142.583879        | T    | 1029.484731        | 515.246004      | 1012.458182       | 506.732729        | 1011.474166        | 506.240721       | 9  |
| 4  | 389.203075        | 195.105175      | 371.192510        | 186.099893        | S    | 928.437052         | 464.722164      | 911.410503        | 456.208890        | 910.426487         | 455.716882       | 8  |
| 5  | <b>502.250754</b> | 251.629015      | <b>484.240189</b> | 242.623732        | P    | 841.405024         | 421.206150      | 824.378475        | <b>412.692876</b> | 823.394459         | 412.200868       | 7  |
| 6  | 617.277697        | 309.142487      | 599.267132        | 300.137204        | D    | <b>728.357345</b>  | 364.682311      | <b>711.330796</b> | 356.169036        | 710.346780         | 355.677028       | 6  |
| 7  | 746.320290        | 373.663783      | <b>728.309725</b> | 364.658501        | E    | <b>613.330402</b>  | 307.168839      | 596.303853        | 298.655565        | 595.319837         | 298.163557       | 5  |
| 8  | <b>843.373054</b> | 422.190165      | 825.362489        | <b>413.184883</b> | P    | <b>484.287809</b>  | 242.647542      | 467.261260        | 234.134268        |                    |                  | 4  |
| 9  | 942.441468        | 471.724372      | <b>924.430903</b> | 462.719090        | V    | <b>387.235045</b>  | 194.121160      | 370.208496        | 185.607886        |                    |                  | 3  |
| 10 | 1055.489147       | 528.248212      | 1037.478582       | 519.242929        | P    | <b>288.166631</b>  | 144.586953      | 271.140082        | 136.073679        |                    |                  | 2  |
| 11 |                   |                 |                   |                   | R    | <b>175.118952</b>  | 88.063114       | 158.092403        | 79.549839         |                    |                  | 1  |

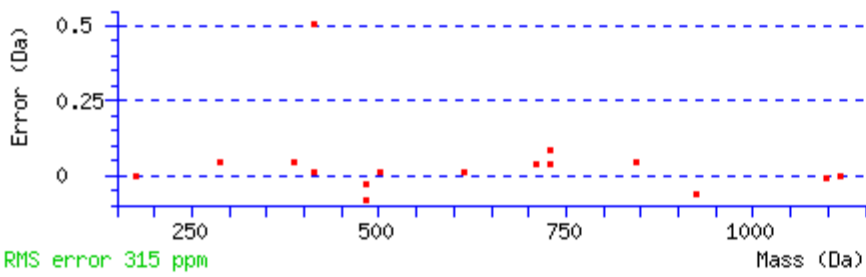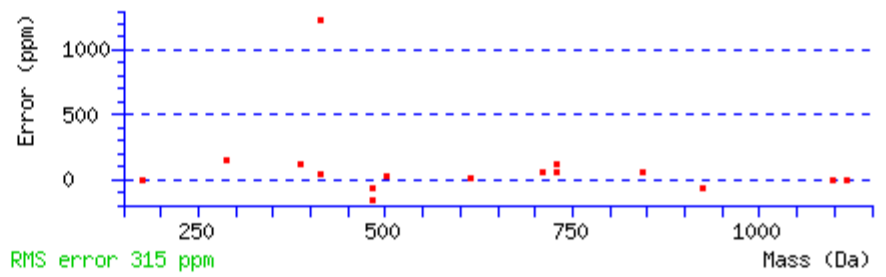

NCBI BLAST search of [LSTSPDEPVPR](#)

(Parameters: blastp, nr protein database, expect=20000, no filter, PAM30)

Other BLAST [web gateways](#)

All matches to this query

| Score | Mr(calc):   | Delta     | Sequence                    |
|-------|-------------|-----------|-----------------------------|
| 51.5  | 1228.593552 | -0.001984 | <a href="#">LSTSPDEPVPR</a> |
| 26.4  | 1228.593552 | -0.001984 | <a href="#">LSTSPDEPVPR</a> |
| 10.6  | 1228.593552 | -0.001984 | <a href="#">LSTSPDEPVPR</a> |
| 5.8   | 1228.587006 | 0.004562  | <a href="#">EHLNSMVVER</a>  |
| 4.7   | 1228.593521 | -0.001953 | <a href="#">VEAEPAEVTER</a> |
| 4.5   | 1228.598236 | -0.006668 | <a href="#">INVMNDRDPR</a>  |
| 4.4   | 1228.582291 | 0.009277  | <a href="#">LEAPDADELPK</a> |
| 2.0   | 1228.593521 | -0.001953 | <a href="#">EGSKDNPEPLK</a> |
| 1.1   | 1228.593521 | -0.001953 | <a href="#">DLEAESSPLR</a>  |
| 1.0   | 1228.580475 | 0.011093  | <a href="#">LNCRPCPPR</a>   |

# MASCOT Search Results

## Peptide View

MS/MS Fragmentation of **AKPTSDKPGSPYR**

Found in **ACSL4\_HUMAN**, Long-chain-fatty-acid--CoA ligase 4 OS=Homo sapiens GN=ACSL4 PE=1 SV=2

Match to Query 751243: 1402.718412 from(468.580080,3+) rtinseconds(777) index(656683)

Title: Locus:1.1.1.959.5

Data file C:\Program Files (x86)\Matrix Science\Mascot Daemon\mgf3 TFD - Epitel - R2\mascot\_daemon\_merge.mgf

Click mouse within plot area to zoom in by factor of two about that point

Or, Plot from  to  Da

Label all possible matches  Label matches used for scoring

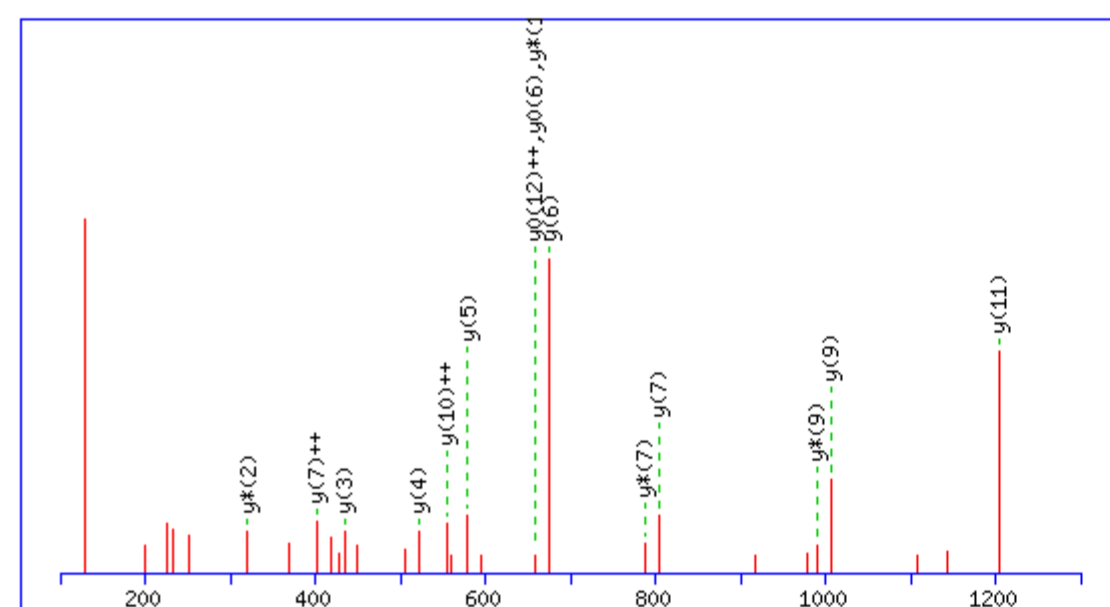

Monoisotopic mass of neutral peptide Mr(calc): 1402.720459

Fixed modifications: Carbamidomethyl (C) (apply to specified residues or termini only)

Ions Score: 49 Expect: 4.9e-005

Matches : 15/130 fragment ions using 20 most intense peaks [\(help\)](#)

| #  | b           | b <sup>++</sup> | b <sup>*</sup> | b <sup>*++</sup> | b <sup>0</sup> | b <sup>0++</sup> | Seq. | y           | y <sup>++</sup> | y <sup>*</sup> | y <sup>*++</sup> | y <sup>0</sup> | y <sup>0++</sup> | #  |
|----|-------------|-----------------|----------------|------------------|----------------|------------------|------|-------------|-----------------|----------------|------------------|----------------|------------------|----|
| 1  | 72.044390   | 36.525833       |                |                  |                |                  | A    |             |                 |                |                  |                |                  | 13 |
| 2  | 200.139353  | 100.573315      | 183.112804     | 92.060040        |                |                  | K    | 1332.690641 | 666.848959      | 1315.664092    | 658.335684       | 1314.680076    | 657.843676       | 12 |
| 3  | 297.192117  | 149.099696      | 280.165568     | 140.586422       |                |                  | P    | 1204.595678 | 602.801477      | 1187.569129    | 594.288203       | 1186.585113    | 593.796195       | 11 |
| 4  | 398.239796  | 199.623536      | 381.213247     | 191.110262       | 380.229231     | 190.618254       | T    | 1107.542914 | 554.275095      | 1090.516365    | 545.761821       | 1089.532349    | 545.269813       | 10 |
| 5  | 485.271824  | 243.139550      | 468.245275     | 234.626275       | 467.261259     | 234.134267       | S    | 1006.495235 | 503.751256      | 989.468686     | 495.237981       | 988.484670     | 494.745973       | 9  |
| 6  | 600.298767  | 300.653022      | 583.272218     | 292.139747       | 582.288202     | 291.647739       | D    | 919.463207  | 460.235242      | 902.436658     | 451.721967       | 901.452642     | 451.229959       | 8  |
| 7  | 728.393730  | 364.700503      | 711.367181     | 356.187229       | 710.383165     | 355.695221       | K    | 804.436264  | 402.721770      | 787.409715     | 394.208496       | 786.425699     | 393.716488       | 7  |
| 8  | 825.446494  | 413.226885      | 808.419945     | 404.713611       | 807.435929     | 404.221603       | P    | 676.341301  | 338.674289      | 659.314752     | 330.161014       | 658.330736     | 329.669006       | 6  |
| 9  | 882.467958  | 441.737617      | 865.441409     | 433.224343       | 864.457393     | 432.732335       | G    | 579.288537  | 290.147907      | 562.261988     | 281.634632       | 561.277972     | 281.142624       | 5  |
| 10 | 969.499986  | 485.253631      | 952.473437     | 476.740357       | 951.489421     | 476.248349       | S    | 522.267073  | 261.637175      | 505.240524     | 253.123900       | 504.256508     | 252.631892       | 4  |
| 11 | 1066.552750 | 533.780013      | 1049.526201    | 525.266739       | 1048.542185    | 524.774731       | P    | 435.235045  | 218.121161      | 418.208496     | 209.607886       |                |                  | 3  |
| 12 | 1229.616079 | 615.311678      | 1212.589530    | 606.798403       | 1211.605514    | 606.306395       | Y    | 338.182281  | 169.594778      | 321.155732     | 161.081504       |                |                  | 2  |
| 13 |             |                 |                |                  |                |                  | R    | 175.118952  | 88.063114       | 158.092403     | 79.549839        |                |                  | 1  |

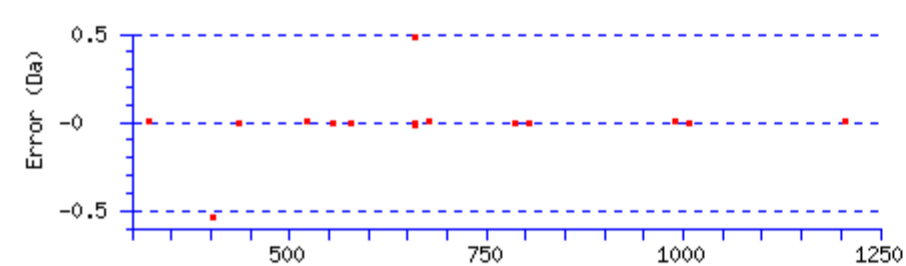

RMS error 391 ppm

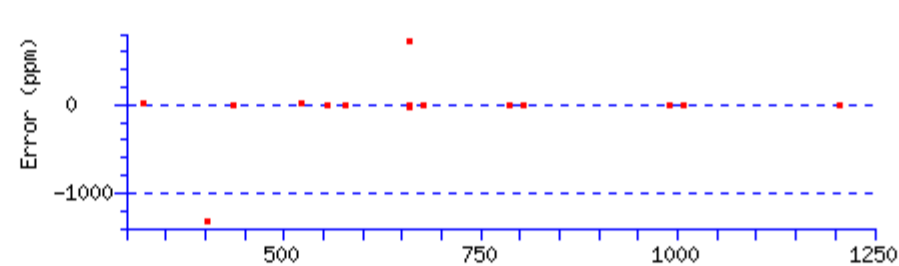

RMS error 391 ppm

NCBI BLAST search of **AKPTSDKPGSPYR**

(Parameters: blastp, nr protein database, expect=20000, no filter, PAM30)

Other BLAST [web gateways](#)

All matches to this query

| Score | Mr(calc):   | Delta     | Sequence                      |
|-------|-------------|-----------|-------------------------------|
| 49.3  | 1402.720459 | -0.002047 | <a href="#">AKPTSDKPGSPYR</a> |
| 3.2   | 1402.719147 | -0.000735 | <a href="#">TGPEDTTVLIETK</a> |
| 1.5   | 1402.723831 | -0.005419 | <a href="#">SLSGCPLADKSLR</a> |
| 0.6   | 1402.720459 | -0.002047 | <a href="#">QALNITPEQFSR</a>  |

Mascot: <http://www.matrixscience.com/>



# MASCOT Search Results

## Peptide View

MS/MS Fragmentation of **SLVATGNLLDLEETAK**

Found in **ARH\_HUMAN**, Low density lipoprotein receptor adapter protein 1 OS=Homo sapiens GN=LDLRAP1 PE=1 SV=3

Match to Query 53740: 1672.893588 from(837.454070,2+) rtinseconds(3209) index(45465)

Title: Locus:1.1.1.2562.46

Data file 2011-11-10 - TFD - EP 3-4.mgf

Click mouse within plot area to zoom in by factor of two about that point

Or, Plot from  to  Da

Label all possible matches  Label matches used for scoring

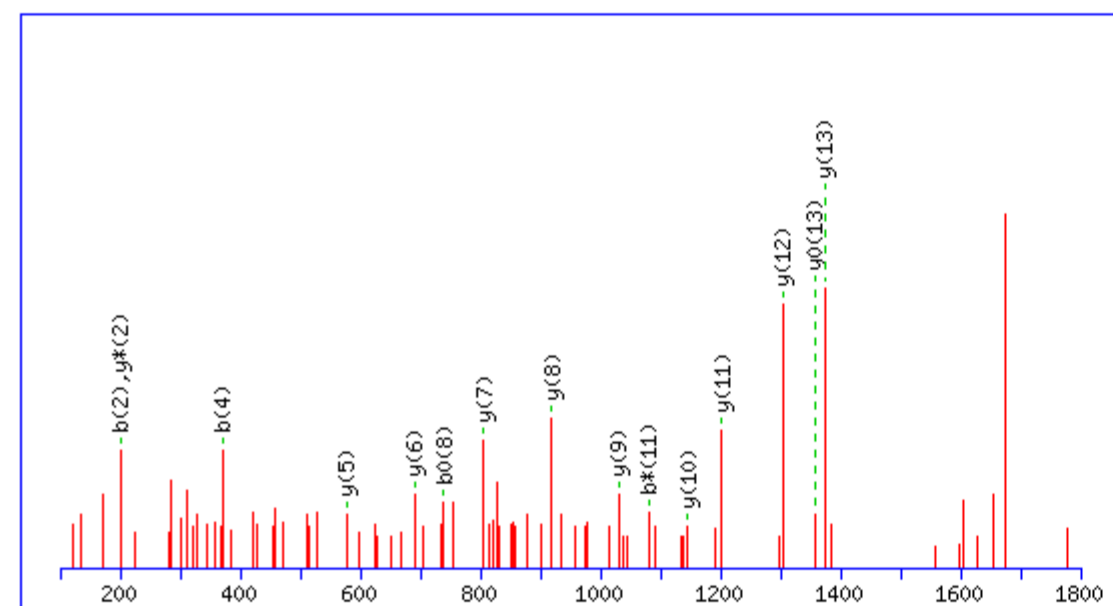

Monoisotopic mass of neutral peptide Mr(calc): 1672.888306

Fixed modifications: Propionamide (C) (apply to specified residues or termini only)

Ions Score: 53 Expect: 4.6e-005

Matches : 15/164 fragment ions using 30 most intense peaks [\(help\)](#)

| #  | b                 | b <sup>++</sup> | b <sup>*</sup>     | b <sup>*++</sup> | b <sup>0</sup>    | b <sup>0++</sup> | Seq. | y                  | y <sup>++</sup> | y <sup>*</sup>    | y <sup>*++</sup> | y <sup>0</sup>     | y <sup>0++</sup> | #  |
|----|-------------------|-----------------|--------------------|------------------|-------------------|------------------|------|--------------------|-----------------|-------------------|------------------|--------------------|------------------|----|
| 1  | 88.039304         | 44.523290       |                    |                  | 70.028739         | 35.518008        | S    |                    |                 |                   |                  |                    |                  | 16 |
| 2  | <b>201.123368</b> | 101.065322      |                    |                  | 183.112803        | 92.060039        | L    | 1586.863580        | 793.935428      | 1569.837031       | 785.422154       | 1568.853015        | 784.930145       | 15 |
| 3  | 300.191782        | 150.599529      |                    |                  | 282.181217        | 141.594247       | V    | 1473.779516        | 737.393396      | 1456.752967       | 728.880122       | 1455.768951        | 728.388114       | 14 |
| 4  | <b>371.228896</b> | 186.118086      |                    |                  | 353.218331        | 177.112804       | A    | <b>1374.711102</b> | 687.859189      | 1357.684553       | 679.345915       | <b>1356.700537</b> | 678.853906       | 13 |
| 5  | 472.276575        | 236.641926      |                    |                  | 454.266010        | 227.636643       | T    | <b>1303.673988</b> | 652.340632      | 1286.647439       | 643.827358       | 1285.663423        | 643.335350       | 12 |
| 6  | 529.298039        | 265.152658      |                    |                  | 511.287474        | 256.147375       | G    | <b>1202.626309</b> | 601.816793      | 1185.599760       | 593.303518       | 1184.615744        | 592.811510       | 11 |
| 7  | 643.340966        | 322.174121      | 626.314417         | 313.660847       | 625.330401        | 313.168839       | N    | <b>1145.604845</b> | 573.306061      | 1128.578296       | 564.792786       | 1127.594280        | 564.300778       | 10 |
| 8  | 756.425030        | 378.716153      | 739.398481         | 370.202879       | <b>738.414465</b> | 369.710871       | L    | <b>1031.561918</b> | 516.284597      | 1014.535369       | 507.771323       | 1013.551353        | 507.279315       | 9  |
| 9  | 869.509094        | 435.258185      | 852.482545         | 426.744911       | 851.498529        | 426.252903       | L    | <b>918.477854</b>  | 459.742565      | 901.451305        | 451.229290       | 900.467289         | 450.737282       | 8  |
| 10 | 984.536037        | 492.771657      | 967.509488         | 484.258382       | 966.525472        | 483.766374       | D    | <b>805.393790</b>  | 403.200533      | 788.367241        | 394.687258       | 787.383225         | 394.195250       | 7  |
| 11 | 1097.620101       | 549.313689      | <b>1080.593552</b> | 540.800414       | 1079.609536       | 540.308406       | L    | <b>690.366847</b>  | 345.687062      | 673.340298        | 337.173787       | 672.356282         | 336.681779       | 6  |
| 12 | 1226.662694       | 613.834985      | 1209.636145        | 605.321710       | 1208.652129       | 604.829702       | E    | <b>577.282783</b>  | 289.145030      | 560.256234        | 280.631755       | 559.272218         | 280.139747       | 5  |
| 13 | 1355.705287       | 678.356282      | 1338.678738        | 669.843007       | 1337.694722       | 669.350999       | E    | 448.240190         | 224.623733      | 431.213641        | 216.110459       | 430.229625         | 215.618451       | 4  |
| 14 | 1456.752966       | 728.880121      | 1439.726417        | 720.366847       | 1438.742401       | 719.874839       | T    | 319.197597         | 160.102436      | 302.171048        | 151.589162       | 301.187032         | 151.097154       | 3  |
| 15 | 1527.790080       | 764.398678      | 1510.763531        | 755.885404       | 1509.779515       | 755.393396       | A    | 218.149918         | 109.578597      | <b>201.123369</b> | 101.065322       |                    |                  | 2  |
| 16 |                   |                 |                    |                  |                   |                  | K    | 147.112804         | 74.060040       | 130.086255        | 65.546765        |                    |                  | 1  |

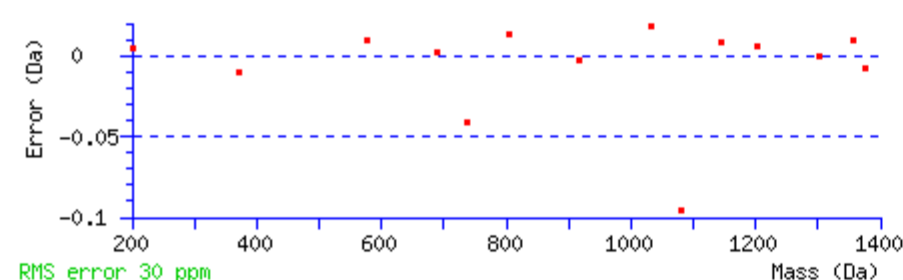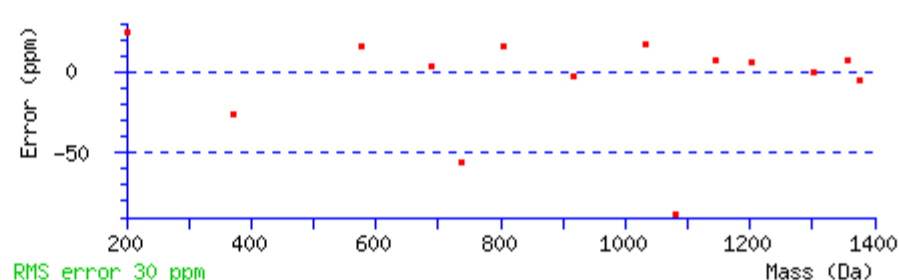

NCBI BLAST search of [SLVATGNLLDLEETAK](#)

(Parameters: blastp, nr protein database, expect=20000, no filter, PAM30)

Other BLAST [web gateways](#)

All matches to this query

| Score | Mr(calc):   | Delta    | Sequence                         |
|-------|-------------|----------|----------------------------------|
| 53.3  | 1672.888306 | 0.005282 | <a href="#">SLVATGNLLDLEETAK</a> |
| 7.4   | 1672.881790 | 0.011798 | <a href="#">AIDATLMSPRGIAVDK</a> |
| 2.4   | 1672.881790 | 0.011798 | <a href="#">AIDATLMSPRGIAVDK</a> |

Mascot: <http://www.matrixscience.com/>

# MASCOT Search Results

## Peptide View

MS/MS Fragmentation of **SVLFVCLGNICR**

Found in **PPAC\_HUMAN**, Low molecular weight phosphotyrosine protein phosphatase OS=Homo sapiens GN=ACP1 PE=1 SV=3

Match to Query 41240: 1436.713308 from(719.363930,2+) rtinseconds(3284) index(46745)

Title: Locus:1.1.1.1690.25

Data file 2012-01-27 - TFD - Epitel - IEC - 10ul - 3.mgf

Click mouse within plot area to zoom in by factor of two about that point

Or, Plot from  to  Da

Label all possible matches  Label matches used for scoring

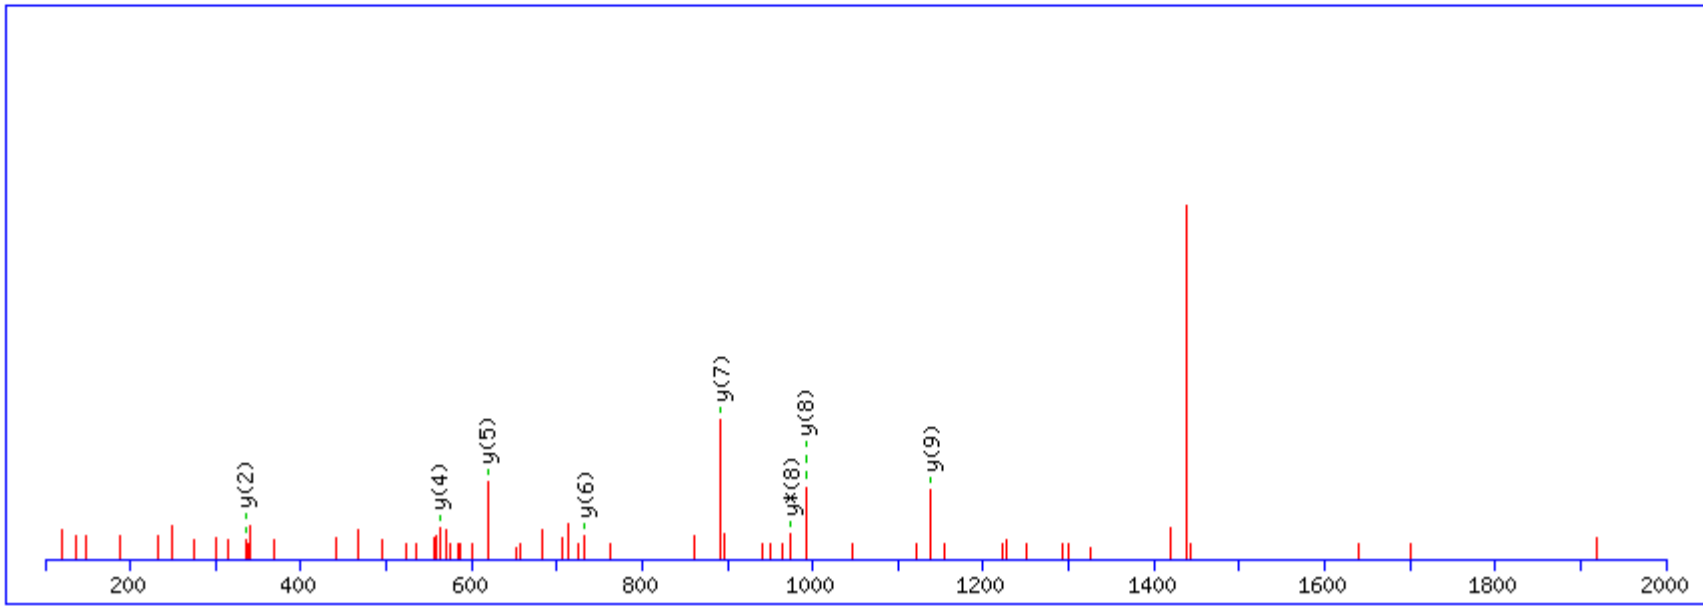

Monoisotopic mass of neutral peptide Mr(calc): 1436.726837

Fixed modifications: Carbamidomethyl (C) (apply to specified residues or termini only)

Ions Score: 31 Expect: 0.0018

Matches : 8/94 fragment ions using 25 most intense peaks ([help](#))

| #  | b           | b <sup>++</sup> | b <sup>*</sup> | b <sup>*++</sup> | b <sup>0</sup> | b <sup>0++</sup> | Seq. | y                  | y <sup>++</sup> | y <sup>*</sup>    | y <sup>*++</sup> | #  |
|----|-------------|-----------------|----------------|------------------|----------------|------------------|------|--------------------|-----------------|-------------------|------------------|----|
| 1  | 88.039304   | 44.523290       |                |                  | 70.028739      | 35.518008        | S    |                    |                 |                   |                  | 12 |
| 2  | 187.107718  | 94.057497       |                |                  | 169.097153     | 85.052214        | V    | 1350.702075        | 675.854675      | 1333.675526       | 667.341401       | 11 |
| 3  | 300.191782  | 150.599529      |                |                  | 282.181217     | 141.594247       | L    | 1251.633661        | 626.320469      | 1234.607112       | 617.807194       | 10 |
| 4  | 447.260196  | 224.133736      |                |                  | 429.249631     | 215.128454       | F    | <b>1138.549597</b> | 569.778437      | 1121.523048       | 561.265162       | 9  |
| 5  | 546.328610  | 273.667943      |                |                  | 528.318045     | 264.662661       | V    | <b>991.481183</b>  | 496.244230      | <b>974.454634</b> | 487.730955       | 8  |
| 6  | 706.359259  | 353.683268      |                |                  | 688.348694     | 344.677985       | C    | <b>892.412769</b>  | 446.710023      | 875.386220        | 438.196748       | 7  |
| 7  | 819.443323  | 410.225300      |                |                  | 801.432758     | 401.220017       | L    | <b>732.382120</b>  | 366.694698      | 715.355571        | 358.181423       | 6  |
| 8  | 876.464787  | 438.736032      |                |                  | 858.454222     | 429.730749       | G    | <b>619.298056</b>  | 310.152666      | 602.271507        | 301.639391       | 5  |
| 9  | 990.507714  | 495.757495      | 973.481165     | 487.244221       | 972.497149     | 486.752213       | N    | <b>562.276592</b>  | 281.641934      | 545.250043        | 273.128659       | 4  |
| 10 | 1103.591778 | 552.299527      | 1086.565229    | 543.786253       | 1085.581213    | 543.294244       | I    | 448.233665         | 224.620470      | 431.207116        | 216.107196       | 3  |
| 11 | 1263.622427 | 632.314852      | 1246.595878    | 623.801577       | 1245.611862    | 623.309569       | C    | <b>335.149601</b>  | 168.078438      | 318.123052        | 159.565164       | 2  |
| 12 |             |                 |                |                  |                |                  | R    | 175.118952         | 88.063114       | 158.092403        | 79.549839        | 1  |

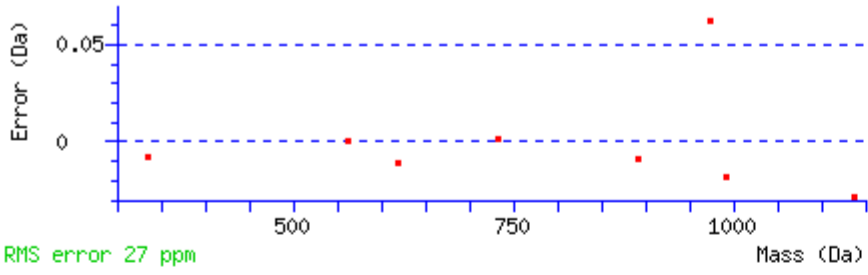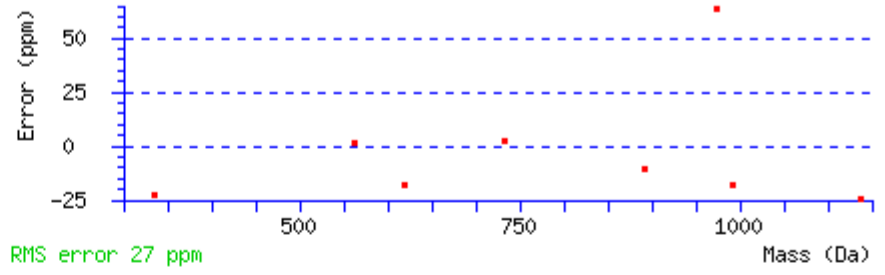

NCBI BLAST search of **SVLFVCLGNICR**

(Parameters: blastp, nr protein database, expect=20000, no filter, PAM30)

Other BLAST [web gateways](#)

All matches to this query

| Score | Mr(calc):   | Delta     | Sequence                      |
|-------|-------------|-----------|-------------------------------|
| 31.1  | 1436.726837 | -0.013529 | <a href="#">SVLFVCLGNICR</a>  |
| 1.8   | 1436.704376 | 0.008932  | <a href="#">MPPGIGNTFLIVM</a> |
| 1.8   | 1436.704376 | 0.008932  | <a href="#">MPPGIGNTFLIVM</a> |

Mascot: <http://www.matrixscience.com/>

# Mascot Search Results

## Peptide View

MS/MS Fragmentation of **TQADLDSLVR**

Found in **DCXR\_HUMAN**, L-xylulose reductase OS=Homo sapiens GN=DCXR PE=1 SV=2

Match to Query 16208: 1116.587008 from(559.300780,2+) rtinseconds(2064) index(23922)

Title: Locus:1.1.1.1168.13

Data file 2012-01-27 - TFD - Epitel - IEC - 10ul - 2.mgf

Click mouse within plot area to zoom in by factor of two about that point

Or, Plot from  to  Da

Label all possible matches  Label matches used for scoring

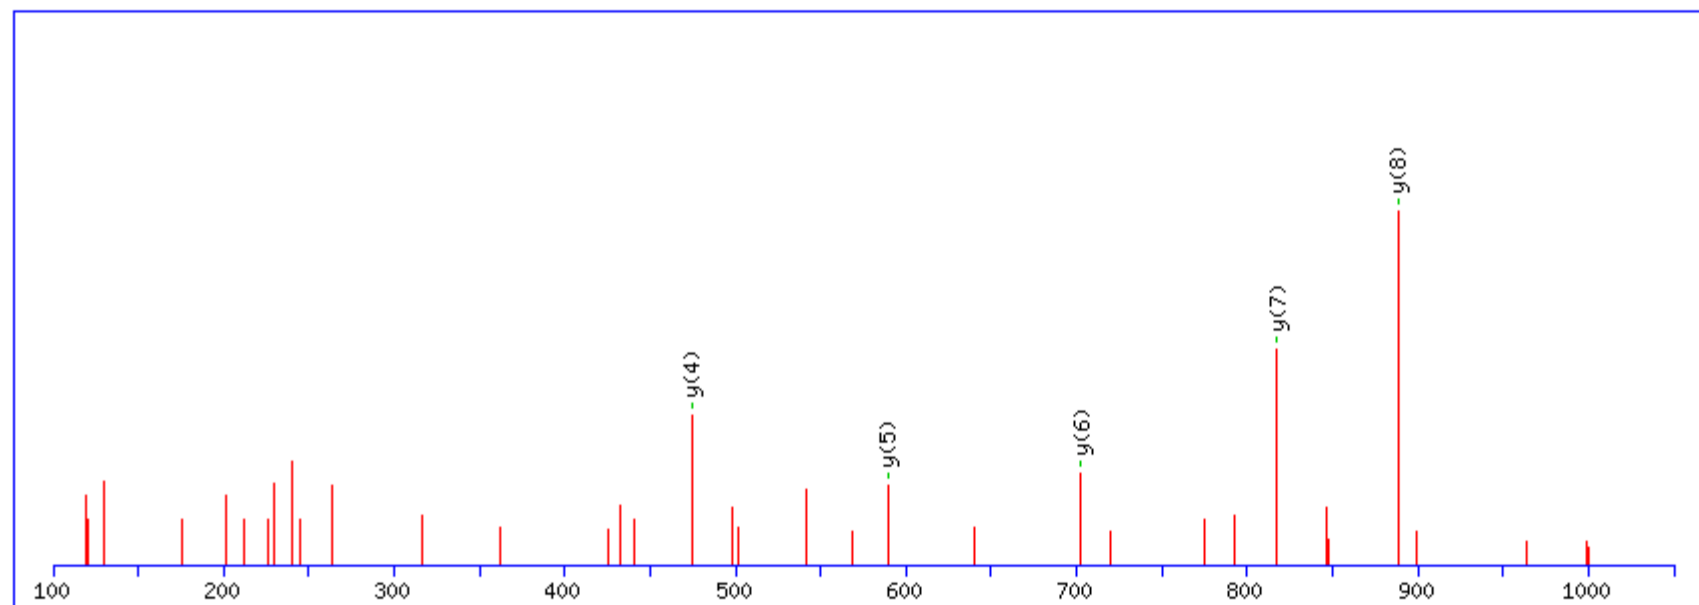

Monoisotopic mass of neutral peptide Mr(calc): 1116.577499

Fixed modifications: Carbamidomethyl (C) (apply to specified residues or termini only)

Ions Score: 32 Expect: 0.005

Matches : 5/100 fragment ions using 9 most intense peaks [\(help\)](#)

| #  | b          | b <sup>++</sup> | b <sup>*</sup> | b <sup>*++</sup> | b <sup>0</sup> | b <sup>0++</sup> | Seq. | y           | y <sup>++</sup> | y <sup>*</sup> | y <sup>*++</sup> | y <sup>0</sup> | y <sup>0++</sup> | #  |
|----|------------|-----------------|----------------|------------------|----------------|------------------|------|-------------|-----------------|----------------|------------------|----------------|------------------|----|
| 1  | 102.054955 | 51.531116       |                |                  | 84.044390      | 42.525833        | T    |             |                 |                |                  |                |                  | 10 |
| 2  | 230.113533 | 115.560405      | 213.086984     | 107.047130       | 212.102968     | 106.555122       | Q    | 1016.537100 | 508.772188      | 999.510551     | 500.258914       | 998.526535     | 499.766906       | 9  |
| 3  | 301.150647 | 151.078961      | 284.124098     | 142.565687       | 283.140082     | 142.073679       | A    | 888.478522  | 444.742899      | 871.451973     | 436.229625       | 870.467957     | 435.737617       | 8  |
| 4  | 416.177590 | 208.592433      | 399.151041     | 200.079159       | 398.167025     | 199.587151       | D    | 817.441408  | 409.224342      | 800.414859     | 400.711068       | 799.430843     | 400.219060       | 7  |
| 5  | 529.261654 | 265.134465      | 512.235105     | 256.621191       | 511.251089     | 256.129183       | L    | 702.414465  | 351.710871      | 685.387916     | 343.197596       | 684.403900     | 342.705588       | 6  |
| 6  | 644.288597 | 322.647937      | 627.262048     | 314.134662       | 626.278032     | 313.642654       | D    | 589.330401  | 295.168839      | 572.303852     | 286.655564       | 571.319836     | 286.163556       | 5  |
| 7  | 731.320625 | 366.163951      | 714.294076     | 357.650676       | 713.310060     | 357.158668       | S    | 474.303458  | 237.655367      | 457.276909     | 229.142092       | 456.292893     | 228.650084       | 4  |
| 8  | 844.404689 | 422.705983      | 827.378140     | 414.192708       | 826.394124     | 413.700700       | L    | 387.271430  | 194.139353      | 370.244881     | 185.626079       |                |                  | 3  |
| 9  | 943.473103 | 472.240189      | 926.446554     | 463.726915       | 925.462538     | 463.234907       | V    | 274.187366  | 137.597321      | 257.160817     | 129.084047       |                |                  | 2  |
| 10 |            |                 |                |                  |                |                  | R    | 175.118952  | 88.063114       | 158.092403     | 79.549840        |                |                  | 1  |

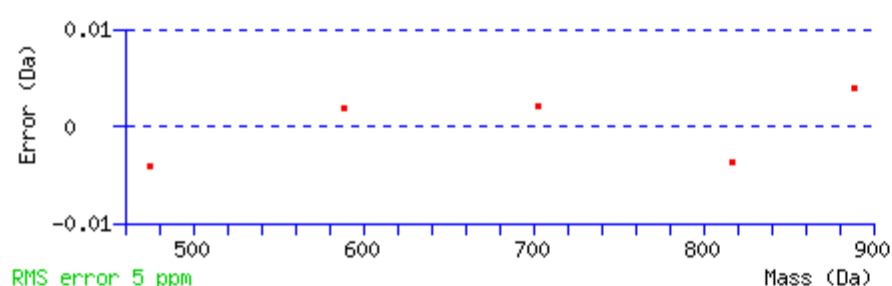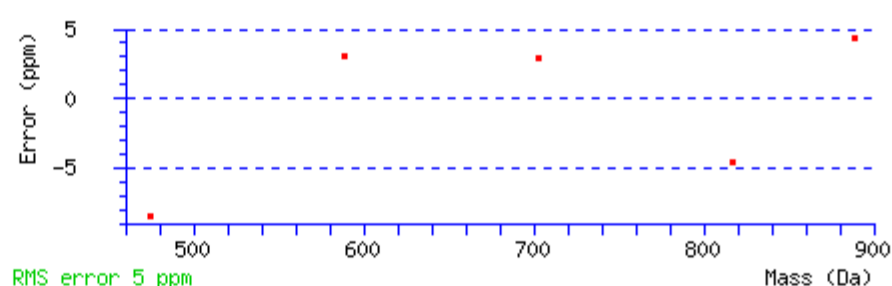

NCBI BLAST search of [TQADLDSLVR](#)

(Parameters: blastp, nr protein database, expect=20000, no filter, PAM30)

Other BLAST [web gateways](#)

All matches to this query

| Score | Mr(calc):   | Delta     | Sequence                    |
|-------|-------------|-----------|-----------------------------|
| 31.8  | 1116.577499 | 0.009509  | <a href="#">TQADLDSLVR</a>  |
| 6.8   | 1116.584885 | 0.002123  | <a href="#">NGLMLPTDIK</a>  |
| 4.7   | 1116.596115 | -0.009107 | <a href="#">ECVSILPRK</a>   |
| 2.7   | 1116.584885 | 0.002123  | <a href="#">QTLAPEVKTM</a>  |
| 1.2   | 1116.584869 | 0.002139  | <a href="#">EAASNGVLLLM</a> |
| 0.8   | 1116.592743 | -0.005735 | <a href="#">QTAFPNALQK</a>  |

# MASCOT Search Results

## Peptide View

MS/MS Fragmentation of **EIVYPFQGDSTVTK**

Found in **LYPD2\_HUMAN**, Ly6/PLAUR domain-containing protein 2 OS=Homo sapiens GN=LYPD2 PE=2 SV=1

Match to Query 52743: 1582.786088 from(792.400320,2+) rtinseconds(2656) index(32976)

Title: Locus:1.1.1.2269.47

Data file 2011-11-10 - TFD - EP 4-6.mgf

Click mouse within plot area to zoom in by factor of two about that point

Or, Plot from  to  Da

Label all possible matches  Label matches used for scoring

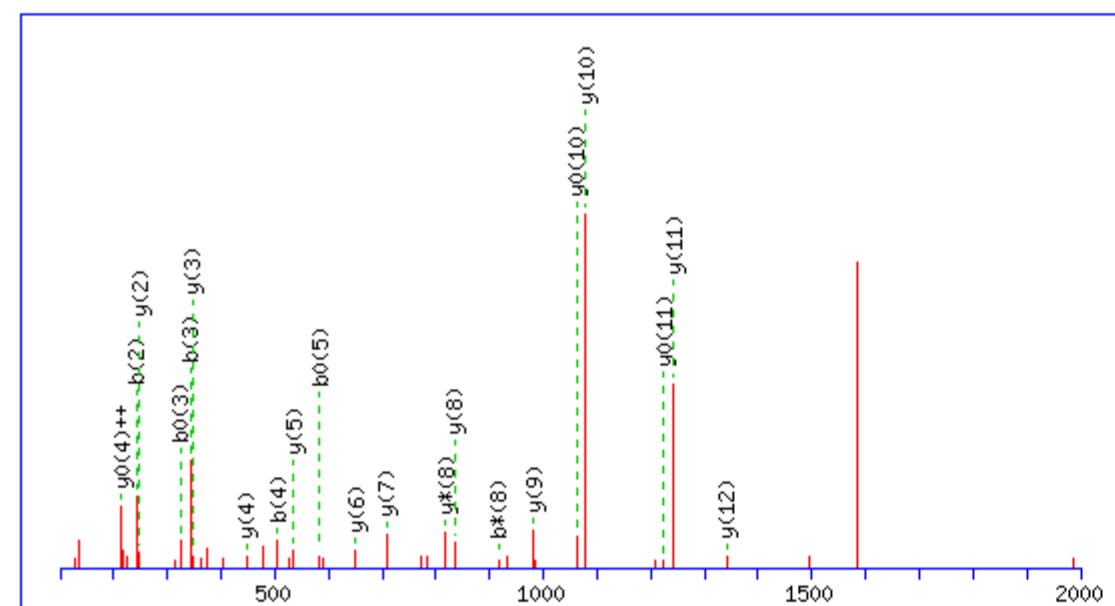

Monoisotopic mass of neutral peptide Mr(calc): 1582.787903

Fixed modifications: Propionamide (C) (apply to specified residues or termini only)

Ions Score: 89 Expect: 1.7e-008

Matches : 21/142 fragment ions using 33 most intense peaks [\(help\)](#)

| #  | b                 | b <sup>++</sup> | b <sup>*</sup>    | b <sup>*++</sup> | b <sup>0</sup>    | b <sup>0++</sup> | Seq. | y                  | y <sup>++</sup> | y <sup>*</sup>    | y <sup>*++</sup> | y <sup>0</sup>     | y <sup>0++</sup>  | #  |
|----|-------------------|-----------------|-------------------|------------------|-------------------|------------------|------|--------------------|-----------------|-------------------|------------------|--------------------|-------------------|----|
| 1  | 130.049869        | 65.528572       |                   |                  | 112.039304        | 56.523290        | E    |                    |                 |                   |                  |                    |                   | 14 |
| 2  | <b>243.133933</b> | 122.070605      |                   |                  | 225.123368        | 113.065322       | I    | 1454.752574        | 727.879925      | 1437.726025       | 719.366651       | 1436.742009        | 718.874643        | 13 |
| 3  | <b>342.202347</b> | 171.604812      |                   |                  | <b>324.191782</b> | 162.599529       | V    | <b>1341.668510</b> | 671.337893      | 1324.641961       | 662.824619       | 1323.657945        | 662.332611        | 12 |
| 4  | <b>505.265676</b> | 253.136476      |                   |                  | 487.255111        | 244.131194       | Y    | <b>1242.600096</b> | 621.803686      | 1225.573547       | 613.290412       | <b>1224.589531</b> | 612.798404        | 11 |
| 5  | 602.318440        | 301.662858      |                   |                  | <b>584.307875</b> | 292.657576       | P    | <b>1079.536767</b> | 540.272022      | 1062.510218       | 531.758747       | <b>1061.526202</b> | 531.266739        | 10 |
| 6  | 749.386854        | 375.197065      |                   |                  | 731.376289        | 366.191783       | F    | <b>982.484003</b>  | 491.745640      | 965.457454        | 483.232365       | 964.473438         | 482.740357        | 9  |
| 7  | 877.445432        | 439.226354      | 860.418883        | 430.713080       | 859.434867        | 430.221072       | Q    | <b>835.415589</b>  | 418.211433      | <b>818.389040</b> | 409.698158       | 817.405024         | 409.206150        | 8  |
| 8  | 934.466896        | 467.737086      | <b>917.440347</b> | 459.223812       | 916.456331        | 458.731804       | G    | <b>707.357011</b>  | 354.182144      | 690.330462        | 345.668869       | 689.346446         | 345.176861        | 7  |
| 9  | 1049.493839       | 525.250558      | 1032.467290       | 516.737283       | 1031.483274       | 516.245275       | D    | <b>650.335547</b>  | 325.671412      | 633.308998        | 317.158137       | 632.324982         | 316.666129        | 6  |
| 10 | 1136.525867       | 568.766572      | 1119.499318       | 560.253297       | 1118.515302       | 559.761289       | S    | <b>535.308604</b>  | 268.157940      | 518.282055        | 259.644666       | 517.298039         | 259.152658        | 5  |
| 11 | 1237.573546       | 619.290411      | 1220.546997       | 610.777137       | 1219.562981       | 610.285129       | T    | <b>448.276576</b>  | 224.641926      | 431.250027        | 216.128652       | 430.266011         | <b>215.636644</b> | 4  |
| 12 | 1336.641960       | 668.824618      | 1319.615411       | 660.311344       | 1318.631395       | 659.819336       | V    | <b>347.228897</b>  | 174.118087      | 330.202348        | 165.604812       | 329.218332         | 165.112804        | 3  |
| 13 | 1437.689639       | 719.348458      | 1420.663090       | 710.835183       | 1419.679074       | 710.343175       | T    | <b>248.160483</b>  | 124.583879      | 231.133934        | 116.070605       | 230.149918         | 115.578597        | 2  |
| 14 |                   |                 |                   |                  |                   |                  | K    | 147.112804         | 74.060040       | 130.086255        | 65.546765        |                    |                   | 1  |

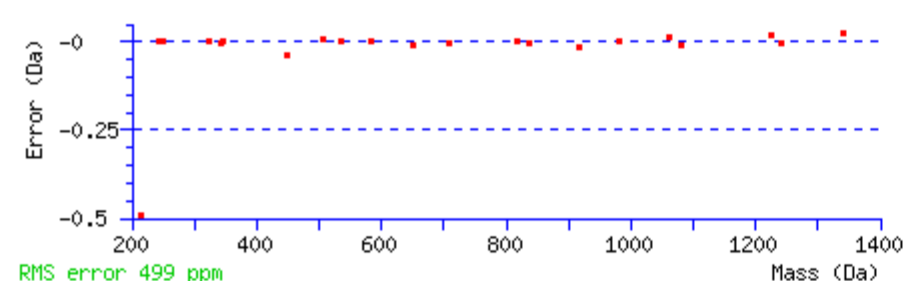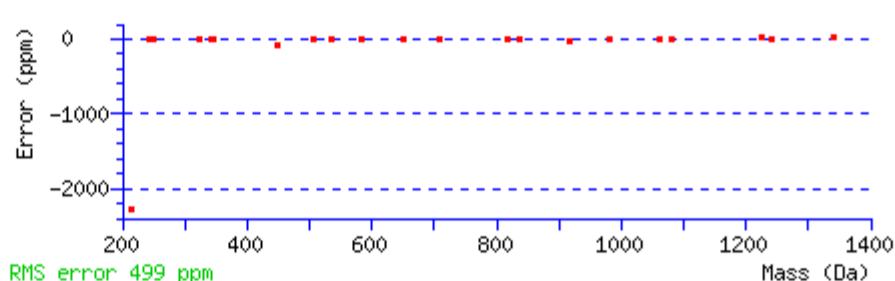

NCBI BLAST search of **EIVYPFQGDSTVTK**

(Parameters: blastp, nr protein database, expect=20000, no filter, PAM30)

Other BLAST [web gateways](#)

## All matches to this query

| Score | Mr(calc):   | Delta     | Sequence                       |
|-------|-------------|-----------|--------------------------------|
| 88.5  | 1582.787903 | -0.001815 | <a href="#">EIVYPFQGDSTVTK</a> |
| 12.4  | 1582.792603 | -0.006515 | <a href="#">KNTSAHFLPMVVHS</a> |
| 6.3   | 1582.789230 | -0.003142 | <a href="#">KYGVAVQDFAGSWR</a> |
| 5.4   | 1582.792603 | -0.006515 | <a href="#">KNTSAHFLPMVVHS</a> |
| 0.3   | 1582.788574 | -0.002486 | <a href="#">QAKLAVQMDVHDGR</a> |

# MASCOT Search Results

## Peptide View

### MS/MS Fragmentation of AASQPTSLAPEK

Found in **MBOA7\_HUMAN**, Lysophospholipid acyltransferase 7 OS=Homo sapiens GN=MBOAT7 PE=1 SV=2

Match to Query 29169: 1198.622708 from(600.318630,2+) rtinseconds(1229) index(8583)

Title: Locus:1.1.1.1791.44

Data file 2011-11-12 - TFD - EP 6-1.mgf

Click mouse within plot area to zoom in by factor of two about that point

Or, Plot from  to  Da

Label all possible matches  Label matches used for scoring

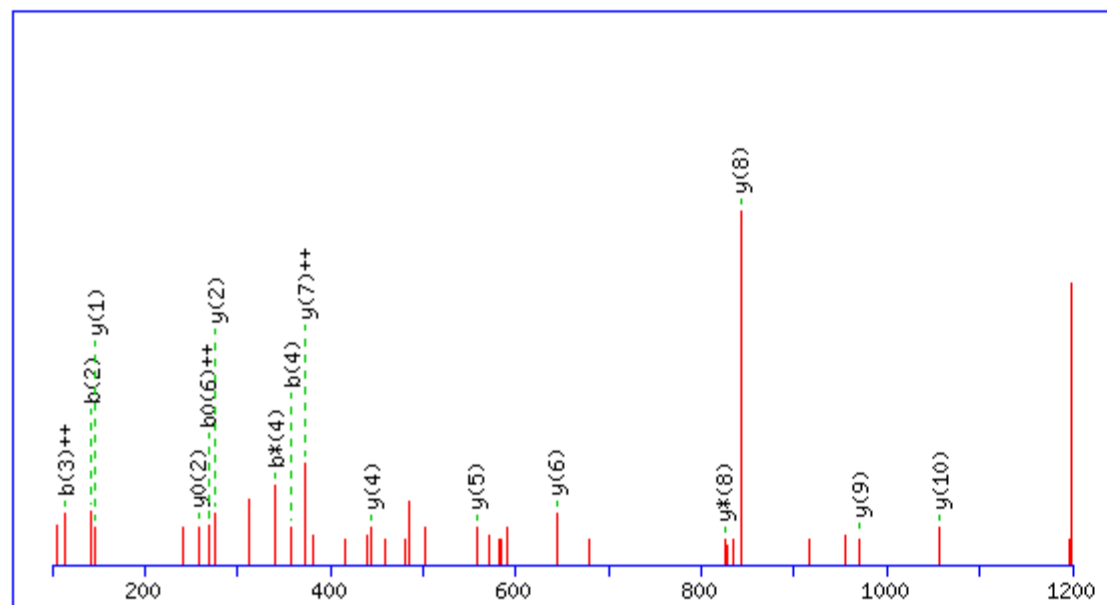

Monoisotopic mass of neutral peptide Mr(calc): 1198.619339

Fixed modifications: Propionamide (C) (apply to specified residues or termini only)

Ions Score: 64 Expect: 5.4e-006

Matches : 17/120 fragment ions using 31 most intense peaks [\(help\)](#)

| #  | b                 | b <sup>++</sup>   | b <sup>*</sup>    | b <sup>*++</sup> | b <sup>0</sup> | b <sup>0++</sup>  | Seq. | y                  | y <sup>++</sup>   | y <sup>*</sup>    | y <sup>*++</sup> | y <sup>0</sup>    | y <sup>0++</sup> | #  |
|----|-------------------|-------------------|-------------------|------------------|----------------|-------------------|------|--------------------|-------------------|-------------------|------------------|-------------------|------------------|----|
| 1  | 72.044390         | 36.525833         |                   |                  |                |                   | A    |                    |                   |                   |                  |                   |                  | 12 |
| 2  | <b>143.081504</b> | 72.044390         |                   |                  |                |                   | A    | 1128.589530        | 564.798403        | 1111.562981       | 556.285129       | 1110.578965       | 555.793121       | 11 |
| 3  | 230.113532        | <b>115.560404</b> |                   |                  | 212.102967     | 106.555121        | S    | <b>1057.552416</b> | 529.279846        | 1040.525867       | 520.766572       | 1039.541851       | 520.274564       | 10 |
| 4  | <b>358.172110</b> | 179.589693        | <b>341.145561</b> | 171.076419       | 340.161545     | 170.584411        | Q    | <b>970.520388</b>  | 485.763832        | 953.493839        | 477.250558       | 952.509823        | 476.758550       | 9  |
| 5  | 455.224874        | 228.116075        | 438.198325        | 219.602801       | 437.214309     | 219.110793        | P    | <b>842.461810</b>  | 421.734543        | <b>825.435261</b> | 413.221269       | 824.451245        | 412.729261       | 8  |
| 6  | 556.272553        | 278.639915        | 539.246004        | 270.126640       | 538.261988     | <b>269.634632</b> | T    | 745.409046         | <b>373.208161</b> | 728.382497        | 364.694887       | 727.398481        | 364.202879       | 7  |
| 7  | 643.304581        | 322.155929        | 626.278032        | 313.642654       | 625.294016     | 313.150646        | S    | <b>644.361367</b>  | 322.684322        | 627.334818        | 314.171047       | 626.350802        | 313.679039       | 6  |
| 8  | 756.388645        | 378.697961        | 739.362096        | 370.184686       | 738.378080     | 369.692678        | L    | <b>557.329339</b>  | 279.168308        | 540.302790        | 270.655033       | 539.318774        | 270.163025       | 5  |
| 9  | 827.425759        | 414.216518        | 810.399210        | 405.703243       | 809.415194     | 405.211235        | A    | <b>444.245275</b>  | 222.626275        | 427.218726        | 214.113001       | 426.234710        | 213.620993       | 4  |
| 10 | 924.478523        | 462.742900        | 907.451974        | 454.229625       | 906.467958     | 453.737617        | P    | <b>373.208161</b>  | 187.107719        | 356.181612        | 178.594444       | 355.197596        | 178.102436       | 3  |
| 11 | 1053.521116       | 527.264196        | 1036.494567       | 518.750922       | 1035.510551    | 518.258914        | E    | <b>276.155397</b>  | 138.581336        | 259.128848        | 130.068062       | <b>258.144832</b> | 129.576054       | 2  |
| 12 |                   |                   |                   |                  |                |                   | K    | <b>147.112804</b>  | 74.060040         | 130.086255        | 65.546765        |                   |                  | 1  |

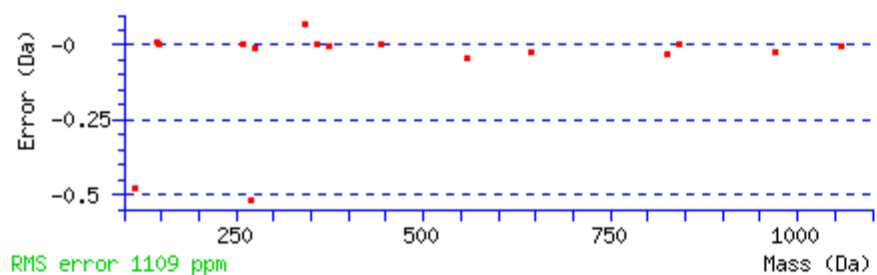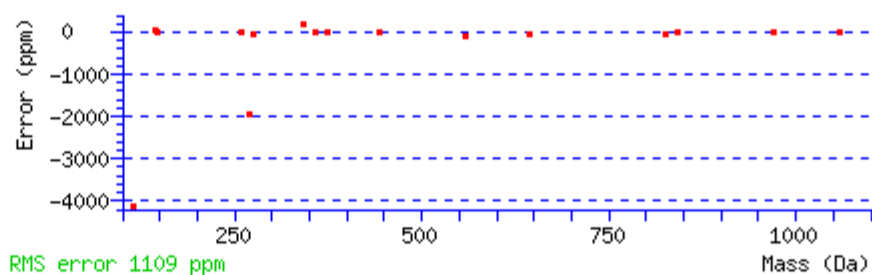

### NCBI BLAST search of AASQPTSLAPEK

(Parameters: blastp, nr protein database, expect=20000, no filter, PAM30)

Other BLAST [web gateways](#)

### All matches to this query

| Score | Mr(calc):   | Delta     | Sequence                     |
|-------|-------------|-----------|------------------------------|
| 63.5  | 1198.619339 | 0.003369  | <a href="#">AASQPTSLAPEK</a> |
| 17.8  | 1198.630600 | -0.007892 | <a href="#">AASQTPSVVPSR</a> |
| 7.1   | 1198.612839 | 0.009869  | <a href="#">DIGHLTRCTL</a>   |
| 1.1   | 1198.619339 | 0.003369  | <a href="#">DLQASLQEPAK</a>  |

**Peptide View**

MS/MS Fragmentation of **LQETTLVANQLR**

Found in **MA2B1\_HUMAN**, Lysosomal alpha-mannosidase OS=Homo sapiens GN=MAN2B1 PE=1 SV=3

Match to Query 34616: 1384.767848 from(693.391200,2+) rtinseconds(2303) index(22381)

Title: Locus:1.1.1.2285.44

Data file 2011-11-10 - TFD - EP 3-7.mgf

Click mouse within plot area to zoom in by factor of two about that point

Or, Plot from  to  Da

Label all possible matches  Label matches used for scoring

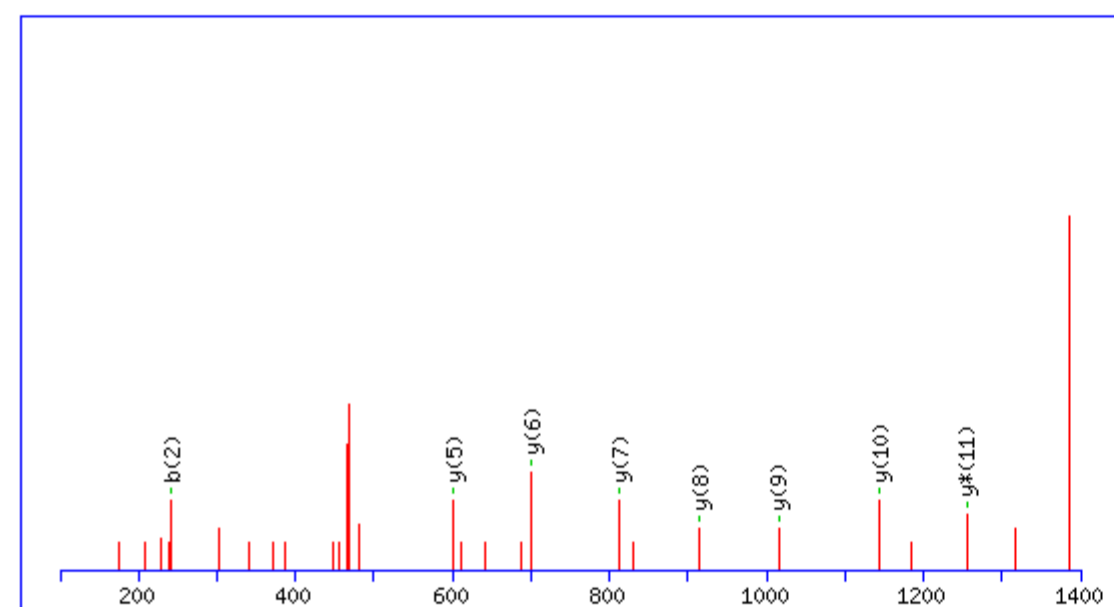

Monoisotopic mass of neutral peptide Mr(calc): 1384.767410

Fixed modifications: Propionamide (C) (apply to specified residues or termini only)

Ions Score: 39 Expect: 0.0019

Matches : 8/112 fragment ions using 12 most intense peaks [\(help\)](#)

| #  | b           | b <sup>++</sup> | b <sup>*</sup> | b <sup>*++</sup> | b <sup>0</sup> | b <sup>0++</sup> | Seq. | y           | y <sup>++</sup> | y <sup>*</sup> | y <sup>*++</sup> | y <sup>0</sup> | y <sup>0++</sup> | #  |
|----|-------------|-----------------|----------------|------------------|----------------|------------------|------|-------------|-----------------|----------------|------------------|----------------|------------------|----|
| 1  | 114.091340  | 57.549308       |                |                  |                |                  | L    |             |                 |                |                  |                |                  | 12 |
| 2  | 242.149918  | 121.578597      | 225.123369     | 113.065323       |                |                  | Q    | 1272.690642 | 636.848959      | 1255.664093    | 628.335685       | 1254.680077    | 627.843677       | 11 |
| 3  | 371.192511  | 186.099894      | 354.165962     | 177.586619       | 353.181946     | 177.094611       | E    | 1144.632064 | 572.819670      | 1127.605515    | 564.306396       | 1126.621499    | 563.814387       | 10 |
| 4  | 472.240190  | 236.623733      | 455.213641     | 228.110459       | 454.229625     | 227.618451       | T    | 1015.589471 | 508.298373      | 998.562922     | 499.785099       | 997.578906     | 499.293091       | 9  |
| 5  | 573.287869  | 287.147573      | 556.261320     | 278.634298       | 555.277304     | 278.142290       | T    | 914.541792  | 457.774534      | 897.515243     | 449.261259       | 896.531227     | 448.769251       | 8  |
| 6  | 686.371933  | 343.689605      | 669.345384     | 335.176330       | 668.361368     | 334.684322       | L    | 813.494113  | 407.250694      | 796.467564     | 398.737420       |                |                  | 7  |
| 7  | 785.440347  | 393.223812      | 768.413798     | 384.710537       | 767.429782     | 384.218529       | V    | 700.410049  | 350.708662      | 683.383500     | 342.195388       |                |                  | 6  |
| 8  | 856.477461  | 428.742369      | 839.450912     | 420.229094       | 838.466896     | 419.737086       | A    | 601.341635  | 301.174455      | 584.315086     | 292.661181       |                |                  | 5  |
| 9  | 970.520388  | 485.763832      | 953.493839     | 477.250558       | 952.509823     | 476.758550       | N    | 530.304521  | 265.655898      | 513.277972     | 257.142624       |                |                  | 4  |
| 10 | 1098.578966 | 549.793121      | 1081.552417    | 541.279847       | 1080.568401    | 540.787839       | Q    | 416.261594  | 208.634435      | 399.235045     | 200.121160       |                |                  | 3  |
| 11 | 1211.663030 | 606.335153      | 1194.636481    | 597.821879       | 1193.652465    | 597.329870       | L    | 288.203016  | 144.605146      | 271.176467     | 136.091871       |                |                  | 2  |
| 12 |             |                 |                |                  |                |                  | R    | 175.118952  | 88.063114       | 158.092403     | 79.549839        |                |                  | 1  |

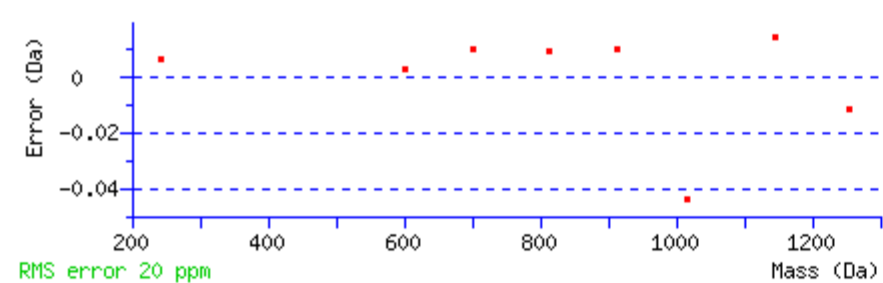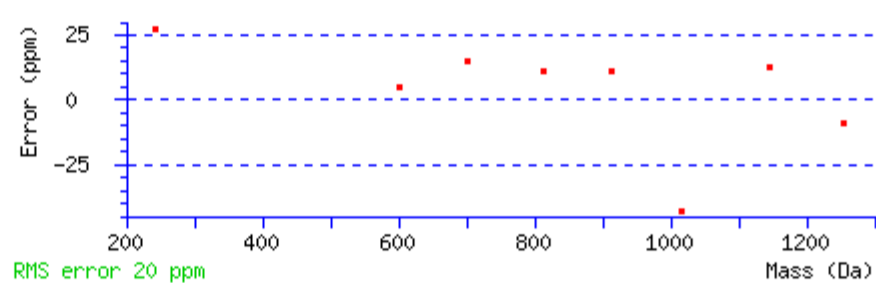

NCBI BLAST search of **LQETTLVANQLR**

(Parameters: blastp, nr protein database, expect=20000, no filter, PAM30)

Other BLAST [web gateways](#)

**All matches to this query**

| Score | Mr(calc):   | Delta    | Sequence                       |
|-------|-------------|----------|--------------------------------|
| 38.7  | 1384.767410 | 0.000438 | <a href="#">LQETTLVANQLR</a>   |
| 9.8   | 1384.756180 | 0.011668 | <a href="#">LKELPDTVGLR</a>    |
| 4.4   | 1384.763550 | 0.004298 | <a href="#">KIEVVMAEPLK</a>    |
| 1.3   | 1384.756195 | 0.011653 | <a href="#">IQIVTAVDASGSPK</a> |
| 0.6   | 1384.756210 | 0.011638 | <a href="#">TTPDIRITVPPK</a>   |

# MASCOT SCIENCE Mascot Search Results

## Peptide View

MS/MS Fragmentation of **YGDSGEQIAGFVK**

Found in **PPGB\_HUMAN**, Lysosomal protective protein OS=Homo sapiens GN=CTSA PE=1 SV=2

Match to Query 42734: 1369.649608 from(685.832080,2+) rtinseconds(2414) index(28853)

Title: Locus:1.1.1.2138.46

Data file 2011-11-12 - TFD - EP 5-6.mgf

Click mouse within plot area to zoom in by factor of two about that point

Or, Plot from  to  Da

Label all possible matches  Label matches used for scoring

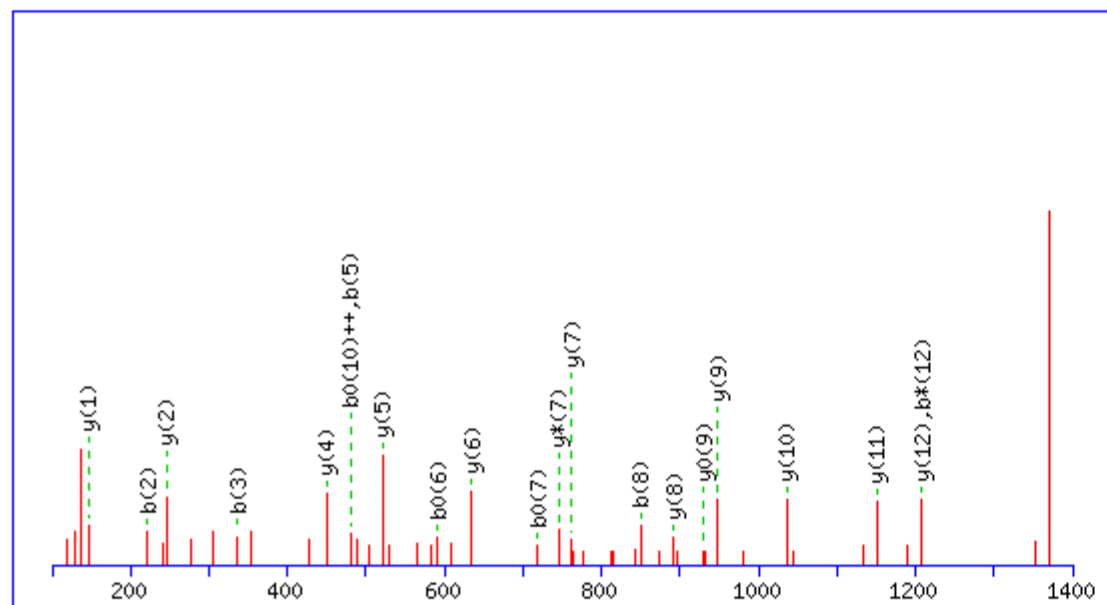

Monoisotopic mass of neutral peptide Mr(calc): 1369.651398

Fixed modifications: Propionamide (C) (apply to specified residues or termini only)

Ions Score: 115 Expect: 3.5e-011

Matches : 21/114 fragment ions using 23 most intense peaks [\(help\)](#)

| #  | b                 | b <sup>++</sup> | b*                 | b <sup>+++</sup> | b <sup>0</sup>    | b <sup>0++</sup>  | Seq. | y                  | y <sup>++</sup> | y*                | y <sup>+++</sup> | y <sup>0</sup>    | y <sup>0++</sup> | #  |
|----|-------------------|-----------------|--------------------|------------------|-------------------|-------------------|------|--------------------|-----------------|-------------------|------------------|-------------------|------------------|----|
| 1  | 164.070605        | 82.538940       |                    |                  |                   |                   | Y    |                    |                 |                   |                  |                   |                  | 13 |
| 2  | <b>221.092069</b> | 111.049673      |                    |                  |                   |                   | G    | <b>1207.595344</b> | 604.301310      | 1190.568795       | 595.788036       | 1189.584779       | 595.296028       | 12 |
| 3  | <b>336.119012</b> | 168.563144      |                    |                  | 318.108447        | 159.557862        | D    | <b>1150.573880</b> | 575.790578      | 1133.547331       | 567.277304       | 1132.563315       | 566.785296       | 11 |
| 4  | 423.151040        | 212.079158      |                    |                  | 405.140475        | 203.073876        | S    | <b>1035.546937</b> | 518.277107      | 1018.520388       | 509.763832       | 1017.536372       | 509.271824       | 10 |
| 5  | <b>480.172504</b> | 240.589890      |                    |                  | 462.161939        | 231.584608        | G    | <b>948.514909</b>  | 474.761093      | 931.488360        | 466.247818       | <b>930.504344</b> | 465.755810       | 9  |
| 6  | 609.215097        | 305.111187      |                    |                  | <b>591.204532</b> | 296.105904        | E    | <b>891.493445</b>  | 446.250361      | 874.466896        | 437.737086       | 873.482880        | 437.245078       | 8  |
| 7  | 737.273675        | 369.140476      | 720.247126         | 360.627201       | <b>719.263110</b> | 360.135193        | Q    | <b>762.450852</b>  | 381.729064      | <b>745.424303</b> | 373.215790       |                   |                  | 7  |
| 8  | <b>850.357739</b> | 425.682508      | 833.331190         | 417.169233       | 832.347174        | 416.677225        | I    | <b>634.392274</b>  | 317.699775      | 617.365725        | 309.186501       |                   |                  | 6  |
| 9  | 921.394853        | 461.201065      | 904.368304         | 452.687790       | 903.384288        | 452.195782        | A    | <b>521.308210</b>  | 261.157743      | 504.281661        | 252.644469       |                   |                  | 5  |
| 10 | 978.416317        | 489.711797      | 961.389768         | 481.198522       | 960.405752        | <b>480.706514</b> | G    | <b>450.271096</b>  | 225.639186      | 433.244547        | 217.125912       |                   |                  | 4  |
| 11 | 1125.484731       | 563.246004      | 1108.458182        | 554.732729       | 1107.474166       | 554.240721        | F    | 393.249632         | 197.128454      | 376.223083        | 188.615180       |                   |                  | 3  |
| 12 | 1224.553145       | 612.780211      | <b>1207.526596</b> | 604.266936       | 1206.542580       | 603.774928        | V    | <b>246.181218</b>  | 123.594247      | 229.154669        | 115.080973       |                   |                  | 2  |
| 13 |                   |                 |                    |                  |                   |                   | K    | <b>147.112804</b>  | 74.060040       | 130.086255        | 65.546765        |                   |                  | 1  |

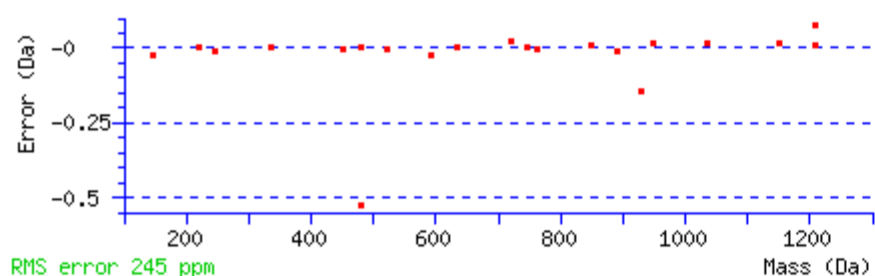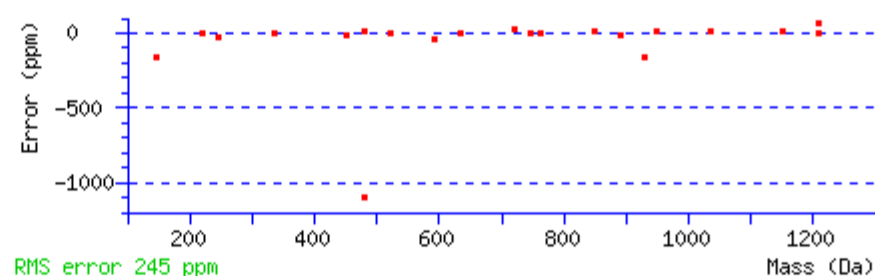

NCBI BLAST search of **YGDSGEQIAGFVK**

(Parameters: blastp, nr protein database, expect=20000, no filter, PAM30)

Other BLAST [web gateways](#)

All matches to this query

| Score | Mr(calc):   | Delta     | Sequence                      |
|-------|-------------|-----------|-------------------------------|
| 114.7 | 1369.651398 | -0.001790 | <a href="#">YGDSGEQIAGFVK</a> |
| 9.7   | 1369.640823 | 0.008785  | <a href="#">YGRCDALTASSR</a>  |
| 7.9   | 1369.662613 | -0.013005 | <a href="#">NFENTRESFVK</a>   |

Mascot: <http://www.matrixscience.com/>

# MASCOT SCIENCE Mascot Search Results

## Peptide View

### MS/MS Fragmentation of VEEVGPYTYR

Found in **SCRB2\_HUMAN**, Lysosome membrane protein 2 OS=Homo sapiens GN=SCARB2 PE=1 SV=2

Match to Query 31847: 1211.582788 from(606.798670,2+) rtinseconds(1893) index(21169)

Title: Locus:1.1.1.1110.32

Data file 2012-01-27 - TFD - Epitel - IEC - 10ul - 1.mgf

Click mouse within plot area to zoom in by factor of two about that point

Or, Plot from  to  Da

Label all possible matches  Label matches used for scoring

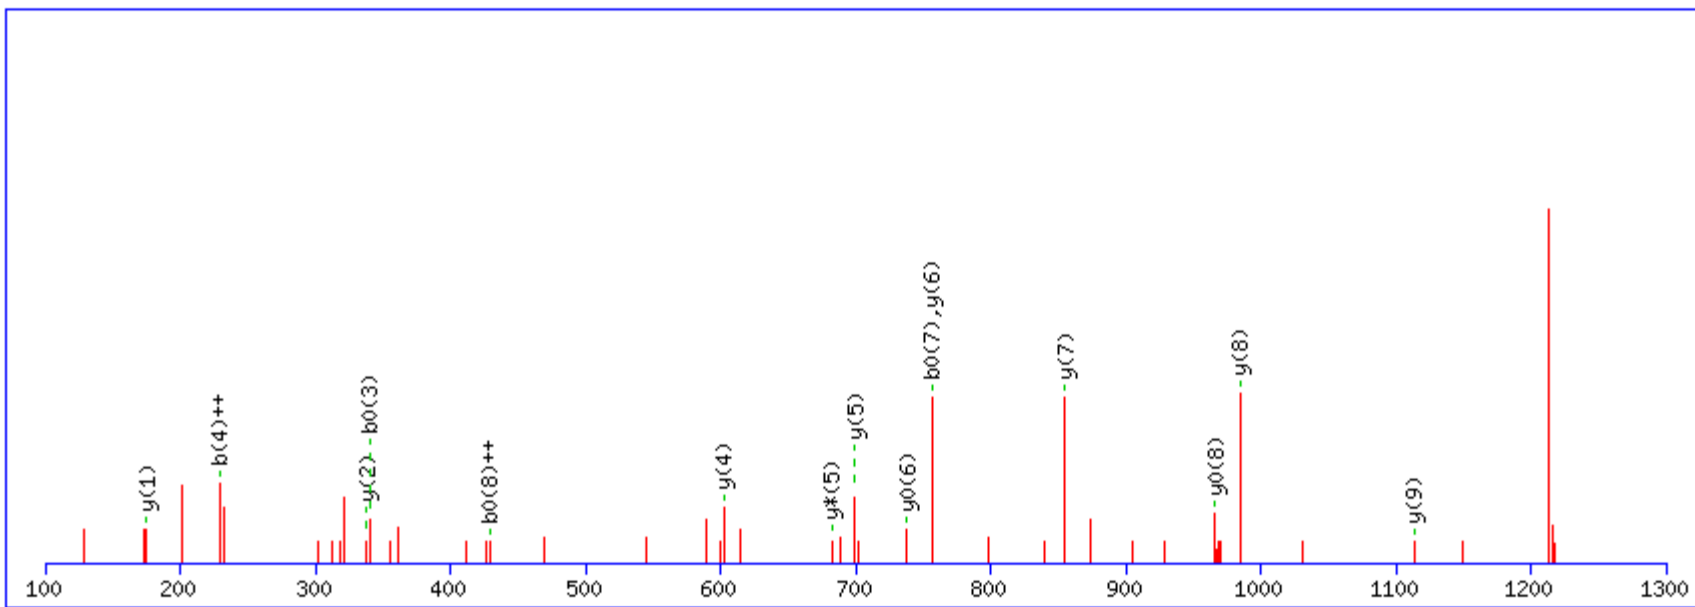

Monoisotopic mass of neutral peptide Mr(calc): 1211.582245

Fixed modifications: Carbamidomethyl (C) (apply to specified residues or termini only)

Ions Score: 44 Expect: 0.00021

Matches : 16/84 fragment ions using 29 most intense peaks [\(help\)](#)

| #  | b           | b <sup>++</sup> | b <sup>0</sup> | b <sup>0++</sup> | Seq. | y           | y <sup>++</sup> | y <sup>*</sup> | y <sup>*++</sup> | y <sup>0</sup> | y <sup>0++</sup> | #  |
|----|-------------|-----------------|----------------|------------------|------|-------------|-----------------|----------------|------------------|----------------|------------------|----|
| 1  | 100.075690  | 50.541483       |                |                  | V    |             |                 |                |                  |                |                  | 10 |
| 2  | 229.118283  | 115.062780      | 211.107718     | 106.057497       | E    | 1113.521117 | 557.264197      | 1096.494568    | 548.750922       | 1095.510552    | 548.258914       | 9  |
| 3  | 358.160876  | 179.584076      | 340.150311     | 170.578794       | E    | 984.478524  | 492.742900      | 967.451975     | 484.229626       | 966.467959     | 483.737618       | 8  |
| 4  | 457.229290  | 229.118283      | 439.218725     | 220.113001       | V    | 855.435931  | 428.221604      | 838.409382     | 419.708329       | 837.425366     | 419.216321       | 7  |
| 5  | 514.250754  | 257.629015      | 496.240189     | 248.623733       | G    | 756.367517  | 378.687397      | 739.340968     | 370.174122       | 738.356952     | 369.682114       | 6  |
| 6  | 611.303518  | 306.155397      | 593.292953     | 297.150115       | P    | 699.346053  | 350.176665      | 682.319504     | 341.663390       | 681.335488     | 341.171382       | 5  |
| 7  | 774.366847  | 387.687062      | 756.356282     | 378.681779       | Y    | 602.293289  | 301.650283      | 585.266740     | 293.137008       | 584.282724     | 292.645000       | 4  |
| 8  | 875.414526  | 438.210901      | 857.403961     | 429.205619       | T    | 439.229960  | 220.118618      | 422.203411     | 211.605344       | 421.219395     | 211.113336       | 3  |
| 9  | 1038.477855 | 519.742566      | 1020.467290    | 510.737283       | Y    | 338.182281  | 169.594778      | 321.155732     | 161.081504       |                |                  | 2  |
| 10 |             |                 |                |                  | R    | 175.118952  | 88.063114       | 158.092403     | 79.549839        |                |                  | 1  |

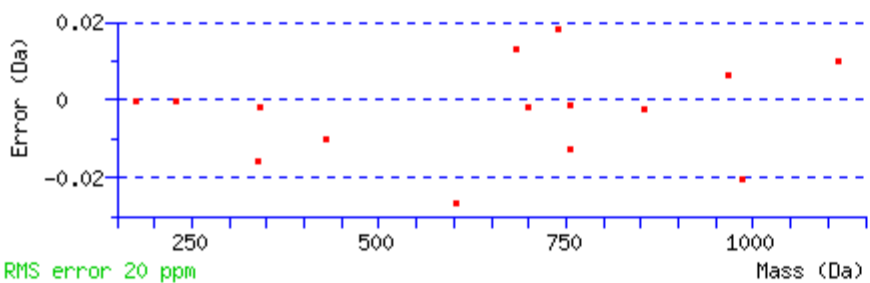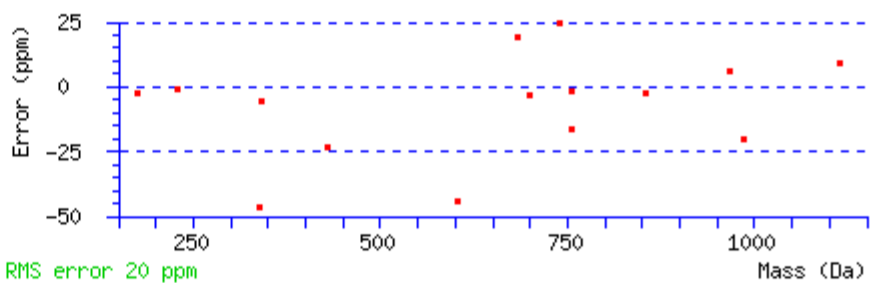

### NCBI BLAST search of VEEVGPYTYR

(Parameters: blastp, nr protein database, expect=20000, no filter, PAM30)

Other BLAST [web gateways](#)

### All matches to this query

| Score | Mr(calc):   | Delta     | Sequence                    |
|-------|-------------|-----------|-----------------------------|
| 44.1  | 1211.582245 | 0.000543  | <a href="#">VEEVGPYTYR</a>  |
| 4.6   | 1211.571701 | 0.011087  | <a href="#">KNPAPQCPPR</a>  |
| 4.1   | 1211.578201 | 0.004587  | <a href="#">DLEAHIDSANK</a> |
| 0.7   | 1211.585602 | -0.002814 | <a href="#">VENNMVSLYK</a>  |



# Mascot Search Results

## Peptide View

MS/MS Fragmentation of **YLDLILNDFVR**

Found in **SYK\_HUMAN**, Lysyl-tRNA synthetase OS=Homo sapiens GN=KARS PE=1 SV=3

Match to Query 35076: 1379.751968 from(690.883260,2+) rtinseconds(3974) index(59781)

Title: Locus:1.1.1.1885.23

Data file 2012-01-27 - TFD - Epitel - IEC - 10ul - 2.mgf

Click mouse within plot area to zoom in by factor of two about that point

Or, Plot from  to  Da

Label all possible matches  Label matches used for scoring

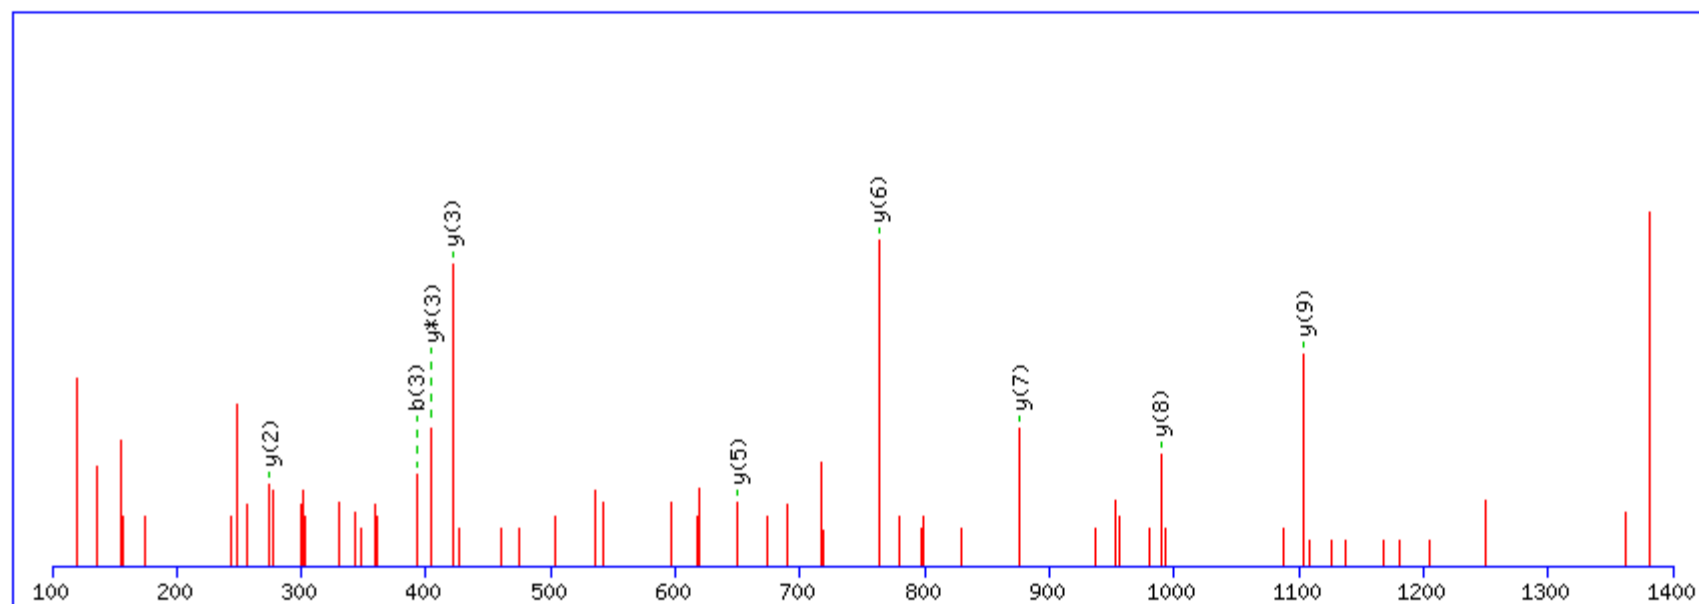

Monoisotopic mass of neutral peptide Mr(calc): 1379.744888

Fixed modifications: Carbamidomethyl (C) (apply to specified residues or termini only)

Ions Score: 32 Expect: 0.0081

Matches : 9/98 fragment ions using 24 most intense peaks [\(help\)](#)

| #  | b                 | b <sup>++</sup> | b*          | b <sup>+++</sup> | b <sup>0</sup> | b <sup>0++</sup> | Seq. | y                  | y <sup>++</sup> | y*                | y <sup>+++</sup> | y <sup>0</sup> | y <sup>0++</sup> | #  |
|----|-------------------|-----------------|-------------|------------------|----------------|------------------|------|--------------------|-----------------|-------------------|------------------|----------------|------------------|----|
| 1  | 164.070605        | 82.538940       |             |                  |                |                  | Y    |                    |                 |                   |                  |                |                  | 11 |
| 2  | 277.154669        | 139.080973      |             |                  |                |                  | L    | 1217.688849        | 609.348063      | 1200.662300       | 600.834788       | 1199.678284    | 600.342780       | 10 |
| 3  | <b>392.181612</b> | 196.594444      |             |                  | 374.171047     | 187.589162       | D    | <b>1104.604785</b> | 552.806031      | 1087.578236       | 544.292756       | 1086.594220    | 543.800748       | 9  |
| 4  | 505.265676        | 253.136476      |             |                  | 487.255111     | 244.131194       | L    | <b>989.577842</b>  | 495.292559      | 972.551293        | 486.779285       | 971.567277     | 486.287277       | 8  |
| 5  | 618.349740        | 309.678508      |             |                  | 600.339175     | 300.673226       | I    | <b>876.493778</b>  | 438.750527      | 859.467229        | 430.237253       | 858.483213     | 429.745245       | 7  |
| 6  | 731.433804        | 366.220540      |             |                  | 713.423239     | 357.215258       | L    | <b>763.409714</b>  | 382.208495      | 746.383165        | 373.695221       | 745.399149     | 373.203213       | 6  |
| 7  | 845.476731        | 423.242004      | 828.450182  | 414.728729       | 827.466166     | 414.236721       | N    | <b>650.325650</b>  | 325.666463      | 633.299101        | 317.153189       | 632.315085     | 316.661181       | 5  |
| 8  | 960.503674        | 480.755475      | 943.477125  | 472.242201       | 942.493109     | 471.750193       | D    | 536.282723         | 268.645000      | 519.256174        | 260.131725       | 518.272158     | 259.639717       | 4  |
| 9  | 1107.572088       | 554.289682      | 1090.545539 | 545.776408       | 1089.561523    | 545.284400       | F    | <b>421.255780</b>  | 211.131528      | <b>404.229231</b> | 202.618254       |                |                  | 3  |
| 10 | 1206.640502       | 603.823889      | 1189.613953 | 595.310615       | 1188.629937    | 594.818607       | V    | <b>274.187366</b>  | 137.597321      | 257.160817        | 129.084047       |                |                  | 2  |
| 11 |                   |                 |             |                  |                |                  | R    | 175.118952         | 88.063114       | 158.092403        | 79.549839        |                |                  | 1  |

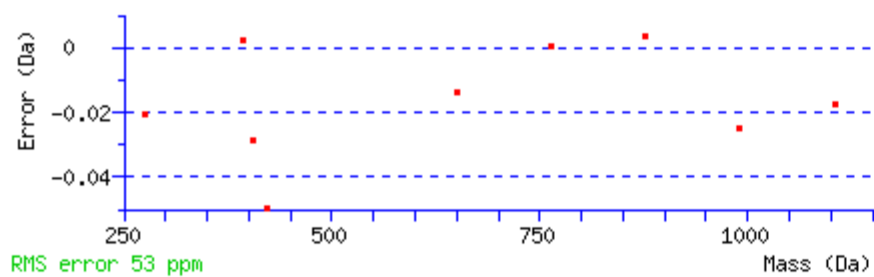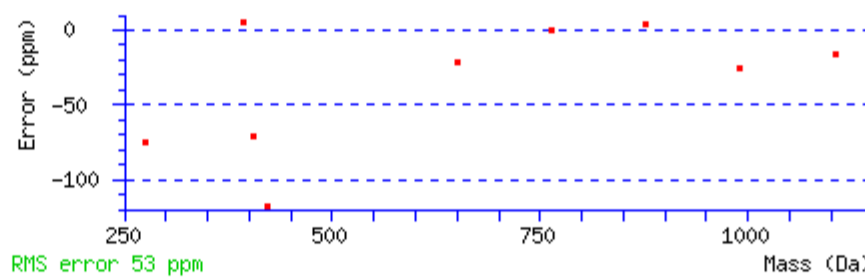

NCBI BLAST search of [YLDLILNDFVR](#)

(Parameters: blastp, nr protein database, expect=20000, no filter, PAM30)

Other BLAST [web gateways](#)

All matches to this query

| Score | Mr(calc):   | Delta     | Sequence                      |
|-------|-------------|-----------|-------------------------------|
| 32.1  | 1379.744888 | 0.007080  | <a href="#">YLDLILNDFVR</a>   |
| 5.7   | 1379.755676 | -0.003708 | <a href="#">IFMLLVVGITSGM</a> |

# MASCOT Search Results

## Peptide View

MS/MS Fragmentation of **LQSLGVPGAAASR**

Found in **MGDP1\_HUMAN**, Magnesium-dependent phosphatase 1 OS=Homo sapiens GN=MDP1 PE=1 SV=1

Match to Query 36747: 1225.677428 from(613.845990,2+) rtinseconds(1945) index(19783)

Title: Locus:1.1.1.1997.36

Data file 2011-11-10 - TFD - EP 4-6.mgf

Click mouse within plot area to zoom in by factor of two about that point

Or, Plot from  to  Da

Label all possible matches  Label matches used for scoring

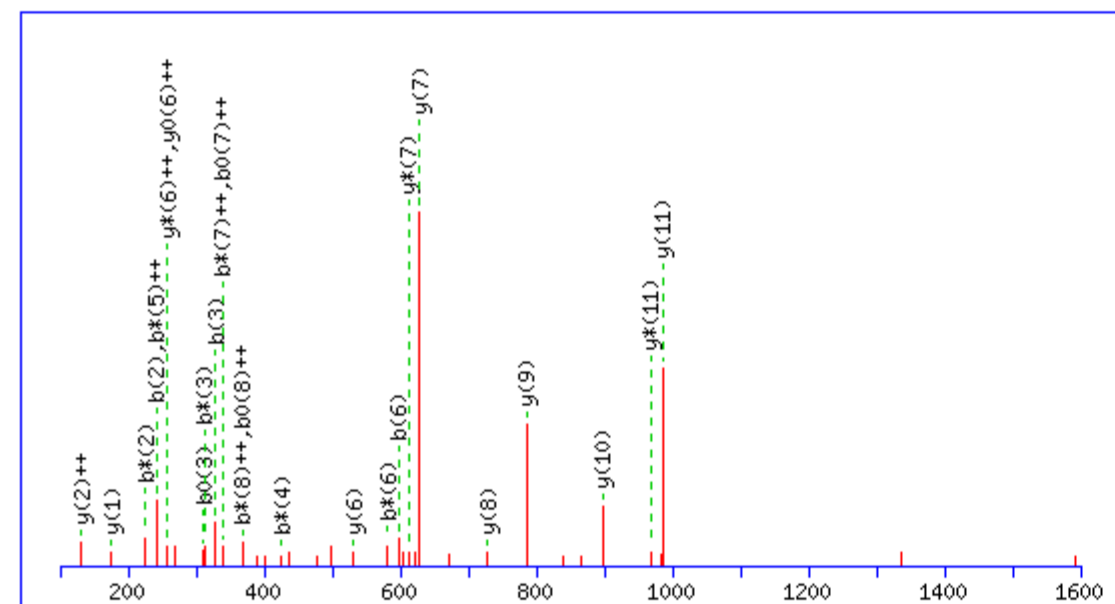

Monoisotopic mass of neutral peptide Mr(calc): 1225.677872

Fixed modifications: Propionamide (C) (apply to specified residues or termini only)

Ions Score: 41 Expect: 0.00075

Matches : 25/136 fragment ions using 37 most intense peaks [\(help\)](#)

| #  | b                 | b <sup>++</sup> | b <sup>+</sup>    | b <sup>++</sup>   | b <sup>0</sup>    | b <sup>0++</sup>  | Seq. | y                 | y <sup>++</sup>   | y <sup>+</sup>    | y <sup>++</sup>   | y <sup>0</sup> | y <sup>0++</sup>  | #  |
|----|-------------------|-----------------|-------------------|-------------------|-------------------|-------------------|------|-------------------|-------------------|-------------------|-------------------|----------------|-------------------|----|
| 1  | 114.091340        | 57.549308       |                   |                   |                   |                   | L    |                   |                   |                   |                   |                |                   | 13 |
| 2  | <b>242.149918</b> | 121.578597      | <b>225.123369</b> | 113.065323        |                   |                   | Q    | 1113.601098       | 557.304187        | 1096.574549       | 548.790913        | 1095.590533    | 548.298905        | 12 |
| 3  | <b>329.181946</b> | 165.094611      | <b>312.155397</b> | 156.581336        | <b>311.171381</b> | 156.089328        | S    | <b>985.542520</b> | 493.274898        | <b>968.515971</b> | 484.761623        | 967.531955     | 484.269615        | 11 |
| 4  | 442.266010        | 221.636643      | <b>425.239461</b> | 213.123369        | 424.255445        | 212.631361        | L    | <b>898.510492</b> | 449.758884        | 881.483943        | 441.245610        | 880.499927     | 440.753602        | 10 |
| 5  | 499.287474        | 250.147375      | 482.260925        | <b>241.634100</b> | 481.276909        | 241.142092        | G    | <b>785.426428</b> | 393.216852        | 768.399879        | 384.703577        | 767.415863     | 384.211570        | 9  |
| 6  | <b>598.355888</b> | 299.681582      | <b>581.329339</b> | 291.168308        | 580.345323        | 290.676300        | V    | <b>728.404964</b> | 364.706120        | 711.378415        | 356.192846        | 710.394399     | 355.700838        | 8  |
| 7  | 695.408652        | 348.207964      | 678.382103        | <b>339.694690</b> | 677.398087        | <b>339.202682</b> | P    | <b>629.336550</b> | 315.171913        | <b>612.310001</b> | 306.658639        | 611.325985     | 306.166631        | 7  |
| 8  | 752.430116        | 376.718696      | 735.403567        | <b>368.205422</b> | 734.419551        | <b>367.713414</b> | G    | <b>532.283786</b> | 266.645531        | 515.257237        | <b>258.132256</b> | 514.273221     | <b>257.640248</b> | 6  |
| 9  | 823.467230        | 412.237253      | 806.440681        | 403.723979        | 805.456665        | 403.231971        | A    | 475.262322        | 238.134799        | 458.235773        | 229.621524        | 457.251757     | 229.129516        | 5  |
| 10 | 894.504344        | 447.755810      | 877.477795        | 439.242536        | 876.493779        | 438.750528        | A    | 404.225208        | 202.616242        | 387.198659        | 194.102967        | 386.214643     | 193.610959        | 4  |
| 11 | 965.541458        | 483.274367      | 948.514909        | 474.761093        | 947.530893        | 474.269085        | A    | 333.188094        | 167.097685        | 316.161545        | 158.584410        | 315.177529     | 158.092402        | 3  |
| 12 | 1052.573486       | 526.790381      | 1035.546937       | 518.277107        | 1034.562921       | 517.785099        | S    | 262.150980        | <b>131.579128</b> | 245.124431        | 123.065853        | 244.140415     | 122.573845        | 2  |
| 13 |                   |                 |                   |                   |                   |                   | R    | <b>175.118952</b> | 88.063114         | 158.092403        | 79.549839         |                |                   | 1  |

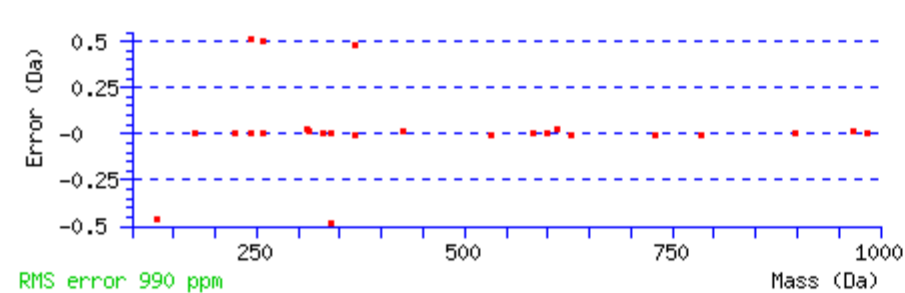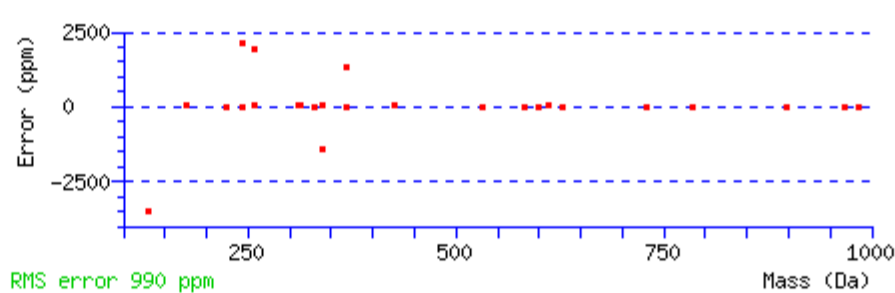

NCBI BLAST search of **LQSLGVPGAAASR**

(Parameters: blastp, nr protein database, expect=20000, no filter, PAM30)

Other BLAST [web gateways](#)

## All matches to this query

| Score | Mr(calc):   | Delta     | Sequence                      |
|-------|-------------|-----------|-------------------------------|
| 41.0  | 1225.677872 | -0.000444 | <a href="#">LQSLGVPGAAASR</a> |
| 26.2  | 1225.677841 | -0.000413 | <a href="#">EKALRPEVER</a>    |
| 9.8   | 1225.666626 | 0.010802  | <a href="#">AGLSPAPELLSR</a>  |
| 7.7   | 1225.666641 | 0.010787  | <a href="#">SGPGLLPSEITR</a>  |
| 7.7   | 1225.689087 | -0.011659 | <a href="#">EKARPRPTQK</a>    |
| 0.8   | 1225.666626 | 0.010802  | <a href="#">KPAEVEQPKGK</a>   |
| 0.4   | 1225.666626 | 0.010802  | <a href="#">AGLSPAPELLSR</a>  |
| 0.2   | 1225.666656 | 0.010772  | <a href="#">SSLTPLGPPVSR</a>  |

# **MASCOT** Mascot Search Results

## Peptide View

MS/MS Fragmentation of **ILEIEDLFSSLK**

Found in **MPP5\_HUMAN**, MAGUK p55 subfamily member 5 OS=Homo sapiens GN=MPP5 PE=1 SV=3

Match to Query 43399: 1405.770808 from(703.892680,2+) rtinseconds(4342) index(64249)

Title: Locus:1.1.1.3062.8

Data file 2011-11-14 - TFD - EP 8-2.mgf

Click mouse within plot area to zoom in by factor of two about that point

Or, Plot from  to  Da

Label all possible matches  Label matches used for scoring

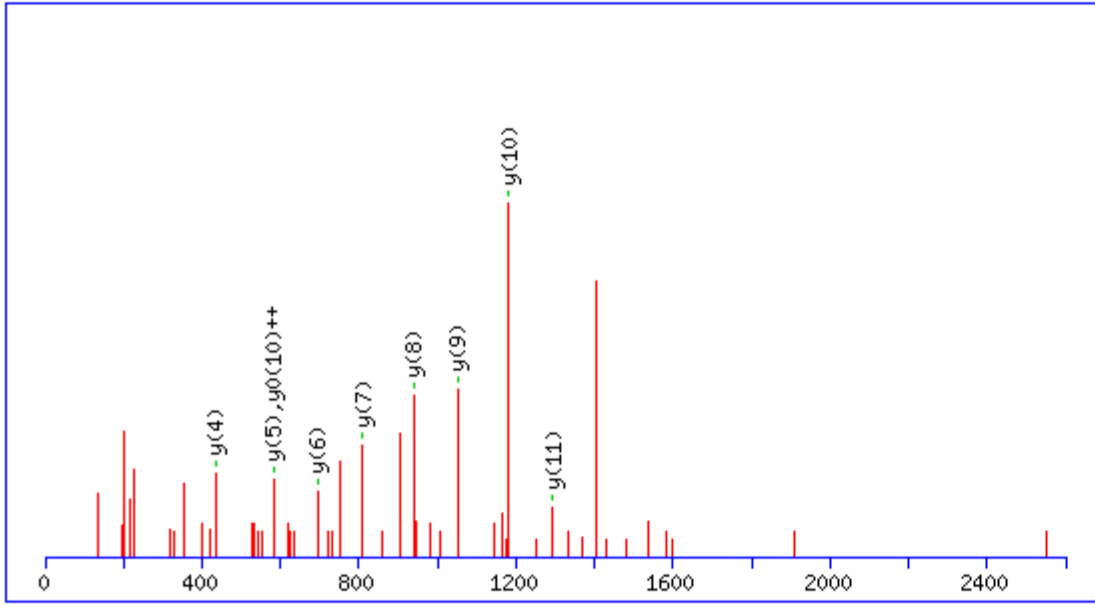

Monoisotopic mass of neutral peptide Mr(calc): 1405.770416

Fixed modifications: Propionamide (C) (apply to specified residues or termini only)

Ions Score: 62 Expect: 4.6e-006

Matches : 9/102 fragment ions using 13 most intense peaks [\(help\)](#)

| #  | b           | b <sup>++</sup> | b <sup>0</sup> | b <sup>0++</sup> | Seq. | y                  | y <sup>++</sup> | y <sup>*</sup> | y <sup>***</sup> | y <sup>0</sup> | y <sup>0++</sup>  | #  |
|----|-------------|-----------------|----------------|------------------|------|--------------------|-----------------|----------------|------------------|----------------|-------------------|----|
| 1  | 114.091340  | 57.549308       |                |                  | I    |                    |                 |                |                  |                |                   | 12 |
| 2  | 227.175404  | 114.091340      |                |                  | L    | <b>1293.693659</b> | 647.350468      | 1276.667110    | 638.837193       | 1275.683094    | 638.345185        | 11 |
| 3  | 356.217997  | 178.612637      | 338.207432     | 169.607354       | E    | <b>1180.609595</b> | 590.808436      | 1163.583046    | 582.295161       | 1162.599030    | <b>581.803153</b> | 10 |
| 4  | 469.302061  | 235.154669      | 451.291496     | 226.149386       | I    | <b>1051.567002</b> | 526.287139      | 1034.540453    | 517.773865       | 1033.556437    | 517.281857        | 9  |
| 5  | 598.344654  | 299.675965      | 580.334089     | 290.670683       | E    | <b>938.482938</b>  | 469.745107      | 921.456389     | 461.231833       | 920.472373     | 460.739825        | 8  |
| 6  | 713.371597  | 357.189437      | 695.361032     | 348.184154       | D    | <b>809.440345</b>  | 405.223811      | 792.413796     | 396.710536       | 791.429780     | 396.218528        | 7  |
| 7  | 826.455661  | 413.731469      | 808.445096     | 404.726186       | L    | <b>694.413402</b>  | 347.710339      | 677.386853     | 339.197065       | 676.402837     | 338.705057        | 6  |
| 8  | 973.524075  | 487.265676      | 955.513510     | 478.260393       | F    | <b>581.329338</b>  | 291.168307      | 564.302789     | 282.655033       | 563.318773     | 282.163025        | 5  |
| 9  | 1060.556103 | 530.781690      | 1042.545538    | 521.776407       | S    | <b>434.260924</b>  | 217.634100      | 417.234375     | 209.120826       | 416.250359     | 208.628818        | 4  |
| 10 | 1147.588131 | 574.297704      | 1129.577566    | 565.292421       | S    | 347.228896         | 174.118086      | 330.202347     | 165.604811       | 329.218331     | 165.112803        | 3  |
| 11 | 1260.672195 | 630.839736      | 1242.661630    | 621.834453       | L    | 260.196868         | 130.602072      | 243.170319     | 122.088797       |                |                   | 2  |
| 12 |             |                 |                |                  | K    | 147.112804         | 74.060040       | 130.086255     | 65.546765        |                |                   | 1  |

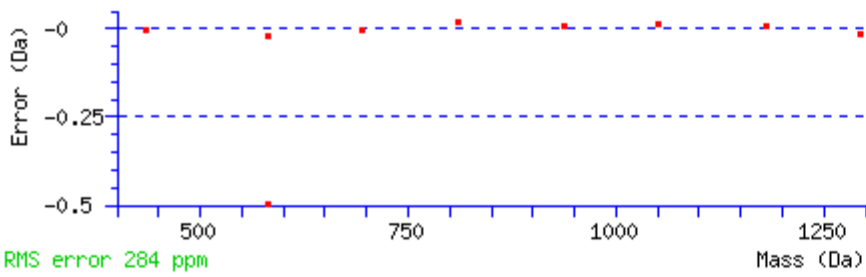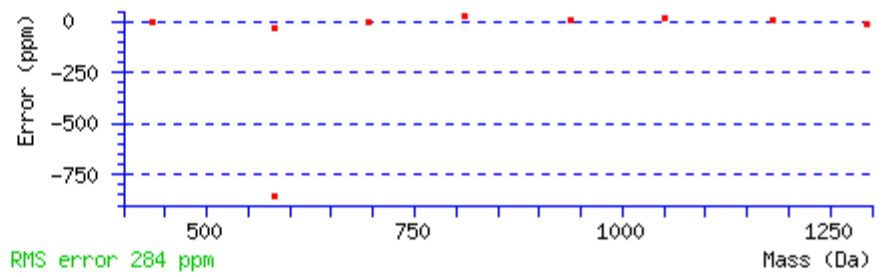

NCBI BLAST search of [ILEIEDLFSSLK](#)

(Parameters: blastp, nr protein database, expect=20000, no filter, PAM30)

Other BLAST [web gateways](#)

## All matches to this query

| Score | Mr(calc):   | Delta     | Sequence                      |
|-------|-------------|-----------|-------------------------------|
| 61.9  | 1405.770416 | 0.000392  | <a href="#">ILEIEDLFSSLK</a>  |
| 9.4   | 1405.775146 | -0.004338 | <a href="#">LPQLMAPTPPGLR</a> |
| 8.8   | 1405.767761 | 0.003047  | <a href="#">LLAPGVDPSPRR</a>  |
| 8.8   | 1405.767761 | 0.003047  | <a href="#">LLAPGVDPSPRR</a>  |
| 8.3   | 1405.775146 | -0.004338 | <a href="#">LPQLMAPTPPGLR</a> |
| 4.3   | 1405.767761 | 0.003047  | <a href="#">LLAPGVDPSPRR</a>  |
| 3.3   | 1405.757843 | 0.012965  | <a href="#">IIAERHFDHLR</a>   |
| 3.3   | 1405.767761 | 0.003047  | <a href="#">LLAPGVDPSPRR</a>  |
| 3.3   | 1405.767761 | 0.003047  | <a href="#">LLAPGVDPSPRR</a>  |
| 3.0   | 1405.767715 | 0.003093  | <a href="#">LPPAAEPAERALR</a> |

**MASCOT** **SCIENCE** Mascot Search Results

Peptide View

MS/MS Fragmentation of **DAADLLSPLALLR**

Found in **MFS10\_HUMAN**, Major facilitator superfamily domain-containing protein 10 OS=Homo sapiens GN=MFS10 PE=2 SV=1

Match to Query 38467: 1366.786628 from(684.400590,2+) rtinseconds(4331) index(63086)

Title: Locus:1.1.1.3067.14

Data file 2011-11-14 - TFD - EP 7-1.mgf

Click mouse within plot area to zoom in by factor of two about that point

Or, Plot from  to  Da

Label all possible matches  Label matches used for scoring

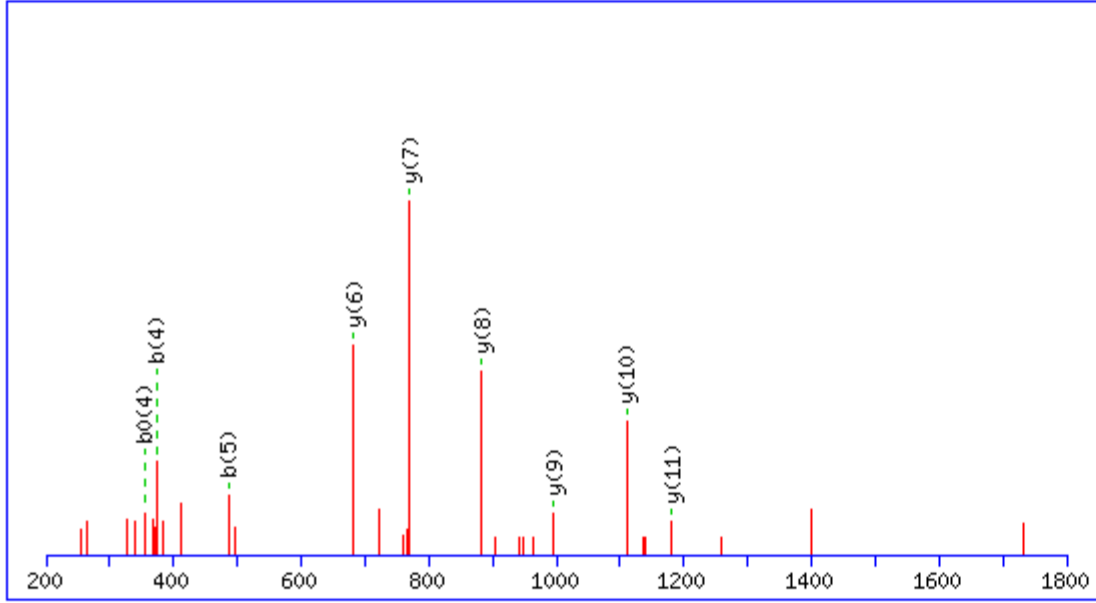

Monoisotopic mass of neutral peptide Mr(calc): 1366.781982

Fixed modifications: Propionamide (C) (apply to specified residues or termini only)

Ions Score: 55 Expect: 1.1e-005

Matches : 9/108 fragment ions using 10 most intense peaks [\(help\)](#)

| #  | b                 | b <sup>++</sup> | b <sup>0</sup>    | b <sup>0++</sup> | Seq. | y                  | y <sup>++</sup> | y <sup>*</sup> | y <sup>+++</sup> | y <sup>0</sup> | y <sup>0++</sup> | #  |
|----|-------------------|-----------------|-------------------|------------------|------|--------------------|-----------------|----------------|------------------|----------------|------------------|----|
| 1  | 116.034219        | 58.520748       | 98.023654         | 49.515465        | D    |                    |                 |                |                  |                |                  | 13 |
| 2  | 187.071333        | 94.039304       | 169.060768        | 85.034022        | A    | 1252.762349        | 626.884812      | 1235.735800    | 618.371538       | 1234.751784    | 617.879530       | 12 |
| 3  | 258.108447        | 129.557862      | 240.097882        | 120.552579       | A    | <b>1181.725235</b> | 591.366255      | 1164.698686    | 582.852981       | 1163.714670    | 582.360973       | 11 |
| 4  | <b>373.135390</b> | 187.071333      | <b>355.124825</b> | 178.066051       | D    | <b>1110.688121</b> | 555.847698      | 1093.661572    | 547.334424       | 1092.677556    | 546.842416       | 10 |
| 5  | <b>486.219454</b> | 243.613365      | 468.208889        | 234.608083       | L    | <b>995.661178</b>  | 498.334227      | 978.634629     | 489.820952       | 977.650613     | 489.328944       | 9  |
| 6  | 599.303518        | 300.155397      | 581.292953        | 291.150115       | L    | <b>882.577114</b>  | 441.792195      | 865.550565     | 433.278920       | 864.566549     | 432.786912       | 8  |
| 7  | 686.335546        | 343.671411      | 668.324981        | 334.666129       | S    | <b>769.493050</b>  | 385.250163      | 752.466501     | 376.736888       | 751.482485     | 376.244880       | 7  |
| 8  | 783.388310        | 392.197793      | 765.377745        | 383.192511       | P    | <b>682.461022</b>  | 341.734149      | 665.434473     | 333.220874       |                |                  | 6  |
| 9  | 896.472374        | 448.739825      | 878.461809        | 439.734543       | L    | 585.408258         | 293.207767      | 568.381709     | 284.694492       |                |                  | 5  |
| 10 | 967.509488        | 484.258382      | 949.498923        | 475.253100       | A    | 472.324194         | 236.665735      | 455.297645     | 228.152460       |                |                  | 4  |
| 11 | 1080.593552       | 540.800414      | 1062.582987       | 531.795132       | L    | 401.287080         | 201.147178      | 384.260531     | 192.633903       |                |                  | 3  |
| 12 | 1193.677616       | 597.342446      | 1175.667051       | 588.337163       | L    | 288.203016         | 144.605146      | 271.176467     | 136.091871       |                |                  | 2  |
| 13 |                   |                 |                   |                  | R    | 175.118952         | 88.063114       | 158.092403     | 79.549839        |                |                  | 1  |

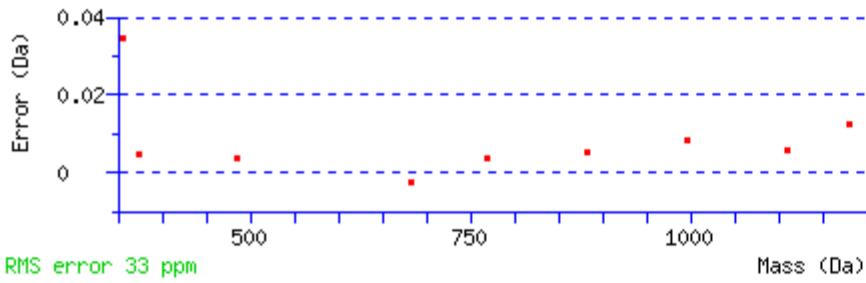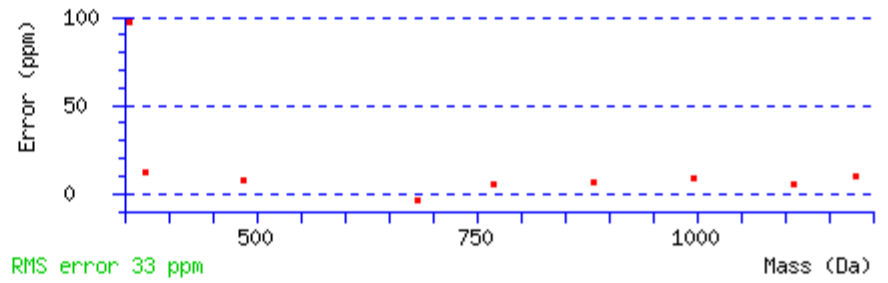

NCBI BLAST search of **DAADLLSPLALLR**

(Parameters: blastp, nr protein database, expect=20000, no filter, PAM30)

Other BLAST [web gateways](#)

All matches to this query

| Score | Mr(calc):   | Delta     | Sequence                      |
|-------|-------------|-----------|-------------------------------|
| 55.0  | 1366.781982 | 0.004646  | <a href="#">DAADLLSPLALLR</a> |
| 6.8   | 1366.786011 | 0.000617  | <a href="#">GEVWALLLEIPK</a>  |
| 6.0   | 1366.797241 | -0.010613 | <a href="#">WQKVLNPELIK</a>   |
| 1.9   | 1366.775467 | 0.011161  | <a href="#">NHVRVMELLK</a>    |

Mascot: <http://www.matrixscience.com/>

# MASCOT SCIENCE Mascot Search Results

## Peptide View

MS/MS Fragmentation of **ICDFGLAR**

Found in **FLT3\_HUMAN**, Receptor-type tyrosine-protein kinase FLT3 OS=Homo sapiens GN=FLT3 PE=1 SV=2

Match to Query 6962: 950.467508 from(476.241030,2+) rtinseconds(2069) index(23881)

Title: Locus:1.1.1.1233.11

Data file 2012-01-27 - TFD - Epitel - IEC - 10ul - 3.mgf

Click mouse within plot area to zoom in by factor of two about that point

Or, Plot from  to  Da

Label all possible matches  Label matches used for scoring

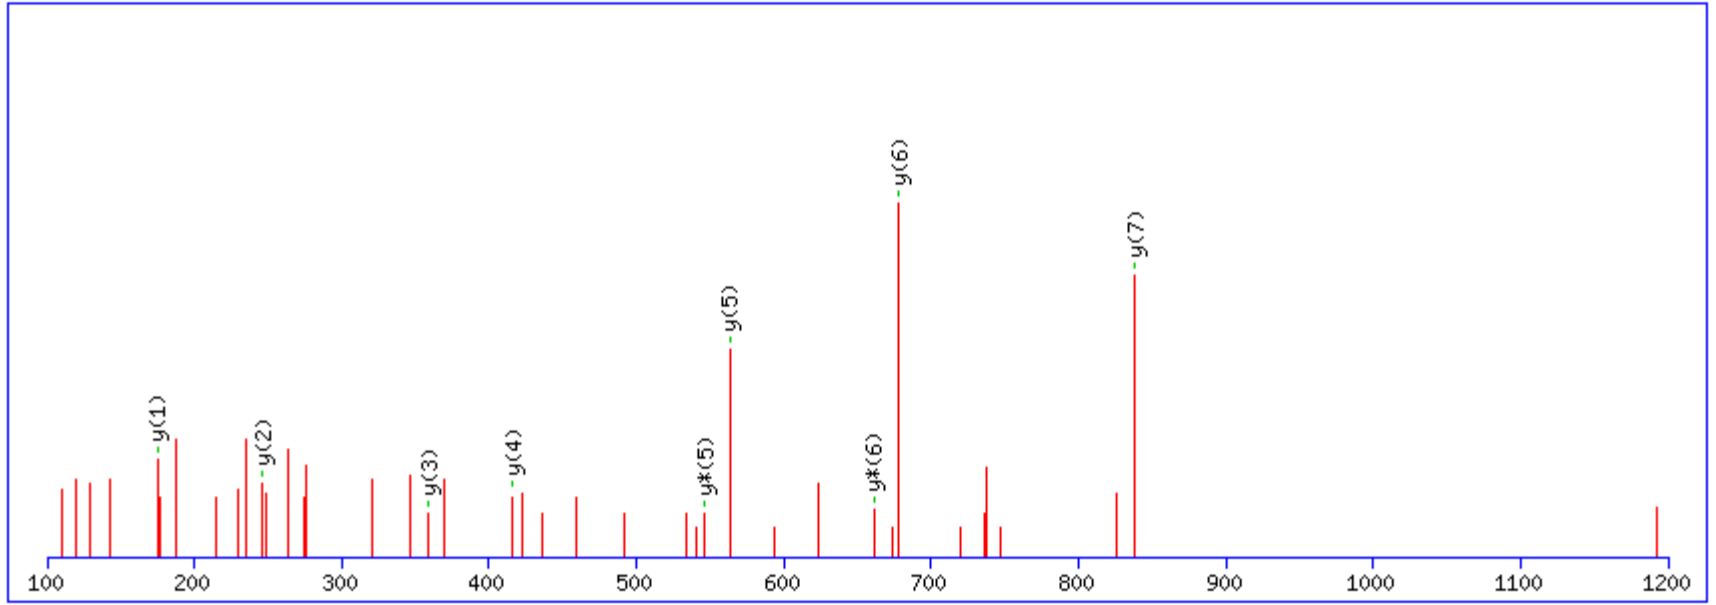

Monoisotopic mass of neutral peptide Mr(calc): 950.464386

Fixed modifications: Carbamidomethyl (C) (apply to specified residues or termini only)

Ions Score: 33 Expect: 0.0063

Matches : 9/56 fragment ions using 30 most intense peaks [\(help\)](#)

| # | b          | b <sup>++</sup> | b <sup>0</sup> | b <sup>0++</sup> | Seq. | y          | y <sup>++</sup> | y <sup>*</sup> | y <sup>*++</sup> | y <sup>0</sup> | y <sup>0++</sup> | # |
|---|------------|-----------------|----------------|------------------|------|------------|-----------------|----------------|------------------|----------------|------------------|---|
| 1 | 114.091340 | 57.549308       |                |                  | I    |            |                 |                |                  |                |                  | 8 |
| 2 | 274.121989 | 137.564632      |                |                  | C    | 838.387600 | 419.697438      | 821.361051     | 411.184164       | 820.377035     | 410.692156       | 7 |
| 3 | 389.148932 | 195.078104      | 371.138367     | 186.072822       | D    | 678.356951 | 339.682114      | 661.330402     | 331.168839       | 660.346386     | 330.676831       | 6 |
| 4 | 536.217346 | 268.612311      | 518.206781     | 259.607029       | F    | 563.330008 | 282.168642      | 546.303459     | 273.655368       |                |                  | 5 |
| 5 | 593.238810 | 297.123043      | 575.228245     | 288.117761       | G    | 416.261594 | 208.634435      | 399.235045     | 200.121161       |                |                  | 4 |
| 6 | 706.322874 | 353.665075      | 688.312309     | 344.659793       | L    | 359.240130 | 180.123703      | 342.213581     | 171.610429       |                |                  | 3 |
| 7 | 777.359988 | 389.183632      | 759.349423     | 380.178350       | A    | 246.156066 | 123.581671      | 229.129517     | 115.068397       |                |                  | 2 |
| 8 |            |                 |                |                  | R    | 175.118952 | 88.063114       | 158.092403     | 79.549840        |                |                  | 1 |

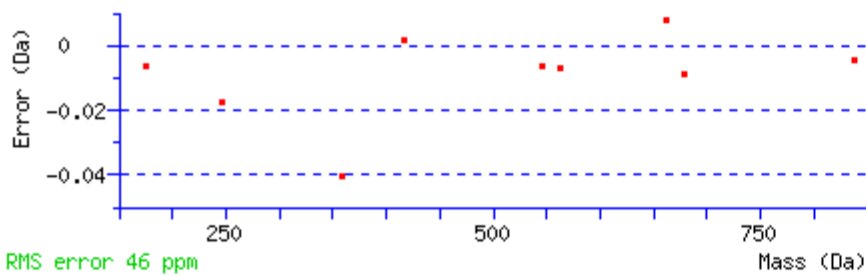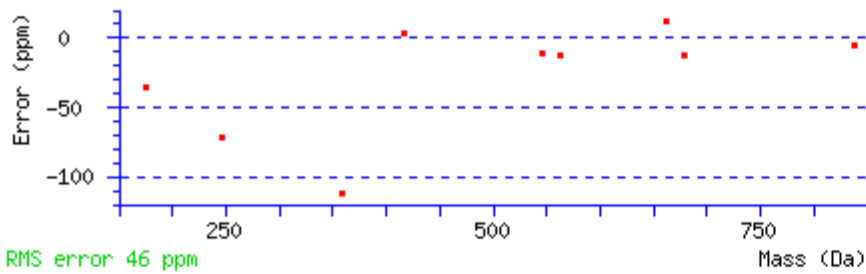

NCBI BLAST search of [ICDFGLAR](#)

(Parameters: blastp, nr protein database, expect=20000, no filter, PAM30)

Other BLAST [web gateways](#)

## All matches to this query

| Score | Mr(calc):  | Delta     | Sequence                 |
|-------|------------|-----------|--------------------------|
| 33.0  | 950.464386 | 0.003122  | <a href="#">ICDFGLAR</a> |
| 33.0  | 950.464386 | 0.003122  | <a href="#">LCDFGLAR</a> |
| 9.0   | 950.464386 | 0.003122  | <a href="#">IQMTWTR</a>  |
| 1.4   | 950.464386 | 0.003122  | <a href="#">MKPGFSPR</a> |
| 0.5   | 950.474258 | -0.006750 | <a href="#">SSKPIMEK</a> |

# **MASCOT** Mascot Search Results

## Peptide View

MS/MS Fragmentation of **LMTGVISPER**

Found in **MELK\_HUMAN**, Maternal embryonic leucine zipper kinase OS=Homo sapiens GN=MELK PE=1 SV=3

Match to Query 397083: 1101.581828 from(551.798190,2+) rtinseconds(2414) index(683820)

Title: Locus:1.1.1.1591.18

Data file C:\Program Files (x86)\Matrix Science\Mascot Daemon\mgf3 TFD - Epitel - R2\mascot\_daemon\_merge.mgf

Click mouse within plot area to zoom in by factor of two about that point

Or, Plot from  to  Da

Label all possible matches  Label matches used for scoring

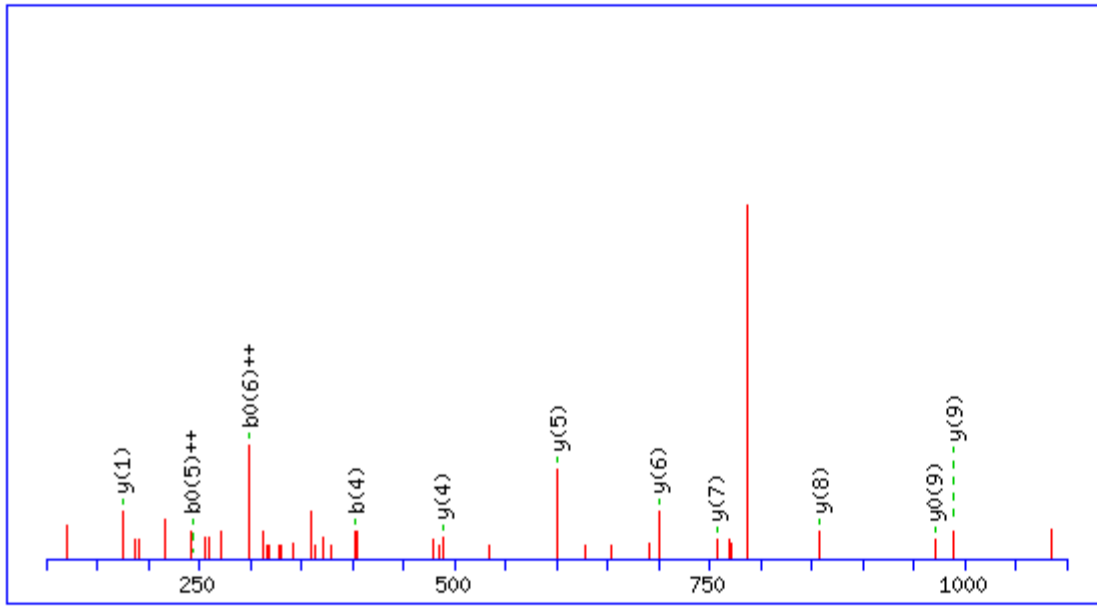

Monoisotopic mass of neutral peptide Mr(calc): 1101.585220

Fixed modifications: Carbamidomethyl (C) (apply to specified residues or termini only)

Ions Score: 45 Expect: 0.00055

Matches : 11/84 fragment ions using 18 most intense peaks ([help](#))

| #  | b          | b <sup>++</sup> | b <sup>0</sup> | b <sup>0++</sup> | Seq. | y          | y <sup>++</sup> | y <sup>*</sup> | y <sup>*++</sup> | y <sup>0</sup> | y <sup>0++</sup> | #  |
|----|------------|-----------------|----------------|------------------|------|------------|-----------------|----------------|------------------|----------------|------------------|----|
| 1  | 114.091340 | 57.549308       |                |                  | L    |            |                 |                |                  |                |                  | 10 |
| 2  | 245.131825 | 123.069550      |                |                  | M    | 989.508443 | 495.257860      | 972.481894     | 486.744585       | 971.497878     | 486.252577       | 9  |
| 3  | 346.179504 | 173.593390      | 328.168939     | 164.588108       | T    | 858.467958 | 429.737617      | 841.441409     | 421.224343       | 840.457393     | 420.732335       | 8  |
| 4  | 403.200968 | 202.104122      | 385.190403     | 193.098840       | G    | 757.420279 | 379.213778      | 740.393730     | 370.700503       | 739.409714     | 370.208495       | 7  |
| 5  | 502.269382 | 251.638329      | 484.258817     | 242.633047       | V    | 700.398815 | 350.703046      | 683.372266     | 342.189771       | 682.388250     | 341.697763       | 6  |
| 6  | 615.353446 | 308.180361      | 597.342881     | 299.175079       | I    | 601.330401 | 301.168839      | 584.303852     | 292.655564       | 583.319836     | 292.163556       | 5  |
| 7  | 702.385474 | 351.696375      | 684.374909     | 342.691093       | S    | 488.246337 | 244.626806      | 471.219788     | 236.113532       | 470.235772     | 235.621524       | 4  |
| 8  | 799.438238 | 400.222757      | 781.427673     | 391.217475       | P    | 401.214309 | 201.110792      | 384.187760     | 192.597518       | 383.203744     | 192.105510       | 3  |
| 9  | 928.480831 | 464.744054      | 910.470266     | 455.738771       | E    | 304.161545 | 152.584410      | 287.134996     | 144.071136       | 286.150980     | 143.579128       | 2  |
| 10 |            |                 |                |                  | R    | 175.118952 | 88.063114       | 158.092403     | 79.549839        |                |                  | 1  |

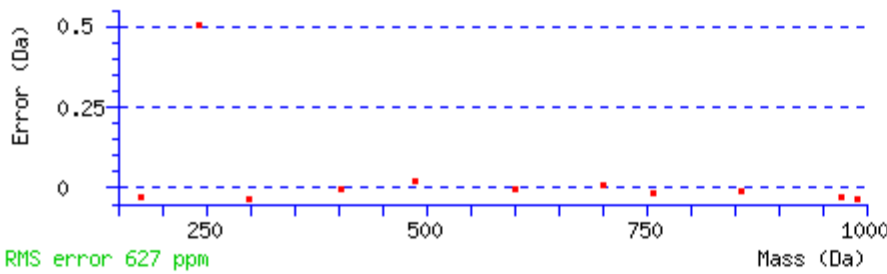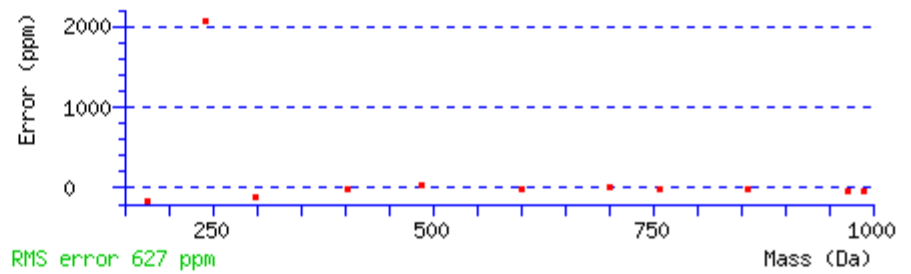

NCBI BLAST search of **LMTGVISPER**

(Parameters: blastp, nr protein database, expect=20000, no filter, PAM30)

Other BLAST [web gateways](#)

## All matches to this query

| Score | Mr(calc):   | Delta     | Sequence                    |
|-------|-------------|-----------|-----------------------------|
| 44.9  | 1101.585220 | -0.003392 | <a href="#">LMTGVISPER</a>  |
| 11.0  | 1101.581848 | -0.000020 | <a href="#">LLFNPDRLR</a>   |
| 10.7  | 1101.577820 | 0.004008  | <a href="#">LDSISGNLQR</a>  |
| 9.6   | 1101.577820 | 0.004008  | <a href="#">INANTISPR</a>   |
| 7.6   | 1101.571945 | 0.009883  | <a href="#">LPSYHKWR</a>    |
| 5.8   | 1101.585190 | -0.003362 | <a href="#">LAEEMLGLAR</a>  |
| 5.5   | 1101.577805 | 0.004023  | <a href="#">LDRTIAEER</a>   |
| 5.2   | 1101.586563 | -0.004735 | <a href="#">LCVIHHPAR</a>   |
| 4.5   | 1101.577835 | 0.003993  | <a href="#">LASAGVDTNVR</a> |
| 3.1   | 1101.577835 | 0.003993  | <a href="#">PSSVTALGQAR</a> |

Mascot: <http://www.matrixscience.com/>

# MASCOT SCIENCE Mascot Search Results

## Peptide View

### MS/MS Fragmentation of GLPASINTAYER

Found in **MMP14\_HUMAN**, Matrix metalloproteinase-14 OS=Homo sapiens GN=MMP14 PE=1 SV=3

Match to Query 32740: 1290.651988 from(646.333270,2+) rtinseconds(2119) index(25536)

Title: Locus:1.1.1.2225.41

Data file 2011-11-10 - TFD - EP 3-3.mgf

Click mouse within plot area to zoom in by factor of two about that point

Or, Plot from  to  Da

Label all possible matches  Label matches used for scoring

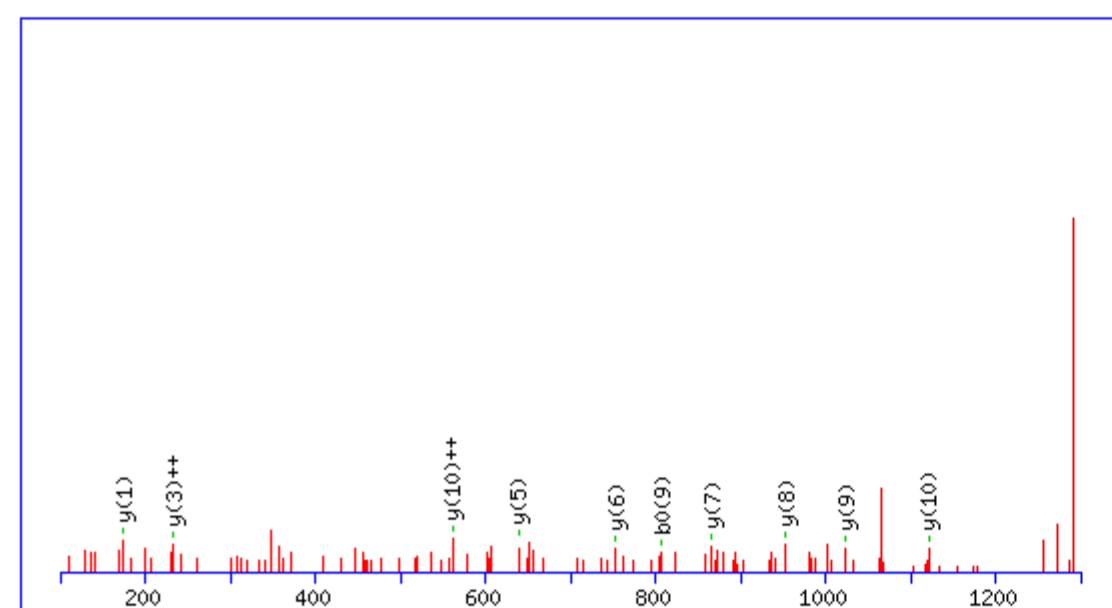

Monoisotopic mass of neutral peptide Mr(calc): 1290.656784

Fixed modifications: Propionamide (C) (apply to specified residues or termini only)

Ions Score: 33 Expect: 0.0019

Matches : 10/110 fragment ions using 24 most intense peaks ([help](#))

| #  | b           | b <sup>++</sup> | b <sup>*</sup> | b <sup>*++</sup> | b <sup>0</sup>    | b <sup>0++</sup> | Seq. | y                  | y <sup>++</sup>   | y <sup>*</sup> | y <sup>*++</sup> | y <sup>0</sup> | y <sup>0++</sup> | #  |
|----|-------------|-----------------|----------------|------------------|-------------------|------------------|------|--------------------|-------------------|----------------|------------------|----------------|------------------|----|
| 1  | 58.028740   | 29.518008       |                |                  |                   |                  | G    |                    |                   |                |                  |                |                  | 12 |
| 2  | 171.112804  | 86.060040       |                |                  |                   |                  | L    | 1234.642628        | 617.824952        | 1217.616079    | 609.311677       | 1216.632063    | 608.819669       | 11 |
| 3  | 268.165568  | 134.586422      |                |                  |                   |                  | P    | <b>1121.558564</b> | <b>561.282920</b> | 1104.532015    | 552.769645       | 1103.547999    | 552.277637       | 10 |
| 4  | 339.202682  | 170.104979      |                |                  |                   |                  | A    | <b>1024.505800</b> | 512.756538        | 1007.479251    | 504.243263       | 1006.495235    | 503.751255       | 9  |
| 5  | 426.234710  | 213.620993      |                |                  | 408.224145        | 204.615710       | S    | <b>953.468686</b>  | 477.237981        | 936.442137     | 468.724706       | 935.458121     | 468.232698       | 8  |
| 6  | 539.318774  | 270.163025      |                |                  | 521.308209        | 261.157742       | I    | <b>866.436658</b>  | 433.721967        | 849.410109     | 425.208692       | 848.426093     | 424.716684       | 7  |
| 7  | 653.361701  | 327.184488      | 636.335152     | 318.671214       | 635.351136        | 318.179206       | N    | <b>753.352594</b>  | 377.179935        | 736.326045     | 368.666660       | 735.342029     | 368.174652       | 6  |
| 8  | 754.409380  | 377.708328      | 737.382831     | 369.195053       | 736.398815        | 368.703045       | T    | <b>639.309667</b>  | 320.158471        | 622.283118     | 311.645197       | 621.299102     | 311.153189       | 5  |
| 9  | 825.446494  | 413.226885      | 808.419945     | 404.713610       | <b>807.435929</b> | 404.221602       | A    | 538.261988         | 269.634632        | 521.235439     | 261.121357       | 520.251423     | 260.629349       | 4  |
| 10 | 988.509823  | 494.758549      | 971.483274     | 486.245275       | 970.499258        | 485.753267       | Y    | 467.224874         | <b>234.116075</b> | 450.198325     | 225.602800       | 449.214309     | 225.110792       | 3  |
| 11 | 1117.552416 | 559.279846      | 1100.525867    | 550.766571       | 1099.541851       | 550.274563       | E    | 304.161545         | 152.584410        | 287.134996     | 144.071136       | 286.150980     | 143.579128       | 2  |
| 12 |             |                 |                |                  |                   |                  | R    | <b>175.118952</b>  | 88.063114         | 158.092403     | 79.549839        |                |                  | 1  |

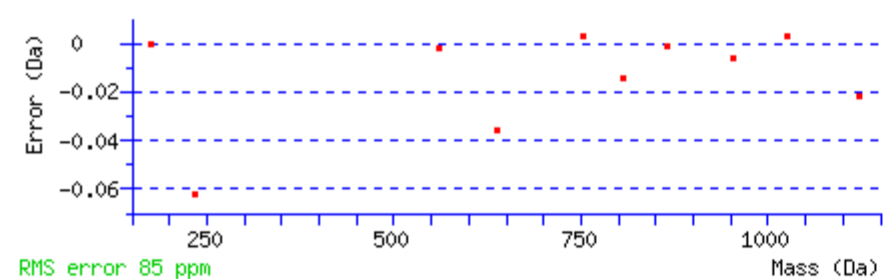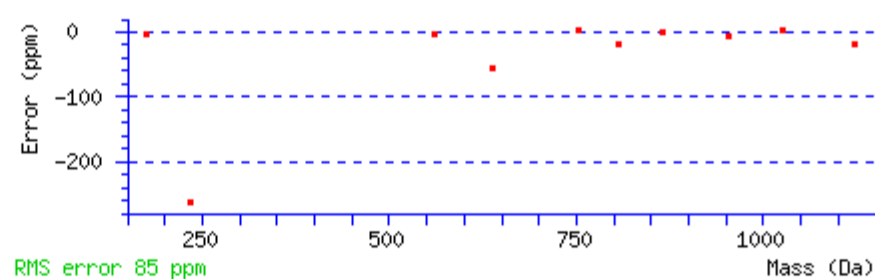

### NCBI BLAST search of GLPASINTAYER

(Parameters: blastp, nr protein database, expect=20000, no filter, PAM30)

Other BLAST [web gateways](#)

### All matches to this query

| Score | Mr(calc):   | Delta     | Sequence                     |
|-------|-------------|-----------|------------------------------|
| 32.7  | 1290.656784 | -0.004796 | <a href="#">GLPASINTAYER</a> |
| 3.5   | 1290.660156 | -0.008168 | <a href="#">LIEERDTLMR</a>   |
| 2.0   | 1290.656815 | -0.004827 | <a href="#">KPPSVFGSTAER</a> |
| 2.0   | 1290.656815 | -0.004827 | <a href="#">KPPSVFGSTAER</a> |

**Peptide View**

MS/MS Fragmentation of **DLKDSSIEMELR**

Found in **MGAP\_HUMAN**, MAX gene-associated protein OS=Homo sapiens GN=MGA PE=1 SV=2

Match to Query 48438: 1450.692908 from(726.353730,2+) rtinseconds(3983) index(49902)

Title: Locus:1.1.1.2764.13

Data file 2011-11-10 - TFD - EP 4-6.mgf

Click mouse within plot area to zoom in by factor of two about that point

Or, Plot from  to  Da

Label all possible matches  Label matches used for scoring

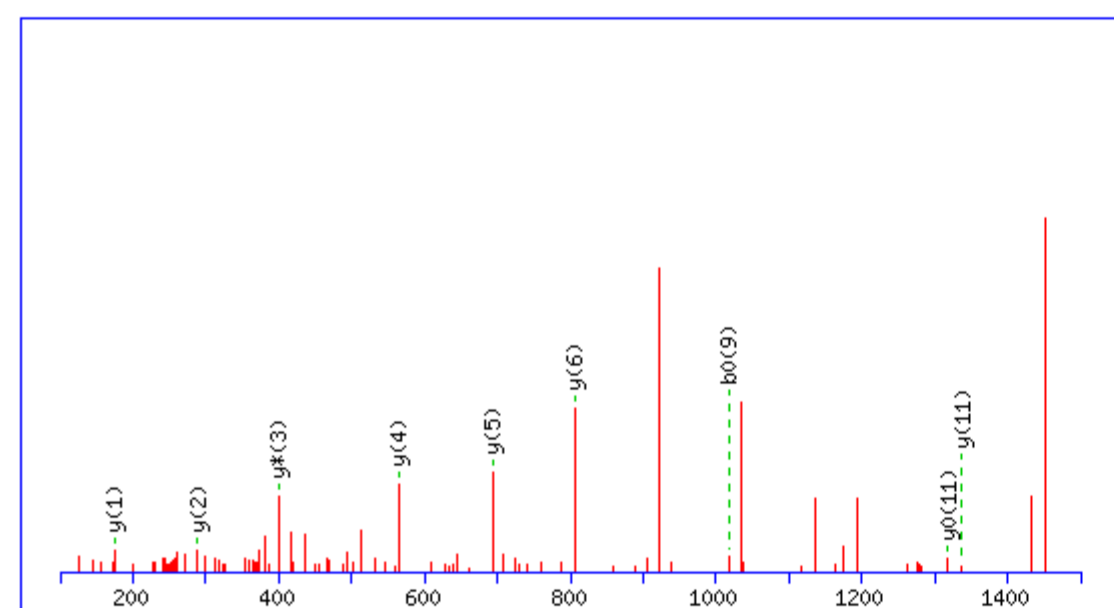

Monoisotopic mass of neutral peptide Mr(calc): 1450.697327

Fixed modifications: Propionamide (C) (apply to specified residues or termini only)

Variable modifications:

M9 : Oxidation (M), with neutral losses 0.000000 (shown in table), 63.998285

Ions Score: 38 Expect: 0.0023

Matches : 9/190 fragment ions using 14 most intense peaks [\(help\)](#)

| #  | b           | b <sup>++</sup> | b*          | b <sup>+++</sup> | b <sup>0</sup> | b <sup>0++</sup> | Seq. | y           | y <sup>++</sup> | y*          | y <sup>+++</sup> | y <sup>0</sup> | y <sup>0++</sup> | #  |
|----|-------------|-----------------|-------------|------------------|----------------|------------------|------|-------------|-----------------|-------------|------------------|----------------|------------------|----|
| 1  | 116.034219  | 58.520748       |             |                  | 98.023654      | 49.515465        | D    |             |                 |             |                  |                |                  | 12 |
| 2  | 229.118283  | 115.062779      |             |                  | 211.107718     | 106.057497       | L    | 1336.677692 | 668.842484      | 1319.651143 | 660.329210       | 1318.667127    | 659.837201       | 11 |
| 3  | 357.213246  | 179.110261      | 340.186697  | 170.596986       | 339.202681     | 170.104978       | K    | 1223.593628 | 612.300452      | 1206.567079 | 603.787178       | 1205.583063    | 603.295170       | 10 |
| 4  | 472.240189  | 236.623732      | 455.213640  | 228.110458       | 454.229624     | 227.618450       | D    | 1095.498665 | 548.252971      | 1078.472116 | 539.739696       | 1077.488100    | 539.247688       | 9  |
| 5  | 559.272217  | 280.139747      | 542.245668  | 271.626472       | 541.261652     | 271.134464       | S    | 980.471722  | 490.739499      | 963.445173  | 482.226225       | 962.461157     | 481.734217       | 8  |
| 6  | 646.304245  | 323.655761      | 629.277696  | 315.142486       | 628.293680     | 314.650478       | S    | 893.439694  | 447.223485      | 876.413145  | 438.710211       | 875.429129     | 438.218203       | 7  |
| 7  | 759.388309  | 380.197793      | 742.361760  | 371.684518       | 741.377744     | 371.192510       | I    | 806.407666  | 403.707471      | 789.381117  | 395.194197       | 788.397101     | 394.702189       | 6  |
| 8  | 888.430902  | 444.719089      | 871.404353  | 436.205815       | 870.420337     | 435.713807       | E    | 693.323602  | 347.165439      | 676.297053  | 338.652165       | 675.313037     | 338.160157       | 5  |
| 9  | 1035.466302 | 518.236789      | 1018.439753 | 509.723515       | 1017.455737    | 509.231507       | M    | 564.281009  | 282.644143      | 547.254460  | 274.130868       | 546.270444     | 273.638860       | 4  |
| 10 | 1164.508895 | 582.758086      | 1147.482346 | 574.244811       | 1146.498330    | 573.752803       | E    | 417.245609  | 209.126442      | 400.219060  | 200.613168       | 399.235044     | 200.121160       | 3  |
| 11 | 1277.592959 | 639.300118      | 1260.566410 | 630.786843       | 1259.582394    | 630.294835       | L    | 288.203016  | 144.605146      | 271.176467  | 136.091871       |                |                  | 2  |
| 12 |             |                 |             |                  |                |                  | R    | 175.118952  | 88.063114       | 158.092403  | 79.549839        |                |                  | 1  |

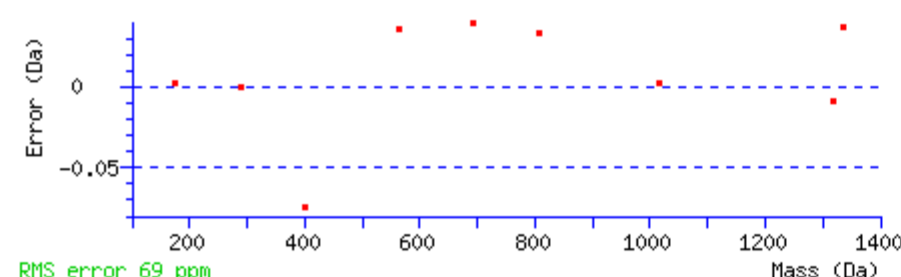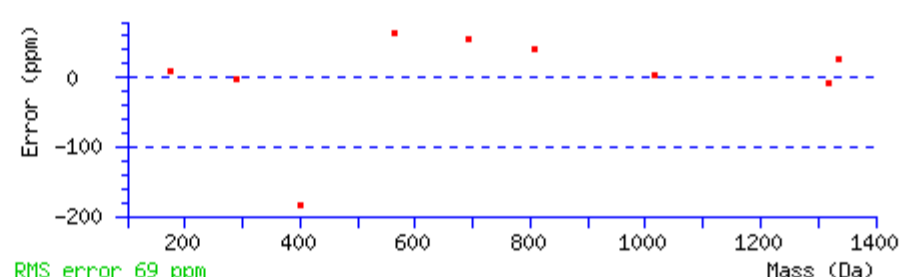

NCBI BLAST search of [DLKDSSIEMELR](#)

(Parameters: blastp, nr protein database, expect=20000, no filter, PAM30)

Other BLAST [web gateways](#)

**All matches to this query**

| Score | Mr(calc):   | Delta     | Sequence                       |
|-------|-------------|-----------|--------------------------------|
| 37.7  | 1450.697327 | -0.004419 | <a href="#">DLKDSSIEMELR</a>   |
| 16.8  | 1450.698685 | -0.005777 | <a href="#">NFQLMRDLQQR</a>    |
| 15.1  | 1450.705231 | -0.012323 | <a href="#">SQTTSLENGVFPR</a>  |
| 11.3  | 1450.695358 | -0.002450 | <a href="#">DGKVDGPHFGPPGR</a> |
| 11.3  | 1450.695358 | -0.002450 | <a href="#">DGKVDGPHFGPPGR</a> |
| 10.3  | 1450.691299 | 0.001609  | <a href="#">SSOPTQPEPRHR</a>   |
| 7.3   | 1450.706070 | -0.013162 | <a href="#">MNMPFVKLENR</a>    |
| 7.3   | 1450.706070 | -0.013162 | <a href="#">MNMPFVKLENR</a>    |
| 7.3   | 1450.706070 | -0.013162 | <a href="#">MNMPFVKLENR</a>    |
| 6.6   | 1450.697342 | -0.004434 | <a href="#">CLPKSDSSSLPK</a>   |



# MASCOT Search Results

## Peptide View

MS/MS Fragmentation of **VGTVTMGPSAR**

Found in **MED20\_HUMAN**, Mediator of RNA polymerase II transcription subunit 20 OS=Homo sapiens GN=MED20 PE=1 SV=1

Match to Query 21483: 1090.545428 from(546.279990,2+) rtinseconds(970) index(1807)

Title: Locus:1.1.1.1787.33

Data file 2011-11-13 - TFD - EP 7-5.mgf

Click mouse within plot area to zoom in by factor of two about that point

Or, Plot from  to  Da

Label all possible matches  Label matches used for scoring

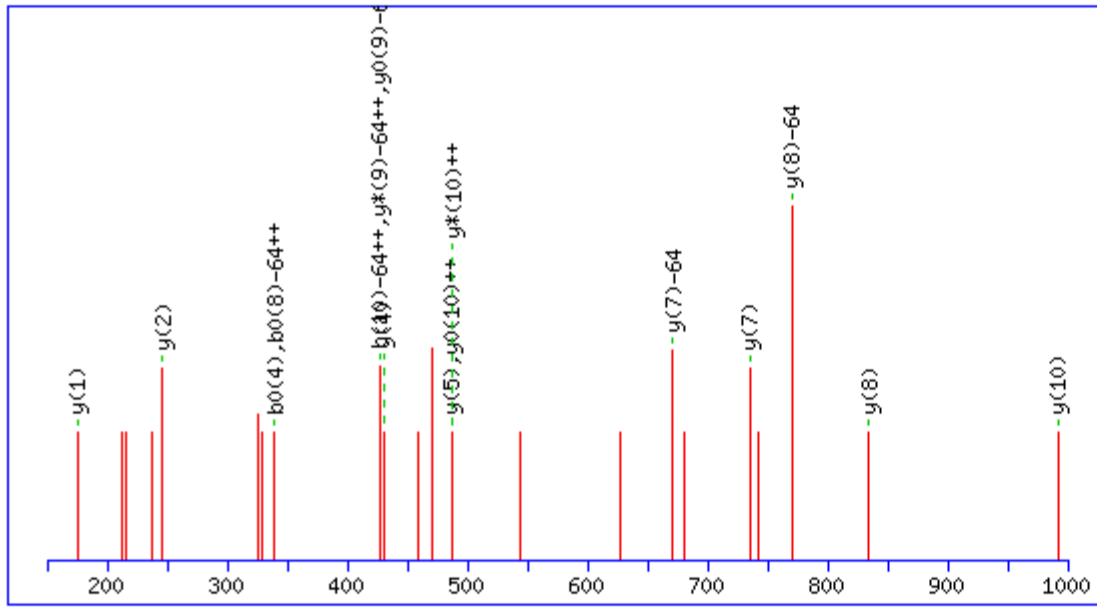

Monoisotopic mass of neutral peptide Mr(calc): 1090.544113

Fixed modifications: Propionamide (C) (apply to specified residues or termini only)

Variable modifications:

M6 : Oxidation (M), with neutral losses 0.000000 (shown in table), 63.998285

Ions Score: 47 Expect: 0.00091

Matches : 16/142 fragment ions using 19 most intense peaks [\(help\)](#)

| #  | b          | b <sup>++</sup> | b <sup>0</sup> | b <sup>0++</sup> | Seq. | y          | y <sup>++</sup> | y <sup>*</sup> | y <sup>*++</sup> | y <sup>0</sup> | y <sup>0++</sup> | #  |
|----|------------|-----------------|----------------|------------------|------|------------|-----------------|----------------|------------------|----------------|------------------|----|
| 1  | 100.075690 | 50.541483       |                |                  | V    |            |                 |                |                  |                |                  | 11 |
| 2  | 157.097154 | 79.052215       |                |                  | G    | 992.482958 | 496.745117      | 975.456409     | 488.231843       | 974.472393     | 487.739835       | 10 |
| 3  | 258.144833 | 129.576055      | 240.134268     | 120.570772       | T    | 935.461494 | 468.234385      | 918.434945     | 459.721111       | 917.450929     | 459.229103       | 9  |
| 4  | 357.213247 | 179.110262      | 339.202682     | 170.104979       | V    | 834.413815 | 417.710546      | 817.387266     | 409.197271       | 816.403250     | 408.705263       | 8  |
| 5  | 458.260926 | 229.634101      | 440.250361     | 220.628819       | T    | 735.345401 | 368.176339      | 718.318852     | 359.663064       | 717.334836     | 359.171056       | 7  |
| 6  | 605.296326 | 303.151801      | 587.285761     | 294.146519       | M    | 634.297722 | 317.652499      | 617.271173     | 309.139225       | 616.287157     | 308.647217       | 6  |
| 7  | 662.317790 | 331.662533      | 644.307225     | 322.657251       | G    | 487.262322 | 244.134799      | 470.235773     | 235.621524       | 469.251757     | 235.129516       | 5  |
| 8  | 759.370554 | 380.188915      | 741.359989     | 371.183633       | P    | 430.240858 | 215.624067      | 413.214309     | 207.110792       | 412.230293     | 206.618784       | 4  |
| 9  | 846.402582 | 423.704929      | 828.392017     | 414.699647       | S    | 333.188094 | 167.097685      | 316.161545     | 158.584410       | 315.177529     | 158.092402       | 3  |
| 10 | 917.439696 | 459.223486      | 899.429131     | 450.218204       | A    | 246.156066 | 123.581671      | 229.129517     | 115.068396       |                |                  | 2  |
| 11 |            |                 |                |                  | R    | 175.118952 | 88.063114       | 158.092403     | 79.549839        |                |                  | 1  |

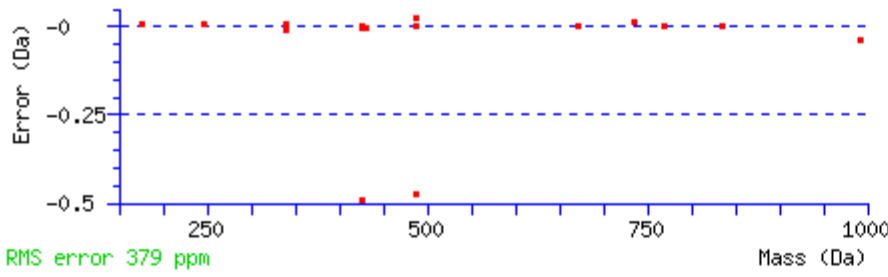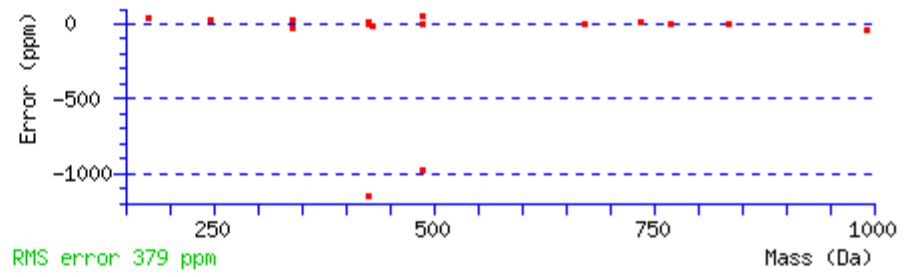

NCBI BLAST search of **VGTVTMGPSAR**

(Parameters: blastp, nr protein database, expect=20000, no filter, PAM30)

Other BLAST [web gateways](#)

All matches to this query

| Score | Mr(calc):   | Delta     | Sequence                    |
|-------|-------------|-----------|-----------------------------|
| 46.5  | 1090.544113 | 0.001315  | <a href="#">VGTVTMGPSAR</a> |
| 23.1  | 1090.544113 | 0.001315  | <a href="#">VGTVTMGPSAR</a> |
| 13.4  | 1090.555328 | -0.009900 | <a href="#">VGTQMERVR</a>   |
| 12.7  | 1090.540741 | 0.004687  | <a href="#">VYPDGNVVR</a>   |
| 10.4  | 1090.540741 | 0.004687  | <a href="#">VIPNGDGTFR</a>  |
| 10.3  | 1090.551971 | -0.006543 | <a href="#">RGPPPPPPGR</a>  |
| 10.3  | 1090.551971 | -0.006543 | <a href="#">RGPPPPPPGR</a>  |
| 9.4   | 1090.540695 | 0.004733  | <a href="#">GEAEFAIGAR</a>  |
| 7.7   | 1090.538239 | 0.007189  | <a href="#">VWMGVWTGR</a>   |
| 7.1   | 1090.551941 | -0.006513 | <a href="#">ADADGRAIFR</a>  |

Mascot: <http://www.matrixscience.com/>

# **MASCOT** Mascot Search Results

## Peptide View

MS/MS Fragmentation of **LQVIDIR**

Found in **TXIP1\_HUMAN**, Translin-associated factor X-interacting protein 1 OS=Homo sapiens GN=TSNAXIP1 PE=2 SV=1

Match to Query 3665: 855.515228 from(428.764890,2+) rtinseconds(1858) index(16880)

Title: Locus:1.1.1.2267.7

Data file 2011-11-12 - TFD - EP 5-1.mgf

Click mouse within plot area to zoom in by factor of two about that point

Or, Plot from  to  Da

Label all possible matches  Label matches used for scoring

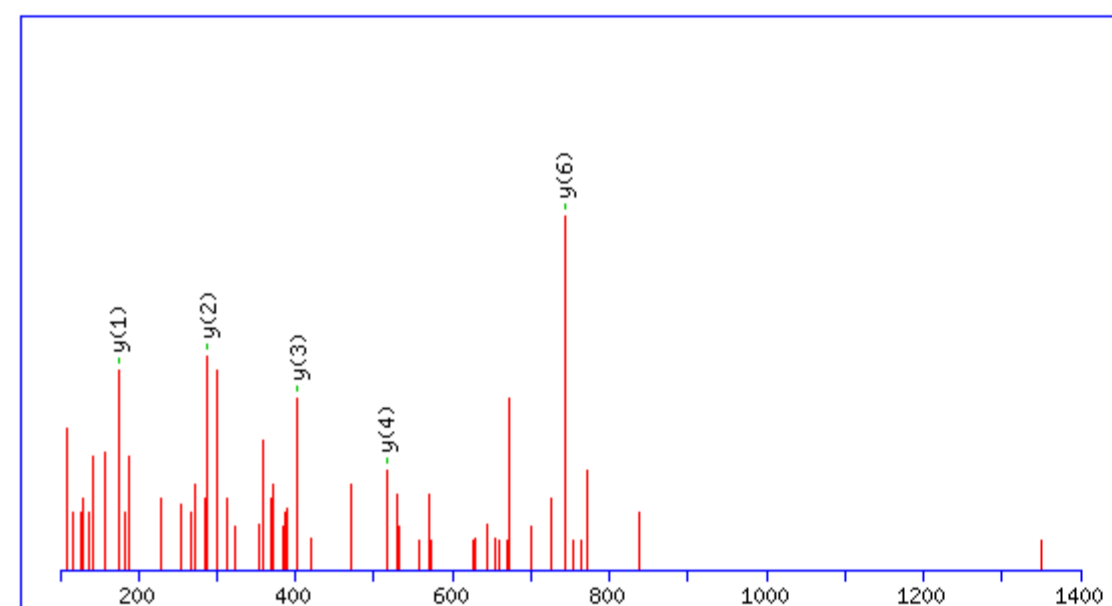

Monoisotopic mass of neutral peptide Mr(calc): 855.517792

Fixed modifications: Propionamide (C) (apply to specified residues or termini only)

Ions Score: 41 Expect: 0.0005

Matches : 5/58 fragment ions using 8 most intense peaks ([help](#))

| # | b          | b <sup>++</sup> | b <sup>*</sup> | b <sup>+++</sup> | b <sup>0</sup> | b <sup>0++</sup> | Seq. | y                 | y <sup>++</sup> | y <sup>*</sup> | y <sup>+++</sup> | y <sup>0</sup> | y <sup>0++</sup> | # |
|---|------------|-----------------|----------------|------------------|----------------|------------------|------|-------------------|-----------------|----------------|------------------|----------------|------------------|---|
| 1 | 114.091340 | 57.549308       |                |                  |                |                  | L    |                   |                 |                |                  |                |                  | 7 |
| 2 | 242.149918 | 121.578597      | 225.123369     | 113.065323       |                |                  | Q    | <b>743.441015</b> | 372.224146      | 726.414466     | 363.710871       | 725.430450     | 363.218863       | 6 |
| 3 | 341.218332 | 171.112804      | 324.191783     | 162.599530       |                |                  | V    | 615.382437        | 308.194857      | 598.355888     | 299.681582       | 597.371872     | 299.189574       | 5 |
| 4 | 454.302396 | 227.654836      | 437.275847     | 219.141562       |                |                  | I    | <b>516.314023</b> | 258.660650      | 499.287474     | 250.147375       | 498.303458     | 249.655367       | 4 |
| 5 | 569.329339 | 285.168308      | 552.302790     | 276.655033       | 551.318774     | 276.163025       | D    | <b>403.229959</b> | 202.118618      | 386.203410     | 193.605343       | 385.219394     | 193.113335       | 3 |
| 6 | 682.413403 | 341.710340      | 665.386854     | 333.197065       | 664.402838     | 332.705057       | I    | <b>288.203016</b> | 144.605146      | 271.176467     | 136.091872       |                |                  | 2 |
| 7 |            |                 |                |                  |                |                  | R    | <b>175.118952</b> | 88.063114       | 158.092403     | 79.549840        |                |                  | 1 |

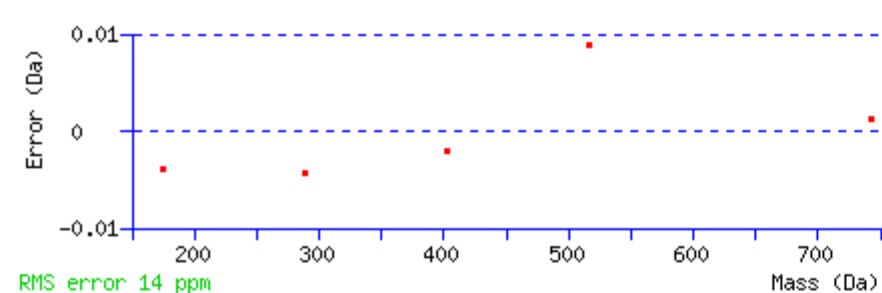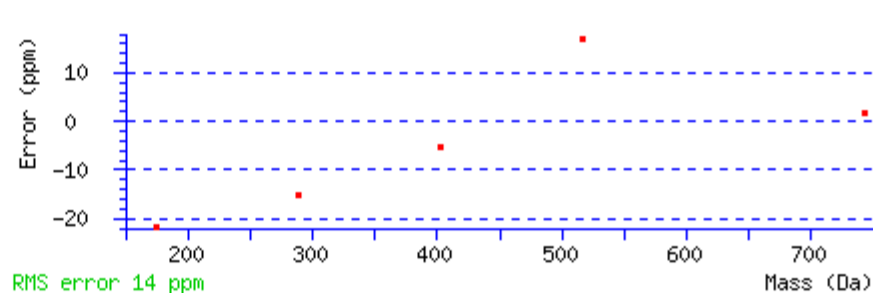

NCBI BLAST search of **LQVIDIR**

(Parameters: blastp, nr protein database, expect=20000, no filter, PAM30)

Other BLAST [web gateways](#)

All matches to this query

| Score | Mr(calc):  | Delta     | Sequence                 |
|-------|------------|-----------|--------------------------|
| 41.0  | 855.517792 | -0.002564 | <a href="#">LQVIDIR</a>  |
| 41.0  | 855.517792 | -0.002564 | <a href="#">LQVLDLR</a>  |
| 12.4  | 855.517792 | -0.002564 | <a href="#">LEVVAGLR</a> |
| 12.4  | 855.517792 | -0.002564 | <a href="#">LLGDLGLR</a> |
| 12.4  | 855.517792 | -0.002564 | <a href="#">LPTPKLR</a>  |
| 12.4  | 855.517792 | -0.002564 | <a href="#">LQILTPR</a>  |
| 12.4  | 855.517792 | -0.002564 | <a href="#">LVLDQLR</a>  |
| 12.2  | 855.517792 | -0.002564 | <a href="#">ILVKPDR</a>  |
| 10.8  | 855.517792 | -0.002564 | <a href="#">VLKDLPR</a>  |
| 10.4  | 855.517792 | -0.002564 | <a href="#">KLVPVER</a>  |

Mascot: <http://www.matrixscience.com/>

# MASCOT SCIENCE Mascot Search Results

## Peptide View

MS/MS Fragmentation of **VLCTPPPK**

Found in **MCP\_HUMAN**, Membrane cofactor protein OS=Homo sapiens GN=CD46 PE=1 SV=3

Match to Query 10119: 924.506568 from(463.260560,2+) rtinseconds(1085) index(4475)

Title: Locus:1.1.1.1909.15

Data file 2011-11-10 - TFD - EP 4-2.mgf

Click mouse within plot area to zoom in by factor of two about that point

Or, Plot from  to  Da

Label all possible matches  Label matches used for scoring

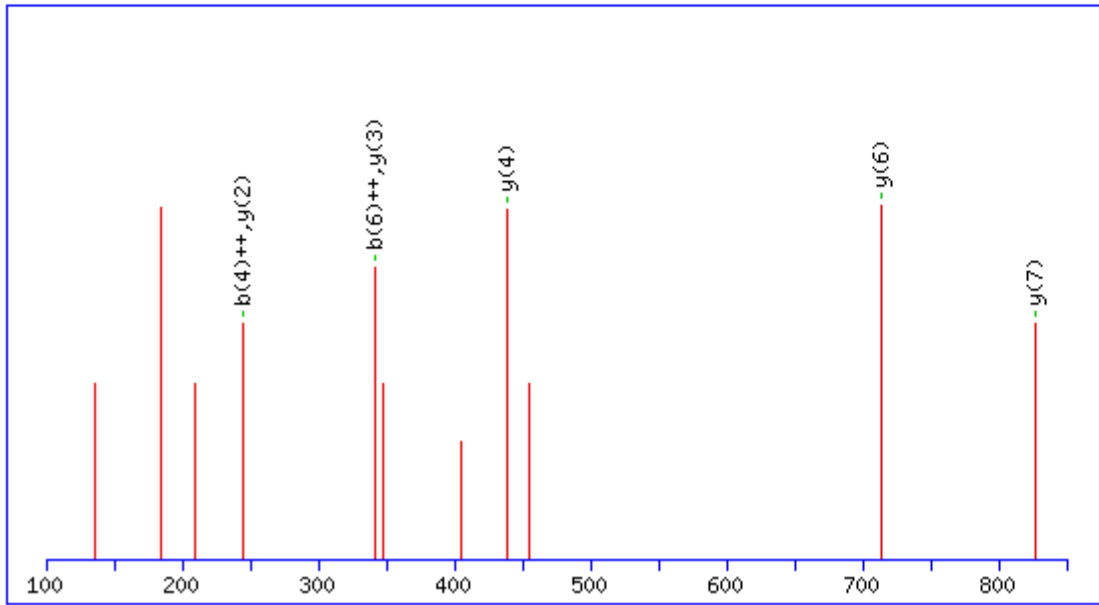

Monoisotopic mass of neutral peptide  $M_r(\text{calc})$ : 924.510269

Fixed modifications: Propionamide (C) (apply to specified residues or termini only)

Ions Score: 46 Expect: 0.00018

Matches : 7/56 fragment ions using 6 most intense peaks [\(help\)](#)

| # | b          | b <sup>++</sup> | b <sup>0</sup> | b <sup>0++</sup> | Seq. | y          | y <sup>++</sup> | y <sup>*</sup> | y <sup>*++</sup> | y <sup>0</sup> | y <sup>0++</sup> | # |
|---|------------|-----------------|----------------|------------------|------|------------|-----------------|----------------|------------------|----------------|------------------|---|
| 1 | 100.075690 | 50.541483       |                |                  | V    |            |                 |                |                  |                |                  | 8 |
| 2 | 213.159754 | 107.083515      |                |                  | L    | 826.449138 | 413.728207      | 809.422589     | 405.214933       | 808.438573     | 404.722925       | 7 |
| 3 | 387.206053 | 194.106664      |                |                  | C    | 713.365074 | 357.186175      | 696.338525     | 348.672901       | 695.354509     | 348.180893       | 6 |
| 4 | 488.253732 | 244.630504      | 470.243167     | 235.625222       | T    | 539.318775 | 270.163026      | 522.292226     | 261.649751       | 521.308210     | 261.157743       | 5 |
| 5 | 585.306496 | 293.156886      | 567.295931     | 284.151604       | P    | 438.271096 | 219.639186      | 421.244547     | 211.125912       |                |                  | 4 |
| 6 | 682.359260 | 341.683268      | 664.348695     | 332.677986       | P    | 341.218332 | 171.112804      | 324.191783     | 162.599530       |                |                  | 3 |
| 7 | 779.412024 | 390.209650      | 761.401459     | 381.204368       | P    | 244.165568 | 122.586422      | 227.139019     | 114.073148       |                |                  | 2 |
| 8 |            |                 |                |                  | K    | 147.112804 | 74.060040       | 130.086255     | 65.546765        |                |                  | 1 |

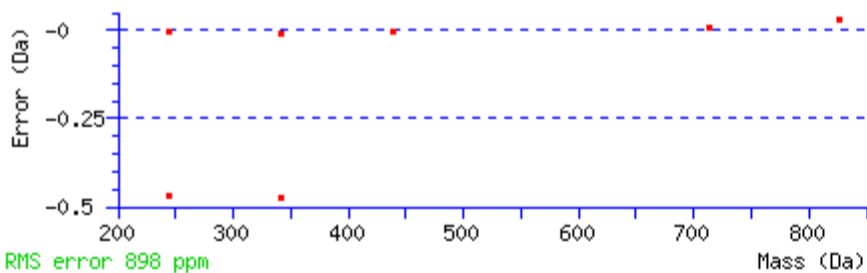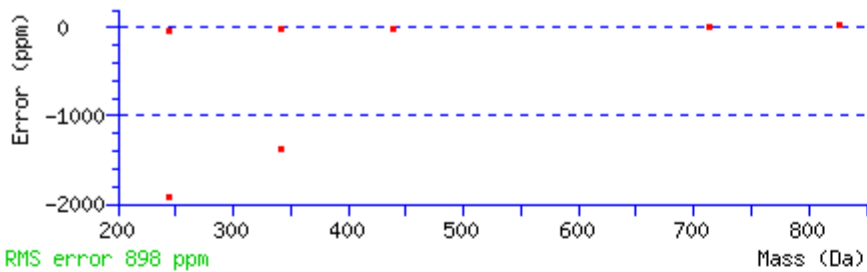

NCBI BLAST search of **VLCTPPPK**

(Parameters: blastp, nr protein database, expect=20000, no filter, PAM30)

Other BLAST [web gateways](#)

## All matches to this query

| Score | $M_r(\text{calc})$ : | Delta     | Sequence                  |
|-------|----------------------|-----------|---------------------------|
| 46.3  | 924.510269           | -0.003701 | <a href="#">VLCTPPPK</a>  |
| 10.1  | 924.500198           | 0.006370  | <a href="#">RGGPRPGGR</a> |
| 10.1  | 924.502869           | 0.003699  | <a href="#">LRDSPPPK</a>  |
| 9.9   | 924.502884           | 0.003684  | <a href="#">ATATPVPPR</a> |
| 9.4   | 924.502869           | 0.003699  | <a href="#">TAAPPAPLR</a> |
| 7.2   | 924.502853           | 0.003715  | <a href="#">LERADPPK</a>  |
| 7.0   | 924.502869           | 0.003699  | <a href="#">VLDLHSNK</a>  |
| 3.1   | 924.502869           | 0.003699  | <a href="#">LRDSPPPK</a>  |
| 2.4   | 924.514114           | -0.007546 | <a href="#">VPPDGRLR</a>  |
| 1.2   | 924.502869           | 0.003699  | <a href="#">VIHEKDGK</a>  |

**Peptide View**

MS/MS Fragmentation of **QIDLSTVDLK**

Found in **MANF\_HUMAN**, Mesencephalic astrocyte-derived neurotrophic factor OS=Homo sapiens GN=MANF PE=1 SV=3

Match to Query 28275: 1130.616008 from(566.315280,2+) rtinseconds(2576) index(31852)

Title: Locus:1.1.1.2200.23

Data file 2011-11-12 - TFD - EP 5-6.mgf

Click mouse within plot area to zoom in by factor of two about that point

Or, Plot from  to  Da

Label all possible matches  Label matches used for scoring

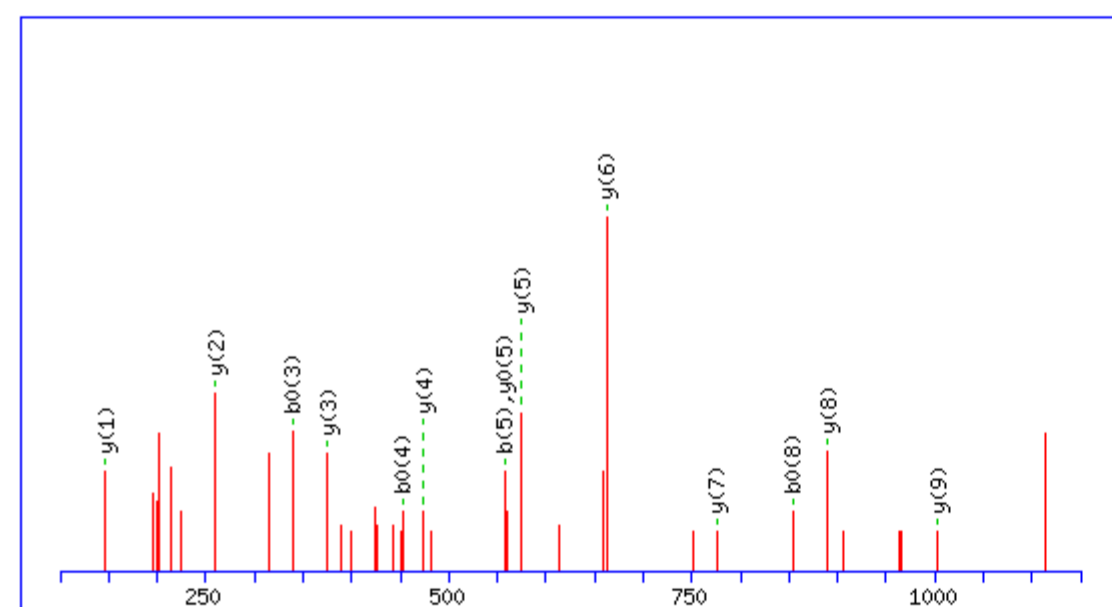

Monoisotopic mass of neutral peptide Mr(calc): 1130.618301

Fixed modifications: Propionamide (C) (apply to specified residues or termini only)

Ions Score: 59 Expect: 1.3e-005

Matches : 14/100 fragment ions using 26 most intense peaks [\(help\)](#)

| #  | b          | b <sup>++</sup> | b*         | b <sup>+++</sup> | b <sup>0</sup> | b <sup>0++</sup> | Seq. | y           | y <sup>++</sup> | y*         | y <sup>+++</sup> | y <sup>0</sup> | y <sup>0++</sup> | #  |
|----|------------|-----------------|------------|------------------|----------------|------------------|------|-------------|-----------------|------------|------------------|----------------|------------------|----|
| 1  | 129.065854 | 65.036565       | 112.039305 | 56.523291        |                |                  | Q    |             |                 |            |                  |                |                  | 10 |
| 2  | 242.149918 | 121.578597      | 225.123369 | 113.065323       |                |                  | I    | 1003.567003 | 502.287140      | 986.540454 | 493.773865       | 985.556438     | 493.281857       | 9  |
| 3  | 357.176861 | 179.092069      | 340.150312 | 170.578794       | 339.166296     | 170.086786       | D    | 890.482939  | 445.745108      | 873.456390 | 437.231833       | 872.472374     | 436.739825       | 8  |
| 4  | 470.260925 | 235.634101      | 453.234376 | 227.120826       | 452.250360     | 226.628818       | L    | 775.455996  | 388.231636      | 758.429447 | 379.718361       | 757.445431     | 379.226353       | 7  |
| 5  | 557.292953 | 279.150115      | 540.266404 | 270.636840       | 539.282388     | 270.144832       | S    | 662.371932  | 331.689604      | 645.345383 | 323.176330       | 644.361367     | 322.684322       | 6  |
| 6  | 658.340632 | 329.673954      | 641.314083 | 321.160680       | 640.330067     | 320.668672       | T    | 575.339904  | 288.173590      | 558.313355 | 279.660315       | 557.329339     | 279.168307       | 5  |
| 7  | 757.409046 | 379.208161      | 740.382497 | 370.694887       | 739.398481     | 370.202879       | V    | 474.292225  | 237.649750      | 457.265676 | 229.136476       | 456.281660     | 228.644468       | 4  |
| 8  | 872.435989 | 436.721633      | 855.409440 | 428.208358       | 854.425424     | 427.716350       | D    | 375.223811  | 188.115543      | 358.197262 | 179.602269       | 357.213246     | 179.110261       | 3  |
| 9  | 985.520053 | 493.263665      | 968.493504 | 484.750390       | 967.509488     | 484.258382       | L    | 260.196868  | 130.602072      | 243.170319 | 122.088797       |                |                  | 2  |
| 10 |            |                 |            |                  |                |                  | K    | 147.112804  | 74.060040       | 130.086255 | 65.546765        |                |                  | 1  |

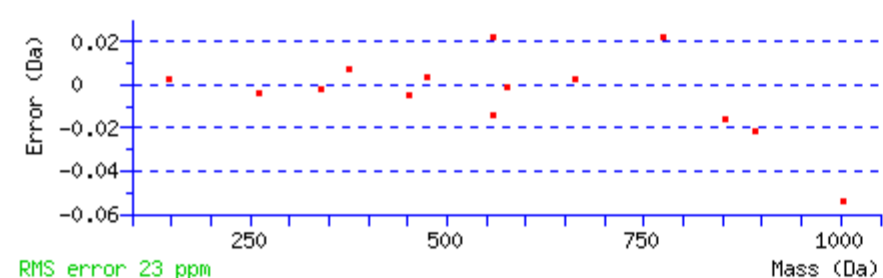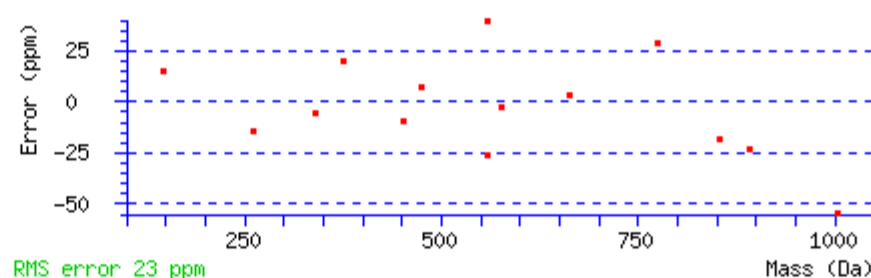

NCBI BLAST search of **QIDLSTVDLK**

(Parameters: blastp, nr protein database, expect=20000, no filter, PAM30)

Other BLAST [web gateways](#)

**All matches to this query**

| Score | Mr(calc):   | Delta     | Sequence                   |
|-------|-------------|-----------|----------------------------|
| 58.8  | 1130.618301 | -0.002293 | <a href="#">QIDLSTVDLK</a> |
| 12.6  | 1130.618271 | -0.002263 | <a href="#">KLEADSLEVK</a> |
| 10.9  | 1130.618286 | -0.002278 | <a href="#">QLGETLTELK</a> |
| 8.8   | 1130.618271 | -0.002263 | <a href="#">KLSDLLEVAK</a> |
| 8.6   | 1130.608398 | 0.007610  | <a href="#">APSPARPFK</a>  |
| 6.8   | 1130.618271 | -0.002263 | <a href="#">DIKSELAEVK</a> |

**Peptide View**

MS/MS Fragmentation of **IQSFLGGAPTEDLK**

Found in **MSLN\_HUMAN**, Mesothelin OS=Homo sapiens GN=MSLN PE=1 SV=2

Match to Query 41405: 1474.760348 from(738.387450,2+) rtinseconds(2609) index(34197)

Title: Locus:1.1.1.1373.38

Data file 2012-01-27 - TFD - Epitel - IEC - 10ul - 2.mgf

Click mouse within plot area to zoom in by factor of two about that point

Or, Plot from  to  Da

Label all possible matches  Label matches used for scoring

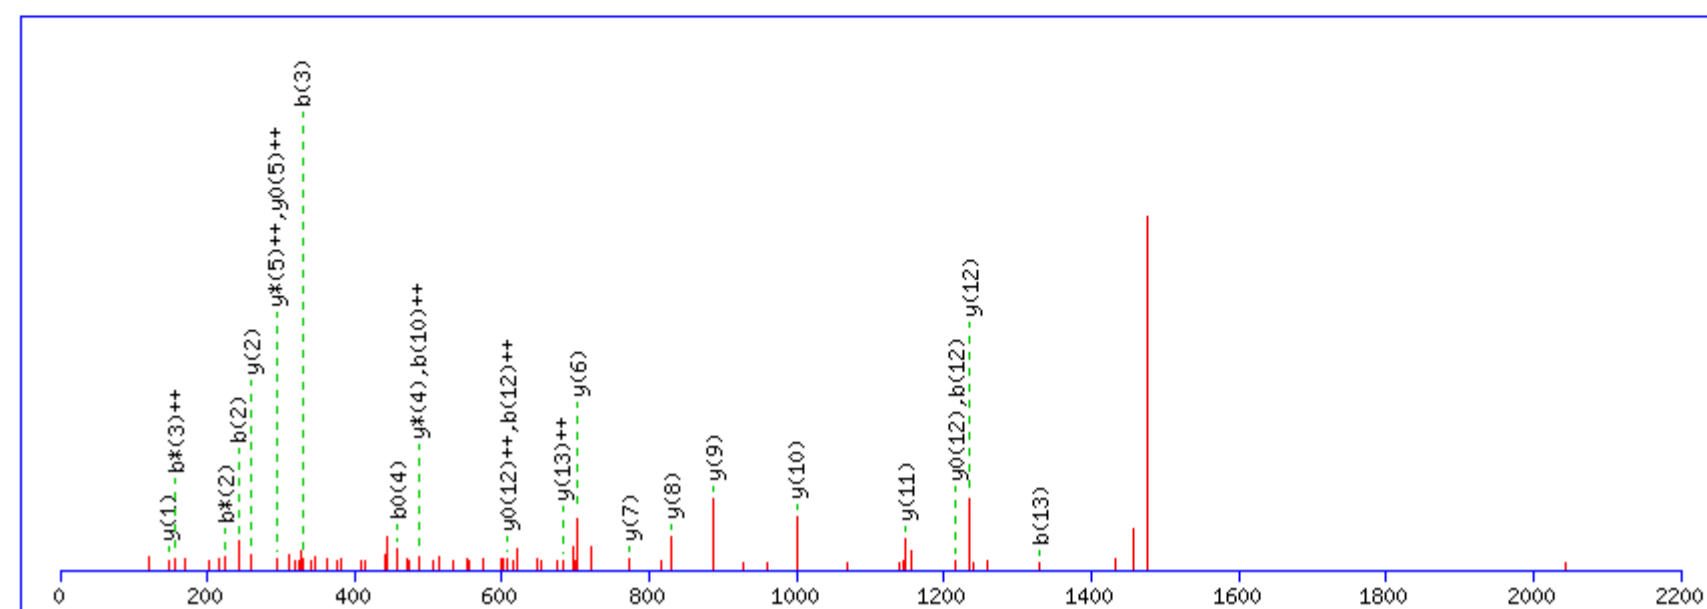

Monoisotopic mass of neutral peptide Mr(calcd): 1474.766754

Fixed modifications: Carbamidomethyl (C) (apply to specified residues or termini only)

Ions Score: 43 Expect: 0.00039

Matches : 24/146 fragment ions using 51 most intense peaks [\(help\)](#)

| #  | b                  | b <sup>++</sup>   | b <sup>+</sup>    | b <sup>+++</sup>  | b <sup>0</sup>    | b <sup>0++</sup> | Seq. | y                  | y <sup>++</sup>   | y <sup>+</sup>    | y <sup>+++</sup>  | y <sup>0</sup>     | y <sup>0++</sup>  | #  |
|----|--------------------|-------------------|-------------------|-------------------|-------------------|------------------|------|--------------------|-------------------|-------------------|-------------------|--------------------|-------------------|----|
| 1  | 114.091340         | 57.549308         |                   |                   |                   |                  | I    |                    |                   |                   |                   |                    |                   | 14 |
| 2  | <b>242.149918</b>  | 121.578597        | <b>225.123369</b> | 113.065323        |                   |                  | Q    | 1362.689973        | <b>681.848625</b> | 1345.663424       | 673.335350        | 1344.679408        | 672.843342        | 13 |
| 3  | <b>329.181946</b>  | 165.094611        | 312.155397        | <b>156.581336</b> | 311.171381        | 156.089328       | S    | <b>1234.631395</b> | 617.819336        | 1217.604846       | 609.306061        | <b>1216.620830</b> | <b>608.814053</b> | 12 |
| 4  | 476.250360         | 238.628818        | 459.223811        | 230.115543        | <b>458.239795</b> | 229.623535       | F    | <b>1147.599367</b> | 574.303322        | 1130.572818       | 565.790047        | 1129.588802        | 565.298039        | 11 |
| 5  | 589.334424         | 295.170850        | 572.307875        | 286.657576        | 571.323859        | 286.165568       | L    | <b>1000.530953</b> | 500.769115        | 983.504404        | 492.255840        | 982.520388         | 491.763832        | 10 |
| 6  | 646.355888         | 323.681582        | 629.329339        | 315.168308        | 628.345323        | 314.676300       | G    | <b>887.446889</b>  | 444.227083        | 870.420340        | 435.713808        | 869.436324         | 435.221800        | 9  |
| 7  | 703.377352         | 352.192314        | 686.350803        | 343.679040        | 685.366787        | 343.187032       | G    | <b>830.425425</b>  | 415.716351        | 813.398876        | 407.203076        | 812.414860         | 406.711068        | 8  |
| 8  | 774.414466         | 387.710871        | 757.387917        | 379.197597        | 756.403901        | 378.705589       | A    | <b>773.403961</b>  | 387.205619        | 756.377412        | 378.692344        | 755.393396         | 378.200336        | 7  |
| 9  | 871.467230         | 436.237253        | 854.440681        | 427.723979        | 853.456665        | 427.231971       | P    | <b>702.366847</b>  | 351.687062        | 685.340298        | 343.173787        | 684.356282         | 342.681779        | 6  |
| 10 | 972.514909         | <b>486.761093</b> | 955.488360        | 478.247818        | 954.504344        | 477.755810       | T    | 605.314083         | 303.160680        | 588.287534        | <b>294.647405</b> | 587.303518         | <b>294.155397</b> | 5  |
| 11 | 1101.557502        | 551.282389        | 1084.530953       | 542.769115        | 1083.546937       | 542.277107       | E    | 504.266404         | 252.636840        | <b>487.239855</b> | 244.123565        | 486.255839         | 243.631557        | 4  |
| 12 | <b>1216.584445</b> | <b>608.795861</b> | 1199.557896       | 600.282586        | 1198.573880       | 599.790578       | D    | 375.223811         | 188.115543        | 358.197262        | 179.602269        | 357.213246         | 179.110261        | 3  |
| 13 | <b>1329.668509</b> | 665.337893        | 1312.641960       | 656.824618        | 1311.657944       | 656.332610       | L    | <b>260.196868</b>  | 130.602072        | 243.170319        | 122.088797        |                    |                   | 2  |
| 14 |                    |                   |                   |                   |                   |                  | K    | <b>147.112804</b>  | 74.060040         | 130.086255        | 65.546765         |                    |                   | 1  |

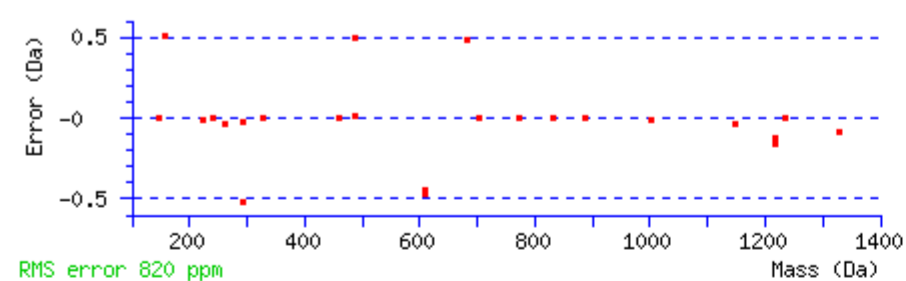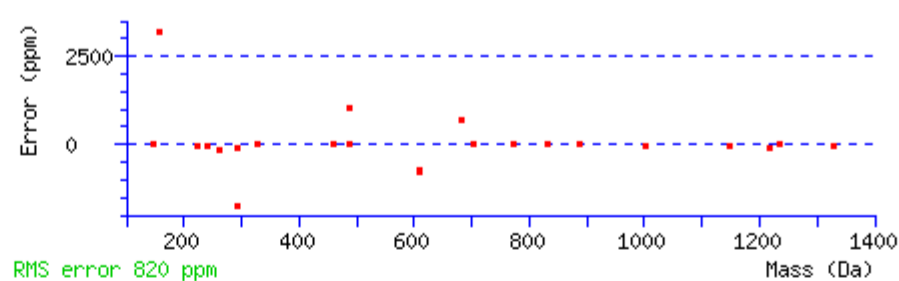

NCBI BLAST search of **IQSFLGGAPTEDLK**

(Parameters: blastp, nr protein database, expect=20000, no filter, PAM30)

Other BLAST [web gateways](#)

**All matches to this query**

| Score | Mr(calcd):  | Delta     | Sequence                       |
|-------|-------------|-----------|--------------------------------|
| 42.6  | 1474.766754 | -0.006406 | <a href="#">IQSFLGGAPTEDLK</a> |
| 5.9   | 1474.762680 | -0.002332 | <a href="#">NRLSSAEELSEIK</a>  |
| 1.6   | 1474.770096 | -0.009748 | <a href="#">SQIAAIVEMQELK</a>  |
| 0.4   | 1474.768097 | -0.007749 | <a href="#">ALVRQFGQDQWK</a>   |

# **MATRIX** SCIENCE Mascot Search Results

## Peptide View

MS/MS Fragmentation of **CAQGCICK**

Found in **MT1A\_HUMAN**, Metallothionein-1A OS=Homo sapiens GN=MT1A PE=1 SV=2

Match to Query 18708: 1037.444748 from(519.729650,2+) rtinseconds(872) index(882)

Title: Locus:1.1.1.1622.18

Data file 2011-11-12 - TFD - EP 6-5.mgf

Click mouse within plot area to zoom in by factor of two about that point

Or, Plot from  to  Da

Label all possible matches  Label matches used for scoring

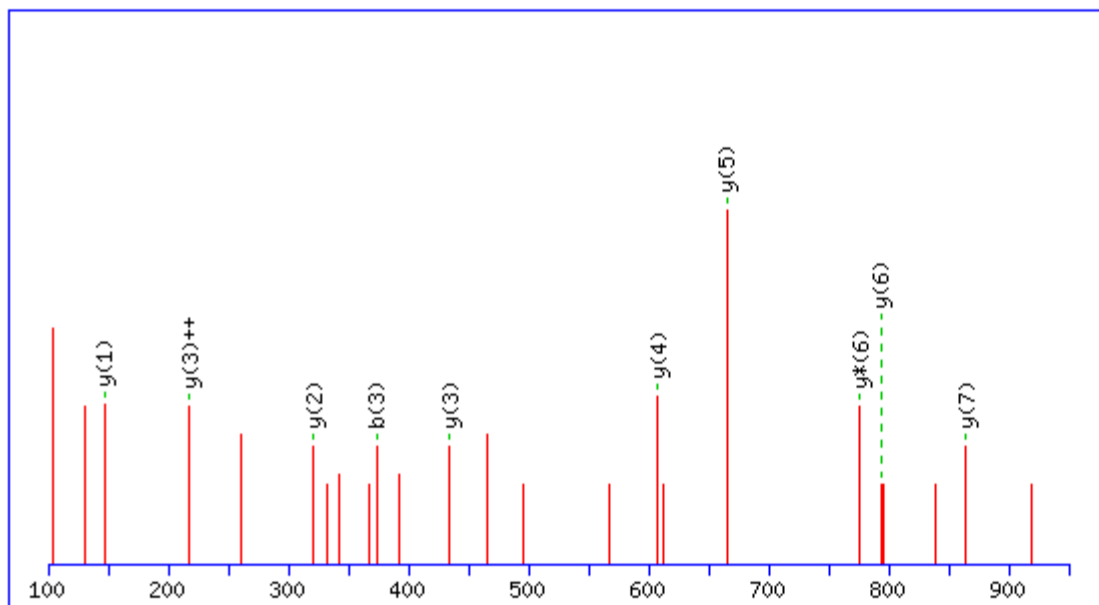

Monoisotopic mass of neutral peptide Mr(calc): 1037.445618

Fixed modifications: Propionamide (C) (apply to specified residues or termini only)

Ions Score: 49 Expect: 5.2e-005

Matches : 10/52 fragment ions using 16 most intense peaks ([help](#))

| # | b          | b <sup>++</sup> | b <sup>*</sup> | b <sup>*++</sup> | Seq. | y          | y <sup>++</sup> | y <sup>*</sup> | y <sup>*++</sup> | # |
|---|------------|-----------------|----------------|------------------|------|------------|-----------------|----------------|------------------|---|
| 1 | 175.053575 | 88.030425       |                |                  | C    |            |                 |                |                  | 8 |
| 2 | 246.090689 | 123.548982      |                |                  | A    | 864.406622 | 432.706949      | 847.380073     | 424.193675       | 7 |
| 3 | 374.149267 | 187.578272      | 357.122718     | 179.064997       | Q    | 793.369508 | 397.188392      | 776.342959     | 388.675118       | 6 |
| 4 | 431.170731 | 216.089003      | 414.144182     | 207.575729       | G    | 665.310930 | 333.159103      | 648.284381     | 324.645829       | 5 |
| 5 | 605.217030 | 303.112153      | 588.190481     | 294.598879       | C    | 608.289466 | 304.648371      | 591.262917     | 296.135097       | 4 |
| 6 | 718.301094 | 359.654185      | 701.274545     | 351.140911       | I    | 434.243167 | 217.625221      | 417.216618     | 209.111947       | 3 |
| 7 | 892.347393 | 446.677335      | 875.320844     | 438.164060       | C    | 321.159103 | 161.083189      | 304.132554     | 152.569915       | 2 |
| 8 |            |                 |                |                  | K    | 147.112804 | 74.060040       | 130.086255     | 65.546765        | 1 |

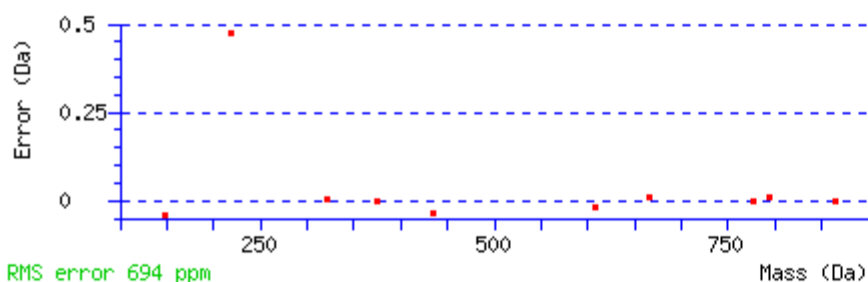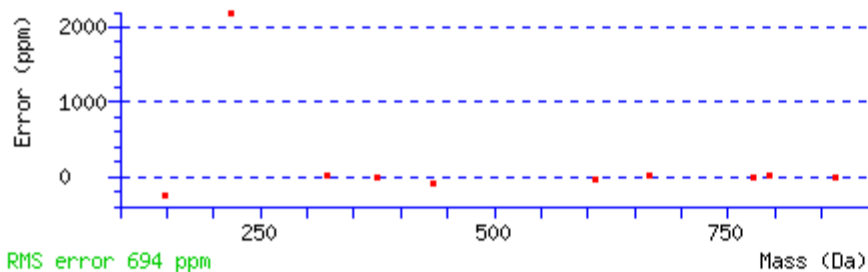

NCBI BLAST search of **CAQGCICK**

(Parameters: blastp, nr protein database, expect=20000, no filter, PAM30)

Other BLAST [web gateways](#)

## All matches to this query

| Score | Mr(calc):   | Delta     | Sequence                  |
|-------|-------------|-----------|---------------------------|
| 49.0  | 1037.445618 | -0.000870 | <a href="#">CAQGCICK</a>  |
| 1.6   | 1037.452164 | -0.007416 | <a href="#">NPMDMGTIK</a> |
| 1.0   | 1037.440918 | 0.003830  | <a href="#">MPLEMEPK</a>  |
| 0.6   | 1037.448792 | -0.004044 | <a href="#">TPENFPCK</a>  |

# MASCOT SEARCH RESULTS

## Peptide View

### MS/MS Fragmentation of TTLDSPLGK

Found in **MGMT\_HUMAN**, Methylated-DNA--protein-cysteine methyltransferase OS=Homo sapiens GN=MGMT PE=1 SV=1

Match to Query 10963: 930.503028 from(466.258790,2+) rtinseconds(1711) index(14260)

Title: Locus:1.1.1.1918.21

Data file 2011-11-10 - TFD - EP 3-6.mgf

Click mouse within plot area to zoom in by factor of two about that point

Or, Plot from  to  Da

Label all possible matches  Label matches used for scoring

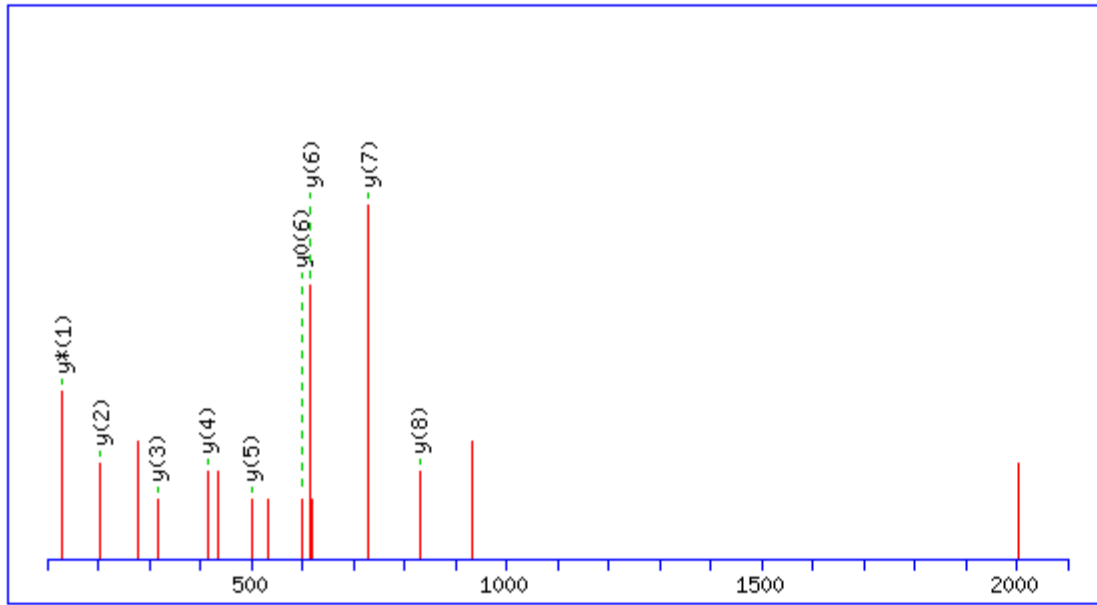

Monoisotopic mass of neutral peptide Mr(calc): 930.502213

Fixed modifications: Propionamide (C) (apply to specified residues or termini only)

Ions Score: 64 Expect: 1.1e-006

Matches : 9/72 fragment ions using 13 most intense peaks [\(help\)](#)

| # | b          | b <sup>++</sup> | b <sup>0</sup> | b <sup>0++</sup> | Seq. | y          | y <sup>++</sup> | y <sup>*</sup> | y <sup>*++</sup> | y <sup>0</sup> | y <sup>0++</sup> | # |
|---|------------|-----------------|----------------|------------------|------|------------|-----------------|----------------|------------------|----------------|------------------|---|
| 1 | 102.054955 | 51.531116       | 84.044390      | 42.525833        | T    |            |                 |                |                  |                |                  | 9 |
| 2 | 203.102634 | 102.054955      | 185.092069     | 93.049672        | T    | 830.461810 | 415.734543      | 813.435261     | 407.221269       | 812.451245     | 406.729261       | 8 |
| 3 | 316.186698 | 158.596987      | 298.176133     | 149.591704       | L    | 729.414131 | 365.210704      | 712.387582     | 356.697429       | 711.403566     | 356.205421       | 7 |
| 4 | 431.213641 | 216.110458      | 413.203076     | 207.105176       | D    | 616.330067 | 308.668672      | 599.303518     | 300.155397       | 598.319502     | 299.663389       | 6 |
| 5 | 518.245669 | 259.626473      | 500.235104     | 250.621190       | S    | 501.303124 | 251.155200      | 484.276575     | 242.641926       | 483.292559     | 242.149918       | 5 |
| 6 | 615.298433 | 308.152855      | 597.287868     | 299.147572       | P    | 414.271096 | 207.639186      | 397.244547     | 199.125912       |                |                  | 4 |
| 7 | 728.382497 | 364.694887      | 710.371932     | 355.689604       | L    | 317.218332 | 159.112804      | 300.191783     | 150.599530       |                |                  | 3 |
| 8 | 785.403961 | 393.205619      | 767.393396     | 384.200336       | G    | 204.134268 | 102.570772      | 187.107719     | 94.057498        |                |                  | 2 |
| 9 |            |                 |                |                  | K    | 147.112804 | 74.060040       | 130.086255     | 65.546765        |                |                  | 1 |

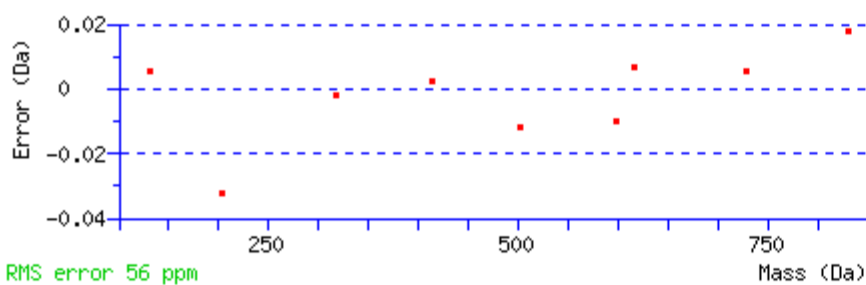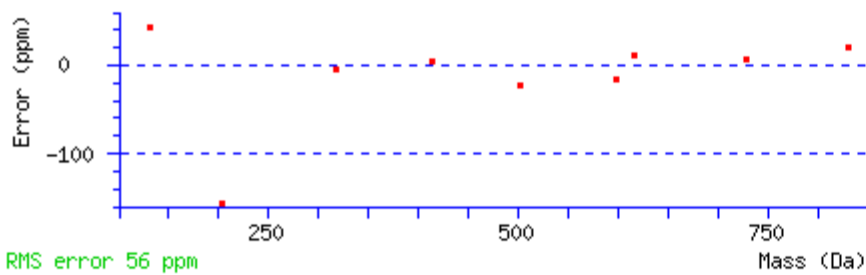

### NCBI BLAST search of TTLDSPLGK

(Parameters: blastp, nr protein database, expect=20000, no filter, PAM30)

Other BLAST [web gateways](#)

### All matches to this query

| Score | Mr(calc):  | Delta     | Sequence                  |
|-------|------------|-----------|---------------------------|
| 63.9  | 930.502213 | 0.000815  | <a href="#">TTLDSPLGK</a> |
| 0.2   | 930.503555 | -0.000527 | <a href="#">TPTWVRR</a>   |
| 0.0   | 930.502182 | 0.000846  | <a href="#">TSELPKEK</a>  |

# MASCOT SEARCH RESULTS

## Peptide View

MS/MS Fragmentation of **TLADAEGDVFR**

Found in **MMSA\_HUMAN**, Methylmalonate-semialdehyde dehydrogenase [acylating], mitochondrial OS=Homo sapiens GN=ALDH6A1 PE=1 SV=2

Match to Query 511962: 1192.574968 from(597.294760,2+) rtinseconds(2438) index(923988)

Title: Locus:1.1.1.1332.19

Data file C:\Program Files (x86)\Matrix Science\Mascot Daemon\mgf3 TFD - Epitel - R2\mascot\_daemon\_merge.mgf

Click mouse within plot area to zoom in by factor of two about that point

Or, Plot from  to  Da

Label all possible matches  Label matches used for scoring

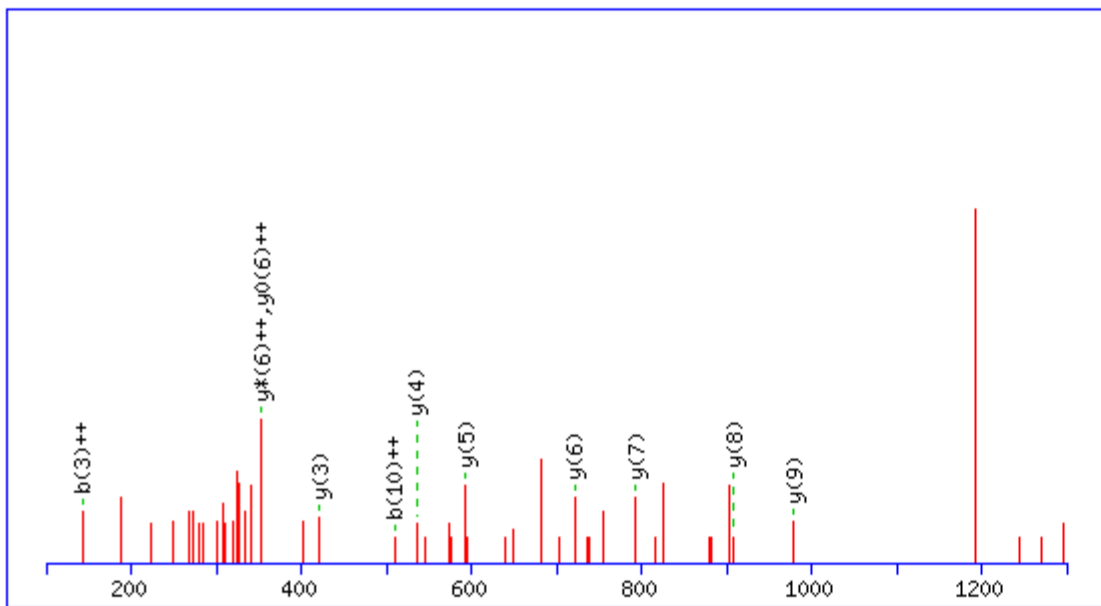

Monoisotopic mass of neutral peptide  $M_r(\text{calc})$ : 1192.572418

Fixed modifications: Carbamidomethyl (C) (apply to specified residues or termini only)

Ions Score: 48 Expect: 0.00011

Matches : 11/94 fragment ions using 17 most intense peaks ([help](#))

| #  | b           | b <sup>++</sup>   | b <sup>0</sup> | b <sup>0++</sup> | Seq. | y                 | y <sup>++</sup> | y <sup>*</sup> | y <sup>*++</sup>  | y <sup>0</sup> | y <sup>0++</sup>  | #  |
|----|-------------|-------------------|----------------|------------------|------|-------------------|-----------------|----------------|-------------------|----------------|-------------------|----|
| 1  | 102.054955  | 51.531116         | 84.044390      | 42.525833        | T    |                   |                 |                |                   |                |                   | 11 |
| 2  | 215.139019  | 108.073147        | 197.128454     | 99.067865        | L    | 1092.532015       | 546.769646      | 1075.505466    | 538.256371        | 1074.521450    | 537.764363        | 10 |
| 3  | 286.176133  | <b>143.591704</b> | 268.165568     | 134.586422       | A    | <b>979.447951</b> | 490.227614      | 962.421402     | 481.714339        | 961.437386     | 481.222331        | 9  |
| 4  | 401.203076  | 201.105176        | 383.192511     | 192.099894       | D    | <b>908.410837</b> | 454.709057      | 891.384288     | 446.195782        | 890.400272     | 445.703774        | 8  |
| 5  | 472.240190  | 236.623733        | 454.229625     | 227.618451       | A    | <b>793.383894</b> | 397.195585      | 776.357345     | 388.682311        | 775.373329     | 388.190303        | 7  |
| 6  | 601.282783  | 301.145030        | 583.272218     | 292.139747       | E    | <b>722.346780</b> | 361.677028      | 705.320231     | <b>353.163753</b> | 704.336215     | <b>352.671745</b> | 6  |
| 7  | 658.304247  | 329.655762        | 640.293682     | 320.650479       | G    | <b>593.304187</b> | 297.155732      | 576.277638     | 288.642457        | 575.293622     | 288.150449        | 5  |
| 8  | 773.331190  | 387.169233        | 755.320625     | 378.163951       | D    | <b>536.282723</b> | 268.644999      | 519.256174     | 260.131725        | 518.272158     | 259.639717        | 4  |
| 9  | 872.399604  | 436.703440        | 854.389039     | 427.698158       | V    | <b>421.255780</b> | 211.131528      | 404.229231     | 202.618253        |                |                   | 3  |
| 10 | 1019.468018 | <b>510.237647</b> | 1001.457453    | 501.232365       | F    | 322.187366        | 161.597321      | 305.160817     | 153.084046        |                |                   | 2  |
| 11 |             |                   |                |                  | R    | 175.118952        | 88.063114       | 158.092403     | 79.549839         |                |                   | 1  |

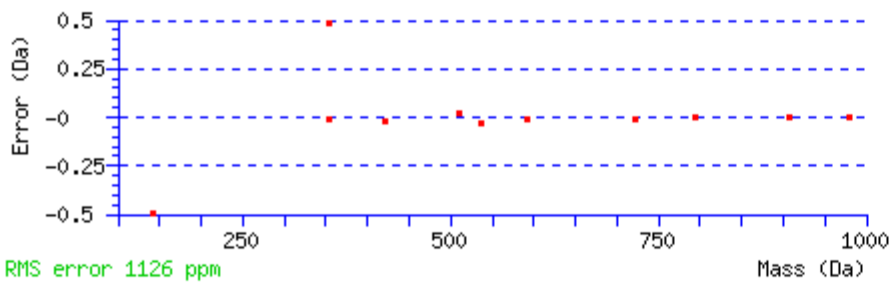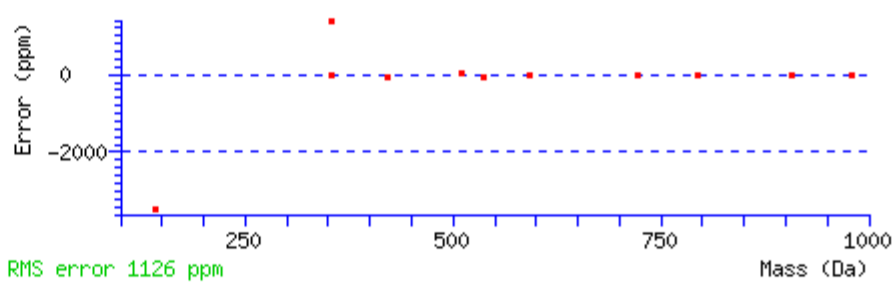

NCBI BLAST search of **TLADAEGDVFR**

(Parameters: blastp, nr protein database, expect=20000, no filter, PAM30)

Other BLAST [web gateways](#)

All matches to this query

| Score | $M_r(\text{calc})$ : | Delta    | Sequence                    |
|-------|----------------------|----------|-----------------------------|
| 48.4  | 1192.572418          | 0.002550 | <a href="#">TLADAEGDVFR</a> |

Mascot: <http://www.matrixscience.com/>



# MASCOT Search Results

## Peptide View

MS/MS Fragmentation of **ILFDGIPLEK**

Found in **MUTA\_HUMAN**, Methylmalonyl-CoA mutase, mitochondrial OS=Homo sapiens GN=MUT PE=1 SV=4

Match to Query 27751: 1143.652028 from(572.833290,2+) rtinseconds(3174) index(44112)

Title: Locus:1.1.1.2630.17

Data file 2011-11-14 - TFD - EP 8-2.mgf

Click mouse within plot area to zoom in by factor of two about that point

Or, Plot from  to  Da

Label all possible matches  Label matches used for scoring

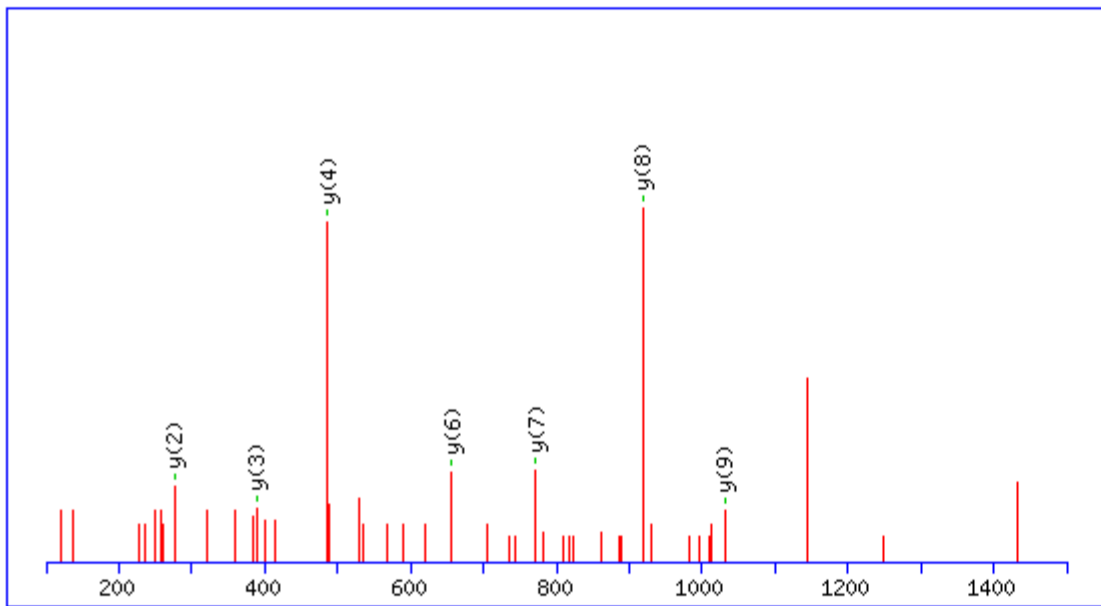

Monoisotopic mass of neutral peptide Mr(calc): 1143.653946

Fixed modifications: Propionamide (C) (apply to specified residues or termini only)

Ions Score: 60 Expect: 8.2e-006

Matches : 7/82 fragment ions using 10 most intense peaks [\(help\)](#)

| #  | b          | b <sup>++</sup> | b <sup>0</sup> | b <sup>0++</sup> | Seq. | y                  | y <sup>++</sup> | y <sup>*</sup> | y <sup>*++</sup> | y <sup>0</sup> | y <sup>0++</sup> | #  |
|----|------------|-----------------|----------------|------------------|------|--------------------|-----------------|----------------|------------------|----------------|------------------|----|
| 1  | 114.091340 | 57.549308       |                |                  | I    |                    |                 |                |                  |                |                  | 10 |
| 2  | 227.175404 | 114.091340      |                |                  | L    | <b>1031.577174</b> | 516.292225      | 1014.550625    | 507.778951       | 1013.566609    | 507.286943       | 9  |
| 3  | 374.243818 | 187.625547      |                |                  | F    | <b>918.493110</b>  | 459.750193      | 901.466561     | 451.236919       | 900.482545     | 450.744911       | 8  |
| 4  | 489.270761 | 245.139018      | 471.260196     | 236.133736       | D    | <b>771.424696</b>  | 386.215986      | 754.398147     | 377.702712       | 753.414131     | 377.210704       | 7  |
| 5  | 546.292225 | 273.649751      | 528.281660     | 264.644468       | G    | <b>656.397753</b>  | 328.702515      | 639.371204     | 320.189240       | 638.387188     | 319.697232       | 6  |
| 6  | 659.376289 | 330.191783      | 641.365724     | 321.186500       | I    | 599.376289         | 300.191783      | 582.349740     | 291.678508       | 581.365724     | 291.186500       | 5  |
| 7  | 756.429053 | 378.718165      | 738.418488     | 369.712882       | P    | <b>486.292225</b>  | 243.649751      | 469.265676     | 235.136476       | 468.281660     | 234.644468       | 4  |
| 8  | 869.513117 | 435.260197      | 851.502552     | 426.254914       | L    | <b>389.239461</b>  | 195.123369      | 372.212912     | 186.610094       | 371.228896     | 186.118086       | 3  |
| 9  | 998.555710 | 499.781493      | 980.545145     | 490.776211       | E    | <b>276.155397</b>  | 138.581336      | 259.128848     | 130.068062       | 258.144832     | 129.576054       | 2  |
| 10 |            |                 |                |                  | K    | 147.112804         | 74.060040       | 130.086255     | 65.546765        |                |                  | 1  |

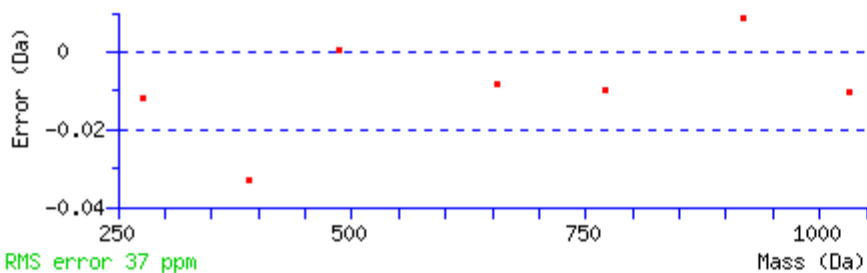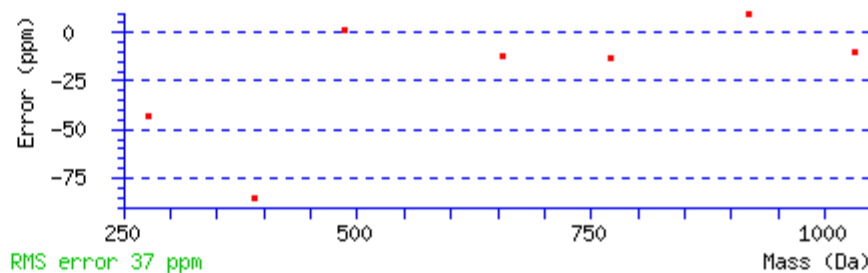

NCBI BLAST search of [ILFDGIPLEK](#)

(Parameters: blastp, nr protein database, expect=20000, no filter, PAM30)

Other BLAST [web gateways](#)

All matches to this query

| Score | Mr(calc):   | Delta     | Sequence                    |
|-------|-------------|-----------|-----------------------------|
| 59.5  | 1143.653946 | -0.001918 | <a href="#">ILFDGIPLEK</a>  |
| 9.1   | 1143.643387 | 0.008641  | <a href="#">LLGCSPALKR</a>  |
| 8.9   | 1143.661133 | -0.009105 | <a href="#">IIIAKENSTR</a>  |
| 6.8   | 1143.647430 | 0.004598  | <a href="#">IPMFIVHKK</a>   |
| 2.8   | 1143.647232 | 0.004796  | <a href="#">RRPSTASLTR</a>  |
| 2.0   | 1143.643372 | 0.008656  | <a href="#">LLKENQMLR</a>   |
| 1.5   | 1143.661133 | -0.009105 | <a href="#">LLTKSENAR</a>   |
| 1.3   | 1143.643402 | 0.008626  | <a href="#">LICGGKTLPR</a>  |
| 1.0   | 1143.649933 | 0.002095  | <a href="#">LPTTVLNATAK</a> |

Mascot: <http://www.matrixscience.com/>

# MASCOT SCIENCE Mascot Search Results

## Peptide View

MS/MS Fragmentation of **ILLWDTR**

Found in **MEP50\_HUMAN**, Methylosome protein 50 OS=Homo sapiens GN=WDR77 PE=1 SV=1

Match to Query 9318: 915.520188 from(458.767370,2+) rtinseconds(2877) index(39544)

Title: Locus:1.1.1.2391.4

Data file 2011-11-12 - TFD - EP 6-4.mgf

Click mouse within plot area to zoom in by factor of two about that point

Or, Plot from  to  Da

Label all possible matches  Label matches used for scoring

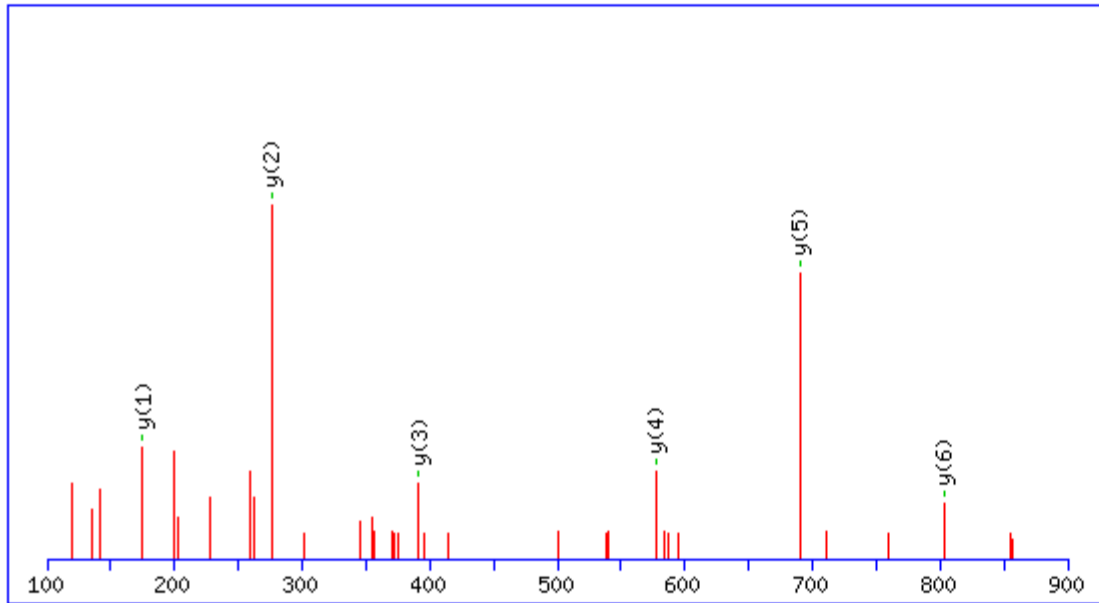

Monoisotopic mass of neutral peptide Mr(calc): 915.517792

Fixed modifications: Propionamide (C) (apply to specified residues or termini only)

Ions Score: 54 Expect: 4.5e-005

Matches : 6/50 fragment ions using 8 most intense peaks [\(help\)](#)

| # | b          | b <sup>++</sup> | b <sup>0</sup> | b <sup>0++</sup> | Seq. | y          | y <sup>++</sup> | y <sup>*</sup> | y <sup>*++</sup> | y <sup>0</sup> | y <sup>0++</sup> | # |
|---|------------|-----------------|----------------|------------------|------|------------|-----------------|----------------|------------------|----------------|------------------|---|
| 1 | 114.091340 | 57.549308       |                |                  | I    |            |                 |                |                  |                |                  | 7 |
| 2 | 227.175404 | 114.091340      |                |                  | L    | 803.441015 | 402.224146      | 786.414466     | 393.710871       | 785.430450     | 393.218863       | 6 |
| 3 | 340.259468 | 170.633372      |                |                  | L    | 690.356951 | 345.682114      | 673.330402     | 337.168839       | 672.346386     | 336.676831       | 5 |
| 4 | 526.338781 | 263.673029      |                |                  | W    | 577.272887 | 289.140082      | 560.246338     | 280.626807       | 559.262322     | 280.134799       | 4 |
| 5 | 641.365724 | 321.186500      | 623.355159     | 312.181218       | D    | 391.193574 | 196.100425      | 374.167025     | 187.587150       | 373.183009     | 187.095142       | 3 |
| 6 | 742.413403 | 371.710340      | 724.402838     | 362.705057       | T    | 276.166631 | 138.586953      | 259.140082     | 130.073679       | 258.156066     | 129.581671       | 2 |
| 7 |            |                 |                |                  | R    | 175.118952 | 88.063114       | 158.092403     | 79.549839        |                |                  | 1 |

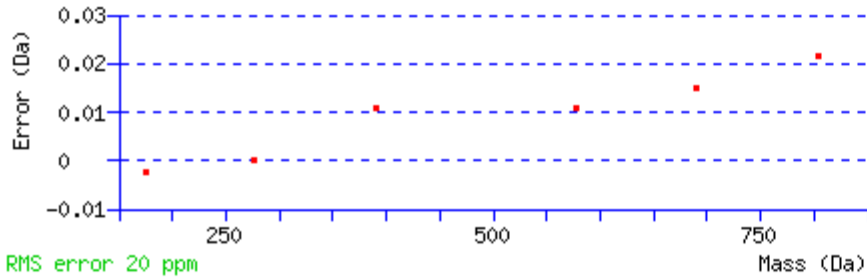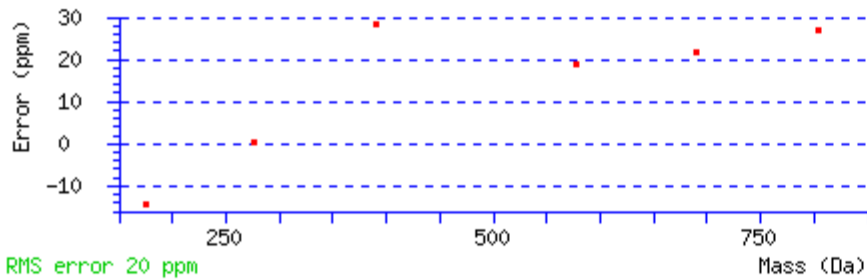

NCBI BLAST search of [ILLWDTR](#)

(Parameters: blastp, nr protein database, expect=20000, no filter, PAM30)

Other BLAST [web gateways](#)

## All matches to this query

| Score | Mr(calc):  | Delta     | Sequence                 |
|-------|------------|-----------|--------------------------|
| 54.3  | 915.517792 | 0.002396  | <a href="#">ILLWDTR</a>  |
| 21.8  | 915.521149 | -0.000961 | <a href="#">LLLLDCR</a>  |
| 13.1  | 915.513748 | 0.006440  | <a href="#">IRELETR</a>  |
| 10.6  | 915.513748 | 0.006440  | <a href="#">LEKAAQTR</a> |
| 9.9   | 915.529007 | -0.008819 | <a href="#">ILSKYHR</a>  |
| 6.4   | 915.527679 | -0.007491 | <a href="#">LLSIDLDK</a> |
| 6.3   | 915.529022 | -0.008834 | <a href="#">LFRLDPR</a>  |
| 6.3   | 915.529022 | -0.008834 | <a href="#">LRFEPVR</a>  |
| 5.5   | 915.524979 | -0.004791 | <a href="#">IRANSISR</a> |
| 0.7   | 915.513763 | 0.006425  | <a href="#">SLAQQLTR</a> |

# MASCOT SCIENCE Mascot Search Results

## Peptide View

MS/MS Fragmentation of **GLGTGTLIAESR**

Found in **ICLN\_HUMAN**, Methylosome subunit pICln OS=Homo sapiens GN=CLNS1A PE=1 SV=1

Match to Query 38362: 1336.693788 from(669.354170,2+) rtinseconds(2462) index(31728)

Title: Locus:1.1.1.2234.38

Data file 2011-11-12 - TFD - EP 6-4.mgf

Click mouse within plot area to zoom in by factor of two about that point

Or, Plot from  to  Da

Label all possible matches  Label matches used for scoring

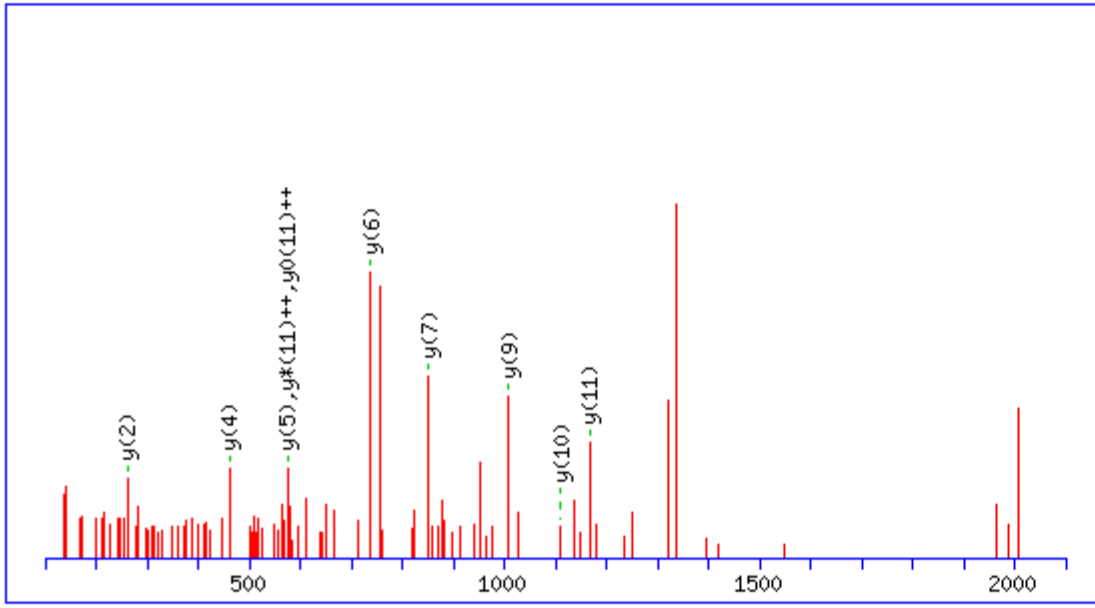

Monoisotopic mass of neutral peptide Mr(calc): 1336.698669

Fixed modifications: Propionamide (C) (apply to specified residues or termini only)

Ions Score: 67 Expect: 2.2e-006

Matches : 10/112 fragment ions using 12 most intense peaks [\(help\)](#)

| #  | b           | b <sup>++</sup> | b <sup>0</sup> | b <sup>0++</sup> | Seq.     | y                  | y <sup>++</sup> | y <sup>*</sup> | y <sup>*++</sup>  | y <sup>0</sup> | y <sup>0++</sup>  | #  |
|----|-------------|-----------------|----------------|------------------|----------|--------------------|-----------------|----------------|-------------------|----------------|-------------------|----|
| 1  | 58.028740   | 29.518008       |                |                  | <b>G</b> |                    |                 |                |                   |                |                   | 13 |
| 2  | 171.112804  | 86.060040       |                |                  | <b>L</b> | 1280.684494        | 640.845885      | 1263.657945    | 632.332611        | 1262.673929    | 631.840603        | 12 |
| 3  | 228.134268  | 114.570772      |                |                  | <b>G</b> | <b>1167.600430</b> | 584.303853      | 1150.573881    | <b>575.790579</b> | 1149.589865    | <b>575.298570</b> | 11 |
| 4  | 329.181947  | 165.094611      | 311.171382     | 156.089329       | <b>T</b> | <b>1110.578966</b> | 555.793121      | 1093.552417    | 547.279847        | 1092.568401    | 546.787839        | 10 |
| 5  | 386.203411  | 193.605343      | 368.192846     | 184.600061       | <b>G</b> | <b>1009.531287</b> | 505.269282      | 992.504738     | 496.756007        | 991.520722     | 496.263999        | 9  |
| 6  | 487.251090  | 244.129183      | 469.240525     | 235.123900       | <b>T</b> | 952.509823         | 476.758550      | 935.483274     | 468.245275        | 934.499258     | 467.753267        | 8  |
| 7  | 600.335154  | 300.671215      | 582.324589     | 291.665933       | <b>L</b> | <b>851.462144</b>  | 426.234710      | 834.435595     | 417.721436        | 833.451579     | 417.229428        | 7  |
| 8  | 763.398483  | 382.202879      | 745.387918     | 373.197597       | <b>Y</b> | <b>738.378080</b>  | 369.692678      | 721.351531     | 361.179404        | 720.367515     | 360.687396        | 6  |
| 9  | 876.482547  | 438.744912      | 858.471982     | 429.739629       | <b>I</b> | <b>575.314751</b>  | 288.161014      | 558.288202     | 279.647739        | 557.304186     | 279.155731        | 5  |
| 10 | 947.519661  | 474.263468      | 929.509096     | 465.258186       | <b>A</b> | <b>462.230687</b>  | 231.618981      | 445.204138     | 223.105707        | 444.220122     | 222.613699        | 4  |
| 11 | 1076.562254 | 538.784765      | 1058.551689    | 529.779482       | <b>E</b> | 391.193573         | 196.100425      | 374.167024     | 187.587150        | 373.183008     | 187.095142        | 3  |
| 12 | 1163.594282 | 582.300779      | 1145.583717    | 573.295497       | <b>S</b> | <b>262.150980</b>  | 131.579128      | 245.124431     | 123.065854        | 244.140415     | 122.573846        | 2  |
| 13 |             |                 |                |                  | <b>R</b> | 175.118952         | 88.063114       | 158.092403     | 79.549839         |                |                   | 1  |

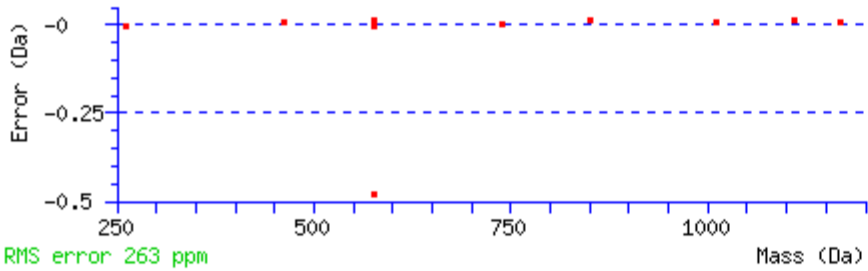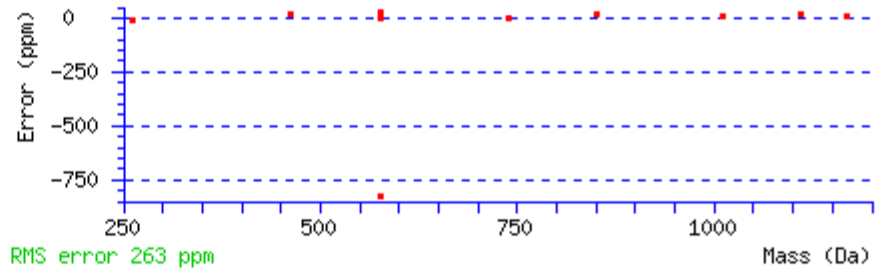

NCBI BLAST search of [GLGTGTLIAESR](#)

(Parameters: blastp, nr protein database, expect=20000, no filter, PAM30)

Other BLAST [web gateways](#)

## All matches to this query

| Score | Mr(calc):   | Delta     | Sequence                     |
|-------|-------------|-----------|------------------------------|
| 67.3  | 1336.698669 | -0.004881 | <a href="#">GLGTGTLIAESR</a> |
| 7.0   | 1336.702042 | -0.008254 | <a href="#">LGSQTLTKCSK</a>  |
| 5.1   | 1336.706039 | -0.012251 | <a href="#">CALKLLYDSPK</a>  |

Mascot: <http://www.matrixscience.com/>

# **MATRIX** SCIENCE Mascot Search Results

## Peptide View

MS/MS Fragmentation of **STATAFYR**

Found in **MGST1\_HUMAN**, Microsomal glutathione S-transferase 1 OS=Homo sapiens GN=MGST1 PE=1 SV=1

Match to Query 147542: 915.446808 from(458.730680,2+) rtinseconds(1551) index(668661)

Title: Locus:1.1.1.1257.11

Data file C:\Program Files (x86)\Matrix Science\Mascot Daemon\mgf3 TFD - Epitel - R2\mascot\_daemon\_merge.mgf

Click mouse within plot area to zoom in by factor of two about that point

Or, Plot from  to  Da

Label all possible matches  Label matches used for scoring

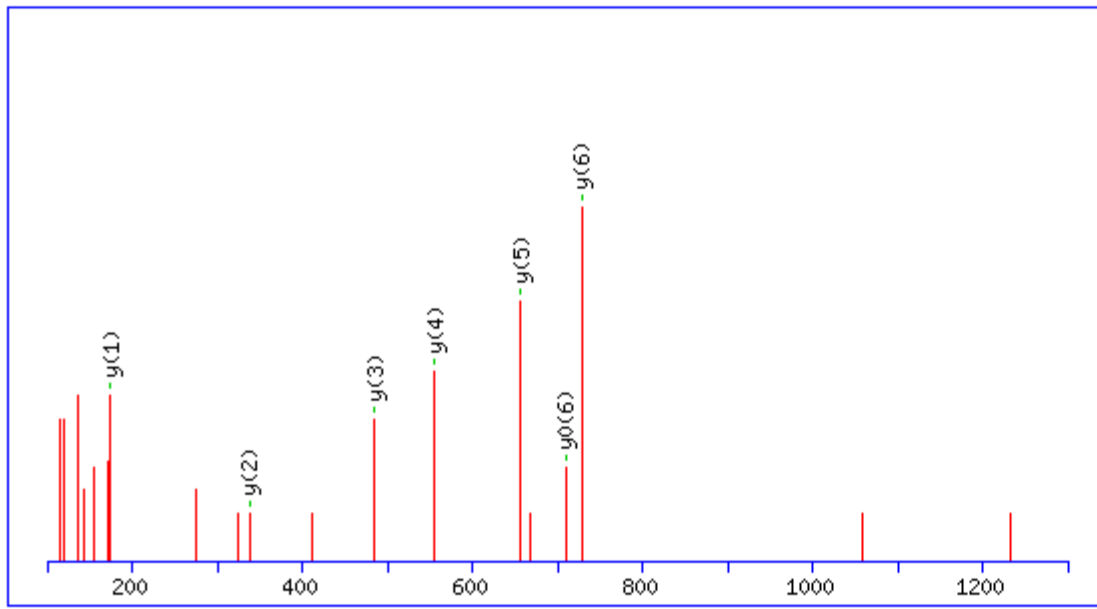

Monoisotopic mass of neutral peptide Mr(calc): 915.445023

Fixed modifications: Carbamidomethyl (C) (apply to specified residues or termini only)

Ions Score: 44 Expect: 0.00045

Matches : 7/62 fragment ions using 13 most intense peaks ([help](#))

| # | b          | b <sup>++</sup> | b <sup>0</sup> | b <sup>0++</sup> | Seq. | y                 | y <sup>++</sup> | y <sup>*</sup> | y <sup>*++</sup> | y <sup>0</sup>    | y <sup>0++</sup> | # |
|---|------------|-----------------|----------------|------------------|------|-------------------|-----------------|----------------|------------------|-------------------|------------------|---|
| 1 | 88.039304  | 44.523290       | 70.028739      | 35.518008        | S    |                   |                 |                |                  |                   |                  | 8 |
| 2 | 189.086983 | 95.047129       | 171.076418     | 86.041847        | T    | 829.420281        | 415.213779      | 812.393732     | 406.700504       | 811.409716        | 406.208496       | 7 |
| 3 | 260.124097 | 130.565686      | 242.113532     | 121.560404       | A    | <b>728.372602</b> | 364.689939      | 711.346053     | 356.176665       | <b>710.362037</b> | 355.684657       | 6 |
| 4 | 361.171776 | 181.089526      | 343.161211     | 172.084243       | T    | <b>657.335488</b> | 329.171382      | 640.308939     | 320.658108       | 639.324923        | 320.166100       | 5 |
| 5 | 432.208890 | 216.608083      | 414.198325     | 207.602800       | A    | <b>556.287809</b> | 278.647543      | 539.261260     | 270.134268       |                   |                  | 4 |
| 6 | 579.277304 | 290.142290      | 561.266739     | 281.137007       | F    | <b>485.250695</b> | 243.128985      | 468.224146     | 234.615711       |                   |                  | 3 |
| 7 | 742.340633 | 371.673955      | 724.330068     | 362.668672       | Y    | <b>338.182281</b> | 169.594778      | 321.155732     | 161.081504       |                   |                  | 2 |
| 8 |            |                 |                |                  | R    | <b>175.118952</b> | 88.063114       | 158.092403     | 79.549839        |                   |                  | 1 |

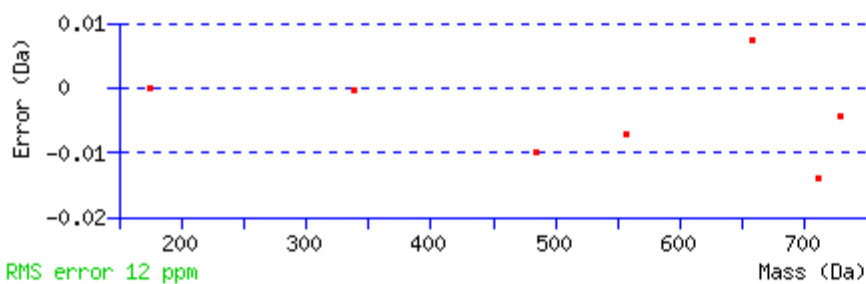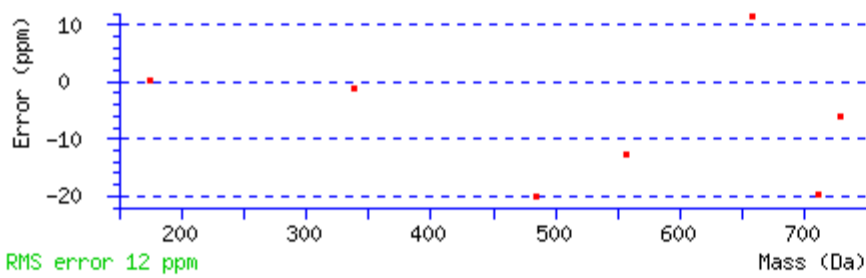

NCBI BLAST search of [STATAFYR](#)

(Parameters: blastp, nr protein database, expect=20000, no filter, PAM30)

Other BLAST [web gateways](#)

## All matches to this query

| Score | Mr(calc):  | Delta     | Sequence                  |
|-------|------------|-----------|---------------------------|
| 43.6  | 915.445023 | 0.001785  | <a href="#">STATAFYR</a>  |
| 7.8   | 915.441010 | 0.005798  | <a href="#">DGSKPAGPR</a> |
| 5.8   | 915.452255 | -0.005447 | <a href="#">TSGRGPPGR</a> |

**MATRIX SCIENCE Mascot Search Results**

**Peptide View**

MS/MS Fragmentation of **VTPPAVTGSPEFER**

Found in **MGST2\_HUMAN**, Microsomal glutathione S-transferase 2 OS=Homo sapiens GN=MGST2 PE=1 SV=1

Match to Query 39107: 1485.748328 from(743.881440,2+) rtinseconds(2163) index(20819)

Title: Locus:1.1.1.2179.49

Data file 2011-11-14 - TFD - EP 8-7.mgf

Click mouse within plot area to zoom in by factor of two about that point

Or, Plot from  to  Da

Label all possible matches  Label matches used for scoring

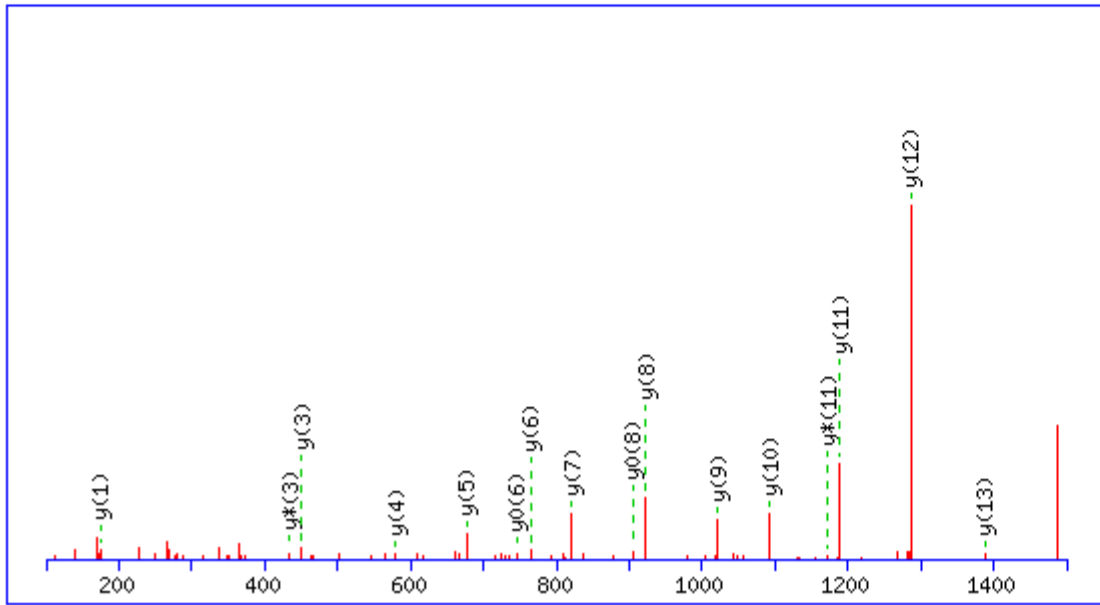

Monoisotopic mass of neutral peptide Mr(calc): 1485.746368

Fixed modifications: Propionamide (C) (apply to specified residues or termini only)

Ions Score: 106 Expect: 1.7e-010

Matches : 16/126 fragment ions using 25 most intense peaks [\(help\)](#)

| #  | b           | b <sup>++</sup> | b <sup>0</sup> | b <sup>0++</sup> | Seq. | y           | y <sup>++</sup> | y <sup>*</sup> | y <sup>*++</sup> | y <sup>0</sup> | y <sup>0++</sup> | #  |
|----|-------------|-----------------|----------------|------------------|------|-------------|-----------------|----------------|------------------|----------------|------------------|----|
| 1  | 100.075690  | 50.541483       |                |                  | V    |             |                 |                |                  |                |                  | 14 |
| 2  | 201.123369  | 101.065322      | 183.112804     | 92.060040        | T    | 1387.685222 | 694.346249      | 1370.658673    | 685.832975       | 1369.674657    | 685.340967       | 13 |
| 3  | 298.176133  | 149.591704      | 280.165568     | 140.586422       | P    | 1286.637543 | 643.822410      | 1269.610994    | 635.309135       | 1268.626978    | 634.817127       | 12 |
| 4  | 395.228897  | 198.118087      | 377.218332     | 189.112804       | P    | 1189.584779 | 595.296028      | 1172.558230    | 586.782753       | 1171.574214    | 586.290745       | 11 |
| 5  | 466.266011  | 233.636643      | 448.255446     | 224.631361       | A    | 1092.532015 | 546.769646      | 1075.505466    | 538.256371       | 1074.521450    | 537.764363       | 10 |
| 6  | 565.334425  | 283.170851      | 547.323860     | 274.165568       | V    | 1021.494901 | 511.251089      | 1004.468352    | 502.737814       | 1003.484336    | 502.245806       | 9  |
| 7  | 666.382104  | 333.694690      | 648.371539     | 324.689408       | T    | 922.426487  | 461.716882      | 905.399938     | 453.203607       | 904.415922     | 452.711599       | 8  |
| 8  | 723.403568  | 362.205422      | 705.393003     | 353.200140       | G    | 821.378808  | 411.193042      | 804.352259     | 402.679768       | 803.368243     | 402.187760       | 7  |
| 9  | 810.435596  | 405.721436      | 792.425031     | 396.716154       | S    | 764.357344  | 382.682310      | 747.330795     | 374.169036       | 746.346779     | 373.677028       | 6  |
| 10 | 907.488360  | 454.247818      | 889.477795     | 445.242536       | P    | 677.325316  | 339.166296      | 660.298767     | 330.653022       | 659.314751     | 330.161014       | 5  |
| 11 | 1036.530953 | 518.769115      | 1018.520388    | 509.763832       | E    | 580.272552  | 290.639914      | 563.246003     | 282.126640       | 562.261987     | 281.634632       | 4  |
| 12 | 1183.599367 | 592.303322      | 1165.588802    | 583.298039       | F    | 451.229959  | 226.118617      | 434.203410     | 217.605343       | 433.219394     | 217.113335       | 3  |
| 13 | 1312.641960 | 656.824618      | 1294.631395    | 647.819336       | E    | 304.161545  | 152.584410      | 287.134996     | 144.071136       | 286.150980     | 143.579128       | 2  |
| 14 |             |                 |                |                  | R    | 175.118952  | 88.063114       | 158.092403     | 79.549839        |                |                  | 1  |

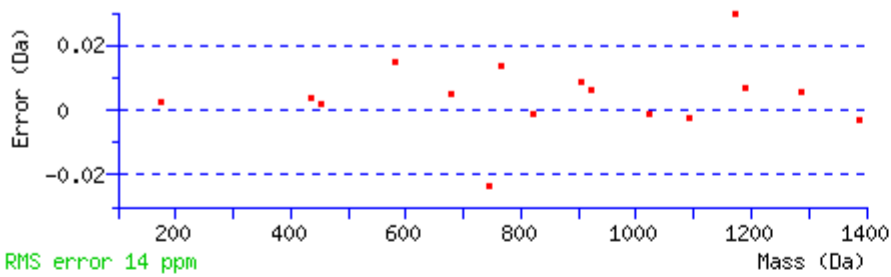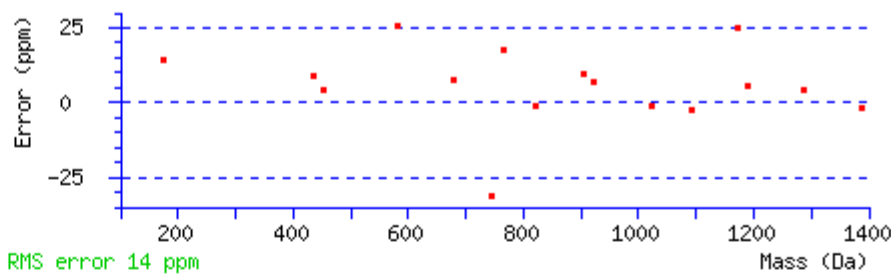

NCBI BLAST search of [VTPPAVTGSPEFER](#)

(Parameters: blastp, nr protein database, expect=20000, no filter, PAM30)

Other BLAST [web gateways](#)

**All matches to this query**

| Score | Mr(calc):   | Delta     | Sequence                       |
|-------|-------------|-----------|--------------------------------|
| 106.2 | 1485.746368 | 0.001960  | <a href="#">VTPPAVTGSPEFER</a> |
| 1.9   | 1485.742340 | 0.005988  | <a href="#">LSPSPPTTEDPRVR</a> |
| 1.5   | 1485.736465 | 0.011863  | <a href="#">SLAGPPPHFSSFSR</a> |
| 0.8   | 1485.757584 | -0.009256 | <a href="#">VIKLDHGSGEPIR</a>  |

**Peptide View**

MS/MS Fragmentation of **LLIQVGHEPMPPTLGTVLGR**  
 Found in **MTCH1\_HUMAN**, Mitochondrial carrier homolog 1 OS=Homo sapiens GN=MTCH1 PE=1 SV=1

Match to Query 69829: 2257.223382 from(753.415070,3+) rtinseconds(3046) index(42728)  
 Title: Locus:1.1.1.2454.38  
 Data file 2011-11-12 - TFD - EP 6-4.mgf

Click mouse within plot area to zoom in by factor of two about that point

Or, Plot from  to  Da   
 Label all possible matches  Label matches used for scoring

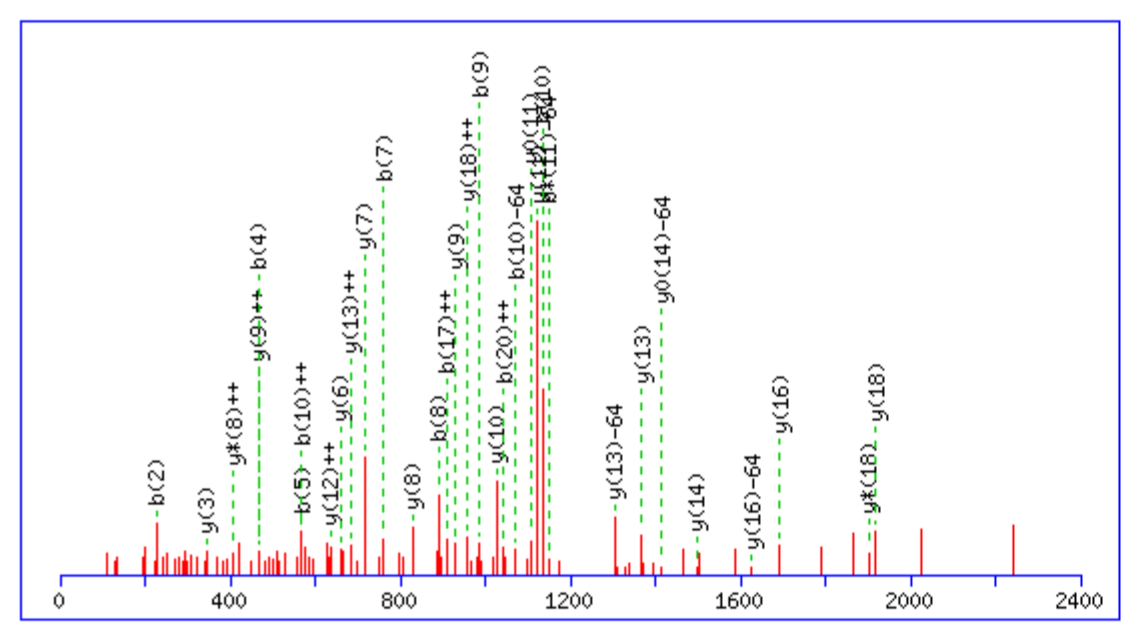

Monoisotopic mass of neutral peptide Mr(calc): 2257.225281  
 Fixed modifications: Propionamide (C) (apply to specified residues or termini only)  
 Variable modifications:  
 M10 : Oxidation (M), with neutral losses 0.000000 (shown in table), 63.998285  
 Ions Score: 55 Expect: 1.7e-005  
 Matches : 33/330 fragment ions using 63 most intense peaks [\(help\)](#)

| #  | b                  | b <sup>++</sup>    | b <sup>*</sup> | b <sup>*++</sup> | b <sup>0</sup> | b <sup>0++</sup> | Seq. | y                  | y <sup>++</sup>   | y <sup>*</sup>     | y <sup>*++</sup>  | y <sup>0</sup>     | y <sup>0++</sup> | #  |
|----|--------------------|--------------------|----------------|------------------|----------------|------------------|------|--------------------|-------------------|--------------------|-------------------|--------------------|------------------|----|
| 1  | 114.091340         | 57.549308          |                |                  |                |                  | L    |                    |                   |                    |                   |                    |                  | 21 |
| 2  | <b>227.175404</b>  | 114.091340         |                |                  |                |                  | L    | 2145.148488        | 1073.077882       | 2128.121939        | 1064.564607       | 2127.137923        | 1064.072599      | 20 |
| 3  | 340.259468         | 170.633372         |                |                  |                |                  | I    | 2032.064424        | 1016.535850       | 2015.037875        | 1008.022575       | 2014.053859        | 1007.530567      | 19 |
| 4  | <b>468.318046</b>  | 234.662661         | 451.291497     | 226.149386       |                |                  | Q    | <b>1918.980360</b> | <b>959.993818</b> | <b>1901.953811</b> | 951.480543        | 1900.969795        | 950.988535       | 18 |
| 5  | <b>567.386460</b>  | 284.196868         | 550.359911     | 275.683594       |                |                  | V    | 1790.921782        | 895.964529        | 1773.895233        | 887.451254        | 1772.911217        | 886.959246       | 17 |
| 6  | 624.407924         | 312.707600         | 607.381375     | 304.194326       |                |                  | G    | <b>1691.853368</b> | 846.430322        | 1674.826819        | 837.917047        | 1673.842803        | 837.425039       | 16 |
| 7  | <b>761.466836</b>  | 381.237056         | 744.440287     | 372.723782       |                |                  | H    | 1634.831904        | 817.919590        | 1617.805355        | 809.406315        | 1616.821339        | 808.914307       | 15 |
| 8  | <b>890.509429</b>  | 445.758353         | 873.482880     | 437.245078       | 872.498864     | 436.753070       | E    | <b>1497.772992</b> | 749.390134        | 1480.746443        | 740.876859        | 1479.762427        | 740.384851       | 14 |
| 9  | <b>987.562193</b>  | 494.284735         | 970.535644     | 485.771460       | 969.551628     | 485.279452       | P    | <b>1368.730399</b> | <b>684.868837</b> | 1351.703850        | 676.355563        | 1350.719834        | 675.863555       | 13 |
| 10 | <b>1134.597593</b> | <b>567.802435</b>  | 1117.571044    | 559.289160       | 1116.587028    | 558.797152       | M    | 1271.677635        | <b>636.342455</b> | 1254.651086        | 627.829181        | 1253.667070        | 627.337173       | 12 |
| 11 | 1231.650357        | 616.328817         | 1214.623808    | 607.815542       | 1213.639792    | 607.323534       | P    | <b>1124.642235</b> | 562.824755        | 1107.615686        | 554.311481        | <b>1106.631670</b> | 553.819473       | 11 |
| 12 | 1328.703121        | 664.855199         | 1311.676572    | 656.341924       | 1310.692556    | 655.849916       | P    | <b>1027.589471</b> | 514.298373        | 1010.562922        | 505.785099        | 1009.578906        | 505.293091       | 10 |
| 13 | 1429.750800        | 715.379038         | 1412.724251    | 706.865764       | 1411.740235    | 706.373756       | T    | <b>930.536707</b>  | <b>465.771991</b> | 913.510158         | 457.258717        | 912.526142         | 456.766709       | 9  |
| 14 | 1542.834864        | 771.921070         | 1525.808315    | 763.407796       | 1524.824299    | 762.915787       | L    | <b>829.489028</b>  | 415.248152        | 812.462479         | <b>406.734877</b> | 811.478463         | 406.242869       | 8  |
| 15 | 1599.856328        | 800.431802         | 1582.829779    | 791.918527       | 1581.845763    | 791.426519       | G    | <b>716.404964</b>  | 358.706120        | 699.378415         | 350.192845        | 698.394399         | 349.700837       | 7  |
| 16 | 1700.904007        | 850.955641         | 1683.877458    | 842.442367       | 1682.893442    | 841.950359       | T    | <b>659.383500</b>  | 330.195388        | 642.356951         | 321.682113        | 641.372935         | 321.190105       | 6  |
| 17 | 1814.946934        | <b>907.977105</b>  | 1797.920385    | 899.463830       | 1796.936369    | 898.971822       | N    | 558.335821         | 279.671548        | 541.309272         | 271.158274        |                    |                  | 5  |
| 18 | 1914.015348        | 957.511312         | 1896.988799    | 948.998038       | 1896.004783    | 948.506029       | V    | 444.292894         | 222.650085        | 427.266345         | 214.136810        |                    |                  | 4  |
| 19 | 2027.099412        | 1014.053344        | 2010.072863    | 1005.540070      | 2009.088847    | 1005.048061      | L    | <b>345.224480</b>  | 173.115878        | 328.197931         | 164.602603        |                    |                  | 3  |
| 20 | 2084.120876        | <b>1042.564076</b> | 2067.094327    | 1034.050801      | 2066.110311    | 1033.558793      | G    | 232.140416         | 116.573846        | 215.113867         | 108.060571        |                    |                  | 2  |
| 21 |                    |                    |                |                  |                |                  | R    | 175.118952         | 88.063114         | 158.092403         | 79.549839         |                    |                  | 1  |

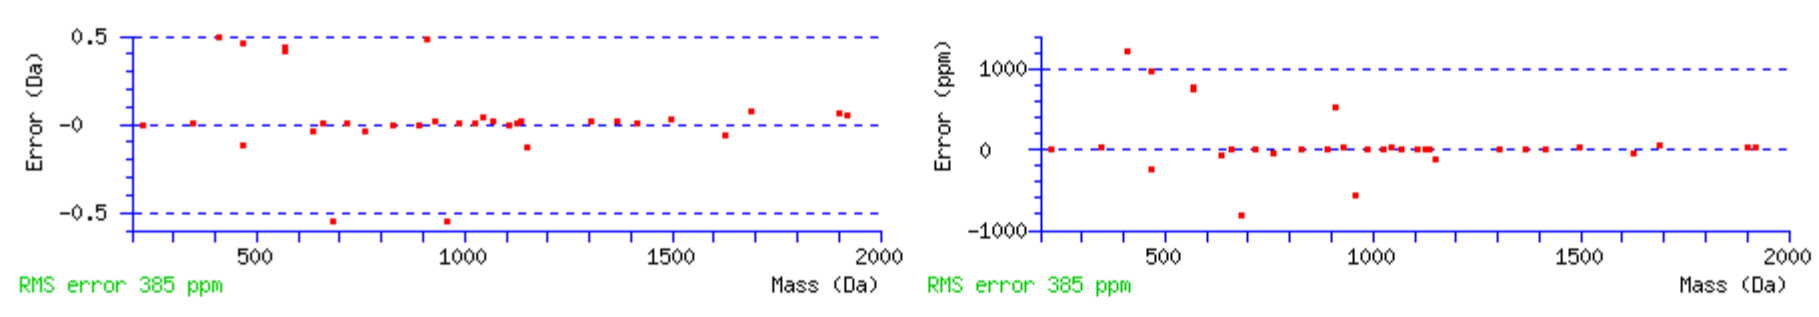

NCBI BLAST search of **LLIQVGHEPMPPTLGTVLGR**  
 (Parameters: blastp, nr protein database, expect=20000, no filter, PAM30)  
 Other BLAST [web gateways](#)

**All matches to this query**

| Score | Mr(calc):   | Delta     | Sequence                             |
|-------|-------------|-----------|--------------------------------------|
| 54.6  | 2257.225281 | -0.001899 | <a href="#">LLIQVGHEPMPPTLGTVLGR</a> |
| 46.8  | 2257.225281 | -0.001899 | <a href="#">LLIQVGHEPMPPTLGTVLGR</a> |
| 34.6  | 2257.225281 | -0.001899 | <a href="#">LLIQVGHEPMPPTLGTVLGR</a> |
| 28.6  | 2257.225281 | -0.001899 | <a href="#">LLIQVGHEPMPPTLGTVLGR</a> |

# **MATRIX** SCIENCE Mascot Search Results

## Peptide View

MS/MS Fragmentation of **VTDLLGGLFSK**

Found in **TIM44\_HUMAN**, Mitochondrial import inner membrane translocase subunit TIM44 OS=Homo sapiens GN=TIMM44 PE=1 SV=2

Match to Query 25512: 1148.646468 from(575.330510,2+) rtinseconds(3584) index(52249)

Title: Locus:1.1.1.2790.9

Data file 2011-11-13 - TFD - EP 7-4.mgf

Click mouse within plot area to zoom in by factor of two about that point

Or, Plot from  to  Da

Label all possible matches  Label matches used for scoring

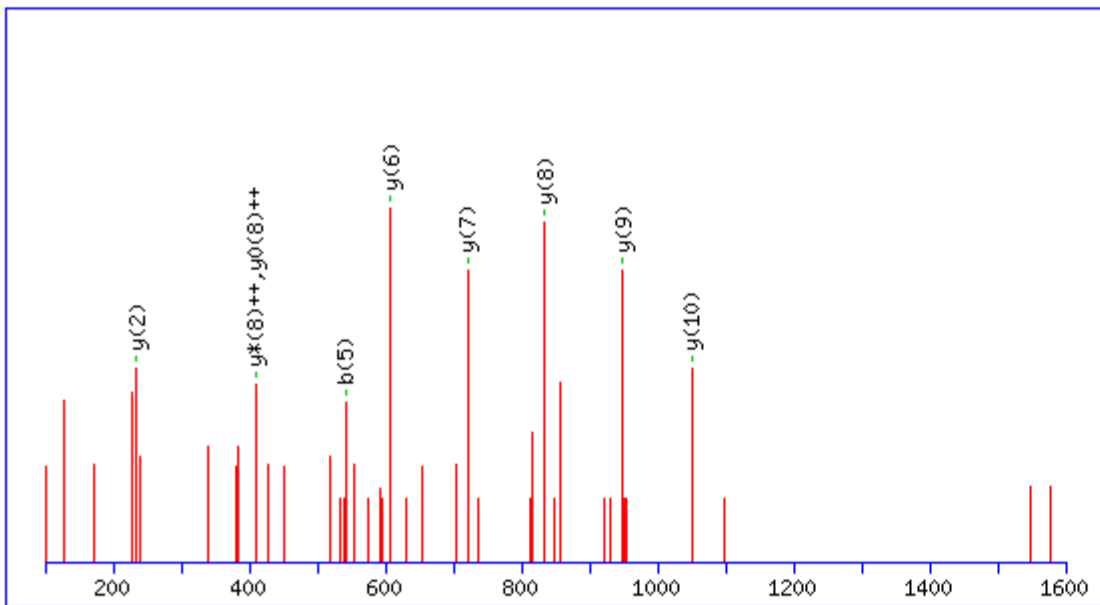

Monoisotopic mass of neutral peptide Mr(calc): 1148.644135

Fixed modifications: Propionamide (C) (apply to specified residues or termini only)

Ions Score: 47 Expect: 0.00013

Matches : 9/96 fragment ions using 10 most intense peaks [\(help\)](#)

| #  | b           | b <sup>++</sup> | b <sup>0</sup> | b <sup>0++</sup> | Seq. | y           | y <sup>++</sup> | y <sup>*</sup> | y <sup>*++</sup> | y <sup>0</sup> | y <sup>0++</sup> | #  |
|----|-------------|-----------------|----------------|------------------|------|-------------|-----------------|----------------|------------------|----------------|------------------|----|
| 1  | 100.075690  | 50.541483       |                |                  | V    |             |                 |                |                  |                |                  | 11 |
| 2  | 201.123369  | 101.065322      | 183.112804     | 92.060040        | T    | 1050.582988 | 525.795132      | 1033.556439    | 517.281858       | 1032.572423    | 516.789850       | 10 |
| 3  | 316.150312  | 158.578794      | 298.139747     | 149.573512       | D    | 949.535309  | 475.271293      | 932.508760     | 466.758018       | 931.524744     | 466.266010       | 9  |
| 4  | 429.234376  | 215.120826      | 411.223811     | 206.115544       | L    | 834.508366  | 417.757821      | 817.481817     | 409.244547       | 816.497801     | 408.752539       | 8  |
| 5  | 542.318440  | 271.662858      | 524.307875     | 262.657576       | L    | 721.424302  | 361.215789      | 704.397753     | 352.702515       | 703.413737     | 352.210507       | 7  |
| 6  | 599.339904  | 300.173590      | 581.329339     | 291.168308       | G    | 608.340238  | 304.673757      | 591.313689     | 296.160483       | 590.329673     | 295.668475       | 6  |
| 7  | 656.361368  | 328.684322      | 638.350803     | 319.679040       | G    | 551.318774  | 276.163025      | 534.292225     | 267.649751       | 533.308209     | 267.157743       | 5  |
| 8  | 769.445432  | 385.226354      | 751.434867     | 376.221072       | L    | 494.297310  | 247.652293      | 477.270761     | 239.139019       | 476.286745     | 238.647011       | 4  |
| 9  | 916.513846  | 458.760561      | 898.503281     | 449.755279       | F    | 381.213246  | 191.110261      | 364.186697     | 182.596987       | 363.202681     | 182.104979       | 3  |
| 10 | 1003.545874 | 502.276575      | 985.535309     | 493.271293       | S    | 234.144832  | 117.576054      | 217.118283     | 109.062780       | 216.134267     | 108.570772       | 2  |
| 11 |             |                 |                |                  | K    | 147.112804  | 74.060040       | 130.086255     | 65.546766        |                |                  | 1  |

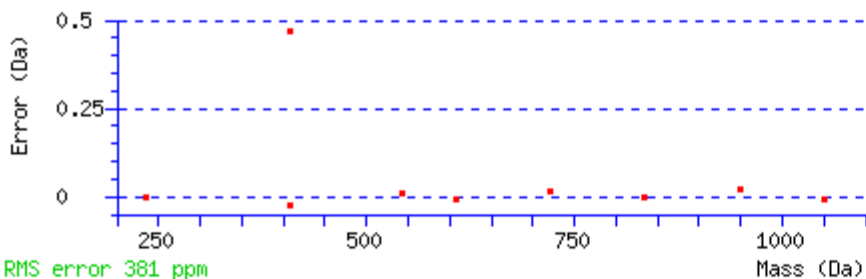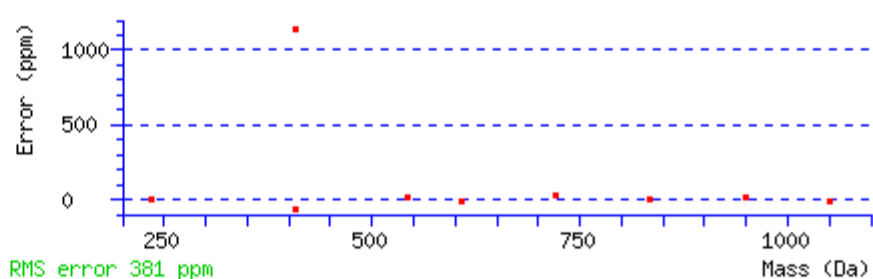

NCBI BLAST search of **VTDLLGGLFSK**

(Parameters: blastp, nr protein database, expect=20000, no filter, PAM30)

Other BLAST [web gateways](#)

## All matches to this query

| Score | Mr(calc):   | Delta    | Sequence                    |
|-------|-------------|----------|-----------------------------|
| 47.0  | 1148.644135 | 0.002333 | <a href="#">VTDLLGGLFSK</a> |

Mascot: <http://www.matrixscience.com/>

**Peptide View**

MS/MS Fragmentation of **FIDTSQFILNR**

Found in **TIM8A\_HUMAN**, Mitochondrial import inner membrane translocase subunit Tim8 A OS=Homo sapiens GN=TIMM8A PE=1 SV=1

Match to Query 35026: 1352.699908 from(677.357230,2+) rtinseconds(3083) index(35483)  
 Title: Locus:1.1.1.2509.43  
 Data file 2011-11-12 - TFD - EP 6-7.mgf

Click mouse within plot area to zoom in by factor of two about that point  
 Or, Plot from  to  Da   
 Label all possible matches  Label matches used for scoring

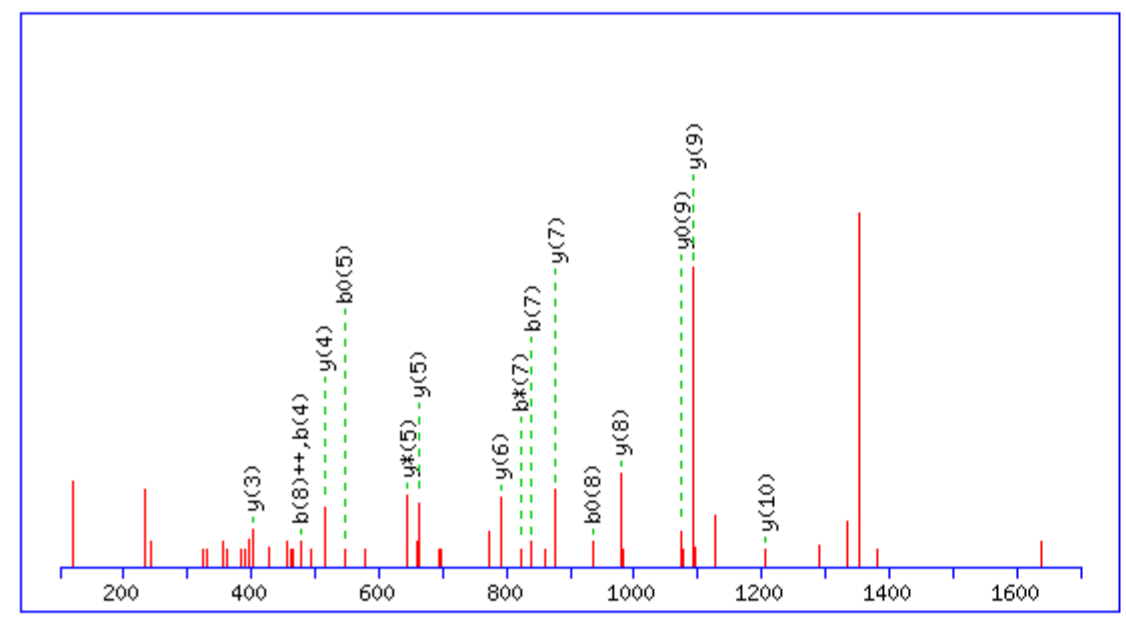

Monoisotopic mass of neutral peptide Mr(calc): 1352.708847  
 Fixed modifications: Propionamide (C) (apply to specified residues or termini only)  
 Ions Score: 53 Expect: 1.5e-005  
 Matches : 16/94 fragment ions using 29 most intense peaks [\(help\)](#)

| #  | b           | b <sup>++</sup> | b <sup>+</sup> | b <sup>*++</sup> | b <sup>0</sup> | b <sup>0++</sup> | Seq. | y           | y <sup>++</sup> | y <sup>*</sup> | y <sup>*++</sup> | y <sup>0</sup> | y <sup>0++</sup> | #  |
|----|-------------|-----------------|----------------|------------------|----------------|------------------|------|-------------|-----------------|----------------|------------------|----------------|------------------|----|
| 1  | 148.075690  | 74.541483       |                |                  |                |                  | F    |             |                 |                |                  |                |                  | 11 |
| 2  | 261.159754  | 131.083515      |                |                  |                |                  | I    | 1206.647713 | 603.827494      | 1189.621164    | 595.314220       | 1188.637148    | 594.822212       | 10 |
| 3  | 376.186697  | 188.596986      |                |                  | 358.176132     | 179.591704       | D    | 1093.563649 | 547.285462      | 1076.537100    | 538.772188       | 1075.553084    | 538.280180       | 9  |
| 4  | 477.234376  | 239.120826      |                |                  | 459.223811     | 230.115544       | T    | 978.536706  | 489.771991      | 961.510157     | 481.258716       | 960.526141     | 480.766708       | 8  |
| 5  | 564.266404  | 282.636840      |                |                  | 546.255839     | 273.631558       | S    | 877.489027  | 439.248151      | 860.462478     | 430.734877       | 859.478462     | 430.242869       | 7  |
| 6  | 692.324982  | 346.666129      | 675.298433     | 338.152855       | 674.314417     | 337.660847       | Q    | 790.456999  | 395.732137      | 773.430450     | 387.218863       |                |                  | 6  |
| 7  | 839.393396  | 420.200336      | 822.366847     | 411.687062       | 821.382831     | 411.195054       | F    | 662.398421  | 331.702848      | 645.371872     | 323.189574       |                |                  | 5  |
| 8  | 952.477460  | 476.742368      | 935.450911     | 468.229094       | 934.466895     | 467.737086       | I    | 515.330007  | 258.168641      | 498.303458     | 249.655367       |                |                  | 4  |
| 9  | 1065.561524 | 533.284400      | 1048.534975    | 524.771126       | 1047.550959    | 524.279117       | L    | 402.245943  | 201.626609      | 385.219394     | 193.113335       |                |                  | 3  |
| 10 | 1179.604451 | 590.305863      | 1162.577902    | 581.792589       | 1161.593886    | 581.300581       | N    | 289.161879  | 145.084577      | 272.135330     | 136.571303       |                |                  | 2  |
| 11 |             |                 |                |                  |                |                  | R    | 175.118952  | 88.063114       | 158.092403     | 79.549839        |                |                  | 1  |

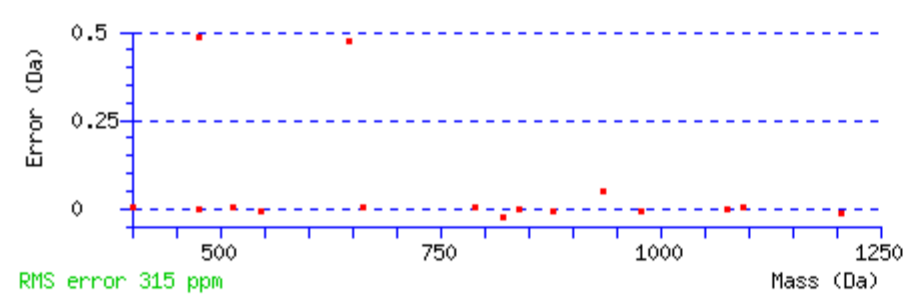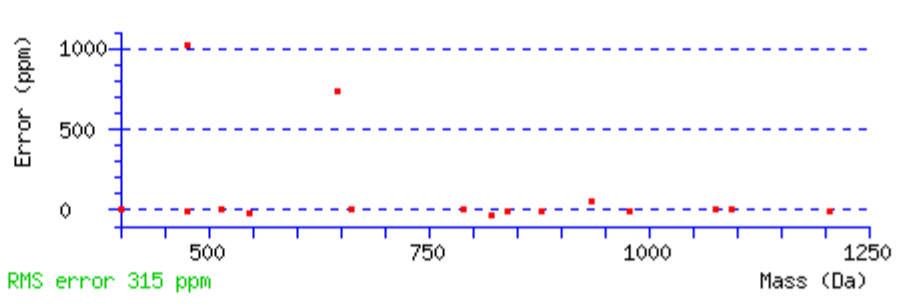

NCBI BLAST search of **FIDTSQFILNR**  
 (Parameters: blastp, nr protein database, expect=20000, no filter, PAM30)  
 Other BLAST [web gateways](#)

**All matches to this query**

| Score | Mr(calc):   | Delta     | Sequence                     |
|-------|-------------|-----------|------------------------------|
| 53.1  | 1352.708847 | -0.008939 | <a href="#">FIDTSQFILNR</a>  |
| 1.6   | 1352.708847 | -0.008939 | <a href="#">FPSPHPSPAKLK</a> |
| 0.5   | 1352.708862 | -0.008954 | <a href="#">FPDFKSAGVTLR</a> |



**Peptide View**

MS/MS Fragmentation of **LQMEQQQLQQR**

Found in **TOM22\_HUMAN**, Mitochondrial import receptor subunit TOM22 homolog OS=Homo sapiens GN=TOMM22 PE=1 SV=3

Match to Query 43499: 1572.771042 from(525.264290,3+) rtinseconds(1153) index(3856)

Title: Locus:1.1.1.1706.34

Data file 2011-11-10 - TFD - EP 3-6.mgf

Click mouse within plot area to zoom in by factor of two about that point

Or, Plot from  to  Da

Label all possible matches  Label matches used for scoring

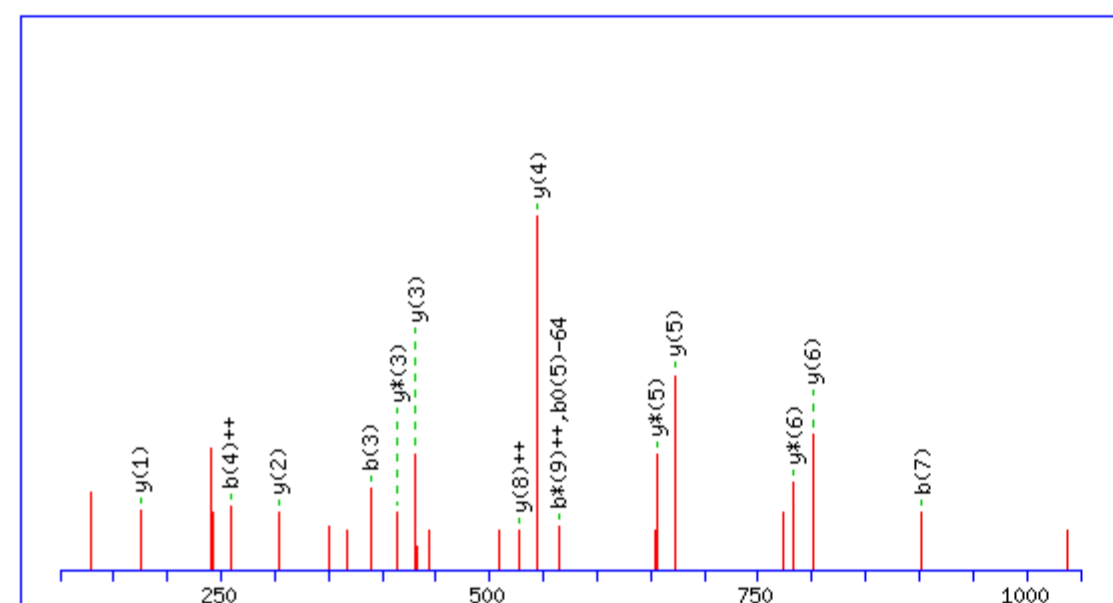

Monoisotopic mass of neutral peptide Mr(calc): 1572.767822

Fixed modifications: Propionamide (C) (apply to specified residues or termini only)

Variable modifications:

M3 : Oxidation (M), with neutral losses 0.000000 (shown in table), 63.998285

Ions Score: 35 Expect: 0.0047

Matches : 15/172 fragment ions using 21 most intense peaks [\(help\)](#)

| #  | b                 | b <sup>++</sup>   | b <sup>*</sup> | b <sup>*++</sup>  | b <sup>0</sup> | b <sup>0++</sup> | Seq. | y                 | y <sup>++</sup>   | y <sup>*</sup>    | y <sup>*++</sup> | y <sup>0</sup> | y <sup>0++</sup> | #  |
|----|-------------------|-------------------|----------------|-------------------|----------------|------------------|------|-------------------|-------------------|-------------------|------------------|----------------|------------------|----|
| 1  | 114.091340        | 57.549308         |                |                   |                |                  | L    |                   |                   |                   |                  |                |                  | 12 |
| 2  | 242.149918        | 121.578597        | 225.123369     | 113.065323        |                |                  | Q    | 1460.691055       | 730.849166        | 1443.664506       | 722.335891       | 1442.680490    | 721.843883       | 11 |
| 3  | <b>389.185318</b> | 195.096297        | 372.158769     | 186.583023        |                |                  | M    | 1332.632477       | 666.819877        | 1315.605928       | 658.306602       | 1314.621912    | 657.814594       | 10 |
| 4  | 518.227911        | <b>259.617594</b> | 501.201362     | 251.104319        | 500.217346     | 250.612311       | E    | 1185.597077       | 593.302177        | 1168.570528       | 584.788902       | 1167.586512    | 584.296894       | 9  |
| 5  | 646.286489        | 323.646883        | 629.259940     | 315.133608        | 628.275924     | 314.641600       | Q    | 1056.554484       | <b>528.780880</b> | 1039.527935       | 520.267606       |                |                  | 8  |
| 6  | 774.345067        | 387.676172        | 757.318518     | 379.162897        | 756.334502     | 378.670889       | Q    | 928.495906        | 464.751591        | 911.469357        | 456.238317       |                |                  | 7  |
| 7  | <b>902.403645</b> | 451.705461        | 885.377096     | 443.192186        | 884.393080     | 442.700178       | Q    | <b>800.437328</b> | 400.722302        | <b>783.410779</b> | 392.209028       |                |                  | 6  |
| 8  | 1030.462223       | 515.734750        | 1013.435674    | 507.221475        | 1012.451658    | 506.729467       | Q    | <b>672.378750</b> | 336.693013        | <b>655.352201</b> | 328.179739       |                |                  | 5  |
| 9  | 1143.546287       | 572.276782        | 1126.519738    | <b>563.763507</b> | 1125.535722    | 563.271499       | L    | <b>544.320172</b> | 272.663724        | 527.293623        | 264.150449       |                |                  | 4  |
| 10 | 1271.604865       | 636.306071        | 1254.578316    | 627.792796        | 1253.594300    | 627.300788       | Q    | <b>431.236108</b> | 216.121692        | <b>414.209559</b> | 207.608417       |                |                  | 3  |
| 11 | 1399.663443       | 700.335360        | 1382.636894    | 691.822085        | 1381.652878    | 691.330077       | Q    | <b>303.177530</b> | 152.092403        | 286.150981        | 143.579129       |                |                  | 2  |
| 12 |                   |                   |                |                   |                |                  | R    | <b>175.118952</b> | 88.063114         | 158.092403        | 79.549839        |                |                  | 1  |

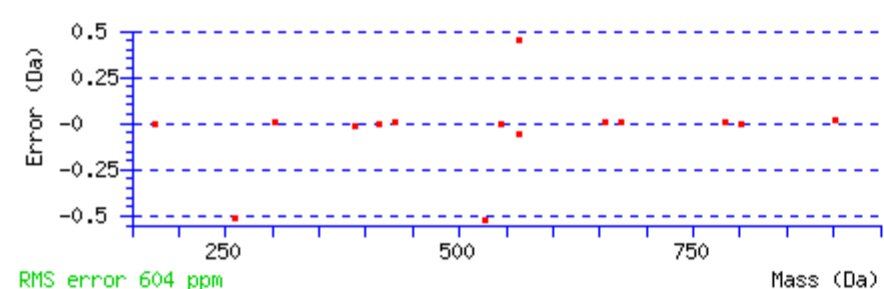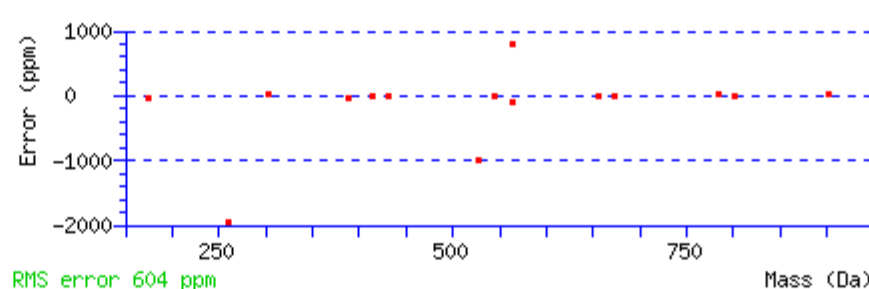

NCBI BLAST search of **LQMEQQQLQQR**

(Parameters: blastp, nr protein database, expect=20000, no filter, PAM30)

Other BLAST [web gateways](#)

**All matches to this query**

| Score | Mr(calc):   | Delta     | Sequence                        |
|-------|-------------|-----------|---------------------------------|
| 34.6  | 1572.767822 | 0.003220  | <a href="#">LQMEQQQLQQR</a>     |
| 12.1  | 1572.756592 | 0.014450  | <a href="#">CQQPASELLQDVR</a>   |
| 7.2   | 1572.763123 | 0.007919  | <a href="#">ALPTPSDSTLPAEAR</a> |
| 3.1   | 1572.785583 | -0.014541 | <a href="#">SRATSVGDQLEAPAR</a> |
| 2.0   | 1572.785599 | -0.014557 | <a href="#">NRAEDQTSPPVVTTR</a> |
| 1.8   | 1572.767822 | 0.003220  | <a href="#">MDAPRASAAKPPTGR</a> |
| 1.8   | 1572.767822 | 0.003220  | <a href="#">MDAPRASAAKPPTGR</a> |
| 1.6   | 1572.783081 | -0.012039 | <a href="#">IRPSAVYVCGEHR</a>   |
| 1.5   | 1572.768448 | 0.002594  | <a href="#">VWEAWREEAELR</a>    |
| 0.6   | 1572.781738 | -0.010696 | <a href="#">AGSLSPGQEQMVELK</a> |

**Peptide View**

MS/MS Fragmentation of **GSVDSNWIVGATLEK**

Found in **TOM40\_HUMAN**, Mitochondrial import receptor subunit TOM40 homolog OS=Homo sapiens GN=TOMM40 PE=1 SV=1

Match to Query 49639: 1574.790368 from(788.402460,2+) rtinseconds(3040) index(42661)

Title: Locus:1.1.1.2482.32

Data file 2011-11-10 - TFD - EP 4-4.mgf

Click mouse within plot area to zoom in by factor of two about that point

Or, Plot from  to  Da

Label all possible matches  Label matches used for scoring

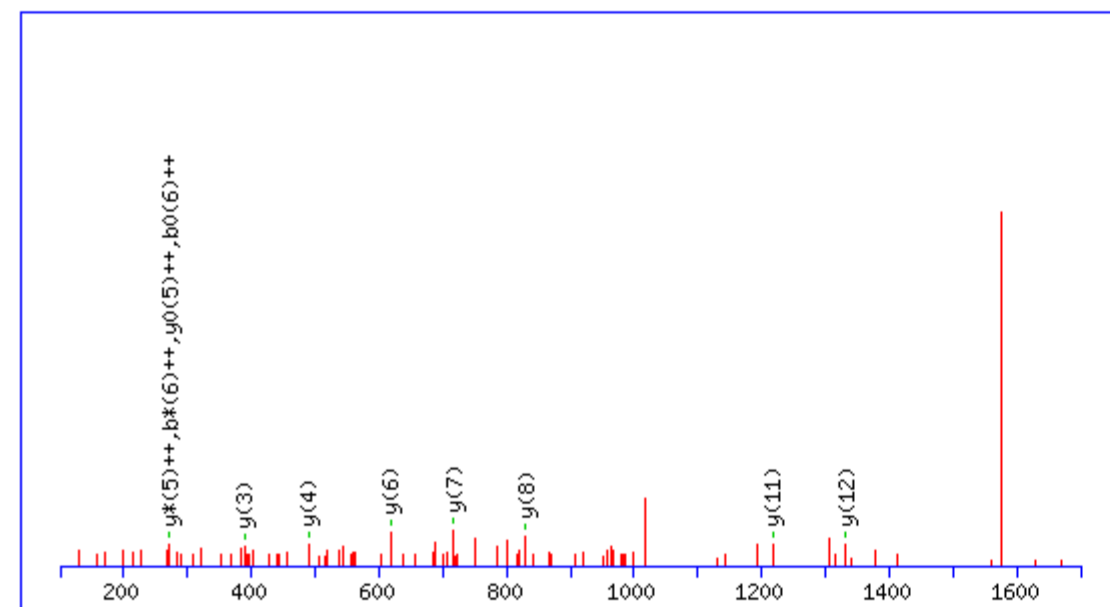

Monoisotopic mass of neutral peptide Mr(calc): 1574.794037

Fixed modifications: Propionamide (C) (apply to specified residues or termini only)

Ions Score: 44 Expect: 0.0014

Matches : 11/154 fragment ions using 13 most intense peaks [\(help\)](#)

| #  | b           | b <sup>++</sup> | b <sup>*</sup> | b <sup>*++</sup>  | b <sup>0</sup> | b <sup>0++</sup>  | Seq. | y                  | y <sup>++</sup> | y <sup>*</sup> | y <sup>*++</sup>  | y <sup>0</sup> | y <sup>0++</sup>  | #  |
|----|-------------|-----------------|----------------|-------------------|----------------|-------------------|------|--------------------|-----------------|----------------|-------------------|----------------|-------------------|----|
| 1  | 58.028740   | 29.518008       |                |                   |                |                   | G    |                    |                 |                |                   |                |                   | 15 |
| 2  | 145.060768  | 73.034022       |                |                   | 127.050203     | 64.028740         | S    | 1518.779849        | 759.893563      | 1501.753300    | 751.380288        | 1500.769284    | 750.888280        | 14 |
| 3  | 244.129182  | 122.568229      |                |                   | 226.118617     | 113.562947        | V    | 1431.747821        | 716.377549      | 1414.721272    | 707.864274        | 1413.737256    | 707.372266        | 13 |
| 4  | 359.156125  | 180.081701      |                |                   | 341.145560     | 171.076418        | D    | <b>1332.679407</b> | 666.843342      | 1315.652858    | 658.330067        | 1314.668842    | 657.838059        | 12 |
| 5  | 446.188153  | 223.597715      |                |                   | 428.177588     | 214.592432        | S    | <b>1217.652464</b> | 609.329870      | 1200.625915    | 600.816596        | 1199.641899    | 600.324588        | 11 |
| 6  | 560.231080  | 280.619178      | 543.204531     | <b>272.105904</b> | 542.220515     | <b>271.613896</b> | N    | 1130.620436        | 565.813856      | 1113.593887    | 557.300582        | 1112.609871    | 556.808574        | 10 |
| 7  | 746.310393  | 373.658835      | 729.283844     | 365.145560        | 728.299828     | 364.653552        | W    | 1016.577509        | 508.792393      | 999.550960     | 500.279118        | 998.566944     | 499.787110        | 9  |
| 8  | 859.394457  | 430.200867      | 842.367908     | 421.687592        | 841.383892     | 421.195584        | I    | <b>830.498196</b>  | 415.752736      | 813.471647     | 407.239462        | 812.487631     | 406.747454        | 8  |
| 9  | 958.462871  | 479.735074      | 941.436322     | 471.221799        | 940.452306     | 470.729791        | V    | <b>717.414132</b>  | 359.210704      | 700.387583     | 350.697430        | 699.403567     | 350.205422        | 7  |
| 10 | 1015.484335 | 508.245806      | 998.457786     | 499.732531        | 997.473770     | 499.240523        | G    | <b>618.345718</b>  | 309.676497      | 601.319169     | 301.163223        | 600.335153     | 300.671215        | 6  |
| 11 | 1086.521449 | 543.764363      | 1069.494900    | 535.251088        | 1068.510884    | 534.759080        | A    | 561.324254         | 281.165765      | 544.297705     | <b>272.652491</b> | 543.313689     | <b>272.160483</b> | 5  |
| 12 | 1187.569128 | 594.288202      | 1170.542579    | 585.774928        | 1169.558563    | 585.282920        | T    | <b>490.287140</b>  | 245.647208      | 473.260591     | 237.133934        | 472.276575     | 236.641926        | 4  |
| 13 | 1300.653192 | 650.830234      | 1283.626643    | 642.316960        | 1282.642627    | 641.824952        | L    | <b>389.239461</b>  | 195.123369      | 372.212912     | 186.610094        | 371.228896     | 186.118086        | 3  |
| 14 | 1429.695785 | 715.351531      | 1412.669236    | 706.838256        | 1411.685220    | 706.346248        | E    | 276.155397         | 138.581337      | 259.128848     | 130.068062        | 258.144832     | 129.576054        | 2  |
| 15 |             |                 |                |                   |                |                   | K    | 147.112804         | 74.060040       | 130.086255     | 65.546765         |                |                   | 1  |

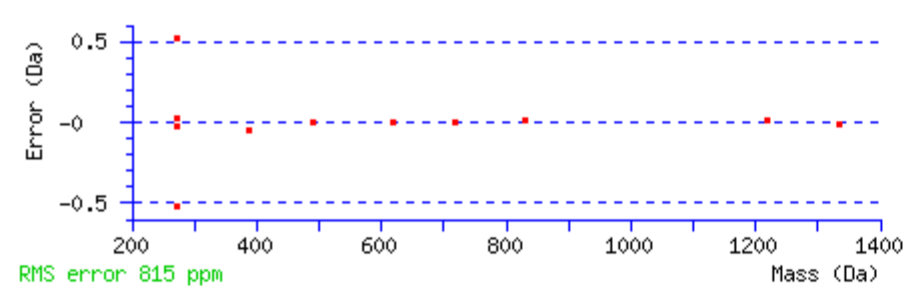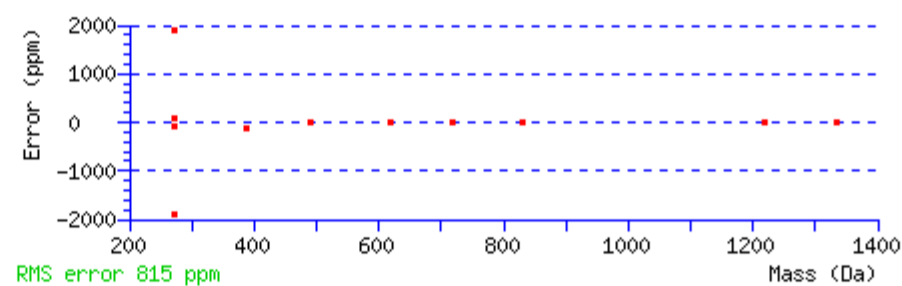

NCBI BLAST search of [GSVDSNWIVGATLEK](#)

(Parameters: blastp, nr protein database, expect=20000, no filter, PAM30)

Other BLAST [web gateways](#)

**All matches to this query**

| Score | Mr(calc):   | Delta     | Sequence                        |
|-------|-------------|-----------|---------------------------------|
| 43.9  | 1574.794037 | -0.003669 | <a href="#">GSVDSNWIVGATLEK</a> |
| 16.3  | 1574.776276 | 0.014092  | <a href="#">TPADCPVIAIDSFR</a>  |

# MASCOT Search Results

## Peptide View

MS/MS Fragmentation of **NLSDIDLMAPQPGV**

Found in **TOM6\_HUMAN**, Mitochondrial import receptor subunit TOM6 homolog OS=Homo sapiens GN=TOMM6 PE=1 SV=1

Match to Query 38793: 1484.714288 from(743.364420,2+) rtinseconds(3039) index(30848)

Title: Locus:1.1.1.2616.19

Data file 2011-11-10 - TFD - EP 4-7.mgf

Click mouse within plot area to zoom in by factor of two about that point

Or, Plot from  to  Da

Label all possible matches  Label matches used for scoring

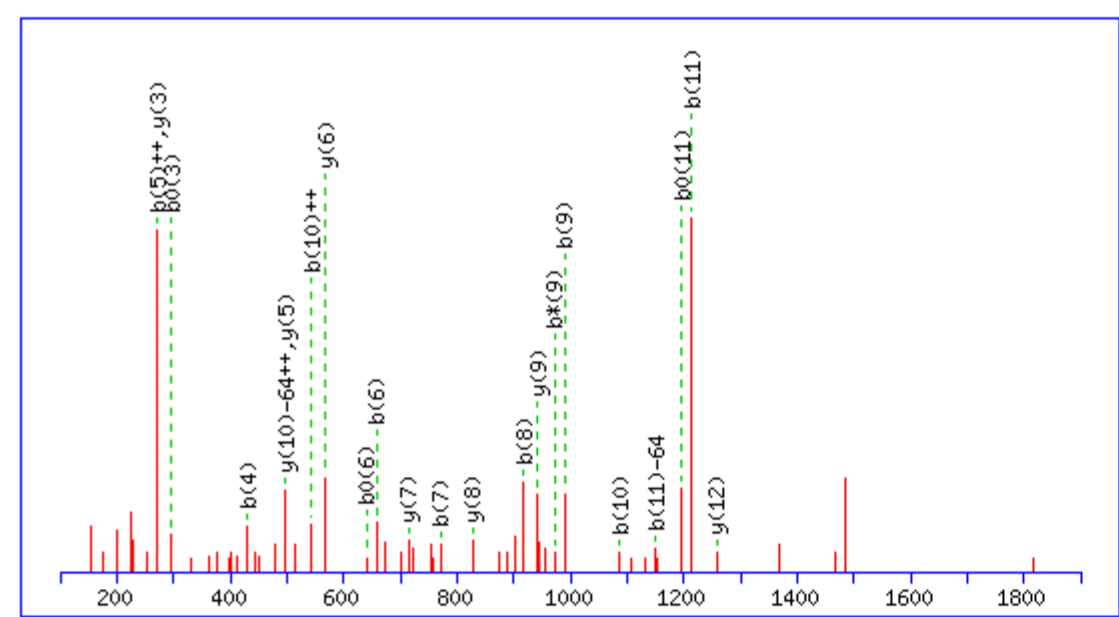

Monoisotopic mass of neutral peptide Mr(calc): 1484.718094

Fixed modifications: Propionamide (C) (apply to specified residues or termini only)

Variable modifications:

M8 : Oxidation (M), with neutral losses 0.000000 (shown in table), 63.998285

Ions Score: 68 Expect: 5.6e-007

Matches : 22/204 fragment ions using 25 most intense peaks [\(help\)](#)

| #  | b           | b <sup>++</sup> | b <sup>*</sup> | b <sup>*++</sup> | b <sup>0</sup> | b <sup>0++</sup> | Seq. | y           | y <sup>++</sup> | y <sup>*</sup> | y <sup>*++</sup> | y <sup>0</sup> | y <sup>0++</sup> | #  |
|----|-------------|-----------------|----------------|------------------|----------------|------------------|------|-------------|-----------------|----------------|------------------|----------------|------------------|----|
| 1  | 115.050203  | 58.028740       | 98.023654      | 49.515465        |                |                  | N    |             |                 |                |                  |                |                  | 14 |
| 2  | 228.134267  | 114.570771      | 211.107718     | 106.057497       |                |                  | L    | 1371.682445 | 686.344860      | 1354.655896    | 677.831586       | 1353.671880    | 677.339578       | 13 |
| 3  | 315.166295  | 158.086785      | 298.139746     | 149.573511       | 297.155730     | 149.081503       | S    | 1258.598381 | 629.802828      | 1241.571832    | 621.289554       | 1240.587816    | 620.797546       | 12 |
| 4  | 430.193238  | 215.600257      | 413.166689     | 207.086983       | 412.182673     | 206.594975       | D    | 1171.566353 | 586.286814      | 1154.539804    | 577.773540       | 1153.555788    | 577.281532       | 11 |
| 5  | 543.277302  | 272.142289      | 526.250753     | 263.629015       | 525.266737     | 263.137007       | I    | 1056.539410 | 528.773343      | 1039.512861    | 520.260068       | 1038.528845    | 519.768060       | 10 |
| 6  | 658.304245  | 329.655761      | 641.277696     | 321.142486       | 640.293680     | 320.650478       | D    | 943.455346  | 472.231311      | 926.428797     | 463.718036       | 925.444781     | 463.226028       | 9  |
| 7  | 771.388309  | 386.197793      | 754.361760     | 377.684518       | 753.377744     | 377.192510       | L    | 828.428403  | 414.717839      | 811.401854     | 406.204565       |                |                  | 8  |
| 8  | 918.423709  | 459.715493      | 901.397160     | 451.202218       | 900.413144     | 450.710210       | M    | 715.344339  | 358.175807      | 698.317790     | 349.662533       |                |                  | 7  |
| 9  | 989.460823  | 495.234050      | 972.434274     | 486.720775       | 971.450258     | 486.228767       | A    | 568.308939  | 284.658107      | 551.282390     | 276.144833       |                |                  | 6  |
| 10 | 1086.513587 | 543.760431      | 1069.487038    | 535.247157       | 1068.503022    | 534.755149       | P    | 497.271825  | 249.139550      | 480.245276     | 240.626276       |                |                  | 5  |
| 11 | 1214.572165 | 607.789720      | 1197.545616    | 599.276446       | 1196.561600    | 598.784438       | Q    | 400.219061  | 200.613168      | 383.192512     | 192.099894       |                |                  | 4  |
| 12 | 1311.624929 | 656.316102      | 1294.598380    | 647.802828       | 1293.614364    | 647.310820       | P    | 272.160483  | 136.583879      |                |                  |                |                  | 3  |
| 13 | 1368.646393 | 684.826834      | 1351.619844    | 676.313560       | 1350.635828    | 675.821552       | G    | 175.107719  | 88.057497       |                |                  |                |                  | 2  |
| 14 |             |                 |                |                  |                |                  | V    | 118.086255  | 59.546766       |                |                  |                |                  | 1  |

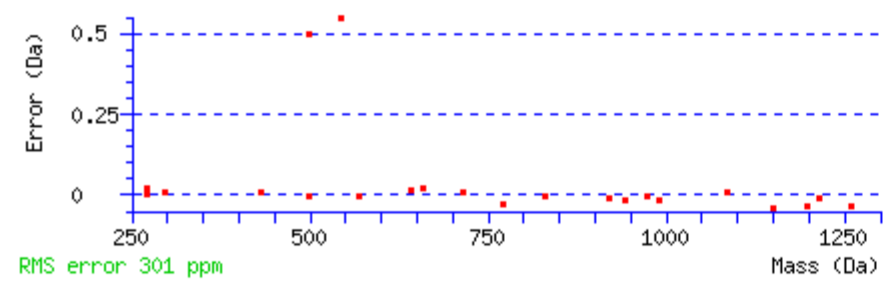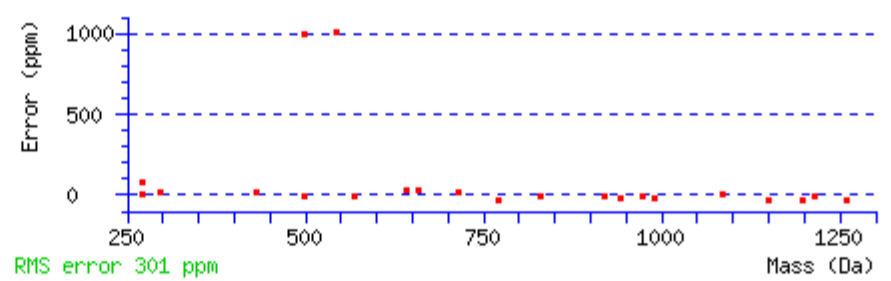

NCBI BLAST search of **NLSDIDLMAPQPGV**

(Parameters: blastp, nr protein database, expect=20000, no filter, PAM30)

Other BLAST [web gateways](#)

### All matches to this query

| Score | Mr(calc):   | Delta     | Sequence                       |
|-------|-------------|-----------|--------------------------------|
| 68.1  | 1484.718094 | -0.003806 | <a href="#">NLSDIDLMAPQPGV</a> |
| 34.6  | 1484.718094 | -0.003806 | <a href="#">NLSDIDLMAPQPGV</a> |
| 14.6  | 1484.718094 | -0.003806 | <a href="#">NLSDIDLMAPQPGV</a> |
| 1.4   | 1484.704163 | 0.010125  | <a href="#">CPAGHKQSETTQK</a>  |
| 1.0   | 1484.725937 | -0.011649 | <a href="#">LSDLEAQWAPSPR</a>  |
| 0.8   | 1484.727295 | -0.013007 | <a href="#">ENRPPGTFHQFR</a>   |

# MASCOT Search Results

## Peptide View

### MS/MS Fragmentation of SAIYPTSAK

Found in **MSRA\_HUMAN**, Mitochondrial peptide methionine sulfoxide reductase OS=Homo sapiens GN=MSRA PE=1 SV=1

Match to Query 10647: 936.488168 from(469.251360,2+) rtinseconds(1238) index(3885)

Title: Locus:1.1.1.2056.15

Data file 2011-11-12 - TFD - EP 5-5.mgf

Click mouse within plot area to zoom in by factor of two about that point

Or, Plot from  to  Da

Label all possible matches  Label matches used for scoring

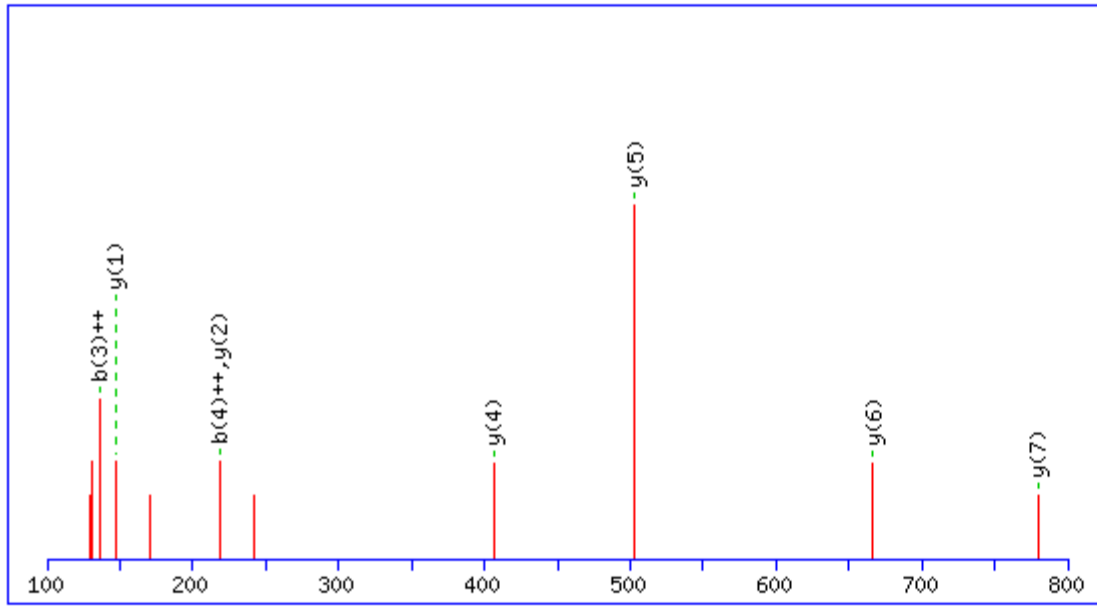

Monoisotopic mass of neutral peptide Mr(calc): 936.491623

Fixed modifications: Propionamide (C) (apply to specified residues or termini only)

Ions Score: 57 Expect: 1.5e-005

Matches : 8/76 fragment ions using 9 most intense peaks ([help](#))

| # | b          | b <sup>++</sup>   | b <sup>0</sup> | b <sup>0++</sup> | Seq. | y                 | y <sup>++</sup> | y <sup>*</sup> | y <sup>*++</sup> | y <sup>0</sup> | y <sup>0++</sup> | # |
|---|------------|-------------------|----------------|------------------|------|-------------------|-----------------|----------------|------------------|----------------|------------------|---|
| 1 | 88.039304  | 44.523290         | 70.028739      | 35.518008        | S    |                   |                 |                |                  |                |                  | 9 |
| 2 | 159.076418 | 80.041847         | 141.065853     | 71.036564        | A    | 850.466896        | 425.737086      | 833.440347     | 417.223812       | 832.456331     | 416.731804       | 8 |
| 3 | 272.160482 | <b>136.583879</b> | 254.149917     | 127.578597       | I    | <b>779.429782</b> | 390.218529      | 762.403233     | 381.705255       | 761.419217     | 381.213247       | 7 |
| 4 | 435.223811 | <b>218.115544</b> | 417.213246     | 209.110261       | Y    | <b>666.345718</b> | 333.676497      | 649.319169     | 325.163223       | 648.335153     | 324.671215       | 6 |
| 5 | 532.276575 | 266.641926        | 514.266010     | 257.636643       | P    | <b>503.282389</b> | 252.144832      | 486.255840     | 243.631558       | 485.271824     | 243.139550       | 5 |
| 6 | 633.324254 | 317.165765        | 615.313689     | 308.160483       | T    | <b>406.229625</b> | 203.618450      | 389.203076     | 195.105176       | 388.219060     | 194.613168       | 4 |
| 7 | 720.356282 | 360.681779        | 702.345717     | 351.676497       | S    | 305.181946        | 153.094611      | 288.155397     | 144.581336       | 287.171381     | 144.089328       | 3 |
| 8 | 791.393396 | 396.200336        | 773.382831     | 387.195054       | A    | <b>218.149918</b> | 109.578597      | 201.123369     | 101.065322       |                |                  | 2 |
| 9 |            |                   |                |                  | K    | <b>147.112804</b> | 74.060040       | 130.086255     | 65.546765        |                |                  | 1 |

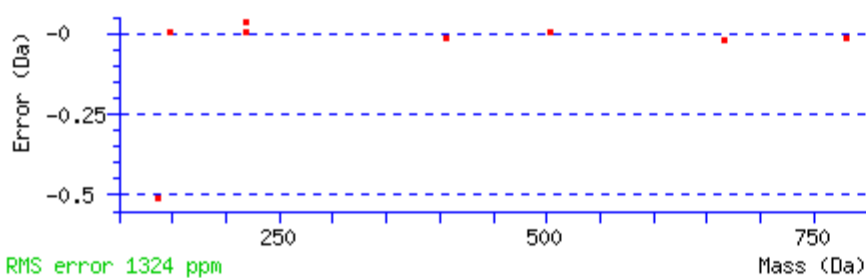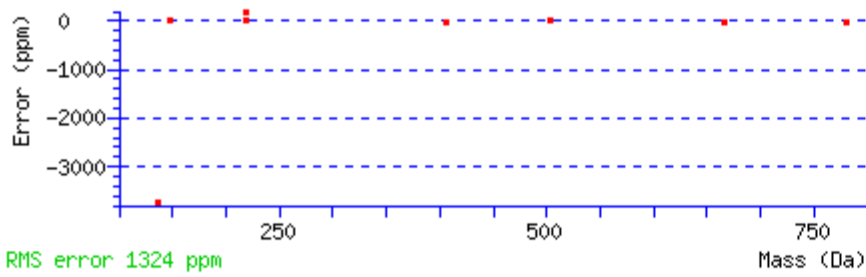

### NCBI BLAST search of SAIYPTSAK

(Parameters: blastp, nr protein database, expect=20000, no filter, PAM30)

Other BLAST [web gateways](#)

### All matches to this query

| Score | Mr(calc):  | Delta     | Sequence                  |
|-------|------------|-----------|---------------------------|
| 56.9  | 936.491623 | -0.003455 | <a href="#">SAIYPTSAK</a> |
| 21.6  | 936.491653 | -0.003485 | <a href="#">TGISDVFAK</a> |
| 14.9  | 936.485107 | 0.003061  | <a href="#">ASLPHGPMK</a> |
| 1.6   | 936.488953 | -0.000785 | <a href="#">RGPQPNPR</a>  |
| 1.1   | 936.488937 | -0.000769 | <a href="#">RDHRPEK</a>   |

**Peptide View**

MS/MS Fragmentation of **RSLNSSSSPPSSPTMMPR**

Found in **M3KL4\_HUMAN**, Mitogen-activated protein kinase kinase kinase MLK4 OS=Homo sapiens GN=MLK4 PE=1 SV=1

Match to Query 17731: 2036.944176 from(510.243320,4+) rtinseconds(1016) index(2805)

Title: Locus:1.1.1.1701.21

Data file 2011-11-10 - TFD - EP 4-5.mgf

Click mouse within plot area to zoom in by factor of two about that point

Or, Plot from  to  Da

Label all possible matches  Label matches used for scoring

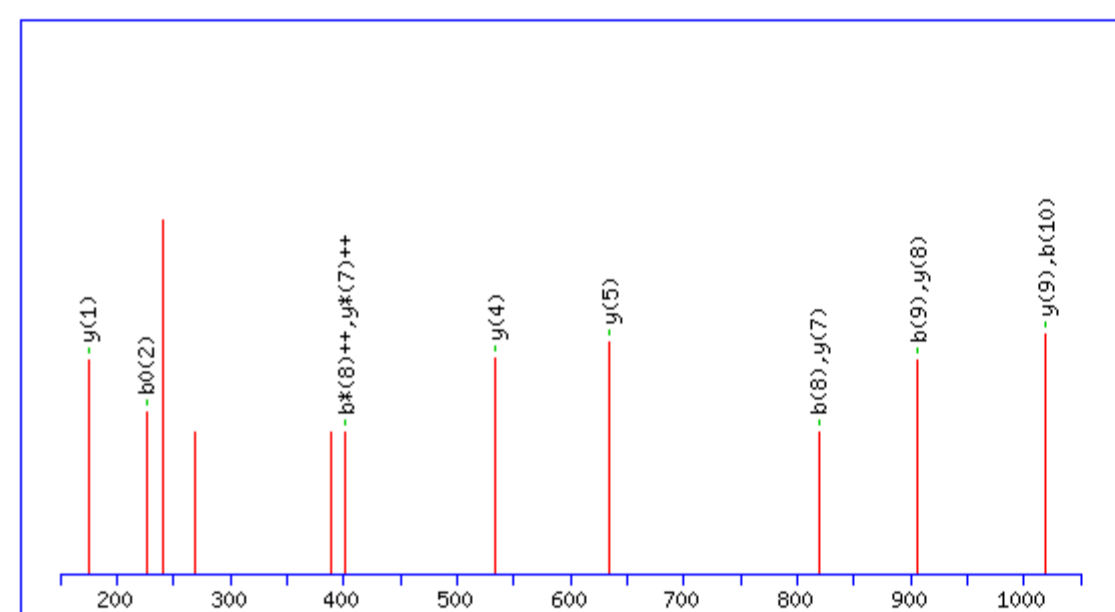

Monoisotopic mass of neutral peptide Mr(calc): 2036.925522

Fixed modifications: Propionamide (C) (apply to specified residues or termini only)

Variable modifications:

P10 : Oxidation (P)

P11 : Oxidation (P)

Ions Score: 46 Expect: 0.00071

Matches : 12/206 fragment ions using 10 most intense peaks [\(help\)](#)

| #  | b           | b <sup>++</sup> | b <sup>+</sup> | b <sup>+++</sup> | b <sup>0</sup> | b <sup>0++</sup> | Seq. | y           | y <sup>++</sup> | y <sup>+</sup> | y <sup>+++</sup> | y <sup>0</sup> | y <sup>0++</sup> | #  |
|----|-------------|-----------------|----------------|------------------|----------------|------------------|------|-------------|-----------------|----------------|------------------|----------------|------------------|----|
| 1  | 157.108387  | 79.057831       | 140.081838     | 70.544557        |                |                  | R    |             |                 |                |                  |                |                  | 19 |
| 2  | 244.140415  | 122.573845      | 227.113866     | 114.060571       | 226.129850     | 113.568563       | S    | 1881.831702 | 941.419489      | 1864.805153    | 932.906215       | 1863.821137    | 932.414207       | 18 |
| 3  | 357.224479  | 179.115877      | 340.197930     | 170.602603       | 339.213914     | 170.110595       | L    | 1794.799674 | 897.903475      | 1777.773125    | 889.390201       | 1776.789109    | 888.898193       | 17 |
| 4  | 471.267406  | 236.137341      | 454.240857     | 227.624067       | 453.256841     | 227.132059       | N    | 1681.715610 | 841.361443      | 1664.689061    | 832.848169       | 1663.705045    | 832.356161       | 16 |
| 5  | 558.299434  | 279.653355      | 541.272885     | 271.140081       | 540.288869     | 270.648073       | S    | 1567.672683 | 784.339980      | 1550.646134    | 775.826705       | 1549.662118    | 775.334697       | 15 |
| 6  | 645.331462  | 323.169369      | 628.304913     | 314.656094       | 627.320897     | 314.164087       | S    | 1480.640655 | 740.823966      | 1463.614106    | 732.310691       | 1462.630090    | 731.818683       | 14 |
| 7  | 732.363490  | 366.685383      | 715.336941     | 358.172108       | 714.352925     | 357.680100       | S    | 1393.608627 | 697.307952      | 1376.582078    | 688.794677       | 1375.598062    | 688.302669       | 13 |
| 8  | 819.395518  | 410.201397      | 802.368969     | 401.688122       | 801.384953     | 401.196114       | S    | 1306.576599 | 653.791938      | 1289.550050    | 645.278663       | 1288.566034    | 644.786655       | 12 |
| 9  | 906.427546  | 453.717411      | 889.400997     | 445.204136       | 888.416981     | 444.712128       | S    | 1219.544571 | 610.275924      | 1202.518022    | 601.762649       | 1201.534006    | 601.270641       | 11 |
| 10 | 1019.475225 | 510.241250      | 1002.448676    | 501.727976       | 1001.464660    | 501.235968       | P    | 1132.512543 | 566.759910      | 1115.485994    | 558.246635       | 1114.501978    | 557.754627       | 10 |
| 11 | 1132.522904 | 566.765090      | 1115.496355    | 558.251816       | 1114.512339    | 557.759807       | P    | 1019.464864 | 510.236070      | 1002.438315    | 501.722796       | 1001.454299    | 501.230788       | 9  |
| 12 | 1219.554932 | 610.281104      | 1202.528383    | 601.767830       | 1201.544367    | 601.275822       | S    | 906.417185  | 453.712231      | 889.390636     | 445.198956       | 888.406620     | 444.706948       | 8  |
| 13 | 1306.586960 | 653.797118      | 1289.560411    | 645.283844       | 1288.576395    | 644.791836       | S    | 819.385157  | 410.196217      | 802.358608     | 401.682942       | 801.374592     | 401.190934       | 7  |
| 14 | 1403.639724 | 702.323500      | 1386.613175    | 693.810226       | 1385.629159    | 693.318218       | P    | 732.353129  | 366.680203      | 715.326580     | 358.166928       | 714.342564     | 357.674920       | 6  |
| 15 | 1504.687403 | 752.847340      | 1487.660854    | 744.334065       | 1486.676838    | 743.842057       | T    | 635.300365  | 318.153821      | 618.273816     | 309.640546       | 617.289800     | 309.148538       | 5  |
| 16 | 1635.727888 | 818.367582      | 1618.701339    | 809.854308       | 1617.717323    | 809.362300       | M    | 534.252686  | 267.629981      | 517.226137     | 259.116707       |                |                  | 4  |
| 17 | 1766.768373 | 883.887825      | 1749.741824    | 875.374550       | 1748.757808    | 874.882542       | M    | 403.212201  | 202.109738      | 386.185652     | 193.596464       |                |                  | 3  |
| 18 | 1863.821137 | 932.414207      | 1846.794588    | 923.900932       | 1845.810572    | 923.408924       | P    | 272.171716  | 136.589496      | 255.145167     | 128.076221       |                |                  | 2  |
| 19 |             |                 |                |                  |                |                  | R    | 175.118952  | 88.063114       | 158.092403     | 79.549839        |                |                  | 1  |

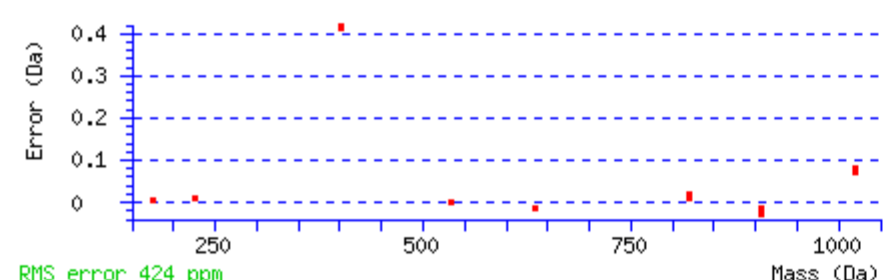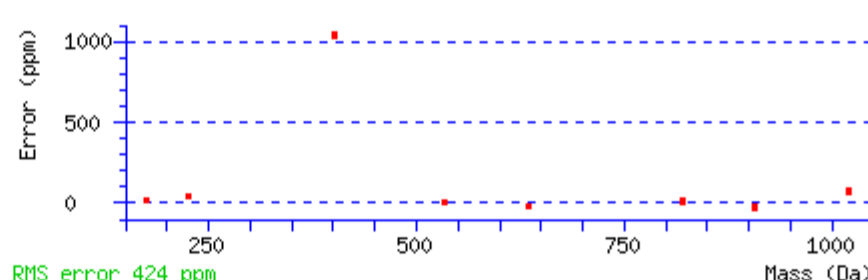

NCBI BLAST search of [RSLNSSSSPPSSPTMMPR](#)

(Parameters: blastp, nr protein database, expect=20000, no filter, PAM30)

Other BLAST [web gateways](#)

**All matches to this query**

| Score | Mr(calc):   | Delta     | Sequence                             |
|-------|-------------|-----------|--------------------------------------|
| 45.8  | 2036.925522 | 0.018654  | <a href="#">RSLNSSSSPPSSPTMMPR</a>   |
| 32.0  | 2036.925522 | 0.018654  | <a href="#">RSLNSSSSPPSSPTMMPR</a>   |
| 19.7  | 2036.925522 | 0.018654  | <a href="#">RSLNSSSSPPSSPTMMPR</a>   |
| 16.9  | 2036.925522 | 0.018654  | <a href="#">RSLNSSSSPPSSPTMMPR</a>   |
| 16.9  | 2036.925522 | 0.018654  | <a href="#">RSLNSSSSPPSSPTMMPR</a>   |
| 16.1  | 2036.951309 | -0.007133 | <a href="#">YSSMEDHLEILEWTLR</a>     |
| 14.3  | 2036.925522 | 0.018654  | <a href="#">RSLNSSSSPPSSPTMMPR</a>   |
| 13.0  | 2036.930054 | 0.014122  | <a href="#">GDARGAQLWPPGSDPDGGPR</a> |
| 11.2  | 2036.930054 | 0.014122  | <a href="#">GDARGAQLWPPGSDPDGGPR</a> |
| 11.2  | 2036.930054 | 0.014122  | <a href="#">GDARGAQLWPPGSDPDGGPR</a> |

# **MASCOT** Mascot Search Results

## Peptide View

### MS/MS Fragmentation of EIFDLIR

Found in **MIP18\_HUMAN**, Mitotic spindle-associated MMXD complex subunit MIP18 OS=Homo sapiens GN=FAM96B PE=1 SV=1

Match to Query 8267: 904.504328 from(453.259440,2+) rtinseconds(3128) index(34932)

Title: Locus:1.1.1.2647.10

Data file 2011-11-13 - TFD - EP 7-7.mgf

Click mouse within plot area to zoom in by factor of two about that point

Or, Plot from  to  Da

Label all possible matches  Label matches used for scoring

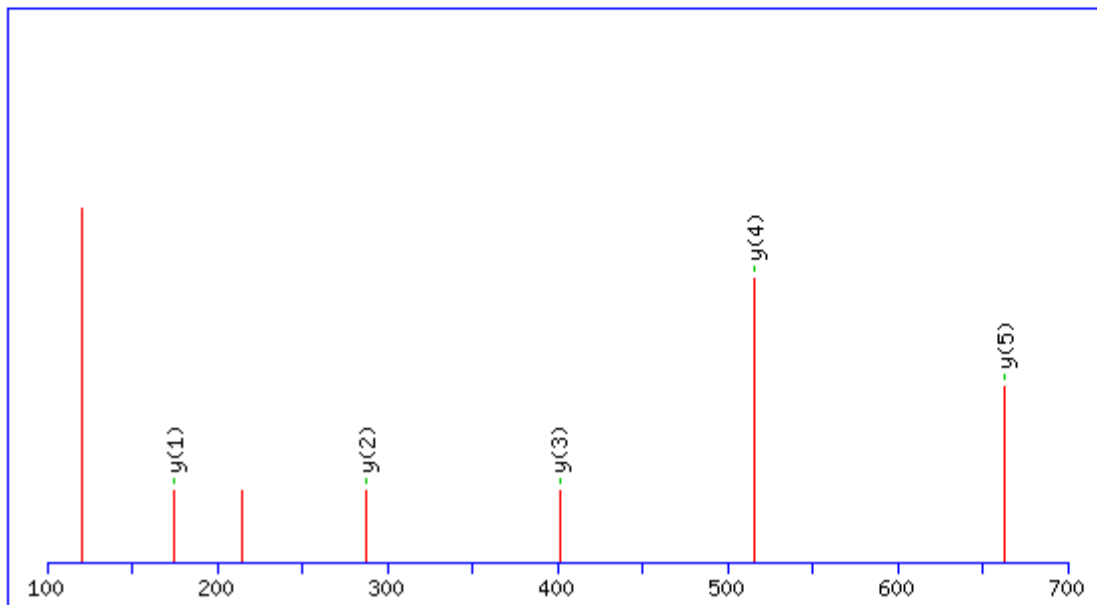

Monoisotopic mass of neutral peptide Mr(calc): 904.501801

Fixed modifications: Propionamide (C) (apply to specified residues or termini only)

Ions Score: 47 Expect: 0.00023

Matches : 5/54 fragment ions using 6 most intense peaks ([help](#))

| # | b          | b <sup>++</sup> | b <sup>0</sup> | b <sup>0++</sup> | Seq. | y                 | y <sup>++</sup> | y <sup>*</sup> | y <sup>*++</sup> | y <sup>0</sup> | y <sup>0++</sup> | # |
|---|------------|-----------------|----------------|------------------|------|-------------------|-----------------|----------------|------------------|----------------|------------------|---|
| 1 | 130.049869 | 65.528572       | 112.039304     | 56.523290        | E    |                   |                 |                |                  |                |                  | 7 |
| 2 | 243.133933 | 122.070605      | 225.123368     | 113.065322       | I    | 776.466501        | 388.736889      | 759.439952     | 380.223614       | 758.455936     | 379.731606       | 6 |
| 3 | 390.202347 | 195.604811      | 372.191782     | 186.599529       | F    | <b>663.382437</b> | 332.194857      | 646.355888     | 323.681582       | 645.371872     | 323.189574       | 5 |
| 4 | 505.229290 | 253.118283      | 487.218725     | 244.113001       | D    | <b>516.314023</b> | 258.660650      | 499.287474     | 250.147375       | 498.303458     | 249.655367       | 4 |
| 5 | 618.313354 | 309.660315      | 600.302789     | 300.655033       | L    | <b>401.287080</b> | 201.147178      | 384.260531     | 192.633903       |                |                  | 3 |
| 6 | 731.397418 | 366.202347      | 713.386853     | 357.197065       | I    | <b>288.203016</b> | 144.605146      | 271.176467     | 136.091871       |                |                  | 2 |
| 7 |            |                 |                |                  | R    | <b>175.118952</b> | 88.063114       | 158.092403     | 79.549839        |                |                  | 1 |

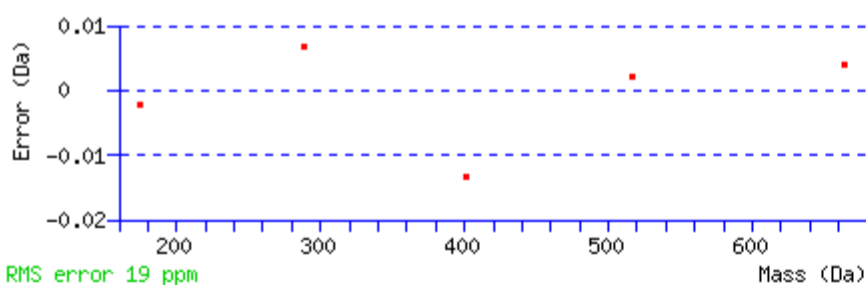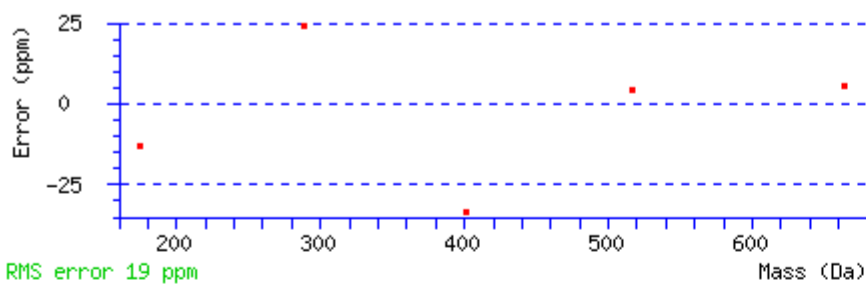

### NCBI BLAST search of EIFDLIR

(Parameters: blastp, nr protein database, expect=20000, no filter, PAM30)

Other BLAST [web gateways](#)

### All matches to this query

| Score | Mr(calc):  | Delta     | Sequence                  |
|-------|------------|-----------|---------------------------|
| 46.7  | 904.501801 | 0.002527  | <a href="#">EIFDLIR</a>   |
| 30.2  | 904.513031 | -0.008703 | <a href="#">NKFIDLR</a>   |
| 12.7  | 904.513031 | -0.008703 | <a href="#">AAGAFSLLR</a> |
| 4.9   | 904.497803 | 0.006525  | <a href="#">SVVGTSSLR</a> |
| 4.5   | 904.501801 | 0.002527  | <a href="#">IEFLQQK</a>   |
| 2.6   | 904.501801 | 0.002527  | <a href="#">IYLLPDR</a>   |
| 2.6   | 904.501801 | 0.002527  | <a href="#">YLPLDR</a>    |
| 1.0   | 904.513031 | -0.008703 | <a href="#">EIKNVFR</a>   |

# MASCOT SCIENCE Mascot Search Results

## Peptide View

MS/MS Fragmentation of **AASLEAVSYAIDTLK**

Found in **MOC2B\_HUMAN**, Molybdopterin synthase catalytic subunit OS=Homo sapiens GN=MOCS2 PE=1 SV=1

Match to Query 45342: 1550.819008 from(776.416780,2+) rtinseconds(3646) index(49256)

Title: Locus:1.1.1.2972.37

Data file 2011-11-12 - TFD - EP 5-5.mgf

Click mouse within plot area to zoom in by factor of two about that point

Or, Plot from  to  Da

Label all possible matches  Label matches used for scoring

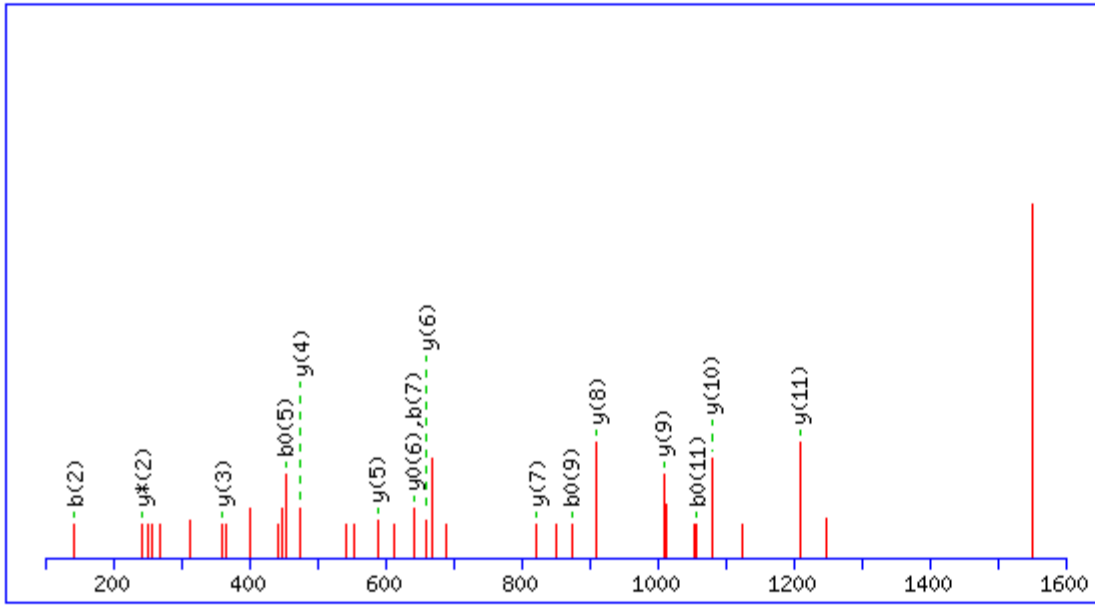

Monoisotopic mass of neutral peptide Mr(calc): 1550.819153

Fixed modifications: Propionamide (C) (apply to specified residues or termini only)

Ions Score: 59 Expect: 1.4e-005

Matches : 16/132 fragment ions using 27 most intense peaks [\(help\)](#)

| #  | b                 | b <sup>++</sup> | b <sup>0</sup>     | b <sup>0++</sup> | Seq. | y                  | y <sup>++</sup> | y <sup>*</sup>    | y <sup>*++</sup> | y <sup>0</sup>    | y <sup>0++</sup> | #  |
|----|-------------------|-----------------|--------------------|------------------|------|--------------------|-----------------|-------------------|------------------|-------------------|------------------|----|
| 1  | 72.044390         | 36.525833       |                    |                  | A    |                    |                 |                   |                  |                   |                  | 15 |
| 2  | <b>143.081504</b> | 72.044390       |                    |                  | A    | 1480.789352        | 740.898314      | 1463.762803       | 732.385040       | 1462.778787       | 731.893032       | 14 |
| 3  | 230.113532        | 115.560404      | 212.102967         | 106.555121       | S    | 1409.752238        | 705.379757      | 1392.725689       | 696.866483       | 1391.741673       | 696.374475       | 13 |
| 4  | 343.197596        | 172.102436      | 325.187031         | 163.097153       | L    | 1322.720210        | 661.863743      | 1305.693661       | 653.350469       | 1304.709645       | 652.858460       | 12 |
| 5  | 472.240189        | 236.623732      | <b>454.229624</b>  | 227.618450       | E    | <b>1209.636146</b> | 605.321711      | 1192.609597       | 596.808437       | 1191.625581       | 596.316429       | 11 |
| 6  | 543.277303        | 272.142290      | 525.266738         | 263.137007       | A    | <b>1080.593553</b> | 540.800414      | 1063.567004       | 532.287140       | 1062.582988       | 531.795132       | 10 |
| 7  | <b>642.345717</b> | 321.676497      | 624.335152         | 312.671214       | V    | <b>1009.556439</b> | 505.281858      | 992.529890        | 496.768583       | 991.545874        | 496.276575       | 9  |
| 8  | 729.377745        | 365.192511      | 711.367180         | 356.187228       | S    | <b>910.488025</b>  | 455.747651      | 893.461476        | 447.234376       | 892.477460        | 446.742368       | 8  |
| 9  | 892.441074        | 446.724175      | <b>874.430509</b>  | 437.718893       | Y    | <b>823.455997</b>  | 412.231637      | 806.429448        | 403.718362       | 805.445432        | 403.226354       | 7  |
| 10 | 963.478188        | 482.242732      | 945.467623         | 473.237450       | A    | <b>660.392668</b>  | 330.699972      | 643.366119        | 322.186697       | <b>642.382103</b> | 321.694689       | 6  |
| 11 | 1076.562252       | 538.784764      | <b>1058.551687</b> | 529.779481       | I    | <b>589.355554</b>  | 295.181415      | 572.329005        | 286.668140       | 571.344989        | 286.176132       | 5  |
| 12 | 1191.589195       | 596.298236      | 1173.578630        | 587.292953       | D    | <b>476.271490</b>  | 238.639383      | 459.244941        | 230.126108       | 458.260925        | 229.634100       | 4  |
| 13 | 1292.636874       | 646.822075      | 1274.626309        | 637.816793       | T    | <b>361.244547</b>  | 181.125911      | 344.217998        | 172.612637       | 343.233982        | 172.120629       | 3  |
| 14 | 1405.720938       | 703.364107      | 1387.710373        | 694.358824       | L    | 260.196868         | 130.602072      | <b>243.170319</b> | 122.088797       |                   |                  | 2  |
| 15 |                   |                 |                    |                  | K    | 147.112804         | 74.060040       | 130.086255        | 65.546765        |                   |                  | 1  |

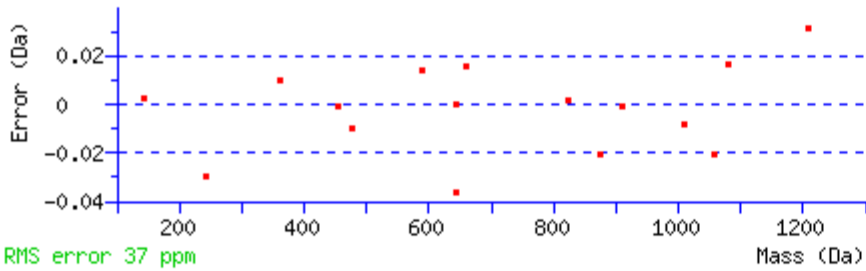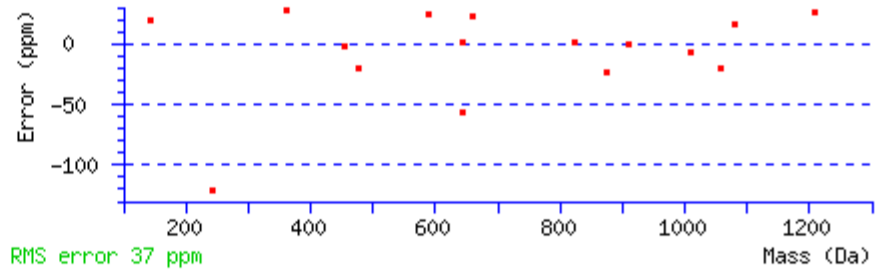

NCBI BLAST search of [AASLEAVSYAIDTLK](#)

(Parameters: blastp, nr protein database, expect=20000, no filter, PAM30)

Other BLAST [web gateways](#)

All matches to this query

| Score | Mr(calc):   | Delta     | Sequence                        |
|-------|-------------|-----------|---------------------------------|
| 58.7  | 1550.819153 | -0.000145 | <a href="#">AASLEAVSYAIDTLK</a> |

Mascot: <http://www.matrixscience.com/>

# MASCOT Search Results

## Peptide View

MS/MS Fragmentation of **ETPPDALILESPFTNIR**

Found in **ABD12\_HUMAN**, Monoacylglycerol lipase ABHD12 OS=Homo sapiens GN=ABHD12 PE=2 SV=2

Match to Query 61309: 1912.007292 from(638.343040,3+) rtinseconds(3851) index(57435)

Title: Locus:1.1.1.2802.17

Data file 2011-11-10 - TFD - EP 3-4.mgf

Click mouse within plot area to zoom in by factor of two about that point

Or, Plot from  to  Da

Label all possible matches  Label matches used for scoring

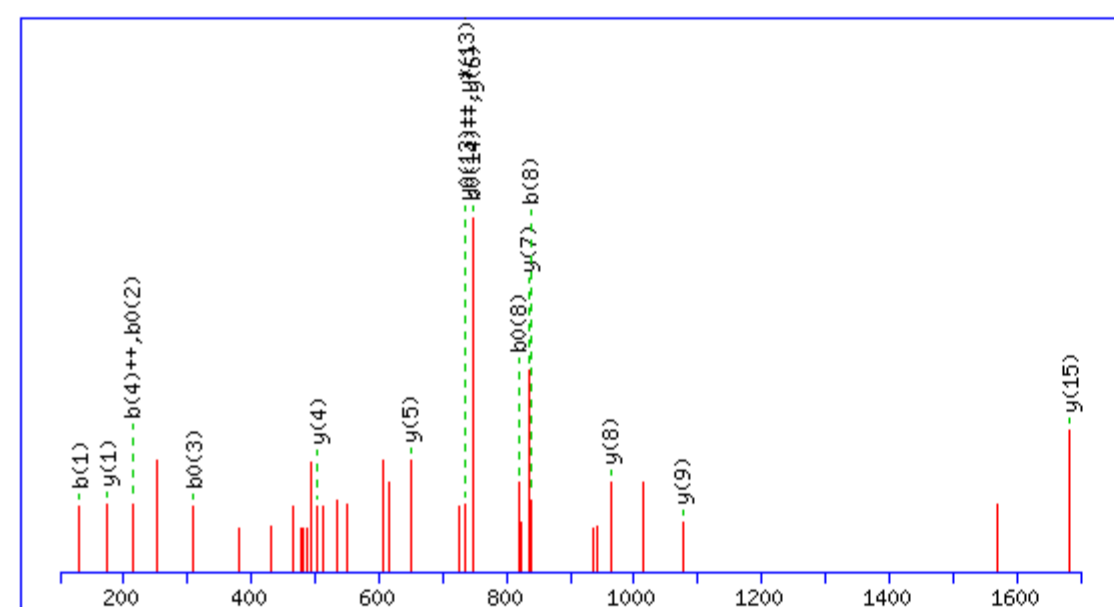

Monoisotopic mass of neutral peptide  $M_r(\text{calc})$ : 1911.994171

Fixed modifications: Propionamide (C) (apply to specified residues or termini only)

Ions Score: 44 Expect: 0.0001

Matches : 17/158 fragment ions using 26 most intense peaks [\(help\)](#)

| #  | b                 | b <sup>++</sup>   | b <sup>*</sup> | b <sup>+++</sup> | b <sup>0</sup>    | b <sup>0++</sup>  | Seq. | y                  | y <sup>++</sup> | y <sup>*</sup> | y <sup>+++</sup>  | y <sup>0</sup> | y <sup>0++</sup>  | #  |
|----|-------------------|-------------------|----------------|------------------|-------------------|-------------------|------|--------------------|-----------------|----------------|-------------------|----------------|-------------------|----|
| 1  | <b>130.049869</b> | 65.528572         |                |                  | 112.039304        | 56.523290         | E    |                    |                 |                |                   |                |                   | 17 |
| 2  | 231.097548        | 116.052412        |                |                  | <b>213.086983</b> | 107.047130        | T    | 1783.958877        | 892.483077      | 1766.932328    | 883.969802        | 1765.948312    | 883.477794        | 16 |
| 3  | 328.150312        | 164.578794        |                |                  | <b>310.139747</b> | 155.573512        | P    | <b>1682.911198</b> | 841.959237      | 1665.884649    | 833.445963        | 1664.900633    | 832.953955        | 15 |
| 4  | 425.203076        | <b>213.105176</b> |                |                  | 407.192511        | 204.099894        | P    | 1585.858434        | 793.432855      | 1568.831885    | 784.919581        | 1567.847869    | 784.427573        | 14 |
| 5  | 540.230019        | 270.618648        |                |                  | 522.219454        | 261.613365        | D    | 1488.805670        | 744.906473      | 1471.779121    | <b>736.393199</b> | 1470.795105    | <b>735.901190</b> | 13 |
| 6  | 611.267133        | 306.137205        |                |                  | 593.256568        | 297.131922        | A    | 1373.778727        | 687.393002      | 1356.752178    | 678.879727        | 1355.768162    | 678.387719        | 12 |
| 7  | 724.351197        | 362.679237        |                |                  | 706.340632        | 353.673954        | L    | 1302.741613        | 651.874445      | 1285.715064    | 643.361170        | 1284.731048    | 642.869162        | 11 |
| 8  | <b>837.435261</b> | 419.221269        |                |                  | <b>819.424696</b> | 410.215986        | I    | 1189.657549        | 595.332413      | 1172.631000    | 586.819138        | 1171.646984    | 586.327130        | 10 |
| 9  | 950.519325        | 475.763301        |                |                  | 932.508760        | 466.758018        | L    | <b>1076.573485</b> | 538.790381      | 1059.546936    | 530.277106        | 1058.562920    | 529.785098        | 9  |
| 10 | 1079.561918       | 540.284597        |                |                  | 1061.551353       | 531.279315        | E    | <b>963.489421</b>  | 482.248349      | 946.462872     | 473.735074        | 945.478856     | 473.243066        | 8  |
| 11 | 1166.593946       | 583.800611        |                |                  | 1148.583381       | 574.795329        | S    | <b>834.446828</b>  | 417.727052      | 817.420279     | 409.213778        | 816.436263     | 408.721770        | 7  |
| 12 | 1263.646710       | 632.326993        |                |                  | 1245.636145       | 623.321711        | P    | <b>747.414800</b>  | 374.211038      | 730.388251     | 365.697764        | 729.404235     | 365.205756        | 6  |
| 13 | 1410.715124       | 705.861200        |                |                  | 1392.704559       | 696.855918        | F    | <b>650.362036</b>  | 325.684656      | 633.335487     | 317.171382        | 632.351471     | 316.679374        | 5  |
| 14 | 1511.762803       | 756.385040        |                |                  | 1493.752238       | <b>747.379757</b> | T    | <b>503.293622</b>  | 252.150449      | 486.267073     | 243.637174        | 485.283057     | 243.145166        | 4  |
| 15 | 1625.805730       | 813.406503        | 1608.779181    | 804.893229       | 1607.795165       | 804.401221        | N    | 402.245943         | 201.626609      | 385.219394     | 193.113335        |                |                   | 3  |
| 16 | 1738.889794       | 869.948535        | 1721.863245    | 861.435261       | 1720.879229       | 860.943253        | I    | 288.203016         | 144.605146      | 271.176467     | 136.091871        |                |                   | 2  |
| 17 |                   |                   |                |                  |                   |                   | R    | <b>175.118952</b>  | 88.063114       | 158.092403     | 79.549839         |                |                   | 1  |

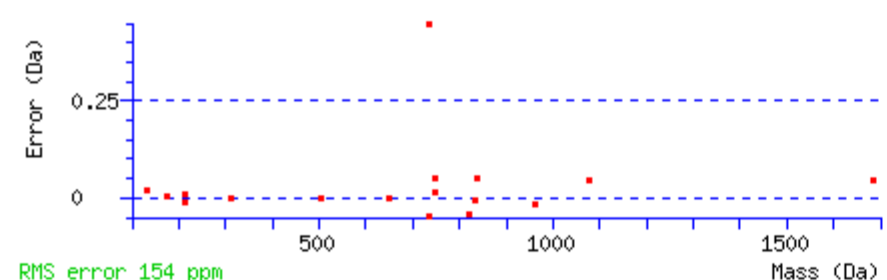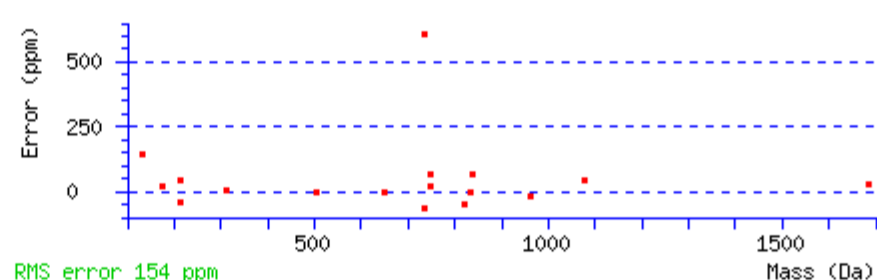

NCBI BLAST search of **ETPPDALILESPFTNIR**

(Parameters: blastp, nr protein database, expect=20000, no filter, PAM30)

Other BLAST [web gateways](#)

## All matches to this query

| Score | $M_r(\text{calc})$ : | Delta     | Sequence                           |
|-------|----------------------|-----------|------------------------------------|
| 44.3  | 1911.994171          | 0.013121  | <a href="#">ETPPDALILESPFTNIR</a>  |
| 1.7   | 1912.024048          | -0.016756 | <a href="#">MVPIIPGGNSIPLTFSNR</a> |
| 1.0   | 1911.994171          | 0.013121  | <a href="#">VFPALAGQAPEEQGEIHK</a> |
| 0.9   | 1911.998917          | 0.008375  | <a href="#">QDVMVHFIVPVKNQAR</a>   |
| 0.0   | 1912.020004          | -0.012712 | <a href="#">KINQNVAALPVASSVMDR</a> |
| 0.0   | 1911.994858          | 0.012434  | <a href="#">AGPAQTLIRPQDMKGASR</a> |



# MASCOT SCIENCE Mascot Search Results

## Peptide View

MS/MS Fragmentation of **ELGPYTLDR**

Found in **MUC16\_HUMAN**, Mucin-16 OS=Homo sapiens GN=MUC16 PE=1 SV=2

Match to Query 346279: 1062.541088 from(532.277820,2+) rtinseconds(2168) index(918962)

Title: Locus:1.1.1.1227.23

Data file C:\Program Files (x86)\Matrix Science\Mascot Daemon\mgf3 TFD - Epitel - R2\mascot\_daemon\_merge.mgf

Click mouse within plot area to zoom in by factor of two about that point

Or, Plot from  to  Da

Label all possible matches  Label matches used for scoring

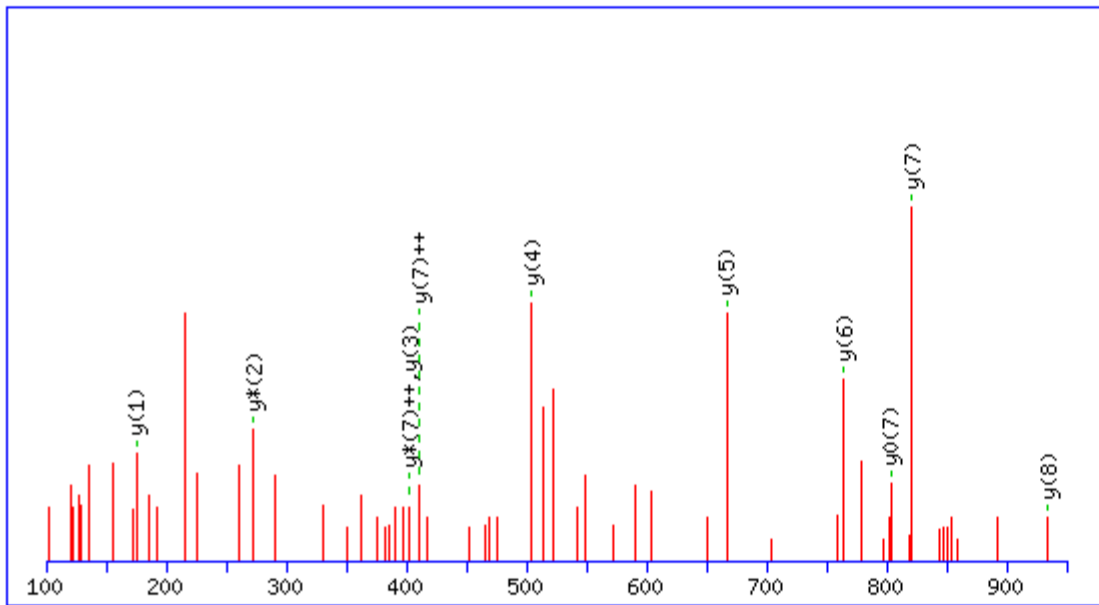

Monoisotopic mass of neutral peptide  $M_r(\text{calc})$ : 1062.534561

Fixed modifications: Carbamidomethyl (C) (apply to specified residues or termini only)

Ions Score: 48 Expect: 0.00017

Matches : 11/78 fragment ions using 17 most intense peaks [\(help\)](#)

| # | b          | b <sup>++</sup> | b <sup>0</sup> | b <sup>0++</sup> | Seq. | y          | y <sup>++</sup> | y <sup>*</sup> | y <sup>+++</sup> | y <sup>0</sup> | y <sup>0++</sup> | # |
|---|------------|-----------------|----------------|------------------|------|------------|-----------------|----------------|------------------|----------------|------------------|---|
| 1 | 130.049869 | 65.528572       | 112.039304     | 56.523290        | E    |            |                 |                |                  |                |                  | 9 |
| 2 | 243.133933 | 122.070605      | 225.123368     | 113.065322       | L    | 934.499259 | 467.753268      | 917.472710     | 459.239993       | 916.488694     | 458.747985       | 8 |
| 3 | 300.155397 | 150.581336      | 282.144832     | 141.576054       | G    | 821.415195 | 411.211236      | 804.388646     | 402.697961       | 803.404630     | 402.205953       | 7 |
| 4 | 397.208161 | 199.107718      | 379.197596     | 190.102436       | P    | 764.393731 | 382.700504      | 747.367182     | 374.187229       | 746.383166     | 373.695221       | 6 |
| 5 | 560.271490 | 280.639383      | 542.260925     | 271.634101       | Y    | 667.340967 | 334.174122      | 650.314418     | 325.660847       | 649.330402     | 325.168839       | 5 |
| 6 | 661.319169 | 331.163223      | 643.308604     | 322.157940       | T    | 504.277638 | 252.642457      | 487.251089     | 244.129182       | 486.267073     | 243.637174       | 4 |
| 7 | 774.403233 | 387.705255      | 756.392668     | 378.699972       | L    | 403.229959 | 202.118617      | 386.203410     | 193.605343       | 385.219394     | 193.113335       | 3 |
| 8 | 889.430176 | 445.218726      | 871.419611     | 436.213444       | D    | 290.145895 | 145.576585      | 273.119346     | 137.063311       | 272.135330     | 136.571303       | 2 |
| 9 |            |                 |                |                  | R    | 175.118952 | 88.063114       | 158.092403     | 79.549839        |                |                  | 1 |

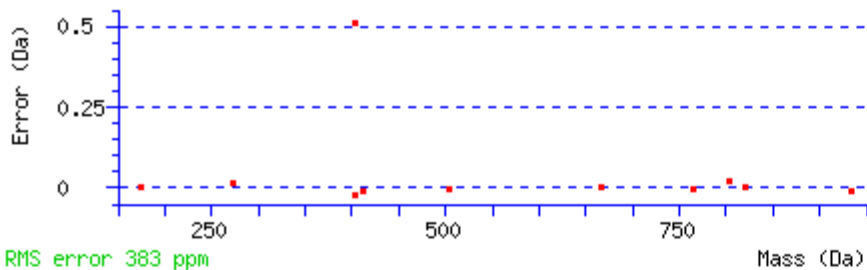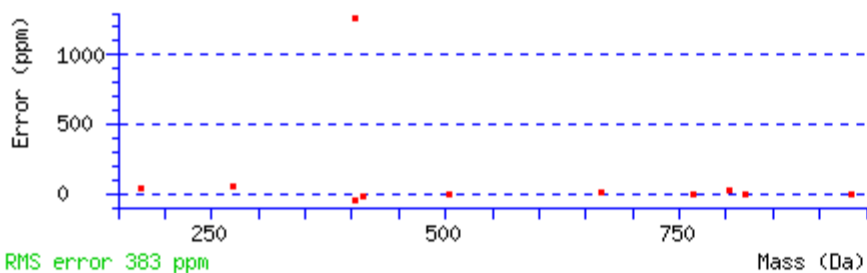

NCBI BLAST search of [ELGPYTLDR](#)

(Parameters: blastp, nr protein database, expect=20000, no filter, PAM30)

Other BLAST [web gateways](#)

All matches to this query

| Score | $M_r(\text{calc})$ : | Delta     | Sequence                    |
|-------|----------------------|-----------|-----------------------------|
| 48.3  | 1062.534561          | 0.006527  | <a href="#">ELGPYTLDR</a>   |
| 7.6   | 1062.534561          | 0.006527  | <a href="#">EPGDLKFNK</a>   |
| 7.1   | 1062.545776          | -0.004688 | <a href="#">EIFQNEKR</a>    |
| 6.0   | 1062.537918          | 0.003170  | <a href="#">EISDLMLAR</a>   |
| 6.0   | 1062.545776          | -0.004688 | <a href="#">ELALGQYNR</a>   |
| 6.0   | 1062.545776          | -0.004688 | <a href="#">ELNEQFKR</a>    |
| 6.0   | 1062.534546          | 0.006542  | <a href="#">EPEKYPLR</a>    |
| 4.3   | 1062.545807          | -0.004719 | <a href="#">GEGGAPPLPPR</a> |
| 4.3   | 1062.545792          | -0.004704 | <a href="#">EPSGLRFNK</a>   |
| 2.3   | 1062.534546          | 0.006542  | <a href="#">IPSAEYLDLDR</a> |

# Mascot Search Results

## Peptide View

MS/MS Fragmentation of **NAVDEFLLLLDK**

Found in **MALT1\_HUMAN**, Mucosa-associated lymphoid tissue lymphoma translocation protein 1 OS=Homo sapiens GN=MALT1 PE=1 SV=1

Match to Query 40867: 1388.760328 from(695.387440,2+) rtinseconds(4565) index(67812)

Title: Locus:1.1.1.3212.14

Data file 2011-11-10 - TFD - EP 4-2.mgf

Click mouse within plot area to zoom in by factor of two about that point

Or, Plot from  to  Da

Label all possible matches  Label matches used for scoring

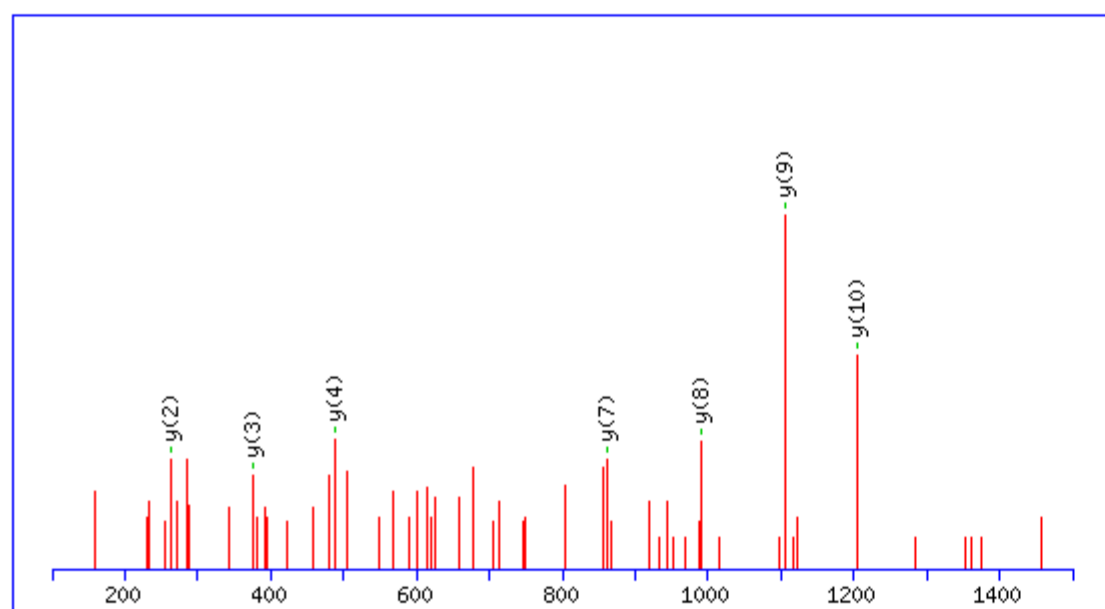

Monoisotopic mass of neutral peptide Mr(calc): 1388.755112

Fixed modifications: Propionamide (C) (apply to specified residues or termini only)

Ions Score: 46 Expect: 0.00025

Matches : 7/124 fragment ions using 13 most intense peaks ([help](#))

| #  | b           | b <sup>++</sup> | b*          | b <sup>+++</sup> | b <sup>0</sup> | b <sup>0++</sup> | Seq. | y                  | y <sup>++</sup> | y*          | y <sup>+++</sup> | y <sup>0</sup> | y <sup>0++</sup> | #  |
|----|-------------|-----------------|-------------|------------------|----------------|------------------|------|--------------------|-----------------|-------------|------------------|----------------|------------------|----|
| 1  | 115.050203  | 58.028740       | 98.023654   | 49.515465        |                |                  | N    |                    |                 |             |                  |                |                  | 12 |
| 2  | 186.087317  | 93.547296       | 169.060768  | 85.034022        |                |                  | A    | 1275.719481        | 638.363379      | 1258.692932 | 629.850104       | 1257.708916    | 629.358096       | 11 |
| 3  | 285.155731  | 143.081504      | 268.129182  | 134.568229       |                |                  | V    | <b>1204.682367</b> | 602.844822      | 1187.655818 | 594.331547       | 1186.671802    | 593.839539       | 10 |
| 4  | 400.182674  | 200.594975      | 383.156125  | 192.081701       | 382.172109     | 191.589693       | D    | <b>1105.613953</b> | 553.310615      | 1088.587404 | 544.797340       | 1087.603388    | 544.305332       | 9  |
| 5  | 529.225267  | 265.116272      | 512.198718  | 256.602997       | 511.214702     | 256.110989       | E    | <b>990.587010</b>  | 495.797143      | 973.560461  | 487.283868       | 972.576445     | 486.791860       | 8  |
| 6  | 676.293681  | 338.650479      | 659.267132  | 330.137204       | 658.283116     | 329.645196       | F    | <b>861.544417</b>  | 431.275847      | 844.517868  | 422.762572       | 843.533852     | 422.270564       | 7  |
| 7  | 789.377745  | 395.192511      | 772.351196  | 386.679236       | 771.367180     | 386.187228       | L    | 714.476003         | 357.741640      | 697.449454  | 349.228365       | 696.465438     | 348.736357       | 6  |
| 8  | 902.461809  | 451.734543      | 885.435260  | 443.221268       | 884.451244     | 442.729260       | L    | 601.391939         | 301.199608      | 584.365390  | 292.686333       | 583.381374     | 292.194325       | 5  |
| 9  | 1015.545873 | 508.276575      | 998.519324  | 499.763300       | 997.535308     | 499.271292       | L    | <b>488.307875</b>  | 244.657575      | 471.281326  | 236.144301       | 470.297310     | 235.652293       | 4  |
| 10 | 1128.629937 | 564.818606      | 1111.603388 | 556.305332       | 1110.619372    | 555.813324       | L    | <b>375.223811</b>  | 188.115543      | 358.197262  | 179.602269       | 357.213246     | 179.110261       | 3  |
| 11 | 1243.656880 | 622.332078      | 1226.630331 | 613.818804       | 1225.646315    | 613.326796       | D    | <b>262.139747</b>  | 131.573512      | 245.113198  | 123.060237       | 244.129182     | 122.568229       | 2  |
| 12 |             |                 |             |                  |                |                  | K    | 147.112804         | 74.060040       | 130.086255  | 65.546765        |                |                  | 1  |

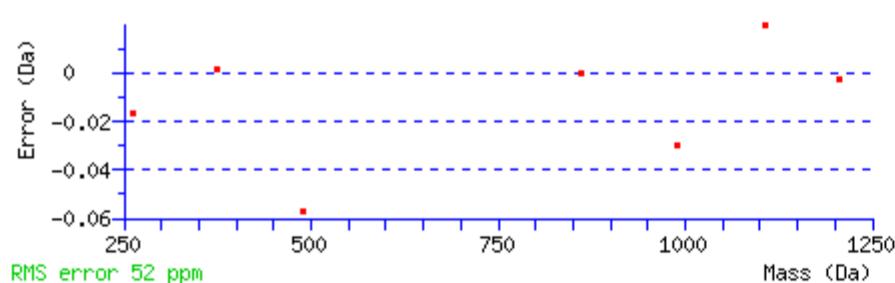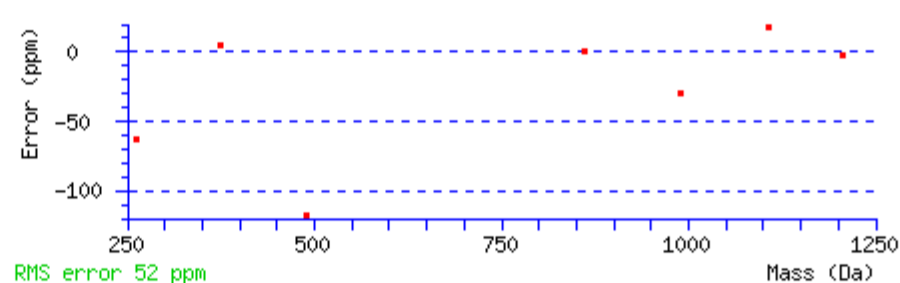

NCBI BLAST search of [NAVDEFLLLLDK](#)

(Parameters: blastp, nr protein database, expect=20000, no filter, PAM30)

Other BLAST [web gateways](#)

All matches to this query

| Score | Mr(calc):   | Delta    | Sequence                     |
|-------|-------------|----------|------------------------------|
| 45.5  | 1388.755112 | 0.005216 | <a href="#">NAVDEFLLLLDK</a> |

Mascot: <http://www.matrixscience.com/>

**Peptide View**

MS/MS Fragmentation of **DDDKNNDGYIDYAEFAK**  
 Found in **MCFD2\_HUMAN**, Multiple coagulation factor deficiency protein 2 OS=Homo sapiens GN=MCFD2 PE=1 SV=1

Match to Query 56158: 1991.834262 from(664.952030,3+) rtinseconds(2689) index(31524)  
 Title: Locus:1.1.1.2609.36  
 Data file 2011-11-12 - TFD - EP 5-5.mgf

Click mouse within plot area to zoom in by factor of two about that point  
 Or, Plot from  to  Da   
 Label all possible matches  Label matches used for scoring

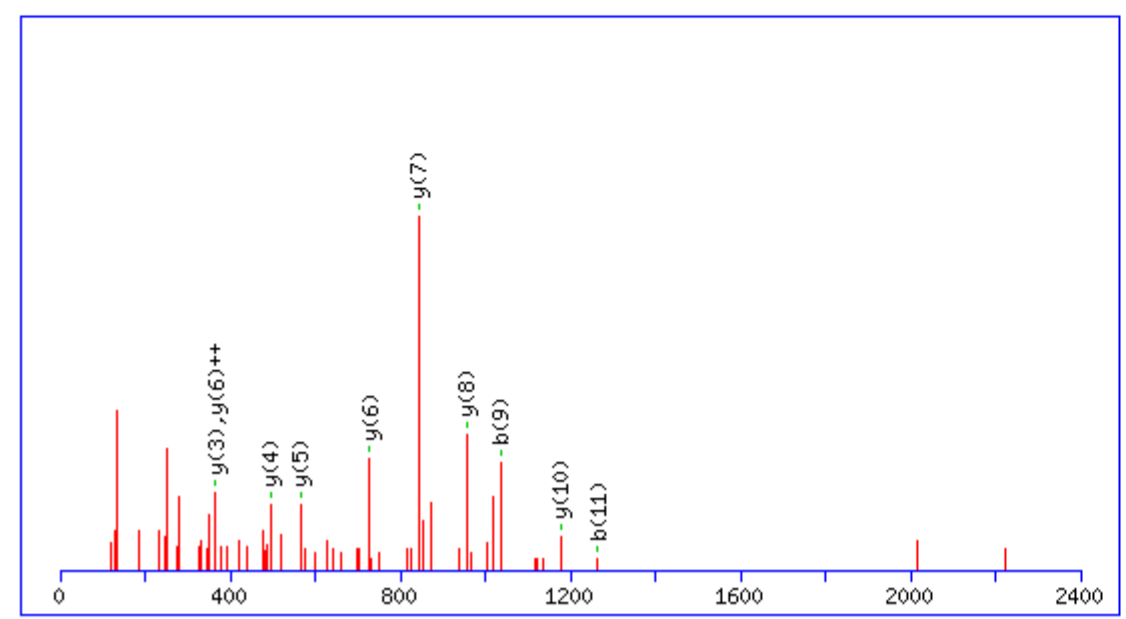

Monoisotopic mass of neutral peptide Mr(calcd): 1991.838455  
 Fixed modifications: Propionamide (C) (apply to specified residues or termini only)  
 Ions Score: 51 Expect: 1.5e-005  
 Matches : 10/180 fragment ions using 12 most intense peaks [\(help\)](#)

| #  | b                  | b <sup>++</sup> | b <sup>*</sup> | b <sup>*++</sup> | b <sup>0</sup> | b <sup>0++</sup> | Seq. | y                  | y <sup>++</sup>   | y <sup>*</sup> | y <sup>*++</sup> | y <sup>0</sup> | y <sup>0++</sup> | #  |
|----|--------------------|-----------------|----------------|------------------|----------------|------------------|------|--------------------|-------------------|----------------|------------------|----------------|------------------|----|
| 1  | 116.034219         | 58.520748       |                |                  | 98.023654      | 49.515465        | D    |                    |                   |                |                  |                |                  | 17 |
| 2  | 231.061162         | 116.034219      |                |                  | 213.050597     | 107.028936       | D    | 1877.818814        | 939.413045        | 1860.792265    | 930.899771       | 1859.808249    | 930.407763       | 16 |
| 3  | 346.088105         | 173.547690      |                |                  | 328.077540     | 164.542408       | D    | 1762.791871        | 881.899574        | 1745.765322    | 873.386299       | 1744.781306    | 872.894291       | 15 |
| 4  | 474.183068         | 237.595172      | 457.156519     | 229.081898       | 456.172503     | 228.589890       | K    | 1647.764928        | 824.386102        | 1630.738379    | 815.872828       | 1629.754363    | 815.380820       | 14 |
| 5  | 588.225995         | 294.616636      | 571.199446     | 286.103361       | 570.215430     | 285.611353       | N    | 1519.669965        | 760.338621        | 1502.643416    | 751.825346       | 1501.659400    | 751.333338       | 13 |
| 6  | 702.268922         | 351.638099      | 685.242373     | 343.124824       | 684.258357     | 342.632816       | N    | 1405.627038        | 703.317157        | 1388.600489    | 694.803883       | 1387.616473    | 694.311875       | 12 |
| 7  | 817.295865         | 409.151570      | 800.269316     | 400.638296       | 799.285300     | 400.146288       | D    | 1291.584111        | 646.295694        | 1274.557562    | 637.782419       | 1273.573546    | 637.290411       | 11 |
| 8  | 874.317329         | 437.662303      | 857.290780     | 429.149028       | 856.306764     | 428.657020       | G    | <b>1176.557168</b> | 588.782222        | 1159.530619    | 580.268948       | 1158.546603    | 579.776940       | 10 |
| 9  | <b>1037.380658</b> | 519.193967      | 1020.354109    | 510.680693       | 1019.370093    | 510.188685       | Y    | 1119.535704        | 560.271490        | 1102.509155    | 551.758216       | 1101.525139    | 551.266208       | 9  |
| 10 | 1150.464722        | 575.735999      | 1133.438173    | 567.222725       | 1132.454157    | 566.730716       | I    | <b>956.472375</b>  | 478.739826        | 939.445826     | 470.226551       | 938.461810     | 469.734543       | 8  |
| 11 | <b>1265.491665</b> | 633.249471      | 1248.465116    | 624.736196       | 1247.481100    | 624.244188       | D    | <b>843.388311</b>  | 422.197794        | 826.361762     | 413.684519       | 825.377746     | 413.192511       | 7  |
| 12 | 1428.554994        | 714.781135      | 1411.528445    | 706.267861       | 1410.544429    | 705.775853       | Y    | <b>728.361368</b>  | <b>364.684322</b> | 711.334819     | 356.171048       | 710.350803     | 355.679040       | 6  |
| 13 | 1499.592108        | 750.299692      | 1482.565559    | 741.786418       | 1481.581543    | 741.294410       | A    | <b>565.298039</b>  | 283.152658        | 548.271490     | 274.639383       | 547.287474     | 274.147375       | 5  |
| 14 | 1628.634701        | 814.820989      | 1611.608152    | 806.307714       | 1610.624136    | 805.815706       | E    | <b>494.260925</b>  | 247.634101        | 477.234376     | 239.120826       | 476.250360     | 238.628818       | 4  |
| 15 | 1775.703115        | 888.355196      | 1758.676566    | 879.841921       | 1757.692550    | 879.349913       | F    | <b>365.218332</b>  | 183.112804        | 348.191783     | 174.599530       |                |                  | 3  |
| 16 | 1846.740229        | 923.873753      | 1829.713680    | 915.360478       | 1828.729664    | 914.868470       | A    | 218.149918         | 109.578597        | 201.123369     | 101.065322       |                |                  | 2  |
| 17 |                    |                 |                |                  |                |                  | K    | 147.112804         | 74.060040         | 130.086255     | 65.546765        |                |                  | 1  |

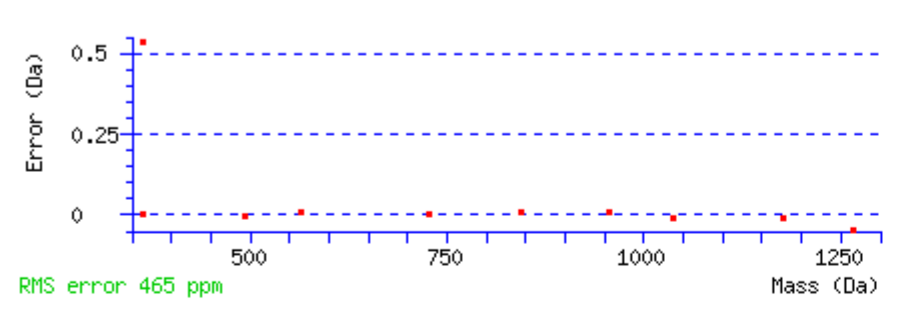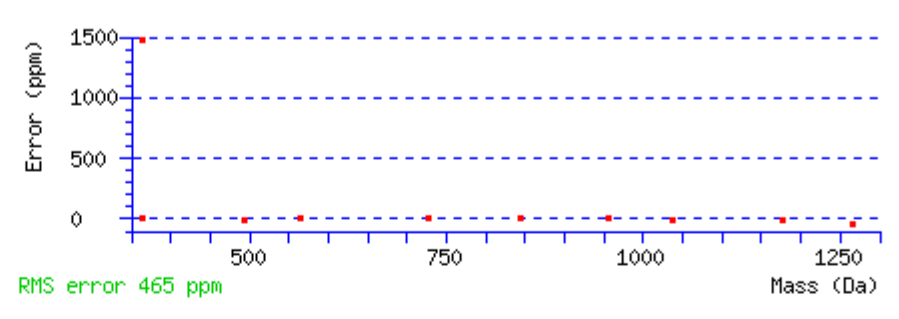

NCBI BLAST search of [DDDKNNDGYIDYAEFAK](#)  
 (Parameters: blastp, nr protein database, expect=20000, no filter, PAM30)  
 Other BLAST [web gateways](#)

**All matches to this query**

| Score | Mr(calcd):  | Delta     | Sequence                          |
|-------|-------------|-----------|-----------------------------------|
| 50.8  | 1991.838455 | -0.004193 | <a href="#">DDDKNNDGYIDYAEFAK</a> |

# **MATRIX** SCIENCE Mascot Search Results

## Peptide View

MS/MS Fragmentation of **LDDFWSLK**

Found in **MKLN1\_HUMAN**, Muskelein OS=Homo sapiens GN=MKLN1 PE=1 SV=2

Match to Query 16934: 1022.509928 from(512.262240,2+) rtinseconds(1963) index(16309)

Title: Locus:1.1.1.2155.20

Data file 2011-11-10 - TFD - EP 3-7.mgf

Click mouse within plot area to zoom in by factor of two about that point

Or, Plot from  to  Da

Label all possible matches  Label matches used for scoring

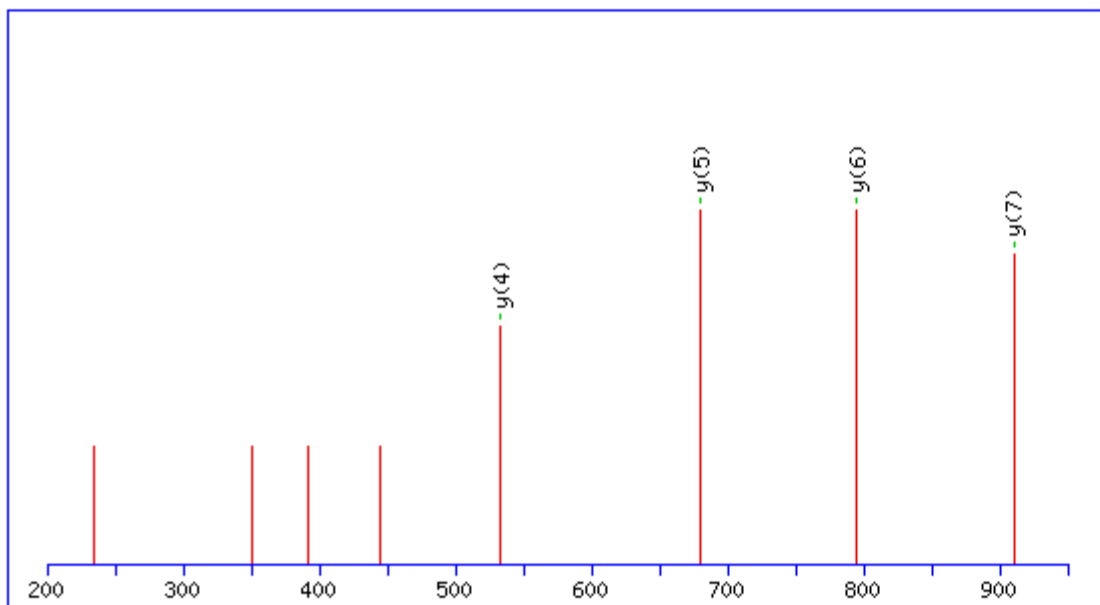

Monoisotopic mass of neutral peptide Mr(calc): 1022.507294

Fixed modifications: Propionamide (C) (apply to specified residues or termini only)

Ions Score: 31 Expect: 0.0046

Matches : 4/64 fragment ions using 6 most intense peaks [\(help\)](#)

| # | b          | b <sup>++</sup> | b <sup>0</sup> | b <sup>0++</sup> | Seq. | y          | y <sup>++</sup> | y <sup>*</sup> | y <sup>*++</sup> | y <sup>0</sup> | y <sup>0++</sup> | # |
|---|------------|-----------------|----------------|------------------|------|------------|-----------------|----------------|------------------|----------------|------------------|---|
| 1 | 114.091340 | 57.549308       |                |                  | L    |            |                 |                |                  |                |                  | 8 |
| 2 | 229.118283 | 115.062779      | 211.107718     | 106.057497       | D    | 910.430509 | 455.718893      | 893.403960     | 447.205618       | 892.419944     | 446.713610       | 7 |
| 3 | 344.145226 | 172.576251      | 326.134661     | 163.570968       | D    | 795.403566 | 398.205421      | 778.377017     | 389.692147       | 777.393001     | 389.200139       | 6 |
| 4 | 491.213640 | 246.110458      | 473.203075     | 237.105176       | F    | 680.376623 | 340.691950      | 663.350074     | 332.178675       | 662.366058     | 331.686667       | 5 |
| 5 | 677.292953 | 339.150115      | 659.282388     | 330.144832       | W    | 533.308209 | 267.157743      | 516.281660     | 258.644468       | 515.297644     | 258.152460       | 4 |
| 6 | 764.324981 | 382.666129      | 746.314416     | 373.660846       | S    | 347.228896 | 174.118086      | 330.202347     | 165.604811       | 329.218331     | 165.112803       | 3 |
| 7 | 877.409045 | 439.208161      | 859.398480     | 430.202878       | L    | 260.196868 | 130.602072      | 243.170319     | 122.088798       |                |                  | 2 |
| 8 |            |                 |                |                  | K    | 147.112804 | 74.060040       | 130.086255     | 65.546765        |                |                  | 1 |

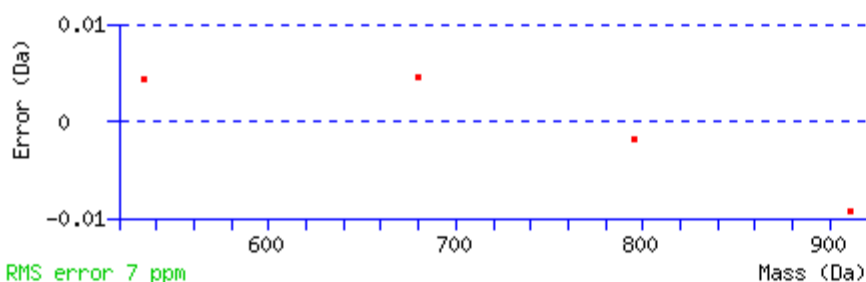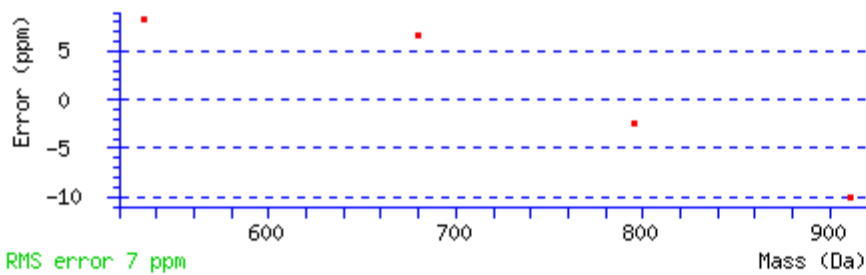

NCBI BLAST search of **LDDFWSLK**

(Parameters: blastp, nr protein database, expect=20000, no filter, PAM30)

Other BLAST [web gateways](#)

## All matches to this query

| Score | Mr(calc):   | Delta     | Sequence                 |
|-------|-------------|-----------|--------------------------|
| 30.5  | 1022.507294 | 0.002634  | <a href="#">LDDFWSLK</a> |
| 5.4   | 1022.514008 | -0.004080 | <a href="#">LMVEMEKK</a> |
| 2.8   | 1022.507294 | 0.002634  | <a href="#">EVVYWSPK</a> |
| 2.5   | 1022.503265 | 0.006663  | <a href="#">IYDVEQTR</a> |

# **MASCOT** Mascot Search Results

## Peptide View

MS/MS Fragmentation of **QDGF<sup>+</sup>TYR**

Found in **MAL\_HUMAN**, Myelin and lymphocyte protein OS=Homo sapiens GN=MAL PE=2 SV=1

Match to Query 109438: 885.400448 from(443.707500,2+) rtinseconds(1505) index(667941)

Title: Locus:1.1.1.1239.8

Data file C:\Program Files (x86)\Matrix Science\Mascot Daemon\mgf3 TFD - Epitel - R2\mascot\_daemon\_merge.mgf

Click mouse within plot area to zoom in by factor of two about that point

Or, Plot from  to  Da

Label all possible matches  Label matches used for scoring

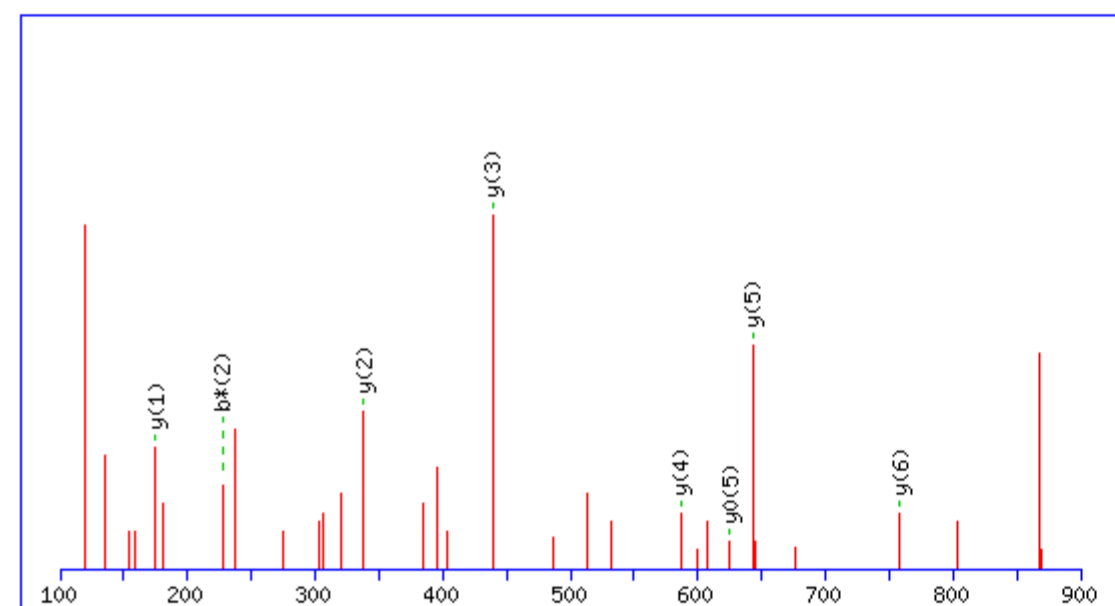

Monoisotopic mass of neutral peptide Mr(calc): 885.398087

Fixed modifications: Carbamidomethyl (C) (apply to specified residues or termini only)

Ions Score: 44 Expect: 0.00023

Matches : 8/66 fragment ions using 16 most intense peaks [\(help\)](#)

| # | b          | b <sup>++</sup> | b <sup>*</sup> | b <sup>*++</sup> | b <sup>0</sup> | b <sup>0++</sup> | Seq. | y          | y <sup>++</sup> | y <sup>*</sup> | y <sup>*++</sup> | y <sup>0</sup> | y <sup>0++</sup> | # |
|---|------------|-----------------|----------------|------------------|----------------|------------------|------|------------|-----------------|----------------|------------------|----------------|------------------|---|
| 1 | 129.065854 | 65.036565       | 112.039305     | 56.523291        |                |                  | Q    |            |                 |                |                  |                |                  | 7 |
| 2 | 244.092797 | 122.550037      | 227.066248     | 114.036762       | 226.082232     | 113.544754       | D    | 758.346781 | 379.677029      | 741.320232     | 371.163754       | 740.336216     | 370.671746       | 6 |
| 3 | 301.114261 | 151.060768      | 284.087712     | 142.547494       | 283.103696     | 142.055486       | G    | 643.319838 | 322.163557      | 626.293289     | 313.650283       | 625.309273     | 313.158275       | 5 |
| 4 | 448.182675 | 224.594975      | 431.156126     | 216.081701       | 430.172110     | 215.589693       | F    | 586.298374 | 293.652825      | 569.271825     | 285.139551       | 568.287809     | 284.647543       | 4 |
| 5 | 549.230354 | 275.118815      | 532.203805     | 266.605541       | 531.219789     | 266.113533       | T    | 439.229960 | 220.118618      | 422.203411     | 211.605344       | 421.219395     | 211.113336       | 3 |
| 6 | 712.293683 | 356.650480      | 695.267134     | 348.137205       | 694.283118     | 347.645197       | Y    | 338.182281 | 169.594778      | 321.155732     | 161.081504       |                |                  | 2 |
| 7 |            |                 |                |                  |                |                  | R    | 175.118952 | 88.063114       | 158.092403     | 79.549839        |                |                  | 1 |

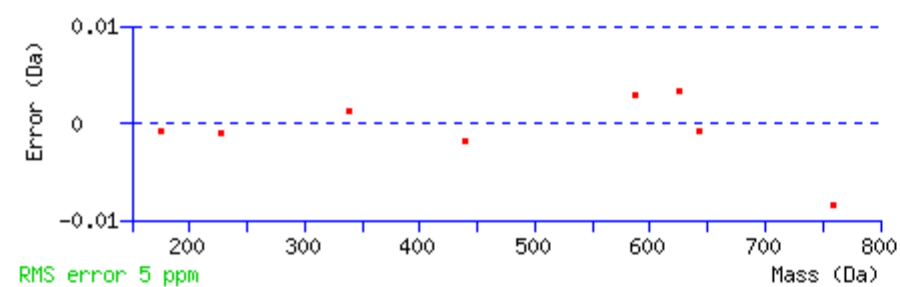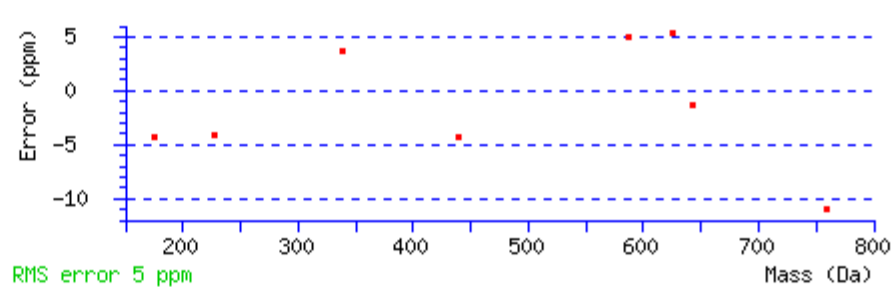

NCBI BLAST search of **QDGF<sup>+</sup>TYR**

(Parameters: blastp, nr protein database, expect=20000, no filter, PAM30)

Other BLAST [web gateways](#)

All matches to this query

| Score | Mr(calc):  | Delta     | Sequence                            |
|-------|------------|-----------|-------------------------------------|
| 44.2  | 885.398087 | 0.002361  | <a href="#">QDGF<sup>+</sup>TYR</a> |
| 12.4  | 885.408844 | -0.008396 | <a href="#">KCFLTAM</a>             |
| 6.2   | 885.398056 | 0.002392  | <a href="#">YQAEGYR</a>             |
| 4.4   | 885.394043 | 0.006405  | <a href="#">EPAGENGGR</a>           |
| 3.5   | 885.394058 | 0.006390  | <a href="#">SSSHSPPR</a>            |
| 3.3   | 885.401443 | -0.000995 | <a href="#">QEMPPPR</a>             |
| 3.3   | 885.401443 | -0.000995 | <a href="#">QEMPPPR</a>             |
| 2.8   | 885.394043 | 0.006405  | <a href="#">NEPNPQR</a>             |
| 2.5   | 885.401443 | -0.000995 | <a href="#">QEMPPPR</a>             |
| 2.5   | 885.401443 | -0.000995 | <a href="#">QEMPPPR</a>             |

Mascot: <http://www.matrixscience.com/>

# Mascot Search Results

## Peptide View

MS/MS Fragmentation of **NPPDVDGVIGEIR**

Found in **MPZL2\_HUMAN**, Myelin protein zero-like protein 2 OS=Homo sapiens GN=MPZL2 PE=1 SV=1

Match to Query 40189: 1379.696328 from(690.855440,2+) rtinseconds(2847) index(37072)

Title: Locus:1.1.1.2398.41

Data file 2011-11-10 - TFD - EP 4-5.mgf

Click mouse within plot area to zoom in by factor of two about that point

Or, Plot from  to  Da

Label all possible matches  Label matches used for scoring

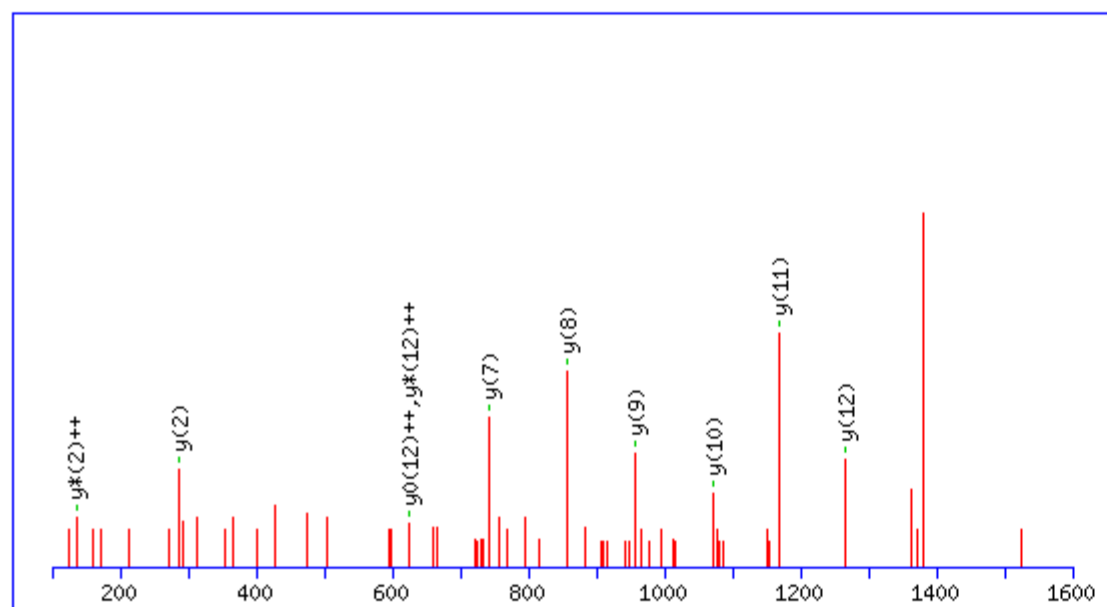

Monoisotopic mass of neutral peptide Mr(calc): 1379.704498

Fixed modifications: Propionamide (C) (apply to specified residues or termini only)

Ions Score: 57 Expect: 2.2e-005

Matches : 10/134 fragment ions using 13 most intense peaks ([help](#))

| #  | b           | b <sup>++</sup> | b <sup>*</sup> | b <sup>*++</sup> | b <sup>0</sup> | b <sup>0++</sup> | Seq. | y                  | y <sup>++</sup> | y <sup>*</sup> | y <sup>*++</sup>  | y <sup>0</sup> | y <sup>0++</sup>  | #  |
|----|-------------|-----------------|----------------|------------------|----------------|------------------|------|--------------------|-----------------|----------------|-------------------|----------------|-------------------|----|
| 1  | 115.050203  | 58.028740       | 98.023654      | 49.515465        |                |                  | N    |                    |                 |                |                   |                |                   | 13 |
| 2  | 212.102967  | 106.555121      | 195.076418     | 98.041847        |                |                  | P    | <b>1266.668843</b> | 633.838059      | 1249.642294    | <b>625.324785</b> | 1248.658278    | <b>624.832777</b> | 12 |
| 3  | 309.155731  | 155.081504      | 292.129182     | 146.568229       |                |                  | P    | <b>1169.616079</b> | 585.311677      | 1152.589530    | 576.798403        | 1151.605514    | 576.306395        | 11 |
| 4  | 424.182674  | 212.594975      | 407.156125     | 204.081701       | 406.172109     | 203.589693       | D    | <b>1072.563315</b> | 536.785295      | 1055.536766    | 528.272021        | 1054.552750    | 527.780013        | 10 |
| 5  | 523.251088  | 262.129182      | 506.224539     | 253.615908       | 505.240523     | 253.123900       | V    | <b>957.536372</b>  | 479.271824      | 940.509823     | 470.758549        | 939.525807     | 470.266541        | 9  |
| 6  | 638.278031  | 319.642654      | 621.251482     | 311.129379       | 620.267466     | 310.637371       | D    | <b>858.467958</b>  | 429.737617      | 841.441409     | 421.224342        | 840.457393     | 420.732334        | 8  |
| 7  | 695.299495  | 348.153386      | 678.272946     | 339.640111       | 677.288930     | 339.148103       | G    | <b>743.441015</b>  | 372.224145      | 726.414466     | 363.710871        | 725.430450     | 363.218863        | 7  |
| 8  | 794.367909  | 397.687593      | 777.341360     | 389.174318       | 776.357344     | 388.682310       | V    | 686.419551         | 343.713413      | 669.393002     | 335.200139        | 668.408986     | 334.708131        | 6  |
| 9  | 907.451973  | 454.229625      | 890.425424     | 445.716350       | 889.441408     | 445.224342       | I    | 587.351137         | 294.179206      | 570.324588     | 285.665932        | 569.340572     | 285.173924        | 5  |
| 10 | 964.473437  | 482.740357      | 947.446888     | 474.227082       | 946.462872     | 473.735074       | G    | 474.267073         | 237.637174      | 457.240524     | 229.123900        | 456.256508     | 228.631892        | 4  |
| 11 | 1093.516030 | 547.261653      | 1076.489481    | 538.748379       | 1075.505465    | 538.256371       | E    | 417.245609         | 209.126442      | 400.219060     | 200.613168        | 399.235044     | 200.121160        | 3  |
| 12 | 1206.600094 | 603.803685      | 1189.573545    | 595.290411       | 1188.589529    | 594.798402       | I    | <b>288.203016</b>  | 144.605146      | 271.176467     | <b>136.091871</b> |                |                   | 2  |
| 13 |             |                 |                |                  |                |                  | R    | 175.118952         | 88.063114       | 158.092403     | 79.549839         |                |                   | 1  |

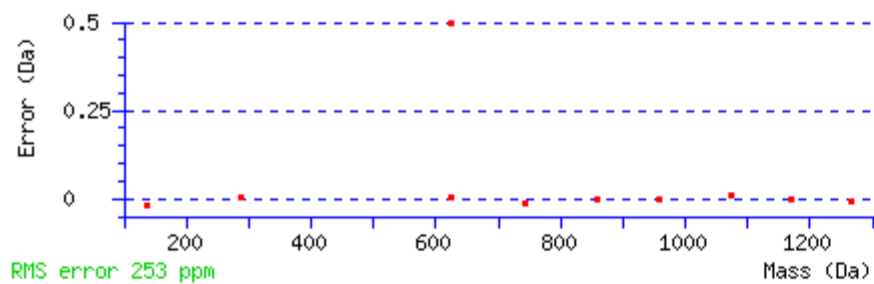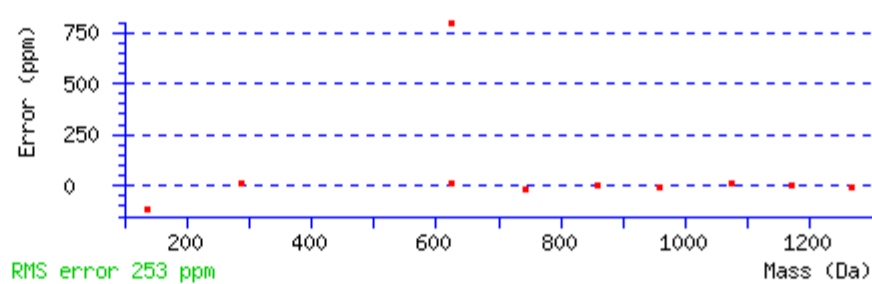

NCBI BLAST search of **NPPDVDGVIGEIR**

(Parameters: blastp, nr protein database, expect=20000, no filter, PAM30)

Other BLAST [web gateways](#)

All matches to this query

| Score | Mr(calc):   | Delta     | Sequence                      |
|-------|-------------|-----------|-------------------------------|
| 57.4  | 1379.704498 | -0.008170 | <a href="#">NPPDVDGVIGEIR</a> |

Mascot: <http://www.matrixscience.com/>

# MASCOT Search Results

## Peptide View

MS/MS Fragmentation of **LAIQGPEDSPSR**

Found in **MLF2\_HUMAN**, Myeloid leukemia factor 2 OS=Homo sapiens GN=MLF2 PE=1 SV=1

Match to Query 33121: 1268.631588 from(635.323070,2+) rtinseconds(1693) index(12606)

Title: Locus:1.1.1.2230.40

Data file 2011-11-12 - TFD - EP 5-5.mgf

Click mouse within plot area to zoom in by factor of two about that point

Or, Plot from  to  Da

Label all possible matches  Label matches used for scoring

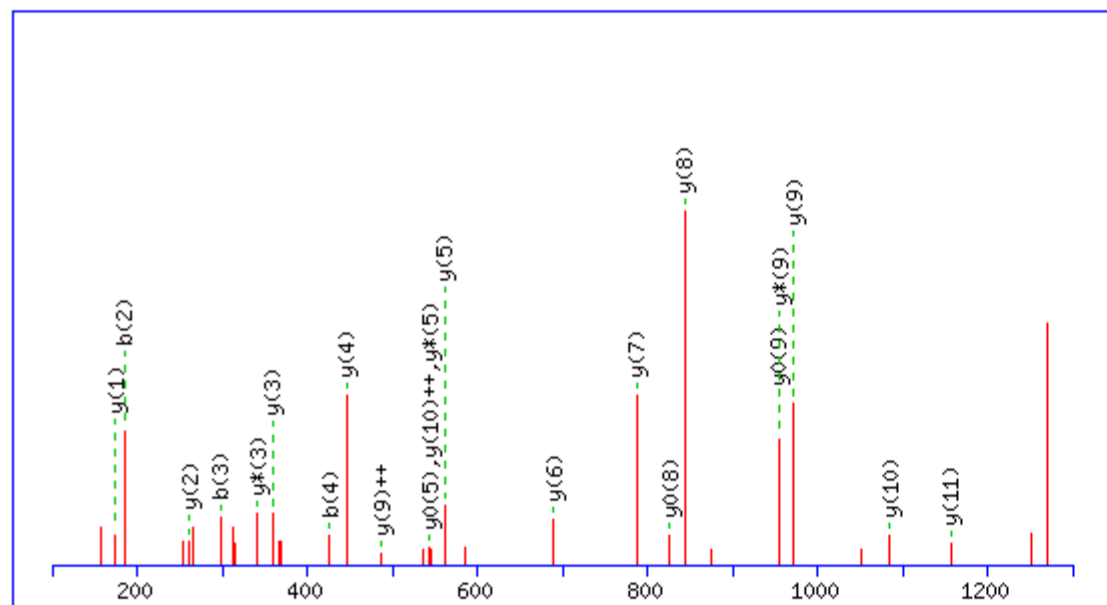

Monoisotopic mass of neutral peptide Mr(calc): 1268.636063

Fixed modifications: Propionamide (C) (apply to specified residues or termini only)

Ions Score: 94 Expect: 1.4e-008

Matches : 22/112 fragment ions using 35 most intense peaks ([help](#))

| #  | b                 | b <sup>++</sup> | b*          | b <sup>*++</sup> | b <sup>0</sup> | b <sup>0++</sup> | Seq. | y                  | y <sup>++</sup>   | y*                | y <sup>*++</sup> | y <sup>0</sup>    | y <sup>0++</sup> | #  |
|----|-------------------|-----------------|-------------|------------------|----------------|------------------|------|--------------------|-------------------|-------------------|------------------|-------------------|------------------|----|
| 1  | 114.091340        | 57.549308       |             |                  |                |                  | L    |                    |                   |                   |                  |                   |                  | 12 |
| 2  | <b>185.128454</b> | 93.067865       |             |                  |                |                  | A    | <b>1156.559292</b> | 578.783284        | 1139.532743       | 570.270010       | 1138.548727       | 569.778002       | 11 |
| 3  | <b>298.212518</b> | 149.609897      |             |                  |                |                  | I    | <b>1085.522178</b> | <b>543.264727</b> | 1068.495629       | 534.751453       | 1067.511613       | 534.259444       | 10 |
| 4  | <b>426.271096</b> | 213.639186      | 409.244547  | 205.125912       |                |                  | Q    | <b>972.438114</b>  | <b>486.722695</b> | <b>955.411565</b> | 478.209421       | <b>954.427549</b> | 477.717413       | 9  |
| 5  | 483.292560        | 242.149918      | 466.266011  | 233.636643       |                |                  | G    | <b>844.379536</b>  | 422.693406        | 827.352987        | 414.180132       | <b>826.368971</b> | 413.688124       | 8  |
| 6  | 580.345324        | 290.676300      | 563.318775  | 282.163026       |                |                  | P    | <b>787.358072</b>  | 394.182674        | 770.331523        | 385.669400       | 769.347507        | 385.177392       | 7  |
| 7  | 709.387917        | 355.197597      | 692.361368  | 346.684322       | 691.377352     | 346.192314       | E    | <b>690.305308</b>  | 345.656292        | 673.278759        | 337.143018       | 672.294743        | 336.651010       | 6  |
| 8  | 824.414860        | 412.711068      | 807.388311  | 404.197793       | 806.404295     | 403.705785       | D    | <b>561.262715</b>  | 281.134996        | <b>544.236166</b> | 272.621721       | <b>543.252150</b> | 272.129713       | 5  |
| 9  | 911.446888        | 456.227082      | 894.420339  | 447.713807       | 893.436323     | 447.221799       | S    | <b>446.235772</b>  | 223.621524        | 429.209223        | 215.108250       | 428.225207        | 214.616242       | 4  |
| 10 | 1008.499652       | 504.753464      | 991.473103  | 496.240189       | 990.489087     | 495.748181       | P    | <b>359.203744</b>  | 180.105510        | <b>342.177195</b> | 171.592236       | 341.193179        | 171.100228       | 3  |
| 11 | 1095.531680       | 548.269478      | 1078.505131 | 539.756204       | 1077.521115    | 539.264196       | S    | <b>262.150980</b>  | 131.579128        | 245.124431        | 123.065854       | 244.140415        | 122.573846       | 2  |
| 12 |                   |                 |             |                  |                |                  | R    | <b>175.118952</b>  | 88.063114         | 158.092403        | 79.549839        |                   |                  | 1  |

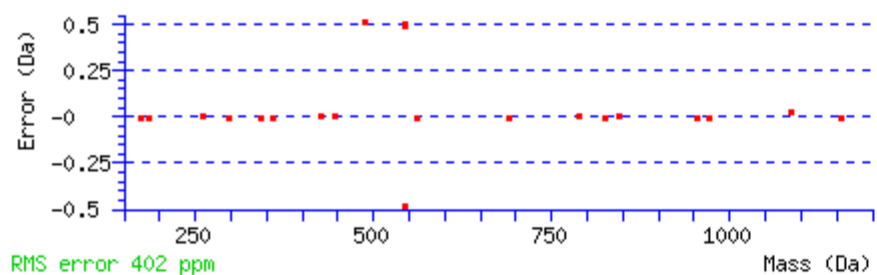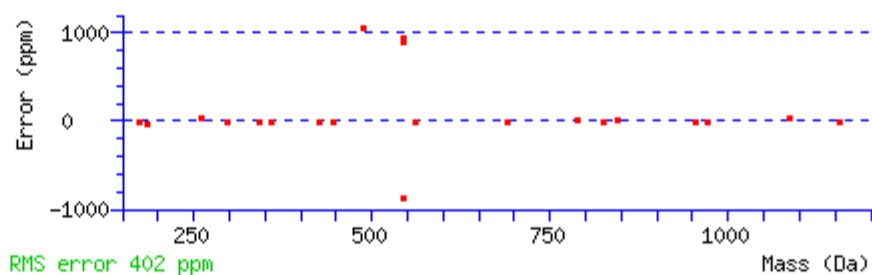

NCBI BLAST search of [LAIQGPEDSPSR](#)

(Parameters: blastp, nr protein database, expect=20000, no filter, PAM30)

Other BLAST [web gateways](#)

## All matches to this query

| Score | Mr(calc):   | Delta     | Sequence                     |
|-------|-------------|-----------|------------------------------|
| 94.4  | 1268.636063 | -0.004475 | <a href="#">LAIQGPEDSPSR</a> |
| 8.2   | 1268.636063 | -0.004475 | <a href="#">ALDKDSPPPSSR</a> |
| 1.9   | 1268.643448 | -0.011860 | <a href="#">LSPSCPDALAPK</a> |
| 0.2   | 1268.633392 | -0.001804 | <a href="#">TGSKPRSGGNHR</a> |

# MASCOT Search Results

## Peptide View

MS/MS Fragmentation of **IIDFGLAR**

Found in **MYLK2\_HUMAN**, Myosin light chain kinase 2, skeletal/cardiac muscle OS=Homo sapiens GN=MYLK2 PE=1 SV=3

Match to Query 4187: 903.514908 from(452.764730,2+) rtinseconds(2733) index(36512)

Title: Locus:1.1.1.1420.3

Data file 2012-01-27 - TFD - Epitel - IEC - 10ul - 2.mgf

Click mouse within plot area to zoom in by factor of two about that point

Or, Plot from  to  Da

Label all possible matches  Label matches used for scoring

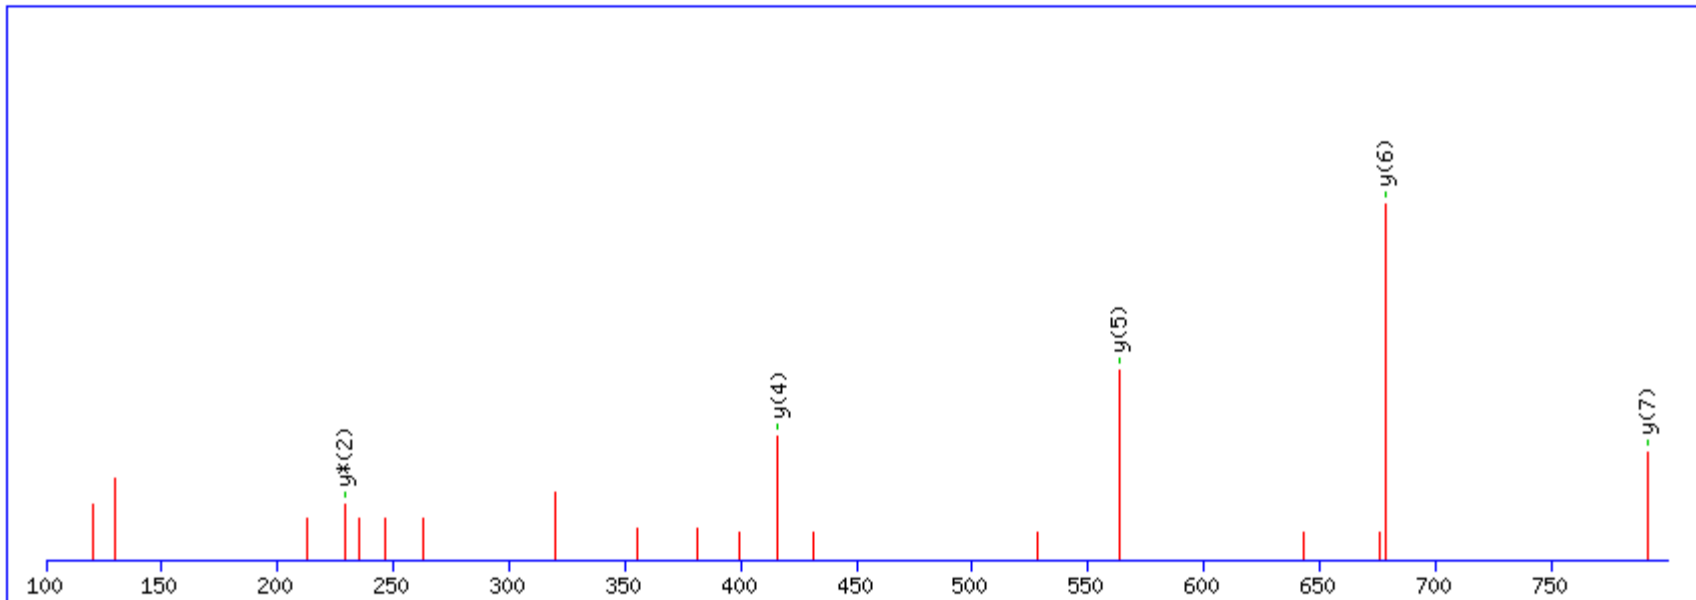

Monoisotopic mass of neutral peptide Mr(calc): 903.517792

Fixed modifications: Carbamidomethyl (C) (apply to specified residues or termini only)

Ions Score: 31 Expect: 0.005

Matches : 5/56 fragment ions using 7 most intense peaks [\(help\)](#)

| # | b          | b <sup>++</sup> | b <sup>0</sup> | b <sup>0++</sup> | Seq. | y                 | y <sup>++</sup> | y <sup>*</sup>    | y <sup>*++</sup> | y <sup>0</sup> | y <sup>0++</sup> | # |
|---|------------|-----------------|----------------|------------------|------|-------------------|-----------------|-------------------|------------------|----------------|------------------|---|
| 1 | 114.091340 | 57.549308       |                |                  | I    |                   |                 |                   |                  |                |                  | 8 |
| 2 | 227.175404 | 114.091340      |                |                  | I    | <b>791.441015</b> | 396.224146      | 774.414466        | 387.710871       | 773.430450     | 387.218863       | 7 |
| 3 | 342.202347 | 171.604811      | 324.191782     | 162.599529       | D    | <b>678.356951</b> | 339.682114      | 661.330402        | 331.168839       | 660.346386     | 330.676831       | 6 |
| 4 | 489.270761 | 245.139018      | 471.260196     | 236.133736       | F    | <b>563.330008</b> | 282.168642      | 546.303459        | 273.655368       |                |                  | 5 |
| 5 | 546.292225 | 273.649751      | 528.281660     | 264.644468       | G    | <b>416.261594</b> | 208.634435      | 399.235045        | 200.121160       |                |                  | 4 |
| 6 | 659.376289 | 330.191783      | 641.365724     | 321.186500       | L    | 359.240130        | 180.123703      | 342.213581        | 171.610428       |                |                  | 3 |
| 7 | 730.413403 | 365.710340      | 712.402838     | 356.705057       | A    | 246.156066        | 123.581671      | <b>229.129517</b> | 115.068396       |                |                  | 2 |
| 8 |            |                 |                |                  | R    | 175.118952        | 88.063114       | 158.092403        | 79.549839        |                |                  | 1 |

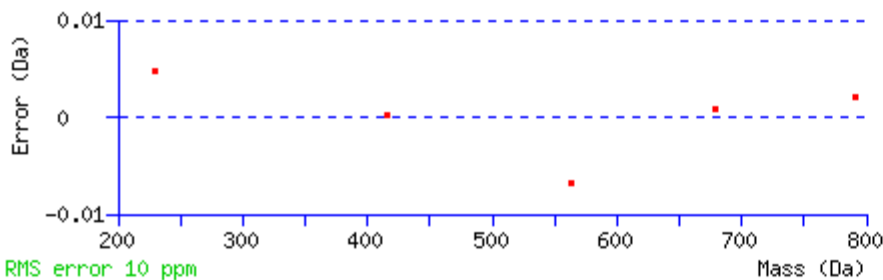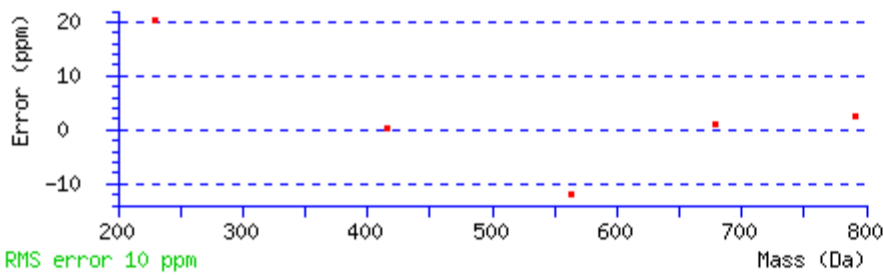

NCBI **BLAST** search of **IIDFGLAR**

(Parameters: blastp, nr protein database, expect=20000, no filter, PAM30)

Other BLAST [web gateways](#)

## All matches to this query

| Score | Mr(calc):  | Delta     | Sequence                  |
|-------|------------|-----------|---------------------------|
| 31.1  | 903.517792 | -0.002884 | <a href="#">IIDFGLAR</a>  |
| 31.1  | 903.517792 | -0.002884 | <a href="#">ILDFGLAR</a>  |
| 31.1  | 903.517792 | -0.002884 | <a href="#">LIDFGLAR</a>  |
| 6.3   | 903.517792 | -0.002884 | <a href="#">IDIRPFK</a>   |
| 5.2   | 903.517807 | -0.002899 | <a href="#">LVSVFPAR</a>  |
| 3.8   | 903.509949 | 0.004959  | <a href="#">VASVLGLVM</a> |
| 3.4   | 903.509918 | 0.004990  | <a href="#">LLTKVAEM</a>  |
| 3.4   | 903.509903 | 0.005005  | <a href="#">IEMSAIK</a>   |
| 3.4   | 903.506561 | 0.008347  | <a href="#">IPAVTYPK</a>  |
| 3.4   | 903.509903 | 0.005005  | <a href="#">LIALEMAK</a>  |



# **MATRIX** SCIENCE Mascot Search Results

## Peptide View

MS/MS Fragmentation of **LEAELEK**

Found in **MYO5C\_HUMAN**, Myosin-Vc OS=Homo sapiens GN=MYO5C PE=1 SV=2

Match to Query 40552: 830.441548 from(416.228050,2+) rtinseconds(1222) index(332762)

Title: Locus:1.1.1.800.4

Data file C:\Program Files (x86)\Matrix Science\Mascot Daemon\mgf3 TFD - Epitel - R2\mascot\_daemon\_merge.mgf

Click mouse within plot area to zoom in by factor of two about that point

Or, Plot from  to  Da

Label all possible matches  Label matches used for scoring

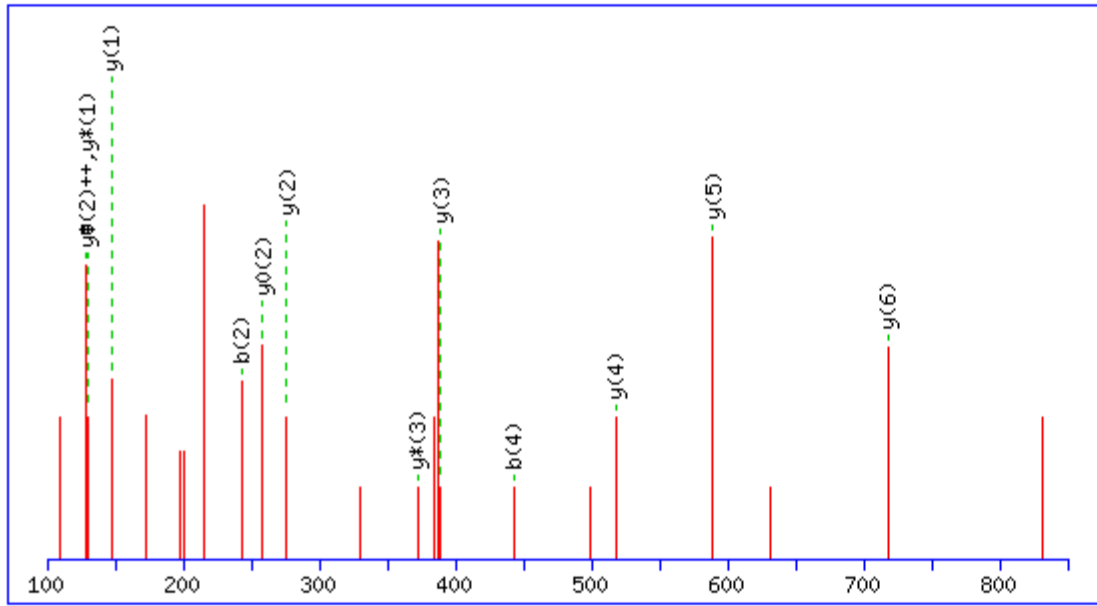

Monoisotopic mass of neutral peptide Mr(calc): 830.438507

Fixed modifications: Carbamidomethyl (C) (apply to specified residues or termini only)

Ions Score: 45 Expect: 0.00072

Matches : 13/56 fragment ions using 20 most intense peaks [\(help\)](#)

| # | b                 | b <sup>++</sup> | b <sup>0</sup> | b <sup>0++</sup> | Seq. | y                 | y <sup>++</sup> | y <sup>*</sup>    | y <sup>*++</sup>  | y <sup>0</sup>    | y <sup>0++</sup>  | # |
|---|-------------------|-----------------|----------------|------------------|------|-------------------|-----------------|-------------------|-------------------|-------------------|-------------------|---|
| 1 | 114.091340        | 57.549308       |                |                  | L    |                   |                 |                   |                   |                   |                   | 7 |
| 2 | <b>243.133933</b> | 122.070605      | 225.123368     | 113.065322       | E    | <b>718.361761</b> | 359.684519      | 701.335212        | 351.171244        | 700.351196        | 350.679236        | 6 |
| 3 | 314.171047        | 157.589161      | 296.160482     | 148.583879       | A    | <b>589.319168</b> | 295.163222      | 572.292619        | 286.649948        | 571.308603        | 286.157940        | 5 |
| 4 | <b>443.213640</b> | 222.110458      | 425.203075     | 213.105176       | E    | <b>518.282054</b> | 259.644665      | 501.255505        | 251.131391        | 500.271489        | 250.639383        | 4 |
| 5 | 556.297704        | 278.652490      | 538.287139     | 269.647208       | L    | <b>389.239461</b> | 195.123369      | <b>372.212912</b> | 186.610094        | 371.228896        | 186.118086        | 3 |
| 6 | 685.340297        | 343.173787      | 667.329732     | 334.168504       | E    | <b>276.155397</b> | 138.581336      | 259.128848        | <b>130.068062</b> | <b>258.144832</b> | <b>129.576054</b> | 2 |
| 7 |                   |                 |                |                  | K    | <b>147.112804</b> | 74.060040       | <b>130.086255</b> | 65.546765         |                   |                   | 1 |

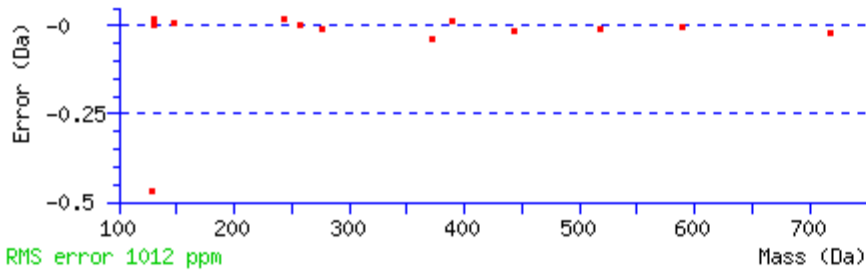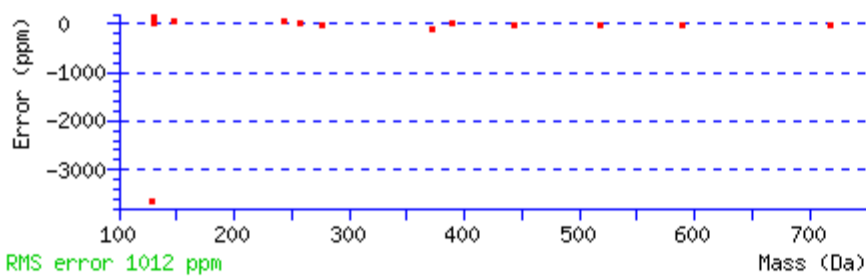

NCBI BLAST search of [LEAELEK](#)

(Parameters: blastp, nr protein database, expect=20000, no filter, PAM30)

Other BLAST [web gateways](#)

## All matches to this query

| Score | Mr(calc):  | Delta     | Sequence                |
|-------|------------|-----------|-------------------------|
| 45.0  | 830.438507 | 0.003041  | <a href="#">LEAELEK</a> |
| 29.1  | 830.438507 | 0.003041  | <a href="#">LEALEEK</a> |
| 28.7  | 830.438507 | 0.003041  | <a href="#">EAELEIK</a> |
| 28.3  | 830.438522 | 0.003026  | <a href="#">SILEPEK</a> |
| 28.3  | 830.438538 | 0.003010  | <a href="#">TVPEIEK</a> |
| 21.7  | 830.438507 | 0.003041  | <a href="#">AEEILEK</a> |
| 21.4  | 830.449753 | -0.008205 | <a href="#">IEEAITR</a> |
| 21.3  | 830.449738 | -0.008190 | <a href="#">ELAENKK</a> |
| 19.6  | 830.449738 | -0.008190 | <a href="#">ELEANKK</a> |
| 19.4  | 830.449738 | -0.008190 | <a href="#">KNAEELK</a> |

# **MASCOT** Mascot Search Results

## Peptide View

MS/MS Fragmentation of **QLDSLRR**

Found in **MTA70\_HUMAN**, N6-adenosine-methyltransferase 70 kDa subunit OS=Homo sapiens GN=METTLL3 PE=1 SV=2

Match to Query 11472: 1015.532048 from(508.773300,2+) rtinseconds(1532) index(13786)

Title: Locus:1.1.1.2070.20

Data file 2011-11-10 - TFD - EP 4-3.mgf

Click mouse within plot area to zoom in by factor of two about that point

Or, Plot from  to  Da

Label all possible matches  Label matches used for scoring

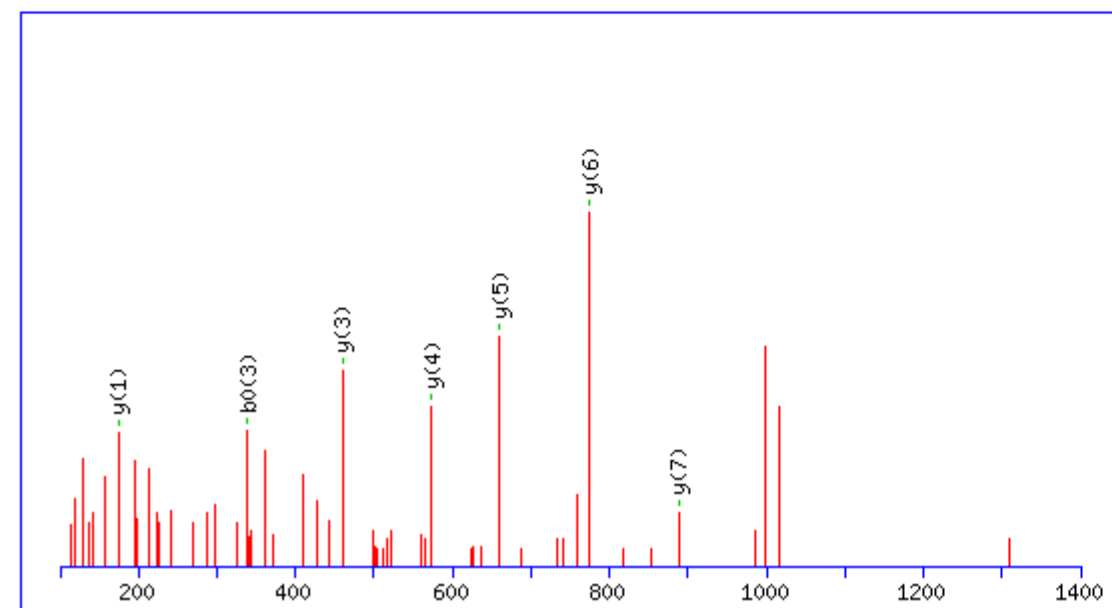

Monoisotopic mass of neutral peptide  $M_r(\text{calc})$ : 1015.541031

Fixed modifications: Propionamide (C) (apply to specified residues or termini only)

Ions Score: 53 Expect:  $9.4e-005$

Matches : 7/78 fragment ions using 9 most intense peaks ([help](#))

| # | b          | b <sup>++</sup> | b*         | b <sup>+++</sup> | b <sup>0</sup>    | b <sup>0++</sup> | Seq. | y                 | y <sup>++</sup> | y*         | y <sup>+++</sup> | y <sup>0</sup> | y <sup>0++</sup> | # |
|---|------------|-----------------|------------|------------------|-------------------|------------------|------|-------------------|-----------------|------------|------------------|----------------|------------------|---|
| 1 | 129.065854 | 65.036565       | 112.039305 | 56.523291        |                   |                  | Q    |                   |                 |            |                  |                |                  | 8 |
| 2 | 242.149918 | 121.578597      | 225.123369 | 113.065323       |                   |                  | L    | <b>888.489755</b> | 444.748516      | 871.463206 | 436.235241       | 870.479190     | 435.743233       | 7 |
| 3 | 357.176861 | 179.092069      | 340.150312 | 170.578794       | <b>339.166296</b> | 170.086786       | D    | <b>775.405691</b> | 388.206484      | 758.379142 | 379.693209       | 757.395126     | 379.201201       | 6 |
| 4 | 444.208889 | 222.608083      | 427.182340 | 214.094808       | 426.198324        | 213.602800       | S    | <b>660.378748</b> | 330.693012      | 643.352199 | 322.179738       | 642.368183     | 321.687730       | 5 |
| 5 | 557.292953 | 279.150115      | 540.266404 | 270.636840       | 539.282388        | 270.144832       | L    | <b>573.346720</b> | 287.176998      | 556.320171 | 278.663724       | 555.336155     | 278.171716       | 4 |
| 6 | 713.394064 | 357.200670      | 696.367515 | 348.687396       | 695.383499        | 348.195388       | R    | <b>460.262656</b> | 230.634966      | 443.236107 | 222.121692       | 442.252091     | 221.629684       | 3 |
| 7 | 842.436657 | 421.721967      | 825.410108 | 413.208692       | 824.426092        | 412.716684       | E    | 304.161545        | 152.584411      | 287.134996 | 144.071136       | 286.150980     | 143.579128       | 2 |
| 8 |            |                 |            |                  |                   |                  | R    | <b>175.118952</b> | 88.063114       | 158.092403 | 79.549840        |                |                  | 1 |

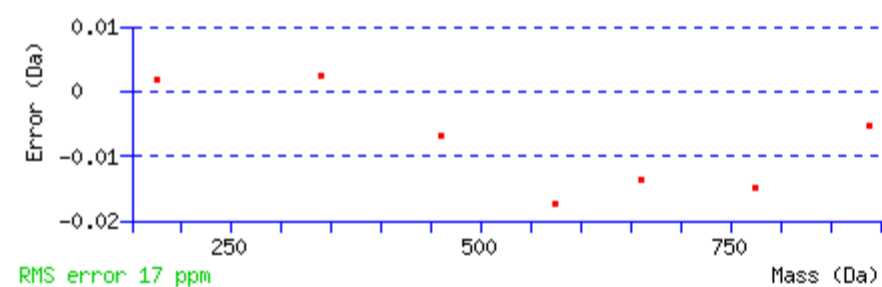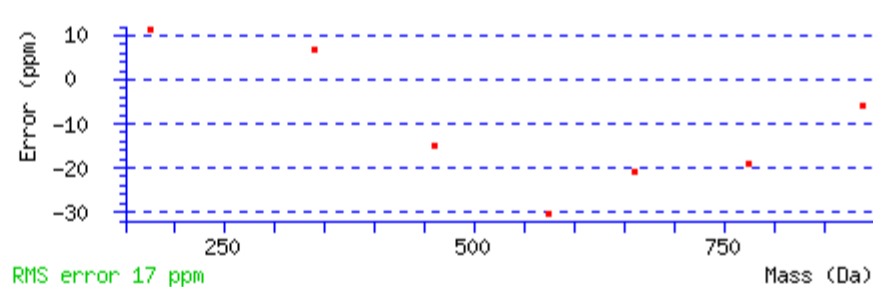

NCBI BLAST search of **QLDSLRR**

(Parameters: blastp, nr protein database, expect=20000, no filter, PAM30)

Other BLAST [web gateways](#)

## All matches to this query

| Score | $M_r(\text{calc})$ : | Delta     | Sequence                   |
|-------|----------------------|-----------|----------------------------|
| 59.0  | 1015.529816          | 0.002232  | <a href="#">QLDSIVGER</a>  |
| 52.5  | 1015.541031          | -0.008983 | <a href="#">QLDSLRR</a>    |
| 16.4  | 1015.529800          | 0.002248  | <a href="#">KLVEGEEGR</a>  |
| 13.2  | 1015.533829          | -0.001781 | <a href="#">QPPEALAFK</a>  |
| 11.4  | 1015.533859          | -0.001811 | <a href="#">GAPDPFLGVK</a> |
| 11.4  | 1015.529800          | 0.002248  | <a href="#">QIDEIRDK</a>   |
| 11.4  | 1015.537216          | -0.005168 | <a href="#">QIDQMVGLI</a>  |
| 11.1  | 1015.541046          | -0.008998 | <a href="#">LQDERTVR</a>   |
| 10.2  | 1015.541046          | -0.008998 | <a href="#">KPRETDVR</a>   |
| 10.2  | 1015.529800          | 0.002248  | <a href="#">QLTEEIQR</a>   |

# **MATRIX** SCIENCE Mascot Search Results

## Peptide View

### MS/MS Fragmentation of **LVEPGSPA EK**

Found in **NHRF1\_HUMAN**, Na(+)/H(+) exchange regulatory cofactor NHE-RF1 OS=Homo sapiens GN=SLC9A3R1 PE=1 SV=4

Match to Query 11261: 1025.538188 from(513.776370,2+) rtinseconds(1030) index(4140)

Title: Locus:1.1.1.838.20

Data file 2012-01-27 - TFD - Epitel - IEC - 10ul - 3.mgf

Click mouse within plot area to zoom in by factor of two about that point

Or, Plot from  to  Da

Label all possible matches  Label matches used for scoring

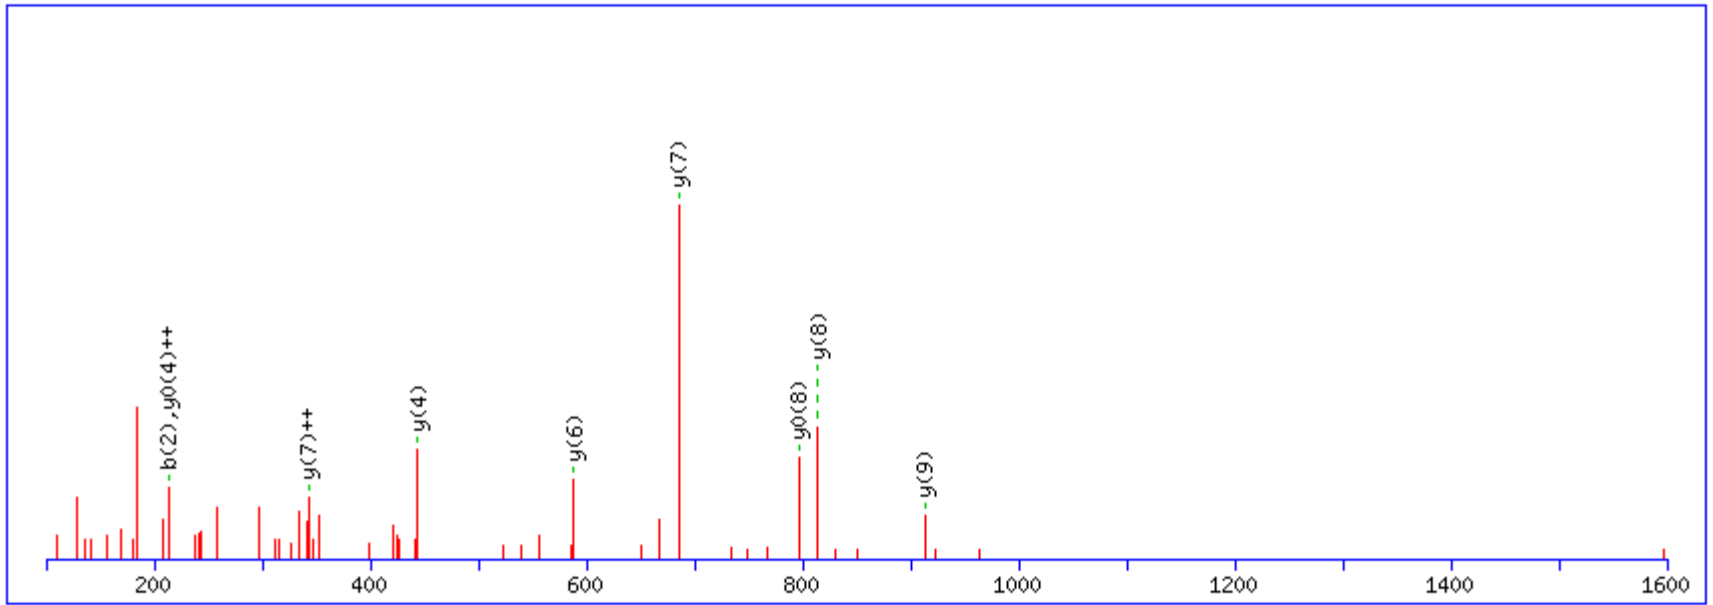

Monoisotopic mass of neutral peptide **Mr(calc): 1025.539307**

Fixed modifications: Carbamidomethyl (C) (apply to specified residues or termini only)

Ions Score: 41 Expect: 0.00033

Matches : 9/84 fragment ions using 9 most intense peaks ([help](#))

| #  | b          | b <sup>++</sup> | b <sup>0</sup> | b <sup>0++</sup> | Seq. | y          | y <sup>++</sup> | y <sup>*</sup> | y <sup>*++</sup> | y <sup>0</sup> | y <sup>0++</sup> | #  |
|----|------------|-----------------|----------------|------------------|------|------------|-----------------|----------------|------------------|----------------|------------------|----|
| 1  | 114.091340 | 57.549308       |                |                  | L    |            |                 |                |                  |                |                  | 10 |
| 2  | 213.159754 | 107.083515      |                |                  | V    | 913.462538 | 457.234907      | 896.435989     | 448.721633       | 895.451973     | 448.229625       | 9  |
| 3  | 342.202347 | 171.604811      | 324.191782     | 162.599529       | E    | 814.394124 | 407.700700      | 797.367575     | 399.187426       | 796.383559     | 398.695418       | 8  |
| 4  | 439.255111 | 220.131193      | 421.244546     | 211.125911       | P    | 685.351531 | 343.179404      | 668.324982     | 334.666129       | 667.340966     | 334.174121       | 7  |
| 5  | 496.276575 | 248.641925      | 478.266010     | 239.636643       | G    | 588.298767 | 294.653022      | 571.272218     | 286.139747       | 570.288202     | 285.647739       | 6  |
| 6  | 583.308603 | 292.157940      | 565.298038     | 283.152657       | S    | 531.277303 | 266.142290      | 514.250754     | 257.629015       | 513.266738     | 257.137007       | 5  |
| 7  | 680.361367 | 340.684322      | 662.350802     | 331.679039       | P    | 444.245275 | 222.626275      | 427.218726     | 214.113001       | 426.234710     | 213.620993       | 4  |
| 8  | 751.398481 | 376.202879      | 733.387916     | 367.197596       | A    | 347.192511 | 174.099893      | 330.165962     | 165.586619       | 329.181946     | 165.094611       | 3  |
| 9  | 880.441074 | 440.724175      | 862.430509     | 431.718893       | E    | 276.155397 | 138.581336      | 259.128848     | 130.068062       | 258.144832     | 129.576054       | 2  |
| 10 |            |                 |                |                  | K    | 147.112804 | 74.060040       | 130.086255     | 65.546765        |                |                  | 1  |

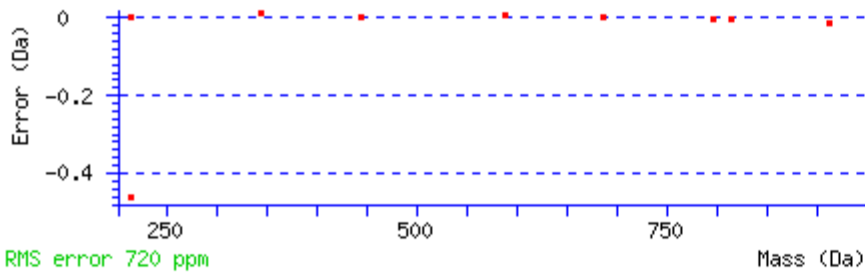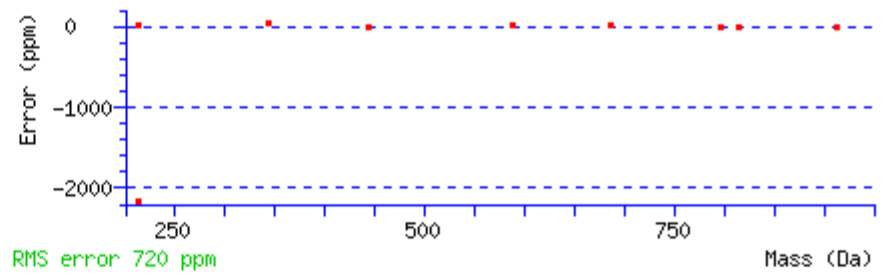

### NCBI BLAST search of **LVEPGSPA EK**

(Parameters: blastp, nr protein database, expect=20000, no filter, PAM30)

Other BLAST [web gateways](#)

### All matches to this query

| Score | Mr(calc):   | Delta     | Sequence                    |
|-------|-------------|-----------|-----------------------------|
| 40.8  | 1025.539307 | -0.001119 | <a href="#">LVEPGSPA EK</a> |
| 3.7   | 1025.543335 | -0.005147 | <a href="#">LVFDEY LK</a>   |

Mascot: <http://www.matrixscience.com/>

# MASCOT SCIENCE Mascot Search Results

## Peptide View

### MS/MS Fragmentation of **VVLASASPR**

Found in **ASML\_HUMAN**, N-acetylserotonin O-methyltransferase-like protein OS=Homo sapiens GN=ASMTL PE=1 SV=3

Match to Query 8822: 898.523728 from(450.269140,2+) rtinseconds(1256) index(8159)

Title: Locus:1.1.1.1911.14

Data file 2011-11-14 - TFD - EP 8-2.mgf

Click mouse within plot area to zoom in by factor of two about that point

Or, Plot from  to  Da

Label all possible matches  Label matches used for scoring

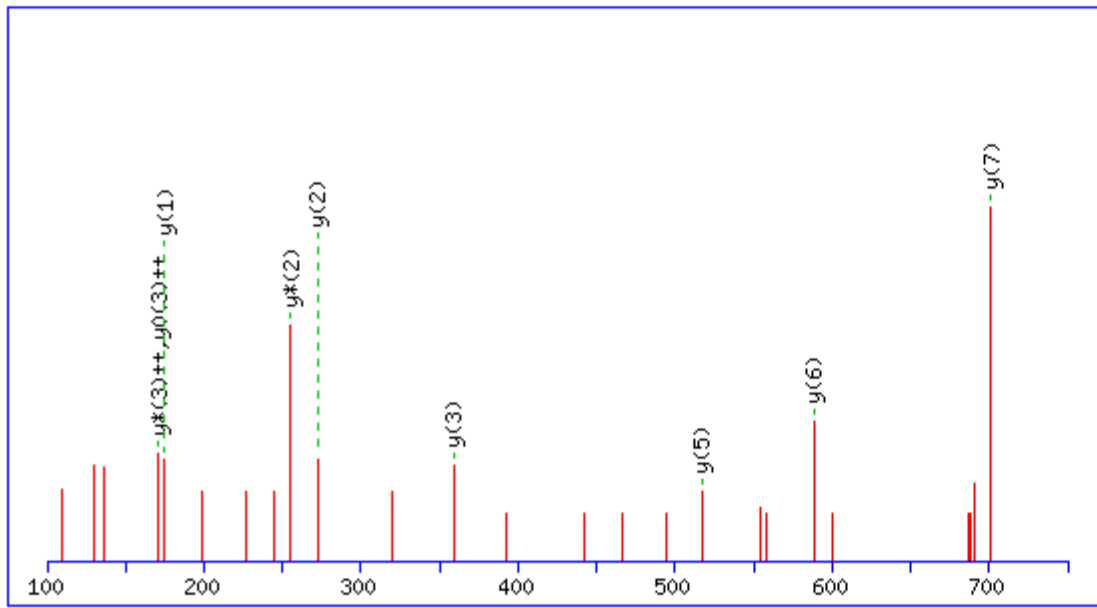

Monoisotopic mass of neutral peptide Mr(calc): 898.523605

Fixed modifications: Propionamide (C) (apply to specified residues or termini only)

Ions Score: 53 Expect: 3.8e-005

Matches : 9/68 fragment ions using 12 most intense peaks ([help](#))

| # | b          | b <sup>++</sup> | b <sup>0</sup> | b <sup>0++</sup> | Seq. | y                 | y <sup>++</sup> | y <sup>*</sup>    | y <sup>*++</sup>  | y <sup>0</sup> | y <sup>0++</sup>  | # |
|---|------------|-----------------|----------------|------------------|------|-------------------|-----------------|-------------------|-------------------|----------------|-------------------|---|
| 1 | 100.075690 | 50.541483       |                |                  | V    |                   |                 |                   |                   |                |                   | 9 |
| 2 | 199.144104 | 100.075690      |                |                  | V    | 800.462478        | 400.734877      | 783.435929        | 392.221603        | 782.451913     | 391.729595        | 8 |
| 3 | 312.228168 | 156.617722      |                |                  | L    | <b>701.394064</b> | 351.200670      | 684.367515        | 342.687395        | 683.383499     | 342.195387        | 7 |
| 4 | 383.265282 | 192.136279      |                |                  | A    | <b>588.310000</b> | 294.658638      | 571.283451        | 286.145363        | 570.299435     | 285.653355        | 6 |
| 5 | 470.297310 | 235.652293      | 452.286745     | 226.647010       | S    | <b>517.272886</b> | 259.140081      | 500.246337        | 250.626806        | 499.262321     | 250.134798        | 5 |
| 6 | 541.334424 | 271.170850      | 523.323859     | 262.165568       | A    | 430.240858        | 215.624067      | 413.214309        | 207.110792        | 412.230293     | 206.618784        | 4 |
| 7 | 628.366452 | 314.686864      | 610.355887     | 305.681581       | S    | <b>359.203744</b> | 180.105510      | 342.177195        | <b>171.592235</b> | 341.193179     | <b>171.100227</b> | 3 |
| 8 | 725.419216 | 363.213246      | 707.408651     | 354.207964       | P    | <b>272.171716</b> | 136.589496      | <b>255.145167</b> | 128.076221        |                |                   | 2 |
| 9 |            |                 |                |                  | R    | <b>175.118952</b> | 88.063114       | 158.092403        | 79.549839         |                |                   | 1 |

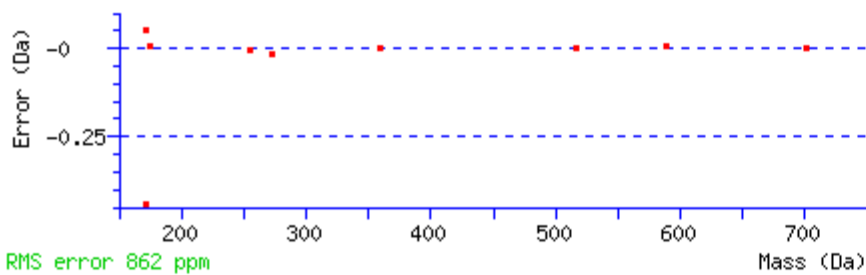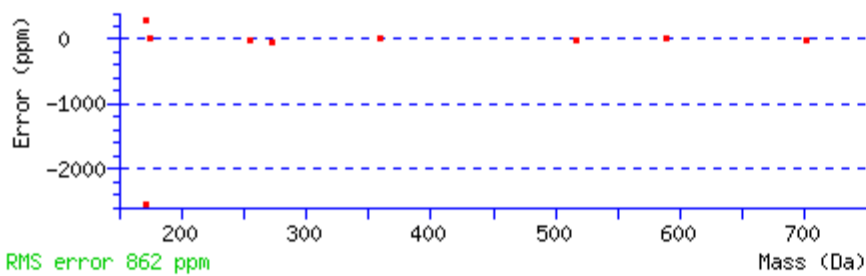

### NCBI BLAST search of **VVLASASPR**

(Parameters: blastp, nr protein database, expect=20000, no filter, PAM30)

Other BLAST [web gateways](#)

### All matches to this query

| Score | Mr(calc):  | Delta    | Sequence                  |
|-------|------------|----------|---------------------------|
| 52.6  | 898.523605 | 0.000123 | <a href="#">VVLASASPR</a> |
| 8.4   | 898.523621 | 0.000107 | <a href="#">VVPEGVKR</a>  |
| 6.0   | 898.523590 | 0.000138 | <a href="#">DQLLAIR</a>   |
| 4.0   | 898.523621 | 0.000107 | <a href="#">SPVKTVPR</a>  |
| 3.5   | 898.523605 | 0.000123 | <a href="#">LVAASVPAR</a> |
| 3.4   | 898.523605 | 0.000123 | <a href="#">VLVGNLER</a>  |
| 2.4   | 898.523605 | 0.000123 | <a href="#">APTLALGTR</a> |

# **MASCOT** Mascot Search Results

## Peptide View

MS/MS Fragmentation of **HIKPVSR**

Found in **ESCO2\_HUMAN**, N-acetyltransferase ESCO2 OS=Homo sapiens GN=ESCO2 PE=1 SV=1

Match to Query 2997: 835.504408 from(418.759480,2+) rtinseconds(1401) index(6057)

Title: Locus:1.1.1.1864.3

Data file 2011-11-12 - TFD - EP 6-7.mgf

Click mouse within plot area to zoom in by factor of two about that point

Or, Plot from  to  Da

Label all possible matches  Label matches used for scoring

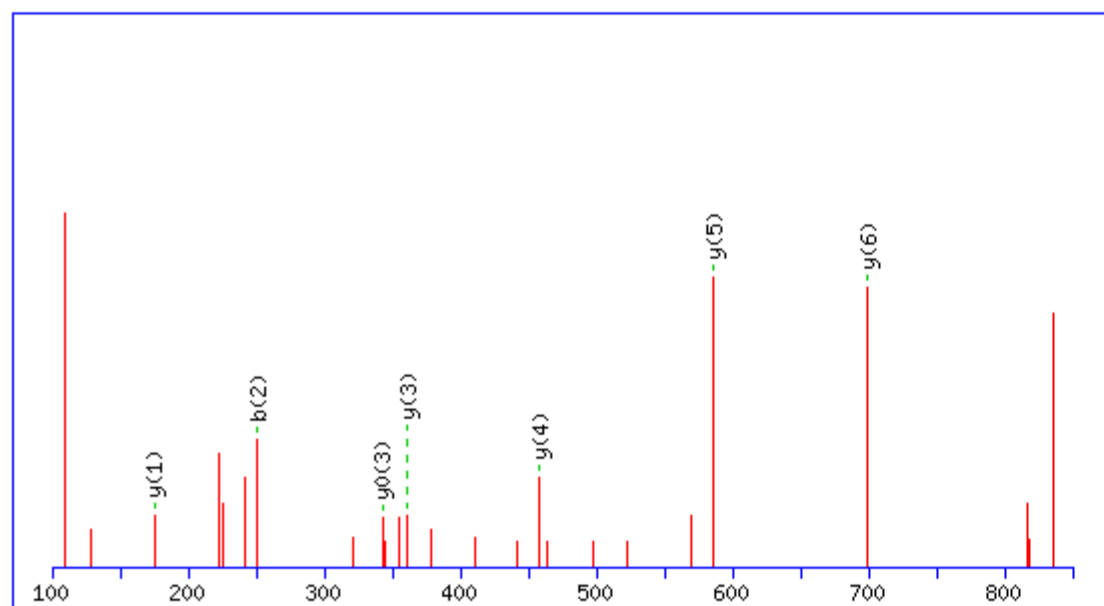

Monoisotopic mass of neutral peptide Mr(calc): 835.502808

Fixed modifications: Propionamide (C) (apply to specified residues or termini only)

Ions Score: 37 Expect: 0.00025

Matches : 7/56 fragment ions using 13 most intense peaks ([help](#))

| # | b                 | b <sup>++</sup> | b <sup>*</sup> | b <sup>*++</sup> | b <sup>0</sup> | b <sup>0++</sup> | Seq. | y                 | y <sup>++</sup> | y <sup>*</sup> | y <sup>*++</sup> | y <sup>0</sup>    | y <sup>0++</sup> | # |
|---|-------------------|-----------------|----------------|------------------|----------------|------------------|------|-------------------|-----------------|----------------|------------------|-------------------|------------------|---|
| 1 | 138.066188        | 69.536732       |                |                  |                |                  | H    |                   |                 |                |                  |                   |                  | 7 |
| 2 | <b>251.150252</b> | 126.078764      |                |                  |                |                  | I    | <b>699.451185</b> | 350.229231      | 682.424636     | 341.715956       | 681.440620        | 341.223948       | 6 |
| 3 | 379.245215        | 190.126245      | 362.218666     | 181.612971       |                |                  | K    | <b>586.367121</b> | 293.687199      | 569.340572     | 285.173924       | 568.356556        | 284.681916       | 5 |
| 4 | 476.297979        | 238.652627      | 459.271430     | 230.139353       |                |                  | P    | <b>458.272158</b> | 229.639717      | 441.245609     | 221.126443       | 440.261593        | 220.634435       | 4 |
| 5 | 575.366393        | 288.186835      | 558.339844     | 279.673560       |                |                  | V    | <b>361.219394</b> | 181.113335      | 344.192845     | 172.600060       | <b>343.208829</b> | 172.108052       | 3 |
| 6 | 662.398421        | 331.702849      | 645.371872     | 323.189574       | 644.387856     | 322.697566       | S    | 262.150980        | 131.579128      | 245.124431     | 123.065854       | 244.140415        | 122.573846       | 2 |
| 7 |                   |                 |                |                  |                |                  | R    | <b>175.118952</b> | 88.063114       | 158.092403     | 79.549840        |                   |                  | 1 |

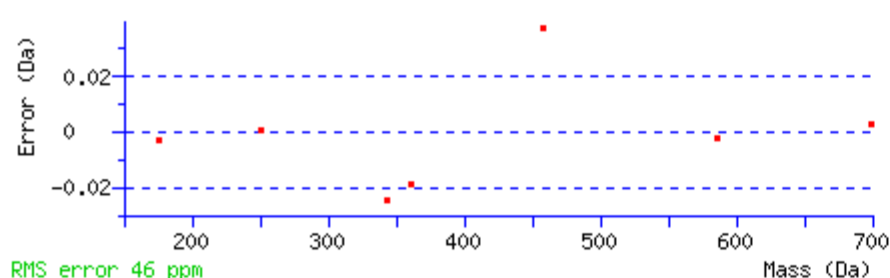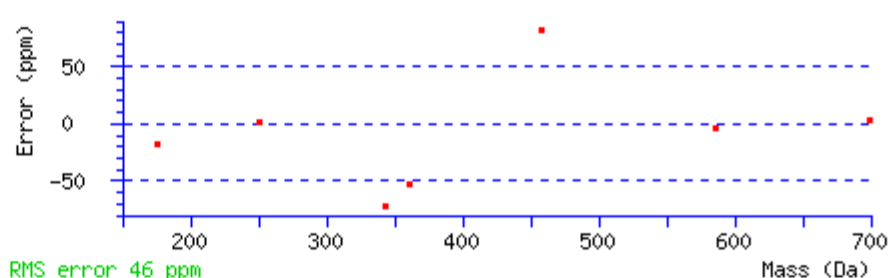

NCBI BLAST search of [HIKPVSR](#)

(Parameters: blastp, nr protein database, expect=20000, no filter, PAM30)

Other BLAST [web gateways](#)

## All matches to this query

| Score | Mr(calc):  | Delta    | Sequence                |
|-------|------------|----------|-------------------------|
| 36.6  | 835.502808 | 0.001600 | <a href="#">HIKPVSR</a> |
| 27.0  | 835.502808 | 0.001600 | <a href="#">HLQLAVR</a> |
| 21.4  | 835.502808 | 0.001600 | <a href="#">HLKSPVR</a> |
| 9.8   | 835.502808 | 0.001600 | <a href="#">HLPKLGR</a> |

# **Mascot Search Results**

## Peptide View

MS/MS Fragmentation of **LSPADDELYQR**

Found in **NDUF3\_HUMAN**, NADH dehydrogenase [ubiquinone] 1 alpha subcomplex assembly factor 3 OS=Homo sapiens GN=NDUFAF3 PE=1 SV=1

Match to Query 32305: 1305.617488 from(653.816020,2+) rtinseconds(1967) index(16573)

Title: Locus:1.1.1.2080.42

Data file 2011-11-12 - TFD - EP 6-7.mgf

Click mouse within plot area to zoom in by factor of two about that point

Or, Plot from  to  Da

Label all possible matches  Label matches used for scoring

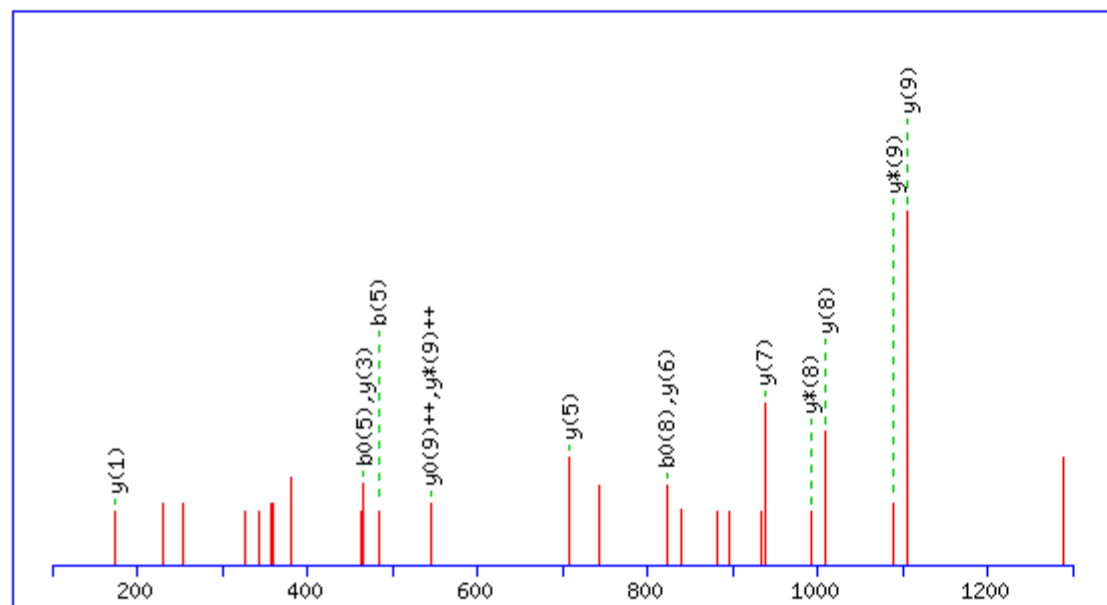

Monoisotopic mass of neutral peptide Mr(calc): 1305.620071

Fixed modifications: Propionamide (C) (apply to specified residues or termini only)

Ions Score: 40 Expect: 0.0008

Matches : 14/92 fragment ions using 24 most intense peaks [\(help\)](#)

| #  | b                 | b <sup>++</sup> | b <sup>*</sup> | b <sup>++</sup> | b <sup>0</sup>    | b <sup>0++</sup> | Seq. | y                  | y <sup>++</sup> | y <sup>*</sup>     | y <sup>++</sup>   | y <sup>0</sup> | y <sup>0++</sup>  | #  |
|----|-------------------|-----------------|----------------|-----------------|-------------------|------------------|------|--------------------|-----------------|--------------------|-------------------|----------------|-------------------|----|
| 1  | 114.091340        | 57.549308       |                |                 |                   |                  | L    |                    |                 |                    |                   |                |                   | 11 |
| 2  | 201.123368        | 101.065322      |                |                 | 183.112803        | 92.060039        | S    | 1193.543308        | 597.275292      | 1176.516759        | 588.762018        | 1175.532743    | 588.270010        | 10 |
| 3  | 298.176132        | 149.591704      |                |                 | 280.165567        | 140.586422       | P    | <b>1106.511280</b> | 553.759278      | <b>1089.484731</b> | <b>545.246004</b> | 1088.500715    | <b>544.753996</b> | 9  |
| 4  | 369.213246        | 185.110261      |                |                 | 351.202681        | 176.104978       | A    | <b>1009.458516</b> | 505.232896      | <b>992.431967</b>  | 496.719622        | 991.447951     | 496.227614        | 8  |
| 5  | <b>484.240189</b> | 242.623732      |                |                 | <b>466.229624</b> | 233.618450       | D    | <b>938.421402</b>  | 469.714339      | 921.394853         | 461.201065        | 920.410837     | 460.709057        | 7  |
| 6  | 599.267132        | 300.137204      |                |                 | 581.256567        | 291.131922       | D    | <b>823.394459</b>  | 412.200868      | 806.367910         | 403.687593        | 805.383894     | 403.195585        | 6  |
| 7  | 728.309725        | 364.658501      |                |                 | 710.299160        | 355.653218       | E    | <b>708.367516</b>  | 354.687396      | 691.340967         | 346.174122        | 690.356951     | 345.682114        | 5  |
| 8  | 841.393789        | 421.200533      |                |                 | <b>823.383224</b> | 412.195250       | L    | 579.324923         | 290.166100      | 562.298374         | 281.652825        |                |                   | 4  |
| 9  | 1004.457118       | 502.732197      |                |                 | 986.446553        | 493.726915       | Y    | <b>466.240859</b>  | 233.624068      | 449.214310         | 225.110793        |                |                   | 3  |
| 10 | 1132.515696       | 566.761486      | 1115.489147    | 558.248212      | 1114.505131       | 557.756204       | Q    | 303.177530         | 152.092403      | 286.150981         | 143.579129        |                |                   | 2  |
| 11 |                   |                 |                |                 |                   |                  | R    | <b>175.118952</b>  | 88.063114       | 158.092403         | 79.549839         |                |                   | 1  |

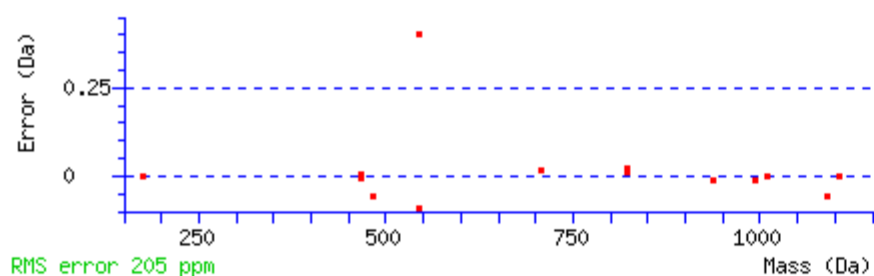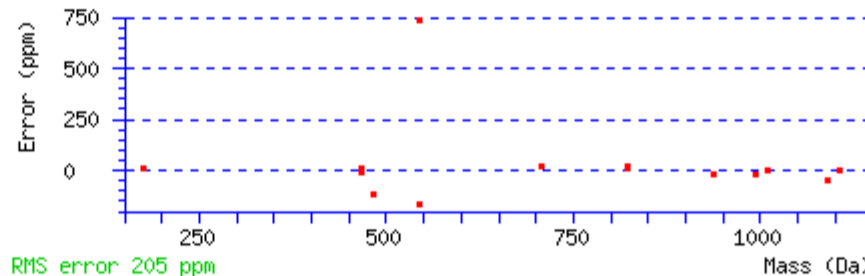

NCBI BLAST search of **LSPADDELYQR**

(Parameters: blastp, nr protein database, expect=20000, no filter, PAM30)

Other BLAST [web gateways](#)

All matches to this query

| Score | Mr(calc):   | Delta     | Sequence                    |
|-------|-------------|-----------|-----------------------------|
| 40.1  | 1305.620071 | -0.002583 | <a href="#">LSPADDELYQR</a> |

Mascot: <http://www.matrixscience.com/>

# MASCOT Search Results

## Peptide View

MS/MS Fragmentation of **VTLNPPGTFLEGVAK**

Found in **NDUAB\_HUMAN**, NADH dehydrogenase [ubiquinone] 1 alpha subcomplex subunit 11 OS=Homo sapiens GN=NDUFA11 PE=1 SV=3

Match to Query 41354: 1541.846548 from(771.930550,2+) rtinseconds(3149) index(36700)

Title: Locus:1.1.1.2534.48

Data file 2011-11-12 - TFD - EP 6-7.mgf

Click mouse within plot area to zoom in by factor of two about that point

Or, Plot from  to  Da

Label all possible matches  Label matches used for scoring

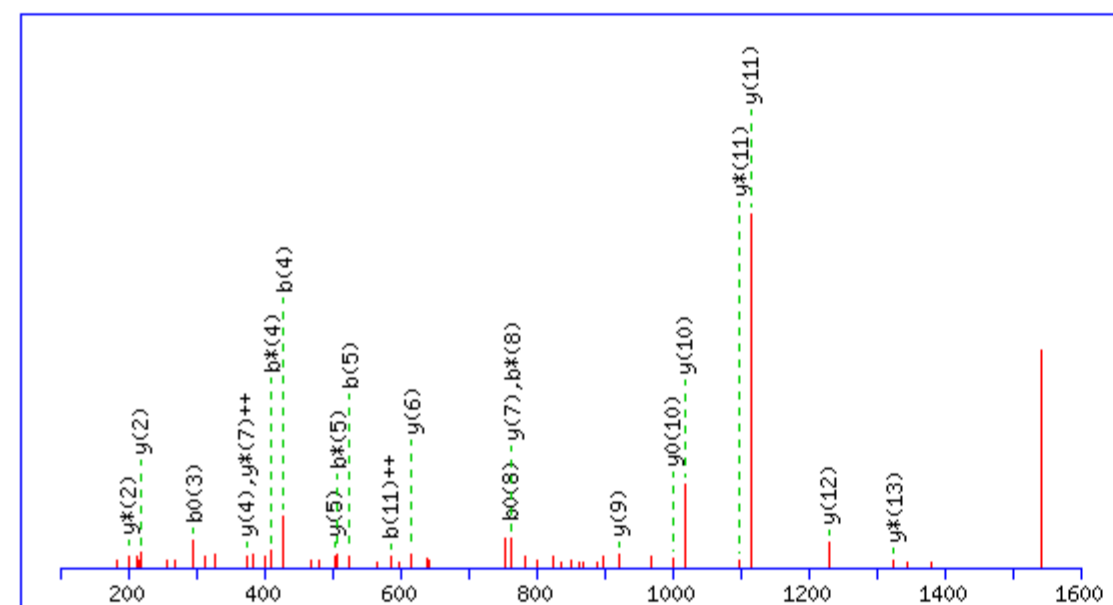

Monoisotopic mass of neutral peptide Mr(calc): 1541.845352

Fixed modifications: Propionamide (C) (apply to specified residues or termini only)

Ions Score: 61 Expect: 8.2e-006

Matches : 24/152 fragment ions using 33 most intense peaks [\(help\)](#)

| #  | b                  | b <sup>++</sup>   | b <sup>*</sup>    | b <sup>*++</sup> | b <sup>0</sup>    | b <sup>0++</sup> | Seq. | y                  | y <sup>++</sup> | y <sup>*</sup>     | y <sup>*++</sup>  | y <sup>0</sup>     | y <sup>0++</sup> | #  |
|----|--------------------|-------------------|-------------------|------------------|-------------------|------------------|------|--------------------|-----------------|--------------------|-------------------|--------------------|------------------|----|
| 1  | 100.075690         | 50.541483         |                   |                  |                   |                  | V    |                    |                 |                    |                   |                    |                  | 15 |
| 2  | <b>201.123369</b>  | 101.065322        |                   |                  | 183.112804        | 92.060040        | T    | 1443.784208        | 722.395742      | 1426.757659        | 713.882468        | 1425.773643        | 713.390460       | 14 |
| 3  | 314.207433         | 157.607354        |                   |                  | <b>296.196868</b> | 148.602072       | L    | 1342.736529        | 671.871903      | <b>1325.709980</b> | 663.358628        | 1324.725964        | 662.866620       | 13 |
| 4  | <b>428.250360</b>  | 214.628818        | <b>411.223811</b> | 206.115544       | 410.239795        | 205.623536       | N    | <b>1229.652465</b> | 615.329871      | 1212.625916        | 606.816596        | 1211.641900        | 606.324588       | 12 |
| 5  | <b>525.303124</b>  | 263.155200        | <b>508.276575</b> | 254.641926       | 507.292559        | 254.149918       | P    | <b>1115.609538</b> | 558.308407      | <b>1098.582989</b> | 549.795133        | 1097.598973        | 549.303125       | 11 |
| 6  | 622.355888         | 311.681582        | 605.329339        | 303.168308       | 604.345323        | 302.676300       | P    | <b>1018.556774</b> | 509.782025      | 1001.530225        | 501.268751        | <b>1000.546209</b> | 500.776743       | 10 |
| 7  | 679.377352         | 340.192314        | 662.350803        | 331.679040       | 661.366787        | 331.187032       | G    | <b>921.504010</b>  | 461.255643      | 904.477461         | 452.742369        | 903.493445         | 452.250361       | 9  |
| 8  | 780.425031         | 390.716154        | <b>763.398482</b> | 382.202879       | <b>762.414466</b> | 381.710871       | T    | 864.482546         | 432.744911      | 847.455997         | 424.231637        | 846.471981         | 423.739629       | 8  |
| 9  | 927.493445         | 464.250361        | 910.466896        | 455.737086       | 909.482880        | 455.245078       | F    | <b>763.434867</b>  | 382.221072      | 746.408318         | <b>373.707797</b> | 745.424302         | 373.215789       | 7  |
| 10 | 1040.577509        | 520.792393        | 1023.550960       | 512.279118       | 1022.566944       | 511.787110       | L    | <b>616.366453</b>  | 308.686865      | 599.339904         | 300.173590        | 598.355888         | 299.681582       | 6  |
| 11 | 1169.620102        | <b>585.313689</b> | 1152.593553       | 576.800415       | 1151.609537       | 576.308407       | E    | <b>503.282389</b>  | 252.144833      | 486.255840         | 243.631558        | 485.271824         | 243.139550       | 5  |
| 12 | 1226.641566        | 613.824421        | 1209.615017       | 605.311147       | 1208.631001       | 604.819139       | G    | <b>374.239796</b>  | 187.623536      | 357.213247         | 179.110261        |                    |                  | 4  |
| 13 | <b>1325.709980</b> | 663.358628        | 1308.683431       | 654.845354       | 1307.699415       | 654.353346       | V    | 317.218332         | 159.112804      | 300.191783         | 150.599530        |                    |                  | 3  |
| 14 | 1396.747094        | 698.877185        | 1379.720545       | 690.363911       | 1378.736529       | 689.871903       | A    | <b>218.149918</b>  | 109.578597      | <b>201.123369</b>  | 101.065322        |                    |                  | 2  |
| 15 |                    |                   |                   |                  |                   |                  | K    | 147.112804         | 74.060040       | 130.086255         | 65.546765         |                    |                  | 1  |

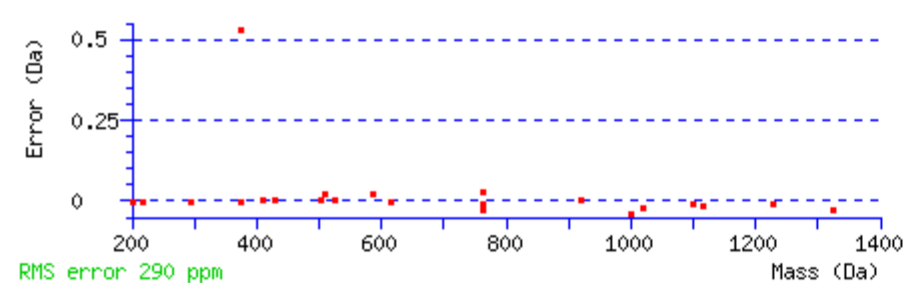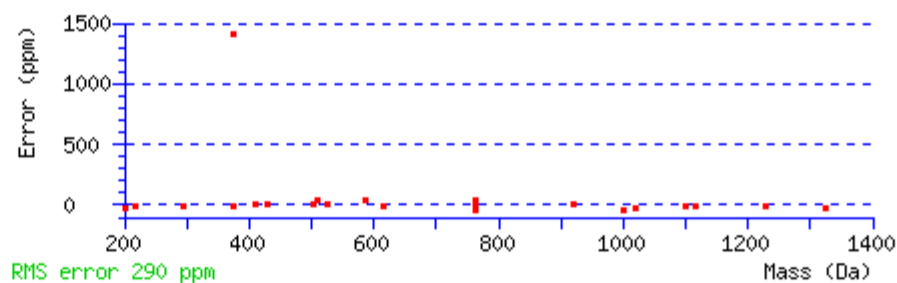

NCBI BLAST search of **VTLNPPGTFLEGVAK**

(Parameters: blastp, nr protein database, expect=20000, no filter, PAM30)

Other BLAST [web gateways](#)

## All matches to this query

| Score | Mr(calc):   | Delta     | Sequence                        |
|-------|-------------|-----------|---------------------------------|
| 60.9  | 1541.845352 | 0.001196  | <a href="#">VTLNPPGTFLEGVAK</a> |
| 6.6   | 1541.859924 | -0.013376 | <a href="#">SLIEPISMIVPRR</a>   |
| 6.5   | 1541.841293 | 0.005255  | <a href="#">AEPLLTASRTEQVK</a>  |
| 5.9   | 1541.831406 | 0.015142  | <a href="#">QSPDVAPYLRPKR</a>   |
| 5.8   | 1541.860611 | -0.014063 | <a href="#">TVLKYSFPVVSFR</a>   |
| 4.7   | 1541.841324 | 0.005224  | <a href="#">GQLEVQIQTVTQAK</a>  |
| 4.6   | 1541.856552 | -0.010004 | <a href="#">FLEQNGQLGKPLAK</a>  |
| 2.3   | 1541.852524 | -0.005976 | <a href="#">QNADNLSGTLLLKR</a>  |
| 1.9   | 1541.831406 | 0.015142  | <a href="#">QSPDVAPYLRPKR</a>   |
| 1.4   | 1541.856583 | -0.010035 | <a href="#">QEGLGRLGLPFPVK</a>  |

Mascot: <http://www.matrixscience.com/>

# MASCOT SCIENCE Mascot Search Results

## Peptide View

MS/MS Fragmentation of **ILDVLEEIPK**

Found in **NDUA5\_HUMAN**, NADH dehydrogenase [ubiquinone] 1 alpha subcomplex subunit 5 OS=Homo sapiens GN=NDUFA5 PE=1 SV=3

Match to Query 21219: 1167.668768 from(584.841660,2+) rtinseconds(3315) index(47331)

Title: Locus:1.1.1.1702.11

Data file 2012-01-27 - TFD - Epitel - IEC - 10ul - 3.mgf

Click mouse within plot area to zoom in by factor of two about that point

Or, Plot from  to  Da

Label all possible matches  Label matches used for scoring

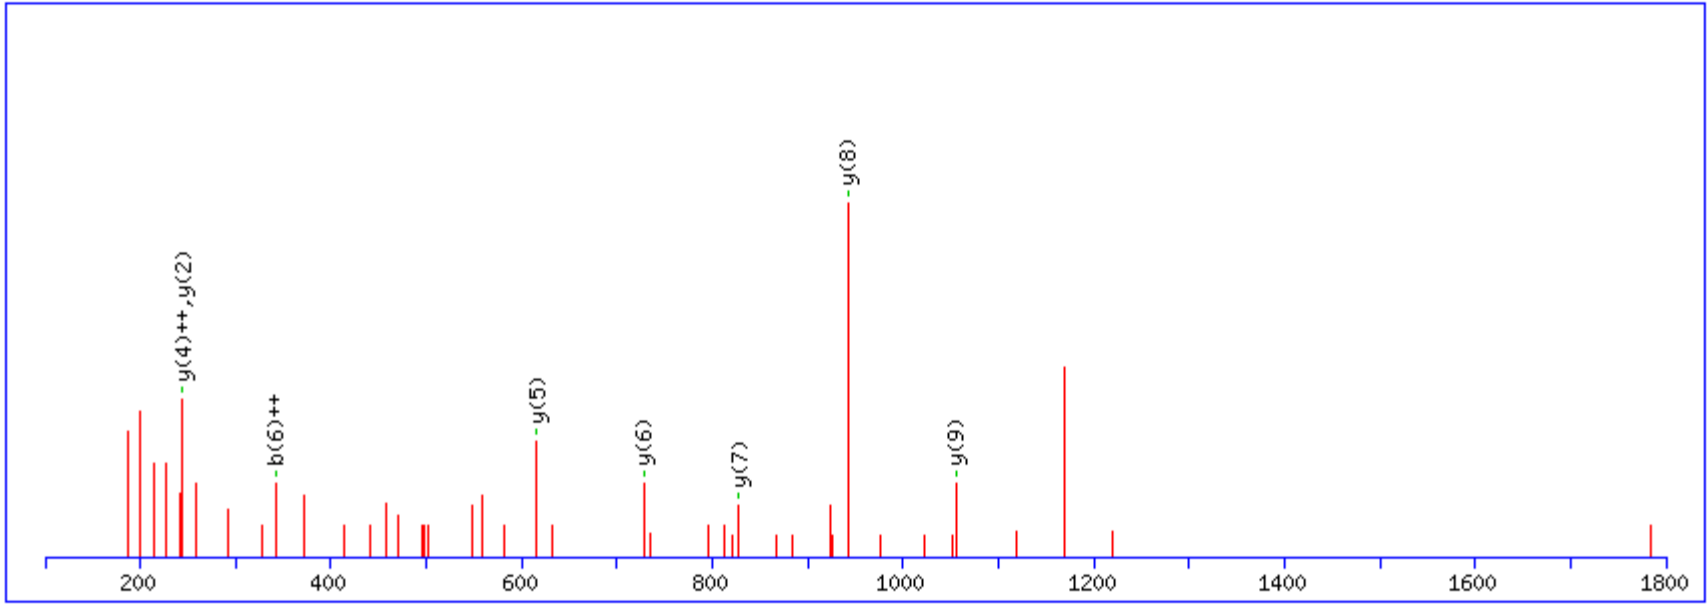

Monoisotopic mass of neutral peptide Mr(calc): 1167.675064

Fixed modifications: Carbamidomethyl (C) (apply to specified residues or termini only)

Ions Score: 43 Expect: 0.00034

Matches : 9/80 fragment ions using 10 most intense peaks ([help](#))

| #  | b           | b <sup>++</sup> | b <sup>0</sup> | b <sup>0++</sup> | Seq. | y           | y <sup>++</sup> | y <sup>*</sup> | y <sup>*++</sup> | y <sup>0</sup> | y <sup>0++</sup> | #  |
|----|-------------|-----------------|----------------|------------------|------|-------------|-----------------|----------------|------------------|----------------|------------------|----|
| 1  | 114.091340  | 57.549308       |                |                  | I    |             |                 |                |                  |                |                  | 10 |
| 2  | 227.175404  | 114.091340      |                |                  | L    | 1055.598303 | 528.302790      | 1038.571754    | 519.789515       | 1037.587738    | 519.297507       | 9  |
| 3  | 342.202347  | 171.604811      | 324.191782     | 162.599529       | D    | 942.514239  | 471.760758      | 925.487690     | 463.247483       | 924.503674     | 462.755475       | 8  |
| 4  | 441.270761  | 221.139018      | 423.260196     | 212.133736       | V    | 827.487296  | 414.247286      | 810.460747     | 405.734012       | 809.476731     | 405.242004       | 7  |
| 5  | 554.354825  | 277.681051      | 536.344260     | 268.675768       | L    | 728.418882  | 364.713079      | 711.392333     | 356.199805       | 710.408317     | 355.707797       | 6  |
| 6  | 683.397418  | 342.202347      | 665.386853     | 333.197065       | E    | 615.334818  | 308.171047      | 598.308269     | 299.657773       | 597.324253     | 299.165765       | 5  |
| 7  | 812.440011  | 406.723644      | 794.429446     | 397.718361       | E    | 486.292225  | 243.649751      | 469.265676     | 235.136476       | 468.281660     | 234.644468       | 4  |
| 8  | 925.524075  | 463.265676      | 907.513510     | 454.260393       | I    | 357.249632  | 179.128454      | 340.223083     | 170.615180       |                |                  | 3  |
| 9  | 1022.576839 | 511.792058      | 1004.566274    | 502.786775       | P    | 244.165568  | 122.586422      | 227.139019     | 114.073148       |                |                  | 2  |
| 10 |             |                 |                |                  | K    | 147.112804  | 74.060040       | 130.086255     | 65.546765        |                |                  | 1  |

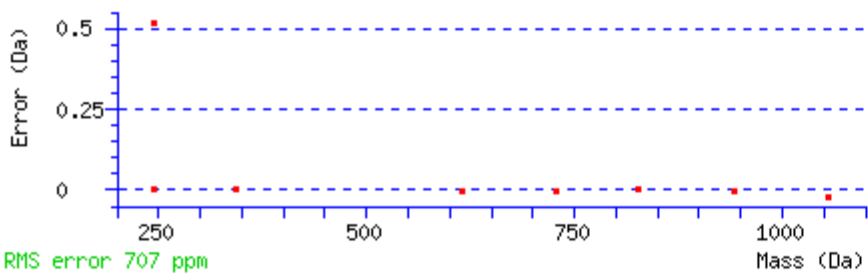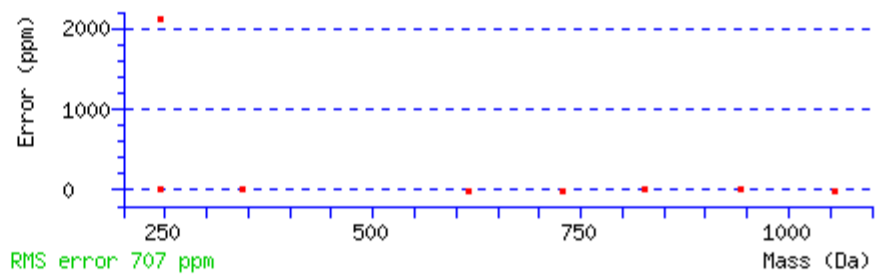

NCBI BLAST search of **ILDVLEEIPK**

(Parameters: blastp, nr protein database, expect=20000, no filter, PAM30)

Other BLAST [web gateways](#)

## All matches to this query

| Score | Mr(calc):   | Delta     | Sequence                    |
|-------|-------------|-----------|-----------------------------|
| 42.9  | 1167.675064 | -0.006296 | <a href="#">ILDVLEEIPK</a>  |
| 9.1   | 1167.668564 | 0.000204  | <a href="#">ILVPMNTPGVK</a> |
| 4.5   | 1167.661163 | 0.007605  | <a href="#">SDLLGKPLGPR</a> |
| 2.5   | 1167.672379 | -0.003611 | <a href="#">IPAEGRVALAR</a> |
| 0.5   | 1167.657318 | 0.011450  | <a href="#">PLPLLPMDLK</a>  |
| 0.2   | 1167.661148 | 0.007620  | <a href="#">LIGPQLDEKR</a>  |

Mascot: <http://www.matrixscience.com/>



**Peptide View**

MS/MS Fragmentation of **TMAVLQIEAEK**

Found in **NDUB5\_HUMAN**, NADH dehydrogenase [ubiquinone] 1 beta subcomplex subunit 5, mitochondrial OS=Homo sapiens GN=NDUFB5 PE=1 SV=1

Match to Query 35922: 1247.640808 from(624.827680,2+) rtinseconds(2013) index(21200)

Title: Locus:1.1.1.1985.43

Data file 2011-11-12 - TFD - EP 5-6.mgf

Click mouse within plot area to zoom in by factor of two about that point

Or, Plot from  to  Da

Label all possible matches  Label matches used for scoring

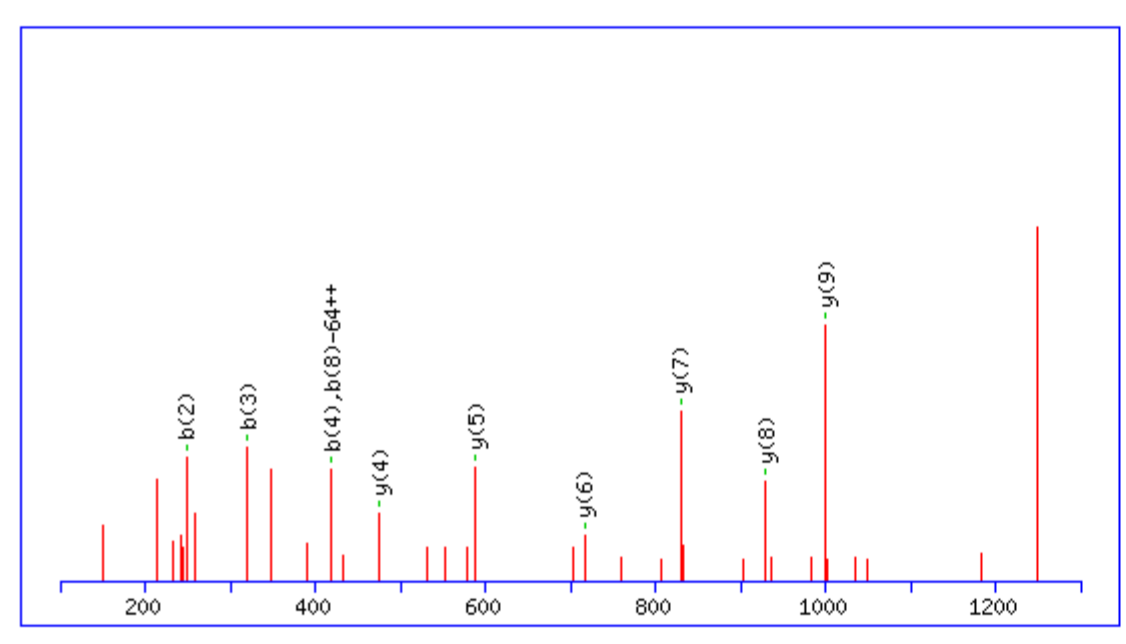

Monoisotopic mass of neutral peptide Mr(calc): 1247.643112

Fixed modifications: Propionamide (C) (apply to specified residues or termini only)

Variable modifications:

M2 : Oxidation (M), with neutral losses 0.000000 (shown in table), 63.998285

Ions Score: 61 Expect: 2.6e-006

Matches : 10/160 fragment ions using 10 most intense peaks [\(help\)](#)

| #  | b                 | b <sup>++</sup> | b <sup>*</sup> | b <sup>*++</sup> | b <sup>0</sup> | b <sup>0++</sup> | Seq. | y                  | y <sup>++</sup> | y <sup>*</sup> | y <sup>*++</sup> | y <sup>0</sup> | y <sup>0++</sup> | #  |
|----|-------------------|-----------------|----------------|------------------|----------------|------------------|------|--------------------|-----------------|----------------|------------------|----------------|------------------|----|
| 1  | 102.054955        | 51.531116       |                |                  | 84.044390      | 42.525833        | T    |                    |                 |                |                  |                |                  | 11 |
| 2  | <b>249.090355</b> | 125.048815      |                |                  | 231.079790     | 116.043533       | M    | 1147.602738        | 574.305007      | 1130.576189    | 565.791733       | 1129.592173    | 565.299725       | 10 |
| 3  | <b>320.127469</b> | 160.567372      |                |                  | 302.116904     | 151.562090       | A    | <b>1000.567338</b> | 500.787307      | 983.540789     | 492.274033       | 982.556773     | 491.782025       | 9  |
| 4  | <b>419.195883</b> | 210.101579      |                |                  | 401.185318     | 201.096297       | V    | <b>929.530224</b>  | 465.268750      | 912.503675     | 456.755476       | 911.519659     | 456.263468       | 8  |
| 5  | 532.279947        | 266.643612      |                |                  | 514.269382     | 257.638329       | L    | <b>830.461810</b>  | 415.734543      | 813.435261     | 407.221269       | 812.451245     | 406.729261       | 7  |
| 6  | 660.338525        | 330.672901      | 643.311976     | 322.159626       | 642.327960     | 321.667618       | Q    | <b>717.377746</b>  | 359.192511      | 700.351197     | 350.679237       | 699.367181     | 350.187229       | 6  |
| 7  | 773.422589        | 387.214933      | 756.396040     | 378.701658       | 755.412024     | 378.209650       | I    | <b>589.319168</b>  | 295.163222      | 572.292619     | 286.649948       | 571.308603     | 286.157940       | 5  |
| 8  | 902.465182        | 451.736229      | 885.438633     | 443.222955       | 884.454617     | 442.730947       | E    | <b>476.235104</b>  | 238.621190      | 459.208555     | 230.107915       | 458.224539     | 229.615907       | 4  |
| 9  | 973.502296        | 487.254786      | 956.475747     | 478.741512       | 955.491731     | 478.249504       | A    | 347.192511         | 174.099893      | 330.165962     | 165.586619       | 329.181946     | 165.094611       | 3  |
| 10 | 1102.544889       | 551.776083      | 1085.518340    | 543.262808       | 1084.534324    | 542.770800       | E    | 276.155397         | 138.581336      | 259.128848     | 130.068062       | 258.144832     | 129.576054       | 2  |
| 11 |                   |                 |                |                  |                |                  | K    | 147.112804         | 74.060040       | 130.086255     | 65.546765        |                |                  | 1  |

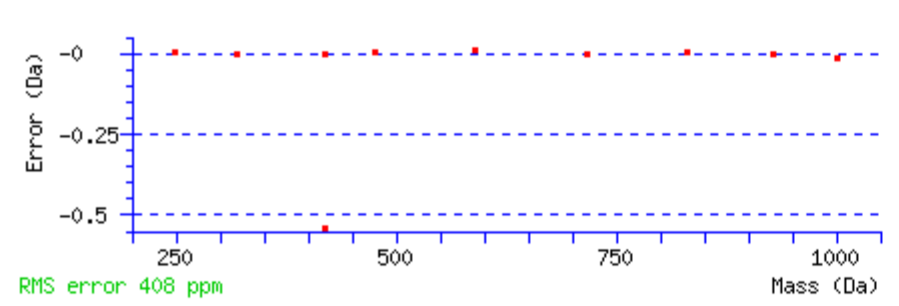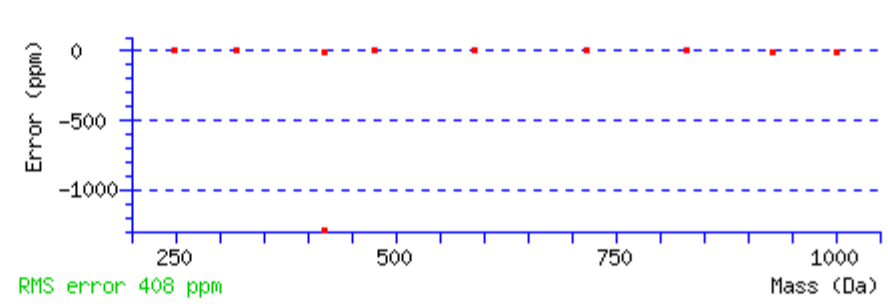

NCBI BLAST search of [TMAVLQIEAEK](#)

(Parameters: blastp, nr protein database, expect=20000, no filter, PAM30)

Other BLAST [web gateways](#)

**All matches to this query**

| Score | Mr(calc):   | Delta     | Sequence                    |
|-------|-------------|-----------|-----------------------------|
| 60.5  | 1247.643112 | -0.002304 | <a href="#">TMAVLQIEAEK</a> |
| 1.1   | 1247.633224 | 0.007584  | <a href="#">APQNLFMAAGK</a> |

# MASCOT Search Results

## Peptide View

MS/MS Fragmentation of **IFPGDTILETGEVIPP**MK

Found in **NDUB6\_HUMAN**, NADH dehydrogenase [ubiquinone] 1 beta subcomplex subunit 6 OS=Homo sapiens GN=NDUFB6 PE=1 SV=3

Match to Query 56321: 1972.013652 from(658.345160,3+) rtinseconds(3336) index(46114)

Title: Locus:1.1.1.2421.18

Data file 2011-11-12 - TFD - EP 6-6.mgf

Click mouse within plot area to zoom in by factor of two about that point

Or, Plot from  to  Da

Label all possible matches  Label matches used for scoring

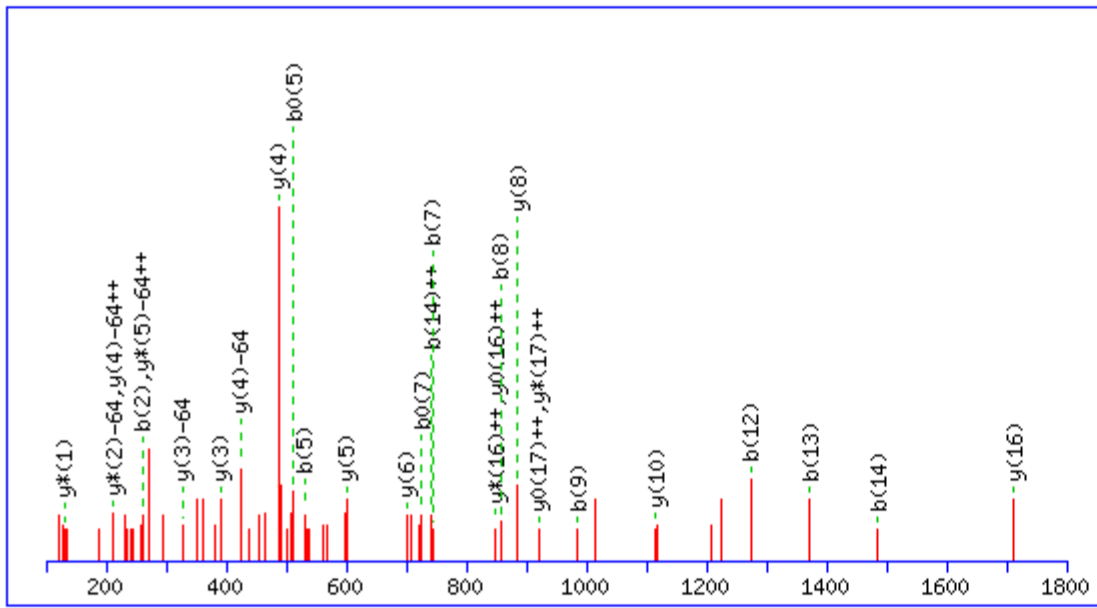

Monoisotopic mass of neutral peptide Mr(calc): 1972.022720

Fixed modifications: Propionamide (C) (apply to specified residues or termini only)

Variable modifications:

M17 : Oxidation (M), with neutral losses 0.000000 (shown in table), 63.998285

Ions Score: 44 Expect: 0.00041

Matches : 28/240 fragment ions using 42 most intense peaks ([help](#))

| #  | b                  | b <sup>++</sup>   | b <sup>0</sup>    | b <sup>0++</sup> | Seq. | y                  | y <sup>++</sup> | y <sup>*</sup>    | y <sup>*++</sup>  | y <sup>0</sup> | y <sup>0++</sup>  | #  |
|----|--------------------|-------------------|-------------------|------------------|------|--------------------|-----------------|-------------------|-------------------|----------------|-------------------|----|
| 1  | 114.091340         | 57.549308         |                   |                  | I    |                    |                 |                   |                   |                |                   | 18 |
| 2  | <b>261.159754</b>  | 131.083515        |                   |                  | F    | 1859.945931        | 930.476604      | 1842.919382       | <b>921.963329</b> | 1841.935366    | <b>921.471321</b> | 17 |
| 3  | 358.212518         | 179.609897        |                   |                  | P    | <b>1712.877517</b> | 856.942396      | 1695.850968       | <b>848.429122</b> | 1694.866952    | <b>847.937114</b> | 16 |
| 4  | 415.233982         | 208.120629        |                   |                  | G    | 1615.824753        | 808.416014      | 1598.798204       | 799.902740        | 1597.814188    | 799.410732        | 15 |
| 5  | <b>530.260925</b>  | 265.634101        | <b>512.250360</b> | 256.628818       | D    | 1558.803289        | 779.905283      | 1541.776740       | 771.392008        | 1540.792724    | 770.900000        | 14 |
| 6  | 631.308604         | 316.157940        | 613.298039        | 307.152658       | T    | 1443.776346        | 722.391811      | 1426.749797       | 713.878537        | 1425.765781    | 713.386528        | 13 |
| 7  | <b>744.392668</b>  | 372.699972        | <b>726.382103</b> | 363.694690       | I    | 1342.728667        | 671.867971      | 1325.702118       | 663.354697        | 1324.718102    | 662.862689        | 12 |
| 8  | <b>857.476732</b>  | 429.242004        | 839.466167        | 420.236722       | L    | 1229.644603        | 615.325940      | 1212.618054       | 606.812665        | 1211.634038    | 606.320657        | 11 |
| 9  | <b>986.519325</b>  | 493.763301        | 968.508760        | 484.758018       | E    | <b>1116.560539</b> | 558.783907      | 1099.533990       | 550.270633        | 1098.549974    | 549.778625        | 10 |
| 10 | 1087.567004        | 544.287140        | 1069.556439       | 535.281858       | T    | 987.517946         | 494.262611      | 970.491397        | 485.749336        | 969.507381     | 485.257328        | 9  |
| 11 | 1144.588468        | 572.797872        | 1126.577903       | 563.792589       | G    | <b>886.470267</b>  | 443.738771      | 869.443718        | 435.225497        | 868.459702     | 434.733489        | 8  |
| 12 | <b>1273.631061</b> | 637.319168        | 1255.620496       | 628.313886       | E    | 829.448803         | 415.228040      | 812.422254        | 406.714765        | 811.438238     | 406.222757        | 7  |
| 13 | <b>1372.699475</b> | 686.853375        | 1354.688910       | 677.848093       | V    | <b>700.406210</b>  | 350.706743      | 683.379661        | 342.193469        |                |                   | 6  |
| 14 | <b>1485.783539</b> | <b>743.395407</b> | 1467.772974       | 734.390125       | I    | <b>601.337796</b>  | 301.172536      | 584.311247        | 292.659262        |                |                   | 5  |
| 15 | 1582.836303        | 791.921789        | 1564.825738       | 782.916507       | P    | <b>488.253732</b>  | 244.630504      | 471.227183        | 236.117230        |                |                   | 4  |
| 16 | 1679.889067        | 840.448171        | 1661.878502       | 831.442889       | P    | <b>391.200968</b>  | 196.104122      | 374.174419        | 187.590848        |                |                   | 3  |
| 17 | 1826.924467        | 913.965871        | 1808.913902       | 904.960589       | M    | 294.148204         | 147.577740      | 277.121655        | 139.064465        |                |                   | 2  |
| 18 |                    |                   |                   |                  | K    | 147.112804         | 74.060040       | <b>130.086255</b> | 65.546765         |                |                   | 1  |

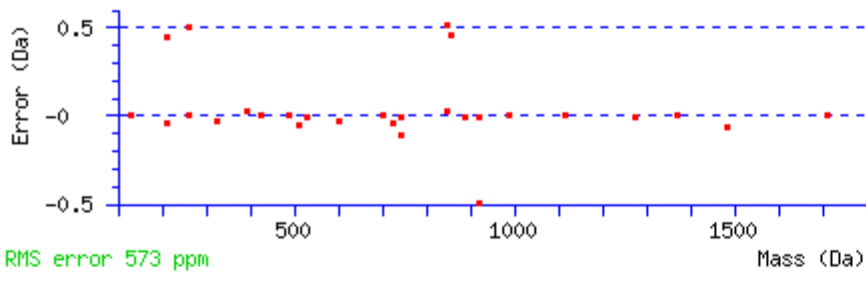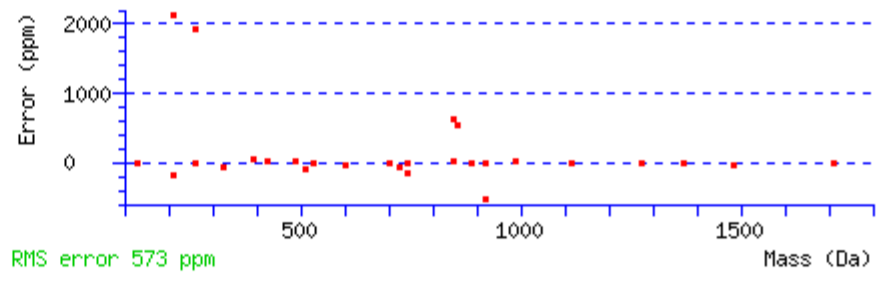

NCBI BLAST search of [IFPGDTILETGEVIPP](#)MK

(Parameters: blastp, nr protein database, expect=20000, no filter, PAM30)

Other BLAST [web gateways](#)

## All matches to this query

| Score | Mr(calc):   | Delta     | Sequence                            |
|-------|-------------|-----------|-------------------------------------|
| 43.9  | 1972.022720 | -0.009068 | <a href="#">IFPGDTILETGEVIPP</a> MK |
| 39.3  | 1972.022720 | -0.009068 | <a href="#">IFPGDTILETGEVIPP</a> MK |
| 33.3  | 1972.022720 | -0.009068 | <a href="#">IFPGDTILETGEVIPP</a> MK |
| 7.3   | 1972.001389 | 0.012263  | <a href="#">ERPGYRAGVAAPDLLDPK</a>  |
| 5.2   | 1972.026566 | -0.012914 | <a href="#">LVGPAFLDGPQSLDDKLR</a>  |
| 3.9   | 1972.022491 | -0.008839 | <a href="#">NGDEISKLSQLVNSNNLK</a>  |
| 3.1   | 1972.011307 | 0.002345  | <a href="#">QVPDTSVQETDRILVEK</a>   |
| 0.8   | 1972.002289 | 0.011363  | <a href="#">GTPIGMPPPGMRPPPPGIR</a> |
| 0.2   | 1972.001419 | 0.012233  | <a href="#">GLPPPLQQQQQPPPPQOK</a>  |
| 0.2   | 1972.001419 | 0.012233  | <a href="#">GLPPPLQQQQQPPPPQOK</a>  |

# Mascot Search Results

## Peptide View

MS/MS Fragmentation of **DSFPNFLACK**

Found in **NDUB7\_HUMAN**, NADH dehydrogenase [ubiquinone] 1 beta subcomplex subunit 7 OS=Homo sapiens GN=NDUFB7 PE=1 SV=4

Match to Query 30168: 1211.568928 from(606.791740,2+) rtinseconds(3094) index(37805)

Title: Locus:1.1.1.2445.19

Data file 2011-11-10 - TFD - EP 3-6.mgf

Click mouse within plot area to zoom in by factor of two about that point

Or, Plot from  to  Da

Label all possible matches  Label matches used for scoring

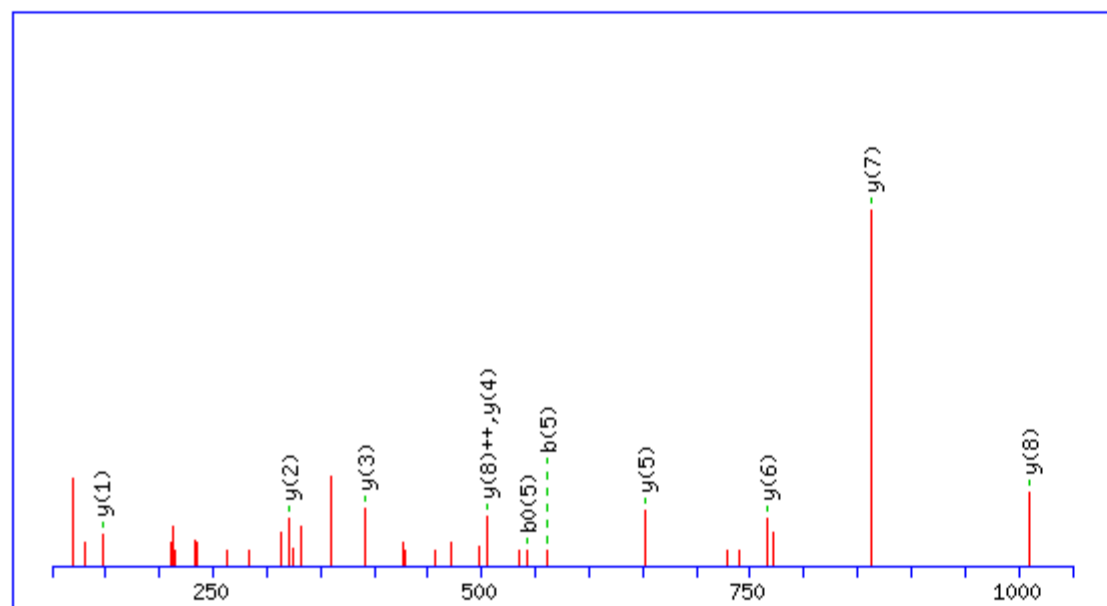

Monoisotopic mass of neutral peptide Mr(calc): 1211.564484

Fixed modifications: Propionamide (C) (apply to specified residues or termini only)

Ions Score: 49 Expect: 9.8e-005

Matches : 11/84 fragment ions using 21 most intense peaks ([help](#))

| #  | b                 | b <sup>++</sup> | b*          | b <sup>+++</sup> | b <sup>0</sup>    | b <sup>0++</sup> | Seq. | y                  | y <sup>++</sup>   | y*          | y <sup>+++</sup> | y <sup>0</sup> | y <sup>0++</sup> | #  |
|----|-------------------|-----------------|-------------|------------------|-------------------|------------------|------|--------------------|-------------------|-------------|------------------|----------------|------------------|----|
| 1  | 116.034219        | 58.520748       |             |                  | 98.023654         | 49.515465        | D    |                    |                   |             |                  |                |                  | 10 |
| 2  | 203.066247        | 102.036761      |             |                  | 185.055682        | 93.031479        | S    | 1097.544828        | 549.276052        | 1080.518279 | 540.762778       | 1079.534263    | 540.270770       | 9  |
| 3  | 350.134661        | 175.570968      |             |                  | 332.124096        | 166.565686       | F    | <b>1010.512800</b> | <b>505.760038</b> | 993.486251  | 497.246764       |                |                  | 8  |
| 4  | 447.187425        | 224.097351      |             |                  | 429.176860        | 215.092068       | P    | <b>863.444386</b>  | 432.225831        | 846.417837  | 423.712557       |                |                  | 7  |
| 5  | <b>561.230352</b> | 281.118814      | 544.203803  | 272.605540       | <b>543.219787</b> | 272.113532       | N    | <b>766.391622</b>  | 383.699449        | 749.365073  | 375.186175       |                |                  | 6  |
| 6  | 708.298766        | 354.653021      | 691.272217  | 346.139747       | 690.288201        | 345.647739       | F    | <b>652.348695</b>  | 326.677986        | 635.322146  | 318.164711       |                |                  | 5  |
| 7  | 821.382830        | 411.195053      | 804.356281  | 402.681779       | 803.372265        | 402.189771       | L    | <b>505.280281</b>  | 253.143779        | 488.253732  | 244.630504       |                |                  | 4  |
| 8  | 892.419944        | 446.713610      | 875.393395  | 438.200335       | 874.409379        | 437.708328       | A    | <b>392.196217</b>  | 196.601747        | 375.169668  | 188.088472       |                |                  | 3  |
| 9  | 1066.466243       | 533.736760      | 1049.439694 | 525.223485       | 1048.455678       | 524.731477       | C    | <b>321.159103</b>  | 161.083190        | 304.132554  | 152.569915       |                |                  | 2  |
| 10 |                   |                 |             |                  |                   |                  | K    | <b>147.112804</b>  | 74.060040         | 130.086255  | 65.546765        |                |                  | 1  |

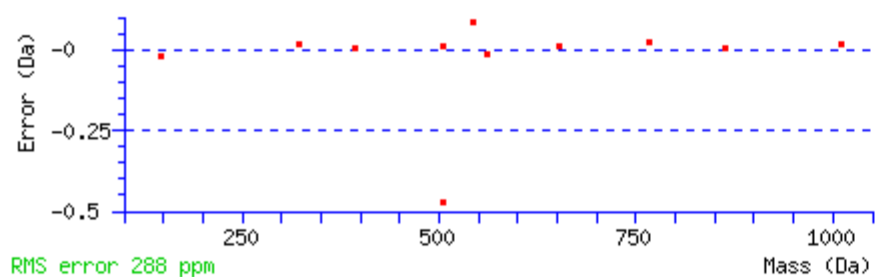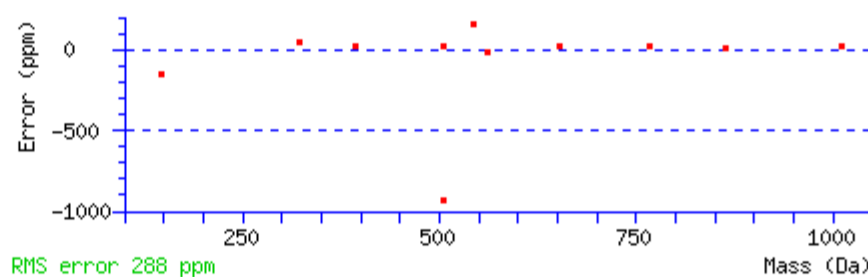

NCBI BLAST search of **DSFPNFLACK**

(Parameters: blastp, nr protein database, expect=20000, no filter, PAM30)

Other BLAST [web gateways](#)

All matches to this query

| Score | Mr(calc):   | Delta    | Sequence                   |
|-------|-------------|----------|----------------------------|
| 48.6  | 1211.564484 | 0.004444 | <a href="#">DSFPNFLACK</a> |
| 5.5   | 1211.567856 | 0.001072 | <a href="#">MMSNQYVPVK</a> |
| 0.8   | 1211.563812 | 0.005116 | <a href="#">LAMTREMNSK</a> |

Mascot: <http://www.matrixscience.com/>

# MASCOT Search Results

## Peptide View

MS/MS Fragmentation of **DMFPGPYPR**

Found in **NDUB8\_HUMAN**, NADH dehydrogenase [ubiquinone] 1 beta subcomplex subunit 8, mitochondrial OS=Homo sapiens GN=NDUFB8 PE=1 SV=1

Match to Query 23177: 1094.489568 from(548.252060,2+) rtinseconds(2089) index(21314)

Title: Locus:1.1.1.2063.28

Data file 2011-11-10 - TFD - EP 3-6.mgf

Click mouse within plot area to zoom in by factor of two about that point

Or, Plot from  to  Da

Label all possible matches  Label matches used for scoring

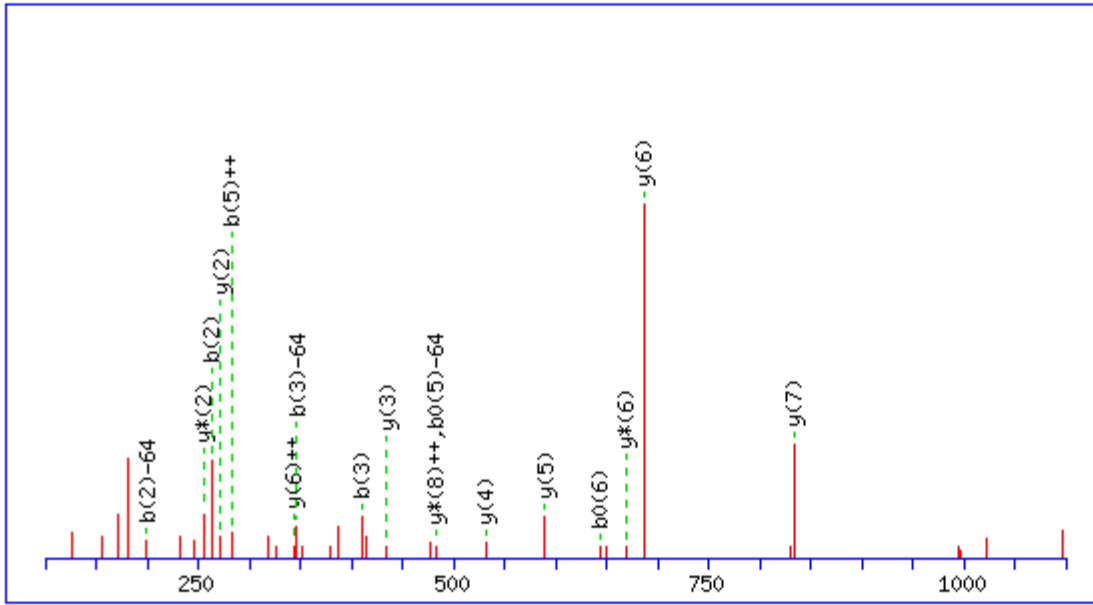

Monoisotopic mass of neutral peptide Mr(calc): 1094.485519

Fixed modifications: Propionamide (C) (apply to specified residues or termini only)

Variable modifications:

M2 : Oxidation (M), with neutral losses 0.000000 (shown in table), 63.998285

Ions Score: 32 Expect: 0.0035

Matches : 17/96 fragment ions using 31 most intense peaks [\(help\)](#)

| # | b                 | b <sup>++</sup>   | b <sup>0</sup>    | b <sup>0++</sup> | Seq. | y                 | y <sup>++</sup>   | y <sup>*</sup>    | y <sup>***</sup>  | # |
|---|-------------------|-------------------|-------------------|------------------|------|-------------------|-------------------|-------------------|-------------------|---|
| 1 | 116.034219        | 58.520748         | 98.023654         | 49.515465        | D    |                   |                   |                   |                   | 9 |
| 2 | <b>263.069619</b> | 132.038447        | 245.059054        | 123.033165       | M    | 980.465851        | 490.736564        | 963.439302        | <b>482.223289</b> | 8 |
| 3 | <b>410.138033</b> | 205.572655        | 392.127468        | 196.567372       | F    | <b>833.430451</b> | 417.218864        | 816.403902        | 408.705589        | 7 |
| 4 | 507.190797        | 254.099037        | 489.180232        | 245.093754       | P    | <b>686.362037</b> | <b>343.684657</b> | <b>669.335488</b> | 335.171382        | 6 |
| 5 | 564.212261        | <b>282.609769</b> | 546.201696        | 273.604486       | G    | <b>589.309273</b> | 295.158275        | 572.282724        | 286.645000        | 5 |
| 6 | 661.265025        | 331.136151        | <b>643.254460</b> | 322.130868       | P    | <b>532.287809</b> | 266.647543        | 515.261260        | 258.134268        | 4 |
| 7 | 824.328354        | 412.667815        | 806.317789        | 403.662533       | Y    | <b>435.235045</b> | 218.121161        | 418.208496        | 209.607886        | 3 |
| 8 | 921.381118        | 461.194197        | 903.370553        | 452.188915       | P    | <b>272.171716</b> | 136.589496        | <b>255.145167</b> | 128.076221        | 2 |
| 9 |                   |                   |                   |                  | R    | 175.118952        | 88.063114         | 158.092403        | 79.549839         | 1 |

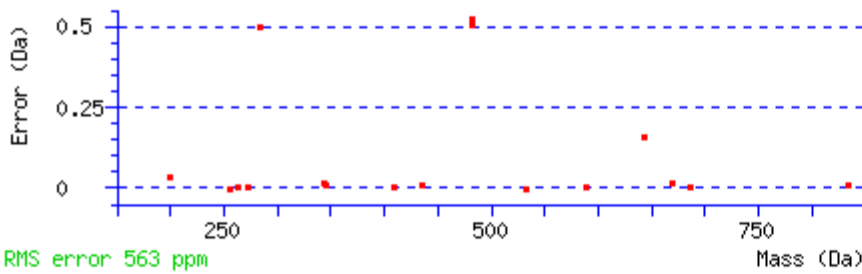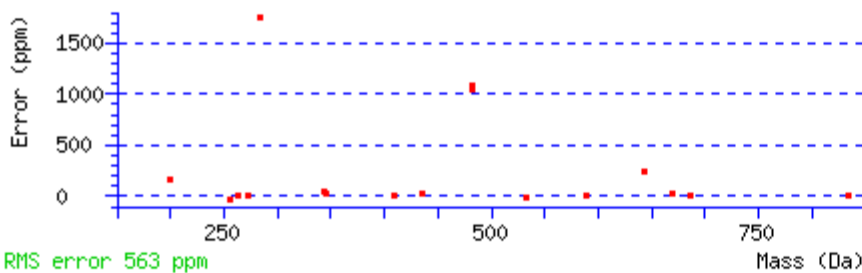

NCBI BLAST search of [DMFPGPYPR](#)

(Parameters: blastp, nr protein database, expect=20000, no filter, PAM30)

Other BLAST [web gateways](#)

All matches to this query

| Score | Mr(calc):   | Delta    | Sequence                  |
|-------|-------------|----------|---------------------------|
| 31.8  | 1094.485519 | 0.004049 | <a href="#">DMFPGPYPR</a> |
| 3.1   | 1094.485519 | 0.004049 | <a href="#">DMFPGPYPR</a> |

# MASCOT Search Results

## Peptide View

MS/MS Fragmentation of **LDITTLTGVP EEHIK**

Found in **NDUS4\_HUMAN**, NADH dehydrogenase [ubiquinone] iron-sulfur protein 4, mitochondrial OS=Homo sapiens GN=NDUFS4 PE=1 SV=1

Match to Query 49342: 1664.900442 from(555.974090,3+) rtinseconds(2907) index(36221)

Title: Locus:1.1.1.2380.19

Data file 2011-11-14 - TFD - EP 8-6.mgf

Click mouse within plot area to zoom in by factor of two about that point

Or, Plot from  to  Da

Label all possible matches  Label matches used for scoring

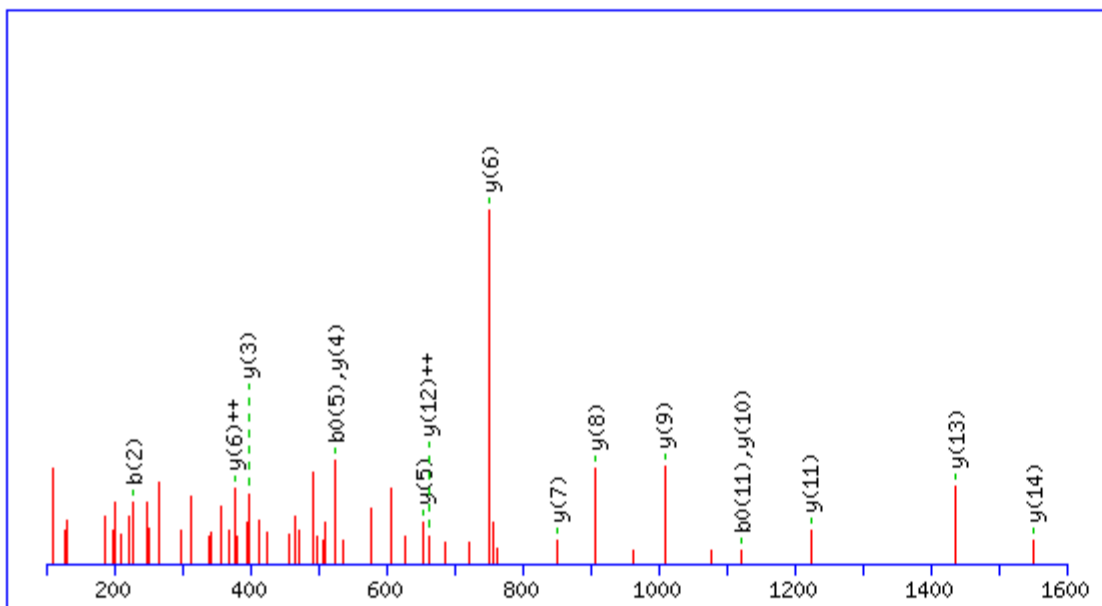

Monoisotopic mass of neutral peptide Mr(calc): 1664.898499

Fixed modifications: Propionamide (C) (apply to specified residues or termini only)

Ions Score: 83 Expect: 3.7e-008

Matches : 16/132 fragment ions using 23 most intense peaks [\(help\)](#)

| #  | b                 | b <sup>++</sup> | b <sup>0</sup>     | b <sup>0++</sup> | Seq. | y                  | y <sup>++</sup>   | y <sup>*</sup> | y <sup>+++</sup> | y <sup>0</sup> | y <sup>0++</sup> | #  |
|----|-------------------|-----------------|--------------------|------------------|------|--------------------|-------------------|----------------|------------------|----------------|------------------|----|
| 1  | 114.091340        | 57.549308       |                    |                  | L    |                    |                   |                |                  |                |                  | 15 |
| 2  | <b>229.118283</b> | 115.062779      | 211.107718         | 106.057497       | D    | <b>1552.821716</b> | 776.914496        | 1535.795167    | 768.401222       | 1534.811151    | 767.909214       | 14 |
| 3  | 342.202347        | 171.604811      | 324.191782         | 162.599529       | I    | <b>1437.794773</b> | 719.401025        | 1420.768224    | 710.887750       | 1419.784208    | 710.395742       | 13 |
| 4  | 443.250026        | 222.128651      | 425.239461         | 213.123369       | T    | 1324.710709        | <b>662.858993</b> | 1307.684160    | 654.345718       | 1306.700144    | 653.853710       | 12 |
| 5  | 544.297705        | 272.652491      | <b>526.287140</b>  | 263.647208       | T    | <b>1223.663030</b> | 612.335153        | 1206.636481    | 603.821879       | 1205.652465    | 603.329870       | 11 |
| 6  | 657.381769        | 329.194523      | 639.371204         | 320.189240       | L    | <b>1122.615351</b> | 561.811314        | 1105.588802    | 553.298039       | 1104.604786    | 552.806031       | 10 |
| 7  | 758.429448        | 379.718362      | 740.418883         | 370.713080       | T    | <b>1009.531287</b> | 505.269282        | 992.504738     | 496.756007       | 991.520722     | 496.263999       | 9  |
| 8  | 815.450912        | 408.229094      | 797.440347         | 399.223812       | G    | <b>908.483608</b>  | 454.745442        | 891.457059     | 446.232168       | 890.473043     | 445.740160       | 8  |
| 9  | 914.519326        | 457.763301      | 896.508761         | 448.758019       | V    | <b>851.462144</b>  | 426.234710        | 834.435595     | 417.721435       | 833.451579     | 417.229427       | 7  |
| 10 | 1011.572090       | 506.289683      | 993.561525         | 497.284401       | P    | <b>752.393730</b>  | <b>376.700503</b> | 735.367181     | 368.187229       | 734.383165     | 367.695221       | 6  |
| 11 | 1140.614683       | 570.810980      | <b>1122.604118</b> | 561.805697       | E    | <b>655.340966</b>  | 328.174121        | 638.314417     | 319.660846       | 637.330401     | 319.168838       | 5  |
| 12 | 1269.657276       | 635.332276      | 1251.646711        | 626.326994       | E    | <b>526.298373</b>  | 263.652825        | 509.271824     | 255.139550       | 508.287808     | 254.647542       | 4  |
| 13 | 1406.716188       | 703.861732      | 1388.705623        | 694.856450       | H    | <b>397.255780</b>  | 199.131528        | 380.229231     | 190.618253       |                |                  | 3  |
| 14 | 1519.800252       | 760.403764      | 1501.789687        | 751.398482       | I    | 260.196868         | 130.602072        | 243.170319     | 122.088797       |                |                  | 2  |
| 15 |                   |                 |                    |                  | K    | 147.112804         | 74.060040         | 130.086255     | 65.546765        |                |                  | 1  |

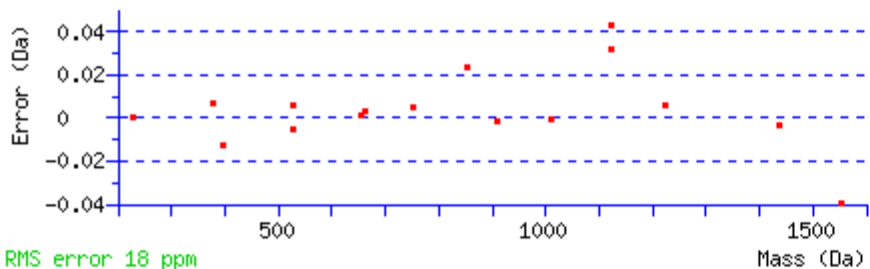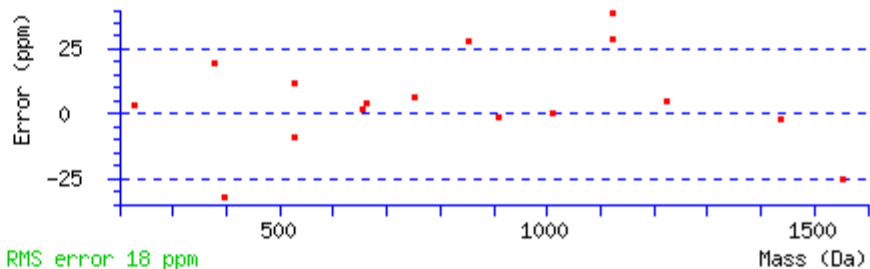

NCBI BLAST search of [LDITTLTGVP EEHIK](#)

(Parameters: blastp, nr protein database, expect=20000, no filter, PAM30)

Other BLAST [web gateways](#)

## All matches to this query

| Score | Mr(calc):   | Delta    | Sequence                          |
|-------|-------------|----------|-----------------------------------|
| 82.9  | 1664.898499 | 0.001943 | <a href="#">LDITTLTGVP EEHIK</a>  |
| 26.1  | 1664.884598 | 0.015844 | <a href="#">VEQGPPGGIGTAAVRPK</a> |
| 21.1  | 1664.884598 | 0.015844 | <a href="#">VEQGPPGGIGTAAVRPK</a> |
| 6.0   | 1664.898499 | 0.001943 | <a href="#">KPPTGGLPPSKEPLK</a>   |
| 0.2   | 1664.895828 | 0.004614 | <a href="#">GPRGTVAPATPTKPQR</a>  |

Mascot: <http://www.matrixscience.com/>

# **MATRIX** SCIENCE Mascot Search Results

## Peptide View

MS/MS Fragmentation of **WAIIEEFTK**

Found in **NU2M\_HUMAN**, NADH-ubiquinone oxidoreductase chain 2 OS=Homo sapiens GN=MT-ND2 PE=1 SV=2

Match to Query 25400: 1135.589728 from(568.802140,2+) rtinseconds(3425) index(48305)

Title: Locus:1.1.1.2640.11

Data file 2011-11-10 - TFD - EP 4-1.mgf

Click mouse within plot area to zoom in by factor of two about that point

Or, Plot from  to  Da

Label all possible matches  Label matches used for scoring

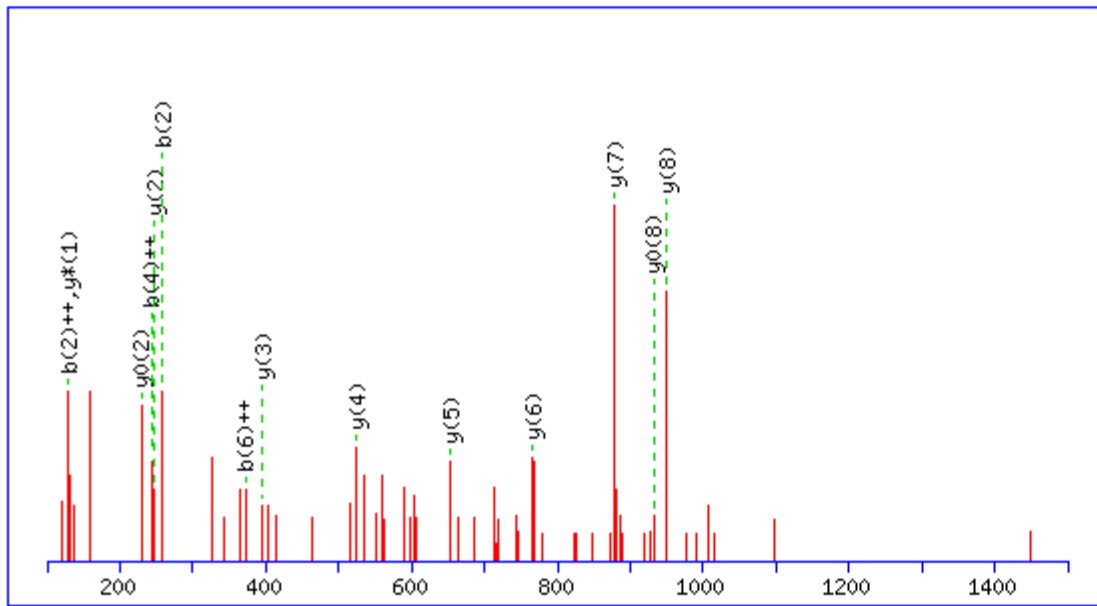

Monoisotopic mass of neutral peptide Mr(calc): 1135.591339

Fixed modifications: Propionamide (C) (apply to specified residues or termini only)

Ions Score: 33 Expect: 0.0014

Matches : 14/70 fragment ions using 36 most intense peaks [\(help\)](#)

| # | b          | b <sup>++</sup> | b <sup>0</sup> | b <sup>0++</sup> | Seq. | y          | y <sup>++</sup> | y <sup>*</sup> | y <sup>*++</sup> | y <sup>0</sup> | y <sup>0++</sup> | # |
|---|------------|-----------------|----------------|------------------|------|------------|-----------------|----------------|------------------|----------------|------------------|---|
| 1 | 187.086589 | 94.046932       |                |                  | W    |            |                 |                |                  |                |                  | 9 |
| 2 | 258.123703 | 129.565490      |                |                  | A    | 950.519325 | 475.763301      | 933.492776     | 467.250026       | 932.508760     | 466.758018       | 8 |
| 3 | 371.207767 | 186.107522      |                |                  | I    | 879.482211 | 440.244744      | 862.455662     | 431.731469       | 861.471646     | 431.239461       | 7 |
| 4 | 484.291831 | 242.649554      |                |                  | I    | 766.398147 | 383.702712      | 749.371598     | 375.189437       | 748.387582     | 374.697429       | 6 |
| 5 | 613.334424 | 307.170850      | 595.323859     | 298.165568       | E    | 653.314083 | 327.160680      | 636.287534     | 318.647405       | 635.303518     | 318.155397       | 5 |
| 6 | 742.377017 | 371.692147      | 724.366452     | 362.686864       | E    | 524.271490 | 262.639383      | 507.244941     | 254.126109       | 506.260925     | 253.634101       | 4 |
| 7 | 889.445431 | 445.226354      | 871.434866     | 436.221071       | F    | 395.228897 | 198.118086      | 378.202348     | 189.604812       | 377.218332     | 189.112804       | 3 |
| 8 | 990.493110 | 495.750193      | 972.482545     | 486.744911       | T    | 248.160483 | 124.583879      | 231.133934     | 116.070605       | 230.149918     | 115.578597       | 2 |
| 9 |            |                 |                |                  | K    | 147.112804 | 74.060040       | 130.086255     | 65.546765        |                |                  | 1 |

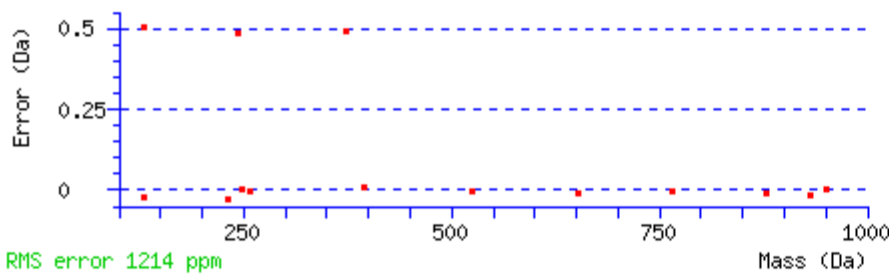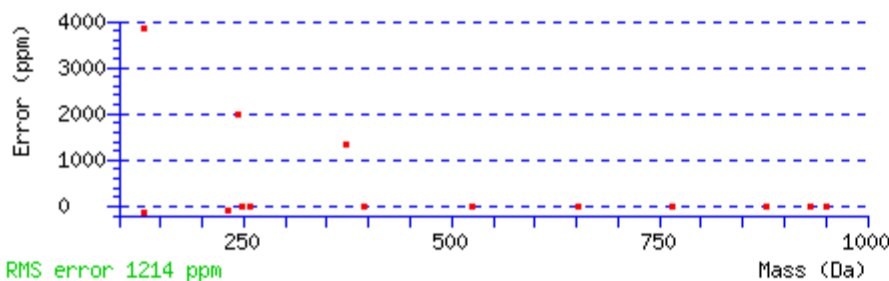

NCBI BLAST search of [WAIIEEFTK](#)

(Parameters: blastp, nr protein database, expect=20000, no filter, PAM30)

Other BLAST [web gateways](#)

## All matches to this query

| Score | Mr(calc):   | Delta     | Sequence                  |
|-------|-------------|-----------|---------------------------|
| 32.8  | 1135.591339 | -0.001611 | <a href="#">WAIIEEFTK</a> |
| 2.2   | 1135.587311 | 0.002417  | <a href="#">KQINDYVEK</a> |

# MASCOT SCIENCE Mascot Search Results

## Peptide View

### MS/MS Fragmentation of **IYEGEGSGLIR**

Found in **NU6M\_HUMAN**, NADH-ubiquinone oxidoreductase chain 6 OS=Homo sapiens GN=MT-ND6 PE=1 SV=2

Match to Query 512406: 1192.607368 from(597.310960,2+) rtinseconds(2040) index(916616)

Title: Locus:1.1.1.1177.42

Data file C:\Program Files (x86)\Matrix Science\Mascot Daemon\mgf\3 TFD - Epitel - R2\mascot\_daemon\_merge.mgf

Click mouse within plot area to zoom in by factor of two about that point

Or, Plot from  to  Da

Label all possible matches  Label matches used for scoring

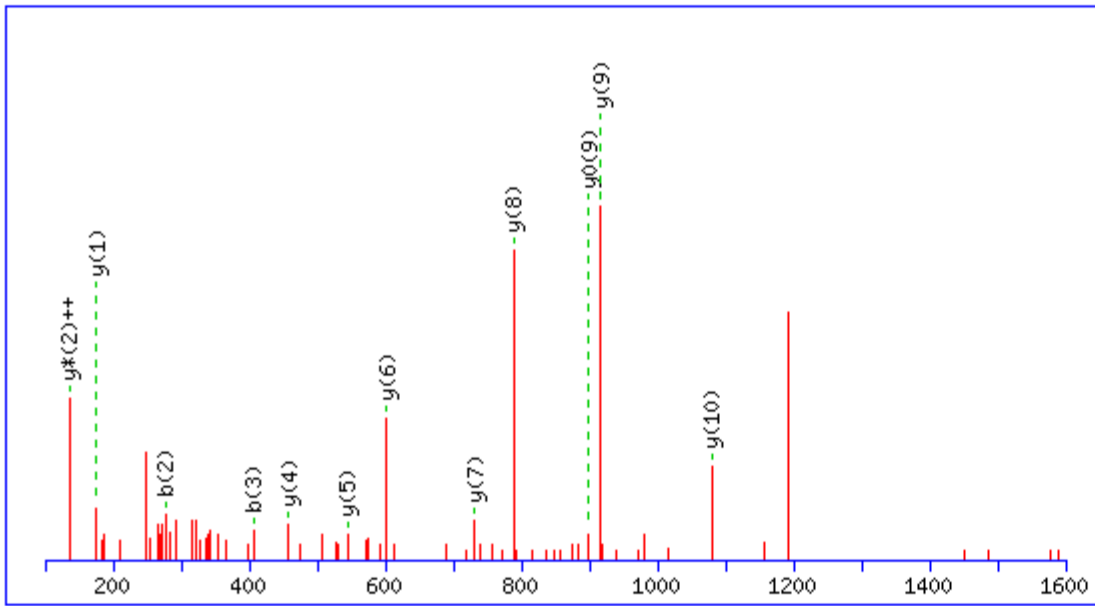

Monoisotopic mass of neutral peptide Mr(calc): 1192.608780

Fixed modifications: Carbamidomethyl (C) (apply to specified residues or termini only)

Ions Score: 62 Expect: 3.7e-006

Matches : 12/88 fragment ions using 21 most intense peaks ([help](#))

| #  | b                 | b <sup>++</sup> | b <sup>0</sup> | b <sup>0++</sup> | Seq. | y                  | y <sup>++</sup> | y <sup>*</sup> | y <sup>*++</sup>  | y <sup>0</sup>    | y <sup>0++</sup> | #  |
|----|-------------------|-----------------|----------------|------------------|------|--------------------|-----------------|----------------|-------------------|-------------------|------------------|----|
| 1  | 114.091340        | 57.549308       |                |                  | I    |                    |                 |                |                   |                   |                  | 11 |
| 2  | <b>277.154669</b> | 139.080973      |                |                  | Y    | <b>1080.532015</b> | 540.769646      | 1063.505466    | 532.256371        | 1062.521450       | 531.764363       | 10 |
| 3  | <b>406.197262</b> | 203.602269      | 388.186697     | 194.596987       | E    | <b>917.468686</b>  | 459.237981      | 900.442137     | 450.724707        | <b>899.458121</b> | 450.232699       | 9  |
| 4  | 463.218726        | 232.113001      | 445.208161     | 223.107719       | G    | <b>788.426093</b>  | 394.716685      | 771.399544     | 386.203410        | 770.415528        | 385.711402       | 8  |
| 5  | 592.261319        | 296.634298      | 574.250754     | 287.629015       | E    | <b>731.404629</b>  | 366.205953      | 714.378080     | 357.692678        | 713.394064        | 357.200670       | 7  |
| 6  | 649.282783        | 325.145030      | 631.272218     | 316.139747       | G    | <b>602.362036</b>  | 301.684656      | 585.335487     | 293.171382        | 584.351471        | 292.679374       | 6  |
| 7  | 736.314811        | 368.661044      | 718.304246     | 359.655761       | S    | <b>545.340572</b>  | 273.173924      | 528.314023     | 264.660650        | 527.330007        | 264.168642       | 5  |
| 8  | 793.336275        | 397.171776      | 775.325710     | 388.166493       | G    | <b>458.308544</b>  | 229.657910      | 441.281995     | 221.144635        |                   |                  | 4  |
| 9  | 906.420339        | 453.713808      | 888.409774     | 444.708525       | L    | 401.287080         | 201.147178      | 384.260531     | 192.633903        |                   |                  | 3  |
| 10 | 1019.504403       | 510.255840      | 1001.493838    | 501.250557       | I    | 288.203016         | 144.605146      | 271.176467     | <b>136.091871</b> |                   |                  | 2  |
| 11 |                   |                 |                |                  | R    | <b>175.118952</b>  | 88.063114       | 158.092403     | 79.549839         |                   |                  | 1  |

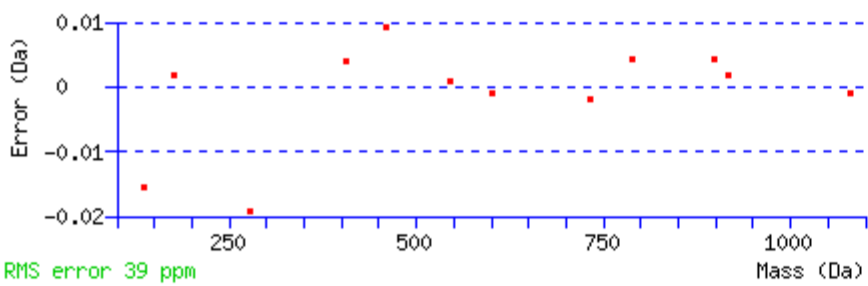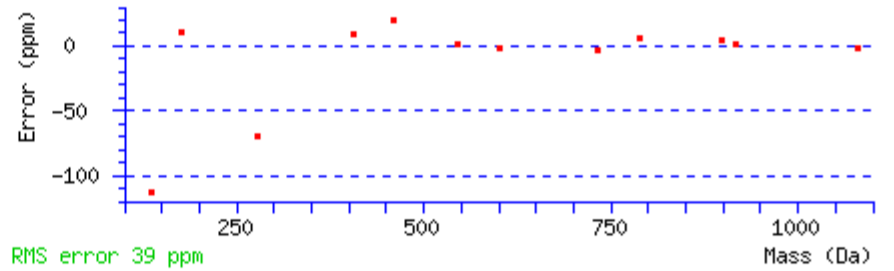

### NCBI BLAST search of **IYEGEGSGLIR**

(Parameters: blastp, nr protein database, expect=20000, no filter, PAM30)

Other BLAST [web gateways](#)

### All matches to this query

| Score | Mr(calc):   | Delta     | Sequence                     |
|-------|-------------|-----------|------------------------------|
| 62.4  | 1192.608780 | -0.001412 | <a href="#">IYEGEGSGLIR</a>  |
| 4.3   | 1192.612167 | -0.004799 | <a href="#">VLVSSEMGISR</a>  |
| 2.8   | 1192.612152 | -0.004784 | <a href="#">TIAASASSVKQM</a> |
| 0.6   | 1192.608795 | -0.001427 | <a href="#">VSRTPPYEPK</a>   |

Mascot: <http://www.matrixscience.com/>

# Mascot Search Results

## Peptide View

MS/MS Fragmentation of **TATEKPGPAEAAR**

Found in **ADRO\_HUMAN**, NADPH:adrenodoxin oxidoreductase, mitochondrial OS=Homo sapiens GN=FDXR PE=1 SV=3

Match to Query 638448: 1297.659192 from(433.560340,3+) rtinseconds(761) index(324997)

Title: Locus:1.1.1.621.4

Data file C:\Program Files (x86)\Matrix Science\Mascot Daemon\mgf\3 TFD - Epitel - R2\mascot\_daemon\_merge.mgf

Click mouse within plot area to zoom in by factor of two about that point

Or, Plot from  to  Da

Label all possible matches  Label matches used for scoring

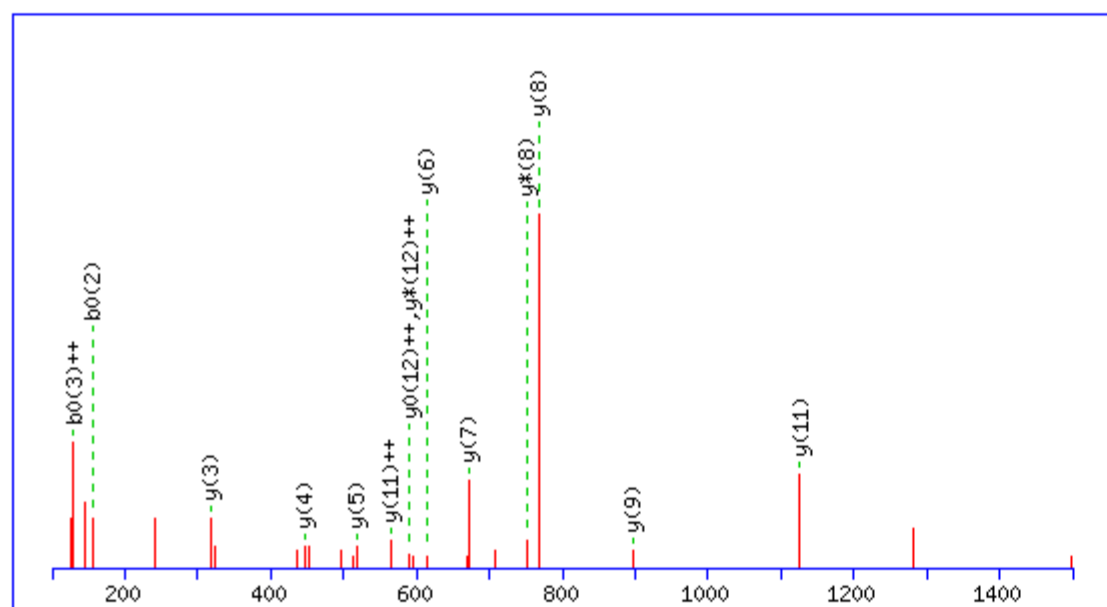

Monoisotopic mass of neutral peptide Mr(calc): 1297.662598

Fixed modifications: Carbamidomethyl (C) (apply to specified residues or termini only)

Ions Score: 50 Expect: 2.9e-005

Matches : 14/130 fragment ions using 23 most intense peaks [\(help\)](#)

| #  | b           | b <sup>++</sup> | b <sup>*</sup> | b <sup>*++</sup> | b <sup>0</sup> | b <sup>0++</sup> | Seq. | y           | y <sup>++</sup> | y <sup>*</sup> | y <sup>*++</sup> | y <sup>0</sup> | y <sup>0++</sup> | #  |
|----|-------------|-----------------|----------------|------------------|----------------|------------------|------|-------------|-----------------|----------------|------------------|----------------|------------------|----|
| 1  | 102.054955  | 51.531116       |                |                  | 84.044390      | 42.525833        | T    |             |                 |                |                  |                |                  | 13 |
| 2  | 173.092069  | 87.049672       |                |                  | 155.081504     | 78.044390        | A    | 1197.622228 | 599.314752      | 1180.595679    | 590.801478       | 1179.611663    | 590.309470       | 12 |
| 3  | 274.139748  | 137.573512      |                |                  | 256.129183     | 128.568230       | T    | 1126.585114 | 563.796195      | 1109.558565    | 555.282921       | 1108.574549    | 554.790913       | 11 |
| 4  | 403.182341  | 202.094809      |                |                  | 385.171776     | 193.089526       | E    | 1025.537435 | 513.272356      | 1008.510886    | 504.759081       | 1007.526870    | 504.267073       | 10 |
| 5  | 531.277304  | 266.142290      | 514.250755     | 257.629016       | 513.266739     | 257.137008       | K    | 896.494842  | 448.751059      | 879.468293     | 440.237785       | 878.484277     | 439.745777       | 9  |
| 6  | 628.330068  | 314.668672      | 611.303519     | 306.155398       | 610.319503     | 305.663390       | P    | 768.399879  | 384.703578      | 751.373330     | 376.190303       | 750.389314     | 375.698295       | 8  |
| 7  | 685.351532  | 343.179404      | 668.324983     | 334.666130       | 667.340967     | 334.174122       | G    | 671.347115  | 336.177196      | 654.320566     | 327.663921       | 653.336550     | 327.171913       | 7  |
| 8  | 782.404296  | 391.705786      | 765.377747     | 383.192512       | 764.393731     | 382.700504       | P    | 614.325651  | 307.666464      | 597.299102     | 299.153189       | 596.315086     | 298.661181       | 6  |
| 9  | 853.441410  | 427.224343      | 836.414861     | 418.711069       | 835.430845     | 418.219061       | A    | 517.272887  | 259.140082      | 500.246338     | 250.626807       | 499.262322     | 250.134799       | 5  |
| 10 | 982.484003  | 491.745640      | 965.457454     | 483.232365       | 964.473438     | 482.740357       | E    | 446.235773  | 223.621524      | 429.209224     | 215.108250       | 428.225208     | 214.616242       | 4  |
| 11 | 1053.521117 | 527.264197      | 1036.494568    | 518.750922       | 1035.510552    | 518.258914       | A    | 317.193180  | 159.100228      | 300.166631     | 150.586953       |                |                  | 3  |
| 12 | 1124.558231 | 562.782754      | 1107.531682    | 554.269479       | 1106.547666    | 553.777471       | A    | 246.156066  | 123.581671      | 229.129517     | 115.068396       |                |                  | 2  |
| 13 |             |                 |                |                  |                |                  | R    | 175.118952  | 88.063114       | 158.092403     | 79.549839        |                |                  | 1  |

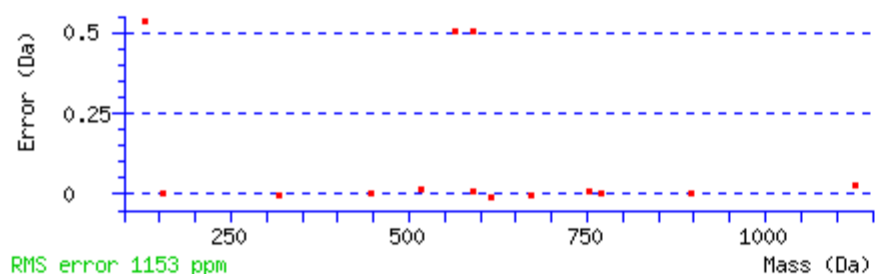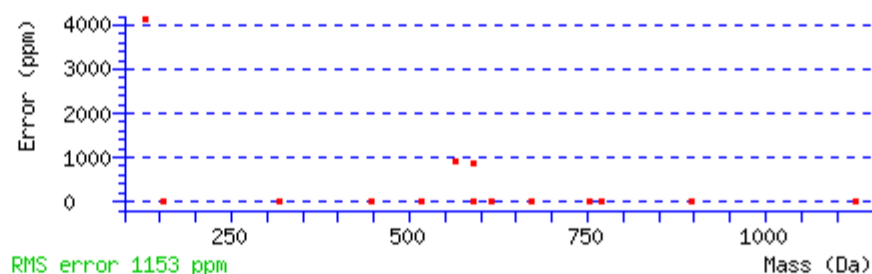

NCBI BLAST search of [TATEKPGPAEAAR](#)

(Parameters: blastp, nr protein database, expect=20000, no filter, PAM30)

Other BLAST [web gateways](#)

All matches to this query

| Score | Mr(calc):   | Delta     | Sequence                      |
|-------|-------------|-----------|-------------------------------|
| 49.9  | 1297.662598 | -0.003406 | <a href="#">TATEKPGPAEAAR</a> |
| 1.6   | 1297.662598 | -0.003406 | <a href="#">EDANKPIQEV</a>    |

Mascot: <http://www.matrixscience.com/>



# MASCOT SEARCH RESULTS

## Peptide View

### MS/MS Fragmentation of LEDAADVYR

Found in **NAA15\_HUMAN**, N-alpha-acetyltransferase 15, NatA auxiliary subunit OS=Homo sapiens GN=NAA15 PE=1 SV=1

Match to Query 20258: 1050.498768 from(526.256660,2+) rtinseconds(1665) index(15438)

Title: Locus:1.1.1.2128.28

Data file 2011-11-10 - TFD - EP 4-2.mgf

Click mouse within plot area to zoom in by factor of two about that point

Or, Plot from  to  Da

Label all possible matches  Label matches used for scoring

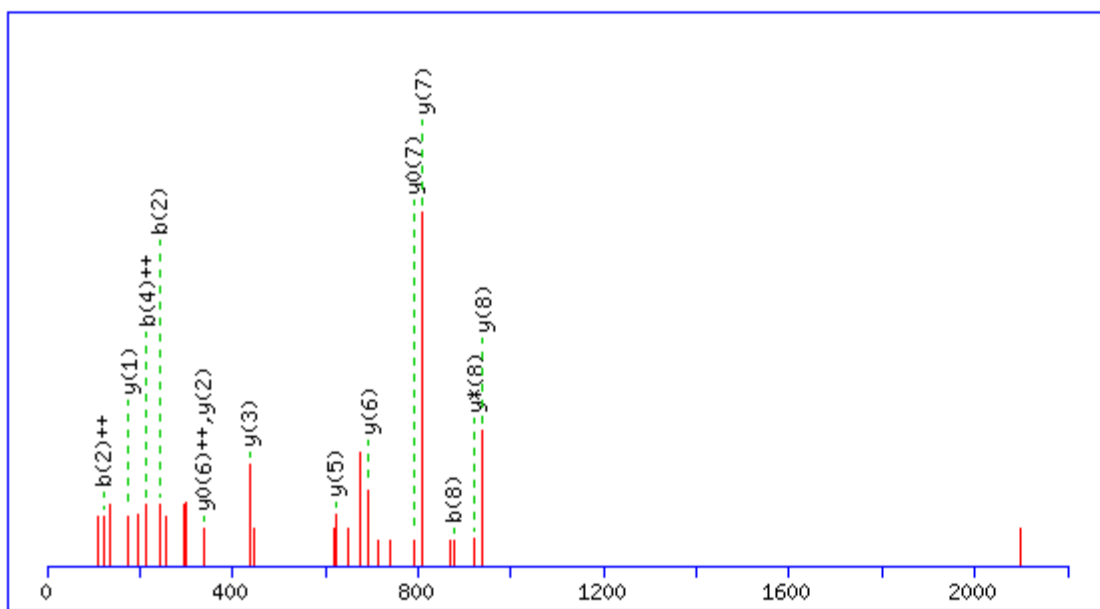

Monoisotopic mass of neutral peptide Mr(calc): 1050.498169

Fixed modifications: Propionamide (C) (apply to specified residues or termini only)

Ions Score: 44 Expect: 0.0003

Matches : 14/72 fragment ions using 28 most intense peaks [\(help\)](#)

| # | b          | b <sup>++</sup> | b <sup>0</sup> | b <sup>0++</sup> | Seq. | y          | y <sup>++</sup> | y <sup>*</sup> | y <sup>*++</sup> | y <sup>0</sup> | y <sup>0++</sup> | # |
|---|------------|-----------------|----------------|------------------|------|------------|-----------------|----------------|------------------|----------------|------------------|---|
| 1 | 114.091340 | 57.549308       |                |                  | L    |            |                 |                |                  |                |                  | 9 |
| 2 | 243.133933 | 122.070605      | 225.123368     | 113.065322       | E    | 938.421402 | 469.714339      | 921.394853     | 461.201065       | 920.410837     | 460.709057       | 8 |
| 3 | 358.160876 | 179.584076      | 340.150311     | 170.578794       | D    | 809.378809 | 405.193043      | 792.352260     | 396.679768       | 791.368244     | 396.187760       | 7 |
| 4 | 429.197990 | 215.102633      | 411.187425     | 206.097351       | A    | 694.351866 | 347.679571      | 677.325317     | 339.166296       | 676.341301     | 338.674288       | 6 |
| 5 | 500.235104 | 250.621190      | 482.224539     | 241.615908       | A    | 623.314752 | 312.161014      | 606.288203     | 303.647740       | 605.304187     | 303.155732       | 5 |
| 6 | 615.262047 | 308.134662      | 597.251482     | 299.129379       | D    | 552.277638 | 276.642457      | 535.251089     | 268.129183       | 534.267073     | 267.637175       | 4 |
| 7 | 714.330461 | 357.668869      | 696.319896     | 348.663586       | V    | 437.250695 | 219.128985      | 420.224146     | 210.615711       |                |                  | 3 |
| 8 | 877.393790 | 439.200533      | 859.383225     | 430.195251       | Y    | 338.182281 | 169.594778      | 321.155732     | 161.081504       |                |                  | 2 |
| 9 |            |                 |                |                  | R    | 175.118952 | 88.063114       | 158.092403     | 79.549839        |                |                  | 1 |

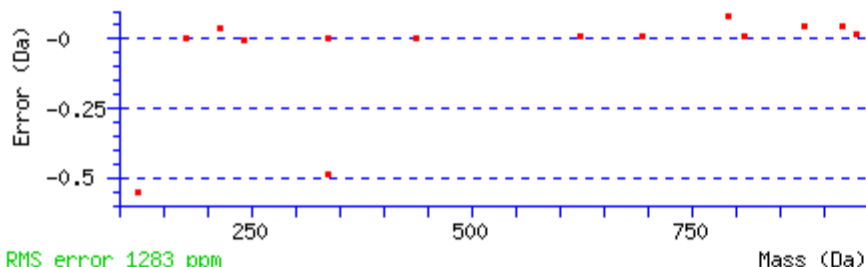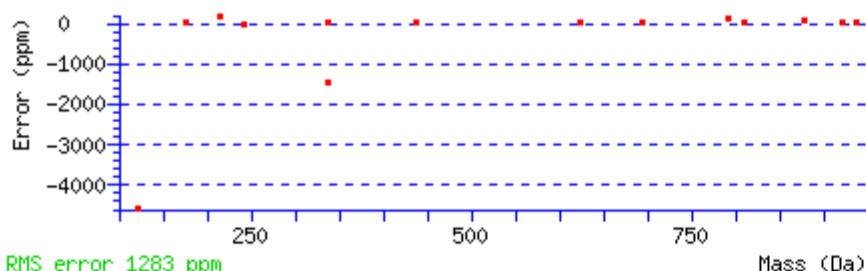

### NCBI BLAST search of LEDAADVYR

(Parameters: blastp, nr protein database, expect=20000, no filter, PAM30)

Other BLAST [web gateways](#)

### All matches to this query

| Score | Mr(calc):   | Delta    | Sequence                  |
|-------|-------------|----------|---------------------------|
| 44.3  | 1050.498169 | 0.000599 | <a href="#">LEDAADVYR</a> |

# Mascot Search Results

## Peptide View

MS/MS Fragmentation of **KDLENEIK**

Found in **NEBL\_HUMAN**, Nebulette OS=Homo sapiens GN=NEBL PE=2 SV=1

Match to Query 18770: 987.533168 from(494.773860,2+) rtinseconds(1223) index(6174)

Title: Locus:1.1.1.1720.26

Data file 2011-11-10 - TFD - EP 4-6.mgf

Click mouse within plot area to zoom in by factor of two about that point

Or, Plot from  to  Da

Label all possible matches  Label matches used for scoring

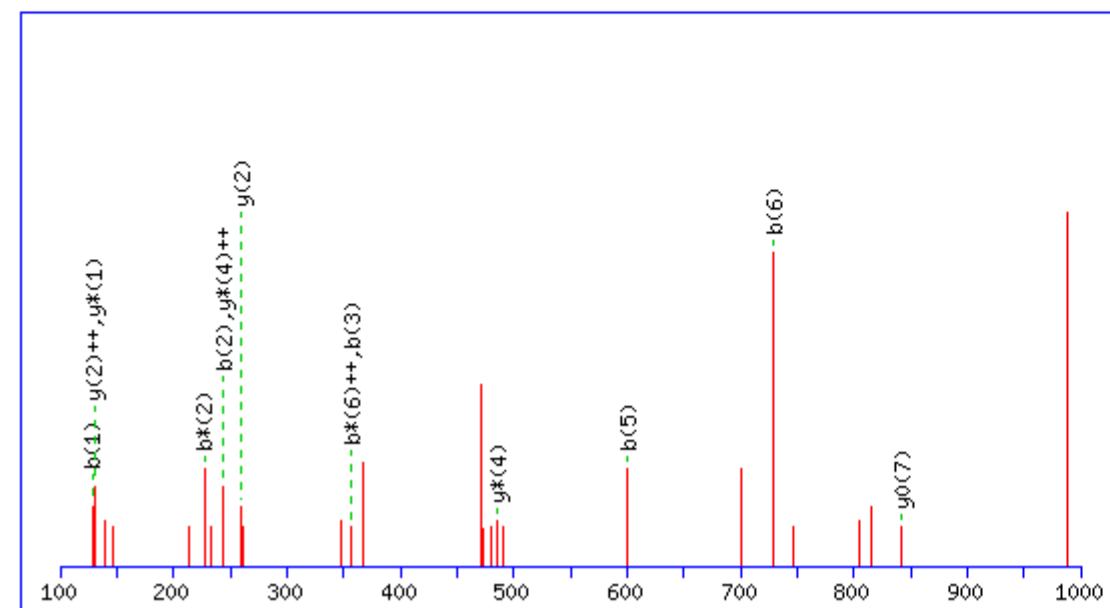

Monoisotopic mass of neutral peptide Mr(calc): 987.523636

Fixed modifications: Propionamide (C) (apply to specified residues or termini only)

Ions Score: 48 Expect: 0.00037

Matches : 16/78 fragment ions using 18 most intense peaks [\(help\)](#)

| # | b                 | b <sup>++</sup>   | b <sup>*</sup>    | b <sup>***</sup>  | b <sup>0</sup> | b <sup>0++</sup> | Seq.     | y                 | y <sup>++</sup>   | y <sup>*</sup>    | y <sup>***</sup>  | y <sup>0</sup>    | y <sup>0++</sup> | #        |
|---|-------------------|-------------------|-------------------|-------------------|----------------|------------------|----------|-------------------|-------------------|-------------------|-------------------|-------------------|------------------|----------|
| 1 | <b>129.102239</b> | 65.054757         | 112.075690        | 56.541483         |                |                  | <b>K</b> |                   |                   |                   |                   |                   |                  | <b>8</b> |
| 2 | <b>244.129182</b> | 122.568229        | <b>227.102633</b> | 114.054955        | 226.118617     | 113.562947       | <b>D</b> | 860.435988        | 430.721632        | 843.409439        | 422.208358        | <b>842.425423</b> | 421.716350       | <b>7</b> |
| 3 | <b>357.213246</b> | 179.110261        | 340.186697        | 170.596987        | 339.202681     | 170.104979       | <b>L</b> | 745.409045        | 373.208161        | 728.382496        | 364.694886        | 727.398480        | 364.202878       | <b>6</b> |
| 4 | <b>486.255839</b> | <b>243.631558</b> | 469.229290        | 235.118283        | 468.245274     | 234.626275       | <b>E</b> | 632.324981        | 316.666129        | 615.298432        | 308.152854        | 614.314416        | 307.660846       | <b>5</b> |
| 5 | <b>600.298766</b> | 300.653021        | 583.272217        | 292.139747        | 582.288201     | 291.647739       | <b>N</b> | 503.282388        | 252.144832        | <b>486.255839</b> | <b>243.631558</b> | 485.271823        | 243.139550       | <b>4</b> |
| 6 | <b>729.341359</b> | 365.174318        | 712.314810        | <b>356.661043</b> | 711.330794     | 356.169035       | <b>E</b> | 389.239461        | 195.123369        | 372.212912        | 186.610094        | 371.228896        | 186.118086       | <b>3</b> |
| 7 | <b>842.425423</b> | 421.716350        | 825.398874        | 413.203075        | 824.414858     | 412.711067       | <b>I</b> | <b>260.196868</b> | <b>130.602072</b> | 243.170319        | 122.088798        |                   |                  | <b>2</b> |
| 8 |                   |                   |                   |                   |                |                  | <b>K</b> | 147.112804        | 74.060040         | <b>130.086255</b> | 65.546765         |                   |                  | <b>1</b> |

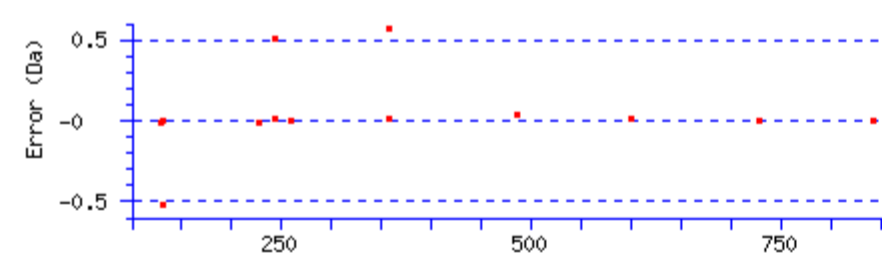

RMS error 1295 ppm

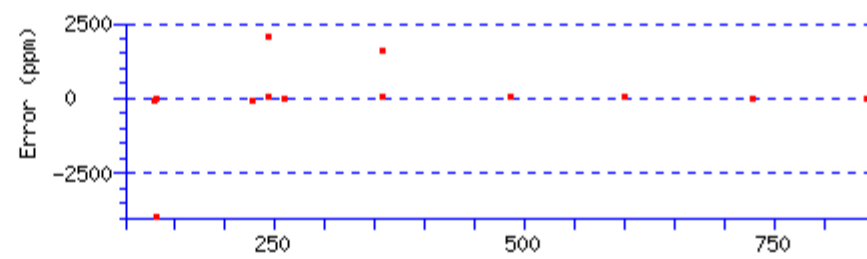

RMS error 1295 ppm

NCBI BLAST search of **KDLENEIK**

(Parameters: blastp, nr protein database, expect=20000, no filter, PAM30)

Other BLAST [web gateways](#)

All matches to this query

| Score | Mr(calc):  | Delta     | Sequence                  |
|-------|------------|-----------|---------------------------|
| 47.5  | 987.523636 | 0.009532  | <a href="#">KDLENEIK</a>  |
| 41.7  | 987.534882 | -0.001714 | <a href="#">SRLDQELK</a>  |
| 33.5  | 987.534866 | -0.001698 | <a href="#">ENLESRLK</a>  |
| 26.1  | 987.523651 | 0.009517  | <a href="#">DKLQDELK</a>  |
| 19.9  | 987.534897 | -0.001729 | <a href="#">KPRTEPK</a>   |
| 19.8  | 987.538925 | -0.005757 | <a href="#">TWKTDLPK</a>  |
| 17.8  | 987.523651 | 0.009517  | <a href="#">DQEIKDLK</a>  |
| 16.3  | 987.534882 | -0.001714 | <a href="#">EDLKNTLR</a>  |
| 15.9  | 987.523666 | 0.009502  | <a href="#">KDPSSVDIK</a> |
| 15.6  | 987.534882 | -0.001714 | <a href="#">DRPSKLEK</a>  |

# MASCOT Search Results

## Peptide View

MS/MS Fragmentation of **TTPATGEQSPGAR**

Found in **WWP2\_HUMAN**, NEDD4-like E3 ubiquitin-protein ligase WWP2 OS=Homo sapiens GN=WWP2 PE=1 SV=2

Match to Query 606718: 1271.611088 from(636.812820,2+) rtinseconds(841) index(240821)

Title: Locus:1.1.1.759.37

Data file C:\Program Files (x86)\Matrix Science\Mascot Daemon\mgf3 TFD - Epitel - R2\mascot\_daemon\_merge.mgf

Click mouse within plot area to zoom in by factor of two about that point

Or, Plot from  to  Da

Label all possible matches  Label matches used for scoring

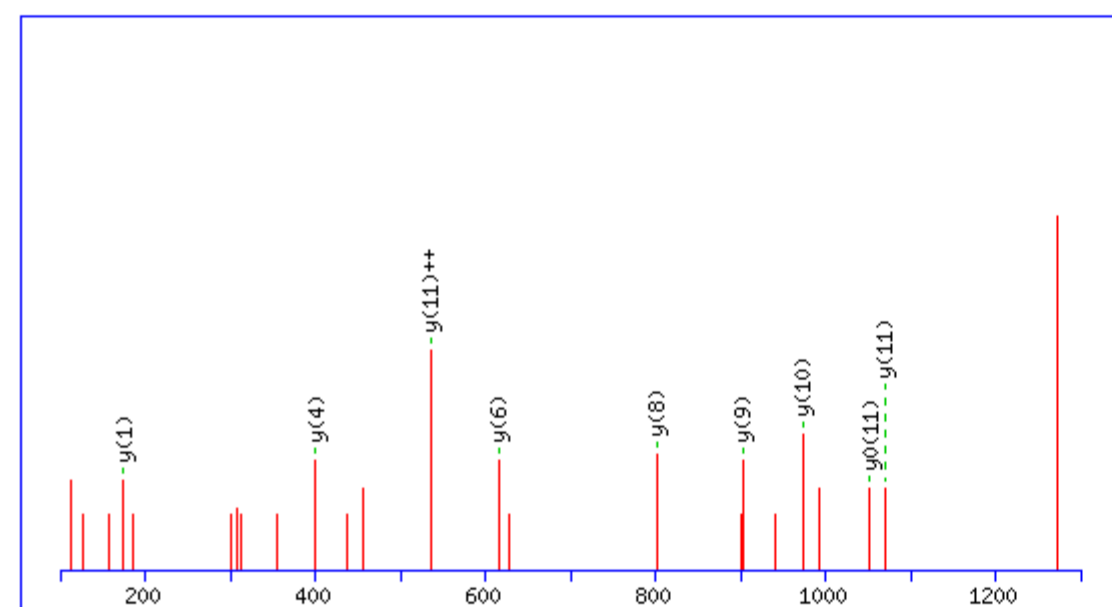

Monoisotopic mass of neutral peptide Mr(calc): 1271.610596

Fixed modifications: Carbamidomethyl (C) (apply to specified residues or termini only)

Ions Score: 42 Expect: 0.00082

Matches : 9/122 fragment ions using 19 most intense peaks [\(help\)](#)

| #  | b           | b <sup>++</sup> | b <sup>*</sup> | b <sup>*++</sup> | b <sup>0</sup> | b <sup>0++</sup> | Seq. | y                  | y <sup>++</sup>   | y <sup>*</sup> | y <sup>*++</sup> | y <sup>0</sup>     | y <sup>0++</sup> | #  |
|----|-------------|-----------------|----------------|------------------|----------------|------------------|------|--------------------|-------------------|----------------|------------------|--------------------|------------------|----|
| 1  | 102.054955  | 51.531116       |                |                  | 84.044390      | 42.525833        | T    |                    |                   |                |                  |                    |                  | 13 |
| 2  | 203.102634  | 102.054955      |                |                  | 185.092069     | 93.049672        | T    | 1171.570193        | 586.288735        | 1154.543644    | 577.775460       | 1153.559628        | 577.283452       | 12 |
| 3  | 300.155398  | 150.581337      |                |                  | 282.144833     | 141.576055       | P    | <b>1070.522514</b> | <b>535.764895</b> | 1053.495965    | 527.251621       | <b>1052.511949</b> | 526.759613       | 11 |
| 4  | 371.192512  | 186.099894      |                |                  | 353.181947     | 177.094612       | A    | <b>973.469750</b>  | 487.238513        | 956.443201     | 478.725238       | 955.459185         | 478.233230       | 10 |
| 5  | 472.240191  | 236.623734      |                |                  | 454.229626     | 227.618451       | T    | <b>902.432636</b>  | 451.719956        | 885.406087     | 443.206682       | 884.422071         | 442.714674       | 9  |
| 6  | 529.261655  | 265.134466      |                |                  | 511.251090     | 256.129183       | G    | <b>801.384957</b>  | 401.196117        | 784.358408     | 392.682842       | 783.374392         | 392.190834       | 8  |
| 7  | 658.304248  | 329.655762      |                |                  | 640.293683     | 320.650480       | E    | 744.363493         | 372.685385        | 727.336944     | 364.172110       | 726.352928         | 363.680102       | 7  |
| 8  | 786.362826  | 393.685051      | 769.336277     | 385.171777       | 768.352261     | 384.679769       | Q    | <b>615.320900</b>  | 308.164088        | 598.294351     | 299.650813       | 597.310335         | 299.158805       | 6  |
| 9  | 873.394854  | 437.201065      | 856.368305     | 428.687791       | 855.384289     | 428.195783       | S    | 487.262322         | 244.134799        | 470.235773     | 235.621524       | 469.251757         | 235.129516       | 5  |
| 10 | 970.447618  | 485.727447      | 953.421069     | 477.214173       | 952.437053     | 476.722165       | P    | <b>400.230294</b>  | 200.618785        | 383.203745     | 192.105510       |                    |                  | 4  |
| 11 | 1027.469082 | 514.238179      | 1010.442533    | 505.724905       | 1009.458517    | 505.232897       | G    | 303.177530         | 152.092403        | 286.150981     | 143.579128       |                    |                  | 3  |
| 12 | 1098.506196 | 549.756736      | 1081.479647    | 541.243462       | 1080.495631    | 540.751454       | A    | 246.156066         | 123.581671        | 229.129517     | 115.068396       |                    |                  | 2  |
| 13 |             |                 |                |                  |                |                  | R    | <b>175.118952</b>  | 88.063114         | 158.092403     | 79.549839        |                    |                  | 1  |

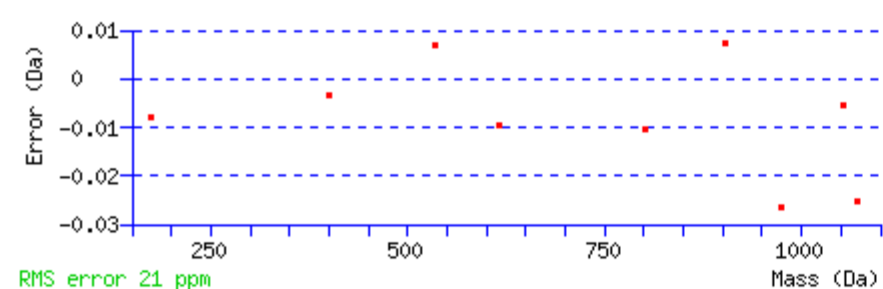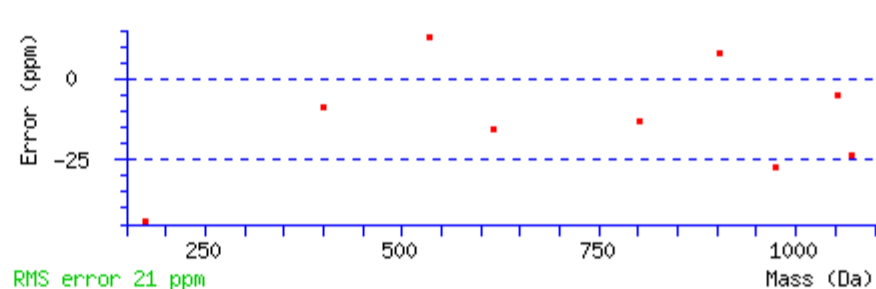

NCBI BLAST search of **TTPATGEQSPGAR**

(Parameters: blastp, nr protein database, expect=20000, no filter, PAM30)

Other BLAST [web gateways](#)

## All matches to this query

| Score | Mr(calc):   | Delta     | Sequence                      |
|-------|-------------|-----------|-------------------------------|
| 41.6  | 1271.610596 | 0.000492  | <a href="#">TTPATGEQSPGAR</a> |
| 8.2   | 1271.606750 | 0.004338  | <a href="#">SDPVPAMTTPEK</a>  |
| 3.9   | 1271.617966 | -0.006878 | <a href="#">MAPPLPSEINR</a>   |
| 1.2   | 1271.621826 | -0.010738 | <a href="#">GGSDASQVPNGKR</a> |

Mascot: <http://www.matrixscience.com/>

# MASCOT SCIENCE Mascot Search Results

## Peptide View

MS/MS Fragmentation of **SPAITATLEGK**

Found in **UBA3\_HUMAN**, NEDD8-activating enzyme E1 catalytic subunit OS=Homo sapiens GN=UBA3 PE=1 SV=2

Match to Query 15076: 1086.593908 from(544.304230,2+) rtinseconds(1852) index(19360)

Title: Locus:1.1.1.2220.23

Data file 2011-11-12 - TFD - EP 5-3.mgf

Click mouse within plot area to zoom in by factor of two about that point

Or, Plot from  to  Da

Label all possible matches  Label matches used for scoring

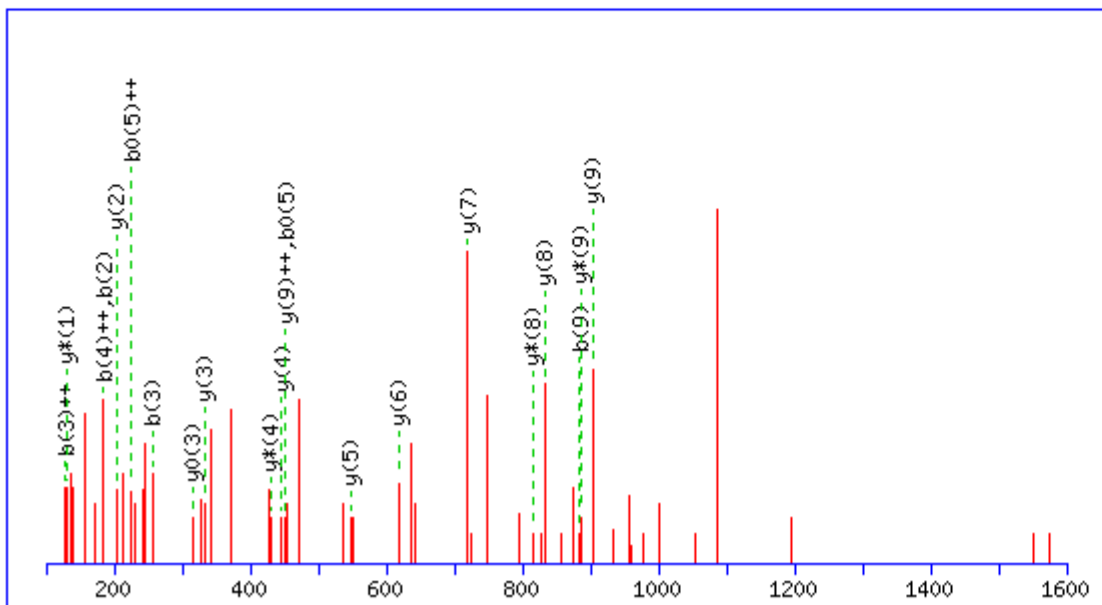

Monoisotopic mass of neutral peptide Mr(calc): 1086.592072

Fixed modifications: Propionamide (C) (apply to specified residues or termini only)

Ions Score: 37 Expect: 0.0011

Matches : 21/96 fragment ions using 49 most intense peaks [\(help\)](#)

| #  | b                 | b <sup>++</sup>   | b <sup>0</sup>    | b <sup>0++</sup>  | Seq. | y                 | y <sup>++</sup>   | y <sup>*</sup>    | y <sup>*++</sup> | y <sup>0</sup>    | y <sup>0++</sup> | #  |
|----|-------------------|-------------------|-------------------|-------------------|------|-------------------|-------------------|-------------------|------------------|-------------------|------------------|----|
| 1  | 88.039304         | 44.523290         | 70.028739         | 35.518008         | S    |                   |                   |                   |                  |                   |                  | 11 |
| 2  | <b>185.092068</b> | 93.049672         | 167.081503        | 84.044389         | P    | 1000.567339       | 500.787308        | 983.540790        | 492.274033       | 982.556774        | 491.782025       | 10 |
| 3  | <b>256.129182</b> | <b>128.568229</b> | 238.118617        | 119.562947        | A    | <b>903.514575</b> | <b>452.260926</b> | <b>886.488026</b> | 443.747651       | 885.504010        | 443.255643       | 9  |
| 4  | 369.213246        | <b>185.110261</b> | 351.202681        | 176.104978        | I    | <b>832.477461</b> | 416.742369        | <b>815.450912</b> | 408.229094       | 814.466896        | 407.737086       | 8  |
| 5  | 470.260925        | 235.634100        | <b>452.250360</b> | <b>226.628818</b> | T    | <b>719.393397</b> | 360.200337        | 702.366848        | 351.687062       | 701.382832        | 351.195054       | 7  |
| 6  | 541.298039        | 271.152658        | 523.287474        | 262.147375        | A    | <b>618.345718</b> | 309.676497        | 601.319169        | 301.163223       | 600.335153        | 300.671215       | 6  |
| 7  | 642.345718        | 321.676497        | 624.335153        | 312.671215        | T    | <b>547.308604</b> | 274.157940        | 530.282055        | 265.644666       | 529.298039        | 265.152658       | 5  |
| 8  | 755.429782        | 378.218529        | 737.419217        | 369.213247        | L    | <b>446.260925</b> | 223.634100        | <b>429.234376</b> | 215.120826       | 428.250360        | 214.628818       | 4  |
| 9  | <b>884.472375</b> | 442.739826        | 866.461810        | 433.734543        | E    | <b>333.176861</b> | 167.092068        | 316.150312        | 158.578794       | <b>315.166296</b> | 158.086786       | 3  |
| 10 | 941.493839        | 471.250558        | 923.483274        | 462.245275        | G    | <b>204.134268</b> | 102.570772        | 187.107719        | 94.057497        |                   |                  | 2  |
| 11 |                   |                   |                   |                   | K    | 147.112804        | 74.060040         | <b>130.086255</b> | 65.546765        |                   |                  | 1  |

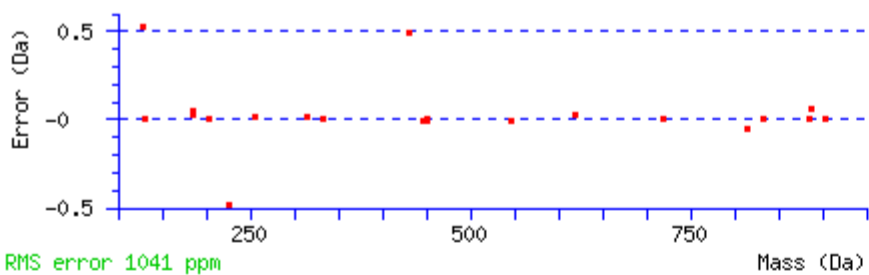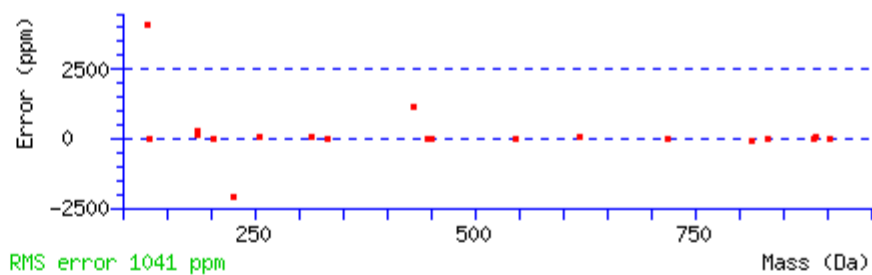

NCBI BLAST search of **SPAITATLEGK**

(Parameters: blastp, nr protein database, expect=20000, no filter, PAM30)

Other BLAST [web gateways](#)

## All matches to this query

| Score | Mr(calc):   | Delta     | Sequence                    |
|-------|-------------|-----------|-----------------------------|
| 36.7  | 1086.592072 | 0.001836  | <a href="#">SPAITATLEGK</a> |
| 4.8   | 1086.596100 | -0.002192 | <a href="#">EPLFLDLPK</a>   |
| 4.5   | 1086.585556 | 0.008352  | <a href="#">LNLPMGATR</a>   |
| 4.1   | 1086.592072 | 0.001836  | <a href="#">LAGVELAETGK</a> |
| 3.4   | 1086.585526 | 0.008382  | <a href="#">APAERCIK</a>    |
| 3.2   | 1086.596100 | -0.002192 | <a href="#">EPLFLDLPK</a>   |
| 2.0   | 1086.596802 | -0.002894 | <a href="#">RVLCVGTPT</a>   |

Mascot: <http://www.matrixscience.com/>

# MASCOT SCIENCE Mascot Search Results

## Peptide View

MS/MS Fragmentation of **EGQGNLPVR**

Found in **ULAI\_HUMAN**, NEDD8-activating enzyme E1 regulatory subunit OS=Homo sapiens GN=NAE1 PE=1 SV=1

Match to Query 219818: 968.500048 from(485.257300,2+) rtinseconds(1151) index(331500)

Title: Locus:1.1.1.772.14

Data file C:\Program Files (x86)\Matrix Science\Mascot Daemon\mgf3 TFD - Epitel - R2\mascot\_daemon\_merge.mgf

Click mouse within plot area to zoom in by factor of two about that point

Or, Plot from  to  Da

Label all possible matches  Label matches used for scoring

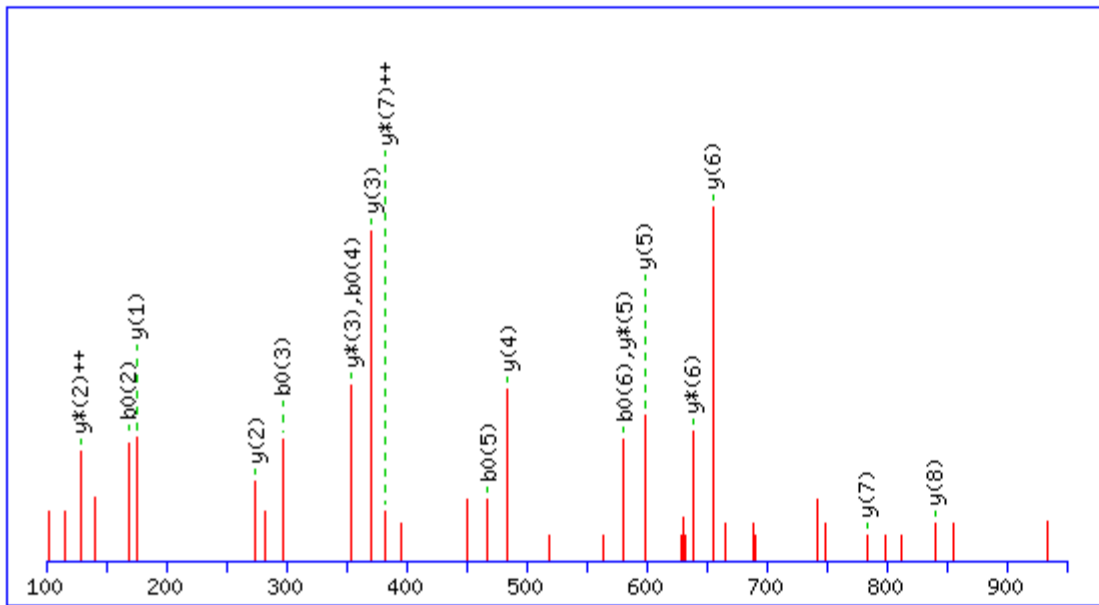

Monoisotopic mass of neutral peptide  $M_r(\text{calc})$ : 968.503937

Fixed modifications: Carbamidomethyl (C) (apply to specified residues or termini only)

Ions Score: 61 Expect: 8.9e-006

Matches : 18/76 fragment ions using 25 most intense peaks [\(help\)](#)

| # | b          | b <sup>++</sup> | b*         | b <sup>+++</sup> | b <sup>0</sup> | b <sup>0++</sup> | Seq. | y          | y <sup>++</sup> | y*         | y <sup>+++</sup> | # |
|---|------------|-----------------|------------|------------------|----------------|------------------|------|------------|-----------------|------------|------------------|---|
| 1 | 130.049869 | 65.528572       |            |                  | 112.039304     | 56.523290        | E    |            |                 |            |                  | 9 |
| 2 | 187.071333 | 94.039305       |            |                  | 169.060768     | 85.034022        | G    | 840.468627 | 420.737952      | 823.442078 | 412.224677       | 8 |
| 3 | 315.129911 | 158.068594      | 298.103362 | 149.555319       | 297.119346     | 149.063311       | Q    | 783.447163 | 392.227220      | 766.420614 | 383.713945       | 7 |
| 4 | 372.151375 | 186.579326      | 355.124826 | 178.066051       | 354.140810     | 177.574043       | G    | 655.388585 | 328.197931      | 638.362036 | 319.684656       | 6 |
| 5 | 486.194302 | 243.600789      | 469.167753 | 235.087515       | 468.183737     | 234.595507       | N    | 598.367121 | 299.687199      | 581.340572 | 291.173924       | 5 |
| 6 | 599.278366 | 300.142821      | 582.251817 | 291.629547       | 581.267801     | 291.137539       | L    | 484.324194 | 242.665735      | 467.297645 | 234.152460       | 4 |
| 7 | 696.331130 | 348.669203      | 679.304581 | 340.155929       | 678.320565     | 339.663921       | P    | 371.240130 | 186.123703      | 354.213581 | 177.610428       | 3 |
| 8 | 795.399544 | 398.203410      | 778.372995 | 389.690136       | 777.388979     | 389.198128       | V    | 274.187366 | 137.597321      | 257.160817 | 129.084046       | 2 |
| 9 |            |                 |            |                  |                |                  | R    | 175.118952 | 88.063114       | 158.092403 | 79.549839        | 1 |

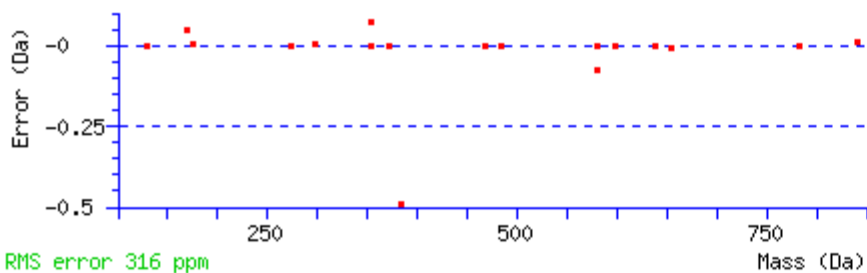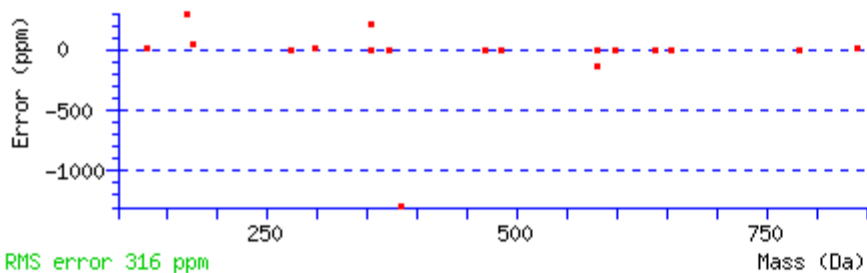

NCBI BLAST search of **EGQGNLPVR**

(Parameters: blastp, nr protein database, expect=20000, no filter, PAM30)

Other BLAST [web gateways](#)

## All matches to this query

| Score | $M_r(\text{calc})$ : | Delta     | Sequence                    |
|-------|----------------------|-----------|-----------------------------|
| 61.3  | 968.503937           | -0.003889 | <a href="#">EGQGNLPVR</a>   |
| 11.9  | 968.492722           | 0.007326  | <a href="#">GPGSGPGALPK</a> |
| 9.9   | 968.496704           | 0.003344  | <a href="#">ELEFYLR</a>     |
| 9.3   | 968.492722           | 0.007326  | <a href="#">GPGSGPGALPK</a> |
| 5.6   | 968.503922           | -0.003874 | <a href="#">INSKGEGHK</a>   |
| 5.4   | 968.503922           | -0.003874 | <a href="#">EEPGPLRR</a>    |
| 5.1   | 968.503937           | -0.003889 | <a href="#">APSQQSPVR</a>   |
| 4.2   | 968.503906           | -0.003858 | <a href="#">EHALSKER</a>    |
| 3.8   | 968.503937           | -0.003889 | <a href="#">DSHKEVVR</a>    |
| 1.5   | 968.507965           | -0.007917 | <a href="#">KGSFVPYR</a>    |

# MASCOT Search Results

## Peptide View

MS/MS Fragmentation of **ALEPTGQSGEAVK**

Found in **NELFB\_HUMAN**, Negative elongation factor B OS=Homo sapiens GN=COBRA1 PE=1 SV=1

Match to Query 625033: 1285.648748 from(643.831650,2+) rtinseconds(1264) index(248802)

Title: Locus:1.1.1.924.36

Data file C:\Program Files (x86)\Matrix Science\Mascot Daemon\mgf3 TFD - Epitel - R2\mascot\_daemon\_merge.mgf

Click mouse within plot area to zoom in by factor of two about that point

Or, Plot from  to  Da

Label all possible matches  Label matches used for scoring

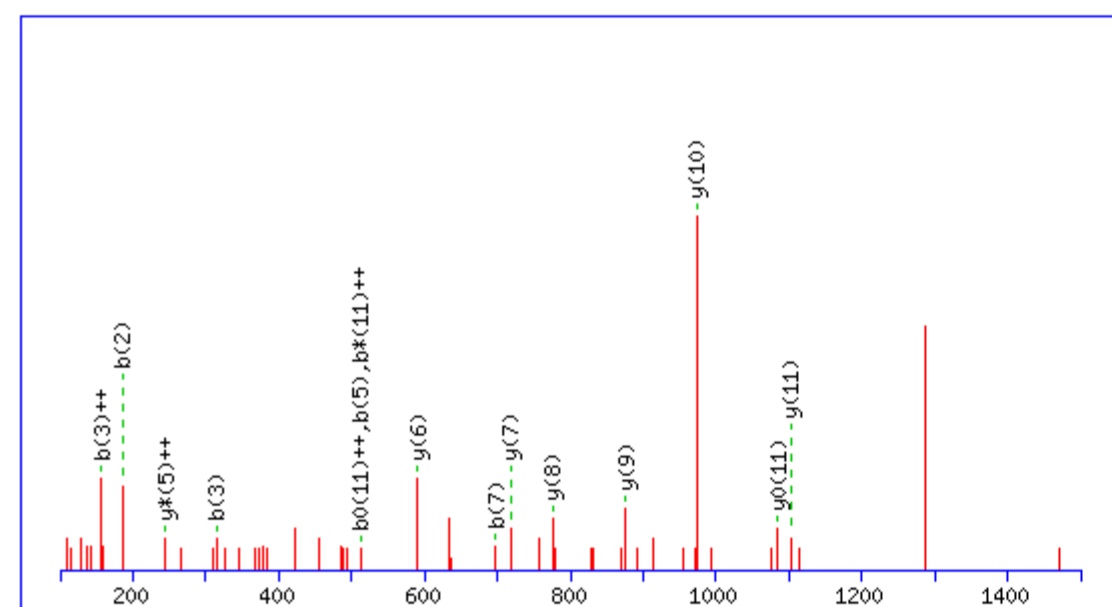

Monoisotopic mass of neutral peptide Mr(calc): 1285.651382

Fixed modifications: Carbamidomethyl (C) (apply to specified residues or termini only)

Ions Score: 37 Expect: 0.0011

Matches : 15/122 fragment ions using 21 most intense peaks [\(help\)](#)

| #  | b                 | b <sup>++</sup>   | b <sup>+</sup> | b <sup>*++</sup>  | b <sup>0</sup> | b <sup>0++</sup>  | Seq. | y                  | y <sup>++</sup> | y <sup>+</sup> | y <sup>*++</sup>  | y <sup>0</sup>     | y <sup>0++</sup> | #  |
|----|-------------------|-------------------|----------------|-------------------|----------------|-------------------|------|--------------------|-----------------|----------------|-------------------|--------------------|------------------|----|
| 1  | 72.044390         | 36.525833         |                |                   |                |                   | A    |                    |                 |                |                   |                    |                  | 13 |
| 2  | <b>185.128454</b> | 93.067865         |                |                   |                |                   | L    | 1215.621559        | 608.314418      | 1198.595010    | 599.801143        | 1197.610994        | 599.309135       | 12 |
| 3  | <b>314.171047</b> | <b>157.589161</b> |                |                   | 296.160482     | 148.583879        | E    | <b>1102.537495</b> | 551.772386      | 1085.510946    | 543.259111        | <b>1084.526930</b> | 542.767103       | 11 |
| 4  | 411.223811        | 206.115544        |                |                   | 393.213246     | 197.110261        | P    | <b>973.494902</b>  | 487.251089      | 956.468353     | 478.737815        | 955.484337         | 478.245807       | 10 |
| 5  | <b>512.271490</b> | 256.639383        |                |                   | 494.260925     | 247.634101        | T    | <b>876.442138</b>  | 438.724707      | 859.415589     | 430.211433        | 858.431573         | 429.719425       | 9  |
| 6  | 569.292954        | 285.150115        |                |                   | 551.282389     | 276.144833        | G    | <b>775.394459</b>  | 388.200868      | 758.367910     | 379.687593        | 757.383894         | 379.195585       | 8  |
| 7  | <b>697.351532</b> | 349.179404        | 680.324983     | 340.666130        | 679.340967     | 340.174122        | Q    | <b>718.372995</b>  | 359.690136      | 701.346446     | 351.176861        | 700.362430         | 350.684853       | 7  |
| 8  | 784.383560        | 392.695418        | 767.357011     | 384.182144        | 766.372995     | 383.690136        | S    | <b>590.314417</b>  | 295.660847      | 573.287868     | 287.147572        | 572.303852         | 286.655564       | 6  |
| 9  | 841.405024        | 421.206150        | 824.378475     | 412.692876        | 823.394459     | 412.200868        | G    | 503.282389         | 252.144833      | 486.255840     | <b>243.631558</b> | 485.271824         | 243.139550       | 5  |
| 10 | 970.447617        | 485.727447        | 953.421068     | 477.214172        | 952.437052     | 476.722164        | E    | 446.260925         | 223.634101      | 429.234376     | 215.120826        | 428.250360         | 214.628818       | 4  |
| 11 | 1041.484731       | 521.246004        | 1024.458182    | <b>512.732729</b> | 1023.474166    | <b>512.240721</b> | A    | 317.218332         | 159.112804      | 300.191783     | 150.599530        |                    |                  | 3  |
| 12 | 1140.553145       | 570.780211        | 1123.526596    | 562.266936        | 1122.542580    | 561.774928        | V    | 246.181218         | 123.594247      | 229.154669     | 115.080973        |                    |                  | 2  |
| 13 |                   |                   |                |                   |                |                   | K    | 147.112804         | 74.060040       | 130.086255     | 65.546765         |                    |                  | 1  |

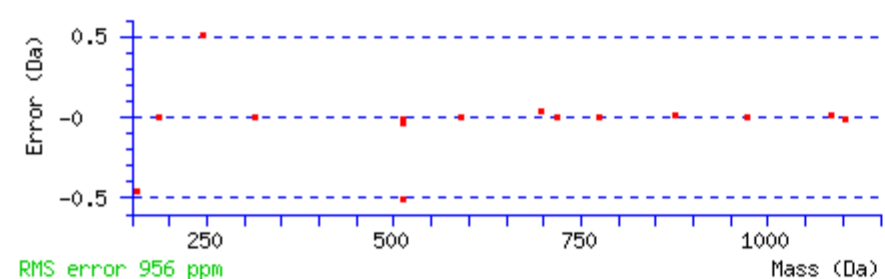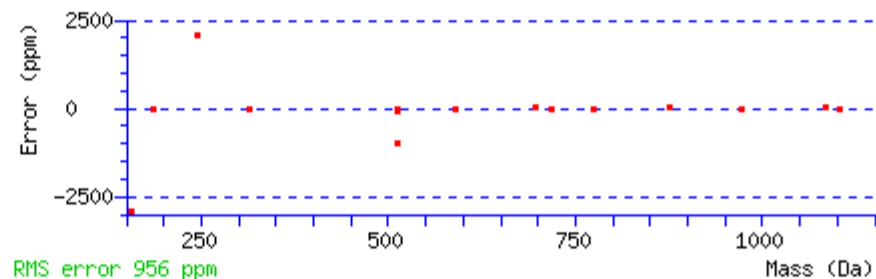

NCBI BLAST search of **ALEPTGQSGEAVK**

(Parameters: blastp, nr protein database, expect=20000, no filter, PAM30)

Other BLAST [web gateways](#)

All matches to this query

| Score | Mr(calc):   | Delta     | Sequence                      |
|-------|-------------|-----------|-------------------------------|
| 37.4  | 1285.651382 | -0.002634 | <a href="#">ALEPTGQSGEAVK</a> |
| 5.5   | 1285.652710 | -0.003962 | <a href="#">IAERQGHSNFK</a>   |
| 1.4   | 1285.641464 | 0.007284  | <a href="#">LAEQEAHYAVR</a>   |
| 0.6   | 1285.655411 | -0.006663 | <a href="#">LVDNIFPEDPK</a>   |

# **MASCOT** Mascot Search Results

## Peptide View

MS/MS Fragmentation of **NKPVELR**

Found in **UNC5B\_HUMAN**, Netrin receptor UNC5B OS=Homo sapiens GN=UNC5B PE=1 SV=2

Match to Query 3750: 854.491368 from(428.252960,2+) rtinseconds(1256) index(8863)

Title: Locus:1.1.1.1892.8

Data file 2011-11-10 - TFD - EP 3-3.mgf

Click mouse within plot area to zoom in by factor of two about that point

Or, Plot from  to  Da

Label all possible matches  Label matches used for scoring

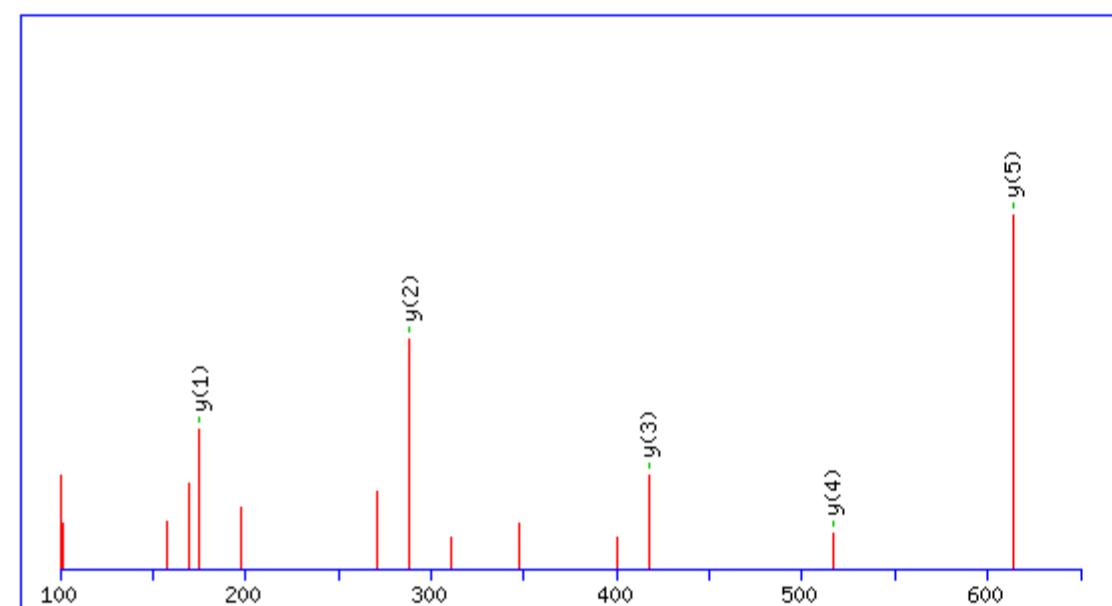

Monoisotopic mass of neutral peptide Mr(calc): 854.497375

Fixed modifications: Propionamide (C) (apply to specified residues or termini only)

Ions Score: 48 Expect: 9.9e-005

Matches : 5/60 fragment ions using 6 most intense peaks ([help](#))

| # | b          | b <sup>++</sup> | b <sup>*</sup> | b <sup>*++</sup> | b <sup>0</sup> | b <sup>0++</sup> | Seq. | y                 | y <sup>++</sup> | y <sup>*</sup> | y <sup>*++</sup> | y <sup>0</sup> | y <sup>0++</sup> | # |
|---|------------|-----------------|----------------|------------------|----------------|------------------|------|-------------------|-----------------|----------------|------------------|----------------|------------------|---|
| 1 | 115.050203 | 58.028740       | 98.023654      | 49.515465        |                |                  | N    |                   |                 |                |                  |                |                  | 7 |
| 2 | 243.145166 | 122.076221      | 226.118617     | 113.562947       |                |                  | K    | 741.461750        | 371.234513      | 724.435201     | 362.721239       | 723.451185     | 362.229231       | 6 |
| 3 | 340.197930 | 170.602603      | 323.171381     | 162.089328       |                |                  | P    | <b>613.366787</b> | 307.187032      | 596.340238     | 298.673757       | 595.356222     | 298.181749       | 5 |
| 4 | 439.266344 | 220.136810      | 422.239795     | 211.623536       |                |                  | V    | <b>516.314023</b> | 258.660650      | 499.287474     | 250.147375       | 498.303458     | 249.655367       | 4 |
| 5 | 568.308937 | 284.658107      | 551.282388     | 276.144832       | 550.298372     | 275.652824       | E    | <b>417.245609</b> | 209.126443      | 400.219060     | 200.613168       | 399.235044     | 200.121160       | 3 |
| 6 | 681.393001 | 341.200139      | 664.366452     | 332.686864       | 663.382436     | 332.194856       | L    | <b>288.203016</b> | 144.605146      | 271.176467     | 136.091872       |                |                  | 2 |
| 7 |            |                 |                |                  |                |                  | R    | <b>175.118952</b> | 88.063114       | 158.092403     | 79.549840        |                |                  | 1 |

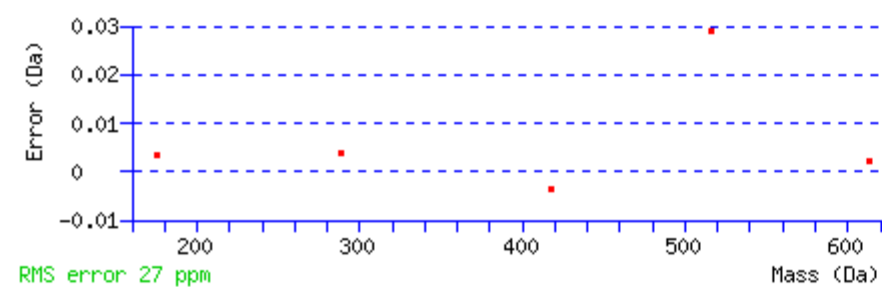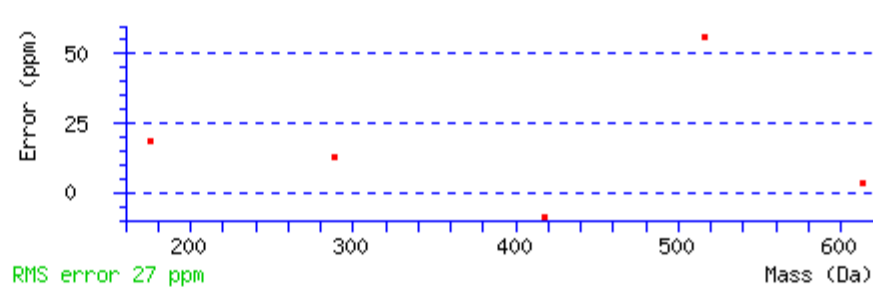

NCBI BLAST search of **NKPVELR**

(Parameters: blastp, nr protein database, expect=20000, no filter, PAM30)

Other BLAST [web gateways](#)

All matches to this query

| Score | Mr(calc):  | Delta     | Sequence                  |
|-------|------------|-----------|---------------------------|
| 48.4  | 854.497375 | -0.006007 | <a href="#">NKPVELR</a>   |
| 21.2  | 854.497375 | -0.006007 | <a href="#">KPVNELR</a>   |
| 17.7  | 854.497391 | -0.006023 | <a href="#">QNVPIIR</a>   |
| 9.6   | 854.497391 | -0.006023 | <a href="#">QPKDVLRL</a>  |
| 3.1   | 854.486145 | 0.005223  | <a href="#">LELPLDR</a>   |
| 2.3   | 854.497375 | -0.006007 | <a href="#">AGAAPALLR</a> |
| 2.3   | 854.497391 | -0.006023 | <a href="#">AQTLPLRL</a>  |
| 2.3   | 854.497391 | -0.006023 | <a href="#">KAAVPTPR</a>  |
| 2.3   | 854.497375 | -0.006007 | <a href="#">QAALPSLR</a>  |
| 1.8   | 854.483459 | 0.007909  | <a href="#">ASRPRPR</a>   |

# MASCOT SEARCH RESULTS

## Peptide View

MS/MS Fragmentation of **SISLSSLEPR**

Found in **NBEL2\_HUMAN**, Neurobeachin-like protein 2 OS=Homo sapiens GN=NBEAL2 PE=1 SV=2

Match to Query 15295: 1103.589148 from(552.801850,2+) rtinseconds(1814) index(19179)

Title: Locus:1.1.1.1073.20

Data file 2012-01-27 - TFD - Epitel - IEC - 10ul - 2.mgf

Click mouse within plot area to zoom in by factor of two about that point

Or, Plot from  to  Da

Label all possible matches  Label matches used for scoring

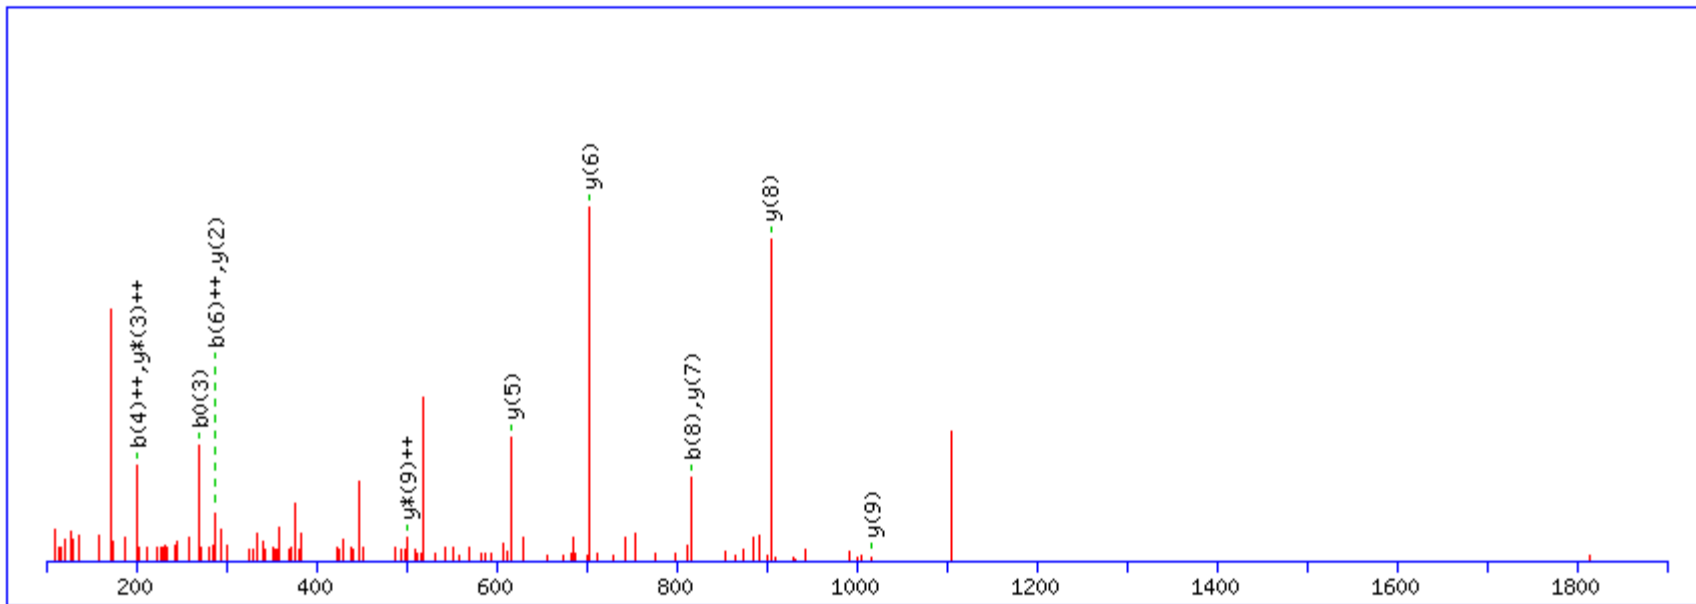

Monoisotopic mass of neutral peptide **Mr(calc): 1103.582230**

Fixed modifications: Carbamidomethyl (C) (apply to specified residues or termini only)

Variable modifications:

P9 : Oxidation (P)

Ions Score: 35 Expect: 0.005

Matches : 14/86 fragment ions using 19 most intense peaks [\(help\)](#)

| #  | b                 | b <sup>++</sup>   | b <sup>0</sup>    | b <sup>0++</sup> | Seq. | y                  | y <sup>++</sup> | y <sup>*</sup> | y <sup>*++</sup>  | y <sup>0</sup> | y <sup>0++</sup> | #  |
|----|-------------------|-------------------|-------------------|------------------|------|--------------------|-----------------|----------------|-------------------|----------------|------------------|----|
| 1  | 88.039304         | 44.523290         | 70.028739         | 35.518008        | S    |                    |                 |                |                   |                |                  | 10 |
| 2  | <b>201.123368</b> | 101.065322        | 183.112803        | 92.060039        | I    | <b>1017.557500</b> | 509.282388      | 1000.530951    | <b>500.769114</b> | 999.546935     | 500.277106       | 9  |
| 3  | <b>288.155396</b> | 144.581336        | <b>270.144831</b> | 135.576053       | S    | <b>904.473436</b>  | 452.740356      | 887.446887     | 444.227082        | 886.462871     | 443.735074       | 8  |
| 4  | 401.239460        | <b>201.123368</b> | 383.228895        | 192.118085       | L    | <b>817.441408</b>  | 409.224342      | 800.414859     | 400.711068        | 799.430843     | 400.219060       | 7  |
| 5  | 488.271488        | 244.639382        | 470.260923        | 235.634099       | S    | <b>704.357344</b>  | 352.682310      | 687.330795     | 344.169036        | 686.346779     | 343.677028       | 6  |
| 6  | 575.303516        | <b>288.155396</b> | 557.292951        | 279.150113       | S    | <b>617.325316</b>  | 309.166296      | 600.298767     | 300.653022        | 599.314751     | 300.161014       | 5  |
| 7  | 688.387580        | 344.697428        | 670.377015        | 335.692145       | L    | 530.293288         | 265.650282      | 513.266739     | 257.137008        | 512.282723     | 256.645000       | 4  |
| 8  | <b>817.430173</b> | 409.218725        | 799.419608        | 400.213442       | E    | 417.209224         | 209.108250      | 400.182675     | <b>200.594975</b> | 399.198659     | 200.102967       | 3  |
| 9  | 930.477852        | 465.742564        | 912.467287        | 456.737281       | P    | <b>288.166631</b>  | 144.586953      | 271.140082     | 136.073679        |                |                  | 2  |
| 10 |                   |                   |                   |                  | R    | 175.118952         | 88.063114       | 158.092403     | 79.549839         |                |                  | 1  |

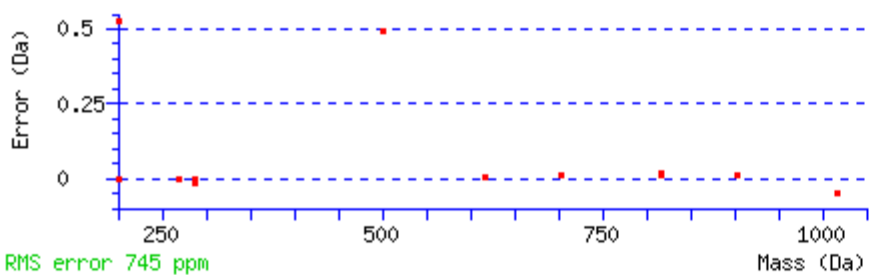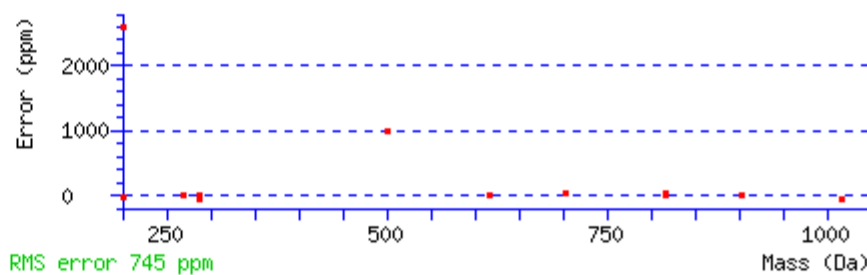

NCBI BLAST search of [SISLSSLEPR](#)

(Parameters: blastp, nr protein database, expect=20000, no filter, PAM30)

Other BLAST [web gateways](#)

## All matches to this query

| Score | Mr(calc):   | Delta     | Sequence                     |
|-------|-------------|-----------|------------------------------|
| 64.6  | 1103.593475 | -0.004327 | <a href="#">SISISVAAGGSR</a> |
| 35.0  | 1103.582230 | 0.006918  | <a href="#">SISLSSLEPR</a>   |
| 7.8   | 1103.597488 | -0.008340 | <a href="#">DPYTLNLR</a>     |
| 5.9   | 1103.593460 | -0.004312 | <a href="#">LSSSLNPSKR</a>   |
| 5.8   | 1103.597519 | -0.008371 | <a href="#">KFLVDDPR</a>     |
| 3.6   | 1103.593475 | -0.004327 | <a href="#">LSSTQEGVRK</a>   |
| 2.1   | 1103.597504 | -0.008356 | <a href="#">EVLSFKPPR</a>    |

Mascot: <http://www.matrixscience.com/>



**MATRIX SCIENCE Mascot Search Results**

**Peptide View**

MS/MS Fragmentation of **LKPLGEAER**

Found in **NEUL\_HUMAN**, Neurolysin, mitochondrial OS=Homo sapiens GN=NLN PE=1 SV=1

Match to Query 17672: 1027.573888 from(514.794220,2+) rtinseconds(1698) index(16750)

Title: Locus:1.1.1.2059.27

Data file 2011-11-14 - TFD - EP 8-1.mgf

Click mouse within plot area to zoom in by factor of two about that point

Or, Plot from  to  Da

Label all possible matches  Label matches used for scoring

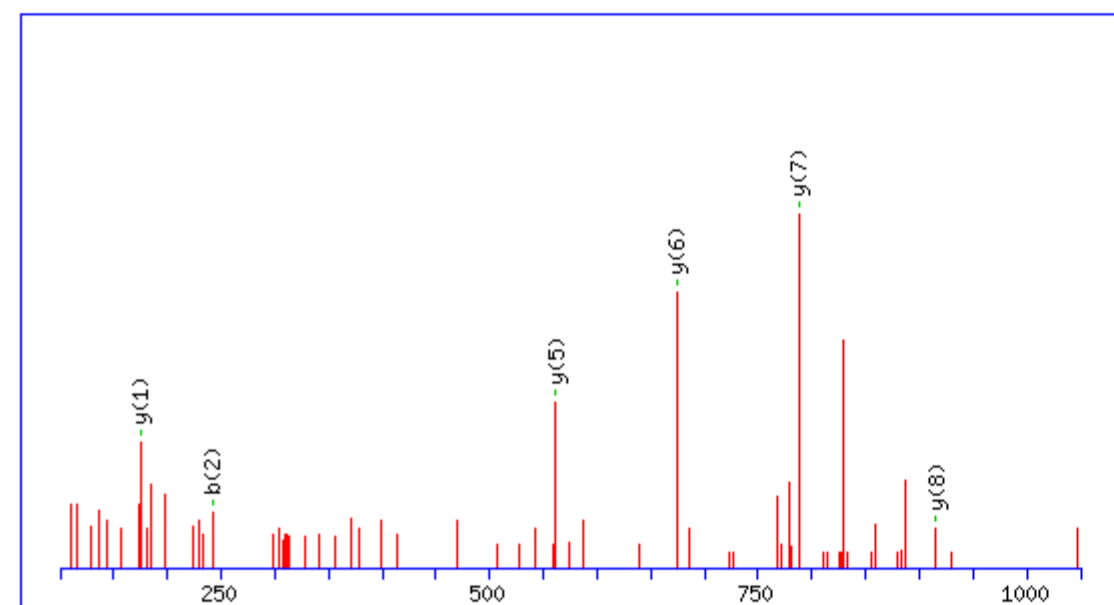

Monoisotopic mass of neutral peptide Mr(calc): 1027.566177

Fixed modifications: Propionamide (C) (apply to specified residues or termini only)

Variable modifications:

P3 : Oxidation (P)

Ions Score: 32 Expect: 0.0083

Matches : 6/82 fragment ions using 9 most intense peaks ([help](#))

| # | b                 | b <sup>++</sup> | b <sup>*</sup> | b <sup>*++</sup> | b <sup>0</sup> | b <sup>0++</sup> | Seq. | y                 | y <sup>++</sup> | y <sup>*</sup> | y <sup>*++</sup> | y <sup>0</sup> | y <sup>0++</sup> | # |
|---|-------------------|-----------------|----------------|------------------|----------------|------------------|------|-------------------|-----------------|----------------|------------------|----------------|------------------|---|
| 1 | 114.091340        | 57.549308       |                |                  |                |                  | L    |                   |                 |                |                  |                |                  | 9 |
| 2 | <b>242.186303</b> | 121.596790      | 225.159754     | 113.083515       |                |                  | K    | <b>915.489422</b> | 458.248349      | 898.462873     | 449.735075       | 897.478857     | 449.243067       | 8 |
| 3 | 355.233982        | 178.120629      | 338.207433     | 169.607355       |                |                  | P    | <b>787.394459</b> | 394.200868      | 770.367910     | 385.687593       | 769.383894     | 385.195585       | 7 |
| 4 | 468.318046        | 234.662661      | 451.291497     | 226.149387       |                |                  | L    | <b>674.346780</b> | 337.677028      | 657.320231     | 329.163754       | 656.336215     | 328.671746       | 6 |
| 5 | 525.339510        | 263.173393      | 508.312961     | 254.660119       |                |                  | G    | <b>561.262716</b> | 281.134996      | 544.236167     | 272.621722       | 543.252151     | 272.129714       | 5 |
| 6 | 654.382103        | 327.694690      | 637.355554     | 319.181415       | 636.371538     | 318.689407       | E    | 504.241252        | 252.624264      | 487.214703     | 244.110990       | 486.230687     | 243.618982       | 4 |
| 7 | 725.419217        | 363.213247      | 708.392668     | 354.699972       | 707.408652     | 354.207964       | A    | 375.198659        | 188.102968      | 358.172110     | 179.589693       | 357.188094     | 179.097685       | 3 |
| 8 | 854.461810        | 427.734543      | 837.435261     | 419.221269       | 836.451245     | 418.729261       | E    | 304.161545        | 152.584411      | 287.134996     | 144.071136       | 286.150980     | 143.579128       | 2 |
| 9 |                   |                 |                |                  |                |                  | R    | <b>175.118952</b> | 88.063114       | 158.092403     | 79.549840        |                |                  | 1 |

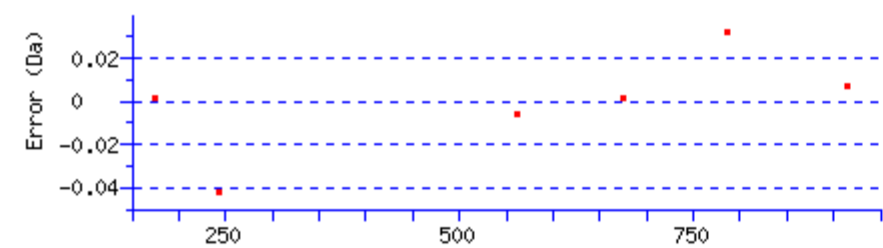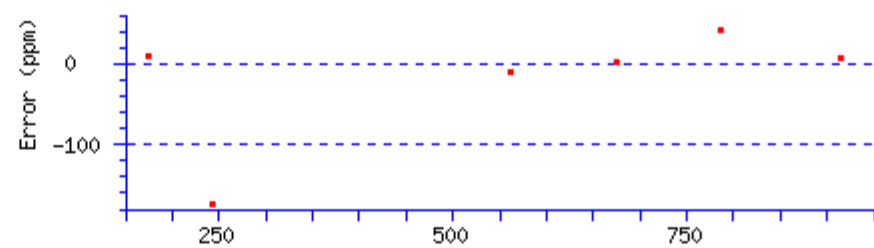

NCBI BLAST search of [LKPLGEAER](#)

(Parameters: blastp, nr protein database, expect=20000, no filter, PAM30)

Other BLAST [web gateways](#)

**All matches to this query**

| Score | Mr(calc):   | Delta     | Sequence                  |
|-------|-------------|-----------|---------------------------|
| 32.1  | 1027.566177 | 0.007711  | <a href="#">LKPLGEAER</a> |
| 19.4  | 1027.566177 | 0.007711  | <a href="#">AAVLLEQER</a> |
| 19.1  | 1027.581451 | -0.007563 | <a href="#">IQISLWPR</a>  |
| 7.5   | 1027.570221 | 0.003667  | <a href="#">LQPEFVPAK</a> |
| 7.3   | 1027.566193 | 0.007695  | <a href="#">IQSLPDLR</a>  |
| 7.3   | 1027.566177 | 0.007711  | <a href="#">LQKLPEER</a>  |
| 6.6   | 1027.566177 | 0.007711  | <a href="#">LPKQIEER</a>  |
| 6.5   | 1027.577438 | -0.003550 | <a href="#">SLPSVTRPR</a> |
| 6.1   | 1027.581467 | -0.007579 | <a href="#">IPQTVLWR</a>  |
| 6.1   | 1027.566177 | 0.007711  | <a href="#">LLQAEEVAR</a> |

**MASCOT** SCIENCE Mascot Search Results

Peptide View

MS/MS Fragmentation of **IVTSEEVIIR**

Found in **NPTN\_HUMAN**, Neuroplastin OS=Homo sapiens GN=NPTN PE=1 SV=2

Match to Query 25517: 1157.664968 from(579.839760,2+) rtinseconds(2125) index(21434)

Title: Locus:1.1.1.2451.36

Data file 2011-11-12 - TFD - EP 5-2.mgf

Click mouse within plot area to zoom in by factor of two about that point

Or, Plot from  to  Da

Label all possible matches  Label matches used for scoring

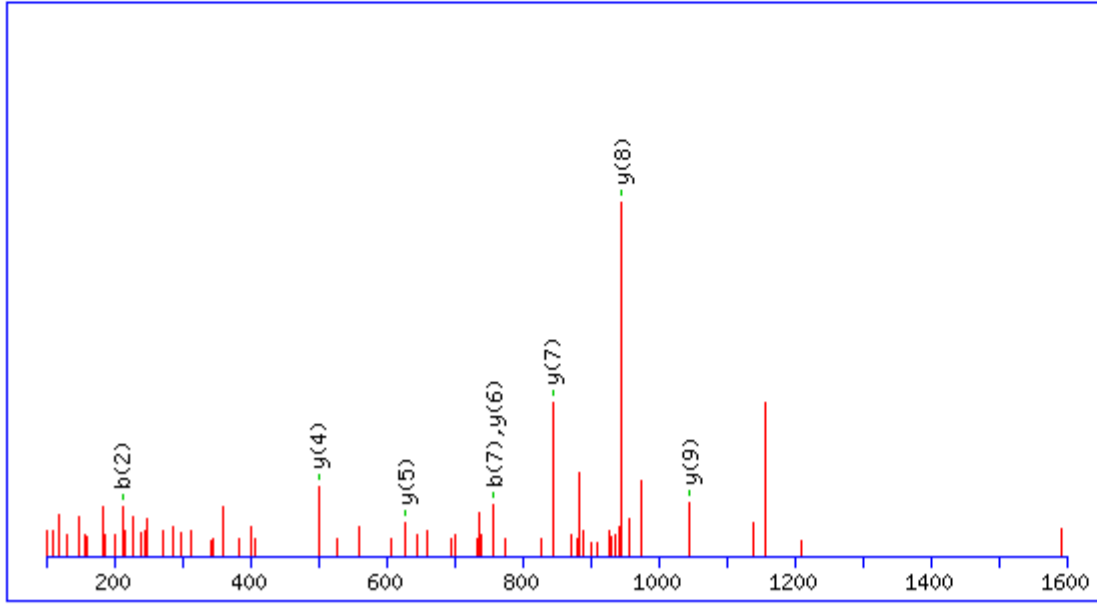

Monoisotopic mass of neutral peptide Mr(calc): 1157.665573

Fixed modifications: Propionamide (C) (apply to specified residues or termini only)

Ions Score: 51 Expect: 4.7e-005

Matches : 8/78 fragment ions using 11 most intense peaks [\(help\)](#)

| #  | b                 | b <sup>++</sup> | b <sup>0</sup> | b <sup>0++</sup> | Seq. | y                  | y <sup>++</sup> | y <sup>*</sup> | y <sup>+++</sup> | y <sup>0</sup> | y <sup>0++</sup> | #  |
|----|-------------------|-----------------|----------------|------------------|------|--------------------|-----------------|----------------|------------------|----------------|------------------|----|
| 1  | 114.091340        | 57.549308       |                |                  | I    |                    |                 |                |                  |                |                  | 10 |
| 2  | <b>213.159754</b> | 107.083515      |                |                  | V    | <b>1045.588801</b> | 523.298039      | 1028.562252    | 514.784764       | 1027.578236    | 514.292756       | 9  |
| 3  | 314.207433        | 157.607354      | 296.196868     | 148.602072       | T    | <b>946.520387</b>  | 473.763832      | 929.493838     | 465.250557       | 928.509822     | 464.758549       | 8  |
| 4  | 401.239461        | 201.123368      | 383.228896     | 192.118086       | S    | <b>845.472708</b>  | 423.239992      | 828.446159     | 414.726718       | 827.462143     | 414.234710       | 7  |
| 5  | 530.282054        | 265.644665      | 512.271489     | 256.639383       | E    | <b>758.440680</b>  | 379.723978      | 741.414131     | 371.210704       | 740.430115     | 370.718696       | 6  |
| 6  | 659.324647        | 330.165962      | 641.314082     | 321.160679       | E    | <b>629.398087</b>  | 315.202682      | 612.371538     | 306.689407       | 611.387522     | 306.197399       | 5  |
| 7  | <b>758.393061</b> | 379.700169      | 740.382496     | 370.694886       | V    | <b>500.355494</b>  | 250.681385      | 483.328945     | 242.168110       |                |                  | 4  |
| 8  | 871.477125        | 436.242201      | 853.466560     | 427.236918       | I    | 401.287080         | 201.147178      | 384.260531     | 192.633903       |                |                  | 3  |
| 9  | 984.561189        | 492.784233      | 966.550624     | 483.778950       | I    | 288.203016         | 144.605146      | 271.176467     | 136.091871       |                |                  | 2  |
| 10 |                   |                 |                |                  | R    | 175.118952         | 88.063114       | 158.092403     | 79.549839        |                |                  | 1  |

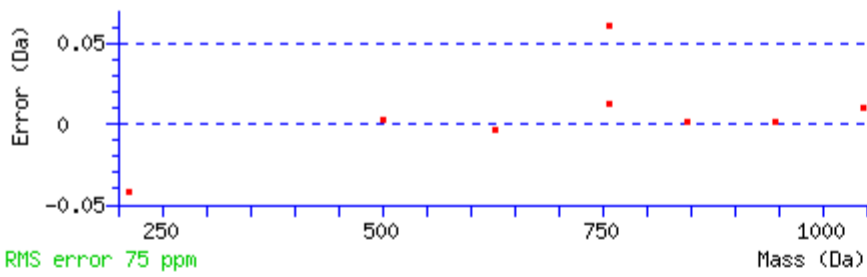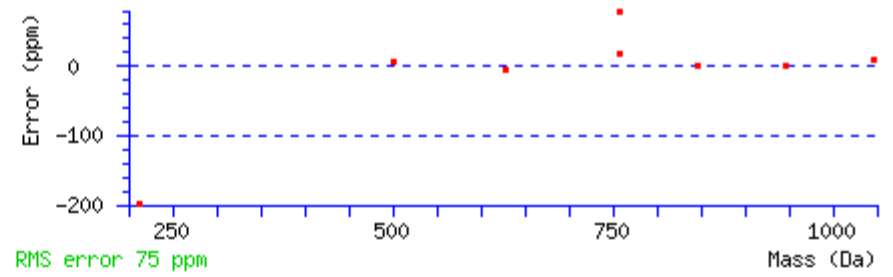

NCBI BLAST search of [IVTSEEVIIR](#)

(Parameters: blastp, nr protein database, expect=20000, no filter, PAM30)

Other BLAST [web gateways](#)

All matches to this query

| Score | Mr(calc):   | Delta     | Sequence                     |
|-------|-------------|-----------|------------------------------|
| 51.0  | 1157.665573 | -0.000605 | <a href="#">IVTSEEVIIR</a>   |
| 4.5   | 1157.665573 | -0.000605 | <a href="#">LVVGD SLKAEK</a> |
| 4.4   | 1157.655701 | 0.009267  | <a href="#">NVVSGGFPIIR</a>  |
| 3.6   | 1157.665573 | -0.000605 | <a href="#">ISPAKVAEVTK</a>  |
| 2.8   | 1157.659027 | 0.005941  | <a href="#">LCLRINEVK</a>    |
| 1.0   | 1157.670273 | -0.005305 | <a href="#">LAIMVNGRLR</a>   |
| 0.8   | 1157.665588 | -0.000620 | <a href="#">KPDGTVLLSTK</a>  |
| 0.3   | 1157.665573 | -0.000605 | <a href="#">LPKSLSSSPVK</a>  |

# MASCOT SCIENCE Mascot Search Results

## Peptide View

MS/MS Fragmentation of **SAAHCVANVNVR**

Found in **ELNE\_HUMAN**, Neutrophil elastase OS=Homo sapiens GN=ELANE PE=1 SV=1

Match to Query 636981: 1296.634332 from(433.218720,3+) rtinseconds(1106) index(496016)

Title: Locus:1.1.1.746.15

Data file C:\Program Files (x86)\Matrix Science\Mascot Daemon\mgf3 TFD - Epitel - R2\mascot\_daemon\_merge.mgf

Click mouse within plot area to zoom in by factor of two about that point

Or, Plot from  to  Da

Label all possible matches  Label matches used for scoring

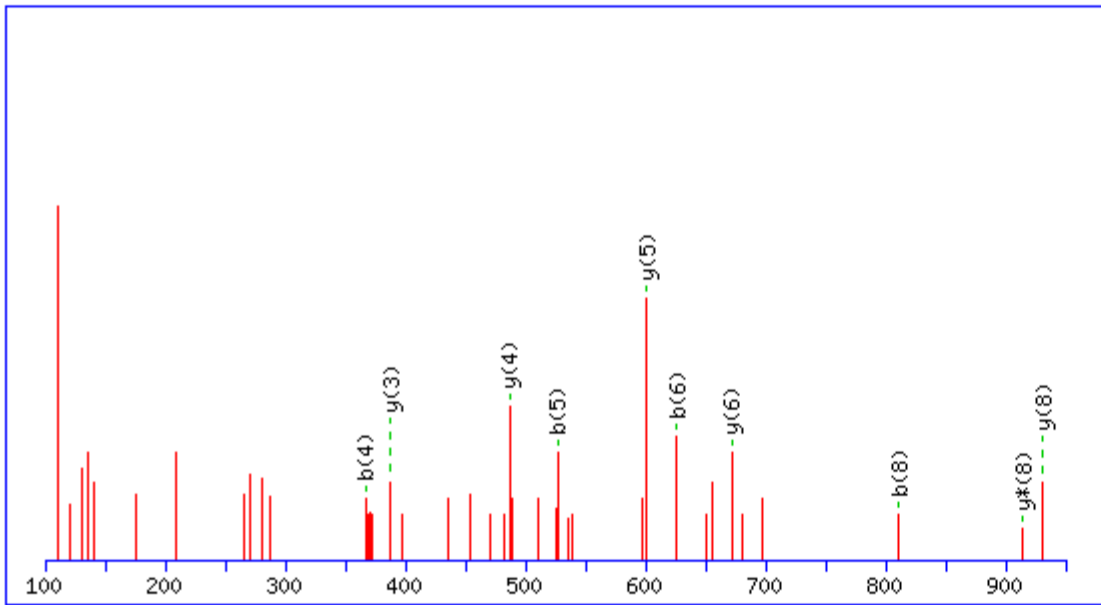

Monoisotopic mass of neutral peptide  $M_r(\text{calc})$ : 1296.635696

Fixed modifications: Carbamidomethyl (C) (apply to specified residues or termini only)

Ions Score: 33 Expect: 0.007

Matches : 10/96 fragment ions using 15 most intense peaks ([help](#))

| #  | b                 | b <sup>++</sup> | b <sup>*</sup> | b <sup>+++</sup> | b <sup>0</sup> | b <sup>0++</sup> | Seq. | y                 | y <sup>++</sup> | y <sup>*</sup>    | y <sup>+++</sup> | #  |
|----|-------------------|-----------------|----------------|------------------|----------------|------------------|------|-------------------|-----------------|-------------------|------------------|----|
| 1  | 88.039304         | 44.523290       |                |                  | 70.028739      | 35.518008        | S    |                   |                 |                   |                  | 12 |
| 2  | 159.076418        | 80.041847       |                |                  | 141.065853     | 71.036564        | A    | 1210.610951       | 605.809113      | 1193.584402       | 597.295839       | 11 |
| 3  | 230.113532        | 115.560404      |                |                  | 212.102967     | 106.555121       | A    | 1139.573837       | 570.290556      | 1122.547288       | 561.777282       | 10 |
| 4  | <b>367.172444</b> | 184.089860      |                |                  | 349.161879     | 175.084577       | H    | 1068.536723       | 534.771999      | 1051.510174       | 526.258725       | 9  |
| 5  | <b>527.203093</b> | 264.105185      |                |                  | 509.192528     | 255.099902       | C    | <b>931.477811</b> | 466.242544      | <b>914.451262</b> | 457.729269       | 8  |
| 6  | <b>626.271507</b> | 313.639392      |                |                  | 608.260942     | 304.634109       | V    | 771.447162        | 386.227219      | 754.420613        | 377.713944       | 7  |
| 7  | 697.308621        | 349.157949      |                |                  | 679.298056     | 340.152666       | A    | <b>672.378748</b> | 336.693012      | 655.352199        | 328.179737       | 6  |
| 8  | <b>811.351548</b> | 406.179412      | 794.324999     | 397.666137       | 793.340983     | 397.174129       | N    | <b>601.341634</b> | 301.174455      | 584.315085        | 292.661181       | 5  |
| 9  | 910.419962        | 455.713619      | 893.393413     | 447.200344       | 892.409397     | 446.708336       | V    | <b>487.298707</b> | 244.152991      | 470.272158        | 235.639717       | 4  |
| 10 | 1024.462889       | 512.735082      | 1007.436340    | 504.221808       | 1006.452324    | 503.729800       | N    | <b>388.230293</b> | 194.618784      | 371.203744        | 186.105510       | 3  |
| 11 | 1123.531303       | 562.269290      | 1106.504754    | 553.756015       | 1105.520738    | 553.264007       | V    | 274.187366        | 137.597321      | 257.160817        | 129.084047       | 2  |
| 12 |                   |                 |                |                  |                |                  | R    | 175.118952        | 88.063114       | 158.092403        | 79.549839        | 1  |

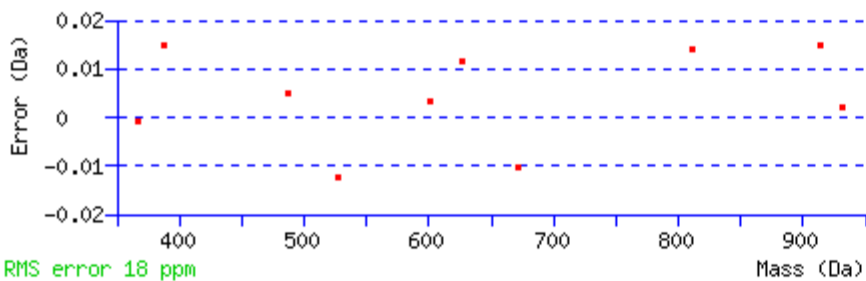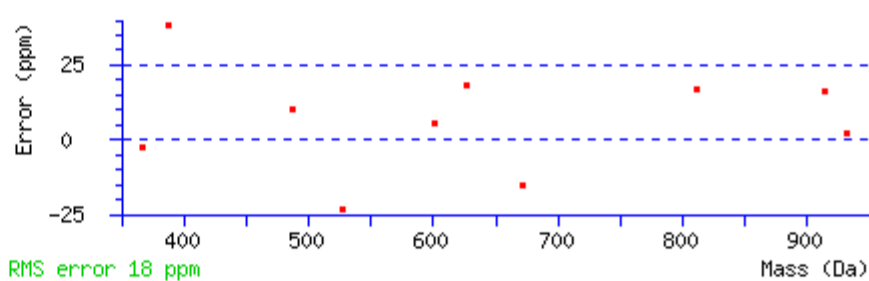

NCBI BLAST search of [SAAHCVANVNVR](#)

(Parameters: blastp, nr protein database, expect=20000, no filter, PAM30)

Other BLAST [web gateways](#)

All matches to this query

| Score | $M_r(\text{calc})$ : | Delta     | Sequence                     |
|-------|----------------------|-----------|------------------------------|
| 32.8  | 1296.635696          | -0.001364 | <a href="#">SAAHCVANVNVR</a> |

Mascot: <http://www.matrixscience.com/>

**Peptide View**

MS/MS Fragmentation of **TLIEPFTLLASK**

Found in **KBRSI\_HUMAN**, NF-kappa-B inhibitor-interacting Ras-like protein 1 OS=Homo sapiens GN=NKIRAS1 PE=1 SV=1

Match to Query 37658: 1331.775648 from(666.895100,2+) rtinseconds(3765) index(48324)

Title: Locus:1.1.1.2703.5

Data file 2011-11-14 - TFD - EP 8-6.mgf

Click mouse within plot area to zoom in by factor of two about that point

Or, Plot from  to  Da

Label all possible matches  Label matches used for scoring

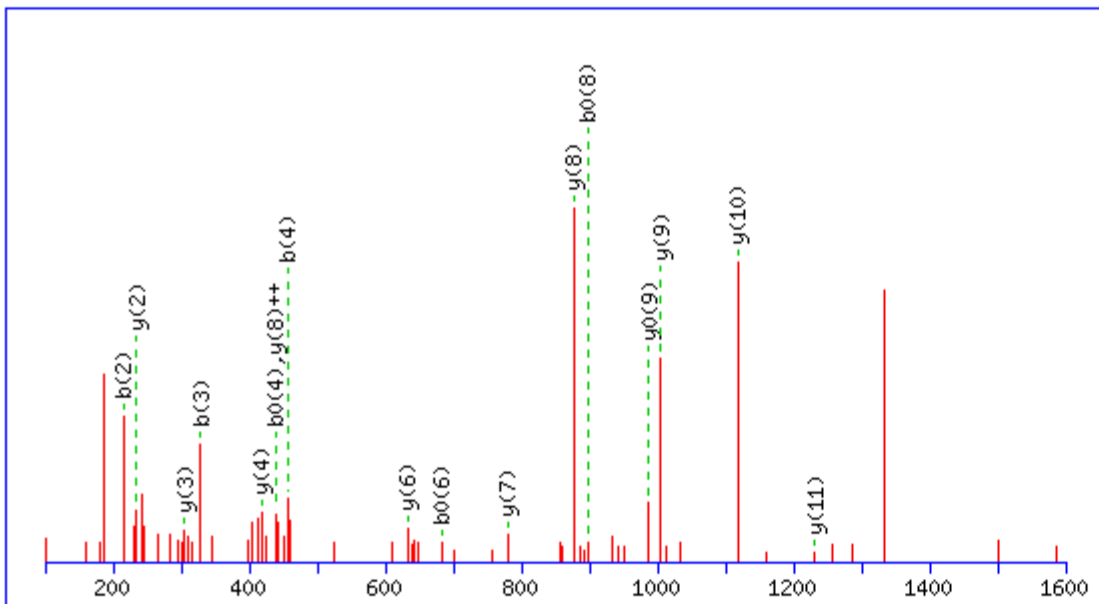

Monoisotopic mass of neutral peptide Mr(calc): 1331.770035

Fixed modifications: Propionamide (C) (apply to specified residues or termini only)

Ions Score: 58 Expect: 2.8e-006

Matches : 17/108 fragment ions using 33 most intense peaks [\(help\)](#)

| #  | b                 | b <sup>++</sup> | b <sup>0</sup>    | b <sup>0++</sup> | Seq. | y                  | y <sup>++</sup>   | y <sup>*</sup> | y <sup>*++</sup> | y <sup>0</sup>    | y <sup>0++</sup> | #  |
|----|-------------------|-----------------|-------------------|------------------|------|--------------------|-------------------|----------------|------------------|-------------------|------------------|----|
| 1  | 102.054955        | 51.531116       | 84.044390         | 42.525833        | T    |                    |                   |                |                  |                   |                  | 12 |
| 2  | <b>215.139019</b> | 108.073147      | 197.128454        | 99.067865        | L    | <b>1231.729652</b> | 616.368464        | 1214.703103    | 607.855190       | 1213.719087       | 607.363182       | 11 |
| 3  | <b>328.223083</b> | 164.615179      | 310.212518        | 155.609897       | I    | <b>1118.645588</b> | 559.826432        | 1101.619039    | 551.313158       | 1100.635023       | 550.821150       | 10 |
| 4  | <b>457.265676</b> | 229.136476      | <b>439.255111</b> | 220.131193       | E    | <b>1005.561524</b> | 503.284400        | 988.534975     | 494.771125       | <b>987.550959</b> | 494.279117       | 9  |
| 5  | 554.318440        | 277.662858      | 536.307875        | 268.657576       | P    | <b>876.518931</b>  | <b>438.763104</b> | 859.492382     | 430.249829       | 858.508366        | 429.757821       | 8  |
| 6  | 701.386854        | 351.197065      | <b>683.376289</b> | 342.191782       | F    | <b>779.466167</b>  | 390.236722        | 762.439618     | 381.723447       | 761.455602        | 381.231439       | 7  |
| 7  | 802.434533        | 401.720905      | 784.423968        | 392.715622       | T    | <b>632.397753</b>  | 316.702515        | 615.371204     | 308.189240       | 614.387188        | 307.697232       | 6  |
| 8  | 915.518597        | 458.262937      | <b>897.508032</b> | 449.257654       | L    | 531.350074         | 266.178675        | 514.323525     | 257.665401       | 513.339509        | 257.173393       | 5  |
| 9  | 1028.602661       | 514.804968      | 1010.592096       | 505.799686       | L    | <b>418.266010</b>  | 209.636643        | 401.239461     | 201.123368       | 400.255445        | 200.631360       | 4  |
| 10 | 1099.639775       | 550.323525      | 1081.629210       | 541.318243       | A    | <b>305.181946</b>  | 153.094611        | 288.155397     | 144.581337       | 287.171381        | 144.089329       | 3  |
| 11 | 1186.671803       | 593.839540      | 1168.661238       | 584.834257       | S    | <b>234.144832</b>  | 117.576054        | 217.118283     | 109.062780       | 216.134267        | 108.570772       | 2  |
| 12 |                   |                 |                   |                  | K    | 147.112804         | 74.060040         | 130.086255     | 65.546765        |                   |                  | 1  |

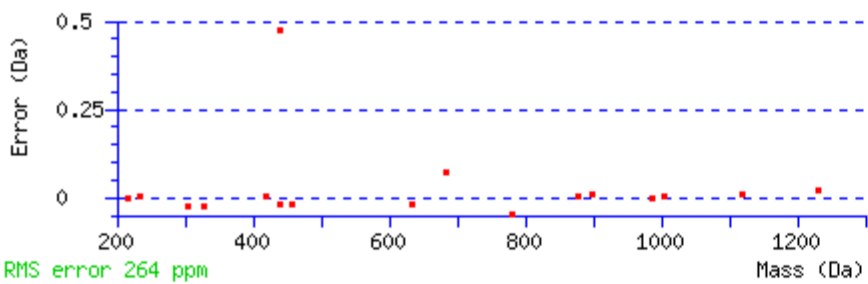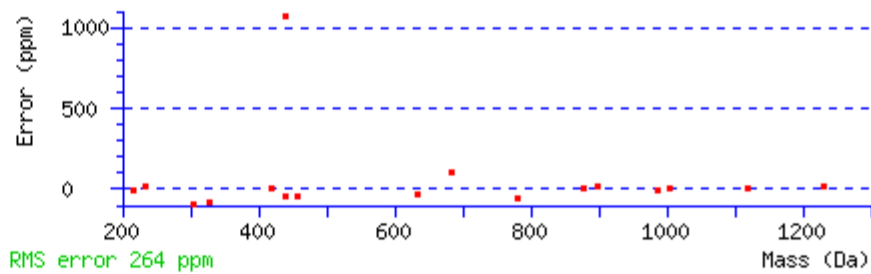

NCBI BLAST search of [TLIEPFTLLASK](#)

(Parameters: blastp, nr protein database, expect=20000, no filter, PAM30)

Other BLAST [web gateways](#)

**All matches to this query**

| Score | Mr(calc):   | Delta    | Sequence                     |
|-------|-------------|----------|------------------------------|
| 58.1  | 1331.770035 | 0.005613 | <a href="#">TLIEPFTLLASK</a> |

# MATRIX SCIENCE Mascot Search Results

## Peptide View

MS/MS Fragmentation of **SLLEPFVYLASK**

Found in **KBR2\_HUMAN**, NF-kappa-B inhibitor-interacting Ras-like protein 2 OS=Homo sapiens GN=NKIRAS2 PE=1 SV=1

Match to Query 39974: 1365.757668 from(683.886110,2+) rtinseconds(3904) index(52058)

Title: Locus:1.1.1.2634.9

Data file 2011-11-12 - TFD - EP 6-6.mgf

Click mouse within plot area to zoom in by factor of two about that point

Or, Plot from  to  Da

Label all possible matches  Label matches used for scoring

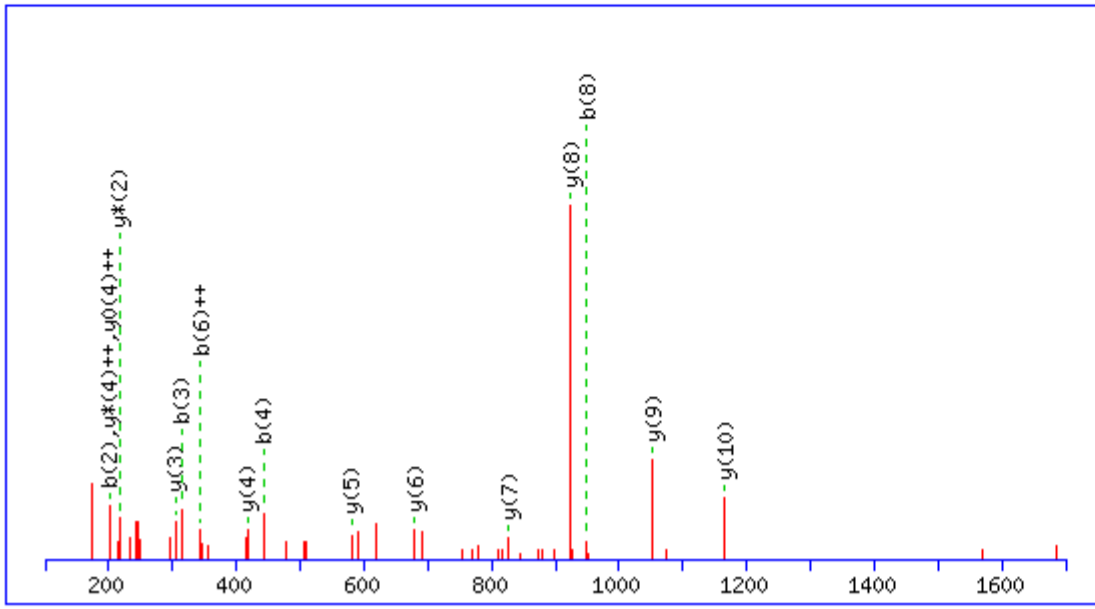

Monoisotopic mass of neutral peptide Mr(calc): 1365.754379

Fixed modifications: Propionamide (C) (apply to specified residues or termini only)

Ions Score: 48 Expect: 4.5e-005

Matches : 16/108 fragment ions using 27 most intense peaks ([help](#))

| #  | b                 | b <sup>++</sup>   | b <sup>0</sup> | b <sup>0++</sup> | Seq. | y                  | y <sup>++</sup> | y <sup>*</sup>    | y <sup>*++</sup>  | y <sup>0</sup> | y <sup>0++</sup>  | #  |
|----|-------------------|-------------------|----------------|------------------|------|--------------------|-----------------|-------------------|-------------------|----------------|-------------------|----|
| 1  | 88.039304         | 44.523290         | 70.028739      | 35.518008        | S    |                    |                 |                   |                   |                |                   | 12 |
| 2  | <b>201.123368</b> | 101.065322        | 183.112803     | 92.060039        | L    | 1279.729652        | 640.368464      | 1262.703103       | 631.855190        | 1261.719087    | 631.363182        | 11 |
| 3  | <b>314.207432</b> | 157.607354        | 296.196867     | 148.602071       | L    | <b>1166.645588</b> | 583.826432      | 1149.619039       | 575.313158        | 1148.635023    | 574.821150        | 10 |
| 4  | <b>443.250025</b> | 222.128650        | 425.239460     | 213.123368       | E    | <b>1053.561524</b> | 527.284400      | 1036.534975       | 518.771126        | 1035.550959    | 518.279117        | 9  |
| 5  | 540.302789        | 270.655033        | 522.292224     | 261.649750       | P    | <b>924.518931</b>  | 462.763104      | 907.492382        | 454.249829        | 906.508366     | 453.757821        | 8  |
| 6  | 687.371203        | <b>344.189240</b> | 669.360638     | 335.183957       | F    | <b>827.466167</b>  | 414.236722      | 810.439618        | 405.723447        | 809.455602     | 405.231439        | 7  |
| 7  | 786.439617        | 393.723447        | 768.429052     | 384.718164       | V    | <b>680.397753</b>  | 340.702515      | 663.371204        | 332.189240        | 662.387188     | 331.697232        | 6  |
| 8  | <b>949.502946</b> | 475.255111        | 931.492381     | 466.249829       | Y    | <b>581.329339</b>  | 291.168308      | 564.302790        | 282.655033        | 563.318774     | 282.163025        | 5  |
| 9  | 1062.587010       | 531.797143        | 1044.576445    | 522.791860       | L    | <b>418.266010</b>  | 209.636643      | 401.239461        | <b>201.123368</b> | 400.255445     | <b>200.631360</b> | 4  |
| 10 | 1133.624124       | 567.315700        | 1115.613559    | 558.310417       | A    | <b>305.181946</b>  | 153.094611      | 288.155397        | 144.581337        | 287.171381     | 144.089329        | 3  |
| 11 | 1220.656152       | 610.831714        | 1202.645587    | 601.826432       | S    | 234.144832         | 117.576054      | <b>217.118283</b> | 109.062780        | 216.134267     | 108.570772        | 2  |
| 12 |                   |                   |                |                  | K    | 147.112804         | 74.060040       | 130.086255        | 65.546765         |                |                   | 1  |

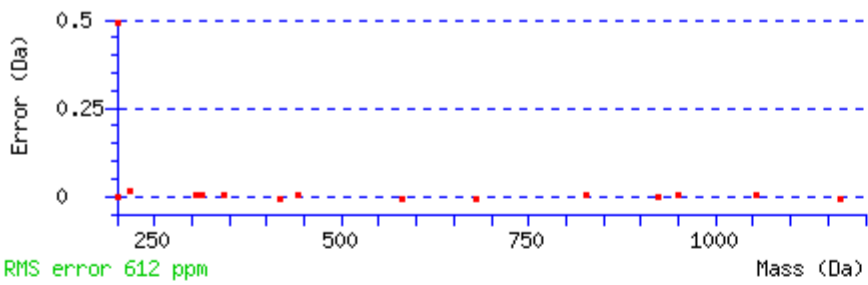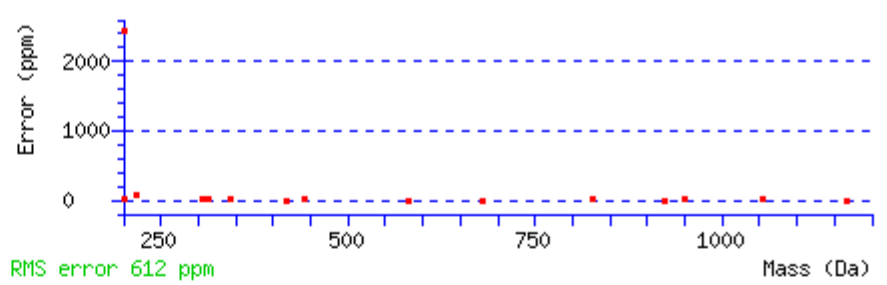

NCBI BLAST search of **SLLEPFVYLASK**

(Parameters: blastp, nr protein database, expect=20000, no filter, PAM30)

Other BLAST [web gateways](#)

All matches to this query

| Score | Mr(calc):   | Delta     | Sequence                     |
|-------|-------------|-----------|------------------------------|
| 48.3  | 1365.754379 | 0.003289  | <a href="#">SLLEPFVYLASK</a> |
| 1.9   | 1365.750381 | 0.007287  | <a href="#">SLPLPPLSPPR</a>  |
| 1.1   | 1365.761597 | -0.003929 | <a href="#">KDRPLPPPSSLK</a> |

Mascot: <http://www.matrixscience.com/>

# Mascot Search Results

## Peptide View

MS/MS Fragmentation of **SVFFGPDFITVTK**

Found in **NFU1\_HUMAN**, NFU1 iron-sulfur cluster scaffold homolog, mitochondrial OS=Homo sapiens GN=NFU1 PE=1 SV=2

Match to Query 39009: 1456.757728 from(729.386140,2+) rtinseconds(3625) index(47988)

Title: Locus:1.1.1.2994.41

Data file 2011-11-10 - TFD - EP 3-5.mgf

Click mouse within plot area to zoom in by factor of two about that point

Or, Plot from  to  Da

Label all possible matches  Label matches used for scoring

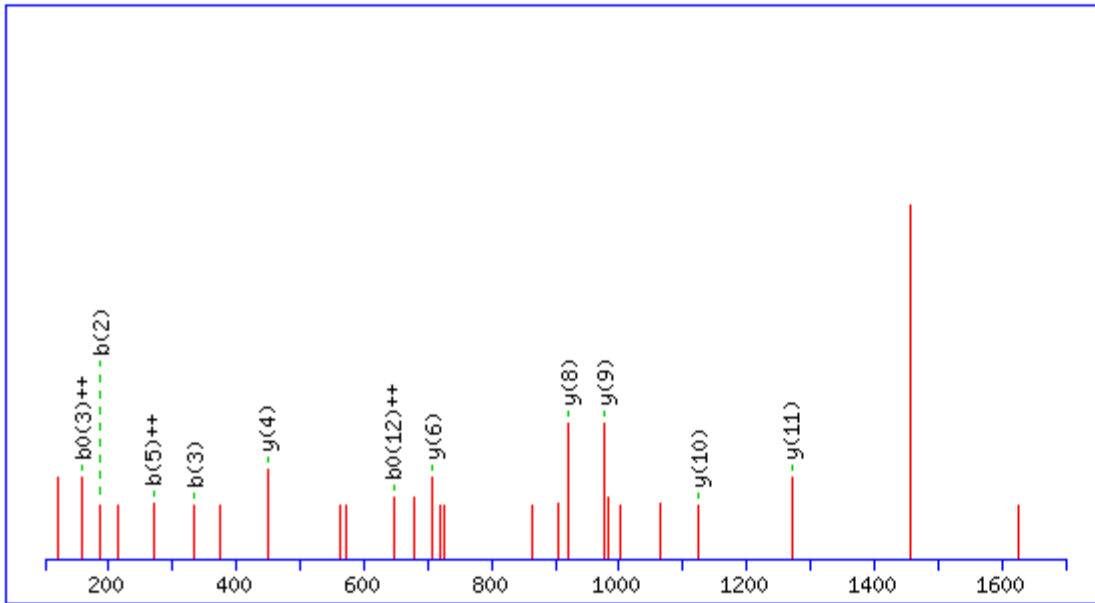

Monoisotopic mass of neutral peptide Mr(calc): 1456.760254

Fixed modifications: Propionamide (C) (apply to specified residues or termini only)

Ions Score: 31 Expect: 0.0032

Matches : 11/118 fragment ions using 21 most intense peaks [\(help\)](#)

| #  | b                 | b <sup>++</sup>   | b <sup>0</sup> | b <sup>0++</sup>  | Seq. | y                  | y <sup>++</sup> | y <sup>*</sup> | y <sup>*++</sup> | y <sup>0</sup> | y <sup>0++</sup> | #  |
|----|-------------------|-------------------|----------------|-------------------|------|--------------------|-----------------|----------------|------------------|----------------|------------------|----|
| 1  | 88.039304         | 44.523290         | 70.028739      | 35.518008         | S    |                    |                 |                |                  |                |                  | 13 |
| 2  | <b>187.107718</b> | 94.057497         | 169.097153     | 85.052214         | V    | 1370.735467        | 685.871372      | 1353.708918    | 677.358097       | 1352.724902    | 676.866089       | 12 |
| 3  | <b>334.176132</b> | 167.591704        | 316.165567     | <b>158.586422</b> | F    | <b>1271.667053</b> | 636.337165      | 1254.640504    | 627.823890       | 1253.656488    | 627.331882       | 11 |
| 4  | 481.244546        | 241.125911        | 463.233981     | 232.120628        | F    | <b>1124.598639</b> | 562.802958      | 1107.572090    | 554.289683       | 1106.588074    | 553.797675       | 10 |
| 5  | 538.266010        | <b>269.636643</b> | 520.255445     | 260.631361        | G    | <b>977.530225</b>  | 489.268751      | 960.503676     | 480.755476       | 959.519660     | 480.263468       | 9  |
| 6  | 635.318774        | 318.163025        | 617.308209     | 309.157743        | P    | <b>920.508761</b>  | 460.758019      | 903.482212     | 452.244744       | 902.498196     | 451.752736       | 8  |
| 7  | 750.345717        | 375.676497        | 732.335152     | 366.671214        | D    | 823.455997         | 412.231637      | 806.429448     | 403.718362       | 805.445432     | 403.226354       | 7  |
| 8  | 897.414131        | 449.210704        | 879.403566     | 440.205421        | F    | <b>708.429054</b>  | 354.718165      | 691.402505     | 346.204891       | 690.418489     | 345.712883       | 6  |
| 9  | 1010.498195       | 505.752736        | 992.487630     | 496.747453        | I    | 561.360640         | 281.183958      | 544.334091     | 272.670684       | 543.350075     | 272.178676       | 5  |
| 10 | 1111.545874       | 556.276575        | 1093.535309    | 547.271292        | T    | <b>448.276576</b>  | 224.641926      | 431.250027     | 216.128651       | 430.266011     | 215.636643       | 4  |
| 11 | 1210.614288       | 605.810782        | 1192.603723    | 596.805500        | V    | 347.228897         | 174.118087      | 330.202348     | 165.604812       | 329.218332     | 165.112804       | 3  |
| 12 | 1311.661967       | 656.334622        | 1293.651402    | <b>647.329339</b> | T    | 248.160483         | 124.583879      | 231.133934     | 116.070605       | 230.149918     | 115.578597       | 2  |
| 13 |                   |                   |                |                   | K    | 147.112804         | 74.060040       | 130.086255     | 65.546765        |                |                  | 1  |

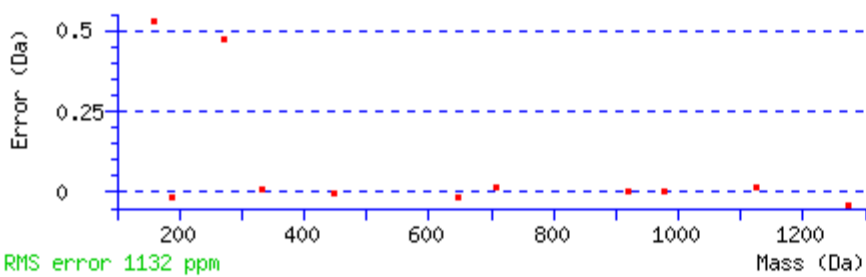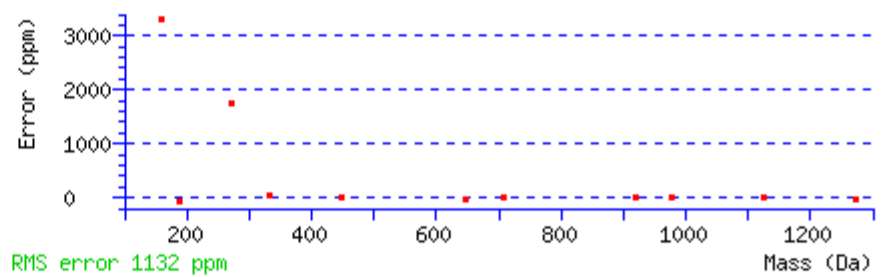

NCBI BLAST search of **SVFFGPDFITVTK**

(Parameters: blastp, nr protein database, expect=20000, no filter, PAM30)

Other BLAST [web gateways](#)

## All matches to this query

| Score | Mr(calc):   | Delta     | Sequence                      |
|-------|-------------|-----------|-------------------------------|
| 30.5  | 1456.760254 | -0.002526 | <a href="#">SVFFGPDFITVTK</a> |

Mascot: <http://www.matrixscience.com/>

# MASCOT Search Results

## Peptide View

MS/MS Fragmentation of **YLV PDLVQEYIEK**

Found in **NMNA1\_HUMAN**, Nicotinamide mononucleotide adenylyltransferase 1 OS=Homo sapiens GN=NMNAT1 PE=1 SV=1

Match to Query 51937: 1607.853908 from(804.934230,2+) rtinseconds(3959) index(58909)

Title: Locus:1.1.1.2916.23

Data file 2011-11-12 - TFD - EP 5-4.mgf

Click mouse within plot area to zoom in by factor of two about that point

Or, Plot from  to  Da

Label all possible matches  Label matches used for scoring

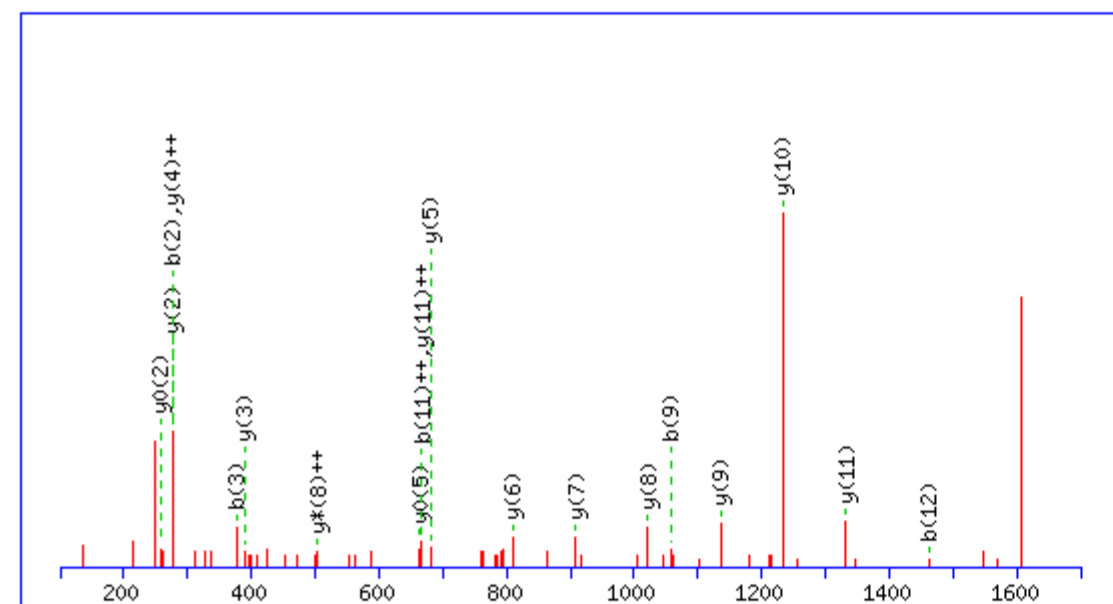

Monoisotopic mass of neutral peptide Mr(calc): 1607.844650

Fixed modifications: Propionamide (C) (apply to specified residues or termini only)

Ions Score: 41 Expect: 0.00084

Matches : 19/120 fragment ions using 43 most intense peaks [\(help\)](#)

| #  | b                  | b <sup>++</sup>   | b <sup>*</sup> | b <sup>*++</sup> | b <sup>0</sup> | b <sup>0++</sup> | Seq. | y                  | y <sup>++</sup>   | y <sup>*</sup> | y <sup>*++</sup>  | y <sup>0</sup>    | y <sup>0++</sup> | #  |
|----|--------------------|-------------------|----------------|------------------|----------------|------------------|------|--------------------|-------------------|----------------|-------------------|-------------------|------------------|----|
| 1  | 164.070605         | 82.538940         |                |                  |                |                  | Y    |                    |                   |                |                   |                   |                  | 13 |
| 2  | <b>277.154669</b>  | 139.080973        |                |                  |                |                  | L    | 1445.788624        | 723.397950        | 1428.762075    | 714.884676        | 1427.778059       | 714.392668       | 12 |
| 3  | <b>376.223083</b>  | 188.615180        |                |                  |                |                  | V    | <b>1332.704560</b> | <b>666.855918</b> | 1315.678011    | 658.342644        | 1314.693995       | 657.850636       | 11 |
| 4  | 473.275847         | 237.141562        |                |                  |                |                  | P    | <b>1233.636146</b> | 617.321711        | 1216.609597    | 608.808437        | 1215.625581       | 608.316429       | 10 |
| 5  | 588.302790         | 294.655033        |                |                  | 570.292225     | 285.649751       | D    | <b>1136.583382</b> | 568.795329        | 1119.556833    | 560.282055        | 1118.572817       | 559.790047       | 9  |
| 6  | 701.386854         | 351.197065        |                |                  | 683.376289     | 342.191783       | L    | <b>1021.556439</b> | 511.281858        | 1004.529890    | <b>502.768583</b> | 1003.545874       | 502.276575       | 8  |
| 7  | 800.455268         | 400.731272        |                |                  | 782.444703     | 391.725990       | V    | <b>908.472375</b>  | 454.739826        | 891.445826     | 446.226551        | 890.461810        | 445.734543       | 7  |
| 8  | 928.513846         | 464.760561        | 911.487297     | 456.247287       | 910.503281     | 455.755279       | Q    | <b>809.403961</b>  | 405.205619        | 792.377412     | 396.692344        | 791.393396        | 396.200336       | 6  |
| 9  | <b>1057.556439</b> | 529.281858        | 1040.529890    | 520.768583       | 1039.545874    | 520.276575       | E    | <b>681.345383</b>  | 341.176330        | 664.318834     | 332.663055        | <b>663.334818</b> | 332.171047       | 5  |
| 10 | 1220.619768        | 610.813522        | 1203.593219    | 602.300248       | 1202.609203    | 601.808240       | Y    | 552.302790         | <b>276.655033</b> | 535.276241     | 268.141758        | 534.292225        | 267.649750       | 4  |
| 11 | 1333.703832        | <b>667.355554</b> | 1316.677283    | 658.842280       | 1315.693267    | 658.350272       | I    | <b>389.239461</b>  | 195.123368        | 372.212912     | 186.610094        | 371.228896        | 186.118086       | 3  |
| 12 | <b>1462.746425</b> | 731.876851        | 1445.719876    | 723.363576       | 1444.735860    | 722.871568       | E    | <b>276.155397</b>  | 138.581336        | 259.128848     | 130.068062        | <b>258.144832</b> | 129.576054       | 2  |
| 13 |                    |                   |                |                  |                |                  | K    | 147.112804         | 74.060040         | 130.086255     | 65.546765         |                   |                  | 1  |

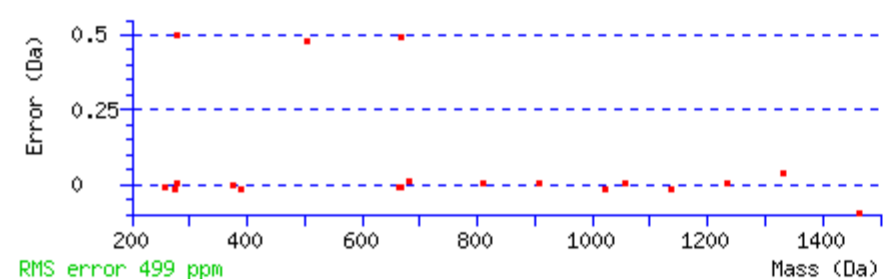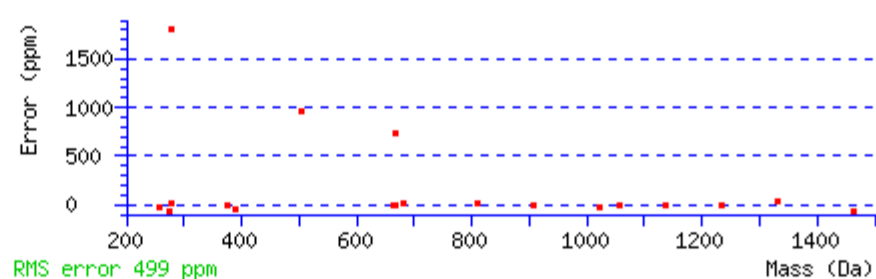

NCBI BLAST search of **YLV PDLVQEYIEK**

(Parameters: blastp, nr protein database, expect=20000, no filter, PAM30)

Other BLAST [web gateways](#)

All matches to this query

| Score | Mr(calc):   | Delta     | Sequence                           |
|-------|-------------|-----------|------------------------------------|
| 41.2  | 1607.844650 | 0.009258  | <a href="#">YLV PDLVQEYIEK</a>     |
| 7.9   | 1607.841537 | 0.012371  | <a href="#">MVGIMGTVLLTGGLK</a>    |
| 5.7   | 1607.863113 | -0.009205 | <a href="#">GATPAPPKGAGAVASQTK</a> |
| 3.7   | 1607.840652 | 0.013256  | <a href="#">TLLPNTTLTYDTQK</a>     |
| 1.0   | 1607.867111 | -0.013203 | <a href="#">YIEIYVQKVNPSR</a>      |

Mascot: <http://www.matrixscience.com/>

**Peptide View**

MS/MS Fragmentation of **DNLQLPLQFLSR**  
 Found in **NPC1\_HUMAN**, Niemann-Pick C1 protein OS=Homo sapiens GN=NPC1 PE=1 SV=2

Match to Query 43578: 1442.792288 from(722.403420,2+) rtinseconds(3860) index(56382)  
 Title: Locus:1.1.1.2801.39  
 Data file 2011-11-10 - TFD - EP 4-1.mgf

Click mouse within plot area to zoom in by factor of two about that point  
 Or, Plot from  to  Da   
 Label all possible matches  Label matches used for scoring

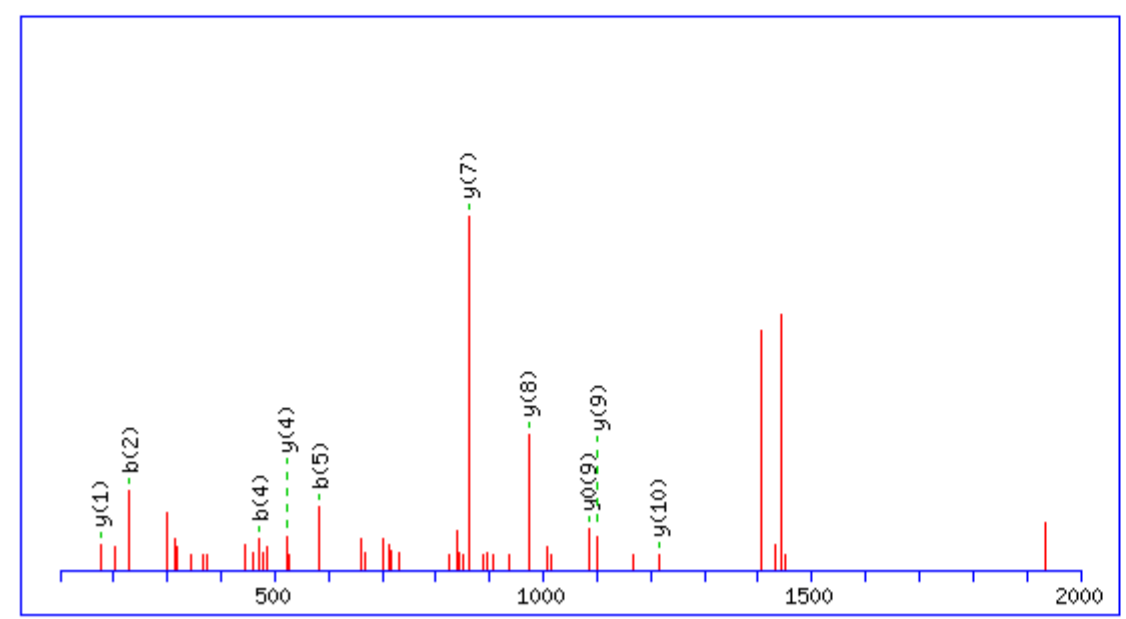

Monoisotopic mass of neutral peptide **Mr(calcd): 1442.788147**  
 Fixed modifications: Propionamide (C) (apply to specified residues or termini only)  
 Ions Score: 30 Expect: 0.0091  
 Matches : 10/128 fragment ions using 23 most intense peaks ([help](#))

| #  | b                 | b <sup>++</sup> | b <sup>+</sup> | b <sup>*++</sup> | b <sup>0</sup> | b <sup>0++</sup> | Seq. | y                  | y <sup>++</sup> | y <sup>+</sup> | y <sup>*++</sup> | y <sup>0</sup>     | y <sup>0++</sup> | #  |
|----|-------------------|-----------------|----------------|------------------|----------------|------------------|------|--------------------|-----------------|----------------|------------------|--------------------|------------------|----|
| 1  | 116.034219        | 58.520748       |                |                  | 98.023654      | 49.515465        | D    |                    |                 |                |                  |                    |                  | 12 |
| 2  | <b>230.077146</b> | 115.542211      | 213.050597     | 107.028937       | 212.066581     | 106.536928       | N    | 1328.768497        | 664.887887      | 1311.741948    | 656.374612       | 1310.757932        | 655.882604       | 11 |
| 3  | 343.161210        | 172.084243      | 326.134661     | 163.570968       | 325.150645     | 163.078960       | L    | <b>1214.725570</b> | 607.866423      | 1197.699021    | 599.353149       | 1196.715005        | 598.861141       | 10 |
| 4  | <b>471.219788</b> | 236.113532      | 454.193239     | 227.600258       | 453.209223     | 227.108250       | Q    | <b>1101.641506</b> | 551.324391      | 1084.614957    | 542.811117       | <b>1083.630941</b> | 542.319109       | 9  |
| 5  | <b>584.303852</b> | 292.655564      | 567.277303     | 284.142290       | 566.293287     | 283.650282       | L    | <b>973.582928</b>  | 487.295102      | 956.556379     | 478.781828       | 955.572363         | 478.289820       | 8  |
| 6  | 681.356616        | 341.181946      | 664.330067     | 332.668672       | 663.346051     | 332.176664       | P    | <b>860.498864</b>  | 430.753070      | 843.472315     | 422.239796       | 842.488299         | 421.747788       | 7  |
| 7  | 794.440680        | 397.723978      | 777.414131     | 389.210704       | 776.430115     | 388.718696       | L    | 763.446100         | 382.226688      | 746.419551     | 373.713414       | 745.435535         | 373.221406       | 6  |
| 8  | 922.499258        | 461.753267      | 905.472709     | 453.239993       | 904.488693     | 452.747985       | Q    | 650.362036         | 325.684656      | 633.335487     | 317.171382       | 632.351471         | 316.679374       | 5  |
| 9  | 1069.567672       | 535.287474      | 1052.541123    | 526.774200       | 1051.557107    | 526.282192       | F    | <b>522.303458</b>  | 261.655367      | 505.276909     | 253.142093       | 504.292893         | 252.650085       | 4  |
| 10 | 1182.651736       | 591.829506      | 1165.625187    | 583.316232       | 1164.641171    | 582.824224       | L    | 375.235044         | 188.121160      | 358.208495     | 179.607885       | 357.224479         | 179.115877       | 3  |
| 11 | 1269.683764       | 635.345520      | 1252.657215    | 626.832246       | 1251.673199    | 626.340238       | S    | 262.150980         | 131.579128      | 245.124431     | 123.065854       | 244.140415         | 122.573846       | 2  |
| 12 |                   |                 |                |                  |                |                  | R    | <b>175.118952</b>  | 88.063114       | 158.092403     | 79.549839        |                    |                  | 1  |

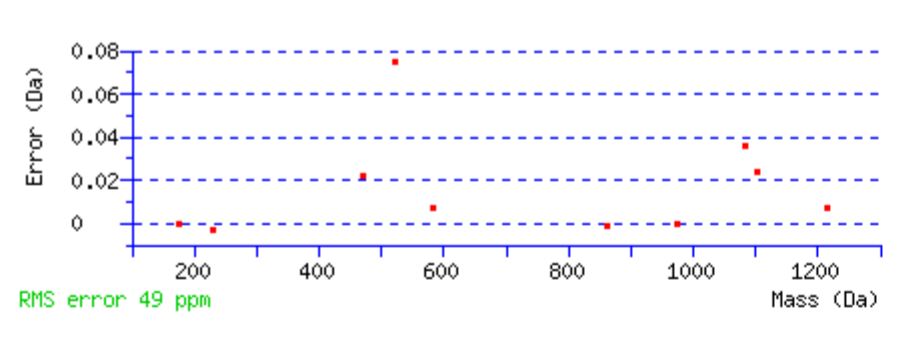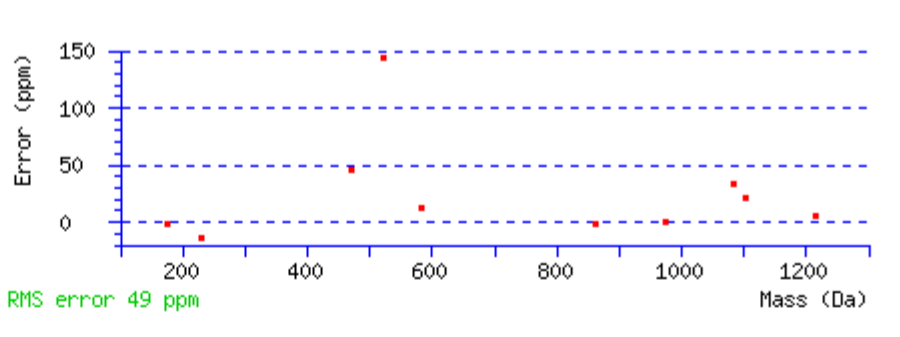

NCBI BLAST search of [DNLQLPLQFLSR](#)  
 (Parameters: blastp, nr protein database, expect=20000, no filter, PAM30)  
 Other BLAST [web gateways](#)

**All matches to this query**

| Score | Mr(calcd):  | Delta    | Sequence                       |
|-------|-------------|----------|--------------------------------|
| 30.1  | 1442.788147 | 0.004141 | <a href="#">DNLQLPLQFLSR</a>   |
| 11.4  | 1442.788132 | 0.004156 | <a href="#">LPEDLKNFRPAK</a>   |
| 6.3   | 1442.780258 | 0.012030 | <a href="#">MLPLLEVAEKER</a>   |
| 6.3   | 1442.780258 | 0.012030 | <a href="#">MLPLLEVAEKER</a>   |
| 2.5   | 1442.788162 | 0.004126 | <a href="#">DLEPPIVARFVR</a>   |
| 1.4   | 1442.788147 | 0.004141 | <a href="#">VSPLAAFLASAPQR</a> |



# {MATRIX} SCIENCE Mascot Search Results

## Peptide View

MS/MS Fragmentation of **LYISGPNK**

Found in **NPCL1\_HUMAN**, Niemann-Pick C1-like protein 1 OS=Homo sapiens GN=NPCL1 PE=1 SV=1

Match to Query 5786: 906.482008 from(454.248280,2+) rtinseconds(1573) index(3759)

Title: Locus:1.1.1.2247.7

Data file 2011-11-10 - TFD - EP 3-8.mgf

Click mouse within plot area to zoom in by factor of two about that point

Or, Plot from  to  Da

Label all possible matches  Label matches used for scoring

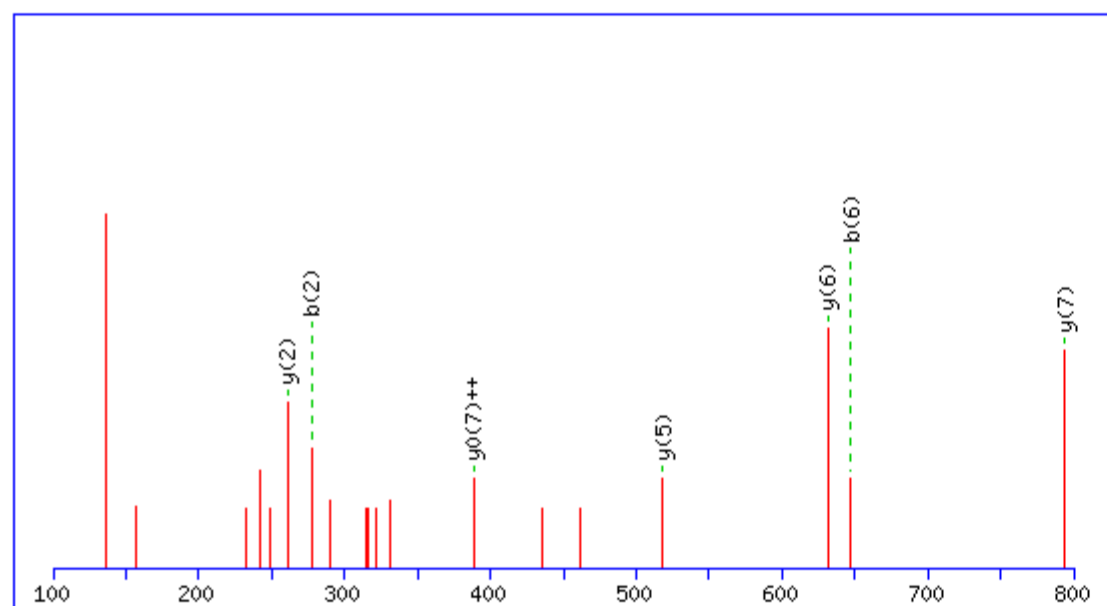

Monoisotopic mass of neutral peptide Mr(calc): 906.481064

Fixed modifications: Propionamide (C) (apply to specified residues or termini only)

Variable modifications:

P6 : Oxidation (P)

Ions Score: 31 Expect: 0.0057

Matches : 7/58 fragment ions using 10 most intense peaks ([help](#))

| # | b                 | b <sup>++</sup> | b <sup>*</sup> | b <sup>+++</sup> | b <sup>0</sup> | b <sup>0++</sup> | Seq. | y                 | y <sup>++</sup> | y <sup>*</sup> | y <sup>+++</sup> | y <sup>0</sup> | y <sup>0++</sup>  | # |
|---|-------------------|-----------------|----------------|------------------|----------------|------------------|------|-------------------|-----------------|----------------|------------------|----------------|-------------------|---|
| 1 | 114.091340        | 57.549308       |                |                  |                |                  | L    |                   |                 |                |                  |                |                   | 8 |
| 2 | <b>277.154669</b> | 139.080973      |                |                  |                |                  | Y    | <b>794.404295</b> | 397.705786      | 777.377746     | 389.192511       | 776.393730     | <b>388.700503</b> | 7 |
| 3 | 390.238733        | 195.623005      |                |                  |                |                  | I    | <b>631.340966</b> | 316.174121      | 614.314417     | 307.660847       | 613.330401     | 307.168839        | 6 |
| 4 | 477.270761        | 239.139019      |                |                  | 459.260196     | 230.133736       | S    | <b>518.256902</b> | 259.632089      | 501.230353     | 251.118815       | 500.246337     | 250.626807        | 5 |
| 5 | 534.292225        | 267.649751      |                |                  | 516.281660     | 258.644468       | G    | 431.224874        | 216.116075      | 414.198325     | 207.602801       |                |                   | 4 |
| 6 | <b>647.339904</b> | 324.173590      |                |                  | 629.329339     | 315.168308       | P    | 374.203410        | 187.605343      | 357.176861     | 179.092068       |                |                   | 3 |
| 7 | 761.382831        | 381.195054      | 744.356282     | 372.681779       | 743.372266     | 372.189771       | N    | <b>261.155731</b> | 131.081503      | 244.129182     | 122.568229       |                |                   | 2 |
| 8 |                   |                 |                |                  |                |                  | K    | 147.112804        | 74.060040       | 130.086255     | 65.546765        |                |                   | 1 |

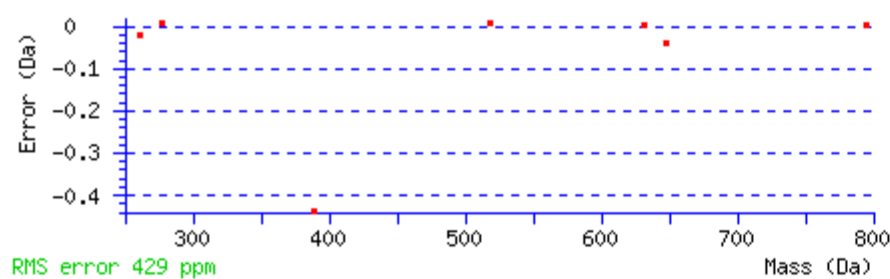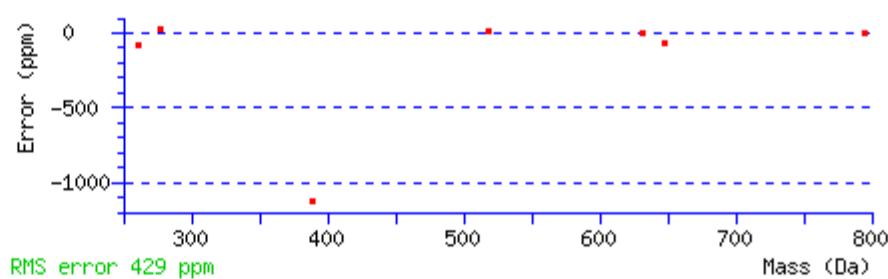

NCBI BLAST search of **LYISGPNK**

(Parameters: blastp, nr protein database, expect=20000, no filter, PAM30)

Other BLAST [web gateways](#)

## All matches to this query

| Score | Mr(calc):  | Delta     | Sequence                 |
|-------|------------|-----------|--------------------------|
| 31.4  | 906.481064 | 0.000944  | <a href="#">LYISGPNK</a> |
| 8.1   | 906.481079 | 0.000929  | <a href="#">LFDAVNTK</a> |
| 7.9   | 906.484436 | -0.002428 | <a href="#">LSVMSINK</a> |
| 7.0   | 906.481049 | 0.000959  | <a href="#">KLFEENK</a>  |
| 1.8   | 906.481079 | 0.000929  | <a href="#">LFSKPDGK</a> |
| 1.7   | 906.481064 | 0.000944  | <a href="#">IYDPQKK</a>  |

Mascot: <http://www.matrixscience.com/>

# MASCOT SCIENCE Mascot Search Results

## Peptide View

MS/MS Fragmentation of **VLESELK**

Found in **NRK\_HUMAN**, Nik-related protein kinase OS=Homo sapiens GN=NRK PE=2 SV=2

Match to Query 24020: 816.461868 from(409.238210,2+) rtinseconds(1634) index(422862)

Title: Locus:1.1.1.963.3

Data file C:\Program Files (x86)\Matrix Science\Mascot Daemon\mgf3 TFD - Epitel - R2\mascot\_daemon\_merge.mgf

Click mouse within plot area to zoom in by factor of two about that point

Or, Plot from  to  Da

Label all possible matches  Label matches used for scoring

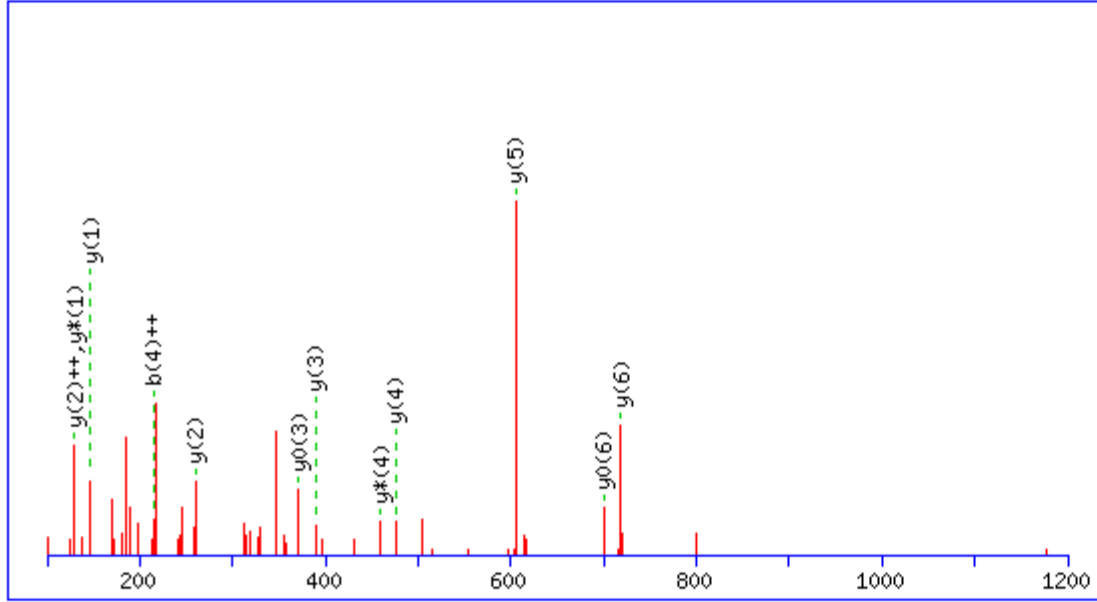

Monoisotopic mass of neutral peptide Mr(calc): 816.459259

Fixed modifications: Carbamidomethyl (C) (apply to specified residues or termini only)

Ions Score: 33 Expect: 0.0038

Matches : 12/52 fragment ions using 27 most intense peaks [\(help\)](#)

| # | b          | b <sup>++</sup>   | b <sup>0</sup> | b <sup>0++</sup> | Seq. | y                 | y <sup>++</sup>   | y <sup>*</sup>    | y <sup>*++</sup> | y <sup>0</sup>    | y <sup>0++</sup> | # |
|---|------------|-------------------|----------------|------------------|------|-------------------|-------------------|-------------------|------------------|-------------------|------------------|---|
| 1 | 100.075690 | 50.541483         |                |                  | V    |                   |                   |                   |                  |                   |                  | 7 |
| 2 | 213.159754 | 107.083515        |                |                  | L    | <b>718.398146</b> | 359.702711        | 701.371597        | 351.189437       | <b>700.387581</b> | 350.697429       | 6 |
| 3 | 342.202347 | 171.604811        | 324.191782     | 162.599529       | E    | <b>605.314082</b> | 303.160679        | 588.287533        | 294.647405       | 587.303517        | 294.155397       | 5 |
| 4 | 429.234375 | <b>215.120825</b> | 411.223810     | 206.115543       | S    | <b>476.271489</b> | 238.639382        | <b>459.244940</b> | 230.126108       | 458.260924        | 229.634100       | 4 |
| 5 | 558.276968 | 279.642122        | 540.266403     | 270.636840       | E    | <b>389.239461</b> | 195.123369        | 372.212912        | 186.610094       | <b>371.228896</b> | 186.118086       | 3 |
| 6 | 671.361032 | 336.184154        | 653.350467     | 327.178872       | L    | <b>260.196868</b> | <b>130.602072</b> | 243.170319        | 122.088798       |                   |                  | 2 |
| 7 |            |                   |                |                  | K    | <b>147.112804</b> | 74.060040         | <b>130.086255</b> | 65.546765        |                   |                  | 1 |

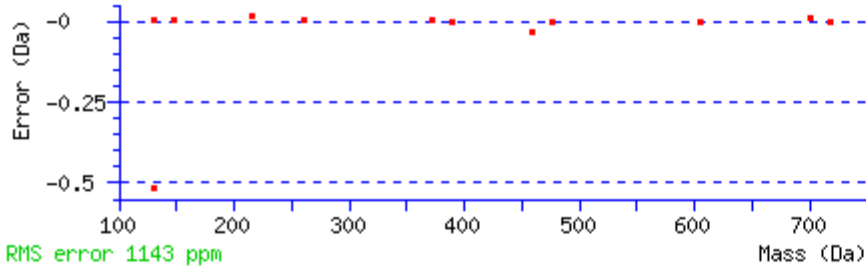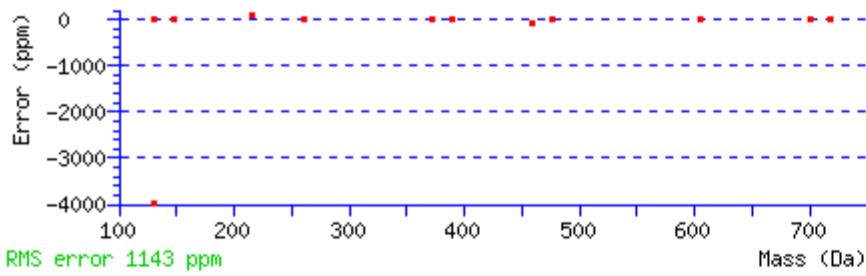

NCBI BLAST search of [VLESELK](#)

(Parameters: blastp, nr protein database, expect=20000, no filter, PAM30)

Other BLAST [web gateways](#)

## All matches to this query

| Score | Mr(calc):  | Delta    | Sequence                |
|-------|------------|----------|-------------------------|
| 33.3  | 816.459259 | 0.002609 | <a href="#">VLESELK</a> |
| 31.4  | 816.459274 | 0.002594 | <a href="#">VLTDELK</a> |
| 16.0  | 816.459274 | 0.002594 | <a href="#">TLDEVLK</a> |
| 15.8  | 816.459274 | 0.002594 | <a href="#">VLETVEK</a> |
| 13.1  | 816.459274 | 0.002594 | <a href="#">ITVDELK</a> |
| 13.1  | 816.459274 | 0.002594 | <a href="#">LTVDELK</a> |
| 11.0  | 816.459274 | 0.002594 | <a href="#">VDITIEK</a> |
| 10.4  | 816.459274 | 0.002594 | <a href="#">VDLETLK</a> |
| 10.1  | 816.459259 | 0.002609 | <a href="#">VSLEELK</a> |
| 9.7   | 816.459259 | 0.002609 | <a href="#">DLISELK</a> |

# MASCOT Search Results

## Peptide View

MS/MS Fragmentation of **LSAKPAPPKPEPKPK**

Found in **HMG2\_HUMAN**, Non-histone chromosomal protein HMG-17 OS=Homo sapiens GN=HMG2 PE=1 SV=3

Match to Query 45402: 1583.938332 from(528.986720,3+) rtinseconds(822) index(655)

Title: Locus:1.1.1.1603.6

Data file 2011-11-13 - TFD - EP 7-6.mgf

Click mouse within plot area to zoom in by factor of two about that point

Or, Plot from  to  Da

Label all possible matches  Label matches used for scoring

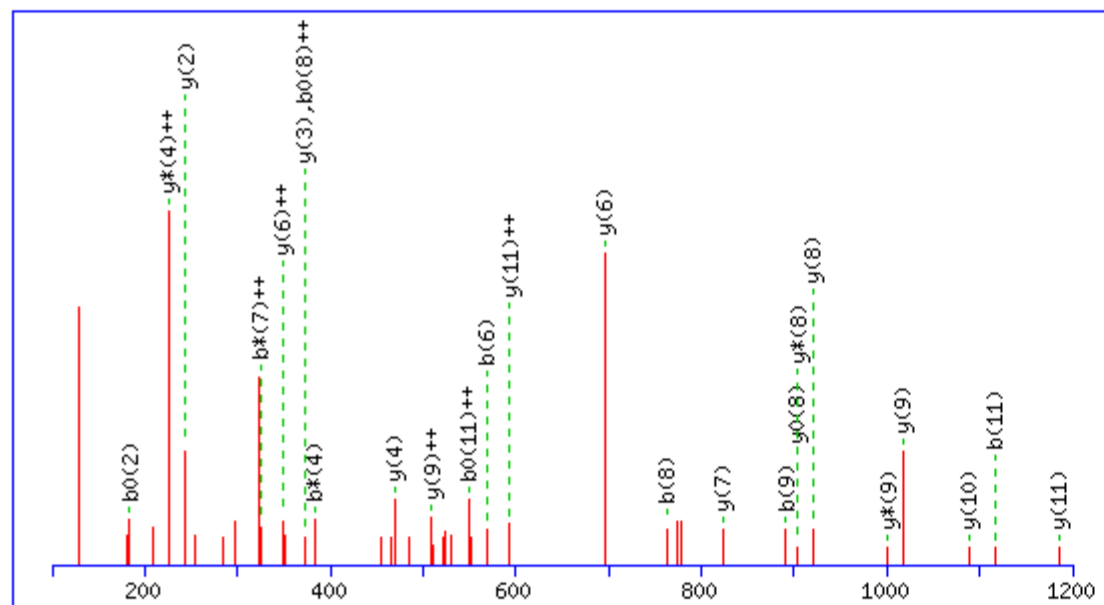

Monoisotopic mass of neutral peptide Mr(calc): 1583.939865

Fixed modifications: Propionamide (C) (apply to specified residues or termini only)

Ions Score: 68 Expect: 2.6e-007

Matches : 25/152 fragment ions using 34 most intense peaks [\(help\)](#)

| #  | b           | b <sup>++</sup> | b <sup>*</sup> | b <sup>*++</sup> | b <sup>0</sup> | b <sup>0++</sup> | Seq. | y           | y <sup>++</sup> | y <sup>*</sup> | y <sup>*++</sup> | y <sup>0</sup> | y <sup>0++</sup> | #  |
|----|-------------|-----------------|----------------|------------------|----------------|------------------|------|-------------|-----------------|----------------|------------------|----------------|------------------|----|
| 1  | 114.091340  | 57.549308       |                |                  |                |                  | L    |             |                 |                |                  |                |                  | 15 |
| 2  | 201.123368  | 101.065322      |                |                  | 183.112803     | 92.060039        | S    | 1471.863126 | 736.435201      | 1454.836577    | 727.921927       | 1453.852561    | 727.429919       | 14 |
| 3  | 272.160482  | 136.583879      |                |                  | 254.149917     | 127.578596       | A    | 1384.831098 | 692.919187      | 1367.804549    | 684.405913       | 1366.820533    | 683.913905       | 13 |
| 4  | 400.255445  | 200.631360      | 383.228896     | 192.118086       | 382.244880     | 191.626078       | K    | 1313.793984 | 657.400630      | 1296.767435    | 648.887356       | 1295.783419    | 648.395348       | 12 |
| 5  | 497.308209  | 249.157742      | 480.281660     | 240.644468       | 479.297644     | 240.152460       | P    | 1185.699021 | 593.353149      | 1168.672472    | 584.839874       | 1167.688456    | 584.347866       | 11 |
| 6  | 568.345323  | 284.676300      | 551.318774     | 276.163025       | 550.334758     | 275.671017       | A    | 1088.646257 | 544.826767      | 1071.619708    | 536.313492       | 1070.635692    | 535.821484       | 10 |
| 7  | 665.398087  | 333.202682      | 648.371538     | 324.689407       | 647.387522     | 324.197399       | P    | 1017.609143 | 509.308210      | 1000.582594    | 500.794935       | 999.598578     | 500.302927       | 9  |
| 8  | 762.450851  | 381.729064      | 745.424302     | 373.215789       | 744.440286     | 372.723781       | P    | 920.556379  | 460.781828      | 903.529830     | 452.268553       | 902.545814     | 451.776545       | 8  |
| 9  | 890.545814  | 445.776545      | 873.519265     | 437.263271       | 872.535249     | 436.771263       | K    | 823.503615  | 412.255446      | 806.477066     | 403.742171       | 805.493050     | 403.250163       | 7  |
| 10 | 987.598578  | 494.302927      | 970.572029     | 485.789653       | 969.588013     | 485.297645       | P    | 695.408652  | 348.207964      | 678.382103     | 339.694690       | 677.398087     | 339.202682       | 6  |
| 11 | 1116.641171 | 558.824224      | 1099.614622    | 550.310949       | 1098.630606    | 549.818941       | E    | 598.355888  | 299.681582      | 581.329339     | 291.168308       | 580.345323     | 290.676300       | 5  |
| 12 | 1213.693935 | 607.350606      | 1196.667386    | 598.837331       | 1195.683370    | 598.345323       | P    | 469.313295  | 235.160286      | 452.286746     | 226.647011       |                |                  | 4  |
| 13 | 1341.788898 | 671.398087      | 1324.762349    | 662.884813       | 1323.778333    | 662.392805       | K    | 372.260531  | 186.633904      | 355.233982     | 178.120629       |                |                  | 3  |
| 14 | 1438.841662 | 719.924469      | 1421.815113    | 711.411195       | 1420.831097    | 710.919187       | P    | 244.165568  | 122.586422      | 227.139019     | 114.073148       |                |                  | 2  |
| 15 |             |                 |                |                  |                |                  | K    | 147.112804  | 74.060040       | 130.086255     | 65.546765        |                |                  | 1  |

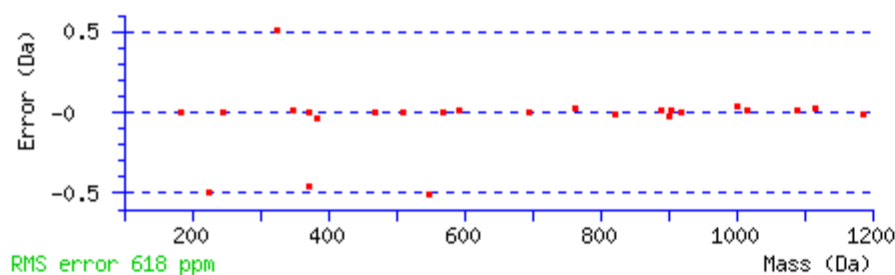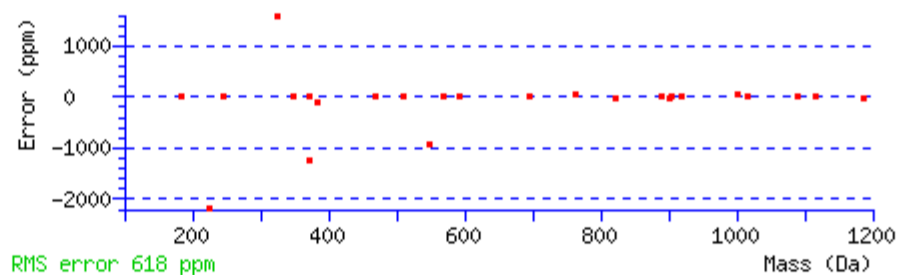

NCBI BLAST search of **LSAKPAPPKPEPKPK**

(Parameters: blastp, nr protein database, expect=20000, no filter, PAM30)

Other BLAST [web gateways](#)

All matches to this query

| Score | Mr(calc):   | Delta     | Sequence                        |
|-------|-------------|-----------|---------------------------------|
| 68.2  | 1583.939865 | -0.001533 | <a href="#">LSAKPAPPKPEPKPK</a> |

Mascot: <http://www.matrixscience.com/>

# MASCOT SCIENCE Mascot Search Results

## Peptide View

MS/MS Fragmentation of **TVIAQHHVAPR**

Found in **NCRP1\_HUMAN**, Non-specific cytotoxic cell receptor protein 1 homolog OS=Homo sapiens GN=NCCRP1 PE=1 SV=1

Match to Query 554367: 1227.682812 from(410.234880,3+) rtinseconds(865) index(897326)

Title: Locus:1.1.1.727.4

Data file C:\Program Files (x86)\Matrix Science\Mascot Daemon\mgf3 TFD - Epitel - R2\mascot\_daemon\_merge.mgf

Click mouse within plot area to zoom in by factor of two about that point

Or, Plot from  to  Da

Label all possible matches  Label matches used for scoring

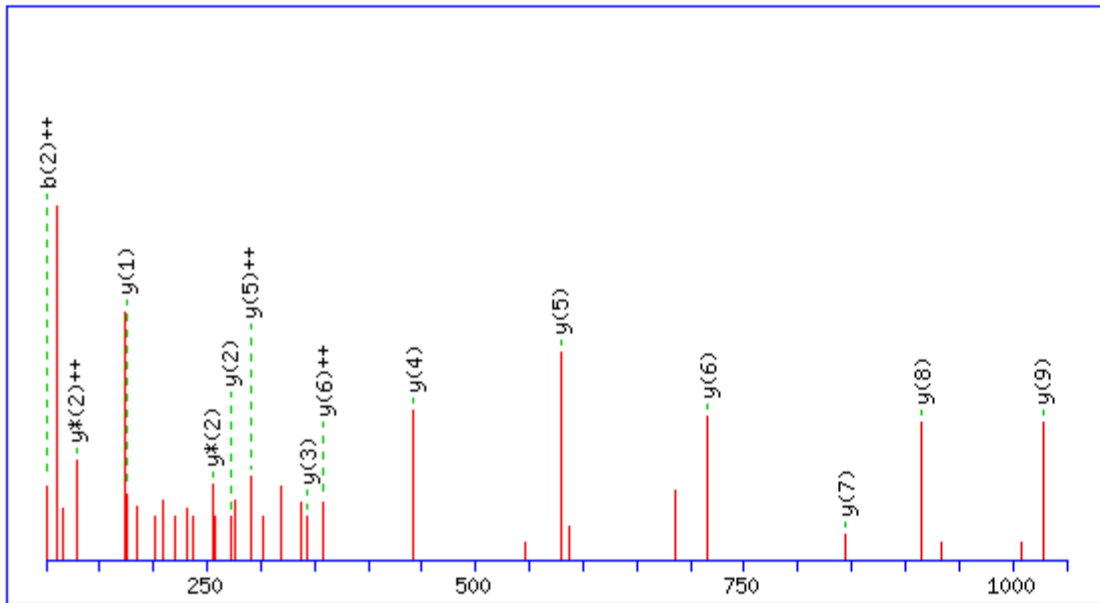

Monoisotopic mass of neutral peptide  $M_r(\text{calc})$ : 1227.683640

Fixed modifications: Carbamidomethyl (C) (apply to specified residues or termini only)

Ions Score: 51 Expect: 0.00017

Matches : 14/92 fragment ions using 33 most intense peaks [\(help\)](#)

| #  | b           | b <sup>++</sup> | b <sup>*</sup> | b <sup>*++</sup> | b <sup>0</sup> | b <sup>0++</sup> | Seq. | y           | y <sup>++</sup> | y <sup>*</sup> | y <sup>*++</sup> | #  |
|----|-------------|-----------------|----------------|------------------|----------------|------------------|------|-------------|-----------------|----------------|------------------|----|
| 1  | 102.054955  | 51.531116       |                |                  | 84.044390      | 42.525833        | T    |             |                 |                |                  | 11 |
| 2  | 201.123369  | 101.065322      |                |                  | 183.112804     | 92.060040        | V    | 1127.643238 | 564.325257      | 1110.616689    | 555.811983       | 10 |
| 3  | 314.207433  | 157.607354      |                |                  | 296.196868     | 148.602072       | I    | 1028.574824 | 514.791050      | 1011.548275    | 506.277776       | 9  |
| 4  | 385.244547  | 193.125911      |                |                  | 367.233982     | 184.120629       | A    | 915.490760  | 458.249018      | 898.464211     | 449.735743       | 8  |
| 5  | 513.303125  | 257.155201      | 496.276576     | 248.641926       | 495.292560     | 248.149918       | Q    | 844.453646  | 422.730461      | 827.427097     | 414.217186       | 7  |
| 6  | 650.362037  | 325.684657      | 633.335488     | 317.171382       | 632.351472     | 316.679374       | H    | 716.395068  | 358.701172      | 699.368519     | 350.187897       | 6  |
| 7  | 787.420949  | 394.214113      | 770.394400     | 385.700838       | 769.410384     | 385.208830       | H    | 579.336156  | 290.171716      | 562.309607     | 281.658441       | 5  |
| 8  | 886.489363  | 443.748319      | 869.462814     | 435.235045       | 868.478798     | 434.743037       | V    | 442.277244  | 221.642260      | 425.250695     | 213.128985       | 4  |
| 9  | 957.526477  | 479.266876      | 940.499928     | 470.753602       | 939.515912     | 470.261594       | A    | 343.208830  | 172.108053      | 326.182281     | 163.594778       | 3  |
| 10 | 1054.579241 | 527.793258      | 1037.552692    | 519.279984       | 1036.568676    | 518.787976       | P    | 272.171716  | 136.589496      | 255.145167     | 128.076221       | 2  |
| 11 |             |                 |                |                  |                |                  | R    | 175.118952  | 88.063114       | 158.092403     | 79.549839        | 1  |

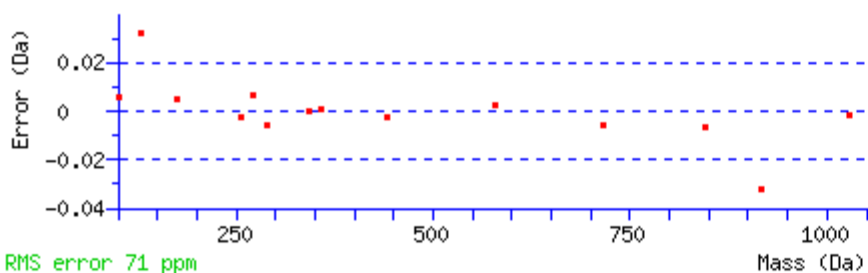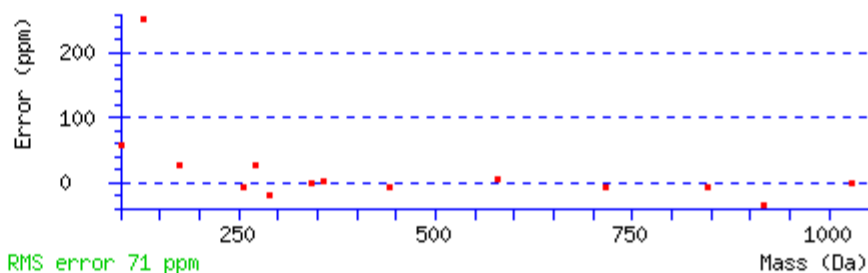

NCBI BLAST search of [TVIAQHHVAPR](#)

(Parameters: blastp, nr protein database, expect=20000, no filter, PAM30)

Other BLAST [web gateways](#)

## All matches to this query

| Score | $M_r(\text{calc})$ : | Delta     | Sequence                     |
|-------|----------------------|-----------|------------------------------|
| 51.4  | 1227.683640          | -0.000828 | <a href="#">TVIAQHHVAPR</a>  |
| 12.9  | 1227.682297          | 0.000515  | <a href="#">VTALVPSEAAVR</a> |
| 10.0  | 1227.671051          | 0.011761  | <a href="#">ALDTLLEQTPK</a>  |
| 9.6   | 1227.682281          | 0.000531  | <a href="#">TVIQEALALDR</a>  |
| 6.7   | 1227.682281          | 0.000531  | <a href="#">LLSASPVDAAIR</a> |
| 4.3   | 1227.693527          | -0.010715 | <a href="#">ATLVQDGIKGR</a>  |
| 2.5   | 1227.693497          | -0.010685 | <a href="#">AIQLNNQTKAK</a>  |

Mascot: <http://www.matrixscience.com/>

Peptide View

MS/MS Fragmentation of HLVMGDIPAAVNAFQEAASLLGK

Found in NASP\_HUMAN, Nuclear autoantigenic sperm protein OS=Homo sapiens GN=NASP PE=1 SV=2

Match to Query 69874: 2367.224532 from(790.082120,3+) rtinseconds(4346) index(65484)

Title: Locus:1.1.1.3029.34

Data file 2011-11-12 - TFD - EP 6-2.mgf

Click mouse within plot area to zoom in by factor of two about that point

Or, Plot from 0 to 2200 Da Full range

Label all possible matches Label matches used for scoring

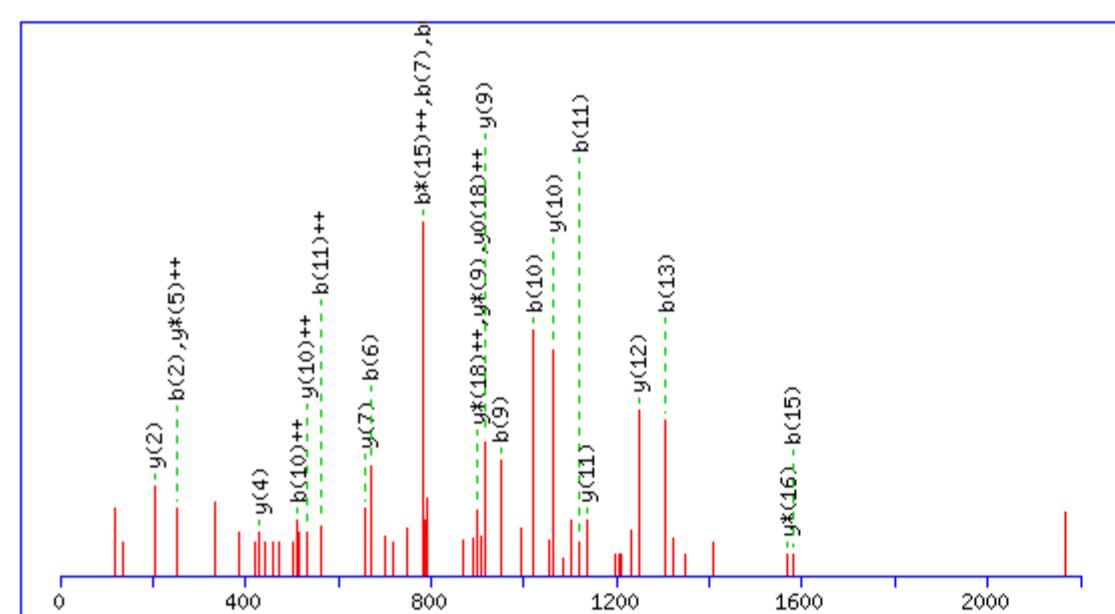

Monoisotopic mass of neutral peptide Mr(calc): 2367.225647
Fixed modifications: Propionamide (C)
Variable modifications: M4: Oxidation (M)
Ions Score: 65 Expect: 1.2e-006
Matches: 25/336 fragment ions using 28 most intense peaks

Table with columns: #, b, b++, b\*, b\*+, b0, b0+, Seq., y, y++, y\*, y\*+, y0, y0+, #. Contains 23 rows of peptide fragmentation data.

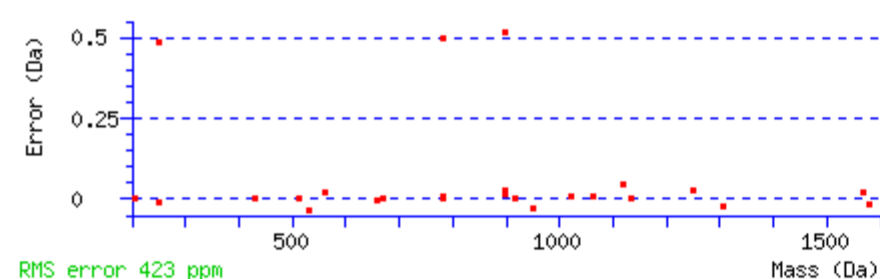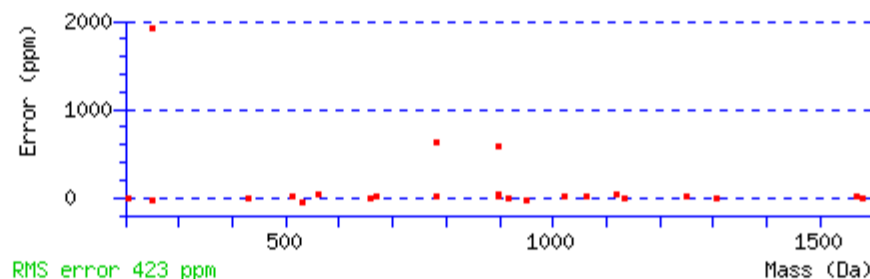

NCBI BLAST search of HLVMGDIPAAVNAFQEAASLLGK
Parameters: blastp, nr protein database, expect=20000, no filter, PAM30
Other BLAST web gateways

All matches to this query

Table with columns: Score, Mr(calc):, Delta, Sequence. Lists top matches for the query.

**Peptide View**

MS/MS Fragmentation of **TFPFLEGLR**

Found in **LY10L\_HUMAN**, Nuclear body protein SP140-like protein OS=Homo sapiens GN=SP140L PE=2 SV=2

Match to Query 22492: 1078.575428 from(540.294990,2+) rtinseconds(3628) index(52788)

Title: Locus:1.1.1.2812.2

Data file 2011-11-10 - TFD - EP 3-2.mgf

Click mouse within plot area to zoom in by factor of two about that point

Or, Plot from  to  Da

Label all possible matches  Label matches used for scoring

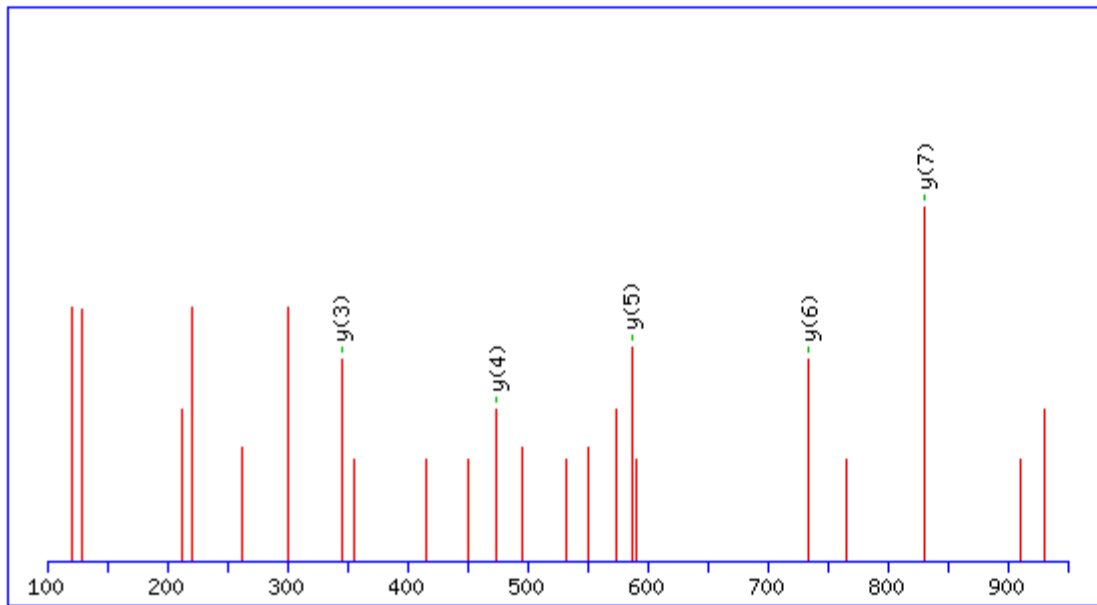

Monoisotopic mass of neutral peptide Mr(calc): 1078.581131

Fixed modifications: Propionamide (C) (apply to specified residues or termini only)

Ions Score: 35 Expect: 0.0013

Matches : 5/74 fragment ions using 8 most intense peaks ([help](#))

| # | b          | b <sup>++</sup> | b <sup>0</sup> | b <sup>0++</sup> | Seq. | y                 | y <sup>++</sup> | y <sup>*</sup> | y <sup>*++</sup> | y <sup>0</sup> | y <sup>0++</sup> | # |
|---|------------|-----------------|----------------|------------------|------|-------------------|-----------------|----------------|------------------|----------------|------------------|---|
| 1 | 102.054955 | 51.531116       | 84.044390      | 42.525833        | T    |                   |                 |                |                  |                |                  | 9 |
| 2 | 249.123369 | 125.065322      | 231.112804     | 116.060040       | F    | 978.540729        | 489.774003      | 961.514180     | 481.260728       | 960.530164     | 480.768720       | 8 |
| 3 | 346.176133 | 173.591704      | 328.165568     | 164.586422       | P    | <b>831.472315</b> | 416.239796      | 814.445766     | 407.726521       | 813.461750     | 407.234513       | 7 |
| 4 | 493.244547 | 247.125911      | 475.233982     | 238.120629       | F    | <b>734.419551</b> | 367.713414      | 717.393002     | 359.200139       | 716.408986     | 358.708131       | 6 |
| 5 | 606.328611 | 303.667944      | 588.318046     | 294.662661       | L    | <b>587.351137</b> | 294.179207      | 570.324588     | 285.665932       | 569.340572     | 285.173924       | 5 |
| 6 | 735.371204 | 368.189240      | 717.360639     | 359.183958       | E    | <b>474.267073</b> | 237.637174      | 457.240524     | 229.123900       | 456.256508     | 228.631892       | 4 |
| 7 | 792.392668 | 396.699972      | 774.382103     | 387.694690       | G    | <b>345.224480</b> | 173.115878      | 328.197931     | 164.602603       |                |                  | 3 |
| 8 | 905.476732 | 453.242004      | 887.466167     | 444.236722       | L    | 288.203016        | 144.605146      | 271.176467     | 136.091871       |                |                  | 2 |
| 9 |            |                 |                |                  | R    | 175.118952        | 88.063114       | 158.092403     | 79.549839        |                |                  | 1 |

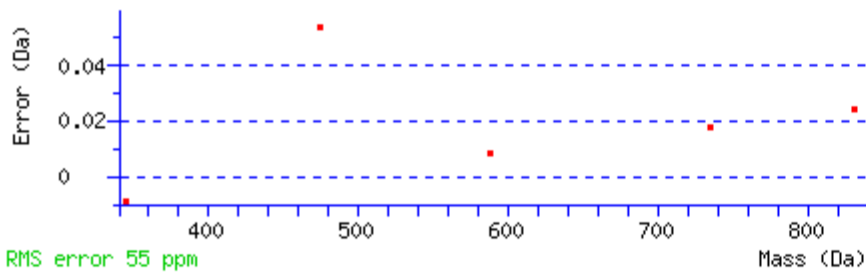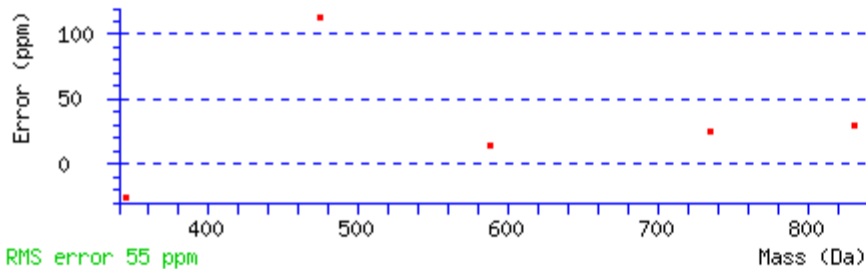

NCBI BLAST search of **TFPFLEGLR**

(Parameters: blastp, nr protein database, expect=20000, no filter, PAM30)

Other BLAST [web gateways](#)

All matches to this query

| Score | Mr(calc):   | Delta     | Sequence                  |
|-------|-------------|-----------|---------------------------|
| 34.6  | 1078.581131 | -0.005703 | <a href="#">TFPFLEGLR</a> |

# Mascot Search Results

## Peptide View

MS/MS Fragmentation of **SDSYVELSQYR**

Found in **NCBP2\_HUMAN**, Nuclear cap-binding protein subunit 2 OS=Homo sapiens GN=NCBP2 PE=1 SV=1

Match to Query 33273: 1345.619208 from(673.816880,2+) rtinseconds(2327) index(22830)

Title: Locus:1.1.1.2294.43

Data file 2011-11-10 - TFD - EP 3-7.mgf

Click mouse within plot area to zoom in by factor of two about that point

Or, Plot from  to  Da

Label all possible matches  Label matches used for scoring

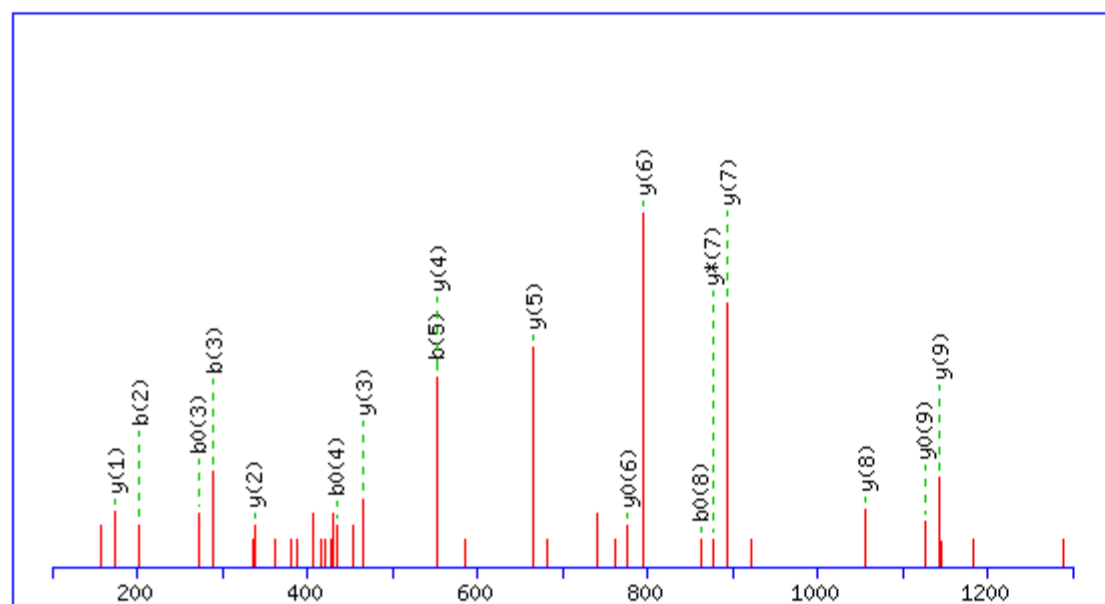

Monoisotopic mass of neutral peptide Mr(calc): 1345.614990

Fixed modifications: Propionamide (C) (apply to specified residues or termini only)

Ions Score: 73 Expect: 2.4e-007

Matches : 18/98 fragment ions using 27 most intense peaks [\(help\)](#)

| #  | b                 | b <sup>++</sup> | b <sup>*</sup> | b <sup>*++</sup> | b <sup>0</sup>    | b <sup>0++</sup> | Seq. | y                  | y <sup>++</sup> | y <sup>*</sup>    | y <sup>*++</sup> | y <sup>0</sup>     | y <sup>0++</sup> | #  |
|----|-------------------|-----------------|----------------|------------------|-------------------|------------------|------|--------------------|-----------------|-------------------|------------------|--------------------|------------------|----|
| 1  | 88.039304         | 44.523290       |                |                  | 70.028739         | 35.518008        | S    |                    |                 |                   |                  |                    |                  | 11 |
| 2  | <b>203.066247</b> | 102.036761      |                |                  | 185.055682        | 93.031479        | D    | 1259.590258        | 630.298767      | 1242.563709       | 621.785493       | 1241.579693        | 621.293484       | 10 |
| 3  | <b>290.098275</b> | 145.552776      |                |                  | <b>272.087710</b> | 136.547493       | S    | <b>1144.563315</b> | 572.785296      | 1127.536766       | 564.272021       | <b>1126.552750</b> | 563.780013       | 9  |
| 4  | 453.161604        | 227.084440      |                |                  | <b>435.151039</b> | 218.079158       | Y    | <b>1057.531287</b> | 529.269282      | 1040.504738       | 520.756007       | 1039.520722        | 520.263999       | 8  |
| 5  | <b>552.230018</b> | 276.618647      |                |                  | 534.219453        | 267.613365       | V    | <b>894.467958</b>  | 447.737617      | <b>877.441409</b> | 439.224342       | 876.457393         | 438.732334       | 7  |
| 6  | 681.272611        | 341.139944      |                |                  | 663.262046        | 332.134661       | E    | <b>795.399544</b>  | 398.203410      | 778.372995        | 389.690136       | <b>777.388979</b>  | 389.198128       | 6  |
| 7  | 794.356675        | 397.681976      |                |                  | 776.346110        | 388.676693       | L    | <b>666.356951</b>  | 333.682114      | 649.330402        | 325.168839       | 648.346386         | 324.676831       | 5  |
| 8  | 881.388703        | 441.197990      |                |                  | <b>863.378138</b> | 432.192707       | S    | <b>553.272887</b>  | 277.140082      | 536.246338        | 268.626807       | 535.262322         | 268.134799       | 4  |
| 9  | 1009.447281       | 505.227279      | 992.420732     | 496.714004       | 991.436716        | 496.221996       | Q    | <b>466.240859</b>  | 233.624067      | 449.214310        | 225.110793       |                    |                  | 3  |
| 10 | 1172.510610       | 586.758943      | 1155.484061    | 578.245669       | 1154.500045       | 577.753661       | Y    | <b>338.182281</b>  | 169.594778      | 321.155732        | 161.081504       |                    |                  | 2  |
| 11 |                   |                 |                |                  |                   |                  | R    | <b>175.118952</b>  | 88.063114       | 158.092403        | 79.549839        |                    |                  | 1  |

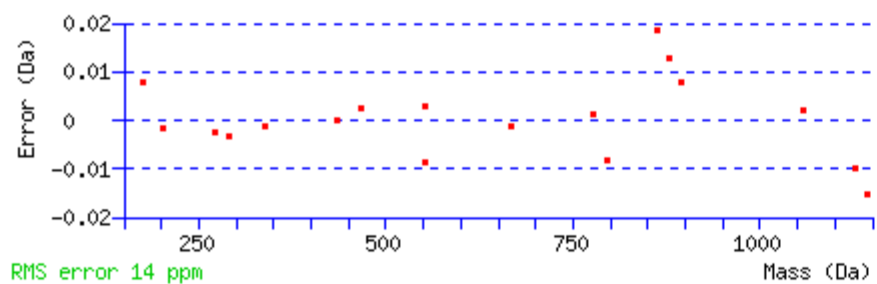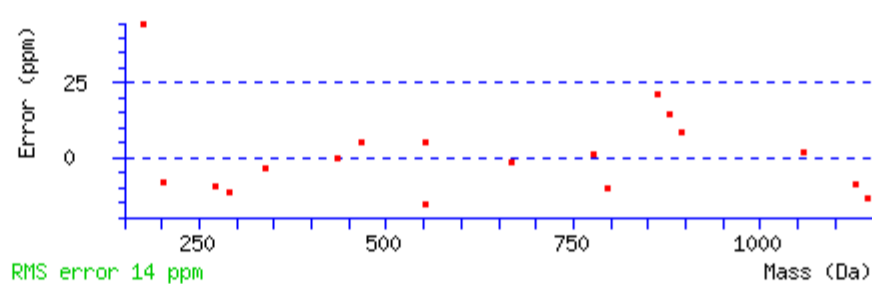

NCBI BLAST search of [SDSYVELSQYR](#)

(Parameters: blastp, nr protein database, expect=20000, no filter, PAM30)

Other BLAST [web gateways](#)

## All matches to this query

| Score | Mr(calc):   | Delta     | Sequence                      |
|-------|-------------|-----------|-------------------------------|
| 73.3  | 1345.614990 | 0.004218  | <a href="#">SDSYVELSQYR</a>   |
| 2.6   | 1345.629608 | -0.010400 | <a href="#">DSSPCVGLPAASR</a> |
| 2.6   | 1345.615860 | 0.003348  | <a href="#">IMGSYLCFGER</a>   |

# MASCOT Search Results

## Peptide View

MS/MS Fragmentation of **LVSSDPEINTK**  
 Found in **NUDC\_HUMAN**, Nuclear migration protein nudC OS=Homo sapiens GN=NUDC PE=1 SV=1

Match to Query 29716: 1201.619528 from(601.817040,2+) rtinseconds(1391) index(11481)  
 Title: Locus:1.1.1.1829.41  
 Data file 2011-11-12 - TFD - EP 6-4.mgf

Click mouse within plot area to zoom in by factor of two about that point  
 Or, Plot from  to  Da   
 Label all possible matches  Label matches used for scoring

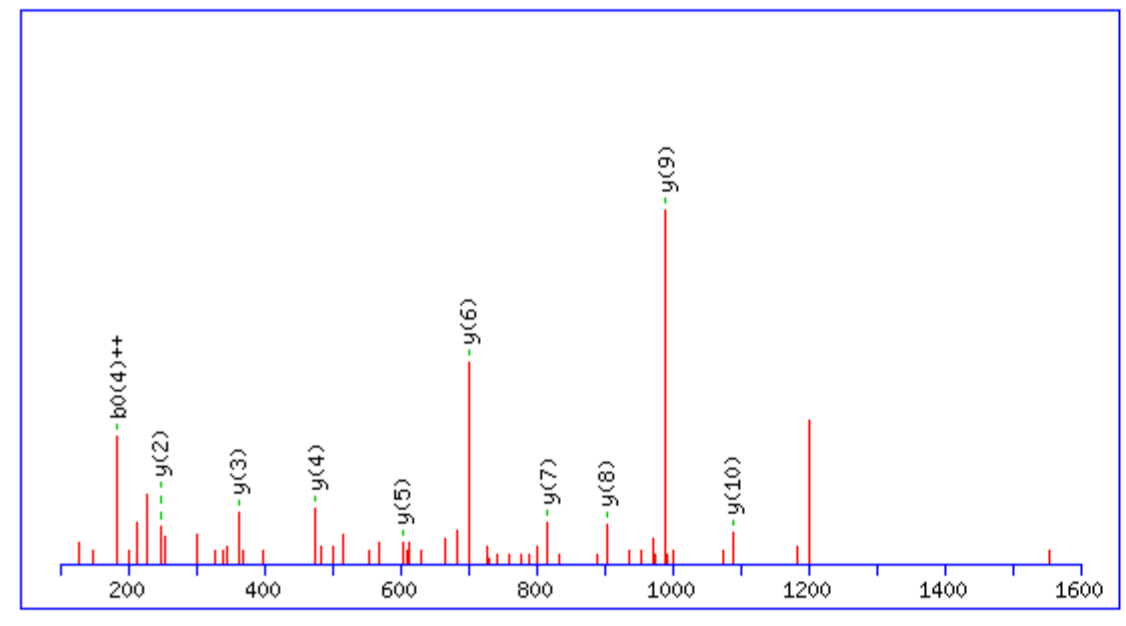

Monoisotopic mass of neutral peptide Mr(calc): 1201.619019  
 Fixed modifications: Propionamide (C) (apply to specified residues or termini only)  
 Ions Score: 99 Expect: 2.4e-009  
 Matches : 10/98 fragment ions using 11 most intense peaks ([help](#))

| #  | b           | b <sup>++</sup> | b <sup>*</sup> | b <sup>*++</sup> | b <sup>0</sup> | b <sup>0++</sup> | Seq. | y           | y <sup>++</sup> | y <sup>*</sup> | y <sup>*++</sup> | y <sup>0</sup> | y <sup>0++</sup> | #  |
|----|-------------|-----------------|----------------|------------------|----------------|------------------|------|-------------|-----------------|----------------|------------------|----------------|------------------|----|
| 1  | 114.091340  | 57.549308       |                |                  |                |                  | L    |             |                 |                |                  |                |                  | 11 |
| 2  | 213.159754  | 107.083515      |                |                  |                |                  | V    | 1089.542244 | 545.274760      | 1072.515695    | 536.761486       | 1071.531679    | 536.269478       | 10 |
| 3  | 300.191782  | 150.599529      |                |                  | 282.181217     | 141.594247       | S    | 990.473830  | 495.740553      | 973.447281     | 487.227279       | 972.463265     | 486.735271       | 9  |
| 4  | 387.223810  | 194.115543      |                |                  | 369.213245     | 185.110261       | S    | 903.441802  | 452.224539      | 886.415253     | 443.711265       | 885.431237     | 443.219257       | 8  |
| 5  | 502.250753  | 251.629015      |                |                  | 484.240188     | 242.623732       | D    | 816.409774  | 408.708525      | 799.383225     | 400.195251       | 798.399209     | 399.703243       | 7  |
| 6  | 599.303517  | 300.155397      |                |                  | 581.292952     | 291.150114       | P    | 701.382831  | 351.195054      | 684.356282     | 342.681779       | 683.372266     | 342.189771       | 6  |
| 7  | 728.346110  | 364.676693      |                |                  | 710.335545     | 355.671411       | E    | 604.330067  | 302.668672      | 587.303518     | 294.155397       | 586.319502     | 293.663389       | 5  |
| 8  | 841.430174  | 421.218725      |                |                  | 823.419609     | 412.213443       | I    | 475.287474  | 238.147375      | 458.260925     | 229.634100       | 457.276909     | 229.142092       | 4  |
| 9  | 955.473101  | 478.240189      | 938.446552     | 469.726914       | 937.462536     | 469.234906       | N    | 362.203410  | 181.605343      | 345.176861     | 173.092068       | 344.192845     | 172.600060       | 3  |
| 10 | 1056.520780 | 528.764028      | 1039.494231    | 520.250754       | 1038.510215    | 519.758746       | T    | 248.160483  | 124.583879      | 231.133934     | 116.070605       | 230.149918     | 115.578597       | 2  |
| 11 |             |                 |                |                  |                |                  | K    | 147.112804  | 74.060040       | 130.086255     | 65.546765        |                |                  | 1  |

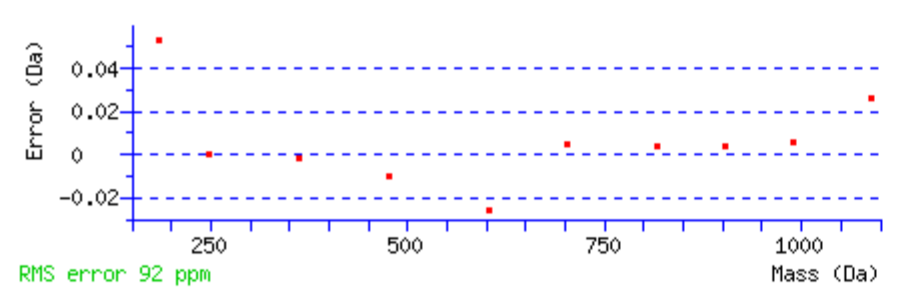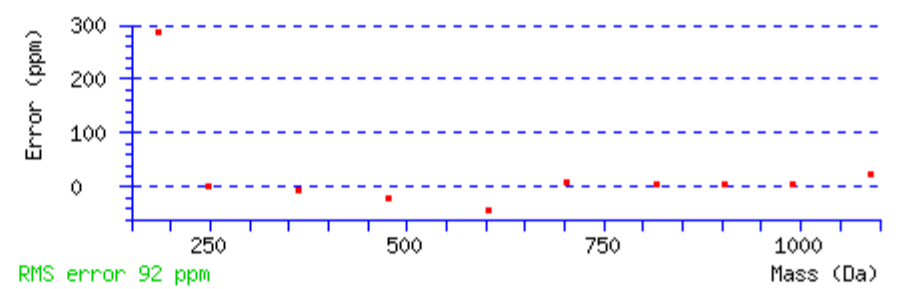

NCBI BLAST search of [LVSSDPEINTK](#)  
 (Parameters: blastp, nr protein database, expect=20000, no filter, PAM30)  
 Other BLAST [web gateways](#)

### All matches to this query

| Score | Mr(calc):   | Delta     | Sequence                    |
|-------|-------------|-----------|-----------------------------|
| 98.6  | 1201.619019 | 0.000509  | <a href="#">LVSSDPEINTK</a> |
| 9.1   | 1201.612503 | 0.007025  | <a href="#">LSVSNMVHTAK</a> |
| 8.4   | 1201.619003 | 0.000525  | <a href="#">LPSAETLSQK</a>  |
| 3.8   | 1201.630249 | -0.010721 | <a href="#">LADIEQSTGIR</a> |



**Peptide View**

MS/MS Fragmentation of **EYEIPSNLTPADVFFR**

Found in **NUI33\_HUMAN**, Nuclear pore complex protein Nup133 OS=Homo sapiens GN=NUP133 PE=1 SV=2

Match to Query 60359: 1896.930388 from(949.472470,2+) rtinseconds(3913) index(58486)

Title: Locus:1.1.1.2789.47

Data file 2011-11-12 - TFD - EP 6-1.mgf

Click mouse within plot area to zoom in by factor of two about that point

Or, Plot from  to  Da

Label all possible matches  Label matches used for scoring

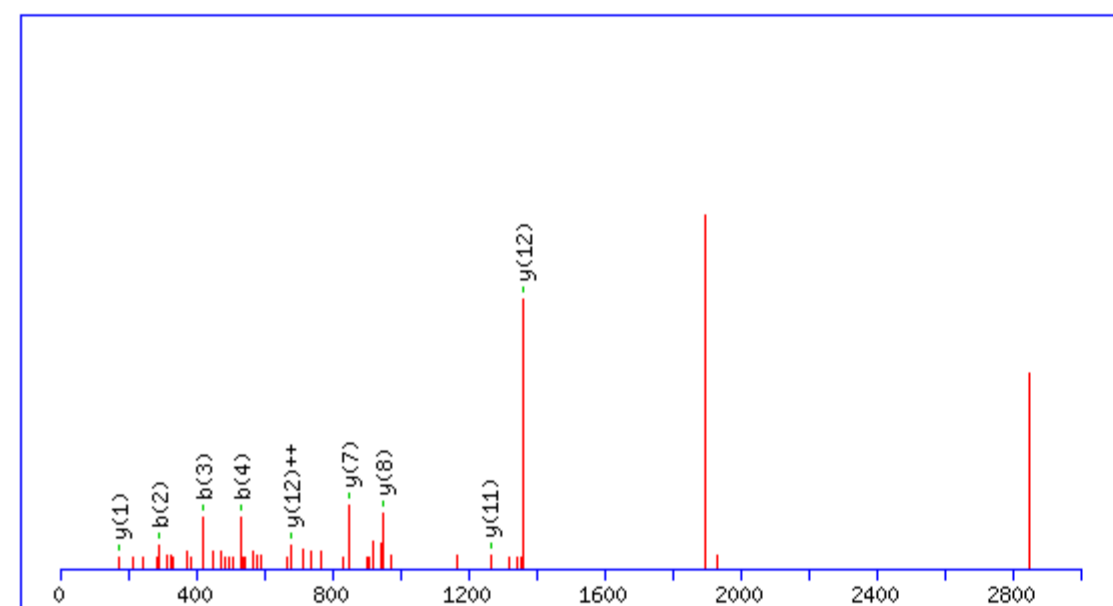

Monoisotopic mass of neutral peptide Mr(calc): 1896.925766

Fixed modifications: Propionamide (C) (apply to specified residues or termini only)

Ions Score: 35 Expect: 0.0032

Matches : 9/160 fragment ions using 11 most intense peaks ([help](#))

| #  | b                 | b <sup>++</sup> | b <sup>*</sup> | b <sup>*++</sup> | b <sup>0</sup> | b <sup>0++</sup> | Seq. | y                  | y <sup>++</sup>   | y <sup>*</sup> | y <sup>*++</sup> | y <sup>0</sup> | y <sup>0++</sup> | #  |
|----|-------------------|-----------------|----------------|------------------|----------------|------------------|------|--------------------|-------------------|----------------|------------------|----------------|------------------|----|
| 1  | 130.049869        | 65.528572       |                |                  | 112.039304     | 56.523290        | E    |                    |                   |                |                  |                |                  | 16 |
| 2  | <b>293.113198</b> | 147.060237      |                |                  | 275.102633     | 138.054955       | Y    | 1768.890463        | 884.948870        | 1751.863914    | 876.435595       | 1750.879898    | 875.943587       | 15 |
| 3  | <b>422.155791</b> | 211.581534      |                |                  | 404.145226     | 202.576251       | E    | 1605.827134        | 803.417205        | 1588.800585    | 794.903931       | 1587.816569    | 794.411923       | 14 |
| 4  | <b>535.239855</b> | 268.123566      |                |                  | 517.229290     | 259.118283       | I    | 1476.784541        | 738.895909        | 1459.757992    | 730.382634       | 1458.773976    | 729.890626       | 13 |
| 5  | 632.292619        | 316.649948      |                |                  | 614.282054     | 307.644665       | P    | <b>1363.700477</b> | <b>682.353877</b> | 1346.673928    | 673.840602       | 1345.689912    | 673.348594       | 12 |
| 6  | 719.324647        | 360.165962      |                |                  | 701.314082     | 351.160679       | S    | <b>1266.647713</b> | 633.827495        | 1249.621164    | 625.314220       | 1248.637148    | 624.822212       | 11 |
| 7  | 833.367574        | 417.187425      | 816.341025     | 408.674151       | 815.357009     | 408.182143       | N    | 1179.615685        | 590.311481        | 1162.589136    | 581.798206       | 1161.605120    | 581.306198       | 10 |
| 8  | 946.451638        | 473.729457      | 929.425089     | 465.216183       | 928.441073     | 464.724175       | L    | 1065.572758        | 533.290017        | 1048.546209    | 524.776743       | 1047.562193    | 524.284735       | 9  |
| 9  | 1047.499317       | 524.253297      | 1030.472768    | 515.740022       | 1029.488752    | 515.248014       | T    | <b>952.488694</b>  | 476.747985        | 935.462145     | 468.234711       | 934.478129     | 467.742703       | 8  |
| 10 | 1144.552081       | 572.779679      | 1127.525532    | 564.266404       | 1126.541516    | 563.774396       | P    | <b>851.441015</b>  | 426.224146        | 834.414466     | 417.710871       | 833.430450     | 417.218863       | 7  |
| 11 | 1215.589195       | 608.298236      | 1198.562646    | 599.784961       | 1197.578630    | 599.292953       | A    | 754.388251         | 377.697764        | 737.361702     | 369.184489       | 736.377686     | 368.692481       | 6  |
| 12 | 1330.616138       | 665.811707      | 1313.589589    | 657.298433       | 1312.605573    | 656.806425       | D    | 683.351137         | 342.179207        | 666.324588     | 333.665932       | 665.340572     | 333.173924       | 5  |
| 13 | 1429.684552       | 715.345914      | 1412.658003    | 706.832640       | 1411.673987    | 706.340632       | V    | 568.324194         | 284.665735        | 551.297645     | 276.152461       |                |                  | 4  |
| 14 | 1576.752966       | 788.880121      | 1559.726417    | 780.366847       | 1558.742401    | 779.874839       | F    | 469.255780         | 235.131528        | 452.229231     | 226.618254       |                |                  | 3  |
| 15 | 1723.821380       | 862.414328      | 1706.794831    | 853.901054       | 1705.810815    | 853.409046       | F    | 322.187366         | 161.597321        | 305.160817     | 153.084047       |                |                  | 2  |
| 16 |                   |                 |                |                  |                |                  | R    | <b>175.118952</b>  | 88.063114         | 158.092403     | 79.549839        |                |                  | 1  |

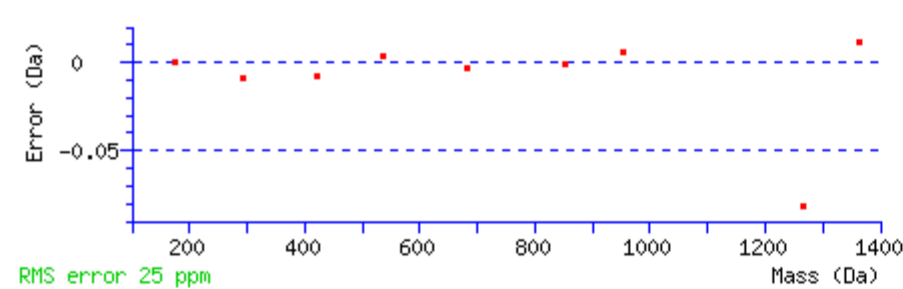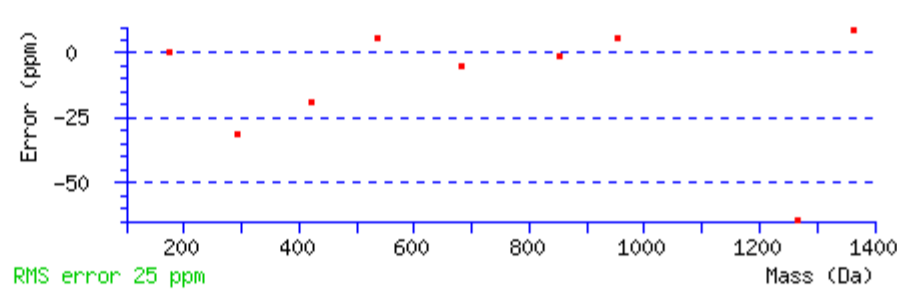

NCBI BLAST search of **EYEIPSNLTPADVFFR**

(Parameters: blastp, nr protein database, expect=20000, no filter, PAM30)

Other BLAST [web gateways](#)

**All matches to this query**

| Score | Mr(calc):   | Delta     | Sequence                             |
|-------|-------------|-----------|--------------------------------------|
| 35.0  | 1896.925766 | 0.004622  | <a href="#">EYEIPSNLTPADVFFR</a>     |
| 7.8   | 1896.933014 | -0.002626 | <a href="#">GPPGPPGPPGEGQLPGLGR</a>  |
| 6.4   | 1896.933014 | -0.002626 | <a href="#">GPPGPPGPPGEGQLPGLGR</a>  |
| 6.4   | 1896.933014 | -0.002626 | <a href="#">GPPGPPGPPGEGQLPGLGR</a>  |
| 6.3   | 1896.947571 | -0.017183 | <a href="#">NVKEIEHVMNLGNQTR</a>     |
| 4.3   | 1896.926010 | 0.004378  | <a href="#">LPMLHDPPKMGMPVVR</a>     |
| 3.1   | 1896.933868 | -0.003480 | <a href="#">SCCVFTFQPNGKLVGR</a>     |
| 1.3   | 1896.926010 | 0.004378  | <a href="#">LPMLHDPPKMGMPVVR</a>     |
| 1.3   | 1896.940201 | -0.009813 | <a href="#">RSSGSIVSGSLGHGPGDAAR</a> |
| 0.7   | 1896.933838 | -0.003450 | <a href="#">MSLWVDKYRPCSLGR</a>      |

# Mascot Search Results

## Peptide View

MS/MS Fragmentation of **LVPLNQESVEER**

Found in **NUP93\_HUMAN**, Nuclear pore complex protein Nup93 OS=Homo sapiens GN=NUP93 PE=1 SV=2

Match to Query 40375: 1411.731308 from(706.872930,2+) rtinseconds(1956) index(18295)

Title: Locus:1.1.1.2388.47

Data file 2011-11-12 - TFD - EP 5-2.mgf

Click mouse within plot area to zoom in by factor of two about that point

Or, Plot from  to  Da

Label all possible matches  Label matches used for scoring

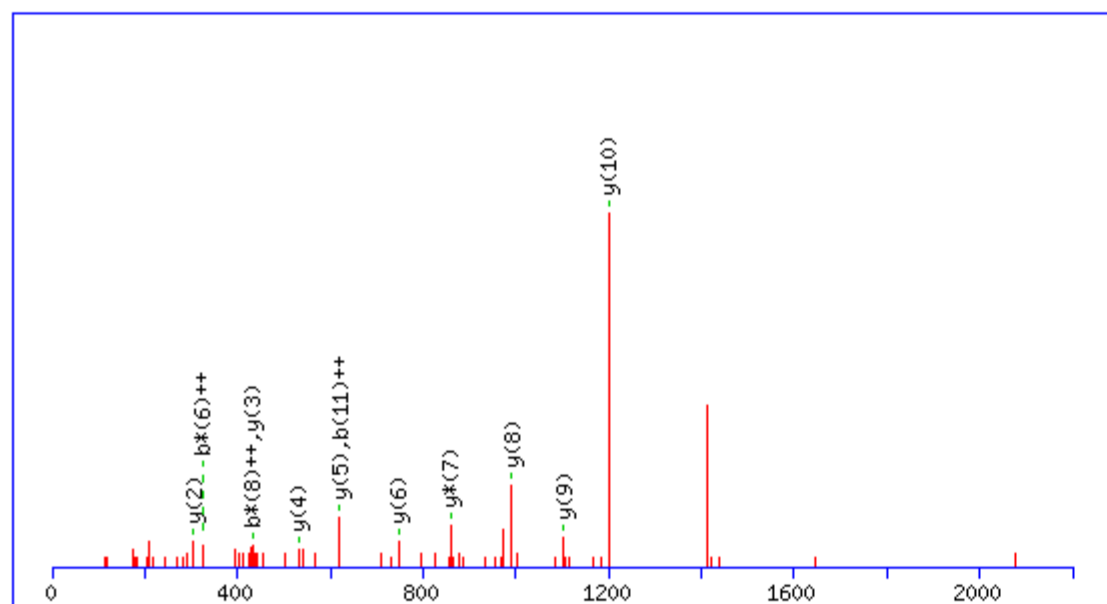

Monoisotopic mass of neutral peptide Mr(calc): 1411.730682

Fixed modifications: Propionamide (C) (apply to specified residues or termini only)

Ions Score: 74 Expect: 3.9e-007

Matches : 12/110 fragment ions using 11 most intense peaks ([help](#))

| #  | b           | b <sup>++</sup>   | b <sup>*</sup> | b <sup>*++</sup>  | b <sup>0</sup> | b <sup>0++</sup> | Seq. | y                  | y <sup>++</sup> | y <sup>*</sup>    | y <sup>*++</sup> | y <sup>0</sup> | y <sup>0++</sup> | #  |
|----|-------------|-------------------|----------------|-------------------|----------------|------------------|------|--------------------|-----------------|-------------------|------------------|----------------|------------------|----|
| 1  | 114.091340  | 57.549308         |                |                   |                |                  | L    |                    |                 |                   |                  |                |                  | 12 |
| 2  | 213.159754  | 107.083515        |                |                   |                |                  | V    | 1299.653920        | 650.330598      | 1282.627371       | 641.817324       | 1281.643355    | 641.325316       | 11 |
| 3  | 310.212518  | 155.609897        |                |                   |                |                  | P    | <b>1200.585506</b> | 600.796391      | 1183.558957       | 592.283117       | 1182.574941    | 591.791109       | 10 |
| 4  | 423.296582  | 212.151929        |                |                   |                |                  | L    | <b>1103.532742</b> | 552.270009      | 1086.506193       | 543.756735       | 1085.522177    | 543.264727       | 9  |
| 5  | 537.339509  | 269.173393        | 520.312960     | 260.660118        |                |                  | N    | <b>990.448678</b>  | 495.727977      | 973.422129        | 487.214703       | 972.438113     | 486.722695       | 8  |
| 6  | 665.398087  | 333.202682        | 648.371538     | <b>324.689407</b> |                |                  | Q    | 876.405751         | 438.706514      | <b>859.379202</b> | 430.193239       | 858.395186     | 429.701231       | 7  |
| 7  | 794.440680  | 397.723978        | 777.414131     | 389.210704        | 776.430115     | 388.718696       | E    | <b>748.347173</b>  | 374.677225      | 731.320624        | 366.163950       | 730.336608     | 365.671942       | 6  |
| 8  | 881.472708  | 441.239992        | 864.446159     | <b>432.726718</b> | 863.462143     | 432.234710       | S    | <b>619.304580</b>  | 310.155928      | 602.278031        | 301.642654       | 601.294015     | 301.150646       | 5  |
| 9  | 980.541122  | 490.774199        | 963.514573     | 482.260924        | 962.530557     | 481.768916       | V    | <b>532.272552</b>  | 266.639914      | 515.246003        | 258.126640       | 514.261987     | 257.634632       | 4  |
| 10 | 1109.583715 | 555.295496        | 1092.557166    | 546.782221        | 1091.573150    | 546.290213       | E    | <b>433.204138</b>  | 217.105707      | 416.177589        | 208.592433       | 415.193573     | 208.100425       | 3  |
| 11 | 1238.626308 | <b>619.816792</b> | 1221.599759    | 611.303518        | 1220.615743    | 610.811510       | E    | <b>304.161545</b>  | 152.584411      | 287.134996        | 144.071136       | 286.150980     | 143.579128       | 2  |
| 12 |             |                   |                |                   |                |                  | R    | 175.118952         | 88.063114       | 158.092403        | 79.549839        |                |                  | 1  |

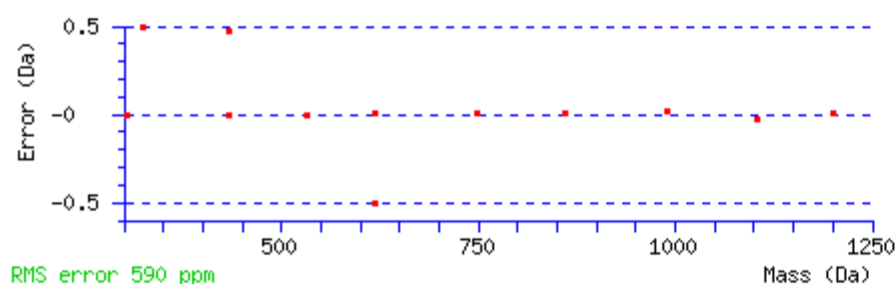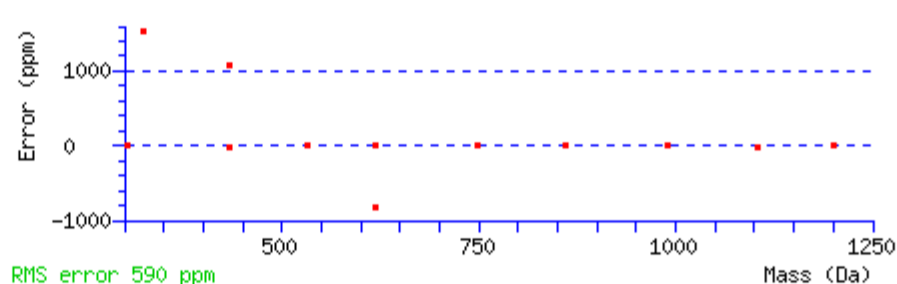

NCBI BLAST search of **LVPLNQESVEER**

(Parameters: blastp, nr protein database, expect=20000, no filter, PAM30)

Other BLAST [web gateways](#)

All matches to this query

| Score | Mr(calc):   | Delta    | Sequence                     |
|-------|-------------|----------|------------------------------|
| 74.3  | 1411.730682 | 0.000626 | <a href="#">LVPLNQESVEER</a> |
| 15.7  | 1411.730682 | 0.000626 | <a href="#">VPALLENQVEER</a> |

**MATRIX SCIENCE Mascot Search Results**

**Peptide View**

MS/MS Fragmentation of **ELEDLLSPLEELVK**

Found in **NUP62\_HUMAN**, Nuclear pore glycoprotein p62 OS=Homo sapiens GN=NUP62 PE=1 SV=3

Match to Query 46218: 1625.888828 from(813.951690,2+) rtinseconds(4516) index(69856)

Title: Locus:1.1.1.3230.23

Data file 2011-11-12 - TFD - EP 5-3.mgf

Click mouse within plot area to zoom in by factor of two about that point

Or, Plot from  to  Da

Label all possible matches  Label matches used for scoring

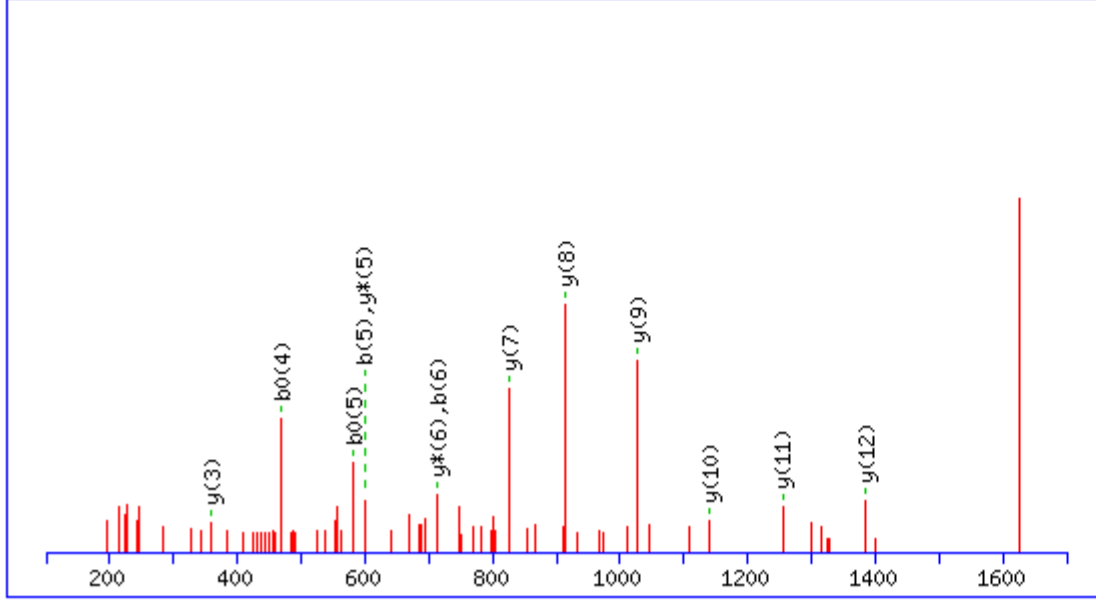

Monoisotopic mass of neutral peptide Mr(calc): 1625.876328

Fixed modifications: Propionamide (C) (apply to specified residues or termini only)

Ions Score: 59 Expect: 1.1e-005

Matches : 13/124 fragment ions using 13 most intense peaks ([help](#))

| #  | b                 | b <sup>++</sup> | b <sup>0</sup>    | b <sup>0++</sup> | Seq. | y                  | y <sup>++</sup> | y*                | y <sup>+++</sup> | y <sup>0</sup> | y <sup>0++</sup> | #  |
|----|-------------------|-----------------|-------------------|------------------|------|--------------------|-----------------|-------------------|------------------|----------------|------------------|----|
| 1  | 130.049869        | 65.528572       | 112.039304        | 56.523290        | E    |                    |                 |                   |                  |                |                  | 14 |
| 2  | 243.133933        | 122.070605      | 225.123368        | 113.065322       | L    | 1497.841052        | 749.424164      | 1480.814503       | 740.910890       | 1479.830487    | 740.418882       | 13 |
| 3  | 372.176526        | 186.591901      | 354.165961        | 177.586619       | E    | <b>1384.756988</b> | 692.882132      | 1367.730439       | 684.368858       | 1366.746423    | 683.876850       | 12 |
| 4  | 487.203469        | 244.105373      | <b>469.192904</b> | 235.100090       | D    | <b>1255.714395</b> | 628.360836      | 1238.687846       | 619.847561       | 1237.703830    | 619.355553       | 11 |
| 5  | <b>600.287533</b> | 300.647405      | <b>582.276968</b> | 291.642122       | L    | <b>1140.687452</b> | 570.847364      | 1123.660903       | 562.334090       | 1122.676887    | 561.842082       | 10 |
| 6  | <b>713.371597</b> | 357.189437      | 695.361032        | 348.184154       | L    | <b>1027.603388</b> | 514.305332      | 1010.576839       | 505.792058       | 1009.592823    | 505.300050       | 9  |
| 7  | 800.403625        | 400.705451      | 782.393060        | 391.700168       | S    | <b>914.519324</b>  | 457.763300      | 897.492775        | 449.250026       | 896.508759     | 448.758018       | 8  |
| 8  | 897.456389        | 449.231833      | 879.445824        | 440.226550       | P    | <b>827.487296</b>  | 414.247286      | 810.460747        | 405.734012       | 809.476731     | 405.242004       | 7  |
| 9  | 1010.540453       | 505.773865      | 992.529888        | 496.768582       | L    | 730.434532         | 365.720904      | <b>713.407983</b> | 357.207630       | 712.423967     | 356.715622       | 6  |
| 10 | 1139.583046       | 570.295161      | 1121.572481       | 561.289878       | E    | 617.350468         | 309.178872      | <b>600.323919</b> | 300.665598       | 599.339903     | 300.173590       | 5  |
| 11 | 1268.625639       | 634.816458      | 1250.615074       | 625.811175       | E    | 488.307875         | 244.657576      | 471.281326        | 236.144301       | 470.297310     | 235.652293       | 4  |
| 12 | 1381.709703       | 691.358490      | 1363.699138       | 682.353207       | L    | <b>359.265282</b>  | 180.136279      | 342.238733        | 171.623004       |                |                  | 3  |
| 13 | 1480.778117       | 740.892697      | 1462.767552       | 731.887414       | V    | 246.181218         | 123.594247      | 229.154669        | 115.080973       |                |                  | 2  |
| 14 |                   |                 |                   |                  | K    | 147.112804         | 74.060040       | 130.086255        | 65.546765        |                |                  | 1  |

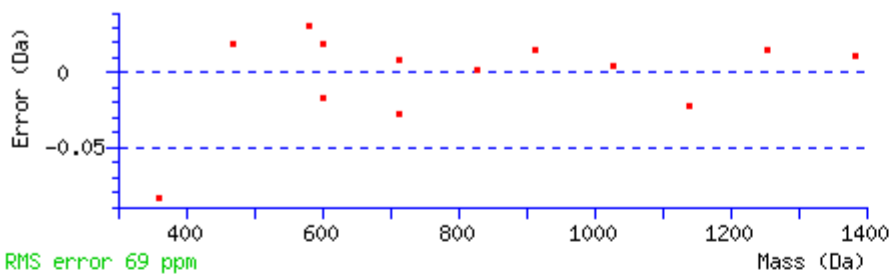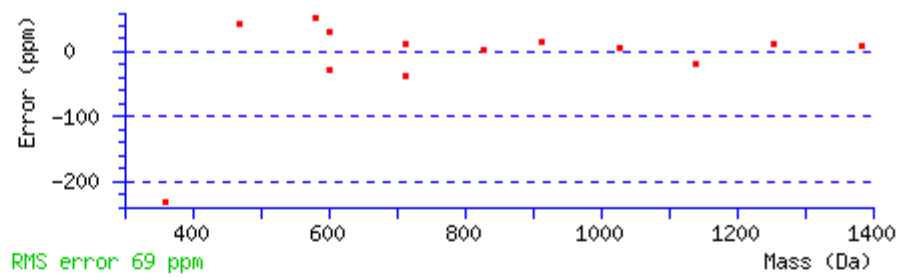

NCBI BLAST search of **ELEDLLSPLEELVK**

(Parameters: blastp, nr protein database, expect=20000, no filter, PAM30)

Other BLAST [web gateways](#)

**All matches to this query**

| Score | Mr(calc):   | Delta     | Sequence                       |
|-------|-------------|-----------|--------------------------------|
| 58.8  | 1625.876328 | 0.012500  | <a href="#">ELEDLLSPLEELVK</a> |
| 9.7   | 1625.877701 | 0.011127  | <a href="#">QETPKLWPVQLQK</a>  |
| 4.4   | 1625.877686 | 0.011142  | <a href="#">GYHLLASATLQPK</a>  |
| 2.0   | 1625.900162 | -0.011334 | <a href="#">LLARQAGWQDVLTR</a> |

**MASCOT** **SCIENCE** Mascot Search Results

**Peptide View**

MS/MS Fragmentation of **LPTPKLR**

Found in **MDM1\_HUMAN**, Nuclear protein MDM1 OS=Homo sapiens GN=MDM1 PE=1 SV=2

Match to Query 3632: 855.509668 from(428.762110,2+) rtinseconds(1733) index(14581)

Title: Locus:1.1.1.2221.8

Data file 2011-11-12 - TFD - EP 5-1.mgf

Click mouse within plot area to zoom in by factor of two about that point

Or, Plot from  to  Da

Label all possible matches  Label matches used for scoring

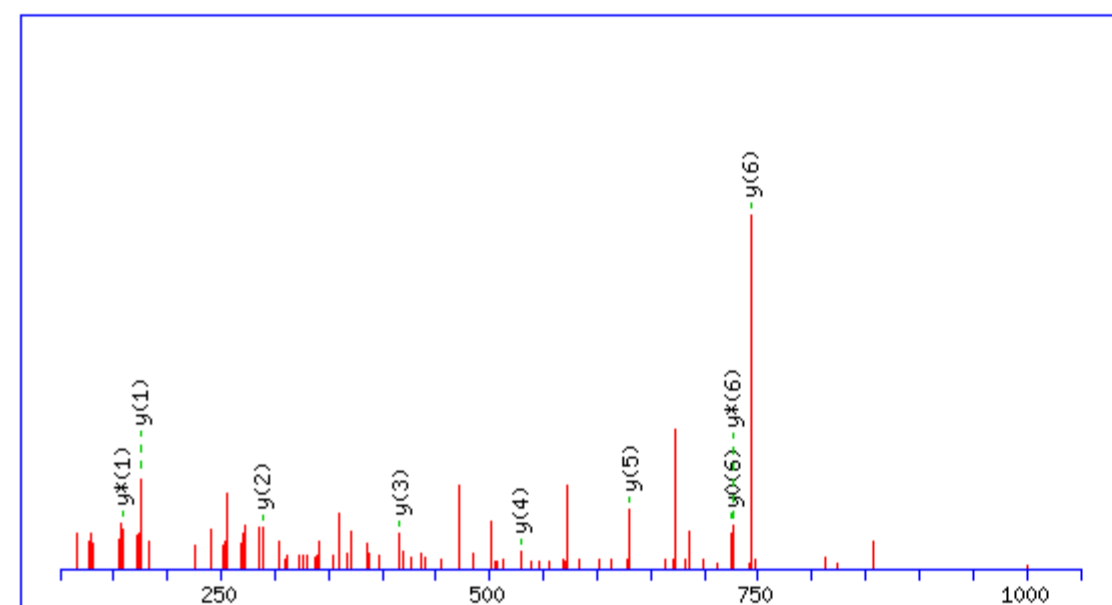

Monoisotopic mass of neutral peptide Mr(calc): 855.517792

Fixed modifications: Propionamide (C) (apply to specified residues or termini only)

Variable modifications:

P2 : Oxidation (P)

P4 : Oxidation (P)

Ions Score: 34 Expect: 0.004

Matches : 9/52 fragment ions using 22 most intense peaks ([help](#))

| # | b          | b <sup>++</sup> | b*         | b <sup>+++</sup> | b <sup>0</sup> | b <sup>0++</sup> | Seq. | y          | y <sup>++</sup> | y*         | y <sup>+++</sup> | y <sup>0</sup> | y <sup>0++</sup> | # |
|---|------------|-----------------|------------|------------------|----------------|------------------|------|------------|-----------------|------------|------------------|----------------|------------------|---|
| 1 | 114.091340 | 57.549308       |            |                  |                |                  | L    |            |                 |            |                  |                |                  | 7 |
| 2 | 227.139019 | 114.073147      |            |                  |                |                  | P    | 743.441016 | 372.224146      | 726.414467 | 363.710872       | 725.430451     | 363.218864       | 6 |
| 3 | 328.186698 | 164.596987      |            |                  | 310.176133     | 155.591704       | T    | 630.393337 | 315.700307      | 613.366788 | 307.187032       | 612.382772     | 306.695024       | 5 |
| 4 | 441.234377 | 221.120826      |            |                  | 423.223812     | 212.115544       | P    | 529.345658 | 265.176467      | 512.319109 | 256.663193       |                |                  | 4 |
| 5 | 569.329340 | 285.168308      | 552.302791 | 276.655034       | 551.318775     | 276.163026       | K    | 416.297979 | 208.652628      | 399.271430 | 200.139353       |                |                  | 3 |
| 6 | 682.413404 | 341.710340      | 665.386855 | 333.197066       | 664.402839     | 332.705058       | L    | 288.203016 | 144.605146      | 271.176467 | 136.091872       |                |                  | 2 |
| 7 |            |                 |            |                  |                |                  | R    | 175.118952 | 88.063114       | 158.092403 | 79.549840        |                |                  | 1 |

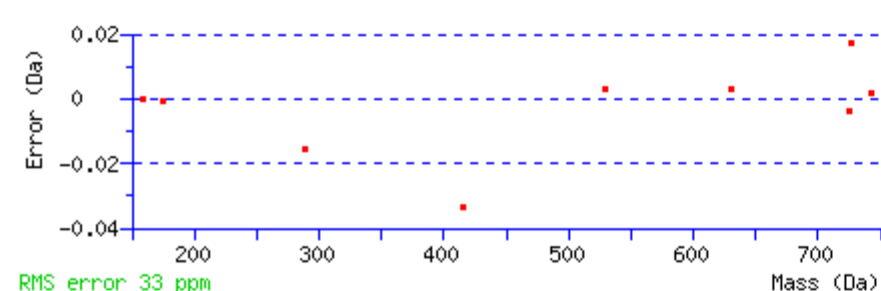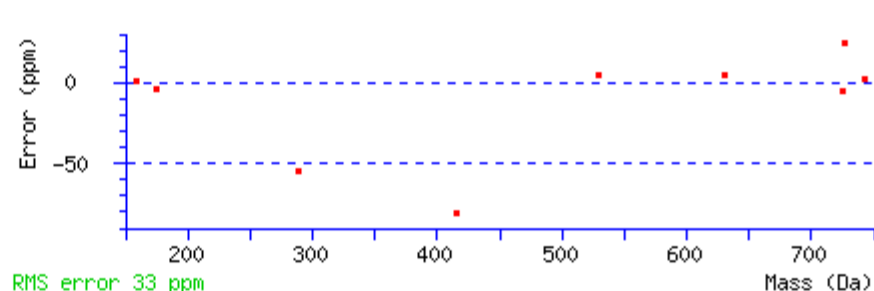

NCBI BLAST search of **LPTPKLR**

(Parameters: blastp, nr protein database, expect=20000, no filter, PAM30)

Other BLAST [web gateways](#)

**All matches to this query**

| Score | Mr(calc):  | Delta     | Sequence                 |
|-------|------------|-----------|--------------------------|
| 33.6  | 855.517792 | -0.008124 | <a href="#">LPTPKLR</a>  |
| 21.9  | 855.517792 | -0.008124 | <a href="#">LPTLPKR</a>  |
| 20.8  | 855.517776 | -0.008108 | <a href="#">SPLSLIAR</a> |
| 19.3  | 855.517792 | -0.008124 | <a href="#">LLSTLGPR</a> |
| 12.5  | 855.517792 | -0.008124 | <a href="#">LLGDLGLR</a> |
| 12.4  | 855.517792 | -0.008124 | <a href="#">LEVVAGLR</a> |
| 12.4  | 855.517792 | -0.008124 | <a href="#">LVLDQLR</a>  |
| 11.3  | 855.503860 | 0.005808  | <a href="#">LAGAVRNR</a> |
| 9.3   | 855.517792 | -0.008124 | <a href="#">ALLSTPVR</a> |
| 8.9   | 855.517761 | -0.008093 | <a href="#">EAALIALR</a> |

# Mascot Search Results

## Peptide View

MS/MS Fragmentation of **LNVAFLNELPK**

Found in **NXF1\_HUMAN**, Nuclear RNA export factor 1 OS=Homo sapiens GN=NXF1 PE=1 SV=1

Match to Query 40715: 1355.783708 from(678.899130,2+) rtinseconds(4293) index(63905)

Title: Locus:1.1.1.3044.17

Data file 2011-11-14 - TFD - EP 8-2.mgf

Click mouse within plot area to zoom in by factor of two about that point

Or, Plot from  to  Da

Label all possible matches  Label matches used for scoring

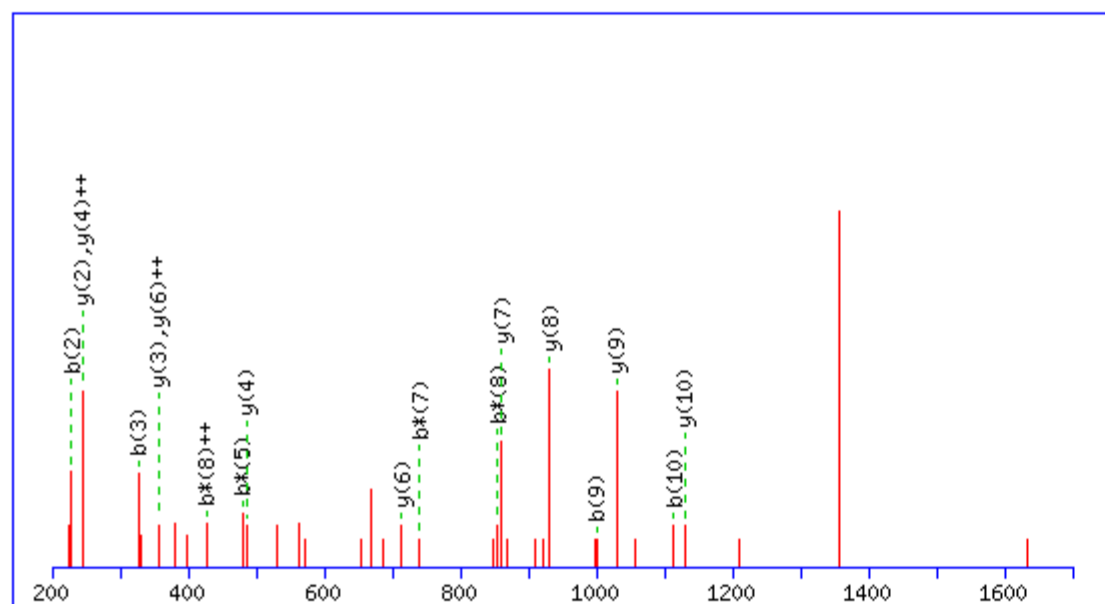

Monoisotopic mass of neutral peptide Mr(calc): 1355.781265

Fixed modifications: Propionamide (C) (apply to specified residues or termini only)

Ions Score: 52 Expect: 2.9e-005

Matches : 18/108 fragment ions using 30 most intense peaks ([help](#))

| #  | b                  | b <sup>++</sup> | b <sup>*</sup>    | b <sup>*++</sup>  | b <sup>0</sup> | b <sup>0++</sup> | Seq. | y                  | y <sup>++</sup>   | y <sup>*</sup> | y <sup>*++</sup> | y <sup>0</sup> | y <sup>0++</sup> | #  |
|----|--------------------|-----------------|-------------------|-------------------|----------------|------------------|------|--------------------|-------------------|----------------|------------------|----------------|------------------|----|
| 1  | 114.091340         | 57.549308       |                   |                   |                |                  | L    |                    |                   |                |                  |                |                  | 12 |
| 2  | <b>228.134267</b>  | 114.570771      | 211.107718        | 106.057497        |                |                  | N    | 1243.704499        | 622.355888        | 1226.677950    | 613.842613       | 1225.693934    | 613.350605       | 11 |
| 3  | <b>327.202681</b>  | 164.104978      | 310.176132        | 155.591704        |                |                  | V    | <b>1129.661572</b> | 565.334424        | 1112.635023    | 556.821150       | 1111.651007    | 556.329141       | 10 |
| 4  | 426.271095         | 213.639186      | 409.244546        | 205.125911        |                |                  | V    | <b>1030.593158</b> | 515.800217        | 1013.566609    | 507.286943       | 1012.582593    | 506.794935       | 9  |
| 5  | 497.308209         | 249.157742      | <b>480.281660</b> | 240.644468        |                |                  | A    | <b>931.524744</b>  | 466.266010        | 914.498195     | 457.752736       | 913.514179     | 457.260728       | 8  |
| 6  | 644.376623         | 322.691950      | 627.350074        | 314.178675        |                |                  | F    | <b>860.487630</b>  | 430.747453        | 843.461081     | 422.234179       | 842.477065     | 421.742171       | 7  |
| 7  | 757.460687         | 379.233982      | <b>740.434138</b> | 370.720707        |                |                  | L    | <b>713.419216</b>  | <b>357.213246</b> | 696.392667     | 348.699972       | 695.408651     | 348.207964       | 6  |
| 8  | 871.503614         | 436.255445      | <b>854.477065</b> | <b>427.742170</b> |                |                  | N    | 600.335152         | 300.671214        | 583.308603     | 292.157940       | 582.324587     | 291.665932       | 5  |
| 9  | <b>1000.546207</b> | 500.776742      | 983.519658        | 492.263467        | 982.535642     | 491.771459       | E    | <b>486.292225</b>  | <b>243.649751</b> | 469.265676     | 235.136476       | 468.281660     | 234.644468       | 4  |
| 10 | <b>1113.630271</b> | 557.318774      | 1096.603722       | 548.805499        | 1095.619706    | 548.313491       | L    | <b>357.249632</b>  | 179.128454        | 340.223083     | 170.615180       |                |                  | 3  |
| 11 | 1210.683035        | 605.845156      | 1193.656486       | 597.331881        | 1192.672470    | 596.839873       | P    | <b>244.165568</b>  | 122.586422        | 227.139019     | 114.073148       |                |                  | 2  |
| 12 |                    |                 |                   |                   |                |                  | K    | 147.112804         | 74.060040         | 130.086255     | 65.546765        |                |                  | 1  |

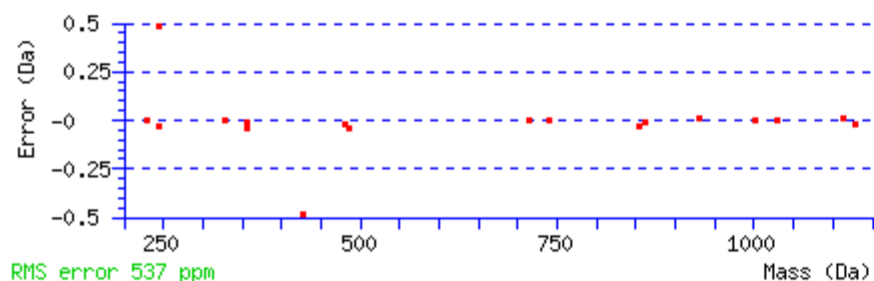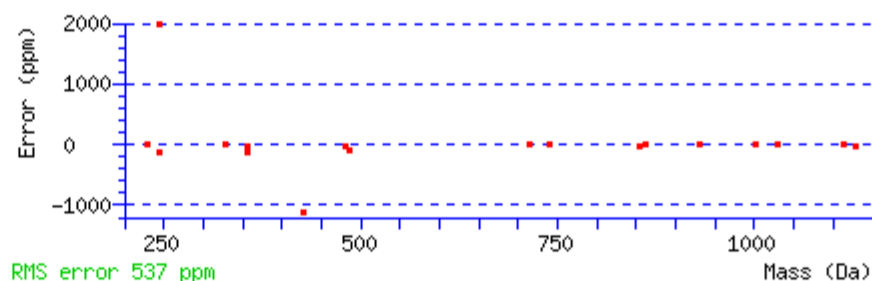

NCBI BLAST search of **LNVAFLNELPK**

(Parameters: blastp, nr protein database, expect=20000, no filter, PAM30)

Other BLAST [web gateways](#)

All matches to this query

| Score | Mr(calc):   | Delta    | Sequence                     |
|-------|-------------|----------|------------------------------|
| 52.2  | 1355.781265 | 0.002443 | <a href="#">LNVAFLNELPK</a>  |
| 2.7   | 1355.777252 | 0.006456 | <a href="#">VNLEVTGEIRVK</a> |

**Peptide View**

MS/MS Fragmentation of **LLLLVQ GK**

Found in **NOL3\_HUMAN**, Nucleolar protein 3 OS=Homo sapiens GN=NOL3 PE=1 SV=1

Match to Query 6399: 882.593608 from(442.304080,2+) rtinseconds(2545) index(30784)

Title: Locus:1.1.1.2387.5

Data file 2011-11-13 - TFD - EP 7-5.mgf

Click mouse within plot area to zoom in by factor of two about that point

Or, Plot from  to  Da

Label all possible matches  Label matches used for scoring

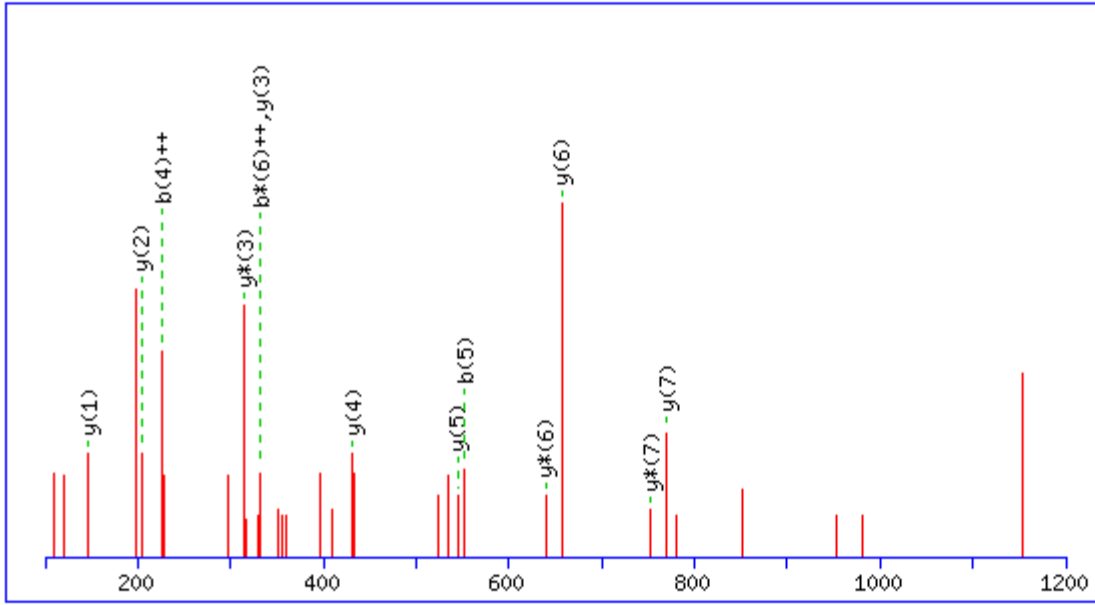

Monoisotopic mass of neutral peptide Mr(calc): 882.590225

Fixed modifications: Propionamide (C) (apply to specified residues or termini only)

Ions Score: 51 Expect: 1.4e-005

Matches : 14/46 fragment ions using 24 most intense peaks [\(help\)](#)

| # | b                 | b <sup>++</sup>   | b <sup>*</sup> | b <sup>*++</sup>  | Seq. | y                 | y <sup>++</sup> | y <sup>*</sup>    | y <sup>*++</sup> | # |
|---|-------------------|-------------------|----------------|-------------------|------|-------------------|-----------------|-------------------|------------------|---|
| 1 | 114.091340        | 57.549308         |                |                   | L    |                   |                 |                   |                  | 8 |
| 2 | <b>227.175404</b> | 114.091340        |                |                   | L    | <b>770.513452</b> | 385.760364      | <b>753.486903</b> | 377.247090       | 7 |
| 3 | 340.259468        | 170.633372        |                |                   | L    | <b>657.429388</b> | 329.218332      | <b>640.402839</b> | 320.705058       | 6 |
| 4 | 453.343532        | <b>227.175404</b> |                |                   | L    | <b>544.345324</b> | 272.676300      | 527.318775        | 264.163026       | 5 |
| 5 | <b>552.411946</b> | 276.709611        |                |                   | V    | <b>431.261260</b> | 216.134268      | 414.234711        | 207.620994       | 4 |
| 6 | 680.470524        | 340.738900        | 663.443975     | <b>332.225626</b> | Q    | <b>332.192846</b> | 166.600061      | <b>315.166297</b> | 158.086787       | 3 |
| 7 | 737.491988        | 369.249632        | 720.465439     | 360.736358        | G    | <b>204.134268</b> | 102.570772      | 187.107719        | 94.057498        | 2 |
| 8 |                   |                   |                |                   | K    | <b>147.112804</b> | 74.060040       | 130.086255        | 65.546765        | 1 |

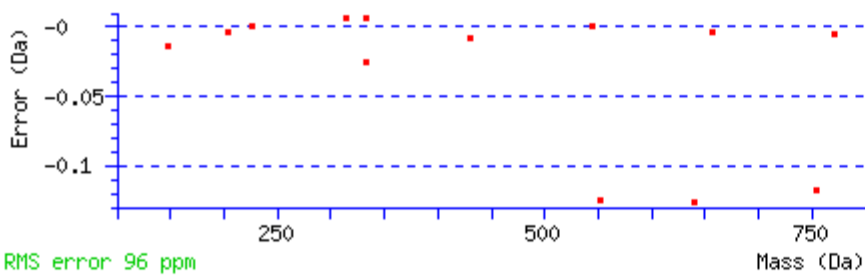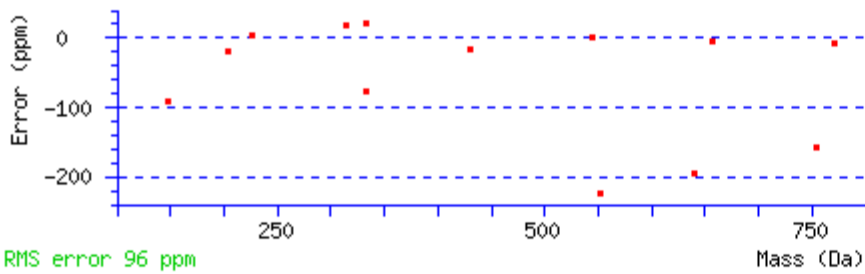

NCBI **BLAST** search of **LLLLVQ GK**

(Parameters: blastp, nr protein database, expect=20000, no filter, PAM30)

Other BLAST [web gateways](#)

**All matches to this query**

| Score | Mr(calc):  | Delta     | Sequence                  |
|-------|------------|-----------|---------------------------|
| 50.6  | 882.590225 | 0.003383  | <a href="#">LLLLVQ GK</a> |
| 8.3   | 882.590210 | 0.003398  | <a href="#">ILTPALKK</a>  |
| 8.3   | 882.601440 | -0.007832 | <a href="#">LLQRLK</a>    |
| 8.3   | 882.601440 | -0.007832 | <a href="#">LLRLLQK</a>   |
| 3.6   | 882.601440 | -0.007832 | <a href="#">LLKLQR</a>    |

# MASCOT SEARCH RESULTS

## Peptide View

MS/MS Fragmentation of **TFSFAPLIEK**

Found in **DDX21\_HUMAN**, Nucleolar RNA helicase 2 OS=Homo sapiens GN=DDX21 PE=1 SV=5

Match to Query 34581: 1264.709968 from(633.362260,2+) rtinseconds(3798) index(55951)

Title: Locus:1.1.1.2875.15

Data file 2011-11-10 - TFD - EP 3-2.mgf

Click mouse within plot area to zoom in by factor of two about that point

Or, Plot from  to  Da

Label all possible matches  Label matches used for scoring

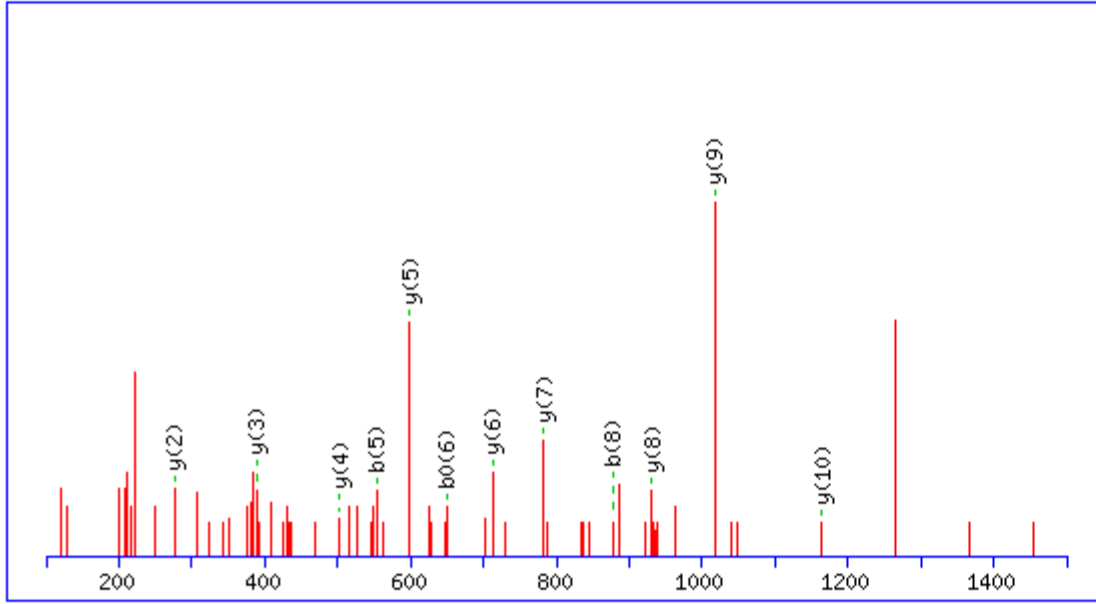

Monoisotopic mass of neutral peptide Mr(calc): 1264.706711

Fixed modifications: Propionamide (C) (apply to specified residues or termini only)

Ions Score: 54 Expect: 2e-005

Matches : 12/98 fragment ions using 30 most intense peaks ([help](#))

| #  | b           | b <sup>++</sup> | b <sup>0</sup> | b <sup>0++</sup> | Seq. | y           | y <sup>++</sup> | y <sup>*</sup> | y <sup>*++</sup> | y <sup>0</sup> | y <sup>0++</sup> | #  |
|----|-------------|-----------------|----------------|------------------|------|-------------|-----------------|----------------|------------------|----------------|------------------|----|
| 1  | 102.054955  | 51.531116       | 84.044390      | 42.525833        | T    |             |                 |                |                  |                |                  | 11 |
| 2  | 249.123369  | 125.065322      | 231.112804     | 116.060040       | F    | 1164.666323 | 582.836799      | 1147.639774    | 574.323525       | 1146.655758    | 573.831517       | 10 |
| 3  | 336.155397  | 168.581336      | 318.144832     | 159.576054       | S    | 1017.597909 | 509.302593      | 1000.571360    | 500.789318       | 999.587344     | 500.297310       | 9  |
| 4  | 483.223811  | 242.115543      | 465.213246     | 233.110261       | F    | 930.565881  | 465.786579      | 913.539332     | 457.273304       | 912.555316     | 456.781296       | 8  |
| 5  | 554.260925  | 277.634100      | 536.250360     | 268.628818       | A    | 783.497467  | 392.252372      | 766.470918     | 383.739097       | 765.486902     | 383.247089       | 7  |
| 6  | 667.344989  | 334.176132      | 649.334424     | 325.170850       | I    | 712.460353  | 356.733815      | 695.433804     | 348.220540       | 694.449788     | 347.728532       | 6  |
| 7  | 764.397753  | 382.702515      | 746.387188     | 373.697232       | P    | 599.376289  | 300.191783      | 582.349740     | 291.678508       | 581.365724     | 291.186500       | 5  |
| 8  | 877.481817  | 439.244547      | 859.471252     | 430.239264       | L    | 502.323525  | 251.665400      | 485.296976     | 243.152126       | 484.312960     | 242.660118       | 4  |
| 9  | 990.565881  | 495.786579      | 972.555316     | 486.781296       | I    | 389.239461  | 195.123368      | 372.212912     | 186.610094       | 371.228896     | 186.118086       | 3  |
| 10 | 1119.608474 | 560.307875      | 1101.597909    | 551.302592       | E    | 276.155397  | 138.581336      | 259.128848     | 130.068062       | 258.144832     | 129.576054       | 2  |
| 11 |             |                 |                |                  | K    | 147.112804  | 74.060040       | 130.086255     | 65.546765        |                |                  | 1  |

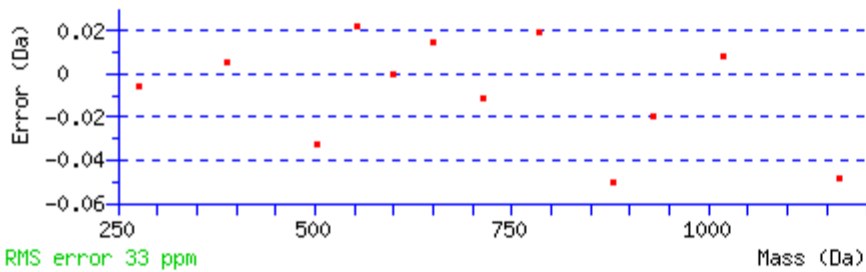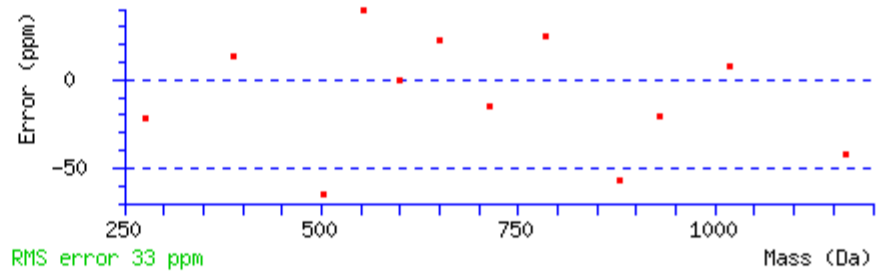

NCBI BLAST search of [TFSFAPLIEK](#)

(Parameters: blastp, nr protein database, expect=20000, no filter, PAM30)

Other BLAST [web gateways](#)

## All matches to this query

| Score | Mr(calc):   | Delta    | Sequence                   |
|-------|-------------|----------|----------------------------|
| 54.1  | 1264.706711 | 0.003257 | <a href="#">TFSFAPLIEK</a> |

Mascot: <http://www.matrixscience.com/>

# Mascot Search Results

## Peptide View

MS/MS Fragmentation of **TLTELILDAQEHVK**

Found in **UBF1\_HUMAN**, Nucleolar transcription factor 1 OS=Homo sapiens GN=UBTF PE=1 SV=1

Match to Query 52015: 1608.879822 from(537.300550,3+) rtinseconds(3392) index(48425)

Title: Locus:1.1.1.2724.8

Data file 2011-11-10 - TFD - EP 3-2.mgf

Click mouse within plot area to zoom in by factor of two about that point

Or, Plot from  to  Da

Label all possible matches  Label matches used for scoring

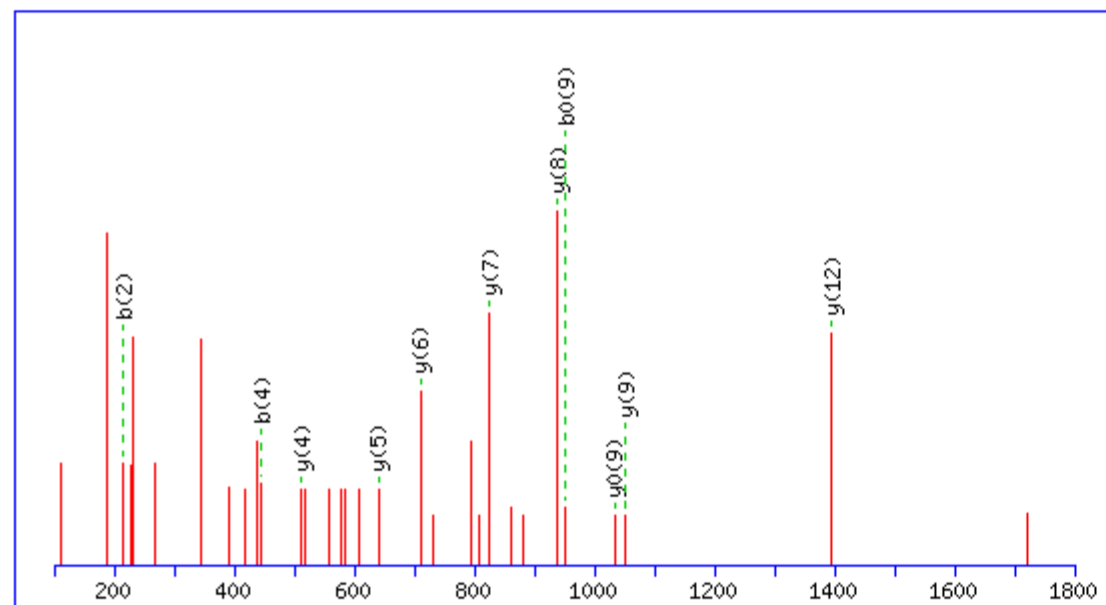

Monoisotopic mass of neutral peptide Mr(calc): 1608.872269

Fixed modifications: Propionamide (C) (apply to specified residues or termini only)

Ions Score: 41 Expect: 0.00023

Matches : 11/132 fragment ions using 20 most intense peaks ([help](#))

| #  | b                 | b <sup>++</sup> | b <sup>*</sup> | b <sup>*++</sup> | b <sup>0</sup>    | b <sup>0++</sup> | Seq. | y                  | y <sup>++</sup> | y <sup>*</sup> | y <sup>*++</sup> | y <sup>0</sup>     | y <sup>0++</sup> | #  |
|----|-------------------|-----------------|----------------|------------------|-------------------|------------------|------|--------------------|-----------------|----------------|------------------|--------------------|------------------|----|
| 1  | 102.054955        | 51.531116       |                |                  | 84.044390         | 42.525833        | T    |                    |                 |                |                  |                    |                  | 14 |
| 2  | <b>215.139019</b> | 108.073147      |                |                  | 197.128454        | 99.067865        | L    | 1508.831886        | 754.919581      | 1491.805337    | 746.406307       | 1490.821321        | 745.914299       | 13 |
| 3  | 316.186698        | 158.596987      |                |                  | 298.176133        | 149.591704       | T    | <b>1395.747822</b> | 698.377549      | 1378.721273    | 689.864275       | 1377.737257        | 689.372267       | 12 |
| 4  | <b>445.229291</b> | 223.118283      |                |                  | 427.218726        | 214.113001       | E    | 1294.700143        | 647.853710      | 1277.673594    | 639.340435       | 1276.689578        | 638.848427       | 11 |
| 5  | 558.313355        | 279.660316      |                |                  | 540.302790        | 270.655033       | L    | 1165.657550        | 583.332413      | 1148.631001    | 574.819139       | 1147.646985        | 574.327131       | 10 |
| 6  | 671.397419        | 336.202348      |                |                  | 653.386854        | 327.197065       | I    | <b>1052.573486</b> | 526.790381      | 1035.546937    | 518.277107       | <b>1034.562921</b> | 517.785099       | 9  |
| 7  | 784.481483        | 392.744380      |                |                  | 766.470918        | 383.739097       | L    | <b>939.489422</b>  | 470.248349      | 922.462873     | 461.735075       | 921.478857         | 461.243067       | 8  |
| 8  | 899.508426        | 450.257851      |                |                  | 881.497861        | 441.252569       | D    | <b>826.405358</b>  | 413.706317      | 809.378809     | 405.193043       | 808.394793         | 404.701035       | 7  |
| 9  | 970.545540        | 485.776408      |                |                  | <b>952.534975</b> | 476.771125       | A    | <b>711.378415</b>  | 356.192846      | 694.351866     | 347.679571       | 693.367850         | 347.187563       | 6  |
| 10 | 1098.604118       | 549.805697      | 1081.577569    | 541.292423       | 1080.593553       | 540.800414       | Q    | <b>640.341301</b>  | 320.674289      | 623.314752     | 312.161014       | 622.330736         | 311.669006       | 5  |
| 11 | 1227.646711       | 614.326994      | 1210.620162    | 605.813719       | 1209.636146       | 605.321711       | E    | <b>512.282723</b>  | 256.645000      | 495.256174     | 248.131725       | 494.272158         | 247.639717       | 4  |
| 12 | 1364.705623       | 682.856450      | 1347.679074    | 674.343175       | 1346.695058       | 673.851167       | H    | 383.240130         | 192.123703      | 366.213581     | 183.610429       |                    |                  | 3  |
| 13 | 1463.774037       | 732.390657      | 1446.747488    | 723.877382       | 1445.763472       | 723.385374       | V    | 246.181218         | 123.594247      | 229.154669     | 115.080973       |                    |                  | 2  |
| 14 |                   |                 |                |                  |                   |                  | K    | 147.112804         | 74.060040       | 130.086255     | 65.546765        |                    |                  | 1  |

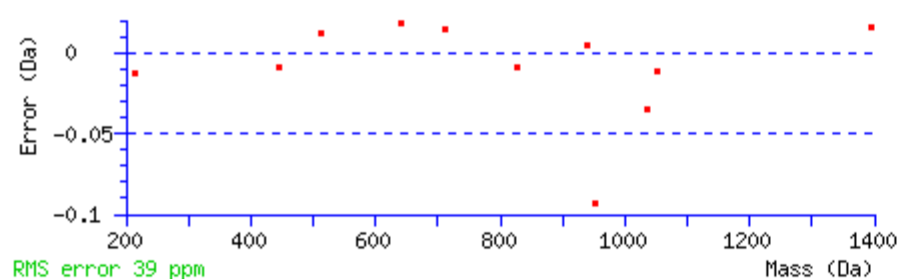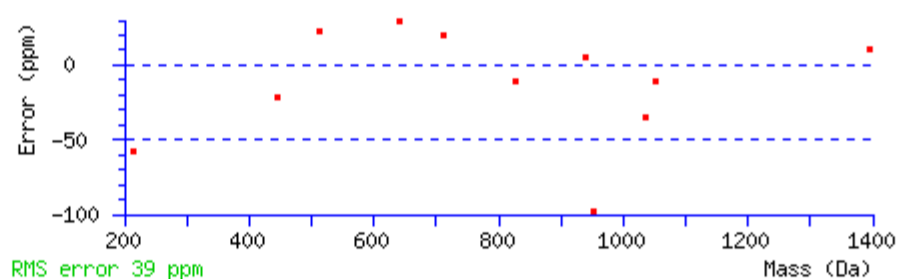

NCBI BLAST search of **TLTELILDAQEHVK**

(Parameters: blastp, nr protein database, expect=20000, no filter, PAM30)

Other BLAST [web gateways](#)

All matches to this query

| Score | Mr(calc):   | Delta    | Sequence                       |
|-------|-------------|----------|--------------------------------|
| 40.7  | 1608.872269 | 0.007553 | <a href="#">TLTELILDAQEHVK</a> |
| 2.0   | 1608.879654 | 0.000168 | <a href="#">LTDKDYMKPLLLK</a>  |



**MATRIX SCIENCE Mascot Search Results**

**Peptide View**

MS/MS Fragmentation of **LATCSADGIVR**

Found in **SEH1\_HUMAN**, Nucleoporin SEH1 OS=Homo sapiens GN=SEH1L PE=1 SV=3

Match to Query 473471: 1161.580208 from(581.797380,2+) rtinseconds(1622) index(422638)

Title: Locus:1.1.1.958.29

Data file C:\Program Files (x86)\Matrix Science\Mascot Daemon\mgf3 TFD - Epitel - R2\mascot\_daemon\_merge.mgf

Click mouse within plot area to zoom in by factor of two about that point

Or, Plot from  to  Da

Label all possible matches  Label matches used for scoring

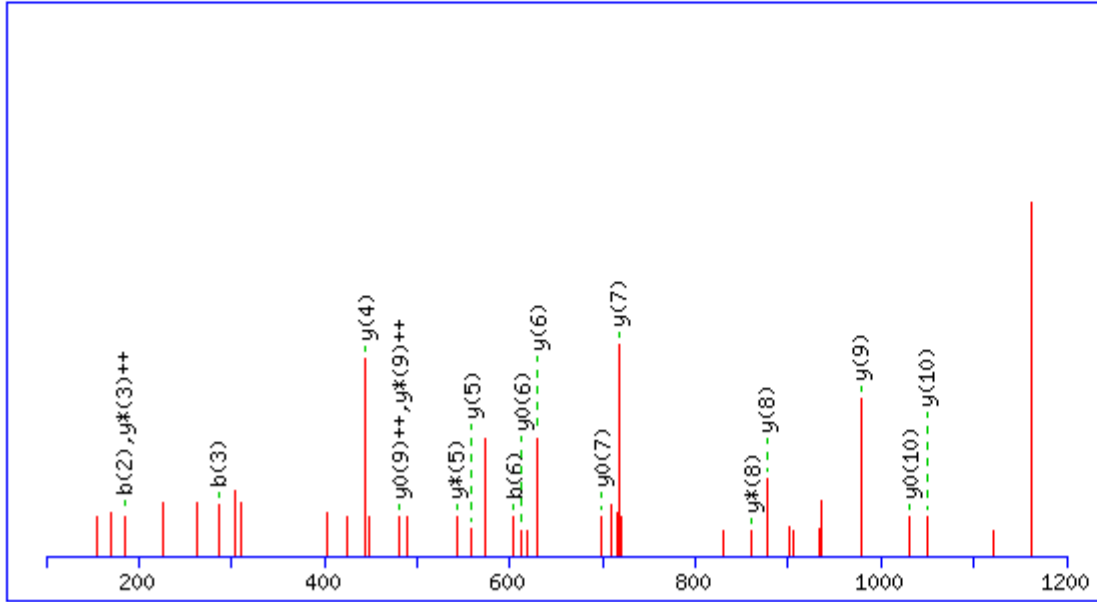

Monoisotopic mass of neutral peptide Mr(calc): 1161.581207

Fixed modifications: Carbamidomethyl (C) (apply to specified residues or termini only)

Ions Score: 39 Expect: 0.00054

Matches : 18/88 fragment ions using 35 most intense peaks [\(help\)](#)

| #  | b                 | b <sup>++</sup> | b <sup>0</sup> | b <sup>0++</sup> | Seq. | y                  | y <sup>++</sup> | y <sup>*</sup>    | y <sup>+++</sup>  | y <sup>0</sup>     | y <sup>0++</sup>  | #  |
|----|-------------------|-----------------|----------------|------------------|------|--------------------|-----------------|-------------------|-------------------|--------------------|-------------------|----|
| 1  | 114.091340        | 57.549308       |                |                  | L    |                    |                 |                   |                   |                    |                   | 11 |
| 2  | <b>185.128454</b> | 93.067865       |                |                  | A    | <b>1049.504421</b> | 525.255849      | 1032.477872       | 516.742574        | <b>1031.493856</b> | 516.250566        | 10 |
| 3  | <b>286.176133</b> | 143.591704      | 268.165568     | 134.586422       | T    | <b>978.467307</b>  | 489.737292      | 961.440758        | <b>481.224017</b> | 960.456742         | <b>480.732009</b> | 9  |
| 4  | 446.206782        | 223.607029      | 428.196217     | 214.601747       | C    | <b>877.419628</b>  | 439.213452      | <b>860.393079</b> | 430.700178        | 859.409063         | 430.208170        | 8  |
| 5  | 533.238810        | 267.123043      | 515.228245     | 258.117761       | S    | <b>717.388979</b>  | 359.198128      | 700.362430        | 350.684853        | <b>699.378414</b>  | 350.192845        | 7  |
| 6  | <b>604.275924</b> | 302.641600      | 586.265359     | 293.636318       | A    | <b>630.356951</b>  | 315.682114      | 613.330402        | 307.168839        | <b>612.346386</b>  | 306.676831        | 6  |
| 7  | 719.302867        | 360.155072      | 701.292302     | 351.149789       | D    | <b>559.319837</b>  | 280.163557      | <b>542.293288</b> | 271.650282        | 541.309272         | 271.158274        | 5  |
| 8  | 776.324331        | 388.665804      | 758.313766     | 379.660521       | G    | <b>444.292894</b>  | 222.650085      | 427.266345        | 214.136810        |                    |                   | 4  |
| 9  | 889.408395        | 445.207836      | 871.397830     | 436.202553       | I    | 387.271430         | 194.139353      | 370.244881        | <b>185.626078</b> |                    |                   | 3  |
| 10 | 988.476809        | 494.742043      | 970.466244     | 485.736760       | V    | 274.187366         | 137.597321      | 257.160817        | 129.084046        |                    |                   | 2  |
| 11 |                   |                 |                |                  | R    | 175.118952         | 88.063114       | 158.092403        | 79.549839         |                    |                   | 1  |

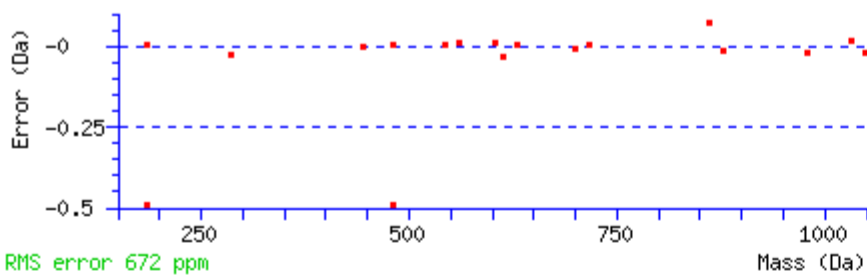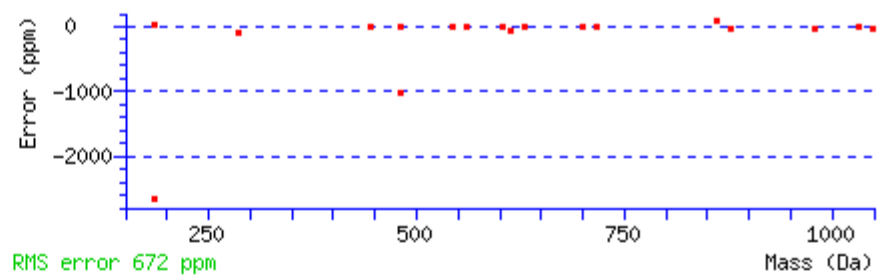

NCBI BLAST search of [LATCSADGIVR](#)

(Parameters: blastp, nr protein database, expect=20000, no filter, PAM30)

Other BLAST [web gateways](#)

**All matches to this query**

| Score | Mr(calc):   | Delta     | Sequence                    |
|-------|-------------|-----------|-----------------------------|
| 39.3  | 1161.581207 | -0.000999 | <a href="#">LATCSADGIVR</a> |
| 4.3   | 1161.585861 | -0.005653 | <a href="#">LATFWYYAK</a>   |
| 4.0   | 1161.589066 | -0.008858 | <a href="#">APLRFQGDSR</a>  |
| 3.6   | 1161.581207 | -0.000999 | <a href="#">MSGRVGDLSPK</a> |
| 1.0   | 1161.577362 | 0.002846  | <a href="#">VQLIAMDLPM</a>  |
| 1.0   | 1161.577362 | 0.002846  | <a href="#">VQLIAMDLPM</a>  |
| 1.0   | 1161.577362 | 0.002846  | <a href="#">VQLIAMDLPM</a>  |

# MASCOT Search Results

## Peptide View

MS/MS Fragmentation of **ISNIPSLIFLDATTGK**

Found in **NXN\_HUMAN**, Nucleoredoxin OS=Homo sapiens GN=NXN PE=1 SV=2

Match to Query 50028: 1688.942508 from(845.478530,2+) rtinseconds(3911) index(59141)

Title: Locus:1.1.1.2977.25

Data file 2011-11-10 - TFD - EP 4-3.mgf

Click mouse within plot area to zoom in by factor of two about that point

Or, Plot from  to  Da

Label all possible matches  Label matches used for scoring

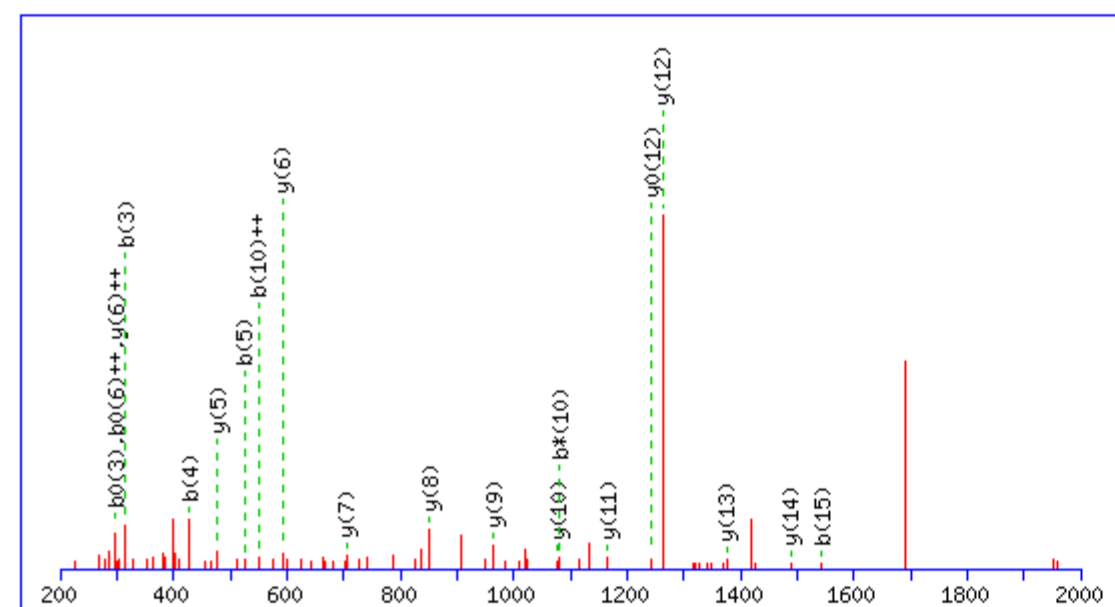

Monoisotopic mass of neutral peptide Mr(calc): 1688.934875

Fixed modifications: Propionamide (C) (apply to specified residues or termini only)

Ions Score: 58 Expect: 5.3e-006

Matches: 20/170 fragment ions using 37 most intense peaks [\(help\)](#)

| #  | b                  | b <sup>++</sup>   | b <sup>*</sup>     | b <sup>++</sup> | b <sup>0</sup>    | b <sup>0++</sup>  | Seq. | y                  | y <sup>++</sup>   | y <sup>*</sup> | y <sup>++</sup> | y <sup>0</sup>     | y <sup>0++</sup> | #  |
|----|--------------------|-------------------|--------------------|-----------------|-------------------|-------------------|------|--------------------|-------------------|----------------|-----------------|--------------------|------------------|----|
| 1  | 114.091340         | 57.549308         |                    |                 |                   |                   | I    |                    |                   |                |                 |                    |                  | 16 |
| 2  | 201.123368         | 101.065322        |                    |                 | 183.112803        | 92.060039         | S    | 1576.858100        | 788.932688        | 1559.831551    | 780.419414      | 1558.847535        | 779.927406       | 15 |
| 3  | <b>315.166295</b>  | 158.086785        | 298.139746         | 149.573511      | <b>297.155730</b> | 149.081503        | N    | <b>1489.826072</b> | 745.416674        | 1472.799523    | 736.903400      | 1471.815507        | 736.411392       | 14 |
| 4  | <b>428.250359</b>  | 214.628818        | 411.223810         | 206.115543      | 410.239794        | 205.623535        | I    | <b>1375.783145</b> | 688.395211        | 1358.756596    | 679.881936      | 1357.772580        | 679.389928       | 13 |
| 5  | <b>525.303123</b>  | 263.155200        | 508.276574         | 254.641925      | 507.292558        | 254.149917        | P    | <b>1262.699081</b> | 631.853179        | 1245.672532    | 623.339904      | <b>1244.688516</b> | 622.847896       | 12 |
| 6  | 612.335151         | 306.671214        | 595.308602         | 298.157939      | 594.324586        | <b>297.665931</b> | S    | <b>1165.646317</b> | 583.326797        | 1148.619768    | 574.813522      | 1147.635752        | 574.321514       | 11 |
| 7  | 725.419215         | 363.213246        | 708.392666         | 354.699971      | 707.408650        | 354.207963        | L    | <b>1078.614289</b> | 539.810783        | 1061.587740    | 531.297508      | 1060.603724        | 530.805500       | 10 |
| 8  | 838.503279         | 419.755278        | 821.476730         | 411.242003      | 820.492714        | 410.749995        | I    | <b>965.530225</b>  | 483.268751        | 948.503676     | 474.755476      | 947.519660         | 474.263468       | 9  |
| 9  | 985.571693         | 493.289485        | 968.545144         | 484.776210      | 967.561128        | 484.284202        | F    | <b>852.446161</b>  | 426.726719        | 835.419612     | 418.213444      | 834.435596         | 417.721436       | 8  |
| 10 | 1098.655757        | <b>549.831517</b> | <b>1081.629208</b> | 541.318242      | 1080.645192       | 540.826234        | L    | <b>705.377747</b>  | 353.192512        | 688.351198     | 344.679237      | 687.367182         | 344.187229       | 7  |
| 11 | 1213.682700        | 607.344988        | 1196.656151        | 598.831714      | 1195.672135       | 598.339706        | D    | <b>592.293683</b>  | <b>296.650480</b> | 575.267134     | 288.137205      | 574.283118         | 287.645197       | 6  |
| 12 | 1284.719814        | 642.863545        | 1267.693265        | 634.350271      | 1266.709249       | 633.858263        | A    | <b>477.266740</b>  | 239.137008        | 460.240191     | 230.623733      | 459.256175         | 230.131725       | 5  |
| 13 | 1385.767493        | 693.387385        | 1368.740944        | 684.874110      | 1367.756928       | 684.382102        | T    | 406.229626         | 203.618451        | 389.203077     | 195.105176      | 388.219061         | 194.613168       | 4  |
| 14 | 1486.815172        | 743.911224        | 1469.788623        | 735.397950      | 1468.804607       | 734.905942        | T    | 305.181947         | 153.094611        | 288.155398     | 144.581337      | 287.171382         | 144.089329       | 3  |
| 15 | <b>1543.836636</b> | 772.421956        | 1526.810087        | 763.908682      | 1525.826071       | 763.416674        | G    | 204.134268         | 102.570772        | 187.107719     | 94.057497       |                    |                  | 2  |
| 16 |                    |                   |                    |                 |                   |                   | K    | 147.112804         | 74.060040         | 130.086255     | 65.546765       |                    |                  | 1  |

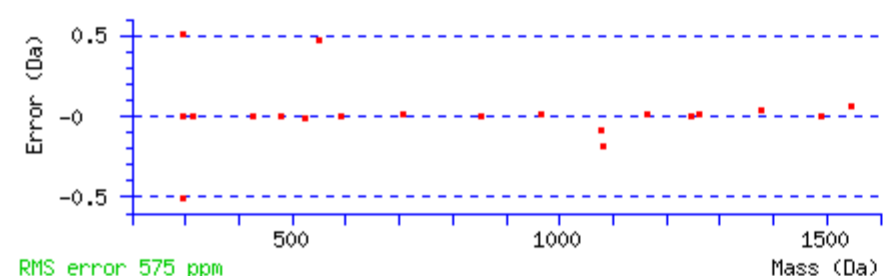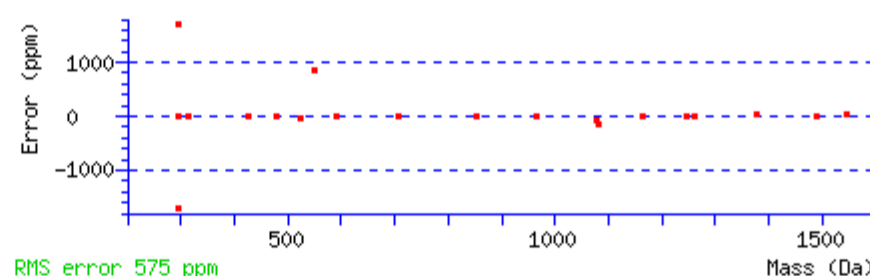

NCBI BLAST search of [ISNIPSLIFLDATTGK](#)

(Parameters: blastp, nr protein database, expect=20000, no filter, PAM30)

Other BLAST [web gateways](#)

All matches to this query

| Score | Mr(calc):   | Delta     | Sequence                         |
|-------|-------------|-----------|----------------------------------|
| 58.4  | 1688.934875 | 0.007633  | <a href="#">ISNIPSLIFLDATTGK</a> |
| 5.3   | 1688.934845 | 0.007663  | <a href="#">SLAPEPKEPLIPASPK</a> |
| 3.1   | 1688.934845 | 0.007663  | <a href="#">SLAPEPKEPLIPASPK</a> |
| 2.7   | 1688.950806 | -0.008298 | <a href="#">LLHGVMEQLGIARPR</a>  |
| 0.9   | 1688.934845 | 0.007663  | <a href="#">SLAPEPKEPLIPASPK</a> |

**Peptide View**

MS/MS Fragmentation of **SVPLAATSMLITQGLISK**

Found in **OCADI\_HUMAN**, OCIA domain-containing protein 1 OS=Homo sapiens GN=OCIAD1 PE=1 SV=1

Match to Query 59319: 1845.034362 from(616.018730,3+) rtinseconds(3576) index(52330)

Title: Locus:1.1.1.2700.12

Data file 2011-11-10 - TFD - EP 3-4.mgf

Click mouse within plot area to zoom in by factor of two about that point

Or, Plot from  to  Da

Label all possible matches  Label matches used for scoring

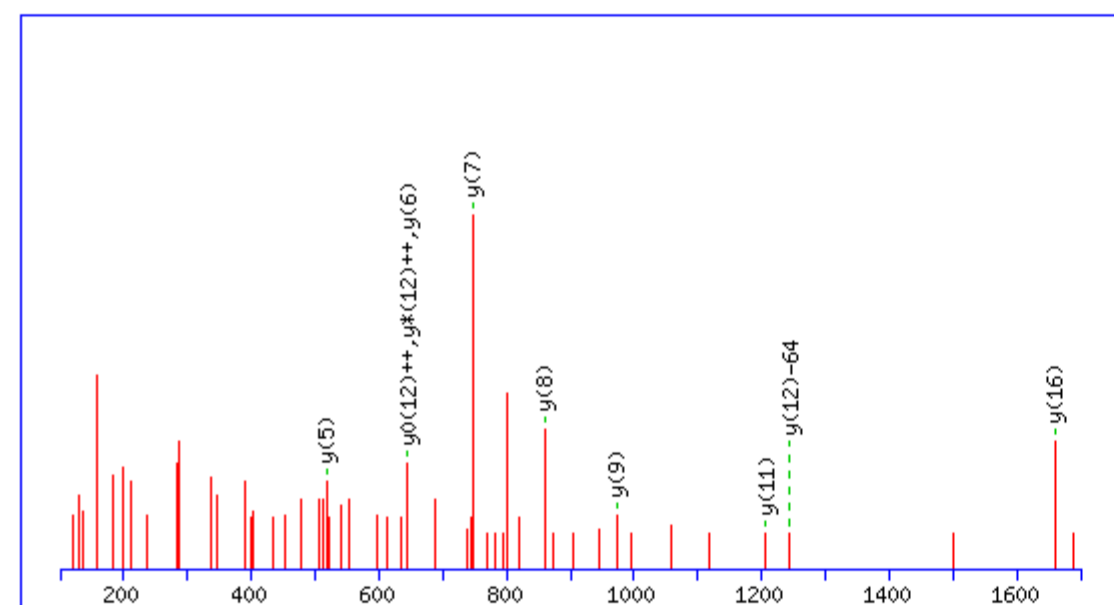

Monoisotopic mass of neutral peptide Mr(calc): 1845.028122

Fixed modifications: Propionamide (C) (apply to specified residues or termini only)

Variable modifications:

M9 : Oxidation (M), with neutral losses 0.000000 (shown in table), 63.998285

Ions Score: 40 Expect: 0.0003

Matches : 10/272 fragment ions using 14 most intense peaks [\(help\)](#)

| #  | b           | b <sup>++</sup> | b <sup>*</sup> | b <sup>++</sup> | b <sup>0</sup> | b <sup>0++</sup> | Seq. | y                  | y <sup>++</sup> | y <sup>*</sup> | y <sup>++</sup>   | y <sup>0</sup> | y <sup>0++</sup>  | #  |
|----|-------------|-----------------|----------------|-----------------|----------------|------------------|------|--------------------|-----------------|----------------|-------------------|----------------|-------------------|----|
| 1  | 88.039304   | 44.523290       |                |                 | 70.028739      | 35.518008        | S    |                    |                 |                |                   |                |                   | 18 |
| 2  | 187.107718  | 94.057497       |                |                 | 169.097153     | 85.052214        | V    | 1759.003386        | 880.005331      | 1741.976837    | 871.492056        | 1740.992821    | 871.000048        | 17 |
| 3  | 284.160482  | 142.583879      |                |                 | 266.149917     | 133.578596       | P    | <b>1659.934972</b> | 830.471124      | 1642.908423    | 821.957849        | 1641.924407    | 821.465841        | 16 |
| 4  | 397.244546  | 199.125911      |                |                 | 379.233981     | 190.120628       | L    | 1562.882208        | 781.944742      | 1545.855659    | 773.431467        | 1544.871643    | 772.939459        | 15 |
| 5  | 468.281660  | 234.644468      |                |                 | 450.271095     | 225.639185       | A    | 1449.798144        | 725.402710      | 1432.771595    | 716.889435        | 1431.787579    | 716.397427        | 14 |
| 6  | 539.318774  | 270.163025      |                |                 | 521.308209     | 261.157742       | A    | 1378.761030        | 689.884153      | 1361.734481    | 681.370879        | 1360.750465    | 680.878870        | 13 |
| 7  | 640.366453  | 320.686865      |                |                 | 622.355888     | 311.681582       | T    | 1307.723916        | 654.365596      | 1290.697367    | <b>645.852321</b> | 1289.713351    | <b>645.360313</b> | 12 |
| 8  | 727.398481  | 364.202879      |                |                 | 709.387916     | 355.197596       | S    | <b>1206.676237</b> | 603.841756      | 1189.649688    | 595.328482        | 1188.665672    | 594.836474        | 11 |
| 9  | 874.433881  | 437.720578      |                |                 | 856.423316     | 428.715296       | M    | 1119.644209        | 560.325742      | 1102.617660    | 551.812468        | 1101.633644    | 551.320460        | 10 |
| 10 | 987.517945  | 494.262610      |                |                 | 969.507380     | 485.257328       | L    | <b>972.608809</b>  | 486.808042      | 955.582260     | 478.294768        | 954.598244     | 477.802760        | 9  |
| 11 | 1100.602009 | 550.804643      |                |                 | 1082.591444    | 541.799360       | I    | <b>859.524745</b>  | 430.266010      | 842.498196     | 421.752736        | 841.514180     | 421.260728        | 8  |
| 12 | 1201.649688 | 601.328482      |                |                 | 1183.639123    | 592.323199       | T    | <b>746.440681</b>  | 373.723978      | 729.414132     | 365.210704        | 728.430116     | 364.718696        | 7  |
| 13 | 1329.708266 | 665.357771      | 1312.681717    | 656.844496      | 1311.697701    | 656.352488       | Q    | <b>645.393002</b>  | 323.200139      | 628.366453     | 314.686864        | 627.382437     | 314.194856        | 6  |
| 14 | 1386.729730 | 693.868503      | 1369.703181    | 685.355228      | 1368.719165    | 684.863220       | G    | <b>517.334424</b>  | 259.170850      | 500.307875     | 250.657575        | 499.323859     | 250.165567        | 5  |
| 15 | 1499.813794 | 750.410535      | 1482.787245    | 741.897260      | 1481.803229    | 741.405252       | L    | 460.312960         | 230.660118      | 443.286411     | 222.146843        | 442.302395     | 221.654835        | 4  |
| 16 | 1612.897858 | 806.952567      | 1595.871309    | 798.439292      | 1594.887293    | 797.947284       | I    | 347.228896         | 174.118086      | 330.202347     | 165.604811        | 329.218331     | 165.112803        | 3  |
| 17 | 1699.929886 | 850.468581      | 1682.903337    | 841.955306      | 1681.919321    | 841.463298       | S    | 234.144832         | 117.576054      | 217.118283     | 109.062780        | 216.134267     | 108.570772        | 2  |
| 18 |             |                 |                |                 |                |                  | K    | 147.112804         | 74.060040       | 130.086255     | 65.546765         |                |                   | 1  |

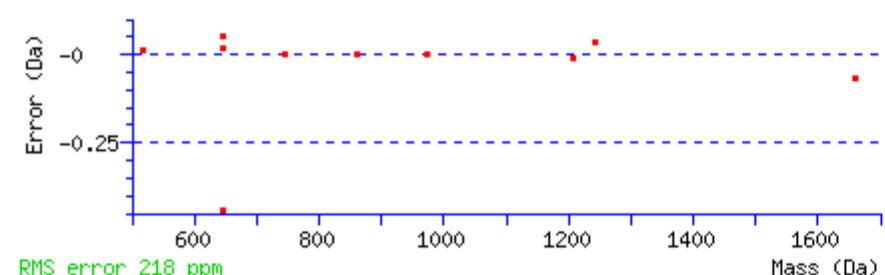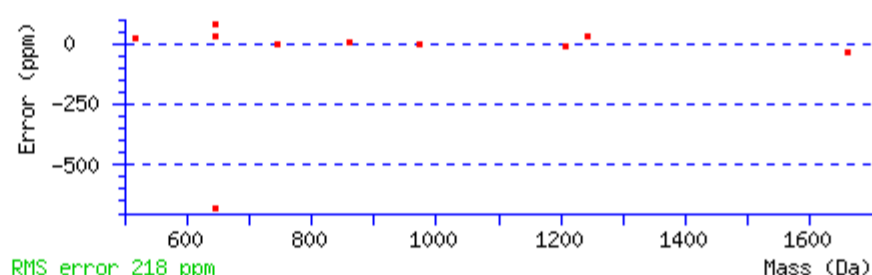

NCBI BLAST search of **SVPLAATSMLITQGLISK**

(Parameters: blastp, nr protein database, expect=20000, no filter, PAM30)

Other BLAST [web gateways](#)

All matches to this query

| Score | Mr(calc):   | Delta     | Sequence                           |
|-------|-------------|-----------|------------------------------------|
| 40.1  | 1845.028122 | 0.006240  | <a href="#">SVPLAATSMLITQGLISK</a> |
| 25.6  | 1845.028122 | 0.006240  | <a href="#">SVPLAATSMLITQGLISK</a> |
| 0.4   | 1845.022049 | 0.012313  | <a href="#">EPLPSRPLNARPGPGKK</a>  |
| 0.4   | 1845.035965 | -0.001603 | <a href="#">KLPELAAGVAPEPPLATR</a> |

# **MASCOT** Mascot Search Results

## Peptide View

MS/MS Fragmentation of **ALDDISESIK**

Found in **ORN\_HUMAN**, Oligoribonuclease, mitochondrial OS=Homo sapiens GN=REXO2 PE=1 SV=3

Match to Query 21649: 1089.554528 from(545.784540,2+) rtinseconds(2171) index(21690)

Title: Locus:1.1.1.2412.25

Data file 2011-11-12 - TFD - EP 5-5.mgf

Click mouse within plot area to zoom in by factor of two about that point

Or,   to  Da

Label all possible matches  Label matches used for scoring

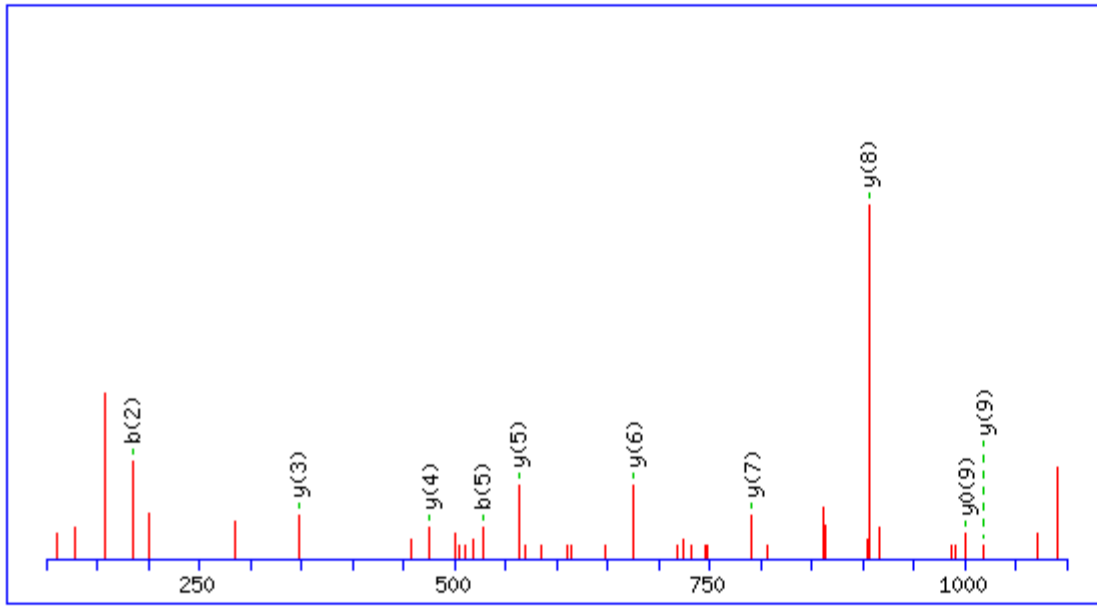

Monoisotopic mass of neutral peptide Mr(calc): 1089.555344

Fixed modifications: Propionamide (C) (apply to specified residues or termini only)

Ions Score: 51 Expect: 0.00012

Matches : 10/82 fragment ions using 18 most intense peaks [\(help\)](#)

| #  | b                 | b <sup>++</sup> | b <sup>0</sup> | b <sup>0++</sup> | Seq. | y                  | y <sup>++</sup> | y <sup>*</sup> | y <sup>++</sup> | y <sup>0</sup>     | y <sup>0++</sup> | #  |
|----|-------------------|-----------------|----------------|------------------|------|--------------------|-----------------|----------------|-----------------|--------------------|------------------|----|
| 1  | 72.044390         | 36.525833       |                |                  | A    |                    |                 |                |                 |                    |                  | 10 |
| 2  | <b>185.128454</b> | 93.067865       |                |                  | L    | <b>1019.525531</b> | 510.266404      | 1002.498982    | 501.753129      | <b>1001.514966</b> | 501.261121       | 9  |
| 3  | 300.155397        | 150.581336      | 282.144832     | 141.576054       | D    | <b>906.441467</b>  | 453.724372      | 889.414918     | 445.211097      | 888.430902         | 444.719089       | 8  |
| 4  | 415.182340        | 208.094808      | 397.171775     | 199.089526       | D    | <b>791.414524</b>  | 396.210900      | 774.387975     | 387.697626      | 773.403959         | 387.205618       | 7  |
| 5  | <b>528.266404</b> | 264.636840      | 510.255839     | 255.631558       | I    | <b>676.387581</b>  | 338.697429      | 659.361032     | 330.184154      | 658.377016         | 329.692146       | 6  |
| 6  | 615.298432        | 308.152854      | 597.287867     | 299.147572       | S    | <b>563.303517</b>  | 282.155397      | 546.276968     | 273.642122      | 545.292952         | 273.150114       | 5  |
| 7  | 744.341025        | 372.674151      | 726.330460     | 363.668868       | E    | <b>476.271489</b>  | 238.639383      | 459.244940     | 230.126108      | 458.260924         | 229.634100       | 4  |
| 8  | 831.373053        | 416.190165      | 813.362488     | 407.184882       | S    | <b>347.228896</b>  | 174.118086      | 330.202347     | 165.604812      | 329.218331         | 165.112804       | 3  |
| 9  | 944.457117        | 472.732197      | 926.446552     | 463.726914       | I    | 260.196868         | 130.602072      | 243.170319     | 122.088798      |                    |                  | 2  |
| 10 |                   |                 |                |                  | K    | 147.112804         | 74.060040       | 130.086255     | 65.546766       |                    |                  | 1  |

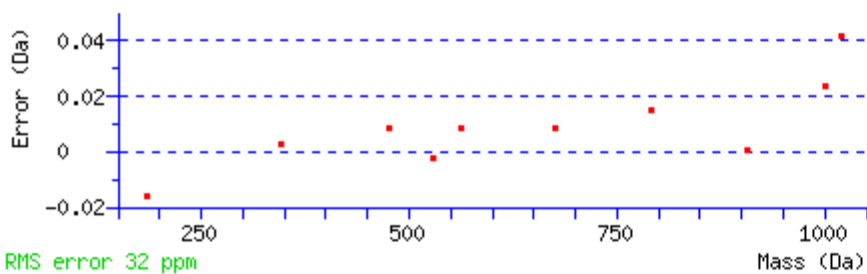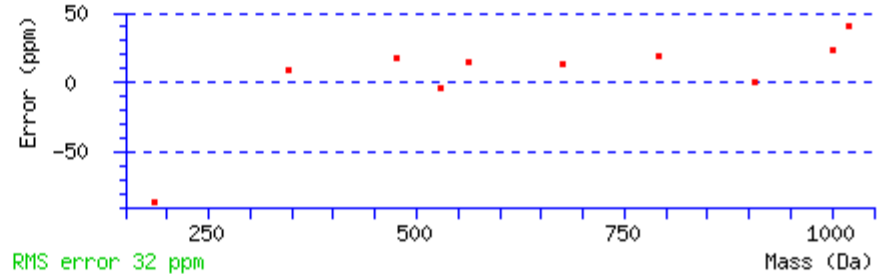

NCBI BLAST search of **ALDDISESIK**

(Parameters: blastp, nr protein database, expect=20000, no filter, PAM30)

Other BLAST [web gateways](#)

All matches to this query

| Score | Mr(calc):   | Delta     | Sequence                   |
|-------|-------------|-----------|----------------------------|
| 50.6  | 1089.555344 | -0.000816 | <a href="#">ALDDISESIK</a> |
| 9.5   | 1089.548828 | 0.005700  | <a href="#">AIDATLMSPR</a> |
| 9.5   | 1089.548828 | 0.005700  | <a href="#">AIDATLMSPR</a> |
| 9.5   | 1089.548813 | 0.005715  | <a href="#">ALDLENIMR</a>  |
| 6.9   | 1089.548828 | 0.005700  | <a href="#">ALEMPQITR</a>  |
| 6.8   | 1089.556671 | -0.002143 | <a href="#">REEEKPFR</a>   |
| 4.4   | 1089.545441 | 0.009087  | <a href="#">AINNSFAPEK</a> |
| 3.5   | 1089.549484 | 0.005044  | <a href="#">PWPFSSESIK</a> |
| 2.8   | 1089.560059 | -0.005531 | <a href="#">RVAMIDETR</a>  |
| 0.4   | 1089.548828 | 0.005700  | <a href="#">SPEVKLMDR</a>  |

Mascot: <http://www.matrixscience.com/>

# Mascot Search Results

## Peptide View

MS/MS Fragmentation of **VPFLVLECPNLK**

Found in **OSTC\_HUMAN**, Oligosaccharyltransferase complex subunit OSTC OS=Homo sapiens GN=OSTC PE=1 SV=1

Match to Query 38687: 1441.801388 from(721.907970,2+) rtinseconds(3462) index(39892)

Title: Locus:1.1.1.2651.27

Data file 2011-11-12 - TFD - EP 6-7.mgf

Click mouse within plot area to zoom in by factor of two about that point

Or, Plot from  to  Da

Label all possible matches  Label matches used for scoring

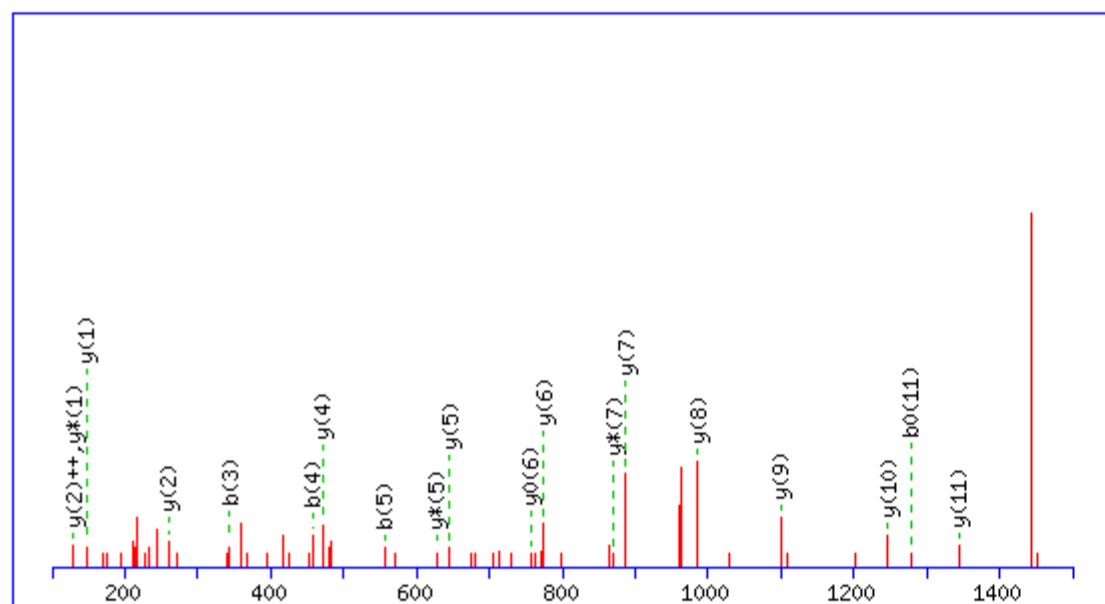

Monoisotopic mass of neutral peptide  $M_r(\text{calc})$ : 1441.800293

Fixed modifications: Propionamide (C) (apply to specified residues or termini only)

Ions Score: 62 Expect: 3.6e-006

Matches : 19/92 fragment ions using 40 most intense peaks ([help](#))

| #  | b           | b <sup>++</sup> | b <sup>*</sup> | b <sup>*++</sup> | b <sup>0</sup> | b <sup>0++</sup> | Seq. | y           | y <sup>++</sup> | y <sup>*</sup> | y <sup>*++</sup> | y <sup>0</sup> | y <sup>0++</sup> | #  |
|----|-------------|-----------------|----------------|------------------|----------------|------------------|------|-------------|-----------------|----------------|------------------|----------------|------------------|----|
| 1  | 100.075690  | 50.541483       |                |                  |                |                  | V    |             |                 |                |                  |                |                  | 12 |
| 2  | 197.128454  | 99.067865       |                |                  |                |                  | P    | 1343.739171 | 672.373223      | 1326.712622    | 663.859949       | 1325.728606    | 663.367941       | 11 |
| 3  | 344.196868  | 172.602072      |                |                  |                |                  | F    | 1246.686407 | 623.846841      | 1229.659858    | 615.333567       | 1228.675842    | 614.841559       | 10 |
| 4  | 457.280932  | 229.144104      |                |                  |                |                  | L    | 1099.617993 | 550.312634      | 1082.591444    | 541.799360       | 1081.607428    | 541.307352       | 9  |
| 5  | 556.349346  | 278.678311      |                |                  |                |                  | V    | 986.533929  | 493.770602      | 969.507380     | 485.257328       | 968.523364     | 484.765320       | 8  |
| 6  | 669.433410  | 335.220343      |                |                  |                |                  | L    | 887.465515  | 444.236395      | 870.438966     | 435.723121       | 869.454950     | 435.231113       | 7  |
| 7  | 798.476003  | 399.741640      |                |                  | 780.465438     | 390.736357       | E    | 774.381451  | 387.694363      | 757.354902     | 379.181089       | 756.370886     | 378.689081       | 6  |
| 8  | 972.522302  | 486.764789      |                |                  | 954.511737     | 477.759506       | C    | 645.338858  | 323.173067      | 628.312309     | 314.659792       |                |                  | 5  |
| 9  | 1069.575066 | 535.291171      |                |                  | 1051.564501    | 526.285888       | P    | 471.292559  | 236.149917      | 454.266010     | 227.636643       |                |                  | 4  |
| 10 | 1183.617993 | 592.312634      | 1166.591444    | 583.799360       | 1165.607428    | 583.307352       | N    | 374.239795  | 187.623535      | 357.213246     | 179.110261       |                |                  | 3  |
| 11 | 1296.702057 | 648.854666      | 1279.675508    | 640.341392       | 1278.691492    | 639.849384       | L    | 260.196868  | 130.602072      | 243.170319     | 122.088797       |                |                  | 2  |
| 12 |             |                 |                |                  |                |                  | K    | 147.112804  | 74.060040       | 130.086255     | 65.546765        |                |                  | 1  |

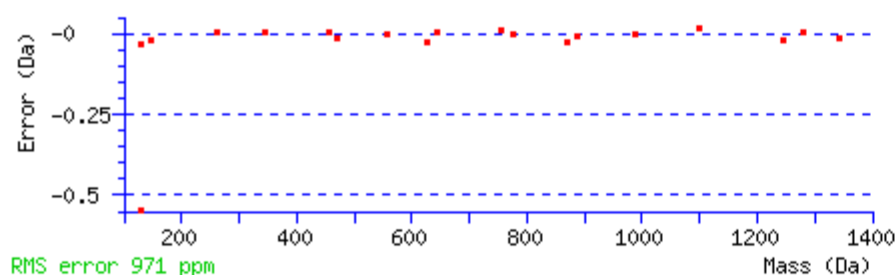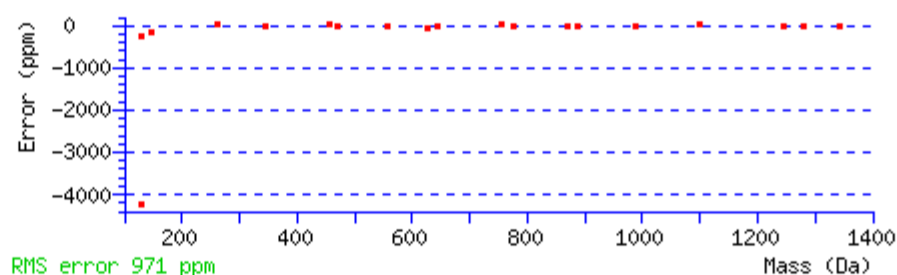

NCBI BLAST search of **VPFLVLECPNLK**

(Parameters: blastp, nr protein database, expect=20000, no filter, PAM30)

Other BLAST [web gateways](#)

All matches to this query

| Score | $M_r(\text{calc})$ : | Delta     | Sequence                     |
|-------|----------------------|-----------|------------------------------|
| 62.1  | 1441.800293          | 0.001095  | <a href="#">VPFLVLECPNLK</a> |
| 4.1   | 1441.814011          | -0.012623 | <a href="#">ITELLNDVERLK</a> |

# Mascot Search Results

## Peptide View

MS/MS Fragmentation of **GTPFETPDQ GK**

Found in **ORML1\_HUMAN**, ORM1-like protein 1 OS=Homo sapiens GN=ORMDL1 PE=2 SV=1

Match to Query 26581: 1175.546228 from(588.780390,2+) rtinseconds(1601) index(7923)

Title: Locus:1.1.1.2066.25

Data file 2011-11-10 - TFD - EP 4-7.mgf

Click mouse within plot area to zoom in by factor of two about that point

Or, Plot from  to  Da

Label all possible matches  Label matches used for scoring

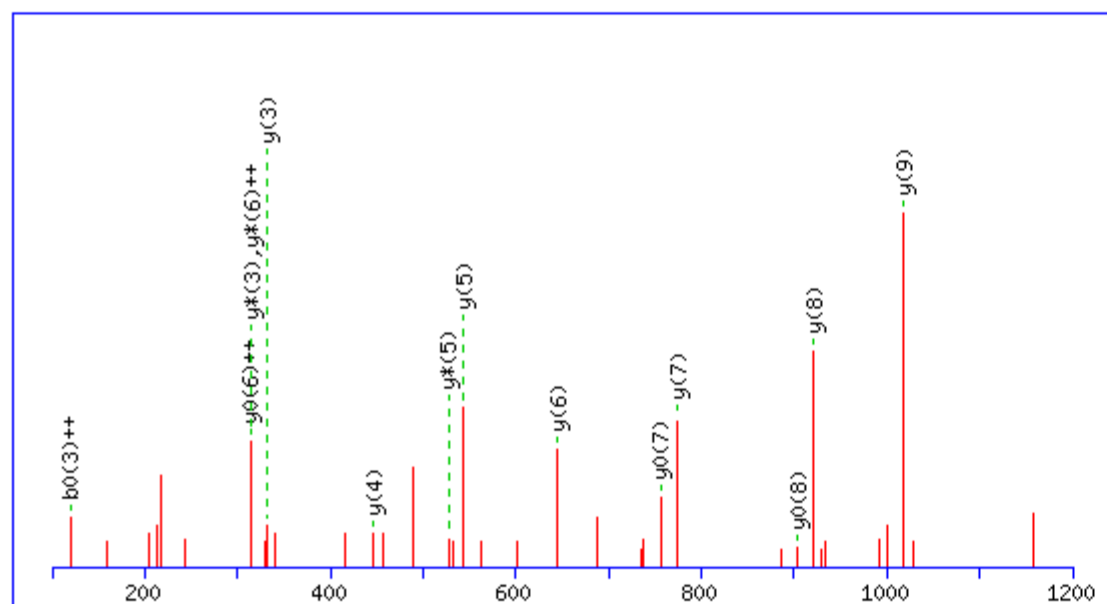

Monoisotopic mass of neutral peptide  $M_r(\text{calc})$ : 1175.545883

Fixed modifications: Propionamide (C) (apply to specified residues or termini only)

Ions Score: 53 Expect: 4.3e-005

Matches : 14/96 fragment ions using 20 most intense peaks ([help](#))

| #  | b           | b <sup>++</sup> | b <sup>*</sup> | b <sup>*++</sup> | b <sup>0</sup> | b <sup>0++</sup> | Seq. | y           | y <sup>++</sup> | y <sup>*</sup> | y <sup>*++</sup> | y <sup>0</sup> | y <sup>0++</sup> | #  |
|----|-------------|-----------------|----------------|------------------|----------------|------------------|------|-------------|-----------------|----------------|------------------|----------------|------------------|----|
| 1  | 58.028740   | 29.518008       |                |                  |                |                  | G    |             |                 |                |                  |                |                  | 11 |
| 2  | 159.076419  | 80.041847       |                |                  | 141.065854     | 71.036565        | T    | 1119.531682 | 560.269479      | 1102.505133    | 551.756205       | 1101.521117    | 551.264197       | 10 |
| 3  | 256.129183  | 128.568230      |                |                  | 238.118618     | 119.562947       | P    | 1018.484003 | 509.745640      | 1001.457454    | 501.232365       | 1000.473438    | 500.740357       | 9  |
| 4  | 403.197597  | 202.102436      |                |                  | 385.187032     | 193.097154       | F    | 921.431239  | 461.219258      | 904.404690     | 452.705983       | 903.420674     | 452.213975       | 8  |
| 5  | 532.240190  | 266.623733      |                |                  | 514.229625     | 257.618450       | E    | 774.362825  | 387.685050      | 757.336276     | 379.171776       | 756.352260     | 378.679768       | 7  |
| 6  | 633.287869  | 317.147573      |                |                  | 615.277304     | 308.142290       | T    | 645.320232  | 323.163754      | 628.293683     | 314.650480       | 627.309667     | 314.158472       | 6  |
| 7  | 730.340633  | 365.673955      |                |                  | 712.330068     | 356.668672       | P    | 544.272553  | 272.639915      | 527.246004     | 264.126640       | 526.261988     | 263.634632       | 5  |
| 8  | 845.367576  | 423.187426      |                |                  | 827.357011     | 414.182144       | D    | 447.219789  | 224.113532      | 430.193240     | 215.600258       | 429.209224     | 215.108250       | 4  |
| 9  | 973.426154  | 487.216715      | 956.399605     | 478.703441       | 955.415589     | 478.211433       | Q    | 332.192846  | 166.600061      | 315.166297     | 158.086786       |                |                  | 3  |
| 10 | 1030.447618 | 515.727447      | 1013.421069    | 507.214172       | 1012.437053    | 506.722164       | G    | 204.134268  | 102.570772      | 187.107719     | 94.057497        |                |                  | 2  |
| 11 |             |                 |                |                  |                |                  | K    | 147.112804  | 74.060040       | 130.086255     | 65.546765        |                |                  | 1  |

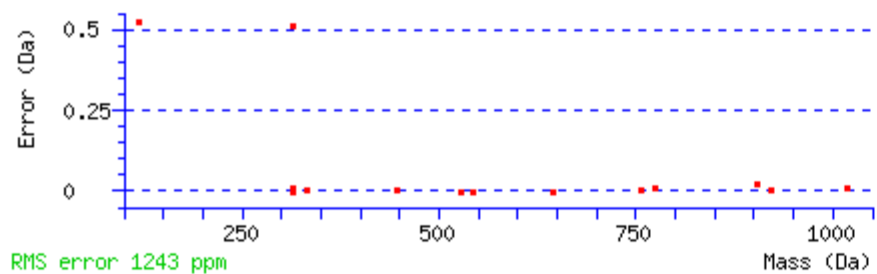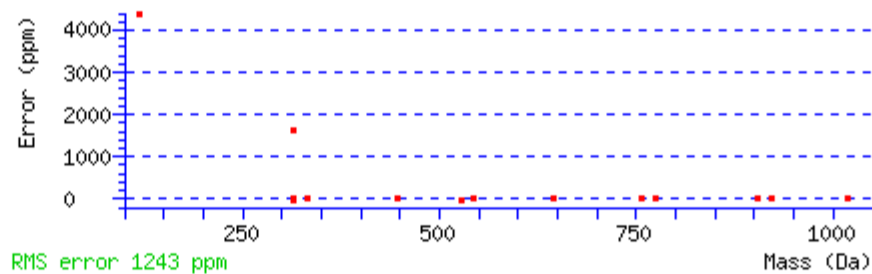

NCBI BLAST search of [GTPFETPDQ GK](#)

(Parameters: blastp, nr protein database, expect=20000, no filter, PAM30)

Other BLAST [web gateways](#)

### All matches to this query

| Score | $M_r(\text{calc})$ : | Delta     | Sequence                     |
|-------|----------------------|-----------|------------------------------|
| 53.2  | 1175.545883          | 0.000345  | <a href="#">GTPFETPDQ GK</a> |
| 6.4   | 1175.543365          | 0.002863  | <a href="#">AAPFSMFSFR</a>   |
| 2.4   | 1175.549225          | -0.002997 | <a href="#">TMEGPLPSNAK</a>  |

**Peptide View**

MS/MS Fragmentation of **DSDGQVFGALASEPLK**  
 Found in **OXR1\_HUMAN**, Oxidation resistance protein 1 OS=Homo sapiens GN=OXR1 PE=1 SV=2

Match to Query 51525: 1632.798048 from(817.406300,2+) rtinseconds(3050) index(41386)  
 Title: Locus:1.1.1.2501.41  
 Data file 2011-11-10 - TFD - EP 4-1.mgf

Click mouse within plot area to zoom in by factor of two about that point  
 Or, Plot from  to  Da   
 Label all possible matches  Label matches used for scoring

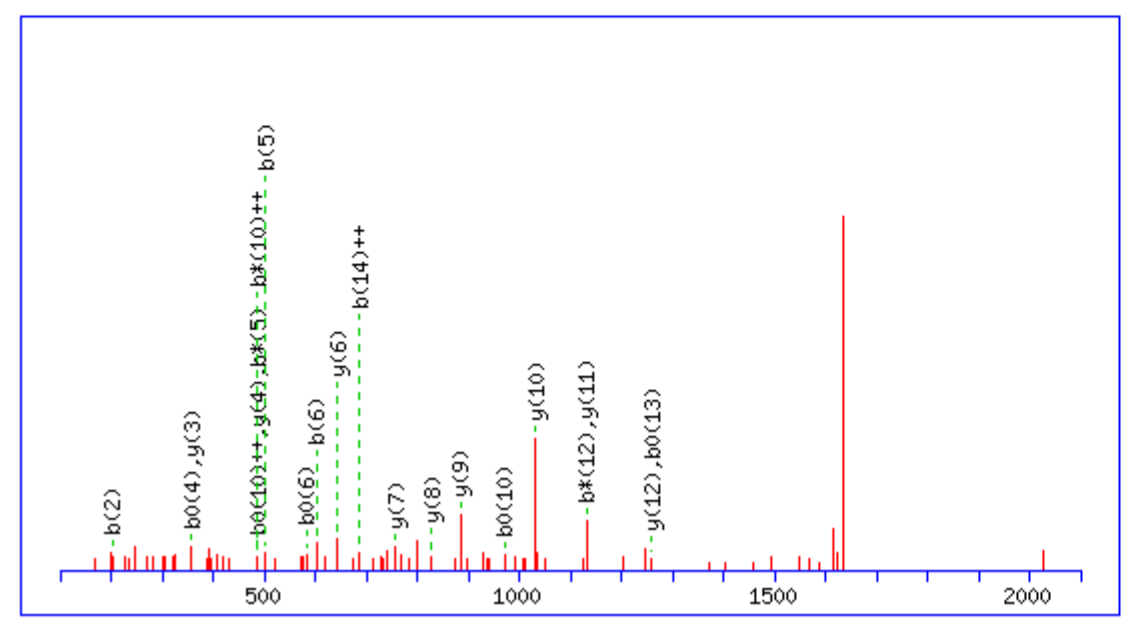

Monoisotopic mass of neutral peptide Mr(calcd): 1632.799515  
 Fixed modifications: Propionamide (C) (apply to specified residues or termini only)  
 Ions Score: 41 Expect: 0.0013  
 Matches : 21/166 fragment ions using 42 most intense peaks ([help](#))

| #  | b                 | b <sup>++</sup>   | b <sup>+</sup>     | b <sup>*++</sup>  | b <sup>0</sup>     | b <sup>0++</sup>  | Seq. | y                  | y <sup>++</sup> | y <sup>+</sup> | y <sup>*++</sup> | y <sup>0</sup> | y <sup>0++</sup> | #  |
|----|-------------------|-------------------|--------------------|-------------------|--------------------|-------------------|------|--------------------|-----------------|----------------|------------------|----------------|------------------|----|
| 1  | 116.034219        | 58.520748         |                    |                   | 98.023654          | 49.515465         | D    |                    |                 |                |                  |                |                  | 16 |
| 2  | <b>203.066247</b> | 102.036761        |                    |                   | 185.055682         | 93.031479         | S    | 1518.779850        | 759.893563      | 1501.753301    | 751.380289       | 1500.769285    | 750.888281       | 15 |
| 3  | 318.093190        | 159.550233        |                    |                   | 300.082625         | 150.544951        | D    | 1431.747822        | 716.377549      | 1414.721273    | 707.864275       | 1413.737257    | 707.372267       | 14 |
| 4  | 375.114654        | 188.060965        |                    |                   | <b>357.104089</b>  | 179.055682        | G    | 1316.720879        | 658.864078      | 1299.694330    | 650.350803       | 1298.710314    | 649.858795       | 13 |
| 5  | <b>503.173232</b> | 252.090254        | <b>486.146683</b>  | 243.576979        | 485.162667         | 243.084971        | Q    | <b>1259.699415</b> | 630.353346      | 1242.672866    | 621.840071       | 1241.688850    | 621.348063       | 12 |
| 6  | <b>602.241646</b> | 301.624461        | 585.215097         | 293.111187        | <b>584.231081</b>  | 292.619179        | V    | <b>1131.640837</b> | 566.324057      | 1114.614288    | 557.810782       | 1113.630272    | 557.318774       | 11 |
| 7  | 749.310060        | 375.158668        | 732.283511         | 366.645394        | 731.299495         | 366.153386        | F    | <b>1032.572423</b> | 516.789850      | 1015.545874    | 508.276575       | 1014.561858    | 507.784567       | 10 |
| 8  | 806.331524        | 403.669400        | 789.304975         | 395.156126        | 788.320959         | 394.664118        | G    | <b>885.504009</b>  | 443.255643      | 868.477460     | 434.742368       | 867.493444     | 434.250360       | 9  |
| 9  | 877.368638        | 439.187957        | 860.342089         | 430.674683        | 859.358073         | 430.182675        | A    | <b>828.482545</b>  | 414.744911      | 811.455996     | 406.231636       | 810.471980     | 405.739628       | 8  |
| 10 | 990.452702        | 495.729989        | 973.426153         | <b>487.216715</b> | <b>972.442137</b>  | <b>486.724707</b> | L    | <b>757.445431</b>  | 379.226354      | 740.418882     | 370.713079       | 739.434866     | 370.221071       | 7  |
| 11 | 1061.489816       | 531.248546        | 1044.463267        | 522.735272        | 1043.479251        | 522.243264        | A    | <b>644.361367</b>  | 322.684322      | 627.334818     | 314.171047       | 626.350802     | 313.679039       | 6  |
| 12 | 1148.521844       | 574.764560        | <b>1131.495295</b> | 566.251286        | 1130.511279        | 565.759278        | S    | 573.324253         | 287.165765      | 556.297704     | 278.652490       | 555.313688     | 278.160482       | 5  |
| 13 | 1277.564437       | 639.285857        | 1260.537888        | 630.772582        | <b>1259.553872</b> | 630.280574        | E    | <b>486.292225</b>  | 243.649751      | 469.265676     | 235.136476       | 468.281660     | 234.644468       | 4  |
| 14 | 1374.617201       | <b>687.812239</b> | 1357.590652        | 679.298964        | 1356.606636        | 678.806956        | P    | <b>357.249632</b>  | 179.128454      | 340.223083     | 170.615179       |                |                  | 3  |
| 15 | 1487.701265       | 744.354271        | 1470.674716        | 735.840996        | 1469.690700        | 735.348988        | L    | 260.196868         | 130.602072      | 243.170319     | 122.088797       |                |                  | 2  |
| 16 |                   |                   |                    |                   |                    |                   | K    | 147.112804         | 74.060040       | 130.086255     | 65.546765        |                |                  | 1  |

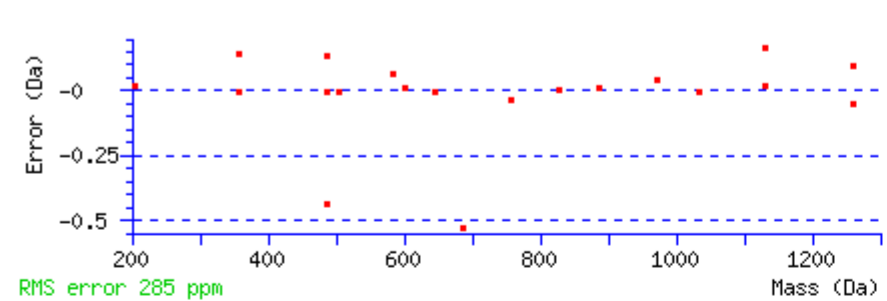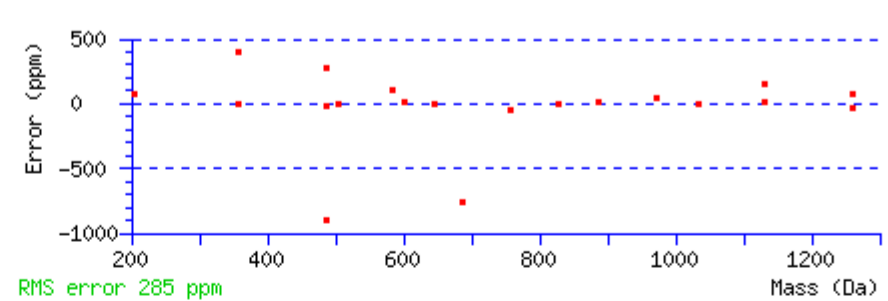

NCBI BLAST search of [DSDGQVFGALASEPLK](#)  
 (Parameters: blastp, nr protein database, expect=20000, no filter, PAM30)  
 Other BLAST [web gateways](#)

**All matches to this query**

| Score | Mr(calcd):  | Delta     | Sequence                         |
|-------|-------------|-----------|----------------------------------|
| 40.8  | 1632.799515 | -0.001467 | <a href="#">DSDGQVFGALASEPLK</a> |
| 4.0   | 1632.814148 | -0.016100 | <a href="#">VTADVTSVMGNPVTR</a>  |

# MATRIX SCIENCE Mascot Search Results

## Peptide View

MS/MS Fragmentation of **GATVLPANTPGNVGSGK**  
 Found in **OSBP1\_HUMAN**, Oxysterol-binding protein 1 OS=Homo sapiens GN=OSBP PE=1 SV=1

Match to Query 46458: 1538.808128 from(770.411340,2+) rtinseconds(1770) index(14798)  
 Title: Locus:1.1.1.2318.50  
 Data file 2011-11-12 - TFD - EP 5-2.mgf

Click mouse within plot area to zoom in by factor of two about that point  
 Or, Plot from  to  Da   
 Label all possible matches  Label matches used for scoring

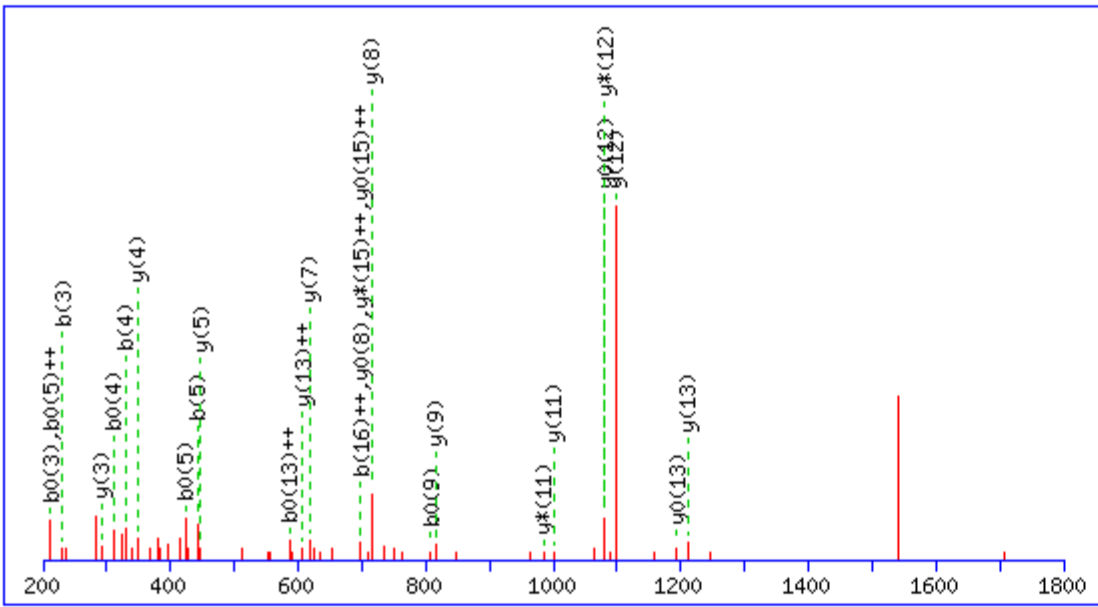

Monoisotopic mass of neutral peptide Mr(calc): 1538.805283  
 Fixed modifications: Propionamide (C) (apply to specified residues or termini only)  
 Ions Score: 48 Expect: 0.00015  
 Matches : 27/170 fragment ions using 44 most intense peaks [\(help\)](#)

| #  | b                 | b <sup>++</sup>   | b <sup>*</sup> | b <sup>***</sup> | b <sup>0</sup>    | b <sup>0++</sup>  | Seq.     | y                  | y <sup>++</sup>   | y <sup>*</sup>     | y <sup>***</sup>  | y <sup>0</sup>     | y <sup>0++</sup>  | #  |
|----|-------------------|-------------------|----------------|------------------|-------------------|-------------------|----------|--------------------|-------------------|--------------------|-------------------|--------------------|-------------------|----|
| 1  | 58.028740         | 29.518008         |                |                  |                   |                   | <b>G</b> |                    |                   |                    |                   |                    |                   | 17 |
| 2  | 129.065854        | 65.036565         |                |                  |                   |                   | <b>A</b> | 1482.791084        | 741.899180        | 1465.764535        | 733.385906        | 1464.780519        | 732.893898        | 16 |
| 3  | <b>230.113533</b> | 115.560405        |                |                  | <b>212.102968</b> | 106.555122        | <b>T</b> | 1411.753970        | 706.380623        | 1394.727421        | <b>697.867349</b> | 1393.743405        | <b>697.375340</b> | 15 |
| 4  | <b>329.181947</b> | 165.094612        |                |                  | <b>311.171382</b> | 156.089329        | <b>V</b> | 1310.706291        | 655.856784        | 1293.679742        | 647.343509        | 1292.695726        | 646.851501        | 14 |
| 5  | <b>442.266011</b> | 221.636644        |                |                  | <b>424.255446</b> | <b>212.631361</b> | <b>L</b> | <b>1211.637877</b> | <b>606.322577</b> | 1194.611328        | 597.809302        | <b>1193.627312</b> | 597.317294        | 13 |
| 6  | 539.318775        | 270.163026        |                |                  | 521.308210        | 261.157743        | <b>P</b> | <b>1098.553813</b> | 549.780545        | <b>1081.527264</b> | 541.267270        | <b>1080.543248</b> | 540.775262        | 12 |
| 7  | 610.355889        | 305.681583        |                |                  | 592.345324        | 296.676300        | <b>A</b> | <b>1001.501049</b> | 501.254163        | <b>984.474500</b>  | 492.740888        | 983.490484         | 492.248880        | 11 |
| 8  | 724.398816        | 362.703046        | 707.372267     | 354.189772       | 706.388251        | 353.697764        | <b>N</b> | 930.463935         | 465.735606        | 913.437386         | 457.222331        | 912.453370         | 456.730323        | 10 |
| 9  | 825.446495        | 413.226886        | 808.419946     | 404.713611       | <b>807.435930</b> | 404.221603        | <b>T</b> | <b>816.421008</b>  | 408.714142        | 799.394459         | 400.200868        | 798.410443         | 399.708860        | 9  |
| 10 | 922.499259        | 461.753268        | 905.472710     | 453.239993       | 904.488694        | 452.747985        | <b>P</b> | <b>715.373329</b>  | 358.190303        | 698.346780         | 349.677028        | <b>697.362764</b>  | 349.185020        | 8  |
| 11 | 979.520723        | 490.264000        | 962.494174     | 481.750725       | 961.510158        | 481.258717        | <b>G</b> | <b>618.320565</b>  | 309.663921        | 601.294016         | 301.150646        | 600.310000         | 300.658638        | 7  |
| 12 | 1093.563650       | 547.285463        | 1076.537101    | 538.772189       | 1075.553085       | 538.280181        | <b>N</b> | 561.299101         | 281.153189        | 544.272552         | 272.639914        | 543.288536         | 272.147906        | 6  |
| 13 | 1192.632064       | 596.819670        | 1175.605515    | 588.306396       | 1174.621499       | <b>587.814388</b> | <b>V</b> | <b>447.256174</b>  | 224.131725        | 430.229625         | 215.618450        | 429.245609         | 215.126443        | 5  |
| 14 | 1249.653528       | 625.330402        | 1232.626979    | 616.817128       | 1231.642963       | 616.325120        | <b>G</b> | <b>348.187760</b>  | 174.597518        | 331.161211         | 166.084243        | 330.177195         | 165.592235        | 4  |
| 15 | 1336.685556       | 668.846416        | 1319.659007    | 660.333142       | 1318.674991       | 659.841134        | <b>S</b> | <b>291.166296</b>  | 146.086786        | 274.139747         | 137.573512        | 273.155731         | 137.081504        | 3  |
| 16 | 1393.707020       | <b>697.357148</b> | 1376.680471    | 688.843874       | 1375.696455       | 688.351866        | <b>G</b> | 204.134268         | 102.570772        | 187.107719         | 94.057497         |                    |                   | 2  |
| 17 |                   |                   |                |                  |                   |                   | <b>K</b> | 147.112804         | 74.060040         | 130.086255         | 65.546765         |                    |                   | 1  |

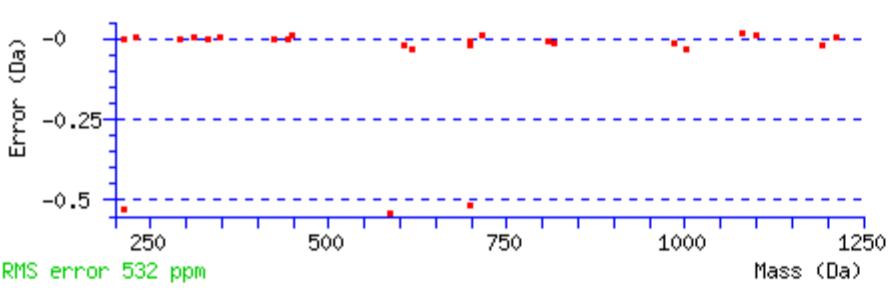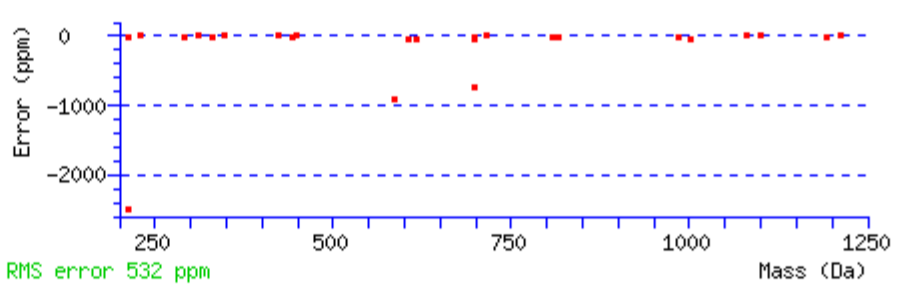

NCBI BLAST search of [GATVLPANTPGNVGSGK](#)  
 (Parameters: blastp, nr protein database, expect=20000, no filter, PAM30)  
 Other BLAST [web gateways](#)

### All matches to this query

| Score | Mr(calc):   | Delta    | Sequence                          |
|-------|-------------|----------|-----------------------------------|
| 48.5  | 1538.805283 | 0.002845 | <a href="#">GATVLPANTPGNVGSGK</a> |
| 11.1  | 1538.795349 | 0.012779 | <a href="#">EQALRHPQLFER</a>      |
| 3.4   | 1538.805237 | 0.002891 | <a href="#">EAQPEAGAKKPLR</a>     |



# MASCOT SCIENCE Mascot Search Results

## Peptide View

MS/MS Fragmentation of **IDLPEAR**

Found in **PAX6\_HUMAN**, Paired box protein Pax-6 OS=Homo sapiens GN=PAX6 PE=1 SV=2

Match to Query 18556: 812.442608 from(407.228580,2+) rtinseconds(1773) index(507591)

Title: Locus:1.1.1.1006.4

Data file C:\Program Files (x86)\Matrix Science\Mascot Daemon\mgf3 TFD - Epitel - R2\mascot\_daemon\_merge.mgf

Click mouse within plot area to zoom in by factor of two about that point

Or, Plot from  to  Da

Label all possible matches  Label matches used for scoring

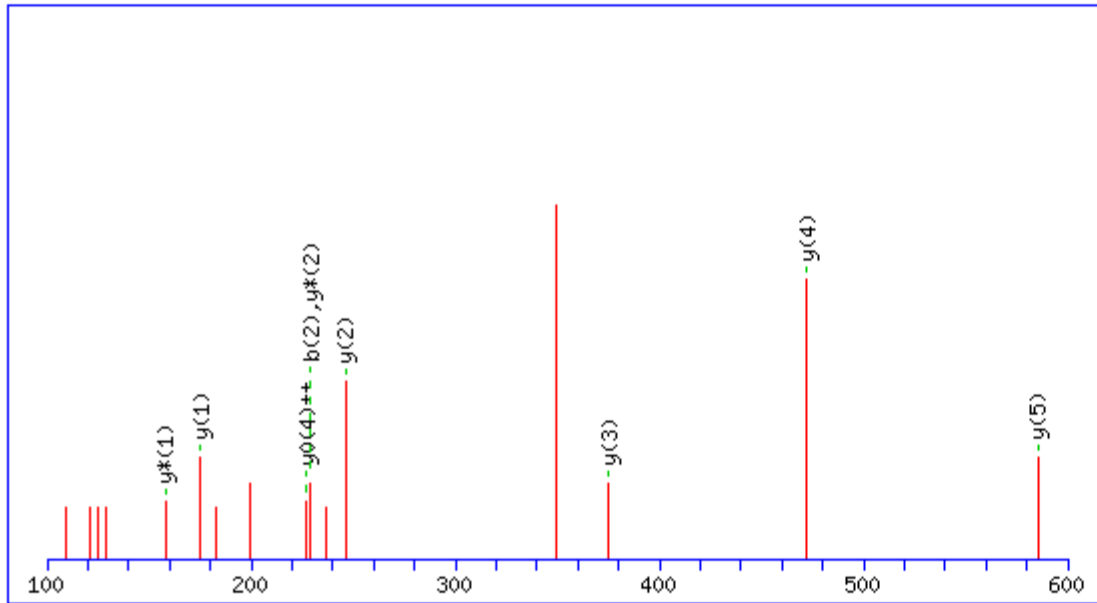

Monoisotopic mass of neutral peptide Mr(calc): 812.439194

Fixed modifications: Carbamidomethyl (C) (apply to specified residues or termini only)

Ions Score: 45 Expect: 0.00084

Matches : 9/54 fragment ions using 10 most intense peaks [\(help\)](#)

| # | b                 | b <sup>++</sup> | b <sup>0</sup> | b <sup>0++</sup> | Seq. | y                 | y <sup>++</sup> | y <sup>*</sup>    | y <sup>*++</sup> | y <sup>0</sup> | y <sup>0++</sup>  | # |
|---|-------------------|-----------------|----------------|------------------|------|-------------------|-----------------|-------------------|------------------|----------------|-------------------|---|
| 1 | 114.091340        | 57.549308       |                |                  | I    |                   |                 |                   |                  |                |                   | 7 |
| 2 | <b>229.118283</b> | 115.062779      | 211.107718     | 106.057497       | D    | 700.362430        | 350.684853      | 683.335881        | 342.171579       | 682.351865     | 341.679571        | 6 |
| 3 | 342.202347        | 171.604811      | 324.191782     | 162.599529       | L    | <b>585.335487</b> | 293.171382      | 568.308938        | 284.658107       | 567.324922     | 284.166099        | 5 |
| 4 | 439.255111        | 220.131193      | 421.244546     | 211.125911       | P    | <b>472.251423</b> | 236.629349      | 455.224874        | 228.116075       | 454.240858     | <b>227.624067</b> | 4 |
| 5 | 568.297704        | 284.652490      | 550.287139     | 275.647208       | E    | <b>375.198659</b> | 188.102967      | 358.172110        | 179.589693       | 357.188094     | 179.097685        | 3 |
| 6 | 639.334818        | 320.171047      | 621.324253     | 311.165765       | A    | <b>246.156066</b> | 123.581671      | <b>229.129517</b> | 115.068396       |                |                   | 2 |
| 7 |                   |                 |                |                  | R    | <b>175.118952</b> | 88.063114       | <b>158.092403</b> | 79.549839        |                |                   | 1 |

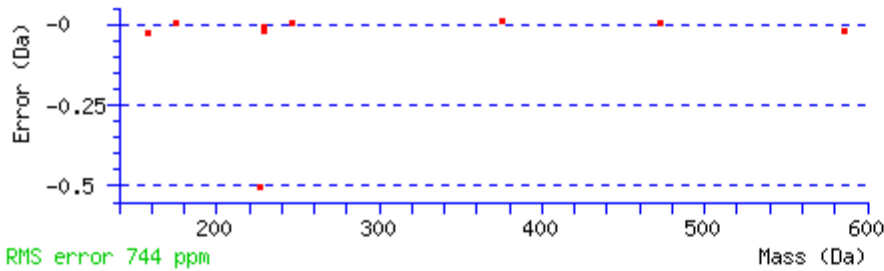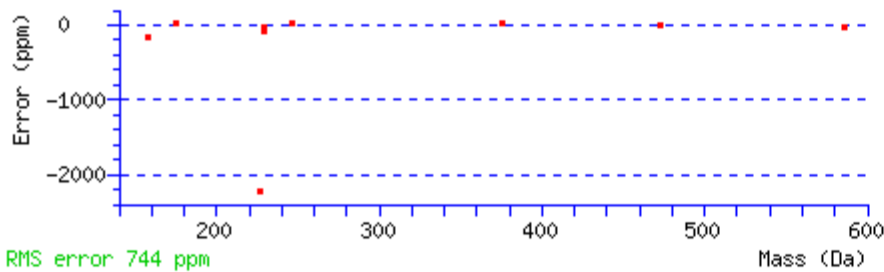

NCBI BLAST search of [IDLPEAR](#)

(Parameters: blastp, nr protein database, expect=20000, no filter, PAM30)

Other BLAST [web gateways](#)

## All matches to this query

| Score | Mr(calc):  | Delta     | Sequence                  |
|-------|------------|-----------|---------------------------|
| 44.9  | 812.439194 | 0.003414  | <a href="#">IDLPEAR</a>   |
| 18.1  | 812.450424 | -0.007816 | <a href="#">NLNLPAR</a>   |
| 17.5  | 812.439209 | 0.003399  | <a href="#">LDPSPLR</a>   |
| 9.1   | 812.440536 | 0.002072  | <a href="#">ARPGWAR</a>   |
| 5.5   | 812.450439 | -0.007831 | <a href="#">TLQQPAR</a>   |
| 3.5   | 812.439194 | 0.003414  | <a href="#">DLALEPR</a>   |
| 3.5   | 812.439209 | 0.003399  | <a href="#">DLAPLPR</a>   |
| 1.8   | 812.439178 | 0.003430  | <a href="#">ENLAAPAK</a>  |
| 1.0   | 812.450455 | -0.007847 | <a href="#">GGSPVLGAR</a> |
| 0.9   | 812.439194 | 0.003414  | <a href="#">EPVELAR</a>   |

# MASCOT Search Results

## Peptide View

MS/MS Fragmentation of **VIQATGGGAYK**

Found in **PANK4\_HUMAN**, Pantothenate kinase 4 OS=Homo sapiens GN=PANK4 PE=1 SV=1

Match to Query 347064: 1063.564088 from(532.789320,2+) rtinseconds(1105) index(330616)

Title: Locus:1.1.1.754.25

Data file C:\Program Files (x86)\Matrix Science\Mascot Daemon\mgf3 TFD - Epitel - R2\mascot\_daemon\_merge.mgf

Click mouse within plot area to zoom in by factor of two about that point

Or, Plot from  to  Da

Label all possible matches  Label matches used for scoring

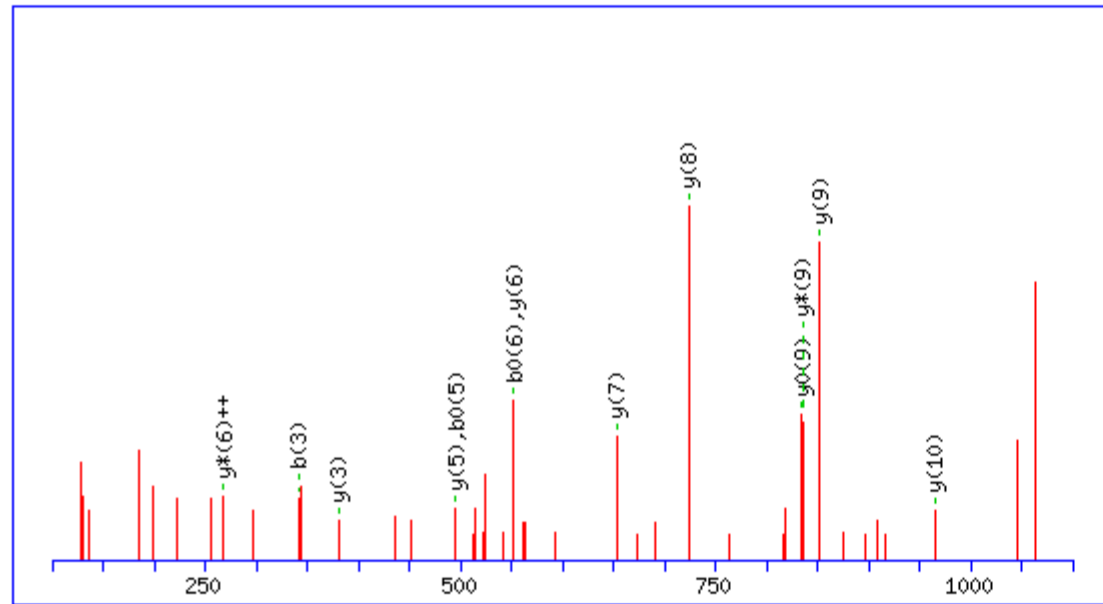

Monoisotopic mass of neutral peptide  $M_r(\text{calc})$ : 1063.566208

Fixed modifications: Carbamidomethyl (C) (apply to specified residues or termini only)

Ions Score: 38 Expect: 0.0023

Matches : 13/96 fragment ions using 27 most intense peaks [\(help\)](#)

| #  | b          | b <sup>++</sup> | b <sup>*</sup> | b <sup>*++</sup> | b <sup>0</sup> | b <sup>0++</sup> | Seq. | y          | y <sup>++</sup> | y <sup>*</sup> | y <sup>*++</sup> | y <sup>0</sup> | y <sup>0++</sup> | #  |
|----|------------|-----------------|----------------|------------------|----------------|------------------|------|------------|-----------------|----------------|------------------|----------------|------------------|----|
| 1  | 100.075690 | 50.541483       |                |                  |                |                  | V    |            |                 |                |                  |                |                  | 11 |
| 2  | 213.159754 | 107.083515      |                |                  |                |                  | I    | 965.505074 | 483.256175      | 948.478525     | 474.742901       | 947.494509     | 474.250893       | 10 |
| 3  | 341.218332 | 171.112804      | 324.191783     | 162.599529       |                |                  | Q    | 852.421010 | 426.714143      | 835.394461     | 418.200869       | 834.410445     | 417.708861       | 9  |
| 4  | 412.255446 | 206.631361      | 395.228897     | 198.118086       |                |                  | A    | 724.362432 | 362.684854      | 707.335883     | 354.171580       | 706.351867     | 353.679572       | 8  |
| 5  | 513.303125 | 257.155201      | 496.276576     | 248.641926       | 495.292560     | 248.149918       | T    | 653.325318 | 327.166297      | 636.298769     | 318.653023       | 635.314753     | 318.161015       | 7  |
| 6  | 570.324589 | 285.665933      | 553.298040     | 277.152658       | 552.314024     | 276.660650       | G    | 552.277639 | 276.642458      | 535.251090     | 268.129183       |                |                  | 6  |
| 7  | 627.346053 | 314.176665      | 610.319504     | 305.663390       | 609.335488     | 305.171382       | G    | 495.256175 | 248.131726      | 478.229626     | 239.618451       |                |                  | 5  |
| 8  | 684.367517 | 342.687397      | 667.340968     | 334.174122       | 666.356952     | 333.682114       | G    | 438.234711 | 219.620994      | 421.208162     | 211.107719       |                |                  | 4  |
| 9  | 755.404631 | 378.205954      | 738.378082     | 369.692679       | 737.394066     | 369.200671       | A    | 381.213247 | 191.110262      | 364.186698     | 182.596987       |                |                  | 3  |
| 10 | 918.467960 | 459.737618      | 901.441411     | 451.224344       | 900.457395     | 450.732336       | Y    | 310.176133 | 155.591705      | 293.149584     | 147.078430       |                |                  | 2  |
| 11 |            |                 |                |                  |                |                  | K    | 147.112804 | 74.060040       | 130.086255     | 65.546765        |                |                  | 1  |

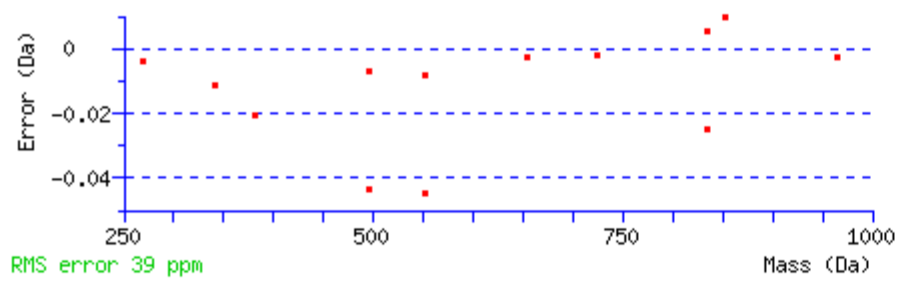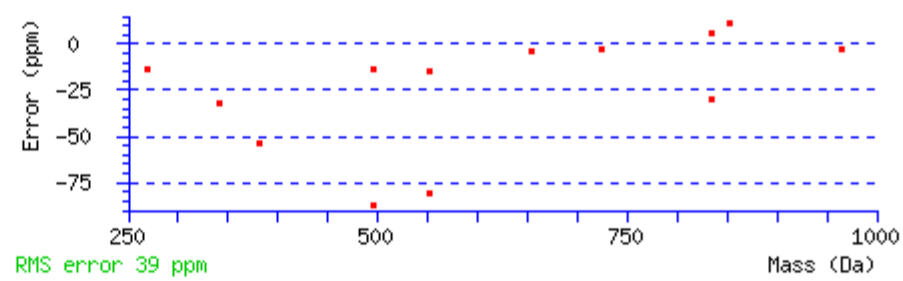

NCBI BLAST search of **VIQATGGGAYK**

(Parameters: blastp, nr protein database, expect=20000, no filter, PAM30)

Other BLAST [web gateways](#)

All matches to this query

| Score | $M_r(\text{calc})$ : | Delta     | Sequence                    |
|-------|----------------------|-----------|-----------------------------|
| 37.5  | 1063.566208          | -0.002120 | <a href="#">VIQATGGGAYK</a> |
| 10.0  | 1063.566177          | -0.002089 | <a href="#">VLQEEYRK</a>    |

Mascot: <http://www.matrixscience.com/>

# MATRIX SCIENCE Mascot Search Results

## Peptide View

MS/MS Fragmentation of **LPLVVEDFVK**

Found in **PDDC1\_HUMAN**, Parkinson disease 7 domain-containing protein 1 OS=Homo sapiens GN=PDDC1 PE=1 SV=1

Match to Query 25780: 1157.670008 from(579.842280,2+) rtinseconds(3490) index(48234)

Title: Locus:1.1.1.2745.14

Data file 2011-11-13 - TFD - EP 7-5.mgf

Click mouse within plot area to zoom in by factor of two about that point

Or, Plot from  to  Da

Label all possible matches  Label matches used for scoring

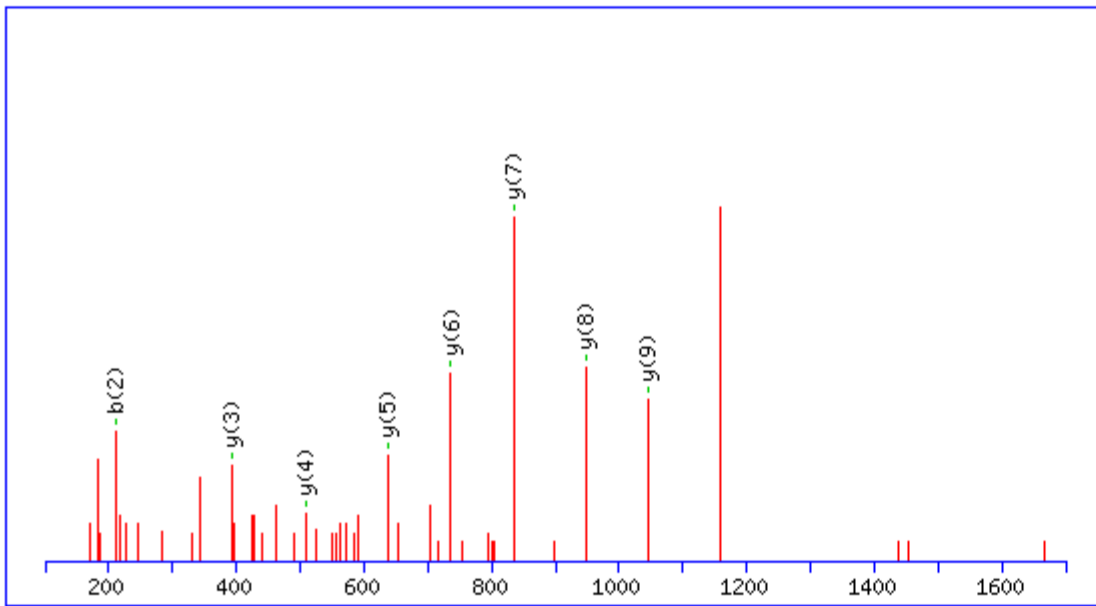

Monoisotopic mass of neutral peptide Mr(calc): 1157.669617

Fixed modifications: Propionamide (C) (apply to specified residues or termini only)

Ions Score: 64 Expect: 2.8e-006

Matches : 8/74 fragment ions using 9 most intense peaks ([help](#))

| #  | b           | b <sup>++</sup> | b <sup>0</sup> | b <sup>0++</sup> | Seq. | y           | y <sup>++</sup> | y <sup>*</sup> | y <sup>*++</sup> | y <sup>0</sup> | y <sup>0++</sup> | #  |
|----|-------------|-----------------|----------------|------------------|------|-------------|-----------------|----------------|------------------|----------------|------------------|----|
| 1  | 114.091340  | 57.549308       |                |                  | L    |             |                 |                |                  |                |                  | 10 |
| 2  | 211.144104  | 106.075690      |                |                  | P    | 1045.592824 | 523.300050      | 1028.566275    | 514.786776       | 1027.582259    | 514.294768       | 9  |
| 3  | 324.228168  | 162.617722      |                |                  | L    | 948.540060  | 474.773668      | 931.513511     | 466.260394       | 930.529495     | 465.768386       | 8  |
| 4  | 423.296582  | 212.151929      |                |                  | V    | 835.455996  | 418.231636      | 818.429447     | 409.718361       | 817.445431     | 409.226353       | 7  |
| 5  | 522.364996  | 261.686136      |                |                  | V    | 736.387582  | 368.697429      | 719.361033     | 360.184154       | 718.377017     | 359.692146       | 6  |
| 6  | 651.407589  | 326.207433      | 633.397024     | 317.202150       | E    | 637.319168  | 319.163222      | 620.292619     | 310.649948       | 619.308603     | 310.157940       | 5  |
| 7  | 766.434532  | 383.720904      | 748.423967     | 374.715622       | D    | 508.276575  | 254.641925      | 491.250026     | 246.128651       | 490.266010     | 245.636643       | 4  |
| 8  | 913.502946  | 457.255111      | 895.492381     | 448.249828       | F    | 393.249632  | 197.128454      | 376.223083     | 188.615179       |                |                  | 3  |
| 9  | 1012.571360 | 506.789318      | 994.560795     | 497.784035       | V    | 246.181218  | 123.594247      | 229.154669     | 115.080972       |                |                  | 2  |
| 10 |             |                 |                |                  | K    | 147.112804  | 74.060040       | 130.086255     | 65.546765        |                |                  | 1  |

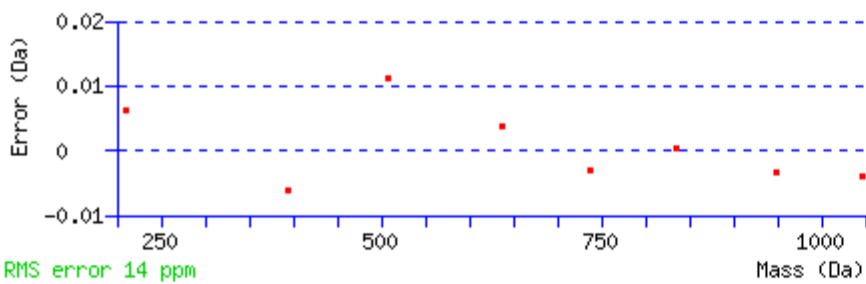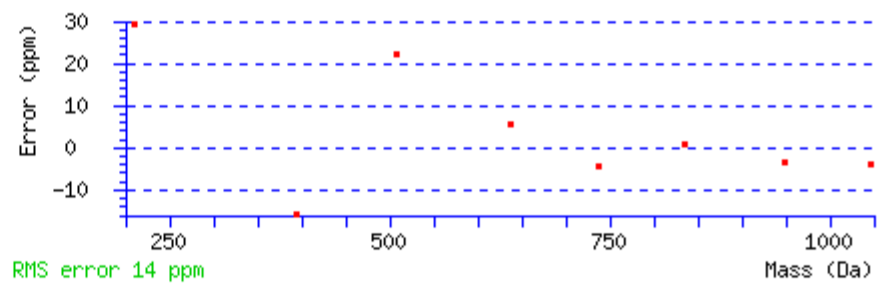

NCBI BLAST search of [LPLVVEDFVK](#)

(Parameters: blastp, nr protein database, expect=20000, no filter, PAM30)

Other BLAST [web gateways](#)

## All matches to this query

| Score | Mr(calc):   | Delta    | Sequence                   |
|-------|-------------|----------|----------------------------|
| 64.1  | 1157.669617 | 0.000391 | <a href="#">LPLVVEDFVK</a> |

Mascot: <http://www.matrixscience.com/>

**Peptide View**

MS/MS Fragmentation of **TNLADDIRER**

Found in **PTHD3\_HUMAN**, Patched domain-containing protein 3 OS=Homo sapiens GN=PTCHD3 PE=1 SV=2

Match to Query 18114: 1201.601388 from(601.807970,2+) rtinseconds(1930) index(8958)

Title: Locus:1.1.1.2458.22

Data file 2011-11-14 - TFD - EP 8-8.mgf

Click mouse within plot area to zoom in by factor of two about that point

Or, Plot from  to  Da

Label all possible matches  Label matches used for scoring

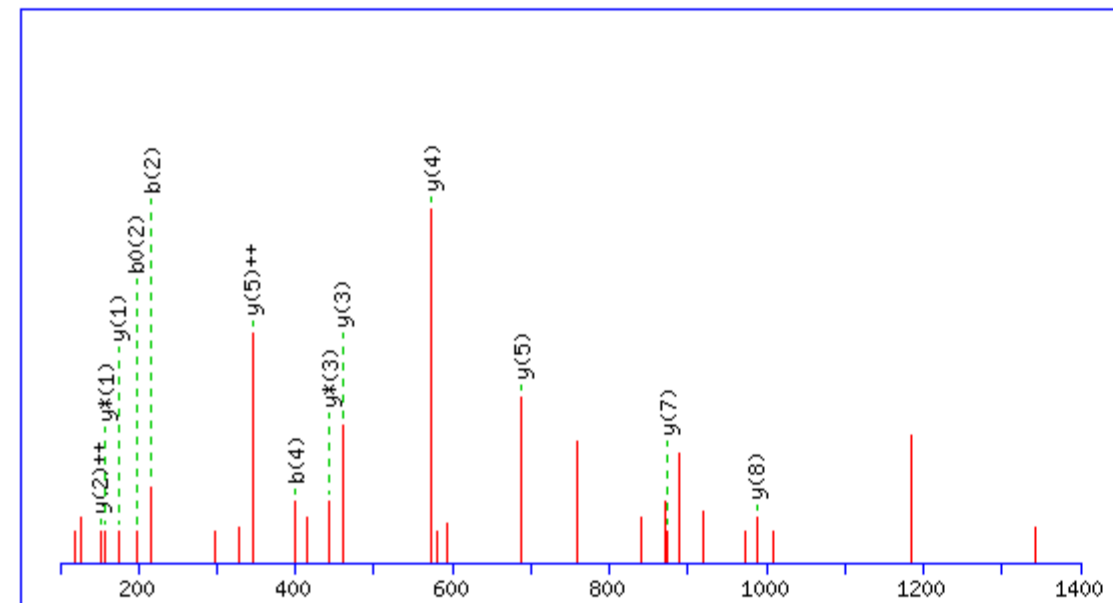

Monoisotopic mass of neutral peptide Mr(calc): 1201.605087

Fixed modifications: Propionamide (C) (apply to specified residues or termini only)

Ions Score: 34 Expect: 0.006

Matches : 13/104 fragment ions using 29 most intense peaks [\(help\)](#)

| #  | b                 | b <sup>++</sup> | b <sup>*</sup> | b <sup>***</sup> | b <sup>0</sup>    | b <sup>0++</sup> | Seq. | y                 | y <sup>++</sup>   | y <sup>*</sup>    | y <sup>***</sup> | y <sup>0</sup> | y <sup>0++</sup> | #  |
|----|-------------------|-----------------|----------------|------------------|-------------------|------------------|------|-------------------|-------------------|-------------------|------------------|----------------|------------------|----|
| 1  | 102.054955        | 51.531116       |                |                  | 84.044390         | 42.525833        | T    |                   |                   |                   |                  |                |                  | 10 |
| 2  | <b>216.097882</b> | 108.552579      | 199.071333     | 100.039305       | <b>198.087317</b> | 99.547296        | N    | 1101.564711       | 551.285994        | 1084.538162       | 542.772719       | 1083.554146    | 542.280711       | 9  |
| 3  | 329.181946        | 165.094611      | 312.155397     | 156.581336       | 311.171381        | 156.089328       | L    | <b>987.521784</b> | 494.264530        | 970.495235        | 485.751256       | 969.511219     | 485.259248       | 8  |
| 4  | <b>400.219060</b> | 200.613168      | 383.192511     | 192.099893       | 382.208495        | 191.607885       | A    | <b>874.437720</b> | 437.722498        | 857.411171        | 429.209224       | 856.427155     | 428.717216       | 7  |
| 5  | 515.246003        | 258.126640      | 498.219454     | 249.613365       | 497.235438        | 249.121357       | D    | 803.400606        | 402.203941        | 786.374057        | 393.690667       | 785.390041     | 393.198659       | 6  |
| 6  | 630.272946        | 315.640111      | 613.246397     | 307.126836       | 612.262381        | 306.634828       | D    | <b>688.373663</b> | <b>344.690470</b> | 671.347114        | 336.177195       | 670.363098     | 335.685187       | 5  |
| 7  | 743.357010        | 372.182143      | 726.330461     | 363.668868       | 725.346445        | 363.176860       | I    | <b>573.346720</b> | 287.176998        | 556.320171        | 278.663724       | 555.336155     | 278.171716       | 4  |
| 8  | 899.458121        | 450.232698      | 882.431572     | 441.719424       | 881.447556        | 441.227416       | R    | <b>460.262656</b> | 230.634966        | <b>443.236107</b> | 222.121692       | 442.252091     | 221.629684       | 3  |
| 9  | 1028.500714       | 514.753995      | 1011.474165    | 506.240721       | 1010.490149       | 505.748713       | E    | 304.161545        | <b>152.584411</b> | 287.134996        | 144.071136       | 286.150980     | 143.579128       | 2  |
| 10 |                   |                 |                |                  |                   |                  | R    | <b>175.118952</b> | 88.063114         | <b>158.092403</b> | 79.549839        |                |                  | 1  |

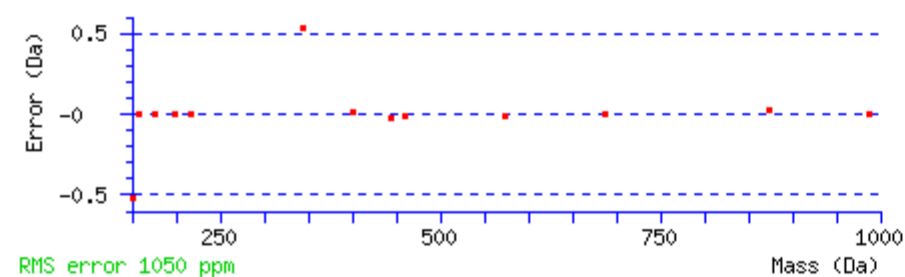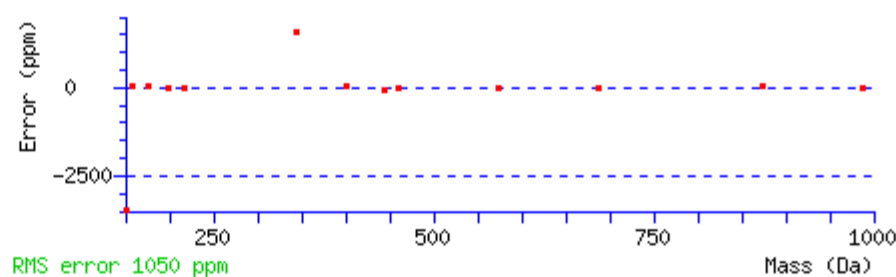

NCBI BLAST search of [TNLADDIRER](#)

(Parameters: blastp, nr protein database, expect=20000, no filter, PAM30)

Other BLAST [web gateways](#)

**All matches to this query**

| Score | Mr(calc):   | Delta     | Sequence                     |
|-------|-------------|-----------|------------------------------|
| 33.6  | 1201.605087 | -0.003699 | <a href="#">TNLADDIRER</a>   |
| 11.0  | 1201.605087 | -0.003699 | <a href="#">SQELDNKNVR</a>   |
| 8.6   | 1201.601273 | 0.000115  | <a href="#">GKPEDVMPSVK</a>  |
| 8.6   | 1201.593887 | 0.007501  | <a href="#">GPPVTPSSEKR</a>  |
| 4.5   | 1201.605103 | -0.003715 | <a href="#">SLQDEVSPRR</a>   |
| 1.8   | 1201.593872 | 0.007516  | <a href="#">QDTVELQNQK</a>   |
| 1.3   | 1201.593857 | 0.007531  | <a href="#">GKEEELQDVR</a>   |
| 0.8   | 1201.597916 | 0.003472  | <a href="#">GFDGLPGLPGEK</a> |
| 0.5   | 1201.601242 | 0.000146  | <a href="#">EMAQGLLPEAK</a>  |
| 0.3   | 1201.595215 | 0.006173  | <a href="#">GKGAAGGSWQQR</a> |

# **MATRIX** SCIENCE Mascot Search Results

## Peptide View

MS/MS Fragmentation of **LLNGPPRGIR**

Found in **PDZD7\_HUMAN**, PDZ domain-containing protein 7 OS=Homo sapiens GN=PDZD7 PE=1 SV=1

Match to Query 23951: 1123.641708 from(562.828130,2+) rtinseconds(2948) index(39571)

Title: Locus:1.1.1.2543.12

Data file 2011-11-10 - TFD - EP 3-1.mgf

Click mouse within plot area to zoom in by factor of two about that point

Or, Plot from  to  Da

Label all possible matches  Label matches used for scoring

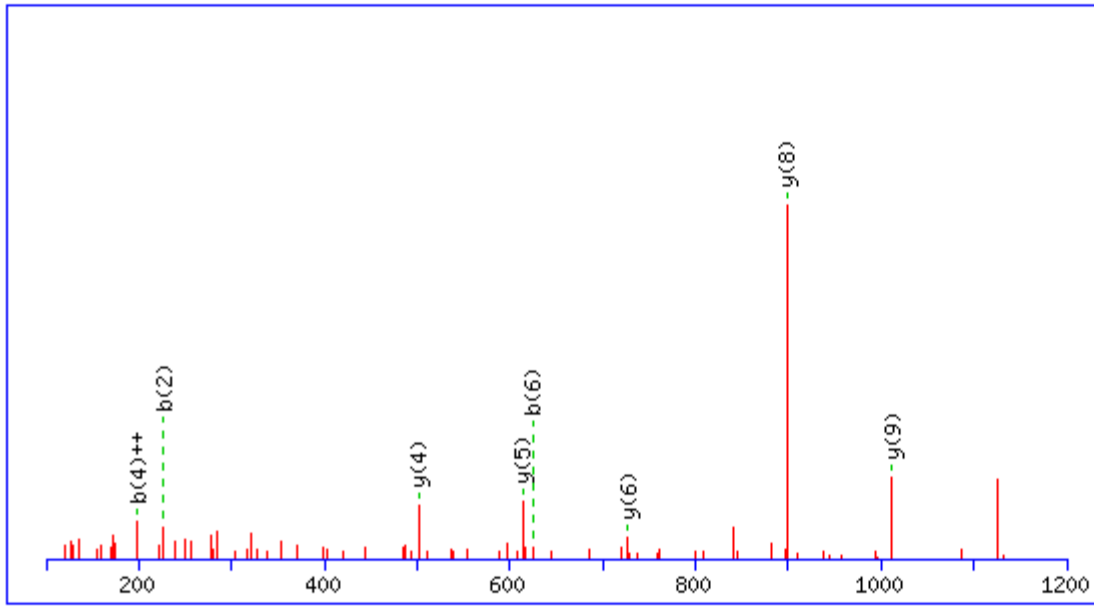

Monoisotopic mass of neutral peptide Mr(calc): 1123.646179

Fixed modifications: Propionamide (C) (apply to specified residues or termini only)

Variable modifications:

P5 : Oxidation (P)

P6 : Oxidation (P)

Ions Score: 37 Expect: 0.0012

Matches : 8/68 fragment ions using 10 most intense peaks ([help](#))

| #  | b                 | b <sup>++</sup>   | b <sup>*</sup> | b <sup>*++</sup> | Seq. | y                  | y <sup>++</sup> | y <sup>*</sup> | y <sup>*++</sup> | #  |
|----|-------------------|-------------------|----------------|------------------|------|--------------------|-----------------|----------------|------------------|----|
| 1  | 114.091340        | 57.549308         |                |                  | L    |                    |                 |                |                  | 10 |
| 2  | <b>227.175404</b> | 114.091340        |                |                  | L    | <b>1011.569404</b> | 506.288340      | 994.542855     | 497.775065       | 9  |
| 3  | 341.218331        | 171.112803        | 324.191782     | 162.599529       | N    | <b>898.485340</b>  | 449.746308      | 881.458791     | 441.233033       | 8  |
| 4  | 398.239795        | <b>199.623535</b> | 381.213246     | 191.110261       | G    | 784.442413         | 392.724845      | 767.415864     | 384.211570       | 7  |
| 5  | 511.287474        | 256.147375        | 494.260925     | 247.634100       | P    | <b>727.420949</b>  | 364.214113      | 710.394400     | 355.700838       | 6  |
| 6  | <b>624.335153</b> | 312.671215        | 607.308604     | 304.157940       | P    | <b>614.373270</b>  | 307.690273      | 597.346721     | 299.176999       | 5  |
| 7  | 780.436264        | 390.721770        | 763.409715     | 382.208495       | R    | <b>501.325591</b>  | 251.166433      | 484.299042     | 242.653159       | 4  |
| 8  | 837.457728        | 419.232502        | 820.431179     | 410.719227       | G    | 345.224480         | 173.115878      | 328.197931     | 164.602603       | 3  |
| 9  | 950.541792        | 475.774534        | 933.515243     | 467.261259       | I    | 288.203016         | 144.605146      | 271.176467     | 136.091871       | 2  |
| 10 |                   |                   |                |                  | R    | 175.118952         | 88.063114       | 158.092403     | 79.549839        | 1  |

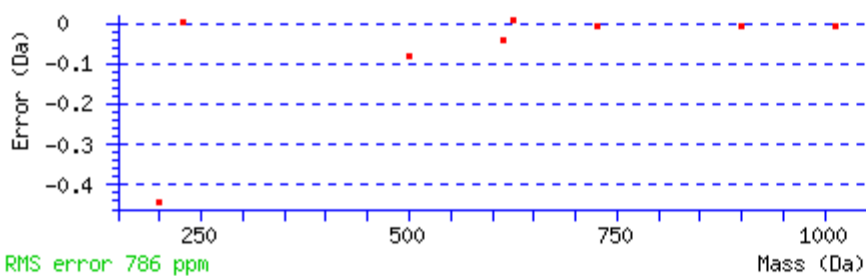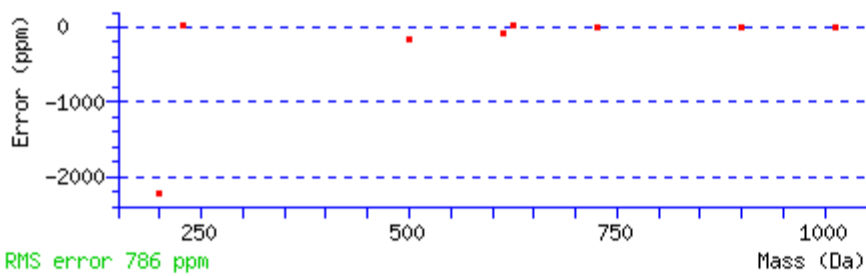

NCBI BLAST search of **LLNGPPRGIR**

(Parameters: blastp, nr protein database, expect=20000, no filter, PAM30)

Other BLAST [web gateways](#)

All matches to this query

| Score | Mr(calc):   | Delta     | Sequence                   |
|-------|-------------|-----------|----------------------------|
| 40.4  | 1123.638947 | 0.002761  | <a href="#">IIGNLLYYR</a>  |
| 36.8  | 1123.646179 | -0.004471 | <a href="#">LLNGPPRGIR</a> |
| 5.3   | 1123.634949 | 0.006759  | <a href="#">INIGPEVVQR</a> |
| 4.6   | 1123.646179 | -0.004471 | <a href="#">LLTHRTLDR</a>  |
| 1.4   | 1123.638962 | 0.002746  | <a href="#">LILDLSHWK</a>  |
| 1.3   | 1123.634918 | 0.006790  | <a href="#">LEEHSRIK</a>   |
| 1.0   | 1123.631088 | 0.010620  | <a href="#">LLSKFEMIK</a>  |

**Peptide View**

MS/MS Fragmentation of **TVENFVALATGEK**

Found in **PPIC\_HUMAN**, Peptidyl-prolyl cis-trans isomerase C OS=Homo sapiens GN=PPIC PE=1 SV=1

Match to Query 45659: 1377.712728 from(689.863640,2+) rtinseconds(3181) index(42857)

Title: Locus:1.1.1.2467.37

Data file 2011-11-10 - TFD - EP 4-6.mgf

Click mouse within plot area to zoom in by factor of two about that point

Or, Plot from  to  Da

Label all possible matches  Label matches used for scoring

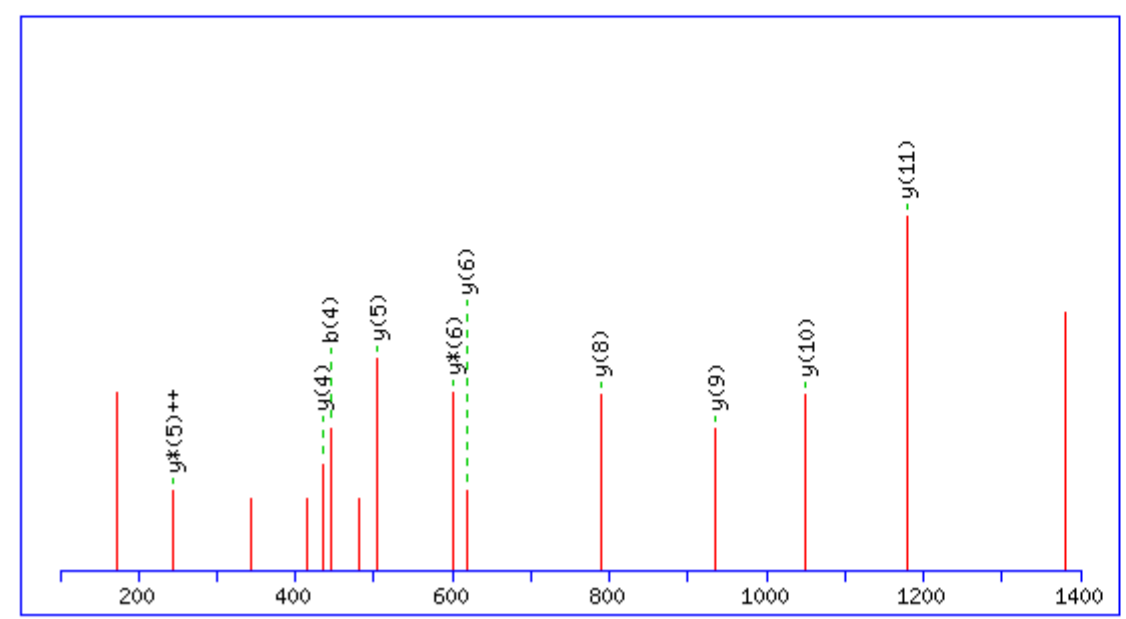

Monoisotopic mass of neutral peptide Mr(calcd): 1377.713989

Fixed modifications: Propionamide (C) (apply to specified residues or termini only)

Ions Score: 53 Expect: 5.2e-005

Matches : 10/136 fragment ions using 14 most intense peaks [\(help\)](#)

| #  | b                 | b <sup>++</sup> | b <sup>*</sup> | b <sup>*++</sup> | b <sup>0</sup> | b <sup>0++</sup> | Seq. | y                  | y <sup>++</sup> | y <sup>*</sup>    | y <sup>*++</sup>  | y <sup>0</sup> | y <sup>0++</sup> | #  |
|----|-------------------|-----------------|----------------|------------------|----------------|------------------|------|--------------------|-----------------|-------------------|-------------------|----------------|------------------|----|
| 1  | 102.054955        | 51.531116       |                |                  | 84.044390      | 42.525833        | T    |                    |                 |                   |                   |                |                  | 13 |
| 2  | 201.123369        | 101.065322      |                |                  | 183.112804     | 92.060040        | V    | 1277.673594        | 639.340435      | 1260.647045       | 630.827160        | 1259.663029    | 630.335152       | 12 |
| 3  | 330.165962        | 165.586619      |                |                  | 312.155397     | 156.581336       | E    | <b>1178.605180</b> | 589.806228      | 1161.578631       | 581.292953        | 1160.594615    | 580.800945       | 11 |
| 4  | <b>444.208889</b> | 222.608082      | 427.182340     | 214.094808       | 426.198324     | 213.602800       | N    | <b>1049.562587</b> | 525.284931      | 1032.536038       | 516.771657        | 1031.552022    | 516.279649       | 10 |
| 5  | 591.277303        | 296.142290      | 574.250754     | 287.629015       | 573.266738     | 287.137007       | F    | <b>935.519660</b>  | 468.263468      | 918.493111        | 459.750193        | 917.509095     | 459.258185       | 9  |
| 6  | 690.345717        | 345.676497      | 673.319168     | 337.163222       | 672.335152     | 336.671214       | V    | <b>788.451246</b>  | 394.729261      | 771.424697        | 386.215986        | 770.440681     | 385.723978       | 8  |
| 7  | 761.382831        | 381.195054      | 744.356282     | 372.681779       | 743.372266     | 372.189771       | A    | 689.382832         | 345.195054      | 672.356283        | 336.681779        | 671.372267     | 336.189771       | 7  |
| 8  | 874.466895        | 437.737086      | 857.440346     | 429.223811       | 856.456330     | 428.731803       | L    | <b>618.345718</b>  | 309.676497      | <b>601.319169</b> | 301.163222        | 600.335153     | 300.671214       | 6  |
| 9  | 945.504009        | 473.255643      | 928.477460     | 464.742368       | 927.493444     | 464.250360       | A    | <b>505.261654</b>  | 253.134465      | 488.235105        | <b>244.621190</b> | 487.251089     | 244.129182       | 5  |
| 10 | 1046.551688       | 523.779482      | 1029.525139    | 515.266208       | 1028.541123    | 514.774200       | T    | <b>434.224540</b>  | 217.615908      | 417.197991        | 209.102633        | 416.213975     | 208.610625       | 4  |
| 11 | 1103.573152       | 552.290214      | 1086.546603    | 543.776940       | 1085.562587    | 543.284931       | G    | 333.176861         | 167.092068      | 316.150312        | 158.578794        | 315.166296     | 158.086786       | 3  |
| 12 | 1232.615745       | 616.811510      | 1215.589196    | 608.298236       | 1214.605180    | 607.806228       | E    | 276.155397         | 138.581336      | 259.128848        | 130.068062        | 258.144832     | 129.576054       | 2  |
| 13 |                   |                 |                |                  |                |                  | K    | 147.112804         | 74.060040       | 130.086255        | 65.546765         |                |                  | 1  |

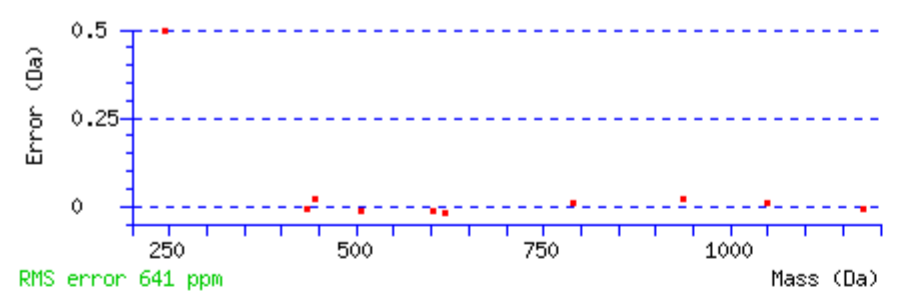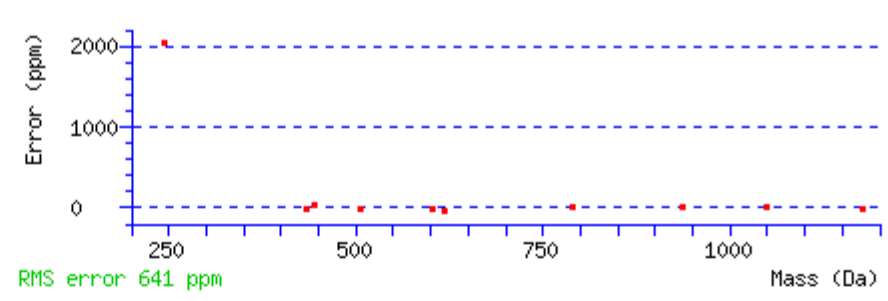

NCBI BLAST search of **TVENFVALATGEK**

(Parameters: blastp, nr protein database, expect=20000, no filter, PAM30)

Other BLAST [web gateways](#)

**All matches to this query**

| Score | Mr(calcd):  | Delta     | Sequence                      |
|-------|-------------|-----------|-------------------------------|
| 53.4  | 1377.713989 | -0.001261 | <a href="#">TVENFVALATGEK</a> |
| 7.3   | 1377.707458 | 0.005270  | <a href="#">QLYVLGSPAMQR</a>  |
| 2.6   | 1377.700027 | 0.012701  | <a href="#">LSERENQYALR</a>   |
| 0.7   | 1377.707443 | 0.005285  | <a href="#">LLQEKFPNMSR</a>   |
| 0.6   | 1377.718689 | -0.005961 | <a href="#">SPAMSGGIFAIRR</a> |

# **MATRIX** SCIENCE Mascot Search Results

## Peptide View

MS/MS Fragmentation of **ILLITEDLK**

Found in **PPID\_HUMAN**, Peptidyl-prolyl cis-trans isomerase D OS=Homo sapiens GN=PPID PE=1 SV=3

Match to Query 19271: 1056.640968 from(529.327760,2+) rtinseconds(2960) index(40503)

Title: Locus:1.1.1.2555.7

Data file 2011-11-13 - TFD - EP 7-4.mgf

Click mouse within plot area to zoom in by factor of two about that point

Or, Plot from  to  Da

Label all possible matches  Label matches used for scoring

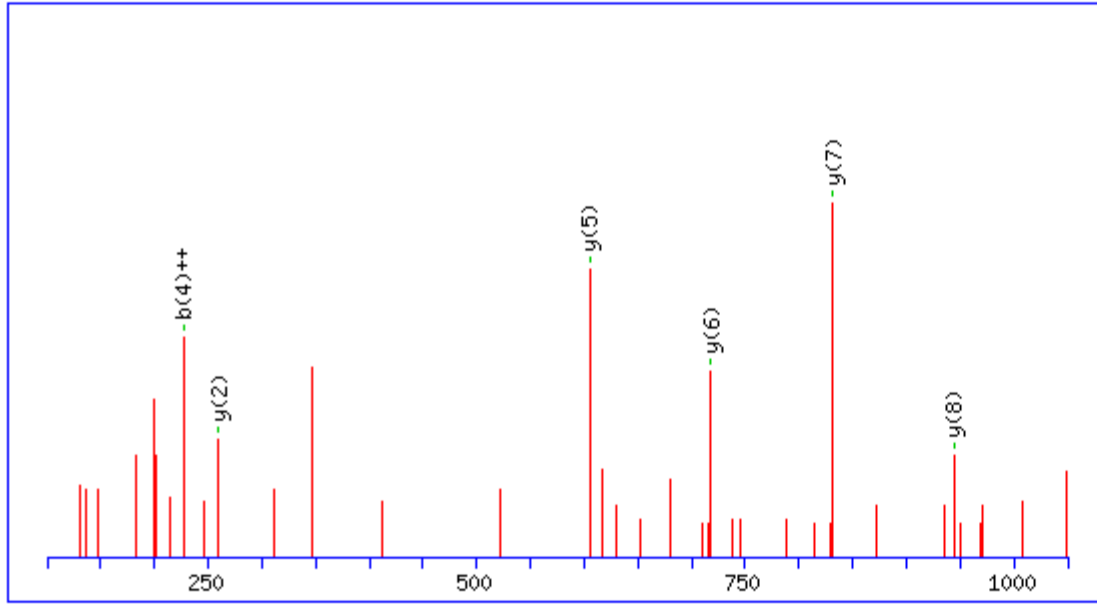

Monoisotopic mass of neutral peptide Mr(calc): 1056.643036

Fixed modifications: Propionamide (C) (apply to specified residues or termini only)

Ions Score: 31 Expect: 0.0011

Matches : 7/68 fragment ions using 10 most intense peaks [\(help\)](#)

| # | b                 | b <sup>++</sup>   | b <sup>0</sup> | b <sup>0++</sup> | Seq. | y                 | y <sup>++</sup> | y <sup>*</sup> | y <sup>*++</sup> | y <sup>0</sup> | y <sup>0++</sup> | # |
|---|-------------------|-------------------|----------------|------------------|------|-------------------|-----------------|----------------|------------------|----------------|------------------|---|
| 1 | 114.091340        | 57.549308         |                |                  | I    |                   |                 |                |                  |                |                  | 9 |
| 2 | <b>227.175404</b> | 114.091340        |                |                  | L    | <b>944.566275</b> | 472.786776      | 927.539726     | 464.273501       | 926.555710     | 463.781493       | 8 |
| 3 | 340.259468        | 170.633372        |                |                  | L    | <b>831.482211</b> | 416.244744      | 814.455662     | 407.731469       | 813.471646     | 407.239461       | 7 |
| 4 | 453.343532        | <b>227.175404</b> |                |                  | I    | <b>718.398147</b> | 359.702712      | 701.371598     | 351.189437       | 700.387582     | 350.697429       | 6 |
| 5 | 554.391211        | 277.699244        | 536.380646     | 268.693961       | T    | <b>605.314083</b> | 303.160680      | 588.287534     | 294.647405       | 587.303518     | 294.155397       | 5 |
| 6 | 683.433804        | 342.220540        | 665.423239     | 333.215258       | E    | 504.266404        | 252.636840      | 487.239855     | 244.123565       | 486.255839     | 243.631557       | 4 |
| 7 | 798.460747        | 399.734012        | 780.450182     | 390.728729       | D    | 375.223811        | 188.115543      | 358.197262     | 179.602269       | 357.213246     | 179.110261       | 3 |
| 8 | 911.544811        | 456.276044        | 893.534246     | 447.270761       | L    | <b>260.196868</b> | 130.602072      | 243.170319     | 122.088798       |                |                  | 2 |
| 9 |                   |                   |                |                  | K    | 147.112804        | 74.060040       | 130.086255     | 65.546765        |                |                  | 1 |

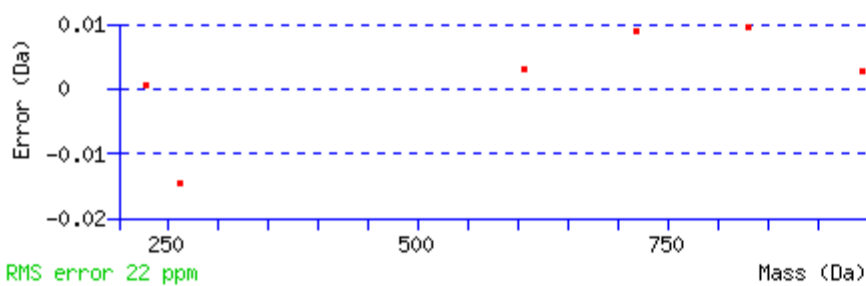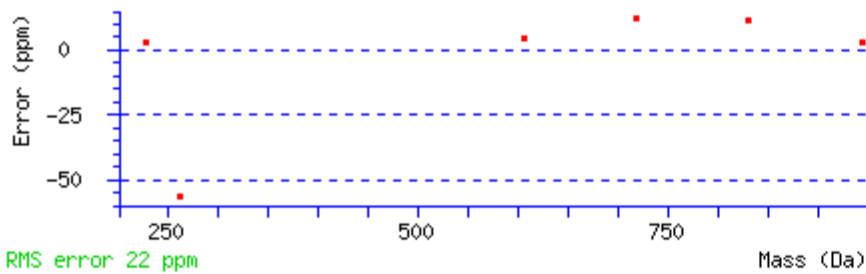

NCBI BLAST search of [ILLITEDLK](#)

(Parameters: blastp, nr protein database, expect=20000, no filter, PAM30)

Other BLAST [web gateways](#)

## All matches to this query

| Score | Mr(calc):   | Delta     | Sequence                   |
|-------|-------------|-----------|----------------------------|
| 30.7  | 1056.643036 | -0.002068 | <a href="#">ILLITEDLK</a>  |
| 17.8  | 1056.647736 | -0.006768 | <a href="#">LLLRCQLK</a>   |
| 17.5  | 1056.633179 | 0.007789  | <a href="#">LPLPVFTVR</a>  |
| 4.5   | 1056.636505 | 0.004463  | <a href="#">LMALLGQALK</a> |

# **MATRIX** SCIENCE Mascot Search Results

## Peptide View

MS/MS Fragmentation of **VLEVNPQNK**

Found in **FKBP5\_HUMAN**, Peptidyl-prolyl cis-trans isomerase FKBP5 OS=Homo sapiens GN=FKBP5 PE=1 SV=2

Match to Query 12439: 1039.563648 from(520.789100,2+) rtinseconds(1152) index(5868)

Title: Locus:1.1.1.1950.30

Data file 2011-11-12 - TFD - EP 5-3.mgf

Click mouse within plot area to zoom in by factor of two about that point

Or, Plot from  to  Da

Label all possible matches  Label matches used for scoring

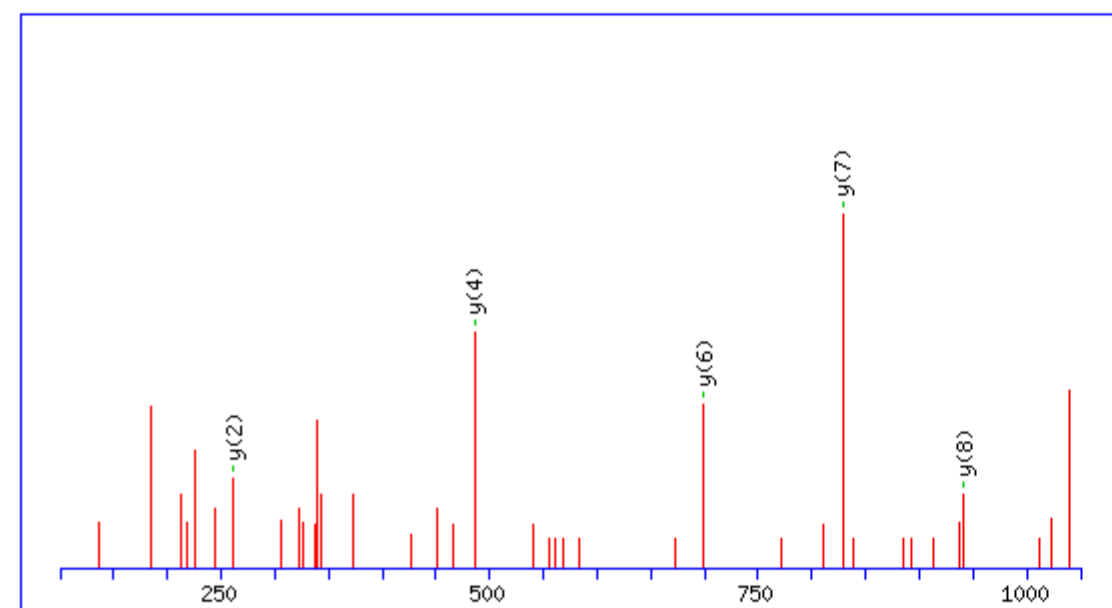

Monoisotopic mass of neutral peptide Mr(calc): 1039.566193

Fixed modifications: Propionamide (C) (apply to specified residues or termini only)

Ions Score: 33 Expect: 0.0044

Matches : 5/72 fragment ions using 9 most intense peaks [\(help\)](#)

| # | b          | b <sup>++</sup> | b <sup>+</sup> | b <sup>+++</sup> | b <sup>0</sup> | b <sup>0++</sup> | Seq. | y                 | y <sup>++</sup> | y <sup>+</sup> | y <sup>+++</sup> | y <sup>0</sup> | y <sup>0++</sup> | # |
|---|------------|-----------------|----------------|------------------|----------------|------------------|------|-------------------|-----------------|----------------|------------------|----------------|------------------|---|
| 1 | 100.075690 | 50.541483       |                |                  |                |                  | V    |                   |                 |                |                  |                |                  | 9 |
| 2 | 213.159754 | 107.083515      |                |                  |                |                  | L    | <b>941.505071</b> | 471.256174      | 924.478522     | 462.742899       | 923.494506     | 462.250891       | 8 |
| 3 | 342.202347 | 171.604811      |                |                  | 324.191782     | 162.599529       | E    | <b>828.421007</b> | 414.714142      | 811.394458     | 406.200867       | 810.410442     | 405.708859       | 7 |
| 4 | 441.270761 | 221.139018      |                |                  | 423.260196     | 212.133736       | V    | <b>699.378414</b> | 350.192845      | 682.351865     | 341.679571       |                |                  | 6 |
| 5 | 555.313688 | 278.160482      | 538.287139     | 269.647208       | 537.303123     | 269.155200       | N    | 600.310000        | 300.658638      | 583.283451     | 292.145364       |                |                  | 5 |
| 6 | 652.366452 | 326.686864      | 635.339903     | 318.173590       | 634.355887     | 317.681582       | P    | <b>486.267073</b> | 243.637174      | 469.240524     | 235.123900       |                |                  | 4 |
| 7 | 780.425030 | 390.716153      | 763.398481     | 382.202879       | 762.414465     | 381.710871       | Q    | 389.214309        | 195.110792      | 372.187760     | 186.597518       |                |                  | 3 |
| 8 | 894.467957 | 447.737617      | 877.441408     | 439.224342       | 876.457392     | 438.732334       | N    | <b>261.155731</b> | 131.081503      | 244.129182     | 122.568229       |                |                  | 2 |
| 9 |            |                 |                |                  |                |                  | K    | 147.112804        | 74.060040       | 130.086255     | 65.546765        |                |                  | 1 |

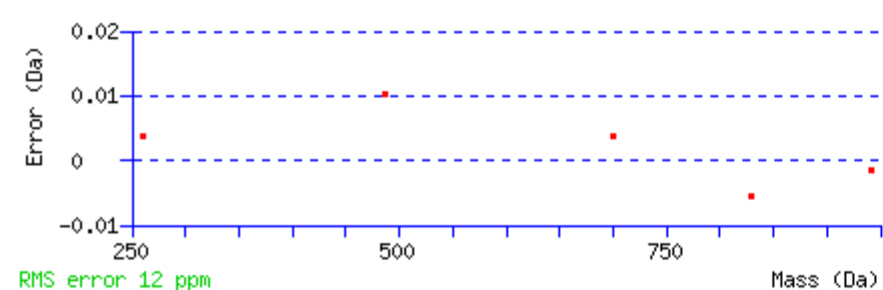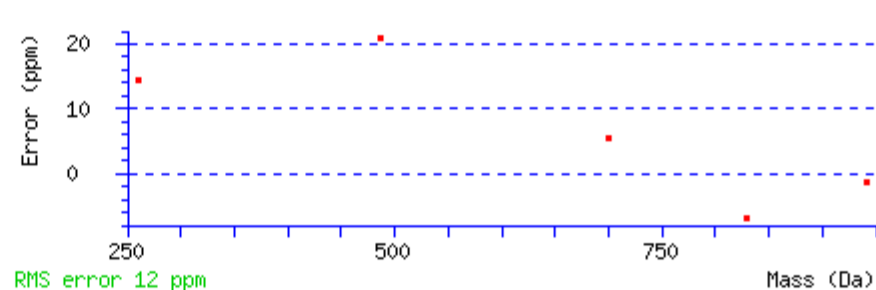

NCBI BLAST search of [VLEVNPQNK](#)

(Parameters: blastp, nr protein database, expect=20000, no filter, PAM30)

Other BLAST [web gateways](#)

## All matches to this query

| Score | Mr(calc):   | Delta     | Sequence                   |
|-------|-------------|-----------|----------------------------|
| 32.6  | 1039.566193 | -0.002545 | <a href="#">VLEVNPQNK</a>  |
| 15.4  | 1039.554977 | 0.008671  | <a href="#">VPEKPPTPK</a>  |
| 9.3   | 1039.554977 | 0.008671  | <a href="#">VPEKPPTPK</a>  |
| 9.3   | 1039.554977 | 0.008671  | <a href="#">VPEKPPTPK</a>  |
| 9.0   | 1039.559677 | 0.003971  | <a href="#">VLMQVHASR</a>  |
| 7.0   | 1039.566208 | -0.002560 | <a href="#">VPGIPGEISR</a> |
| 6.6   | 1039.566208 | -0.002560 | <a href="#">DPVGLQLGNK</a> |

Mascot: <http://www.matrixscience.com/>



# MASCOT SCIENCE Mascot Search Results

## Peptide View

MS/MS Fragmentation of **ILSCGELIPK**

Found in **PPIG\_HUMAN**, Peptidyl-prolyl cis-trans isomerase G OS=Homo sapiens GN=PPIG PE=1 SV=2

Match to Query 431555: 1128.612388 from(565.313470,2+) rtinseconds(3149) index(450743)

Title: Locus:1.1.1.1544.9

Data file C:\Program Files (x86)\Matrix Science\Mascot Daemon\mgf3 TFD - Epitel - R2\mascot\_daemon\_merge.mgf

Click mouse within plot area to zoom in by factor of two about that point

Or, Plot from  to  Da

Label all possible matches  Label matches used for scoring

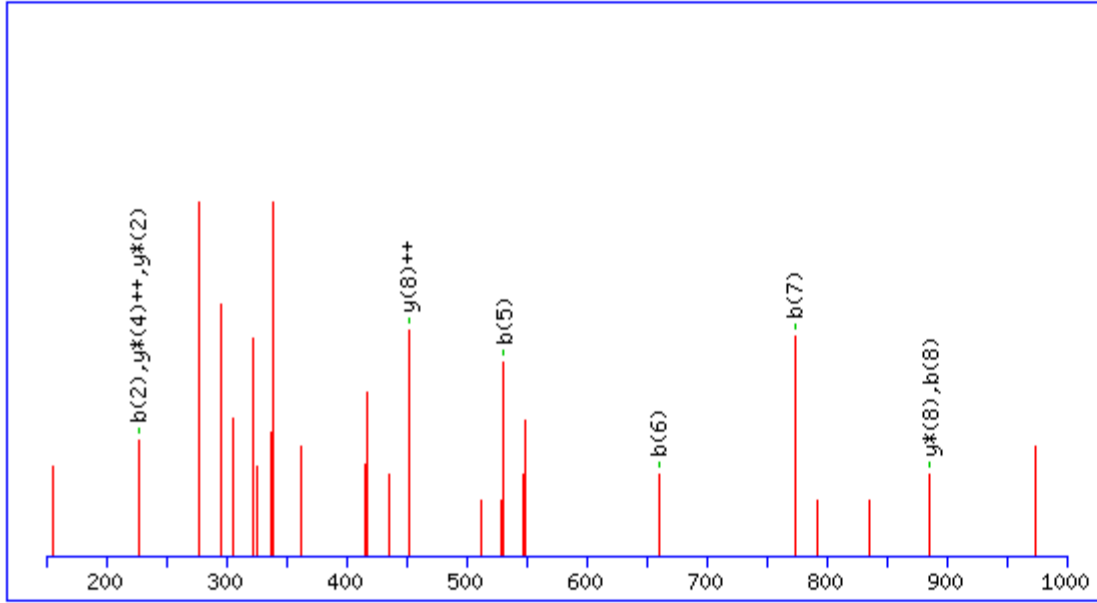

Monoisotopic mass of neutral peptide Mr(calc): 1128.621262

Fixed modifications: Carbamidomethyl (C) (apply to specified residues or termini only)

Ions Score: 33 Expect: 0.005

Matches : 9/78 fragment ions using 8 most intense peaks ([help](#))

| #  | b                 | b <sup>++</sup> | b <sup>0</sup> | b <sup>0++</sup> | Seq. | y           | y <sup>++</sup>   | y <sup>*</sup>    | y <sup>*++</sup>  | y <sup>0</sup> | y <sup>0++</sup> | #  |
|----|-------------------|-----------------|----------------|------------------|------|-------------|-------------------|-------------------|-------------------|----------------|------------------|----|
| 1  | 114.091340        | 57.549308       |                |                  | I    |             |                   |                   |                   |                |                  | 10 |
| 2  | <b>227.175404</b> | 114.091340      |                |                  | L    | 1016.544494 | 508.775885        | 999.517945        | 500.262611        | 998.533929     | 499.770603       | 9  |
| 3  | 314.207432        | 157.607354      | 296.196867     | 148.602071       | S    | 903.460430  | <b>452.233853</b> | <b>886.433881</b> | 443.720579        | 885.449865     | 443.228571       | 8  |
| 4  | 474.238081        | 237.622679      | 456.227516     | 228.617396       | C    | 816.428402  | 408.717839        | 799.401853        | 400.204565        | 798.417837     | 399.712557       | 7  |
| 5  | <b>531.259545</b> | 266.133411      | 513.248980     | 257.128128       | G    | 656.397753  | 328.702515        | 639.371204        | 320.189240        | 638.387188     | 319.697232       | 6  |
| 6  | <b>660.302138</b> | 330.654707      | 642.291573     | 321.649425       | E    | 599.376289  | 300.191783        | 582.349740        | 291.678508        | 581.365724     | 291.186500       | 5  |
| 7  | <b>773.386202</b> | 387.196739      | 755.375637     | 378.191457       | L    | 470.333696  | 235.670486        | 453.307147        | <b>227.157211</b> |                |                  | 4  |
| 8  | <b>886.470266</b> | 443.738771      | 868.459701     | 434.733489       | I    | 357.249632  | 179.128454        | 340.223083        | 170.615179        |                |                  | 3  |
| 9  | 983.523030        | 492.265153      | 965.512465     | 483.259871       | P    | 244.165568  | 122.586422        | <b>227.139019</b> | 114.073147        |                |                  | 2  |
| 10 |                   |                 |                |                  | K    | 147.112804  | 74.060040         | 130.086255        | 65.546765         |                |                  | 1  |

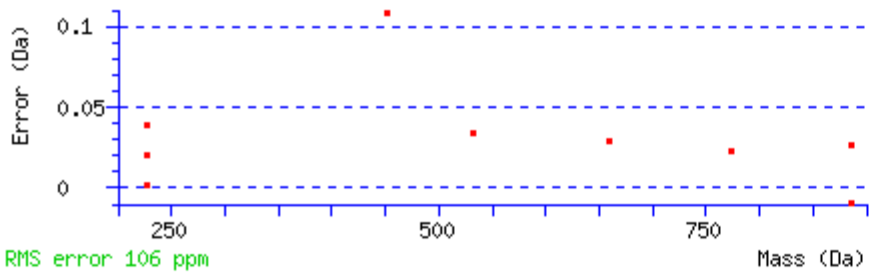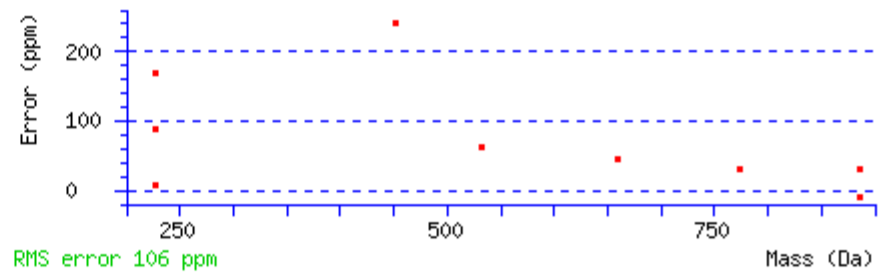

NCBI BLAST search of **ILSCGELIPK**

(Parameters: blastp, nr protein database, expect=20000, no filter, PAM30)

Other BLAST [web gateways](#)

### All matches to this query

| Score | Mr(calc):   | Delta     | Sequence                     |
|-------|-------------|-----------|------------------------------|
| 33.0  | 1128.621262 | -0.008874 | <a href="#">ILSCGELIPK</a>   |
| 8.0   | 1128.613861 | -0.001473 | <a href="#">DQLELDRLK</a>    |
| 7.1   | 1128.613861 | -0.001473 | <a href="#">LQDLEVREK</a>    |
| 7.1   | 1128.617905 | -0.005517 | <a href="#">FVNLGIEPPK</a>   |
| 6.0   | 1128.602646 | 0.009742  | <a href="#">TDVEKSLPPK</a>   |
| 5.8   | 1128.621262 | -0.008874 | <a href="#">LPQITEIGMK</a>   |
| 5.8   | 1128.621277 | -0.008889 | <a href="#">QLPPTVISMK</a>   |
| 4.2   | 1128.621277 | -0.008889 | <a href="#">PNILVLGAAVM</a>  |
| 1.4   | 1128.621262 | -0.008874 | <a href="#">PAGLIAGASLLM</a> |
| 0.7   | 1128.617889 | -0.005501 | <a href="#">WIGELQLSIA</a>   |

Mascot: <http://www.matrixscience.com/>

# Mascot Search Results

## Peptide View

MS/MS Fragmentation of **APDEETLIALLAHAK**

Found in **PTH2\_HUMAN**, Peptidyl-tRNA hydrolase 2, mitochondrial OS=Homo sapiens GN=PTRH2 PE=1 SV=1

Match to Query 48247: 1590.858942 from(531.293590,3+) rtinseconds(3685) index(51070)

Title: Locus:1.1.1.2553.6

Data file 2011-11-12 - TFD - EP 6-6.mgf

Click mouse within plot area to zoom in by factor of two about that point

Or, Plot from  to  Da

Label all possible matches  Label matches used for scoring

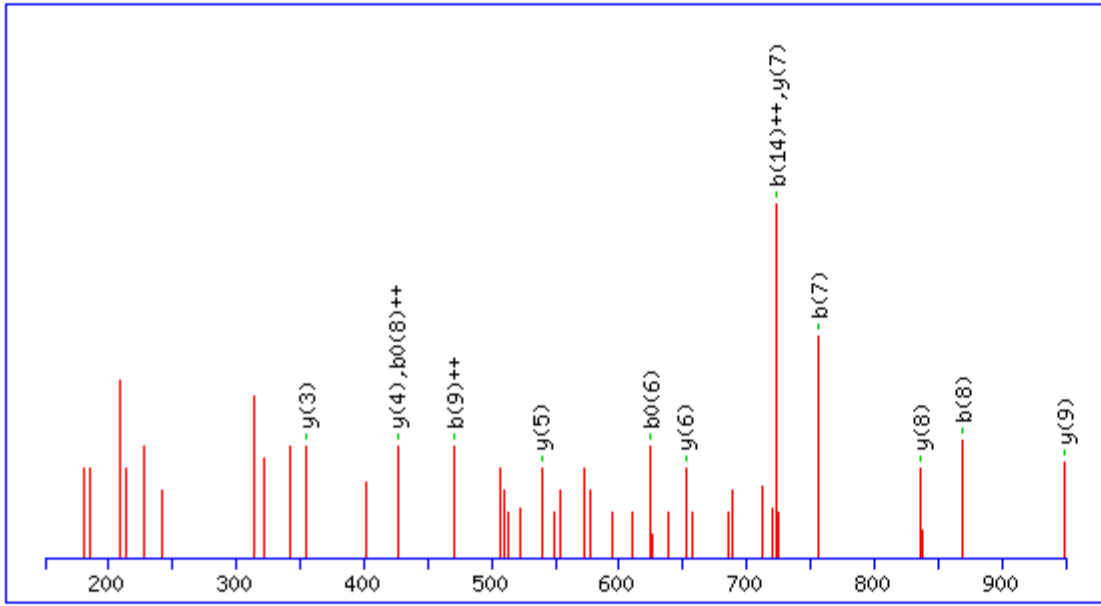

Monoisotopic mass of neutral peptide Mr(calc): 1590.861679

Fixed modifications: Propionamide (C) (apply to specified residues or termini only)

Ions Score: 52 Expect: 5.2e-005

Matches : 13/118 fragment ions using 15 most intense peaks ([help](#))

| #  | b           | b <sup>++</sup> | b <sup>0</sup> | b <sup>0++</sup> | Seq. | y           | y <sup>++</sup> | y <sup>*</sup> | y <sup>*++</sup> | y <sup>0</sup> | y <sup>0++</sup> | #  |
|----|-------------|-----------------|----------------|------------------|------|-------------|-----------------|----------------|------------------|----------------|------------------|----|
| 1  | 72.044390   | 36.525833       |                |                  | A    |             |                 |                |                  |                |                  | 15 |
| 2  | 169.097154  | 85.052215       |                |                  | P    | 1520.831886 | 760.919581      | 1503.805337    | 752.406307       | 1502.821321    | 751.914298       | 14 |
| 3  | 284.124097  | 142.565687      | 266.113532     | 133.560404       | D    | 1423.779122 | 712.393199      | 1406.752573    | 703.879925       | 1405.768557    | 703.387916       | 13 |
| 4  | 413.166690  | 207.086983      | 395.156125     | 198.081701       | E    | 1308.752179 | 654.879727      | 1291.725630    | 646.366453       | 1290.741614    | 645.874445       | 12 |
| 5  | 542.209283  | 271.608280      | 524.198718     | 262.602997       | E    | 1179.709586 | 590.358431      | 1162.683037    | 581.845157       | 1161.699021    | 581.353148       | 11 |
| 6  | 643.256962  | 322.132119      | 625.246397     | 313.126837       | T    | 1050.666993 | 525.837134      | 1033.640444    | 517.323860       | 1032.656428    | 516.831852       | 10 |
| 7  | 756.341026  | 378.674151      | 738.330461     | 369.668869       | L    | 949.619314  | 475.313295      | 932.592765     | 466.800020       |                |                  | 9  |
| 8  | 869.425090  | 435.216183      | 851.414525     | 426.210901       | I    | 836.535250  | 418.771263      | 819.508701     | 410.257988       |                |                  | 8  |
| 9  | 940.462204  | 470.734740      | 922.451639     | 461.729458       | A    | 723.451186  | 362.229231      | 706.424637     | 353.715956       |                |                  | 7  |
| 10 | 1053.546268 | 527.276772      | 1035.535703    | 518.271490       | L    | 652.414072  | 326.710674      | 635.387523     | 318.197399       |                |                  | 6  |
| 11 | 1166.630332 | 583.818804      | 1148.619767    | 574.813521       | L    | 539.330008  | 270.168642      | 522.303459     | 261.655367       |                |                  | 5  |
| 12 | 1237.667446 | 619.337361      | 1219.656881    | 610.332078       | A    | 426.245944  | 213.626610      | 409.219395     | 205.113335       |                |                  | 4  |
| 13 | 1374.726358 | 687.866817      | 1356.715793    | 678.861534       | H    | 355.208830  | 178.108053      | 338.182281     | 169.594778       |                |                  | 3  |
| 14 | 1445.763472 | 723.385374      | 1427.752907    | 714.380091       | A    | 218.149918  | 109.578597      | 201.123369     | 101.065322       |                |                  | 2  |
| 15 |             |                 |                |                  | K    | 147.112804  | 74.060040       | 130.086255     | 65.546765        |                |                  | 1  |

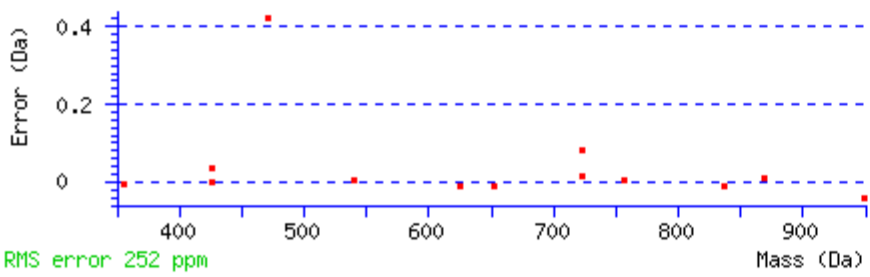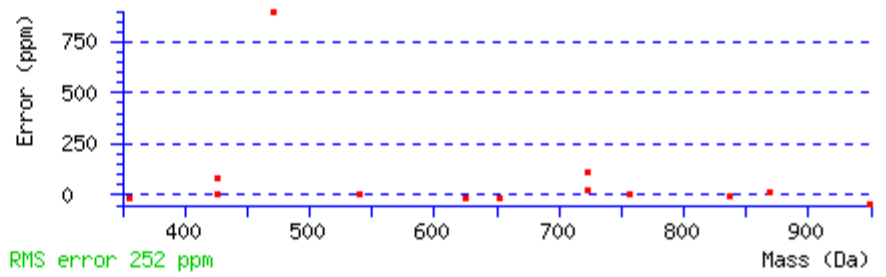

NCBI BLAST search of [APDEETLIALLAHAK](#)

(Parameters: blastp, nr protein database, expect=20000, no filter, PAM30)

Other BLAST [web gateways](#)

## All matches to this query

| Score | Mr(calc):   | Delta     | Sequence                        |
|-------|-------------|-----------|---------------------------------|
| 51.8  | 1590.861679 | -0.002737 | <a href="#">APDEETLIALLAHAK</a> |
| 8.0   | 1590.850449 | 0.008493  | <a href="#">ILSESLTTPAEYQK</a>  |
| 5.6   | 1590.859009 | -0.000067 | <a href="#">QTLNRPPAAPNQLR</a>  |
| 4.5   | 1590.861725 | -0.002783 | <a href="#">DVPKPISNGLPPTPK</a> |
| 3.2   | 1590.859009 | -0.000067 | <a href="#">SLQRDPRPAGPAQAK</a> |
| 2.1   | 1590.859009 | -0.000067 | <a href="#">QTLNRPPAAPNQLR</a>  |
| 1.4   | 1590.843979 | 0.014963  | <a href="#">ALMTGSLPGFVDVIR</a> |
| 1.4   | 1590.855179 | 0.003763  | <a href="#">SVAHGQAPEMPLVKK</a> |
| 0.8   | 1590.859009 | -0.000067 | <a href="#">QTLNRPPAAPNQLR</a>  |
| 0.4   | 1590.861710 | -0.002768 | <a href="#">KTTSNTPPITGAIYK</a> |

**MATRIX SCIENCE Mascot Search Results**

**Peptide View**

MS/MS Fragmentation of **LGELILTSESSR**

Found in **ICT1\_HUMAN**, Peptidyl-tRNA hydrolase ICT1, mitochondrial OS=Homo sapiens GN=ICT1 PE=1 SV=1

Match to Query 34875: 1303.696528 from(652.855540,2+) rtinseconds(2459) index(28260)

Title: Locus:1.1.1.2227.42

Data file 2011-11-13 - TFD - EP 7-6.mgf

Click mouse within plot area to zoom in by factor of two about that point

Or, Plot from  to  Da

Label all possible matches  Label matches used for scoring

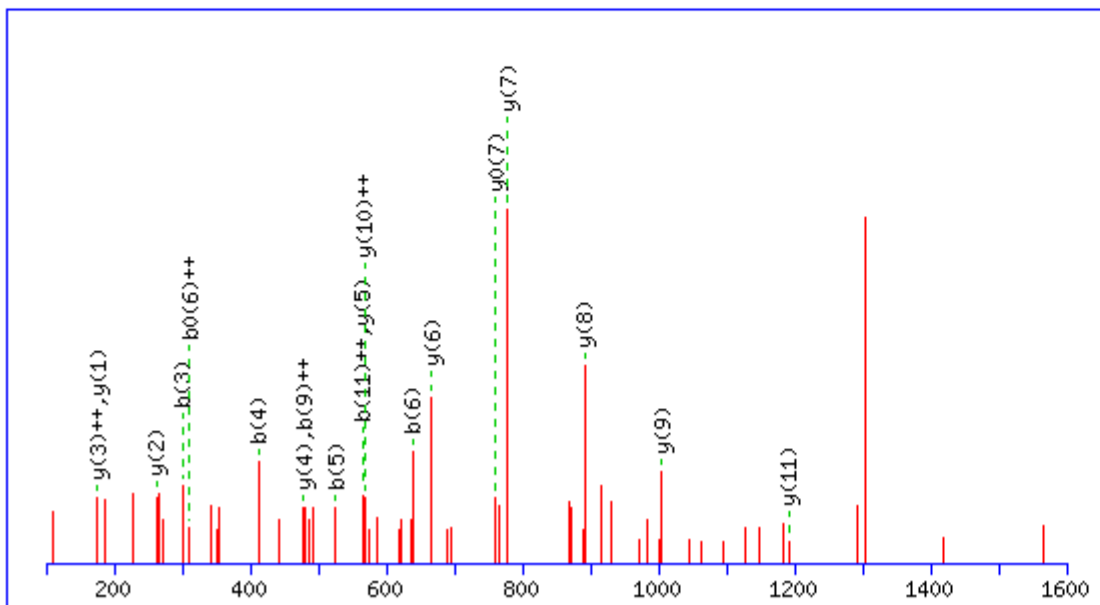

Monoisotopic mass of neutral peptide Mr(calc): 1303.698318

Fixed modifications: Propionamide (C) (apply to specified residues or termini only)

Ions Score: 48 Expect: 0.00014

Matches : 19/104 fragment ions using 42 most intense peaks [\(help\)](#)

| #  | b           | b <sup>++</sup> | b <sup>0</sup> | b <sup>0++</sup> | Seq. | y           | y <sup>++</sup> | y <sup>*</sup> | y <sup>+++</sup> | y <sup>0</sup> | y <sup>0++</sup> | #  |
|----|-------------|-----------------|----------------|------------------|------|-------------|-----------------|----------------|------------------|----------------|------------------|----|
| 1  | 114.091340  | 57.549308       |                |                  | L    |             |                 |                |                  |                |                  | 12 |
| 2  | 171.112804  | 86.060040       |                |                  | G    | 1191.621557 | 596.314417      | 1174.595008    | 587.801142       | 1173.610992    | 587.309134       | 11 |
| 3  | 300.155397  | 150.581336      | 282.144832     | 141.576054       | E    | 1134.600093 | 567.803685      | 1117.573544    | 559.290410       | 1116.589528    | 558.798402       | 10 |
| 4  | 413.239461  | 207.123369      | 395.228896     | 198.118086       | L    | 1005.557500 | 503.282388      | 988.530951     | 494.769114       | 987.546935     | 494.277106       | 9  |
| 5  | 526.323525  | 263.665401      | 508.312960     | 254.660118       | I    | 892.473436  | 446.740356      | 875.446887     | 438.227082       | 874.462871     | 437.735074       | 8  |
| 6  | 639.407589  | 320.207433      | 621.397024     | 311.202150       | L    | 779.389372  | 390.198324      | 762.362823     | 381.685050       | 761.378807     | 381.193042       | 7  |
| 7  | 740.455268  | 370.731272      | 722.444703     | 361.725990       | T    | 666.305308  | 333.656292      | 649.278759     | 325.143018       | 648.294743     | 324.651010       | 6  |
| 8  | 827.487296  | 414.247286      | 809.476731     | 405.242004       | S    | 565.257629  | 283.132453      | 548.231080     | 274.619178       | 547.247064     | 274.127170       | 5  |
| 9  | 956.529889  | 478.768583      | 938.519324     | 469.763300       | E    | 478.225601  | 239.616438      | 461.199052     | 231.103164       | 460.215036     | 230.611156       | 4  |
| 10 | 1043.561917 | 522.284597      | 1025.551352    | 513.279314       | S    | 349.183008  | 175.095142      | 332.156459     | 166.581867       | 331.172443     | 166.089859       | 3  |
| 11 | 1130.593945 | 565.800611      | 1112.583380    | 556.795328       | S    | 262.150980  | 131.579128      | 245.124431     | 123.065854       | 244.140415     | 122.573846       | 2  |
| 12 |             |                 |                |                  | R    | 175.118952  | 88.063114       | 158.092403     | 79.549839        |                |                  | 1  |

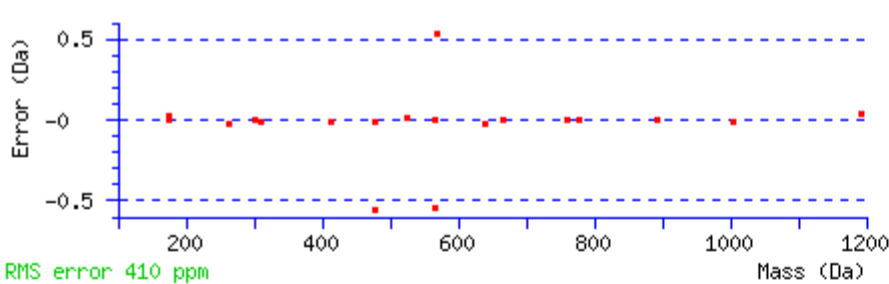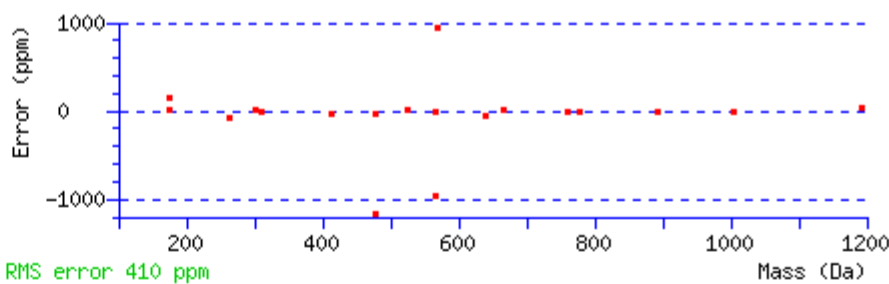

NCBI BLAST search of **LGELILTSESSR**

(Parameters: blastp, nr protein database, expect=20000, no filter, PAM30)

Other BLAST [web gateways](#)

**All matches to this query**

| Score | Mr(calc):   | Delta     | Sequence                     |
|-------|-------------|-----------|------------------------------|
| 48.5  | 1303.698318 | -0.001790 | <a href="#">LGELILTSESSR</a> |
| 22.7  | 1303.688431 | 0.008097  | <a href="#">ISVLEPPQEHR</a>  |
| 14.9  | 1303.703049 | -0.006521 | <a href="#">GRVVNISSMLGR</a> |
| 0.4   | 1303.703033 | -0.006505 | <a href="#">LVLSACGRTAR</a>  |
| 0.4   | 1303.699722 | -0.003194 | <a href="#">VTVPSHTVHGVR</a> |
| 0.0   | 1303.702347 | -0.005819 | <a href="#">IIEPVKYPDK</a>   |

# **MASCOT** Mascot Search Results

## Peptide View

MS/MS Fragmentation of **VPKGPEVK**

Found in **PRAX\_HUMAN**, Periain OS=Homo sapiens GN=PRX PE=1 SV=2

Match to Query 5855: 868.504568 from(435.259560,2+) rtinseconds(847) index(639)

Title: Locus:1.1.1.1642.8

Data file 2011-11-14 - TFD - EP 8-5.mgf

Click mouse within plot area to zoom in by factor of two about that point

Or, Plot from  to  Da

Label all possible matches  Label matches used for scoring

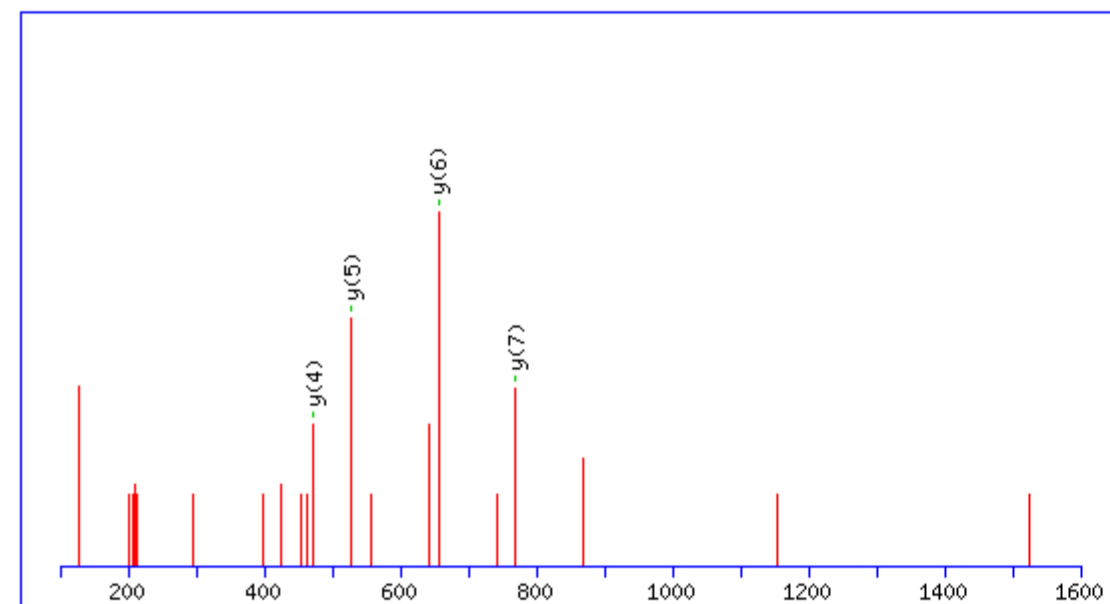

Monoisotopic mass of neutral peptide Mr(calc): 868.501816

Fixed modifications: Propionamide (C) (apply to specified residues or termini only)

Variable modifications:

P2 : Oxidation (P)

Ions Score: 31 Expect: 0.0047

Matches : 4/66 fragment ions using 7 most intense peaks [\(help\)](#)

| # | b          | b <sup>++</sup> | b <sup>*</sup> | b <sup>*++</sup> | b <sup>0</sup> | b <sup>0++</sup> | Seq. | y          | y <sup>++</sup> | y <sup>*</sup> | y <sup>*++</sup> | y <sup>0</sup> | y <sup>0++</sup> | # |
|---|------------|-----------------|----------------|------------------|----------------|------------------|------|------------|-----------------|----------------|------------------|----------------|------------------|---|
| 1 | 100.075690 | 50.541483       |                |                  |                |                  | V    |            |                 |                |                  |                |                  | 8 |
| 2 | 213.123369 | 107.065322      |                |                  |                |                  | P    | 770.440681 | 385.723979      | 753.414132     | 377.210704       | 752.430116     | 376.718696       | 7 |
| 3 | 341.218332 | 171.112804      | 324.191783     | 162.599529       |                |                  | K    | 657.393002 | 329.200139      | 640.366453     | 320.686865       | 639.382437     | 320.194857       | 6 |
| 4 | 398.239796 | 199.623536      | 381.213247     | 191.110261       |                |                  | G    | 529.298039 | 265.152658      | 512.271490     | 256.639383       | 511.287474     | 256.147375       | 5 |
| 5 | 495.292560 | 248.149918      | 478.266011     | 239.636643       |                |                  | P    | 472.276575 | 236.641925      | 455.250026     | 228.128651       | 454.266010     | 227.636643       | 4 |
| 6 | 624.335153 | 312.671215      | 607.308604     | 304.157940       | 606.324588     | 303.665932       | E    | 375.223811 | 188.115543      | 358.197262     | 179.602269       | 357.213246     | 179.110261       | 3 |
| 7 | 723.403567 | 362.205422      | 706.377018     | 353.692147       | 705.393002     | 353.200139       | V    | 246.181218 | 123.594247      | 229.154669     | 115.080972       |                |                  | 2 |
| 8 |            |                 |                |                  |                |                  | K    | 147.112804 | 74.060040       | 130.086255     | 65.546765        |                |                  | 1 |

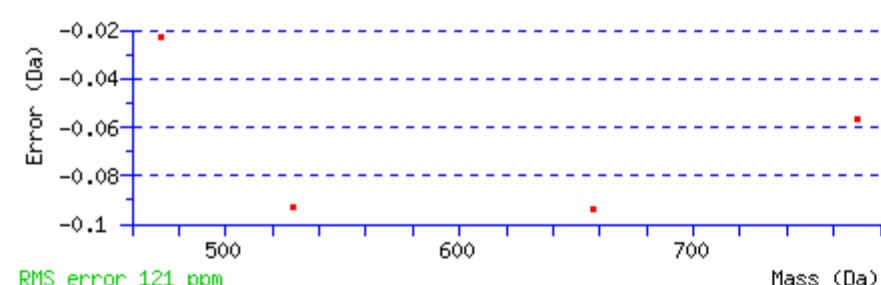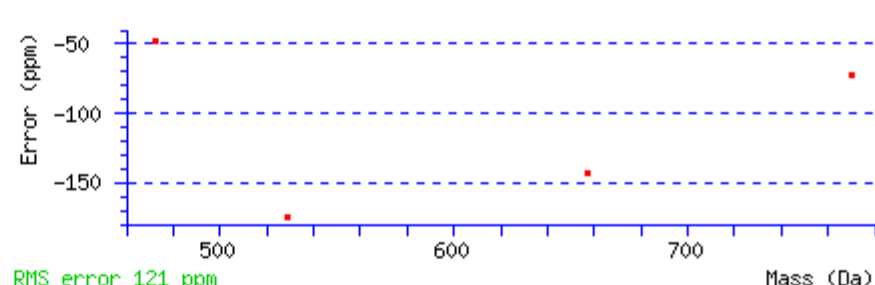

NCBI BLAST search of **VPKGPEVK**

(Parameters: blastp, nr protein database, expect=20000, no filter, PAM30)

Other BLAST [web gateways](#)

## All matches to this query

| Score | Mr(calc):  | Delta     | Sequence                 |
|-------|------------|-----------|--------------------------|
| 31.3  | 868.501816 | 0.002752  | <a href="#">VPKGPEVK</a> |
| 10.7  | 868.513031 | -0.008463 | <a href="#">LNIGPAIR</a> |
| 8.5   | 868.513031 | -0.008463 | <a href="#">VKPREPK</a>  |
| 6.2   | 868.513031 | -0.008463 | <a href="#">DPKQIIR</a>  |
| 5.8   | 868.501801 | 0.002767  | <a href="#">VIPELNGK</a> |
| 5.8   | 868.513046 | -0.008478 | <a href="#">VIRPQPK</a>  |
| 5.8   | 868.501816 | 0.002752  | <a href="#">VITAQPPK</a> |
| 5.8   | 868.501816 | 0.002752  | <a href="#">VITAQPPK</a> |
| 5.8   | 868.513046 | -0.008478 | <a href="#">VLGLQAPR</a> |
| 5.8   | 868.505844 | -0.001276 | <a href="#">VLYVFTK</a>  |

# **MATRIX** SCIENCE Mascot Search Results

## Peptide View

MS/MS Fragmentation of **SLFLDLVELQR**

Found in **ACOX3\_HUMAN**, Peroxisomal acyl-coenzyme A oxidase 3 OS=Homo sapiens GN=ACOX3 PE=1 SV=2

Match to Query 37919: 1331.738688 from(666.876620,2+) rtinseconds(4036) index(59819)

Title: Locus:1.1.1.2914.18

Data file 2011-11-12 - TFD - EP 6-2.mgf

Click mouse within plot area to zoom in by factor of two about that point

Or, Plot from  to  Da

Label all possible matches  Label matches used for scoring

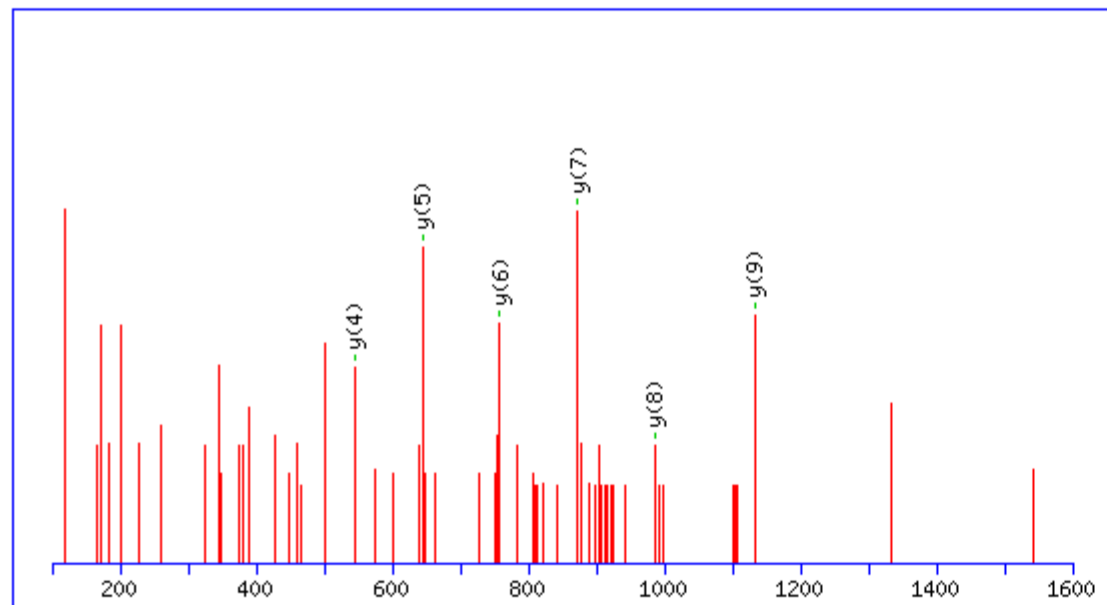

Monoisotopic mass of neutral peptide Mr(calc): 1331.744888

Fixed modifications: Propionamide (C) (apply to specified residues or termini only)

Ions Score: 37 Expect: 0.0015

Matches : 6/96 fragment ions using 11 most intense peaks ([help](#))

| #  | b           | b <sup>++</sup> | b <sup>*</sup> | b <sup>*++</sup> | b <sup>0</sup> | b <sup>0++</sup> | Seq. | y                  | y <sup>++</sup> | y <sup>*</sup> | y <sup>*++</sup> | y <sup>0</sup> | y <sup>0++</sup> | #  |
|----|-------------|-----------------|----------------|------------------|----------------|------------------|------|--------------------|-----------------|----------------|------------------|----------------|------------------|----|
| 1  | 88.039304   | 44.523290       |                |                  | 70.028739      | 35.518008        | S    |                    |                 |                |                  |                |                  | 11 |
| 2  | 201.123368  | 101.065322      |                |                  | 183.112803     | 92.060039        | L    | 1245.720150        | 623.363713      | 1228.693601    | 614.850439       | 1227.709585    | 614.358430       | 10 |
| 3  | 348.191782  | 174.599529      |                |                  | 330.181217     | 165.594246       | F    | <b>1132.636086</b> | 566.821681      | 1115.609537    | 558.308407       | 1114.625521    | 557.816398       | 9  |
| 4  | 461.275846  | 231.141561      |                |                  | 443.265281     | 222.136278       | L    | <b>985.567672</b>  | 493.287474      | 968.541123     | 484.774200       | 967.557107     | 484.282192       | 8  |
| 5  | 576.302789  | 288.655033      |                |                  | 558.292224     | 279.649750       | D    | <b>872.483608</b>  | 436.745442      | 855.457059     | 428.232168       | 854.473043     | 427.740160       | 7  |
| 6  | 689.386853  | 345.197065      |                |                  | 671.376288     | 336.191782       | L    | <b>757.456665</b>  | 379.231971      | 740.430116     | 370.718696       | 739.446100     | 370.226688       | 6  |
| 7  | 788.455267  | 394.731271      |                |                  | 770.444702     | 385.725989       | V    | <b>644.372601</b>  | 322.689939      | 627.346052     | 314.176664       | 626.362036     | 313.684656       | 5  |
| 8  | 917.497860  | 459.252568      |                |                  | 899.487295     | 450.247285       | E    | <b>545.304187</b>  | 273.155732      | 528.277638     | 264.642457       | 527.293622     | 264.150449       | 4  |
| 9  | 1030.581924 | 515.794600      |                |                  | 1012.571359    | 506.789317       | L    | 416.261594         | 208.634435      | 399.235045     | 200.121160       |                |                  | 3  |
| 10 | 1158.640502 | 579.823889      | 1141.613953    | 571.310615       | 1140.629937    | 570.818606       | Q    | 303.177530         | 152.092403      | 286.150981     | 143.579129       |                |                  | 2  |
| 11 |             |                 |                |                  |                |                  | R    | 175.118952         | 88.063114       | 158.092403     | 79.549839        |                |                  | 1  |

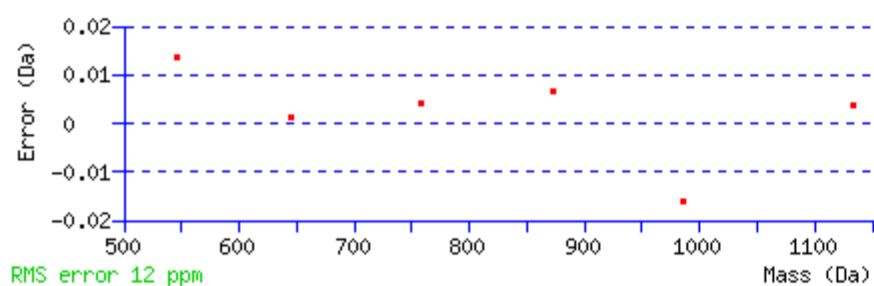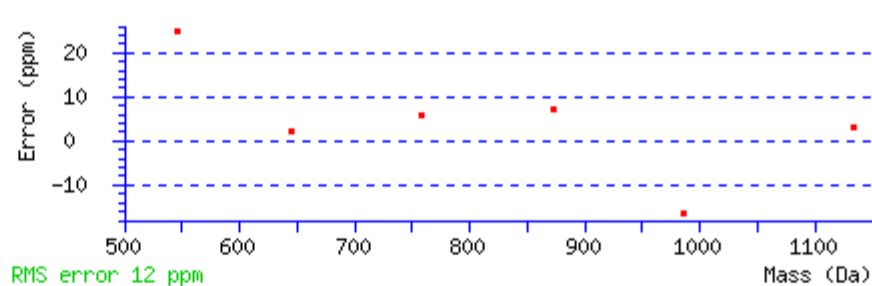

NCBI BLAST search of **SLFLDLVELQR**

(Parameters: blastp, nr protein database, expect=20000, no filter, PAM30)

Other BLAST [web gateways](#)

All matches to this query

| Score | Mr(calc):   | Delta     | Sequence                    |
|-------|-------------|-----------|-----------------------------|
| 36.5  | 1331.744888 | -0.006200 | <a href="#">SLFLDLVELQR</a> |

Mascot: <http://www.matrixscience.com/>

# Mascot Search Results

## Peptide View

MS/MS Fragmentation of **LGNSADALESAK**

Found in **PX11B\_HUMAN**, Peroxisomal membrane protein 11B OS=Homo sapiens GN=PEX11B PE=1 SV=1

Match to Query 27048: 1174.584668 from(588.299610,2+) rtinseconds(1502) index(8951)

Title: Locus:1.1.1.2157.35

Data file 2011-11-12 - TFD - EP 5-5.mgf

Click mouse within plot area to zoom in by factor of two about that point

Or, Plot from  to  Da

Label all possible matches  Label matches used for scoring

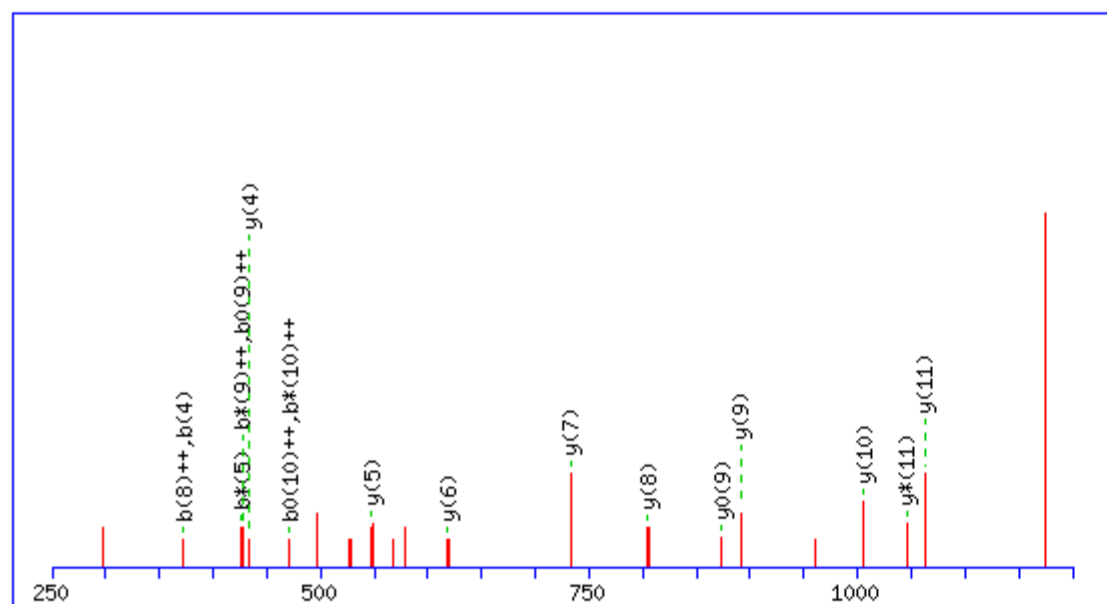

Monoisotopic mass of neutral peptide Mr(calc): 1174.582947

Fixed modifications: Propionamide (C) (apply to specified residues or termini only)

Ions Score: 55 Expect: 4.1e-005

Matches : 17/118 fragment ions using 21 most intense peaks ([help](#))

| #  | b           | b <sup>++</sup> | b <sup>*</sup> | b <sup>*++</sup> | b <sup>0</sup> | b <sup>0++</sup> | Seq. | y           | y <sup>++</sup> | y <sup>*</sup> | y <sup>*++</sup> | y <sup>0</sup> | y <sup>0++</sup> | #  |
|----|-------------|-----------------|----------------|------------------|----------------|------------------|------|-------------|-----------------|----------------|------------------|----------------|------------------|----|
| 1  | 114.091340  | 57.549308       |                |                  |                |                  | L    |             |                 |                |                  |                |                  | 12 |
| 2  | 171.112804  | 86.060040       |                |                  |                |                  | G    | 1062.506193 | 531.756735      | 1045.479644    | 523.243460       | 1044.495628    | 522.751452       | 11 |
| 3  | 285.155731  | 143.081504      | 268.129182     | 134.568229       |                |                  | N    | 1005.484729 | 503.246003      | 988.458180     | 494.732728       | 987.474164     | 494.240720       | 10 |
| 4  | 372.187759  | 186.597517      | 355.161210     | 178.084243       | 354.177194     | 177.592235       | S    | 891.441802  | 446.224539      | 874.415253     | 437.711265       | 873.431237     | 437.219257       | 9  |
| 5  | 443.224873  | 222.116074      | 426.198324     | 213.602800       | 425.214308     | 213.110792       | A    | 804.409774  | 402.708525      | 787.383225     | 394.195251       | 786.399209     | 393.703243       | 8  |
| 6  | 558.251816  | 279.629546      | 541.225267     | 271.116271       | 540.241251     | 270.624263       | D    | 733.372660  | 367.189968      | 716.346111     | 358.676694       | 715.362095     | 358.184686       | 7  |
| 7  | 629.288930  | 315.148103      | 612.262381     | 306.634828       | 611.278365     | 306.142820       | A    | 618.345717  | 309.676497      | 601.319168     | 301.163222       | 600.335152     | 300.671214       | 6  |
| 8  | 742.372994  | 371.690135      | 725.346445     | 363.176860       | 724.362429     | 362.684852       | L    | 547.308603  | 274.157940      | 530.282054     | 265.644665       | 529.298038     | 265.152657       | 5  |
| 9  | 871.415587  | 436.211432      | 854.389038     | 427.698157       | 853.405022     | 427.206149       | E    | 434.224539  | 217.615908      | 417.197990     | 209.102633       | 416.213974     | 208.610625       | 4  |
| 10 | 958.447615  | 479.727445      | 941.421066     | 471.214171       | 940.437050     | 470.722163       | S    | 305.181946  | 153.094611      | 288.155397     | 144.581337       | 287.171381     | 144.089329       | 3  |
| 11 | 1029.484729 | 515.246003      | 1012.458180    | 506.732728       | 1011.474164    | 506.240720       | A    | 218.149918  | 109.578597      | 201.123369     | 101.065323       |                |                  | 2  |
| 12 |             |                 |                |                  |                |                  | K    | 147.112804  | 74.060040       | 130.086255     | 65.546765        |                |                  | 1  |

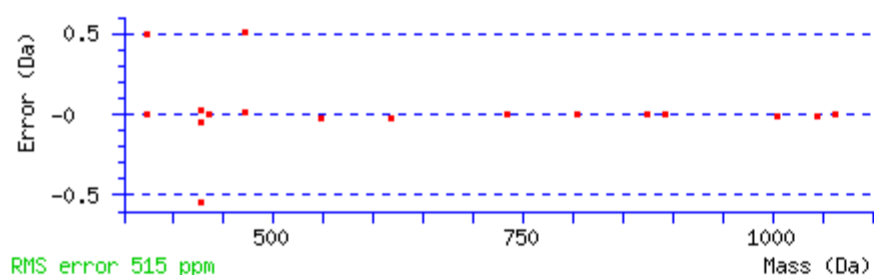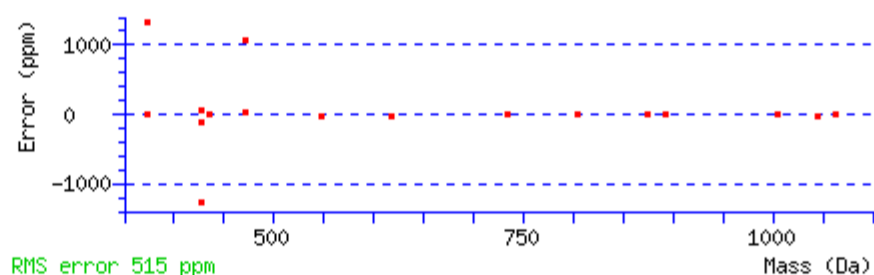

NCBI BLAST search of **LGNSADALESAK**

(Parameters: blastp, nr protein database, expect=20000, no filter, PAM30)

Other BLAST [web gateways](#)

All matches to this query

| Score | Mr(calc):   | Delta    | Sequence                     |
|-------|-------------|----------|------------------------------|
| 55.1  | 1174.582947 | 0.001721 | <a href="#">LGNSADALESAK</a> |
| 19.8  | 1174.576431 | 0.008237 | <a href="#">LGSNAGNKPKCK</a> |

# Mascot Search Results

## Peptide View

MS/MS Fragmentation of **DTPTSAGPNSFNK**

Found in **PCNP\_HUMAN**, PEST proteolytic signal-containing nuclear protein OS=Homo sapiens GN=PCNP PE=1 SV=2

Match to Query 34281: 1334.607608 from(668.311080,2+) rtinseconds(1412) index(5048)

Title: Locus:1.1.1.1994.40

Data file 2011-11-10 - TFD - EP 4-7.mgf

Click mouse within plot area to zoom in by factor of two about that point

Or, Plot from  to  Da

Label all possible matches  Label matches used for scoring

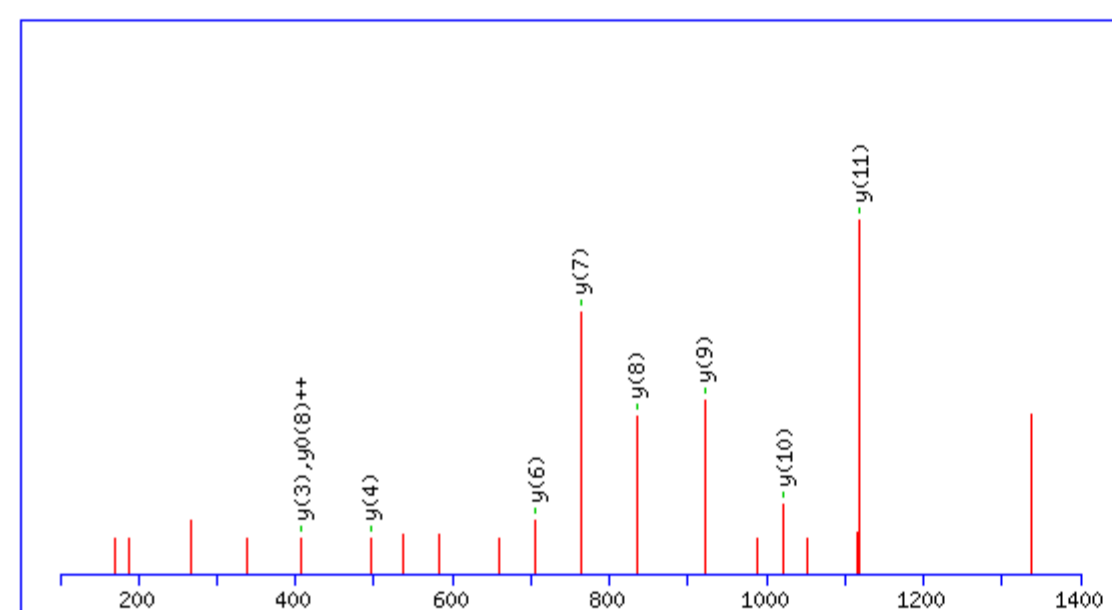

Monoisotopic mass of neutral peptide Mr(calc): 1334.610260

Fixed modifications: Propionamide (C) (apply to specified residues or termini only)

Ions Score: 59 Expect: 2.7e-006

Matches: 9/122 fragment ions using 16 most intense peaks ([help](#))

| #  | b           | b <sup>++</sup> | b <sup>*</sup> | b <sup>*++</sup> | b <sup>0</sup> | b <sup>0++</sup> | Seq. | y                  | y <sup>++</sup> | y <sup>*</sup> | y <sup>*++</sup> | y <sup>0</sup> | y <sup>0++</sup>  | #  |
|----|-------------|-----------------|----------------|------------------|----------------|------------------|------|--------------------|-----------------|----------------|------------------|----------------|-------------------|----|
| 1  | 116.034219  | 58.520748       |                |                  | 98.023654      | 49.515465        | D    |                    |                 |                |                  |                |                   | 13 |
| 2  | 217.081898  | 109.044587      |                |                  | 199.071333     | 100.039304       | T    | 1220.590592        | 610.798934      | 1203.564043    | 602.285660       | 1202.580027    | 601.793652        | 12 |
| 3  | 314.134662  | 157.570969      |                |                  | 296.124097     | 148.565687       | P    | <b>1119.542913</b> | 560.275095      | 1102.516364    | 551.761820       | 1101.532348    | 551.269812        | 11 |
| 4  | 415.182341  | 208.094809      |                |                  | 397.171776     | 199.089526       | T    | <b>1022.490149</b> | 511.748713      | 1005.463600    | 503.235438       | 1004.479584    | 502.743430        | 10 |
| 5  | 502.214369  | 251.610822      |                |                  | 484.203804     | 242.605540       | S    | <b>921.442470</b>  | 461.224873      | 904.415921     | 452.711599       | 903.431905     | 452.219591        | 9  |
| 6  | 573.251483  | 287.129380      |                |                  | 555.240918     | 278.124097       | A    | <b>834.410442</b>  | 417.708859      | 817.383893     | 409.195585       | 816.399877     | <b>408.703577</b> | 8  |
| 7  | 630.272947  | 315.640112      |                |                  | 612.262382     | 306.634829       | G    | <b>763.373328</b>  | 382.190302      | 746.346779     | 373.677028       | 745.362763     | 373.185020        | 7  |
| 8  | 727.325711  | 364.166494      |                |                  | 709.315146     | 355.161211       | P    | <b>706.351864</b>  | 353.679570      | 689.325315     | 345.166296       | 688.341299     | 344.674288        | 6  |
| 9  | 841.368638  | 421.187957      | 824.342089     | 412.674683       | 823.358073     | 412.182675       | N    | 609.299100         | 305.153188      | 592.272551     | 296.639914       | 591.288535     | 296.147906        | 5  |
| 10 | 928.400666  | 464.703971      | 911.374117     | 456.190697       | 910.390101     | 455.698689       | S    | <b>495.256173</b>  | 248.131724      | 478.229624     | 239.618450       | 477.245608     | 239.126442        | 4  |
| 11 | 1075.469080 | 538.238178      | 1058.442531    | 529.724904       | 1057.458515    | 529.232896       | F    | <b>408.224145</b>  | 204.615711      | 391.197596     | 196.102436       |                |                   | 3  |
| 12 | 1189.512007 | 595.259642      | 1172.485458    | 586.746367       | 1171.501442    | 586.254359       | N    | 261.155731         | 131.081503      | 244.129182     | 122.568229       |                |                   | 2  |
| 13 |             |                 |                |                  |                |                  | K    | 147.112804         | 74.060040       | 130.086255     | 65.546765        |                |                   | 1  |

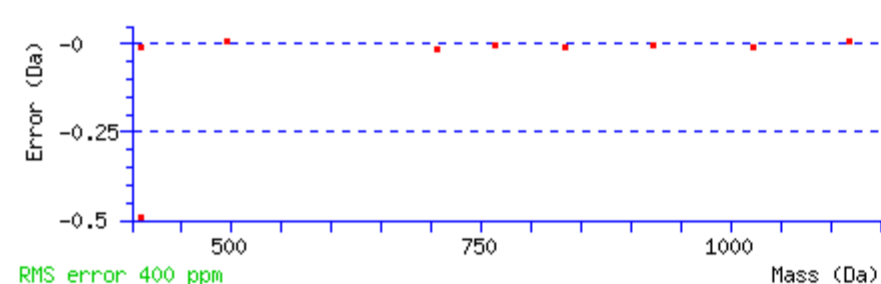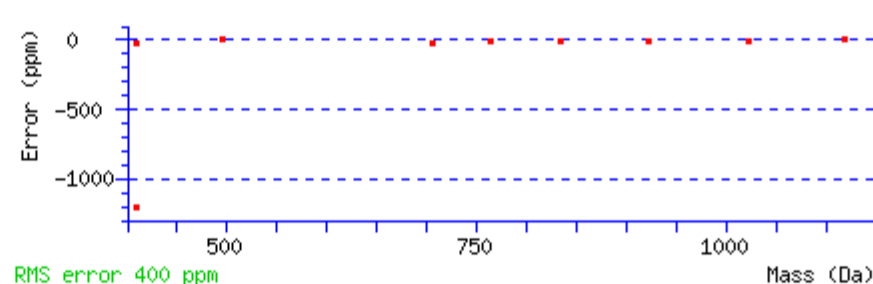

NCBI BLAST search of [DTPTSAGPNSFNK](#)

(Parameters: blastp, nr protein database, expect=20000, no filter, PAM30)

Other BLAST [web gateways](#)

All matches to this query

| Score | Mr(calc):   | Delta     | Sequence                      |
|-------|-------------|-----------|-------------------------------|
| 59.4  | 1334.610260 | -0.002652 | <a href="#">DTPTSAGPNSFNK</a> |
| 0.0   | 1334.611099 | -0.003491 | <a href="#">SEPCLMDWRK</a>    |

Mascot: <http://www.matrixscience.com/>

**Peptide View**

MS/MS Fragmentation of **LGLDYSYDLAPR**

Found in **PLBL1\_HUMAN**, Phospholipase B-like 1 OS=Homo sapiens GN=PLBD1 PE=1 SV=2

Match to Query 40967: 1381.693468 from(691.854010,2+) rtinseconds(2902) index(40026)

Title: Locus:1.1.1.2400.36

Data file 2011-11-12 - TFD - EP 6-4.mgf

Click mouse within plot area to zoom in by factor of two about that point

Or, Plot from  to  Da

Label all possible matches  Label matches used for scoring

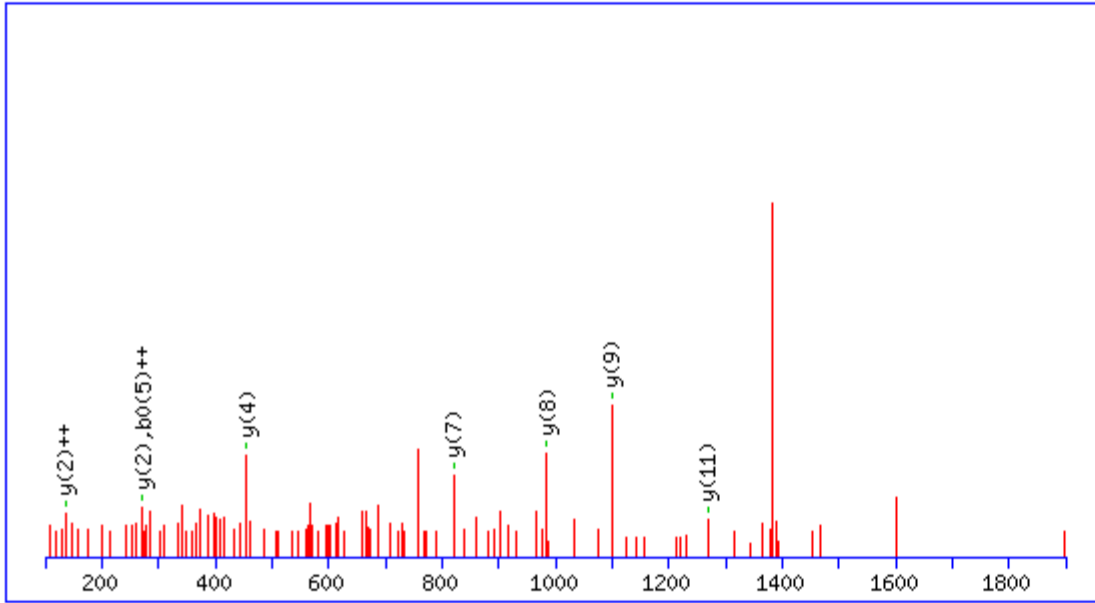

Monoisotopic mass of neutral peptide Mr(calc): 1381.687759

Fixed modifications: Propionamide (C) (apply to specified residues or termini only)

Ions Score: 33 Expect: 0.0013

Matches : 8/96 fragment ions using 13 most intense peaks [\(help\)](#)

| #  | b           | b <sup>++</sup> | b <sup>0</sup> | b <sup>0++</sup> | Seq. | y           | y <sup>++</sup> | y <sup>*</sup> | y <sup>*++</sup> | y <sup>0</sup> | y <sup>0++</sup> | #  |
|----|-------------|-----------------|----------------|------------------|------|-------------|-----------------|----------------|------------------|----------------|------------------|----|
| 1  | 114.091340  | 57.549308       |                |                  | L    |             |                 |                |                  |                |                  | 12 |
| 2  | 171.112804  | 86.060040       |                |                  | G    | 1269.610994 | 635.309135      | 1252.584445    | 626.795861       | 1251.600429    | 626.303853       | 11 |
| 3  | 284.196868  | 142.602072      |                |                  | L    | 1212.589530 | 606.798403      | 1195.562981    | 598.285129       | 1194.578965    | 597.793120       | 10 |
| 4  | 399.223811  | 200.115544      | 381.213246     | 191.110261       | D    | 1099.505466 | 550.256371      | 1082.478917    | 541.743097       | 1081.494901    | 541.251089       | 9  |
| 5  | 562.287140  | 281.647208      | 544.276575     | 272.641926       | Y    | 984.478523  | 492.742900      | 967.451974     | 484.229625       | 966.467958     | 483.737617       | 8  |
| 6  | 649.319168  | 325.163222      | 631.308603     | 316.157940       | S    | 821.415194  | 411.211235      | 804.388645     | 402.697960       | 803.404629     | 402.205952       | 7  |
| 7  | 812.382497  | 406.694887      | 794.371932     | 397.689604       | Y    | 734.383166  | 367.695221      | 717.356617     | 359.181946       | 716.372601     | 358.689938       | 6  |
| 8  | 927.409440  | 464.208358      | 909.398875     | 455.203076       | D    | 571.319837  | 286.163557      | 554.293288     | 277.650282       | 553.309272     | 277.158274       | 5  |
| 9  | 1040.493504 | 520.750390      | 1022.482939    | 511.745108       | L    | 456.292894  | 228.650085      | 439.266345     | 220.136810       |                |                  | 4  |
| 10 | 1111.530618 | 556.268947      | 1093.520053    | 547.263665       | A    | 343.208830  | 172.108053      | 326.182281     | 163.594778       |                |                  | 3  |
| 11 | 1208.583382 | 604.795329      | 1190.572817    | 595.790047       | P    | 272.171716  | 136.589496      | 255.145167     | 128.076221       |                |                  | 2  |
| 12 |             |                 |                |                  | R    | 175.118952  | 88.063114       | 158.092403     | 79.549839        |                |                  | 1  |

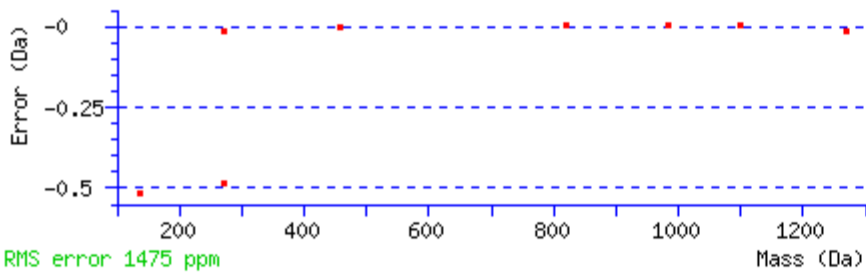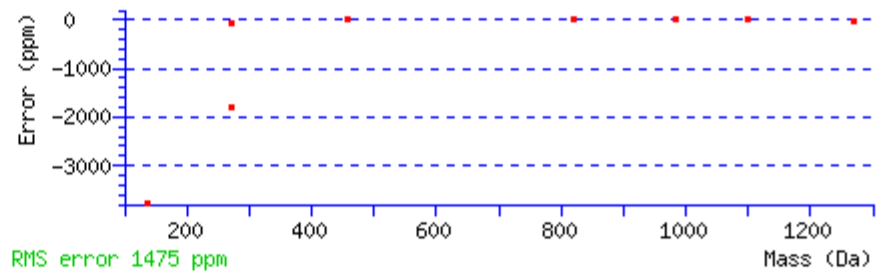

NCBI BLAST search of **LGLDYSYDLAPR**

(Parameters: blastp, nr protein database, expect=20000, no filter, PAM30)

Other BLAST [web gateways](#)

All matches to this query

| Score | Mr(calc):   | Delta     | Sequence                      |
|-------|-------------|-----------|-------------------------------|
| 33.3  | 1381.687759 | 0.005709  | <a href="#">LGLDYSYDLAPR</a>  |
| 2.5   | 1381.702393 | -0.008925 | <a href="#">VAPGTPADLCVPR</a> |
| 1.9   | 1381.687759 | 0.005709  | <a href="#">REPSYFEIPTK</a>   |



# MASCOT Search Results

## Peptide View

MS/MS Fragmentation of **LNIPATNVFANR**

Found in **SERB\_HUMAN**, Phosphoserine phosphatase OS=Homo sapiens GN=PSPH PE=1 SV=2

Match to Query 37616: 1328.714648 from(665.364600,2+) rtinseconds(2824) index(36617)

Title: Locus:1.1.1.2389.36

Data file 2011-11-10 - TFD - EP 4-5.mgf

Click mouse within plot area to zoom in by factor of two about that point

Or, Plot from  to  Da

Label all possible matches  Label matches used for scoring

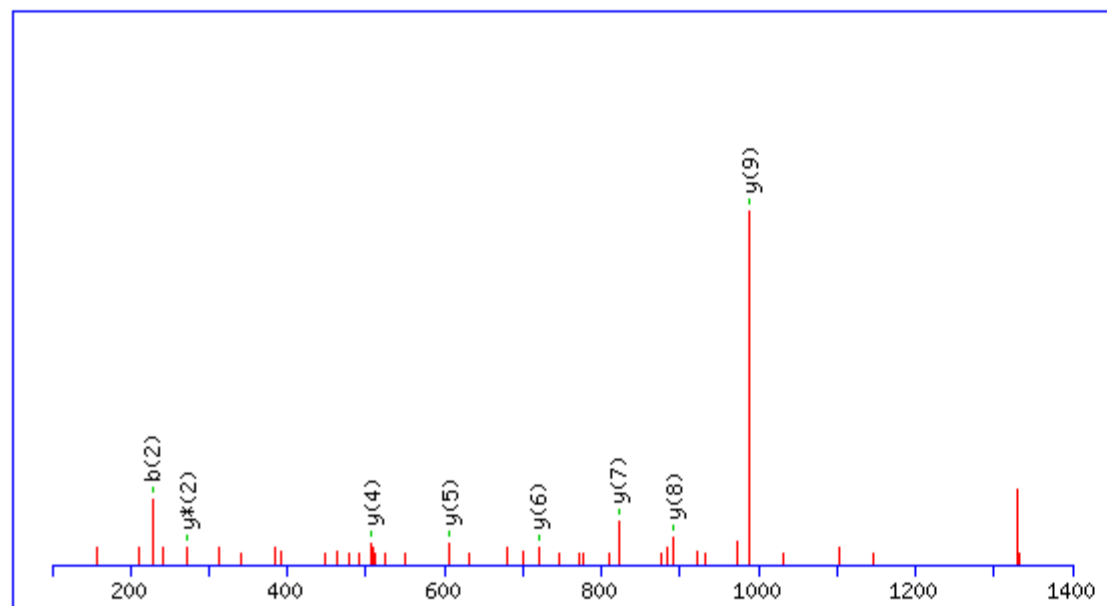

Monoisotopic mass of neutral peptide  $M_r(\text{calc})$ : 1328.720062

Fixed modifications: Propionamide (C) (apply to specified residues or termini only)

Ions Score: 47 Expect: 0.00013

Matches : 8/108 fragment ions using 10 most intense peaks [\(help\)](#)

| #  | b                 | b <sup>++</sup> | b <sup>*</sup> | b <sup>*++</sup> | b <sup>0</sup> | b <sup>0++</sup> | Seq. | y                 | y <sup>++</sup> | y <sup>*</sup>    | y <sup>*++</sup> | y <sup>0</sup> | y <sup>0++</sup> | #  |
|----|-------------------|-----------------|----------------|------------------|----------------|------------------|------|-------------------|-----------------|-------------------|------------------|----------------|------------------|----|
| 1  | 114.091340        | 57.549308       |                |                  |                |                  | L    |                   |                 |                   |                  |                |                  | 12 |
| 2  | <b>228.134267</b> | 114.570771      | 211.107718     | 106.057497       |                |                  | N    | 1216.643296       | 608.825286      | 1199.616747       | 600.312012       | 1198.632731    | 599.820003       | 11 |
| 3  | 341.218331        | 171.112803      | 324.191782     | 162.599529       |                |                  | I    | 1102.600369       | 551.803822      | 1085.573820       | 543.290548       | 1084.589804    | 542.798540       | 10 |
| 4  | 438.271095        | 219.639186      | 421.244546     | 211.125911       |                |                  | P    | <b>989.516305</b> | 495.261790      | 972.489756        | 486.748516       | 971.505740     | 486.256508       | 9  |
| 5  | 509.308209        | 255.157742      | 492.281660     | 246.644468       |                |                  | A    | <b>892.463541</b> | 446.735408      | 875.436992        | 438.222134       | 874.452976     | 437.730126       | 8  |
| 6  | 610.355888        | 305.681582      | 593.329339     | 297.168308       | 592.345323     | 296.676300       | T    | <b>821.426427</b> | 411.216851      | 804.399878        | 402.703577       | 803.415862     | 402.211569       | 7  |
| 7  | 724.398815        | 362.703046      | 707.372266     | 354.189771       | 706.388250     | 353.697763       | N    | <b>720.378748</b> | 360.693012      | 703.352199        | 352.179737       |                |                  | 6  |
| 8  | 823.467229        | 412.237253      | 806.440680     | 403.723978       | 805.456664     | 403.231970       | V    | <b>606.335821</b> | 303.671548      | 589.309272        | 295.158274       |                |                  | 5  |
| 9  | 970.535643        | 485.771459      | 953.509094     | 477.258185       | 952.525078     | 476.766177       | F    | <b>507.267407</b> | 254.137341      | 490.240858        | 245.624067       |                |                  | 4  |
| 10 | 1041.572757       | 521.290016      | 1024.546208    | 512.776742       | 1023.562192    | 512.284734       | A    | 360.198993        | 180.603134      | 343.172444        | 172.089860       |                |                  | 3  |
| 11 | 1155.615684       | 578.311480      | 1138.589135    | 569.798205       | 1137.605119    | 569.306197       | N    | 289.161879        | 145.084577      | <b>272.135330</b> | 136.571303       |                |                  | 2  |
| 12 |                   |                 |                |                  |                |                  | R    | 175.118952        | 88.063114       | 158.092403        | 79.549839        |                |                  | 1  |

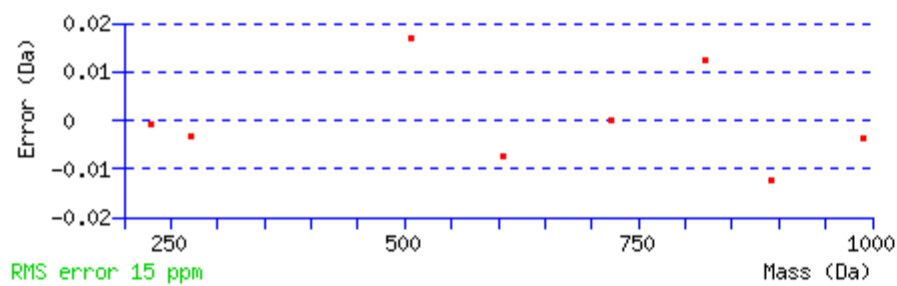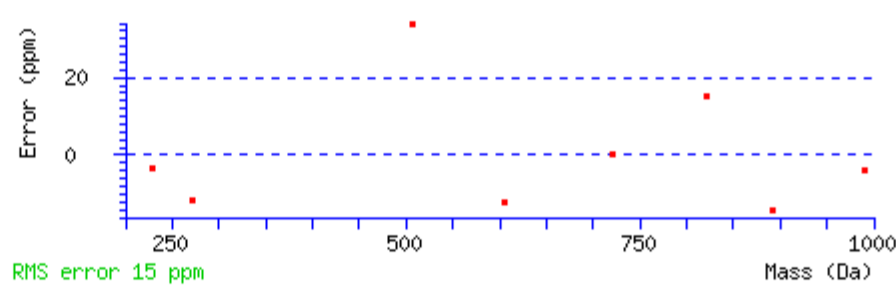

NCBI BLAST search of **LNIPATNVFANR**

(Parameters: blastp, nr protein database, expect=20000, no filter, PAM30)

Other BLAST [web gateways](#)

All matches to this query

| Score | $M_r(\text{calc})$ : | Delta     | Sequence                     |
|-------|----------------------|-----------|------------------------------|
| 47.4  | 1328.720062          | -0.005414 | <a href="#">LNIPATNVFANR</a> |
| 2.6   | 1328.705688          | 0.008960  | <a href="#">GPLGLRLMMPGR</a> |
| 2.6   | 1328.705688          | 0.008960  | <a href="#">GPLGLRLMMPGR</a> |
| 2.1   | 1328.705688          | 0.008960  | <a href="#">GPLGLRLMMPGR</a> |



# MASCOT Search Results

## Peptide View

MS/MS Fragmentation of **VVVLGLLPR**

Found in **PA1B3\_HUMAN**, Platelet-activating factor acetylhydrolase IB subunit gamma OS=Homo sapiens GN=PAFAH1B3 PE=1 SV=1

Match to Query 7729: 964.641808 from(483.328180,2+) rtinseconds(2988) index(41175)

Title: Locus:1.1.1.1579.5

Data file 2012-01-27 - TFD - Epitel - IEC - 10ul - 3.mgf

Click mouse within plot area to zoom in by factor of two about that point

Or, Plot from  to  Da

Label all possible matches  Label matches used for scoring

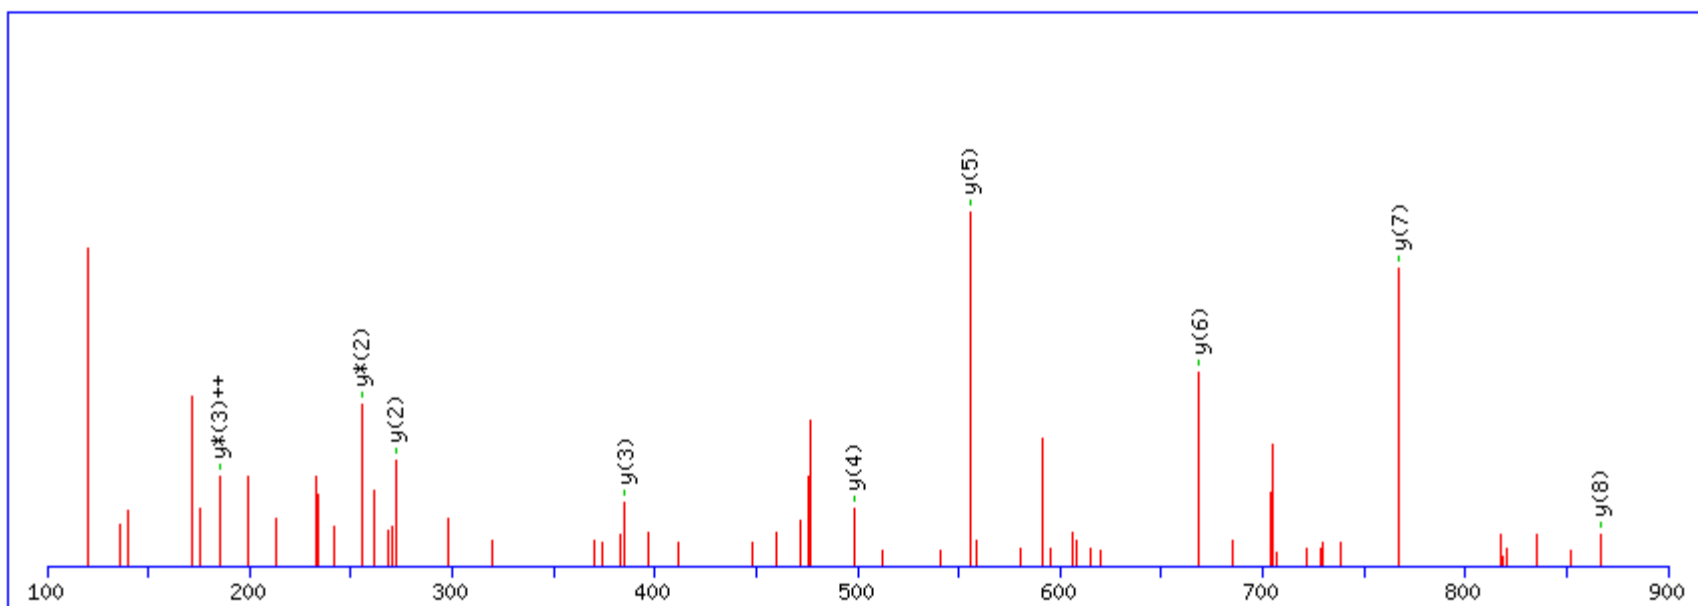

Monoisotopic mass of neutral peptide Mr(calc): 964.643341

Fixed modifications: Carbamidomethyl (C) (apply to specified residues or termini only)

Ions Score: 39 Expect: 0.00011

Matches : 9/48 fragment ions using 24 most intense peaks [\(help\)](#)

| # | b          | b <sup>++</sup> | Seq. | y                 | y <sup>++</sup> | y <sup>*</sup>    | y <sup>*++</sup>  | # |
|---|------------|-----------------|------|-------------------|-----------------|-------------------|-------------------|---|
| 1 | 100.075690 | 50.541483       | V    |                   |                 |                   |                   | 9 |
| 2 | 199.144104 | 100.075690      | V    | <b>866.582200</b> | 433.794738      | 849.555651        | 425.281464        | 8 |
| 3 | 298.212518 | 149.609897      | V    | <b>767.513786</b> | 384.260531      | 750.487237        | 375.747257        | 7 |
| 4 | 411.296582 | 206.151929      | L    | <b>668.445372</b> | 334.726324      | 651.418823        | 326.213050        | 6 |
| 5 | 468.318046 | 234.662661      | G    | <b>555.361308</b> | 278.184292      | 538.334759        | 269.671018        | 5 |
| 6 | 581.402110 | 291.204693      | L    | <b>498.339844</b> | 249.673560      | 481.313295        | 241.160286        | 4 |
| 7 | 694.486174 | 347.746725      | L    | <b>385.255780</b> | 193.131528      | 368.229231        | <b>184.618254</b> | 3 |
| 8 | 791.538938 | 396.273107      | P    | <b>272.171716</b> | 136.589496      | <b>255.145167</b> | 128.076222        | 2 |
| 9 |            |                 | R    | 175.118952        | 88.063114       | 158.092403        | 79.549840         | 1 |

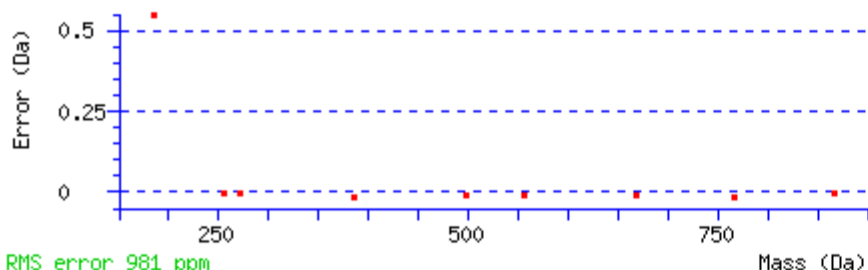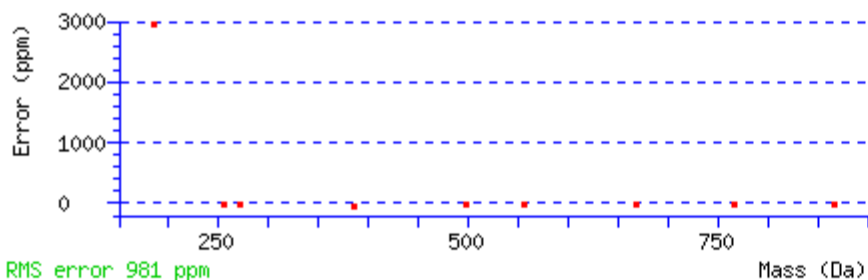

NCBI BLAST search of [VVVLGLLPR](#)

(Parameters: blastp, nr protein database, expect=20000, no filter, PAM30)

Other BLAST [web gateways](#)

## All matches to this query

| Score | Mr(calc):  | Delta     | Sequence                  |
|-------|------------|-----------|---------------------------|
| 39.5  | 964.643341 | -0.001533 | <a href="#">VVVLGLLPR</a> |

# **MASCOT** Mascot Search Results

## Peptide View

MS/MS Fragmentation of **SPVDVLQIFR**

Found in **PARP4\_HUMAN**, Poly [ADP-ribose] polymerase 4 OS=Homo sapiens GN=PARP4 PE=1 SV=3

Match to Query 27633: 1172.646448 from(587.330500,2+) rtinseconds(3688) index(54293)

Title: Locus:1.1.1.2706.4

Data file 2011-11-12 - TFD - EP 6-1.mgf

Click mouse within plot area to zoom in by factor of two about that point

Or, Plot from  to  Da

Label all possible matches  Label matches used for scoring

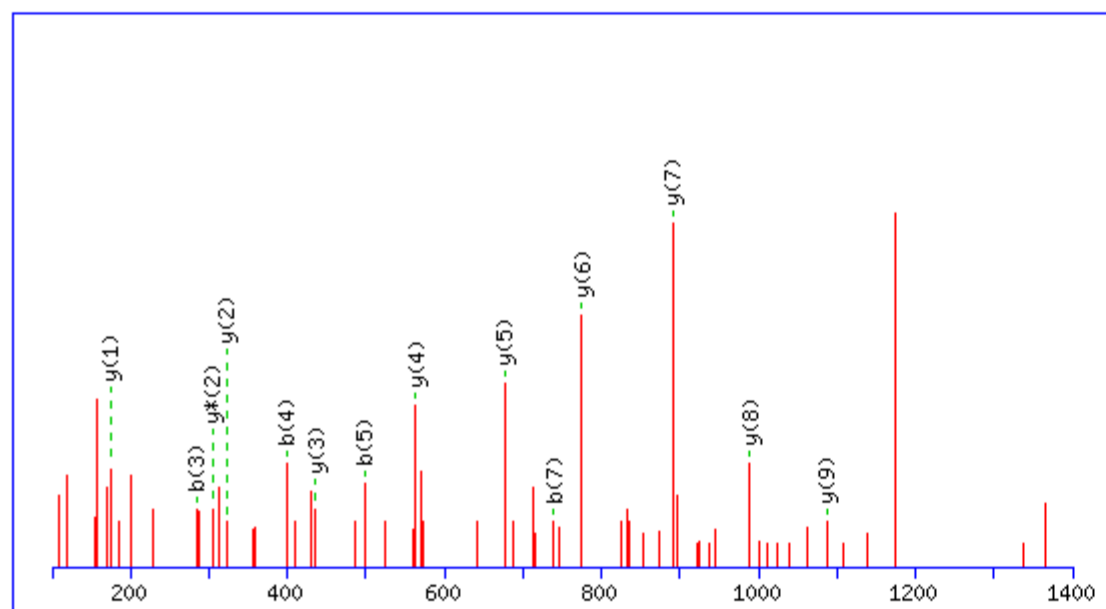

Monoisotopic mass of neutral peptide Mr(calc): 1172.655365

Fixed modifications: Propionamide (C) (apply to specified residues or termini only)

Ions Score: 63 Expect: 9.4e-006

Matches : 14/84 fragment ions using 31 most intense peaks [\(help\)](#)

| #  | b          | b <sup>++</sup> | b <sup>*</sup> | b <sup>*++</sup> | b <sup>0</sup> | b <sup>0++</sup> | Seq. | y           | y <sup>++</sup> | y <sup>*</sup> | y <sup>*++</sup> | y <sup>0</sup> | y <sup>0++</sup> | #  |
|----|------------|-----------------|----------------|------------------|----------------|------------------|------|-------------|-----------------|----------------|------------------|----------------|------------------|----|
| 1  | 88.039304  | 44.523290       |                |                  | 70.028739      | 35.518008        | S    |             |                 |                |                  |                |                  | 10 |
| 2  | 185.092068 | 93.049672       |                |                  | 167.081503     | 84.044389        | P    | 1086.630607 | 543.818942      | 1069.604058    | 535.305667       | 1068.620042    | 534.813659       | 9  |
| 3  | 284.160482 | 142.583879      |                |                  | 266.149917     | 133.578597       | V    | 989.577843  | 495.292560      | 972.551294     | 486.779285       | 971.567278     | 486.287277       | 8  |
| 4  | 399.187425 | 200.097351      |                |                  | 381.176860     | 191.092068       | D    | 890.509429  | 445.758353      | 873.482880     | 437.245078       | 872.498864     | 436.753070       | 7  |
| 5  | 498.255839 | 249.631558      |                |                  | 480.245274     | 240.626275       | V    | 775.482486  | 388.244881      | 758.455937     | 379.731607       |                |                  | 6  |
| 6  | 611.339903 | 306.173590      |                |                  | 593.329338     | 297.168307       | L    | 676.414072  | 338.710674      | 659.387523     | 330.197400       |                |                  | 5  |
| 7  | 739.398481 | 370.202879      | 722.371932     | 361.689604       | 721.387916     | 361.197596       | Q    | 563.330008  | 282.168642      | 546.303459     | 273.655368       |                |                  | 4  |
| 8  | 852.482545 | 426.744911      | 835.455996     | 418.231636       | 834.471980     | 417.739628       | I    | 435.271430  | 218.139353      | 418.244881     | 209.626079       |                |                  | 3  |
| 9  | 999.550959 | 500.279118      | 982.524410     | 491.765843       | 981.540394     | 491.273835       | F    | 322.187366  | 161.597321      | 305.160817     | 153.084047       |                |                  | 2  |
| 10 |            |                 |                |                  |                |                  | R    | 175.118952  | 88.063114       | 158.092403     | 79.549840        |                |                  | 1  |

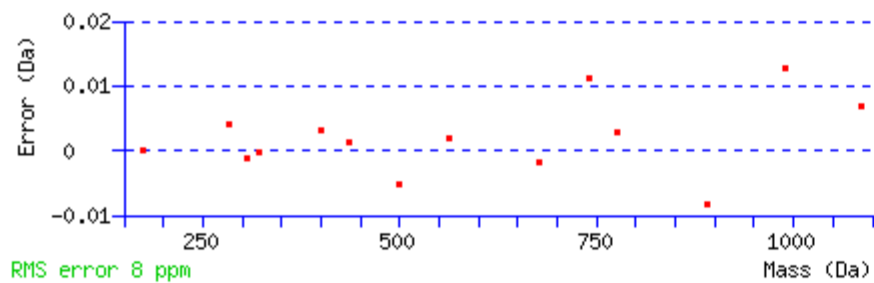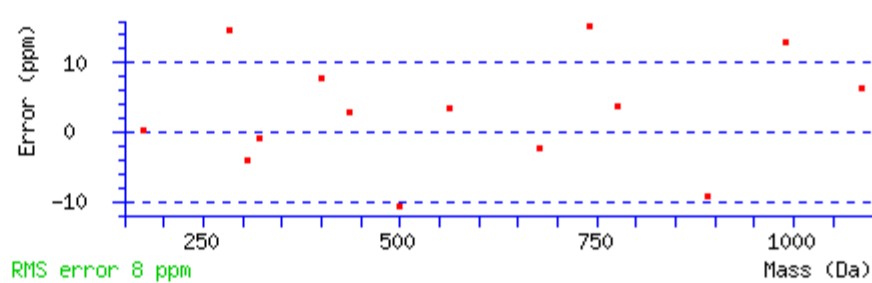

NCBI BLAST search of [SPVDVLQIFR](#)

(Parameters: blastp, nr protein database, expect=20000, no filter, PAM30)

Other BLAST [web gateways](#)

## All matches to this query

| Score | Mr(calc):   | Delta     | Sequence                    |
|-------|-------------|-----------|-----------------------------|
| 62.9  | 1172.655365 | -0.008917 | <a href="#">SPVDVLQIFR</a>  |
| 3.0   | 1172.651321 | -0.004873 | <a href="#">AIITDSVKNGR</a> |
| 1.0   | 1172.651321 | -0.004873 | <a href="#">RIDISPSTLR</a>  |

# MASCOT Search Results

## Peptide View

MS/MS Fragmentation of **IGELLDQASVTR**

Found in **ARHL2\_HUMAN**, Poly(ADP-ribose) glycohydrolase ARH3 OS=Homo sapiens GN=ADPRHL2 PE=1 SV=1

Match to Query 35160: 1300.710928 from(651.362740,2+) rtinseconds(2295) index(27984)

Title: Locus:1.1.1.2304.38

Data file 2011-11-13 - TFD - EP 7-4.mgf

Click mouse within plot area to zoom in by factor of two about that point

Or, Plot from  to  Da

Label all possible matches  Label matches used for scoring

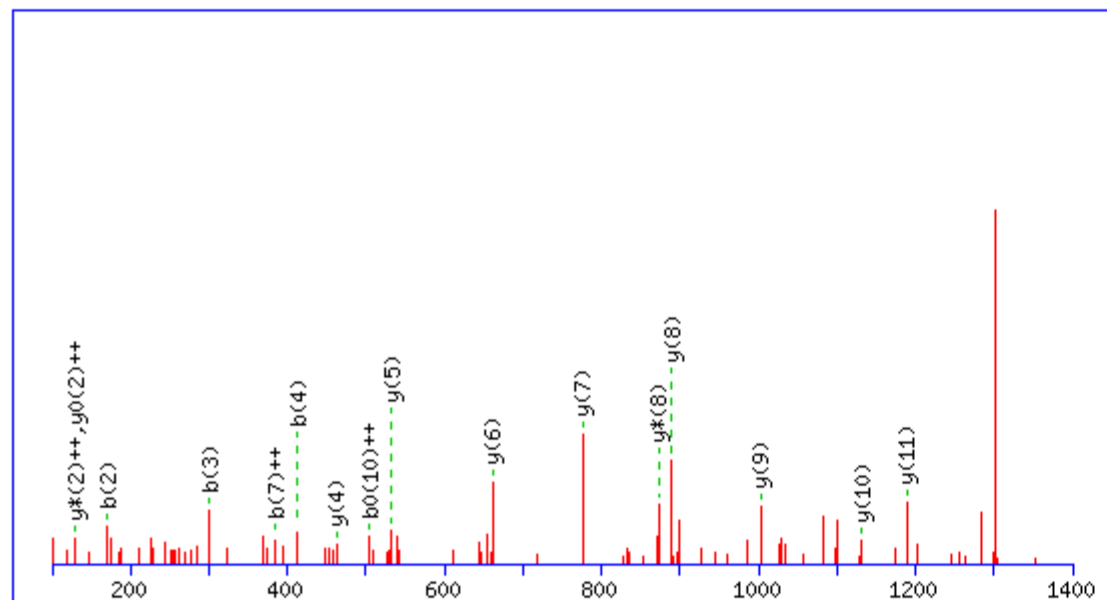

Monoisotopic mass of neutral peptide Mr(calc): 1300.698669

Fixed modifications: Propionamide (C) (apply to specified residues or termini only)

Ions Score: 58 Expect: 3.1e-005

Matches : 16/114 fragment ions using 24 most intense peaks [\(help\)](#)

| #  | b                 | b <sup>++</sup>   | b <sup>*</sup> | b <sup>*++</sup> | b <sup>0</sup> | b <sup>0++</sup>  | Seq. | y                  | y <sup>++</sup> | y <sup>*</sup>    | y <sup>*++</sup>  | y <sup>0</sup> | y <sup>0++</sup>  | #  |
|----|-------------------|-------------------|----------------|------------------|----------------|-------------------|------|--------------------|-----------------|-------------------|-------------------|----------------|-------------------|----|
| 1  | 114.091340        | 57.549308         |                |                  |                |                   | I    |                    |                 |                   |                   |                |                   | 12 |
| 2  | <b>171.112804</b> | 86.060040         |                |                  |                |                   | G    | <b>1188.621893</b> | 594.814585      | 1171.595344       | 586.301310        | 1170.611328    | 585.809302        | 11 |
| 3  | <b>300.155397</b> | 150.581336        |                |                  | 282.144832     | 141.576054        | E    | <b>1131.600429</b> | 566.303852      | 1114.573880       | 557.790578        | 1113.589864    | 557.298570        | 10 |
| 4  | <b>413.239461</b> | 207.123369        |                |                  | 395.228896     | 198.118086        | L    | <b>1002.557836</b> | 501.782556      | 985.531287        | 493.269281        | 984.547271     | 492.777273        | 9  |
| 5  | 526.323525        | 263.665401        |                |                  | 508.312960     | 254.660118        | L    | <b>889.473772</b>  | 445.240524      | <b>872.447223</b> | 436.727249        | 871.463207     | 436.235241        | 8  |
| 6  | 641.350468        | 321.178872        |                |                  | 623.339903     | 312.173589        | D    | <b>776.389708</b>  | 388.698492      | 759.363159        | 380.185217        | 758.379143     | 379.693209        | 7  |
| 7  | 769.409046        | <b>385.208161</b> | 752.382497     | 376.694887       | 751.398481     | 376.202879        | Q    | <b>661.362765</b>  | 331.185021      | 644.336216        | 322.671746        | 643.352200     | 322.179738        | 6  |
| 8  | 840.446160        | 420.726718        | 823.419611     | 412.213443       | 822.435595     | 411.721435        | A    | <b>533.304187</b>  | 267.155732      | 516.277638        | 258.642457        | 515.293622     | 258.150449        | 5  |
| 9  | 927.478188        | 464.242732        | 910.451639     | 455.729457       | 909.467623     | 455.237449        | S    | <b>462.267073</b>  | 231.637174      | 445.240524        | 223.123900        | 444.256508     | 222.631892        | 4  |
| 10 | 1026.546602       | 513.776939        | 1009.520053    | 505.263664       | 1008.536037    | <b>504.771656</b> | V    | 375.235045         | 188.121160      | 358.208496        | 179.607886        | 357.224480     | 179.115878        | 3  |
| 11 | 1127.594281       | 564.300778        | 1110.567732    | 555.787504       | 1109.583716    | 555.295496        | T    | 276.166631         | 138.586953      | 259.140082        | <b>130.073679</b> | 258.156066     | <b>129.581671</b> | 2  |
| 12 |                   |                   |                |                  |                |                   | R    | 175.118952         | 88.063114       | 158.092403        | 79.549839         |                |                   | 1  |

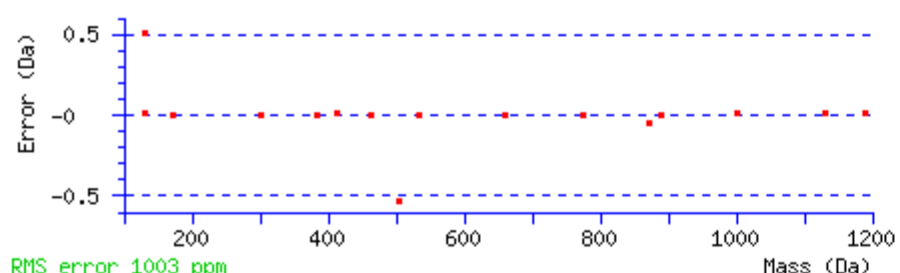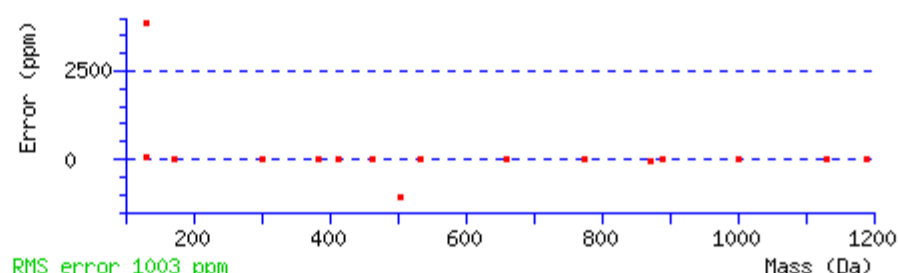

NCBI BLAST search of **IGELLDQASVTR**

(Parameters: blastp, nr protein database, expect=20000, no filter, PAM30)

Other BLAST [web gateways](#)

### All matches to this query

| Score | Mr(calc):   | Delta     | Sequence                      |
|-------|-------------|-----------|-------------------------------|
| 57.8  | 1300.698669 | 0.012259  | <a href="#">IGELLDQASVTR</a>  |
| 8.2   | 1300.709900 | 0.001028  | <a href="#">KAGRPGTSPLASK</a> |
| 7.2   | 1300.717941 | -0.007013 | <a href="#">WILAGVLSWEK</a>   |
| 6.3   | 1300.706039 | 0.004889  | <a href="#">IEAVKLQMEPK</a>   |
| 3.8   | 1300.707397 | 0.003531  | <a href="#">WLLMVNPTRR</a>    |
| 3.2   | 1300.707397 | 0.003531  | <a href="#">WLLMVNPTRR</a>    |
| 2.8   | 1300.706055 | 0.004873  | <a href="#">CLAATDLLLP GK</a> |
| 2.5   | 1300.706070 | 0.004858  | <a href="#">TPSGLQIMPLK</a>   |
| 2.0   | 1300.703400 | 0.007528  | <a href="#">TVVCRNVAGGVR</a>  |
| 1.9   | 1300.723816 | -0.012888 | <a href="#">SVIIPKLDDSSK</a>  |

**MATRIX SCIENCE Mascot Search Results**

**Peptide View**

MS/MS Fragmentation of **TSLALDESLFR**

Found in **PABP2\_HUMAN**, Polyadenylate-binding protein 2 OS=Homo sapiens GN=PABPN1 PE=1 SV=3

Match to Query 25852: 1250.654028 from(626.334290,2+) rtinseconds(3039) index(42536)

Title: Locus:1.1.1.2645.20

Data file 2011-11-10 - TFD - EP 4-3.mgf

Click mouse within plot area to zoom in by factor of two about that point

Or, Plot from  to  Da

Label all possible matches  Label matches used for scoring

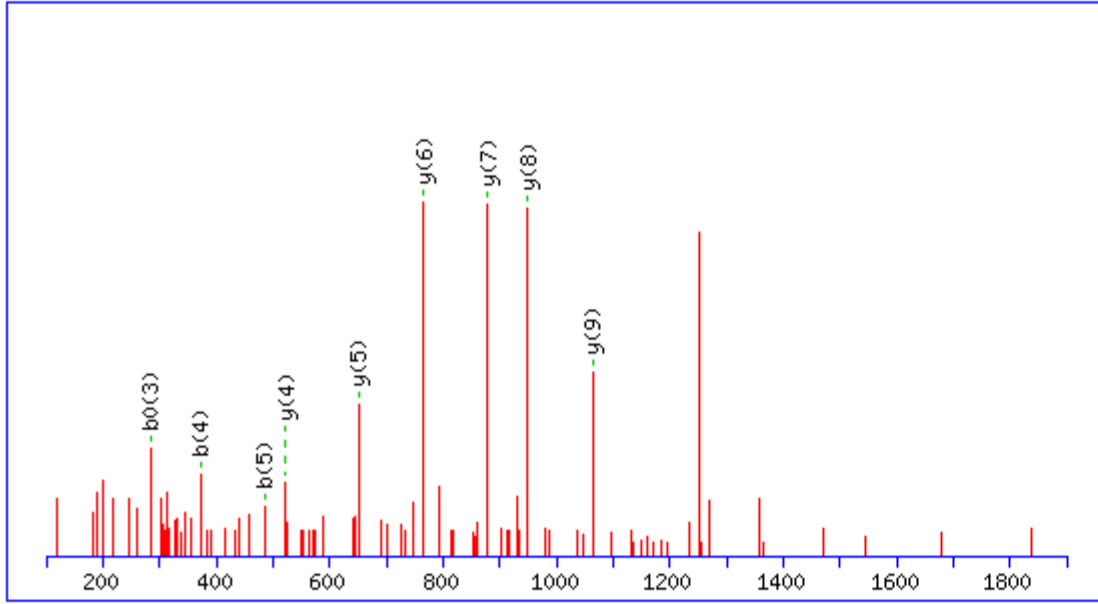

Monoisotopic mass of neutral peptide Mr(calc): 1250.650650

Fixed modifications: Propionamide (C) (apply to specified residues or termini only)

Ions Score: 51 Expect: 0.00025

Matches : 9/94 fragment ions using 12 most intense peaks [\(help\)](#)

| #  | b           | b <sup>++</sup> | b <sup>0</sup> | b <sup>0++</sup> | Seq. | y           | y <sup>++</sup> | y <sup>*</sup> | y <sup>*++</sup> | y <sup>0</sup> | y <sup>0++</sup> | #  |
|----|-------------|-----------------|----------------|------------------|------|-------------|-----------------|----------------|------------------|----------------|------------------|----|
| 1  | 102.054955  | 51.531116       | 84.044390      | 42.525833        | T    |             |                 |                |                  |                |                  | 11 |
| 2  | 189.086983  | 95.047129       | 171.076418     | 86.041847        | S    | 1150.610264 | 575.808770      | 1133.583715    | 567.295496       | 1132.599699    | 566.803487       | 10 |
| 3  | 302.171047  | 151.589161      | 284.160482     | 142.583879       | L    | 1063.578236 | 532.292756      | 1046.551687    | 523.779482       | 1045.567671    | 523.287474       | 9  |
| 4  | 373.208161  | 187.107718      | 355.197596     | 178.102436       | A    | 950.494172  | 475.750724      | 933.467623     | 467.237449       | 932.483607     | 466.745441       | 8  |
| 5  | 486.292225  | 243.649750      | 468.281660     | 234.644468       | L    | 879.457058  | 440.232167      | 862.430509     | 431.718892       | 861.446493     | 431.226884       | 7  |
| 6  | 601.319168  | 301.163222      | 583.308603     | 292.157940       | D    | 766.372994  | 383.690135      | 749.346445     | 375.176860       | 748.362429     | 374.684852       | 6  |
| 7  | 730.361761  | 365.684519      | 712.351196     | 356.679236       | E    | 651.346051  | 326.176664      | 634.319502     | 317.663389       | 633.335486     | 317.171381       | 5  |
| 8  | 817.393789  | 409.200533      | 799.383224     | 400.195250       | S    | 522.303458  | 261.655367      | 505.276909     | 253.142092       | 504.292893     | 252.650084       | 4  |
| 9  | 930.477853  | 465.742565      | 912.467288     | 456.737282       | L    | 435.271430  | 218.139353      | 418.244881     | 209.626078       |                |                  | 3  |
| 10 | 1077.546267 | 539.276772      | 1059.535702    | 530.271489       | F    | 322.187366  | 161.597321      | 305.160817     | 153.084046       |                |                  | 2  |
| 11 |             |                 |                |                  | R    | 175.118952  | 88.063114       | 158.092403     | 79.549839        |                |                  | 1  |

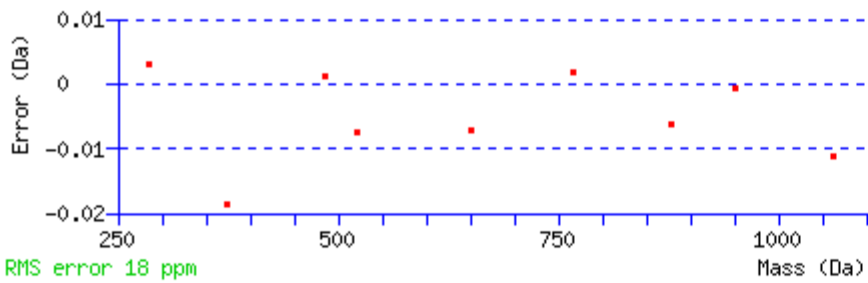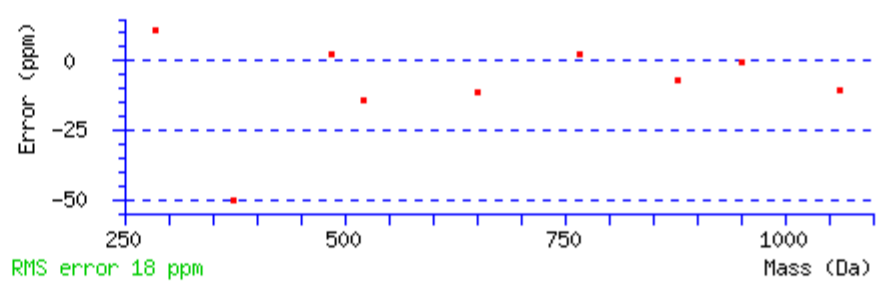

NCBI BLAST search of [TSLALDESLFR](#)

(Parameters: blastp, nr protein database, expect=20000, no filter, PAM30)

Other BLAST [web gateways](#)

**All matches to this query**

| Score | Mr(calc):   | Delta    | Sequence                    |
|-------|-------------|----------|-----------------------------|
| 50.6  | 1250.650650 | 0.003378 | <a href="#">TSLALDESLFR</a> |
| 1.4   | 1250.644775 | 0.009253 | <a href="#">RWFLYPPEK</a>   |

# **MATRIX** SCIENCE Mascot Search Results

## Peptide View

MS/MS Fragmentation of **EEERPLPR**

Found in **KCNA3\_HUMAN**, Potassium voltage-gated channel subfamily A member 3 OS=Homo sapiens GN=KCNA3 PE=2 SV=3

Match to Query 13144: 1056.509848 from(529.262200,2+) rtinseconds(1815) index(18666)

Title: Locus:1.1.1.2206.29

Data file 2011-11-12 - TFD - EP 5-3.mgf

Click mouse within plot area to zoom in by factor of two about that point

Or, Plot from  to  Da

Label all possible matches  Label matches used for scoring

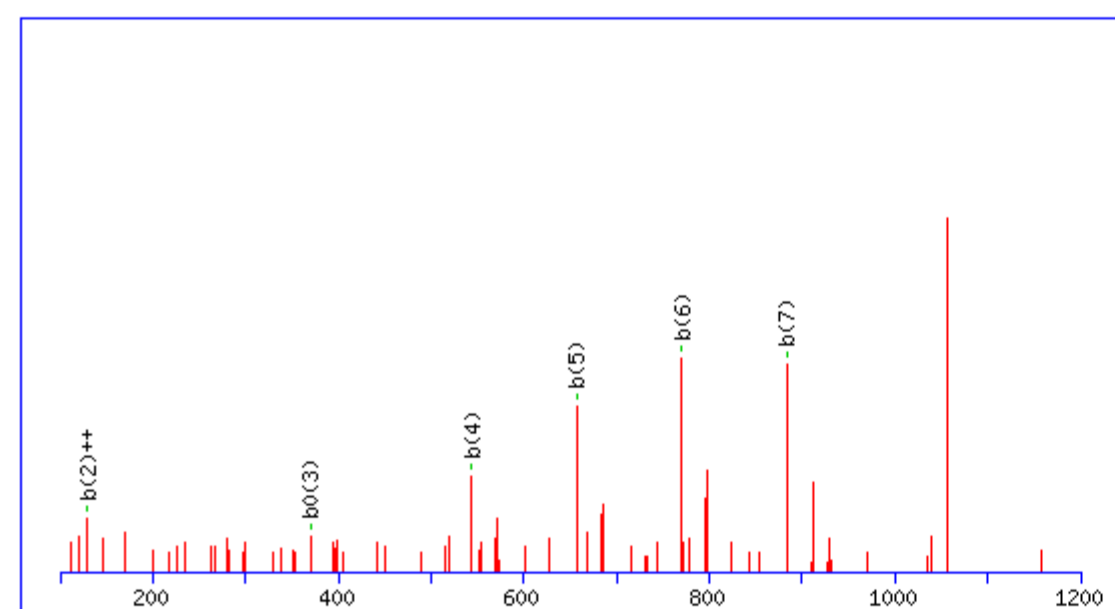

Monoisotopic mass of neutral peptide Mr(calc): 1056.519958

Fixed modifications: Propionamide (C) (apply to specified residues or termini only)

Variable modifications:

P5 : Oxidation (P)

P7 : Oxidation (P)

Ions Score: 36 Expect: 0.0023

Matches : 7/68 fragment ions using 10 most intense peaks ([help](#))

| # | b                 | b <sup>++</sup>   | b <sup>*</sup> | b <sup>*++</sup> | b <sup>0</sup>    | b <sup>0++</sup> | Seq.     | y          | y <sup>++</sup> | y <sup>*</sup> | y <sup>*++</sup> | y <sup>0</sup> | y <sup>0++</sup> | #        |
|---|-------------------|-------------------|----------------|------------------|-------------------|------------------|----------|------------|-----------------|----------------|------------------|----------------|------------------|----------|
| 1 | <b>130.049869</b> | 65.528572         |                |                  | 112.039304        | 56.523290        | <b>E</b> |            |                 |                |                  |                |                  | <b>8</b> |
| 2 | 259.092462        | <b>130.049869</b> |                |                  | 241.081897        | 121.044587       | <b>E</b> | 928.484671 | 464.745974      | 911.458122     | 456.232699       | 910.474106     | 455.740691       | <b>7</b> |
| 3 | 388.135055        | 194.571166        |                |                  | <b>370.124490</b> | 185.565883       | <b>E</b> | 799.442078 | 400.224677      | 782.415529     | 391.711403       | 781.431513     | 391.219395       | <b>6</b> |
| 4 | <b>544.236166</b> | 272.621721        | 527.209617     | 264.108447       | 526.225601        | 263.616439       | <b>R</b> | 670.399485 | 335.703381      | 653.372936     | 327.190106       |                |                  | <b>5</b> |
| 5 | <b>657.283845</b> | 329.145561        | 640.257296     | 320.632286       | 639.273280        | 320.140278       | <b>P</b> | 514.298374 | 257.652825      | 497.271825     | 249.139551       |                |                  | <b>4</b> |
| 6 | <b>770.367909</b> | 385.687593        | 753.341360     | 377.174318       | 752.357344        | 376.682310       | <b>L</b> | 401.250695 | 201.128986      | 384.224146     | 192.615711       |                |                  | <b>3</b> |
| 7 | <b>883.415588</b> | 442.211432        | 866.389039     | 433.698158       | 865.405023        | 433.206150       | <b>P</b> | 288.166631 | 144.586954      | 271.140082     | 136.073679       |                |                  | <b>2</b> |
| 8 |                   |                   |                |                  |                   |                  | <b>R</b> | 175.118952 | 88.063114       | 158.092403     | 79.549840        |                |                  | <b>1</b> |

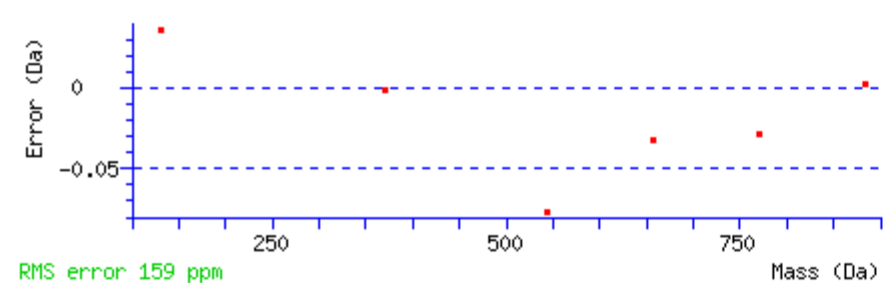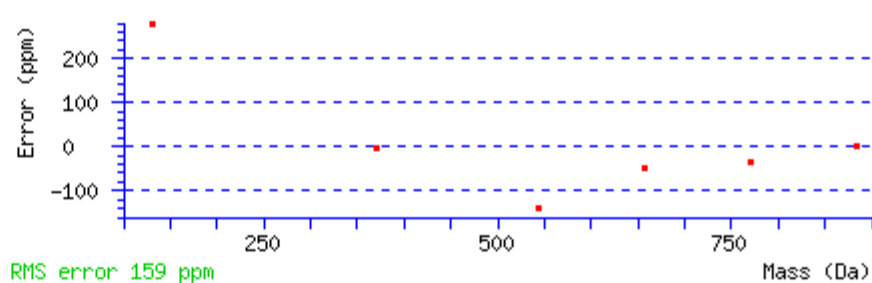

NCBI BLAST search of **EEERPLPR**

(Parameters: blastp, nr protein database, expect=20000, no filter, PAM30)

Other BLAST [web gateways](#)

All matches to this query

| Score | Mr(calc):   | Delta     | Sequence                   |
|-------|-------------|-----------|----------------------------|
| 36.0  | 1056.519958 | -0.010110 | <a href="#">EEERPLPR</a>   |
| 19.9  | 1056.508743 | 0.001105  | <a href="#">GEIDEPPLR</a>  |
| 19.9  | 1056.508743 | 0.001105  | <a href="#">LATEEPPPR</a>  |
| 19.8  | 1056.519974 | -0.010126 | <a href="#">EVEQNGIPR</a>  |
| 13.1  | 1056.508728 | 0.001120  | <a href="#">QAELQDEPK</a>  |
| 10.3  | 1056.508743 | 0.001105  | <a href="#">QDSPAGELPK</a> |
| 9.6   | 1056.519974 | -0.010126 | <a href="#">DAAAPSQPLR</a> |
| 9.5   | 1056.519974 | -0.010126 | <a href="#">QLEGNDPLR</a>  |
| 9.4   | 1056.519989 | -0.010141 | <a href="#">EVTTPPNQR</a>  |
| 8.7   | 1056.508743 | 0.001105  | <a href="#">EDSPLPDLR</a>  |

Mascot: <http://www.matrixscience.com/>

# MASCOT SEARCH RESULTS

## Peptide View

MS/MS Fragmentation of **ALDDFVLGSAR**

Found in **PRAF2\_HUMAN**, PRA1 family protein 2 OS=Homo sapiens GN=PRAF2 PE=1 SV=1

Match to Query 32554: 1162.596968 from(582.305760,2+) rtinseconds(2893) index(37445)

Title: Locus:1.1.1.2359.22

Data file 2011-11-10 - TFD - EP 4-6.mgf

Click mouse within plot area to zoom in by factor of two about that point

Or, Plot from  to  Da

Label all possible matches  Label matches used for scoring

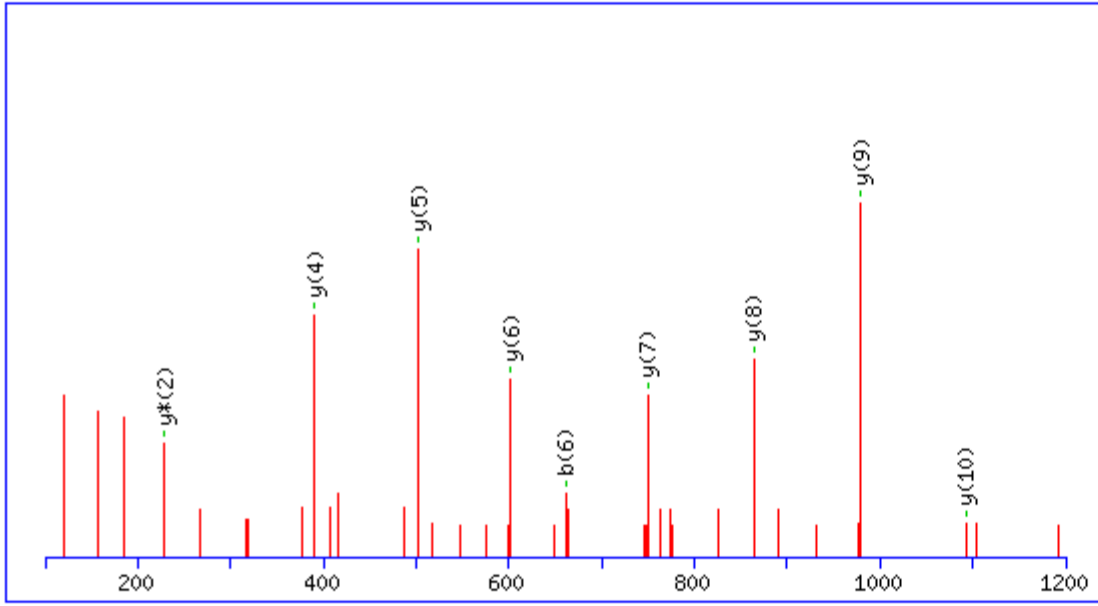

Monoisotopic mass of neutral peptide Mr(calc): 1162.598236

Fixed modifications: Propionamide (C) (apply to specified residues or termini only)

Ions Score: 65 Expect: 3.4e-006

Matches : 9/92 fragment ions using 10 most intense peaks ([help](#))

| #  | b          | b <sup>++</sup> | b <sup>0</sup> | b <sup>0++</sup> | Seq. | y           | y <sup>++</sup> | y <sup>*</sup> | y <sup>*++</sup> | y <sup>0</sup> | y <sup>0++</sup> | #  |
|----|------------|-----------------|----------------|------------------|------|-------------|-----------------|----------------|------------------|----------------|------------------|----|
| 1  | 72.044390  | 36.525833       |                |                  | A    |             |                 |                |                  |                |                  | 11 |
| 2  | 185.128454 | 93.067865       |                |                  | L    | 1092.568400 | 546.787838      | 1075.541851    | 538.274564       | 1074.557835    | 537.782556       | 10 |
| 3  | 300.155397 | 150.581336      | 282.144832     | 141.576054       | D    | 979.484336  | 490.245806      | 962.457787     | 481.732532       | 961.473771     | 481.240524       | 9  |
| 4  | 415.182340 | 208.094808      | 397.171775     | 199.089526       | D    | 864.457393  | 432.732335      | 847.430844     | 424.219060       | 846.446828     | 423.727052       | 8  |
| 5  | 562.250754 | 281.629015      | 544.240189     | 272.623733       | F    | 749.430450  | 375.218863      | 732.403901     | 366.705589       | 731.419885     | 366.213581       | 7  |
| 6  | 661.319168 | 331.163222      | 643.308603     | 322.157940       | V    | 602.362036  | 301.684656      | 585.335487     | 293.171382       | 584.351471     | 292.679374       | 6  |
| 7  | 774.403232 | 387.705254      | 756.392667     | 378.699972       | L    | 503.293622  | 252.150449      | 486.267073     | 243.637175       | 485.283057     | 243.145167       | 5  |
| 8  | 831.424696 | 416.215986      | 813.414131     | 407.210704       | G    | 390.209558  | 195.608417      | 373.183009     | 187.095143       | 372.198993     | 186.603135       | 4  |
| 9  | 918.456724 | 459.732000      | 900.446159     | 450.726718       | S    | 333.188094  | 167.097685      | 316.161545     | 158.584410       | 315.177529     | 158.092402       | 3  |
| 10 | 989.493838 | 495.250557      | 971.483273     | 486.245274       | A    | 246.156066  | 123.581671      | 229.129517     | 115.068397       |                |                  | 2  |
| 11 |            |                 |                |                  | R    | 175.118952  | 88.063114       | 158.092403     | 79.549840        |                |                  | 1  |

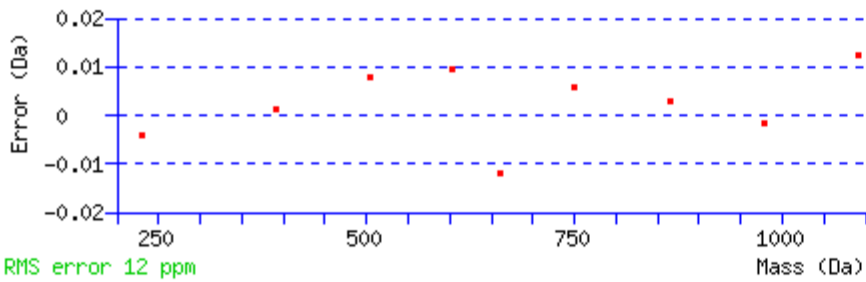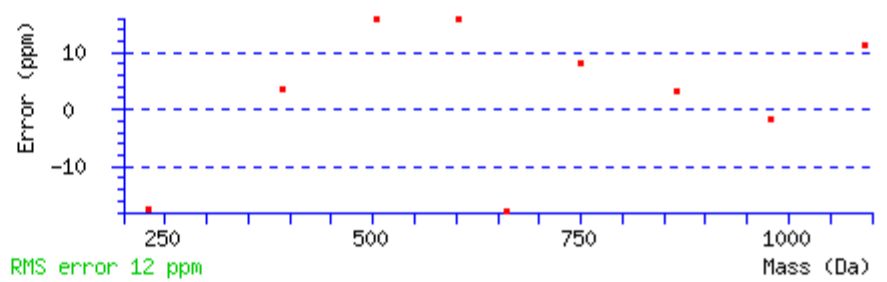

NCBI BLAST search of [ALDDFVLGSAR](#)

(Parameters: blastp, nr protein database, expect=20000, no filter, PAM30)

Other BLAST [web gateways](#)

## All matches to this query

| Score | Mr(calc):   | Delta     | Sequence                    |
|-------|-------------|-----------|-----------------------------|
| 64.7  | 1162.598236 | -0.001268 | <a href="#">ALDDFVLGSAR</a> |
| 6.2   | 1162.588333 | 0.008635  | <a href="#">AIDSFPRWR</a>   |
| 6.2   | 1162.586990 | 0.009978  | <a href="#">SITLFPDENK</a>  |
| 4.8   | 1162.598206 | -0.001238 | <a href="#">IATEAIENFR</a>  |

Mascot: <http://www.matrixscience.com/>



# MASCOT Search Results

## Peptide View

MS/MS Fragmentation of **STTLDAGNIK**

Found in **PR40A\_HUMAN**, Pre-mRNA-processing factor 40 homolog A OS=Homo sapiens GN=PRPF40A PE=1 SV=2

Match to Query 285857: 1018.526668 from(510.270610,2+) rtinseconds(1399) index(251309)

Title: Locus:1.1.1.977.10

Data file C:\Program Files (x86)\Matrix Science\Mascot Daemon\mgf3 TFD - Epitel - R2\mascot\_daemon\_merge.mgf

Click mouse within plot area to zoom in by factor of two about that point

Or, Plot from  to  Da

Label all possible matches  Label matches used for scoring

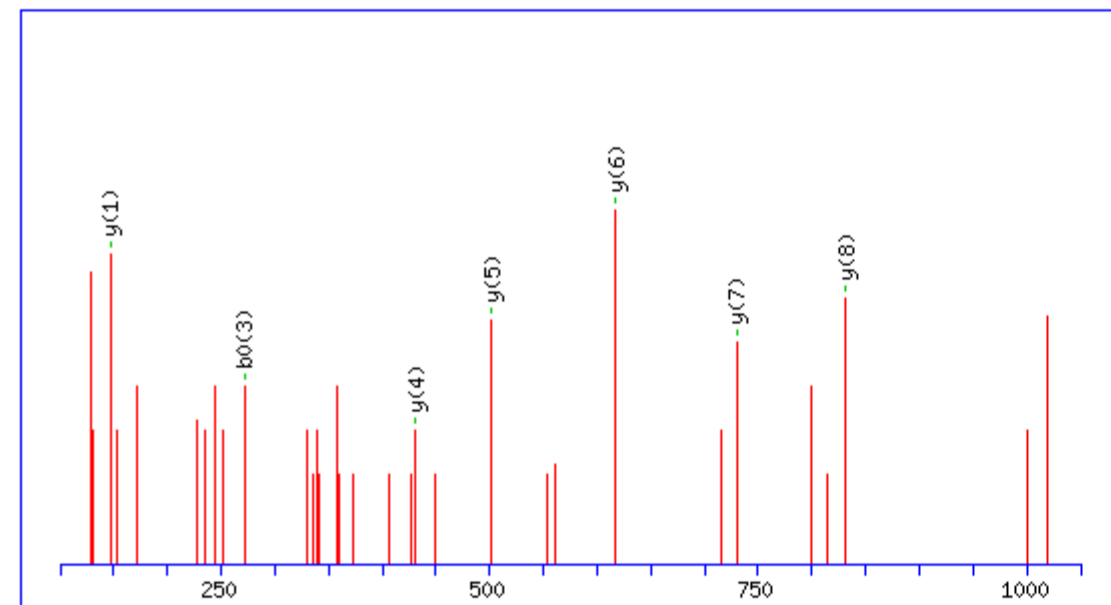

Monoisotopic mass of neutral peptide Mr(calc): 1018.529480

Fixed modifications: Carbamidomethyl (C) (apply to specified residues or termini only)

Ions Score: 36 Expect: 0.0035

Matches : 7/84 fragment ions using 15 most intense peaks ([help](#))

| #  | b          | b <sup>++</sup> | b <sup>*</sup> | b <sup>*++</sup> | b <sup>0</sup> | b <sup>0++</sup> | Seq. | y          | y <sup>++</sup> | y <sup>*</sup> | y <sup>*++</sup> | y <sup>0</sup> | y <sup>0++</sup> | #  |
|----|------------|-----------------|----------------|------------------|----------------|------------------|------|------------|-----------------|----------------|------------------|----------------|------------------|----|
| 1  | 88.039304  | 44.523290       |                |                  | 70.028739      | 35.518008        | S    |            |                 |                |                  |                |                  | 10 |
| 2  | 189.086983 | 95.047129       |                |                  | 171.076418     | 86.041847        | T    | 932.504738 | 466.756007      | 915.478189     | 458.242733       | 914.494173     | 457.750725       | 9  |
| 3  | 290.134662 | 145.570969      |                |                  | 272.124097     | 136.565687       | T    | 831.457059 | 416.232168      | 814.430510     | 407.718893       | 813.446494     | 407.226885       | 8  |
| 4  | 403.218726 | 202.113001      |                |                  | 385.208161     | 193.107719       | L    | 730.409380 | 365.708328      | 713.382831     | 357.195054       | 712.398815     | 356.703046       | 7  |
| 5  | 518.245669 | 259.626473      |                |                  | 500.235104     | 250.621190       | D    | 617.325316 | 309.166296      | 600.298767     | 300.653022       | 599.314751     | 300.161014       | 6  |
| 6  | 589.282783 | 295.145030      |                |                  | 571.272218     | 286.139747       | A    | 502.298373 | 251.652824      | 485.271824     | 243.139550       |                |                  | 5  |
| 7  | 646.304247 | 323.655762      |                |                  | 628.293682     | 314.650479       | G    | 431.261259 | 216.134267      | 414.234710     | 207.620993       |                |                  | 4  |
| 8  | 760.347174 | 380.677225      | 743.320625     | 372.163951       | 742.336609     | 371.671943       | N    | 374.239795 | 187.623535      | 357.213246     | 179.110261       |                |                  | 3  |
| 9  | 873.431238 | 437.219257      | 856.404689     | 428.705983       | 855.420673     | 428.213975       | I    | 260.196868 | 130.602072      | 243.170319     | 122.088798       |                |                  | 2  |
| 10 |            |                 |                |                  |                |                  | K    | 147.112804 | 74.060040       | 130.086255     | 65.546765        |                |                  | 1  |

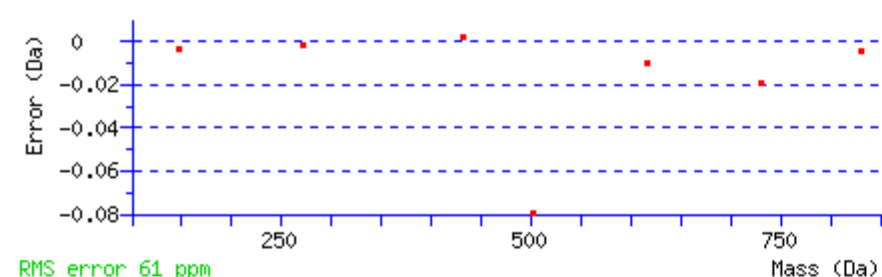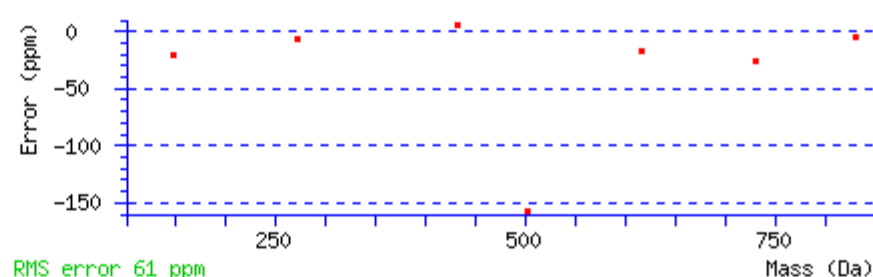

NCBI BLAST search of [STTLDAGNIK](#)

(Parameters: blastp, nr protein database, expect=20000, no filter, PAM30)

Other BLAST [web gateways](#)

## All matches to this query

| Score | Mr(calc):   | Delta     | Sequence                    |
|-------|-------------|-----------|-----------------------------|
| 35.8  | 1018.529480 | -0.002812 | <a href="#">STTLDAGNIK</a>  |
| 16.4  | 1018.522949 | 0.003719  | <a href="#">MGTKAQVER</a>   |
| 15.7  | 1018.529465 | -0.002797 | <a href="#">QEKTGLESK</a>   |
| 12.7  | 1018.529510 | -0.002842 | <a href="#">STVISGPGTGK</a> |
| 8.8   | 1018.536850 | -0.010182 | <a href="#">EQMLLLEK</a>    |
| 7.1   | 1018.529480 | -0.002812 | <a href="#">SPSVLSLSQSK</a> |
| 6.1   | 1018.529465 | -0.002797 | <a href="#">ESSTKPKDKK</a>  |
| 5.6   | 1018.529480 | -0.002812 | <a href="#">SKAGVTPESK</a>  |
| 5.2   | 1018.529480 | -0.002812 | <a href="#">DSLGPTKSSK</a>  |
| 5.0   | 1018.529465 | -0.002797 | <a href="#">TSEAAVKEGK</a>  |

Mascot: <http://www.matrixscience.com/>

**Peptide View**

MS/MS Fragmentation of **TIVQLENEIYQIK**

Found in **SPF27\_HUMAN**, Pre-mRNA-splicing factor SPF27 OS=Homo sapiens GN=BCAS2 PE=1 SV=1

Match to Query 46129: 1589.860748 from(795.937650,2+) rtinseconds(3470) index(47864)

Title: Locus:1.1.1.2737.44

Data file 2011-11-13 - TFD - EP 7-5.mgf

Click mouse within plot area to zoom in by factor of two about that point

Or, Plot from  to  Da

Label all possible matches  Label matches used for scoring

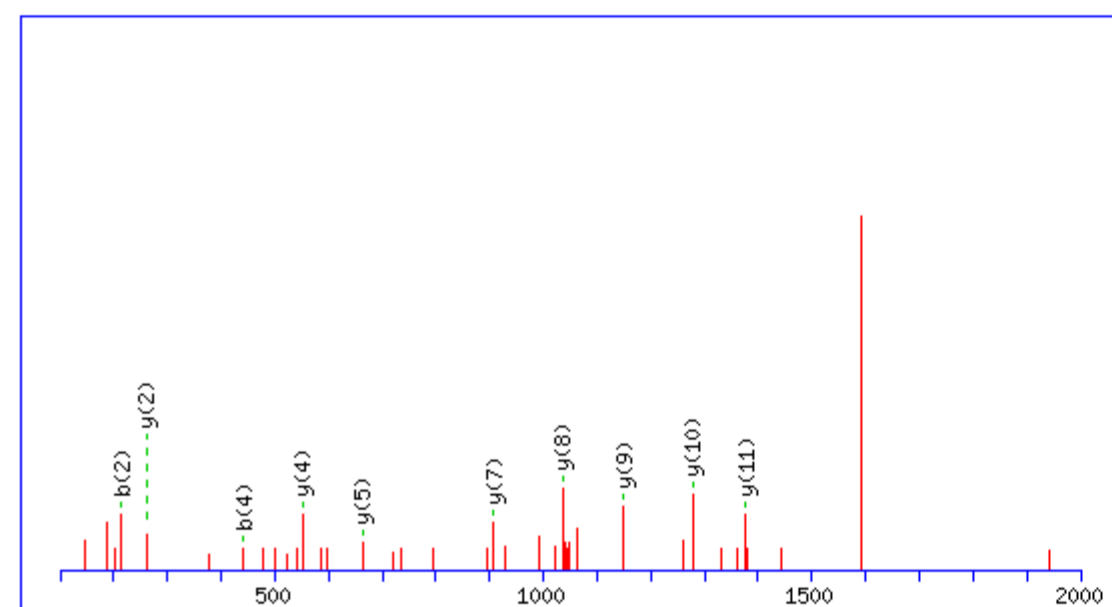

Monoisotopic mass of neutral peptide Mr(calc): 1589.866440

Fixed modifications: Propionamide (C) (apply to specified residues or termini only)

Ions Score: 66 Expect: 7.3e-007

Matches : 10/128 fragment ions using 13 most intense peaks ([help](#))

| #  | b                 | b <sup>++</sup> | b <sup>+</sup> | b <sup>+++</sup> | b <sup>0</sup> | b <sup>0++</sup> | Seq. | y                  | y <sup>++</sup> | y <sup>+</sup> | y <sup>+++</sup> | y <sup>0</sup> | y <sup>0++</sup> | #  |
|----|-------------------|-----------------|----------------|------------------|----------------|------------------|------|--------------------|-----------------|----------------|------------------|----------------|------------------|----|
| 1  | 102.054955        | 51.531116       |                |                  | 84.044390      | 42.525833        | T    |                    |                 |                |                  |                |                  | 13 |
| 2  | <b>215.139019</b> | 108.073147      |                |                  | 197.128454     | 99.067865        | I    | 1489.826072        | 745.416674      | 1472.799523    | 736.903400       | 1471.815507    | 736.411392       | 12 |
| 3  | 314.207433        | 157.607354      |                |                  | 296.196868     | 148.602072       | V    | <b>1376.742008</b> | 688.874642      | 1359.715459    | 680.361368       | 1358.731443    | 679.869360       | 11 |
| 4  | <b>442.266011</b> | 221.636643      | 425.239462     | 213.123369       | 424.255446     | 212.631361       | Q    | <b>1277.673594</b> | 639.340435      | 1260.647045    | 630.827161       | 1259.663029    | 630.335153       | 10 |
| 5  | 555.350075        | 278.178676      | 538.323526     | 269.665401       | 537.339510     | 269.173393       | L    | <b>1149.615016</b> | 575.311146      | 1132.588467    | 566.797872       | 1131.604451    | 566.305863       | 9  |
| 6  | 684.392668        | 342.699972      | 667.366119     | 334.186698       | 666.382103     | 333.694690       | E    | <b>1036.530952</b> | 518.769114      | 1019.504403    | 510.255840       | 1018.520387    | 509.763832       | 8  |
| 7  | 798.435595        | 399.721436      | 781.409046     | 391.208161       | 780.425030     | 390.716153       | N    | <b>907.488359</b>  | 454.247818      | 890.461810     | 445.734543       | 889.477794     | 445.242535       | 7  |
| 8  | 927.478188        | 464.242732      | 910.451639     | 455.729458       | 909.467623     | 455.237450       | E    | 793.445432         | 397.226354      | 776.418883     | 388.713080       | 775.434867     | 388.221072       | 6  |
| 9  | 1040.562252       | 520.784764      | 1023.535703    | 512.271489       | 1022.551687    | 511.779481       | I    | <b>664.402839</b>  | 332.705058      | 647.376290     | 324.191783       |                |                  | 5  |
| 10 | 1203.625581       | 602.316429      | 1186.599032    | 593.803154       | 1185.615016    | 593.311146       | Y    | <b>551.318775</b>  | 276.163026      | 534.292226     | 267.649751       |                |                  | 4  |
| 11 | 1331.684159       | 666.345718      | 1314.657610    | 657.832443       | 1313.673594    | 657.340435       | Q    | 388.255446         | 194.631361      | 371.228897     | 186.118087       |                |                  | 3  |
| 12 | 1444.768223       | 722.887750      | 1427.741674    | 714.374475       | 1426.757658    | 713.882467       | I    | <b>260.196868</b>  | 130.602072      | 243.170319     | 122.088797       |                |                  | 2  |
| 13 |                   |                 |                |                  |                |                  | K    | 147.112804         | 74.060040       | 130.086255     | 65.546765        |                |                  | 1  |

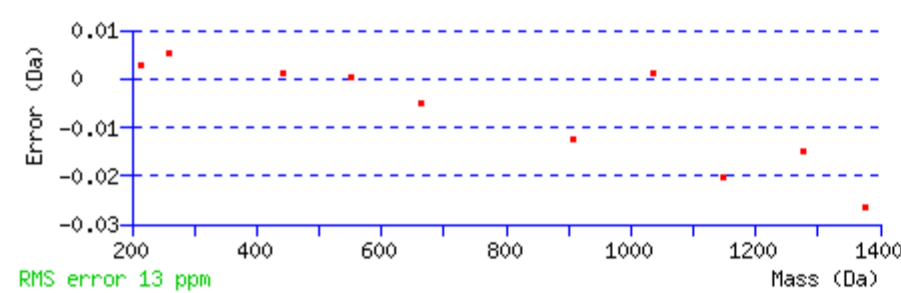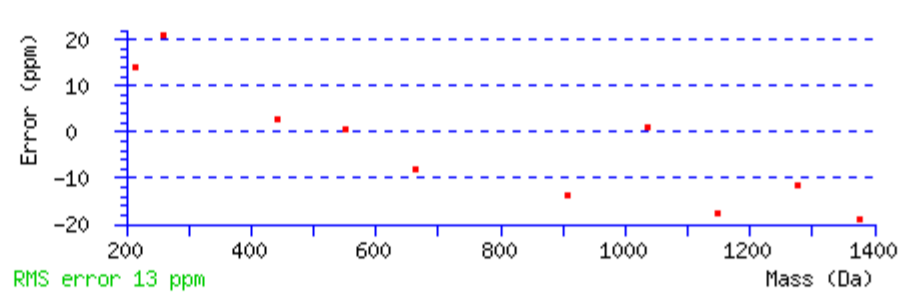

NCBI BLAST search of **TIVQLENEIYQIK**

(Parameters: blastp, nr protein database, expect=20000, no filter, PAM30)

Other BLAST [web gateways](#)

**All matches to this query**

| Score | Mr(calc):   | Delta     | Sequence                       |
|-------|-------------|-----------|--------------------------------|
| 66.2  | 1589.866440 | -0.005692 | <a href="#">TIVQLENEIYQIK</a>  |
| 0.8   | 1589.867783 | -0.007035 | <a href="#">ASQARLHYLSGFIK</a> |
| 0.5   | 1589.859924 | 0.000824  | <a href="#">LSLQELTWKMSVR</a>  |
| 0.4   | 1589.866409 | -0.005661 | <a href="#">EKLALALENEGYIK</a> |

# **MASCOT** Mascot Search Results

## Peptide View

MS/MS Fragmentation of **DAEAEGLSGTTLLPK**

Found in **PRAF1\_HUMAN**, Prenylated Rab acceptor protein 1 OS=Homo sapiens GN=RABAC1 PE=1 SV=1

Match to Query 45281: 1500.770068 from(751.392310,2+) rtinseconds(2647) index(33095)

Title: Locus:1.1.1.2160.42

Data file 2011-11-12 - TFD - EP 6-6.mgf

Click mouse within plot area to zoom in by factor of two about that point

Or, Plot from  to  Da

Label all possible matches  Label matches used for scoring

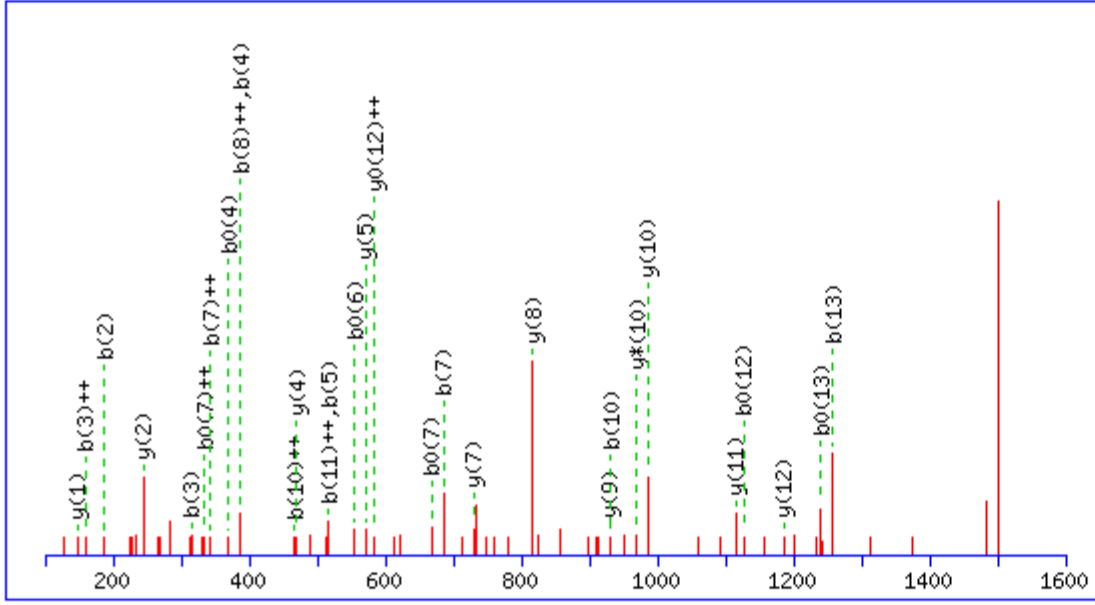

Monoisotopic mass of neutral peptide Mr(calc): 1500.767136

Fixed modifications: Propionamide (C) (apply to specified residues or termini only)

Ions Score: 58 Expect: 2e-005

Matches : 30/132 fragment ions using 56 most intense peaks [\(help\)](#)

| #  | b                  | b <sup>++</sup>   | b <sup>0</sup>     | b <sup>0++</sup>  | Seq. | y                  | y <sup>++</sup> | y <sup>*</sup>    | y <sup>*++</sup> | y <sup>0</sup> | y <sup>0++</sup>  | #  |
|----|--------------------|-------------------|--------------------|-------------------|------|--------------------|-----------------|-------------------|------------------|----------------|-------------------|----|
| 1  | 116.034219         | 58.520748         | 98.023654          | 49.515465         | D    |                    |                 |                   |                  |                |                   | 15 |
| 2  | <b>187.071333</b>  | 94.039304         | 169.060768         | 85.034022         | A    | 1386.747488        | 693.877382      | 1369.720939       | 685.364108       | 1368.736923    | 684.872099        | 14 |
| 3  | <b>316.113926</b>  | <b>158.560601</b> | 298.103361         | 149.555319        | E    | 1315.710374        | 658.358825      | 1298.683825       | 649.845551       | 1297.699809    | 649.353543        | 13 |
| 4  | <b>387.151040</b>  | 194.079158        | <b>369.140475</b>  | 185.073876        | A    | <b>1186.667781</b> | 593.837529      | 1169.641232       | 585.324254       | 1168.657216    | <b>584.832246</b> | 12 |
| 5  | <b>516.193633</b>  | 258.600455        | 498.183068         | 249.595172        | E    | <b>1115.630667</b> | 558.318972      | 1098.604118       | 549.805697       | 1097.620102    | 549.313689        | 11 |
| 6  | 573.215097         | 287.111187        | <b>555.204532</b>  | 278.105904        | G    | <b>986.588074</b>  | 493.797675      | <b>969.561525</b> | 485.284401       | 968.577509     | 484.792393        | 10 |
| 7  | <b>686.299161</b>  | <b>343.653219</b> | <b>668.288596</b>  | <b>334.647936</b> | L    | <b>929.566610</b>  | 465.286943      | 912.540061        | 456.773668       | 911.556045     | 456.281660        | 9  |
| 8  | 773.331189         | <b>387.169233</b> | 755.320624         | 378.163950        | S    | <b>816.482546</b>  | 408.744911      | 799.455997        | 400.231636       | 798.471981     | 399.739628        | 8  |
| 9  | 830.352653         | 415.679965        | 812.342088         | 406.674682        | G    | <b>729.450518</b>  | 365.228897      | 712.423969        | 356.715622       | 711.439953     | 356.223615        | 7  |
| 10 | <b>931.400332</b>  | <b>466.203804</b> | 913.389767         | 457.198522        | T    | 672.429054         | 336.718165      | 655.402505        | 328.204890       | 654.418489     | 327.712882        | 6  |
| 11 | 1032.448011        | <b>516.727644</b> | 1014.437446        | 507.722361        | T    | <b>571.381375</b>  | 286.194325      | 554.354826        | 277.681051       | 553.370810     | 277.189043        | 5  |
| 12 | 1145.532075        | 573.269676        | <b>1127.521510</b> | 564.264393        | L    | <b>470.333696</b>  | 235.670486      | 453.307147        | 227.157211       |                |                   | 4  |
| 13 | <b>1258.616139</b> | 629.811708        | <b>1240.605574</b> | 620.806425        | L    | 357.249632         | 179.128454      | 340.223083        | 170.615179       |                |                   | 3  |
| 14 | 1355.668903        | 678.338090        | 1337.658338        | 669.332807        | P    | <b>244.165568</b>  | 122.586422      | 227.139019        | 114.073148       |                |                   | 2  |
| 15 |                    |                   |                    |                   | K    | <b>147.112804</b>  | 74.060040       | 130.086255        | 65.546765        |                |                   | 1  |

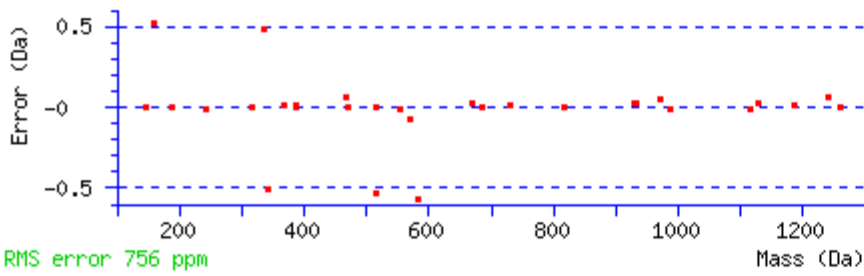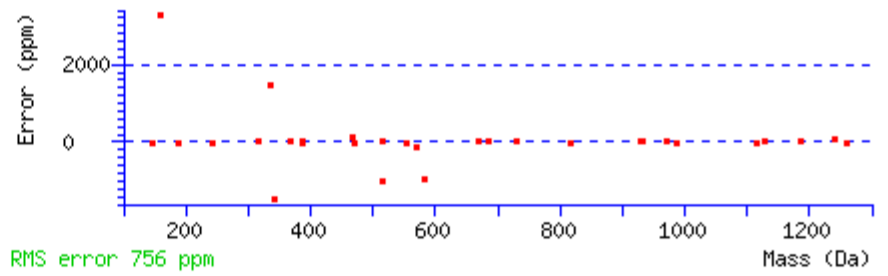

NCBI BLAST search of [DAEAEGLSGTTLLPK](#)

(Parameters: blastp, nr protein database, expect=20000, no filter, PAM30)

Other BLAST [web gateways](#)

## All matches to this query

| Score | Mr(calc):   | Delta     | Sequence                        |
|-------|-------------|-----------|---------------------------------|
| 58.4  | 1500.767136 | 0.002932  | <a href="#">DAEAEGLSGTTLLPK</a> |
| 9.4   | 1500.760620 | 0.009448  | <a href="#">GIEPTGNMVKQPAK</a>  |
| 7.3   | 1500.760620 | 0.009448  | <a href="#">GIEPTGNMVKQPAK</a>  |
| 4.2   | 1500.779709 | -0.009641 | <a href="#">ERPTSPAPHRPPK</a>   |
| 1.8   | 1500.760620 | 0.009448  | <a href="#">GIEPTGNMVKQPAK</a>  |
| 1.5   | 1500.771835 | -0.001767 | <a href="#">RENIVGDAMEVLR</a>   |
| 0.2   | 1500.779724 | -0.009656 | <a href="#">RHRPSPATPPP</a>     |
| 0.2   | 1500.779724 | -0.009656 | <a href="#">RHRPSPATPPP</a>     |

# MASCOT Search Results

## Peptide View

### MS/MS Fragmentation of TIAFLLPMFR

Found in **DDX46\_HUMAN**, Probable ATP-dependent RNA helicase DDX46 OS=Homo sapiens GN=DDX46 PE=1 SV=2

Match to Query 30804: 1223.666308 from(612.840430,2+) rtinseconds(3797) index(55639)

Title: Locus:1.1.1.2837.17

Data file 2011-11-14 - TFD - EP 8-1.mgf

Click mouse within plot area to zoom in by factor of two about that point

Or, Plot from  to  Da

Label all possible matches  Label matches used for scoring

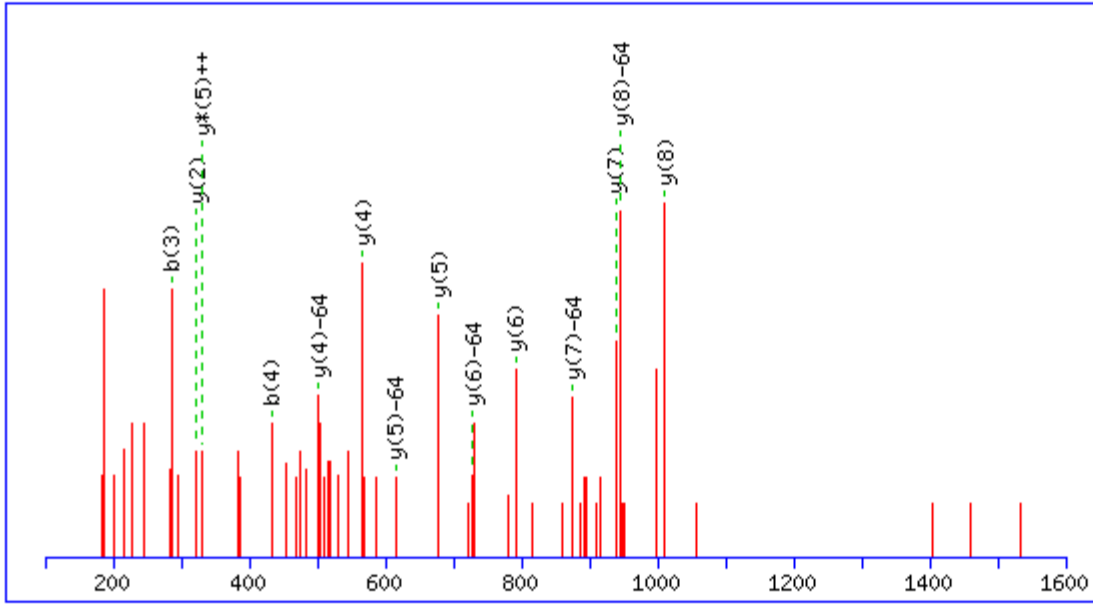

Monoisotopic mass of neutral peptide Mr(calc): 1223.673645

Fixed modifications: Propionamide (C) (apply to specified residues or termini only)

Variable modifications:

M8 : Oxidation (M), with neutral losses 0.000000 (shown in table), 63.998285

Ions Score: 31 Expect: 0.0059

Matches : 14/108 fragment ions using 27 most intense peaks ([help](#))

| #  | b                 | b <sup>++</sup> | b <sup>0</sup> | b <sup>0++</sup> | Seq. | y                  | y <sup>++</sup> | y <sup>*</sup> | y <sup>*++</sup>  | #  |
|----|-------------------|-----------------|----------------|------------------|------|--------------------|-----------------|----------------|-------------------|----|
| 1  | 102.054955        | 51.531116       | 84.044390      | 42.525833        | T    |                    |                 |                |                   | 10 |
| 2  | 215.139019        | 108.073147      | 197.128454     | 99.067865        | I    | 1123.633250        | 562.320263      | 1106.606701    | 553.806989        | 9  |
| 3  | <b>286.176133</b> | 143.591704      | 268.165568     | 134.586422       | A    | <b>1010.549186</b> | 505.778231      | 993.522637     | 497.264957        | 8  |
| 4  | <b>433.244547</b> | 217.125911      | 415.233982     | 208.120629       | F    | <b>939.512072</b>  | 470.259674      | 922.485523     | 461.746400        | 7  |
| 5  | 546.328611        | 273.667944      | 528.318046     | 264.662661       | L    | <b>792.443658</b>  | 396.725467      | 775.417109     | 388.212193        | 6  |
| 6  | 659.412675        | 330.209976      | 641.402110     | 321.204693       | L    | <b>679.359594</b>  | 340.183435      | 662.333045     | <b>331.670161</b> | 5  |
| 7  | 756.465439        | 378.736358      | 738.454874     | 369.731075       | P    | <b>566.275530</b>  | 283.641403      | 549.248981     | 275.128129        | 4  |
| 8  | 903.500839        | 452.254058      | 885.490274     | 443.248775       | M    | 469.222766         | 235.115021      | 452.196217     | 226.601746        | 3  |
| 9  | 1050.569253       | 525.788265      | 1032.558688    | 516.782982       | F    | <b>322.187366</b>  | 161.597321      | 305.160817     | 153.084047        | 2  |
| 10 |                   |                 |                |                  | R    | 175.118952         | 88.063114       | 158.092403     | 79.549839         | 1  |

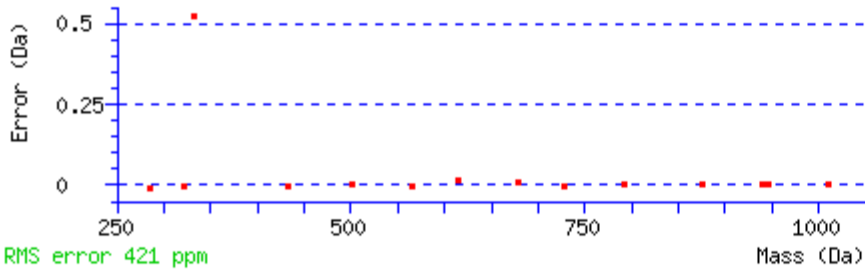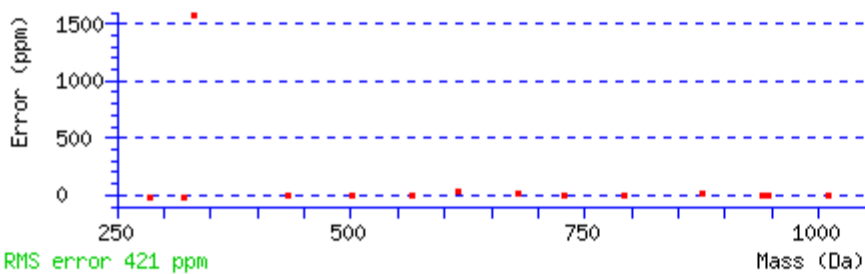

### NCBI BLAST search of TIAFLLPMFR

(Parameters: blastp, nr protein database, expect=20000, no filter, PAM30)

Other BLAST [web gateways](#)

### All matches to this query

| Score | Mr(calc):   | Delta     | Sequence                   |
|-------|-------------|-----------|----------------------------|
| 31.2  | 1223.673645 | -0.007337 | <a href="#">TIAFLLPMFR</a> |
| 22.4  | 1223.673645 | -0.007337 | <a href="#">TIAFLLPMFR</a> |

# Mascot Search Results

## Peptide View

MS/MS Fragmentation of **GVTQYYAYVTER**

Found in **DDX6\_HUMAN**, Probable ATP-dependent RNA helicase DDX6 OS=Homo sapiens GN=DDX6 PE=1 SV=2

Match to Query 38954: 1448.694408 from(725.354480,2+) rtinseconds(2645) index(35059)

Title: Locus:1.1.1.2495.43

Data file 2011-11-10 - TFD - EP 4-3.mgf

Click mouse within plot area to zoom in by factor of two about that point

Or, Plot from  to  Da

Label all possible matches  Label matches used for scoring

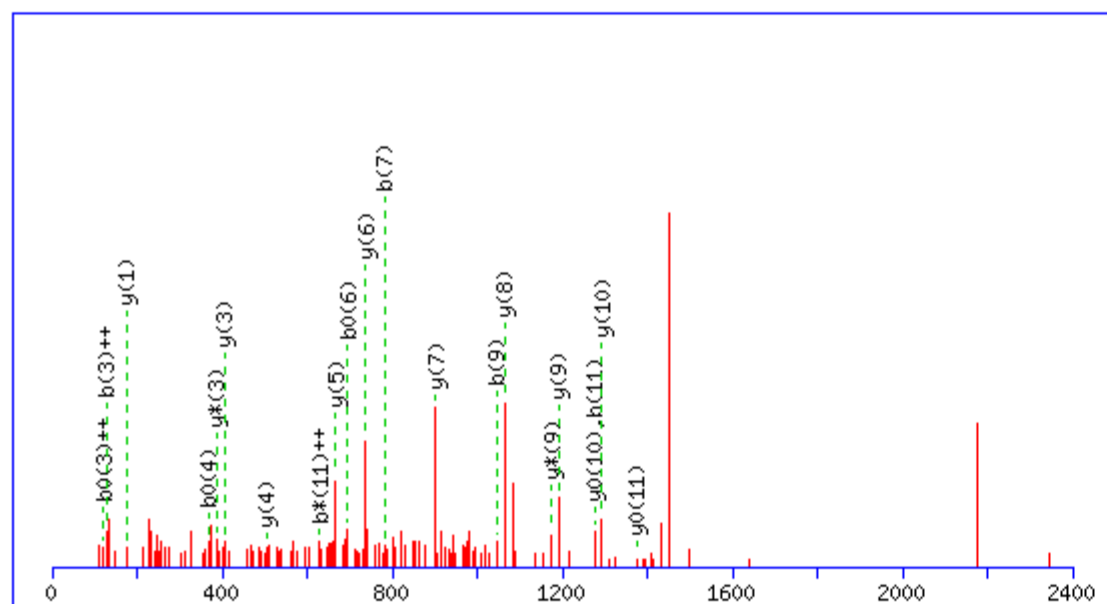

Monoisotopic mass of neutral peptide Mr(calc): 1448.693588

Fixed modifications: Propionamide (C) (apply to specified residues or termini only)

Ions Score: 32 Expect: 0.0032

Matches : 21/120 fragment ions using 67 most intense peaks ([help](#))

| #  | b           | b <sup>++</sup> | b <sup>*</sup> | b <sup>*++</sup> | b <sup>0</sup> | b <sup>0++</sup> | Seq.     | y           | y <sup>++</sup> | y <sup>*</sup> | y <sup>*++</sup> | y <sup>0</sup> | y <sup>0++</sup> | #  |
|----|-------------|-----------------|----------------|------------------|----------------|------------------|----------|-------------|-----------------|----------------|------------------|----------------|------------------|----|
| 1  | 58.028740   | 29.518008       |                |                  |                |                  | <b>G</b> |             |                 |                |                  |                |                  | 12 |
| 2  | 157.097154  | 79.052215       |                |                  |                |                  | <b>V</b> | 1392.679410 | 696.843343      | 1375.652861    | 688.330069       | 1374.668845    | 687.838061       | 11 |
| 3  | 258.144833  | 129.576055      |                |                  | 240.134268     | 120.570772       | <b>T</b> | 1293.610996 | 647.309136      | 1276.584447    | 638.795862       | 1275.600431    | 638.303854       | 10 |
| 4  | 386.203411  | 193.605344      | 369.176862     | 185.092069       | 368.192846     | 184.600061       | <b>Q</b> | 1192.563317 | 596.785297      | 1175.536768    | 588.272022       | 1174.552752    | 587.780014       | 9  |
| 5  | 549.266740  | 275.137008      | 532.240191     | 266.623734       | 531.256175     | 266.131726       | <b>Y</b> | 1064.504739 | 532.756008      | 1047.478190    | 524.242733       | 1046.494174    | 523.750725       | 8  |
| 6  | 712.330069  | 356.668673      | 695.303520     | 348.155398       | 694.319504     | 347.663390       | <b>Y</b> | 901.441410  | 451.224343      | 884.414861     | 442.711069       | 883.430845     | 442.219061       | 7  |
| 7  | 783.367183  | 392.187230      | 766.340634     | 383.673955       | 765.356618     | 383.181947       | <b>A</b> | 738.378081  | 369.692679      | 721.351532     | 361.179404       | 720.367516     | 360.687396       | 6  |
| 8  | 946.430512  | 473.718894      | 929.403963     | 465.205620       | 928.419947     | 464.713612       | <b>Y</b> | 667.340967  | 334.174122      | 650.314418     | 325.660847       | 649.330402     | 325.168839       | 5  |
| 9  | 1045.498926 | 523.253101      | 1028.472377    | 514.739827       | 1027.488361    | 514.247819       | <b>V</b> | 504.277638  | 252.642457      | 487.251089     | 244.129183       | 486.267073     | 243.637175       | 4  |
| 10 | 1146.546605 | 573.776941      | 1129.520056    | 565.263666       | 1128.536040    | 564.771658       | <b>T</b> | 405.209224  | 203.108250      | 388.182675     | 194.594976       | 387.198659     | 194.102968       | 3  |
| 11 | 1275.589198 | 638.298237      | 1258.562649    | 629.784963       | 1257.578633    | 629.292955       | <b>E</b> | 304.161545  | 152.584411      | 287.134996     | 144.071136       | 286.150980     | 143.579128       | 2  |
| 12 |             |                 |                |                  |                |                  | <b>R</b> | 175.118952  | 88.063114       | 158.092403     | 79.549839        |                |                  | 1  |

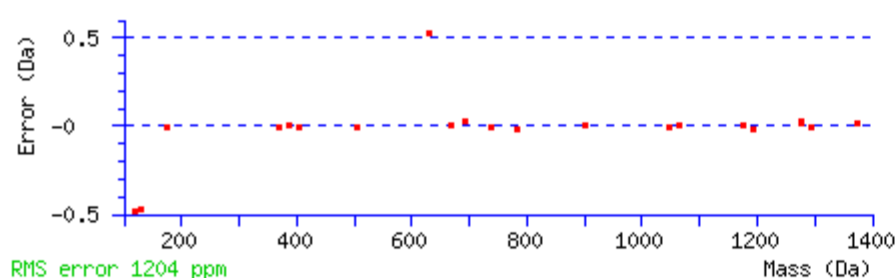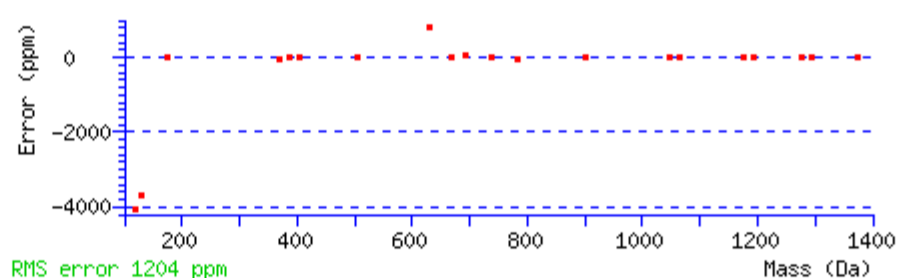

NCBI BLAST search of **GVTQYYAYVTER**

(Parameters: blastp, nr protein database, expect=20000, no filter, PAM30)

Other BLAST [web gateways](#)

All matches to this query

| Score | Mr(calc):   | Delta    | Sequence                      |
|-------|-------------|----------|-------------------------------|
| 31.9  | 1448.693588 | 0.000820 | <a href="#">GVTQYYAYVTER</a>  |
| 0.3   | 1448.685547 | 0.008861 | <a href="#">QKSPAQSDSTTQR</a> |

# MASCOT Search Results

## Peptide View

### MS/MS Fragmentation of LPAIFFLFK

Found in **DDX6L\_HUMAN**, Probable ATP-dependent RNA helicase DDX60-like OS=Homo sapiens GN=DDX60L PE=2 SV=2

Match to Query 22638: 1094.652148 from(548.333350,2+) rtinseconds(4509) index(65925)

Title: Locus:1.1.1.3100.8

Data file 2011-11-14 - TFD - EP 8-1.mgf

Click mouse within plot area to zoom in by factor of two about that point

Or, Plot from  to  Da

Label all possible matches  Label matches used for scoring

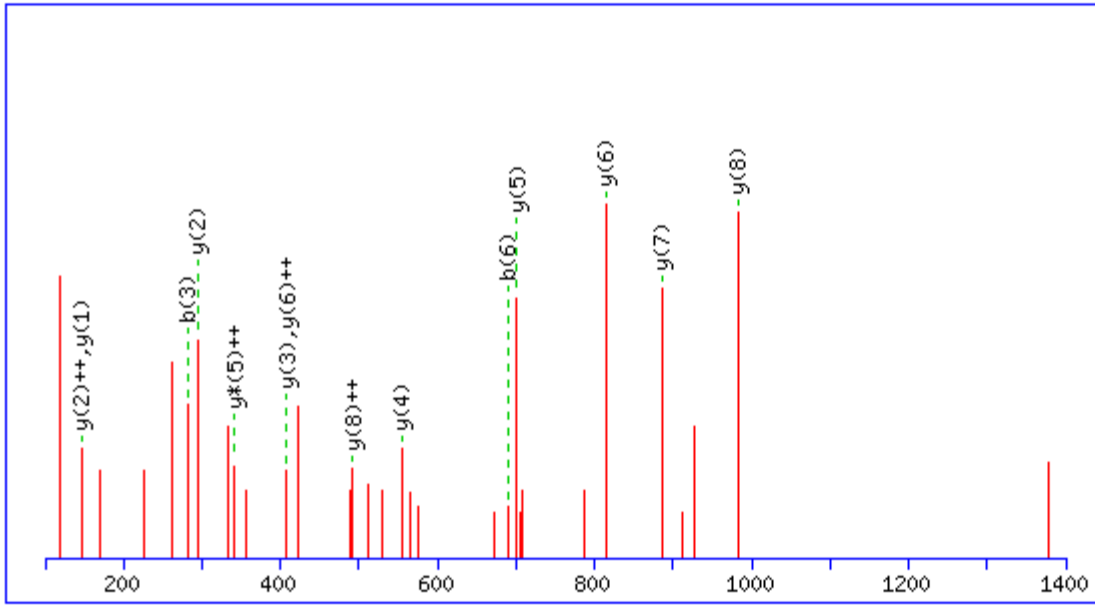

Monoisotopic mass of neutral peptide Mr(calc): 1094.652832

Fixed modifications: Propionamide (C) (apply to specified residues or termini only)

Ions Score: 59 Expect: 3.8e-006

Matches : 14/48 fragment ions using 24 most intense peaks ([help](#))

| # | b                 | b <sup>++</sup> | Seq. | y                 | y <sup>++</sup>   | y*         | y <sup>*++</sup>  | # |
|---|-------------------|-----------------|------|-------------------|-------------------|------------|-------------------|---|
| 1 | 114.091340        | 57.549308       | L    |                   |                   |            |                   | 9 |
| 2 | 211.144104        | 106.075690      | P    | <b>982.576052</b> | <b>491.791664</b> | 965.549503 | 483.278390        | 8 |
| 3 | <b>282.181218</b> | 141.594247      | A    | <b>885.523288</b> | 443.265282        | 868.496739 | 434.752008        | 7 |
| 4 | 395.265282        | 198.136279      | I    | <b>814.486174</b> | <b>407.746725</b> | 797.459625 | 399.233451        | 6 |
| 5 | 542.333696        | 271.670486      | F    | <b>701.402110</b> | 351.204693        | 684.375561 | <b>342.691419</b> | 5 |
| 6 | <b>689.402110</b> | 345.204693      | F    | <b>554.333696</b> | 277.670486        | 537.307147 | 269.157212        | 4 |
| 7 | 802.486174        | 401.746725      | L    | <b>407.265282</b> | 204.136279        | 390.238733 | 195.623004        | 3 |
| 8 | 949.554588        | 475.280932      | F    | <b>294.181218</b> | <b>147.594247</b> | 277.154669 | 139.080972        | 2 |
| 9 |                   |                 | K    | <b>147.112804</b> | 74.060040         | 130.086255 | 65.546765         | 1 |

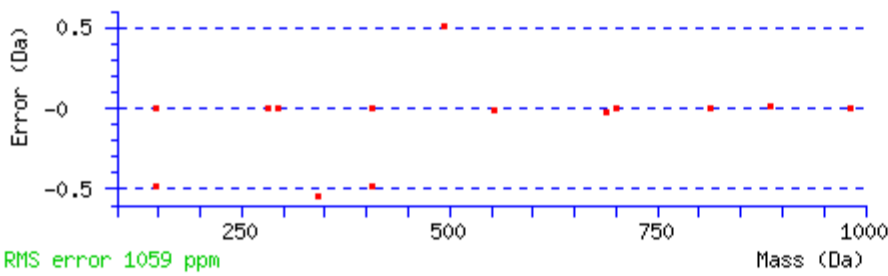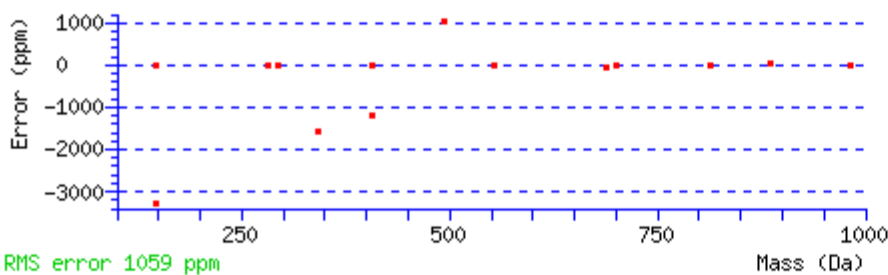

### NCBI BLAST search of LPAIFFLFK

(Parameters: blastp, nr protein database, expect=20000, no filter, PAM30)

Other BLAST [web gateways](#)

### All matches to this query

| Score | Mr(calc):   | Delta     | Sequence                   |
|-------|-------------|-----------|----------------------------|
| 59.1  | 1094.652832 | -0.000684 | <a href="#">LPAIFFLFK</a>  |
| 59.1  | 1094.652832 | -0.000684 | <a href="#">LPALFFLFK</a>  |
| 8.7   | 1094.644775 | 0.007373  | <a href="#">IPAPVEKSVR</a> |

**MATRIX SCIENCE Mascot Search Results**

**Peptide View**

MS/MS Fragmentation of **SVAWAPSGNLLATCSR**

Found in **CIAO1\_HUMAN**, Probable cytosolic iron-sulfur protein assembly protein CIAO1 OS=Homo sapiens GN=CIAO1 PE=1 SV=1

Match to Query 54833: 1702.850168 from(852.432360,2+) rtinseconds(2898) index(39565)

Title: Locus:1.1.1.2444.46

Data file 2011-11-10 - TFD - EP 3-4.mgf

Click mouse within plot area to zoom in by factor of two about that point

Or, Plot from  to  Da

Label all possible matches  Label matches used for scoring

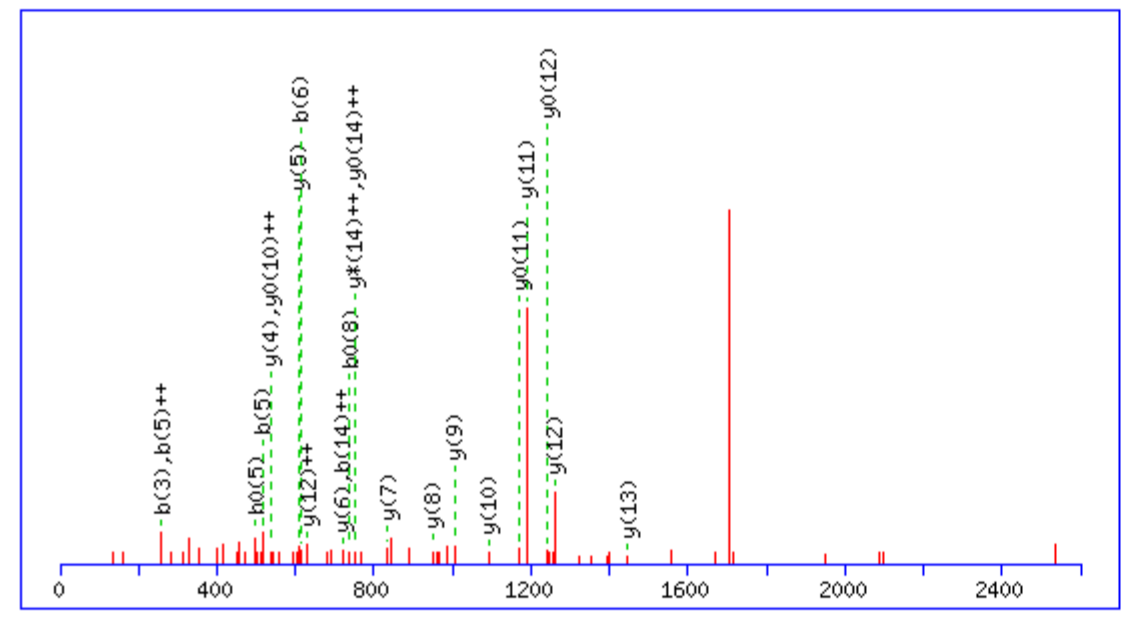

Monoisotopic mass of neutral peptide Mr(calc): 1702.846069

Fixed modifications: Propionamide (C) (apply to specified residues or termini only)

Ions Score: 48 Expect: 8.6e-005

Matches : 23/162 fragment ions using 48 most intense peaks [\(help\)](#)

| #  | b                 | b <sup>++</sup>   | b <sup>*</sup> | b <sup>+++</sup> | b <sup>0</sup>    | b <sup>0++</sup> | Seq. | y                  | y <sup>++</sup>   | y <sup>*</sup> | y <sup>+++</sup>  | y <sup>0</sup>     | y <sup>0++</sup>  | #  |
|----|-------------------|-------------------|----------------|------------------|-------------------|------------------|------|--------------------|-------------------|----------------|-------------------|--------------------|-------------------|----|
| 1  | 88.039304         | 44.523290         |                |                  | 70.028739         | 35.518008        | S    |                    |                   |                |                   |                    |                   | 16 |
| 2  | 187.107718        | 94.057497         |                |                  | 169.097153        | 85.052214        | V    | 1616.821338        | 808.914307        | 1599.794789    | 800.401033        | 1598.810773        | 799.909025        | 15 |
| 3  | <b>258.144832</b> | 129.576054        |                |                  | 240.134267        | 120.570772       | A    | 1517.752924        | 759.380100        | 1500.726375    | <b>750.866826</b> | 1499.742359        | <b>750.374818</b> | 14 |
| 4  | 444.224145        | 222.615711        |                |                  | 426.213580        | 213.610428       | W    | <b>1446.715810</b> | 723.861543        | 1429.689261    | 715.348269        | 1428.705245        | 714.856261        | 13 |
| 5  | <b>515.261259</b> | <b>258.134268</b> |                |                  | <b>497.250694</b> | 249.128985       | A    | <b>1260.636497</b> | <b>630.821887</b> | 1243.609948    | 622.308612        | <b>1242.625932</b> | 621.816604        | 12 |
| 6  | <b>612.314023</b> | 306.660650        |                |                  | 594.303458        | 297.655367       | P    | <b>1189.599383</b> | 595.303330        | 1172.572834    | 586.790055        | <b>1171.588818</b> | 586.298047        | 11 |
| 7  | 699.346051        | 350.176664        |                |                  | 681.335486        | 341.171381       | S    | <b>1092.546619</b> | 546.776948        | 1075.520070    | 538.263673        | 1074.536054        | <b>537.771665</b> | 10 |
| 8  | 756.367515        | 378.687396        |                |                  | <b>738.356950</b> | 369.682113       | G    | <b>1005.514591</b> | 503.260934        | 988.488042     | 494.747659        | 987.504026         | 494.255651        | 9  |
| 9  | 870.410442        | 435.708859        | 853.383893     | 427.195585       | 852.399877        | 426.703577       | N    | <b>948.493127</b>  | 474.750202        | 931.466578     | 466.236927        | 930.482562         | 465.744919        | 8  |
| 10 | 983.494506        | 492.250891        | 966.467957     | 483.737617       | 965.483941        | 483.245609       | L    | <b>834.450200</b>  | 417.728738        | 817.423651     | 409.215464        | 816.439635         | 408.723456        | 7  |
| 11 | 1096.578570       | 548.792923        | 1079.552021    | 540.279649       | 1078.568005       | 539.787641       | L    | <b>721.366136</b>  | 361.186706        | 704.339587     | 352.673432        | 703.355571         | 352.181424        | 6  |
| 12 | 1167.615684       | 584.311480        | 1150.589135    | 575.798206       | 1149.605119       | 575.306198       | A    | <b>608.282072</b>  | 304.644674        | 591.255523     | 296.131400        | 590.271507         | 295.639392        | 5  |
| 13 | 1268.663363       | 634.835320        | 1251.636814    | 626.322045       | 1250.652798       | 625.830037       | T    | <b>537.244958</b>  | 269.126117        | 520.218409     | 260.612843        | 519.234393         | 260.120835        | 4  |
| 14 | 1442.709662       | <b>721.858469</b> | 1425.683113    | 713.345195       | 1424.699097       | 712.853187       | C    | 436.197279         | 218.602278        | 419.170730     | 210.089003        | 418.186714         | 209.596995        | 3  |
| 15 | 1529.741690       | 765.374483        | 1512.715141    | 756.861209       | 1511.731125       | 756.369201       | S    | 262.150980         | 131.579128        | 245.124431     | 123.065854        | 244.140415         | 122.573846        | 2  |
| 16 |                   |                   |                |                  |                   |                  | R    | 175.118952         | 88.063114         | 158.092403     | 79.549839         |                    |                   | 1  |

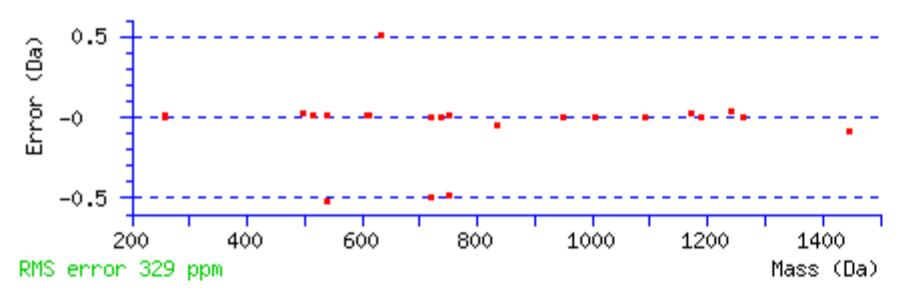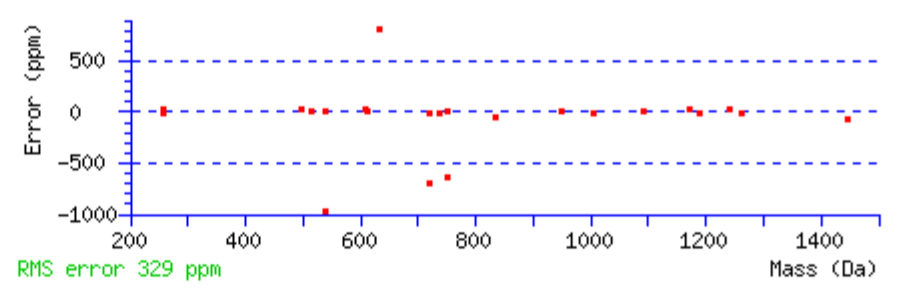

NCBI BLAST search of **SVAWAPSGNLLATCSR**

(Parameters: blastp, nr protein database, expect=20000, no filter, PAM30)

Other BLAST [web gateways](#)

**All matches to this query**

| Score | Mr(calc):   | Delta     | Sequence                           |
|-------|-------------|-----------|------------------------------------|
| 48.3  | 1702.846069 | 0.004099  | <a href="#">SVAWAPSGNLLATCSR</a>   |
| 4.6   | 1702.855957 | -0.005789 | <a href="#">VASALPGMENVQEKSK</a>   |
| 2.5   | 1702.863815 | -0.013647 | <a href="#">EQYILATQQNNLPR</a>     |
| 0.2   | 1702.849426 | 0.000742  | <a href="#">ALAKMMGGAGPGSSLEAR</a> |

**MATRIX SCIENCE Mascot Search Results**

**Peptide View**

MS/MS Fragmentation of **YLEVEPVSR**

Found in **ERG28\_HUMAN**, Probable ergosterol biosynthetic protein 28 OS=Homo sapiens GN=C14orf1 PE=1 SV=1

Match to Query 20771: 1090.564428 from(546.289490,2+) rtinseconds(1938) index(15228)

Title: Locus:1.1.1.2189.25

Data file 2011-11-13 - TFD - EP 7-7.mgf

Click mouse within plot area to zoom in by factor of two about that point

Or, Plot from  to  Da

Label all possible matches  Label matches used for scoring

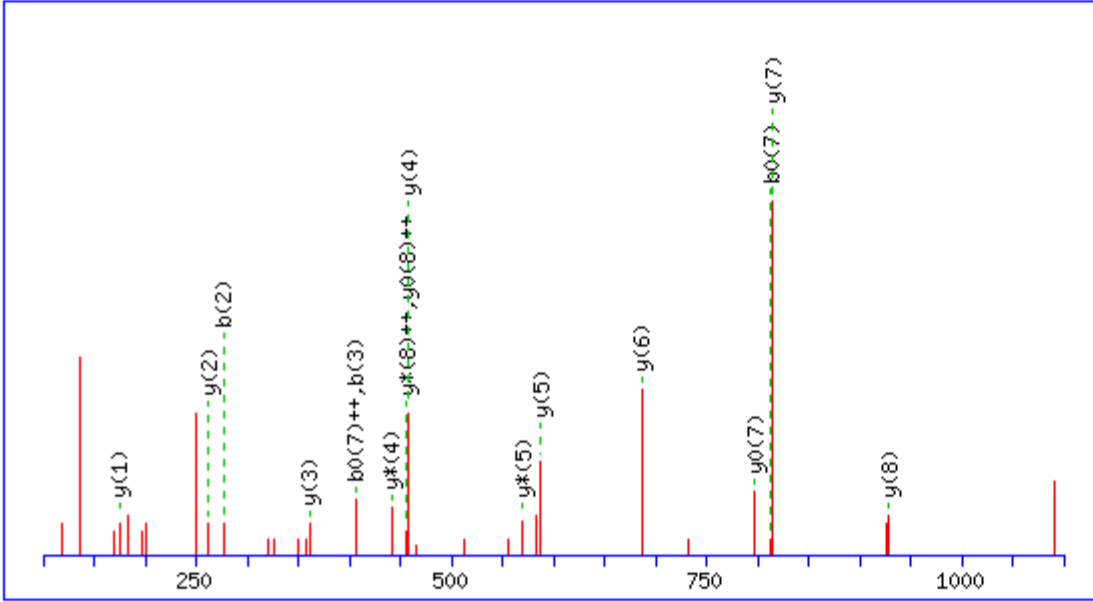

Monoisotopic mass of neutral peptide Mr(calc): 1090.565857

Fixed modifications: Propionamide (C) (apply to specified residues or termini only)

Ions Score: 71 Expect: 1.1e-006

Matches : 17/74 fragment ions using 21 most intense peaks [\(help\)](#)

| # | b                 | b <sup>++</sup> | b <sup>0</sup>    | b <sup>0++</sup>  | Seq. | y                 | y <sup>++</sup> | y*                | y <sup>*++</sup>  | y <sup>0</sup>    | y <sup>0++</sup>  | # |
|---|-------------------|-----------------|-------------------|-------------------|------|-------------------|-----------------|-------------------|-------------------|-------------------|-------------------|---|
| 1 | 164.070605        | 82.538940       |                   |                   | Y    |                   |                 |                   |                   |                   |                   | 9 |
| 2 | <b>277.154669</b> | 139.080973      |                   |                   | L    | <b>928.509822</b> | 464.758549      | 911.483273        | <b>456.245274</b> | 910.499257        | <b>455.753267</b> | 8 |
| 3 | <b>406.197262</b> | 203.602269      | 388.186697        | 194.596987        | E    | <b>815.425758</b> | 408.216517      | 798.399209        | 399.703243        | <b>797.415193</b> | 399.211235        | 7 |
| 4 | 505.265676        | 253.136476      | 487.255111        | 244.131194        | V    | <b>686.383165</b> | 343.695221      | 669.356616        | 335.181946        | 668.372600        | 334.689938        | 6 |
| 5 | 634.308269        | 317.657773      | 616.297704        | 308.652490        | E    | <b>587.314751</b> | 294.161014      | <b>570.288202</b> | 285.647739        | 569.304186        | 285.155731        | 5 |
| 6 | 731.361033        | 366.184155      | 713.350468        | 357.178872        | P    | <b>458.272158</b> | 229.639717      | <b>441.245609</b> | 221.126442        | 440.261593        | 220.634434        | 4 |
| 7 | 830.429447        | 415.718362      | <b>812.418882</b> | <b>406.713079</b> | V    | <b>361.219394</b> | 181.113335      | 344.192845        | 172.600060        | 343.208829        | 172.108052        | 3 |
| 8 | 917.461475        | 459.234376      | 899.450910        | 450.229093        | S    | <b>262.150980</b> | 131.579128      | 245.124431        | 123.065853        | 244.140415        | 122.573845        | 2 |
| 9 |                   |                 |                   |                   | R    | <b>175.118952</b> | 88.063114       | 158.092403        | 79.549839         |                   |                   | 1 |

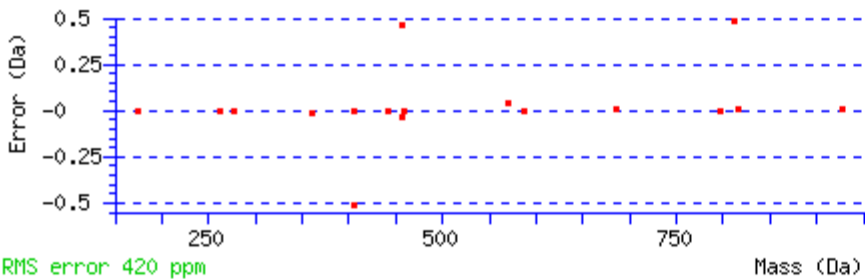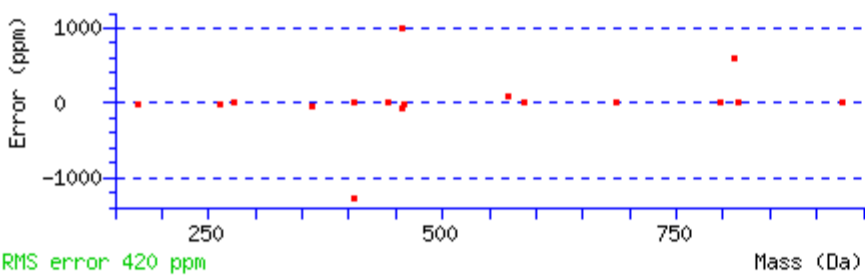

NCBI BLAST search of **YLEVEPVSR**

(Parameters: blastp, nr protein database, expect=20000, no filter, PAM30)

Other BLAST [web gateways](#)

**All matches to this query**

| Score | Mr(calc):   | Delta     | Sequence                   |
|-------|-------------|-----------|----------------------------|
| 70.8  | 1090.565857 | -0.001429 | <a href="#">YLEVEPVSR</a>  |
| 14.7  | 1090.569229 | -0.004801 | <a href="#">VLSGPMEKAK</a> |
| 12.7  | 1090.559326 | 0.005102  | <a href="#">YLPALQGCR</a>  |
| 5.3   | 1090.555969 | 0.008459  | <a href="#">YLFVEHQQR</a>  |
| 4.1   | 1090.555969 | 0.008459  | <a href="#">YLFHEVQR</a>   |
| 2.3   | 1090.573944 | -0.009516 | <a href="#">VARIMVCGR</a>  |
| 2.2   | 1090.567184 | -0.002756 | <a href="#">YNARFPPAR</a>  |
| 1.9   | 1090.565857 | -0.001429 | <a href="#">YDGPPIELR</a>  |



# **MATRIX** SCIENCE Mascot Search Results

## Peptide View

MS/MS Fragmentation of **KPDVPLYK**

Found in **ASHIL\_HUMAN**, Probable histone-lysine N-methyltransferase ASH1L OS=Homo sapiens GN=ASH1L PE=1 SV=2

Match to Query 13397: 974.545668 from(488.280110,2+) rtinseconds(2208) index(26940)

Title: Locus:1.1.1.2168.11

Data file 2011-11-10 - TFD - EP 4-4.mgf

Click mouse within plot area to zoom in by factor of two about that point

Or, Plot from  to  Da

Label all possible matches  Label matches used for scoring

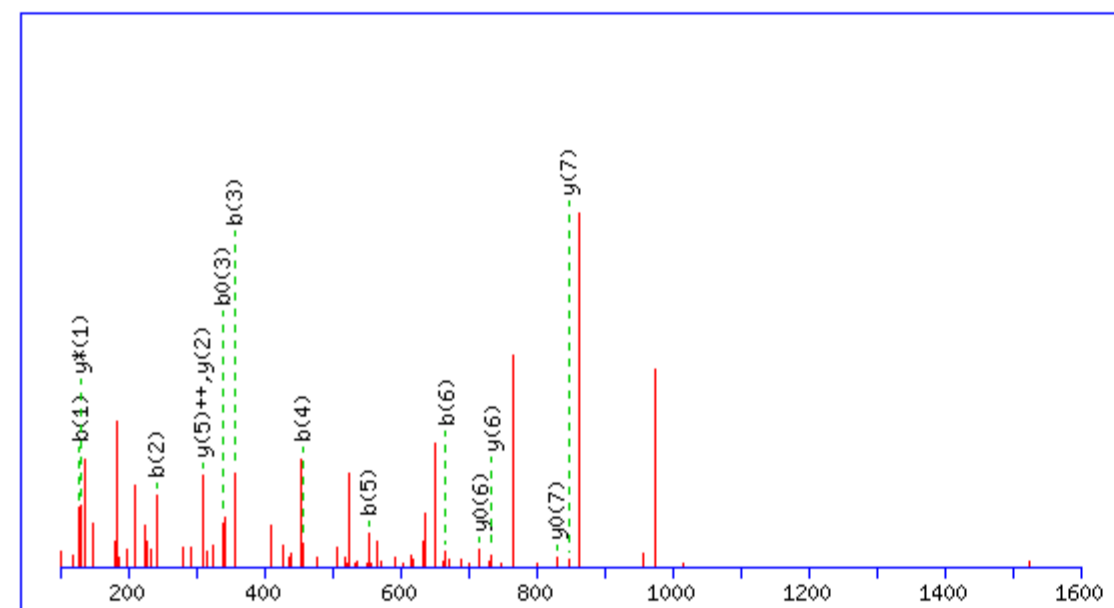

Monoisotopic mass of neutral peptide Mr(calc): 974.543671

Fixed modifications: Propionamide (C) (apply to specified residues or termini only)

Variable modifications:

P2 : Oxidation (P)

Ions Score: 36 Expect: 0.0024

Matches : 15/70 fragment ions using 33 most intense peaks ([help](#))

| # | b                 | b <sup>++</sup> | b <sup>*</sup> | b <sup>*++</sup> | b <sup>0</sup>    | b <sup>0++</sup> | Seq.     | y                 | y <sup>++</sup>   | y <sup>*</sup>    | y <sup>*++</sup> | y <sup>0</sup>    | y <sup>0++</sup> | # |
|---|-------------------|-----------------|----------------|------------------|-------------------|------------------|----------|-------------------|-------------------|-------------------|------------------|-------------------|------------------|---|
| 1 | <b>129.102239</b> | 65.054757       | 112.075690     | 56.541483        |                   |                  | <b>K</b> |                   |                   |                   |                  |                   |                  | 8 |
| 2 | <b>242.149918</b> | 121.578597      | 225.123369     | 113.065322       |                   |                  | <b>P</b> | <b>847.455997</b> | 424.231637        | 830.429448        | 415.718362       | <b>829.445432</b> | 415.226354       | 7 |
| 3 | <b>357.176861</b> | 179.092068      | 340.150312     | 170.578794       | <b>339.166296</b> | 170.086786       | <b>D</b> | <b>734.408318</b> | 367.707797        | 717.381769        | 359.194523       | <b>716.397753</b> | 358.702515       | 6 |
| 4 | <b>456.245275</b> | 228.626275      | 439.218726     | 220.113001       | 438.234710        | 219.620993       | <b>V</b> | 619.381375        | <b>310.194326</b> | 602.354826        | 301.681051       |                   |                  | 5 |
| 5 | <b>553.298039</b> | 277.152658      | 536.271490     | 268.639383       | 535.287474        | 268.147375       | <b>P</b> | 520.312961        | 260.660119        | 503.286412        | 252.146844       |                   |                  | 4 |
| 6 | <b>666.382103</b> | 333.694690      | 649.355554     | 325.181415       | 648.371538        | 324.689407       | <b>L</b> | 423.260197        | 212.133736        | 406.233648        | 203.620462       |                   |                  | 3 |
| 7 | <b>829.445432</b> | 415.226354      | 812.418883     | 406.713079       | 811.434867        | 406.221071       | <b>Y</b> | <b>310.176133</b> | 155.591704        | 293.149584        | 147.078430       |                   |                  | 2 |
| 8 |                   |                 |                |                  |                   |                  | <b>K</b> | 147.112804        | 74.060040         | <b>130.086255</b> | 65.546765        |                   |                  | 1 |

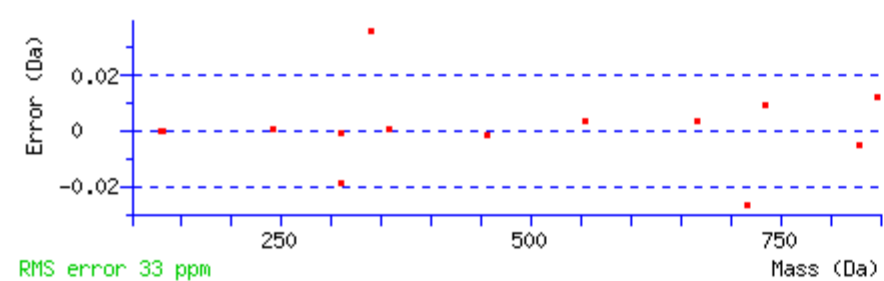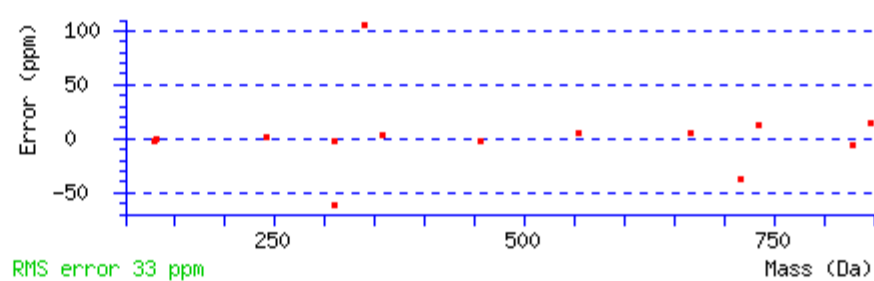

NCBI BLAST search of [KPDVPLYK](#)

(Parameters: blastp, nr protein database, expect=20000, no filter, PAM30)

Other BLAST [web gateways](#)

## All matches to this query

| Score | Mr(calc):  | Delta     | Sequence                 |
|-------|------------|-----------|--------------------------|
| 42.4  | 974.543671 | 0.001997  | <a href="#">LPLQDVYK</a> |
| 36.2  | 974.543671 | 0.001997  | <a href="#">KPDVPLYK</a> |
| 22.6  | 974.543671 | 0.001997  | <a href="#">QLDVLYPK</a> |
| 21.0  | 974.547043 | -0.001375 | <a href="#">MPIVDKLK</a> |
| 20.2  | 974.543686 | 0.001982  | <a href="#">QLDFLPVK</a> |
| 19.5  | 974.543671 | 0.001997  | <a href="#">QDVYLLPK</a> |
| 17.4  | 974.554916 | -0.009248 | <a href="#">TVRVYPYK</a> |
| 16.6  | 974.554901 | -0.009233 | <a href="#">KLDFPALR</a> |
| 14.1  | 974.543671 | 0.001997  | <a href="#">KPDVPLYK</a> |
| 13.6  | 974.543671 | 0.001997  | <a href="#">INLPDFLK</a> |

**MATRIX SCIENCE Mascot Search Results**

**Peptide View**

MS/MS Fragmentation of **LKDWPSGEDFK**

Found in **JHD2C\_HUMAN**, Probable JmjC domain-containing histone demethylation protein 2C OS=Homo sapiens GN=JMJD1C PE=1 SV=2

Match to Query 663738: 1320.634008 from(661.324280,2+) rtinseconds(2279) index(760703)  
Title: Locus:1.1.1.1214.33

Data file C:\Program Files (x86)\Matrix Science\Mascot Daemon\mgf3 TFD - Epitel - R2\mascot\_daemon\_merge.mgf

Click mouse within plot area to zoom in by factor of two about that point

Or, Plot from  to  Da

Label all possible matches  Label matches used for scoring

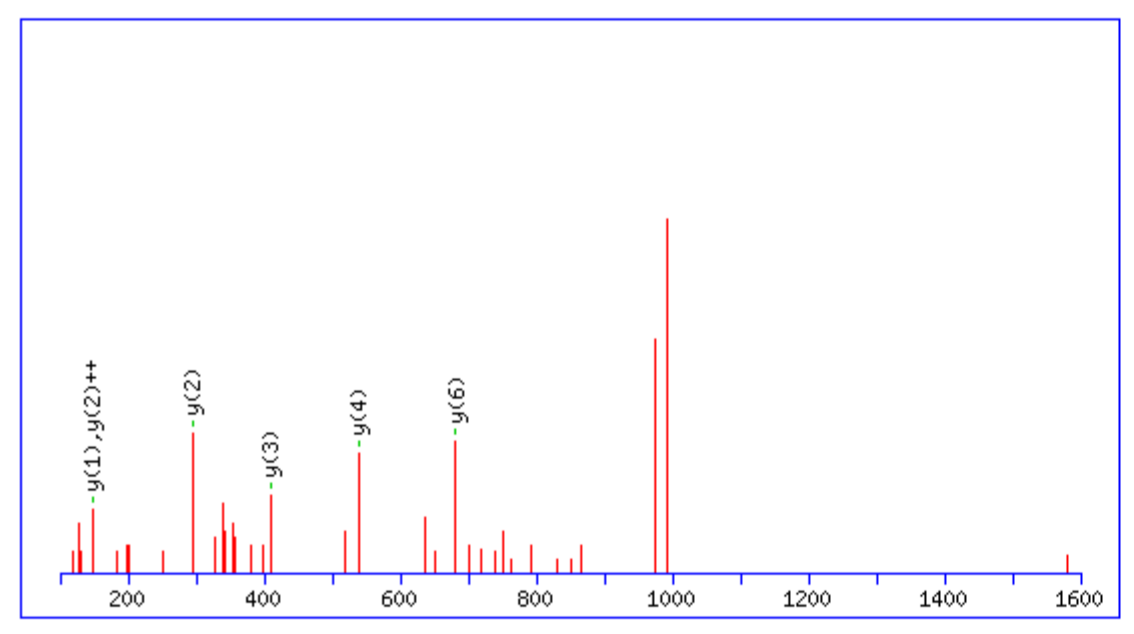

Monoisotopic mass of neutral peptide Mr(calc): 1320.635010

Fixed modifications: Carbamidomethyl (C) (apply to specified residues or termini only)

Ions Score: 32 Expect: 0.0039

Matches : 6/110 fragment ions using 8 most intense peaks [\(help\)](#)

| #  | b           | b <sup>++</sup> | b <sup>*</sup> | b <sup>*++</sup> | b <sup>0</sup> | b <sup>0++</sup> | Seq. | y                 | y <sup>++</sup>   | y <sup>*</sup> | y <sup>*++</sup> | y <sup>0</sup> | y <sup>0++</sup> | #  |
|----|-------------|-----------------|----------------|------------------|----------------|------------------|------|-------------------|-------------------|----------------|------------------|----------------|------------------|----|
| 1  | 114.091340  | 57.549308       |                |                  |                |                  | L    |                   |                   |                |                  |                |                  | 11 |
| 2  | 242.186303  | 121.596790      | 225.159754     | 113.083515       |                |                  | K    | 1208.558229       | 604.782753        | 1191.531680    | 596.269478       | 1190.547664    | 595.777470       | 10 |
| 3  | 357.213246  | 179.110261      | 340.186697     | 170.596987       | 339.202681     | 170.104979       | D    | 1080.463266       | 540.735271        | 1063.436717    | 532.221997       | 1062.452701    | 531.729989       | 9  |
| 4  | 543.292559  | 272.149918      | 526.266010     | 263.636643       | 525.281994     | 263.144635       | W    | 965.436323        | 483.221800        | 948.409774     | 474.708525       | 947.425758     | 474.216517       | 8  |
| 5  | 640.345323  | 320.676300      | 623.318774     | 312.163025       | 622.334758     | 311.671017       | P    | 779.357010        | 390.182143        | 762.330461     | 381.668869       | 761.346445     | 381.176861       | 7  |
| 6  | 727.377351  | 364.192314      | 710.350802     | 355.679039       | 709.366786     | 355.187031       | S    | <b>682.304246</b> | 341.655761        | 665.277697     | 333.142487       | 664.293681     | 332.650479       | 6  |
| 7  | 784.398815  | 392.703046      | 767.372266     | 384.189771       | 766.388250     | 383.697763       | G    | 595.272218        | 298.139747        | 578.245669     | 289.626473       | 577.261653     | 289.134465       | 5  |
| 8  | 913.441408  | 457.224342      | 896.414859     | 448.711068       | 895.430843     | 448.219060       | E    | <b>538.250754</b> | 269.629015        | 521.224205     | 261.115741       | 520.240189     | 260.623733       | 4  |
| 9  | 1028.468351 | 514.737814      | 1011.441802    | 506.224539       | 1010.457786    | 505.732531       | D    | <b>409.208161</b> | 205.107719        | 392.181612     | 196.594444       | 391.197596     | 196.102436       | 3  |
| 10 | 1175.536765 | 588.272021      | 1158.510216    | 579.758746       | 1157.526200    | 579.266738       | F    | <b>294.181218</b> | <b>147.594247</b> | 277.154669     | 139.080973       |                |                  | 2  |
| 11 |             |                 |                |                  |                |                  | K    | <b>147.112804</b> | 74.060040         | 130.086255     | 65.546765        |                |                  | 1  |

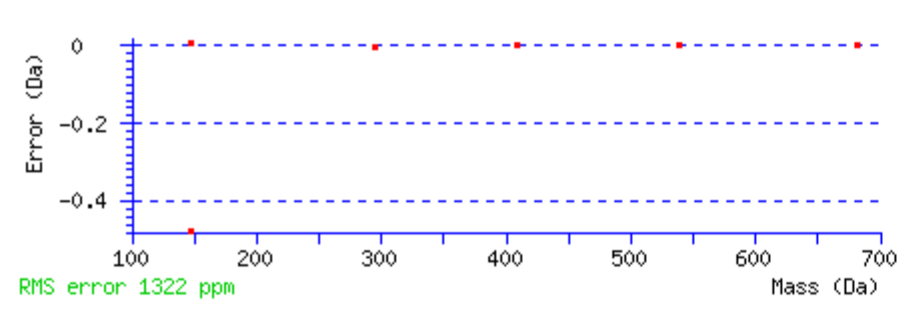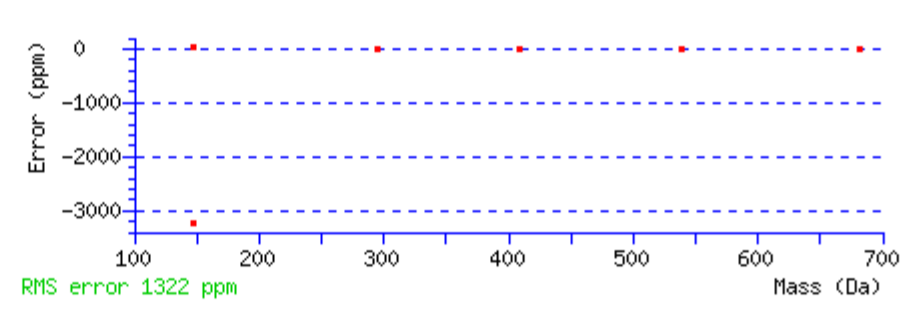

NCBI BLAST search of **LKDWPSGEDFK**

(Parameters: blastp, nr protein database, expect=20000, no filter, PAM30)

Other BLAST [web gateways](#)

**All matches to this query**

| Score | Mr(calc):   | Delta     | Sequence                     |
|-------|-------------|-----------|------------------------------|
| 31.8  | 1320.635010 | -0.001002 | <a href="#">LKDWPSGEDFK</a>  |
| 5.8   | 1320.635712 | -0.001704 | <a href="#">RVSPSPCPPHR</a>  |
| 5.7   | 1320.638397 | -0.004389 | <a href="#">TPQPPPPSPPMK</a> |
| 4.5   | 1320.627136 | 0.006872  | <a href="#">MDPPSEIYPLK</a>  |
| 3.3   | 1320.627136 | 0.006872  | <a href="#">MDPPSEIYPLK</a>  |
| 2.5   | 1320.627136 | 0.006872  | <a href="#">MDPPSEIYPLK</a>  |
| 1.3   | 1320.623123 | 0.010885  | <a href="#">GVAINMVTEEDK</a> |
| 1.1   | 1320.642242 | -0.008234 | <a href="#">PGQPPSSGTPQR</a> |

# **MATRIX** SCIENCE Mascot Search Results

## Peptide View

MS/MS Fragmentation of **TPAYIPIR**

Found in **GT251\_HUMAN**, Procollagen galactosyltransferase 1 OS=Homo sapiens GN=GLT25D1 PE=1 SV=1

Match to Query 10557: 929.532988 from(465.773770,2+) rtinseconds(2069) index(23731)

Title: Locus:1.1.1.2230.14

Data file 2011-11-10 - TFD - EP 3-2.mgf

Click mouse within plot area to zoom in by factor of two about that point

Or, Plot from  to  Da

Label all possible matches  Label matches used for scoring

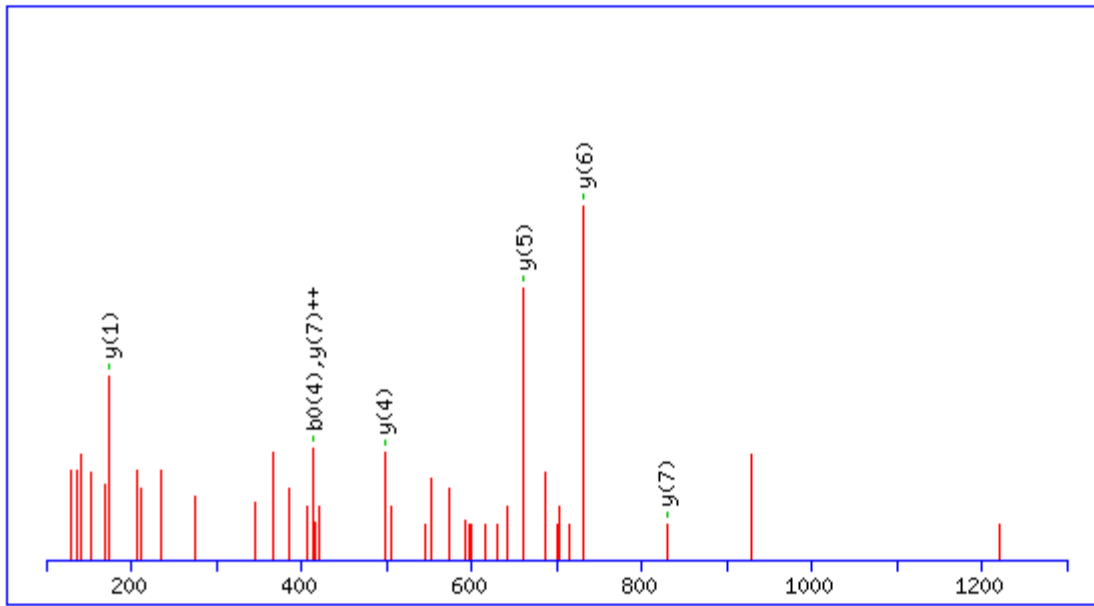

Monoisotopic mass of neutral peptide Mr(calc): 929.533432

Fixed modifications: Propionamide (C) (apply to specified residues or termini only)

Ions Score: 37 Expect: 0.0021

Matches : 7/56 fragment ions using 8 most intense peaks ([help](#))

| # | b          | b <sup>++</sup> | b <sup>0</sup> | b <sup>0++</sup> | Seq. | y          | y <sup>++</sup> | y <sup>*</sup> | y <sup>*++</sup> | # |
|---|------------|-----------------|----------------|------------------|------|------------|-----------------|----------------|------------------|---|
| 1 | 102.054955 | 51.531116       | 84.044390      | 42.525833        | T    |            |                 |                |                  | 8 |
| 2 | 199.107719 | 100.057497      | 181.097154     | 91.052215        | P    | 829.493051 | 415.250164      | 812.466502     | 406.736889       | 7 |
| 3 | 270.144833 | 135.576055      | 252.134268     | 126.570772       | A    | 732.440287 | 366.723782      | 715.413738     | 358.210507       | 6 |
| 4 | 433.208162 | 217.107719      | 415.197597     | 208.102437       | Y    | 661.403173 | 331.205225      | 644.376624     | 322.691950       | 5 |
| 5 | 546.292226 | 273.649751      | 528.281661     | 264.644469       | I    | 498.339844 | 249.673560      | 481.313295     | 241.160286       | 4 |
| 6 | 643.344990 | 322.176133      | 625.334425     | 313.170851       | P    | 385.255780 | 193.131528      | 368.229231     | 184.618254       | 3 |
| 7 | 756.429054 | 378.718165      | 738.418489     | 369.712883       | I    | 288.203016 | 144.605146      | 271.176467     | 136.091872       | 2 |
| 8 |            |                 |                |                  | R    | 175.118952 | 88.063114       | 158.092403     | 79.549840        | 1 |

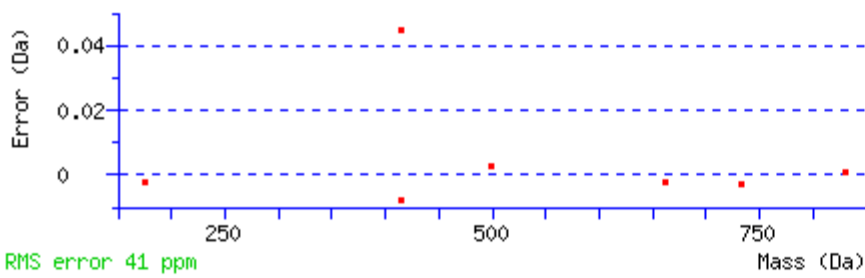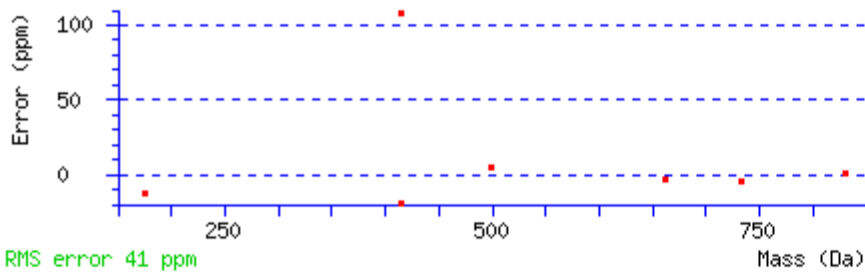

NCBI BLAST search of [TPAYIPIR](#)

(Parameters: blastp, nr protein database, expect=20000, no filter, PAM30)

Other BLAST [web gateways](#)

All matches to this query

| Score | Mr(calc):  | Delta     | Sequence                  |
|-------|------------|-----------|---------------------------|
| 36.7  | 929.533432 | -0.000444 | <a href="#">TPAYIPIR</a>  |
| 10.7  | 929.529434 | 0.003554  | <a href="#">VVATNTLGR</a> |
| 10.2  | 929.536804 | -0.003816 | <a href="#">LLSPLMTR</a>  |
| 2.9   | 929.540649 | -0.007661 | <a href="#">LRAQSVTR</a>  |
| 1.9   | 929.536819 | -0.003831 | <a href="#">MVVLSLPR</a>  |
| 0.8   | 929.540649 | -0.007661 | <a href="#">RPSLKTGR</a>  |
| 0.8   | 929.529419 | 0.003569  | <a href="#">TSINGLLGR</a> |

**MATRIX SCIENCE Mascot Search Results**

**Peptide View**

MS/MS Fragmentation of **DRCPQAGPR**  
 Found in **PRR16\_HUMAN**, Proline-rich protein 16 OS=Homo sapiens GN=PRR16 PE=2 SV=1

Match to Query 356413: 1071.495588 from(536.755070,2+) rtinseconds(1061) index(77773)  
 Title: Locus:1.1.1.1258.22  
 Data file C:\Program Files (x86)\Matrix Science\Mascot Daemon\mgf3 TFD - Epitel - R2\mascot\_daemon\_merge.mgf

Click mouse within plot area to zoom in by factor of two about that point  
 Or, Plot from 150 to 900 Da Full range  
 Label all possible matches  Label matches used for scoring

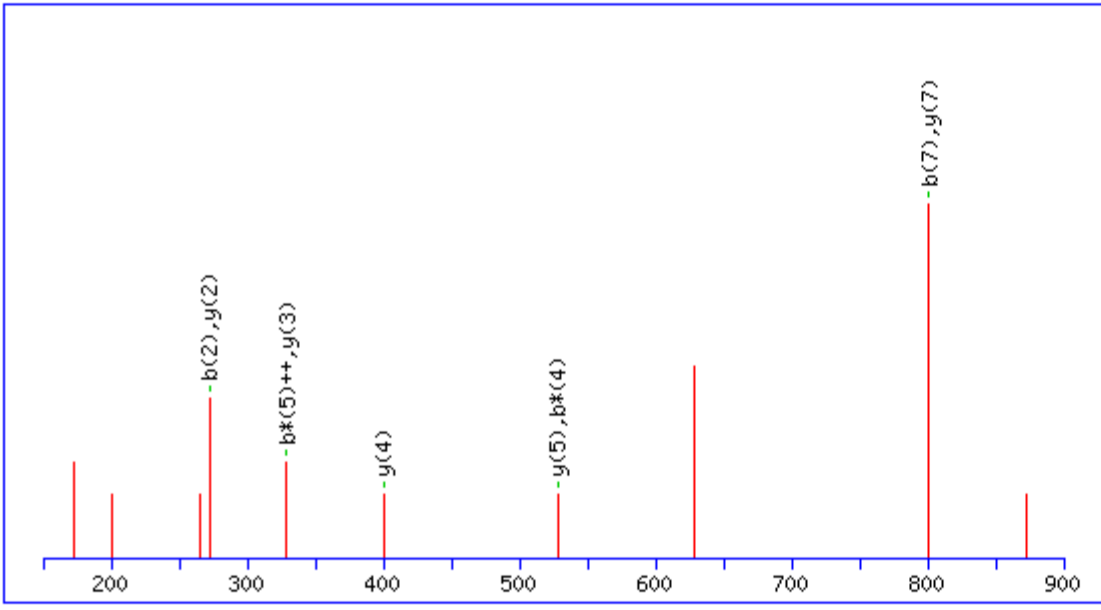

Monoisotopic mass of neutral peptide **Mr(calc)**: 1071.487976  
 Fixed modifications: Carbamidomethyl (C) (apply to specified residues or termini only)  
 Variable modifications:  
 P4 : Oxidation (P)  
 Ions Score: 45 Expect: 0.00028  
 Matches : 9/78 fragment ions using 6 most intense peaks ([help](#))

| # | b                 | b <sup>++</sup> | b <sup>*</sup>    | b <sup>*++</sup>  | b <sup>0</sup> | b <sup>0++</sup> | Seq. | y                 | y <sup>++</sup> | y <sup>*</sup> | y <sup>*++</sup> | # |
|---|-------------------|-----------------|-------------------|-------------------|----------------|------------------|------|-------------------|-----------------|----------------|------------------|---|
| 1 | 116.034219        | 58.520748       |                   |                   | 98.023654      | 49.515465        | D    |                   |                 |                |                  | 9 |
| 2 | <b>272.135330</b> | 136.571303      | 255.108781        | 128.058029        | 254.124765     | 127.566021       | R    | 957.468311        | 479.237794      | 940.441762     | 470.724519       | 8 |
| 3 | 432.165979        | 216.586628      | 415.139430        | 208.073353        | 414.155414     | 207.581345       | C    | <b>801.367200</b> | 401.187238      | 784.340651     | 392.673964       | 7 |
| 4 | 545.213658        | 273.110467      | <b>528.187109</b> | 264.597193        | 527.203093     | 264.105185       | P    | 641.336551        | 321.171914      | 624.310002     | 312.658639       | 6 |
| 5 | 673.272236        | 337.139756      | 656.245687        | <b>328.626482</b> | 655.261671     | 328.134474       | Q    | <b>528.288872</b> | 264.648074      | 511.262323     | 256.134800       | 5 |
| 6 | 744.309350        | 372.658313      | 727.282801        | 364.145039        | 726.298785     | 363.653031       | A    | <b>400.230294</b> | 200.618785      | 383.203745     | 192.105510       | 4 |
| 7 | <b>801.330814</b> | 401.169045      | 784.304265        | 392.655771        | 783.320249     | 392.163763       | G    | <b>329.193180</b> | 165.100228      | 312.166631     | 156.586953       | 3 |
| 8 | 898.383578        | 449.695427      | 881.357029        | 441.182153        | 880.373013     | 440.690145       | P    | <b>272.171716</b> | 136.589496      | 255.145167     | 128.076221       | 2 |
| 9 |                   |                 |                   |                   |                |                  | R    | 175.118952        | 88.063114       | 158.092403     | 79.549839        | 1 |

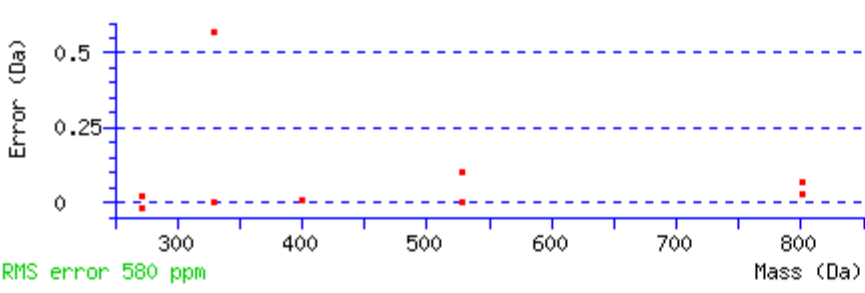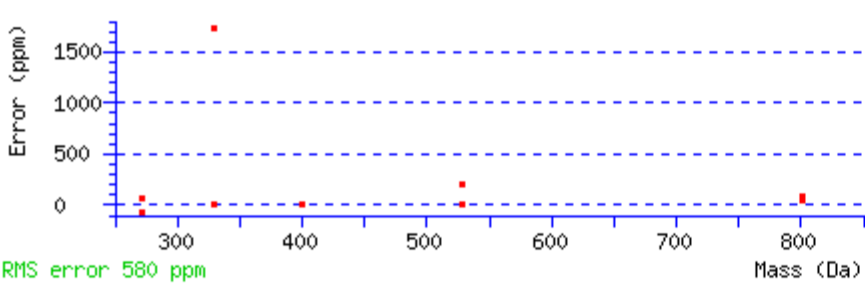

NCBI BLAST search of **DRCPQAGPR**  
 (Parameters: blastp, nr protein database, expect=20000, no filter, PAM30)  
 Other BLAST [web gateways](#)

**All matches to this query**

| Score | Mr(calc):   | Delta     | Sequence                    |
|-------|-------------|-----------|-----------------------------|
| 45.3  | 1071.487976 | 0.007612  | <a href="#">DRCPQAGPR</a>   |
| 21.1  | 1071.501892 | -0.006304 | <a href="#">ISAGPSHVAAM</a> |
| 15.3  | 1071.490646 | 0.004942  | <a href="#">VTAEAPQPM</a>   |
| 12.5  | 1071.494690 | 0.000898  | <a href="#">SPALVYPFM</a>   |
| 5.5   | 1071.501877 | -0.006289 | <a href="#">MEVAPEQPR</a>   |
| 5.5   | 1071.501877 | -0.006289 | <a href="#">MEVAPEQPR</a>   |
| 4.4   | 1071.487976 | 0.007612  | <a href="#">DRCPQAGPR</a>   |
| 4.4   | 1071.501907 | -0.006319 | <a href="#">GDMPPSVTPR</a>  |
| 4.4   | 1071.501907 | -0.006319 | <a href="#">GDMPPSVTPR</a>  |
| 3.8   | 1071.501907 | -0.006319 | <a href="#">GDMPPSVTPR</a>  |

**Peptide View**

MS/MS Fragmentation of **VILDGNSLEK**

Found in **PTGR2\_HUMAN**, Prostaglandin reductase 2 OS=Homo sapiens GN=PTGR2 PE=1 SV=1

Match to Query 22316: 1086.588468 from(544.301510,2+) rtinseconds(1916) index(20996)

Title: Locus:1.1.1.2073.27

Data file 2011-11-10 - TFD - EP 3-4.mgf

Click mouse within plot area to zoom in by factor of two about that point

Or, Plot from  to  Da

Label all possible matches  Label matches used for scoring

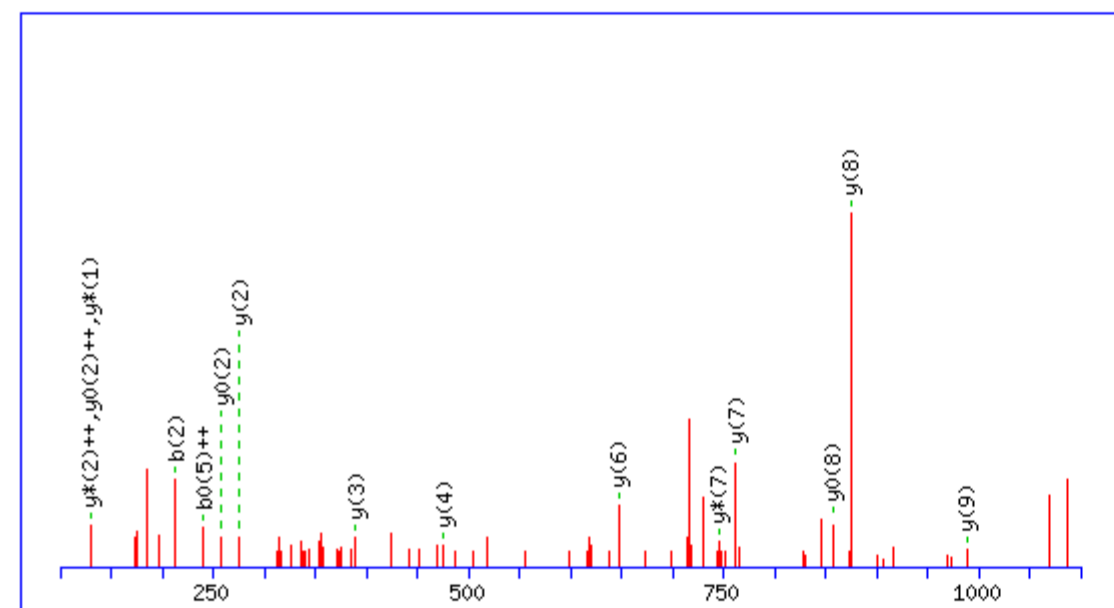

Monoisotopic mass of neutral peptide Mr(calc): 1086.592072

Fixed modifications: Propionamide (C) (apply to specified residues or termini only)

Ions Score: 39 Expect: 0.0029

Matches : 15/90 fragment ions using 28 most intense peaks ([help](#))

| #  | b          | b <sup>++</sup> | b <sup>*</sup> | b <sup>*++</sup> | b <sup>0</sup> | b <sup>0++</sup> | Seq. | y          | y <sup>++</sup> | y <sup>*</sup> | y <sup>*++</sup> | y <sup>0</sup> | y <sup>0++</sup> | #  |
|----|------------|-----------------|----------------|------------------|----------------|------------------|------|------------|-----------------|----------------|------------------|----------------|------------------|----|
| 1  | 100.075690 | 50.541483       |                |                  |                |                  | V    |            |                 |                |                  |                |                  | 10 |
| 2  | 213.159754 | 107.083515      |                |                  |                |                  | I    | 988.530951 | 494.769114      | 971.504402     | 486.255839       | 970.520386     | 485.763831       | 9  |
| 3  | 326.243818 | 163.625547      |                |                  |                |                  | L    | 875.446887 | 438.227082      | 858.420338     | 429.713807       | 857.436322     | 429.221799       | 8  |
| 4  | 441.270761 | 221.139018      |                |                  | 423.260196     | 212.133736       | D    | 762.362823 | 381.685050      | 745.336274     | 373.171775       | 744.352258     | 372.679767       | 7  |
| 5  | 498.292225 | 249.649750      |                |                  | 480.281660     | 240.644468       | G    | 647.335880 | 324.171578      | 630.309331     | 315.658304       | 629.325315     | 315.166296       | 6  |
| 6  | 612.335152 | 306.671214      | 595.308603     | 298.157940       | 594.324587     | 297.665932       | N    | 590.314416 | 295.660846      | 573.287867     | 287.147572       | 572.303851     | 286.655564       | 5  |
| 7  | 699.367180 | 350.187228      | 682.340631     | 341.673953       | 681.356615     | 341.181945       | S    | 476.271489 | 238.639382      | 459.244940     | 230.126108       | 458.260924     | 229.634100       | 4  |
| 8  | 812.451244 | 406.729260      | 795.424695     | 398.215985       | 794.440679     | 397.723977       | L    | 389.239461 | 195.123369      | 372.212912     | 186.610094       | 371.228896     | 186.118086       | 3  |
| 9  | 941.493837 | 471.250557      | 924.467288     | 462.737282       | 923.483272     | 462.245274       | E    | 276.155397 | 138.581336      | 259.128848     | 130.068062       | 258.144832     | 129.576054       | 2  |
| 10 |            |                 |                |                  |                |                  | K    | 147.112804 | 74.060040       | 130.086255     | 65.546765        |                |                  | 1  |

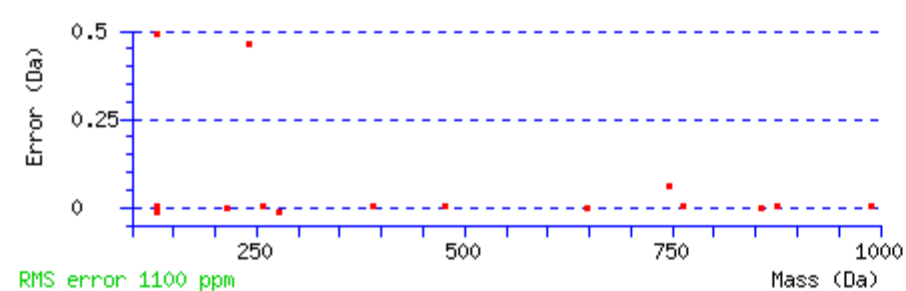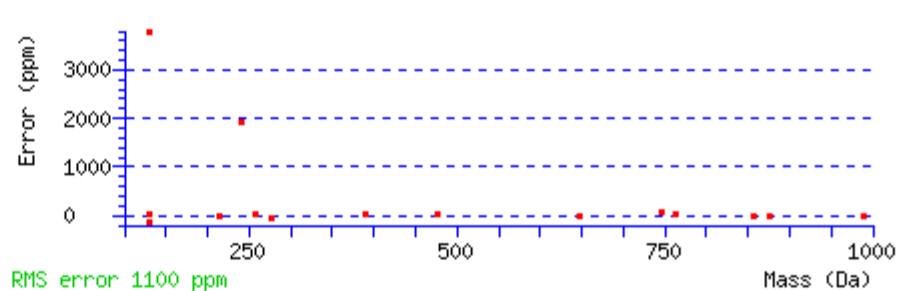

NCBI BLAST search of **VILDGNSLEK**

(Parameters: blastp, nr protein database, expect=20000, no filter, PAM30)

Other BLAST [web gateways](#)

**All matches to this query**

| Score | Mr(calc):   | Delta     | Sequence                   |
|-------|-------------|-----------|----------------------------|
| 39.0  | 1086.592072 | -0.003604 | <a href="#">VILDGNSLEK</a> |
| 9.6   | 1086.596771 | -0.008303 | <a href="#">VLRICEQR</a>   |
| 7.7   | 1086.585556 | 0.002912  | <a href="#">LGADVCAVLR</a> |
| 6.2   | 1086.592056 | -0.003588 | <a href="#">KEVINEVEK</a>  |
| 4.3   | 1086.592087 | -0.003619 | <a href="#">IQDLLVDSGK</a> |
| 4.3   | 1086.592056 | -0.003588 | <a href="#">AVKAPESLEK</a> |
| 3.1   | 1086.592072 | -0.003604 | <a href="#">LQQTLEEVK</a>  |
| 2.2   | 1086.592072 | -0.003604 | <a href="#">KLLDGPSTEK</a> |
| 0.8   | 1086.596100 | -0.007632 | <a href="#">EPLFLDLPK</a>  |
| 0.2   | 1086.589600 | -0.001132 | <a href="#">LVPMTVFK</a>   |

# MASCOT SEARCH RESULTS

## Peptide View

### MS/MS Fragmentation of AVGLLTVISK

Found in **PSCA\_HUMAN**, Prostate stem cell antigen OS=Homo sapiens GN=PSCA PE=1 SV=1

Match to Query 15325: 999.634068 from(500.824310,2+) rtinseconds(2866) index(38758)

Title: Locus:1.1.1.2520.12

Data file 2011-11-13 - TFD - EP 7-4.mgf

Click mouse within plot area to zoom in by factor of two about that point

Or, Plot from  to  Da

Label all possible matches  Label matches used for scoring

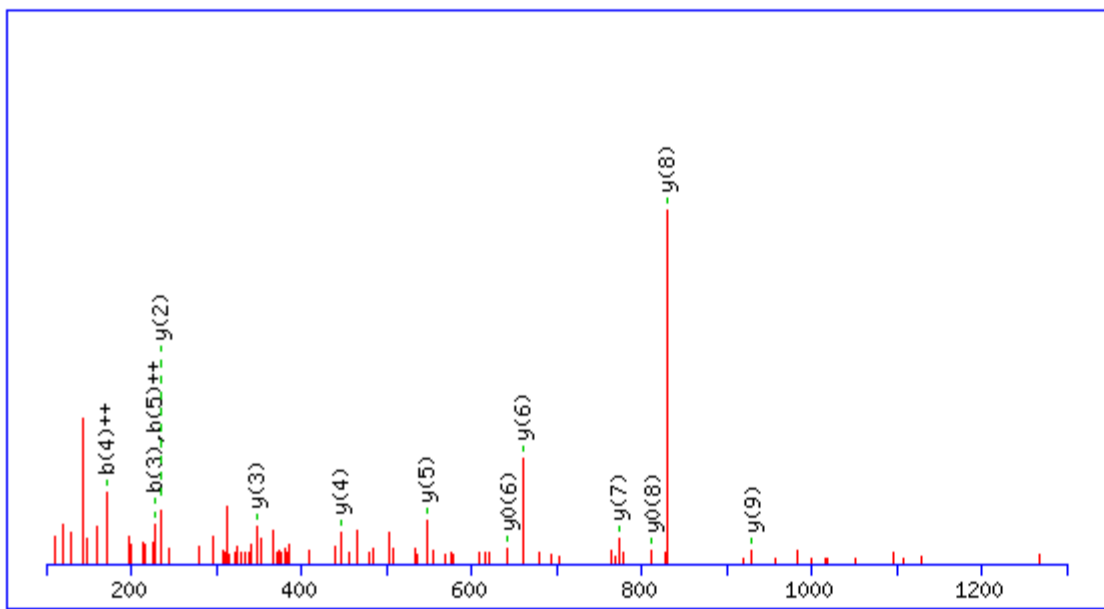

Monoisotopic mass of neutral peptide Mr(calc): 999.632828

Fixed modifications: Propionamide (C) (apply to specified residues or termini only)

Ions Score: 71 Expect: 9.8e-008

Matches : 14/78 fragment ions using 18 most intense peaks ([help](#))

| #  | b          | b <sup>++</sup> | b <sup>0</sup> | b <sup>0++</sup> | Seq. | y          | y <sup>++</sup> | y <sup>*</sup> | y <sup>**++</sup> | y <sup>0</sup> | y <sup>0++</sup> | #  |
|----|------------|-----------------|----------------|------------------|------|------------|-----------------|----------------|-------------------|----------------|------------------|----|
| 1  | 72.044390  | 36.525833       |                |                  | A    |            |                 |                |                   |                |                  | 10 |
| 2  | 171.112804 | 86.060040       |                |                  | V    | 929.602995 | 465.305136      | 912.576446     | 456.791861        | 911.592430     | 456.299853       | 9  |
| 3  | 228.134268 | 114.570772      |                |                  | G    | 830.534581 | 415.770929      | 813.508032     | 407.257654        | 812.524016     | 406.765646       | 8  |
| 4  | 341.218332 | 171.112804      |                |                  | L    | 773.513117 | 387.260197      | 756.486568     | 378.746922        | 755.502552     | 378.254914       | 7  |
| 5  | 454.302396 | 227.654836      |                |                  | L    | 660.429053 | 330.718165      | 643.402504     | 322.204890        | 642.418488     | 321.712882       | 6  |
| 6  | 555.350075 | 278.178676      | 537.339510     | 269.173393       | T    | 547.344989 | 274.176133      | 530.318440     | 265.662858        | 529.334424     | 265.170850       | 5  |
| 7  | 654.418489 | 327.712883      | 636.407924     | 318.707600       | V    | 446.297310 | 223.652293      | 429.270761     | 215.139018        | 428.286745     | 214.647010       | 4  |
| 8  | 767.502553 | 384.254915      | 749.491988     | 375.249632       | I    | 347.228896 | 174.118086      | 330.202347     | 165.604811        | 329.218331     | 165.112803       | 3  |
| 9  | 854.534581 | 427.770929      | 836.524016     | 418.765646       | S    | 234.144832 | 117.576054      | 217.118283     | 109.062779        | 216.134267     | 108.570771       | 2  |
| 10 |            |                 |                |                  | K    | 147.112804 | 74.060040       | 130.086255     | 65.546765         |                |                  | 1  |

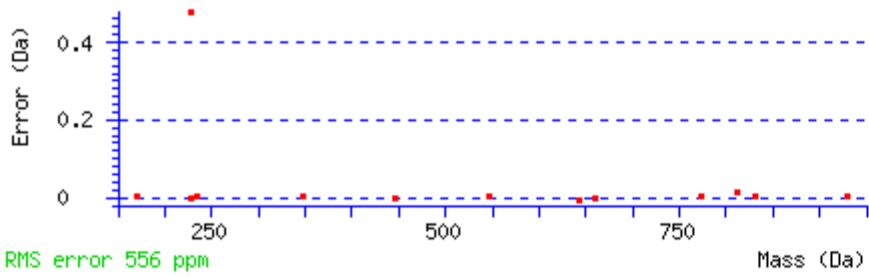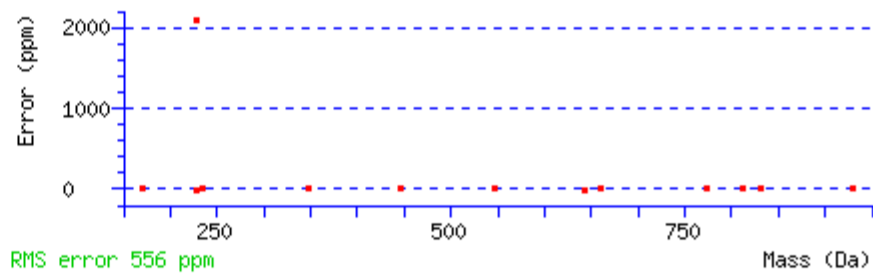

### NCBI BLAST search of AVGLLTVISK

(Parameters: blastp, nr protein database, expect=20000, no filter, PAM30)

Other BLAST [web gateways](#)

### All matches to this query

| Score | Mr(calc):  | Delta     | Sequence                   |
|-------|------------|-----------|----------------------------|
| 71.0  | 999.632828 | 0.001240  | <a href="#">AVGLLTVISK</a> |
| 5.1   | 999.644028 | -0.009960 | <a href="#">RLAISSLK</a>   |

# **MASCOT** Mascot Search Results

## Peptide View

MS/MS Fragmentation of **LSTSSYSQVR**

Found in **PSME4\_HUMAN**, Proteasome activator complex subunit 4 OS=Homo sapiens GN=PSME4 PE=1 SV=2

Match to Query 24932: 1126.572308 from(564.293430,2+) rtinseconds(1443) index(11433)

Title: Locus:1.1.1.1902.38

Data file 2011-11-10 - TFD - EP 4-1.mgf

Click mouse within plot area to zoom in by factor of two about that point

Or, Plot from  to  Da

Label all possible matches  Label matches used for scoring

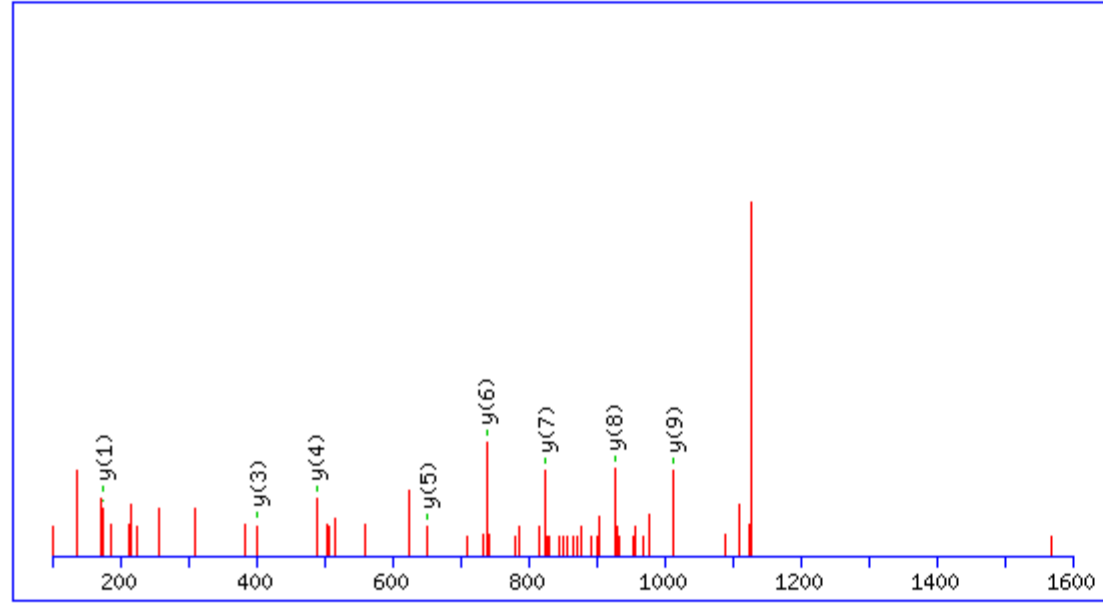

Monoisotopic mass of neutral peptide Mr(calc): 1126.561844

Fixed modifications: Propionamide (C) (apply to specified residues or termini only)

Ions Score: 39 Expect: 0.00095

Matches : 8/86 fragment ions using 28 most intense peaks [\(help\)](#)

| #  | b          | b <sup>++</sup> | b*         | b <sup>+++</sup> | b <sup>0</sup> | b <sup>0++</sup> | Seq. | y                  | y <sup>++</sup> | y*         | y <sup>+++</sup> | y <sup>0</sup> | y <sup>0++</sup> | #  |
|----|------------|-----------------|------------|------------------|----------------|------------------|------|--------------------|-----------------|------------|------------------|----------------|------------------|----|
| 1  | 114.091340 | 57.549308       |            |                  |                |                  | L    |                    |                 |            |                  |                |                  | 10 |
| 2  | 201.123368 | 101.065322      |            |                  | 183.112803     | 92.060039        | S    | <i>1014.485064</i> | 507.746170      | 997.458515 | 499.232896       | 996.474499     | 498.740888       | 9  |
| 3  | 302.171047 | 151.589161      |            |                  | 284.160482     | 142.583879       | T    | <i>927.453036</i>  | 464.230156      | 910.426487 | 455.716882       | 909.442471     | 455.224874       | 8  |
| 4  | 389.203075 | 195.105175      |            |                  | 371.192510     | 186.099893       | S    | <i>826.405357</i>  | 413.706317      | 809.378808 | 405.193042       | 808.394792     | 404.701034       | 7  |
| 5  | 476.235103 | 238.621189      |            |                  | 458.224538     | 229.615907       | S    | <i>739.373329</i>  | 370.190303      | 722.346780 | 361.677028       | 721.362764     | 361.185020       | 6  |
| 6  | 639.298432 | 320.152854      |            |                  | 621.287867     | 311.147572       | Y    | <i>652.341301</i>  | 326.674289      | 635.314752 | 318.161014       | 634.330736     | 317.669006       | 5  |
| 7  | 726.330460 | 363.668868      |            |                  | 708.319895     | 354.663586       | S    | <i>489.277972</i>  | 245.142624      | 472.251423 | 236.629349       | 471.267407     | 236.137341       | 4  |
| 8  | 854.389038 | 427.698157      | 837.362489 | 419.184883       | 836.378473     | 418.692875       | Q    | <i>402.245944</i>  | 201.626610      | 385.219395 | 193.113336       |                |                  | 3  |
| 9  | 953.457452 | 477.232364      | 936.430903 | 468.719090       | 935.446887     | 468.227082       | V    | 274.187366         | 137.597321      | 257.160817 | 129.084047       |                |                  | 2  |
| 10 |            |                 |            |                  |                |                  | R    | <i>175.118952</i>  | 88.063114       | 158.092403 | 79.549840        |                |                  | 1  |

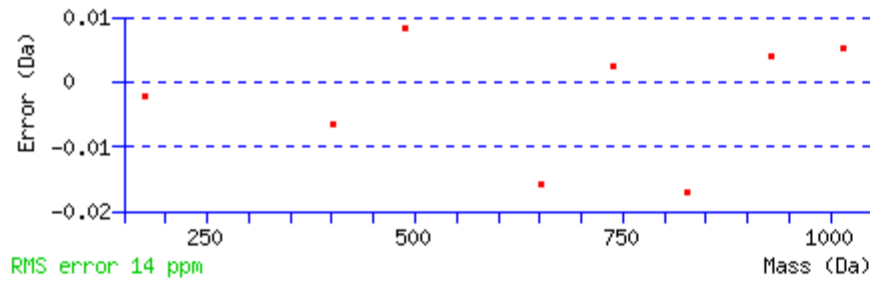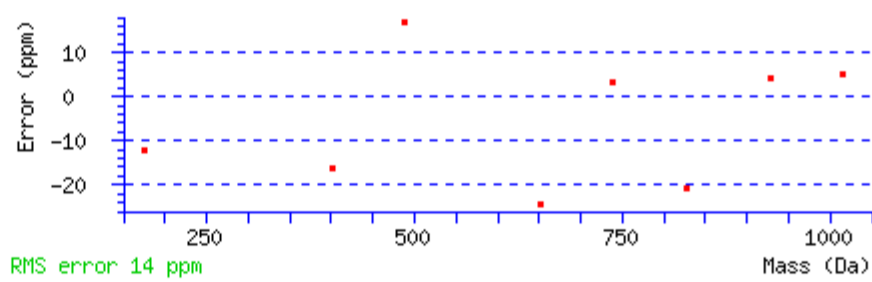

NCBI BLAST search of **LSTSSYSQVR**

(Parameters: blastp, nr protein database, expect=20000, no filter, PAM30)

Other BLAST [web gateways](#)

## All matches to this query

| Score | Mr(calc):   | Delta    | Sequence                   |
|-------|-------------|----------|----------------------------|
| 39.3  | 1126.561844 | 0.010464 | <a href="#">LSTSSYSQVR</a> |
| 6.6   | 1126.561874 | 0.010434 | <a href="#">TSPPTPVQR</a>  |
| 6.6   | 1126.561874 | 0.010434 | <a href="#">TSPPTPVQR</a>  |

**Peptide View**

MS/MS Fragmentation of **TEALSVIELLLK**

Found in **ECM29\_HUMAN**, Proteasome-associated protein ECM29 homolog OS=Homo sapiens GN=ECM29 PE=1 SV=2

Match to Query 37564: 1327.801068 from(664.907810,2+) rtinseconds(4534) index(68465)

Title: Locus:1.1.1.3018.22

Data file 2011-11-12 - TFD - EP 6-1.mgf

Click mouse within plot area to zoom in by factor of two about that point

Or, Plot from  to  Da

Label all possible matches  Label matches used for scoring

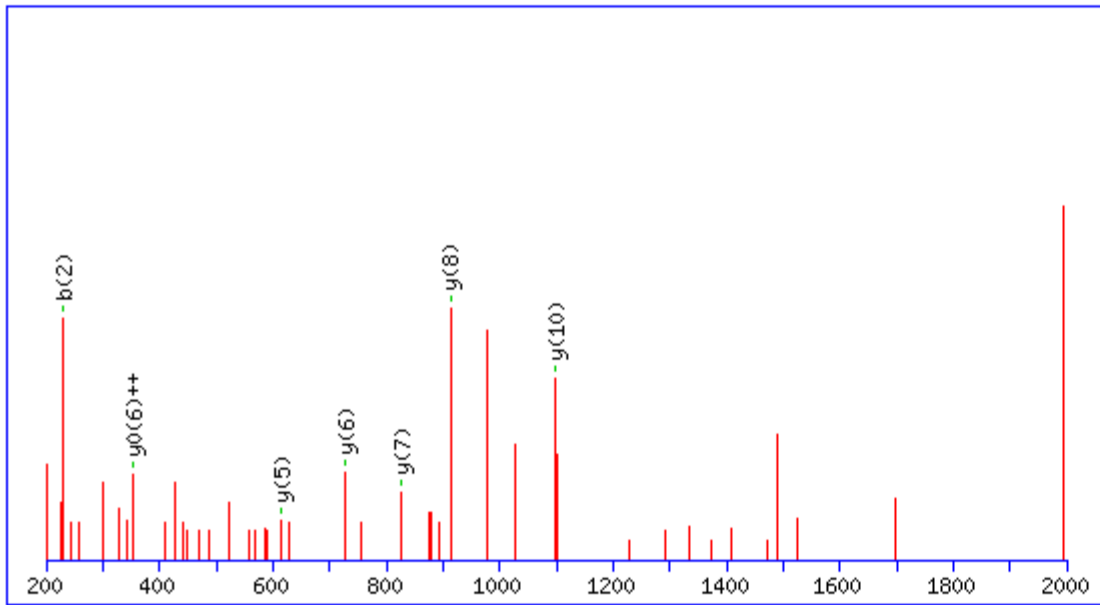

Monoisotopic mass of neutral peptide  $M_r(\text{calc})$ : 1327.796234

Fixed modifications: Propionamide (C) (apply to specified residues or termini only)

Ions Score: 31 Expect: 0.00076

Matches : 7/102 fragment ions using 10 most intense peaks ([help](#))

| #  | b                 | b <sup>++</sup> | b <sup>0</sup> | b <sup>0++</sup> | Seq. | y                  | y <sup>++</sup> | y <sup>*</sup> | y <sup>*++</sup> | y <sup>0</sup> | y <sup>0++</sup>  | #  |
|----|-------------------|-----------------|----------------|------------------|------|--------------------|-----------------|----------------|------------------|----------------|-------------------|----|
| 1  | 102.054955        | 51.531116       | 84.044390      | 42.525833        | T    |                    |                 |                |                  |                |                   | 12 |
| 2  | <b>231.097548</b> | 116.052412      | 213.086983     | 107.047130       | E    | 1227.755866        | 614.381571      | 1210.729317    | 605.868297       | 1209.745301    | 605.376288        | 11 |
| 3  | 302.134662        | 151.570969      | 284.124097     | 142.565687       | A    | <b>1098.713273</b> | 549.860275      | 1081.686724    | 541.347000       | 1080.702708    | 540.854992        | 10 |
| 4  | 415.218726        | 208.113001      | 397.208161     | 199.107719       | L    | 1027.676159        | 514.341718      | 1010.649610    | 505.828443       | 1009.665594    | 505.336435        | 9  |
| 5  | 502.250754        | 251.629015      | 484.240189     | 242.623732       | S    | <b>914.592095</b>  | 457.799686      | 897.565546     | 449.286411       | 896.581530     | 448.794403        | 8  |
| 6  | 601.319168        | 301.163222      | 583.308603     | 292.157940       | V    | <b>827.560067</b>  | 414.283672      | 810.533518     | 405.770397       | 809.549502     | 405.278389        | 7  |
| 7  | 714.403232        | 357.705254      | 696.392667     | 348.699972       | I    | <b>728.491653</b>  | 364.749465      | 711.465104     | 356.236190       | 710.481088     | <b>355.744182</b> | 6  |
| 8  | 843.445825        | 422.226551      | 825.435260     | 413.221268       | E    | <b>615.407589</b>  | 308.207433      | 598.381040     | 299.694158       | 597.397024     | 299.202150        | 5  |
| 9  | 956.529889        | 478.768583      | 938.519324     | 469.763300       | L    | 486.364996         | 243.686136      | 469.338447     | 235.172861       |                |                   | 4  |
| 10 | 1069.613953       | 535.310615      | 1051.603388    | 526.305332       | L    | 373.280932         | 187.144104      | 356.254383     | 178.630829       |                |                   | 3  |
| 11 | 1182.698017       | 591.852646      | 1164.687452    | 582.847364       | L    | 260.196868         | 130.602072      | 243.170319     | 122.088797       |                |                   | 2  |
| 12 |                   |                 |                |                  | K    | 147.112804         | 74.060040       | 130.086255     | 65.546765        |                |                   | 1  |

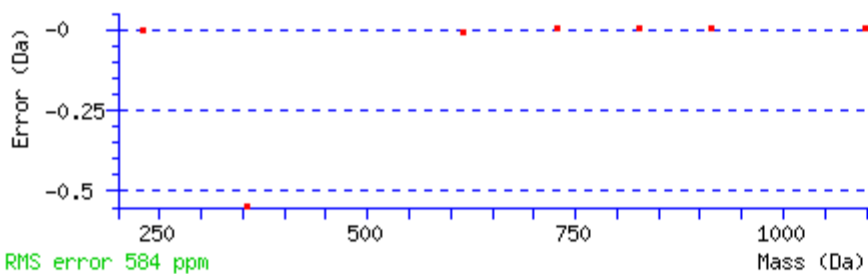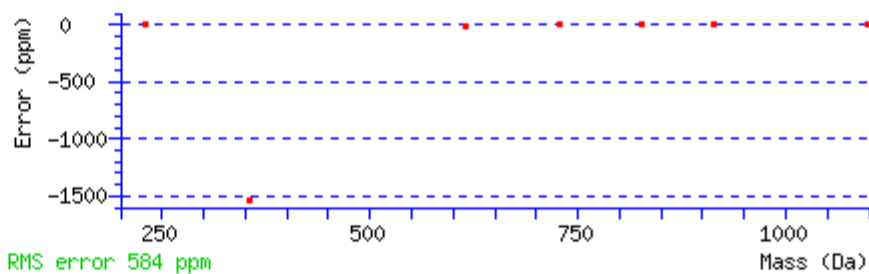

NCBI BLAST search of [TEALSVIELLLK](#)

(Parameters: blastp, nr protein database, expect=20000, no filter, PAM30)

Other BLAST [web gateways](#)

**All matches to this query**

| Score | $M_r(\text{calc})$ : | Delta    | Sequence                     |
|-------|----------------------|----------|------------------------------|
| 31.2  | 1327.796234          | 0.004834 | <a href="#">TEALSVIELLLK</a> |



# MASCOT Search Results

## Peptide View

MS/MS Fragmentation of **HTYLPLEVCNIVAGQR**  
 Found in **AGO1\_HUMAN**, Protein argonaute-1 OS=Homo sapiens GN=EIF2C1 PE=1 SV=3

Match to Query 57640: 1882.962522 from(628.661450,3+) rtinseconds(3163) index(42893)  
 Title: Locus:1.1.1.2655.32  
 Data file 2011-11-14 - TFD - EP 7-2.mgf

Click mouse within plot area to zoom in by factor of two about that point

Or,  Plot from  to  Da

Label all possible matches  Label matches used for scoring

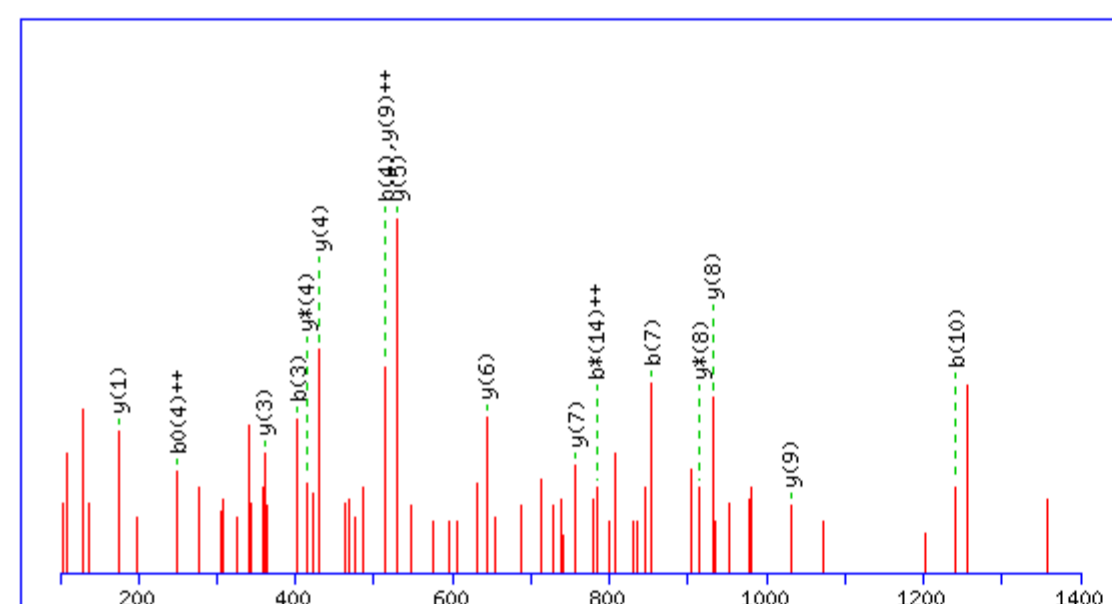

Monoisotopic mass of neutral peptide Mr(calc): 1882.972336  
 Fixed modifications: Propionamide (C) (apply to specified residues or termini only)  
 Ions Score: 40 Expect: 0.00071  
 Matches: 17/142 fragment ions using 32 most intense peaks [\(help\)](#)

| #  | b                  | b <sup>++</sup> | b <sup>*</sup> | b <sup>+++</sup>  | b <sup>0</sup> | b <sup>0++</sup>  | Seq. | y                  | y <sup>++</sup>   | y <sup>*</sup>    | y <sup>+++</sup> | y <sup>0</sup> | y <sup>0++</sup> | #  |
|----|--------------------|-----------------|----------------|-------------------|----------------|-------------------|------|--------------------|-------------------|-------------------|------------------|----------------|------------------|----|
| 1  | 138.066188         | 69.536732       |                |                   |                |                   | H    |                    |                   |                   |                  |                |                  | 16 |
| 2  | 239.113867         | 120.060571      |                |                   | 221.103302     | 111.055289        | T    | 1746.920719        | 873.963998        | 1729.894170       | 865.450723       | 1728.910154    | 864.958715       | 15 |
| 3  | <b>402.177196</b>  | 201.592236      |                |                   | 384.166631     | 192.586953        | Y    | 1645.873040        | 823.440158        | 1628.846491       | 814.926884       | 1627.862475    | 814.434875       | 14 |
| 4  | <b>515.261260</b>  | 258.134268      |                |                   | 497.250695     | <b>249.128986</b> | L    | 1482.809711        | 741.908493        | 1465.783162       | 733.395219       | 1464.799146    | 732.903211       | 13 |
| 5  | 612.314024         | 306.660650      |                |                   | 594.303459     | 297.655368        | P    | 1369.725647        | 685.366462        | 1352.699098       | 676.853187       | 1351.715082    | 676.361179       | 12 |
| 6  | 725.398088         | 363.202682      |                |                   | 707.387523     | 354.197400        | L    | 1272.672883        | 636.840080        | 1255.646334       | 628.326805       | 1254.662318    | 627.834797       | 11 |
| 7  | <b>854.440681</b>  | 427.723979      |                |                   | 836.430116     | 418.718696        | E    | 1159.588819        | 580.298047        | 1142.562270       | 571.784773       | 1141.578254    | 571.292765       | 10 |
| 8  | 953.509095         | 477.258186      |                |                   | 935.498530     | 468.252903        | V    | <b>1030.546226</b> | <b>515.776751</b> | 1013.519677       | 507.263476       |                |                  | 9  |
| 9  | 1127.555394        | 564.281335      |                |                   | 1109.544829    | 555.276052        | C    | <b>931.477812</b>  | 466.242544        | <b>914.451263</b> | 457.729269       |                |                  | 8  |
| 10 | <b>1241.598321</b> | 621.302798      | 1224.571772    | 612.789524        | 1223.587756    | 612.297516        | N    | <b>757.431513</b>  | 379.219395        | 740.404964        | 370.706120       |                |                  | 7  |
| 11 | 1354.682385        | 677.844830      | 1337.655836    | 669.331556        | 1336.671820    | 668.839548        | I    | <b>643.388586</b>  | 322.197931        | 626.362037        | 313.684657       |                |                  | 6  |
| 12 | 1453.750799        | 727.379037      | 1436.724250    | 718.865763        | 1435.740234    | 718.373755        | V    | <b>530.304522</b>  | 265.655899        | 513.277973        | 257.142625       |                |                  | 5  |
| 13 | 1524.787913        | 762.897594      | 1507.761364    | 754.384320        | 1506.777348    | 753.892312        | A    | <b>431.236108</b>  | 216.121692        | <b>414.209559</b> | 207.608417       |                |                  | 4  |
| 14 | 1581.809377        | 791.408326      | 1564.782828    | <b>782.895052</b> | 1563.798812    | 782.403044        | G    | <b>360.198994</b>  | 180.603135        | 343.172445        | 172.089860       |                |                  | 3  |
| 15 | 1709.867955        | 855.437615      | 1692.841406    | 846.924341        | 1691.857390    | 846.432333        | Q    | 303.177530         | 152.092403        | 286.150981        | 143.579129       |                |                  | 2  |
| 16 |                    |                 |                |                   |                |                   | R    | <b>175.118952</b>  | 88.063114         | 158.092403        | 79.549839        |                |                  | 1  |

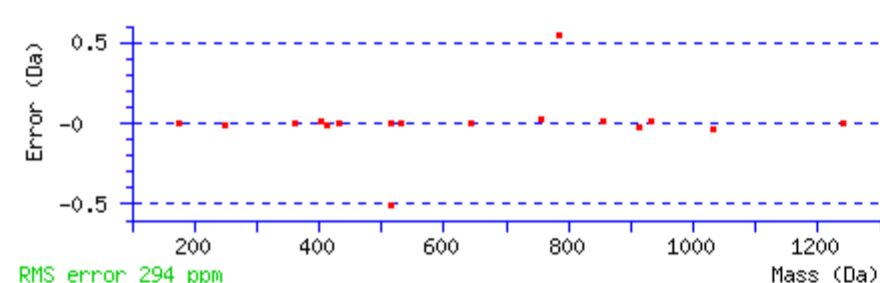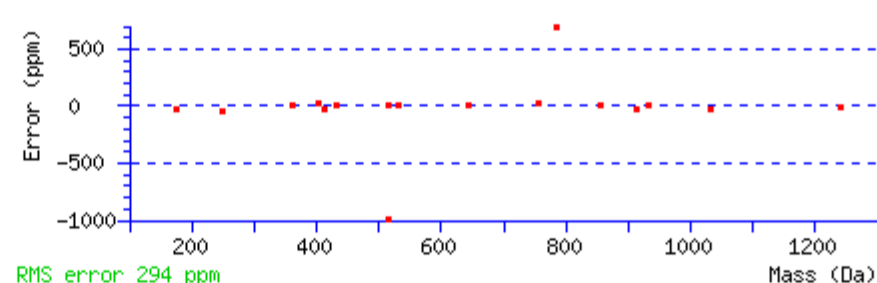

NCBI BLAST search of [HTYLPLEVCNIVAGQR](#)  
 (Parameters: blastp, nr protein database, expect=20000, no filter, PAM30)  
 Other BLAST [web gateways](#)

## All matches to this query

| Score | Mr(calc):   | Delta     | Sequence                            |
|-------|-------------|-----------|-------------------------------------|
| 40.0  | 1882.972336 | -0.009814 | <a href="#">HTYLPLEVCNIVAGQR</a>    |
| 6.0   | 1882.957047 | 0.005475  | <a href="#">AEA EKVSAMLDHNSLIR</a>  |
| 3.6   | 1882.963608 | -0.001086 | <a href="#">ELPSLS PAPTGLSPSKR</a>  |
| 1.2   | 1882.979553 | -0.017031 | <a href="#">MAGVRPDNVAE VVAGARR</a> |
| 0.3   | 1882.979553 | -0.017031 | <a href="#">MAGVRPDNVAE VVAGARR</a> |

Mascot: <http://www.matrixscience.com/>

**MATRIX SCIENCE Mascot Search Results**

**Peptide View**

MS/MS Fragmentation of **SVSIPAPAYY AHLVAFR**

Found in **AGO2\_HUMAN**, Protein argonaute-2 OS=Homo sapiens GN=EIF2C2 PE=1 SV=3

Match to Query 59957: 1860.985332 from(621.335720,3+) rtinseconds(3489) index(50202)

Title: Locus:1.1.1.2760.15

Data file 2011-11-10 - TFD - EP 3-2.mgf

Click mouse within plot area to zoom in by factor of two about that point

Or, Plot from  to  Da

Label all possible matches  Label matches used for scoring

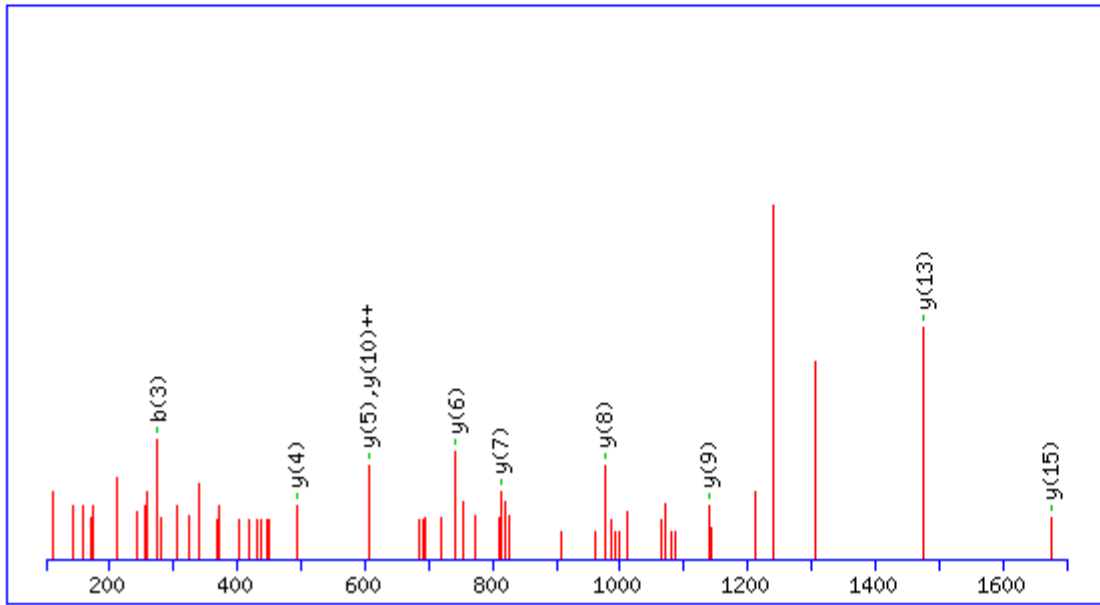

Monoisotopic mass of neutral peptide Mr(calc): 1860.988632

Fixed modifications: Propionamide (C) (apply to specified residues or termini only)

Ions Score: 51 Expect: 7.1e-005

Matches : 10/132 fragment ions using 14 most intense peaks [\(help\)](#)

| #  | b                 | b <sup>++</sup> | b <sup>0</sup> | b <sup>0++</sup> | Seq. | y                  | y <sup>++</sup>   | y <sup>*</sup> | y <sup>+++</sup> | y <sup>0</sup> | y <sup>0++</sup> | #  |
|----|-------------------|-----------------|----------------|------------------|------|--------------------|-------------------|----------------|------------------|----------------|------------------|----|
| 1  | 88.039304         | 44.523290       | 70.028739      | 35.518008        | S    |                    |                   |                |                  |                |                  | 17 |
| 2  | 187.107718        | 94.057497       | 169.097153     | 85.052214        | V    | 1774.963904        | 887.985590        | 1757.937355    | 879.472316       | 1756.953339    | 878.980307       | 16 |
| 3  | <b>274.139746</b> | 137.573511      | 256.129181     | 128.568229       | S    | <b>1675.895490</b> | 838.451383        | 1658.868941    | 829.938109       | 1657.884925    | 829.446101       | 15 |
| 4  | 387.223810        | 194.115543      | 369.213245     | 185.110261       | I    | 1588.863462        | 794.935369        | 1571.836913    | 786.422095       |                |                  | 14 |
| 5  | 484.276574        | 242.641925      | 466.266009     | 233.636643       | P    | <b>1475.779398</b> | 738.393337        | 1458.752849    | 729.880063       |                |                  | 13 |
| 6  | 555.313688        | 278.160482      | 537.303123     | 269.155200       | A    | 1378.726634        | 689.866955        | 1361.700085    | 681.353681       |                |                  | 12 |
| 7  | 652.366452        | 326.686864      | 634.355887     | 317.681582       | P    | 1307.689520        | 654.348398        | 1290.662971    | 645.835124       |                |                  | 11 |
| 8  | 723.403566        | 362.205421      | 705.393001     | 353.200139       | A    | 1210.636756        | <b>605.822016</b> | 1193.610207    | 597.308742       |                |                  | 10 |
| 9  | 886.466895        | 443.737086      | 868.456330     | 434.731803       | Y    | <b>1139.599642</b> | 570.303459        | 1122.573093    | 561.790185       |                |                  | 9  |
| 10 | 1049.530224       | 525.268750      | 1031.519659    | 516.263468       | Y    | <b>976.536313</b>  | 488.771795        | 959.509764     | 480.258520       |                |                  | 8  |
| 11 | 1120.567338       | 560.787307      | 1102.556773    | 551.782025       | A    | <b>813.472984</b>  | 407.240130        | 796.446435     | 398.726856       |                |                  | 7  |
| 12 | 1257.626250       | 629.316763      | 1239.615685    | 620.311481       | H    | <b>742.435870</b>  | 371.721573        | 725.409321     | 363.208299       |                |                  | 6  |
| 13 | 1370.710314       | 685.858795      | 1352.699749    | 676.853512       | L    | <b>605.376958</b>  | 303.192117        | 588.350409     | 294.678843       |                |                  | 5  |
| 14 | 1469.778728       | 735.393002      | 1451.768163    | 726.387720       | V    | <b>492.292894</b>  | 246.650085        | 475.266345     | 238.136811       |                |                  | 4  |
| 15 | 1540.815842       | 770.911559      | 1522.805277    | 761.906276       | A    | 393.224480         | 197.115878        | 376.197931     | 188.602603       |                |                  | 3  |
| 16 | 1687.884256       | 844.445766      | 1669.873691    | 835.440484       | F    | 322.187366         | 161.597321        | 305.160817     | 153.084047       |                |                  | 2  |
| 17 |                   |                 |                |                  | R    | 175.118952         | 88.063114         | 158.092403     | 79.549839        |                |                  | 1  |

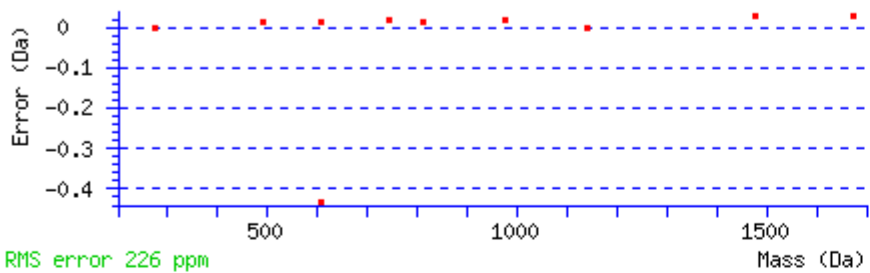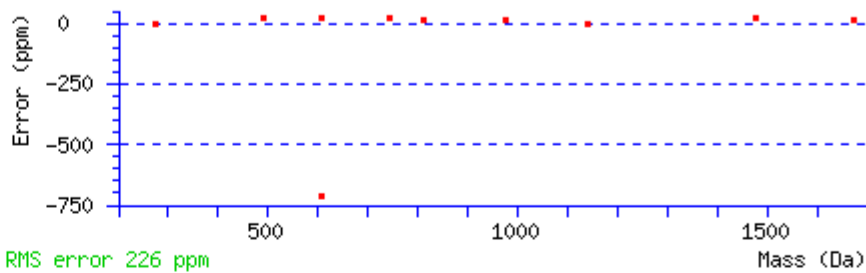

NCBI BLAST search of [SVSIPAPAYY AHLVAFR](#)

(Parameters: blastp, nr protein database, expect=20000, no filter, PAM30)

Other BLAST [web gateways](#)

**All matches to this query**

| Score | Mr(calc):   | Delta     | Sequence                           |
|-------|-------------|-----------|------------------------------------|
| 50.8  | 1860.988632 | -0.003300 | <a href="#">SVSIPAPAYY AHLVAFR</a> |

# MASCOT Search Results

## Peptide View

MS/MS Fragmentation of **SYEAQDPEIASLSGK**

Found in **C10\_HUMAN**, Protein C10 OS=Homo sapiens GN=C12orf57 PE=1 SV=1

Match to Query 42202: 1593.759268 from(797.886910,2+) rtinseconds(2244) index(21700)

Title: Locus:1.1.1.2185.28

Data file 2011-11-12 - TFD - EP 6-7.mgf

Click mouse within plot area to zoom in by factor of two about that point

Or, Plot from  to  Da

Label all possible matches  Label matches used for scoring

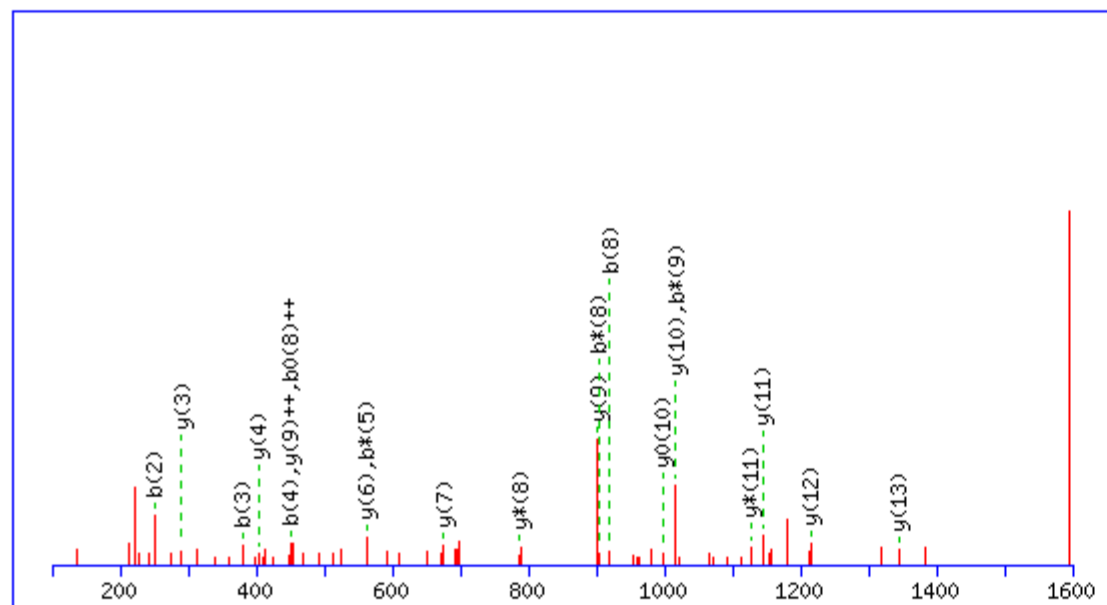

Monoisotopic mass of neutral peptide  $M_r(\text{calc})$ : 1593.752197

Fixed modifications: Propionamide (C) (apply to specified residues or termini only)

Ions Score: 53 Expect: 6.6e-005

Matches : 21/156 fragment ions using 36 most intense peaks ([help](#))

| #  | b                 | b <sup>++</sup> | b <sup>*</sup>     | b <sup>*++</sup> | b <sup>0</sup> | b <sup>0++</sup>  | Seq. | y                  | y <sup>++</sup>   | y <sup>*</sup>     | y <sup>*++</sup> | y <sup>0</sup>    | y <sup>0++</sup> | #  |
|----|-------------------|-----------------|--------------------|------------------|----------------|-------------------|------|--------------------|-------------------|--------------------|------------------|-------------------|------------------|----|
| 1  | 88.039304         | 44.523290       |                    |                  | 70.028739      | 35.518008         | S    |                    |                   |                    |                  |                   |                  | 15 |
| 2  | <b>251.102633</b> | 126.054954      |                    |                  | 233.092068     | 117.049672        | Y    | 1507.727480        | 754.367378        | 1490.700931        | 745.854104       | 1489.716915       | 745.362096       | 14 |
| 3  | <b>380.145226</b> | 190.576251      |                    |                  | 362.134661     | 181.570969        | E    | <b>1344.664151</b> | 672.835714        | 1327.637602        | 664.322439       | 1326.653586       | 663.830431       | 13 |
| 4  | <b>451.182340</b> | 226.094808      |                    |                  | 433.171775     | 217.089526        | A    | <b>1215.621558</b> | 608.314417        | 1198.595009        | 599.801143       | 1197.610993       | 599.309135       | 12 |
| 5  | 579.240918        | 290.124097      | <b>562.214369</b>  | 281.610823       | 561.230353     | 281.118815        | Q    | <b>1144.584444</b> | 572.795860        | <b>1127.557895</b> | 564.282586       | 1126.573879       | 563.790578       | 11 |
| 6  | 694.267861        | 347.637569      | 677.241312         | 339.124294       | 676.257296     | 338.632286        | D    | <b>1016.525866</b> | 508.766571        | 999.499317         | 500.253297       | <b>998.515301</b> | 499.761289       | 10 |
| 7  | 791.320625        | 396.163951      | 774.294076         | 387.650676       | 773.310060     | 387.158668        | P    | <b>901.498923</b>  | <b>451.253100</b> | 884.472374         | 442.739825       | 883.488358        | 442.247817       | 9  |
| 8  | <b>920.363218</b> | 460.685247      | <b>903.336669</b>  | 452.171973       | 902.352653     | <b>451.679965</b> | E    | 804.446159         | 402.726718        | <b>787.419610</b>  | 394.213443       | 786.435594        | 393.721435       | 8  |
| 9  | 1033.447282       | 517.227279      | <b>1016.420733</b> | 508.714005       | 1015.436717    | 508.221997        | I    | <b>675.403566</b>  | 338.205421        | 658.377017         | 329.692147       | 657.393001        | 329.200139       | 7  |
| 10 | 1104.484396       | 552.745836      | 1087.457847        | 544.232562       | 1086.473831    | 543.740554        | A    | <b>562.319502</b>  | 281.663389        | 545.292953         | 273.150115       | 544.308937        | 272.658107       | 6  |
| 11 | 1191.516424       | 596.261850      | 1174.489875        | 587.748576       | 1173.505859    | 587.256568        | S    | 491.282388         | 246.144832        | 474.255839         | 237.631557       | 473.271823        | 237.139549       | 5  |
| 12 | 1304.600488       | 652.803882      | 1287.573939        | 644.290608       | 1286.589923    | 643.798600        | L    | <b>404.250360</b>  | 202.628818        | 387.223811         | 194.115543       | 386.239795        | 193.623535       | 4  |
| 13 | 1391.632516       | 696.319896      | 1374.605967        | 687.806622       | 1373.621951    | 687.314614        | S    | <b>291.166296</b>  | 146.086786        | 274.139747         | 137.573512       | 273.155731        | 137.081504       | 3  |
| 14 | 1448.653980       | 724.830628      | 1431.627431        | 716.317354       | 1430.643415    | 715.825346        | G    | 204.134268         | 102.570772        | 187.107719         | 94.057497        |                   |                  | 2  |
| 15 |                   |                 |                    |                  |                |                   | K    | 147.112804         | 74.060040         | 130.086255         | 65.546765        |                   |                  | 1  |

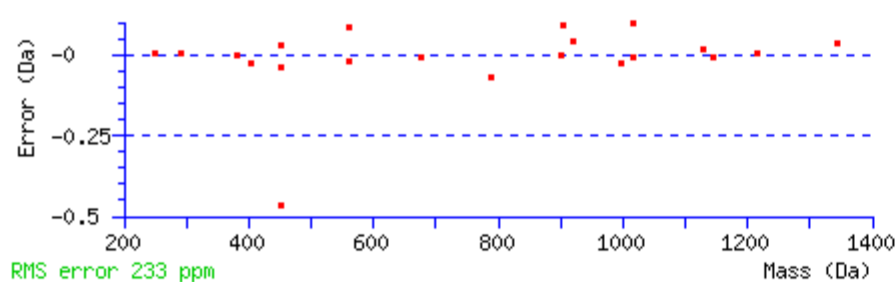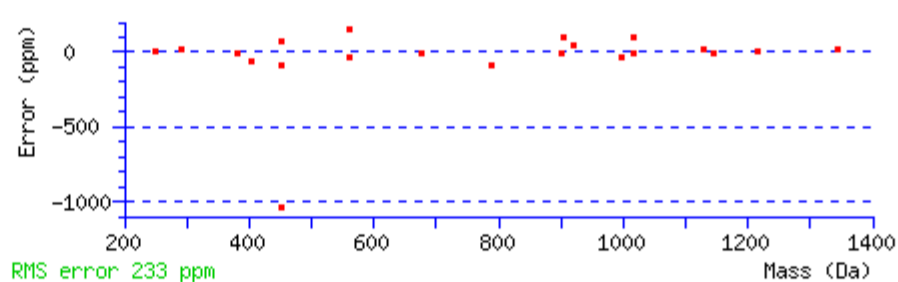

NCBI BLAST search of [SYEAQDPEIASLSGK](#)

(Parameters: blastp, nr protein database, expect=20000, no filter, PAM30)

Other BLAST [web gateways](#)

All matches to this query

| Score | $M_r(\text{calc})$ : | Delta    | Sequence                        |
|-------|----------------------|----------|---------------------------------|
| 52.6  | 1593.752197          | 0.007071 | <a href="#">SYEAQDPEIASLSGK</a> |

Mascot: <http://www.matrixscience.com/>

# Mascot Search Results

## Peptide View

MS/MS Fragmentation of **EQYPGIEISR**  
Found in **CQ037\_HUMAN**, Protein C17orf37 OS=Homo sapiens GN=C17orf37 PE=1 SV=1

Match to Query 33520: 1319.636768 from(660.825660,2+) rtinseconds(2235) index(19537)  
Title: Locus:1.1.1.2307.36  
Data file 2011-11-10 - TFD - EP 4-7.mgf

Click mouse within plot area to zoom in by factor of two about that point  
Or, Plot from  to  Da   
Label all possible matches  Label matches used for scoring

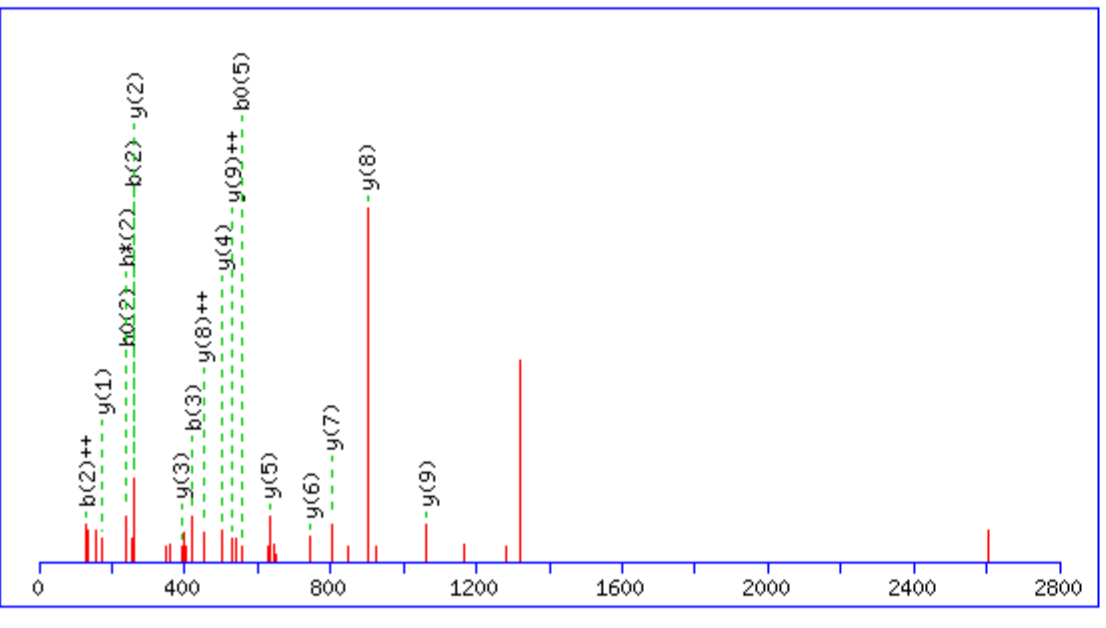

**Monoisotopic mass of neutral peptide Mr(calc):** 1319.635712  
**Fixed modifications:** Propionamide (C) (apply to specified residues or termini only)  
**Ions Score:** 70 **Expect:** 1.2e-006  
**Matches:** 17/116 fragment ions using 29 most intense peaks ([help](#))

| #  | b                 | b <sup>++</sup>   | b <sup>*</sup>    | b <sup>*++</sup> | b <sup>0</sup>    | b <sup>0++</sup> | Seq. | y                  | y <sup>++</sup>   | y <sup>*</sup> | y <sup>*++</sup> | y <sup>0</sup> | y <sup>0++</sup> | #  |
|----|-------------------|-------------------|-------------------|------------------|-------------------|------------------|------|--------------------|-------------------|----------------|------------------|----------------|------------------|----|
| 1  | 130.049869        | 65.528572         |                   |                  | 112.039304        | 56.523290        | E    |                    |                   |                |                  |                |                  | 11 |
| 2  | <b>258.108447</b> | <b>129.557862</b> | <b>241.081898</b> | 121.044587       | <b>240.097882</b> | 120.552579       | Q    | 1191.600429        | 596.303853        | 1174.573880    | 587.790578       | 1173.589864    | 587.298570       | 10 |
| 3  | <b>421.171776</b> | 211.089526        | 404.145227        | 202.576252       | 403.161211        | 202.084244       | Y    | <b>1063.541851</b> | <b>532.274564</b> | 1046.515302    | 523.761289       | 1045.531286    | 523.269281       | 9  |
| 4  | 518.224540        | 259.615908        | 501.197991        | 251.102634       | 500.213975        | 250.610626       | P    | <b>900.478522</b>  | <b>450.742899</b> | 883.451973     | 442.229625       | 882.467957     | 441.737617       | 8  |
| 5  | 575.246004        | 288.126640        | 558.219455        | 279.613366       | <b>557.235439</b> | 279.121358       | G    | <b>803.425758</b>  | 402.216517        | 786.399209     | 393.703243       | 785.415193     | 393.211235       | 7  |
| 6  | 688.330068        | 344.668672        | 671.303519        | 336.155398       | 670.319503        | 335.663390       | I    | <b>746.404294</b>  | 373.705785        | 729.377745     | 365.192511       | 728.393729     | 364.700503       | 6  |
| 7  | 817.372661        | 409.189969        | 800.346112        | 400.676694       | 799.362096        | 400.184686       | E    | <b>633.320230</b>  | 317.163753        | 616.293681     | 308.650479       | 615.309665     | 308.158471       | 5  |
| 8  | 930.456725        | 465.732001        | 913.430176        | 457.218726       | 912.446160        | 456.726718       | I    | <b>504.277637</b>  | 252.642457        | 487.251088     | 244.129182       | 486.267072     | 243.637174       | 4  |
| 9  | 1059.499318       | 530.253297        | 1042.472769       | 521.740023       | 1041.488753       | 521.248015       | E    | <b>391.193573</b>  | 196.100425        | 374.167024     | 187.587150       | 373.183008     | 187.095142       | 3  |
| 10 | 1146.531346       | 573.769311        | 1129.504797       | 565.256037       | 1128.520781       | 564.764029       | S    | <b>262.150980</b>  | 131.579128        | 245.124431     | 123.065854       | 244.140415     | 122.573846       | 2  |
| 11 |                   |                   |                   |                  |                   |                  | R    | <b>175.118952</b>  | 88.063114         | 158.092403     | 79.549839        |                |                  | 1  |

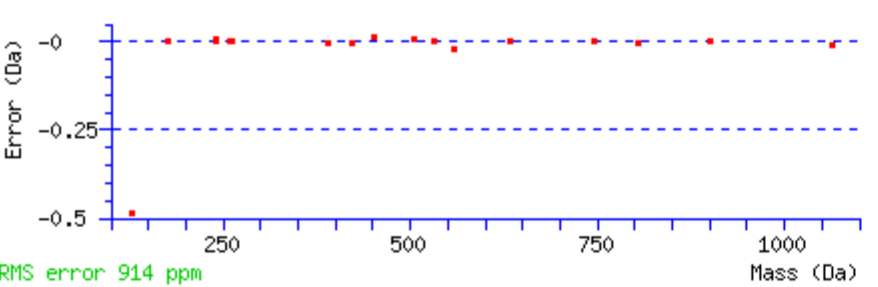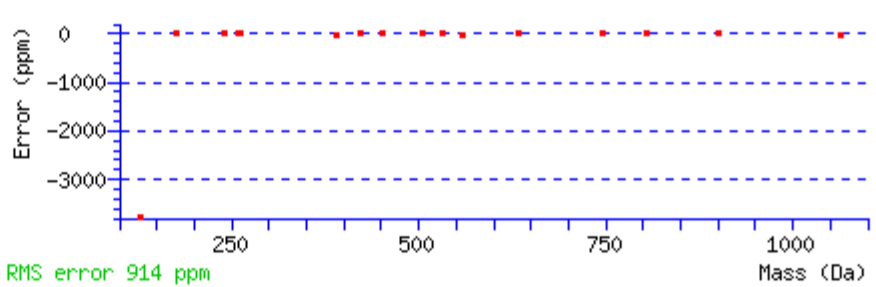

NCBI BLAST search of [EQYPGIEISR](#)  
(Parameters: blastp, nr protein database, expect=20000, no filter, PAM30)  
Other BLAST [web gateways](#)

### All matches to this query

| Score | Mr(calc):   | Delta     | Sequence                     |
|-------|-------------|-----------|------------------------------|
| 69.8  | 1319.635712 | 0.001056  | <a href="#">EQYPGIEISR</a>   |
| 11.0  | 1319.640442 | -0.003674 | <a href="#">RPSWMVDNKR</a>   |
| 4.7   | 1319.627884 | 0.008884  | <a href="#">KIDPVTMDPEK</a>  |
| 3.2   | 1319.640457 | -0.003689 | <a href="#">MGDKPPGFRGSR</a> |
| 2.9   | 1319.646957 | -0.010189 | <a href="#">GLSQEQLNEFR</a>  |
| 2.1   | 1319.646942 | -0.010174 | <a href="#">EQGNIYKPNNK</a>  |
| 2.0   | 1319.639084 | -0.002316 | <a href="#">LEIMSAQEIDR</a>  |
| 1.0   | 1319.639114 | -0.002346 | <a href="#">LDQPMTEIVSR</a>  |

# MASCOT Search Results

## Peptide View

MS/MS Fragmentation of **LIMNYLVTEGFK**

Found in **CT011\_HUMAN**, Protein C20orf11 OS=Homo sapiens GN=C20orf11 PE=1 SV=1

Match to Query 43811: 1442.755908 from(722.385230,2+) rtinseconds(3009) index(40240)

Title: Locus:1.1.1.2466.40

Data file 2011-11-14 - TFD - EP 8-5.mgf

Click mouse within plot area to zoom in by factor of two about that point

Or, Plot from  to  Da

Label all possible matches  Label matches used for scoring

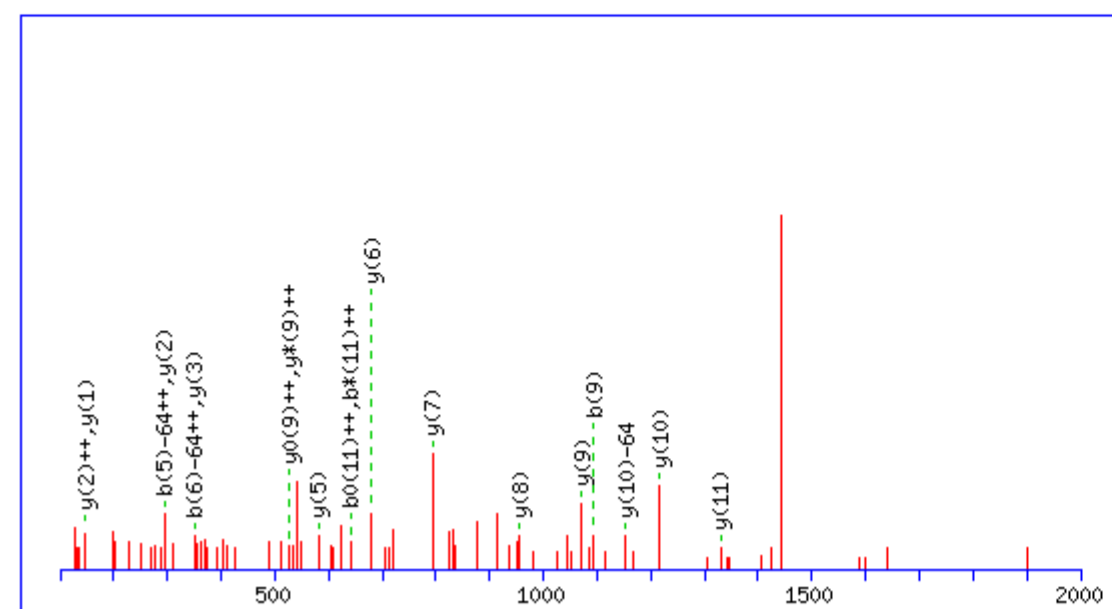

Monoisotopic mass of neutral peptide Mr(calc): 1442.747925

Fixed modifications: Propionamide (C) (apply to specified residues or termini only)

Variable modifications:

M3 : Oxidation (M), with neutral losses 0.000000 (shown in table), 63.998285

Ions Score: 52 Expect: 2.9e-005

Matches : 19/160 fragment ions using 37 most intense peaks ([help](#))

| #  | b                  | b <sup>++</sup> | b*          | b <sup>+++</sup>  | b <sup>0</sup> | b <sup>0++</sup>  | Seq. | y                  | y <sup>++</sup>   | y*          | y <sup>+++</sup>  | y <sup>0</sup> | y <sup>0++</sup>  | #  |
|----|--------------------|-----------------|-------------|-------------------|----------------|-------------------|------|--------------------|-------------------|-------------|-------------------|----------------|-------------------|----|
| 1  | 114.091340         | 57.549308       |             |                   |                |                   | L    |                    |                   |             |                   |                |                   | 12 |
| 2  | 227.175404         | 114.091340      |             |                   |                |                   | I    | <b>1330.671152</b> | 665.839214        | 1313.644603 | 657.325940        | 1312.660587    | 656.833932        | 11 |
| 3  | 374.210804         | 187.609040      |             |                   |                |                   | M    | <b>1217.587088</b> | 609.297182        | 1200.560539 | 600.783908        | 1199.576523    | 600.291900        | 10 |
| 4  | 488.253731         | 244.630504      | 471.227182  | 236.117229        |                |                   | N    | <b>1070.551688</b> | 535.779482        | 1053.525139 | <b>527.266208</b> | 1052.541123    | <b>526.774200</b> | 9  |
| 5  | 651.317060         | 326.162168      | 634.290511  | 317.648894        |                |                   | Y    | <b>956.508761</b>  | 478.758019        | 939.482212  | 470.244744        | 938.498196     | 469.752736        | 8  |
| 6  | 764.401124         | 382.704200      | 747.374575  | 374.190926        |                |                   | L    | <b>793.445432</b>  | 397.226354        | 776.418883  | 388.713079        | 775.434867     | 388.221071        | 7  |
| 7  | 863.469538         | 432.238407      | 846.442989  | 423.725133        |                |                   | V    | <b>680.361368</b>  | 340.684322        | 663.334819  | 332.171047        | 662.350803     | 331.679039        | 6  |
| 8  | 964.517217         | 482.762247      | 947.490668  | 474.248972        | 946.506652     | 473.756964        | T    | <b>581.292954</b>  | 291.150115        | 564.266405  | 282.636841        | 563.282389     | 282.144833        | 5  |
| 9  | <b>1093.559810</b> | 547.283543      | 1076.533261 | 538.770269        | 1075.549245    | 538.278260        | E    | 480.245275         | 240.626275        | 463.218726  | 232.113001        | 462.234710     | 231.620993        | 4  |
| 10 | 1150.581274        | 575.794275      | 1133.554725 | 567.281001        | 1132.570709    | 566.788992        | G    | <b>351.202682</b>  | 176.104979        | 334.176133  | 167.591704        |                |                   | 3  |
| 11 | 1297.649688        | 649.328482      | 1280.623139 | <b>640.815208</b> | 1279.639123    | <b>640.323199</b> | F    | <b>294.181218</b>  | <b>147.594247</b> | 277.154669  | 139.080973        |                |                   | 2  |
| 12 |                    |                 |             |                   |                |                   | K    | <b>147.112804</b>  | 74.060040         | 130.086255  | 65.546765         |                |                   | 1  |

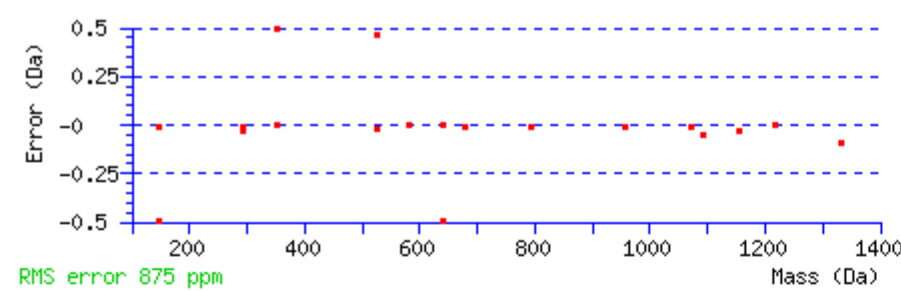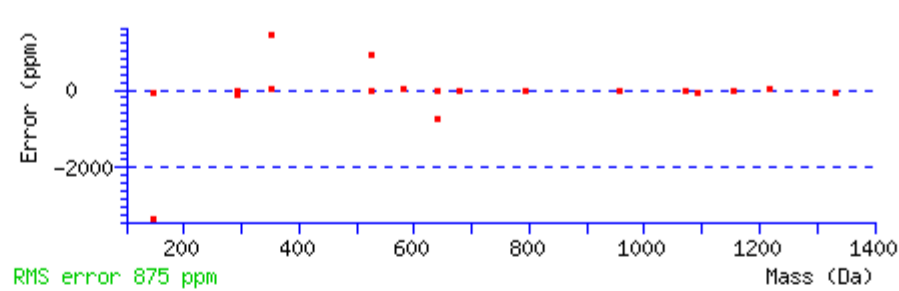

NCBI BLAST search of [LIMNYLVTEGFK](#)

(Parameters: blastp, nr protein database, expect=20000, no filter, PAM30)

Other BLAST [web gateways](#)

## All matches to this query

| Score | Mr(calc):   | Delta    | Sequence                      |
|-------|-------------|----------|-------------------------------|
| 52.2  | 1442.747925 | 0.007983 | <a href="#">LIMNYLVTEGFK</a>  |
| 3.8   | 1442.743896 | 0.012012 | <a href="#">ILGPLAPEMIDSR</a> |
| 3.3   | 1442.751755 | 0.004153 | <a href="#">ESHRLPVDIAYK</a>  |
| 0.7   | 1442.743896 | 0.012012 | <a href="#">ILGPLAPEMIDSR</a> |

# **MATRIX** SCIENCE Mascot Search Results

## Peptide View

### MS/MS Fragmentation of **EVDYSGLR**

Found in **CDV3\_HUMAN**, Protein CDV3 homolog OS=Homo sapiens GN=CDV3 PE=1 SV=1

Match to Query 5676: 937.457508 from(469.736030,2+) rtinseconds(1473) index(12719)

Title: Locus:1.1.1.944.10

Data file 2012-01-27 - TFD - Epitel - IEC - 10ul - 2.mgf

Click mouse within plot area to zoom in by factor of two about that point

Or, Plot from  to  Da

Label all possible matches  Label matches used for scoring

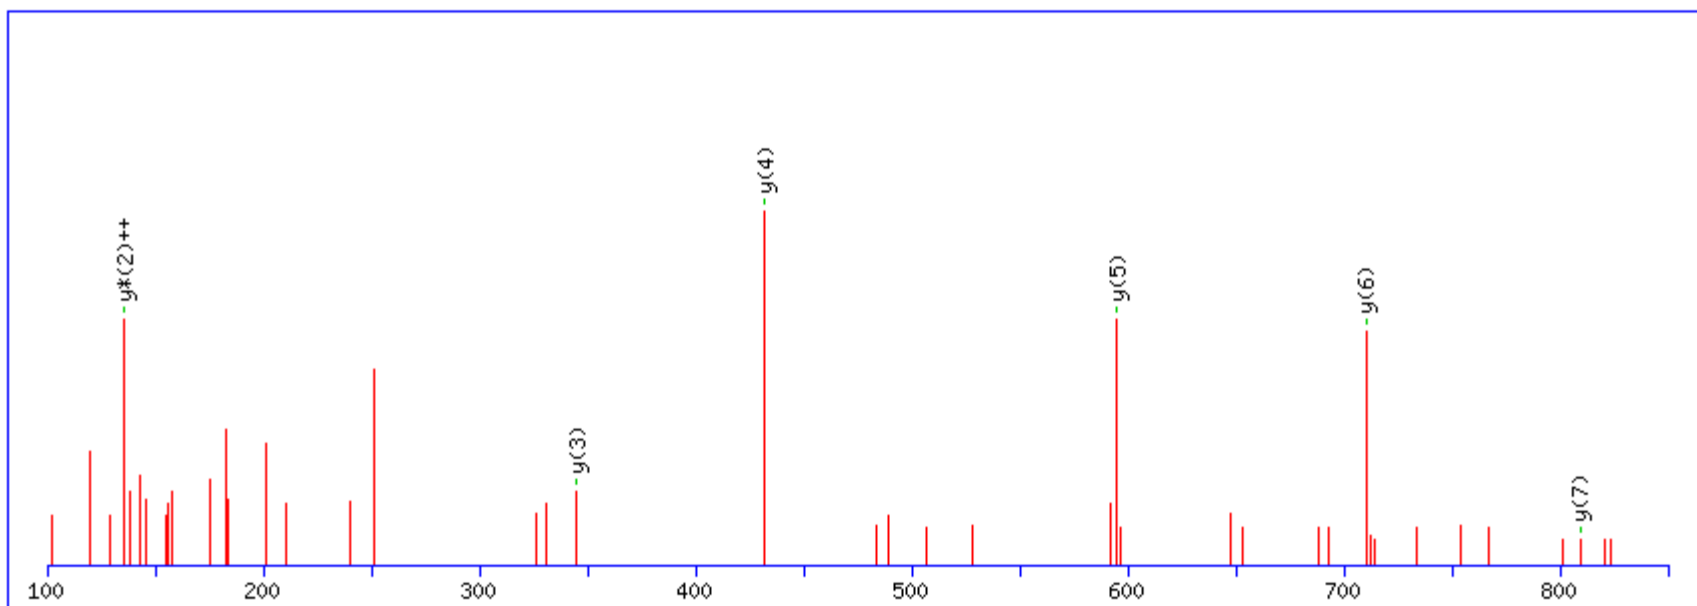

Monoisotopic mass of neutral peptide Mr(calc): 937.450500

Fixed modifications: Carbamidomethyl (C) (apply to specified residues or termini only)

Ions Score: 41 Expect: 0.00024

Matches : 6/64 fragment ions using 8 most intense peaks ([help](#))

| # | b          | b <sup>++</sup> | b <sup>0</sup> | b <sup>0++</sup> | Seq. | y          | y <sup>++</sup> | y <sup>*</sup> | y <sup>*++</sup> | y <sup>0</sup> | y <sup>0++</sup> | # |
|---|------------|-----------------|----------------|------------------|------|------------|-----------------|----------------|------------------|----------------|------------------|---|
| 1 | 130.049869 | 65.528572       | 112.039304     | 56.523290        | E    |            |                 |                |                  |                |                  | 8 |
| 2 | 229.118283 | 115.062780      | 211.107718     | 106.057497       | V    | 809.415194 | 405.211235      | 792.388645     | 396.697961       | 791.404629     | 396.205953       | 7 |
| 3 | 344.145226 | 172.576251      | 326.134661     | 163.570969       | D    | 710.346780 | 355.677028      | 693.320231     | 347.163754       | 692.336215     | 346.671746       | 6 |
| 4 | 507.208555 | 254.107916      | 489.197990     | 245.102633       | Y    | 595.319837 | 298.163557      | 578.293288     | 289.650282       | 577.309272     | 289.158274       | 5 |
| 5 | 594.240583 | 297.623930      | 576.230018     | 288.618647       | S    | 432.256508 | 216.631892      | 415.229959     | 208.118618       | 414.245943     | 207.626610       | 4 |
| 6 | 651.262047 | 326.134662      | 633.251482     | 317.129379       | G    | 345.224480 | 173.115878      | 328.197931     | 164.602604       |                |                  | 3 |
| 7 | 764.346111 | 382.676694      | 746.335546     | 373.671411       | L    | 288.203016 | 144.605146      | 271.176467     | 136.091872       |                |                  | 2 |
| 8 |            |                 |                |                  | R    | 175.118952 | 88.063114       | 158.092403     | 79.549840        |                |                  | 1 |

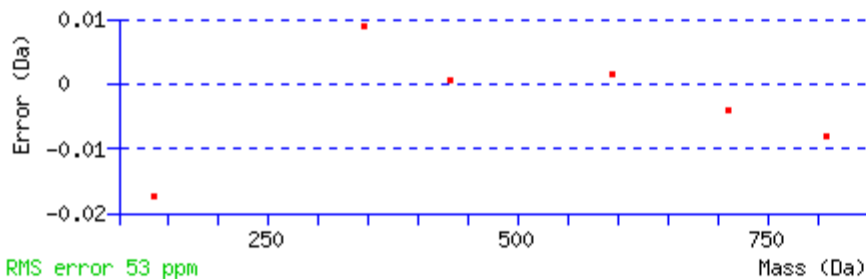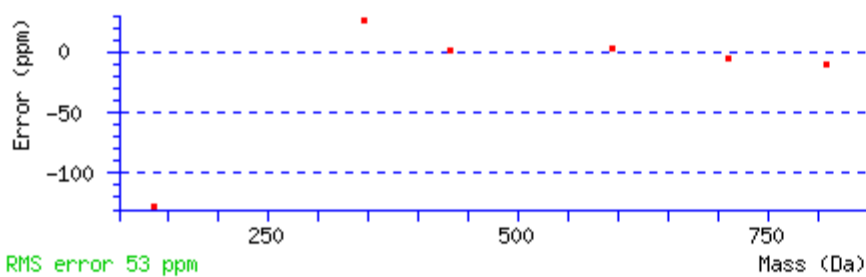

### NCBI BLAST search of **EVDYSGLR**

(Parameters: blastp, nr protein database, expect=20000, no filter, PAM30)

Other BLAST [web gateways](#)

### All matches to this query

| Score | Mr(calc):  | Delta     | Sequence                 |
|-------|------------|-----------|--------------------------|
| 41.0  | 937.450500 | 0.007008  | <a href="#">EVDYSGLR</a> |
| 2.5   | 937.461746 | -0.004238 | <a href="#">DIIHDPGR</a> |

**Peptide View**

MS/MS Fragmentation of **TQSSLVPALDFVR**

Found in **CUTA\_HUMAN**, Protein CutA OS=Homo sapiens GN=CUTA PE=1 SV=2

Match to Query 41178: 1532.818308 from(767.416430,2+) rtinseconds(3631) index(40708)

Title: Locus:1.1.1.2714.11

Data file 2011-11-12 - TFD - EP 6-7.mgf

Click mouse within plot area to zoom in by factor of two about that point

Or,  to  Da

Label all possible matches  Label matches used for scoring

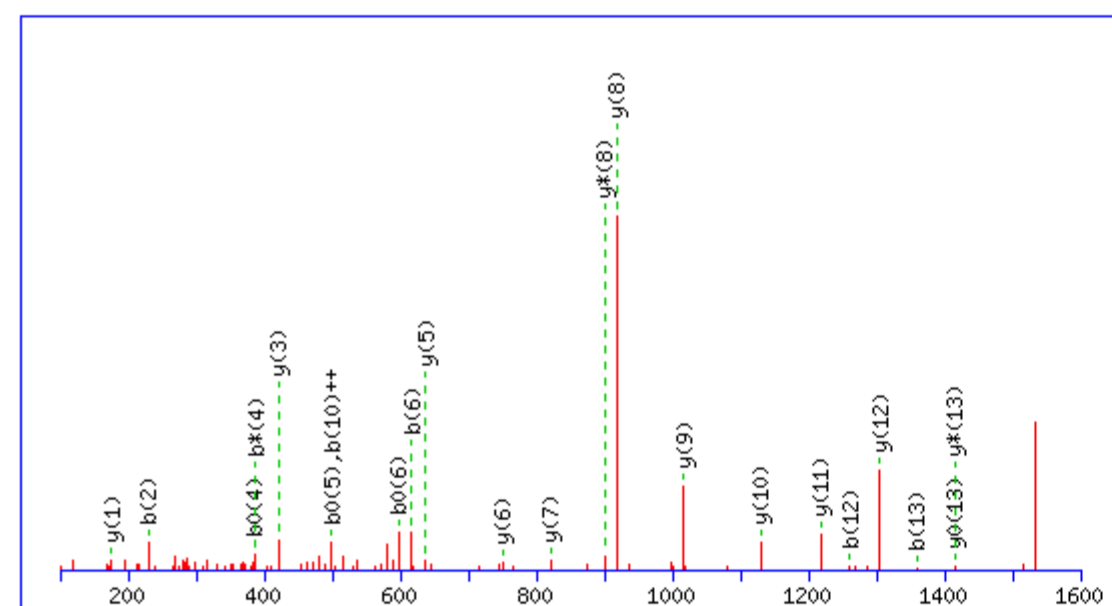

Monoisotopic mass of neutral peptide  $M_r(\text{calc})$ : 1532.819870

Fixed modifications: Propionamide (C) (apply to specified residues or termini only)

Ions Score: 89 Expect: 1.2e-008

Matches : 22/148 fragment ions using 28 most intense peaks ([help](#))

| #  | b                  | b <sup>++</sup>   | b <sup>*</sup>    | b <sup>*++</sup> | b <sup>0</sup>    | b <sup>0++</sup> | Seq. | y                  | y <sup>++</sup> | y <sup>*</sup>     | y <sup>*++</sup> | y <sup>0</sup>     | y <sup>0++</sup> | #  |
|----|--------------------|-------------------|-------------------|------------------|-------------------|------------------|------|--------------------|-----------------|--------------------|------------------|--------------------|------------------|----|
| 1  | 102.054955         | 51.531116         |                   |                  | 84.044390         | 42.525833        | T    |                    |                 |                    |                  |                    |                  | 14 |
| 2  | <b>230.113533</b>  | 115.560405        | 213.086984        | 107.047130       | 212.102968        | 106.555122       | Q    | 1432.779456        | 716.893366      | <b>1415.752907</b> | 708.380092       | <b>1414.768891</b> | 707.888084       | 13 |
| 3  | 317.145561         | 159.076418        | 300.119012        | 150.563144       | 299.134996        | 150.071136       | S    | <b>1304.720878</b> | 652.864077      | 1287.694329        | 644.350803       | 1286.710313        | 643.858795       | 12 |
| 4  | 404.177589         | 202.592432        | <b>387.151040</b> | 194.079158       | <b>386.167024</b> | 193.587150       | S    | <b>1217.688850</b> | 609.348063      | 1200.662301        | 600.834789       | 1199.678285        | 600.342781       | 11 |
| 5  | 517.261653         | 259.134465        | 500.235104        | 250.621190       | <b>499.251088</b> | 250.129182       | L    | <b>1130.656822</b> | 565.832049      | 1113.630273        | 557.318775       | 1112.646257        | 556.826767       | 10 |
| 6  | <b>616.330067</b>  | 308.668672        | 599.303518        | 300.155397       | <b>598.319502</b> | 299.663389       | V    | <b>1017.572758</b> | 509.290017      | 1000.546209        | 500.776743       | 999.562193         | 500.284735       | 9  |
| 7  | 713.382831         | 357.195054        | 696.356282        | 348.681779       | 695.372266        | 348.189771       | P    | <b>918.504344</b>  | 459.755810      | <b>901.477795</b>  | 451.242536       | 900.493779         | 450.750528       | 8  |
| 8  | 784.419945         | 392.713611        | 767.393396        | 384.200336       | 766.409380        | 383.708328       | A    | <b>821.451580</b>  | 411.229428      | 804.425031         | 402.716154       | 803.441015         | 402.224146       | 7  |
| 9  | 897.504009         | 449.255643        | 880.477460        | 440.742368       | 879.493444        | 440.250360       | L    | <b>750.414466</b>  | 375.710871      | 733.387917         | 367.197597       | 732.403901         | 366.705589       | 6  |
| 10 | 998.551688         | <b>499.779482</b> | 981.525139        | 491.266208       | 980.541123        | 490.774200       | T    | <b>637.330402</b>  | 319.168839      | 620.303853         | 310.655565       | 619.319837         | 310.163557       | 5  |
| 11 | 1113.578631        | 557.292954        | 1096.552082       | 548.779679       | 1095.568066       | 548.287671       | D    | 536.282723         | 268.645000      | 519.256174         | 260.131725       | 518.272158         | 259.639717       | 4  |
| 12 | <b>1260.647045</b> | 630.827161        | 1243.620496       | 622.313886       | 1242.636480       | 621.821878       | F    | <b>421.255780</b>  | 211.131528      | 404.229231         | 202.618254       |                    |                  | 3  |
| 13 | <b>1359.715459</b> | 680.361368        | 1342.688910       | 671.848093       | 1341.704894       | 671.356085       | V    | 274.187366         | 137.597321      | 257.160817         | 129.084047       |                    |                  | 2  |
| 14 |                    |                   |                   |                  |                   |                  | R    | <b>175.118952</b>  | 88.063114       | 158.092403         | 79.549839        |                    |                  | 1  |

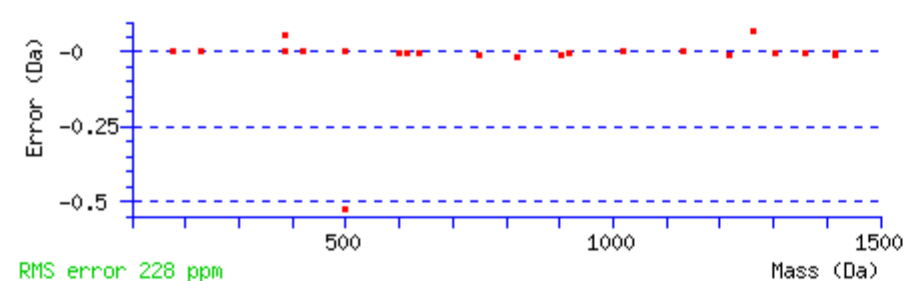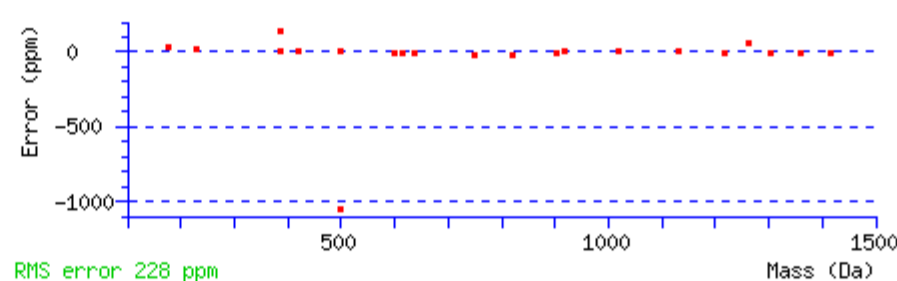

NCBI BLAST search of **TQSSLVPALDFVR**

(Parameters: blastp, nr protein database, expect=20000, no filter, PAM30)

Other BLAST [web gateways](#)

**All matches to this query**

| Score | $M_r(\text{calc})$ : | Delta     | Sequence                       |
|-------|----------------------|-----------|--------------------------------|
| 89.2  | 1532.819870          | -0.001562 | <a href="#">TQSSLVPALDFVR</a>  |
| 11.0  | 1532.816681          | 0.001627  | <a href="#">LMDAVMLQLTRAR</a>  |
| 7.5   | 1532.816681          | 0.001627  | <a href="#">LMDAVMLQLTRAR</a>  |
| 7.0   | 1532.819839          | -0.001531 | <a href="#">GLIEGKSDPYALVR</a> |
| 6.2   | 1532.823853          | -0.005545 | <a href="#">IYYTGKYQSLGIK</a>  |
| 4.1   | 1532.813309          | 0.004999  | <a href="#">ARTMALYNPIPVR</a>  |
| 3.0   | 1532.808594          | 0.009714  | <a href="#">ALPEPLPAPPEDKK</a> |
| 3.0   | 1532.808594          | 0.009714  | <a href="#">ALPEPLPAPPEDKK</a> |
| 2.9   | 1532.808594          | 0.009714  | <a href="#">ALPEPLPAPPEDKK</a> |
| 2.1   | 1532.816666          | 0.001642  | <a href="#">ELILMRNLMNVR</a>   |

# MASCOT SCIENCE Mascot Search Results

## Peptide View

MS/MS Fragmentation of **QTTQDAPEEVR**

Found in **CWC15\_HUMAN**, Protein CWC15 homolog OS=Homo sapiens GN=CWC15 PE=1 SV=2

Match to Query 608605: 1272.599568 from(637.307060,2+) rtinseconds(1056) index(244830)

Title: Locus:1.1.1.843.33

Data file C:\Program Files (x86)\Matrix Science\Mascot Daemon\mgf3 TFD - Epitel - R2\mascot\_daemon\_merge.mgf

Click mouse within plot area to zoom in by factor of two about that point

Or, Plot from  to  Da

Label all possible matches  Label matches used for scoring

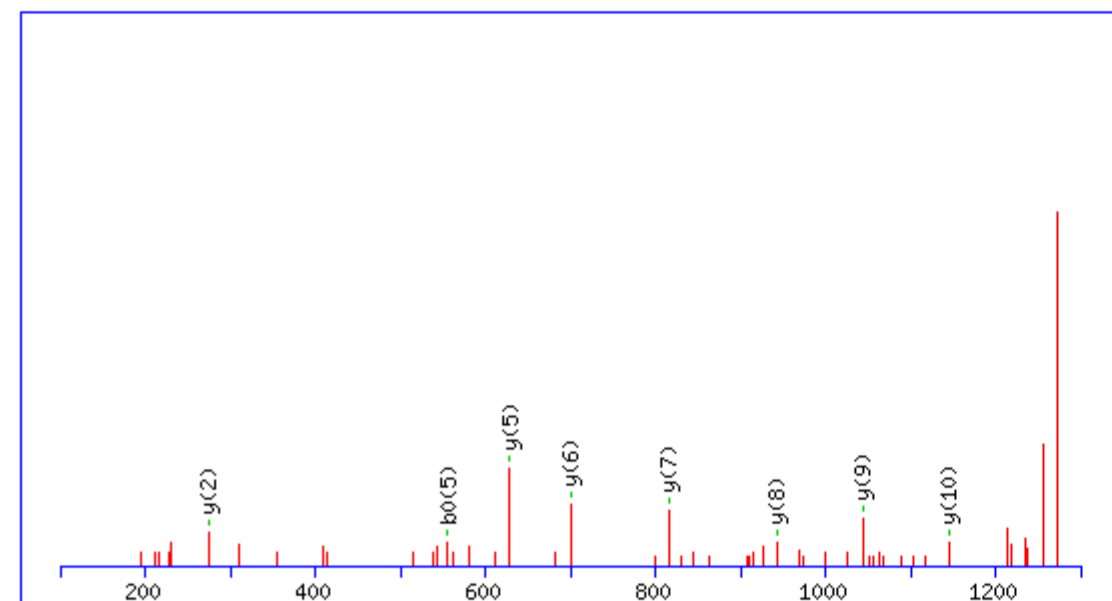

Monoisotopic mass of neutral peptide Mr(calc): 1272.594604

Fixed modifications: Carbamidomethyl (C) (apply to specified residues or termini only)

Ions Score: 58 Expect: 1.1e-005

Matches : 8/114 fragment ions using 11 most intense peaks [\(help\)](#)

| #  | b           | b <sup>++</sup> | b <sup>+</sup> | b <sup>+++</sup> | b <sup>0</sup>    | b <sup>0++</sup> | Seq. | y                  | y <sup>++</sup> | y <sup>+</sup> | y <sup>+++</sup> | y <sup>0</sup> | y <sup>0++</sup> | #  |
|----|-------------|-----------------|----------------|------------------|-------------------|------------------|------|--------------------|-----------------|----------------|------------------|----------------|------------------|----|
| 1  | 129.065854  | 65.036565       | 112.039305     | 56.523291        |                   |                  | Q    |                    |                 |                |                  |                |                  | 11 |
| 2  | 230.113533  | 115.560405      | 213.086984     | 107.047130       | 212.102968        | 106.555122       | T    | <b>1145.543309</b> | 573.275292      | 1128.516760    | 564.762018       | 1127.532744    | 564.270010       | 10 |
| 3  | 331.161212  | 166.084244      | 314.134663     | 157.570970       | 313.150647        | 157.078962       | T    | <b>1044.495630</b> | 522.751453      | 1027.469081    | 514.238179       | 1026.485065    | 513.746171       | 9  |
| 4  | 459.219790  | 230.113533      | 442.193241     | 221.600259       | 441.209225        | 221.108251       | Q    | <b>943.447951</b>  | 472.227614      | 926.421402     | 463.714339       | 925.437386     | 463.222331       | 8  |
| 5  | 574.246733  | 287.627005      | 557.220184     | 279.113730       | <b>556.236168</b> | 278.621722       | D    | <b>815.389373</b>  | 408.198325      | 798.362824     | 399.685050       | 797.378808     | 399.193042       | 7  |
| 6  | 645.283847  | 323.145562      | 628.257298     | 314.632287       | 627.273282        | 314.140279       | A    | <b>700.362430</b>  | 350.684853      | 683.335881     | 342.171579       | 682.351865     | 341.679571       | 6  |
| 7  | 742.336611  | 371.671944      | 725.310062     | 363.158669       | 724.326046        | 362.666661       | P    | <b>629.325316</b>  | 315.166296      | 612.298767     | 306.653022       | 611.314751     | 306.161014       | 5  |
| 8  | 871.379204  | 436.193240      | 854.352655     | 427.679966       | 853.368639        | 427.187958       | E    | 532.272552         | 266.639914      | 515.246003     | 258.126640       | 514.261987     | 257.634632       | 4  |
| 9  | 1000.421797 | 500.714537      | 983.395248     | 492.201262       | 982.411232        | 491.709254       | E    | 403.229959         | 202.118617      | 386.203410     | 193.605343       | 385.219394     | 193.113335       | 3  |
| 10 | 1099.490211 | 550.248744      | 1082.463662    | 541.735469       | 1081.479646       | 541.243461       | V    | <b>274.187366</b>  | 137.597321      | 257.160817     | 129.084046       |                |                  | 2  |
| 11 |             |                 |                |                  |                   |                  | R    | 175.118952         | 88.063114       | 158.092403     | 79.549839        |                |                  | 1  |

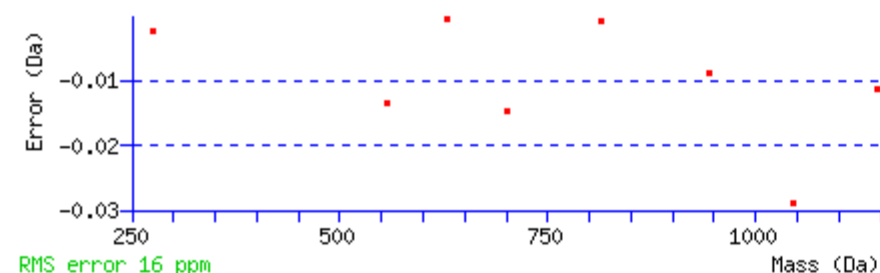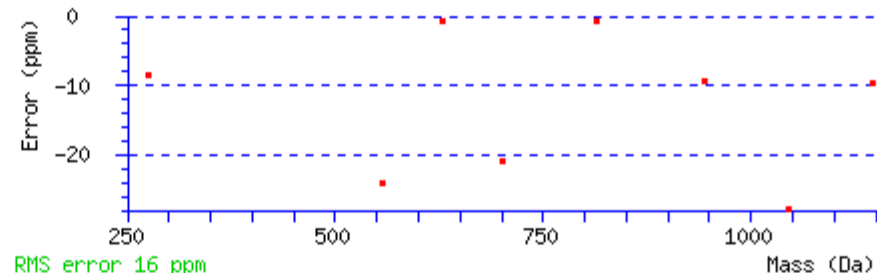

NCBI BLAST search of [QTTQDAPEEVR](#)

(Parameters: blastp, nr protein database, expect=20000, no filter, PAM30)

Other BLAST [web gateways](#)

## All matches to this query

| Score | Mr(calc):   | Delta     | Sequence                     |
|-------|-------------|-----------|------------------------------|
| 58.4  | 1272.594604 | 0.004964  | <a href="#">QTTQDAPEEVR</a>  |
| 5.2   | 1272.603348 | -0.003780 | <a href="#">ICKGDHWTR</a>    |
| 5.1   | 1272.602005 | -0.002437 | <a href="#">GLCVLGEDNAPL</a> |
| 4.6   | 1272.594604 | 0.004964  | <a href="#">QTKDAQGPDDAK</a> |
| 0.5   | 1272.599503 | 0.000065  | <a href="#">SIFCPLMSFR</a>   |
| 0.1   | 1272.594604 | 0.004964  | <a href="#">QSPTSKAPNTQD</a> |
| 0.1   | 1272.596146 | 0.003422  | <a href="#">KWPPPCAFTPG</a>  |
| 0.1   | 1272.596146 | 0.003422  | <a href="#">KWPPPCAFTPG</a>  |
| 0.1   | 1272.596146 | 0.003422  | <a href="#">KWPPPCAFTPG</a>  |
| 0.1   | 1272.592102 | 0.007466  | <a href="#">QCLEWDPAVR</a>   |



# **Mascot Search Results**

## Peptide View

MS/MS Fragmentation of **ILKVSMK**

Found in **DLK1\_HUMAN**, Protein delta homolog 1 OS=Homo sapiens GN=DLK1 PE=1 SV=3

Match to Query 2968: 833.501668 from(417.758110,2+) rtinseconds(2262) index(27350)

Title: Locus:1.1.1.2292.4

Data file 2011-11-13 - TFD - EP 7-4.mgf

Click mouse within plot area to zoom in by factor of two about that point

Or, Plot from  to  Da

Label all possible matches  Label matches used for scoring

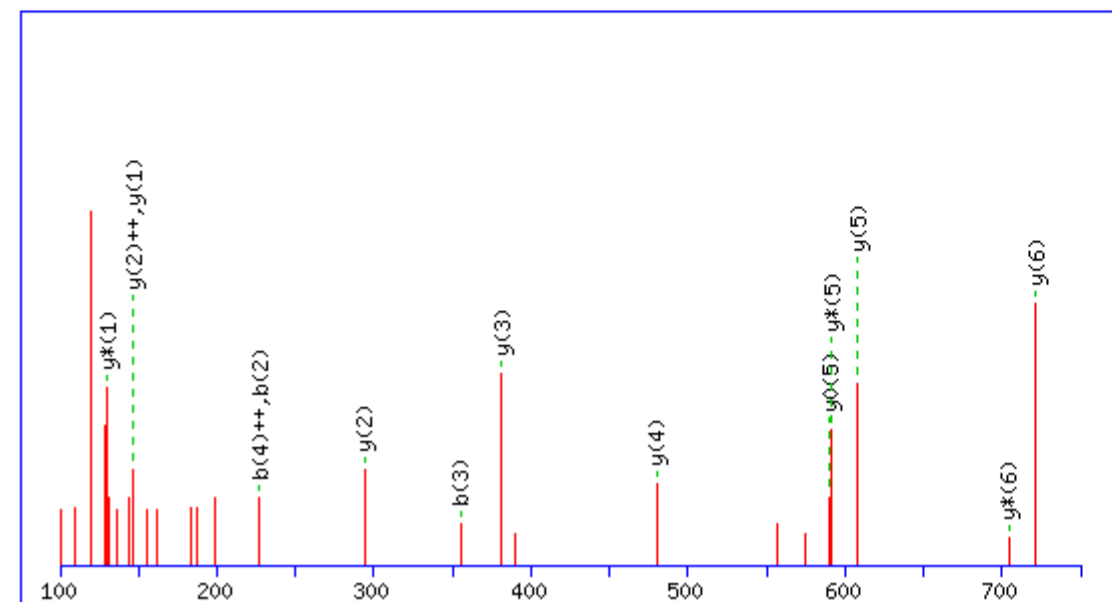

Monoisotopic mass of neutral peptide Mr(calc): 833.504440

Fixed modifications: Propionamide (C) (apply to specified residues or termini only)

Variable modifications:

M6 : Oxidation (M), with neutral losses 0.000000 (shown in table), 63.998285

Ions Score: 51 Expect: 2.5e-005

Matches : 14/90 fragment ions using 18 most intense peaks ([help](#))

| # | b                 | b <sup>++</sup>   | b <sup>+</sup> | b <sup>+++</sup> | b <sup>0</sup> | b <sup>0++</sup> | Seq. | y                 | y <sup>++</sup>   | y <sup>+</sup>    | y <sup>+++</sup> | y <sup>0</sup>    | y <sup>0++</sup> | # |
|---|-------------------|-------------------|----------------|------------------|----------------|------------------|------|-------------------|-------------------|-------------------|------------------|-------------------|------------------|---|
| 1 | 114.091340        | 57.549308         |                |                  |                |                  | I    |                   |                   |                   |                  |                   |                  | 7 |
| 2 | <b>227.175404</b> | 114.091340        |                |                  |                |                  | L    | <b>721.427673</b> | 361.217475        | <b>704.401124</b> | 352.704200       | 703.417108        | 352.212192       | 6 |
| 3 | <b>355.270367</b> | 178.138822        | 338.243818     | 169.625547       |                |                  | K    | <b>608.343609</b> | 304.675443        | <b>591.317060</b> | 296.162168       | <b>590.333044</b> | 295.670160       | 5 |
| 4 | 454.338781        | <b>227.673029</b> | 437.312232     | 219.159754       |                |                  | V    | <b>480.248646</b> | 240.627961        | 463.222097        | 232.114687       | 462.238081        | 231.622679       | 4 |
| 5 | 541.370809        | 271.189043        | 524.344260     | 262.675768       | 523.360244     | 262.183760       | S    | <b>381.180232</b> | 191.093754        | 364.153683        | 182.580480       | 363.169667        | 182.088472       | 3 |
| 6 | 688.406209        | 344.706743        | 671.379660     | 336.193468       | 670.395644     | 335.701460       | M    | <b>294.148204</b> | <b>147.577740</b> | 277.121655        | 139.064465       |                   |                  | 2 |
| 7 |                   |                   |                |                  |                |                  | K    | <b>147.112804</b> | 74.060040         | <b>130.086255</b> | 65.546765        |                   |                  | 1 |

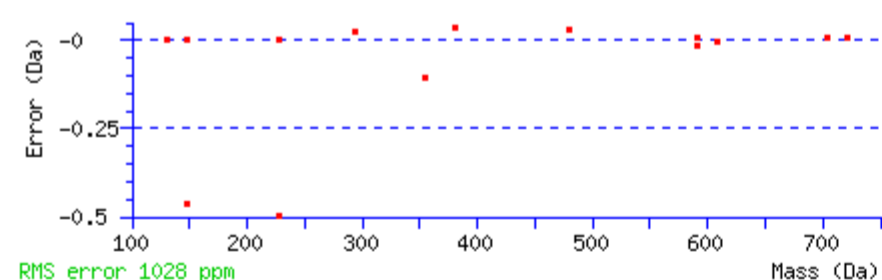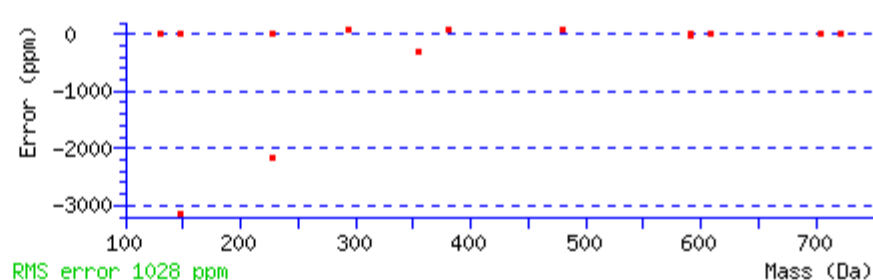

NCBI BLAST search of **ILKVSMK**

(Parameters: blastp, nr protein database, expect=20000, no filter, PAM30)

Other BLAST [web gateways](#)

All matches to this query

| Score | Mr(calc):  | Delta     | Sequence                |
|-------|------------|-----------|-------------------------|
| 51.3  | 833.504440 | -0.002772 | <a href="#">ILKVSMK</a> |
| 51.3  | 833.501083 | 0.000585  | <a href="#">ILQVSFK</a> |
| 22.3  | 833.504440 | -0.002772 | <a href="#">LIKSMVK</a> |
| 10.0  | 833.504440 | -0.002772 | <a href="#">ILMSKVK</a> |
| 10.0  | 833.501083 | 0.000585  | <a href="#">LPSFKVK</a> |
| 9.1   | 833.501083 | 0.000585  | <a href="#">KPLSVFK</a> |
| 7.5   | 833.501083 | 0.000585  | <a href="#">INLTVFK</a> |
| 3.8   | 833.501068 | 0.000600  | <a href="#">KLFEGLK</a> |
| 0.9   | 833.501068 | 0.000600  | <a href="#">FIKGEIK</a> |

# MASCOT Search Results

## Peptide View

MS/MS Fragmentation of **LPDLKSSVK**  
 Found in **DLN1\_HUMAN**, Protein DLN-1 OS=Homo sapiens GN=C10orf140 PE=2 SV=1

Match to Query 10532: 1001.577068 from(501.795810,2+) rtinseconds(1935) index(21535)  
 Title: Locus:1.1.1.2225.19  
 Data file 2011-11-10 - TFD - EP 4-3.mgf

Click mouse within plot area to zoom in by factor of two about that point

Or, Plot from  to  Da

Label all possible matches  Label matches used for scoring

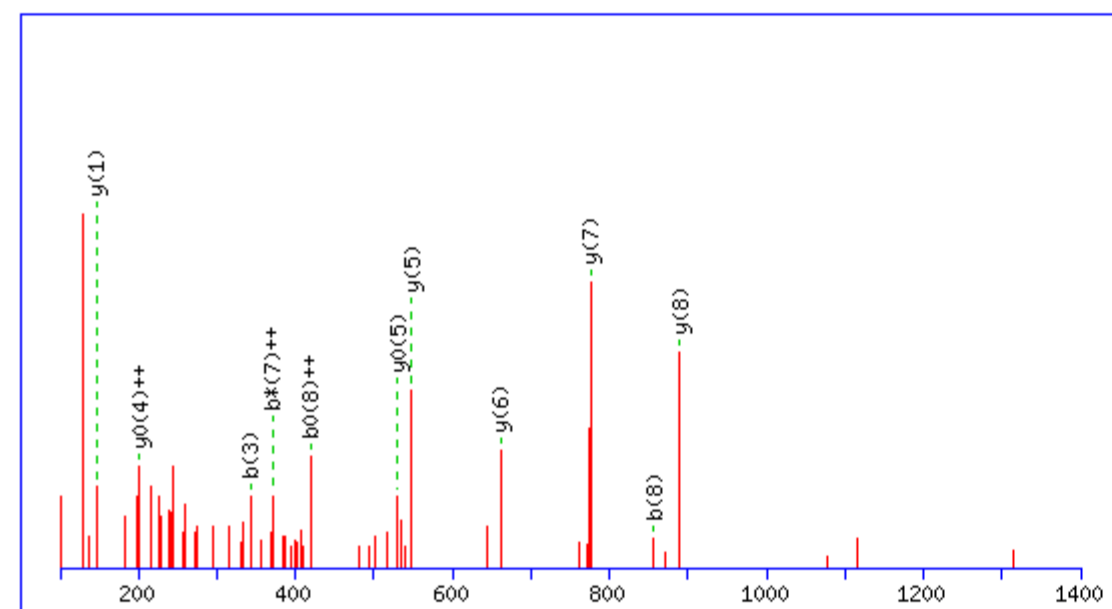

Monoisotopic mass of neutral peptide  $M_r(\text{calc})$ : 1001.575699  
 Fixed modifications: Propionamide (C) (apply to specified residues or termini only)  
 Variable modifications:  
 P2 : Oxidation (P)  
 Ions Score: 34 Expect: 0.003  
 Matches : 11/80 fragment ions using 16 most intense peaks ([help](#))

| # | b          | b <sup>++</sup> | b <sup>*</sup> | b <sup>*++</sup> | b <sup>0</sup> | b <sup>0++</sup> | Seq. | y          | y <sup>++</sup> | y <sup>*</sup> | y <sup>*++</sup> | y <sup>0</sup> | y <sup>0++</sup> | # |
|---|------------|-----------------|----------------|------------------|----------------|------------------|------|------------|-----------------|----------------|------------------|----------------|------------------|---|
| 1 | 114.091340 | 57.549308       |                |                  |                |                  | L    |            |                 |                |                  |                |                  | 9 |
| 2 | 227.139019 | 114.073147      |                |                  |                |                  | P    | 889.498923 | 445.253100      | 872.472374     | 436.739825       | 871.488358     | 436.247817       | 8 |
| 3 | 342.165962 | 171.586619      |                |                  | 324.155397     | 162.581336       | D    | 776.451244 | 388.729260      | 759.424695     | 380.215986       | 758.440679     | 379.723978       | 7 |
| 4 | 455.250026 | 228.128651      |                |                  | 437.239461     | 219.123369       | L    | 661.424301 | 331.215789      | 644.397752     | 322.702514       | 643.413736     | 322.210506       | 6 |
| 5 | 583.344989 | 292.176133      | 566.318440     | 283.662858       | 565.334424     | 283.170850       | K    | 548.340237 | 274.673757      | 531.313688     | 266.160482       | 530.329672     | 265.668474       | 5 |
| 6 | 670.377017 | 335.692147      | 653.350468     | 327.178872       | 652.366452     | 326.686864       | S    | 420.245274 | 210.626275      | 403.218725     | 202.113000       | 402.234709     | 201.620992       | 4 |
| 7 | 757.409045 | 379.208161      | 740.382496     | 370.694886       | 739.398480     | 370.202878       | S    | 333.213246 | 167.110261      | 316.186697     | 158.596986       | 315.202681     | 158.104978       | 3 |
| 8 | 856.477459 | 428.742368      | 839.450910     | 420.229093       | 838.466894     | 419.737085       | V    | 246.181218 | 123.594247      | 229.154669     | 115.080972       |                |                  | 2 |
| 9 |            |                 |                |                  |                |                  | K    | 147.112804 | 74.060040       | 130.086255     | 65.546765        |                |                  | 1 |

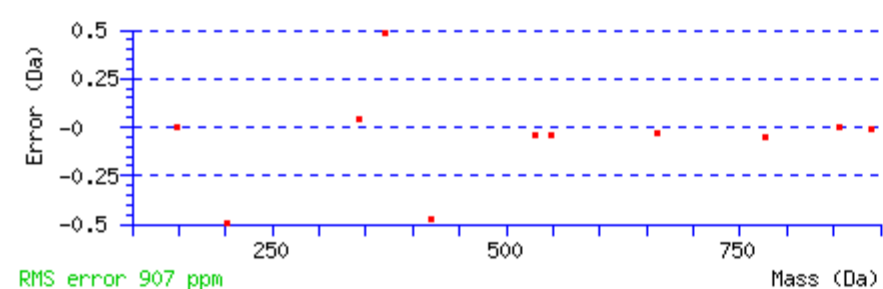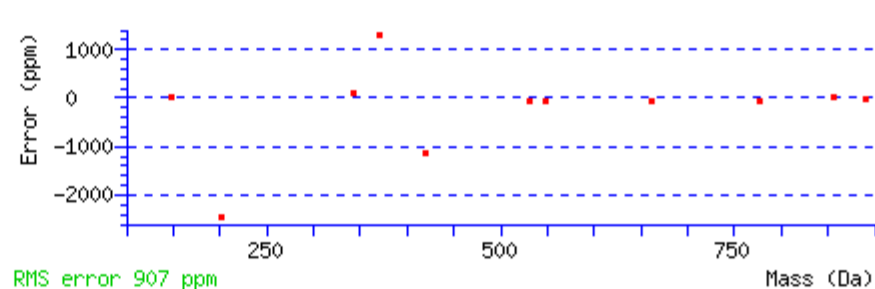

NCBI BLAST search of **LPDLKSSVK**  
 (Parameters: blastp, nr protein database, expect=20000, no filter, PAM30)  
 Other BLAST [web gateways](#)

## All matches to this query

| Score | $M_r(\text{calc})$ : | Delta     | Sequence                  |
|-------|----------------------|-----------|---------------------------|
| 33.8  | 1001.575699          | 0.001369  | <a href="#">LPDLKSSVK</a> |
| 32.2  | 1001.575699          | 0.001369  | <a href="#">LIDIVSSQK</a> |
| 10.0  | 1001.575699          | 0.001369  | <a href="#">LPSSVEVKK</a> |
| 9.0   | 1001.580399          | -0.003331 | <a href="#">ILSGRMLR</a>  |
| 8.7   | 1001.575684          | 0.001384  | <a href="#">IDVASIKEK</a> |
| 8.0   | 1001.586929          | -0.009861 | <a href="#">LSNNTKVVK</a> |
| 7.0   | 1001.586929          | -0.009861 | <a href="#">ISPATLRK</a>  |
| 6.1   | 1001.575684          | 0.001384  | <a href="#">EPILSTAKK</a> |
| 5.6   | 1001.575699          | 0.001369  | <a href="#">VEELVTGKK</a> |
| 5.2   | 1001.586914          | -0.009846 | <a href="#">IESLGLRSK</a> |

# **MASCOT** Mascot Search Results

## Peptide View

MS/MS Fragmentation of **VDLQSLPTR**

Found in **DPY30\_HUMAN**, Protein dpy-30 homolog OS=Homo sapiens GN=DPY30 PE=1 SV=1

Match to Query 297265: 1027.572008 from(514.793280,2+) rtinseconds(1999) index(511877)

Title: Locus:1.1.1.1094.10

Data file C:\Program Files (x86)\Matrix Science\Mascot Daemon\mgf3 TFD - Epitel - R2\mascot\_daemon\_merge.mgf

Click mouse within plot area to zoom in by factor of two about that point

Or, Plot from  to  Da

Label all possible matches  Label matches used for scoring

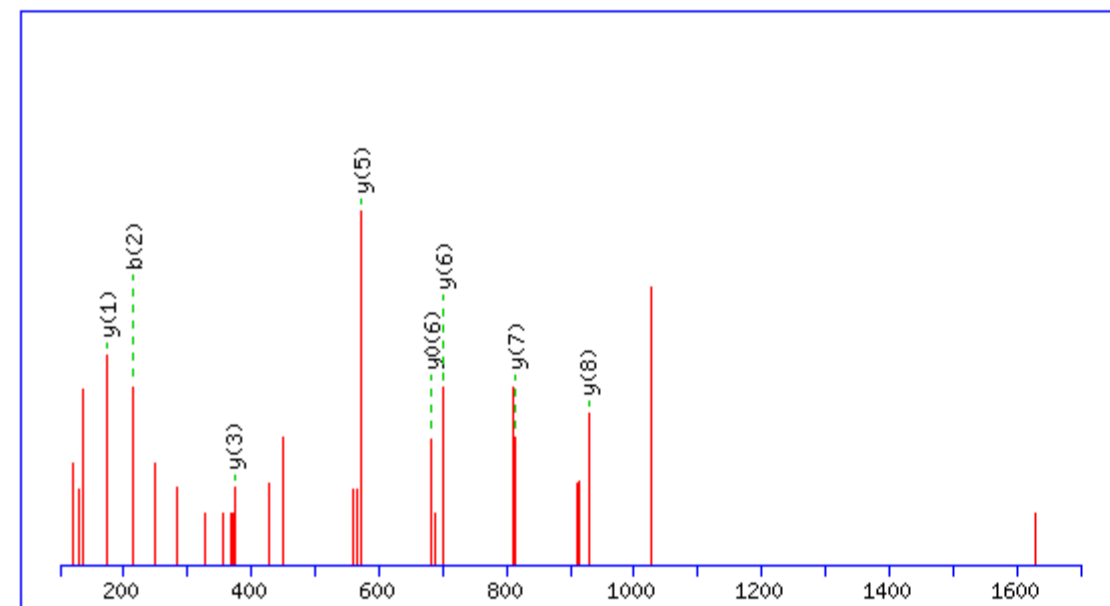

Monoisotopic mass of neutral peptide Mr(calc): 1027.566208

Fixed modifications: Carbamidomethyl (C) (apply to specified residues or termini only)

Ions Score: 34 Expect: 0.0049

Matches : 8/86 fragment ions using 17 most intense peaks ([help](#))

| # | b                 | b <sup>++</sup> | b <sup>*</sup> | b <sup>*++</sup> | b <sup>0</sup> | b <sup>0++</sup> | Seq. | y                 | y <sup>++</sup> | y <sup>*</sup> | y <sup>*++</sup> | y <sup>0</sup>    | y <sup>0++</sup> | # |
|---|-------------------|-----------------|----------------|------------------|----------------|------------------|------|-------------------|-----------------|----------------|------------------|-------------------|------------------|---|
| 1 | 100.075690        | 50.541483       |                |                  |                |                  | V    |                   |                 |                |                  |                   |                  | 9 |
| 2 | <b>215.102633</b> | 108.054954      |                |                  | 197.092068     | 99.049672        | D    | <b>929.505072</b> | 465.256174      | 912.478523     | 456.742900       | 911.494507        | 456.250892       | 8 |
| 3 | 328.186697        | 164.596986      |                |                  | 310.176132     | 155.591704       | L    | <b>814.478129</b> | 407.742703      | 797.451580     | 399.229428       | 796.467564        | 398.737420       | 7 |
| 4 | 456.245275        | 228.626275      | 439.218726     | 220.113001       | 438.234710     | 219.620993       | Q    | <b>701.394065</b> | 351.200671      | 684.367516     | 342.687396       | <b>683.383500</b> | 342.195388       | 6 |
| 5 | 543.277303        | 272.142290      | 526.250754     | 263.629015       | 525.266738     | 263.137007       | S    | <b>573.335487</b> | 287.171382      | 556.308938     | 278.658107       | 555.324922        | 278.166099       | 5 |
| 6 | 656.361367        | 328.684322      | 639.334818     | 320.171047       | 638.350802     | 319.679039       | L    | 486.303459        | 243.655368      | 469.276910     | 235.142093       | 468.292894        | 234.650085       | 4 |
| 7 | 753.414131        | 377.210704      | 736.387582     | 368.697429       | 735.403566     | 368.205421       | P    | <b>373.219395</b> | 187.113336      | 356.192846     | 178.600061       | 355.208830        | 178.108053       | 3 |
| 8 | 854.461810        | 427.734543      | 837.435261     | 419.221269       | 836.451245     | 418.729261       | T    | 276.166631        | 138.586954      | 259.140082     | 130.073679       | 258.156066        | 129.581671       | 2 |
| 9 |                   |                 |                |                  |                |                  | R    | <b>175.118952</b> | 88.063114       | 158.092403     | 79.549840        |                   |                  | 1 |

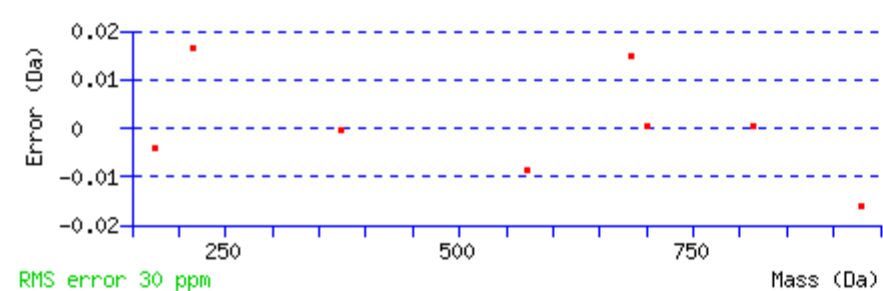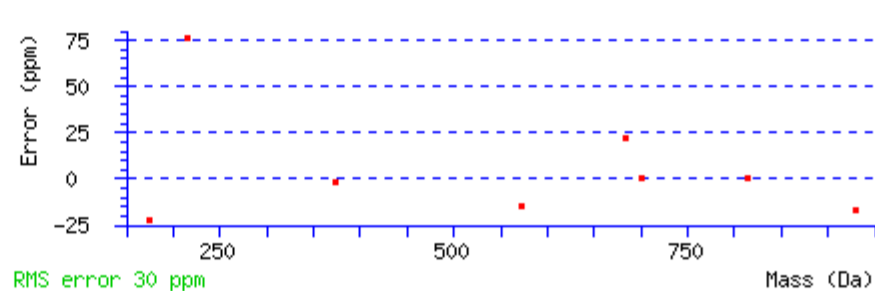

NCBI BLAST search of **VDLQSLPTR**

(Parameters: blastp, nr protein database, expect=20000, no filter, PAM30)

Other BLAST [web gateways](#)

## All matches to this query

| Score | Mr(calc):   | Delta     | Sequence                   |
|-------|-------------|-----------|----------------------------|
| 33.8  | 1027.566208 | 0.005800  | <a href="#">VDLQSLPTR</a>  |
| 8.6   | 1027.577408 | -0.005400 | <a href="#">VENIRLER</a>   |
| 8.2   | 1027.581467 | -0.009459 | <a href="#">IPQTVLWR</a>   |
| 6.8   | 1027.566193 | 0.005815  | <a href="#">LLTLPNGER</a>  |
| 5.6   | 1027.570236 | 0.001772  | <a href="#">TLITPGPWK</a>  |
| 5.6   | 1027.570236 | 0.001772  | <a href="#">TLITPGPWK</a>  |
| 2.4   | 1027.566193 | 0.005815  | <a href="#">VALLEDVNR</a>  |
| 2.1   | 1027.566208 | 0.005800  | <a href="#">VLAVTDSPAR</a> |
| 2.0   | 1027.577423 | -0.005415 | <a href="#">VQIRLEDR</a>   |
| 0.9   | 1027.566193 | 0.005815  | <a href="#">TLEAQLTPR</a>  |

Mascot: <http://www.matrixscience.com/>

**MATRIX SCIENCE Mascot Search Results**

**Peptide View**

MS/MS Fragmentation of **LENLGIPEEELLR**

Found in **NC2B\_HUMAN**, Protein Dr1 OS=Homo sapiens GN=DR1 PE=1 SV=1

Match to Query 50929: 1523.816508 from(762.915530,2+) rtinseconds(3294) index(44565)

Title: Locus:1.1.1.2509.27

Data file 2011-11-10 - TFD - EP 4-6.mgf

Click mouse within plot area to zoom in by factor of two about that point

Or, Plot from  to  Da

Label all possible matches  Label matches used for scoring

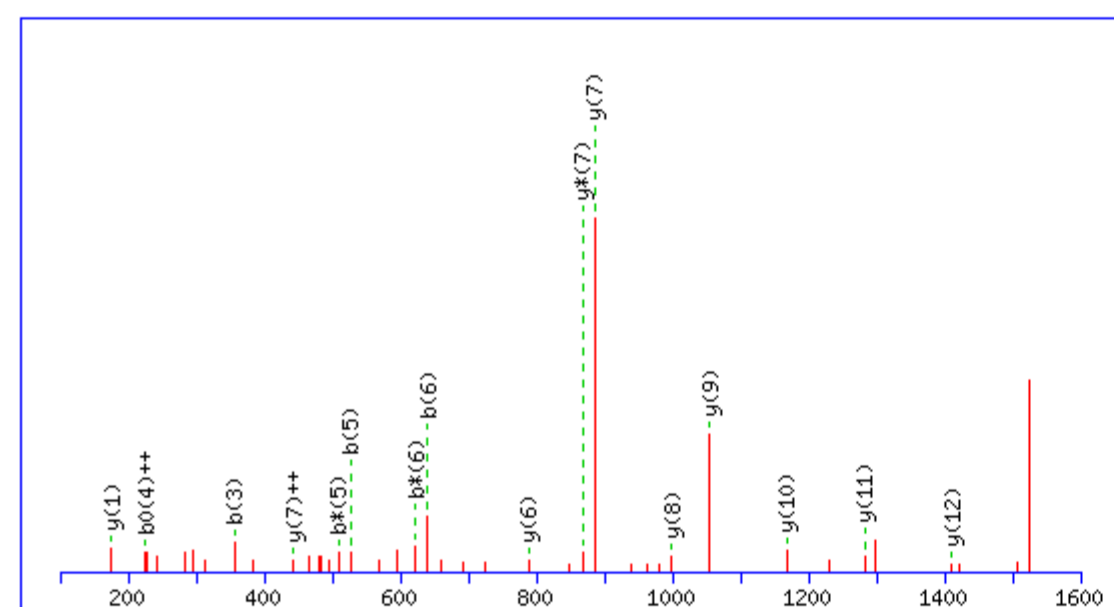

Monoisotopic mass of neutral peptide Mr(calc): 1523.819473

Fixed modifications: Propionamide (C) (apply to specified residues or termini only)

Ions Score: 57 Expect: 2e-005

Matches : 16/132 fragment ions using 25 most intense peaks [\(help\)](#)

| #  | b           | b <sup>++</sup> | b*          | b <sup>+++</sup> | b <sup>0</sup> | b <sup>0++</sup> | Seq. | y           | y <sup>++</sup> | y*          | y <sup>+++</sup> | y <sup>0</sup> | y <sup>0++</sup> | #  |
|----|-------------|-----------------|-------------|------------------|----------------|------------------|------|-------------|-----------------|-------------|------------------|----------------|------------------|----|
| 1  | 114.091340  | 57.549308       |             |                  |                |                  | L    |             |                 |             |                  |                |                  | 13 |
| 2  | 243.133933  | 122.070605      |             |                  | 225.123368     | 113.065322       | E    | 1411.742735 | 706.375006      | 1394.716186 | 697.861731       | 1393.732170    | 697.369723       | 12 |
| 3  | 357.176860  | 179.092068      | 340.150311  | 170.578794       | 339.166295     | 170.086786       | N    | 1282.700142 | 641.853709      | 1265.673593 | 633.340435       | 1264.689577    | 632.848426       | 11 |
| 4  | 470.260924  | 235.634100      | 453.234375  | 227.120826       | 452.250359     | 226.628818       | L    | 1168.657215 | 584.832246      | 1151.630666 | 576.318971       | 1150.646650    | 575.826963       | 10 |
| 5  | 527.282388  | 264.144832      | 510.255839  | 255.631558       | 509.271823     | 255.139550       | G    | 1055.573151 | 528.290213      | 1038.546602 | 519.776939       | 1037.562586    | 519.284931       | 9  |
| 6  | 640.366452  | 320.686864      | 623.339903  | 312.173590       | 622.355887     | 311.681582       | I    | 998.551687  | 499.779481      | 981.525138  | 491.266207       | 980.541122     | 490.774199       | 8  |
| 7  | 737.419216  | 369.213246      | 720.392667  | 360.699972       | 719.408651     | 360.207964       | P    | 885.467623  | 443.237449      | 868.441074  | 434.724175       | 867.457058     | 434.232167       | 7  |
| 8  | 866.461809  | 433.734543      | 849.435260  | 425.221268       | 848.451244     | 424.729260       | E    | 788.414859  | 394.711067      | 771.388310  | 386.197793       | 770.404294     | 385.705785       | 6  |
| 9  | 995.504402  | 498.255839      | 978.477853  | 489.742565       | 977.493837     | 489.250557       | E    | 659.372266  | 330.189771      | 642.345717  | 321.676496       | 641.361701     | 321.184488       | 5  |
| 10 | 1124.546995 | 562.777136      | 1107.520446 | 554.263861       | 1106.536430    | 553.771853       | E    | 530.329673  | 265.668474      | 513.303124  | 257.155200       | 512.319108     | 256.663192       | 4  |
| 11 | 1237.631059 | 619.319168      | 1220.604510 | 610.805893       | 1219.620494    | 610.313885       | L    | 401.287080  | 201.147178      | 384.260531  | 192.633903       |                |                  | 3  |
| 12 | 1350.715123 | 675.861200      | 1333.688574 | 667.347925       | 1332.704558    | 666.855917       | L    | 288.203016  | 144.605146      | 271.176467  | 136.091871       |                |                  | 2  |
| 13 |             |                 |             |                  |                |                  | R    | 175.118952  | 88.063114       | 158.092403  | 79.549839        |                |                  | 1  |

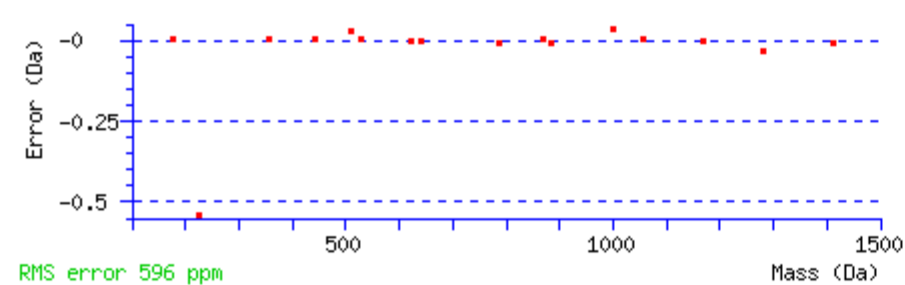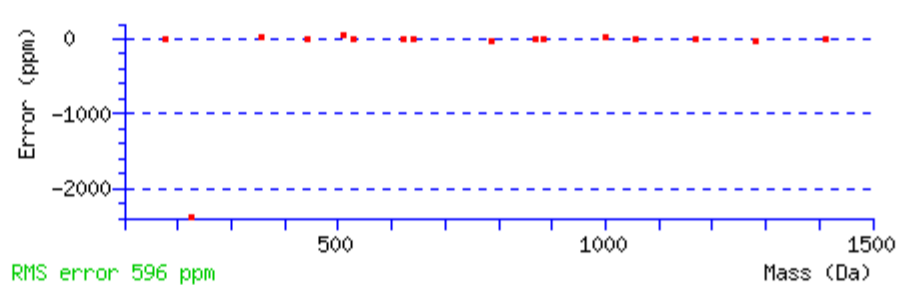

NCBI BLAST search of **LENLGIPEEELLR**

(Parameters: blastp, nr protein database, expect=20000, no filter, PAM30)

Other BLAST [web gateways](#)

**All matches to this query**

| Score | Mr(calc):   | Delta     | Sequence                        |
|-------|-------------|-----------|---------------------------------|
| 56.8  | 1523.819473 | -0.002965 | <a href="#">LENLGIPEEELLR</a>   |
| 15.3  | 1523.820847 | -0.004339 | <a href="#">LLGWLRGEPGAPSR</a>  |
| 15.3  | 1523.820847 | -0.004339 | <a href="#">LLGWLRGEPGAPSR</a>  |
| 13.0  | 1523.830795 | -0.014287 | <a href="#">LPGSVGTPLPGVQVR</a> |
| 9.5   | 1523.820847 | -0.004339 | <a href="#">KDPIGPLEHRPLH</a>   |
| 6.0   | 1523.805603 | 0.010905  | <a href="#">LPRATPATAPGTSPR</a> |
| 4.7   | 1523.824219 | -0.007711 | <a href="#">LLRPGQPMSPQLR</a>   |
| 4.4   | 1523.820831 | -0.004323 | <a href="#">IPLARHAFEEGLR</a>   |
| 4.2   | 1523.809616 | 0.006892  | <a href="#">LLFQPDQNAPPIR</a>   |
| 4.1   | 1523.805603 | 0.010905  | <a href="#">LPRATPATAPGTSPR</a> |

# **MATRIX** SCIENCE Mascot Search Results

## Peptide View

MS/MS Fragmentation of **IPIEPHPK**

Found in **F123A\_HUMAN**, Protein FAM123A OS=Homo sapiens GN=FAM123A PE=2 SV=3

Match to Query 210229: 961.521708 from(481.768130,2+) rtinseconds(1991) index(755295)

Title: Locus:1.1.1.1103.15

Data file C:\Program Files (x86)\Matrix Science\Mascot Daemon\mgf3 TFD - Epitel - R2\mascot\_daemon\_merge.mgf

Click mouse within plot area to zoom in by factor of two about that point

Or, Plot from  to  Da

Label all possible matches  Label matches used for scoring

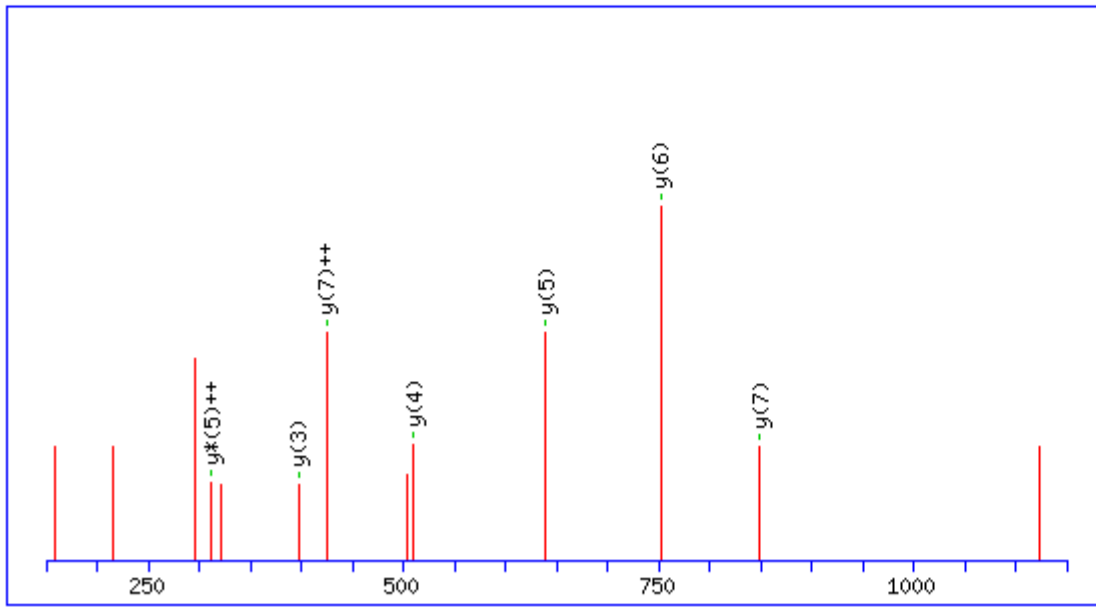

Monoisotopic mass of neutral peptide Mr(calc): 961.523270

Fixed modifications: Carbamidomethyl (C) (apply to specified residues or termini only)

Variable modifications:

P5 : Oxidation (P)

P7 : Oxidation (P)

Ions Score: 35 Expect: 0.0029

Matches : 7/56 fragment ions using 11 most intense peaks [\(help\)](#)

| # | b          | b <sup>++</sup> | b <sup>0</sup> | b <sup>0++</sup> | Seq. | y          | y <sup>++</sup> | y <sup>*</sup> | y <sup>**++</sup> | y <sup>0</sup> | y <sup>0++</sup> | # |
|---|------------|-----------------|----------------|------------------|------|------------|-----------------|----------------|-------------------|----------------|------------------|---|
| 1 | 114.091340 | 57.549308       |                |                  | I    |            |                 |                |                   |                |                  | 8 |
| 2 | 211.144104 | 106.075690      |                |                  | P    | 849.446495 | 425.226886      | 832.419946     | 416.713611        | 831.435930     | 416.221603       | 7 |
| 3 | 324.228168 | 162.617722      |                |                  | I    | 752.393731 | 376.700504      | 735.367182     | 368.187229        | 734.383166     | 367.695221       | 6 |
| 4 | 453.270761 | 227.139018      | 435.260196     | 218.133736       | E    | 639.309667 | 320.158472      | 622.283118     | 311.645197        | 621.299102     | 311.153189       | 5 |
| 5 | 566.318440 | 283.662858      | 548.307875     | 274.657576       | P    | 510.267074 | 255.637175      | 493.240525     | 247.123900        |                |                  | 4 |
| 6 | 703.377352 | 352.192314      | 685.366787     | 343.187031       | H    | 397.219395 | 199.113335      | 380.192846     | 190.600061        |                |                  | 3 |
| 7 | 816.425031 | 408.716154      | 798.414466     | 399.710871       | P    | 260.160483 | 130.583879      | 243.133934     | 122.070605        |                |                  | 2 |
| 8 |            |                 |                |                  | K    | 147.112804 | 74.060040       | 130.086255     | 65.546765         |                |                  | 1 |

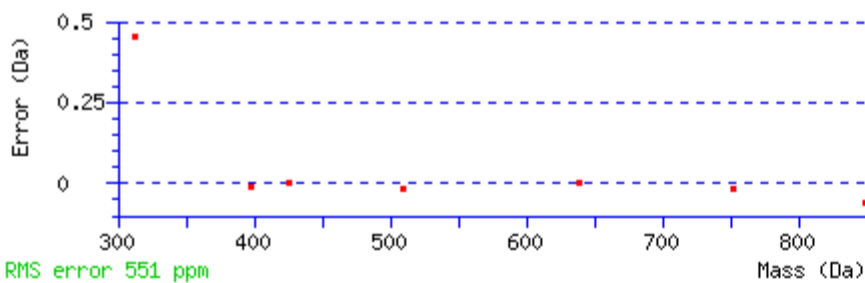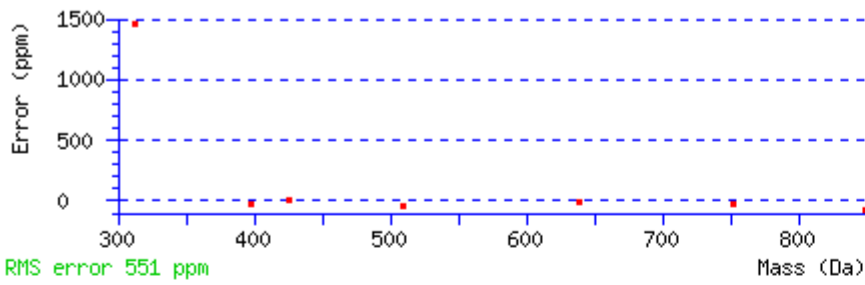

NCBI BLAST search of [IPIEPHPK](#)

(Parameters: blastp, nr protein database, expect=20000, no filter, PAM30)

Other BLAST [web gateways](#)

## All matches to this query

| Score | Mr(calc):  | Delta     | Sequence                  |
|-------|------------|-----------|---------------------------|
| 35.1  | 961.523270 | -0.001562 | <a href="#">IPIEPHPK</a>  |
| 27.6  | 961.523254 | -0.001546 | <a href="#">LPLETAYR</a>  |
| 13.9  | 961.515411 | 0.006297  | <a href="#">TLIEVMPK</a>  |
| 13.7  | 961.519241 | 0.002467  | <a href="#">LGDSSLSRK</a> |
| 11.9  | 961.526642 | -0.004934 | <a href="#">LLIPSTRM</a>  |
| 11.6  | 961.515396 | 0.006312  | <a href="#">MLLSLPEK</a>  |
| 11.1  | 961.526627 | -0.004919 | <a href="#">MSLLNKPK</a>  |
| 8.9   | 961.515381 | 0.006327  | <a href="#">LAMEELIK</a>  |
| 8.0   | 961.530670 | -0.008962 | <a href="#">LTLPLFGAM</a> |
| 5.8   | 961.523270 | -0.001562 | <a href="#">IPIEPHPK</a>  |

# **MATRIX** SCIENCE Mascot Search Results

## Peptide View

MS/MS Fragmentation of **ILIWSGR**

Found in **F162A\_HUMAN**, Protein FAM162A OS=Homo sapiens GN=FAM162A PE=1 SV=2

Match to Query 3929: 843.497468 from(422.756010,2+) rtinseconds(2574) index(31930)

Title: Locus:1.1.1.2132.4

Data file 2011-11-12 - TFD - EP 6-6.mgf

Click mouse within plot area to zoom in by factor of two about that point

Or, Plot from  to  Da

Label all possible matches  Label matches used for scoring

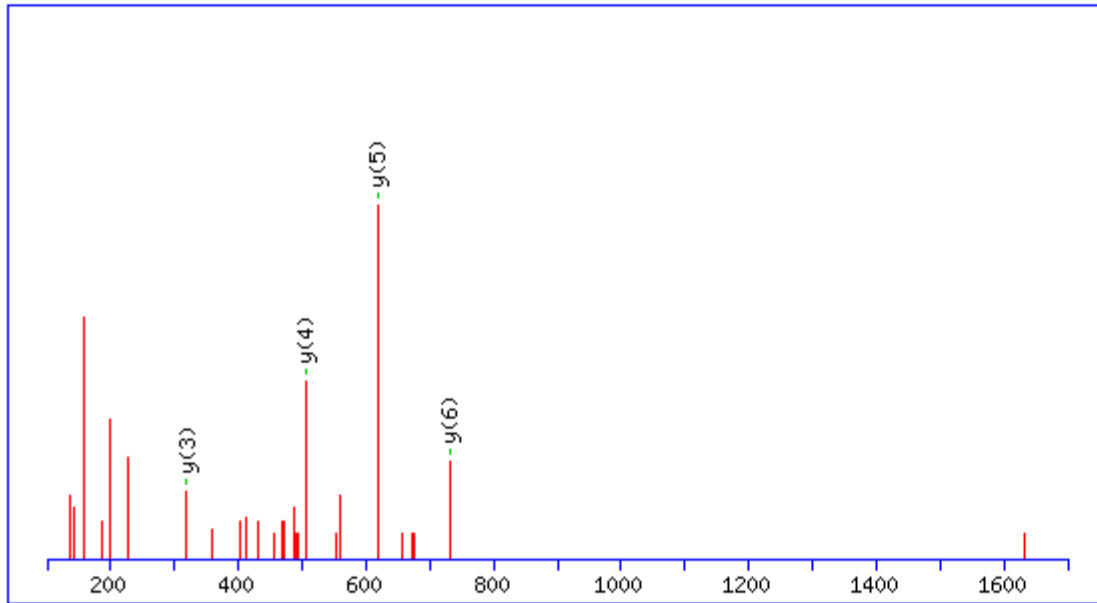

Monoisotopic mass of neutral peptide Mr(calc): 843.496658

Fixed modifications: Propionamide (C) (apply to specified residues or termini only)

Ions Score: 34 Expect: 0.0036

Matches : 4/48 fragment ions using 6 most intense peaks [\(help\)](#)

| # | b          | b <sup>++</sup> | b <sup>0</sup> | b <sup>0++</sup> | Seq. | y                 | y <sup>++</sup> | y <sup>*</sup> | y <sup>*++</sup> | y <sup>0</sup> | y <sup>0++</sup> | # |
|---|------------|-----------------|----------------|------------------|------|-------------------|-----------------|----------------|------------------|----------------|------------------|---|
| 1 | 114.091340 | 57.549308       |                |                  | I    |                   |                 |                |                  |                |                  | 7 |
| 2 | 227.175404 | 114.091340      |                |                  | L    | <b>731.419885</b> | 366.213581      | 714.393336     | 357.700306       | 713.409320     | 357.208298       | 6 |
| 3 | 340.259468 | 170.633372      |                |                  | I    | <b>618.335821</b> | 309.671549      | 601.309272     | 301.158274       | 600.325256     | 300.666266       | 5 |
| 4 | 526.338781 | 263.673029      |                |                  | W    | <b>505.251757</b> | 253.129517      | 488.225208     | 244.616242       | 487.241192     | 244.124234       | 4 |
| 5 | 613.370809 | 307.189043      | 595.360244     | 298.183760       | S    | <b>319.172444</b> | 160.089860      | 302.145895     | 151.576586       | 301.161879     | 151.084578       | 3 |
| 6 | 670.392273 | 335.699775      | 652.381708     | 326.694492       | G    | 232.140416        | 116.573846      | 215.113867     | 108.060572       |                |                  | 2 |
| 7 |            |                 |                |                  | R    | 175.118952        | 88.063114       | 158.092403     | 79.549840        |                |                  | 1 |

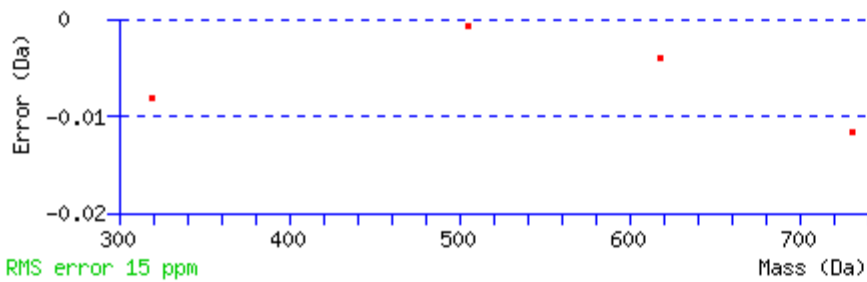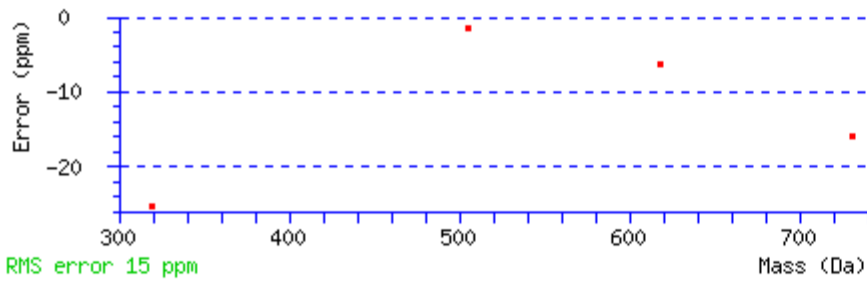

NCBI BLAST search of [ILIWSGR](#)

(Parameters: blastp, nr protein database, expect=20000, no filter, PAM30)

Other BLAST [web gateways](#)

## All matches to this query

| Score | Mr(calc):  | Delta     | Sequence                |
|-------|------------|-----------|-------------------------|
| 33.8  | 843.496658 | 0.000810  | <a href="#">ILIWSGR</a> |
| 15.9  | 843.500015 | -0.002547 | <a href="#">LPIRMAK</a> |
| 6.4   | 843.500015 | -0.002547 | <a href="#">ILRSPMK</a> |
| 6.4   | 843.492630 | 0.004838  | <a href="#">LTDARR</a>  |
| 6.4   | 843.492630 | 0.004838  | <a href="#">LTRGER</a>  |
| 6.4   | 843.496643 | 0.000825  | <a href="#">LWKER</a>   |
| 6.4   | 843.492630 | 0.004838  | <a href="#">IPSRSLR</a> |
| 6.4   | 843.492630 | 0.004838  | <a href="#">LISPSRR</a> |
| 6.4   | 843.492630 | 0.004838  | <a href="#">LPSIRSR</a> |
| 1.6   | 843.496658 | 0.000810  | <a href="#">ILAFPQR</a> |

# **MATRIX** SCIENCE Mascot Search Results

## Peptide View

MS/MS Fragmentation of **EGLLPLR**

Found in **F179A\_HUMAN**, Protein FAM179A OS=Homo sapiens GN=FAM179A PE=2 SV=2

Match to Query 1124: 812.478148 from(407.246350,2+) rtinseconds(1892) index(17508)

Title: Locus:1.1.1.1993.3

Data file 2011-11-14 - TFD - EP 8-6.mgf

Click mouse within plot area to zoom in by factor of two about that point

Or, Plot from  to  Da

Label all possible matches  Label matches used for scoring

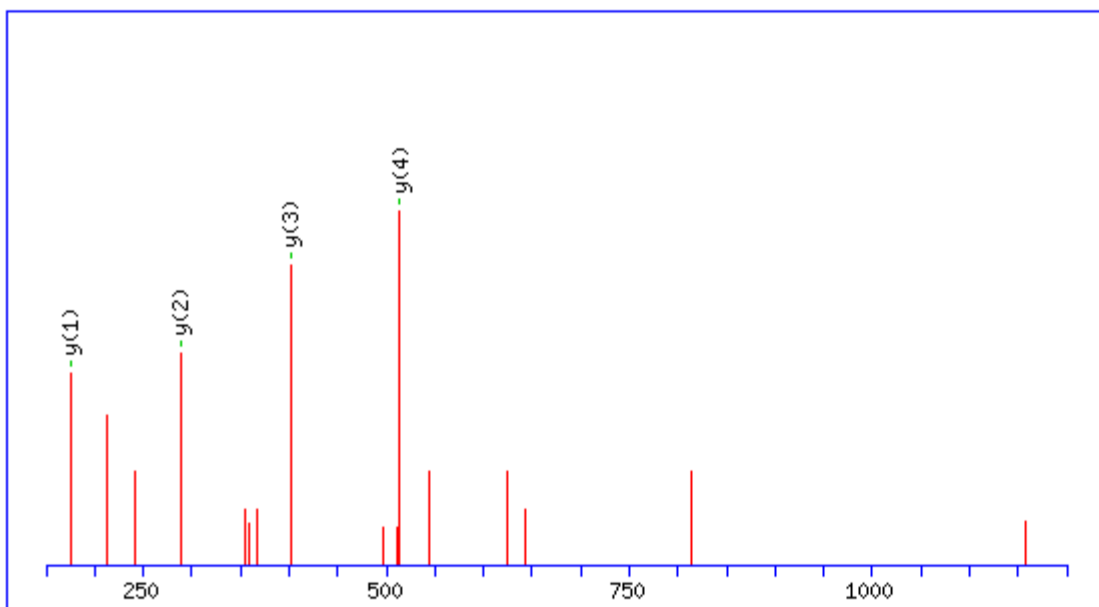

Monoisotopic mass of neutral peptide Mr(calc): 812.475586

Fixed modifications: Propionamide (C) (apply to specified residues or termini only)

Variable modifications:

P5 : Oxidation (P)

Ions Score: 35 Expect: 0.0013

Matches : 4/48 fragment ions using 5 most intense peaks ([help](#))

| # | b          | b <sup>++</sup> | b <sup>0</sup> | b <sup>0++</sup> | Seq. | y                 | y <sup>++</sup> | y <sup>*</sup> | y <sup>*++</sup> | # |
|---|------------|-----------------|----------------|------------------|------|-------------------|-----------------|----------------|------------------|---|
| 1 | 130.049869 | 65.528572       | 112.039304     | 56.523290        | E    |                   |                 |                |                  | 7 |
| 2 | 187.071333 | 94.039305       | 169.060768     | 85.034022        | G    | 684.440287        | 342.723782      | 667.413738     | 334.210507       | 6 |
| 3 | 300.155397 | 150.581336      | 282.144832     | 141.576054       | L    | 627.418823        | 314.213050      | 610.392274     | 305.699775       | 5 |
| 4 | 413.239461 | 207.123369      | 395.228896     | 198.118086       | L    | <b>514.334759</b> | 257.671018      | 497.308210     | 249.157743       | 4 |
| 5 | 526.287140 | 263.647208      | 508.276575     | 254.641926       | P    | <b>401.250695</b> | 201.128985      | 384.224146     | 192.615711       | 3 |
| 6 | 639.371204 | 320.189240      | 621.360639     | 311.183958       | L    | <b>288.203016</b> | 144.605146      | 271.176467     | 136.091871       | 2 |
| 7 |            |                 |                |                  | R    | <b>175.118952</b> | 88.063114       | 158.092403     | 79.549839        | 1 |

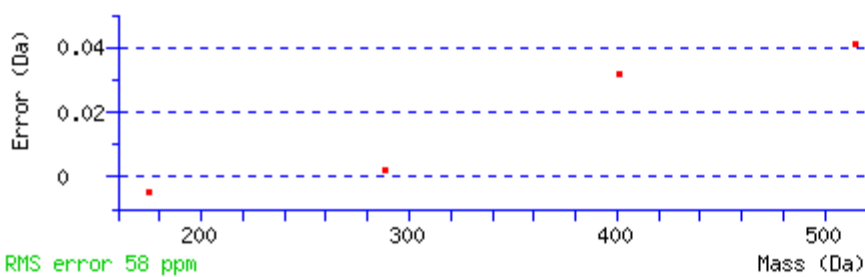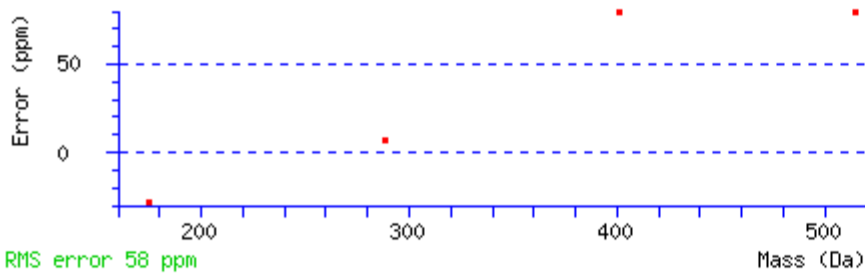

NCBI BLAST search of [EGLLPLR](#)

(Parameters: blastp, nr protein database, expect=20000, no filter, PAM30)

Other BLAST [web gateways](#)

## All matches to this query

| Score | Mr(calc):  | Delta    | Sequence                |
|-------|------------|----------|-------------------------|
| 35.3  | 812.475586 | 0.002562 | <a href="#">EGLLPLR</a> |
| 18.7  | 812.475586 | 0.002562 | <a href="#">APEVLLR</a> |
| 18.7  | 812.475601 | 0.002547 | <a href="#">TLTPPLR</a> |
| 2.5   | 812.475586 | 0.002562 | <a href="#">ILSVEPR</a> |
| 2.5   | 812.475601 | 0.002547 | <a href="#">TVLVPER</a> |
| 1.7   | 812.475601 | 0.002547 | <a href="#">DIVPTLR</a> |
| 1.7   | 812.475601 | 0.002547 | <a href="#">DPVLTLR</a> |
| 1.7   | 812.475586 | 0.002562 | <a href="#">EVLPAIR</a> |
| 1.7   | 812.475586 | 0.002562 | <a href="#">IAPEVLR</a> |
| 1.7   | 812.475601 | 0.002547 | <a href="#">IPSLVPR</a> |

# Mascot Search Results

## Peptide View

MS/MS Fragmentation of **QVEILGGR**

Found in **F186B\_HUMAN**, Protein FAM186B OS=Homo sapiens GN=FAM186B PE=2 SV=2

Match to Query 89453: 870.494428 from(436.254490,2+) rtinseconds(1610) index(504451)

Title: Locus:1.1.1.943.9

Data file C:\Program Files (x86)\Matrix Science\Mascot Daemon\mgf3 TFD - Epitel - R2\mascot\_daemon\_merge.mgf

Click mouse within plot area to zoom in by factor of two about that point

Or, Plot from  to  Da

Label all possible matches  Label matches used for scoring

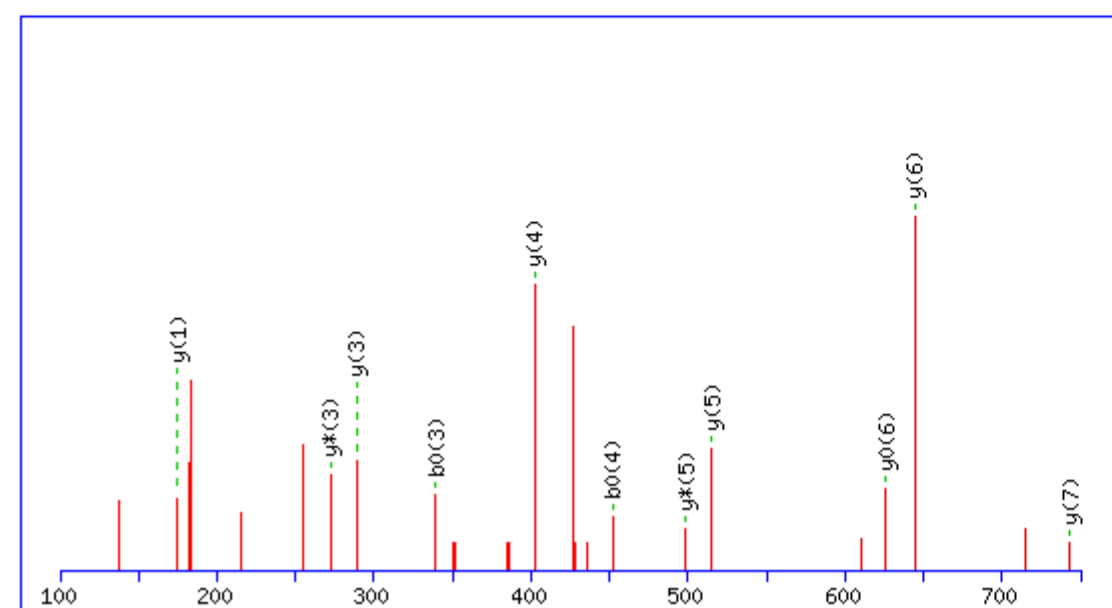

Monoisotopic mass of neutral peptide Mr(calc): 870.492310

Fixed modifications: Carbamidomethyl (C) (apply to specified residues or termini only)

Ions Score: 46 Expect: 0.00046

Matches : 11/70 fragment ions using 17 most intense peaks [\(help\)](#)

| # | b          | b <sup>++</sup> | b*         | b <sup>+++</sup> | b <sup>0</sup>    | b <sup>0++</sup> | Seq. | y                 | y <sup>++</sup> | y*                | y <sup>+++</sup> | y <sup>0</sup>    | y <sup>0++</sup> | # |
|---|------------|-----------------|------------|------------------|-------------------|------------------|------|-------------------|-----------------|-------------------|------------------|-------------------|------------------|---|
| 1 | 129.065854 | 65.036565       | 112.039305 | 56.523291        |                   |                  | Q    |                   |                 |                   |                  |                   |                  | 8 |
| 2 | 228.134268 | 114.570772      | 211.107719 | 106.057498       |                   |                  | V    | <b>743.441015</b> | 372.224146      | 726.414466        | 363.710871       | 725.430450        | 363.218863       | 7 |
| 3 | 357.176861 | 179.092069      | 340.150312 | 170.578794       | <b>339.166296</b> | 170.086786       | E    | <b>644.372601</b> | 322.689939      | 627.346052        | 314.176664       | <b>626.362036</b> | 313.684656       | 6 |
| 4 | 470.260925 | 235.634101      | 453.234376 | 227.120826       | <b>452.250360</b> | 226.628818       | I    | <b>515.330008</b> | 258.168642      | <b>498.303459</b> | 249.655368       |                   |                  | 5 |
| 5 | 583.344989 | 292.176133      | 566.318440 | 283.662858       | 565.334424        | 283.170850       | L    | <b>402.245944</b> | 201.626610      | 385.219395        | 193.113336       |                   |                  | 4 |
| 6 | 640.366453 | 320.686865      | 623.339904 | 312.173590       | 622.355888        | 311.681582       | G    | <b>289.161880</b> | 145.084578      | <b>272.135331</b> | 136.571304       |                   |                  | 3 |
| 7 | 697.387917 | 349.197597      | 680.361368 | 340.684322       | 679.377352        | 340.192314       | G    | 232.140416        | 116.573846      | 215.113867        | 108.060572       |                   |                  | 2 |
| 8 |            |                 |            |                  |                   |                  | R    | <b>175.118952</b> | 88.063114       | 158.092403        | 79.549840        |                   |                  | 1 |

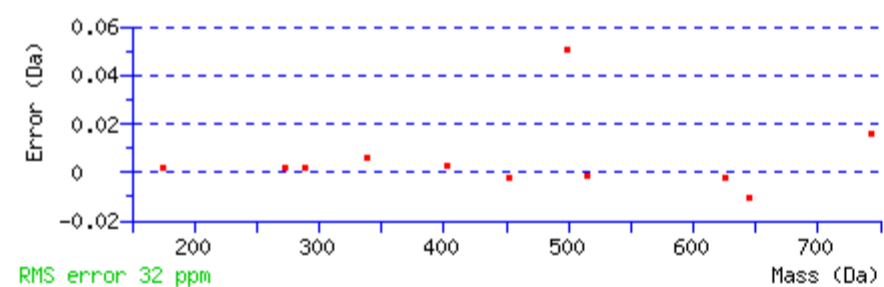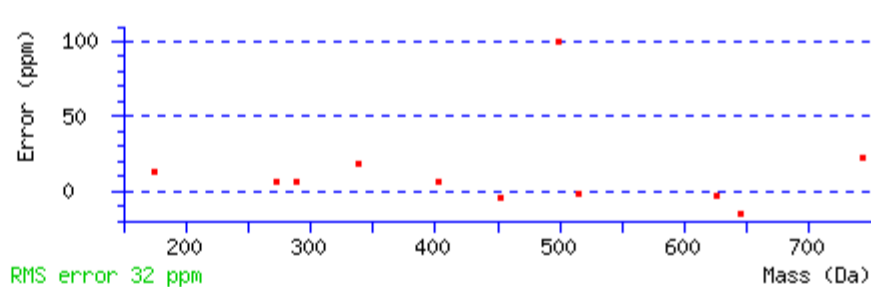

NCBI BLAST search of **QVEILGGR**

(Parameters: blastp, nr protein database, expect=20000, no filter, PAM30)

Other BLAST [web gateways](#)

## All matches to this query

| Score | Mr(calc):  | Delta    | Sequence                  |
|-------|------------|----------|---------------------------|
| 46.2  | 870.492310 | 0.002118 | <a href="#">QVEILGGR</a>  |
| 46.2  | 870.492294 | 0.002134 | <a href="#">QVEILNR</a>   |
| 29.2  | 870.492294 | 0.002134 | <a href="#">QEVLINR</a>   |
| 17.2  | 870.492325 | 0.002103 | <a href="#">AVSVPLGGR</a> |
| 12.0  | 870.492310 | 0.002118 | <a href="#">VKSSTPPR</a>  |
| 9.5   | 870.485764 | 0.008664 | <a href="#">KPSMRPR</a>   |
| 9.5   | 870.492325 | 0.002103 | <a href="#">KTPGVPR</a>   |
| 9.3   | 870.492294 | 0.002134 | <a href="#">NLEQVLR</a>   |
| 9.3   | 870.492294 | 0.002134 | <a href="#">NLEVQLR</a>   |
| 9.2   | 870.492310 | 0.002118 | <a href="#">KSVSTPPR</a>  |



# MASCOT Search Results

## Peptide View

MS/MS Fragmentation of **MASGAANVVGPK**

Found in **FAM3C\_HUMAN**, Protein FAM3C OS=Homo sapiens GN=FAM3C PE=1 SV=1

Match to Query 24460: 1116.558208 from(559.286380,2+) rtinseconds(1062) index(3306)

Title: Locus:1.1.1.1718.33

Data file 2011-11-10 - TFD - EP 4-5.mgf

Click mouse within plot area to zoom in by factor of two about that point

Or, Plot from  to  Da

Label all possible matches  Label matches used for scoring

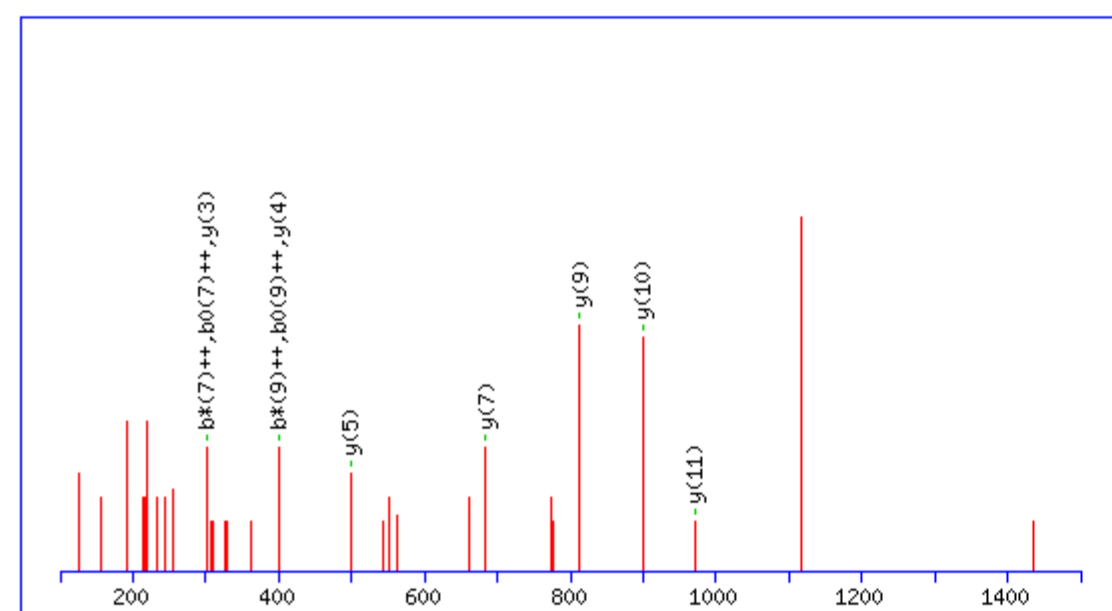

Monoisotopic mass of neutral peptide Mr(calc): 1116.559738

Fixed modifications: Propionamide (C) (apply to specified residues or termini only)

Variable modifications:

M1 : Oxidation (M), with neutral losses 0.000000 (shown in table), 63.998285

Ions Score: 67 Expect: 7.8e-006

Matches : 11/148 fragment ions using 9 most intense peaks [\(help\)](#)

| #  | b          | b <sup>++</sup> | b*         | b <sup>+++</sup> | b <sup>0</sup> | b <sup>0++</sup> | Seq. | y          | y <sup>++</sup> | y*         | y <sup>+++</sup> | y <sup>0</sup> | y <sup>0++</sup> | #  |
|----|------------|-----------------|------------|------------------|----------------|------------------|------|------------|-----------------|------------|------------------|----------------|------------------|----|
| 1  | 148.042676 | 74.524976       |            |                  |                |                  | M    |            |                 |            |                  |                |                  | 12 |
| 2  | 219.079790 | 110.043533      |            |                  |                |                  | A    | 970.531621 | 485.769449      | 953.505072 | 477.256174       | 952.521056     | 476.764166       | 11 |
| 3  | 306.111818 | 153.559547      |            |                  | 288.101253     | 144.554264       | S    | 899.494507 | 450.250892      | 882.467958 | 441.737617       | 881.483942     | 441.245609       | 10 |
| 4  | 363.133282 | 182.070279      |            |                  | 345.122717     | 173.064996       | G    | 812.462479 | 406.734878      | 795.435930 | 398.221603       |                |                  | 9  |
| 5  | 434.170396 | 217.588836      |            |                  | 416.159831     | 208.583553       | A    | 755.441015 | 378.224146      | 738.414466 | 369.710871       |                |                  | 8  |
| 6  | 505.207510 | 253.107393      |            |                  | 487.196945     | 244.102110       | A    | 684.403901 | 342.705589      | 667.377352 | 334.192314       |                |                  | 7  |
| 7  | 619.250437 | 310.128856      | 602.223888 | 301.615582       | 601.239872     | 301.123574       | N    | 613.366787 | 307.187032      | 596.340238 | 298.673757       |                |                  | 6  |
| 8  | 718.318851 | 359.663063      | 701.292302 | 351.149789       | 700.308286     | 350.657781       | V    | 499.323860 | 250.165568      | 482.297311 | 241.652294       |                |                  | 5  |
| 9  | 817.387265 | 409.197270      | 800.360716 | 400.683996       | 799.376700     | 400.191988       | V    | 400.255446 | 200.631361      | 383.228897 | 192.118087       |                |                  | 4  |
| 10 | 874.408729 | 437.708002      | 857.382180 | 429.194728       | 856.398164     | 428.702720       | G    | 301.187032 | 151.097154      | 284.160483 | 142.583880       |                |                  | 3  |
| 11 | 971.461493 | 486.234384      | 954.434944 | 477.721110       | 953.450928     | 477.229102       | P    | 244.165568 | 122.586422      | 227.139019 | 114.073148       |                |                  | 2  |
| 12 |            |                 |            |                  |                |                  | K    | 147.112804 | 74.060040       | 130.086255 | 65.546766        |                |                  | 1  |

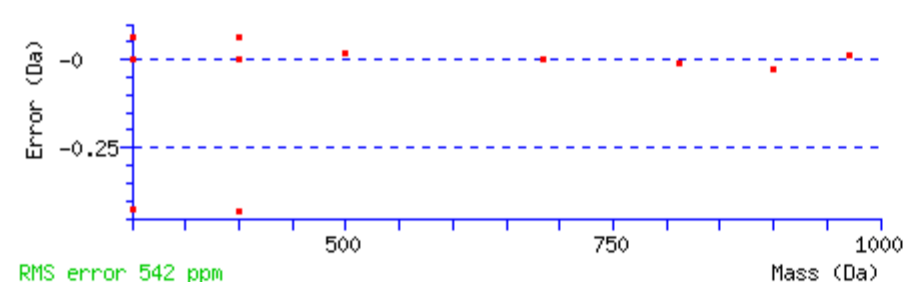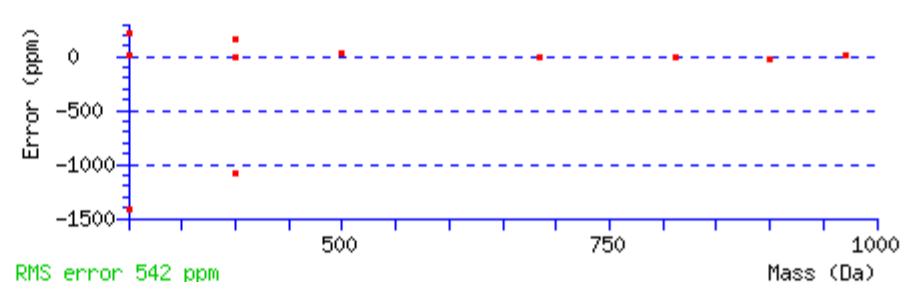

NCBI BLAST search of [MASGAANVVGPK](#)

(Parameters: blastp, nr protein database, expect=20000, no filter, PAM30)

Other BLAST [web gateways](#)

All matches to this query

| Score | Mr(calc):   | Delta     | Sequence                     |
|-------|-------------|-----------|------------------------------|
| 66.6  | 1116.559738 | -0.001530 | <a href="#">MASGAANVVGPK</a> |
| 0.5   | 1116.559753 | -0.001545 | <a href="#">MAAPVVTAPGR</a>  |

Mascot: <http://www.matrixscience.com/>

# MASCOT Search Results

## Peptide View

MS/MS Fragmentation of **EIFTNLPFSEVSADGEKR**  
 Found in **FA45A\_HUMAN**, Protein FAM45A OS=Homo sapiens GN=FAM45A PE=2 SV=1

Match to Query 66235: 2109.032202 from(704.018010,3+) rtinseconds(3123) index(44208)

Title: Locus:1.1.1.2513.29

Data file 2011-11-10 - TFD - EP 4-4.mgf

Click mouse within plot area to zoom in by factor of two about that point

Or, Plot from  to  Da

Label all possible matches  Label matches used for scoring

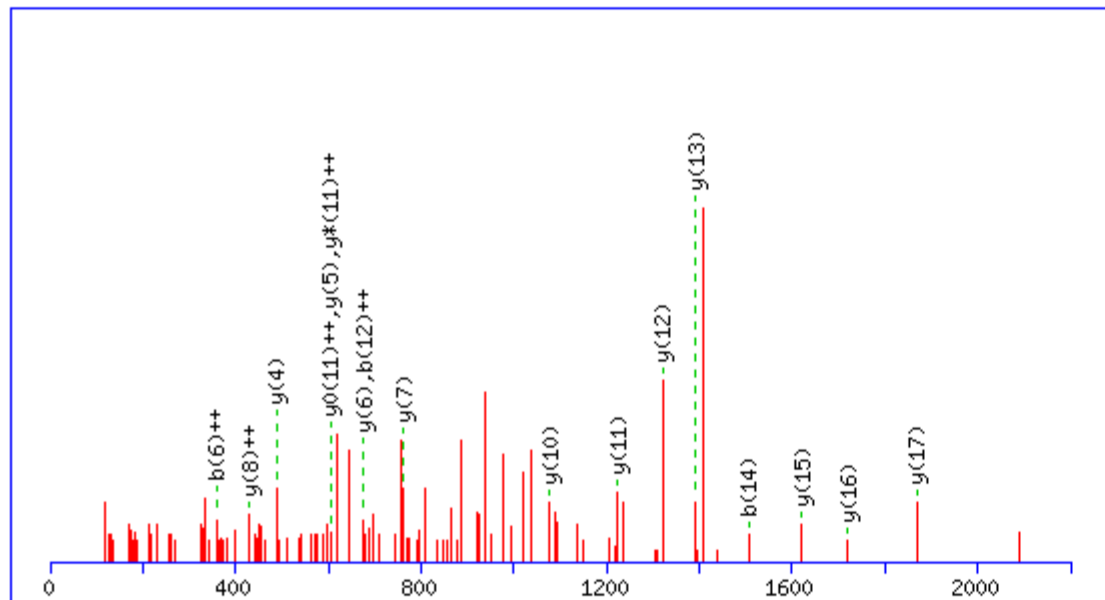

Monoisotopic mass of neutral peptide Mr(calc): 2109.037827

Fixed modifications: Propionamide (C) (apply to specified residues or termini only)

Ions Score: 36 Expect: 0.00056

Matches : 17/204 fragment ions using 45 most intense peaks [\(help\)](#)

| #  | b                  | b <sup>++</sup>   | b <sup>*</sup> | b <sup>++</sup> | b <sup>0</sup> | b <sup>0++</sup> | Seq. | y                  | y <sup>++</sup>   | y <sup>*</sup> | y <sup>++</sup>   | y <sup>0</sup> | y <sup>0++</sup>  | #  |
|----|--------------------|-------------------|----------------|-----------------|----------------|------------------|------|--------------------|-------------------|----------------|-------------------|----------------|-------------------|----|
| 1  | 130.049869         | 65.528572         |                |                 | 112.039304     | 56.523290        | E    |                    |                   |                |                   |                |                   | 19 |
| 2  | 243.133933         | 122.070605        |                |                 | 225.123368     | 113.065322       | I    | 1981.002532        | 991.004904        | 1963.975983    | 982.491630        | 1962.991967    | 981.999622        | 18 |
| 3  | 390.202347         | 195.604811        |                |                 | 372.191782     | 186.599529       | F    | <b>1867.918468</b> | 934.462872        | 1850.891919    | 925.949598        | 1849.907903    | 925.457590        | 17 |
| 4  | 491.250026         | 246.128651        |                |                 | 473.239461     | 237.123369       | T    | <b>1720.850054</b> | 860.928665        | 1703.823505    | 852.415391        | 1702.839489    | 851.923383        | 16 |
| 5  | 605.292953         | 303.150115        | 588.266404     | 294.636840      | 587.282388     | 294.144832       | N    | <b>1619.802375</b> | 810.404826        | 1602.775826    | 801.891551        | 1601.791810    | 801.399543        | 15 |
| 6  | 718.377017         | <b>359.692147</b> | 701.350468     | 351.178872      | 700.366452     | 350.686864       | L    | 1505.759448        | 753.383362        | 1488.732899    | 744.870088        | 1487.748883    | 744.378080        | 14 |
| 7  | 789.414131         | 395.210704        | 772.387582     | 386.697429      | 771.403566     | 386.205421       | A    | <b>1392.675384</b> | 696.841330        | 1375.648835    | 688.328056        | 1374.664819    | 687.836048        | 13 |
| 8  | 886.466895         | 443.737086        | 869.440346     | 435.223811      | 868.456330     | 434.731803       | P    | <b>1321.638270</b> | 661.322773        | 1304.611721    | 652.809499        | 1303.627705    | 652.317491        | 12 |
| 9  | 1033.535309        | 517.271293        | 1016.508760    | 508.758018      | 1015.524744    | 508.266010       | F    | <b>1224.585506</b> | 612.796391        | 1207.558957    | <b>604.283117</b> | 1206.574941    | <b>603.791109</b> | 11 |
| 10 | 1120.567337        | 560.787307        | 1103.540788    | 552.274032      | 1102.556772    | 551.782024       | S    | <b>1077.517092</b> | 539.262184        | 1060.490543    | 530.748910        | 1059.506527    | 530.256902        | 10 |
| 11 | 1249.609930        | 625.308603        | 1232.583381    | 616.795329      | 1231.599365    | 616.303321       | E    | 990.485064         | 495.746170        | 973.458515     | 487.232896        | 972.474499     | 486.740888        | 9  |
| 12 | 1348.678344        | <b>674.842810</b> | 1331.651795    | 666.329536      | 1330.667779    | 665.837528       | V    | 861.442471         | <b>431.224874</b> | 844.415922     | 422.711599        | 843.431906     | 422.219591        | 8  |
| 13 | 1435.710372        | 718.358824        | 1418.683823    | 709.845550      | 1417.699807    | 709.353542       | S    | <b>762.374057</b>  | 381.690667        | 745.347508     | 373.177392        | 744.363492     | 372.685384        | 7  |
| 14 | <b>1506.747486</b> | 753.877381        | 1489.720937    | 745.364107      | 1488.736921    | 744.872099       | A    | <b>675.342029</b>  | 338.174652        | 658.315480     | 329.661378        | 657.331464     | 329.169370        | 6  |
| 15 | 1621.774429        | 811.390853        | 1604.747880    | 802.877578      | 1603.763864    | 802.385570       | D    | <b>604.304915</b>  | 302.656095        | 587.278366     | 294.142821        | 586.294350     | 293.650813        | 5  |
| 16 | 1678.795893        | 839.901585        | 1661.769344    | 831.388310      | 1660.785328    | 830.896302       | G    | <b>489.277972</b>  | 245.142624        | 472.251423     | 236.629349        | 471.267407     | 236.137341        | 4  |
| 17 | 1807.838486        | 904.422881        | 1790.811937    | 895.909607      | 1789.827921    | 895.417599       | E    | 432.256508         | 216.631892        | 415.229959     | 208.118617        | 414.245943     | 207.626609        | 3  |
| 18 | 1935.933449        | 968.470363        | 1918.906900    | 959.957088      | 1917.922884    | 959.465080       | K    | 303.213915         | 152.110595        | 286.187366     | 143.597321        |                |                   | 2  |
| 19 |                    |                   |                |                 |                |                  | R    | 175.118952         | 88.063114         | 158.092403     | 79.549839         |                |                   | 1  |

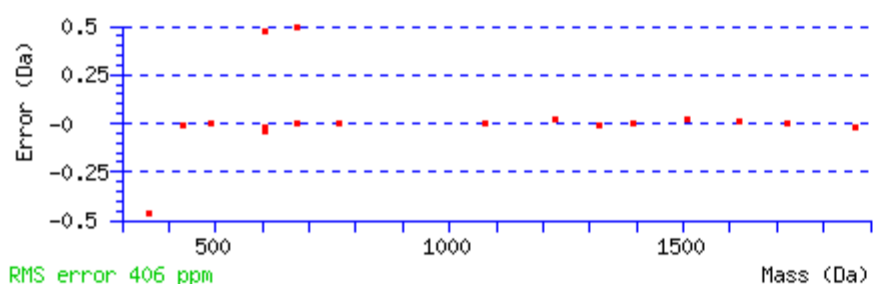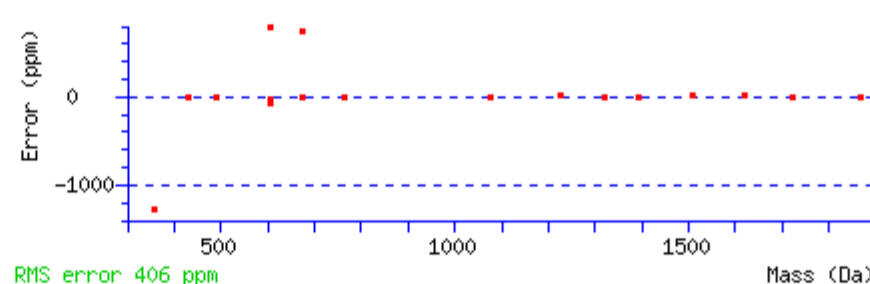

NCBI BLAST search of **EIFTNLPFSEVSADGEKR**

(Parameters: blastp, nr protein database, expect=20000, no filter, PAM30)

Other BLAST [web gateways](#)

### All matches to this query

| Score | Mr(calc):   | Delta     | Sequence                           |
|-------|-------------|-----------|------------------------------------|
| 36.1  | 2109.037827 | -0.005625 | <a href="#">EIFTNLPFSEVSADGEKR</a> |
| 1.4   | 2109.029984 | 0.002218  | <a href="#">TPPECVLTPPPSADDNLK</a> |

# Mascot Search Results

## Peptide View

### MS/MS Fragmentation of IEKELLQK

Found in **FA81A\_HUMAN**, Protein FAM81A OS=Homo sapiens GN=FAM81A PE=2 SV=3

Match to Query 11407: 999.599108 from(500.806830,2+) rtinseconds(1596) index(4000)

Title: Locus:1.1.1.2264.12

Data file 2011-11-13 - TFD - EP 7-8.mgf

Click mouse within plot area to zoom in by factor of two about that point

Or, Plot from  to  Da

Label all possible matches  Label matches used for scoring

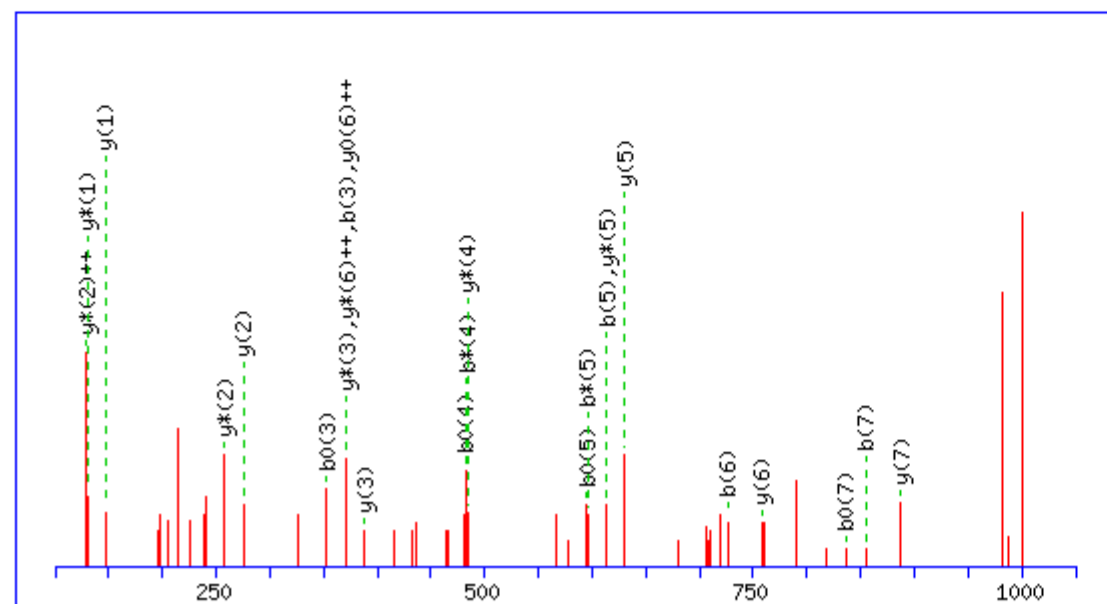

Monoisotopic mass of neutral peptide Mr(calc): 999.596405

Fixed modifications: Propionamide (C) (apply to specified residues or termini only)

Ions Score: 38 Expect: 0.0011

Matches : 24/70 fragment ions using 33 most intense peaks [\(help\)](#)

| # | b                 | b <sup>++</sup> | b*                | b <sup>+++</sup> | b <sup>0</sup>    | b <sup>0++</sup> | Seq. | y                 | y <sup>++</sup> | y*                | y <sup>+++</sup>  | y <sup>0</sup> | y <sup>0++</sup>  | # |
|---|-------------------|-----------------|-------------------|------------------|-------------------|------------------|------|-------------------|-----------------|-------------------|-------------------|----------------|-------------------|---|
| 1 | 114.091340        | 57.549308       |                   |                  |                   |                  | I    |                   |                 |                   |                   |                |                   | 8 |
| 2 | 243.133933        | 122.070605      |                   |                  | 225.123368        | 113.065322       | E    | <b>887.519659</b> | 444.263468      | 870.493110        | 435.750193        | 869.509094     | 435.258185        | 7 |
| 3 | <b>371.228896</b> | 186.118086      | 354.202347        | 177.604812       | <b>353.218331</b> | 177.112804       | K    | <b>758.477066</b> | 379.742171      | 741.450517        | <b>371.228897</b> | 740.466501     | <b>370.736889</b> | 6 |
| 4 | 500.271489        | 250.639383      | <b>483.244940</b> | 242.126108       | <b>482.260924</b> | 241.634100       | E    | <b>630.382103</b> | 315.694690      | <b>613.355554</b> | 307.181415        | 612.371538     | 306.689407        | 5 |
| 5 | <b>613.355553</b> | 307.181415      | <b>596.329004</b> | 298.668140       | <b>595.344988</b> | 298.176132       | L    | 501.339510        | 251.173393      | <b>484.312961</b> | 242.660119        |                |                   | 4 |
| 6 | <b>726.439617</b> | 363.723447      | 709.413068        | 355.210172       | 708.429052        | 354.718164       | L    | <b>388.255446</b> | 194.631361      | <b>371.228897</b> | 186.118087        |                |                   | 3 |
| 7 | <b>854.498195</b> | 427.752736      | 837.471646        | 419.239461       | <b>836.487630</b> | 418.747453       | Q    | <b>275.171382</b> | 138.089329      | <b>258.144833</b> | <b>129.576055</b> |                |                   | 2 |
| 8 |                   |                 |                   |                  |                   |                  | K    | <b>147.112804</b> | 74.060040       | <b>130.086255</b> | 65.546765         |                |                   | 1 |

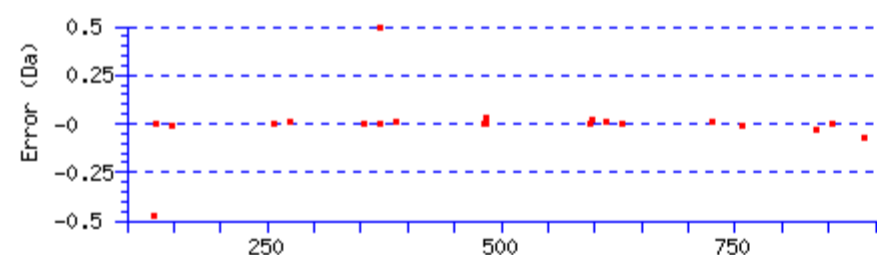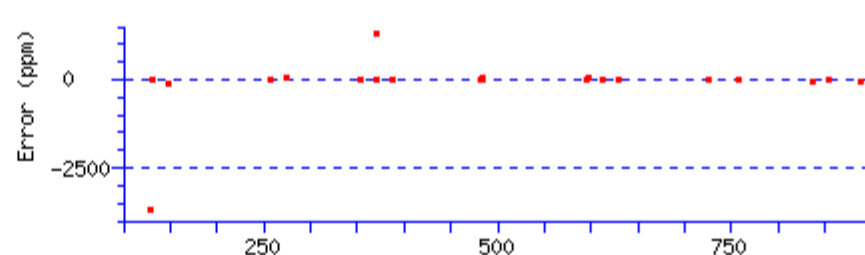

### NCBI BLAST search of IEKELLQK

(Parameters: blastp, nr protein database, expect=20000, no filter, PAM30)

Other BLAST [web gateways](#)

### All matches to this query

| Score | Mr(calc):  | Delta     | Sequence                  |
|-------|------------|-----------|---------------------------|
| 42.6  | 999.596405 | 0.002703  | <a href="#">EQLELLKK</a>  |
| 42.5  | 999.596405 | 0.002703  | <a href="#">QLELEIKK</a>  |
| 38.4  | 999.596405 | 0.002703  | <a href="#">IEKELLQK</a>  |
| 33.2  | 999.596405 | 0.002703  | <a href="#">ELKELIQK</a>  |
| 25.1  | 999.596405 | 0.002703  | <a href="#">LQELEKIK</a>  |
| 21.1  | 999.596405 | 0.002703  | <a href="#">LQELKIEK</a>  |
| 20.8  | 999.607651 | -0.008543 | <a href="#">LLRTELQK</a>  |
| 17.6  | 999.596405 | 0.002703  | <a href="#">ELQILKEK</a>  |
| 17.4  | 999.596405 | 0.002703  | <a href="#">EEIAVALKK</a> |
| 15.9  | 999.596405 | 0.002703  | <a href="#">EKEILQIK</a>  |

# {MATRIX} SCIENCE Mascot Search Results

## Peptide View

MS/MS Fragmentation of **GPLLEEALTK**

Found in **FA98B\_HUMAN**, Protein FAM98B OS=Homo sapiens GN=FAM98B PE=1 SV=1

Match to Query 518483: 1197.651328 from(599.832940,2+) rtinseconds(2223) index(759646)

Title: Locus:1.1.1.1192.27

Data file C:\Program Files (x86)\Matrix Science\Mascot Daemon\mgf3 TFD - Epitel - R2\mascot\_daemon\_merge.mgf

Click mouse within plot area to zoom in by factor of two about that point

Or, Plot from  to  Da

Label all possible matches  Label matches used for scoring

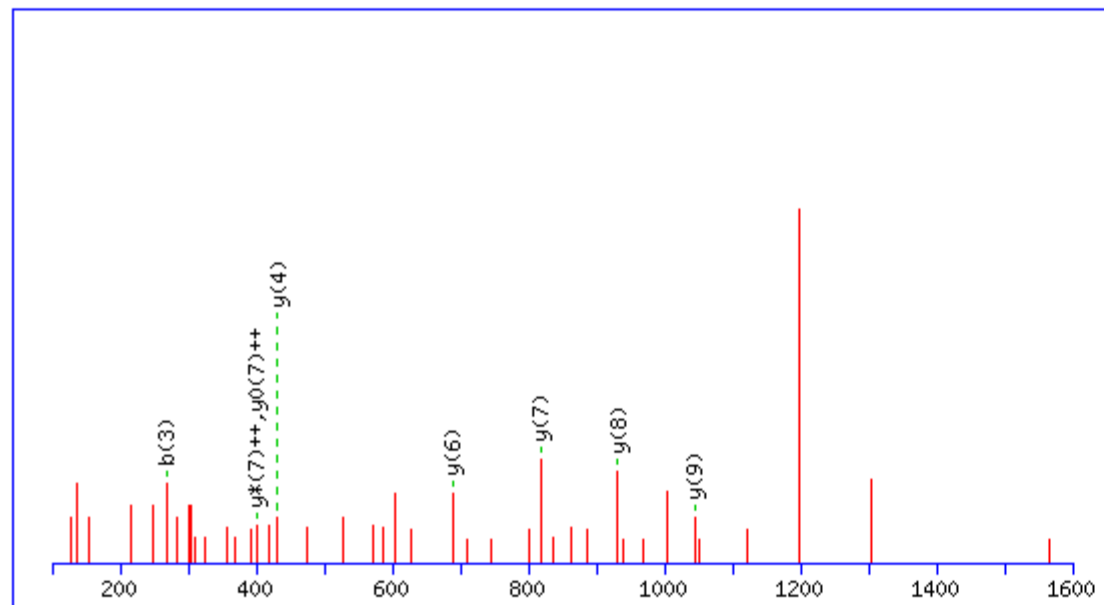

Monoisotopic mass of neutral peptide Mr(calc): 1197.660477

Fixed modifications: Carbamidomethyl (C) (apply to specified residues or termini only)

Ions Score: 31 Expect: 0.011

Matches : 8/98 fragment ions using 10 most intense peaks ([help](#))

| #  | b                 | b <sup>++</sup> | b <sup>*</sup> | b <sup>*++</sup> | b <sup>0</sup> | b <sup>0++</sup> | Seq. | y                  | y <sup>++</sup> | y <sup>*</sup> | y <sup>*++</sup>  | y <sup>0</sup> | y <sup>0++</sup>  | #  |
|----|-------------------|-----------------|----------------|------------------|----------------|------------------|------|--------------------|-----------------|----------------|-------------------|----------------|-------------------|----|
| 1  | 58.028740         | 29.518008       |                |                  |                |                  | G    |                    |                 |                |                   |                |                   | 11 |
| 2  | 155.081504        | 78.044390       |                |                  |                |                  | P    | 1141.646317        | 571.326797      | 1124.619768    | 562.813522        | 1123.635752    | 562.321514        | 10 |
| 3  | <b>268.165568</b> | 134.586422      |                |                  |                |                  | L    | <b>1044.593553</b> | 522.800415      | 1027.567004    | 514.287140        | 1026.582988    | 513.795132        | 9  |
| 4  | 381.249632        | 191.128454      |                |                  |                |                  | L    | <b>931.509489</b>  | 466.258383      | 914.482940     | 457.745108        | 913.498924     | 457.253100        | 8  |
| 5  | 510.292225        | 255.649751      |                |                  | 492.281660     | 246.644468       | E    | <b>818.425425</b>  | 409.716351      | 801.398876     | <b>401.203076</b> | 800.414860     | <b>400.711068</b> | 7  |
| 6  | 639.334818        | 320.171047      |                |                  | 621.324253     | 311.165765       | E    | <b>689.382832</b>  | 345.195054      | 672.356283     | 336.681780        | 671.372267     | 336.189772        | 6  |
| 7  | 767.393396        | 384.200336      | 750.366847     | 375.687062       | 749.382831     | 375.195054       | Q    | 560.340239         | 280.673758      | 543.313690     | 272.160483        | 542.329674     | 271.668475        | 5  |
| 8  | 838.430510        | 419.718893      | 821.403961     | 411.205619       | 820.419945     | 410.713611       | A    | <b>432.281661</b>  | 216.644468      | 415.255112     | 208.131194        | 414.271096     | 207.639186        | 4  |
| 9  | 951.514574        | 476.260925      | 934.488025     | 467.747651       | 933.504009     | 467.255643       | L    | 361.244547         | 181.125912      | 344.217998     | 172.612637        | 343.233982     | 172.120629        | 3  |
| 10 | 1052.562253       | 526.784765      | 1035.535704    | 518.271490       | 1034.551688    | 517.779482       | T    | 248.160483         | 124.583879      | 231.133934     | 116.070605        | 230.149918     | 115.578597        | 2  |
| 11 |                   |                 |                |                  |                |                  | K    | 147.112804         | 74.060040       | 130.086255     | 65.546765         |                |                   | 1  |

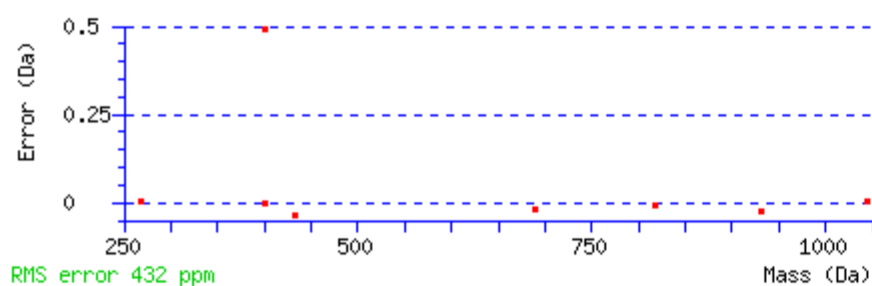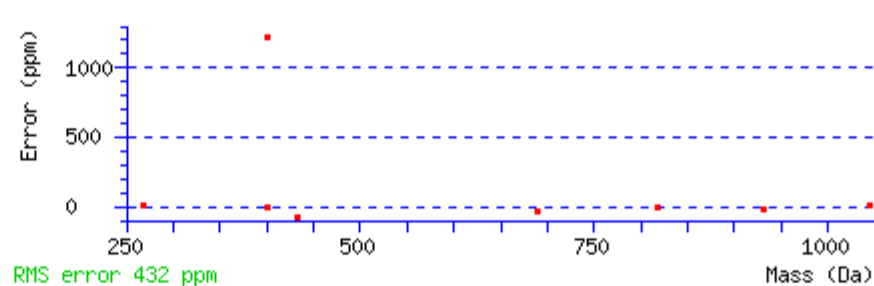

NCBI BLAST search of [GPLLEEALTK](#)

(Parameters: blastp, nr protein database, expect=20000, no filter, PAM30)

Other BLAST [web gateways](#)

All matches to this query

| Score | Mr(calc):   | Delta     | Sequence                   |
|-------|-------------|-----------|----------------------------|
| 31.1  | 1197.660477 | -0.009149 | <a href="#">GPLLEEALTK</a> |

Mascot: <http://www.matrixscience.com/>

**MATRIX SCIENCE Mascot Search Results**

**Peptide View**

MS/MS Fragmentation of **ALCGGDGAAALR**

Found in **FA98C\_HUMAN**, Protein FAM98C OS=Homo sapiens GN=FAM98C PE=2 SV=1

Match to Query 432625: 1130.551948 from(566.283250,2+) rtinseconds(1552) index(421300)

Title: Locus:1.1.1.931.25

Data file C:\Program Files (x86)\Matrix Science\Mascot Daemon\mgf3 TFD - Epitel - R2\mascot\_daemon\_merge.mgf

Click mouse within plot area to zoom in by factor of two about that point

Or, Plot from  to  Da

Label all possible matches  Label matches used for scoring

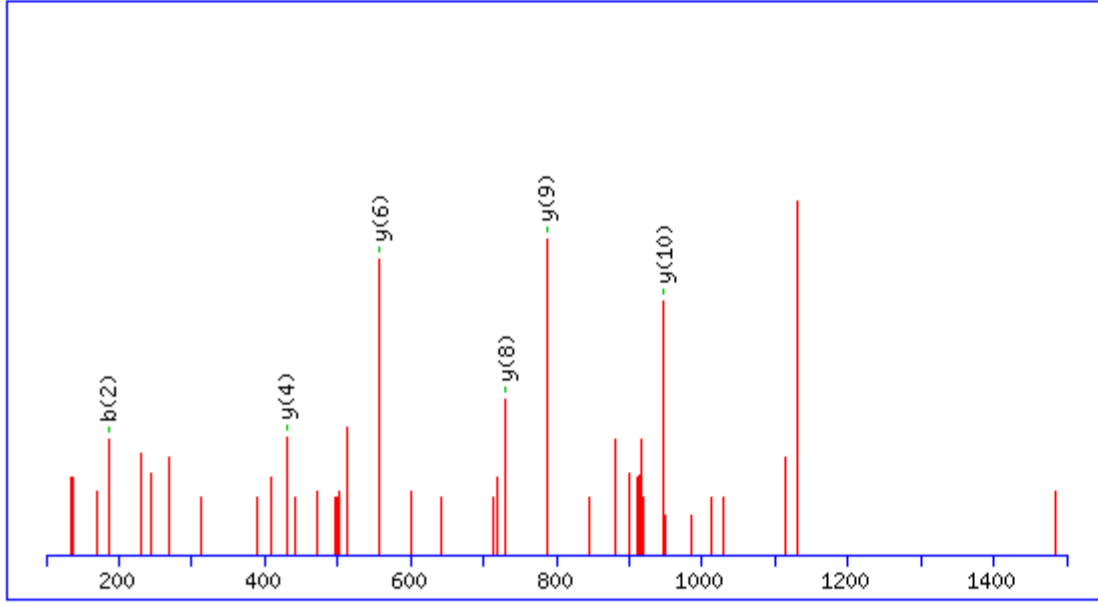

Monoisotopic mass of neutral peptide Mr(calc): 1130.550232

Fixed modifications: Carbamidomethyl (C) (apply to specified residues or termini only)

Ions Score: 32 Expect: 0.0027

Matches: 6/88 fragment ions using 10 most intense peaks [\(help\)](#)

| #  | b          | b <sup>++</sup> | b <sup>0</sup> | b <sup>0++</sup> | Seq. | y           | y <sup>++</sup> | y <sup>*</sup> | y <sup>*++</sup> | y <sup>0</sup> | y <sup>0++</sup> | #  |
|----|------------|-----------------|----------------|------------------|------|-------------|-----------------|----------------|------------------|----------------|------------------|----|
| 1  | 72.044390  | 36.525833       |                |                  | A    |             |                 |                |                  |                |                  | 12 |
| 2  | 185.128454 | 93.067865       |                |                  | L    | 1060.520406 | 530.763841      | 1043.493857    | 522.250567       | 1042.509841    | 521.758559       | 11 |
| 3  | 345.159103 | 173.083190      |                |                  | C    | 947.436342  | 474.221809      | 930.409793     | 465.708535       | 929.425777     | 465.216527       | 10 |
| 4  | 402.180567 | 201.593921      |                |                  | G    | 787.405693  | 394.206485      | 770.379144     | 385.693210       | 769.395128     | 385.201202       | 9  |
| 5  | 459.202031 | 230.104653      |                |                  | G    | 730.384229  | 365.695753      | 713.357680     | 357.182478       | 712.373664     | 356.690470       | 8  |
| 6  | 574.228974 | 287.618125      | 556.218409     | 278.612843       | D    | 673.362765  | 337.185021      | 656.336216     | 328.671746       | 655.352200     | 328.179738       | 7  |
| 7  | 631.250438 | 316.128857      | 613.239873     | 307.123575       | G    | 558.335822  | 279.671549      | 541.309273     | 271.158275       |                |                  | 6  |
| 8  | 702.287552 | 351.647414      | 684.276987     | 342.642132       | A    | 501.314358  | 251.160817      | 484.287809     | 242.647542       |                |                  | 5  |
| 9  | 773.324666 | 387.165971      | 755.314101     | 378.160688       | A    | 430.277244  | 215.642260      | 413.250695     | 207.128986       |                |                  | 4  |
| 10 | 844.361780 | 422.684528      | 826.351215     | 413.679245       | A    | 359.240130  | 180.123703      | 342.213581     | 171.610429       |                |                  | 3  |
| 11 | 957.445844 | 479.226560      | 939.435279     | 470.221277       | L    | 288.203016  | 144.605146      | 271.176467     | 136.091872       |                |                  | 2  |
| 12 |            |                 |                |                  | R    | 175.118952  | 88.063114       | 158.092403     | 79.549840        |                |                  | 1  |

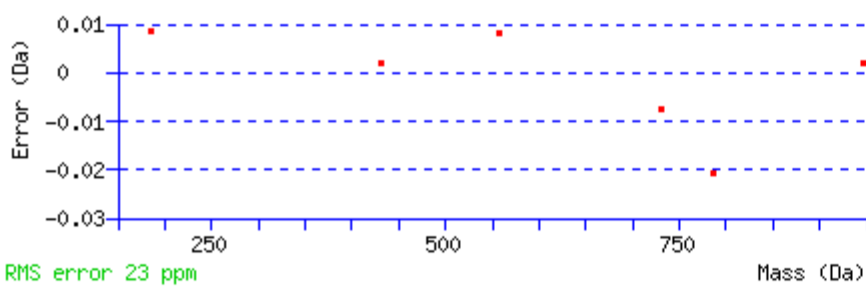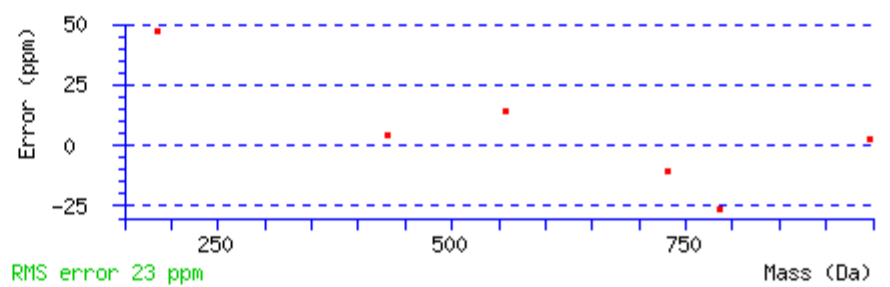

NCBI BLAST search of [ALCGGDGAAALR](#)

(Parameters: blastp, nr protein database, expect=20000, no filter, PAM30)

Other BLAST [web gateways](#)

**All matches to this query**

| Score | Mr(calc):   | Delta     | Sequence                      |
|-------|-------------|-----------|-------------------------------|
| 31.6  | 1130.550232 | 0.001716  | <a href="#">ALCGGDGAAALR</a>  |
| 4.0   | 1130.546387 | 0.005561  | <a href="#">MAAKQPPPLM</a>    |
| 4.0   | 1130.546387 | 0.005561  | <a href="#">MAAKQPPPLM</a>    |
| 4.0   | 1130.546387 | 0.005561  | <a href="#">MAAKQPPPLM</a>    |
| 3.7   | 1130.550217 | 0.001731  | <a href="#">MAAAAAAGSGTPR</a> |
| 2.6   | 1130.546387 | 0.005561  | <a href="#">MAAKQPPPLM</a>    |
| 1.8   | 1130.556763 | -0.004815 | <a href="#">SDAAGDIVDIR</a>   |

Mascot: <http://www.matrixscience.com/>

# MASCOT SCIENCE Mascot Search Results

## Peptide View

MS/MS Fragmentation of **TDLIELLAR**

Found in **FRYL\_HUMAN**, Protein furry homolog-like OS=Homo sapiens GN=FRYL PE=1 SV=2

Match to Query 18314: 1042.605528 from(522.310040,2+) rtinseconds(3619) index(51963)

Title: Locus:1.1.1.2791.5

Data file 2011-11-10 - TFD - EP 3-1.mgf

Click mouse within plot area to zoom in by factor of two about that point

Or, Plot from  to  Da

Label all possible matches  Label matches used for scoring

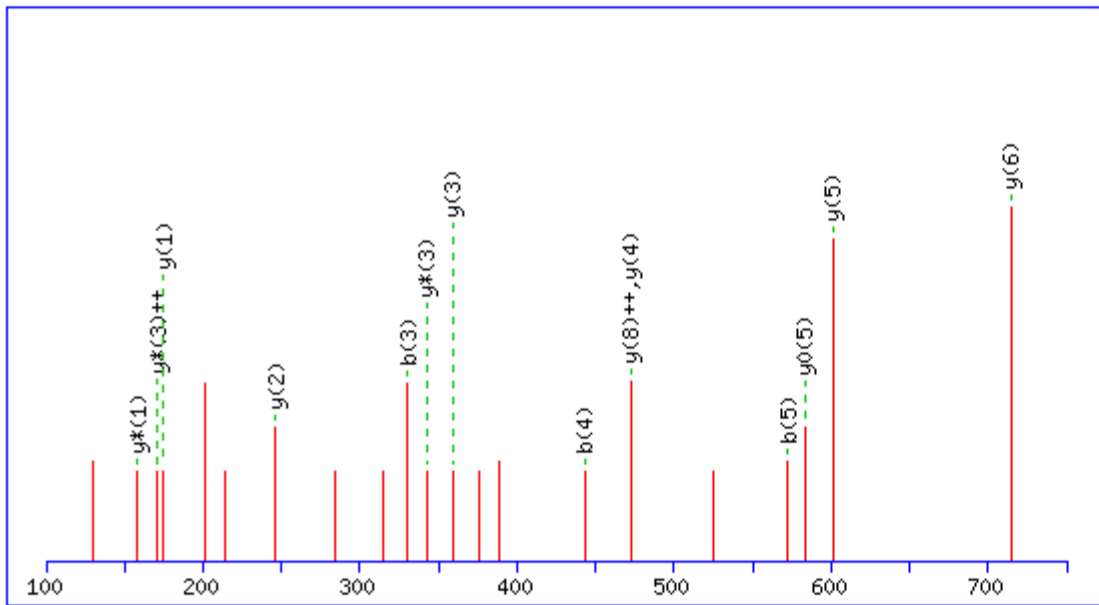

Monoisotopic mass of neutral peptide  $M_r(\text{calc})$ : 1042.602234

Fixed modifications: Propionamide (C) (apply to specified residues or termini only)

Ions Score: 44 Expect: 0.00051

Matches : 14/72 fragment ions using 20 most intense peaks [\(help\)](#)

| # | b          | b <sup>++</sup> | b <sup>0</sup> | b <sup>0++</sup> | Seq. | y          | y <sup>++</sup> | y <sup>*</sup> | y <sup>+++</sup> | y <sup>0</sup> | y <sup>0++</sup> | # |
|---|------------|-----------------|----------------|------------------|------|------------|-----------------|----------------|------------------|----------------|------------------|---|
| 1 | 102.054955 | 51.531116       | 84.044390      | 42.525833        | T    |            |                 |                |                  |                |                  | 9 |
| 2 | 217.081898 | 109.044587      | 199.071333     | 100.039304       | D    | 942.561858 | 471.784567      | 925.535309     | 463.271293       | 924.551293     | 462.779285       | 8 |
| 3 | 330.165962 | 165.586619      | 312.155397     | 156.581336       | L    | 827.534915 | 414.271096      | 810.508366     | 405.757821       | 809.524350     | 405.265813       | 7 |
| 4 | 443.250026 | 222.128651      | 425.239461     | 213.123369       | I    | 714.450851 | 357.729064      | 697.424302     | 349.215789       | 696.440286     | 348.723781       | 6 |
| 5 | 572.292619 | 286.649948      | 554.282054     | 277.644665       | E    | 601.366787 | 301.187032      | 584.340238     | 292.673757       | 583.356222     | 292.181749       | 5 |
| 6 | 685.376683 | 343.191980      | 667.366118     | 334.186697       | L    | 472.324194 | 236.665735      | 455.297645     | 228.152460       |                |                  | 4 |
| 7 | 798.460747 | 399.734012      | 780.450182     | 390.728729       | L    | 359.240130 | 180.123703      | 342.213581     | 171.610428       |                |                  | 3 |
| 8 | 869.497861 | 435.252569      | 851.487296     | 426.247286       | A    | 246.156066 | 123.581671      | 229.129517     | 115.068396       |                |                  | 2 |
| 9 |            |                 |                |                  | R    | 175.118952 | 88.063114       | 158.092403     | 79.549839        |                |                  | 1 |

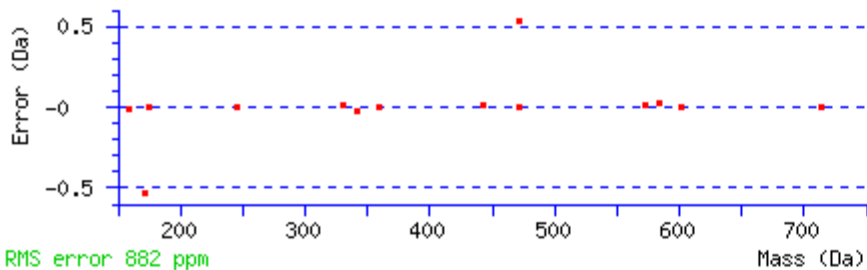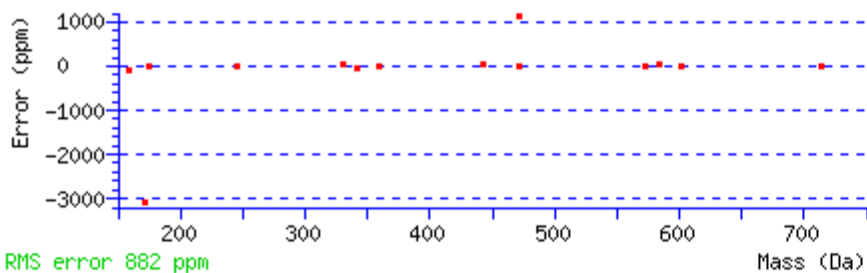

NCBI BLAST search of **TDLIELLAR**

(Parameters: blastp, nr protein database, expect=20000, no filter, PAM30)

Other BLAST [web gateways](#)

## All matches to this query

| Score | $M_r(\text{calc})$ : | Delta     | Sequence                    |
|-------|----------------------|-----------|-----------------------------|
| 44.0  | 1042.602234          | 0.003294  | <a href="#">TDLIELLAR</a>   |
| 10.8  | 1042.613464          | -0.007936 | <a href="#">ASEALKVVAR</a>  |
| 7.5   | 1042.595703          | 0.009825  | <a href="#">MPTLKANIR</a>   |
| 6.4   | 1042.613495          | -0.007967 | <a href="#">VQGVSLTALR</a>  |
| 6.0   | 1042.613480          | -0.007952 | <a href="#">ATKPAVTLAR</a>  |
| 4.0   | 1042.606934          | -0.001406 | <a href="#">LRLQCLAR</a>    |
| 2.9   | 1042.603577          | 0.001951  | <a href="#">TLWARLQR</a>    |
| 2.4   | 1042.613480          | -0.007952 | <a href="#">VVDSIRNLK</a>   |
| 1.8   | 1042.602249          | 0.003279  | <a href="#">VTASLLGAPSK</a> |
| 1.3   | 1042.613510          | -0.007982 | <a href="#">TGGVPIRTVK</a>  |

# MASCOT Search Results

## Peptide View

MS/MS Fragmentation of **AYAQQLTEWAR**

Found in **PACN2\_HUMAN**, Protein kinase C and casein kinase substrate in neurons protein 2 OS=Homo sapiens GN=PACSIN2 PE=1 SV=2

Match to Query 35712: 1335.658568 from(668.836560,2+) rtinseconds(2656) index(35783)

Title: Locus:1.1.1.2430.38

Data file 2011-11-10 - TFD - EP 3-3.mgf

Click mouse within plot area to zoom in by factor of two about that point

Or, Plot from  to  Da

Label all possible matches  Label matches used for scoring

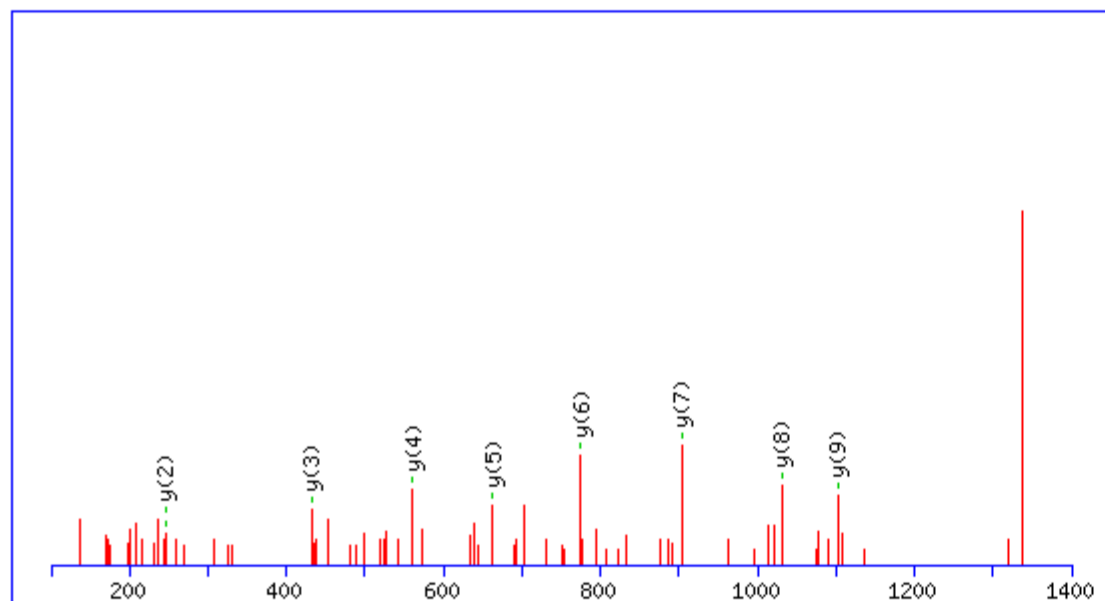

Monoisotopic mass of neutral peptide Mr(calc): 1335.657120

Fixed modifications: Propionamide (C) (apply to specified residues or termini only)

Ions Score: 67 Expect: 2.3e-006

Matches : 8/96 fragment ions using 12 most intense peaks ([help](#))

| #  | b           | b <sup>++</sup> | b <sup>*</sup> | b <sup>*++</sup> | b <sup>0</sup> | b <sup>0++</sup> | Seq. | y                  | y <sup>++</sup> | y <sup>*</sup> | y <sup>*++</sup> | y <sup>0</sup> | y <sup>0++</sup> | #  |
|----|-------------|-----------------|----------------|------------------|----------------|------------------|------|--------------------|-----------------|----------------|------------------|----------------|------------------|----|
| 1  | 72.044390   | 36.525833       |                |                  |                |                  | A    |                    |                 |                |                  |                |                  | 11 |
| 2  | 235.107719  | 118.057498      |                |                  |                |                  | Y    | 1265.627314        | 633.317295      | 1248.600765    | 624.804021       | 1247.616749    | 624.312013       | 10 |
| 3  | 306.144833  | 153.576055      |                |                  |                |                  | A    | <b>1102.563985</b> | 551.785631      | 1085.537436    | 543.272356       | 1084.553420    | 542.780348       | 9  |
| 4  | 434.203411  | 217.605344      | 417.176862     | 209.092069       |                |                  | Q    | <b>1031.526871</b> | 516.267074      | 1014.500322    | 507.753799       | 1013.516306    | 507.261791       | 8  |
| 5  | 562.261989  | 281.634633      | 545.235440     | 273.121358       |                |                  | Q    | <b>903.468293</b>  | 452.237785      | 886.441744     | 443.724510       | 885.457728     | 443.232502       | 7  |
| 6  | 675.346053  | 338.176665      | 658.319504     | 329.663390       |                |                  | L    | <b>775.409715</b>  | 388.208496      | 758.383166     | 379.695221       | 757.399150     | 379.203213       | 6  |
| 7  | 776.393732  | 388.700504      | 759.367183     | 380.187230       | 758.383167     | 379.695222       | T    | <b>662.325651</b>  | 331.666464      | 645.299102     | 323.153189       | 644.315086     | 322.661181       | 5  |
| 8  | 905.436325  | 453.221801      | 888.409776     | 444.708526       | 887.425760     | 444.216518       | E    | <b>561.277972</b>  | 281.142624      | 544.251423     | 272.629349       | 543.267407     | 272.137341       | 4  |
| 9  | 1091.515638 | 546.261457      | 1074.489089    | 537.748183       | 1073.505073    | 537.256175       | W    | <b>432.235379</b>  | 216.621327      | 415.208830     | 208.108053       |                |                  | 3  |
| 10 | 1162.552752 | 581.780014      | 1145.526203    | 573.266740       | 1144.542187    | 572.774732       | A    | <b>246.156066</b>  | 123.581671      | 229.129517     | 115.068396       |                |                  | 2  |
| 11 |             |                 |                |                  |                |                  | R    | 175.118952         | 88.063114       | 158.092403     | 79.549839        |                |                  | 1  |

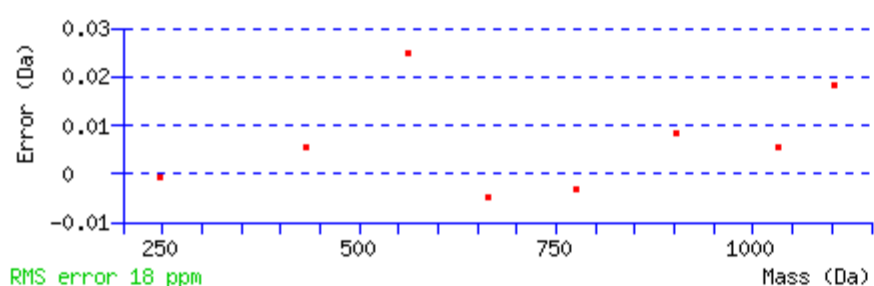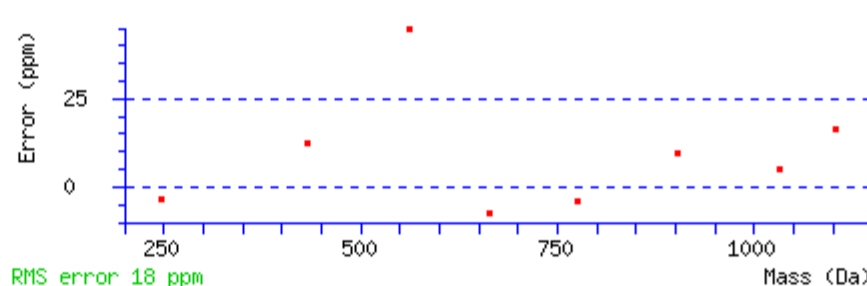

NCBI BLAST search of [AYAQQLTEWAR](#)

(Parameters: blastp, nr protein database, expect=20000, no filter, PAM30)

Other BLAST [web gateways](#)

All matches to this query

| Score | Mr(calc):   | Delta     | Sequence                     |
|-------|-------------|-----------|------------------------------|
| 67.5  | 1335.657120 | 0.001448  | <a href="#">AYAQQLTEWAR</a>  |
| 9.2   | 1335.645248 | 0.013320  | <a href="#">DLSNNTMSLSVR</a> |
| 5.3   | 1335.667892 | -0.009324 | <a href="#">FLNEMIAPVMR</a>  |
| 4.9   | 1335.660507 | -0.001939 | <a href="#">EAGLQMFGLAR</a>  |
| 0.5   | 1335.659164 | -0.000596 | <a href="#">SLDMSIIAEVK</a>  |

Mascot: <http://www.matrixscience.com/>

# MASCOT SEARCH RESULTS

## Peptide View

MS/MS Fragmentation of **SPDEVTLTSIVPTR**

Found in **PACN3\_HUMAN**, Protein kinase C and casein kinase substrate in neurons protein 3 OS=Homo sapiens GN=PACSIN3 PE=1 SV=2

Match to Query 45590: 1513.794228 from(757.904390,2+) rtinseconds(2798) index(38024)

Title: Locus:1.1.1.2613.42

Data file 2011-11-13 - TFD - EP 7-3.mgf

Click mouse within plot area to zoom in by factor of two about that point

Or,   to  Da

Label all possible matches  Label matches used for scoring

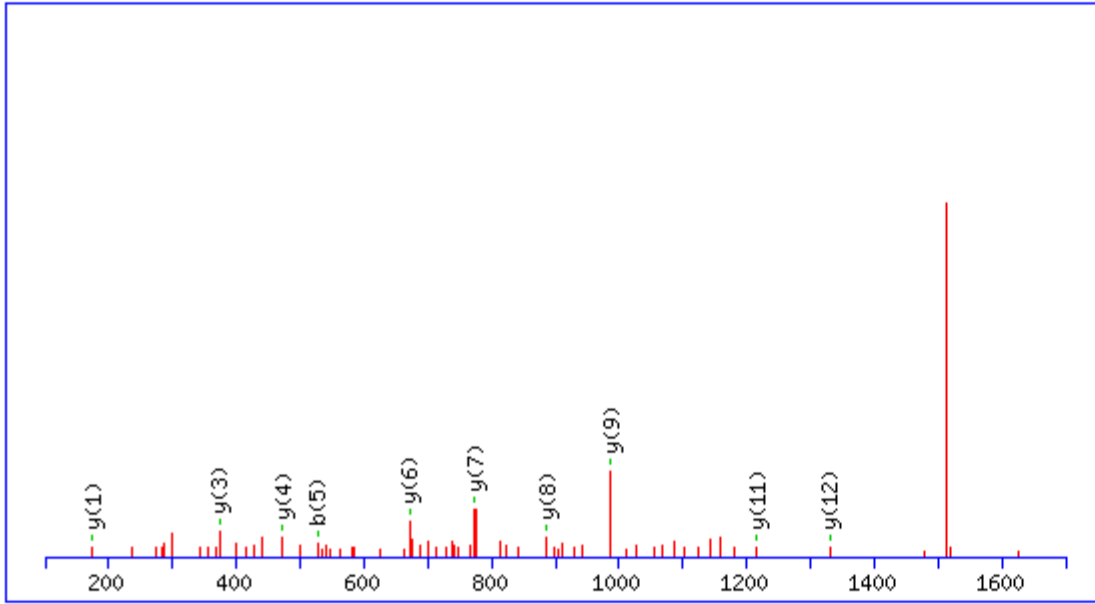

Monoisotopic mass of neutral peptide Mr(calc): 1513.798798

Fixed modifications: Propionamide (C) (apply to specified residues or termini only)

Ions Score: 74 Expect: 2.2e-007

Matches : 10/128 fragment ions using 13 most intense peaks [\(help\)](#)

| #  | b                 | b <sup>++</sup> | b <sup>0</sup> | b <sup>0++</sup> | Seq. | y                  | y <sup>++</sup> | y <sup>*</sup> | y <sup>*++</sup> | y <sup>0</sup> | y <sup>0++</sup> | #  |
|----|-------------------|-----------------|----------------|------------------|------|--------------------|-----------------|----------------|------------------|----------------|------------------|----|
| 1  | 88.039304         | 44.523290       | 70.028739      | 35.518008        | S    |                    |                 |                |                  |                |                  | 14 |
| 2  | 185.092068        | 93.049672       | 167.081503     | 84.044389        | P    | 1427.774037        | 714.390657      | 1410.747488    | 705.877382       | 1409.763472    | 705.385374       | 13 |
| 3  | 300.119011        | 150.563144      | 282.108446     | 141.557861       | D    | <b>1330.721273</b> | 665.864275      | 1313.694724    | 657.351000       | 1312.710708    | 656.858992       | 12 |
| 4  | 429.161604        | 215.084440      | 411.151039     | 206.079158       | E    | <b>1215.694330</b> | 608.350803      | 1198.667781    | 599.837529       | 1197.683765    | 599.345521       | 11 |
| 5  | <b>528.230018</b> | 264.618647      | 510.219453     | 255.613365       | V    | 1086.651737        | 543.829507      | 1069.625188    | 535.316232       | 1068.641172    | 534.824224       | 10 |
| 6  | 629.277697        | 315.142487      | 611.267132     | 306.137204       | T    | <b>987.583323</b>  | 494.295300      | 970.556774     | 485.782025       | 969.572758     | 485.290017       | 9  |
| 7  | 742.361761        | 371.684519      | 724.351196     | 362.679236       | L    | <b>886.535644</b>  | 443.771460      | 869.509095     | 435.258186       | 868.525079     | 434.766178       | 8  |
| 8  | 843.409440        | 422.208358      | 825.398875     | 413.203076       | T    | <b>773.451580</b>  | 387.229428      | 756.425031     | 378.716154       | 755.441015     | 378.224146       | 7  |
| 9  | 930.441468        | 465.724372      | 912.430903     | 456.719090       | S    | <b>672.403901</b>  | 336.705589      | 655.377352     | 328.192314       | 654.393336     | 327.700306       | 6  |
| 10 | 1043.525532       | 522.266404      | 1025.514967    | 513.261122       | I    | 585.371873         | 293.189575      | 568.345324     | 284.676300       | 567.361308     | 284.184292       | 5  |
| 11 | 1142.593946       | 571.800611      | 1124.583381    | 562.795329       | V    | <b>472.287809</b>  | 236.647543      | 455.261260     | 228.134268       | 454.277244     | 227.642260       | 4  |
| 12 | 1239.646710       | 620.326993      | 1221.636145    | 611.321711       | P    | <b>373.219395</b>  | 187.113335      | 356.192846     | 178.600061       | 355.208830     | 178.108053       | 3  |
| 13 | 1340.694389       | 670.850833      | 1322.683824    | 661.845550       | T    | 276.166631         | 138.586953      | 259.140082     | 130.073679       | 258.156066     | 129.581671       | 2  |
| 14 |                   |                 |                |                  | R    | <b>175.118952</b>  | 88.063114       | 158.092403     | 79.549839        |                |                  | 1  |

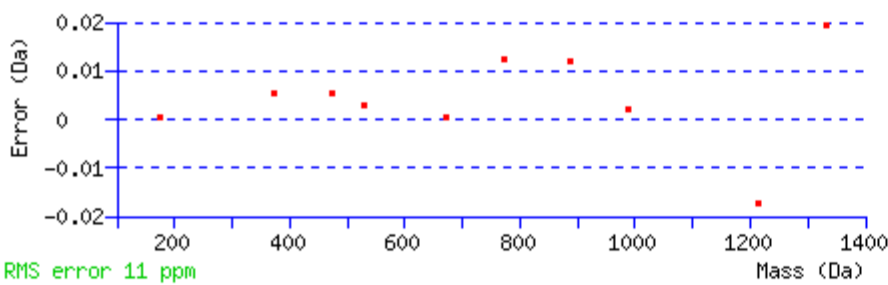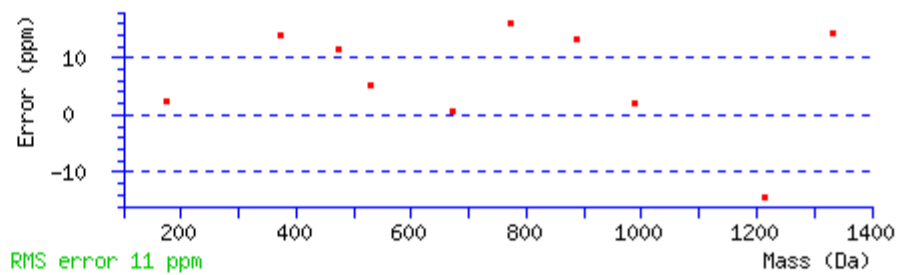

NCBI BLAST search of **SPDEVTLTSIVPTR**

(Parameters: blastp, nr protein database, expect=20000, no filter, PAM30)

Other BLAST [web gateways](#)

## All matches to this query

| Score | Mr(calc):   | Delta     | Sequence                       |
|-------|-------------|-----------|--------------------------------|
| 74.5  | 1513.798798 | -0.004570 | <a href="#">SPDEVTLTSIVPTR</a> |
| 3.5   | 1513.788864 | 0.005364  | <a href="#">QSWGLENEALIVR</a>  |

Mascot: <http://www.matrixscience.com/>



# MASCOT Search Results

## Peptide View

MS/MS Fragmentation of **LLAEALNQVTQR**

Found in **KPCD\_HUMAN**, Protein kinase C delta type OS=Homo sapiens GN=PRKCD PE=1 SV=2

Match to Query 37282: 1354.756788 from(678.385670,2+) rtinseconds(2608) index(30485)

Title: Locus:1.1.1.2632.38

Data file 2011-11-12 - TFD - EP 5-2.mgf

Click mouse within plot area to zoom in by factor of two about that point

Or, Plot from  to  Da

Label all possible matches  Label matches used for scoring

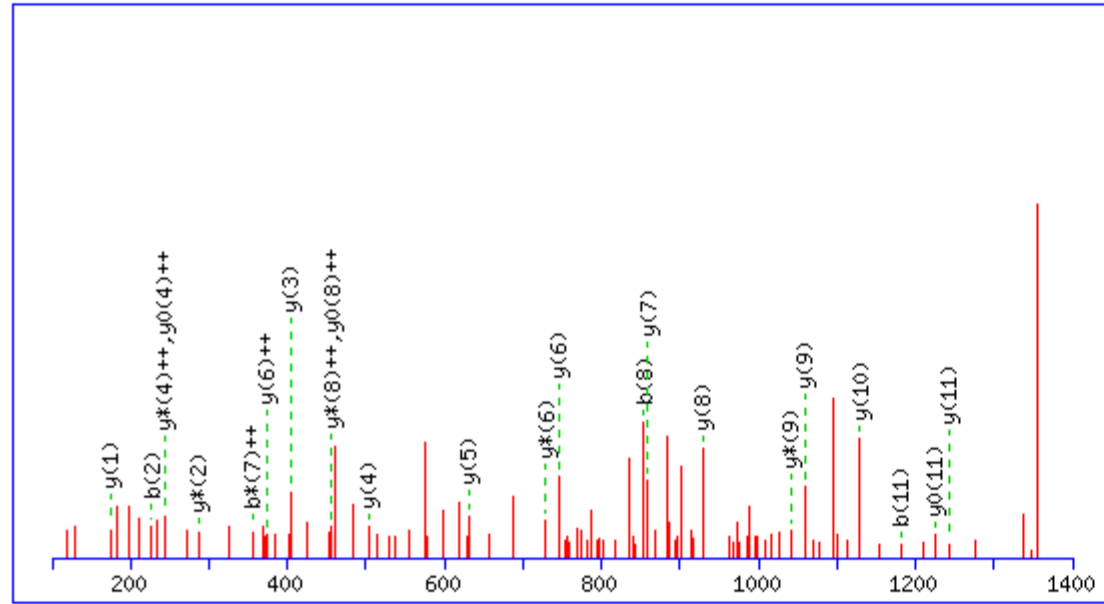

Monoisotopic mass of neutral peptide Mr(calc): 1354.756836

Fixed modifications: Propionamide (C) (apply to specified residues or termini only)

Ions Score: 39 Expect: 0.00094

Matches : 23/110 fragment ions using 68 most intense peaks [\(help\)](#)

| #  | b                  | b <sup>++</sup> | b <sup>*</sup> | b <sup>*++</sup>  | b <sup>0</sup> | b <sup>0++</sup> | Seq. | y                  | y <sup>++</sup>   | y <sup>*</sup>     | y <sup>*++</sup>  | y <sup>0</sup>     | y <sup>0++</sup>  | #  |
|----|--------------------|-----------------|----------------|-------------------|----------------|------------------|------|--------------------|-------------------|--------------------|-------------------|--------------------|-------------------|----|
| 1  | 114.091340         | 57.549308       |                |                   |                |                  | L    |                    |                   |                    |                   |                    |                   | 12 |
| 2  | <b>227.175404</b>  | 114.091340      |                |                   |                |                  | L    | <b>1242.680077</b> | 621.843677        | 1225.653528        | 613.330402        | <b>1224.669512</b> | 612.838394        | 11 |
| 3  | 298.212518         | 149.609897      |                |                   |                |                  | A    | <b>1129.596013</b> | 565.301644        | 1112.569464        | 556.788370        | 1111.585448        | 556.296362        | 10 |
| 4  | 427.255111         | 214.131193      |                |                   | 409.244546     | 205.125911       | E    | <b>1058.558899</b> | 529.783087        | <b>1041.532350</b> | 521.269813        | 1040.548334        | 520.777805        | 9  |
| 5  | 498.292225         | 249.649750      |                |                   | 480.281660     | 240.644468       | A    | <b>929.516306</b>  | 465.261791        | 912.489757         | <b>456.748516</b> | 911.505741         | <b>456.256508</b> | 8  |
| 6  | 611.376289         | 306.191783      |                |                   | 593.365724     | 297.186500       | L    | <b>858.479192</b>  | 429.743234        | 841.452643         | 421.229959        | 840.468627         | 420.737951        | 7  |
| 7  | 725.419216         | 363.213246      | 708.392667     | <b>354.699972</b> | 707.408651     | 354.207964       | N    | <b>745.395128</b>  | <b>373.201202</b> | <b>728.368579</b>  | 364.687927        | 727.384563         | 364.195919        | 6  |
| 8  | <b>853.477794</b>  | 427.242535      | 836.451245     | 418.729261        | 835.467229     | 418.237253       | Q    | <b>631.352201</b>  | 316.179738        | 614.325652         | 307.666464        | 613.341636         | 307.174456        | 5  |
| 9  | 952.546208         | 476.776742      | 935.519659     | 468.263467        | 934.535643     | 467.771459       | V    | <b>503.293623</b>  | 252.150449        | 486.267074         | <b>243.637175</b> | 485.283058         | <b>243.145167</b> | 4  |
| 10 | 1053.593887        | 527.300582      | 1036.567338    | 518.787307        | 1035.583322    | 518.295299       | T    | <b>404.225209</b>  | 202.616242        | 387.198660         | 194.102968        | 386.214644         | 193.610960        | 3  |
| 11 | <b>1181.652465</b> | 591.329870      | 1164.625916    | 582.816596        | 1163.641900    | 582.324588       | Q    | 303.177530         | 152.092403        | <b>286.150981</b>  | 143.579128        |                    |                   | 2  |
| 12 |                    |                 |                |                   |                |                  | R    | <b>175.118952</b>  | 88.063114         | 158.092403         | 79.549839         |                    |                   | 1  |

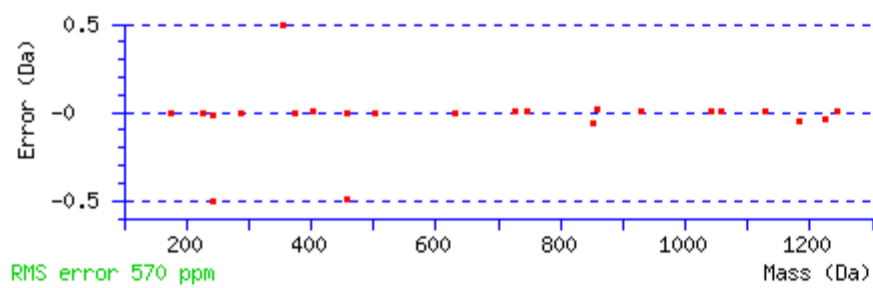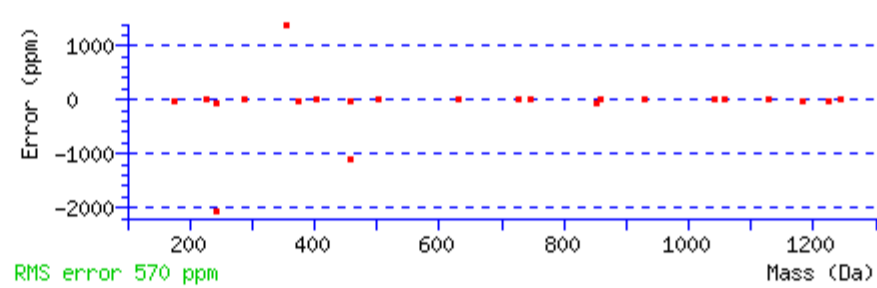

NCBI BLAST search of **LLAEALNQVTQR**

(Parameters: blastp, nr protein database, expect=20000, no filter, PAM30)

Other BLAST [web gateways](#)

All matches to this query

| Score | Mr(calc):   | Delta     | Sequence                     |
|-------|-------------|-----------|------------------------------|
| 39.3  | 1354.756836 | -0.000048 | <a href="#">LLAEALNQVTQR</a> |
| 6.8   | 1354.745605 | 0.011183  | <a href="#">LLAAIDDIRPK</a>  |
| 0.3   | 1354.745651 | 0.011137  | <a href="#">VVPQVETVDILR</a> |

**Peptide View**

MS/MS Fragmentation of **SLAPSLDDR**

Found in **KISHA\_HUMAN**, Protein kish-A OS=Homo sapiens GN=TMEM167A PE=2 SV=1

Match to Query 10415: 970.549708 from(486.282130,2+) rtinseconds(2317) index(13589)

Title: Locus:1.1.1.2606.15

Data file 2011-11-14 - TFD - EP 8-8.mgf

Click mouse within plot area to zoom in by factor of two about that point

Or,   to  Da

Label all possible matches  Label matches used for scoring

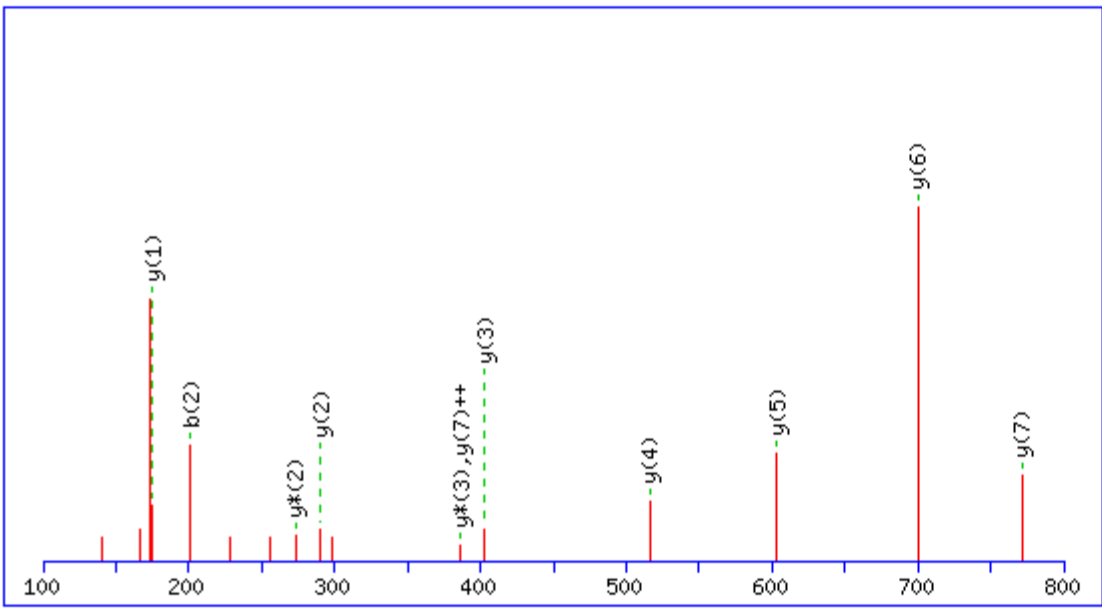

Monoisotopic mass of neutral peptide Mr(calc): 970.544724

Fixed modifications: Propionamide (C) (apply to specified residues or termini only)

Ions Score: 67 Expect: 2.6e-006

Matches : 11/78 fragment ions using 12 most intense peaks [\(help\)](#)

| # | b                 | b <sup>++</sup> | b <sup>0</sup> | b <sup>0++</sup> | Seq. | y                 | y <sup>++</sup>   | y <sup>*</sup>    | y <sup>+++</sup> | y <sup>0</sup> | y <sup>0++</sup> | # |
|---|-------------------|-----------------|----------------|------------------|------|-------------------|-------------------|-------------------|------------------|----------------|------------------|---|
| 1 | 88.039304         | 44.523290       | 70.028739      | 35.518008        | S    |                   |                   |                   |                  |                |                  | 9 |
| 2 | <b>201.123368</b> | 101.065322      | 183.112803     | 92.060039        | L    | 884.519993        | 442.763635        | 867.493444        | 434.250360       | 866.509428     | 433.758352       | 8 |
| 3 | 272.160482        | 136.583879      | 254.149917     | 127.578596       | A    | <b>771.435929</b> | <b>386.221603</b> | 754.409380        | 377.708328       | 753.425364     | 377.216320       | 7 |
| 4 | 369.213246        | 185.110261      | 351.202681     | 176.104978       | P    | <b>700.398815</b> | 350.703046        | 683.372266        | 342.189771       | 682.388250     | 341.697763       | 6 |
| 5 | 456.245274        | 228.626275      | 438.234709     | 219.620992       | S    | <b>603.346051</b> | 302.176664        | 586.319502        | 293.663389       | 585.335486     | 293.171381       | 5 |
| 6 | 569.329338        | 285.168307      | 551.318773     | 276.163025       | L    | <b>516.314023</b> | 258.660650        | 499.287474        | 250.147375       | 498.303458     | 249.655367       | 4 |
| 7 | 682.413402        | 341.710339      | 664.402837     | 332.705057       | L    | <b>403.229959</b> | 202.118617        | <b>386.203410</b> | 193.605343       | 385.219394     | 193.113335       | 3 |
| 8 | 797.440345        | 399.223811      | 779.429780     | 390.218528       | D    | <b>290.145895</b> | 145.576585        | <b>273.119346</b> | 137.063311       | 272.135330     | 136.571303       | 2 |
| 9 |                   |                 |                |                  | R    | <b>175.118952</b> | 88.063114         | 158.092403        | 79.549839        |                |                  | 1 |

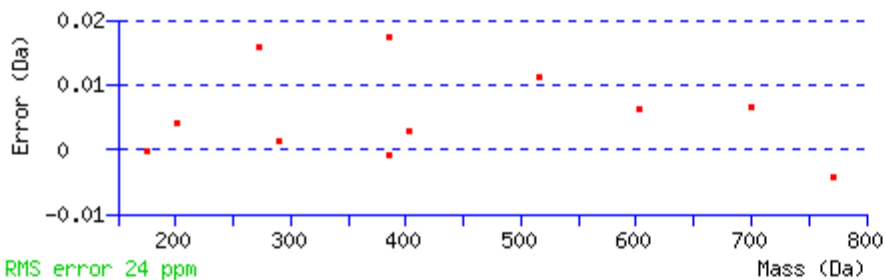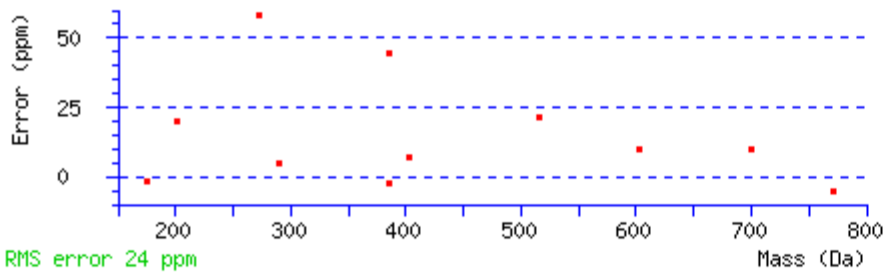

NCBI BLAST search of **SLAPSLDDR**

(Parameters: blastp, nr protein database, expect=20000, no filter, PAM30)

Other BLAST [web gateways](#)

**All matches to this query**

| Score | Mr(calc):  | Delta     | Sequence                   |
|-------|------------|-----------|----------------------------|
| 66.9  | 970.544724 | 0.004984  | <a href="#">SLAPSLDDR</a>  |
| 13.0  | 970.544724 | 0.004984  | <a href="#">AEILSPLGR</a>  |
| 6.8   | 970.544739 | 0.004969  | <a href="#">SLSPILPGR</a>  |
| 5.0   | 970.555954 | -0.006246 | <a href="#">QAVEAAKVR</a>  |
| 5.0   | 970.555969 | -0.006261 | <a href="#">SVRIIDPR</a>   |
| 3.7   | 970.544739 | 0.004969  | <a href="#">SPGSPLLLR</a>  |
| 1.7   | 970.544739 | 0.004969  | <a href="#">GTIIPAQQK</a>  |
| 1.6   | 970.544739 | 0.004969  | <a href="#">SSPSPVILR</a>  |
| 1.4   | 970.555954 | -0.006246 | <a href="#">DRLGLEIR</a>   |
| 1.3   | 970.555969 | -0.006261 | <a href="#">SALGGGKLPR</a> |

# Mascot Search Results

## Peptide View

### MS/MS Fragmentation of IGIGELITR

Found in **K0664\_HUMAN**, Protein KIAA0664 OS=Homo sapiens GN=KIAA0664 PE=1 SV=2

Match to Query 12946: 970.584728 from(486.299640,2+) rtinseconds(2786) index(36568)

Title: Locus:1.1.1.2483.9

Data file 2011-11-10 - TFD - EP 3-1.mgf

Click mouse within plot area to zoom in by factor of two about that point

Or, Plot from  to  Da

Label all possible matches  Label matches used for scoring

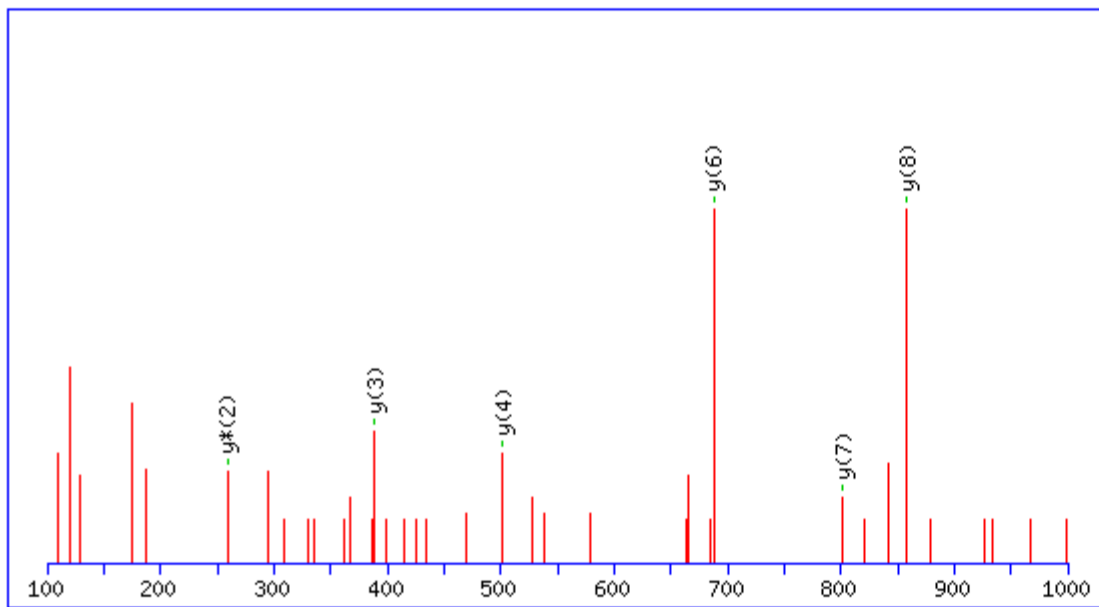

Monoisotopic mass of neutral peptide Mr(calc): 970.581116

Fixed modifications: Propionamide (C) (apply to specified residues or termini only)

Ions Score: 38 Expect: 0.0015

Matches : 6/70 fragment ions using 9 most intense peaks ([help](#))

| # | b          | b <sup>++</sup> | b <sup>0</sup> | b <sup>0++</sup> | Seq. | y          | y <sup>++</sup> | y <sup>*</sup> | y <sup>*++</sup> | y <sup>0</sup> | y <sup>0++</sup> | # |
|---|------------|-----------------|----------------|------------------|------|------------|-----------------|----------------|------------------|----------------|------------------|---|
| 1 | 114.091340 | 57.549308       |                |                  | I    |            |                 |                |                  |                |                  | 9 |
| 2 | 171.112804 | 86.060040       |                |                  | G    | 858.504344 | 429.755810      | 841.477795     | 421.242536       | 840.493779     | 420.750528       | 8 |
| 3 | 284.196868 | 142.602072      |                |                  | I    | 801.482880 | 401.245078      | 784.456331     | 392.731804       | 783.472315     | 392.239796       | 7 |
| 4 | 341.218332 | 171.112804      |                |                  | G    | 688.398816 | 344.703046      | 671.372267     | 336.189772       | 670.388251     | 335.697764       | 6 |
| 5 | 470.260925 | 235.634100      | 452.250360     | 226.628818       | E    | 631.377352 | 316.192314      | 614.350803     | 307.679040       | 613.366787     | 307.187032       | 5 |
| 6 | 583.344989 | 292.176133      | 565.334424     | 283.170850       | L    | 502.334759 | 251.671017      | 485.308210     | 243.157743       | 484.324194     | 242.665735       | 4 |
| 7 | 696.429053 | 348.718165      | 678.418488     | 339.712882       | I    | 389.250695 | 195.128985      | 372.224146     | 186.615711       | 371.240130     | 186.123703       | 3 |
| 8 | 797.476732 | 399.242004      | 779.466167     | 390.236722       | T    | 276.166631 | 138.586953      | 259.140082     | 130.073679       | 258.156066     | 129.581671       | 2 |
| 9 |            |                 |                |                  | R    | 175.118952 | 88.063114       | 158.092403     | 79.549839        |                |                  | 1 |

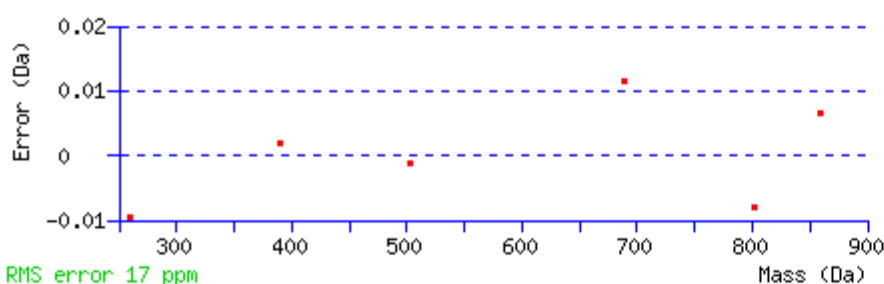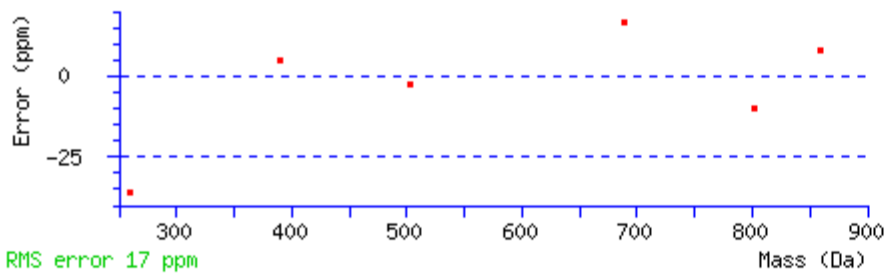

### NCBI BLAST search of IGIGELITR

(Parameters: blastp, nr protein database, expect=20000, no filter, PAM30)

Other BLAST [web gateways](#)

### All matches to this query

| Score | Mr(calc):  | Delta     | Sequence                   |
|-------|------------|-----------|----------------------------|
| 37.5  | 970.581116 | 0.003612  | <a href="#">IGIGELITR</a>  |
| 9.8   | 970.592346 | -0.007618 | <a href="#">LLRSPTLR</a>   |
| 4.5   | 970.581116 | 0.003612  | <a href="#">LEVLQLTR</a>   |
| 1.4   | 970.592361 | -0.007633 | <a href="#">LAVGVKATGR</a> |
| 0.1   | 970.581116 | 0.003612  | <a href="#">LDLAAVTLR</a>  |

# Mascot Search Results

## Peptide View

MS/MS Fragmentation of **LQGEVVAFDYQSK**

Found in **LSM12\_HUMAN**, Protein LSM12 homolog OS=Homo sapiens GN=LSM12 PE=1 SV=2

Match to Query 40037: 1482.739108 from(742.376830,2+) rtinseconds(2470) index(26678)

Title: Locus:1.1.1.2561.48

Data file 2011-11-10 - TFD - EP 3-5.mgf

Click mouse within plot area to zoom in by factor of two about that point

Or, Plot from  to  Da

Label all possible matches  Label matches used for scoring

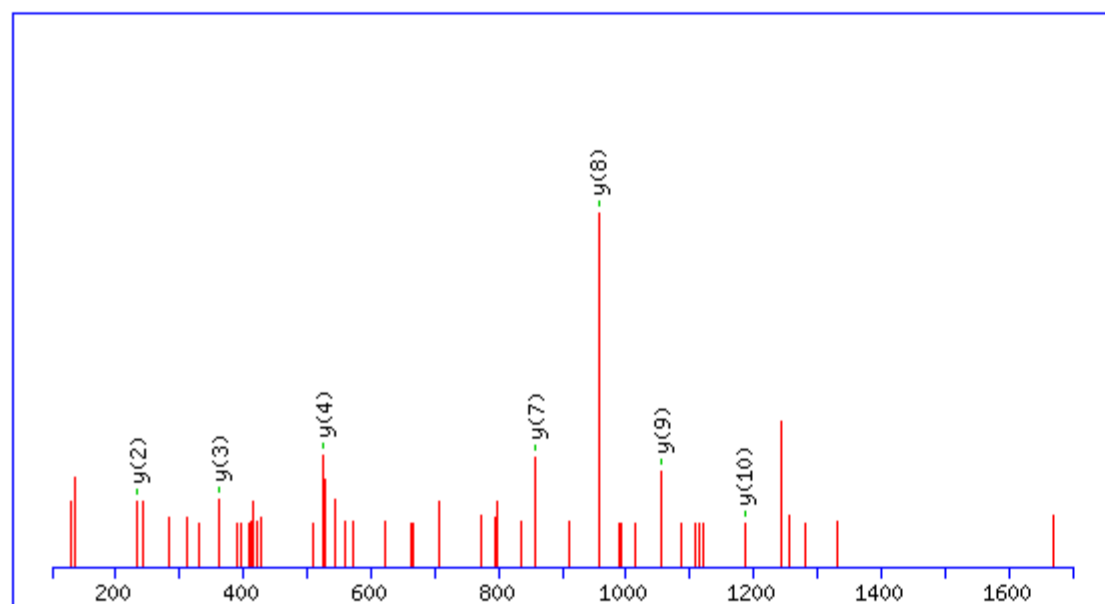

Monoisotopic mass of neutral peptide Mr(calc): 1482.735458

Fixed modifications: Propionamide (C) (apply to specified residues or termini only)

Ions Score: 46 Expect: 0.00018

Matches : 7/134 fragment ions using 12 most intense peaks [\(help\)](#)

| #  | b           | b <sup>++</sup> | b*          | b <sup>*++</sup> | b <sup>0</sup> | b <sup>0++</sup> | Seq. | y                  | y <sup>++</sup> | y*          | y <sup>*++</sup> | y <sup>0</sup> | y <sup>0++</sup> | #  |
|----|-------------|-----------------|-------------|------------------|----------------|------------------|------|--------------------|-----------------|-------------|------------------|----------------|------------------|----|
| 1  | 114.091340  | 57.549308       |             |                  |                |                  | L    |                    |                 |             |                  |                |                  | 13 |
| 2  | 242.149918  | 121.578597      | 225.123369  | 113.065323       |                |                  | Q    | 1370.658673        | 685.832975      | 1353.632124 | 677.319700       | 1352.648108    | 676.827692       | 12 |
| 3  | 299.171382  | 150.089329      | 282.144833  | 141.576055       |                |                  | G    | 1242.600095        | 621.803686      | 1225.573546 | 613.290411       | 1224.589530    | 612.798403       | 11 |
| 4  | 428.213975  | 214.610626      | 411.187426  | 206.097351       | 410.203410     | 205.605343       | E    | <b>1185.578631</b> | 593.292954      | 1168.552082 | 584.779679       | 1167.568066    | 584.287671       | 10 |
| 5  | 527.282389  | 264.144833      | 510.255840  | 255.631558       | 509.271824     | 255.139550       | V    | <b>1056.536038</b> | 528.771657      | 1039.509489 | 520.258383       | 1038.525473    | 519.766375       | 9  |
| 6  | 626.350803  | 313.679040      | 609.324254  | 305.165765       | 608.340238     | 304.673757       | V    | <b>957.467624</b>  | 479.237450      | 940.441075  | 470.724176       | 939.457059     | 470.232168       | 8  |
| 7  | 697.387917  | 349.197597      | 680.361368  | 340.684322       | 679.377352     | 340.192314       | A    | <b>858.399210</b>  | 429.703243      | 841.372661  | 421.189969       | 840.388645     | 420.697961       | 7  |
| 8  | 844.456331  | 422.731804      | 827.429782  | 414.218529       | 826.445766     | 413.726521       | F    | 787.362096         | 394.184686      | 770.335547  | 385.671412       | 769.351531     | 385.179404       | 6  |
| 9  | 959.483274  | 480.245275      | 942.456725  | 471.732000       | 941.472709     | 471.239992       | D    | 640.293682         | 320.650479      | 623.267133  | 312.137205       | 622.283117     | 311.645197       | 5  |
| 10 | 1122.546603 | 561.776940      | 1105.520054 | 553.263665       | 1104.536038    | 552.771657       | Y    | <b>525.266739</b>  | 263.137008      | 508.240190  | 254.623733       | 507.256174     | 254.131725       | 4  |
| 11 | 1250.605181 | 625.806229      | 1233.578632 | 617.292954       | 1232.594616    | 616.800946       | Q    | <b>362.203410</b>  | 181.605343      | 345.176861  | 173.092069       | 344.192845     | 172.600061       | 3  |
| 12 | 1337.637209 | 669.322243      | 1320.610660 | 660.808968       | 1319.626644    | 660.316960       | S    | <b>234.144832</b>  | 117.576054      | 217.118283  | 109.062780       | 216.134267     | 108.570772       | 2  |
| 13 |             |                 |             |                  |                |                  | K    | 147.112804         | 74.060040       | 130.086255  | 65.546765        |                |                  | 1  |

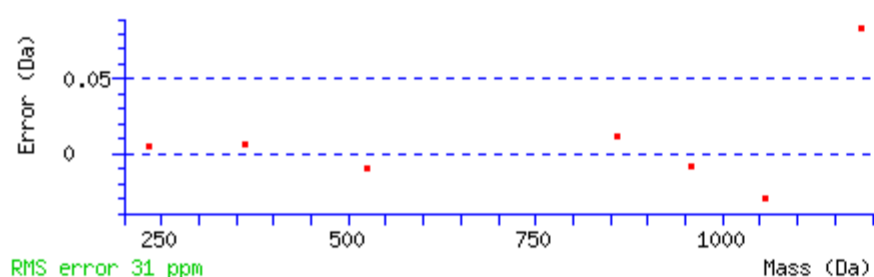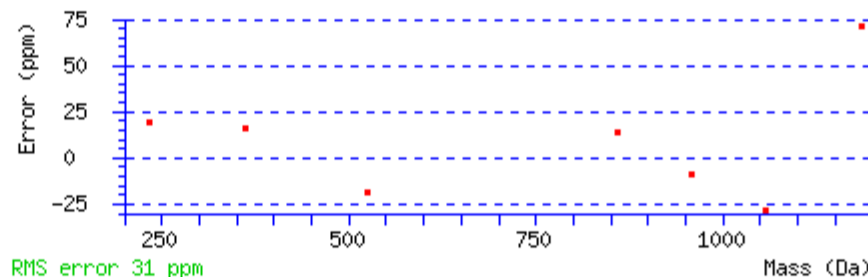

NCBI BLAST search of **LQGEVVAFDYQSK**

(Parameters: blastp, nr protein database, expect=20000, no filter, PAM30)

Other BLAST [web gateways](#)

All matches to this query

| Score | Mr(calc):   | Delta    | Sequence                      |
|-------|-------------|----------|-------------------------------|
| 46.5  | 1482.735458 | 0.003650 | <a href="#">LQGEVVAFDYQSK</a> |

Mascot: <http://www.matrixscience.com/>

# **MASCOT** Mascot Search Results

## Peptide View

MS/MS Fragmentation of **TVEVAEGEAVR**

Found in **LYRIC\_HUMAN**, Protein LYRIC OS=Homo sapiens GN=MTDH PE=1 SV=2

Match to Query 469188: 1158.584468 from(580.299510,2+) rtinseconds(1454) index(337024)

Title: Locus:1.1.1.890.29

Data file C:\Program Files (x86)\Matrix Science\Mascot Daemon\mgf3 TFD - Epitel - R2\mascot\_daemon\_merge.mgf

Click mouse within plot area to zoom in by factor of two about that point

Or, Plot from  to  Da

Label all possible matches  Label matches used for scoring

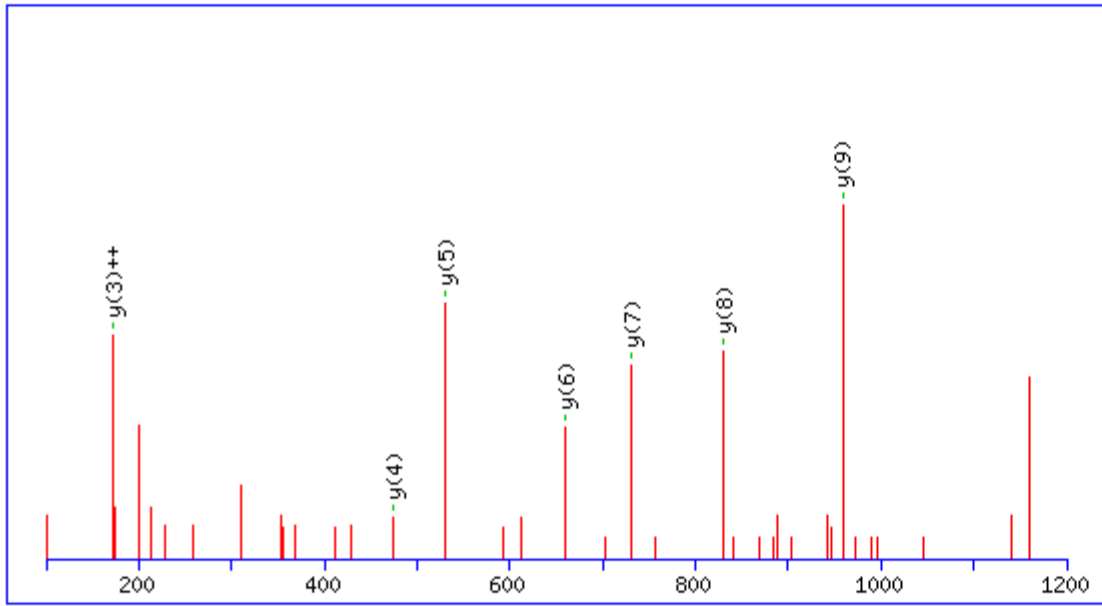

Monoisotopic mass of neutral peptide Mr(calc): 1158.588058

Fixed modifications: Carbamidomethyl (C) (apply to specified residues or termini only)

Ions Score: 46 Expect: 0.00045

Matches : 7/94 fragment ions using 11 most intense peaks ([help](#))

| #  | b          | b <sup>++</sup> | b <sup>0</sup> | b <sup>0++</sup> | Seq. | y                 | y <sup>++</sup>   | y <sup>*</sup> | y <sup>*++</sup> | y <sup>0</sup> | y <sup>0++</sup> | #  |
|----|------------|-----------------|----------------|------------------|------|-------------------|-------------------|----------------|------------------|----------------|------------------|----|
| 1  | 102.054955 | 51.531116       | 84.044390      | 42.525833        | T    |                   |                   |                |                  |                |                  | 11 |
| 2  | 201.123369 | 101.065322      | 183.112804     | 92.060040        | V    | 1058.547665       | 529.777471        | 1041.521116    | 521.264196       | 1040.537100    | 520.772188       | 10 |
| 3  | 330.165962 | 165.586619      | 312.155397     | 156.581336       | E    | <b>959.479251</b> | 480.243264        | 942.452702     | 471.729989       | 941.468686     | 471.237981       | 9  |
| 4  | 429.234376 | 215.120826      | 411.223811     | 206.115544       | V    | <b>830.436658</b> | 415.721967        | 813.410109     | 407.208693       | 812.426093     | 406.716685       | 8  |
| 5  | 500.271490 | 250.639383      | 482.260925     | 241.634101       | A    | <b>731.368244</b> | 366.187760        | 714.341695     | 357.674486       | 713.357679     | 357.182478       | 7  |
| 6  | 629.314083 | 315.160680      | 611.303518     | 306.155397       | E    | <b>660.331130</b> | 330.669203        | 643.304581     | 322.155929       | 642.320565     | 321.663921       | 6  |
| 7  | 686.335547 | 343.671412      | 668.324982     | 334.666129       | G    | <b>531.288537</b> | 266.147907        | 514.261988     | 257.634632       | 513.277972     | 257.142624       | 5  |
| 8  | 815.378140 | 408.192708      | 797.367575     | 399.187426       | E    | <b>474.267073</b> | 237.637174        | 457.240524     | 229.123900       | 456.256508     | 228.631892       | 4  |
| 9  | 886.415254 | 443.711265      | 868.404689     | 434.705983       | A    | 345.224480        | <b>173.115878</b> | 328.197931     | 164.602603       |                |                  | 3  |
| 10 | 985.483668 | 493.245472      | 967.473103     | 484.240190       | V    | 274.187366        | 137.597321        | 257.160817     | 129.084046       |                |                  | 2  |
| 11 |            |                 |                |                  | R    | 175.118952        | 88.063114         | 158.092403     | 79.549839        |                |                  | 1  |

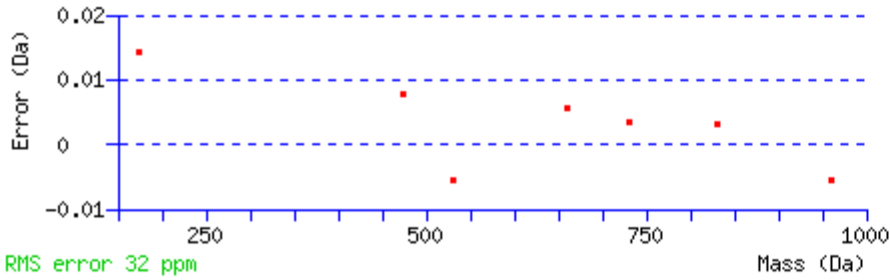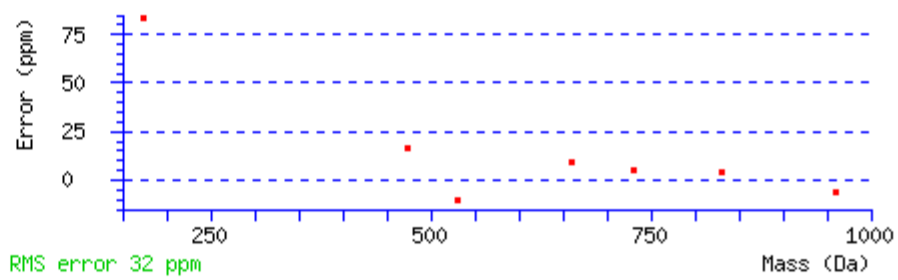

NCBI BLAST search of [TVEVAEGEAVR](#)

(Parameters: blastp, nr protein database, expect=20000, no filter, PAM30)

Other BLAST [web gateways](#)

## All matches to this query

| Score | Mr(calc):   | Delta     | Sequence                     |
|-------|-------------|-----------|------------------------------|
| 45.6  | 1158.588058 | -0.003590 | <a href="#">TVEVAEGEAVR</a>  |
| 10.7  | 1158.574326 | 0.010142  | <a href="#">NVSKISFFAM</a>   |
| 6.8   | 1158.574127 | 0.010341  | <a href="#">GSGAGELGRAER</a> |
| 6.5   | 1158.588043 | -0.003575 | <a href="#">LSGVVEELQR</a>   |
| 1.4   | 1158.588043 | -0.003575 | <a href="#">VNKAQEDDLK</a>   |
| 1.1   | 1158.595444 | -0.010976 | <a href="#">VLGKPKPEEM</a>   |
| 1.1   | 1158.595444 | -0.010976 | <a href="#">VLGKPKPEEM</a>   |
| 0.5   | 1158.585556 | -0.001088 | <a href="#">LHCAFASLPK</a>   |
| 0.3   | 1158.578125 | 0.006343  | <a href="#">EAEWREALR</a>    |

Mascot: <http://www.matrixscience.com/>

# MASCOT SCIENCE Mascot Search Results

## Peptide View

### MS/MS Fragmentation of **VTLPAGPDILR**

Found in **MAL2\_HUMAN**, Protein MAL2 OS=Homo sapiens GN=MAL2 PE=1 SV=1

Match to Query 26614: 1150.674748 from(576.344650,2+) rtinseconds(2781) index(34078)

Title: Locus:1.1.1.2328.24

Data file 2011-11-10 - TFD - EP 3-6.mgf

Click mouse within plot area to zoom in by factor of two about that point

Or, Plot from  to  Da

Label all possible matches  Label matches used for scoring

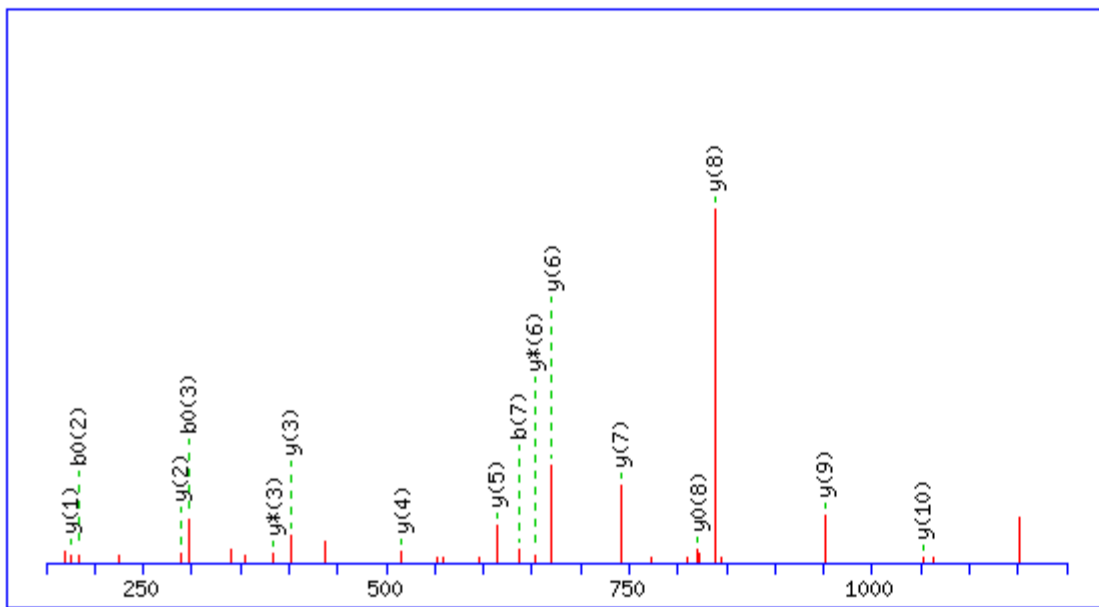

Monoisotopic mass of neutral peptide Mr(calc): 1150.671005

Fixed modifications: Propionamide (C) (apply to specified residues or termini only)

Ions Score: 86 Expect: 9.1e-009

Matches : 16/92 fragment ions using 23 most intense peaks [\(help\)](#)

| #  | b          | b <sup>++</sup> | b <sup>0</sup> | b <sup>0++</sup> | Seq. | y           | y <sup>++</sup> | y <sup>*</sup> | y <sup>*++</sup> | y <sup>0</sup> | y <sup>0++</sup> | #  |
|----|------------|-----------------|----------------|------------------|------|-------------|-----------------|----------------|------------------|----------------|------------------|----|
| 1  | 100.075690 | 50.541483       |                |                  | V    |             |                 |                |                  |                |                  | 11 |
| 2  | 201.123369 | 101.065322      | 183.112804     | 92.060040        | T    | 1052.609872 | 526.808574      | 1035.583323    | 518.295300       | 1034.599307    | 517.803292       | 10 |
| 3  | 314.207433 | 157.607354      | 296.196868     | 148.602072       | L    | 951.562193  | 476.284735      | 934.535644     | 467.771460       | 933.551628     | 467.279452       | 9  |
| 4  | 411.260197 | 206.133737      | 393.249632     | 197.128454       | P    | 838.478129  | 419.742703      | 821.451580     | 411.229428       | 820.467564     | 410.737420       | 8  |
| 5  | 482.297311 | 241.652293      | 464.286746     | 232.647011       | A    | 741.425365  | 371.216321      | 724.398816     | 362.703046       | 723.414800     | 362.211038       | 7  |
| 6  | 539.318775 | 270.163026      | 521.308210     | 261.157743       | G    | 670.388251  | 335.697764      | 653.361702     | 327.184489       | 652.377686     | 326.692481       | 6  |
| 7  | 636.371539 | 318.689408      | 618.360974     | 309.684125       | P    | 613.366787  | 307.187032      | 596.340238     | 298.673757       | 595.356222     | 298.181749       | 5  |
| 8  | 751.398482 | 376.202879      | 733.387917     | 367.197597       | D    | 516.314023  | 258.660650      | 499.287474     | 250.147375       | 498.303458     | 249.655367       | 4  |
| 9  | 864.482546 | 432.744911      | 846.471981     | 423.739629       | I    | 401.287080  | 201.147178      | 384.260531     | 192.633903       |                |                  | 3  |
| 10 | 977.566610 | 489.286943      | 959.556045     | 480.281661       | L    | 288.203016  | 144.605146      | 271.176467     | 136.091871       |                |                  | 2  |
| 11 |            |                 |                |                  | R    | 175.118952  | 88.063114       | 158.092403     | 79.549839        |                |                  | 1  |

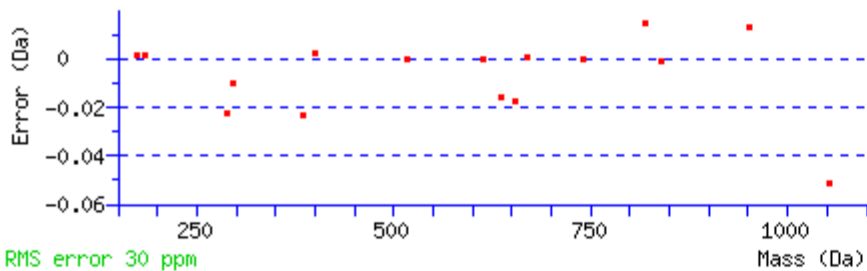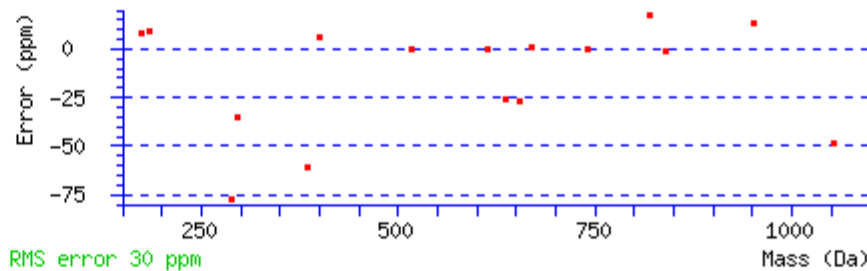

### NCBI BLAST search of **VTLPAGPDILR**

(Parameters: blastp, nr protein database, expect=20000, no filter, PAM30)

Other BLAST [web gateways](#)

### All matches to this query

| Score | Mr(calc):   | Delta     | Sequence                    |
|-------|-------------|-----------|-----------------------------|
| 85.6  | 1150.671005 | 0.003743  | <a href="#">VTLPAGPDILR</a> |
| 5.4   | 1150.682205 | -0.007457 | <a href="#">ILNPNKAPLR</a>  |
| 3.1   | 1150.682220 | -0.007472 | <a href="#">SPARLLPLPR</a>  |

# MASCOT SCIENCE Mascot Search Results

## Peptide View

MS/MS Fragmentation of **SHEAEAEPSEPR**

Found in **MANBL\_HUMAN**, Protein MANBAL OS=Homo sapiens GN=MANBAL PE=1 SV=1

Match to Query 682785: 1337.586162 from(446.869330,3+) rtinseconds(820) index(409314)

Title: Locus:1.1.1.646.6

Data file C:\Program Files (x86)\Matrix Science\Mascot Daemon\mgf3 TFD - Epitel - R2\mascot\_daemon\_merge.mgf

Click mouse within plot area to zoom in by factor of two about that point

Or, Plot from  to  Da

Label all possible matches  Label matches used for scoring

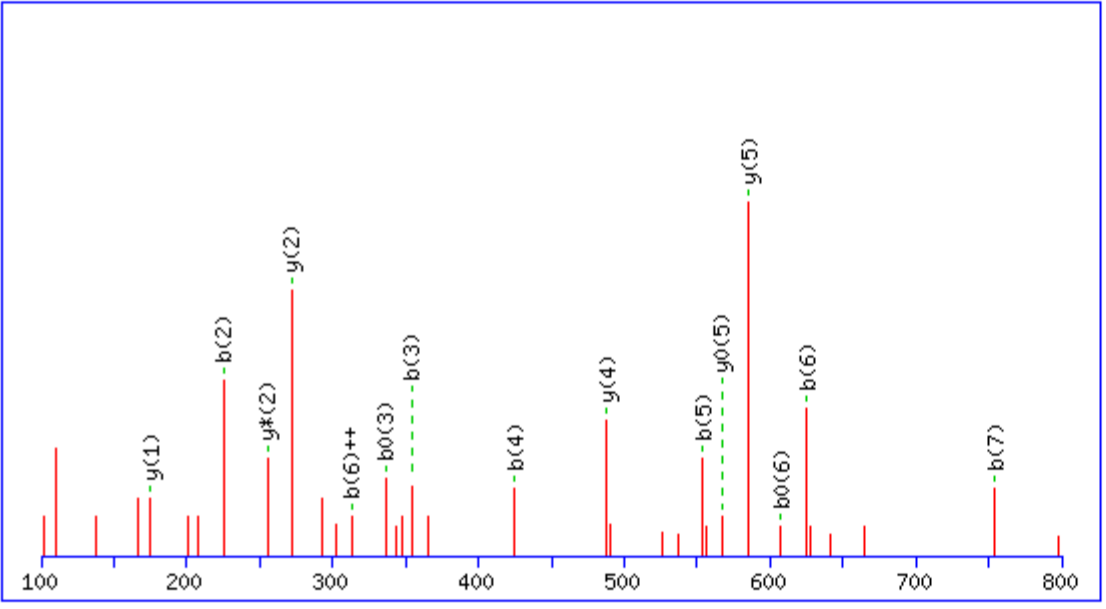

Monoisotopic mass of neutral peptide  $M_r(\text{calc})$ : 1337.584732

Fixed modifications: Carbamidomethyl (C) (apply to specified residues or termini only)

Ions Score: 50 Expect: 2.2e-005

Matches : 15/106 fragment ions using 20 most intense peaks [\(help\)](#)

| #  | b                 | b <sup>++</sup>   | b <sup>0</sup>    | b <sup>0++</sup> | Seq. | y                 | y <sup>++</sup> | y <sup>*</sup>    | y <sup>*++</sup> | y <sup>0</sup>    | y <sup>0++</sup> | #  |
|----|-------------------|-------------------|-------------------|------------------|------|-------------------|-----------------|-------------------|------------------|-------------------|------------------|----|
| 1  | 88.039304         | 44.523290         | 70.028739         | 35.518008        | S    |                   |                 |                   |                  |                   |                  | 12 |
| 2  | <b>225.098216</b> | 113.052746        | 207.087651        | 104.047463       | H    | 1251.560020       | 626.283648      | 1234.533471       | 617.770374       | 1233.549455       | 617.278366       | 11 |
| 3  | <b>354.140809</b> | 177.574042        | <b>336.130244</b> | 168.568760       | E    | 1114.501108       | 557.754192      | 1097.474559       | 549.240918       | 1096.490543       | 548.748910       | 10 |
| 4  | <b>425.177923</b> | 213.092600        | 407.167358        | 204.087317       | A    | 985.458515        | 493.232896      | 968.431966        | 484.719621       | 967.447950        | 484.227613       | 9  |
| 5  | <b>554.220516</b> | 277.613896        | 536.209951        | 268.608614       | E    | 914.421401        | 457.714339      | 897.394852        | 449.201064       | 896.410836        | 448.709056       | 8  |
| 6  | <b>625.257630</b> | <b>313.132453</b> | <b>607.247065</b> | 304.127171       | A    | 785.378808        | 393.193042      | 768.352259        | 384.679768       | 767.368243        | 384.187760       | 7  |
| 7  | <b>754.300223</b> | 377.653750        | 736.289658        | 368.648467       | E    | 714.341694        | 357.674485      | 697.315145        | 349.161211       | 696.331129        | 348.669203       | 6  |
| 8  | 851.352987        | 426.180132        | 833.342422        | 417.174849       | P    | <b>585.299101</b> | 293.153189      | 568.272552        | 284.639914       | <b>567.288536</b> | 284.147906       | 5  |
| 9  | 938.385015        | 469.696146        | 920.374450        | 460.690863       | S    | <b>488.246337</b> | 244.626807      | 471.219788        | 236.113532       | 470.235772        | 235.621524       | 4  |
| 10 | 1067.427608       | 534.217442        | 1049.417043       | 525.212160       | E    | 401.214309        | 201.110793      | 384.187760        | 192.597518       | 383.203744        | 192.105510       | 3  |
| 11 | 1164.480372       | 582.743824        | 1146.469807       | 573.738542       | P    | <b>272.171716</b> | 136.589496      | <b>255.145167</b> | 128.076221       |                   |                  | 2  |
| 12 |                   |                   |                   |                  | R    | <b>175.118952</b> | 88.063114       | 158.092403        | 79.549839        |                   |                  | 1  |

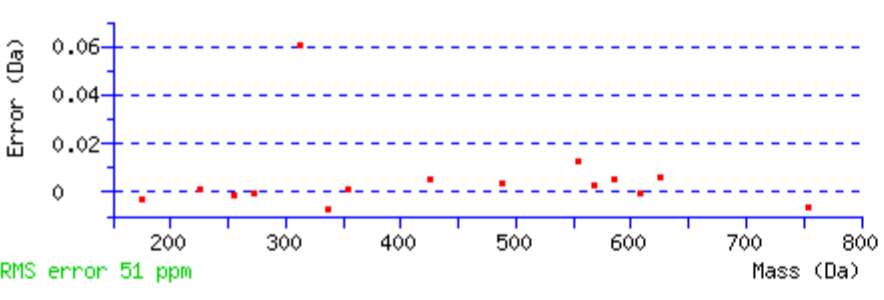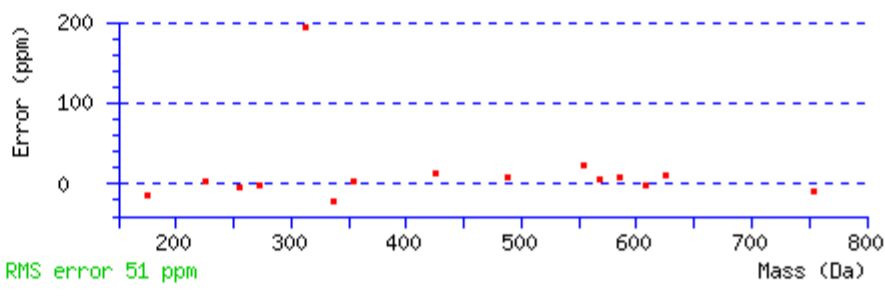

NCBI BLAST search of [SHEAEAEPSEPR](#)

(Parameters: blastp, nr protein database, expect=20000, no filter, PAM30)

Other BLAST [web gateways](#)

### All matches to this query

| Score | $M_r(\text{calc})$ : | Delta    | Sequence                       |
|-------|----------------------|----------|--------------------------------|
| 49.8  | 1337.584732          | 0.001430 | <a href="#">SHEAEAEPSEPR</a>   |
| 0.2   | 1337.584778          | 0.001384 | <a href="#">SPSPAGGGSSPYSR</a> |

# **MATRIX** SCIENCE Mascot Search Results

## Peptide View

### MS/MS Fragmentation of **TPLYDLR**

Found in **MEMO1\_HUMAN**, Protein MEMO1 OS=Homo sapiens GN=MEMO1 PE=1 SV=1

Match to Query 6129: 876.463528 from(439.239040,2+) rtinseconds(2126) index(24973)  
 Title: Locus:1.1.1.2153.4  
 Data file 2011-11-10 - TFD - EP 3-4.mgf

Click mouse within plot area to zoom in by factor of two about that point

Or, Plot from  to  Da   
 Label all possible matches  Label matches used for scoring

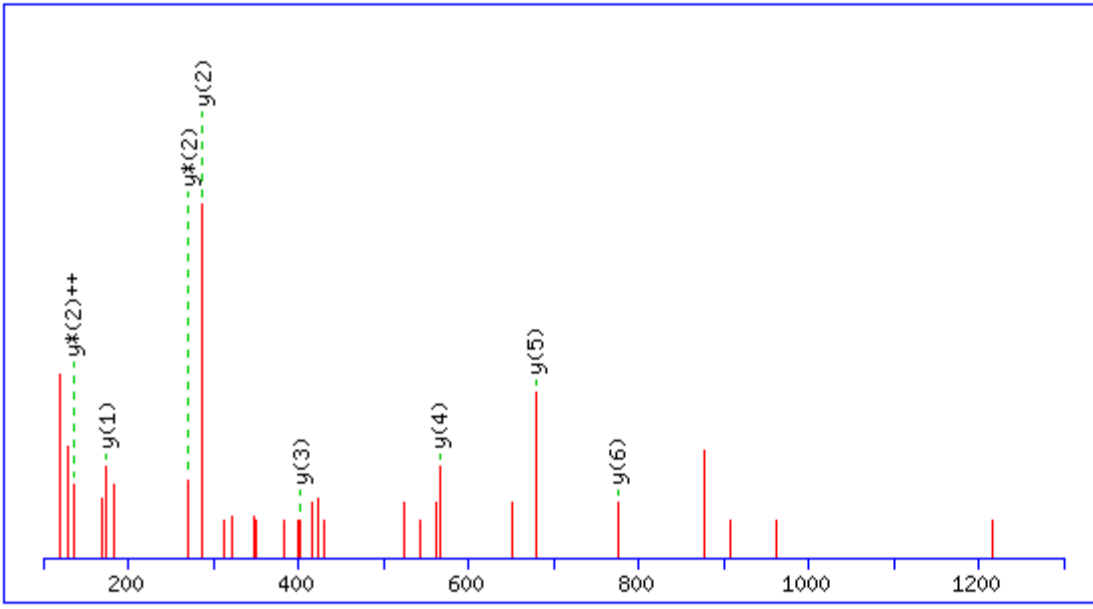

Monoisotopic mass of neutral peptide Mr(calc): 876.470505

Fixed modifications: Propionamide (C) (apply to specified residues or termini only)

Ions Score: 32 Expect: 0.0072

Matches : 8/56 fragment ions using 25 most intense peaks [\(help\)](#)

| # | b          | b <sup>++</sup> | b <sup>0</sup> | b <sup>0++</sup> | Seq. | y                 | y <sup>++</sup> | y <sup>*</sup>    | y <sup>*++</sup>  | y <sup>0</sup> | y <sup>0++</sup> | # |
|---|------------|-----------------|----------------|------------------|------|-------------------|-----------------|-------------------|-------------------|----------------|------------------|---|
| 1 | 102.054955 | 51.531116       | 84.044390      | 42.525833        | T    |                   |                 |                   |                   |                |                  | 7 |
| 2 | 199.107719 | 100.057497      | 181.097154     | 91.052215        | P    | <b>776.430116</b> | 388.718696      | 759.403567        | 380.205422        | 758.419551     | 379.713414       | 6 |
| 3 | 312.191783 | 156.599529      | 294.181218     | 147.594247       | L    | <b>679.377352</b> | 340.192314      | 662.350803        | 331.679039        | 661.366787     | 331.187031       | 5 |
| 4 | 475.255112 | 238.131194      | 457.244547     | 229.125912       | Y    | <b>566.293288</b> | 283.650282      | 549.266739        | 275.137008        | 548.282723     | 274.645000       | 4 |
| 5 | 590.282055 | 295.644666      | 572.271490     | 286.639383       | D    | <b>403.229959</b> | 202.118617      | 386.203410        | 193.605343        | 385.219394     | 193.113335       | 3 |
| 6 | 703.366119 | 352.186698      | 685.355554     | 343.181415       | L    | <b>288.203016</b> | 144.605146      | <b>271.176467</b> | <b>136.091871</b> |                |                  | 2 |
| 7 |            |                 |                |                  | R    | <b>175.118952</b> | 88.063114       | 158.092403        | 79.549839         |                |                  | 1 |

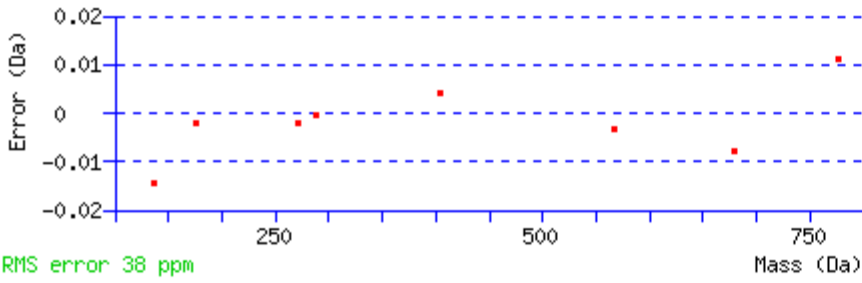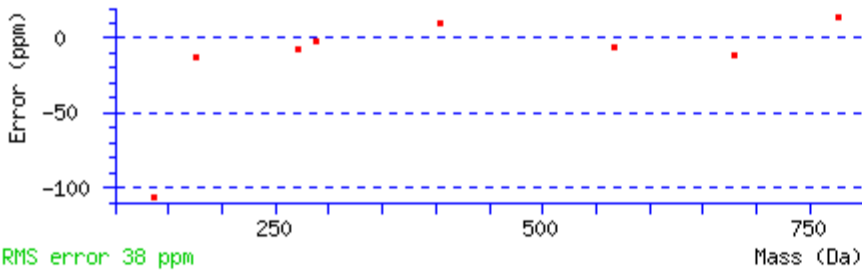

### NCBI BLAST search of **TPLYDLR**

(Parameters: blastp, nr protein database, expect=20000, no filter, PAM30)

Other BLAST [web gateways](#)

### All matches to this query

| Score | Mr(calc):  | Delta     | Sequence                 |
|-------|------------|-----------|--------------------------|
| 32.1  | 876.470505 | -0.006977 | <a href="#">TPLYDLR</a>  |
| 8.6   | 876.459946 | 0.003582  | <a href="#">TNMARIR</a>  |
| 7.4   | 876.470490 | -0.006962 | <a href="#">AFEIELR</a>  |
| 7.2   | 876.470505 | -0.006977 | <a href="#">FLPSELR</a>  |
| 4.1   | 876.470490 | -0.006962 | <a href="#">AYLPLER</a>  |
| 0.4   | 876.467331 | -0.003803 | <a href="#">CLKCLR</a>   |
| 0.2   | 876.459946 | 0.003582  | <a href="#">GASMRSLR</a> |
| 0.1   | 876.455231 | 0.008297  | <a href="#">SLSEDAKK</a> |
| 0.1   | 876.462677 | 0.000851  | <a href="#">VVVVESVM</a> |



# MASCOT SCIENCE Mascot Search Results

## Peptide View

MS/MS Fragmentation of **LAVSSLLR**

Found in **MON2\_HUMAN**, Protein MON2 homolog OS=Homo sapiens GN=MON2 PE=1 SV=2

Match to Query 4456: 857.533808 from(429.774180,2+) rtinseconds(2755) index(35663)

Title: Locus:1.1.1.2484.4

Data file 2011-11-14 - TFD - EP 7-1.mgf

Click mouse within plot area to zoom in by factor of two about that point

Or, Plot from  to  Da

Label all possible matches  Label matches used for scoring

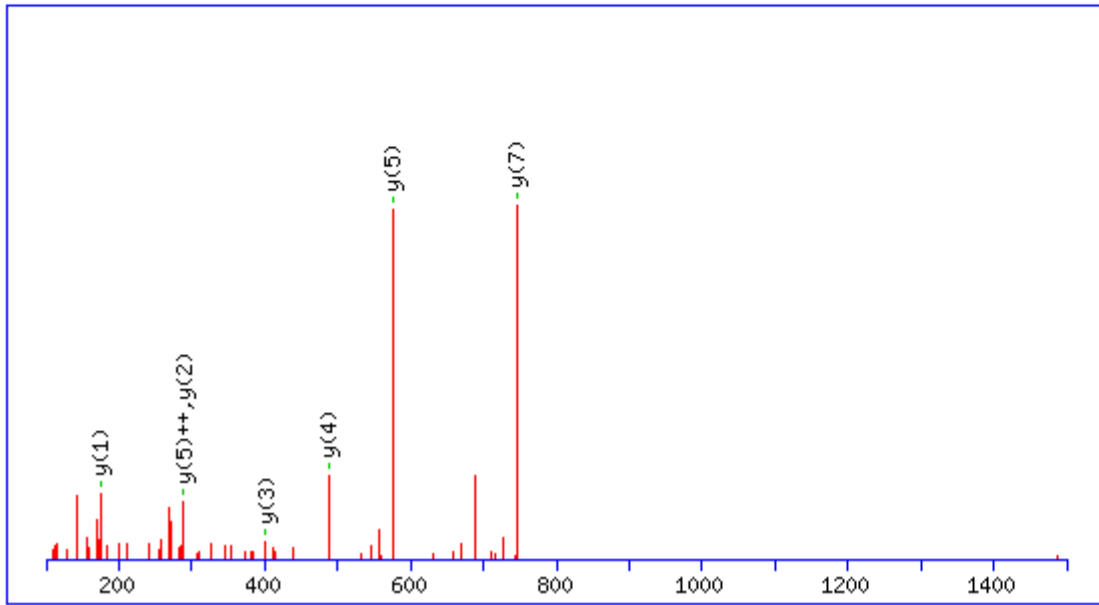

Monoisotopic mass of neutral peptide Mr(calc): 857.533432

Fixed modifications: Propionamide (C) (apply to specified residues or termini only)

Ions Score: 62 Expect: 3.3e-006

Matches : 7/58 fragment ions using 7 most intense peaks [\(help\)](#)

| # | b          | b <sup>++</sup> | b <sup>0</sup> | b <sup>0++</sup> | Seq. | y          | y <sup>++</sup> | y <sup>*</sup> | y <sup>*++</sup> | y <sup>0</sup> | y <sup>0++</sup> | # |
|---|------------|-----------------|----------------|------------------|------|------------|-----------------|----------------|------------------|----------------|------------------|---|
| 1 | 114.091340 | 57.549308       |                |                  | L    |            |                 |                |                  |                |                  | 8 |
| 2 | 185.128454 | 93.067865       |                |                  | A    | 745.456664 | 373.231970      | 728.430115     | 364.718696       | 727.446099     | 364.226688       | 7 |
| 3 | 284.196868 | 142.602072      |                |                  | V    | 674.419550 | 337.713413      | 657.393001     | 329.200139       | 656.408985     | 328.708131       | 6 |
| 4 | 371.228896 | 186.118086      | 353.218331     | 177.112804       | S    | 575.351136 | 288.179206      | 558.324587     | 279.665932       | 557.340571     | 279.173924       | 5 |
| 5 | 458.260924 | 229.634100      | 440.250359     | 220.628818       | S    | 488.319108 | 244.663192      | 471.292559     | 236.149918       | 470.308543     | 235.657910       | 4 |
| 6 | 571.344988 | 286.176132      | 553.334423     | 277.170850       | L    | 401.287080 | 201.147178      | 384.260531     | 192.633904       |                |                  | 3 |
| 7 | 684.429052 | 342.718164      | 666.418487     | 333.712882       | L    | 288.203016 | 144.605146      | 271.176467     | 136.091872       |                |                  | 2 |
| 8 |            |                 |                |                  | R    | 175.118952 | 88.063114       | 158.092403     | 79.549840        |                |                  | 1 |

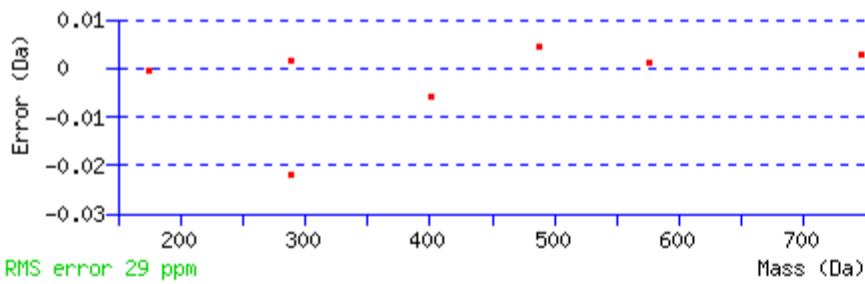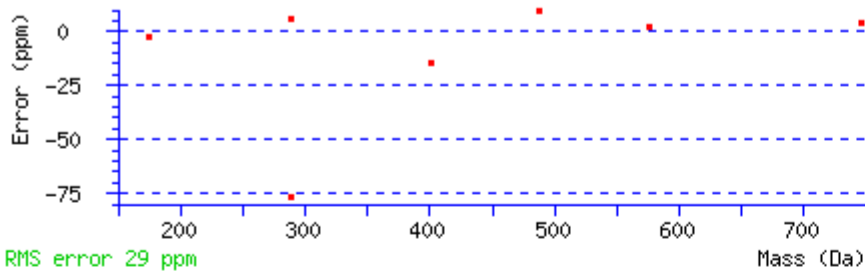

NCBI BLAST search of **LAVSSLLR**

(Parameters: blastp, nr protein database, expect=20000, no filter, PAM30)

Other BLAST [web gateways](#)

## All matches to this query

| Score | Mr(calc):  | Delta    | Sequence                 |
|-------|------------|----------|--------------------------|
| 83.9  | 857.533432 | 0.000376 | <a href="#">LGISSLIR</a> |
| 61.9  | 857.533432 | 0.000376 | <a href="#">LAVSSLLR</a> |
| 26.3  | 857.533432 | 0.000376 | <a href="#">IEKTVIR</a>  |
| 22.3  | 857.533417 | 0.000391 | <a href="#">EIKSLLR</a>  |
| 22.3  | 857.533417 | 0.000391 | <a href="#">EKLSLIR</a>  |
| 18.2  | 857.533432 | 0.000376 | <a href="#">LVALLSSR</a> |
| 13.9  | 857.533417 | 0.000391 | <a href="#">LLSKELR</a>  |
| 13.2  | 857.533432 | 0.000376 | <a href="#">IKTVELR</a>  |
| 13.2  | 857.533417 | 0.000391 | <a href="#">LELSKLR</a>  |
| 13.2  | 857.533432 | 0.000376 | <a href="#">LKVTEL R</a> |

# MASCOT Search Results

## Peptide View

MS/MS Fragmentation of **LDPTQTSFLK**

Found in **NDRG2\_HUMAN**, Protein NDRG2 OS=Homo sapiens GN=NDRG2 PE=1 SV=2

Match to Query 26306: 1148.610288 from(575.312420,2+) rtinseconds(2323) index(28165)

Title: Locus:1.1.1.2301.29

Data file 2011-11-12 - TFD - EP 5-4.mgf

Click mouse within plot area to zoom in by factor of two about that point

Or, Plot from  to  Da

Label all possible matches  Label matches used for scoring

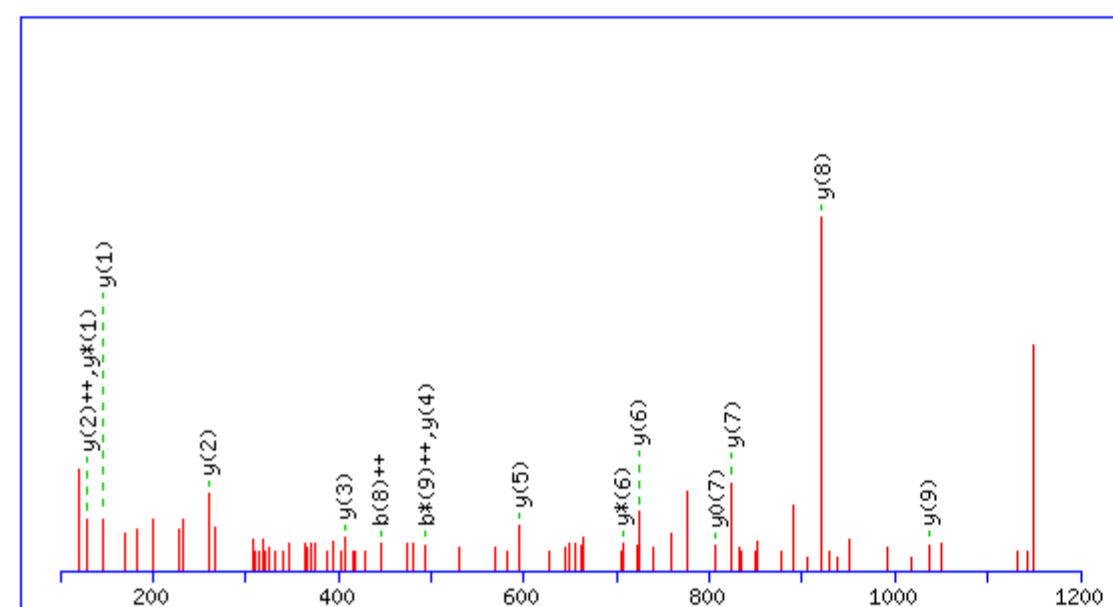

Monoisotopic mass of neutral peptide Mr(calc): 1148.607742

Fixed modifications: Propionamide (C) (apply to specified residues or termini only)

Ions Score: 45 Expect: 0.00035

Matches : 15/92 fragment ions using 40 most intense peaks [\(help\)](#)

| #  | b           | b <sup>++</sup>   | b <sup>*</sup> | b <sup>*++</sup>  | b <sup>0</sup> | b <sup>0++</sup> | Seq. | y                  | y <sup>++</sup>   | y <sup>*</sup>    | y <sup>*++</sup> | y <sup>0</sup>    | y <sup>0++</sup> | #  |
|----|-------------|-------------------|----------------|-------------------|----------------|------------------|------|--------------------|-------------------|-------------------|------------------|-------------------|------------------|----|
| 1  | 114.091340  | 57.549308         |                |                   |                |                  | L    |                    |                   |                   |                  |                   |                  | 10 |
| 2  | 229.118283  | 115.062779        |                |                   | 211.107718     | 106.057497       | D    | <b>1036.530953</b> | 518.769115        | 1019.504404       | 510.255840       | 1018.520388       | 509.763832       | 9  |
| 3  | 326.171047  | 163.589161        |                |                   | 308.160482     | 154.583879       | P    | <b>921.504010</b>  | 461.255643        | 904.477461        | 452.742369       | 903.493445        | 452.250361       | 8  |
| 4  | 427.218726  | 214.113001        |                |                   | 409.208161     | 205.107719       | T    | <b>824.451246</b>  | 412.729261        | 807.424697        | 404.215987       | <b>806.440681</b> | 403.723979       | 7  |
| 5  | 555.277304  | 278.142290        | 538.250755     | 269.629016        | 537.266739     | 269.137008       | Q    | <b>723.403567</b>  | 362.205422        | <b>706.377018</b> | 353.692147       | 705.393002        | 353.200139       | 6  |
| 6  | 656.324983  | 328.666130        | 639.298434     | 320.152855        | 638.314418     | 319.660847       | T    | <b>595.344989</b>  | 298.176133        | 578.318440        | 289.662858       | 577.334424        | 289.170850       | 5  |
| 7  | 743.357011  | 372.182144        | 726.330462     | 363.668869        | 725.346446     | 363.176861       | S    | <b>494.297310</b>  | 247.652293        | 477.270761        | 239.139018       | 476.286745        | 238.647010       | 4  |
| 8  | 890.425425  | <b>445.716351</b> | 873.398876     | 437.203076        | 872.414860     | 436.711068       | F    | <b>407.265282</b>  | 204.136279        | 390.238733        | 195.623004       |                   |                  | 3  |
| 9  | 1003.509489 | 502.258383        | 986.482940     | <b>493.745108</b> | 985.498924     | 493.253100       | L    | <b>260.196868</b>  | <b>130.602072</b> | 243.170319        | 122.088798       |                   |                  | 2  |
| 10 |             |                   |                |                   |                |                  | K    | <b>147.112804</b>  | 74.060040         | <b>130.086255</b> | 65.546765        |                   |                  | 1  |

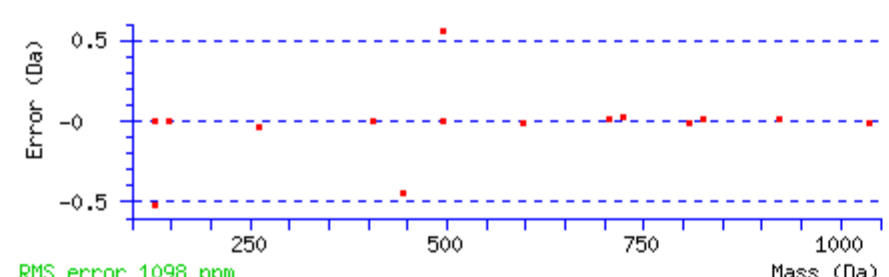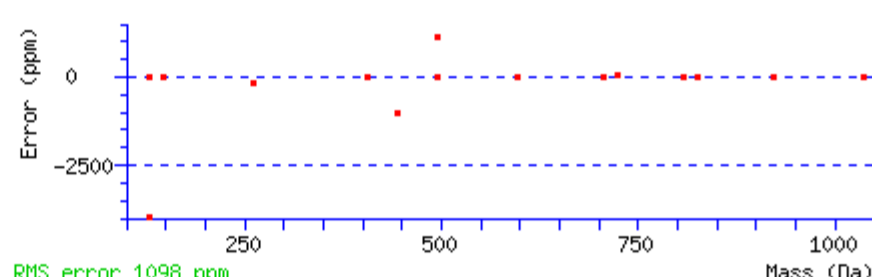

NCBI BLAST search of **LDPTQTSFLK**

(Parameters: blastp, nr protein database, expect=20000, no filter, PAM30)

Other BLAST [web gateways](#)

All matches to this query

| Score | Mr(calc):   | Delta     | Sequence                    |
|-------|-------------|-----------|-----------------------------|
| 44.9  | 1148.607742 | 0.002546  | <a href="#">LDPTQTSFLK</a>  |
| 16.7  | 1148.607727 | 0.002561  | <a href="#">LLFDQDASLK</a>  |
| 7.6   | 1148.607727 | 0.002561  | <a href="#">LVNEVTEFAK</a>  |
| 4.8   | 1148.604553 | 0.005735  | <a href="#">LMMNLLRDK</a>   |
| 3.7   | 1148.611115 | -0.000827 | <a href="#">LLVTASMPGTK</a> |
| 3.2   | 1148.618958 | -0.008670 | <a href="#">IQRETDFLK</a>   |
| 3.0   | 1148.607727 | 0.002561  | <a href="#">IISPSFDNIK</a>  |
| 2.8   | 1148.619812 | -0.009524 | <a href="#">MLLLCRWK</a>    |
| 2.3   | 1148.607712 | 0.002576  | <a href="#">EQLYTPASLK</a>  |
| 1.3   | 1148.603699 | 0.006589  | <a href="#">SQSSSVLINK</a>  |

Mascot: <http://www.matrixscience.com/>

# **MASCOT** Mascot Search Results

## Peptide View

MS/MS Fragmentation of **QYDYDSSTIR**

Found in **NIBAN\_HUMAN**, Protein Niban OS=Homo sapiens GN=FAM129A PE=1 SV=1

Match to Query 577512: 1246.553828 from(624.284190,2+) rtinseconds(1637) index(504972)

Title: Locus:1.1.1.953.30

Data file C:\Program Files (x86)\Matrix Science\Mascot Daemon\mgf3 TFD - Epitel - R2\mascot\_daemon\_merge.mgf

Click mouse within plot area to zoom in by factor of two about that point

Or, Plot from  to  Da

Label all possible matches  Label matches used for scoring

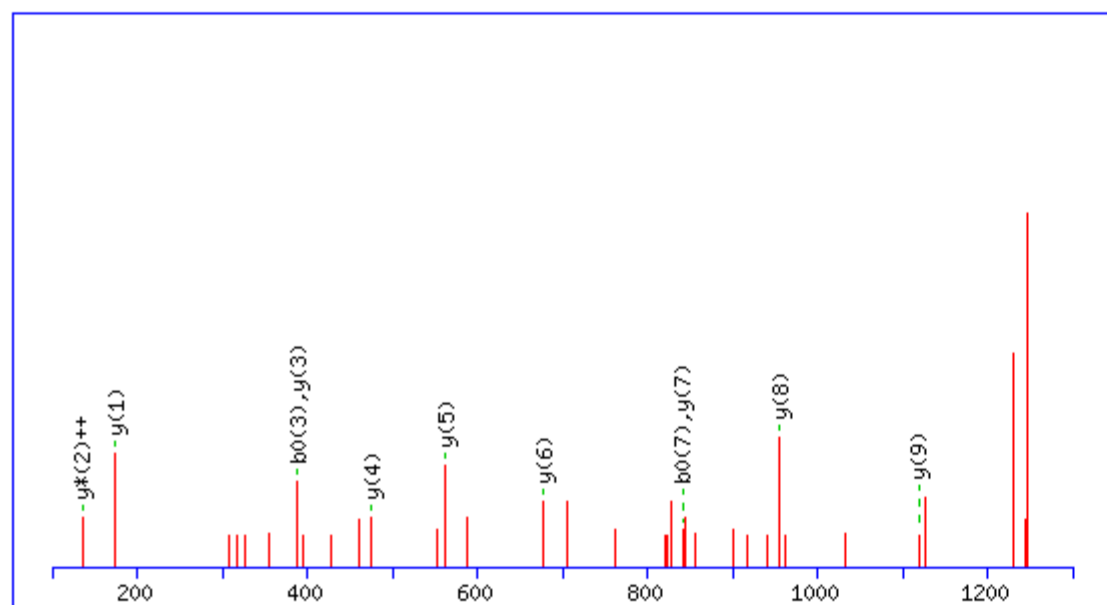

Monoisotopic mass of neutral peptide Mr(calc): 1246.546585

Fixed modifications: Carbamidomethyl (C) (apply to specified residues or termini only)

Ions Score: 50 Expect: 6e-005

Matches : 11/100 fragment ions using 22 most intense peaks ([help](#))

| #  | b           | b <sup>++</sup> | b <sup>*</sup> | b <sup>*++</sup> | b <sup>0</sup>    | b <sup>0++</sup> | Seq. | y                  | y <sup>++</sup> | y <sup>*</sup> | y <sup>*++</sup>  | y <sup>0</sup> | y <sup>0++</sup> | #  |
|----|-------------|-----------------|----------------|------------------|-------------------|------------------|------|--------------------|-----------------|----------------|-------------------|----------------|------------------|----|
| 1  | 129.065854  | 65.036565       | 112.039305     | 56.523291        |                   |                  | Q    |                    |                 |                |                   |                |                  | 10 |
| 2  | 292.129183  | 146.568230      | 275.102634     | 138.054955       |                   |                  | Y    | <b>1119.495295</b> | 560.251285      | 1102.468746    | 551.738011        | 1101.484730    | 551.246003       | 9  |
| 3  | 407.156126  | 204.081701      | 390.129577     | 195.568427       | <b>389.145561</b> | 195.076419       | D    | <b>956.431966</b>  | 478.719621      | 939.405417     | 470.206347        | 938.421401     | 469.714339       | 8  |
| 4  | 570.219455  | 285.613366      | 553.192906     | 277.100091       | 552.208890        | 276.608083       | Y    | <b>841.405023</b>  | 421.206150      | 824.378474     | 412.692875        | 823.394458     | 412.200867       | 7  |
| 5  | 685.246398  | 343.126837      | 668.219849     | 334.613563       | 667.235833        | 334.121555       | D    | <b>678.341694</b>  | 339.674485      | 661.315145     | 331.161210        | 660.331129     | 330.669202       | 6  |
| 6  | 772.278426  | 386.642851      | 755.251877     | 378.129577       | 754.267861        | 377.637569       | S    | <b>563.314751</b>  | 282.161014      | 546.288202     | 273.647739        | 545.304186     | 273.155731       | 5  |
| 7  | 859.310454  | 430.158865      | 842.283905     | 421.645591       | <b>841.299889</b> | 421.153583       | S    | <b>476.282723</b>  | 238.644999      | 459.256174     | 230.131725        | 458.272158     | 229.639717       | 4  |
| 8  | 960.358133  | 480.682705      | 943.331584     | 472.169430       | 942.347568        | 471.677422       | T    | <b>389.250695</b>  | 195.128985      | 372.224146     | 186.615711        | 371.240130     | 186.123703       | 3  |
| 9  | 1073.442197 | 537.224737      | 1056.415648    | 528.711462       | 1055.431632       | 528.219454       | I    | 288.203016         | 144.605146      | 271.176467     | <b>136.091871</b> |                |                  | 2  |
| 10 |             |                 |                |                  |                   |                  | R    | <b>175.118952</b>  | 88.063114       | 158.092403     | 79.549839         |                |                  | 1  |

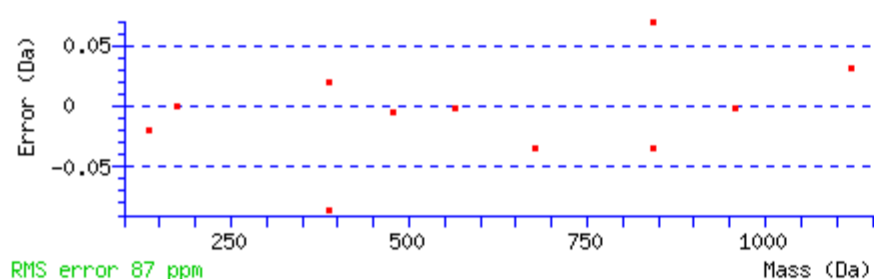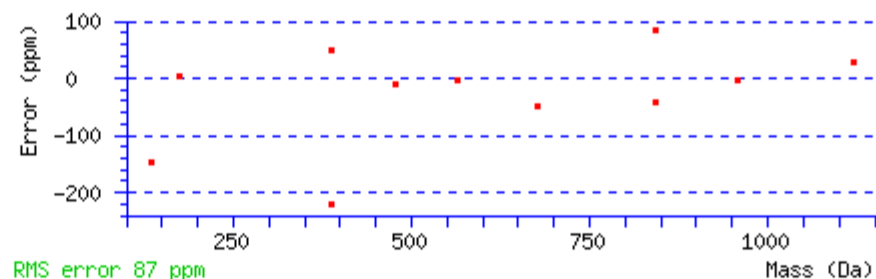

NCBI BLAST search of **QYDYDSSTIR**

(Parameters: blastp, nr protein database, expect=20000, no filter, PAM30)

Other BLAST [web gateways](#)

## All matches to this query

| Score | Mr(calc):   | Delta     | Sequence                   |
|-------|-------------|-----------|----------------------------|
| 49.7  | 1246.546585 | 0.007243  | <a href="#">QYDYDSSTIR</a> |
| 4.6   | 1246.565201 | -0.011373 | <a href="#">IQTYAEYMGR</a> |

Mascot: <http://www.matrixscience.com/>

# MASCOT Search Results

## Peptide View

MS/MS Fragmentation of **GWDENVYYTVPLVR**

Found in **NIPSI\_HUMAN**, Protein NipSnap homolog 1 OS=Homo sapiens GN=NIPSNAP1 PE=1 SV=1

Match to Query 52412: 1709.845208 from(855.929880,2+) rtinseconds(3349) index(46346)

Title: Locus:1.1.1.2596.34

Data file 2011-11-14 - TFD - EP 8-5.mgf

Click mouse within plot area to zoom in by factor of two about that point

Or, Plot from  to  Da

Label all possible matches  Label matches used for scoring

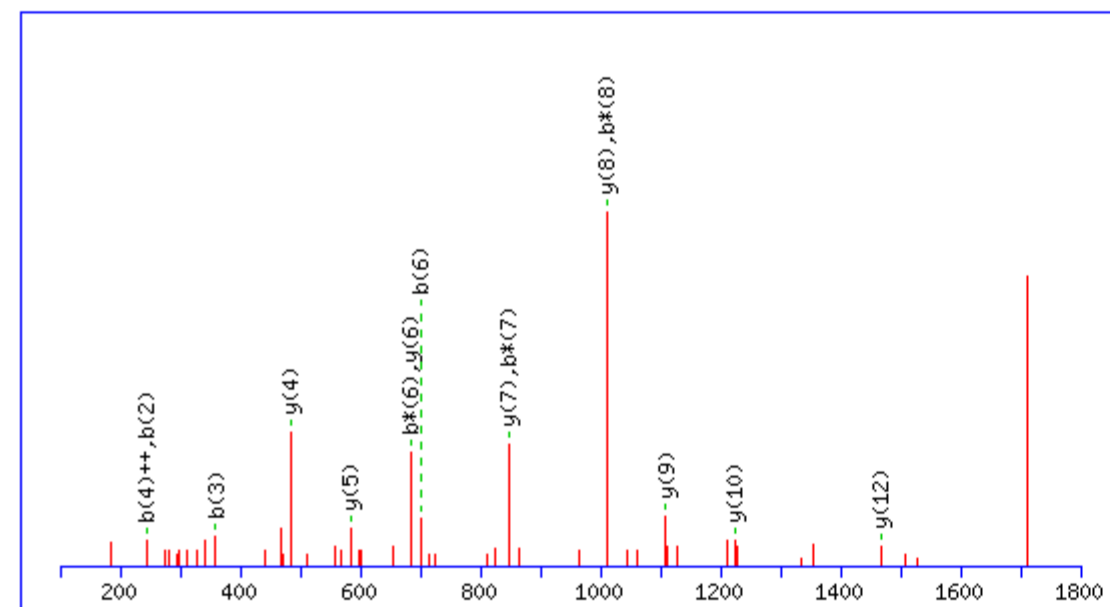

Monoisotopic mass of neutral peptide  $M_r(\text{calc})$ : 1709.841324

Fixed modifications: Propionamide (C) (apply to specified residues or termini only)

Ions Score: 67 Expect: 2.3e-006

Matches : 15/134 fragment ions using 14 most intense peaks ([help](#))

| #  | b                 | b <sup>++</sup>   | b <sup>+</sup>     | b <sup>+++</sup> | b <sup>0</sup> | b <sup>0++</sup> | Seq. | y                  | y <sup>++</sup> | y <sup>+</sup> | y <sup>+++</sup> | y <sup>0</sup> | y <sup>0++</sup> | #  |
|----|-------------------|-------------------|--------------------|------------------|----------------|------------------|------|--------------------|-----------------|----------------|------------------|----------------|------------------|----|
| 1  | 58.028740         | 29.518008         |                    |                  |                |                  | G    |                    |                 |                |                  |                |                  | 14 |
| 2  | <b>244.108053</b> | 122.557665        |                    |                  |                |                  | W    | 1653.827135        | 827.417206      | 1636.800586    | 818.903931       | 1635.816570    | 818.411923       | 13 |
| 3  | <b>359.134996</b> | 180.071136        |                    |                  | 341.124431     | 171.065854       | D    | <b>1467.747822</b> | 734.377549      | 1450.721273    | 725.864275       | 1449.737257    | 725.372267       | 12 |
| 4  | 488.177589        | <b>244.592433</b> |                    |                  | 470.167024     | 235.587150       | E    | 1352.720879        | 676.864078      | 1335.694330    | 668.350803       | 1334.710314    | 667.858795       | 11 |
| 5  | 602.220516        | 301.613896        | 585.193967         | 293.100622       | 584.209951     | 292.608614       | N    | <b>1223.678286</b> | 612.342781      | 1206.651737    | 603.829507       | 1205.667721    | 603.337499       | 10 |
| 6  | <b>701.288930</b> | 351.148103        | <b>684.262381</b>  | 342.634829       | 683.278365     | 342.142821       | V    | <b>1109.635359</b> | 555.321318      | 1092.608810    | 546.808043       | 1091.624794    | 546.316035       | 9  |
| 7  | 864.352259        | 432.679768        | <b>847.325710</b>  | 424.166493       | 846.341694     | 423.674485       | Y    | <b>1010.566945</b> | 505.787111      | 993.540396     | 497.273836       | 992.556380     | 496.781828       | 8  |
| 8  | 1027.415588       | 514.211432        | <b>1010.389039</b> | 505.698158       | 1009.405023    | 505.206150       | Y    | <b>847.503616</b>  | 424.255446      | 830.477067     | 415.742172       | 829.493051     | 415.250164       | 7  |
| 9  | 1128.463267       | 564.735272        | 1111.436718        | 556.221997       | 1110.452702    | 555.729989       | T    | <b>684.440287</b>  | 342.723782      | 667.413738     | 334.210507       | 666.429722     | 333.718499       | 6  |
| 10 | 1227.531681       | 614.269479        | 1210.505132        | 605.756204       | 1209.521116    | 605.264196       | V    | <b>583.392608</b>  | 292.199942      | 566.366059     | 283.686668       |                |                  | 5  |
| 11 | 1324.584445       | 662.795861        | 1307.557896        | 654.282586       | 1306.573880    | 653.790578       | P    | <b>484.324194</b>  | 242.665735      | 467.297645     | 234.152460       |                |                  | 4  |
| 12 | 1437.668509       | 719.337893        | 1420.641960        | 710.824618       | 1419.657944    | 710.332610       | L    | 387.271430         | 194.139353      | 370.244881     | 185.626078       |                |                  | 3  |
| 13 | 1536.736923       | 768.872100        | 1519.710374        | 760.358825       | 1518.726358    | 759.866817       | V    | 274.187366         | 137.597321      | 257.160817     | 129.084047       |                |                  | 2  |
| 14 |                   |                   |                    |                  |                |                  | R    | 175.118952         | 88.063114       | 158.092403     | 79.549839        |                |                  | 1  |

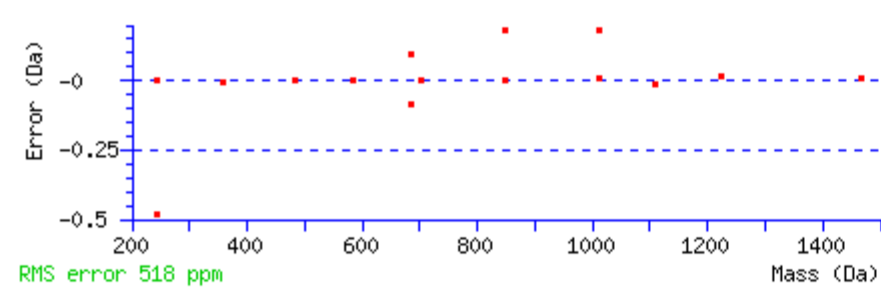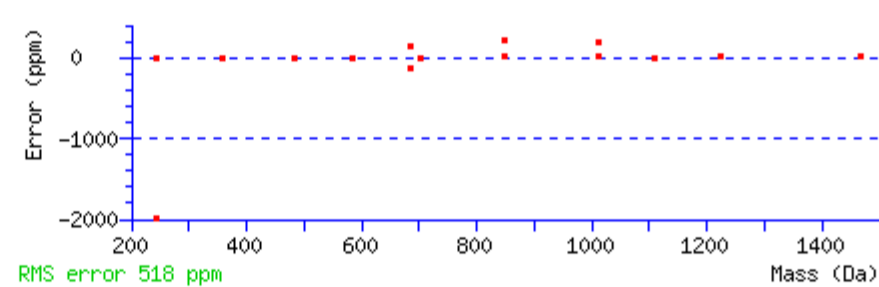

NCBI BLAST search of [GWDENVYYTVPLVR](#)

(Parameters: blastp, nr protein database, expect=20000, no filter, PAM30)

Other BLAST [web gateways](#)

All matches to this query

| Score | $M_r(\text{calc})$ : | Delta     | Sequence                         |
|-------|----------------------|-----------|----------------------------------|
| 66.8  | 1709.841324          | 0.003884  | <a href="#">GWDENVYYTVPLVR</a>   |
| 2.6   | 1709.840652          | 0.004556  | <a href="#">FVKINNSTNEGMMNVK</a> |
| 2.5   | 1709.851425          | -0.006217 | <a href="#">LRALMDMMGGVLEVK</a>  |

Mascot: <http://www.matrixscience.com/>

# **MATRIX** SCIENCE Mascot Search Results

## Peptide View

### MS/MS Fragmentation of **LFLPLSR**

Found in **NLRC3\_HUMAN**, Protein NLRC3 OS=Homo sapiens GN=NLRC3 PE=2 SV=2

Match to Query 3266: 844.514668 from(423.264610,2+) rtinseconds(1954) index(16943)

Title: Locus:1.1.1.2367.7

Data file 2011-11-10 - TFD - EP 3-5.mgf

Click mouse within plot area to zoom in by factor of two about that point

Or, Plot from  to  Da

Label all possible matches  Label matches used for scoring

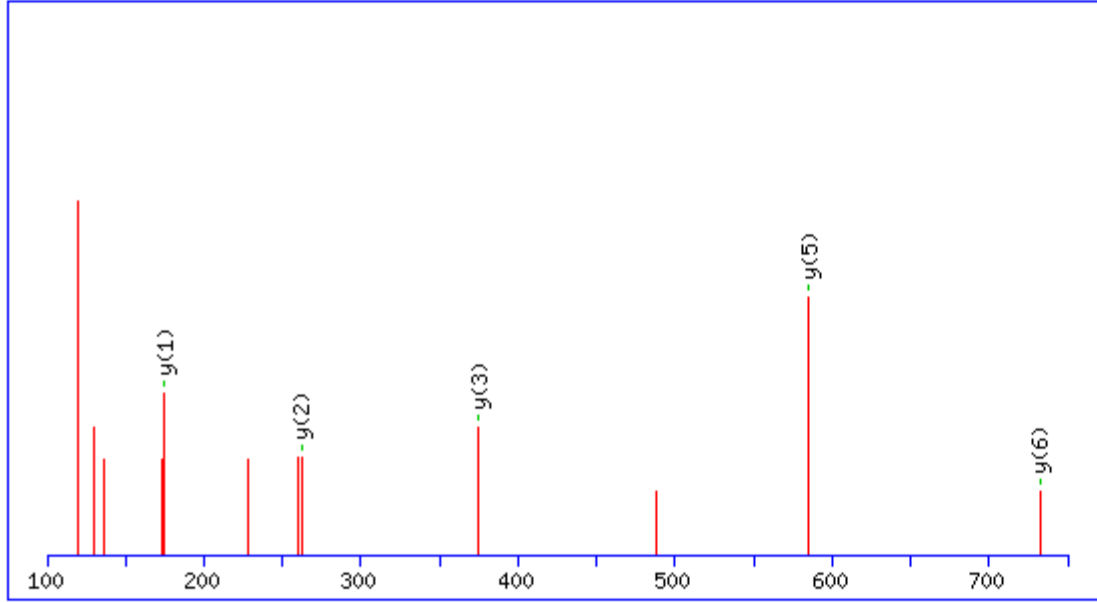

Monoisotopic mass of neutral peptide Mr(calc): 844.517059

Fixed modifications: Propionamide (C) (apply to specified residues or termini only)

Ions Score: 39 Expect: 0.00068

Matches : 5/48 fragment ions using 8 most intense peaks ([help](#))

| # | b          | b <sup>++</sup> | b <sup>0</sup> | b <sup>0++</sup> | Seq. | y                 | y <sup>++</sup> | y <sup>*</sup> | y <sup>*++</sup> | y <sup>0</sup> | y <sup>0++</sup> | # |
|---|------------|-----------------|----------------|------------------|------|-------------------|-----------------|----------------|------------------|----------------|------------------|---|
| 1 | 114.091340 | 57.549308       |                |                  | L    |                   |                 |                |                  |                |                  | 7 |
| 2 | 261.159754 | 131.083515      |                |                  | F    | <b>732.440286</b> | 366.723781      | 715.413737     | 358.210507       | 714.429721     | 357.718499       | 6 |
| 3 | 374.243818 | 187.625547      |                |                  | L    | <b>585.371872</b> | 293.189574      | 568.345323     | 284.676300       | 567.361307     | 284.184292       | 5 |
| 4 | 471.296582 | 236.151929      |                |                  | P    | 472.287808        | 236.647542      | 455.261259     | 228.134268       | 454.277243     | 227.642260       | 4 |
| 5 | 584.380646 | 292.693961      |                |                  | L    | <b>375.235044</b> | 188.121160      | 358.208495     | 179.607886       | 357.224479     | 179.115878       | 3 |
| 6 | 671.412674 | 336.209975      | 653.402109     | 327.204693       | S    | <b>262.150980</b> | 131.579128      | 245.124431     | 123.065854       | 244.140415     | 122.573846       | 2 |
| 7 |            |                 |                |                  | R    | <b>175.118952</b> | 88.063114       | 158.092403     | 79.549840        |                |                  | 1 |

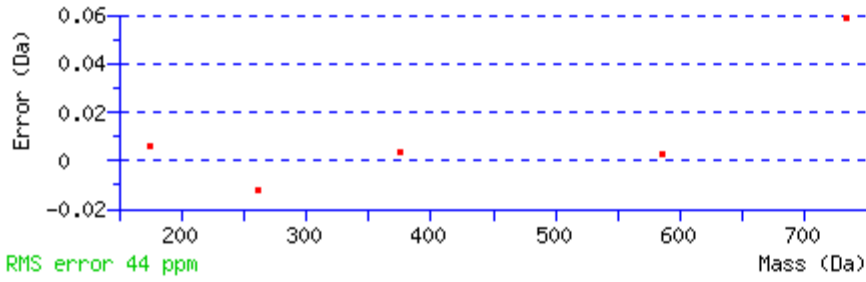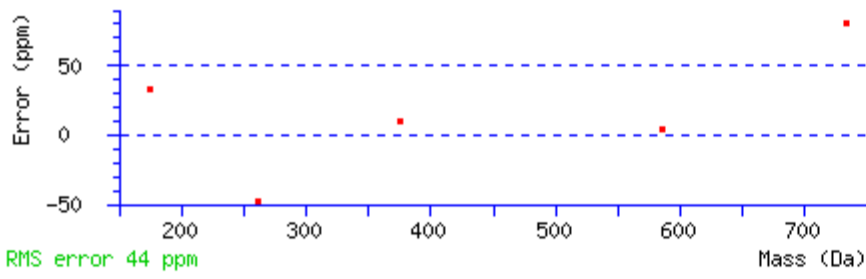

### NCBI BLAST search of **LFLPLSR**

(Parameters: blastp, nr protein database, expect=20000, no filter, PAM30)

Other BLAST [web gateways](#)

### All matches to this query

| Score | Mr(calc):  | Delta     | Sequence                 |
|-------|------------|-----------|--------------------------|
| 39.2  | 844.517059 | -0.002391 | <a href="#">LFLPLSR</a>  |
| 16.8  | 844.509186 | 0.005482  | <a href="#">LILMDLK</a>  |
| 14.6  | 844.509201 | 0.005467  | <a href="#">LMVPLLK</a>  |
| 13.1  | 844.513031 | 0.001637  | <a href="#">LVKAATSR</a> |
| 11.1  | 844.513031 | 0.001637  | <a href="#">LLTKQSR</a>  |
| 10.7  | 844.513016 | 0.001652  | <a href="#">AAIKSLSR</a> |
| 10.7  | 844.513031 | 0.001637  | <a href="#">KTLQLSR</a>  |
| 9.9   | 844.513031 | 0.001637  | <a href="#">IQTLSR</a>   |
| 2.2   | 844.509201 | 0.005467  | <a href="#">LVLPMIK</a>  |
| 0.5   | 844.513031 | 0.001637  | <a href="#">LLTKTNR</a>  |



# MASCOT SCIENCE Mascot Search Results

## Peptide View

MS/MS Fragmentation of **SALSVAPSK**

Found in **QIL1\_HUMAN**, Protein QIL1 OS=Homo sapiens GN=QIL1 PE=1 SV=1

Match to Query 75510: 858.482908 from(430.248730,2+) rtinseconds(1214) index(247819)

Title: Locus:1.1.1.905.3

Data file C:\Program Files (x86)\Matrix Science\Mascot Daemon\mgf3 TFD - Epitel - R2\mascot\_daemon\_merge.mgf

Click mouse within plot area to zoom in by factor of two about that point

Or, Plot from  to  Da

Label all possible matches  Label matches used for scoring

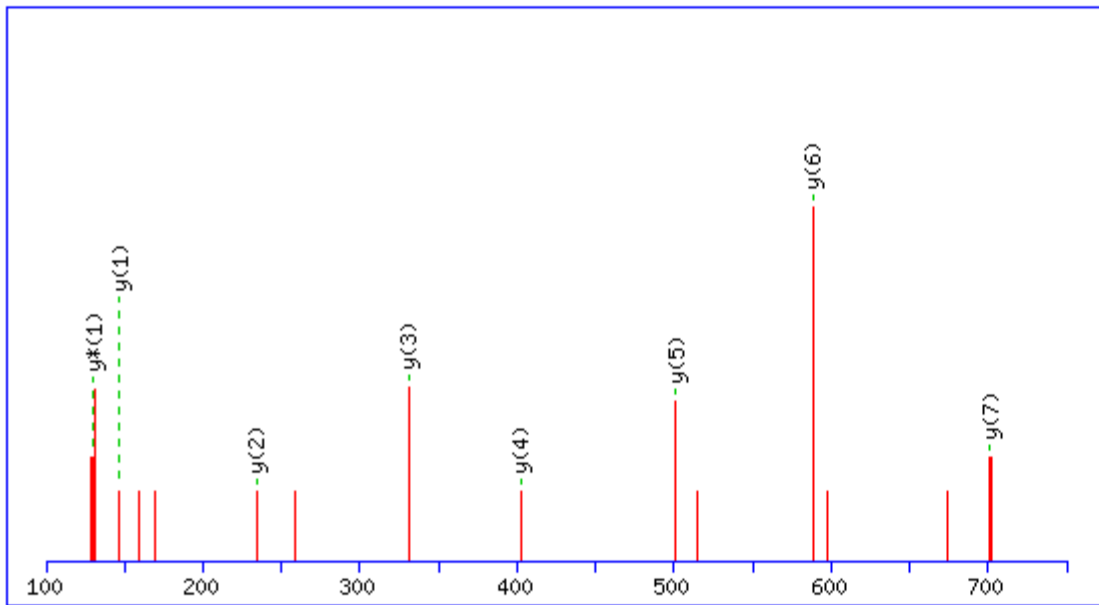

Monoisotopic mass of neutral peptide  $M_r(\text{calc})$ : 858.481064

Fixed modifications: Carbamidomethyl (C) (apply to specified residues or termini only)

Ions Score: 54 Expect: 5.3e-005

Matches : 8/78 fragment ions using 15 most intense peaks ([help](#))

| # | b          | b <sup>++</sup> | b <sup>0</sup> | b <sup>0++</sup> | Seq. | y                 | y <sup>++</sup> | y <sup>*</sup>    | y <sup>*++</sup> | y <sup>0</sup> | y <sup>0++</sup> | # |
|---|------------|-----------------|----------------|------------------|------|-------------------|-----------------|-------------------|------------------|----------------|------------------|---|
| 1 | 88.039304  | 44.523290       | 70.028739      | 35.518008        | S    |                   |                 |                   |                  |                |                  | 9 |
| 2 | 159.076418 | 80.041847       | 141.065853     | 71.036564        | A    | 772.456330        | 386.731803      | 755.429781        | 378.218529       | 754.445765     | 377.726521       | 8 |
| 3 | 272.160482 | 136.583879      | 254.149917     | 127.578597       | L    | <b>701.419216</b> | 351.213246      | 684.392667        | 342.699972       | 683.408651     | 342.207964       | 7 |
| 4 | 359.192510 | 180.099893      | 341.181945     | 171.094611       | S    | <b>588.335152</b> | 294.671214      | 571.308603        | 286.157940       | 570.324587     | 285.665932       | 6 |
| 5 | 458.260924 | 229.634100      | 440.250359     | 220.628818       | V    | <b>501.303124</b> | 251.155200      | 484.276575        | 242.641926       | 483.292559     | 242.149918       | 5 |
| 6 | 529.298038 | 265.152657      | 511.287473     | 256.147375       | A    | <b>402.234710</b> | 201.620993      | 385.208161        | 193.107719       | 384.224145     | 192.615711       | 4 |
| 7 | 626.350802 | 313.679039      | 608.340237     | 304.673757       | P    | <b>331.197596</b> | 166.102436      | 314.171047        | 157.589161       | 313.187031     | 157.097153       | 3 |
| 8 | 713.382830 | 357.195053      | 695.372265     | 348.189771       | S    | <b>234.144832</b> | 117.576054      | 217.118283        | 109.062779       | 216.134267     | 108.570771       | 2 |
| 9 |            |                 |                |                  | K    | <b>147.112804</b> | 74.060040       | <b>130.086255</b> | 65.546765        |                |                  | 1 |

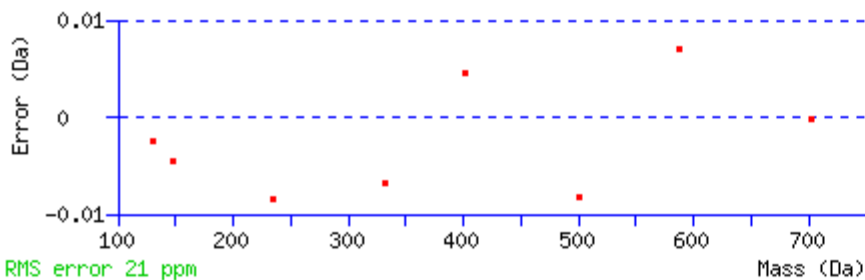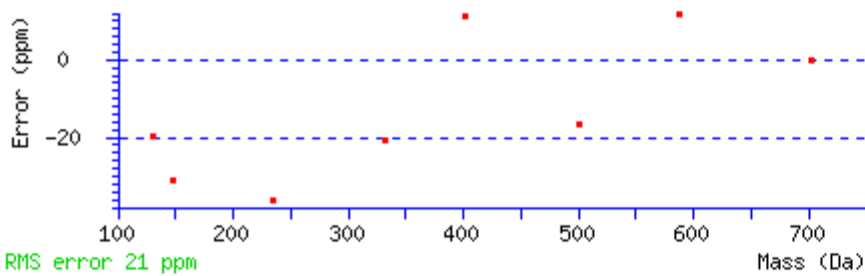

NCBI BLAST search of [SALSVAPSK](#)

(Parameters: blastp, nr protein database, expect=20000, no filter, PAM30)

Other BLAST [web gateways](#)

## All matches to this query

| Score | $M_r(\text{calc})$ : | Delta    | Sequence                  |
|-------|----------------------|----------|---------------------------|
| 54.2  | 858.481064           | 0.001844 | <a href="#">SALSVAPSK</a> |
| 15.7  | 858.481064           | 0.001844 | <a href="#">KGSELTPK</a>  |
| 13.1  | 858.481079           | 0.001829 | <a href="#">GTVIIDNK</a>  |
| 10.8  | 858.481094           | 0.001814 | <a href="#">GTDQVLVK</a>  |
| 10.2  | 858.481079           | 0.001829 | <a href="#">SAVEQVVK</a>  |
| 10.2  | 858.481094           | 0.001814 | <a href="#">GTTGIPGLK</a> |
| 9.7   | 858.481094           | 0.001814 | <a href="#">GITGIVGDK</a> |
| 9.1   | 858.481064           | 0.001844 | <a href="#">KGGELLDK</a>  |
| 7.6   | 858.481064           | 0.001844 | <a href="#">SKPSIPSK</a>  |
| 7.4   | 858.481064           | 0.001844 | <a href="#">TGILQEAK</a>  |

# MASCOT SCIENCE Mascot Search Results

## Peptide View

### MS/MS Fragmentation of **VPGLYVIDSIVR**

Found in **SCAF8\_HUMAN**, Protein SCAF8 OS=Homo sapiens GN=SCAF8 PE=1 SV=1

Match to Query 37728: 1329.765908 from(665.890230,2+) rtinseconds(3646) index(52836)

Title: Locus:1.1.1.2781.14

Data file 2011-11-14 - TFD - EP 8-1.mgf

Click mouse within plot area to zoom in by factor of two about that point

Or, Plot from  to  Da

Label all possible matches  Label matches used for scoring

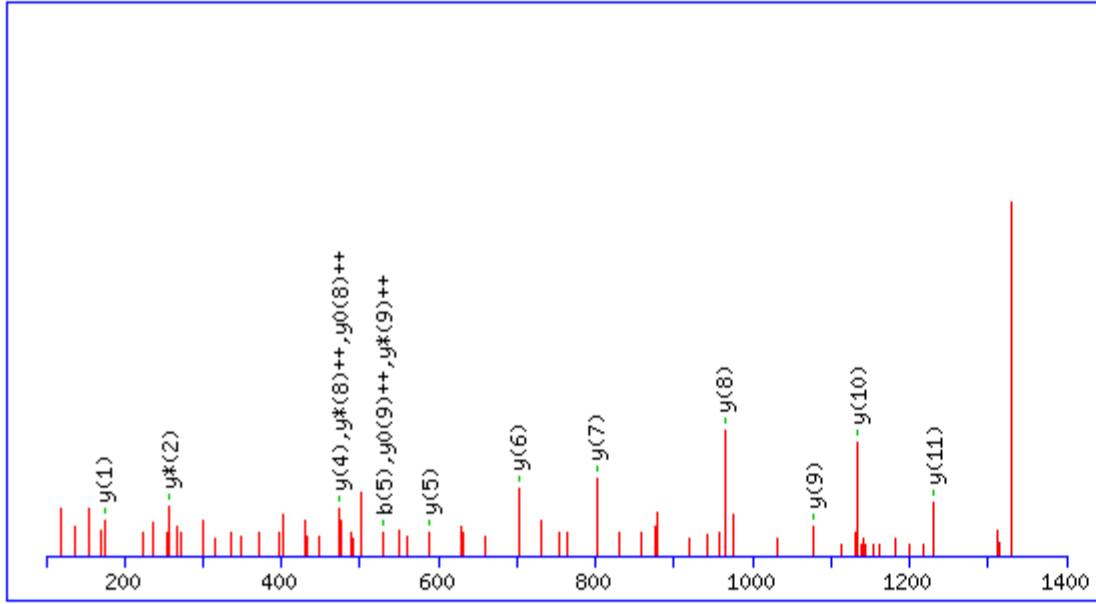

Monoisotopic mass of neutral peptide  $M_r(\text{calc})$ : 1329.765640

Fixed modifications: Propionamide (C) (apply to specified residues or termini only)

Ions Score: 44 Expect: 0.00019

Matches : 15/90 fragment ions using 36 most intense peaks [\(help\)](#)

| #  | b                 | b <sup>++</sup> | b <sup>0</sup> | b <sup>0++</sup> | Seq. | y                  | y <sup>++</sup> | y <sup>*</sup>    | y <sup>*++</sup>  | y <sup>0</sup> | y <sup>0++</sup>  | #  |
|----|-------------------|-----------------|----------------|------------------|------|--------------------|-----------------|-------------------|-------------------|----------------|-------------------|----|
| 1  | 100.075690        | 50.541483       |                |                  | V    |                    |                 |                   |                   |                |                   | 12 |
| 2  | 197.128454        | 99.067865       |                |                  | P    | <b>1231.704500</b> | 616.355888      | 1214.677951       | 607.842613        | 1213.693935    | 607.350605        | 11 |
| 3  | 254.149918        | 127.578597      |                |                  | G    | <b>1134.651736</b> | 567.829506      | 1117.625187       | 559.316232        | 1116.641171    | 558.824224        | 10 |
| 4  | 367.233982        | 184.120629      |                |                  | L    | <b>1077.630272</b> | 539.318774      | 1060.603723       | <b>530.805500</b> | 1059.619707    | <b>530.313491</b> | 9  |
| 5  | <b>530.297311</b> | 265.652294      |                |                  | Y    | <b>964.546208</b>  | 482.776742      | 947.519659        | <b>474.263467</b> | 946.535643     | <b>473.771459</b> | 8  |
| 6  | 629.365725        | 315.186501      |                |                  | V    | <b>801.482879</b>  | 401.245077      | 784.456330        | 392.731803        | 783.472314     | 392.239795        | 7  |
| 7  | 742.449789        | 371.728533      |                |                  | I    | <b>702.414465</b>  | 351.710871      | 685.387916        | 343.197596        | 684.403900     | 342.705588        | 6  |
| 8  | 857.476732        | 429.242004      | 839.466167     | 420.236721       | D    | <b>589.330401</b>  | 295.168838      | 572.303852        | 286.655564        | 571.319836     | 286.163556        | 5  |
| 9  | 944.508760        | 472.758018      | 926.498195     | 463.752735       | S    | <b>474.303458</b>  | 237.655367      | 457.276909        | 229.142092        | 456.292893     | 228.650084        | 4  |
| 10 | 1057.592824       | 529.300050      | 1039.582259    | 520.294767       | I    | 387.271430         | 194.139353      | 370.244881        | 185.626078        |                |                   | 3  |
| 11 | 1156.661238       | 578.834257      | 1138.650673    | 569.828974       | V    | 274.187366         | 137.597321      | <b>257.160817</b> | 129.084047        |                |                   | 2  |
| 12 |                   |                 |                |                  | R    | <b>175.118952</b>  | 88.063114       | 158.092403        | 79.549839         |                |                   | 1  |

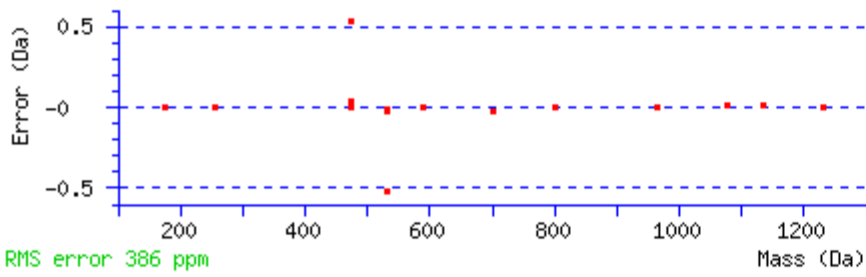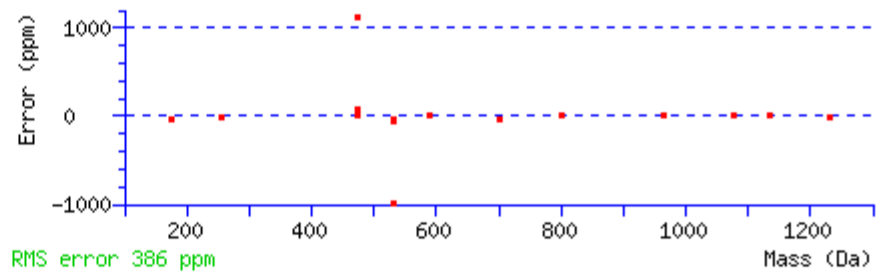

### NCBI BLAST search of **VPGLYVIDSIVR**

(Parameters: blastp, nr protein database, expect=20000, no filter, PAM30)

Other BLAST [web gateways](#)

### All matches to this query

| Score | $M_r(\text{calc})$ : | Delta    | Sequence                     |
|-------|----------------------|----------|------------------------------|
| 44.1  | 1329.765640          | 0.000268 | <a href="#">VPGLYVIDSIVR</a> |

Mascot: <http://www.matrixscience.com/>



# **MATRIX** SCIENCE Mascot Search Results

## Peptide View

MS/MS Fragmentation of **AASQGYTVAR**

Found in **SE1L1\_HUMAN**, Protein sel-1 homolog 1 OS=Homo sapiens GN=SEL1L PE=1 SV=3

Match to Query 19383: 1022.512448 from(512.263500,2+) rtinseconds(1049) index(4227)

Title: Locus:1.1.1.1832.30

Data file 2011-11-14 - TFD - EP 8-2.mgf

Click mouse within plot area to zoom in by factor of two about that point

Or, Plot from  to  Da

Label all possible matches  Label matches used for scoring

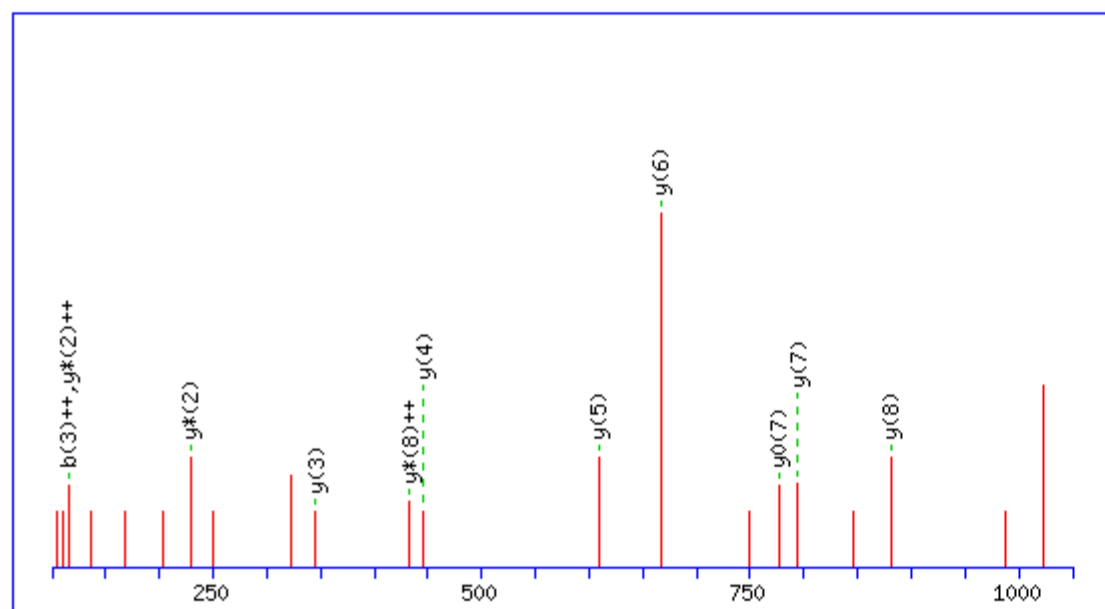

Monoisotopic mass of neutral peptide Mr(calc): 1022.514496

Fixed modifications: Propionamide (C) (apply to specified residues or termini only)

Ions Score: 47 Expect: 0.00027

Matches : 11/92 fragment ions using 15 most intense peaks [\(help\)](#)

| #  | b          | b <sup>++</sup>   | b <sup>*</sup> | b <sup>*++</sup> | b <sup>0</sup> | b <sup>0++</sup> | Seq. | y                 | y <sup>++</sup> | y <sup>*</sup>    | y <sup>*++</sup>  | y <sup>0</sup>    | y <sup>0++</sup> | #  |
|----|------------|-------------------|----------------|------------------|----------------|------------------|------|-------------------|-----------------|-------------------|-------------------|-------------------|------------------|----|
| 1  | 72.044390  | 36.525833         |                |                  |                |                  | A    |                   |                 |                   |                   |                   |                  | 10 |
| 2  | 143.081504 | 72.044390         |                |                  |                |                  | A    | 952.484672        | 476.745974      | 935.458123        | 468.232700        | 934.474107        | 467.740692       | 9  |
| 3  | 230.113532 | <b>115.560404</b> |                |                  | 212.102967     | 106.555121       | S    | <b>881.447558</b> | 441.227417      | 864.421009        | <b>432.714143</b> | 863.436993        | 432.222135       | 8  |
| 4  | 358.172110 | 179.589693        | 341.145561     | 171.076419       | 340.161545     | 170.584411       | Q    | <b>794.415530</b> | 397.711403      | 777.388981        | 389.198129        | <b>776.404965</b> | 388.706121       | 7  |
| 5  | 415.193574 | 208.100425        | 398.167025     | 199.587151       | 397.183009     | 199.095143       | G    | <b>666.356952</b> | 333.682114      | 649.330403        | 325.168839        | 648.346387        | 324.676831       | 6  |
| 6  | 578.256903 | 289.632090        | 561.230354     | 281.118815       | 560.246338     | 280.626807       | Y    | <b>609.335488</b> | 305.171382      | 592.308939        | 296.658107        | 591.324923        | 296.166099       | 5  |
| 7  | 679.304582 | 340.155929        | 662.278033     | 331.642655       | 661.294017     | 331.150647       | T    | <b>446.272159</b> | 223.639717      | 429.245610        | 215.126443        | 428.261594        | 214.634435       | 4  |
| 8  | 778.372996 | 389.690136        | 761.346447     | 381.176862       | 760.362431     | 380.684854       | V    | <b>345.224480</b> | 173.115878      | 328.197931        | 164.602603        |                   |                  | 3  |
| 9  | 849.410110 | 425.208693        | 832.383561     | 416.695419       | 831.399545     | 416.203411       | A    | 246.156066        | 123.581671      | <b>229.129517</b> | <b>115.068396</b> |                   |                  | 2  |
| 10 |            |                   |                |                  |                |                  | R    | 175.118952        | 88.063114       | 158.092403        | 79.549839         |                   |                  | 1  |

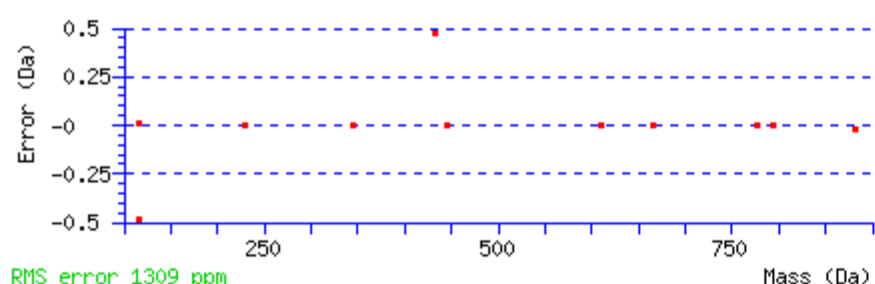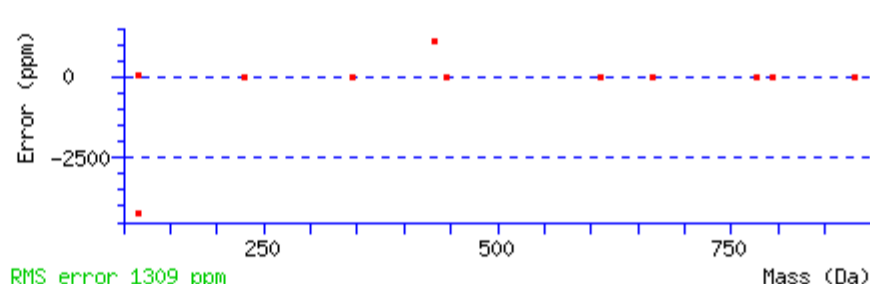

NCBI BLAST search of **AASQGYTVAR**

(Parameters: blastp, nr protein database, expect=20000, no filter, PAM30)

Other BLAST [web gateways](#)

All matches to this query

| Score | Mr(calc):   | Delta     | Sequence                   |
|-------|-------------|-----------|----------------------------|
| 46.7  | 1022.514496 | -0.002048 | <a href="#">AASQGYTVAR</a> |

Mascot: <http://www.matrixscience.com/>

# **MASCOT** Mascot Search Results

## Peptide View

MS/MS Fragmentation of **SSPATADKR**

Found in **SHRM3\_HUMAN**, Protein Shroom3 OS=Homo sapiens GN=SHROOM3 PE=1 SV=2

Match to Query 10996: 931.473528 from(466.744040,2+) rtinseconds(873) index(501)

Title: Locus:1.1.1.1601.5

Data file 2011-11-10 - TFD - EP 3-6.mgf

Click mouse within plot area to zoom in by factor of two about that point

Or, Plot from  to  Da

Label all possible matches  Label matches used for scoring

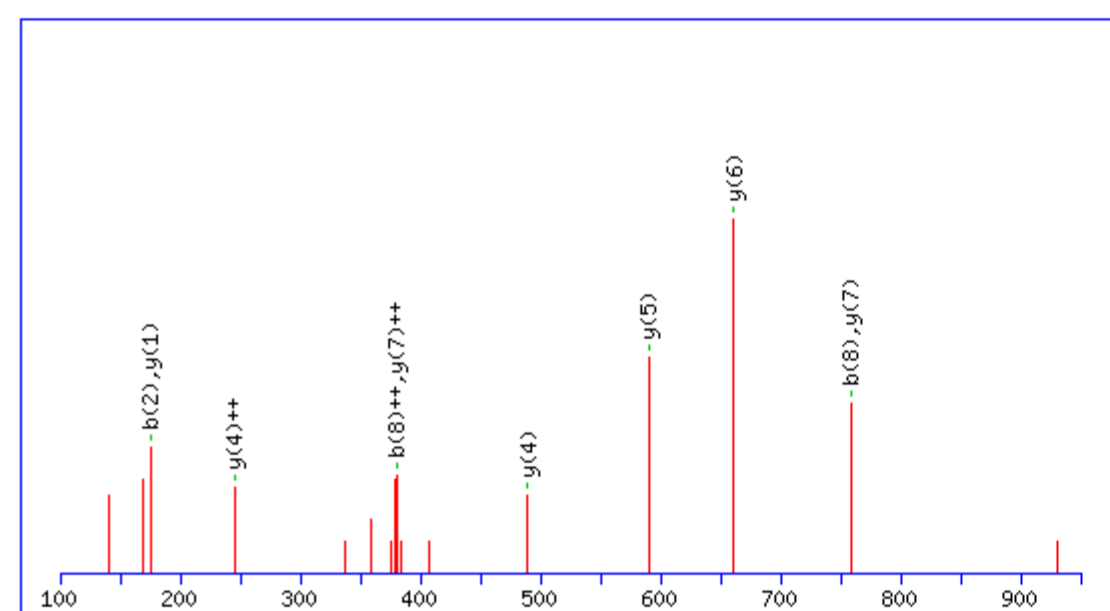

Monoisotopic mass of neutral peptide Mr(calc): 931.472290

Fixed modifications: Propionamide (C) (apply to specified residues or termini only)

Ions Score: 48 Expect: 0.0002

Matches : 10/78 fragment ions using 8 most intense peaks ([help](#))

| # | b                 | b <sup>++</sup>   | b <sup>*</sup> | b <sup>*++</sup> | b <sup>0</sup> | b <sup>0++</sup> | Seq. | y                 | y <sup>++</sup>   | y <sup>*</sup> | y <sup>*++</sup> | y <sup>0</sup> | y <sup>0++</sup> | # |
|---|-------------------|-------------------|----------------|------------------|----------------|------------------|------|-------------------|-------------------|----------------|------------------|----------------|------------------|---|
| 1 | 88.039304         | 44.523290         |                |                  | 70.028739      | 35.518008        | S    |                   |                   |                |                  |                |                  | 9 |
| 2 | <b>175.071332</b> | 88.039304         |                |                  | 157.060767     | 79.034021        | S    | 845.447557        | 423.227417        | 828.421008     | 414.714142       | 827.436992     | 414.222134       | 8 |
| 3 | 272.124096        | 136.565686        |                |                  | 254.113531     | 127.560403       | P    | <b>758.415529</b> | <b>379.711403</b> | 741.388980     | 371.198128       | 740.404964     | 370.706120       | 7 |
| 4 | 343.161210        | 172.084243        |                |                  | 325.150645     | 163.078960       | A    | <b>661.362765</b> | 331.185021        | 644.336216     | 322.671746       | 643.352200     | 322.179738       | 6 |
| 5 | 444.208889        | 222.608082        |                |                  | 426.198324     | 213.602800       | T    | <b>590.325651</b> | 295.666464        | 573.299102     | 287.153189       | 572.315086     | 286.661181       | 5 |
| 6 | 515.246003        | 258.126640        |                |                  | 497.235438     | 249.121357       | A    | <b>489.277972</b> | <b>245.142624</b> | 472.251423     | 236.629349       | 471.267407     | 236.137341       | 4 |
| 7 | 630.272946        | 315.640111        |                |                  | 612.262381     | 306.634828       | D    | 418.240858        | 209.624067        | 401.214309     | 201.110793       | 400.230293     | 200.618785       | 3 |
| 8 | <b>758.367909</b> | <b>379.687592</b> | 741.341360     | 371.174318       | 740.357344     | 370.682310       | K    | 303.213915        | 152.110596        | 286.187366     | 143.597321       |                |                  | 2 |
| 9 |                   |                   |                |                  |                |                  | R    | <b>175.118952</b> | 88.063114         | 158.092403     | 79.549840        |                |                  | 1 |

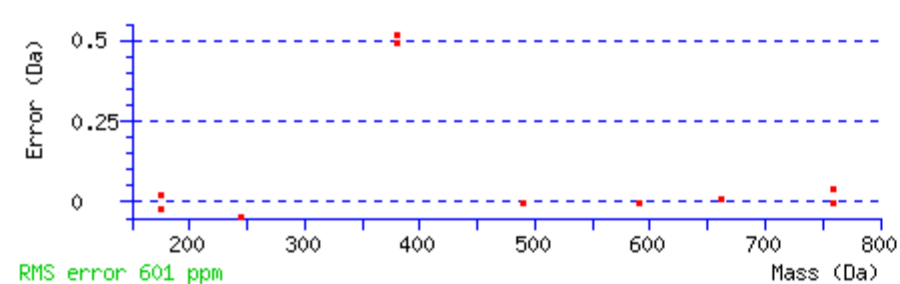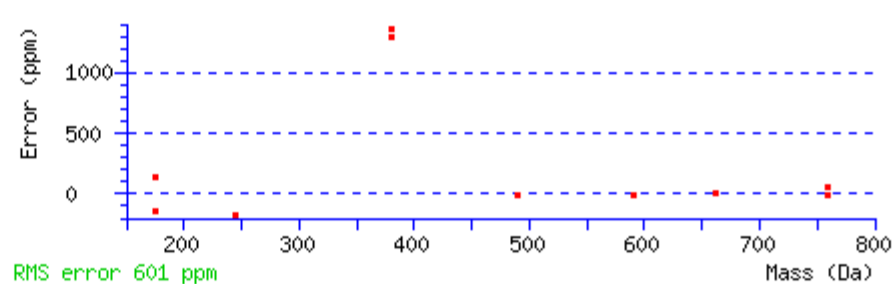

NCBI BLAST search of [SSPATADKR](#)

(Parameters: blastp, nr protein database, expect=20000, no filter, PAM30)

Other BLAST [web gateways](#)

## All matches to this query

| Score | Mr(calc):  | Delta     | Sequence                   |
|-------|------------|-----------|----------------------------|
| 47.8  | 931.472290 | 0.001238  | <a href="#">SSPATADKR</a>  |
| 16.4  | 931.465759 | 0.007769  | <a href="#">CRPNLSR</a>    |
| 14.3  | 931.479675 | -0.006147 | <a href="#">SLIMEAPR</a>   |
| 13.6  | 931.479706 | -0.006178 | <a href="#">IMTTVDPR</a>   |
| 11.1  | 931.479691 | -0.006163 | <a href="#">SLMPSIPR</a>   |
| 11.1  | 931.476349 | -0.002821 | <a href="#">SPFTVPPR</a>   |
| 9.6   | 931.472290 | 0.001238  | <a href="#">ASISPSSGAR</a> |
| 7.9   | 931.476990 | -0.003462 | <a href="#">ASRCRPR</a>    |
| 7.9   | 931.465759 | 0.007769  | <a href="#">GCEAGRLR</a>   |
| 7.9   | 931.481033 | -0.007505 | <a href="#">HFGMLRR</a>    |

# {MATRIX} SCIENCE Mascot Search Results

## Peptide View

MS/MS Fragmentation of **VEYMKLLPK**

Found in **SMAG1\_HUMAN**, Protein Smaug homolog 1 OS=Homo sapiens GN=SAMD4A PE=1 SV=3

Match to Query 24795: 1119.626588 from(560.820570,2+) rtinseconds(3687) index(54379)

Title: Locus:1.1.1.2741.11

Data file 2011-11-10 - TFD - EP 3-4.mgf

Click mouse within plot area to zoom in by factor of two about that point

Or, Plot from  to  Da

Label all possible matches  Label matches used for scoring

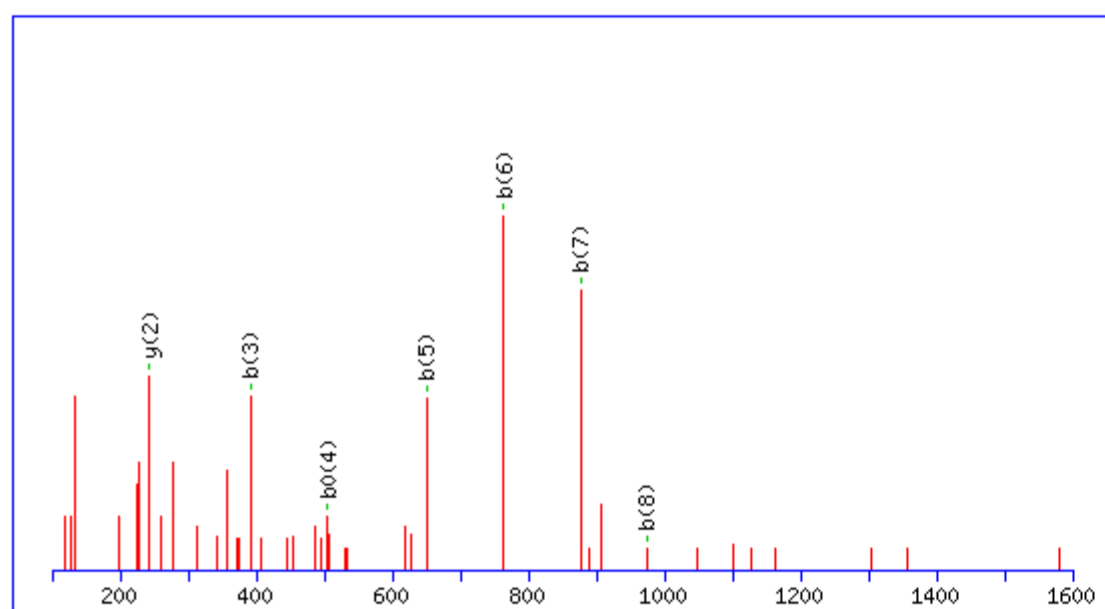

Monoisotopic mass of neutral peptide Mr(calc): 1119.636169

Fixed modifications: Propionamide (C) (apply to specified residues or termini only)

Ions Score: 37 Expect: 0.0013

Matches : 7/72 fragment ions using 10 most intense peaks [\(help\)](#)

| # | b                 | b <sup>++</sup> | b <sup>*</sup> | b <sup>*++</sup> | b <sup>0</sup>    | b <sup>0++</sup> | Seq. | y                 | y <sup>++</sup> | y <sup>*</sup> | y <sup>*++</sup> | y <sup>0</sup> | y <sup>0++</sup> | # |
|---|-------------------|-----------------|----------------|------------------|-------------------|------------------|------|-------------------|-----------------|----------------|------------------|----------------|------------------|---|
| 1 | 100.075690        | 50.541483       |                |                  |                   |                  | V    |                   |                 |                |                  |                |                  | 9 |
| 2 | 229.118283        | 115.062780      |                |                  | 211.107718        | 106.057497       | E    | 1021.575066       | 511.291171      | 1004.548517    | 502.777897       | 1003.564501    | 502.285889       | 8 |
| 3 | <b>392.181612</b> | 196.594444      |                |                  | 374.171047        | 187.589162       | Y    | 892.532473        | 446.769875      | 875.505924     | 438.256600       |                |                  | 7 |
| 4 | 523.222097        | 262.114687      |                |                  | <b>505.211532</b> | 253.109404       | M    | 729.469144        | 365.238210      | 712.442595     | 356.724936       |                |                  | 6 |
| 5 | <b>651.317060</b> | 326.162168      | 634.290511     | 317.648894       | 633.306495        | 317.156886       | K    | 598.428659        | 299.717968      | 581.402110     | 291.204693       |                |                  | 5 |
| 6 | <b>764.401124</b> | 382.704200      | 747.374575     | 374.190926       | 746.390559        | 373.698918       | L    | 470.333696        | 235.670486      | 453.307147     | 227.157212       |                |                  | 4 |
| 7 | <b>877.485188</b> | 439.246232      | 860.458639     | 430.732958       | 859.474623        | 430.240950       | L    | 357.249632        | 179.128454      | 340.223083     | 170.615180       |                |                  | 3 |
| 8 | <b>974.537952</b> | 487.772614      | 957.511403     | 479.259340       | 956.527387        | 478.767332       | P    | <b>244.165568</b> | 122.586422      | 227.139019     | 114.073148       |                |                  | 2 |
| 9 |                   |                 |                |                  |                   |                  | K    | 147.112804        | 74.060040       | 130.086255     | 65.546765        |                |                  | 1 |

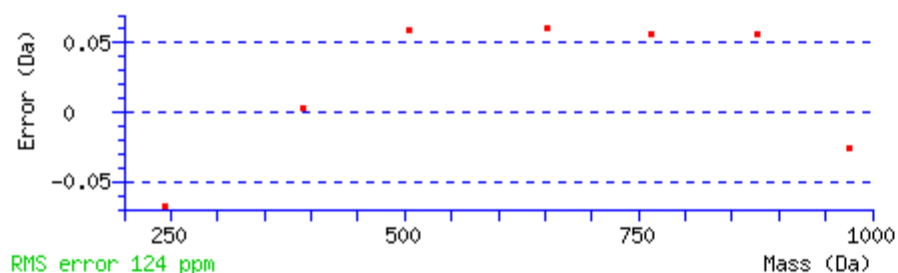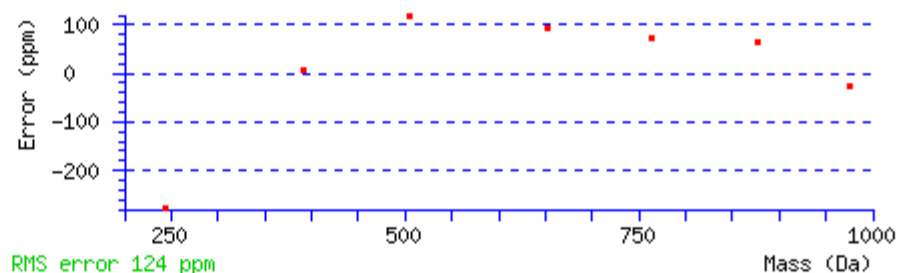

NCBI BLAST search of **VEYMKLLPK**

(Parameters: blastp, nr protein database, expect=20000, no filter, PAM30)

Other BLAST [web gateways](#)

## All matches to this query

| Score | Mr(calc):   | Delta     | Sequence                   |
|-------|-------------|-----------|----------------------------|
| 36.5  | 1119.636169 | -0.009581 | <a href="#">VEYMKLLPK</a>  |
| 10.9  | 1119.617554 | 0.009034  | <a href="#">DAGIYEVILK</a> |
| 9.6   | 1119.617554 | 0.009034  | <a href="#">EKVLEDFLK</a>  |
| 9.1   | 1119.632813 | -0.006224 | <a href="#">VYEKLFPPK</a>  |
| 8.2   | 1119.617554 | 0.009034  | <a href="#">LLEDYKVPK</a>  |
| 3.3   | 1119.632828 | -0.006240 | <a href="#">QFPILLDFK</a>  |

# MASCOT SCIENCE Mascot Search Results

## Peptide View

MS/MS Fragmentation of **EGAGSPAAPGTLPLEK**

Found in **SOX15\_HUMAN**, Protein SOX-15 OS=Homo sapiens GN=SOX15 PE=2 SV=1

Match to Query 833358: 1493.778008 from(747.896280,2+) rtinseconds(2086) index(264200)

Title: Locus:1.1.1.1243.33

Data file C:\Program Files (x86)\Matrix Science\Mascot Daemon\mgf3 TFD - Epitel - R2\mascot\_daemon\_merge.mgf

Click mouse within plot area to zoom in by factor of two about that point

Or, Plot from  to  Da

Label all possible matches  Label matches used for scoring

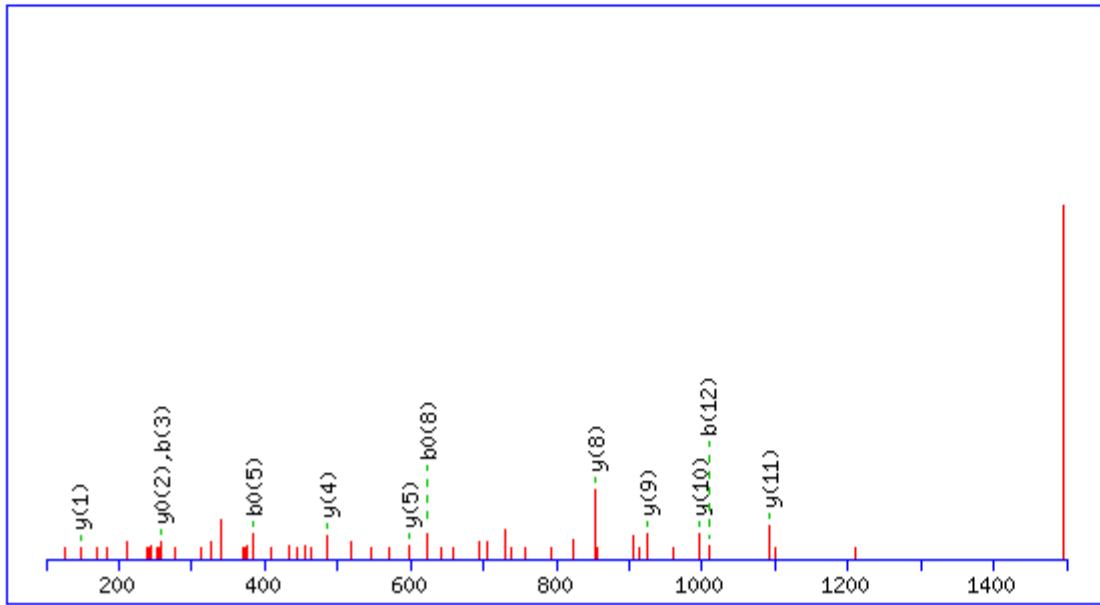

Monoisotopic mass of neutral peptide Mr(calc): 1493.772552

Fixed modifications: Carbamidomethyl (C) (apply to specified residues or termini only)

Ions Score: 40 Expect: 0.0012

Matches : 12/148 fragment ions using 21 most intense peaks [\(help\)](#)

| #  | b                  | b <sup>++</sup> | b <sup>0</sup>    | b <sup>0++</sup> | Seq. | y                  | y <sup>++</sup> | y <sup>*</sup> | y <sup>+++</sup> | y <sup>0</sup>    | y <sup>0++</sup> | #  |
|----|--------------------|-----------------|-------------------|------------------|------|--------------------|-----------------|----------------|------------------|-------------------|------------------|----|
| 1  | 130.049869         | 65.528572       | 112.039304        | 56.523290        | E    |                    |                 |                |                  |                   |                  | 16 |
| 2  | 187.071333         | 94.039305       | 169.060768        | 85.034022        | G    | 1365.737258        | 683.372267      | 1348.710709    | 674.858993       | 1347.726693       | 674.366984       | 15 |
| 3  | <b>258.108447</b>  | 129.557862      | 240.097882        | 120.552579       | A    | 1308.715794        | 654.861535      | 1291.689245    | 646.348261       | 1290.705229       | 645.856252       | 14 |
| 4  | 315.129911         | 158.068593      | 297.119346        | 149.063311       | G    | 1237.678680        | 619.342978      | 1220.652131    | 610.829704       | 1219.668115       | 610.337696       | 13 |
| 5  | 402.161939         | 201.584608      | <b>384.151374</b> | 192.579325       | S    | 1180.657216        | 590.832246      | 1163.630667    | 582.318972       | 1162.646651       | 581.826964       | 12 |
| 6  | 499.214703         | 250.110990      | 481.204138        | 241.105707       | P    | <b>1093.625188</b> | 547.316232      | 1076.598639    | 538.802958       | 1075.614623       | 538.310949       | 11 |
| 7  | 570.251817         | 285.629547      | 552.241252        | 276.624264       | A    | <b>996.572424</b>  | 498.789850      | 979.545875     | 490.276575       | 978.561859        | 489.784567       | 10 |
| 8  | 641.288931         | 321.148104      | <b>623.278366</b> | 312.142821       | A    | <b>925.535310</b>  | 463.271293      | 908.508761     | 454.758018       | 907.524745        | 454.266010       | 9  |
| 9  | 738.341695         | 369.674486      | 720.331130        | 360.669203       | P    | <b>854.498196</b>  | 427.752736      | 837.471647     | 419.239462       | 836.487631        | 418.747454       | 8  |
| 10 | 795.363159         | 398.185218      | 777.352594        | 389.179935       | G    | 757.445432         | 379.226354      | 740.418883     | 370.713079       | 739.434867        | 370.221071       | 7  |
| 11 | 896.410838         | 448.709057      | 878.400273        | 439.703775       | T    | 700.423968         | 350.715622      | 683.397419     | 342.202347       | 682.413403        | 341.710339       | 6  |
| 12 | <b>1009.494902</b> | 505.251089      | 991.484337        | 496.245807       | L    | <b>599.376289</b>  | 300.191782      | 582.349740     | 291.678508       | 581.365724        | 291.186500       | 5  |
| 13 | 1106.547666        | 553.777471      | 1088.537101       | 544.772189       | P    | <b>486.292225</b>  | 243.649750      | 469.265676     | 235.136476       | 468.281660        | 234.644468       | 4  |
| 14 | 1219.631730        | 610.319503      | 1201.621165       | 601.314221       | L    | 389.239461         | 195.123368      | 372.212912     | 186.610094       | 371.228896        | 186.118086       | 3  |
| 15 | 1348.674323        | 674.840800      | 1330.663758       | 665.835517       | E    | 276.155397         | 138.581336      | 259.128848     | 130.068062       | <b>258.144832</b> | 129.576054       | 2  |
| 16 |                    |                 |                   |                  | K    | <b>147.112804</b>  | 74.060040       | 130.086255     | 65.546765        |                   |                  | 1  |

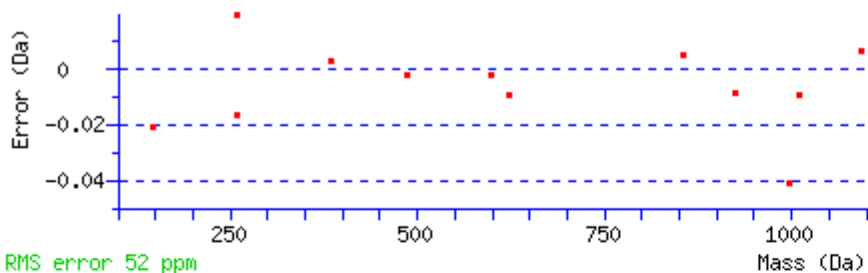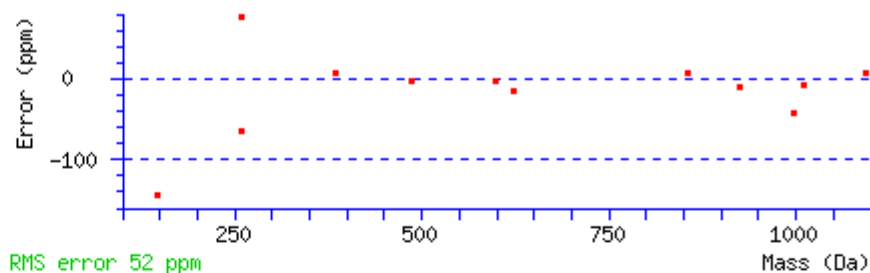

NCBI BLAST search of [EGAGSPAAPGTLPLEK](#)

(Parameters: blastp, nr protein database, expect=20000, no filter, PAM30)

Other BLAST [web gateways](#)

All matches to this query

| Score | Mr(calc):   | Delta     | Sequence                         |
|-------|-------------|-----------|----------------------------------|
| 39.7  | 1493.772552 | 0.005456  | <a href="#">EGAGSPAAPGTLPLEK</a> |
| 11.2  | 1493.783768 | -0.005760 | <a href="#">LDPAALSPANPREK</a>   |

Mascot: <http://www.matrixscience.com/>

# **MASCOT** Mascot Search Results

## Peptide View

MS/MS Fragmentation of **FATTEAIQR**

Found in **SC16B\_HUMAN**, Protein transport protein Sec16B OS=Homo sapiens GN=SEC16B PE=1 SV=2

Match to Query 308284: 1035.528748 from(518.771650,2+) rtinseconds(1521) index(420695)

Title: Locus:1.1.1.919.20

Data file C:\Program Files (x86)\Matrix Science\Mascot Daemon\mgf3 TFD - Epitel - R2\mascot\_daemon\_merge.mgf

Click mouse within plot area to zoom in by factor of two about that point

Or, Plot from  to  Da

Label all possible matches  Label matches used for scoring

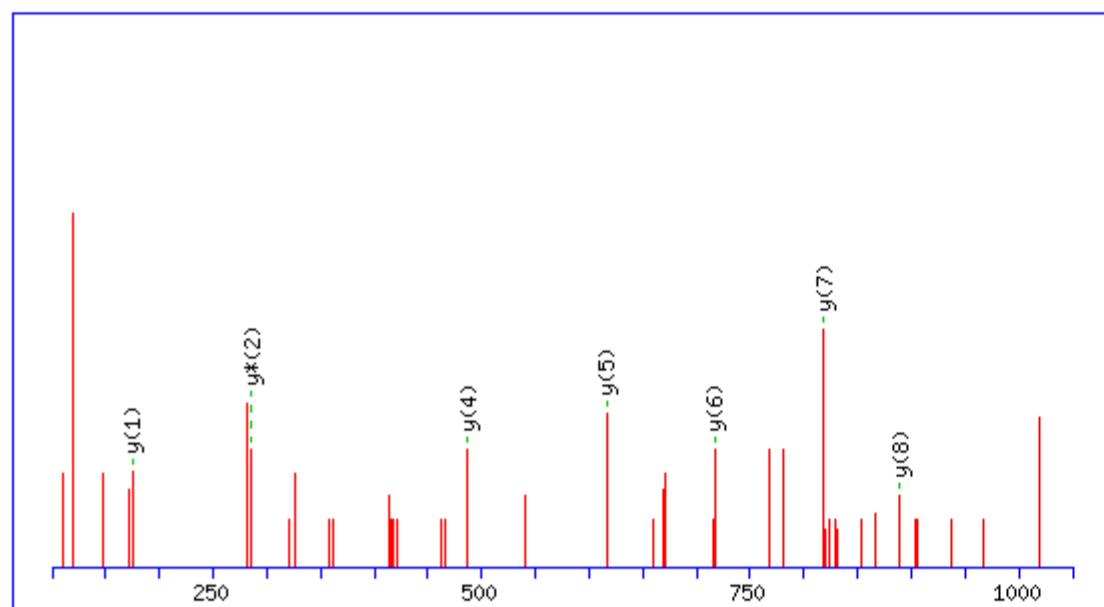

Monoisotopic mass of neutral peptide Mr(calc): 1035.534897

Fixed modifications: Carbamidomethyl (C) (apply to specified residues or termini only)

Ions Score: 33 Expect: 0.0075

Matches : 7/70 fragment ions using 18 most intense peaks [\(help\)](#)

| # | b          | b <sup>++</sup> | b <sup>*</sup> | b <sup>*++</sup> | b <sup>0</sup> | b <sup>0++</sup> | Seq. | y                 | y <sup>++</sup> | y <sup>*</sup>    | y <sup>*++</sup> | y <sup>0</sup> | y <sup>0++</sup> | # |
|---|------------|-----------------|----------------|------------------|----------------|------------------|------|-------------------|-----------------|-------------------|------------------|----------------|------------------|---|
| 1 | 148.075690 | 74.541483       |                |                  |                |                  | F    |                   |                 |                   |                  |                |                  | 9 |
| 2 | 219.112804 | 110.060040      |                |                  |                |                  | A    | <b>889.473773</b> | 445.240525      | 872.447224        | 436.727250       | 871.463208     | 436.235242       | 8 |
| 3 | 320.160483 | 160.583879      |                |                  | 302.149918     | 151.578597       | T    | <b>818.436659</b> | 409.721968      | 801.410110        | 401.208693       | 800.426094     | 400.716685       | 7 |
| 4 | 421.208162 | 211.107719      |                |                  | 403.197597     | 202.102437       | T    | <b>717.388980</b> | 359.198128      | 700.362431        | 350.684853       | 699.378415     | 350.192845       | 6 |
| 5 | 550.250755 | 275.629016      |                |                  | 532.240190     | 266.623733       | E    | <b>616.341301</b> | 308.674288      | 599.314752        | 300.161014       | 598.330736     | 299.669006       | 5 |
| 6 | 621.287869 | 311.147573      |                |                  | 603.277304     | 302.142290       | A    | <b>487.298708</b> | 244.152992      | 470.272159        | 235.639717       |                |                  | 4 |
| 7 | 734.371933 | 367.689605      |                |                  | 716.361368     | 358.684322       | I    | 416.261594        | 208.634435      | 399.235045        | 200.121160       |                |                  | 3 |
| 8 | 862.430511 | 431.718894      | 845.403962     | 423.205619       | 844.419946     | 422.713611       | Q    | 303.177530        | 152.092403      | <b>286.150981</b> | 143.579128       |                |                  | 2 |
| 9 |            |                 |                |                  |                |                  | R    | <b>175.118952</b> | 88.063114       | 158.092403        | 79.549839        |                |                  | 1 |

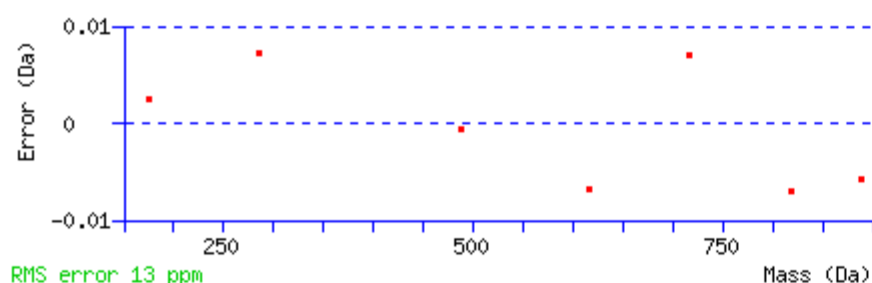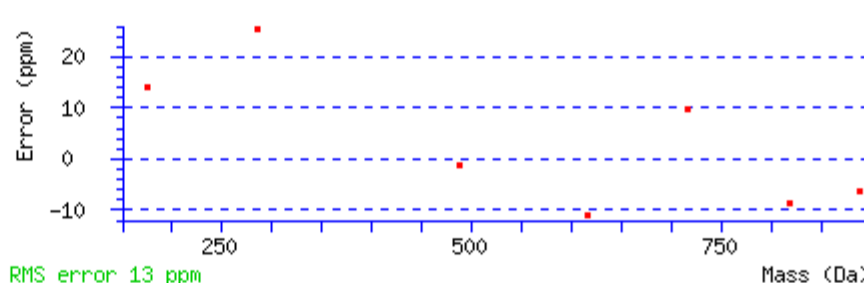

NCBI BLAST search of **FATTEAIQR**

(Parameters: blastp, nr protein database, expect=20000, no filter, PAM30)

Other BLAST [web gateways](#)

## All matches to this query

| Score | Mr(calc):   | Delta     | Sequence                  |
|-------|-------------|-----------|---------------------------|
| 32.7  | 1035.534897 | -0.006149 | <a href="#">FATTEAIQR</a> |
| 16.2  | 1035.534912 | -0.006164 | <a href="#">VAVVQYSR</a>  |
| 11.2  | 1035.520493 | 0.008255  | <a href="#">MASMLLAQR</a> |
| 4.9   | 1035.534882 | -0.006134 | <a href="#">VNYDEIKR</a>  |
| 3.6   | 1035.528366 | 0.000382  | <a href="#">MARSLTWR</a>  |

Mascot: <http://www.matrixscience.com/>

# MASCOT SCIENCE Mascot Search Results

## Peptide View

MS/MS Fragmentation of **SVSSSLSDAR**

Found in **SC24B\_HUMAN**, Protein transport protein Sec24B OS=Homo sapiens GN=SEC24B PE=1 SV=2

Match to Query 270505: 1007.488248 from(504.751400,2+) rtinseconds(1210) index(332530)

Title: Locus:1.1.1.795.16

Data file C:\Program Files (x86)\Matrix Science\Mascot Daemon\mgf3 TFD - Epitel - R2\mascot\_daemon\_merge.mgf

Click mouse within plot area to zoom in by factor of two about that point

Or, Plot from  to  Da

Label all possible matches  Label matches used for scoring

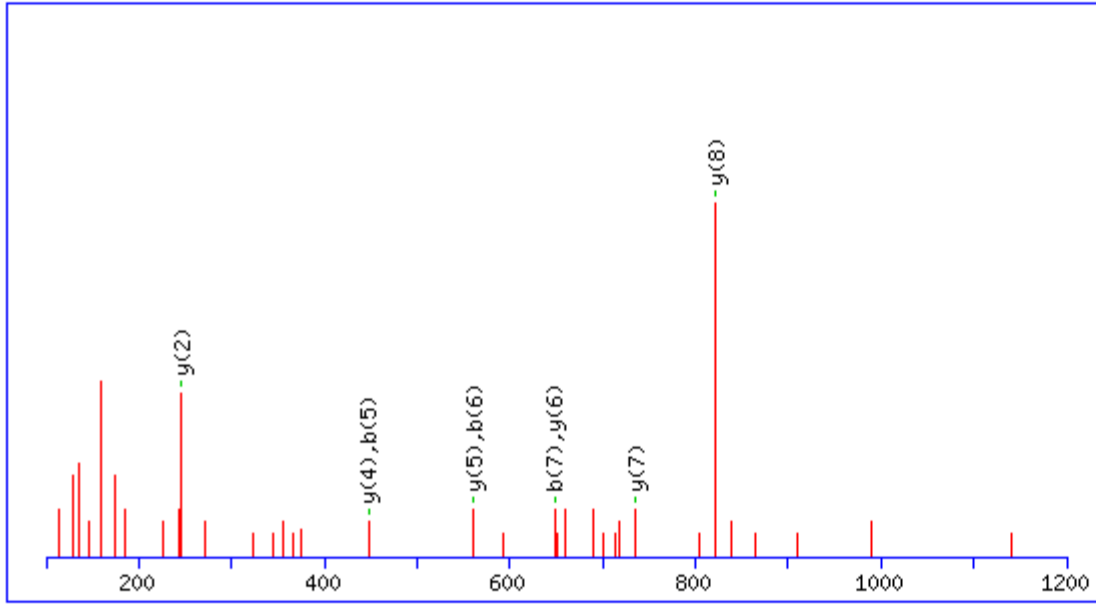

Monoisotopic mass of neutral peptide Mr(calc): 1007.488342

Fixed modifications: Carbamidomethyl (C) (apply to specified residues or termini only)

Ions Score: 52 Expect: 7e-005

Matches : 9/86 fragment ions using 9 most intense peaks ([help](#))

| #  | b                 | b <sup>++</sup> | b <sup>0</sup> | b <sup>0++</sup> | Seq. | y                 | y <sup>++</sup> | y <sup>*</sup> | y <sup>*++</sup> | y <sup>0</sup> | y <sup>0++</sup> | #  |
|----|-------------------|-----------------|----------------|------------------|------|-------------------|-----------------|----------------|------------------|----------------|------------------|----|
| 1  | 88.039304         | 44.523290       | 70.028739      | 35.518008        | S    |                   |                 |                |                  |                |                  | 10 |
| 2  | 187.107718        | 94.057497       | 169.097153     | 85.052214        | V    | 921.463599        | 461.235438      | 904.437050     | 452.722163       | 903.453034     | 452.230155       | 9  |
| 3  | 274.139746        | 137.573511      | 256.129181     | 128.568229       | S    | <b>822.395185</b> | 411.701231      | 805.368636     | 403.187956       | 804.384620     | 402.695948       | 8  |
| 4  | 361.171774        | 181.089525      | 343.161209     | 172.084242       | S    | <b>735.363157</b> | 368.185217      | 718.336608     | 359.671942       | 717.352592     | 359.179934       | 7  |
| 5  | <b>448.203802</b> | 224.605539      | 430.193237     | 215.600256       | S    | <b>648.331129</b> | 324.669203      | 631.304580     | 316.155928       | 630.320564     | 315.663920       | 6  |
| 6  | <b>561.287866</b> | 281.147571      | 543.277301     | 272.142289       | L    | <b>561.299101</b> | 281.153189      | 544.272552     | 272.639914       | 543.288536     | 272.147906       | 5  |
| 7  | <b>648.319894</b> | 324.663585      | 630.309329     | 315.658302       | S    | <b>448.215037</b> | 224.611156      | 431.188488     | 216.097882       | 430.204472     | 215.605874       | 4  |
| 8  | 763.346837        | 382.177056      | 745.336272     | 373.171774       | D    | 361.183009        | 181.095142      | 344.156460     | 172.581868       | 343.172444     | 172.089860       | 3  |
| 9  | 834.383951        | 417.695613      | 816.373386     | 408.690331       | A    | <b>246.156066</b> | 123.581671      | 229.129517     | 115.068397       |                |                  | 2  |
| 10 |                   |                 |                |                  | R    | 175.118952        | 88.063114       | 158.092403     | 79.549840        |                |                  | 1  |

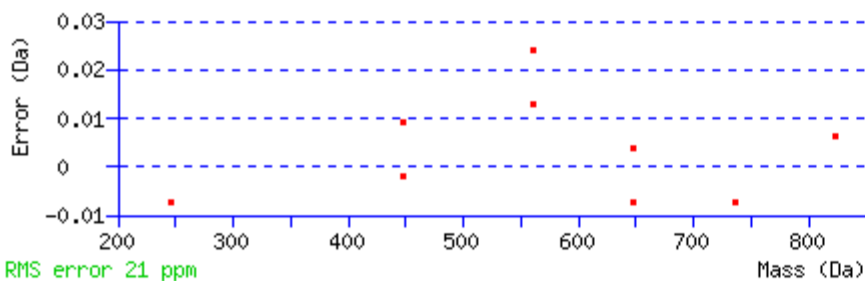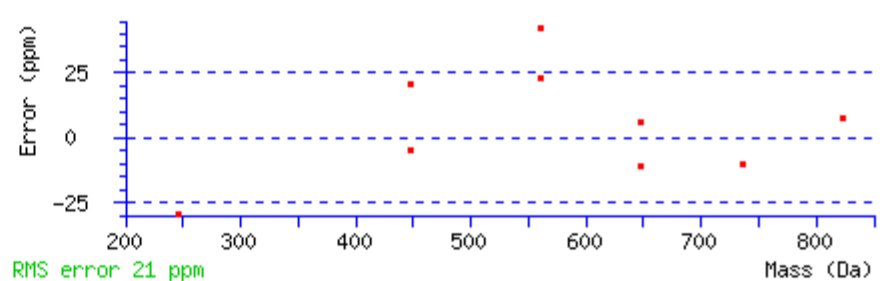

NCBI BLAST search of [SVSSSLSDAR](#)

(Parameters: blastp, nr protein database, expect=20000, no filter, PAM30)

Other BLAST [web gateways](#)

## All matches to this query

| Score | Mr(calc):   | Delta     | Sequence                   |
|-------|-------------|-----------|----------------------------|
| 52.1  | 1007.488342 | -0.000094 | <a href="#">SVSSSLSDAR</a> |
| 15.4  | 1007.485825 | 0.002423  | <a href="#">APQYTMAAR</a>  |
| 5.0   | 1007.478455 | 0.009793  | <a href="#">GTPGYRGER</a>  |
| 2.0   | 1007.495743 | -0.007495 | <a href="#">SVSLAGNTIM</a> |
| 0.4   | 1007.478455 | 0.009793  | <a href="#">QEPHPGTSR</a>  |

Mascot: <http://www.matrixscience.com/>

# **MASCOT** Mascot Search Results

## Peptide View

MS/MS Fragmentation of **LPVDQYR**

Found in **TRIQK\_HUMAN**, Protein TRIQK OS=Homo sapiens GN=C8orf83 PE=2 SV=1

Match to Query 7389: 889.469868 from(445.742210,2+) rtinseconds(1580) index(9274)

Title: Locus:1.1.1.2008.7

Data file 2011-11-10 - TFD - EP 3-7.mgf

Click mouse within plot area to zoom in by factor of two about that point

Or, Plot from  to  Da

Label all possible matches  Label matches used for scoring

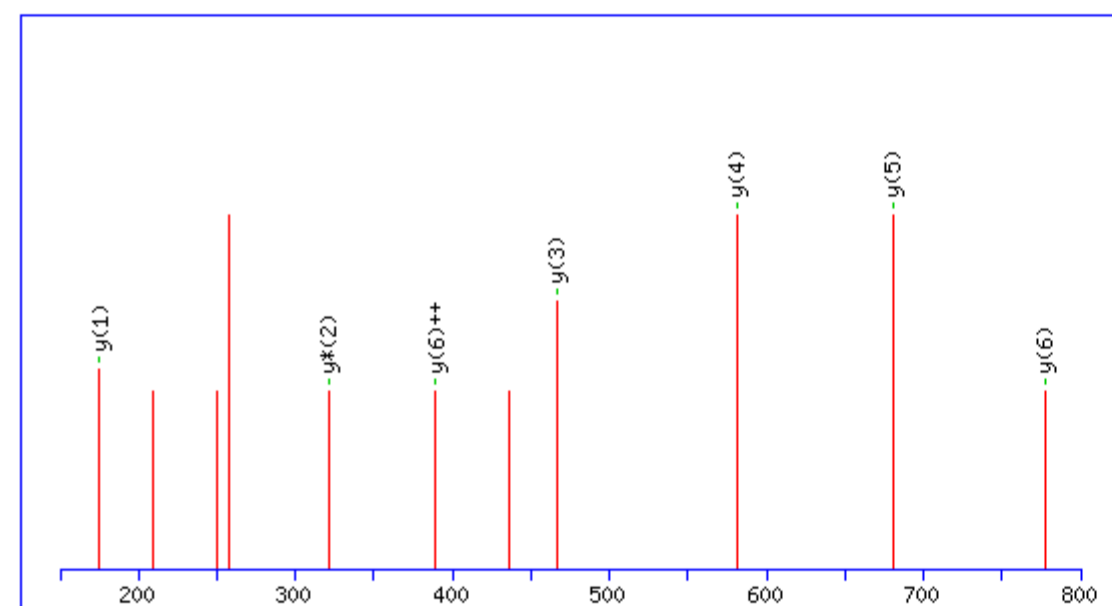

Monoisotopic mass of neutral peptide Mr(calc): 889.465759

Fixed modifications: Propionamide (C) (apply to specified residues or termini only)

Ions Score: 43 Expect: 0.0012

Matches : 7/52 fragment ions using 8 most intense peaks [\(help\)](#)

| # | b          | b <sup>++</sup> | b <sup>*</sup> | b <sup>*++</sup> | b <sup>0</sup> | b <sup>0++</sup> | Seq. | y          | y <sup>++</sup> | y <sup>*</sup> | y <sup>*++</sup> | y <sup>0</sup> | y <sup>0++</sup> | # |
|---|------------|-----------------|----------------|------------------|----------------|------------------|------|------------|-----------------|----------------|------------------|----------------|------------------|---|
| 1 | 114.091340 | 57.549308       |                |                  |                |                  | L    |            |                 |                |                  |                |                  | 7 |
| 2 | 211.144104 | 106.075690      |                |                  |                |                  | P    | 777.388980 | 389.198128      | 760.362431     | 380.684854       | 759.378415     | 380.192846       | 6 |
| 3 | 310.212518 | 155.609897      |                |                  |                |                  | V    | 680.336216 | 340.671746      | 663.309667     | 332.158472       | 662.325651     | 331.666464       | 5 |
| 4 | 425.239461 | 213.123369      |                |                  | 407.228896     | 204.118086       | D    | 581.267802 | 291.137539      | 564.241253     | 282.624265       | 563.257237     | 282.132257       | 4 |
| 5 | 553.298039 | 277.152658      | 536.271490     | 268.639383       | 535.287474     | 268.147375       | Q    | 466.240859 | 233.624067      | 449.214310     | 225.110793       |                |                  | 3 |
| 6 | 716.361368 | 358.684322      | 699.334819     | 350.171048       | 698.350803     | 349.679040       | Y    | 338.182281 | 169.594778      | 321.155732     | 161.081504       |                |                  | 2 |
| 7 |            |                 |                |                  |                |                  | R    | 175.118952 | 88.063114       | 158.092403     | 79.549839        |                |                  | 1 |

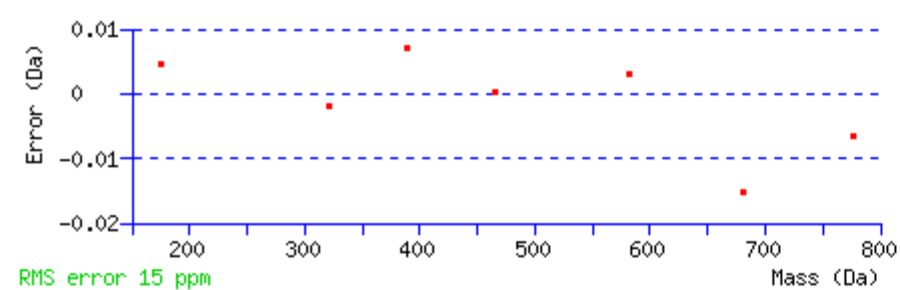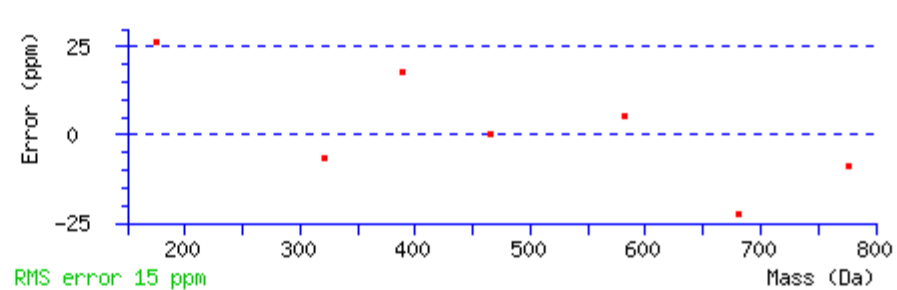

NCBI BLAST search of **LPVDQYR**

(Parameters: blastp, nr protein database, expect=20000, no filter, PAM30)

Other BLAST [web gateways](#)

All matches to this query

| Score | Mr(calc):  | Delta     | Sequence                 |
|-------|------------|-----------|--------------------------|
| 43.1  | 889.465759 | 0.004109  | <a href="#">LPVDQYR</a>  |
| 15.3  | 889.469116 | 0.000752  | <a href="#">LPKTEMR</a>  |
| 14.7  | 889.476974 | -0.007106 | <a href="#">IPADRYR</a>  |
| 12.1  | 889.465759 | 0.004109  | <a href="#">IPFDRDK</a>  |
| 10.2  | 889.472961 | -0.003093 | <a href="#">LSGNTSRR</a> |
| 9.6   | 889.476990 | -0.007122 | <a href="#">LNFGNGNR</a> |
| 8.6   | 889.476517 | -0.006649 | <a href="#">IVIMPCK</a>  |
| 8.3   | 889.476990 | -0.007122 | <a href="#">LPRADFR</a>  |
| 6.9   | 889.476974 | -0.007106 | <a href="#">LDYPRAR</a>  |
| 6.9   | 889.465744 | 0.004124  | <a href="#">LNYLDPR</a>  |

# MASCOT SEARCH RESULTS

## Peptide View

MS/MS Fragmentation of **SVGWGNIFQLPFK**

Found in **UN93B\_HUMAN**, Protein unc-93 homolog B1 OS=Homo sapiens GN=UNC93B1 PE=1 SV=2

Match to Query 45760: 1491.790708 from(746.902630,2+) rtinseconds(4281) index(64332)

Title: Locus:1.1.1.3016.32

Data file 2011-11-14 - TFD - EP 8-1.mgf

Click mouse within plot area to zoom in by factor of two about that point

Or, Plot from  to  Da

Label all possible matches  Label matches used for scoring

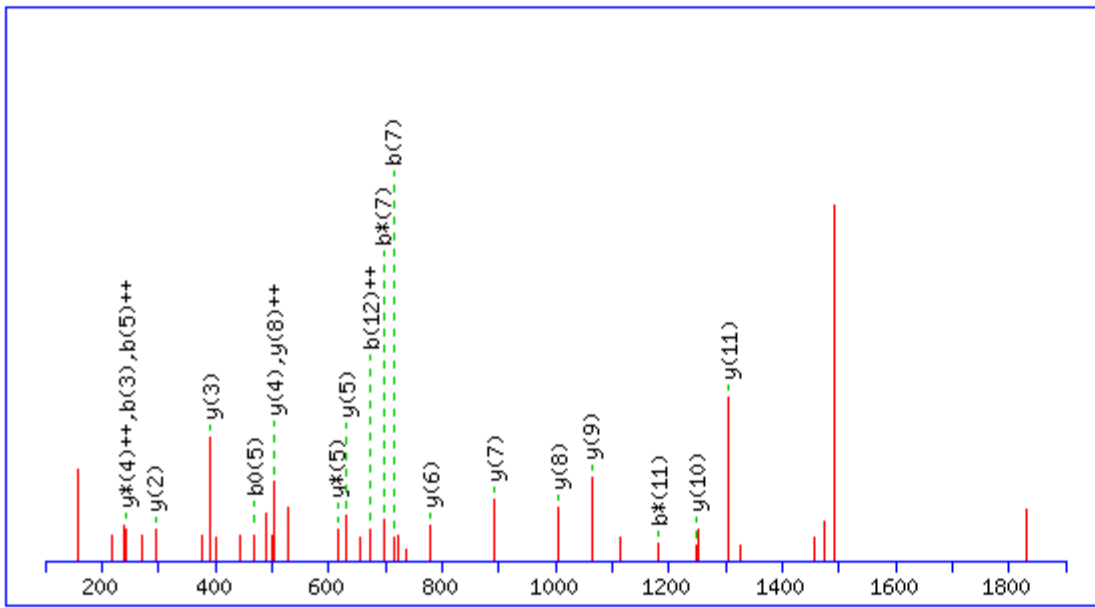

Monoisotopic mass of neutral peptide Mr(calc): 1491.787445

Fixed modifications: Propionamide (C) (apply to specified residues or termini only)

Ions Score: 66 Expect: 2.9e-006

Matches : 20/110 fragment ions using 35 most intense peaks [\(help\)](#)

| #  | b                 | b <sup>++</sup>   | b*                 | b <sup>+++</sup> | b <sup>0</sup>    | b <sup>0++</sup> | Seq. | y                  | y <sup>++</sup>   | y*                | y <sup>+++</sup>  | #  |
|----|-------------------|-------------------|--------------------|------------------|-------------------|------------------|------|--------------------|-------------------|-------------------|-------------------|----|
| 1  | 88.039304         | 44.523290         |                    |                  | 70.028739         | 35.518008        | S    |                    |                   |                   |                   | 13 |
| 2  | 187.107718        | 94.057497         |                    |                  | 169.097153        | 85.052214        | V    | 1405.762684        | 703.384980        | 1388.736135       | 694.871706        | 12 |
| 3  | <b>244.129182</b> | 122.568229        |                    |                  | 226.118617        | 113.562946       | G    | <b>1306.694270</b> | 653.850773        | 1289.667721       | 645.337499        | 11 |
| 4  | 430.208495        | 215.607886        |                    |                  | 412.197930        | 206.602603       | W    | <b>1249.672806</b> | 625.340041        | 1232.646257       | 616.826767        | 10 |
| 5  | 487.229959        | <b>244.118618</b> |                    |                  | <b>469.219394</b> | 235.113335       | G    | <b>1063.593493</b> | 532.300385        | 1046.566944       | 523.787110        | 9  |
| 6  | 601.272886        | 301.140081        | 584.246337         | 292.626807       | 583.262321        | 292.134799       | N    | <b>1006.572029</b> | <b>503.789653</b> | 989.545480        | 495.276378        | 8  |
| 7  | <b>714.356950</b> | 357.682113        | <b>697.330401</b>  | 349.168839       | 696.346385        | 348.676831       | I    | <b>892.529102</b>  | 446.768189        | 875.502553        | 438.254915        | 7  |
| 8  | 861.425364        | 431.216320        | 844.398815         | 422.703046       | 843.414799        | 422.211038       | F    | <b>779.445038</b>  | 390.226157        | 762.418489        | 381.712883        | 6  |
| 9  | 989.483942        | 495.245609        | 972.457393         | 486.732335       | 971.473377        | 486.240327       | Q    | <b>632.376624</b>  | 316.691950        | <b>615.350075</b> | 308.178676        | 5  |
| 10 | 1102.568006       | 551.787641        | 1085.541457        | 543.274367       | 1084.557441       | 542.782358       | L    | <b>504.318046</b>  | 252.662661        | 487.291497        | <b>244.149386</b> | 4  |
| 11 | 1199.620770       | 600.314023        | <b>1182.594221</b> | 591.800749       | 1181.610205       | 591.308741       | P    | <b>391.233982</b>  | 196.120629        | 374.207433        | 187.607355        | 3  |
| 12 | 1346.689184       | <b>673.848230</b> | 1329.662635        | 665.334956       | 1328.678619       | 664.842948       | F    | <b>294.181218</b>  | 147.594247        | 277.154669        | 139.080973        | 2  |
| 13 |                   |                   |                    |                  |                   |                  | K    | 147.112804         | 74.060040         | 130.086255        | 65.546765         | 1  |

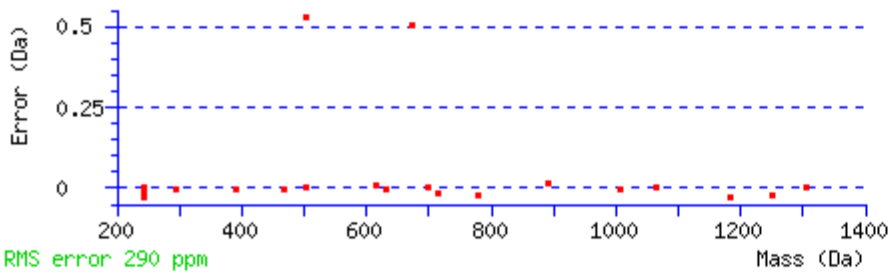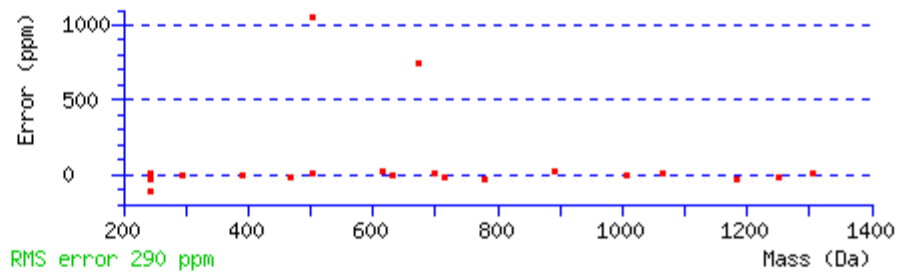

NCBI BLAST search of [SVGWGNIFQLPFK](#)

(Parameters: blastp, nr protein database, expect=20000, no filter, PAM30)

Other BLAST [web gateways](#)

## All matches to this query

| Score | Mr(calc):   | Delta     | Sequence                      |
|-------|-------------|-----------|-------------------------------|
| 65.8  | 1491.787445 | 0.003263  | <a href="#">SVGWGNIFQLPFK</a> |
| 7.0   | 1491.804504 | -0.013796 | <a href="#">ELEDLIPKNHIR</a>  |
| 1.8   | 1491.804535 | -0.013827 | <a href="#">QSTSQHLPKLPK</a>  |

Mascot: <http://www.matrixscience.com/>



# **MATRIX** SCIENCE Mascot Search Results

## Peptide View

MS/MS Fragmentation of **TLKPPGR**

Found in **WNT6\_HUMAN**, Protein Wnt-6 OS=Homo sapiens GN=WNT6 PE=2 SV=2

Match to Query 142: 799.458968 from(400.736760,2+) rtinseconds(1464) index(12319)

Title: Locus:1.1.1.2002.2

Data file 2011-11-10 - TFD - EP 3-2.mgf

Click mouse within plot area to zoom in by factor of two about that point

Or, Plot from  to  Da

Label all possible matches  Label matches used for scoring

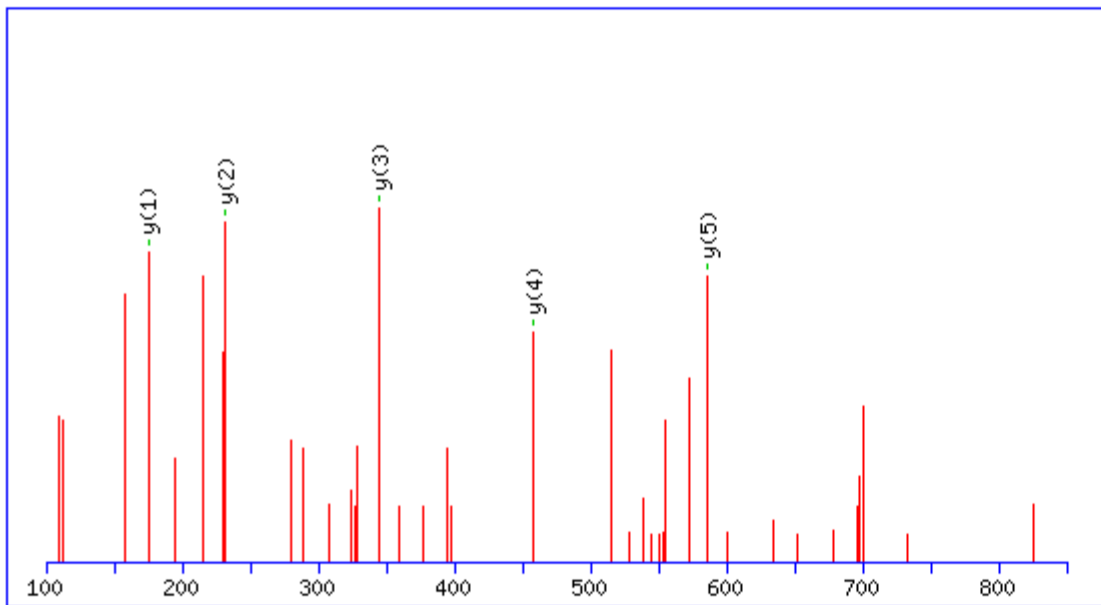

Monoisotopic mass of neutral peptide Mr(calc): 799.455200

Fixed modifications: Propionamide (C) (apply to specified residues or termini only)

Variable modifications:

P4 : Oxidation (P)

P5 : Oxidation (P)

Ions Score: 41 Expect: 0.0016

Matches : 5/56 fragment ions using 7 most intense peaks [\(help\)](#)

| # | b          | b <sup>++</sup> | b <sup>*</sup> | b <sup>+++</sup> | b <sup>0</sup> | b <sup>0++</sup> | Seq. | y                 | y <sup>++</sup> | y <sup>*</sup> | y <sup>+++</sup> | # |
|---|------------|-----------------|----------------|------------------|----------------|------------------|------|-------------------|-----------------|----------------|------------------|---|
| 1 | 102.054955 | 51.531116       |                |                  | 84.044390      | 42.525833        | T    |                   |                 |                |                  | 7 |
| 2 | 215.139019 | 108.073147      |                |                  | 197.128454     | 99.067865        | L    | 699.414801        | 350.211039      | 682.388252     | 341.697764       | 6 |
| 3 | 343.233982 | 172.120629      | 326.207433     | 163.607355       | 325.223417     | 163.115347       | K    | <b>586.330737</b> | 293.669007      | 569.304188     | 285.155732       | 5 |
| 4 | 456.281661 | 228.644469      | 439.255112     | 220.131194       | 438.271096     | 219.639186       | P    | <b>458.235774</b> | 229.621525      | 441.209225     | 221.108251       | 4 |
| 5 | 569.329340 | 285.168308      | 552.302791     | 276.655034       | 551.318775     | 276.163026       | P    | <b>345.188095</b> | 173.097685      | 328.161546     | 164.584411       | 3 |
| 6 | 626.350804 | 313.679040      | 609.324255     | 305.165766       | 608.340239     | 304.673758       | G    | <b>232.140416</b> | 116.573846      | 215.113867     | 108.060571       | 2 |
| 7 |            |                 |                |                  |                |                  | R    | <b>175.118952</b> | 88.063114       | 158.092403     | 79.549839        | 1 |

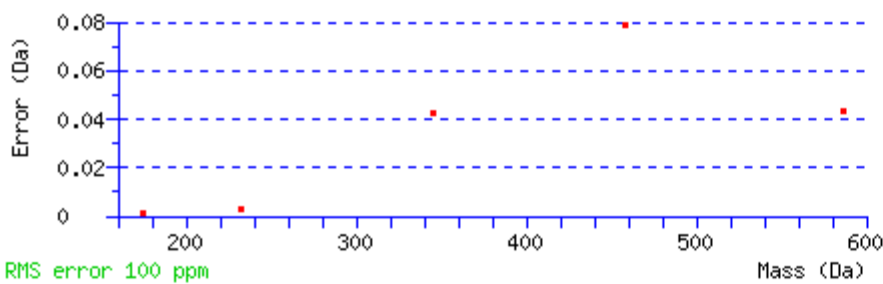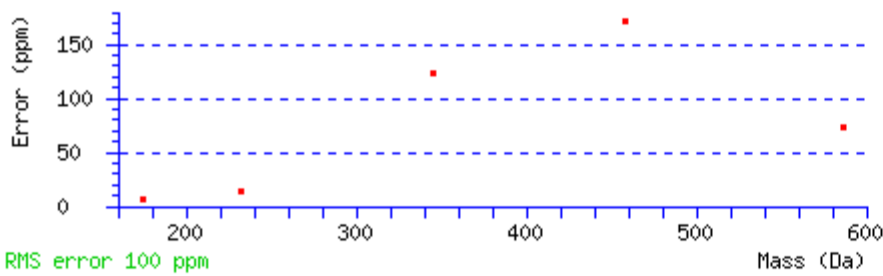

NCBI BLAST search of **TLKPPGR**

(Parameters: blastp, nr protein database, expect=20000, no filter, PAM30)

Other BLAST [web gateways](#)

All matches to this query

| Score | Mr(calc):  | Delta     | Sequence                 |
|-------|------------|-----------|--------------------------|
| 41.4  | 799.455200 | 0.003768  | <a href="#">TLKPPGR</a>  |
| 29.8  | 799.455185 | 0.003783  | <a href="#">DLNILGR</a>  |
| 25.2  | 799.455185 | 0.003783  | <a href="#">AALSPLGR</a> |
| 24.9  | 799.466415 | -0.007447 | <a href="#">VARELGR</a>  |
| 24.9  | 799.455200 | 0.003768  | <a href="#">VLKDPGR</a>  |
| 24.7  | 799.455200 | 0.003768  | <a href="#">LGDLGLGR</a> |
| 21.7  | 799.455200 | 0.003768  | <a href="#">VADLVAGR</a> |
| 19.3  | 799.455185 | 0.003783  | <a href="#">VDAILNR</a>  |
| 13.3  | 799.455200 | 0.003768  | <a href="#">DQLVLGR</a>  |
| 11.6  | 799.455200 | 0.003768  | <a href="#">ITGLSPGR</a> |

# MASCOT Search Results

## Peptide View

MS/MS Fragmentation of **TAALGPDSMGGPVPR**

Found in **YIF1A\_HUMAN**, Protein YIF1A OS=Homo sapiens GN=YIF1A PE=1 SV=2

Match to Query 42755: 1440.699108 from(721.356830,2+) rtinseconds(1709) index(15492)

Title: Locus:1.1.1.1966.48

Data file 2011-11-10 - TFD - EP 4-5.mgf

Click mouse within plot area to zoom in by factor of two about that point

Or, Plot from  to  Da

Label all possible matches  Label matches used for scoring

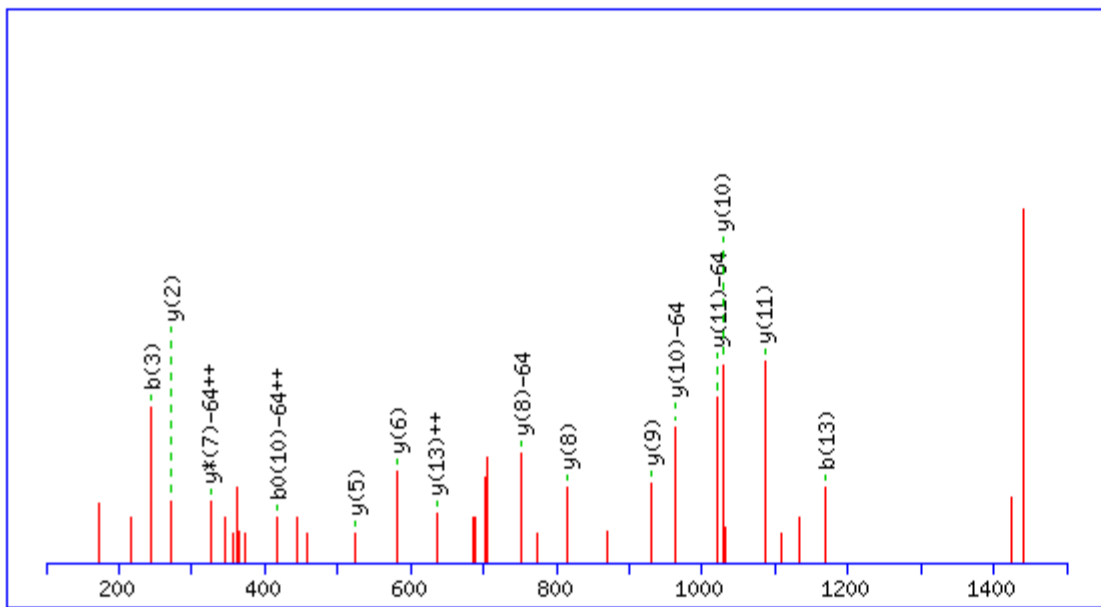

Monoisotopic mass of neutral peptide Mr(calc): 1440.703125

Fixed modifications: Propionamide (C) (apply to specified residues or termini only)

Variable modifications:

M9 : Oxidation (M), with neutral losses 0.000000 (shown in table), 63.998285

Ions Score: 50 Expect: 2.4e-005

Matches : 15/196 fragment ions using 20 most intense peaks ([help](#))

| #  | b                  | b <sup>++</sup> | b <sup>0</sup> | b <sup>0++</sup> | Seq. | y                  | y <sup>++</sup>   | y <sup>*</sup> | y <sup>*++</sup> | y <sup>0</sup> | y <sup>0++</sup> | #  |
|----|--------------------|-----------------|----------------|------------------|------|--------------------|-------------------|----------------|------------------|----------------|------------------|----|
| 1  | 102.054955         | 51.531116       | 84.044390      | 42.525833        | T    |                    |                   |                |                  |                |                  | 15 |
| 2  | 173.092069         | 87.049672       | 155.081504     | 78.044390        | A    | 1340.662713        | 670.834994        | 1323.636164    | 662.321720       | 1322.652148    | 661.829712       | 14 |
| 3  | <b>244.129183</b>  | 122.568229      | 226.118618     | 113.562947       | A    | 1269.625599        | <b>635.316438</b> | 1252.599050    | 626.803163       | 1251.615034    | 626.311155       | 13 |
| 4  | 357.213247         | 179.110261      | 339.202682     | 170.104979       | L    | 1198.588485        | 599.797881        | 1181.561936    | 591.284606       | 1180.577920    | 590.792598       | 12 |
| 5  | 414.234711         | 207.620993      | 396.224146     | 198.615711       | G    | <b>1085.504421</b> | 543.255848        | 1068.477872    | 534.742574       | 1067.493856    | 534.250566       | 11 |
| 6  | 511.287475         | 256.147375      | 493.276910     | 247.142093       | P    | <b>1028.482957</b> | 514.745116        | 1011.456408    | 506.231842       | 1010.472392    | 505.739834       | 10 |
| 7  | 626.314418         | 313.660847      | 608.303853     | 304.655564       | D    | <b>931.430193</b>  | 466.218735        | 914.403644     | 457.705460       | 913.419628     | 457.213452       | 9  |
| 8  | 713.346446         | 357.176861      | 695.335881     | 348.171578       | S    | <b>816.403250</b>  | 408.705263        | 799.376701     | 400.191989       | 798.392685     | 399.699981       | 8  |
| 9  | 860.381846         | 430.694561      | 842.371281     | 421.689278       | M    | 729.371222         | 365.189249        | 712.344673     | 356.675975       |                |                  | 7  |
| 10 | 917.403310         | 459.205293      | 899.392745     | 450.200010       | G    | <b>582.335822</b>  | 291.671549        | 565.309273     | 283.158275       |                |                  | 6  |
| 11 | 974.424774         | 487.716025      | 956.414209     | 478.710742       | G    | <b>525.314358</b>  | 263.160817        | 508.287809     | 254.647543       |                |                  | 5  |
| 12 | 1071.477538        | 536.242407      | 1053.466973    | 527.237124       | P    | 468.292894         | 234.650085        | 451.266345     | 226.136810       |                |                  | 4  |
| 13 | <b>1170.545952</b> | 585.776614      | 1152.535387    | 576.771331       | V    | 371.240130         | 186.123703        | 354.213581     | 177.610429       |                |                  | 3  |
| 14 | 1267.598716        | 634.302996      | 1249.588151    | 625.297713       | P    | <b>272.171716</b>  | 136.589496        | 255.145167     | 128.076221       |                |                  | 2  |
| 15 |                    |                 |                |                  | R    | 175.118952         | 88.063114         | 158.092403     | 79.549839        |                |                  | 1  |

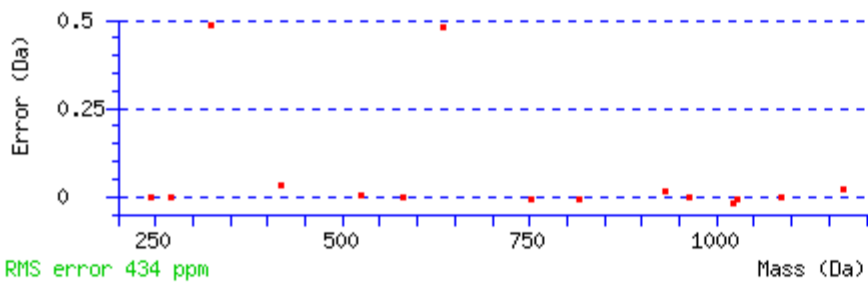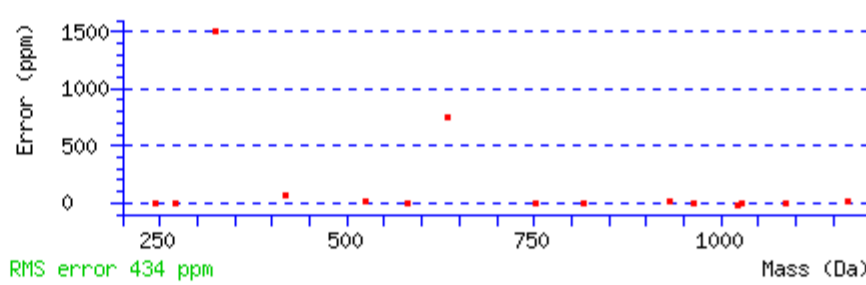

NCBI BLAST search of [TAALGPDSMGGPVPR](#)

(Parameters: blastp, nr protein database, expect=20000, no filter, PAM30)

Other BLAST [web gateways](#)

## All matches to this query

| Score | Mr(calc):   | Delta     | Sequence                          |
|-------|-------------|-----------|-----------------------------------|
| 49.8  | 1440.703125 | -0.004017 | <a href="#">TAALGPDSMGGPVPR</a>   |
| 20.5  | 1440.703125 | -0.004017 | <a href="#">TAALGPDSMGGPVPR</a>   |
| 20.4  | 1440.703125 | -0.004017 | <a href="#">TAALGPDSMGGPVPR</a>   |
| 10.2  | 1440.703125 | -0.004017 | <a href="#">TAALGPDSMGGPVPR</a>   |
| 0.5   | 1440.695724 | 0.003384  | <a href="#">DSGPGAGAGVGELGAAR</a> |

**Peptide View**

MS/MS Fragmentation of **VVNLQYSEVQDR**

Found in **YPEL5\_HUMAN**, Protein yippee-like 5 OS=Homo sapiens GN=YPEL5 PE=2 SV=1

Match to Query 38024: 1448.727528 from(725.371040,2+) rtinseconds(2060) index(16255)

Title: Locus:1.1.1.2240.47

Data file 2011-11-10 - TFD - EP 4-7.mgf

Click mouse within plot area to zoom in by factor of two about that point

Or, Plot from  to  Da

Label all possible matches  Label matches used for scoring

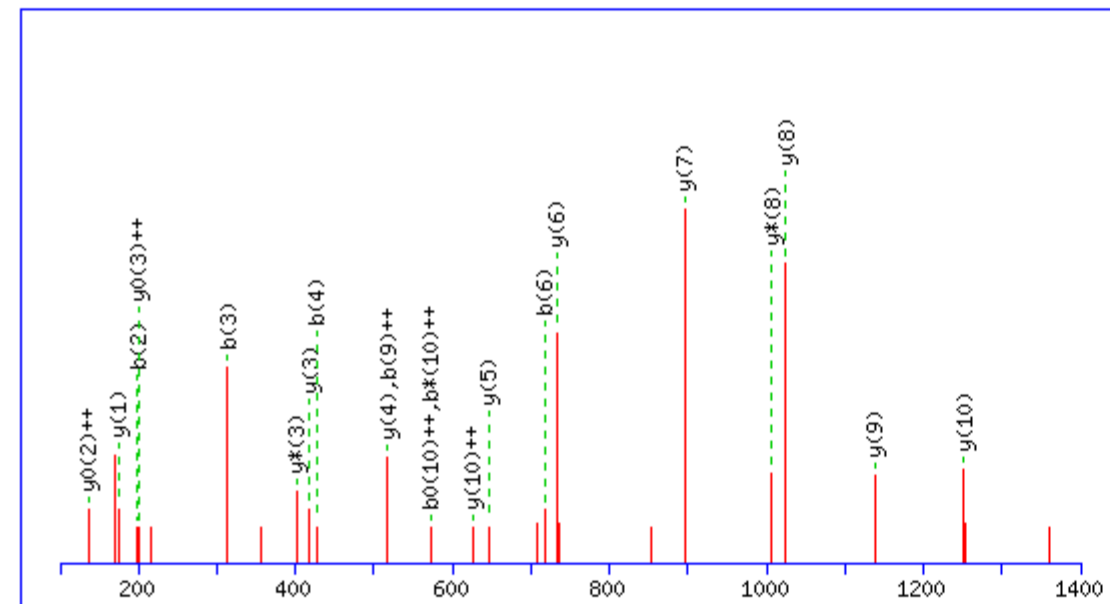

Monoisotopic mass of neutral peptide Mr(calc): 1448.725952

Fixed modifications: Propionamide (C) (apply to specified residues or termini only)

Ions Score: 74 Expect: 1.3e-006

Matches : 21/114 fragment ions using 26 most intense peaks [\(help\)](#)

| #  | b                 | b <sup>++</sup>   | b <sup>*</sup> | b <sup>*++</sup>  | b <sup>0</sup> | b <sup>0++</sup>  | Seq. | y                  | y <sup>++</sup>   | y <sup>*</sup>     | y <sup>*++</sup> | y <sup>0</sup> | y <sup>0++</sup>  | #  |
|----|-------------------|-------------------|----------------|-------------------|----------------|-------------------|------|--------------------|-------------------|--------------------|------------------|----------------|-------------------|----|
| 1  | 100.075690        | 50.541483         |                |                   |                |                   | V    |                    |                   |                    |                  |                |                   | 12 |
| 2  | <b>199.144104</b> | 100.075690        |                |                   |                |                   | V    | 1350.664820        | 675.836048        | 1333.638271        | 667.322774       | 1332.654255    | 666.830766        | 11 |
| 3  | <b>313.187031</b> | 157.097153        | 296.160482     | 148.583879        |                |                   | N    | <b>1251.596406</b> | <b>626.301841</b> | 1234.569857        | 617.788567       | 1233.585841    | 617.296559        | 10 |
| 4  | <b>426.271095</b> | 213.639186        | 409.244546     | 205.125911        |                |                   | L    | <b>1137.553479</b> | 569.280378        | 1120.526930        | 560.767103       | 1119.542914    | 560.275095        | 9  |
| 5  | 554.329673        | 277.668475        | 537.303124     | 269.155200        |                |                   | Q    | <b>1024.469415</b> | 512.738346        | <b>1007.442866</b> | 504.225071       | 1006.458850    | 503.733063        | 8  |
| 6  | <b>717.393002</b> | 359.200139        | 700.366453     | 350.686865        |                |                   | Y    | <b>896.410837</b>  | 448.709057        | 879.384288         | 440.195782       | 878.400272     | 439.703774        | 7  |
| 7  | 804.425030        | 402.716153        | 787.398481     | 394.202879        | 786.414465     | 393.710871        | S    | <b>733.347508</b>  | 367.177392        | 716.320959         | 358.664118       | 715.336943     | 358.172110        | 6  |
| 8  | 933.467623        | 467.237450        | 916.441074     | 458.724175        | 915.457058     | 458.232167        | E    | <b>646.315480</b>  | 323.661378        | 629.288931         | 315.148104       | 628.304915     | 314.656096        | 5  |
| 9  | 1032.536037       | <b>516.771657</b> | 1015.509488    | 508.258382        | 1014.525472    | 507.766374        | V    | <b>517.272887</b>  | 259.140082        | 500.246338         | 250.626807       | 499.262322     | 250.134799        | 4  |
| 10 | 1160.594615       | 580.800946        | 1143.568066    | <b>572.287671</b> | 1142.584050    | <b>571.795663</b> | Q    | <b>418.204473</b>  | 209.605875        | <b>401.177924</b>  | 201.092600       | 400.193908     | <b>200.600592</b> | 3  |
| 11 | 1275.621558       | 638.314417        | 1258.595009    | 629.801143        | 1257.610993    | 629.309135        | D    | 290.145895         | 145.576585        | 273.119346         | 137.063311       | 272.135330     | <b>136.571303</b> | 2  |
| 12 |                   |                   |                |                   |                |                   | R    | <b>175.118952</b>  | 88.063114         | 158.092403         | 79.549839        |                |                   | 1  |

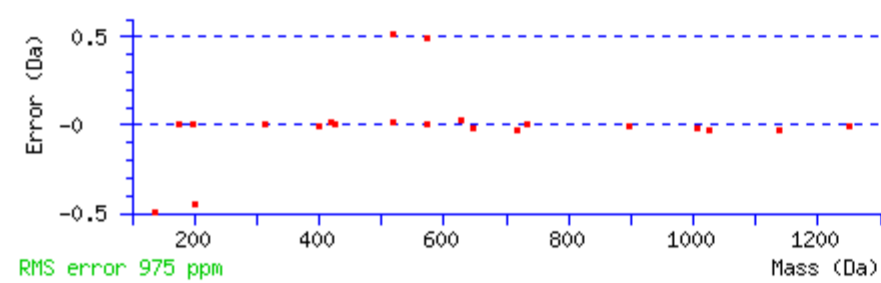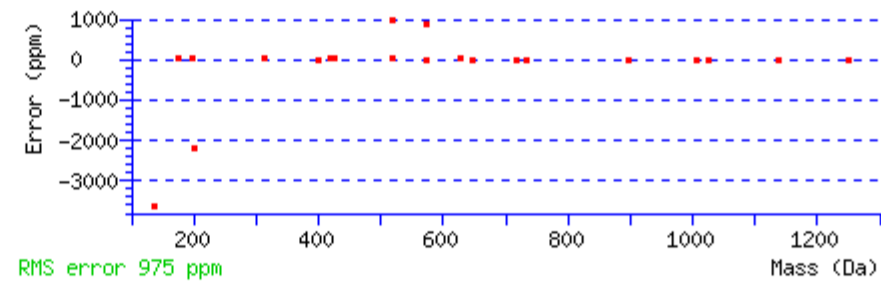

NCBI BLAST search of [VVNLQYSEVQDR](#)

(Parameters: blastp, nr protein database, expect=20000, no filter, PAM30)

Other BLAST [web gateways](#)

**All matches to this query**

| Score | Mr(calc):   | Delta     | Sequence                        |
|-------|-------------|-----------|---------------------------------|
| 74.2  | 1448.725952 | 0.001576  | <a href="#">VVNLQYSEVQDR</a>    |
| 8.8   | 1448.716034 | 0.011494  | <a href="#">GPSAELASRYWGR</a>   |
| 5.5   | 1448.725967 | 0.001561  | <a href="#">GPGLLEPTDAGGPPR</a> |
| 1.4   | 1448.729309 | -0.001781 | <a href="#">MAADTQVSETLKR</a>   |
| 0.3   | 1448.714706 | 0.012822  | <a href="#">GLSIPRADTLDEY</a>   |

# MASCOT Search Results

## Peptide View

MS/MS Fragmentation of **VQLVVG DGR**

Found in **PIMT\_HUMAN**, Protein-L-isoaspartate(D-aspartate) O-methyltransferase OS=Homo sapiens GN=PCMT1 PE=1 SV=4

Match to Query 9381: 941.526548 from(471.770550,2+) rtinseconds(1600) index(15552)

Title: Locus:1.1.1.998.15

Data file 2012-01-27 - TFD - Epitel - IEC - 10ul - 1.mgf

Click mouse within plot area to zoom in by factor of two about that point

Or, Plot from  to  Da

Label all possible matches  Label matches used for scoring

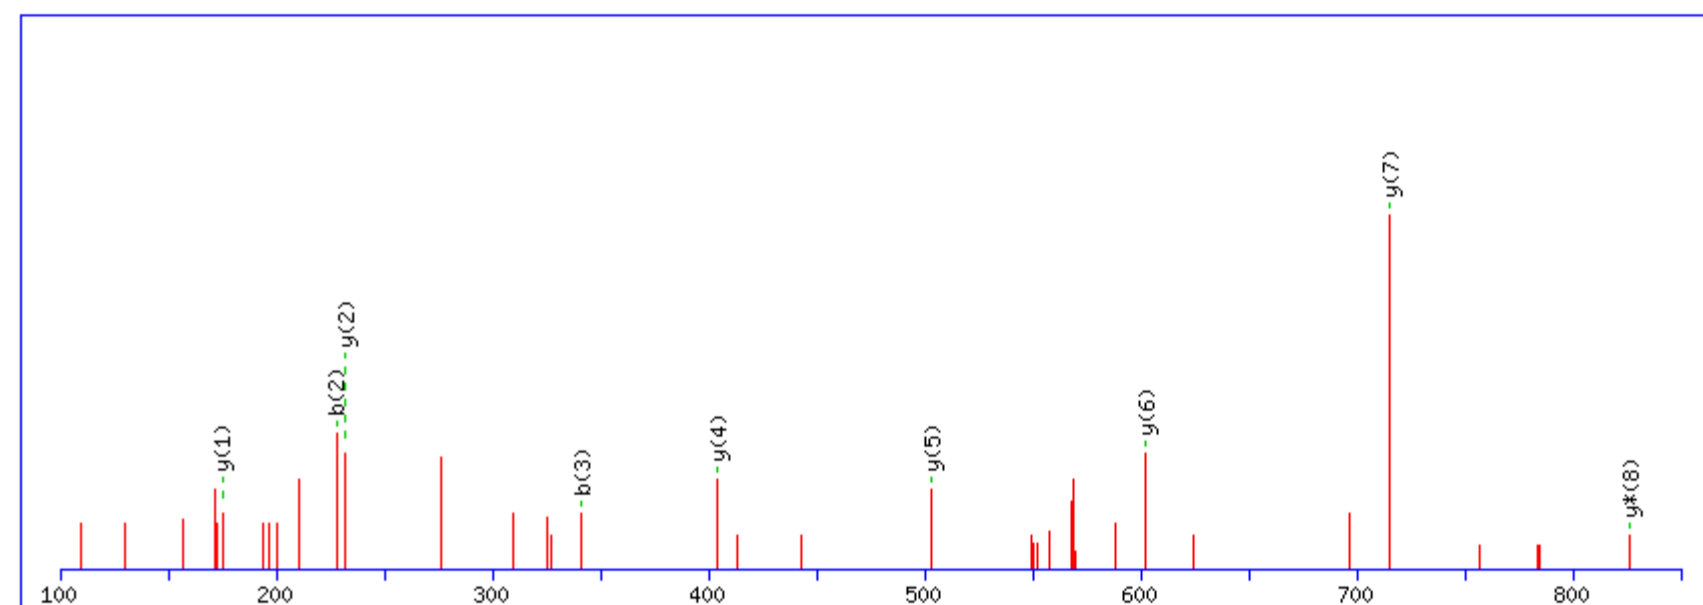

Monoisotopic mass of neutral peptide Mr(calc): 941.529449

Fixed modifications: Carbamidomethyl (C) (apply to specified residues or termini only)

Ions Score: 44 Expect: 0.00046

Matches : 9/78 fragment ions using 15 most intense peaks [\(help\)](#)

| # | b                 | b <sup>++</sup> | b <sup>*</sup> | b <sup>*++</sup> | b <sup>0</sup> | b <sup>0++</sup> | Seq. | y                 | y <sup>++</sup> | y <sup>*</sup>    | y <sup>*++</sup> | y <sup>0</sup> | y <sup>0++</sup> | # |
|---|-------------------|-----------------|----------------|------------------|----------------|------------------|------|-------------------|-----------------|-------------------|------------------|----------------|------------------|---|
| 1 | 100.075690        | 50.541483       |                |                  |                |                  | V    |                   |                 |                   |                  |                |                  | 9 |
| 2 | <b>228.134268</b> | 114.570772      | 211.107719     | 106.057498       |                |                  | Q    | 843.468293        | 422.237785      | <b>826.441744</b> | 413.724510       | 825.457728     | 413.232502       | 8 |
| 3 | <b>341.218332</b> | 171.112804      | 324.191783     | 162.599530       |                |                  | L    | <b>715.409715</b> | 358.208496      | 698.383166        | 349.695221       | 697.399150     | 349.203213       | 7 |
| 4 | 440.286746        | 220.647011      | 423.260197     | 212.133737       |                |                  | V    | <b>602.325651</b> | 301.666464      | 585.299102        | 293.153189       | 584.315086     | 292.661181       | 6 |
| 5 | 539.355160        | 270.181218      | 522.328611     | 261.667944       |                |                  | V    | <b>503.257237</b> | 252.132257      | 486.230688        | 243.618982       | 485.246672     | 243.126974       | 5 |
| 6 | 596.376624        | 298.691950      | 579.350075     | 290.178676       |                |                  | G    | <b>404.188823</b> | 202.598050      | 387.162274        | 194.084775       | 386.178258     | 193.592767       | 4 |
| 7 | 711.403567        | 356.205422      | 694.377018     | 347.692147       | 693.393002     | 347.200139       | D    | 347.167359        | 174.087318      | 330.140810        | 165.574043       | 329.156794     | 165.082035       | 3 |
| 8 | 768.425031        | 384.716154      | 751.398482     | 376.202879       | 750.414466     | 375.710871       | G    | <b>232.140416</b> | 116.573846      | 215.113867        | 108.060572       |                |                  | 2 |
| 9 |                   |                 |                |                  |                |                  | R    | <b>175.118952</b> | 88.063114       | 158.092403        | 79.549840        |                |                  | 1 |

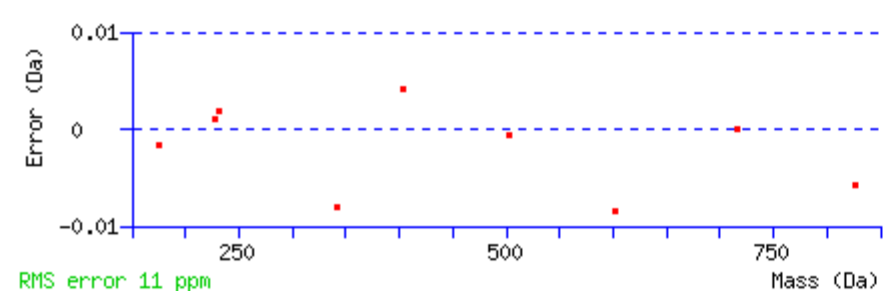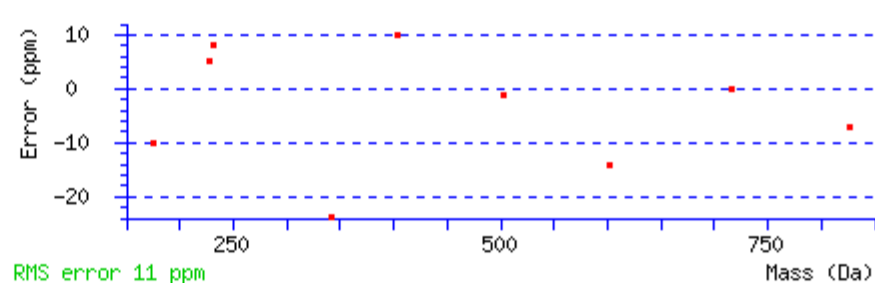

NCBI BLAST search of **VQLVVG DGR**

(Parameters: blastp, nr protein database, expect=20000, no filter, PAM30)

Other BLAST [web gateways](#)

All matches to this query

| Score | Mr(calc):  | Delta     | Sequence                   |
|-------|------------|-----------|----------------------------|
| 44.1  | 941.529449 | -0.002901 | <a href="#">VQLVVG DGR</a> |
| 8.1   | 941.529404 | -0.002856 | <a href="#">ARPEVNLK</a>   |
| 7.9   | 941.529404 | -0.002856 | <a href="#">LNIQGLER</a>   |
| 7.9   | 941.529404 | -0.002856 | <a href="#">LNPADIKR</a>   |
| 4.3   | 941.529434 | -0.002886 | <a href="#">AGVQSLVPR</a>  |
| 3.0   | 941.529419 | -0.002871 | <a href="#">GPSIPAKTR</a>  |
| 2.7   | 941.529434 | -0.002886 | <a href="#">VNLVLGDGR</a>  |
| 2.1   | 941.529404 | -0.002856 | <a href="#">KEPALTAGR</a>  |
| 2.0   | 941.533447 | -0.006899 | <a href="#">FILPAPPR</a>   |
| 2.0   | 941.533447 | -0.006899 | <a href="#">FILPAPPR</a>   |

**Peptide View**

MS/MS Fragmentation of **GQPSVLQVVNLPIVERPVCK**  
 Found in **THRB\_HUMAN**, Prothrombin OS=Homo sapiens GN=F2 PE=1 SV=2

Match to Query 68142: 2245.265442 from(749.429090,3+) rtinseconds(3328) index(46687)  
 Title: Locus:1.1.1.2651.35  
 Data file 2011-11-12 - TFD - EP 6-2.mgf

Click mouse within plot area to zoom in by factor of two about that point

Or, Plot from 0 to 2200 Da Full range

Label all possible matches  Label matches used for scoring

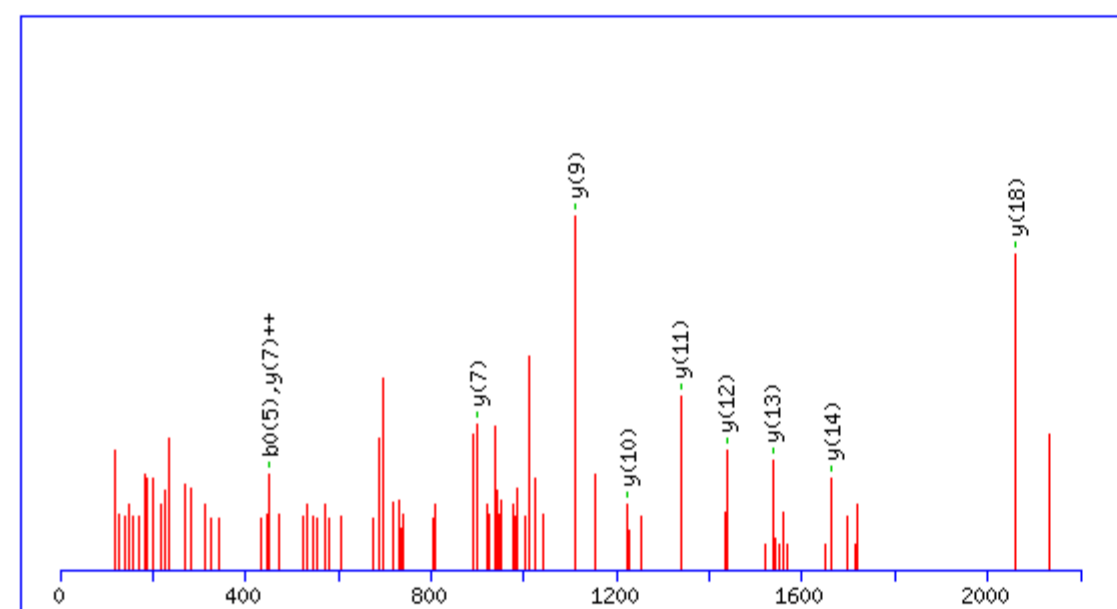

Monoisotopic mass of neutral peptide Mr(calc): 2245.261658  
 Fixed modifications: Propionamide (C) (apply to specified residues or termini only)  
 Ions Score: 38 Expect: 0.00034  
 Matches : 10/210 fragment ions using 18 most intense peaks ([help](#))

| #  | b           | b <sup>++</sup> | b <sup>*</sup> | b <sup>*++</sup> | b <sup>0</sup>    | b <sup>0++</sup> | Seq. | y                  | y <sup>++</sup>   | y <sup>*</sup> | y <sup>*++</sup> | y <sup>0</sup> | y <sup>0++</sup> | #  |
|----|-------------|-----------------|----------------|------------------|-------------------|------------------|------|--------------------|-------------------|----------------|------------------|----------------|------------------|----|
| 1  | 58.028740   | 29.518008       |                |                  |                   |                  | G    |                    |                   |                |                  |                |                  | 20 |
| 2  | 186.087318  | 93.547297       | 169.060769     | 85.034023        |                   |                  | Q    | 2189.247472        | 1095.127374       | 2172.220923    | 1086.614099      | 2171.236907    | 1086.122091      | 19 |
| 3  | 283.140082  | 142.073679      | 266.113533     | 133.560405       |                   |                  | P    | <b>2061.188894</b> | 1031.098085       | 2044.162345    | 1022.584810      | 2043.178329    | 1022.092802      | 18 |
| 4  | 370.172110  | 185.589693      | 353.145561     | 177.076419       | 352.161545        | 176.584411       | S    | 1964.136130        | 982.571703        | 1947.109581    | 974.058428       | 1946.125565    | 973.566420       | 17 |
| 5  | 469.240524  | 235.123900      | 452.213975     | 226.610626       | <b>451.229959</b> | 226.118618       | V    | 1877.104102        | 939.055689        | 1860.077553    | 930.542414       | 1859.093537    | 930.050406       | 16 |
| 6  | 582.324588  | 291.665932      | 565.298039     | 283.152658       | 564.314023        | 282.660650       | L    | 1778.035688        | 889.521482        | 1761.009139    | 881.008207       | 1760.025123    | 880.516199       | 15 |
| 7  | 710.383166  | 355.695221      | 693.356617     | 347.181947       | 692.372601        | 346.689939       | Q    | <b>1664.951624</b> | 832.979450        | 1647.925075    | 824.466175       | 1646.941059    | 823.974167       | 14 |
| 8  | 809.451580  | 405.229428      | 792.425031     | 396.716154       | 791.441015        | 396.224146       | V    | <b>1536.893046</b> | 768.950161        | 1519.866497    | 760.436886       | 1518.882481    | 759.944878       | 13 |
| 9  | 908.519994  | 454.763635      | 891.493445     | 446.250361       | 890.509429        | 445.758353       | V    | <b>1437.824632</b> | 719.415954        | 1420.798083    | 710.902679       | 1419.814067    | 710.410671       | 12 |
| 10 | 1022.562921 | 511.785099      | 1005.536372    | 503.271824       | 1004.552356       | 502.779816       | N    | <b>1338.756218</b> | 669.881747        | 1321.729669    | 661.368472       | 1320.745653    | 660.876464       | 11 |
| 11 | 1135.646985 | 568.327130      | 1118.620436    | 559.813856       | 1117.636420       | 559.321848       | L    | <b>1224.713291</b> | 612.860283        | 1207.686742    | 604.347009       | 1206.702726    | 603.855001       | 10 |
| 12 | 1232.699749 | 616.853512      | 1215.673200    | 608.340238       | 1214.689184       | 607.848230       | P    | <b>1111.629227</b> | 556.318251        | 1094.602678    | 547.804977       | 1093.618662    | 547.312969       | 9  |
| 13 | 1345.783813 | 673.395544      | 1328.757264    | 664.882270       | 1327.773248       | 664.390262       | I    | 1014.576463        | 507.791869        | 997.549914     | 499.278595       | 996.565898     | 498.786587       | 8  |
| 14 | 1444.852227 | 722.929751      | 1427.825678    | 714.416477       | 1426.841662       | 713.924469       | V    | <b>901.492399</b>  | <b>451.249838</b> | 884.465850     | 442.736563       | 883.481834     | 442.244555       | 7  |
| 15 | 1573.894820 | 787.451048      | 1556.868271    | 778.937773       | 1555.884255       | 778.445765       | E    | 802.423985         | 401.715630        | 785.397436     | 393.202356       | 784.413420     | 392.710348       | 6  |
| 16 | 1729.995931 | 865.501603      | 1712.969382    | 856.988329       | 1711.985366       | 856.496321       | R    | 673.381392         | 337.194334        | 656.354843     | 328.681060       |                |                  | 5  |
| 17 | 1827.048695 | 914.027985      | 1810.022146    | 905.514711       | 1809.038130       | 905.022703       | P    | 517.280281         | 259.143779        | 500.253732     | 250.630504       |                |                  | 4  |
| 18 | 1926.117109 | 963.562192      | 1909.090560    | 955.048918       | 1908.106544       | 954.556910       | V    | 420.227517         | 210.617396        | 403.200968     | 202.104122       |                |                  | 3  |
| 19 | 2100.163408 | 1050.585342     | 2083.136859    | 1042.072067      | 2082.152843       | 1041.580059      | C    | 321.159103         | 161.083189        | 304.132554     | 152.569915       |                |                  | 2  |
| 20 |             |                 |                |                  |                   |                  | K    | 147.112804         | 74.060040         | 130.086255     | 65.546765        |                |                  | 1  |

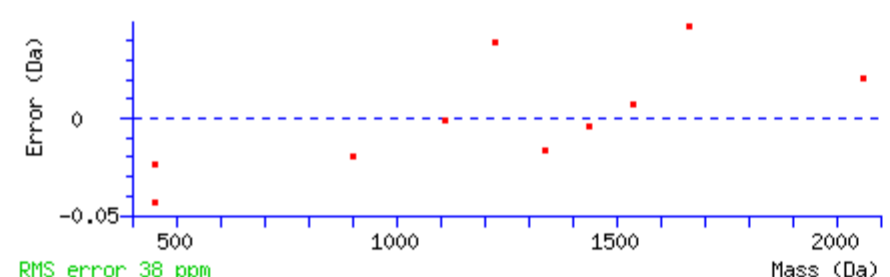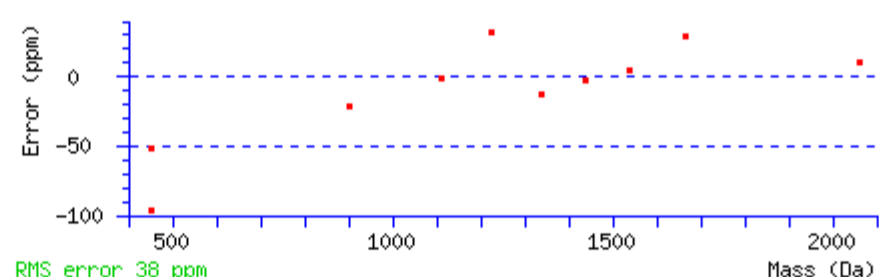

NCBI BLAST search of [GQPSVLQVVNLPIVERPVCK](#)  
 (Parameters: blastp, nr protein database, expect=20000, no filter, PAM30)  
 Other BLAST [web gateways](#)

**All matches to this query**

| Score | Mr(calc):   | Delta    | Sequence                             |
|-------|-------------|----------|--------------------------------------|
| 37.6  | 2245.261658 | 0.003784 | <a href="#">GQPSVLQVVNLPIVERPVCK</a> |

# Mascot Search Results

## Peptide View

MS/MS Fragmentation of **VTVLDTNDNAPK**

Found in **PCDH1\_HUMAN**, Protocadherin-1 OS=Homo sapiens GN=PCDH1 PE=1 SV=2

Match to Query 31499: 1285.650728 from(643.832640,2+) rtinseconds(1555) index(11268)

Title: Locus:1.1.1.2154.45

Data file 2011-11-12 - TFD - EP 5-1.mgf

Click mouse within plot area to zoom in by factor of two about that point

Or, Plot from  to  Da

Label all possible matches  Label matches used for scoring

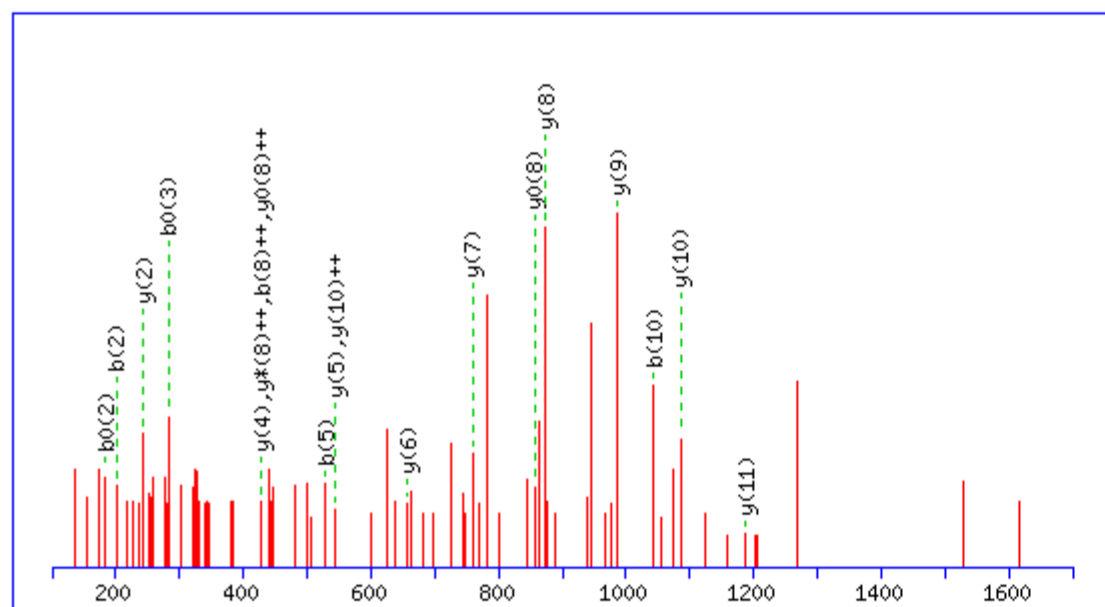

Monoisotopic mass of neutral peptide  $M_r(\text{calc})$ : 1285.651398

Fixed modifications: Propionamide (C) (apply to specified residues or termini only)

Ions Score: 46 Expect: 0.00031

Matches : 19/110 fragment ions using 45 most intense peaks ([help](#))

| #  | b                  | b <sup>++</sup>   | b <sup>*</sup> | b <sup>*++</sup> | b <sup>0</sup>    | b <sup>0++</sup> | Seq. | y                  | y <sup>++</sup>   | y <sup>*</sup> | y <sup>*++</sup>  | y <sup>0</sup>    | y <sup>0++</sup>  | #  |
|----|--------------------|-------------------|----------------|------------------|-------------------|------------------|------|--------------------|-------------------|----------------|-------------------|-------------------|-------------------|----|
| 1  | 100.075690         | 50.541483         |                |                  |                   |                  | V    |                    |                   |                |                   |                   |                   | 12 |
| 2  | <b>201.123369</b>  | 101.065322        |                |                  | 183.112804        | 92.060040        | T    | <b>1187.590258</b> | 594.298767        | 1170.563709    | 585.785493        | 1169.579693       | 585.293484        | 11 |
| 3  | 300.191783         | 150.599529        |                |                  | <b>282.181218</b> | 141.594247       | V    | <b>1086.542579</b> | <b>543.774927</b> | 1069.516030    | 535.261653        | 1068.532014       | 534.769645        | 10 |
| 4  | 413.275847         | 207.141561        |                |                  | 395.265282        | 198.136279       | L    | <b>987.474165</b>  | 494.240721        | 970.447616     | 485.727446        | 969.463600        | 485.235438        | 9  |
| 5  | <b>528.302790</b>  | 264.655033        |                |                  | 510.292225        | 255.649751       | D    | <b>874.390101</b>  | 437.698689        | 857.363552     | <b>429.185414</b> | <b>856.379536</b> | <b>428.693406</b> | 8  |
| 6  | 629.350469         | 315.178873        |                |                  | 611.339904        | 306.173590       | T    | <b>759.363158</b>  | 380.185217        | 742.336609     | 371.671943        | 741.352593        | 371.179935        | 7  |
| 7  | 743.393396         | 372.200336        | 726.366847     | 363.687062       | 725.382831        | 363.195054       | N    | <b>658.315479</b>  | 329.661378        | 641.288930     | 321.148103        | 640.304914        | 320.656095        | 6  |
| 8  | 858.420339         | <b>429.713808</b> | 841.393790     | 421.200533       | 840.409774        | 420.708525       | D    | <b>544.272552</b>  | 272.639914        | 527.246003     | 264.126640        | 526.261987        | 263.634632        | 5  |
| 9  | 972.463266         | 486.735271        | 955.436717     | 478.221996       | 954.452701        | 477.729988       | N    | <b>429.245609</b>  | 215.126442        | 412.219060     | 206.613168        |                   |                   | 4  |
| 10 | <b>1043.500380</b> | 522.253828        | 1026.473831    | 513.740554       | 1025.489815       | 513.248545       | A    | 315.202682         | 158.104979        | 298.176133     | 149.591704        |                   |                   | 3  |
| 11 | 1140.553144        | 570.780210        | 1123.526595    | 562.266936       | 1122.542579       | 561.774927       | P    | <b>244.165568</b>  | 122.586422        | 227.139019     | 114.073148        |                   |                   | 2  |
| 12 |                    |                   |                |                  |                   |                  | K    | 147.112804         | 74.060040         | 130.086255     | 65.546765         |                   |                   | 1  |

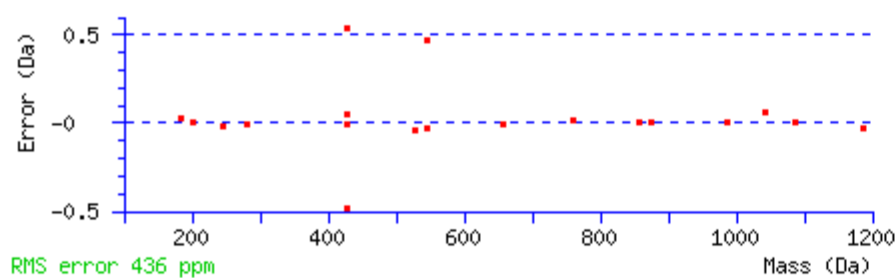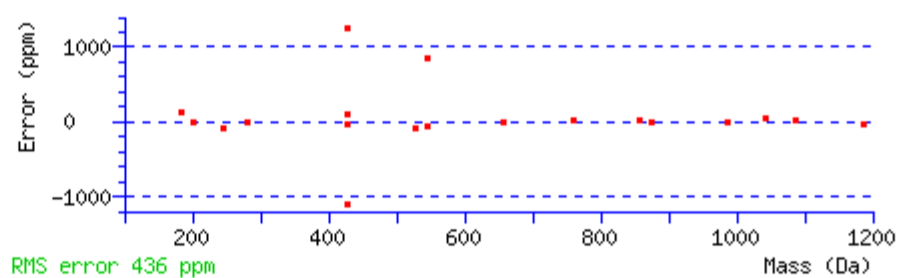

NCBI BLAST search of **VTVLDTNDNAPK**

(Parameters: blastp, nr protein database, expect=20000, no filter, PAM30)

Other BLAST [web gateways](#)

All matches to this query

| Score | $M_r(\text{calc})$ : | Delta     | Sequence                     |
|-------|----------------------|-----------|------------------------------|
| 46.4  | 1285.651398          | -0.000670 | <a href="#">VTVLDTNDNAPK</a> |
| 15.2  | 1285.641510          | 0.009218  | <a href="#">QDVYGPQPQVR</a>  |

# MASCOT SCIENCE Mascot Search Results

## Peptide View

MS/MS Fragmentation of **LLLGATLPR**

Found in **MOS\_HUMAN**, Proto-oncogene serine/threonine-protein kinase mos OS=Homo sapiens GN=MOS PE=2 SV=1

Match to Query 13140: 952.599748 from(477.307150,2+) rtinseconds(3129) index(40370)

Title: Locus:1.1.1.2465.7

Data file 2011-11-14 - TFD - EP 8-6.mgf

Click mouse within plot area to zoom in by factor of two about that point

Or, Plot from  to  Da

Label all possible matches  Label matches used for scoring

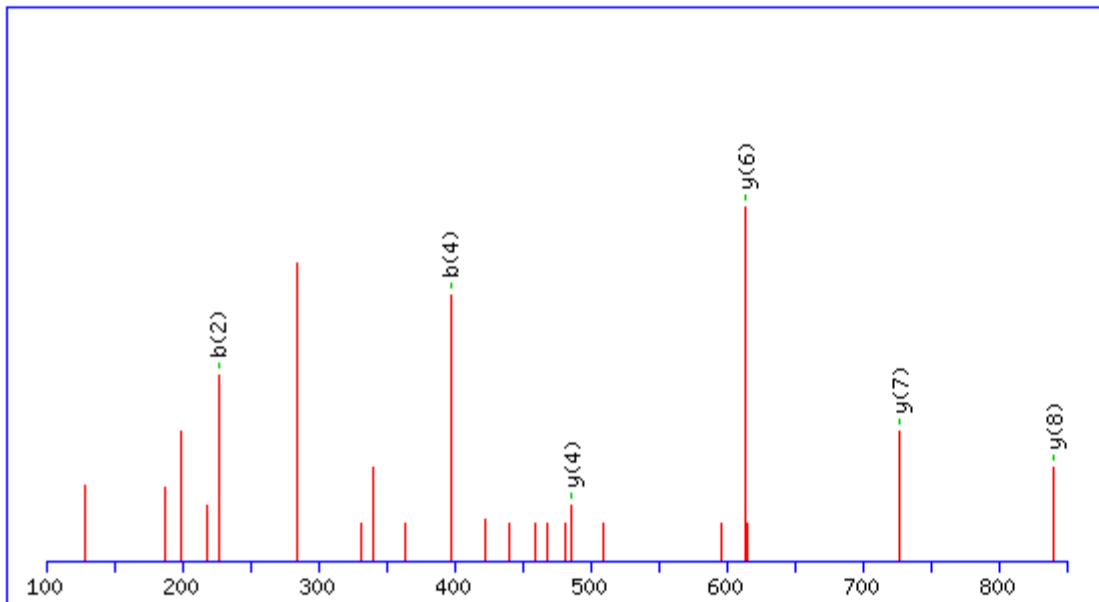

Monoisotopic mass of neutral peptide  $M_r(\text{calc})$ : 952.606934

Fixed modifications: Propionamide (C) (apply to specified residues or termini only)

Ions Score: 34 Expect: 0.00096

Matches : 6/64 fragment ions using 7 most intense peaks [\(help\)](#)

| # | b                 | b <sup>++</sup> | b <sup>0</sup> | b <sup>0++</sup> | Seq. | y                 | y <sup>++</sup> | y <sup>*</sup> | y <sup>+++</sup> | y <sup>0</sup> | y <sup>0++</sup> | # |
|---|-------------------|-----------------|----------------|------------------|------|-------------------|-----------------|----------------|------------------|----------------|------------------|---|
| 1 | 114.091340        | 57.549308       |                |                  | L    |                   |                 |                |                  |                |                  | 9 |
| 2 | <b>227.175404</b> | 114.091340      |                |                  | L    | <b>840.530165</b> | 420.768721      | 823.503616     | 412.255446       | 822.519600     | 411.763438       | 8 |
| 3 | 340.259468        | 170.633372      |                |                  | L    | <b>727.446101</b> | 364.226689      | 710.419552     | 355.713414       | 709.435536     | 355.221406       | 7 |
| 4 | <b>397.280932</b> | 199.144104      |                |                  | G    | <b>614.362037</b> | 307.684657      | 597.335488     | 299.171382       | 596.351472     | 298.679374       | 6 |
| 5 | 468.318046        | 234.662661      |                |                  | A    | 557.340573        | 279.173925      | 540.314024     | 270.660650       | 539.330008     | 270.168642       | 5 |
| 6 | 569.365725        | 285.186501      | 551.355160     | 276.181218       | T    | <b>486.303459</b> | 243.655367      | 469.276910     | 235.142093       | 468.292894     | 234.650085       | 4 |
| 7 | 682.449789        | 341.728533      | 664.439224     | 332.723250       | L    | 385.255780        | 193.131528      | 368.229231     | 184.618253       |                |                  | 3 |
| 8 | 779.502553        | 390.254915      | 761.491988     | 381.249632       | P    | 272.171716        | 136.589496      | 255.145167     | 128.076221       |                |                  | 2 |
| 9 |                   |                 |                |                  | R    | 175.118952        | 88.063114       | 158.092403     | 79.549839        |                |                  | 1 |

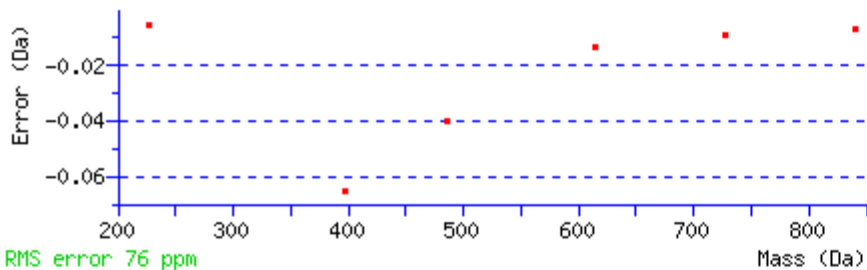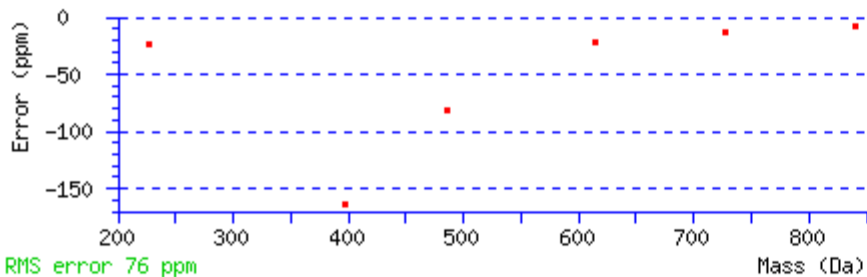

NCBI BLAST search of [LLLGATLPR](#)

(Parameters: blastp, nr protein database, expect=20000, no filter, PAM30)

Other BLAST [web gateways](#)

## All matches to this query

| Score | $M_r(\text{calc})$ : | Delta     | Sequence                  |
|-------|----------------------|-----------|---------------------------|
| 37.5  | 952.595688           | 0.004060  | <a href="#">LLLPGELAK</a> |
| 34.0  | 952.606934           | -0.007186 | <a href="#">LLLGATLPR</a> |
| 29.1  | 952.595688           | 0.004060  | <a href="#">LLIKEPPK</a>  |
| 25.7  | 952.595688           | 0.004060  | <a href="#">LLIKEPPK</a>  |
| 22.2  | 952.595688           | 0.004060  | <a href="#">IIPPEIQK</a>  |
| 21.6  | 952.595703           | 0.004045  | <a href="#">ILGILPPSK</a> |
| 21.2  | 952.595703           | 0.004045  | <a href="#">ILGILPPSK</a> |
| 20.0  | 952.595688           | 0.004060  | <a href="#">ILLEAGPK</a>  |
| 15.5  | 952.606934           | -0.007186 | <a href="#">EPLKVVLR</a>  |
| 14.4  | 952.606918           | -0.007170 | <a href="#">LILPNKQK</a>  |

**MATRIX SCIENCE Mascot Search Results**

**Peptide View**

MS/MS Fragmentation of **FSPPPAMEK**

Found in **HDHD1\_HUMAN**, Pseudouridine-5'-monophosphatase OS=Homo sapiens GN=HDHD1 PE=1 SV=3

Match to Query 17744: 1018.487268 from(510.250910,2+) rtinseconds(1210) index(5938)

Title: Locus:1.1.1.1775.28

Data file 2011-11-10 - TFD - EP 4-5.mgf

Click mouse within plot area to zoom in by factor of two about that point

Or, Plot from  to  Da

Label all possible matches  Label matches used for scoring

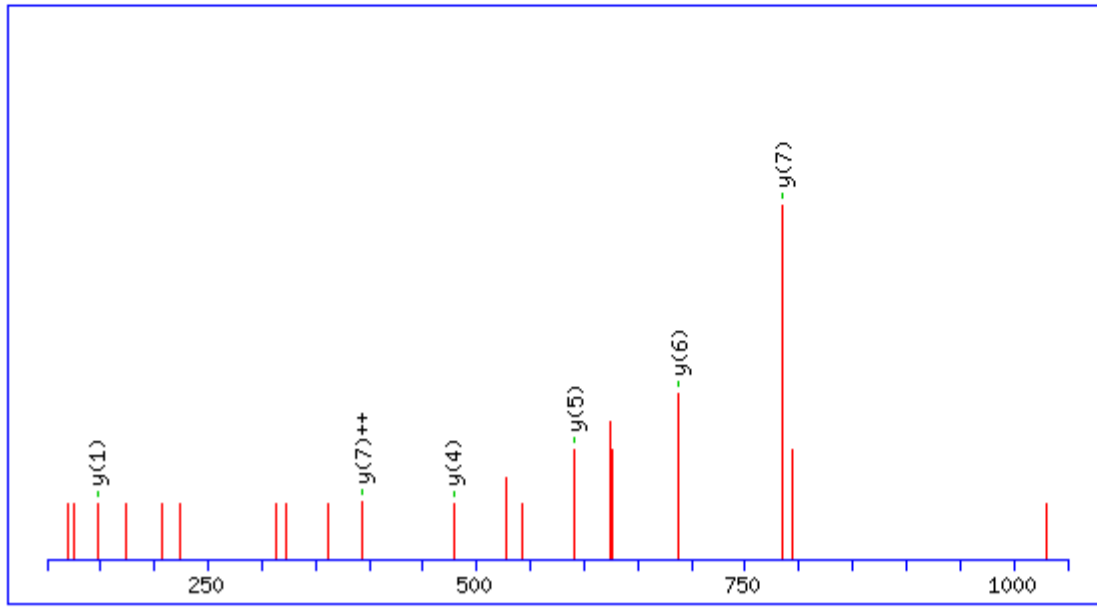

Monoisotopic mass of neutral peptide Mr(calc): 1018.479355

Fixed modifications: Propionamide (C) (apply to specified residues or termini only)

Variable modifications:

P5 : Oxidation (P)

Ions Score: 40 Expect: 0.0011

Matches : 6/76 fragment ions using 7 most intense peaks [\(help\)](#)

| # | b          | b <sup>++</sup> | b <sup>0</sup> | b <sup>0++</sup> | Seq. | y                 | y <sup>++</sup>   | y <sup>*</sup> | y <sup>*++</sup> | y <sup>0</sup> | y <sup>0++</sup> | # |
|---|------------|-----------------|----------------|------------------|------|-------------------|-------------------|----------------|------------------|----------------|------------------|---|
| 1 | 148.075690 | 74.541483       |                |                  | F    |                   |                   |                |                  |                |                  | 9 |
| 2 | 235.107718 | 118.057497      | 217.097153     | 109.052214       | S    | 872.418231        | 436.712754        | 855.391682     | 428.199479       | 854.407666     | 427.707471       | 8 |
| 3 | 332.160482 | 166.583879      | 314.149917     | 157.578596       | P    | <b>785.386203</b> | <b>393.196740</b> | 768.359654     | 384.683465       | 767.375638     | 384.191457       | 7 |
| 4 | 429.213246 | 215.110261      | 411.202681     | 206.104978       | P    | <b>688.333439</b> | 344.670358        | 671.306890     | 336.157083       | 670.322874     | 335.665075       | 6 |
| 5 | 542.260925 | 271.634101      | 524.250360     | 262.628818       | P    | <b>591.280675</b> | 296.143976        | 574.254126     | 287.630701       | 573.270110     | 287.138693       | 5 |
| 6 | 613.298039 | 307.152658      | 595.287474     | 298.147375       | A    | <b>478.232996</b> | 239.620136        | 461.206447     | 231.106861       | 460.222431     | 230.614853       | 4 |
| 7 | 744.338524 | 372.672900      | 726.327959     | 363.667618       | M    | 407.195882        | 204.101579        | 390.169333     | 195.588304       | 389.185317     | 195.096296       | 3 |
| 8 | 873.381117 | 437.194197      | 855.370552     | 428.188914       | E    | 276.155397        | 138.581336        | 259.128848     | 130.068062       | 258.144832     | 129.576054       | 2 |
| 9 |            |                 |                |                  | K    | <b>147.112804</b> | 74.060040         | 130.086255     | 65.546765        |                |                  | 1 |

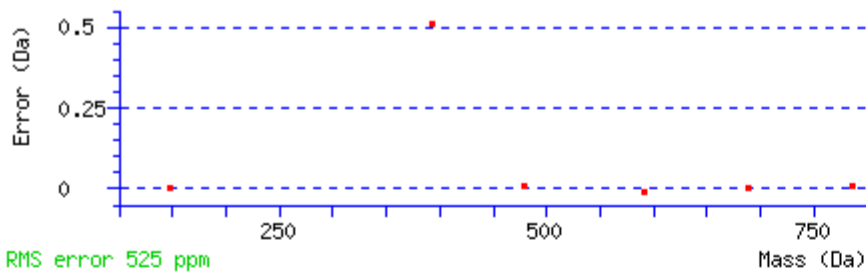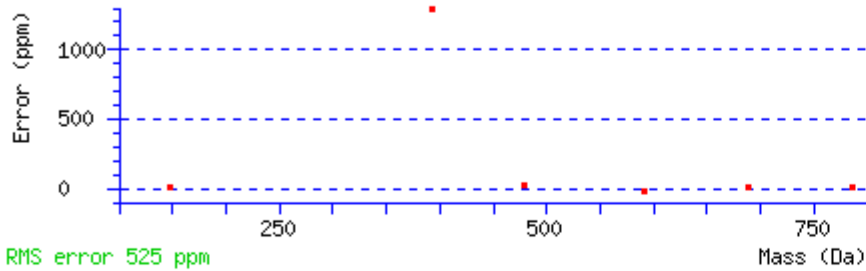

NCBI BLAST search of [FSPPPAMEK](#)

(Parameters: blastp, nr protein database, expect=20000, no filter, PAM30)

Other BLAST [web gateways](#)

**All matches to this query**

| Score | Mr(calc):   | Delta    | Sequence                  |
|-------|-------------|----------|---------------------------|
| 39.8  | 1018.479355 | 0.007913 | <a href="#">FSPPPAMEK</a> |
| 28.9  | 1018.479355 | 0.007913 | <a href="#">FSPPPAMEK</a> |
| 24.8  | 1018.479355 | 0.007913 | <a href="#">FSPPPAMEK</a> |
| 12.1  | 1018.479355 | 0.007913 | <a href="#">FSPPPAMEK</a> |



# MASCOT SEARCH RESULTS

## Peptide View

### MS/MS Fragmentation of QNRPIPQWIR

Found in **R39L5\_HUMAN**, Putative 60S ribosomal protein L39-like 5 OS=Homo sapiens GN=RPL39P5 PE=5 SV=2

Match to Query 31350: 1306.726572 from(436.582800,3+) rtinseconds(2221) index(20599)

Title: Locus:1.1.1.2297.8

Data file 2011-11-13 - TFD - EP 7-7.mgf

Click mouse within plot area to zoom in by factor of two about that point

Or, Plot from  to  Da

Label all possible matches  Label matches used for scoring

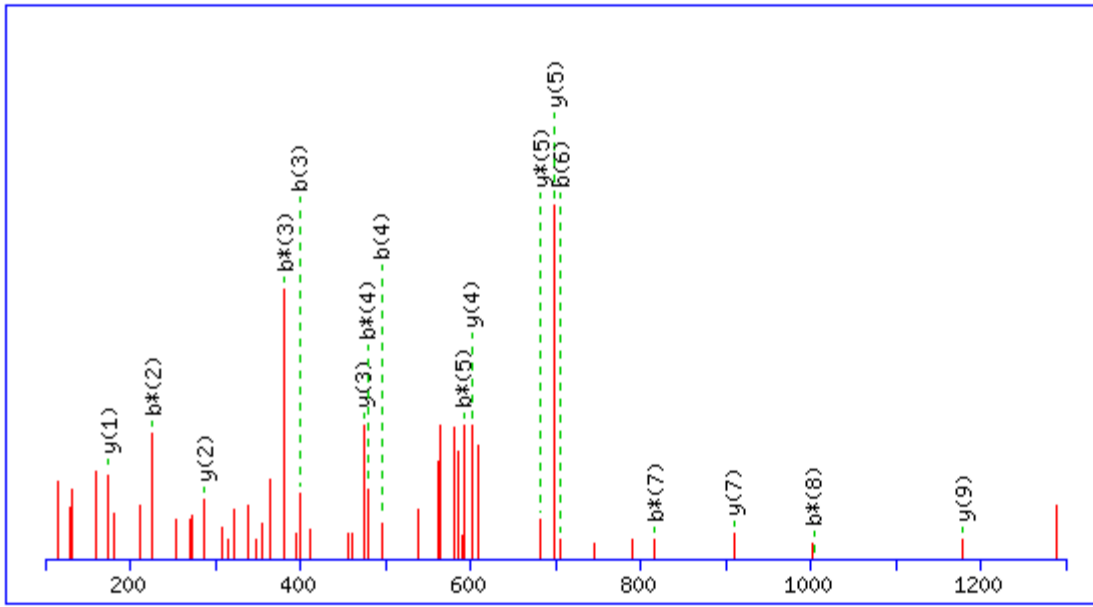

Monoisotopic mass of neutral peptide Mr(calc): 1306.725815

Fixed modifications: Propionamide (C) (apply to specified residues or termini only)

Ions Score: 52 Expect: 1.7e-005

Matches : 17/72 fragment ions using 25 most intense peaks ([help](#))

| #  | b           | b <sup>++</sup> | b <sup>*</sup> | b <sup>***</sup> | Seq. | y           | y <sup>++</sup> | y <sup>*</sup> | y <sup>***</sup> | #  |
|----|-------------|-----------------|----------------|------------------|------|-------------|-----------------|----------------|------------------|----|
| 1  | 129.065854  | 65.036565       | 112.039305     | 56.523291        | Q    |             |                 |                |                  | 10 |
| 2  | 243.108781  | 122.058029      | 226.082232     | 113.544754       | N    | 1179.674537 | 590.340907      | 1162.647988    | 581.827632       | 9  |
| 3  | 399.209892  | 200.108584      | 382.183343     | 191.595310       | R    | 1065.631610 | 533.319443      | 1048.605061    | 524.806169       | 8  |
| 4  | 496.262656  | 248.634966      | 479.236107     | 240.121692       | P    | 909.530499  | 455.268888      | 892.503950     | 446.755613       | 7  |
| 5  | 609.346720  | 305.176998      | 592.320171     | 296.663724       | I    | 812.477735  | 406.742505      | 795.451186     | 398.229231       | 6  |
| 6  | 706.399484  | 353.703380      | 689.372935     | 345.190106       | P    | 699.393671  | 350.200473      | 682.367122     | 341.687199       | 5  |
| 7  | 834.458062  | 417.732669      | 817.431513     | 409.219395       | Q    | 602.340907  | 301.674091      | 585.314358     | 293.160817       | 4  |
| 8  | 1020.537375 | 510.772326      | 1003.510826    | 502.259051       | W    | 474.282329  | 237.644802      | 457.255780     | 229.131528       | 3  |
| 9  | 1133.621439 | 567.314358      | 1116.594890    | 558.801083       | I    | 288.203016  | 144.605146      | 271.176467     | 136.091871       | 2  |
| 10 |             |                 |                |                  | R    | 175.118952  | 88.063114       | 158.092403     | 79.549839        | 1  |

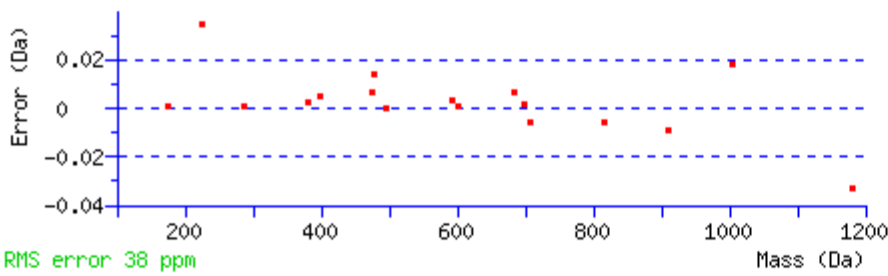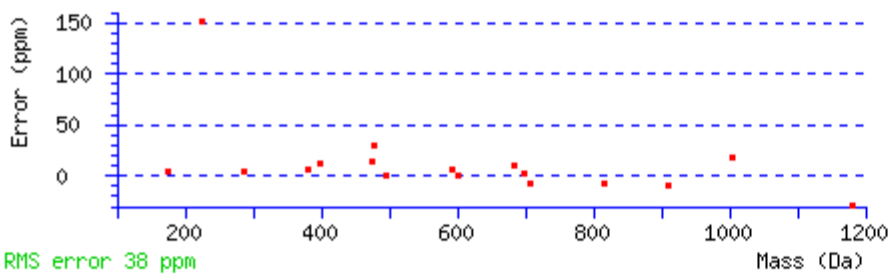

### NCBI BLAST search of QNRPIPQWIR

(Parameters: blastp, nr protein database, expect=20000, no filter, PAM30)

Other BLAST [web gateways](#)

### All matches to this query

| Score | Mr(calc):   | Delta    | Sequence                    |
|-------|-------------|----------|-----------------------------|
| 51.9  | 1306.725815 | 0.000757 | <a href="#">QNRPIPQWIR</a>  |
| 0.9   | 1306.724487 | 0.002085 | <a href="#">TVSFESKIQLR</a> |

# MASCOT Search Results

## Peptide View

MS/MS Fragmentation of **LLLAPSSK**

Found in **MOV10\_HUMAN**, Putative helicase MOV-10 OS=Homo sapiens GN=MOV10 PE=1 SV=2

Match to Query 2187: 827.512428 from(414.763490,2+) rtinseconds(1996) index(18369)

Title: Locus:1.1.1.2346.4

Data file 2011-11-12 - TFD - EP 5-5.mgf

Click mouse within plot area to zoom in by factor of two about that point

Or, Plot from  to  Da

Label all possible matches  Label matches used for scoring

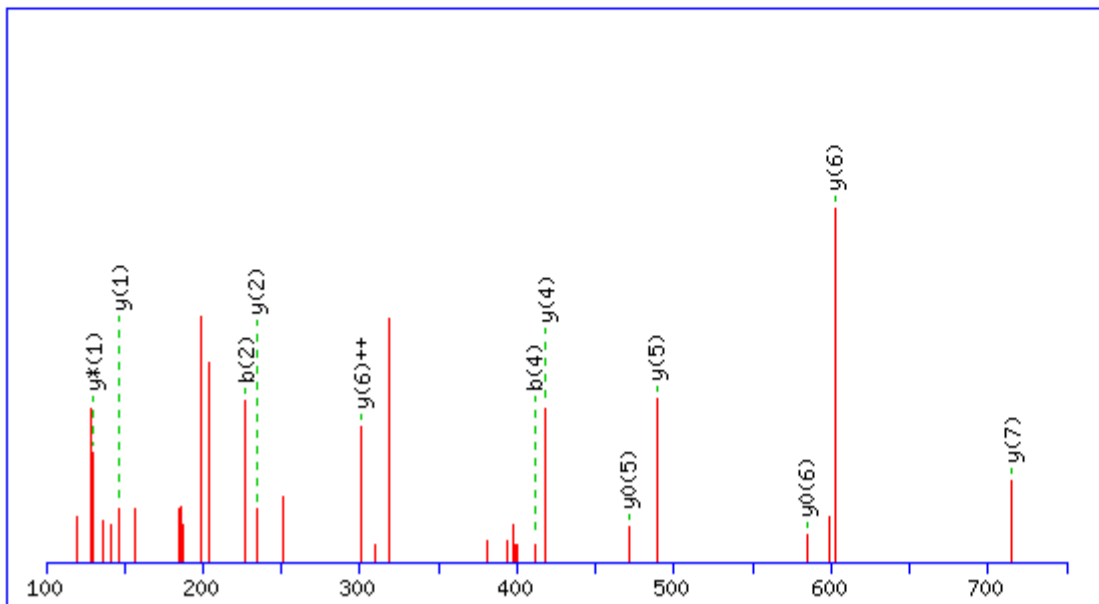

Monoisotopic mass of neutral peptide Mr(calc): 827.511627

Fixed modifications: Propionamide (C) (apply to specified residues or termini only)

Ions Score: 37 Expect: 0.0007

Matches : 12/58 fragment ions using 24 most intense peaks [\(help\)](#)

| # | b                 | b <sup>++</sup> | b <sup>0</sup> | b <sup>0++</sup> | Seq. | y                 | y <sup>++</sup>   | y <sup>*</sup>    | y <sup>*++</sup> | y <sup>0</sup>    | y <sup>0++</sup> | # |
|---|-------------------|-----------------|----------------|------------------|------|-------------------|-------------------|-------------------|------------------|-------------------|------------------|---|
| 1 | 114.091340        | 57.549308       |                |                  | L    |                   |                   |                   |                  |                   |                  | 8 |
| 2 | <b>227.175404</b> | 114.091340      |                |                  | L    | <b>715.434866</b> | 358.221071        | 698.408317        | 349.707797       | 697.424301        | 349.215789       | 7 |
| 3 | 340.259468        | 170.633372      |                |                  | L    | <b>602.350802</b> | <b>301.679039</b> | 585.324253        | 293.165765       | <b>584.340237</b> | 292.673757       | 6 |
| 4 | <b>411.296582</b> | 206.151929      |                |                  | A    | <b>489.266738</b> | 245.137007        | 472.240189        | 236.623732       | <b>471.256173</b> | 236.131724       | 5 |
| 5 | 508.349346        | 254.678311      |                |                  | P    | <b>418.229624</b> | 209.618450        | 401.203075        | 201.105175       | 400.219059        | 200.613167       | 4 |
| 6 | 595.381374        | 298.194325      | 577.370809     | 289.189043       | S    | 321.176860        | 161.092068        | 304.150311        | 152.578793       | 303.166295        | 152.086785       | 3 |
| 7 | 682.413402        | 341.710339      | 664.402837     | 332.705057       | S    | <b>234.144832</b> | 117.576054        | 217.118283        | 109.062779       | 216.134267        | 108.570771       | 2 |
| 8 |                   |                 |                |                  | K    | <b>147.112804</b> | 74.060040         | <b>130.086255</b> | 65.546765        |                   |                  | 1 |

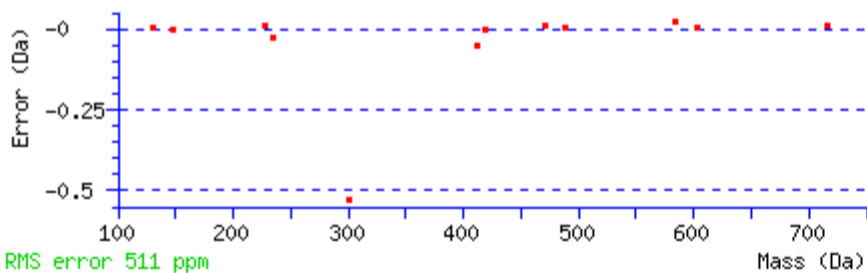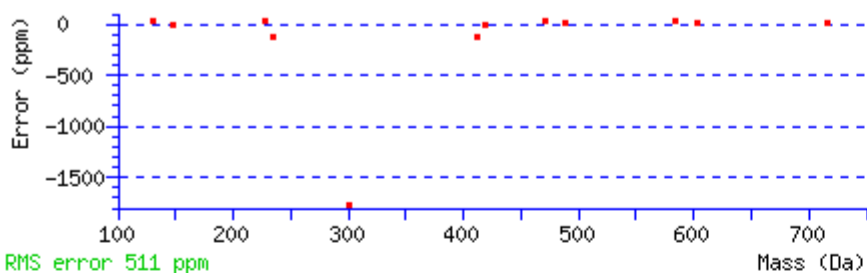

NCBI BLAST search of [LLLAPSSK](#)

(Parameters: blastp, nr protein database, expect=20000, no filter, PAM30)

Other BLAST [web gateways](#)

## All matches to this query

| Score | Mr(calc):  | Delta    | Sequence                 |
|-------|------------|----------|--------------------------|
| 36.9  | 827.511627 | 0.000801 | <a href="#">LLLAPSSK</a> |
| 14.0  | 827.511627 | 0.000801 | <a href="#">LLLNDK</a>   |
| 10.7  | 827.511627 | 0.000801 | <a href="#">LLPLASSK</a> |
| 7.1   | 827.511642 | 0.000786 | <a href="#">PIVDKLK</a>  |
| 6.9   | 827.511627 | 0.000801 | <a href="#">EPTKLLK</a>  |
| 5.9   | 827.511627 | 0.000801 | <a href="#">IIPITKEK</a> |
| 5.9   | 827.511642 | 0.000786 | <a href="#">ILDLVQK</a>  |
| 5.3   | 827.511642 | 0.000786 | <a href="#">LLVKDPK</a>  |
| 4.7   | 827.511642 | 0.000786 | <a href="#">IPQILTK</a>  |
| 4.4   | 827.511627 | 0.000801 | <a href="#">IENLVK</a>   |

# **MASCOT** Mascot Search Results

## Peptide View

MS/MS Fragmentation of **IFNKVEK**

Found in **NSUN6\_HUMAN**, Putative methyltransferase NSUN6 OS=Homo sapiens GN=NSUN6 PE=1 SV=1

Match to Query 7422: 876.513628 from(439.264090,2+) rtinseconds(2486) index(30191)

Title: Locus:1.1.1.2166.7

Data file 2011-11-12 - TFD - EP 5-6.mgf

Click mouse within plot area to zoom in by factor of two about that point

Or, Plot from  to  Da

Label all possible matches  Label matches used for scoring

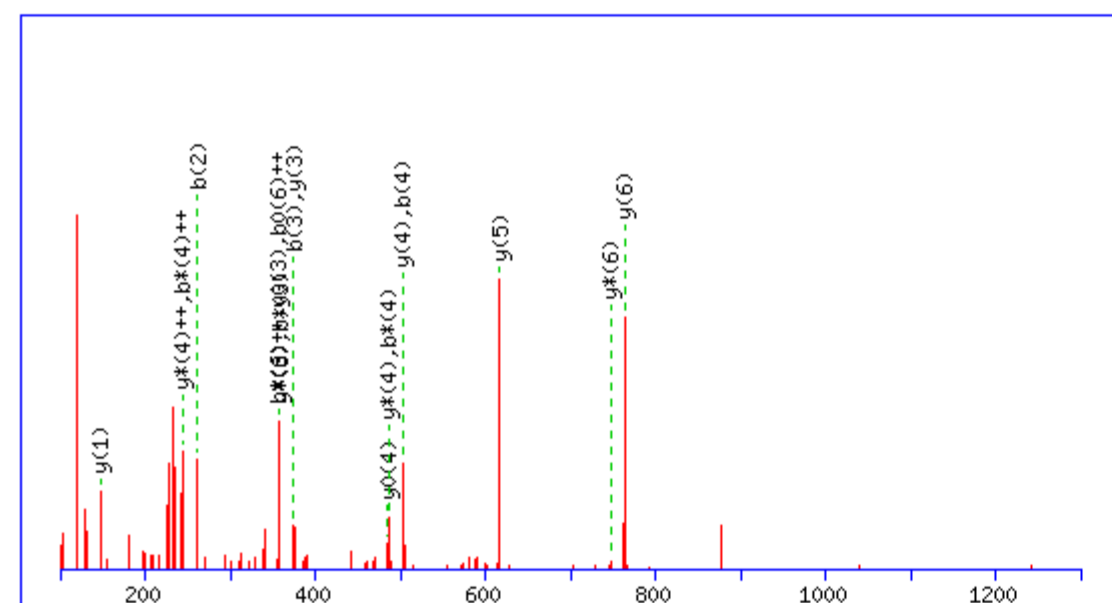

Monoisotopic mass of neutral peptide Mr(calc): 876.506882

Fixed modifications: Propionamide (C) (apply to specified residues or termini only)

Ions Score: 31 Expect: 0.0048

Matches : 19/56 fragment ions using 21 most intense peaks [\(help\)](#)

| # | b          | b <sup>++</sup> | b <sup>*</sup> | b <sup>*++</sup> | b <sup>0</sup> | b <sup>0++</sup> | Seq. | y          | y <sup>++</sup> | y <sup>*</sup> | y <sup>*++</sup> | y <sup>0</sup> | y <sup>0++</sup> | # |
|---|------------|-----------------|----------------|------------------|----------------|------------------|------|------------|-----------------|----------------|------------------|----------------|------------------|---|
| 1 | 114.091340 | 57.549308       |                |                  |                |                  | I    |            |                 |                |                  |                |                  | 7 |
| 2 | 261.159754 | 131.083515      |                |                  |                |                  | F    | 764.430115 | 382.718696      | 747.403566     | 374.205421       | 746.419550     | 373.713413       | 6 |
| 3 | 375.202681 | 188.104978      | 358.176132     | 179.591704       |                |                  | N    | 617.361701 | 309.184489      | 600.335152     | 300.671214       | 599.351136     | 300.179206       | 5 |
| 4 | 503.297644 | 252.152460      | 486.271095     | 243.639186       |                |                  | K    | 503.318774 | 252.163025      | 486.292225     | 243.649751       | 485.308209     | 243.157743       | 4 |
| 5 | 602.366058 | 301.686667      | 585.339509     | 293.173393       |                |                  | V    | 375.223811 | 188.115544      | 358.197262     | 179.602269       | 357.213246     | 179.110261       | 3 |
| 6 | 731.408651 | 366.207964      | 714.382102     | 357.694689       | 713.398086     | 357.202681       | E    | 276.155397 | 138.581336      | 259.128848     | 130.068062       | 258.144832     | 129.576054       | 2 |
| 7 |            |                 |                |                  |                |                  | K    | 147.112804 | 74.060040       | 130.086255     | 65.546765        |                |                  | 1 |

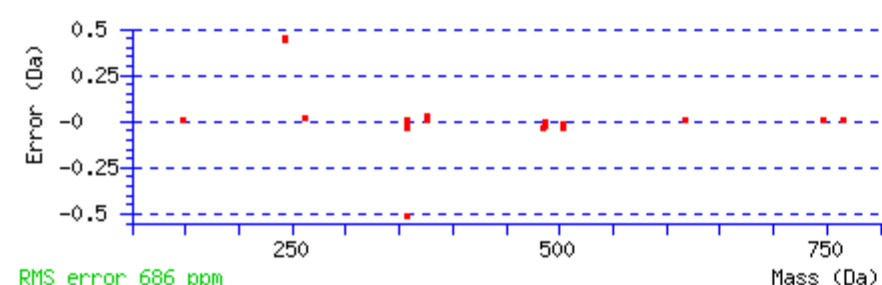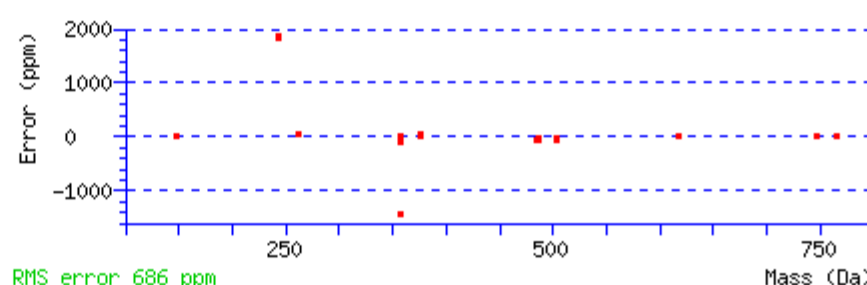

NCBI BLAST search of **IFNKVEK**

(Parameters: blastp, nr protein database, expect=20000, no filter, PAM30)

Other BLAST [web gateways](#)

All matches to this query

| Score | Mr(calc):  | Delta    | Sequence                 |
|-------|------------|----------|--------------------------|
| 30.7  | 876.506882 | 0.006746 | <a href="#">IFNKVEK</a>  |
| 16.2  | 876.506882 | 0.006746 | <a href="#">LFILESR</a>  |
| 15.6  | 876.506882 | 0.006746 | <a href="#">LVYQLNK</a>  |
| 13.8  | 876.506882 | 0.006746 | <a href="#">LDFKNIK</a>  |
| 9.4   | 876.506882 | 0.006746 | <a href="#">NLFLKDK</a>  |
| 9.1   | 876.506882 | 0.006746 | <a href="#">VEFKLNK</a>  |
| 8.3   | 876.510239 | 0.003389 | <a href="#">LLSKMASK</a> |
| 4.9   | 876.506882 | 0.006746 | <a href="#">YPLLISR</a>  |
| 3.6   | 876.506882 | 0.006746 | <a href="#">KFINDIK</a>  |
| 3.4   | 876.506882 | 0.006746 | <a href="#">LFSKPASK</a> |

# MASCOT Search Results

## Peptide View

MS/MS Fragmentation of **QDGGTAPVASASPK**

Found in **RBM15\_HUMAN**, Putative RNA-binding protein 15 OS=Homo sapiens GN=RBM15 PE=1 SV=2

Match to Query 623486: 1284.634988 from(643.324770,2+) rtinseconds(1010) index(158460)

Title: Locus:1.1.1.1069.11

Data file C:\Program Files (x86)\Matrix Science\Mascot Daemon\mgf3 TFD - Epitel - R2\mascot\_daemon\_merge.mgf

Click mouse within plot area to zoom in by factor of two about that point

Or, Plot from  to  Da

Label all possible matches  Label matches used for scoring

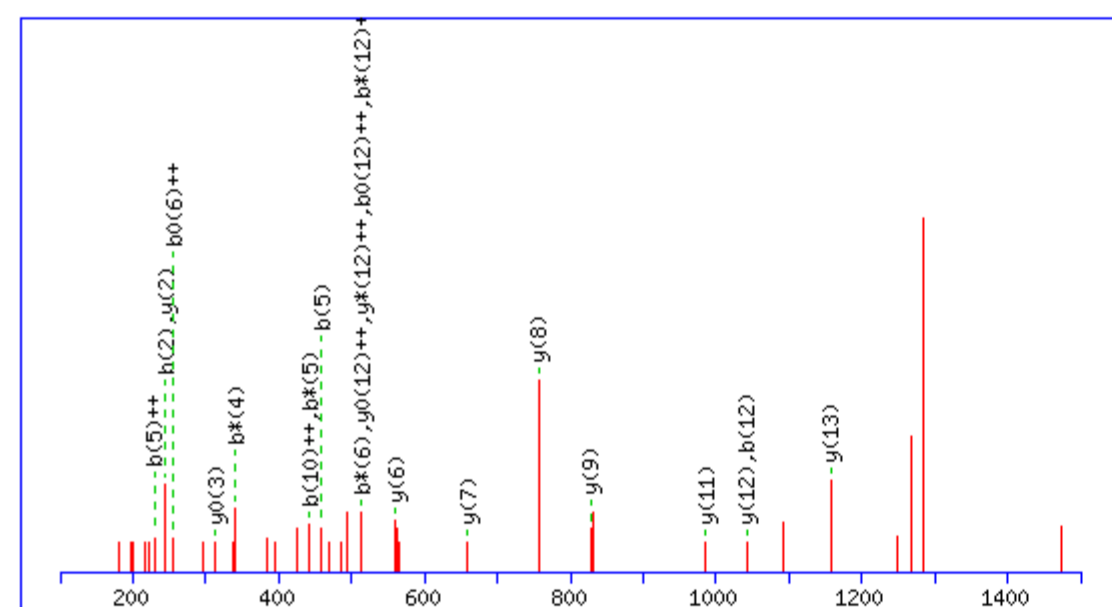

Monoisotopic mass of neutral peptide Mr(calc): 1284.630997

Fixed modifications: Carbamidomethyl (C) (apply to specified residues or termini only)

Ions Score: 63 Expect: 3.8e-006

Matches : 22/150 fragment ions using 23 most intense peaks [\(help\)](#)

| #  | b                  | b <sup>++</sup>   | b <sup>*</sup>    | b <sup>*++</sup>  | b <sup>0</sup> | b <sup>0++</sup>  | Seq. | y                  | y <sup>++</sup> | y <sup>*</sup> | y <sup>*++</sup>  | y <sup>0</sup>    | y <sup>0++</sup>  | #  |
|----|--------------------|-------------------|-------------------|-------------------|----------------|-------------------|------|--------------------|-----------------|----------------|-------------------|-------------------|-------------------|----|
| 1  | 129.065854         | 65.036565         | 112.039305        | 56.523291         |                |                   | Q    |                    |                 |                |                   |                   |                   | 14 |
| 2  | <b>244.092797</b>  | 122.550037        | 227.066248        | 114.036762        | 226.082232     | 113.544754        | D    | <b>1157.579694</b> | 579.293485      | 1140.553145    | 570.780211        | 1139.569129       | 570.288203        | 13 |
| 3  | 301.114261         | 151.060768        | 284.087712        | 142.547494        | 283.103696     | 142.055486        | G    | <b>1042.552751</b> | 521.780014      | 1025.526202    | <b>513.266739</b> | 1024.542186       | <b>512.774731</b> | 12 |
| 4  | 358.135725         | 179.571500        | <b>341.109176</b> | 171.058226        | 340.125160     | 170.566218        | G    | <b>985.531287</b>  | 493.269282      | 968.504738     | 484.756007        | 967.520722        | 484.263999        | 11 |
| 5  | <b>459.183404</b>  | <b>230.095340</b> | <b>442.156855</b> | 221.582066        | 441.172839     | 221.090058        | T    | 928.509823         | 464.758550      | 911.483274     | 456.245275        | 910.499258        | 455.753267        | 10 |
| 6  | 530.220518         | 265.613897        | <b>513.193969</b> | 257.100623        | 512.209953     | <b>256.608615</b> | A    | <b>827.462144</b>  | 414.234710      | 810.435595     | 405.721436        | 809.451579        | 405.229428        | 9  |
| 7  | 627.273282         | 314.140279        | 610.246733        | 305.627005        | 609.262717     | 305.134997        | P    | <b>756.425030</b>  | 378.716153      | 739.398481     | 370.202879        | 738.414465        | 369.710871        | 8  |
| 8  | 726.341696         | 363.674486        | 709.315147        | 355.161212        | 708.331131     | 354.669204        | V    | <b>659.372266</b>  | 330.189771      | 642.345717     | 321.676497        | 641.361701        | 321.184489        | 7  |
| 9  | 797.378810         | 399.193043        | 780.352261        | 390.679769        | 779.368245     | 390.187761        | A    | <b>560.303852</b>  | 280.655564      | 543.277303     | 272.142290        | 542.293287        | 271.650282        | 6  |
| 10 | 884.410838         | <b>442.709057</b> | 867.384289        | 434.195783        | 866.400273     | 433.703775        | S    | 489.266738         | 245.137007      | 472.240189     | 236.623733        | 471.256173        | 236.131725        | 5  |
| 11 | 955.447952         | 478.227614        | 938.421403        | 469.714339        | 937.437387     | 469.222332        | A    | 402.234710         | 201.620993      | 385.208161     | 193.107719        | 384.224145        | 192.615711        | 4  |
| 12 | <b>1042.479980</b> | 521.743628        | 1025.453431       | <b>513.230354</b> | 1024.469415    | <b>512.738346</b> | S    | 331.197596         | 166.102436      | 314.171047     | 157.589162        | <b>313.187031</b> | 157.097154        | 3  |
| 13 | 1139.532744        | 570.270010        | 1122.506195       | 561.756736        | 1121.522179    | 561.264728        | P    | <b>244.165568</b>  | 122.586422      | 227.139019     | 114.073148        |                   |                   | 2  |
| 14 |                    |                   |                   |                   |                |                   | K    | 147.112804         | 74.060040       | 130.086255     | 65.546765         |                   |                   | 1  |

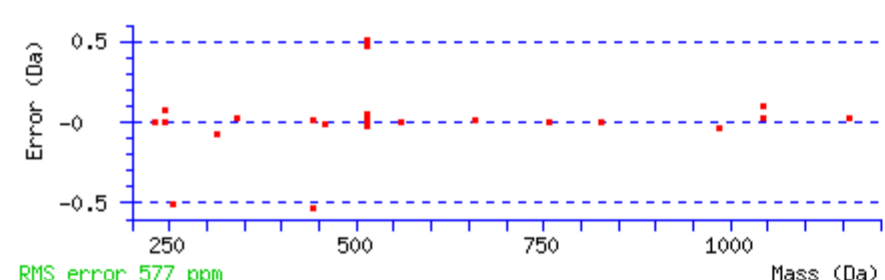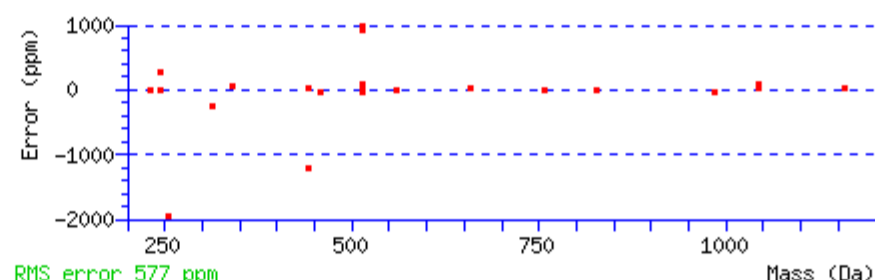

NCBI BLAST search of **QDGGTAPVASASPK**

(Parameters: blastp, nr protein database, expect=20000, no filter, PAM30)

Other BLAST [web gateways](#)

All matches to this query

| Score | Mr(calc):   | Delta     | Sequence                       |
|-------|-------------|-----------|--------------------------------|
| 62.6  | 1284.630997 | 0.003991  | <a href="#">QDGGTAPVASASPK</a> |
| 4.5   | 1284.642197 | -0.007209 | <a href="#">ENRNLDNVSPK</a>    |
| 3.0   | 1284.628494 | 0.006494  | <a href="#">FRGPAPPPNAVM</a>   |
| 3.0   | 1284.628494 | 0.006494  | <a href="#">FRGPAPPPNAVM</a>   |
| 2.8   | 1284.642212 | -0.007224 | <a href="#">QSPSRSSSPQPK</a>   |
| 1.7   | 1284.638397 | -0.003409 | <a href="#">GAVLTTTQYGKM</a>   |
| 0.7   | 1284.630997 | 0.003991  | <a href="#">QNSPVAPTAQPK</a>   |
| 0.6   | 1284.635696 | -0.000708 | <a href="#">SRAPACLGGGPR</a>   |
| 0.1   | 1284.635681 | -0.000693 | <a href="#">MERPPRAAGR</a>     |

Mascot: <http://www.matrixscience.com/>

# MASCOT Search Results

## Peptide View

MS/MS Fragmentation of **LDQPKLDEVTR**

Found in **RB15B\_HUMAN**, Putative RNA-binding protein 15B OS=Homo sapiens GN=RBM15B PE=1 SV=3

Match to Query 30836: 1328.692482 from(443.904770,3+) rtinseconds(2091) index(24525)

Title: Locus:1.1.1.2285.9

Data file 2011-11-10 - TFD - EP 4-3.mgf

Click mouse within plot area to zoom in by factor of two about that point

Or, Plot from  to  Da

Label all possible matches  Label matches used for scoring

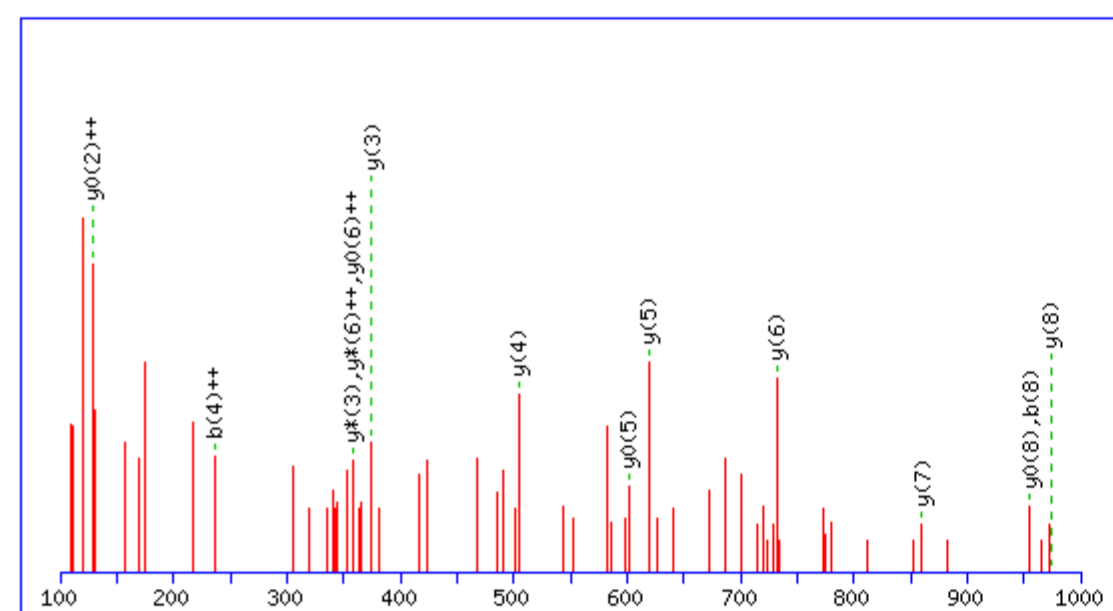

Monoisotopic mass of neutral peptide Mr(calc): 1328.693588

Fixed modifications: Propionamide (C) (apply to specified residues or termini only)

Variable modifications:

P4 : Oxidation (P)

Ions Score: 34 Expect: 0.0059

Matches : 14/112 fragment ions using 18 most intense peaks [\(help\)](#)

| #  | b                 | b <sup>++</sup>   | b <sup>+</sup> | b <sup>+++</sup> | b <sup>0</sup> | b <sup>0++</sup> | Seq. | y                 | y <sup>++</sup> | y <sup>+</sup>    | y <sup>+++</sup>  | y <sup>0</sup>    | y <sup>0++</sup>  | #  |
|----|-------------------|-------------------|----------------|------------------|----------------|------------------|------|-------------------|-----------------|-------------------|-------------------|-------------------|-------------------|----|
| 1  | 114.091340        | 57.549308         |                |                  |                |                  | L    |                   |                 |                   |                   |                   |                   | 11 |
| 2  | 229.118283        | 115.062779        |                |                  | 211.107718     | 106.057497       | D    | 1216.616808       | 608.812042      | 1199.590259       | 600.298768        | 1198.606243       | 599.806760        | 10 |
| 3  | 357.176861        | 179.092068        | 340.150312     | 170.578794       | 339.166296     | 170.086786       | Q    | 1101.589865       | 551.298571      | 1084.563316       | 542.785296        | 1083.579300       | 542.293288        | 9  |
| 4  | 470.224540        | <b>235.615908</b> | 453.197991     | 227.102634       | 452.213975     | 226.610626       | P    | <b>973.531287</b> | 487.269282      | 956.504738        | 478.756007        | <b>955.520722</b> | 478.263999        | 8  |
| 5  | 598.319503        | 299.663390        | 581.292954     | 291.150115       | 580.308938     | 290.658107       | K    | <b>860.483608</b> | 430.745442      | 843.457059        | 422.232168        | 842.473043        | 421.740160        | 7  |
| 6  | 711.403567        | 356.205422        | 694.377018     | 347.692147       | 693.393002     | 347.200139       | L    | <b>732.388645</b> | 366.697961      | 715.362096        | <b>358.184686</b> | 714.378080        | <b>357.692678</b> | 6  |
| 7  | 826.430510        | 413.718893        | 809.403961     | 405.205619       | 808.419945     | 404.713611       | D    | <b>619.304581</b> | 310.155929      | 602.278032        | 301.642654        | <b>601.294016</b> | 301.150646        | 5  |
| 8  | <b>955.473103</b> | 478.240190        | 938.446554     | 469.726915       | 937.462538     | 469.234907       | E    | <b>504.277638</b> | 252.642457      | 487.251089        | 244.129183        | 486.267073        | 243.637175        | 4  |
| 9  | 1054.541517       | 527.774397        | 1037.514968    | 519.261122       | 1036.530952    | 518.769114       | V    | <b>375.235045</b> | 188.121161      | <b>358.208496</b> | 179.607886        | 357.224480        | 179.115878        | 3  |
| 10 | 1155.589196       | 578.298236        | 1138.562647    | 569.784962       | 1137.578631    | 569.292954       | T    | 276.166631        | 138.586953      | 259.140082        | 130.073679        | 258.156066        | <b>129.581671</b> | 2  |
| 11 |                   |                   |                |                  |                |                  | R    | 175.118952        | 88.063114       | 158.092403        | 79.549839         |                   |                   | 1  |

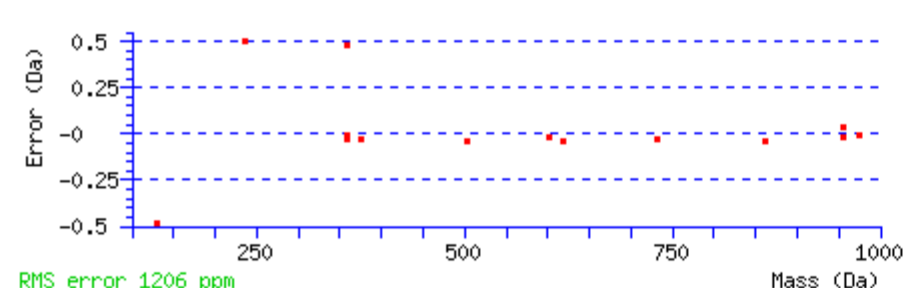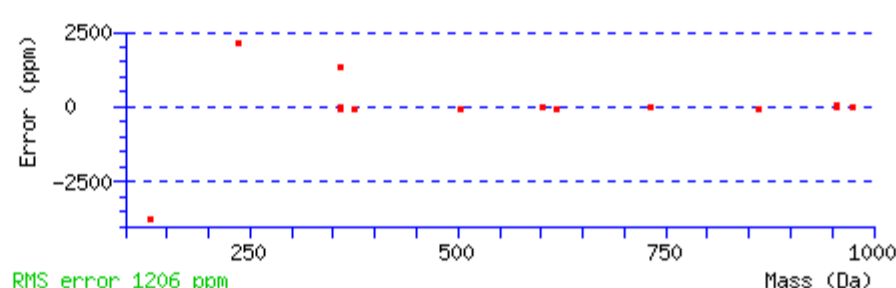

NCBI BLAST search of **LDQPKLDEVTR**

(Parameters: blastp, nr protein database, expect=20000, no filter, PAM30)

Other BLAST [web gateways](#)

## All matches to this query

| Score | Mr(calc):   | Delta     | Sequence                      |
|-------|-------------|-----------|-------------------------------|
| 34.0  | 1328.693588 | -0.001106 | <a href="#">LDQPKLDEVTR</a>   |
| 12.0  | 1328.691757 | 0.000725  | <a href="#">KLWGP GPPFFPS</a> |
| 5.5   | 1328.700958 | -0.008476 | <a href="#">EIPQNLMEVLK</a>   |
| 4.6   | 1328.700958 | -0.008476 | <a href="#">EIPQNLMEVLK</a>   |
| 3.1   | 1328.694427 | -0.001945 | <a href="#">KMNALHMLDIK</a>   |
| 1.9   | 1328.693558 | -0.001076 | <a href="#">QKAELQQEVEK</a>   |

# **MASCOT** Mascot Search Results

## Peptide View

MS/MS Fragmentation of **KNTTVP GK**

Found in **CB052\_HUMAN**, Putative uncharacterized protein LINC00471 OS=Homo sapiens GN=LINC00471 PE=5 SV=1

Match to Query 4874: 859.469608 from(430.742080,2+) rtinseconds(958) index(2249)

Title: Locus:1.1.1.1783.13

Data file 2011-11-12 - TFD - EP 5-4.mgf

Click mouse within plot area to zoom in by factor of two about that point

Or, Plot from  to  Da

Label all possible matches  Label matches used for scoring

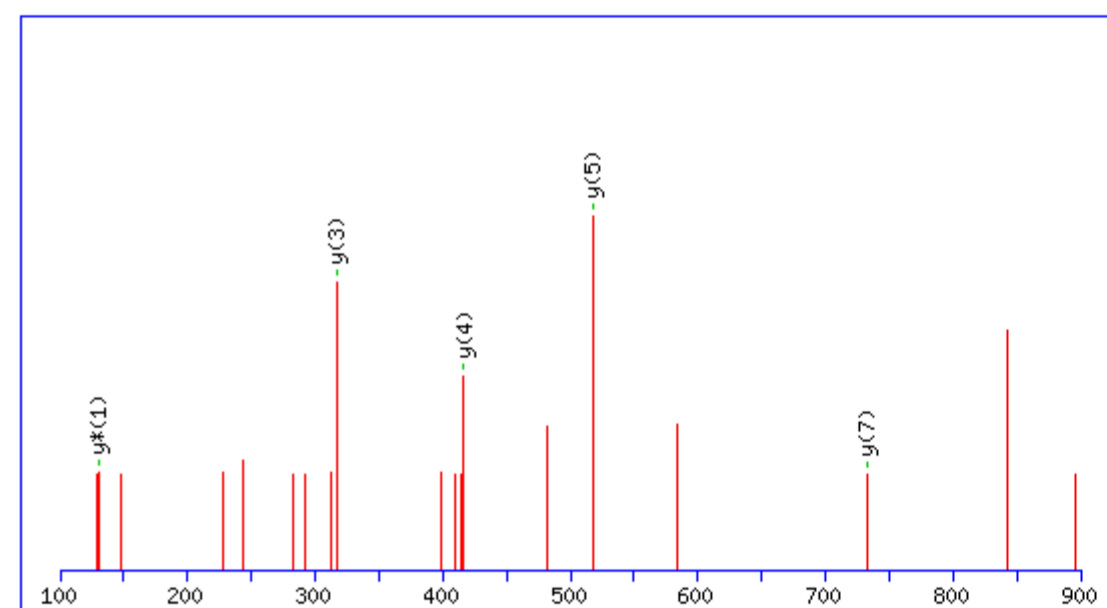

Monoisotopic mass of neutral peptide Mr(calc): 859.476334

Fixed modifications: Propionamide (C) (apply to specified residues or termini only)

Variable modifications:

P6 : Oxidation (P)

Ions Score: 35 Expect: 0.0056

Matches : 5/72 fragment ions using 7 most intense peaks [\(help\)](#)

| # | b          | b <sup>++</sup> | b <sup>*</sup> | b <sup>*++</sup> | b <sup>0</sup> | b <sup>0++</sup> | Seq.     | y                 | y <sup>++</sup> | y <sup>*</sup>    | y <sup>*++</sup> | y <sup>0</sup> | y <sup>0++</sup> | # |
|---|------------|-----------------|----------------|------------------|----------------|------------------|----------|-------------------|-----------------|-------------------|------------------|----------------|------------------|---|
| 1 | 129.102239 | 65.054757       | 112.075690     | 56.541483        |                |                  | <b>K</b> |                   |                 |                   |                  |                |                  | 8 |
| 2 | 243.145166 | 122.076221      | 226.118617     | 113.562947       |                |                  | <b>N</b> | <b>732.388646</b> | 366.697961      | 715.362097        | 358.184687       | 714.378081     | 357.692679       | 7 |
| 3 | 344.192845 | 172.600061      | 327.166296     | 164.086786       | 326.182280     | 163.594778       | <b>T</b> | 618.345719        | 309.676498      | 601.319170        | 301.163223       | 600.335154     | 300.671215       | 6 |
| 4 | 445.240524 | 223.123900      | 428.213975     | 214.610626       | 427.229959     | 214.118618       | <b>T</b> | <b>517.298040</b> | 259.152658      | 500.271491        | 250.639384       | 499.287475     | 250.147376       | 5 |
| 5 | 544.308938 | 272.658107      | 527.282389     | 264.144833       | 526.298373     | 263.652825       | <b>V</b> | <b>416.250361</b> | 208.628819      | 399.223812        | 200.115544       |                |                  | 4 |
| 6 | 657.356617 | 329.181947      | 640.330068     | 320.668672       | 639.346052     | 320.176664       | <b>P</b> | <b>317.181947</b> | 159.094612      | 300.155398        | 150.581337       |                |                  | 3 |
| 7 | 714.378081 | 357.692679      | 697.351532     | 349.179404       | 696.367516     | 348.687396       | <b>G</b> | 204.134268        | 102.570772      | 187.107719        | 94.057498        |                |                  | 2 |
| 8 |            |                 |                |                  |                |                  | <b>K</b> | 147.112804        | 74.060040       | <b>130.086255</b> | 65.546765        |                |                  | 1 |

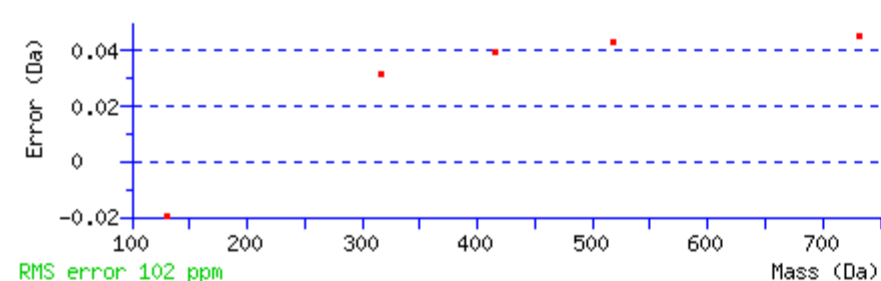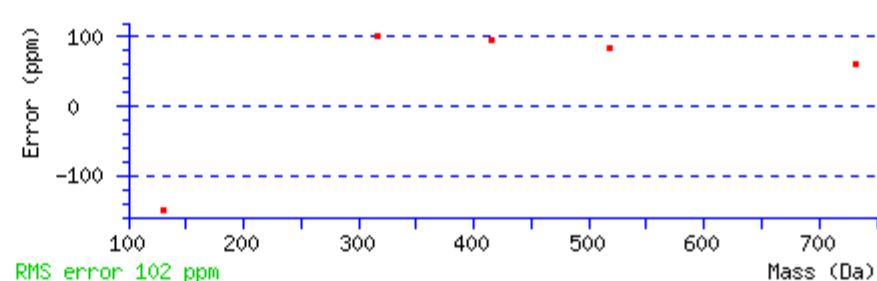

NCBI BLAST search of **KNTTVP GK**

(Parameters: blastp, nr protein database, expect=20000, no filter, PAM30)

Other BLAST [web gateways](#)

## All matches to this query

| Score | Mr(calc):  | Delta     | Sequence                  |
|-------|------------|-----------|---------------------------|
| 35.1  | 859.476334 | -0.006726 | <a href="#">KNTTVP GK</a> |
| 33.9  | 859.476334 | -0.006726 | <a href="#">QGSATVGLK</a> |
| 13.3  | 859.465073 | 0.004535  | <a href="#">KVEEDLK</a>   |
| 11.0  | 859.465073 | 0.004535  | <a href="#">ELTEKPK</a>   |
| 9.1   | 859.476303 | -0.006695 | <a href="#">QGSAKLEK</a>  |
| 9.1   | 859.476303 | -0.006695 | <a href="#">QQSELKK</a>   |
| 8.9   | 859.476318 | -0.006710 | <a href="#">KPATAAGTK</a> |
| 8.3   | 859.465073 | 0.004535  | <a href="#">KEVVEEK</a>   |
| 8.1   | 859.476334 | -0.006726 | <a href="#">TGGQLSLGK</a> |
| 7.4   | 859.465088 | 0.004520  | <a href="#">ELAVTSPK</a>  |

# MASCOT Search Results

## Peptide View

MS/MS Fragmentation of **VVSAAVQAQHSATK**

Found in **RBGPR\_HUMAN**, Rab3 GTPase-activating protein non-catalytic subunit OS=Homo sapiens GN=RAB3GAP2 PE=1 SV=1

Match to Query 742784: 1395.744582 from(466.255470,3+) rtinseconds(936) index(327594)

Title: Locus:1.1.1.688.14

Data file C:\Program Files (x86)\Matrix Science\Mascot Daemon\mgf3 TFD - Epitel - R2\mascot\_daemon\_merge.mgf

Click mouse within plot area to zoom in by factor of two about that point

Or, Plot from  to  Da

Label all possible matches  Label matches used for scoring

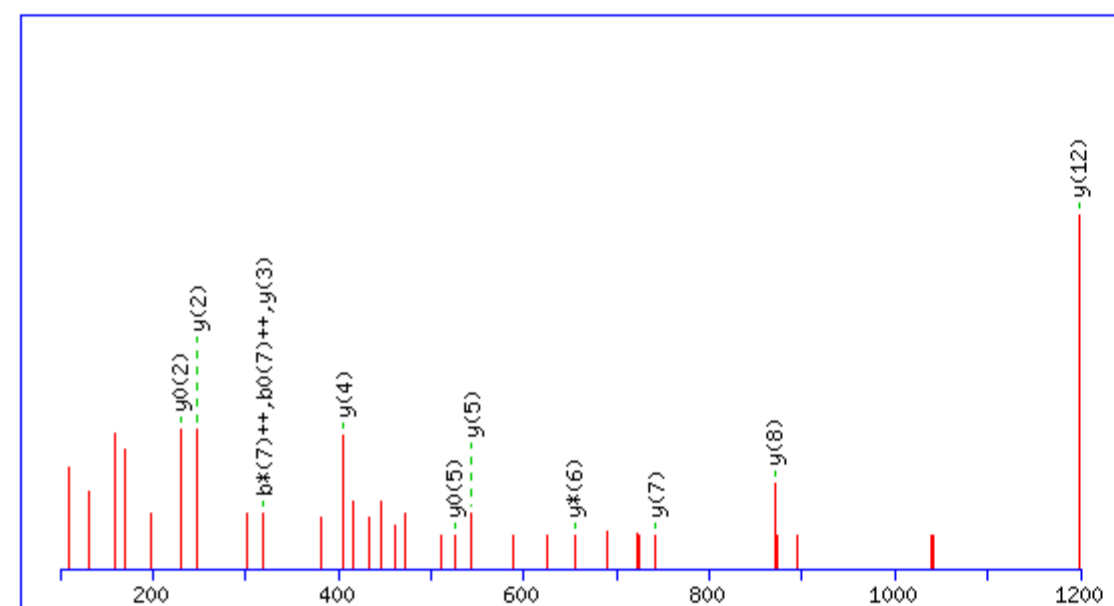

Monoisotopic mass of neutral peptide Mr(calc): 1395.747025

Fixed modifications: Carbamidomethyl (C) (apply to specified residues or termini only)

Ions Score: 45 Expect: 0.00025

Matches : 12/138 fragment ions using 19 most intense peaks [\(help\)](#)

| #  | b           | b <sup>++</sup> | b <sup>*</sup> | b <sup>*++</sup>  | b <sup>0</sup> | b <sup>0++</sup>  | Seq. | y                  | y <sup>++</sup> | y <sup>*</sup>    | y <sup>*++</sup> | y <sup>0</sup>    | y <sup>0++</sup> | #  |
|----|-------------|-----------------|----------------|-------------------|----------------|-------------------|------|--------------------|-----------------|-------------------|------------------|-------------------|------------------|----|
| 1  | 100.075690  | 50.541483       |                |                   |                |                   | V    |                    |                 |                   |                  |                   |                  | 14 |
| 2  | 199.144104  | 100.075690      |                |                   |                |                   | V    | 1297.685891        | 649.346583      | 1280.659342       | 640.833309       | 1279.675326       | 640.341301       | 13 |
| 3  | 286.176132  | 143.591704      |                |                   | 268.165567     | 134.586422        | S    | <b>1198.617477</b> | 599.812377      | 1181.590928       | 591.299102       | 1180.606912       | 590.807094       | 12 |
| 4  | 357.213246  | 179.110261      |                |                   | 339.202681     | 170.104978        | A    | 1111.585449        | 556.296362      | 1094.558900       | 547.783088       | 1093.574884       | 547.291080       | 11 |
| 5  | 428.250360  | 214.628818      |                |                   | 410.239795     | 205.623535        | A    | 1040.548335        | 520.777806      | 1023.521786       | 512.264531       | 1022.537770       | 511.772523       | 10 |
| 6  | 527.318774  | 264.163025      |                |                   | 509.308209     | 255.157742        | V    | 969.511221         | 485.259249      | 952.484672        | 476.745974       | 951.500656        | 476.253966       | 9  |
| 7  | 655.377352  | 328.192314      | 638.350803     | <b>319.679039</b> | 637.366787     | <b>319.187031</b> | Q    | <b>870.442807</b>  | 435.725042      | 853.416258        | 427.211767       | 852.432242        | 426.719759       | 8  |
| 8  | 726.414466  | 363.710871      | 709.387917     | 355.197596        | 708.403901     | 354.705588        | A    | <b>742.384229</b>  | 371.695753      | 725.357680        | 363.182478       | 724.373664        | 362.690470       | 7  |
| 9  | 854.473044  | 427.740160      | 837.446495     | 419.226885        | 836.462479     | 418.734877        | Q    | 671.347115         | 336.177196      | <b>654.320566</b> | 327.663921       | 653.336550        | 327.171913       | 6  |
| 10 | 991.531956  | 496.269616      | 974.505407     | 487.756341        | 973.521391     | 487.264333        | H    | <b>543.288537</b>  | 272.147907      | 526.261988        | 263.634632       | <b>525.277972</b> | 263.142624       | 5  |
| 11 | 1078.563984 | 539.785630      | 1061.537435    | 531.272356        | 1060.553419    | 530.780347        | S    | <b>406.229625</b>  | 203.618450      | 389.203076        | 195.105176       | 388.219060        | 194.613168       | 4  |
| 12 | 1149.601098 | 575.304187      | 1132.574549    | 566.790912        | 1131.590533    | 566.298904        | A    | <b>319.197597</b>  | 160.102436      | 302.171048        | 151.589162       | 301.187032        | 151.097154       | 3  |
| 13 | 1250.648777 | 625.828026      | 1233.622228    | 617.314752        | 1232.638212    | 616.822744        | T    | <b>248.160483</b>  | 124.583879      | 231.133934        | 116.070605       | <b>230.149918</b> | 115.578597       | 2  |
| 14 |             |                 |                |                   |                |                   | K    | 147.112804         | 74.060040       | 130.086255        | 65.546765        |                   |                  | 1  |

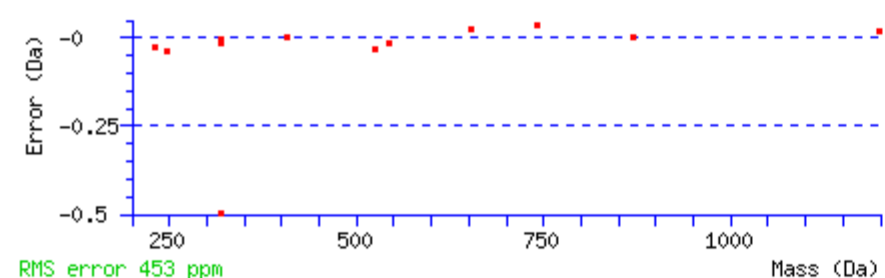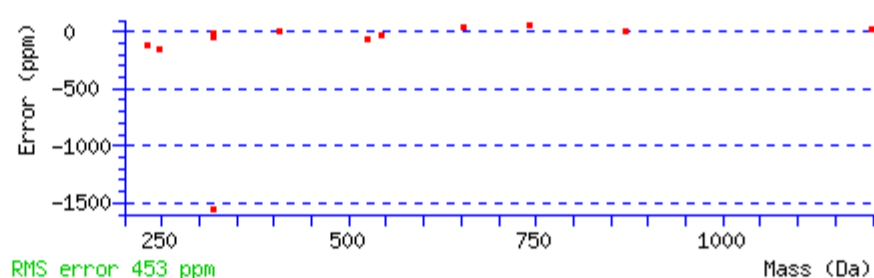

NCBI BLAST search of [VVSAAVQAQHSATK](#)

(Parameters: blastp, nr protein database, expect=20000, no filter, PAM30)

Other BLAST [web gateways](#)

All matches to this query

| Score | Mr(calc):   | Delta     | Sequence                       |
|-------|-------------|-----------|--------------------------------|
| 44.5  | 1395.747025 | -0.002443 | <a href="#">VVSAAVQAQHSATK</a> |
| 6.0   | 1395.750595 | -0.006013 | <a href="#">IFMLLVVGITSGM</a>  |
| 4.7   | 1395.735794 | 0.008788  | <a href="#">DLPPVKDPGALSR</a>  |

Mascot: <http://www.matrixscience.com/>

# MASCOT SCIENCE Mascot Search Results

## Peptide View

MS/MS Fragmentation of **VLVLGDSGVGK**

Found in **RABL3\_HUMAN**, Rab-like protein 3 OS=Homo sapiens GN=RABL3 PE=1 SV=1

Match to Query 18289: 1042.603548 from(522.309050,2+) rtinseconds(1989) index(20262)

Title: Locus:1.1.1.2176.25

Data file 2011-11-13 - TFD - EP 7-5.mgf

Click mouse within plot area to zoom in by factor of two about that point

Or, Plot from  to  Da

Label all possible matches  Label matches used for scoring

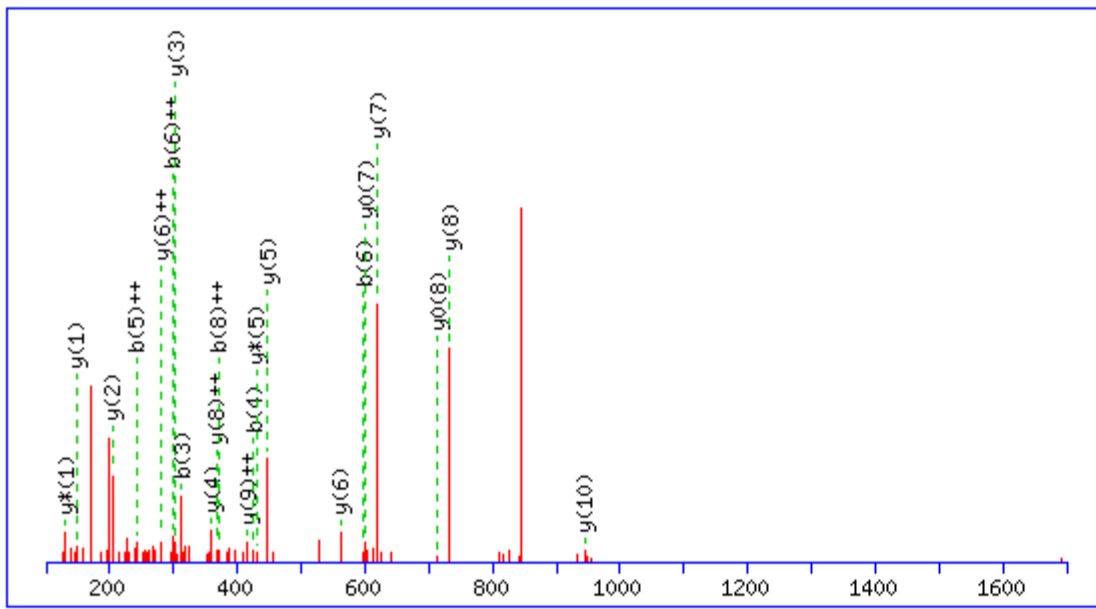

Monoisotopic mass of neutral peptide Mr(calc): 1042.602280

Fixed modifications: Propionamide (C) (apply to specified residues or termini only)

Ions Score: 57 Expect: 1.9e-005

Matches : 22/82 fragment ions using 44 most intense peaks [\(help\)](#)

| #  | b          | b <sup>++</sup> | b <sup>0</sup> | b <sup>0++</sup> | Seq. | y          | y <sup>++</sup> | y <sup>*</sup> | y <sup>*++</sup> | y <sup>0</sup> | y <sup>0++</sup> | #  |
|----|------------|-----------------|----------------|------------------|------|------------|-----------------|----------------|------------------|----------------|------------------|----|
| 1  | 100.075690 | 50.541483       |                |                  | V    |            |                 |                |                  |                |                  | 11 |
| 2  | 213.159754 | 107.083515      |                |                  | L    | 944.541123 | 472.774200      | 927.514574     | 464.260925       | 926.530558     | 463.768917       | 10 |
| 3  | 312.228168 | 156.617722      |                |                  | V    | 831.457059 | 416.232168      | 814.430510     | 407.718893       | 813.446494     | 407.226885       | 9  |
| 4  | 425.312232 | 213.159754      |                |                  | L    | 732.388645 | 366.697961      | 715.362096     | 358.184686       | 714.378080     | 357.692678       | 8  |
| 5  | 482.333696 | 241.670486      |                |                  | G    | 619.304581 | 310.155929      | 602.278032     | 301.642654       | 601.294016     | 301.150646       | 7  |
| 6  | 597.360639 | 299.183958      | 579.350074     | 290.178675       | D    | 562.283117 | 281.645197      | 545.256568     | 273.131922       | 544.272552     | 272.639914       | 6  |
| 7  | 684.392667 | 342.699972      | 666.382102     | 333.694689       | S    | 447.256174 | 224.131725      | 430.229625     | 215.618450       | 429.245609     | 215.126443       | 5  |
| 8  | 741.414131 | 371.210704      | 723.403566     | 362.205421       | G    | 360.224146 | 180.615711      | 343.197597     | 172.102437       |                |                  | 4  |
| 9  | 840.482545 | 420.744911      | 822.471980     | 411.739628       | V    | 303.202682 | 152.104979      | 286.176133     | 143.591704       |                |                  | 3  |
| 10 | 897.504009 | 449.255643      | 879.493444     | 440.250360       | G    | 204.134268 | 102.570772      | 187.107719     | 94.057498        |                |                  | 2  |
| 11 |            |                 |                |                  | K    | 147.112804 | 74.060040       | 130.086255     | 65.546765        |                |                  | 1  |

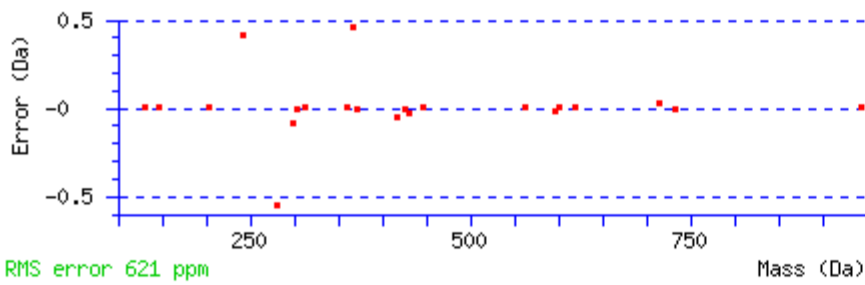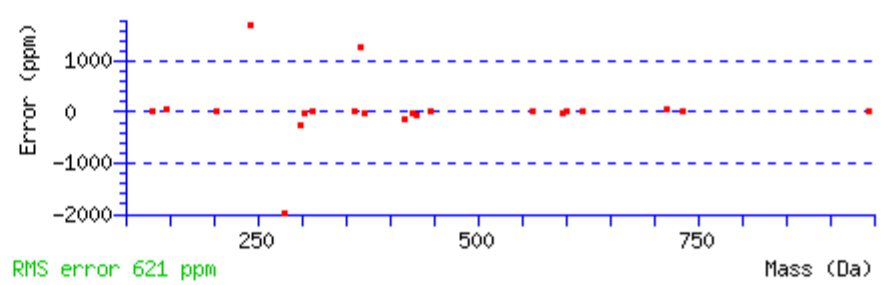

NCBI BLAST search of [VLVLGDSGVGK](#)

(Parameters: blastp, nr protein database, expect=20000, no filter, PAM30)

Other BLAST [web gateways](#)

## All matches to this query

| Score | Mr(calc):   | Delta     | Sequence                    |
|-------|-------------|-----------|-----------------------------|
| 71.3  | 1042.602280 | 0.001268  | <a href="#">VVLIGDSGVGK</a> |
| 57.4  | 1042.602280 | 0.001268  | <a href="#">VLVLGDSGVGK</a> |
| 4.8   | 1042.613495 | -0.009947 | <a href="#">KKPVSGGSVGK</a> |
| 3.6   | 1042.613495 | -0.009947 | <a href="#">VVTPGASRLK</a>  |
| 2.3   | 1042.595718 | 0.007830  | <a href="#">VAMTPALRGK</a>  |



# MASCOT Search Results

## Peptide View

MS/MS Fragmentation of **ETVGFGMLK**

Found in **LTOR2\_HUMAN**, Ragulator complex protein LAMTOR2 OS=Homo sapiens GN=LAMTOR2 PE=1 SV=1

Match to Query 15367: 996.497828 from(499.256190,2+) rtinseconds(2130) index(18864)

Title: Locus:1.1.1.2262.23

Data file 2011-11-13 - TFD - EP 7-7.mgf

Click mouse within plot area to zoom in by factor of two about that point

Or, Plot from  to  Da

Label all possible matches  Label matches used for scoring

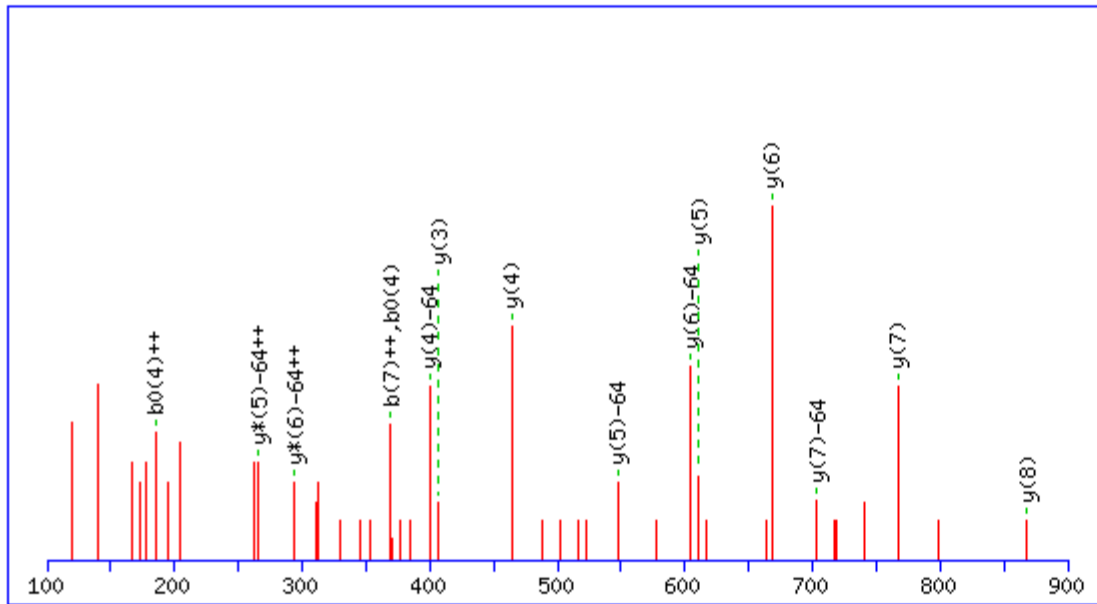

Monoisotopic mass of neutral peptide Mr(calc): 996.495026

Fixed modifications: Propionamide (C) (apply to specified residues or termini only)

Variable modifications:

M7 : Oxidation (M), with neutral losses 0.000000 (shown in table), 63.998285

Ions Score: 35 Expect: 0.0029

Matches : 15/100 fragment ions using 22 most intense peaks ([help](#))

| # | b          | b <sup>++</sup> | b <sup>0</sup> | b <sup>0++</sup> | Seq. | y          | y <sup>++</sup> | y <sup>*</sup> | y <sup>*++</sup> | y <sup>0</sup> | y <sup>0++</sup> | # |
|---|------------|-----------------|----------------|------------------|------|------------|-----------------|----------------|------------------|----------------|------------------|---|
| 1 | 130.049869 | 65.528572       | 112.039304     | 56.523290        | E    |            |                 |                |                  |                |                  | 9 |
| 2 | 231.097548 | 116.052412      | 213.086983     | 107.047130       | T    | 868.459703 | 434.733490      | 851.433154     | 426.220215       | 850.449138     | 425.728207       | 8 |
| 3 | 330.165962 | 165.586619      | 312.155397     | 156.581337       | V    | 767.412024 | 384.209650      | 750.385475     | 375.696376       |                |                  | 7 |
| 4 | 387.187426 | 194.097351      | 369.176861     | 185.092069       | G    | 668.343610 | 334.675443      | 651.317061     | 326.162169       |                |                  | 6 |
| 5 | 534.255840 | 267.631558      | 516.245275     | 258.626276       | F    | 611.322146 | 306.164711      | 594.295597     | 297.651437       |                |                  | 5 |
| 6 | 591.277304 | 296.142290      | 573.266739     | 287.137008       | G    | 464.253732 | 232.630504      | 447.227183     | 224.117230       |                |                  | 4 |
| 7 | 738.312704 | 369.659990      | 720.302139     | 360.654708       | M    | 407.232268 | 204.119772      | 390.205719     | 195.606497       |                |                  | 3 |
| 8 | 851.396768 | 426.202022      | 833.386203     | 417.196740       | L    | 260.196868 | 130.602072      | 243.170319     | 122.088798       |                |                  | 2 |
| 9 |            |                 |                |                  | K    | 147.112804 | 74.060040       | 130.086255     | 65.546765        |                |                  | 1 |

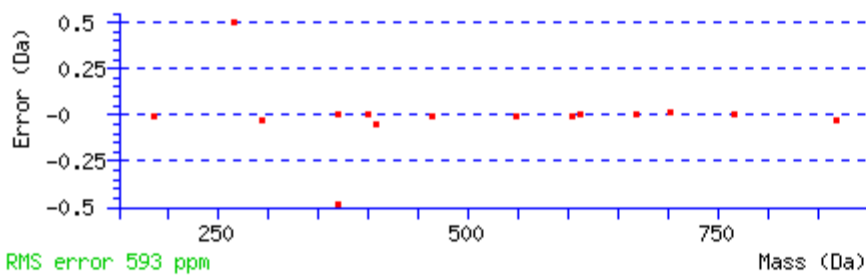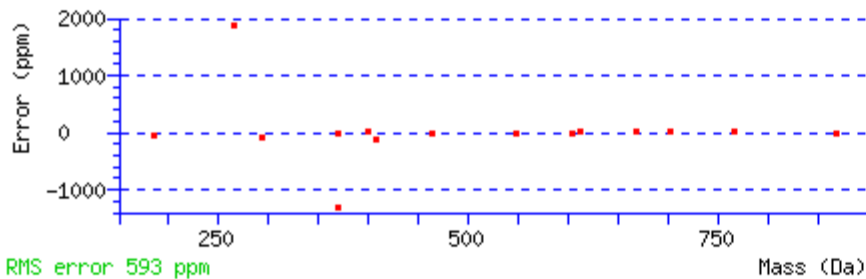

NCBI BLAST search of [ETVGFGMLK](#)

(Parameters: blastp, nr protein database, expect=20000, no filter, PAM30)

Other BLAST [web gateways](#)

All matches to this query

| Score | Mr(calc):  | Delta     | Sequence                  |
|-------|------------|-----------|---------------------------|
| 34.8  | 996.495026 | 0.002802  | <a href="#">ETVGFGMLK</a> |
| 7.9   | 996.502853 | -0.005025 | <a href="#">AKFENFNK</a>  |

# MASCOT SCIENCE Mascot Search Results

## Peptide View

MS/MS Fragmentation of **ELAPLFEELR**

Found in **LTOR3\_HUMAN**, Regulator complex protein LAMTOR3 OS=Homo sapiens GN=LAMTOR3 PE=1 SV=1

Match to Query 26879: 1215.649788 from(608.832170,2+) rtinseconds(3507) index(37948)

Title: Locus:1.1.1.2789.8

Data file 2011-11-13 - TFD - EP 7-7.mgf

Click mouse within plot area to zoom in by factor of two about that point

Or,   to  Da

Label all possible matches  Label matches used for scoring

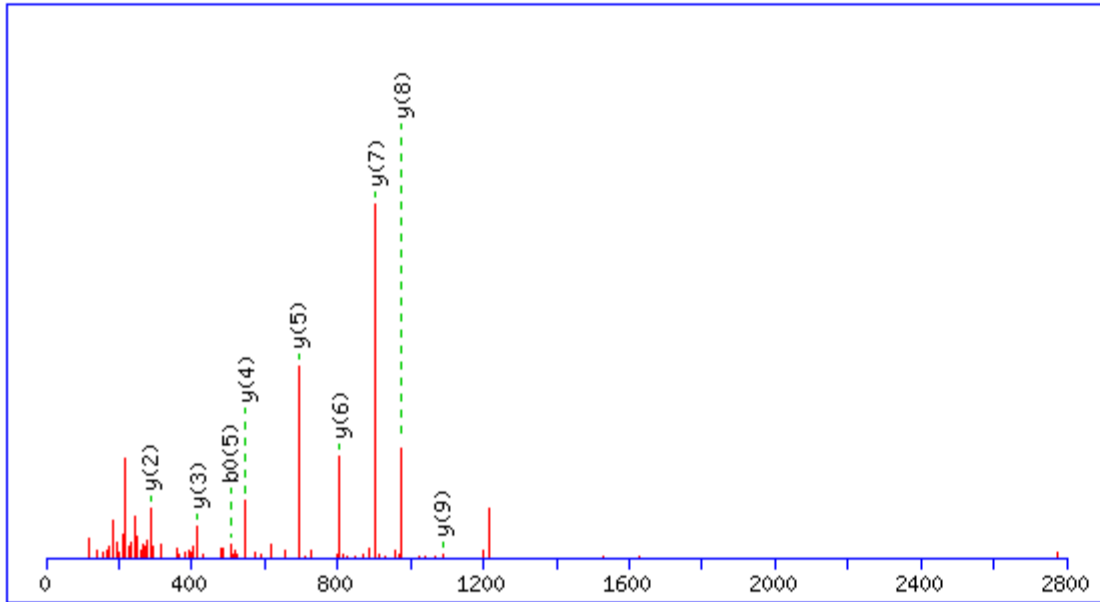

Monoisotopic mass of neutral peptide Mr(calc): 1215.649902

Fixed modifications: Propionamide (C) (apply to specified residues or termini only)

Ions Score: 79 Expect: 1.9e-007

Matches : 9/86 fragment ions using 11 most intense peaks [\(help\)](#)

| #  | b           | b <sup>++</sup> | b <sup>0</sup> | b <sup>0++</sup> | Seq. | y           | y <sup>++</sup> | y <sup>*</sup> | y <sup>*++</sup> | y <sup>0</sup> | y <sup>0++</sup> | #  |
|----|-------------|-----------------|----------------|------------------|------|-------------|-----------------|----------------|------------------|----------------|------------------|----|
| 1  | 130.049869  | 65.528572       | 112.039304     | 56.523290        | E    |             |                 |                |                  |                |                  | 10 |
| 2  | 243.133933  | 122.070605      | 225.123368     | 113.065322       | L    | 1087.614622 | 544.310949      | 1070.588073    | 535.797674       | 1069.604057    | 535.305666       | 9  |
| 3  | 314.171047  | 157.589161      | 296.160482     | 148.583879       | A    | 974.530558  | 487.768917      | 957.504009     | 479.255642       | 956.519993     | 478.763634       | 8  |
| 4  | 411.223811  | 206.115544      | 393.213246     | 197.110261       | P    | 903.493444  | 452.250360      | 886.466895     | 443.737085       | 885.482879     | 443.245077       | 7  |
| 5  | 524.307875  | 262.657576      | 506.297310     | 253.652293       | L    | 806.440680  | 403.723978      | 789.414131     | 395.210703       | 788.430115     | 394.718695       | 6  |
| 6  | 671.376289  | 336.191783      | 653.365724     | 327.186500       | F    | 693.356616  | 347.181946      | 676.330067     | 338.668671       | 675.346051     | 338.176663       | 5  |
| 7  | 800.418882  | 400.713079      | 782.408317     | 391.707797       | E    | 546.288202  | 273.647739      | 529.261653     | 265.134464       | 528.277637     | 264.642456       | 4  |
| 8  | 929.461475  | 465.234376      | 911.450910     | 456.229093       | E    | 417.245609  | 209.126442      | 400.219060     | 200.613168       | 399.235044     | 200.121160       | 3  |
| 9  | 1042.545539 | 521.776408      | 1024.534974    | 512.771125       | L    | 288.203016  | 144.605146      | 271.176467     | 136.091871       |                |                  | 2  |
| 10 |             |                 |                |                  | R    | 175.118952  | 88.063114       | 158.092403     | 79.549839        |                |                  | 1  |

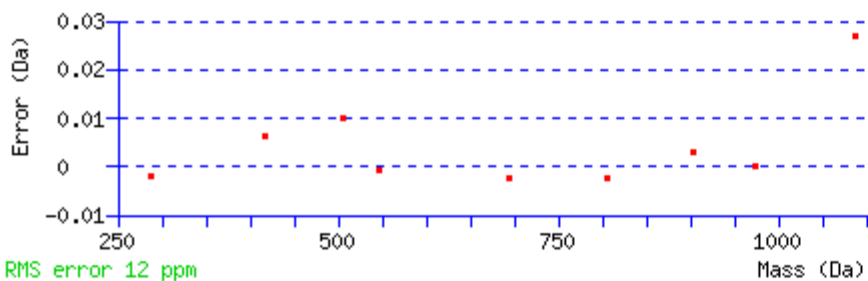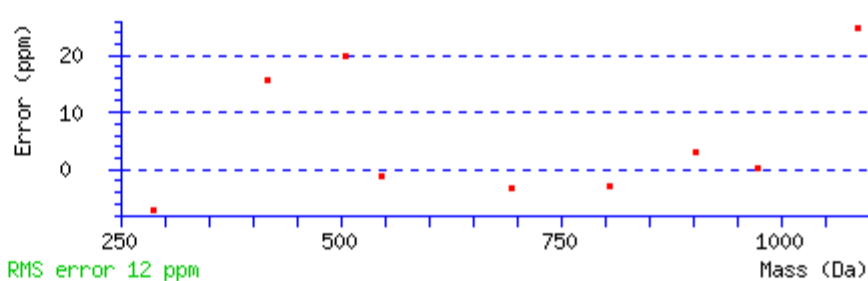

NCBI BLAST search of **ELAPLFEELR**

(Parameters: blastp, nr protein database, expect=20000, no filter, PAM30)

Other BLAST [web gateways](#)

## All matches to this query

| Score | Mr(calc):   | Delta     | Sequence                     |
|-------|-------------|-----------|------------------------------|
| 79.0  | 1215.649902 | -0.000114 | <a href="#">ELAPLFEELR</a>   |
| 12.7  | 1215.657120 | -0.007332 | <a href="#">ELSGSGLERLR</a>  |
| 6.7   | 1215.639374 | 0.010414  | <a href="#">LESSVCPVRR</a>   |
| 6.5   | 1215.661148 | -0.011360 | <a href="#">VPNASLEAFLR</a>  |
| 5.5   | 1215.657120 | -0.007332 | <a href="#">KNQETISQLR</a>   |
| 5.4   | 1215.647247 | 0.002541  | <a href="#">QAGGLSRFPGAR</a> |
| 0.8   | 1215.649918 | -0.000130 | <a href="#">ELPDPLLTYR</a>   |
| 0.1   | 1215.658478 | -0.008690 | <a href="#">HRQASPLVHR</a>   |
| 0.0   | 1215.645905 | 0.003883  | <a href="#">LTVSPEPSSKR</a>  |

# MASCOT Search Results

## Peptide View

MS/MS Fragmentation of **EVPVIFIHPLNTGLFR**

Found in **RLGPB\_HUMAN**, Ral GTPase-activating protein subunit beta OS=Homo sapiens GN=RALGAPB PE=1 SV=1

Match to Query 58437: 1851.034482 from(618.018770,3+) rtinseconds(3789) index(55485)

Title: Locus:1.1.1.2834.13

Data file 2011-11-14 - TFD - EP 8-1.mgf

Click mouse within plot area to zoom in by factor of two about that point

Or, Plot from  to  Da

Label all possible matches  Label matches used for scoring

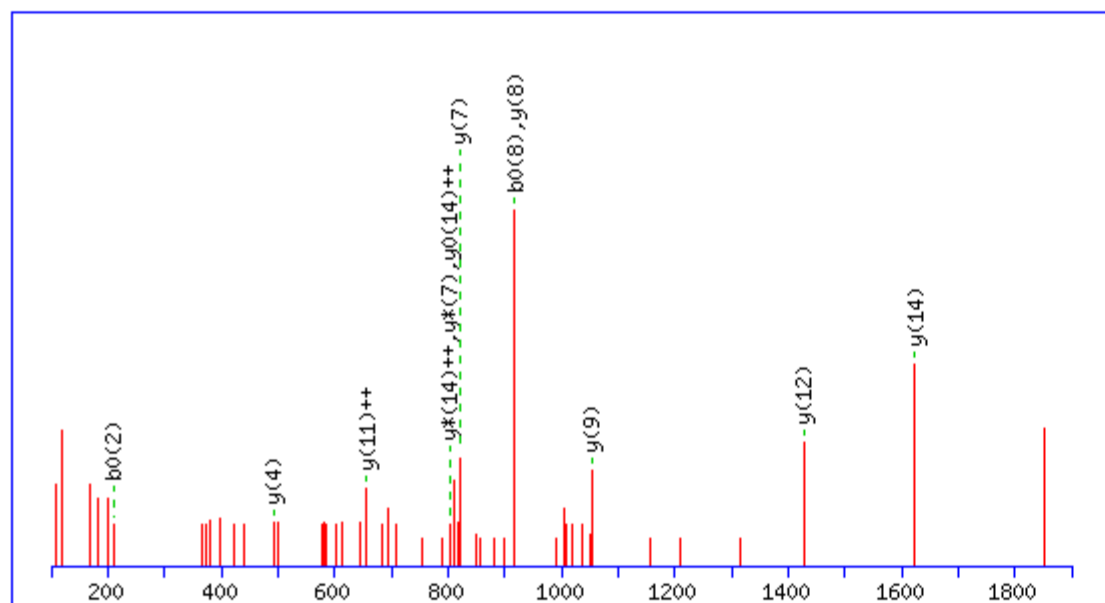

Monoisotopic mass of neutral peptide Mr(calc): 1851.040695

Fixed modifications: Propionamide (C) (apply to specified residues or termini only)

Ions Score: 31 Expect: 0.0022

Matches : 12/152 fragment ions using 14 most intense peaks ([help](#))

| #  | b           | b <sup>++</sup> | b <sup>*</sup> | b <sup>*++</sup> | b <sup>0</sup> | b <sup>0++</sup> | Seq. | y           | y <sup>++</sup> | y <sup>*</sup> | y <sup>*++</sup> | y <sup>0</sup> | y <sup>0++</sup> | #  |
|----|-------------|-----------------|----------------|------------------|----------------|------------------|------|-------------|-----------------|----------------|------------------|----------------|------------------|----|
| 1  | 130.049869  | 65.528572       |                |                  | 112.039304     | 56.523290        | E    |             |                 |                |                  |                |                  | 16 |
| 2  | 229.118283  | 115.062780      |                |                  | 211.107718     | 106.057497       | V    | 1723.005374 | 862.006325      | 1705.978825    | 853.493050       | 1704.994809    | 853.001042       | 15 |
| 3  | 326.171047  | 163.589161      |                |                  | 308.160482     | 154.583879       | P    | 1623.936960 | 812.472118      | 1606.910411    | 803.958843       | 1605.926395    | 803.466835       | 14 |
| 4  | 425.239461  | 213.123369      |                |                  | 407.228896     | 204.118086       | V    | 1526.884196 | 763.945736      | 1509.857647    | 755.432461       | 1508.873631    | 754.940453       | 13 |
| 5  | 538.323525  | 269.665401      |                |                  | 520.312960     | 260.660118       | I    | 1427.815782 | 714.411529      | 1410.789233    | 705.898254       | 1409.805217    | 705.406246       | 12 |
| 6  | 685.391939  | 343.199608      |                |                  | 667.381374     | 334.194325       | F    | 1314.731718 | 657.869497      | 1297.705169    | 649.356222       | 1296.721153    | 648.864214       | 11 |
| 7  | 798.476003  | 399.741640      |                |                  | 780.465438     | 390.736357       | I    | 1167.663304 | 584.335290      | 1150.636755    | 575.822016       | 1149.652739    | 575.330007       | 10 |
| 8  | 935.534915  | 468.271096      |                |                  | 917.524350     | 459.265813       | H    | 1054.579240 | 527.793258      | 1037.552691    | 519.279983       | 1036.568675    | 518.787975       | 9  |
| 9  | 1032.587679 | 516.797478      |                |                  | 1014.577114    | 507.792195       | P    | 917.520328  | 459.263802      | 900.493779     | 450.750527       | 899.509763     | 450.258519       | 8  |
| 10 | 1145.671743 | 573.339509      |                |                  | 1127.661178    | 564.334227       | L    | 820.467564  | 410.737420      | 803.441015     | 402.224145       | 802.456999     | 401.732137       | 7  |
| 11 | 1259.714670 | 630.360973      | 1242.688121    | 621.847698       | 1241.704105    | 621.355690       | N    | 707.383500  | 354.195388      | 690.356951     | 345.682113       | 689.372935     | 345.190105       | 6  |
| 12 | 1360.762349 | 680.884812      | 1343.735800    | 672.371538       | 1342.751784    | 671.879530       | T    | 593.340573  | 297.173925      | 576.314024     | 288.660650       | 575.330008     | 288.168642       | 5  |
| 13 | 1417.783813 | 709.395544      | 1400.757264    | 700.882270       | 1399.773248    | 700.390262       | G    | 492.292894  | 246.650085      | 475.266345     | 238.136810       |                |                  | 4  |
| 14 | 1530.867877 | 765.937576      | 1513.841328    | 757.424302       | 1512.857312    | 756.932294       | L    | 435.271430  | 218.139353      | 418.244881     | 209.626078       |                |                  | 3  |
| 15 | 1677.936291 | 839.471783      | 1660.909742    | 830.958509       | 1659.925726    | 830.466501       | F    | 322.187366  | 161.597321      | 305.160817     | 153.084047       |                |                  | 2  |
| 16 |             |                 |                |                  |                |                  | R    | 175.118952  | 88.063114       | 158.092403     | 79.549839        |                |                  | 1  |

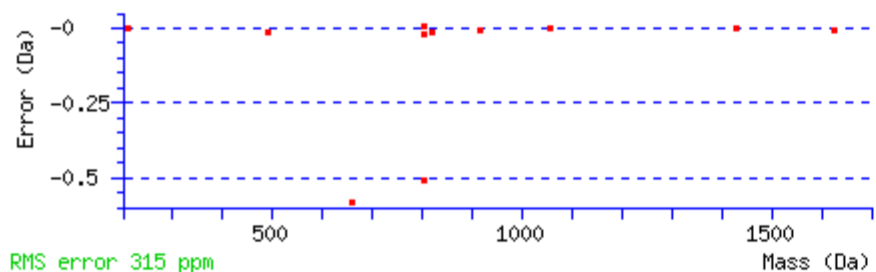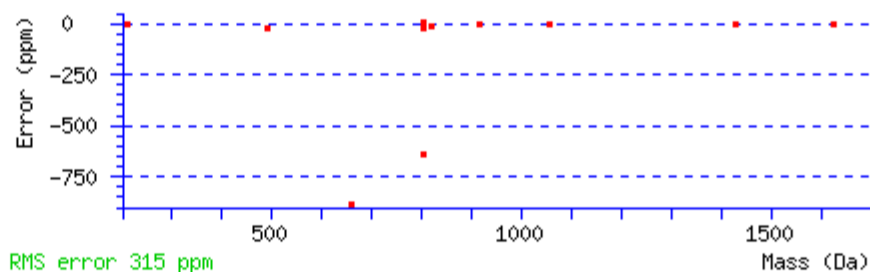

NCBI BLAST search of [EVPVIFIHPLNTGLFR](#)

(Parameters: blastp, nr protein database, expect=20000, no filter, PAM30)

Other BLAST [web gateways](#)

All matches to this query

| Score | Mr(calc):   | Delta     | Sequence                         |
|-------|-------------|-----------|----------------------------------|
| 30.7  | 1851.040695 | -0.006213 | <a href="#">EVPVIFIHPLNTGLFR</a> |

Mascot: <http://www.matrixscience.com/>

# Mascot Search Results

## Peptide View

MS/MS Fragmentation of **EGLTLSDAEQK**

Found in **REPS1\_HUMAN**, RalBP1-associated Eps domain-containing protein 1 OS=Homo sapiens GN=REPS1 PE=1 SV=3

Match to Query 508181: 1189.588268 from(595.801410,2+) rtinseconds(1854) index(344508)

Title: Locus:1.1.1.1046.19

Data file C:\Program Files (x86)\Matrix Science\Mascot Daemon\mgf3 TFD - Epitel - R2\mascot\_daemon\_merge.mgf

Click mouse within plot area to zoom in by factor of two about that point

Or, Plot from  to  Da

Label all possible matches  Label matches used for scoring

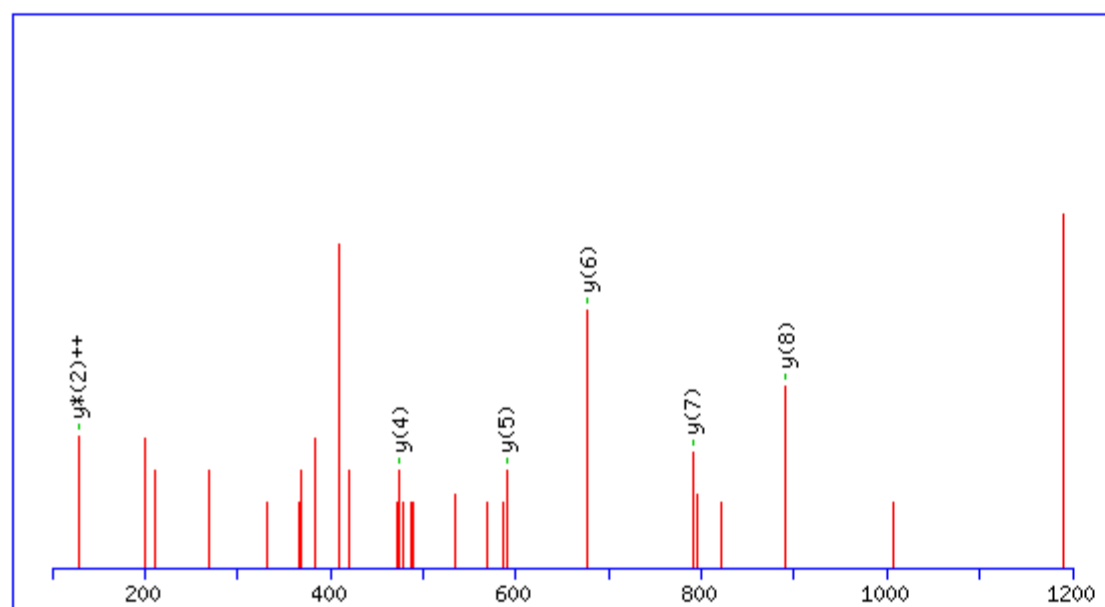

Monoisotopic mass of neutral peptide Mr(calc): 1189.582626

Fixed modifications: Carbamidomethyl (C) (apply to specified residues or termini only)

Ions Score: 35 Expect: 0.0047

Matches : 6/98 fragment ions using 9 most intense peaks [\(help\)](#)

| #  | b           | b <sup>++</sup> | b <sup>*</sup> | b <sup>+++</sup> | b <sup>0</sup> | b <sup>0++</sup> | Seq. | y                 | y <sup>++</sup> | y <sup>*</sup> | y <sup>+++</sup>  | y <sup>0</sup> | y <sup>0++</sup> | #  |
|----|-------------|-----------------|----------------|------------------|----------------|------------------|------|-------------------|-----------------|----------------|-------------------|----------------|------------------|----|
| 1  | 130.049869  | 65.528572       |                |                  | 112.039304     | 56.523290        | E    |                   |                 |                |                   |                |                  | 11 |
| 2  | 187.071333  | 94.039305       |                |                  | 169.060768     | 85.034022        | G    | 1061.547331       | 531.277304      | 1044.520782    | 522.764029        | 1043.536766    | 522.272021       | 10 |
| 3  | 300.155397  | 150.581336      |                |                  | 282.144832     | 141.576054       | L    | 1004.525867       | 502.766572      | 987.499318     | 494.253297        | 986.515302     | 493.761289       | 9  |
| 4  | 401.203076  | 201.105176      |                |                  | 383.192511     | 192.099894       | T    | <b>891.441803</b> | 446.224540      | 874.415254     | 437.711265        | 873.431238     | 437.219257       | 8  |
| 5  | 514.287140  | 257.647208      |                |                  | 496.276575     | 248.641926       | L    | <b>790.394124</b> | 395.700700      | 773.367575     | 387.187426        | 772.383559     | 386.695418       | 7  |
| 6  | 601.319168  | 301.163222      |                |                  | 583.308603     | 292.157940       | S    | <b>677.310060</b> | 339.158668      | 660.283511     | 330.645394        | 659.299495     | 330.153386       | 6  |
| 7  | 716.346111  | 358.676694      |                |                  | 698.335546     | 349.671411       | D    | <b>590.278032</b> | 295.642654      | 573.251483     | 287.129380        | 572.267467     | 286.637372       | 5  |
| 8  | 787.383225  | 394.195250      |                |                  | 769.372660     | 385.189968       | A    | <b>475.251089</b> | 238.129183      | 458.224540     | 229.615908        | 457.240524     | 229.123900       | 4  |
| 9  | 916.425818  | 458.716547      |                |                  | 898.415253     | 449.711264       | E    | 404.213975        | 202.610626      | 387.187426     | 194.097351        | 386.203410     | 193.605343       | 3  |
| 10 | 1044.484396 | 522.745836      | 1027.457847    | 514.232562       | 1026.473831    | 513.740554       | Q    | 275.171382        | 138.089329      | 258.144833     | <b>129.576055</b> |                |                  | 2  |
| 11 |             |                 |                |                  |                |                  | K    | 147.112804        | 74.060040       | 130.086255     | 65.546765         |                |                  | 1  |

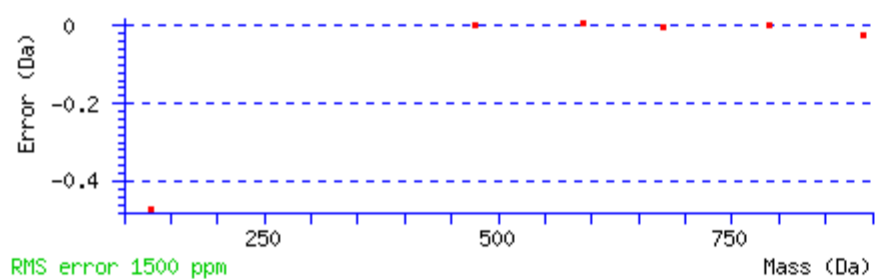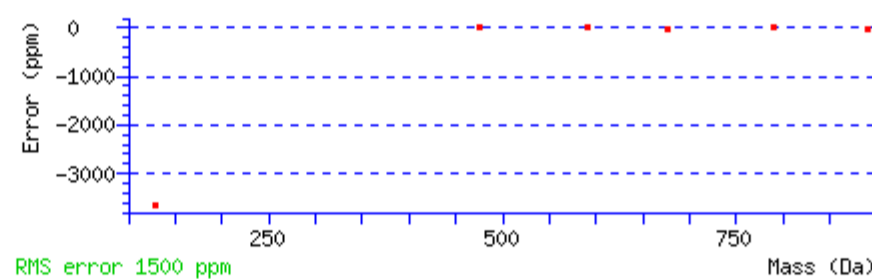

NCBI BLAST search of [EGLTLSDAEQK](#)

(Parameters: blastp, nr protein database, expect=20000, no filter, PAM30)

Other BLAST [web gateways](#)

## All matches to this query

| Score | Mr(calc):   | Delta     | Sequence                    |
|-------|-------------|-----------|-----------------------------|
| 34.7  | 1189.582626 | 0.005642  | <a href="#">EGLTLSDAEQK</a> |
| 10.5  | 1189.590042 | -0.001774 | <a href="#">GEITPELLGVM</a> |
| 1.5   | 1189.593872 | -0.005604 | <a href="#">QPSSSPSSIIR</a> |
| 0.6   | 1189.597885 | -0.009617 | <a href="#">AEEVFTLPER</a>  |

Mascot: <http://www.matrixscience.com/>

# MASCOT Search Results

## Peptide View

MS/MS Fragmentation of **QTFVLAPEGSVANK**

Found in **G3BP1\_HUMAN**, Ras GTPase-activating protein-binding protein 1 OS=Homo sapiens GN=G3BP1 PE=1 SV=1

Match to Query 803236: 1459.765708 from(730.890130,2+) rtinseconds(2352) index(518680)

Title: Locus:1.1.1.1230.43

Data file C:\Program Files (x86)\Matrix Science\Mascot Daemon\mgf3 TFD - Epitel - R2\mascot\_daemon\_merge.mgf

Click mouse within plot area to zoom in by factor of two about that point

Or, Plot from  to  Da

Label all possible matches  Label matches used for scoring

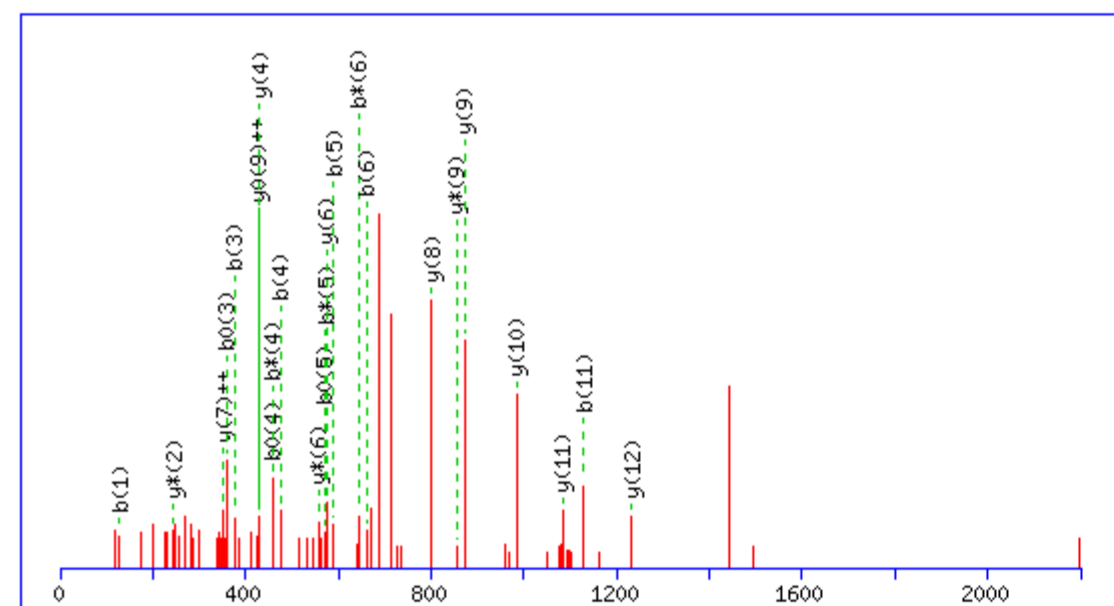

Monoisotopic mass of neutral peptide Mr(calc): 1459.767090

Fixed modifications: Carbamidomethyl (C) (apply to specified residues or termini only)

Ions Score: 37 Expect: 0.0019

Matches : 24/146 fragment ions using 46 most intense peaks [\(help\)](#)

| #  | b                  | b <sup>++</sup> | b <sup>*</sup>    | b <sup>*++</sup> | b <sup>0</sup>    | b <sup>0++</sup> | Seq.     | y                  | y <sup>++</sup>   | y <sup>*</sup>    | y <sup>*++</sup> | y <sup>0</sup> | y <sup>0++</sup>  | #         |
|----|--------------------|-----------------|-------------------|------------------|-------------------|------------------|----------|--------------------|-------------------|-------------------|------------------|----------------|-------------------|-----------|
| 1  | <b>129.065854</b>  | 65.036565       | 112.039305        | 56.523291        |                   |                  | <b>Q</b> |                    |                   |                   |                  |                |                   | <b>14</b> |
| 2  | 230.113533         | 115.560405      | 213.086984        | 107.047130       | 212.102968        | 106.555122       | <b>T</b> | 1332.715793        | 666.861535        | 1315.689244       | 658.348260       | 1314.705228    | 657.856252        | <b>13</b> |
| 3  | <b>377.181947</b>  | 189.094611      | 360.155398        | 180.581337       | <b>359.171382</b> | 180.089329       | <b>F</b> | <b>1231.668114</b> | 616.337695        | 1214.641565       | 607.824421       | 1213.657549    | 607.332413        | <b>12</b> |
| 4  | <b>476.250361</b>  | 238.628818      | <b>459.223812</b> | 230.115544       | <b>458.239796</b> | 229.623536       | <b>V</b> | <b>1084.599700</b> | 542.803488        | 1067.573151       | 534.290214       | 1066.589135    | 533.798206        | <b>11</b> |
| 5  | <b>589.334425</b>  | 295.170851      | <b>572.307876</b> | 286.657576       | <b>571.323860</b> | 286.165568       | <b>L</b> | <b>985.531286</b>  | 493.269281        | 968.504737        | 484.756007       | 967.520721     | 484.263999        | <b>10</b> |
| 6  | <b>660.371539</b>  | 330.689408      | <b>643.344990</b> | 322.176133       | 642.360974        | 321.684125       | <b>A</b> | <b>872.447222</b>  | 436.727249        | <b>855.420673</b> | 428.213975       | 854.436657     | <b>427.721967</b> | <b>9</b>  |
| 7  | 757.424303         | 379.215790      | 740.397754        | 370.702515       | 739.413738        | 370.210507       | <b>P</b> | <b>801.410108</b>  | 401.208692        | 784.383559        | 392.695418       | 783.399543     | 392.203410        | <b>8</b>  |
| 8  | 886.466896         | 443.737086      | 869.440347        | 435.223812       | 868.456331        | 434.731804       | <b>E</b> | 704.357344         | <b>352.682310</b> | 687.330795        | 344.169036       | 686.346779     | 343.677028        | <b>7</b>  |
| 9  | 943.488360         | 472.247818      | 926.461811        | 463.734544       | 925.477795        | 463.242536       | <b>G</b> | <b>575.314751</b>  | 288.161014        | <b>558.288202</b> | 279.647739       | 557.304186     | 279.155731        | <b>6</b>  |
| 10 | 1030.520388        | 515.763832      | 1013.493839       | 507.250558       | 1012.509823       | 506.758550       | <b>S</b> | 518.293287         | 259.650282        | 501.266738        | 251.137007       | 500.282722     | 250.644999        | <b>5</b>  |
| 11 | <b>1129.588802</b> | 565.298039      | 1112.562253       | 556.784765       | 1111.578237       | 556.292757       | <b>V</b> | <b>431.261259</b>  | 216.134267        | 414.234710        | 207.620993       |                |                   | <b>4</b>  |
| 12 | 1200.625916        | 600.816596      | 1183.599367       | 592.303322       | 1182.615351       | 591.811314       | <b>A</b> | 332.192845         | 166.600060        | 315.166296        | 158.086786       |                |                   | <b>3</b>  |
| 13 | 1314.668843        | 657.838060      | 1297.642294       | 649.324785       | 1296.658278       | 648.832777       | <b>N</b> | 261.155731         | 131.081503        | <b>244.129182</b> | 122.568229       |                |                   | <b>2</b>  |
| 14 |                    |                 |                   |                  |                   |                  | <b>K</b> | 147.112804         | 74.060040         | 130.086255        | 65.546765        |                |                   | <b>1</b>  |

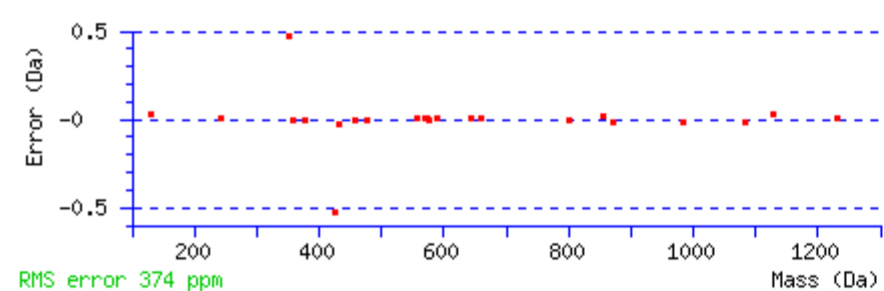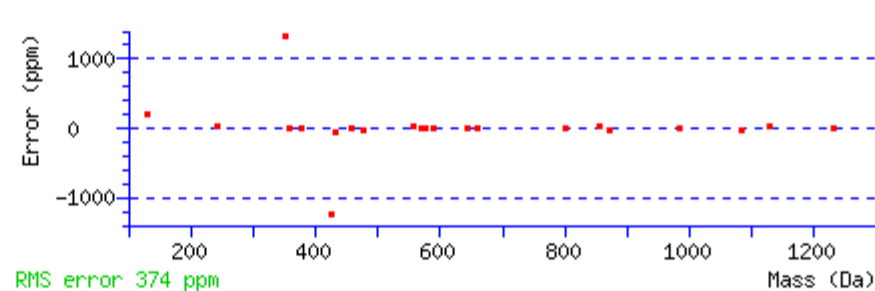

NCBI BLAST search of **QTFVLAPEGSVANK**

(Parameters: blastp, nr protein database, expect=20000, no filter, PAM30)

Other BLAST [web gateways](#)

## All matches to this query

| Score | Mr(calc):   | Delta     | Sequence                       |
|-------|-------------|-----------|--------------------------------|
| 37.2  | 1459.767090 | -0.001382 | <a href="#">QTFVLAPEGSVANK</a> |
| 7.7   | 1459.763077 | 0.002631  | <a href="#">SRDVVDESVSLR</a>   |
| 2.7   | 1459.767075 | -0.001367 | <a href="#">GVVIKYSEPPEAR</a>  |
| 2.6   | 1459.767075 | -0.001367 | <a href="#">GVVIKYSEPPEAR</a>  |
| 1.7   | 1459.778320 | -0.012612 | <a href="#">TQWKTQIQNVSK</a>   |

Mascot: <http://www.matrixscience.com/>

# Mascot Search Results

## Peptide View

MS/MS Fragmentation of **VEAKPEVQSQPPR**

Found in **G3BP2\_HUMAN**, Ras GTPase-activating protein-binding protein 2 OS=Homo sapiens GN=G3BP2 PE=1 SV=2

Match to Query 38586: 1463.769912 from(488.930580,3+) rtinseconds(978) index(2622)

Title: Locus:1.1.1.1883.26

Data file 2011-11-12 - TFD - EP 5-3.mgf

Click mouse within plot area to zoom in by factor of two about that point

Or, Plot from  to  Da

Label all possible matches  Label matches used for scoring

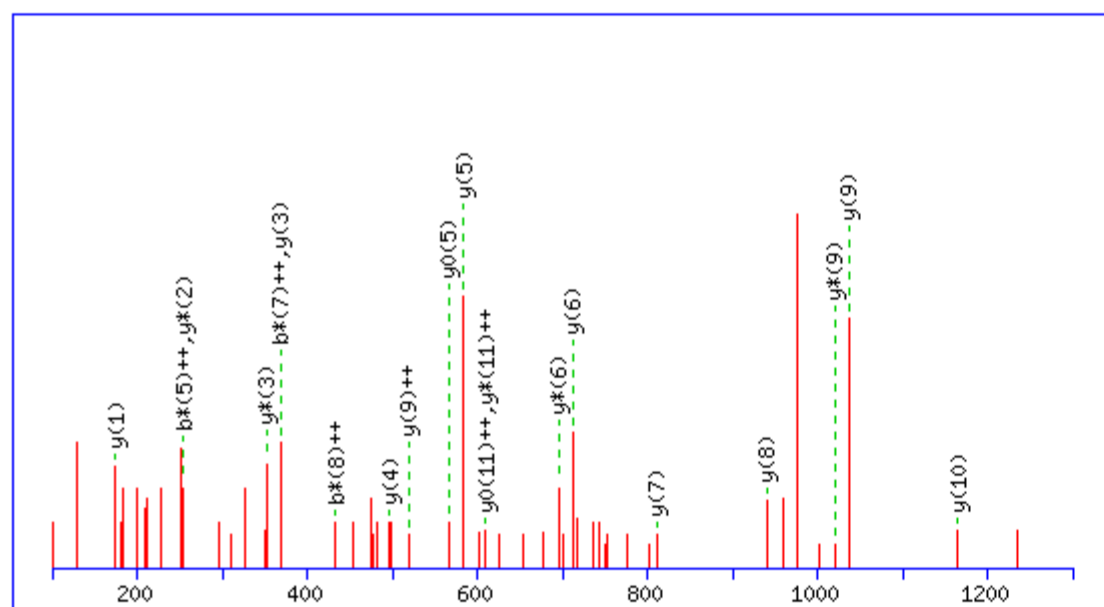

Monoisotopic mass of neutral peptide Mr(calc): 1463.773224

Fixed modifications: Propionamide (C) (apply to specified residues or termini only)

Ions Score: 53 Expect: 1.1e-005

Matches : 20/128 fragment ions using 31 most intense peaks ([help](#))

| #  | b           | b <sup>++</sup> | b <sup>*</sup> | b <sup>*++</sup> | b <sup>0</sup> | b <sup>0++</sup> | Seq. | y           | y <sup>++</sup> | y <sup>*</sup> | y <sup>*++</sup> | y <sup>0</sup> | y <sup>0++</sup> | #  |
|----|-------------|-----------------|----------------|------------------|----------------|------------------|------|-------------|-----------------|----------------|------------------|----------------|------------------|----|
| 1  | 100.075690  | 50.541483       |                |                  |                |                  | V    |             |                 |                |                  |                |                  | 13 |
| 2  | 229.118283  | 115.062780      |                |                  | 211.107718     | 106.057497       | E    | 1365.712105 | 683.359691      | 1348.685556    | 674.846416       | 1347.701540    | 674.354408       | 12 |
| 3  | 300.155397  | 150.581337      |                |                  | 282.144832     | 141.576054       | A    | 1236.669512 | 618.838394      | 1219.642963    | 610.325120       | 1218.658947    | 609.833112       | 11 |
| 4  | 428.250360  | 214.628818      | 411.223811     | 206.115544       | 410.239795     | 205.623536       | K    | 1165.632398 | 583.319837      | 1148.605849    | 574.806563       | 1147.621833    | 574.314554       | 10 |
| 5  | 525.303124  | 263.155200      | 508.276575     | 254.641926       | 507.292559     | 254.149918       | P    | 1037.537435 | 519.272356      | 1020.510886    | 510.759081       | 1019.526870    | 510.267073       | 9  |
| 6  | 654.345717  | 327.676497      | 637.319168     | 319.163222       | 636.335152     | 318.671214       | E    | 940.484671  | 470.745974      | 923.458122     | 462.232699       | 922.474106     | 461.740691       | 8  |
| 7  | 753.414131  | 377.210704      | 736.387582     | 368.697429       | 735.403566     | 368.205421       | V    | 811.442078  | 406.224677      | 794.415529     | 397.711403       | 793.431513     | 397.219395       | 7  |
| 8  | 881.472709  | 441.239993      | 864.446160     | 432.726718       | 863.462144     | 432.234710       | Q    | 712.373664  | 356.690470      | 695.347115     | 348.177196       | 694.363099     | 347.685188       | 6  |
| 9  | 968.504737  | 484.756007      | 951.478188     | 476.242732       | 950.494172     | 475.750724       | S    | 584.315086  | 292.661181      | 567.288537     | 284.147907       | 566.304521     | 283.655899       | 5  |
| 10 | 1096.563315 | 548.785296      | 1079.536766    | 540.272021       | 1078.552750    | 539.780013       | Q    | 497.283058  | 249.145167      | 480.256509     | 240.631892       |                |                  | 4  |
| 11 | 1193.616079 | 597.311678      | 1176.589530    | 588.798403       | 1175.605514    | 588.306395       | P    | 369.224480  | 185.115878      | 352.197931     | 176.602603       |                |                  | 3  |
| 12 | 1290.668843 | 645.838060      | 1273.642294    | 637.324785       | 1272.658278    | 636.832777       | P    | 272.171716  | 136.589496      | 255.145167     | 128.076221       |                |                  | 2  |
| 13 |             |                 |                |                  |                |                  | R    | 175.118952  | 88.063114       | 158.092403     | 79.549839        |                |                  | 1  |

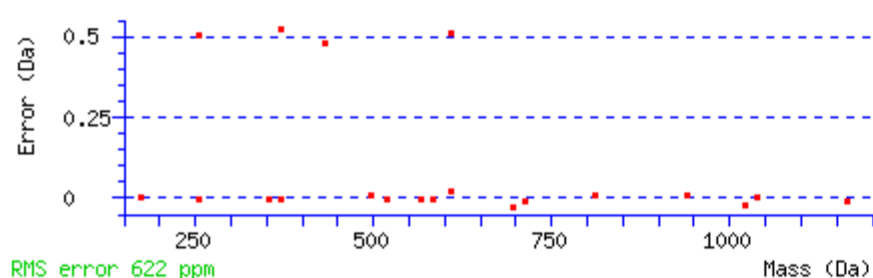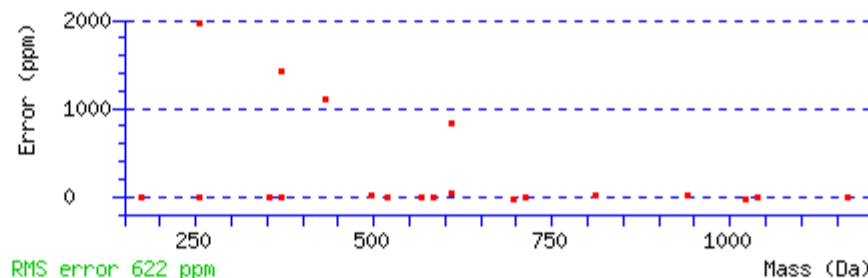

NCBI BLAST search of **VEAKPEVQSQPPR**

(Parameters: blastp, nr protein database, expect=20000, no filter, PAM30)

Other BLAST [web gateways](#)

All matches to this query

| Score | Mr(calc):   | Delta     | Sequence                      |
|-------|-------------|-----------|-------------------------------|
| 53.0  | 1463.773224 | -0.003312 | <a href="#">VEAKPEVQSQPPR</a> |
| 0.2   | 1463.784454 | -0.014542 | <a href="#">QRVLIQHQHEDAK</a> |

Mascot: <http://www.matrixscience.com/>

# **MASCOT** Mascot Search Results

## Peptide View

MS/MS Fragmentation of **SENLSLRR**

Found in **RAIN\_HUMAN**, Ras-interacting protein 1 OS=Homo sapiens GN=RASIP1 PE=1 SV=1

Match to Query 11570: 973.530068 from(487.772310,2+) rtinseconds(1913) index(21171)

Title: Locus:1.1.1.2097.21

Data file 2011-11-12 - TFD - EP 6-3.mgf

Click mouse within plot area to zoom in by factor of two about that point

Or, Plot from  to  Da

Label all possible matches  Label matches used for scoring

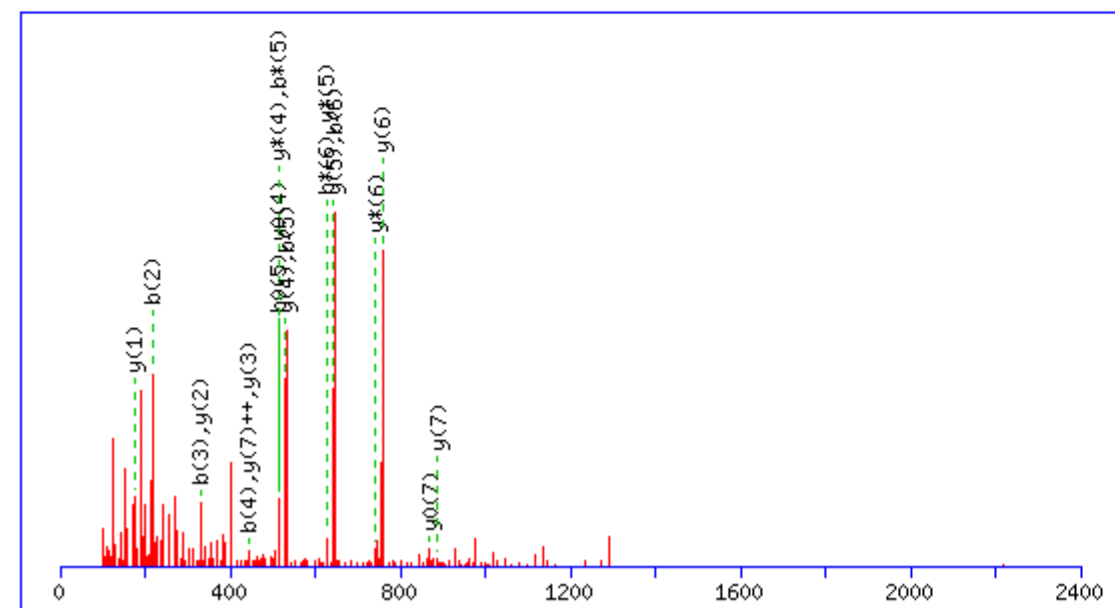

Monoisotopic mass of neutral peptide Mr(calc): 973.530457

Fixed modifications: Propionamide (C) (apply to specified residues or termini only)

Ions Score: 35 Expect: 0.0033

Matches : 21/74 fragment ions using 36 most intense peaks [\(help\)](#)

| # | b                 | b <sup>++</sup> | b <sup>*</sup>    | b <sup>*++</sup> | b <sup>0</sup>    | b <sup>0++</sup> | Seq. | y                 | y <sup>++</sup>   | y <sup>*</sup>    | y <sup>*++</sup> | y <sup>0</sup>    | y <sup>0++</sup> | # |
|---|-------------------|-----------------|-------------------|------------------|-------------------|------------------|------|-------------------|-------------------|-------------------|------------------|-------------------|------------------|---|
| 1 | 88.039304         | 44.523290       |                   |                  | 70.028739         | 35.518008        | S    |                   |                   |                   |                  |                   |                  | 8 |
| 2 | <b>217.081897</b> | 109.044586      |                   |                  | 199.071332        | 100.039304       | E    | <b>887.505739</b> | <b>444.256508</b> | 870.479190        | 435.743233       | <b>869.495174</b> | 435.251225       | 7 |
| 3 | <b>331.124824</b> | 166.066050      | 314.098275        | 157.552776       | 313.114259        | 157.060768       | N    | <b>758.463146</b> | 379.735211        | <b>741.436597</b> | 371.221937       | 740.452581        | 370.729929       | 6 |
| 4 | <b>444.208888</b> | 222.608082      | 427.182339        | 214.094808       | 426.198323        | 213.602800       | L    | <b>644.420219</b> | 322.713748        | <b>627.393670</b> | 314.200473       | 626.409654        | 313.708465       | 5 |
| 5 | <b>531.240916</b> | 266.124096      | <b>514.214367</b> | 257.610822       | <b>513.230351</b> | 257.118814       | S    | <b>531.336155</b> | 266.171716        | <b>514.309606</b> | 257.658441       | <b>513.325590</b> | 257.166433       | 4 |
| 6 | <b>644.324980</b> | 322.666128      | <b>627.298431</b> | 314.152854       | 626.314415        | 313.660846       | L    | <b>444.304127</b> | 222.655701        | 427.277578        | 214.142427       |                   |                  | 3 |
| 7 | 800.426091        | 400.716684      | 783.399542        | 392.203409       | 782.415526        | 391.711401       | R    | <b>331.220063</b> | 166.113669        | 314.193514        | 157.600395       |                   |                  | 2 |
| 8 |                   |                 |                   |                  |                   |                  | R    | <b>175.118952</b> | 88.063114         | 158.092403        | 79.549839        |                   |                  | 1 |

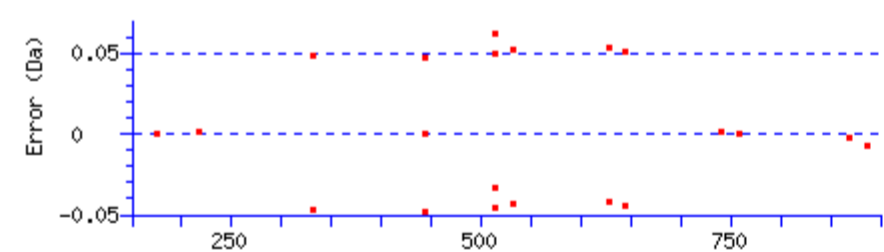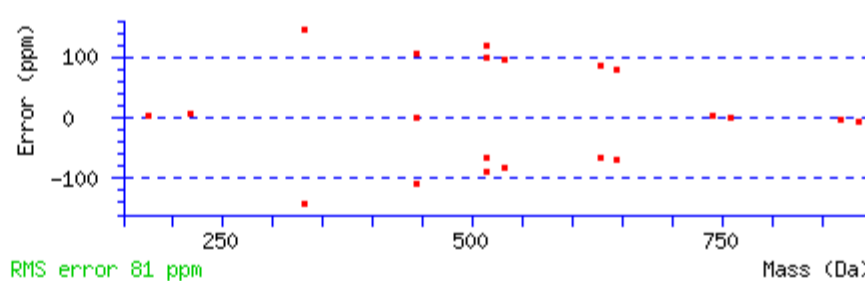

NCBI BLAST search of [SENLSLRR](#)

(Parameters: blastp, nr protein database, expect=20000, no filter, PAM30)

Other BLAST [web gateways](#)

All matches to this query

| Score | Mr(calc):  | Delta     | Sequence                   |
|-------|------------|-----------|----------------------------|
| 35.3  | 973.530457 | -0.000389 | <a href="#">SENLSLRR</a>   |
| 14.2  | 973.523285 | 0.006783  | <a href="#">DTLLPPFR</a>   |
| 14.2  | 973.523285 | 0.006783  | <a href="#">DTLLPPFR</a>   |
| 9.6   | 973.530487 | -0.000419 | <a href="#">LTSTQPRR</a>   |
| 7.3   | 973.530472 | -0.000404 | <a href="#">SAPTALSRR</a>  |
| 7.0   | 973.523270 | 0.006798  | <a href="#">AFAGPLSPAK</a> |
| 6.1   | 973.530472 | -0.000404 | <a href="#">STVREINR</a>   |
| 5.6   | 973.530472 | -0.000404 | <a href="#">LSSDQIRR</a>   |
| 5.0   | 973.530457 | -0.000389 | <a href="#">SENSRIIR</a>   |
| 3.7   | 973.534485 | -0.004417 | <a href="#">AKPFQNAAK</a>  |

# MASCOT SEARCH RESULTS

## Peptide View

MS/MS Fragmentation of **SIIFANYIAR**

Found in **RRAGA\_HUMAN**, Ras-related GTP-binding protein A OS=Homo sapiens GN=RRAGA PE=1 SV=1

Match to Query 28865: 1166.644908 from(584.329730,2+) rtinseconds(3087) index(43217)

Title: Locus:1.1.1.2558.12

Data file 2011-11-14 - TFD - EP 8-4.mgf

Click mouse within plot area to zoom in by factor of two about that point

Or, Plot from  to  Da

Label all possible matches  Label matches used for scoring

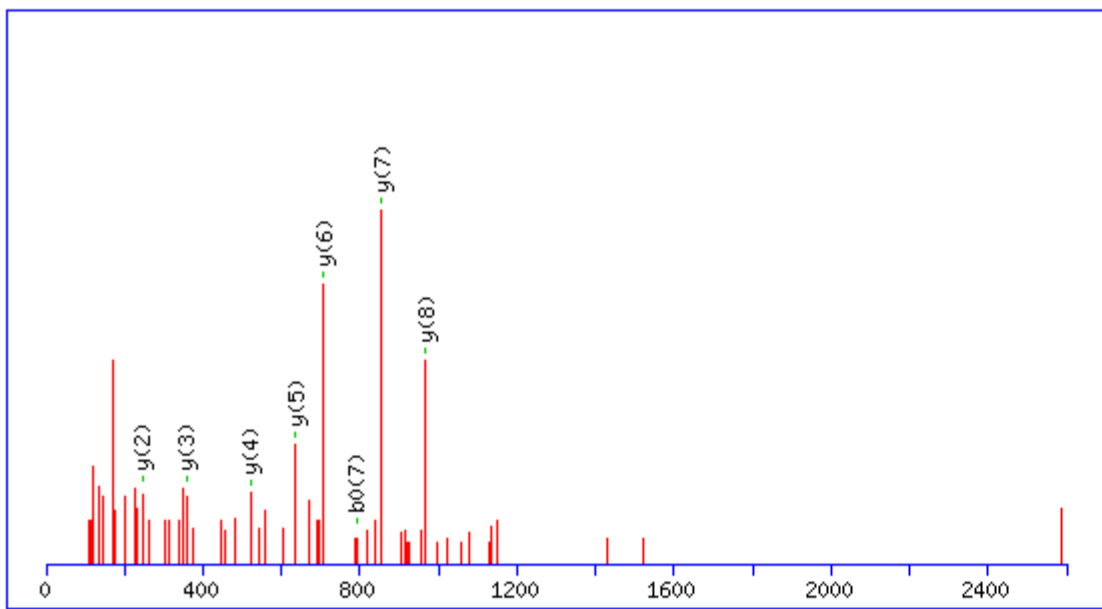

Monoisotopic mass of neutral peptide  $M_r(\text{calc})$ : 1166.644760

Fixed modifications: Propionamide (C) (apply to specified residues or termini only)

Ions Score: 36 Expect: 0.0023

Matches : 8/80 fragment ions using 22 most intense peaks ([help](#))

| #  | b          | b <sup>++</sup> | b*         | b <sup>*++</sup> | b <sup>0</sup>    | b <sup>0++</sup> | Seq. | y                 | y <sup>++</sup> | y*          | y <sup>*++</sup> | #  |
|----|------------|-----------------|------------|------------------|-------------------|------------------|------|-------------------|-----------------|-------------|------------------|----|
| 1  | 88.039304  | 44.523290       |            |                  | 70.028739         | 35.518008        | S    |                   |                 |             |                  | 10 |
| 2  | 201.123368 | 101.065322      |            |                  | 183.112803        | 92.060039        | I    | 1080.620042       | 540.813659      | 1063.593493 | 532.300385       | 9  |
| 3  | 314.207432 | 157.607354      |            |                  | 296.196867        | 148.602071       | I    | <b>967.535978</b> | 484.271627      | 950.509429  | 475.758353       | 8  |
| 4  | 461.275846 | 231.141561      |            |                  | 443.265281        | 222.136278       | F    | <b>854.451914</b> | 427.729595      | 837.425365  | 419.216321       | 7  |
| 5  | 532.312960 | 266.660118      |            |                  | 514.302395        | 257.654835       | A    | <b>707.383500</b> | 354.195388      | 690.356951  | 345.682114       | 6  |
| 6  | 646.355887 | 323.681581      | 629.329338 | 315.168307       | 628.345322        | 314.676299       | N    | <b>636.346386</b> | 318.676831      | 619.319837  | 310.163557       | 5  |
| 7  | 809.419216 | 405.213246      | 792.392667 | 396.699972       | <b>791.408651</b> | 396.207964       | Y    | <b>522.303459</b> | 261.655368      | 505.276910  | 253.142093       | 4  |
| 8  | 922.503280 | 461.755278      | 905.476731 | 453.242004       | 904.492715        | 452.749996       | I    | <b>359.240130</b> | 180.123703      | 342.213581  | 171.610429       | 3  |
| 9  | 993.540394 | 497.273835      | 976.513845 | 488.760561       | 975.529829        | 488.268553       | A    | <b>246.156066</b> | 123.581671      | 229.129517  | 115.068397       | 2  |
| 10 |            |                 |            |                  |                   |                  | R    | 175.118952        | 88.063114       | 158.092403  | 79.549840        | 1  |

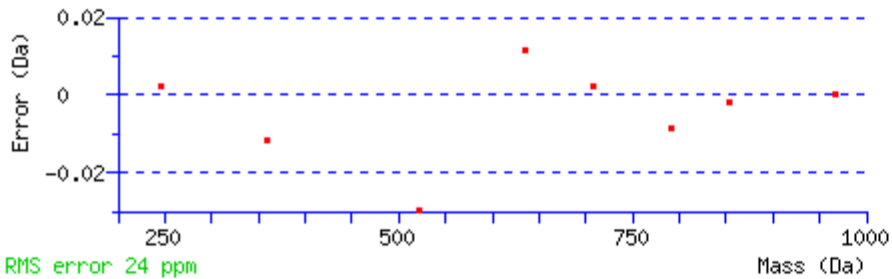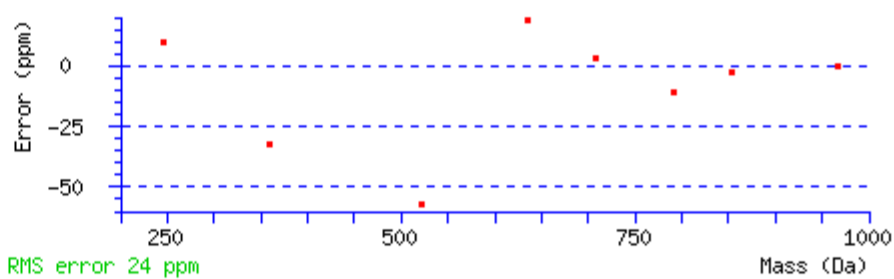

NCBI BLAST search of **SIIFANYIAR**

(Parameters: blastp, nr protein database, expect=20000, no filter, PAM30)

Other BLAST [web gateways](#)

All matches to this query

| Score | $M_r(\text{calc})$ : | Delta     | Sequence                   |
|-------|----------------------|-----------|----------------------------|
| 35.8  | 1166.644760          | 0.000148  | <a href="#">SIIFANYIAR</a> |
| 12.4  | 1166.648148          | -0.003240 | <a href="#">VTRIAYSMVK</a> |

Mascot: <http://www.matrixscience.com/>



# **MASCOT** Mascot Search Results

## Peptide View

MS/MS Fragmentation of **FLIWDTAGQER**

Found in **RAB31\_HUMAN**, Ras-related protein Rab-31 OS=Homo sapiens GN=RAB31 PE=1 SV=1

Match to Query 43496: 1334.662928 from(668.338740,2+) rtinseconds(3172) index(42705)

Title: Locus:1.1.1.2464.35

Data file 2011-11-10 - TFD - EP 4-6.mgf

Click mouse within plot area to zoom in by factor of two about that point

Or, Plot from  to  Da

Label all possible matches  Label matches used for scoring

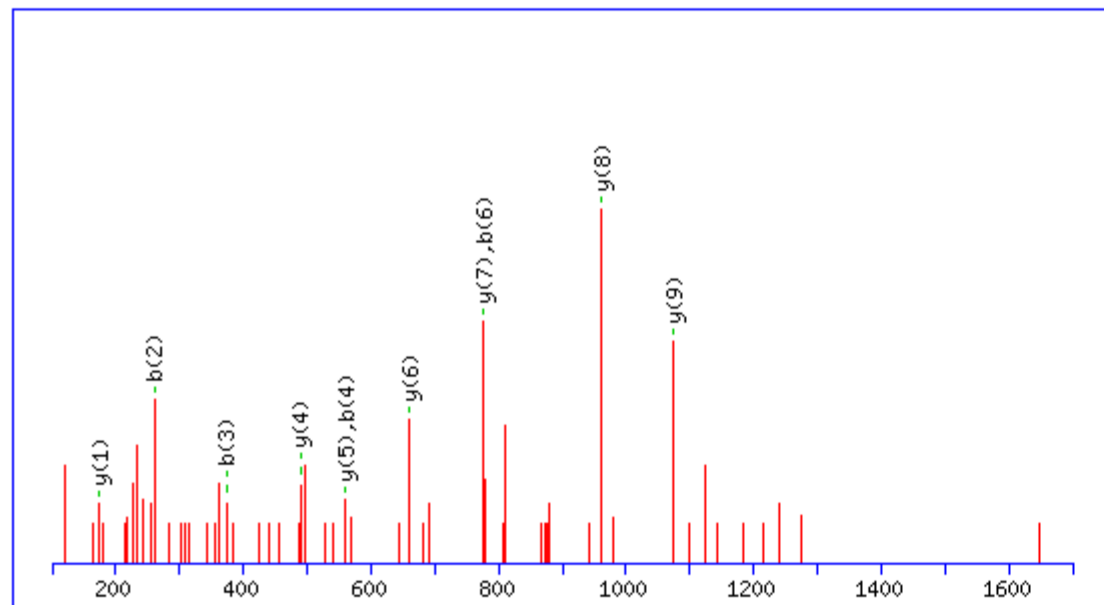

Monoisotopic mass of neutral peptide Mr(calc): 1334.661896

Fixed modifications: Propionamide (C) (apply to specified residues or termini only)

Ions Score: 32 Expect: 0.0079

Matches : 11/94 fragment ions using 24 most intense peaks ([help](#))

| #  | b                 | b <sup>++</sup> | b <sup>*</sup> | b <sup>*++</sup> | b <sup>0</sup> | b <sup>0++</sup> | Seq. | y                  | y <sup>++</sup> | y <sup>*</sup> | y <sup>*++</sup> | y <sup>0</sup> | y <sup>0++</sup> | #  |
|----|-------------------|-----------------|----------------|------------------|----------------|------------------|------|--------------------|-----------------|----------------|------------------|----------------|------------------|----|
| 1  | 148.075690        | 74.541483       |                |                  |                |                  | F    |                    |                 |                |                  |                |                  | 11 |
| 2  | <b>261.159754</b> | 131.083515      |                |                  |                |                  | L    | 1188.600764        | 594.804020      | 1171.574215    | 586.290746       | 1170.590199    | 585.798738       | 10 |
| 3  | <b>374.243818</b> | 187.625547      |                |                  |                |                  | I    | <b>1075.516700</b> | 538.261988      | 1058.490151    | 529.748714       | 1057.506135    | 529.256706       | 9  |
| 4  | <b>560.323131</b> | 280.665204      |                |                  |                |                  | W    | <b>962.432636</b>  | 481.719956      | 945.406087     | 473.206682       | 944.422071     | 472.714674       | 8  |
| 5  | 675.350074        | 338.178675      |                |                  | 657.339509     | 329.173393       | D    | <b>776.353323</b>  | 388.680300      | 759.326774     | 380.167025       | 758.342758     | 379.675017       | 7  |
| 6  | <b>776.397753</b> | 388.702515      |                |                  | 758.387188     | 379.697232       | T    | <b>661.326380</b>  | 331.166828      | 644.299831     | 322.653554       | 643.315815     | 322.161546       | 6  |
| 7  | 847.434867        | 424.221072      |                |                  | 829.424302     | 415.215789       | A    | <b>560.278701</b>  | 280.642989      | 543.252152     | 272.129714       | 542.268136     | 271.637706       | 5  |
| 8  | 904.456331        | 452.731804      |                |                  | 886.445766     | 443.726521       | G    | <b>489.241587</b>  | 245.124432      | 472.215038     | 236.611157       | 471.231022     | 236.119149       | 4  |
| 9  | 1032.514909       | 516.761093      | 1015.488360    | 508.247818       | 1014.504344    | 507.755810       | Q    | 432.220123         | 216.613700      | 415.193574     | 208.100425       | 414.209558     | 207.608417       | 3  |
| 10 | 1161.557502       | 581.282389      | 1144.530953    | 572.769115       | 1143.546937    | 572.277107       | E    | 304.161545         | 152.584411      | 287.134996     | 144.071136       | 286.150980     | 143.579128       | 2  |
| 11 |                   |                 |                |                  |                |                  | R    | <b>175.118952</b>  | 88.063114       | 158.092403     | 79.549839        |                |                  | 1  |

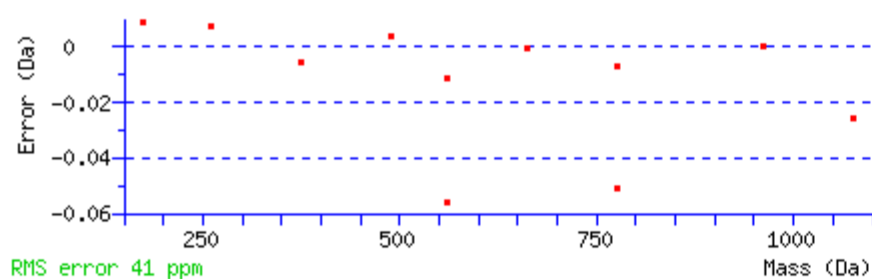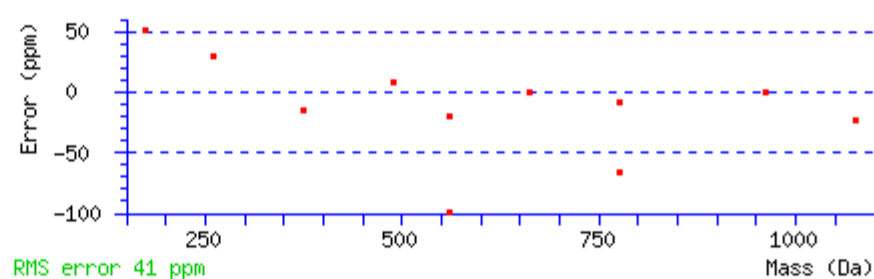

NCBI BLAST search of [FLIWDTAGQER](#)

(Parameters: blastp, nr protein database, expect=20000, no filter, PAM30)

Other BLAST [web gateways](#)

All matches to this query

| Score | Mr(calc):   | Delta    | Sequence                    |
|-------|-------------|----------|-----------------------------|
| 32.4  | 1334.661896 | 0.001032 | <a href="#">FLIWDTAGQER</a> |

Mascot: <http://www.matrixscience.com/>

# MASCOT Search Results

## Peptide View

MS/MS Fragmentation of **TGQSVDELQK**

Found in **RAB24\_HUMAN**, Ras-related protein Rab-24 OS=Homo sapiens GN=RAB24 PE=1 SV=1

Match to Query 32296: 1250.616068 from(626.315310,2+) rtinseconds(2368) index(26621)

Title: Locus:1.1.1.2169.37

Data file 2011-11-10 - TFD - EP 3-6.mgf

Click mouse within plot area to zoom in by factor of two about that point

Or, Plot from  to  Da

Label all possible matches  Label matches used for scoring

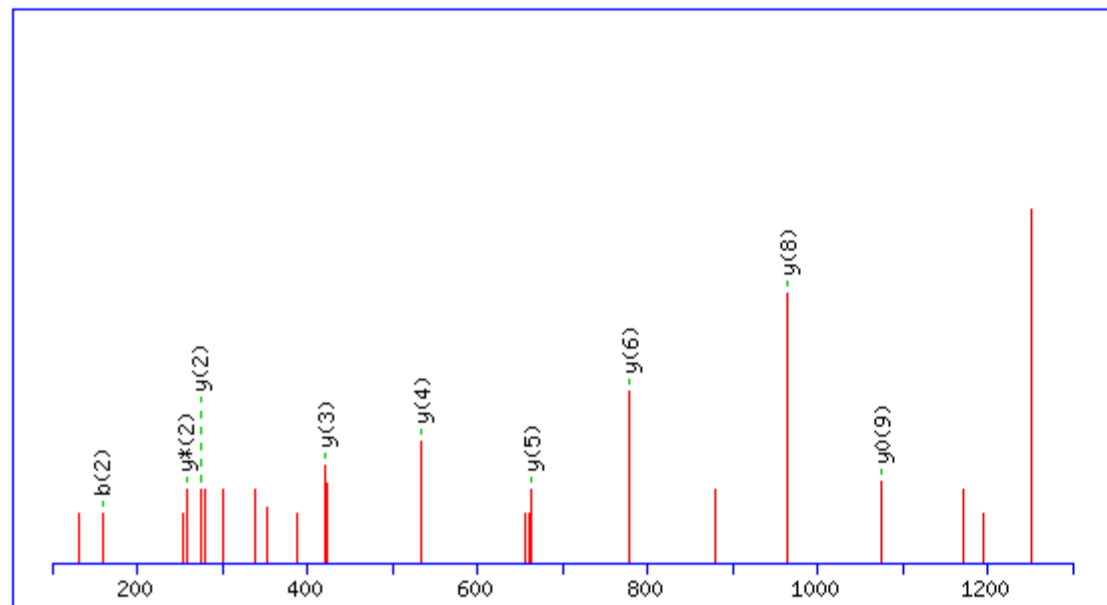

Monoisotopic mass of neutral peptide Mr(calc): 1250.614288

Fixed modifications: Propionamide (C) (apply to specified residues or termini only)

Ions Score: 38 Expect: 0.00098

Matches: 9/108 fragment ions using 15 most intense peaks ([help](#))

| #  | b           | b <sup>++</sup> | b*          | b <sup>+++</sup> | b <sup>0</sup> | b <sup>0++</sup> | Seq. | y           | y <sup>++</sup> | y*          | y <sup>+++</sup> | y <sup>0</sup> | y <sup>0++</sup> | #  |
|----|-------------|-----------------|-------------|------------------|----------------|------------------|------|-------------|-----------------|-------------|------------------|----------------|------------------|----|
| 1  | 102.054955  | 51.531116       |             |                  | 84.044390      | 42.525833        | T    |             |                 |             |                  |                |                  | 11 |
| 2  | 159.076419  | 80.041847       |             |                  | 141.065854     | 71.036565        | G    | 1150.573880 | 575.790578      | 1133.547331 | 567.277304       | 1132.563315    | 566.785296       | 10 |
| 3  | 287.134997  | 144.071136      | 270.108448  | 135.557862       | 269.124432     | 135.065854       | Q    | 1093.552416 | 547.279846      | 1076.525867 | 538.766572       | 1075.541851    | 538.274564       | 9  |
| 4  | 374.167025  | 187.587151      | 357.140476  | 179.073876       | 356.156460     | 178.581868       | S    | 965.493838  | 483.250557      | 948.467289  | 474.737283       | 947.483273     | 474.245275       | 8  |
| 5  | 473.235439  | 237.121358      | 456.208890  | 228.608083       | 455.224874     | 228.116075       | V    | 878.461810  | 439.734543      | 861.435261  | 431.221269       | 860.451245     | 430.729261       | 7  |
| 6  | 588.262382  | 294.634829      | 571.235833  | 286.121555       | 570.251817     | 285.629547       | D    | 779.393396  | 390.200336      | 762.366847  | 381.687062       | 761.382831     | 381.195054       | 6  |
| 7  | 717.304975  | 359.156126      | 700.278426  | 350.642851       | 699.294410     | 350.150843       | E    | 664.366453  | 332.686865      | 647.339904  | 324.173590       | 646.355888     | 323.681582       | 5  |
| 8  | 830.389039  | 415.698158      | 813.362490  | 407.184883       | 812.378474     | 406.692875       | L    | 535.323860  | 268.165568      | 518.297311  | 259.652294       |                |                  | 4  |
| 9  | 977.457453  | 489.232365      | 960.430904  | 480.719090       | 959.446888     | 480.227082       | F    | 422.239796  | 211.623536      | 405.213247  | 203.110261       |                |                  | 3  |
| 10 | 1105.516031 | 553.261654      | 1088.489482 | 544.748379       | 1087.505466    | 544.256371       | Q    | 275.171382  | 138.089329      | 258.144833  | 129.576055       |                |                  | 2  |
| 11 |             |                 |             |                  |                |                  | K    | 147.112804  | 74.060040       | 130.086255  | 65.546765        |                |                  | 1  |

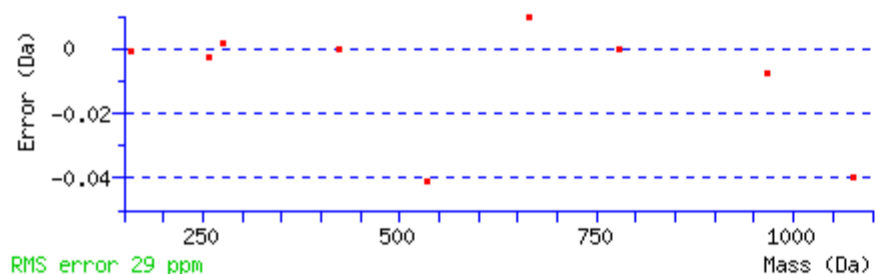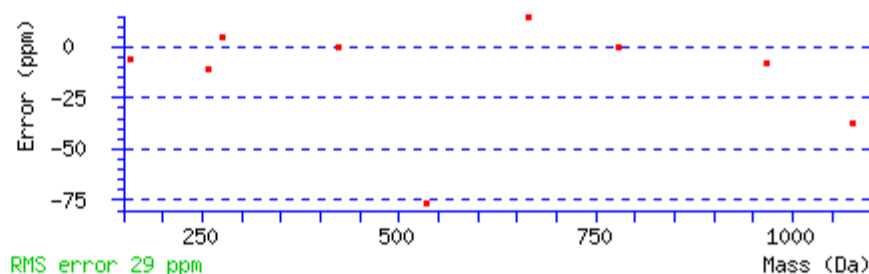

NCBI BLAST search of **TGQSVDELQK**

(Parameters: blastp, nr protein database, expect=20000, no filter, PAM30)

Other BLAST [web gateways](#)

All matches to this query

| Score | Mr(calc):   | Delta     | Sequence                     |
|-------|-------------|-----------|------------------------------|
| 37.8  | 1250.614288 | 0.001780  | <a href="#">TGQSVDELQK</a>   |
| 5.7   | 1250.617630 | -0.001562 | <a href="#">DEQSAVSMMLKK</a> |

# MASCOT SCIENCE Mascot Search Results

## Peptide View

MS/MS Fragmentation of **VVLIGESGVGK**

Found in **RAB25\_HUMAN**, Ras-related protein Rab-25 OS=Homo sapiens GN=RAB25 PE=1 SV=2

Match to Query 12319: 1056.615888 from(529.315220,2+) rtinseconds(1832) index(19532)

Title: Locus:1.1.1.1080.23

Data file 2012-01-27 - TFD - Epitel - IEC - 10ul - 2.mgf

Click mouse within plot area to zoom in by factor of two about that point

Or, Plot from  to  Da

Label all possible matches  Label matches used for scoring

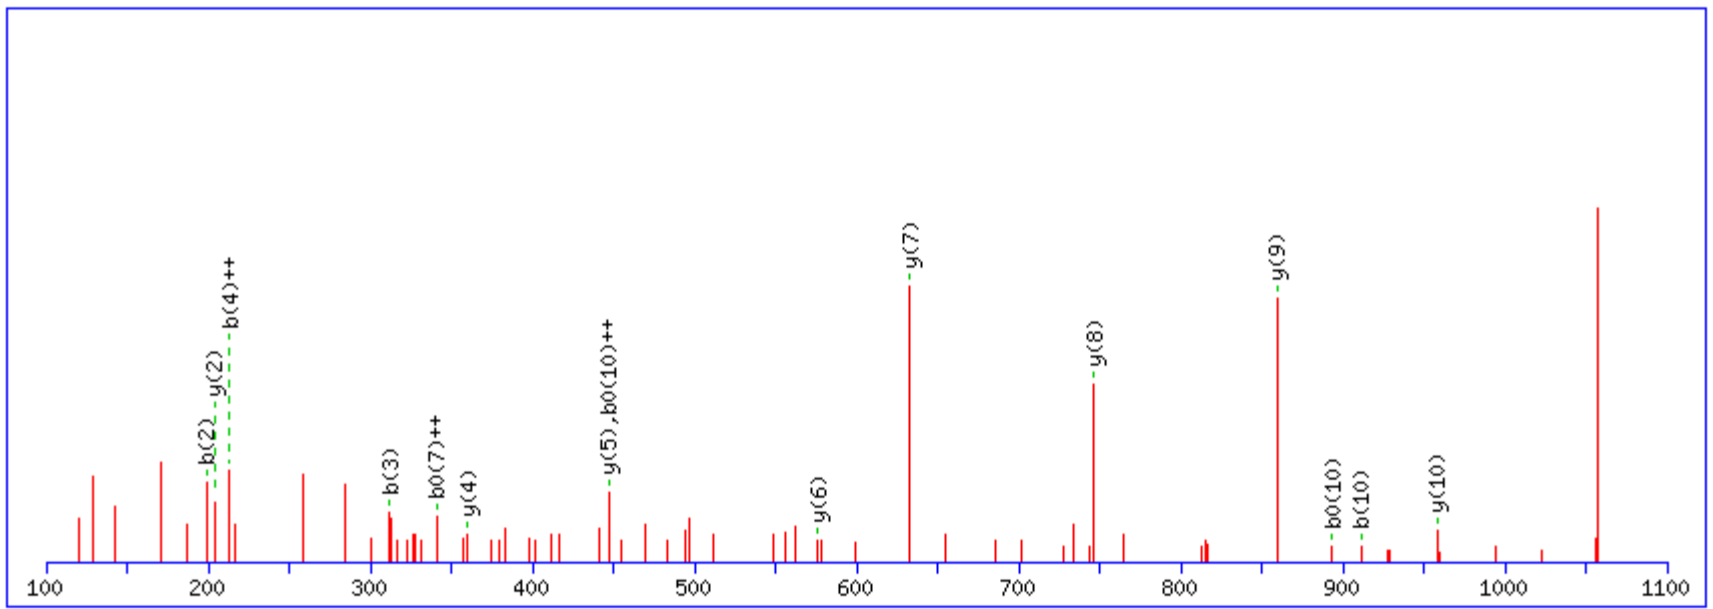

Monoisotopic mass of neutral peptide Mr(calc): 1056.617920

Fixed modifications: Carbamidomethyl (C) (apply to specified residues or termini only)

Ions Score: 35 Expect: 0.0015

Matches : 15/82 fragment ions using 44 most intense peaks [\(help\)](#)

| #  | b                 | b <sup>++</sup>   | b <sup>0</sup>    | b <sup>0++</sup>  | Seq. | y                 | y <sup>++</sup> | y <sup>*</sup> | y <sup>*++</sup> | y <sup>0</sup> | y <sup>0++</sup> | #  |
|----|-------------------|-------------------|-------------------|-------------------|------|-------------------|-----------------|----------------|------------------|----------------|------------------|----|
| 1  | 100.075690        | 50.541483         |                   |                   | V    |                   |                 |                |                  |                |                  | 11 |
| 2  | <b>199.144104</b> | 100.075690        |                   |                   | V    | <b>958.556773</b> | 479.782025      | 941.530224     | 471.268750       | 940.546208     | 470.776742       | 10 |
| 3  | <b>312.228168</b> | 156.617722        |                   |                   | L    | <b>859.488359</b> | 430.247818      | 842.461810     | 421.734543       | 841.477794     | 421.242535       | 9  |
| 4  | 425.312232        | <b>213.159754</b> |                   |                   | I    | <b>746.404295</b> | 373.705786      | 729.377746     | 365.192511       | 728.393730     | 364.700503       | 8  |
| 5  | 482.333696        | 241.670486        |                   |                   | G    | <b>633.320231</b> | 317.163754      | 616.293682     | 308.650479       | 615.309666     | 308.158471       | 7  |
| 6  | 611.376289        | 306.191783        | 593.365724        | 297.186500        | E    | <b>576.298767</b> | 288.653022      | 559.272218     | 280.139747       | 558.288202     | 279.647739       | 6  |
| 7  | 698.408317        | 349.707797        | 680.397752        | <b>340.702514</b> | S    | <b>447.256174</b> | 224.131725      | 430.229625     | 215.618450       | 429.245609     | 215.126443       | 5  |
| 8  | 755.429781        | 378.218529        | 737.419216        | 369.213246        | G    | <b>360.224146</b> | 180.615711      | 343.197597     | 172.102437       |                |                  | 4  |
| 9  | 854.498195        | 427.752736        | 836.487630        | 418.747453        | V    | 303.202682        | 152.104979      | 286.176133     | 143.591704       |                |                  | 3  |
| 10 | <b>911.519659</b> | 456.263468        | <b>893.509094</b> | <b>447.258185</b> | G    | <b>204.134268</b> | 102.570772      | 187.107719     | 94.057498        |                |                  | 2  |
| 11 |                   |                   |                   |                   | K    | 147.112804        | 74.060040       | 130.086255     | 65.546765        |                |                  | 1  |

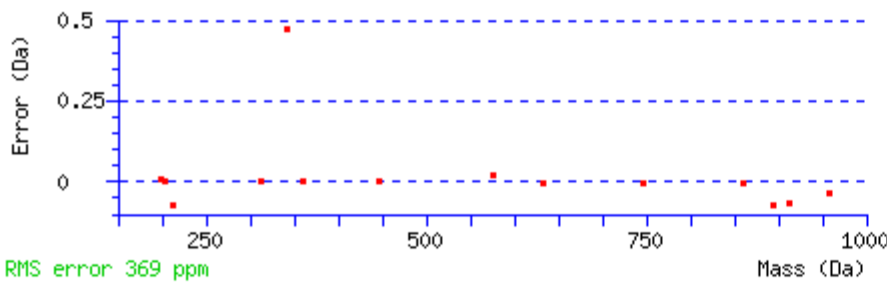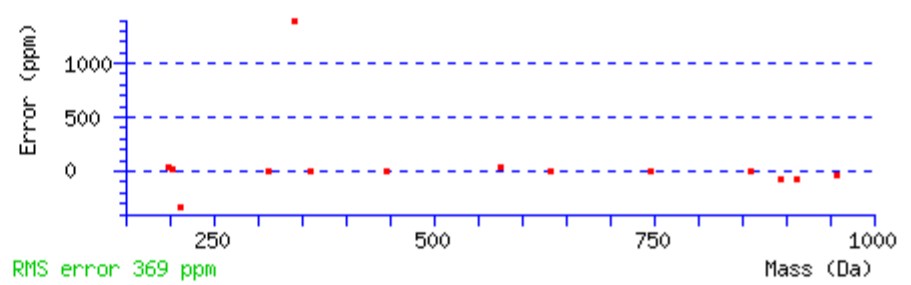

NCBI BLAST search of **VVLIGESGVGK**

(Parameters: blastp, nr protein database, expect=20000, no filter, PAM30)

Other BLAST [web gateways](#)

## All matches to this query

| Score | Mr(calc):   | Delta     | Sequence                    |
|-------|-------------|-----------|-----------------------------|
| 35.0  | 1056.617920 | -0.002032 | <a href="#">VVLIGESGVGK</a> |
| 4.8   | 1056.608017 | 0.007871  | <a href="#">KHTGVKPEK</a>   |
| 2.6   | 1056.617920 | -0.002032 | <a href="#">VILGDSGVGK</a>  |
| 1.1   | 1056.608002 | 0.007886  | <a href="#">KIVQWDIR</a>    |
| 1.1   | 1056.617874 | -0.001986 | <a href="#">KINSLPEIK</a>   |

# Mascot Search Results

## Peptide View

### MS/MS Fragmentation of LQLWDIAGQER

Found in **RAB32\_HUMAN**, Ras-related protein Rab-32 OS=Homo sapiens GN=RAB32 PE=1 SV=3

Match to Query 38170: 1327.698768 from(664.856660,2+) rtinseconds(3115) index(42019)

Title: Locus:1.1.1.2507.30

Data file 2011-11-14 - TFD - EP 8-5.mgf

Click mouse within plot area to zoom in by factor of two about that point

Or, Plot from  to  Da

Label all possible matches  Label matches used for scoring

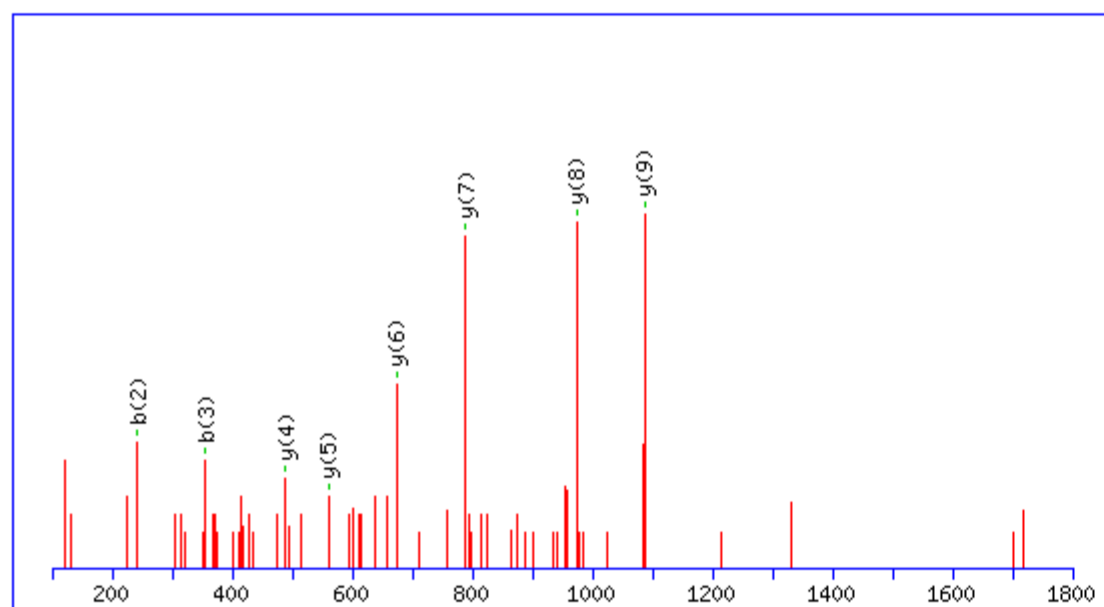

Monoisotopic mass of neutral peptide Mr(calc): 1327.688431

Fixed modifications: Propionamide (C) (apply to specified residues or termini only)

Ions Score: 46 Expect: 8.3e-005

Matches : 8/108 fragment ions using 11 most intense peaks ([help](#))

| #  | b                 | b <sup>++</sup> | b <sup>*</sup> | b <sup>*++</sup> | b <sup>0</sup> | b <sup>0++</sup> | Seq. | y                  | y <sup>++</sup> | y <sup>*</sup> | y <sup>*++</sup> | y <sup>0</sup> | y <sup>0++</sup> | #  |
|----|-------------------|-----------------|----------------|------------------|----------------|------------------|------|--------------------|-----------------|----------------|------------------|----------------|------------------|----|
| 1  | 114.091340        | 57.549308       |                |                  |                |                  | L    |                    |                 |                |                  |                |                  | 11 |
| 2  | <b>242.149918</b> | 121.578597      | 225.123369     | 113.065323       |                |                  | Q    | 1215.611663        | 608.309470      | 1198.585114    | 599.796195       | 1197.601098    | 599.304187       | 10 |
| 3  | <b>355.233982</b> | 178.120629      | 338.207433     | 169.607355       |                |                  | L    | <b>1087.553085</b> | 544.280181      | 1070.526536    | 535.766906       | 1069.542520    | 535.274898       | 9  |
| 4  | 541.313295        | 271.160286      | 524.286746     | 262.647011       |                |                  | W    | <b>974.469021</b>  | 487.738149      | 957.442472     | 479.224874       | 956.458456     | 478.732866       | 8  |
| 5  | 656.340238        | 328.673757      | 639.313689     | 320.160483       | 638.329673     | 319.668475       | D    | <b>788.389708</b>  | 394.698492      | 771.363159     | 386.185217       | 770.379143     | 385.693209       | 7  |
| 6  | 769.424302        | 385.215789      | 752.397753     | 376.702515       | 751.413737     | 376.210507       | I    | <b>673.362765</b>  | 337.185021      | 656.336216     | 328.671746       | 655.352200     | 328.179738       | 6  |
| 7  | 840.461416        | 420.734346      | 823.434867     | 412.221072       | 822.450851     | 411.729064       | A    | <b>560.278701</b>  | 280.642989      | 543.252152     | 272.129714       | 542.268136     | 271.637706       | 5  |
| 8  | 897.482880        | 449.245078      | 880.456331     | 440.731804       | 879.472315     | 440.239796       | G    | <b>489.241587</b>  | 245.124431      | 472.215038     | 236.611157       | 471.231022     | 236.119149       | 4  |
| 9  | 1025.541458       | 513.274367      | 1008.514909    | 504.761093       | 1007.530893    | 504.269085       | Q    | 432.220123         | 216.613699      | 415.193574     | 208.100425       | 414.209558     | 207.608417       | 3  |
| 10 | 1154.584051       | 577.795664      | 1137.557502    | 569.282389       | 1136.573486    | 568.790381       | E    | 304.161545         | 152.584410      | 287.134996     | 144.071136       | 286.150980     | 143.579128       | 2  |
| 11 |                   |                 |                |                  |                |                  | R    | 175.118952         | 88.063114       | 158.092403     | 79.549839        |                |                  | 1  |

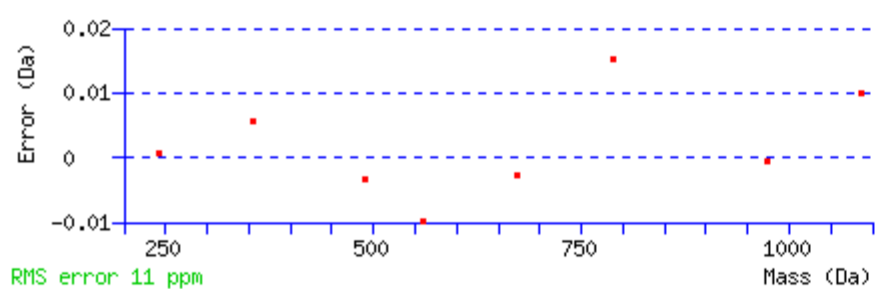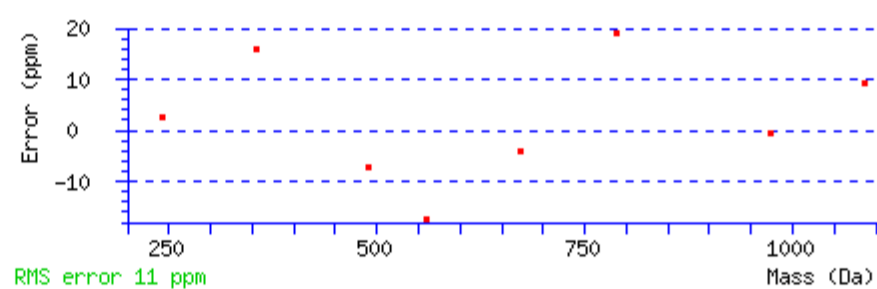

### NCBI BLAST search of LQLWDIAGQER

(Parameters: blastp, nr protein database, expect=20000, no filter, PAM30)

Other BLAST [web gateways](#)

### All matches to this query

| Score | Mr(calc):   | Delta     | Sequence                        |
|-------|-------------|-----------|---------------------------------|
| 46.0  | 1327.688431 | 0.010337  | <a href="#">LQLWDIAGQER</a>     |
| 2.3   | 1327.695663 | 0.003105  | <a href="#">LGAPVGRSGGGASAR</a> |
| 1.4   | 1327.688431 | 0.010337  | <a href="#">QLPSLVNAWER</a>     |
| 0.3   | 1327.709564 | -0.010796 | <a href="#">LQQEILDVQSR</a>     |

# **MASCOT** Mascot Search Results

## Peptide View

MS/MS Fragmentation of **VIIPVKR**

Found in **PTPRA\_HUMAN**, Receptor-type tyrosine-protein phosphatase alpha OS=Homo sapiens GN=PTPRA PE=1 SV=2

Match to Query 50109: 839.560108 from(420.787330,2+) rtinseconds(2491) index(764718)

Title: Locus:1.1.1.1296.5

Data file C:\Program Files (x86)\Matrix Science\Mascot Daemon\mgf3 TFD - Epitel - R2\mascot\_daemon\_merge.mgf

Click mouse within plot area to zoom in by factor of two about that point

Or, Plot from  to  Da

Label all possible matches  Label matches used for scoring

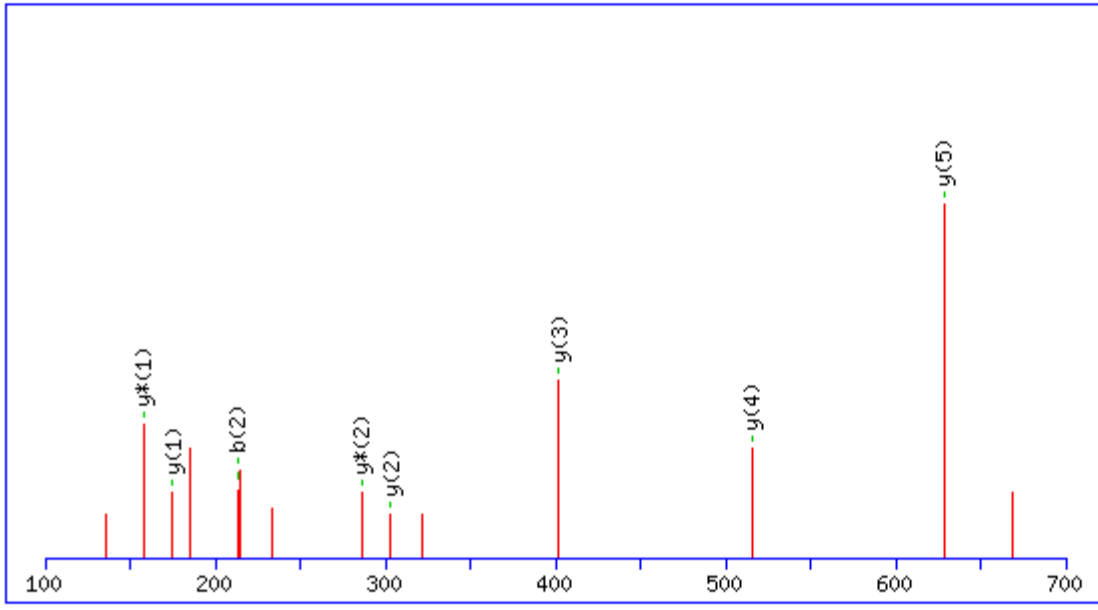

Monoisotopic mass of neutral peptide Mr(calc): 839.559265

Fixed modifications: Carbamidomethyl (C) (apply to specified residues or termini only)

Variable modifications:

P4 : Oxidation (P)

Ions Score: 38 Expect: 0.00021

Matches : 8/38 fragment ions using 12 most intense peaks [\(help\)](#)

| # | b          | b <sup>++</sup> | b <sup>*</sup> | b <sup>*++</sup> | Seq. | y          | y <sup>++</sup> | y <sup>*</sup> | y <sup>*++</sup> | # |
|---|------------|-----------------|----------------|------------------|------|------------|-----------------|----------------|------------------|---|
| 1 | 100.075690 | 50.541483       |                |                  | V    |            |                 |                |                  | 7 |
| 2 | 213.159754 | 107.083515      |                |                  | I    | 741.498136 | 371.252706      | 724.471587     | 362.739432       | 6 |
| 3 | 326.243818 | 163.625547      |                |                  | I    | 628.414072 | 314.710674      | 611.387523     | 306.197400       | 5 |
| 4 | 439.291497 | 220.149386      |                |                  | P    | 515.330008 | 258.168642      | 498.303459     | 249.655368       | 4 |
| 5 | 538.359911 | 269.683594      |                |                  | V    | 402.282329 | 201.644802      | 385.255780     | 193.131528       | 3 |
| 6 | 666.454874 | 333.731075      | 649.428325     | 325.217801       | K    | 303.213915 | 152.110595      | 286.187366     | 143.597321       | 2 |
| 7 |            |                 |                |                  | R    | 175.118952 | 88.063114       | 158.092403     | 79.549839        | 1 |

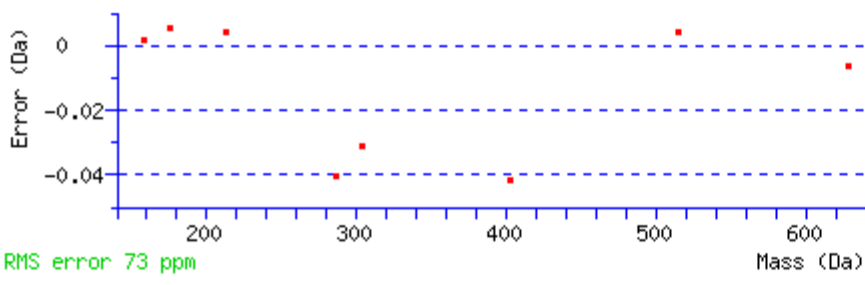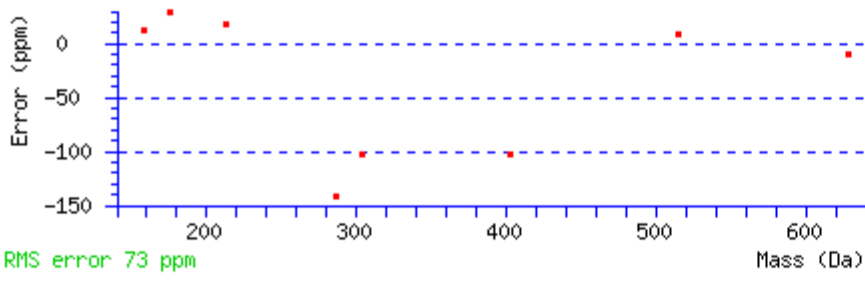

NCBI BLAST search of [VIIPVKR](#)

(Parameters: blastp, nr protein database, expect=20000, no filter, PAM30)

Other BLAST [web gateways](#)

## All matches to this query

| Score | Mr(calc):  | Delta    | Sequence                 |
|-------|------------|----------|--------------------------|
| 37.7  | 839.559265 | 0.000843 | <a href="#">VIIPVKR</a>  |
| 24.1  | 839.559265 | 0.000843 | <a href="#">VLPVIKR</a>  |
| 22.2  | 839.559265 | 0.000843 | <a href="#">VLLGAVR</a>  |
| 13.2  | 839.559265 | 0.000843 | <a href="#">IVVLLQR</a>  |
| 9.8   | 839.559265 | 0.000843 | <a href="#">LPVLKVR</a>  |
| 2.7   | 839.559265 | 0.000843 | <a href="#">LVQLLVR</a>  |
| 2.4   | 839.559265 | 0.000843 | <a href="#">VIVGALLR</a> |
| 2.1   | 839.559265 | 0.000843 | <a href="#">IVGLGLLR</a> |

# MASCOT Search Results

## Peptide View

MS/MS Fragmentation of **NELAETLALLK**

Found in **RSF1\_HUMAN**, Remodeling and spacing factor 1 OS=Homo sapiens GN=RSF1 PE=1 SV=2

Match to Query 29461: 1213.694142 from(405.571990,3+) rtinseconds(1985) index(21664)

Title: Locus:1.1.1.2185.5

Data file 2011-11-10 - TFD - EP 3-1.mgf

Click mouse within plot area to zoom in by factor of two about that point

Or, Plot from  to  Da

Label all possible matches  Label matches used for scoring

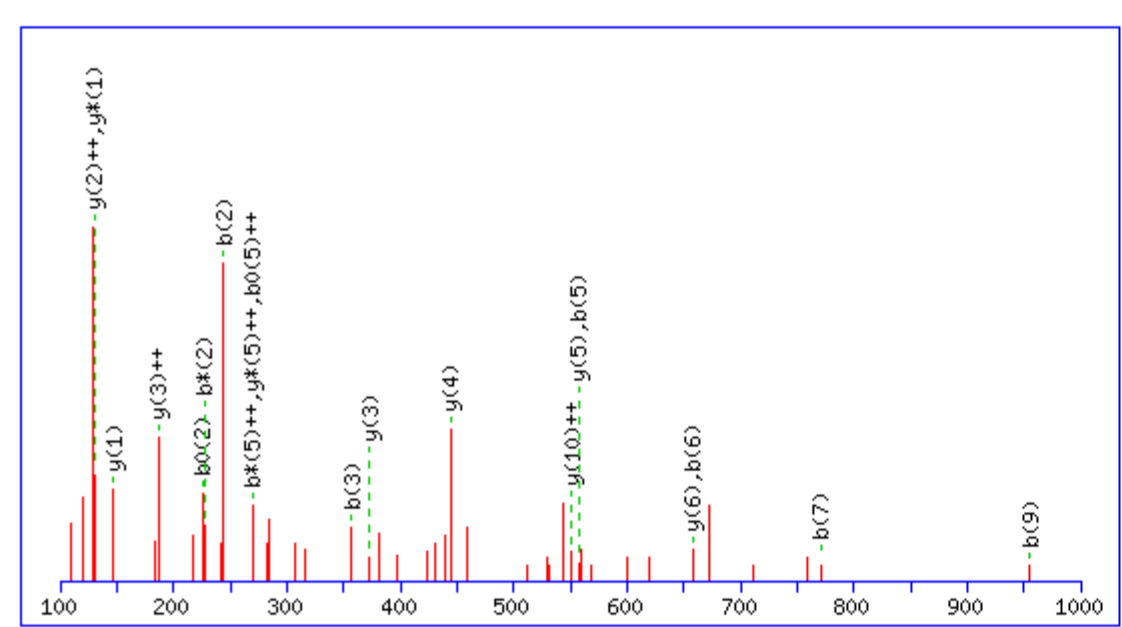

Monoisotopic mass of neutral peptide Mr(calc): 1213.691757

Fixed modifications: Propionamide (C) (apply to specified residues or termini only)

Ions Score: 30 Expect: 0.0068

Matches : 20/108 fragment ions using 36 most intense peaks [\(help\)](#)

| #  | b                 | b <sup>++</sup> | b <sup>+</sup>    | b <sup>*++</sup>  | b <sup>0</sup>    | b <sup>0++</sup>  | Seq. | y                 | y <sup>++</sup>   | y <sup>+</sup>    | y <sup>*++</sup>  | y <sup>0</sup> | y <sup>0++</sup> | #  |
|----|-------------------|-----------------|-------------------|-------------------|-------------------|-------------------|------|-------------------|-------------------|-------------------|-------------------|----------------|------------------|----|
| 1  | 115.050203        | 58.028740       | 98.023654         | 49.515465         |                   |                   | N    |                   |                   |                   |                   |                |                  | 11 |
| 2  | <b>244.092796</b> | 122.550036      | <b>227.066247</b> | 114.036762        | <b>226.082231</b> | 113.544754        | E    | 1100.656153       | <b>550.831715</b> | 1083.629604       | 542.318440        | 1082.645588    | 541.826432       | 10 |
| 3  | <b>357.176860</b> | 179.092068      | 340.150311        | 170.578794        | 339.166295        | 170.086786        | L    | 971.613560        | 486.310418        | 954.587011        | 477.797144        | 953.602995     | 477.305136       | 9  |
| 4  | 428.213974        | 214.610625      | 411.187425        | 206.097351        | 410.203409        | 205.605343        | A    | 858.529496        | 429.768386        | 841.502947        | 421.255112        | 840.518931     | 420.763104       | 8  |
| 5  | <b>557.256567</b> | 279.131922      | 540.230018        | <b>270.618647</b> | 539.246002        | <b>270.126639</b> | E    | 787.492382        | 394.249829        | 770.465833        | 385.736555        | 769.481817     | 385.244547       | 7  |
| 6  | <b>658.304246</b> | 329.655761      | 641.277697        | 321.142487        | 640.293681        | 320.650479        | T    | <b>658.449789</b> | 329.728533        | 641.423240        | 321.215258        | 640.439224     | 320.723250       | 6  |
| 7  | <b>771.388310</b> | 386.197793      | 754.361761        | 377.684519        | 753.377745        | 377.192511        | L    | <b>557.402110</b> | 279.204693        | 540.375561        | <b>270.691419</b> |                |                  | 5  |
| 8  | 842.425424        | 421.716350      | 825.398875        | 413.203076        | 824.414859        | 412.711068        | A    | <b>444.318046</b> | 222.662661        | 427.291497        | 214.149386        |                |                  | 4  |
| 9  | <b>955.509488</b> | 478.258382      | 938.482939        | 469.745108        | 937.498923        | 469.253100        | L    | <b>373.280932</b> | <b>187.144104</b> | 356.254383        | 178.630829        |                |                  | 3  |
| 10 | 1068.593552       | 534.800414      | 1051.567003       | 526.287140        | 1050.582987       | 525.795132        | L    | 260.196868        | <b>130.602072</b> | 243.170319        | 122.088797        |                |                  | 2  |
| 11 |                   |                 |                   |                   |                   |                   | K    | <b>147.112804</b> | 74.060040         | <b>130.086255</b> | 65.546765         |                |                  | 1  |

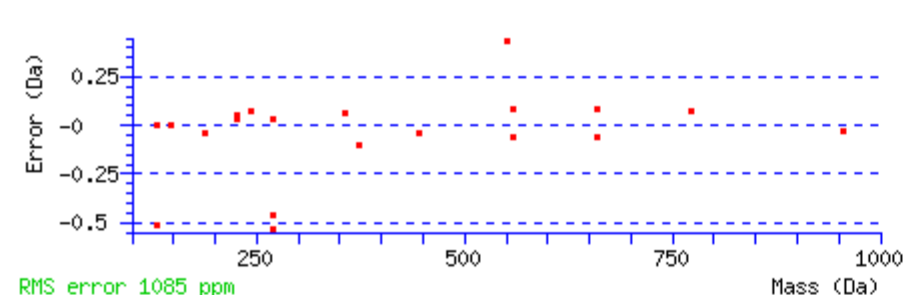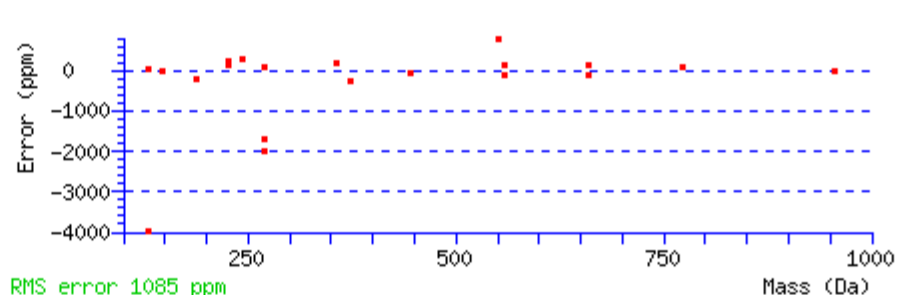

NCBI BLAST search of [NELAETLALLK](#)

(Parameters: blastp, nr protein database, expect=20000, no filter, PAM30)

Other BLAST [web gateways](#)

### All matches to this query

| Score | Mr(calc):   | Delta     | Sequence                    |
|-------|-------------|-----------|-----------------------------|
| 30.4  | 1213.691757 | 0.002385  | <a href="#">NELAETLALLK</a> |
| 29.8  | 1213.691803 | 0.002339  | <a href="#">LKTDVDVSLPK</a> |
| 14.9  | 1213.691772 | 0.002370  | <a href="#">QLDELEKVIK</a>  |
| 13.7  | 1213.691772 | 0.002370  | <a href="#">KLQEEVDLLK</a>  |
| 10.1  | 1213.691772 | 0.002370  | <a href="#">DLAGEVEKLLK</a> |
| 9.9   | 1213.691772 | 0.002370  | <a href="#">ETAEALLQVLK</a> |
| 9.7   | 1213.703018 | -0.008876 | <a href="#">KVSSQKPPALK</a> |
| 9.5   | 1213.691788 | 0.002354  | <a href="#">TLIKSEPVSPK</a> |
| 6.6   | 1213.691788 | 0.002354  | <a href="#">TLIKSEPVSPK</a> |
| 4.8   | 1213.703003 | -0.008861 | <a href="#">RTLLIDELNK</a>  |

**Peptide View**

MS/MS Fragmentation of **LSEEEILENPDFLFLTSEATDYGR**  
 Found in **RCN2\_HUMAN**, Reticulocalbin-2 OS=Homo sapiens GN=RCN2 PE=1 SV=1  
 Match to Query 51760: 2640.227862 from(881.083230,3+) rtinseconds(4009) index(60368)  
 Title: Locus:1.1.1.3040.31  
 Data file 2011-11-12 - TFD - EP 5-3.mgf

Click mouse within plot area to zoom in by factor of two about that point

Or, Plot from  to  Da

Label all possible matches  Label matches used for scoring

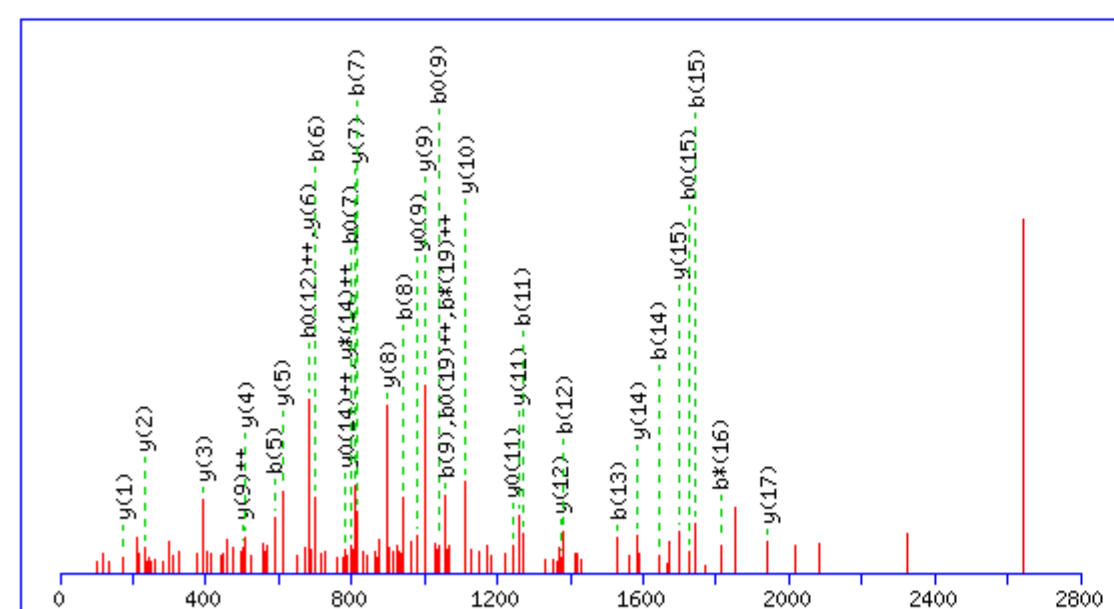

Monoisotopic mass of neutral peptide Mr(calc): 2640.244232  
 Fixed modifications: Propionamide (C) (apply to specified residues or termini only)  
 Ions Score: 93 Expect: 3.8e-009  
 Matches : 37/240 fragment ions using 57 most intense peaks ([help](#))

| #  | b                  | b <sup>++</sup> | b <sup>*</sup>     | b <sup>*++</sup>   | b <sup>0</sup>     | b <sup>0++</sup>   | Seq. | y                  | y <sup>++</sup>   | y <sup>*</sup> | y <sup>*++</sup>  | y <sup>0</sup>     | y <sup>0++</sup>  | #  |
|----|--------------------|-----------------|--------------------|--------------------|--------------------|--------------------|------|--------------------|-------------------|----------------|-------------------|--------------------|-------------------|----|
| 1  | 114.091340         | 57.549308       |                    |                    |                    |                    | L    |                    |                   |                |                   |                    |                   | 23 |
| 2  | 201.123368         | 101.065322      |                    |                    | 183.112803         | 92.060039          | S    | 2528.167485        | 1264.587380       | 2511.140936    | 1256.074106       | 2510.156920        | 1255.582098       | 22 |
| 3  | 330.165961         | 165.586618      |                    |                    | 312.155396         | 156.581336         | E    | 2441.135457        | 1221.071366       | 2424.108908    | 1212.558092       | 2423.124892        | 1212.066084       | 21 |
| 4  | 459.208554         | 230.107915      |                    |                    | 441.197989         | 221.102633         | E    | 2312.092864        | 1156.550070       | 2295.066315    | 1148.036795       | 2294.082299        | 1147.544787       | 20 |
| 5  | <b>588.251147</b>  | 294.629212      |                    |                    | 570.240582         | 285.623929         | E    | 2183.050271        | 1092.028773       | 2166.023722    | 1083.515499       | 2165.039706        | 1083.023491       | 19 |
| 6  | <b>701.335211</b>  | 351.171244      |                    |                    | 683.324646         | 342.165961         | I    | 2054.007678        | 1027.507477       | 2036.981129    | 1018.994202       | 2035.997113        | 1018.502194       | 18 |
| 7  | <b>814.419275</b>  | 407.713276      |                    |                    | <b>796.408710</b>  | 398.707993         | L    | <b>1940.923614</b> | 970.965445        | 1923.897065    | 962.452170        | 1922.913049        | 961.960162        | 17 |
| 8  | <b>943.461868</b>  | 472.234572      |                    |                    | 925.451303         | 463.229290         | E    | 1827.839550        | 914.423413        | 1810.813001    | 905.910139        | 1809.828985        | 905.418130        | 16 |
| 9  | <b>1057.504795</b> | 529.256036      | 1040.478246        | 520.742761         | <b>1039.494230</b> | 520.250753         | N    | <b>1698.796957</b> | 849.902116        | 1681.770408    | 841.388842        | 1680.786392        | 840.896834        | 15 |
| 10 | 1154.557559        | 577.782418      | 1137.531010        | 569.269143         | 1136.546994        | 568.777135         | P    | <b>1584.754030</b> | 792.880653        | 1567.727481    | <b>784.367378</b> | 1566.743465        | <b>783.875370</b> | 14 |
| 11 | <b>1269.584502</b> | 635.295889      | 1252.557953        | 626.782615         | 1251.573937        | 626.290607         | D    | 1487.701266        | 744.354271        | 1470.674717    | 735.840996        | 1469.690701        | 735.348988        | 13 |
| 12 | <b>1382.668566</b> | 691.837921      | 1365.642017        | 683.324647         | 1364.658001        | <b>682.832639</b>  | L    | <b>1372.674323</b> | 686.840799        | 1355.647774    | 678.327525        | 1354.663758        | 677.835517        | 12 |
| 13 | <b>1529.736980</b> | 765.372128      | 1512.710431        | 756.858854         | 1511.726415        | 756.366846         | F    | <b>1259.590259</b> | 630.298767        | 1242.563710    | 621.785493        | <b>1241.579694</b> | 621.293485        | 11 |
| 14 | <b>1642.821044</b> | 821.914160      | 1625.794495        | 813.400886         | 1624.810479        | 812.908878         | L    | <b>1112.521845</b> | 556.764560        | 1095.495296    | 548.251286        | 1094.511280        | 547.759278        | 10 |
| 15 | <b>1743.868723</b> | 872.438000      | 1726.842174        | 863.924725         | <b>1725.858158</b> | 863.432717         | T    | <b>999.437781</b>  | <b>500.222528</b> | 982.411232     | 491.709254        | <b>981.427216</b>  | 491.217246        | 9  |
| 16 | 1830.900751        | 915.954014      | <b>1813.874202</b> | 907.440739         | 1812.890186        | 906.948731         | S    | <b>898.390102</b>  | 449.698689        | 881.363553     | 441.185414        | 880.379537         | 440.693406        | 8  |
| 17 | 1959.943344        | 980.475310      | 1942.916795        | 971.962036         | 1941.932779        | 971.470028         | E    | <b>811.358074</b>  | 406.182675        | 794.331525     | 397.669400        | 793.347509         | 397.177392        | 7  |
| 18 | 2030.980458        | 1015.993867     | 2013.953909        | 1007.480593        | 2012.969893        | 1006.988585        | A    | <b>682.315481</b>  | 341.661378        | 665.288932     | 333.148104        | 664.304916         | 332.656096        | 6  |
| 19 | 2132.028137        | 1066.517706     | 2115.001588        | <b>1058.004432</b> | 2114.017572        | <b>1057.512424</b> | T    | <b>611.278367</b>  | 306.142821        | 594.251818     | 297.629547        | 593.267802         | 297.137539        | 5  |
| 20 | 2247.055080        | 1124.031178     | 2230.028531        | 1115.517903        | 2229.044515        | 1115.025895        | D    | <b>510.230688</b>  | 255.618982        | 493.204139     | 247.105707        | 492.220123         | 246.613699        | 4  |
| 21 | 2410.118409        | 1205.562842     | 2393.091860        | 1197.049568        | 2392.107844        | 1196.557560        | Y    | <b>395.203745</b>  | 198.105510        | 378.177196     | 189.592236        |                    |                   | 3  |
| 22 | 2467.139873        | 1234.073574     | 2450.113324        | 1225.560300        | 2449.129308        | 1225.068292        | G    | <b>232.140416</b>  | 116.573846        | 215.113867     | 108.060571        |                    |                   | 2  |
| 23 |                    |                 |                    |                    |                    |                    | R    | <b>175.118952</b>  | 88.063114         | 158.092403     | 79.549839         |                    |                   | 1  |

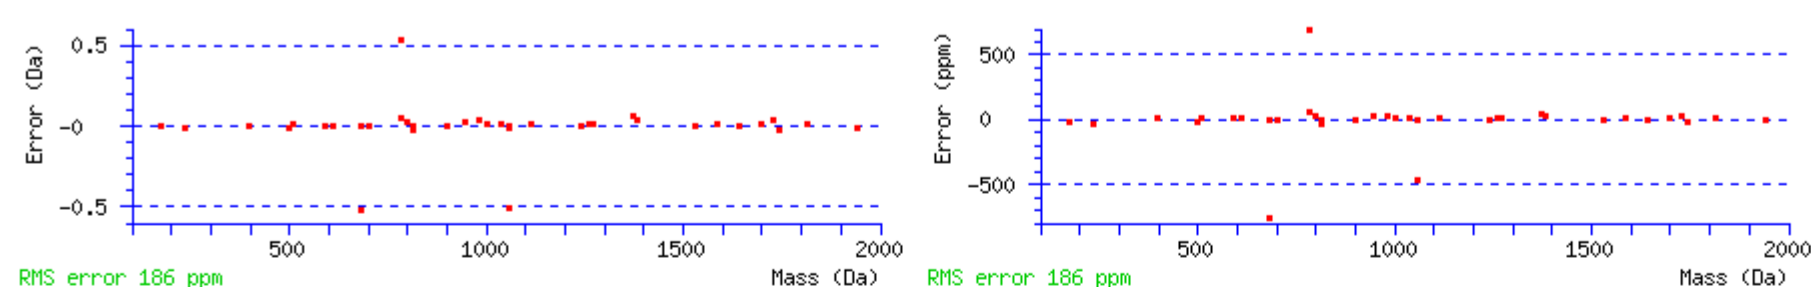

NCBI BLAST search of **LSEEEILENPDFLFLTSEATDYGR**  
 (Parameters: blastp, nr protein database, expect=20000, no filter, PAM30)  
 Other BLAST [web gateways](#)

**All matches to this query**

| Score | Mr(calc):   | Delta     | Sequence                                       |
|-------|-------------|-----------|------------------------------------------------|
| 93.1  | 2640.244232 | -0.016370 | <a href="#">LSEEEILENPDFLFLTSEATDYGR</a>       |
| 3.1   | 2640.227859 | 0.000003  | <a href="#">ELCPPDPAFAPLSSWPGSGPAGGSTR</a>     |
| 3.1   | 2640.227859 | 0.000003  | <a href="#">ELCPPDPAFAPLSSWPGSGPAGGSTR</a>     |
| 3.1   | 2640.227859 | 0.000003  | <a href="#">ELCPPDPAFAPLSSWPGSGPAGGSTR</a>     |
| 0.8   | 2640.252884 | -0.025022 | <a href="#">GEGGPPGVAGPPGGSGPAGPPGPQGVKGER</a> |
| 0.2   | 2640.209244 | 0.018618  | <a href="#">TFGPPPSLSPGAFSYSSSRFSSSR</a>       |

**Peptide View**

MS/MS Fragmentation of **TQIDHYVGIAR**

Found in **RTN3\_HUMAN**, Reticulon-3 OS=Homo sapiens GN=RTN3 PE=1 SV=2

Match to Query 35188: 1271.665272 from(424.895700,3+) rtinseconds(1883) index(19068)

Title: Locus:1.1.1.2039.5

Data file 2011-11-14 - TFD - EP 8-5.mgf

Click mouse within plot area to zoom in by factor of two about that point

Or, Plot from  to  Da

Label all possible matches  Label matches used for scoring

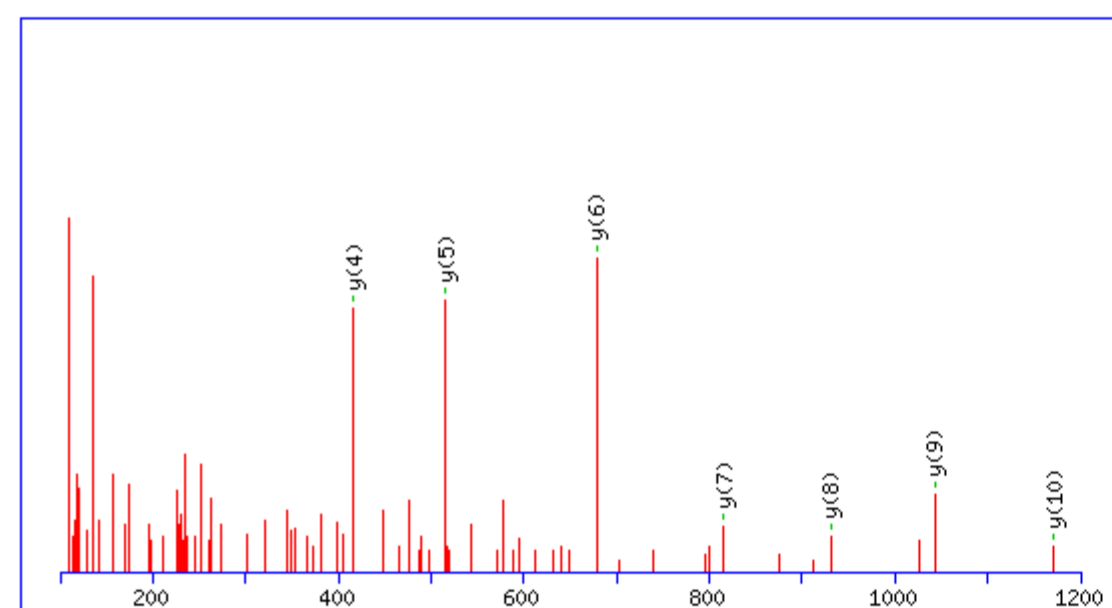

Monoisotopic mass of neutral peptide Mr(calc): 1271.662231

Fixed modifications: Propionamide (C) (apply to specified residues or termini only)

Ions Score: 52 Expect: 4.1e-005

Matches : 7/104 fragment ions using 11 most intense peaks ([help](#))

| #  | b           | b <sup>++</sup> | b*          | b <sup>+++</sup> | b <sup>0</sup> | b <sup>0++</sup> | Seq. | y                  | y <sup>++</sup> | y*          | y <sup>+++</sup> | y <sup>0</sup> | y <sup>0++</sup> | #  |
|----|-------------|-----------------|-------------|------------------|----------------|------------------|------|--------------------|-----------------|-------------|------------------|----------------|------------------|----|
| 1  | 102.054955  | 51.531116       |             |                  | 84.044390      | 42.525833        | T    |                    |                 |             |                  |                |                  | 11 |
| 2  | 230.113533  | 115.560405      | 213.086984  | 107.047130       | 212.102968     | 106.555122       | Q    | <b>1171.621834</b> | 586.314555      | 1154.595285 | 577.801281       | 1153.611269    | 577.309273       | 10 |
| 3  | 343.197597  | 172.102437      | 326.171048  | 163.589162       | 325.187032     | 163.097154       | I    | <b>1043.563256</b> | 522.285266      | 1026.536707 | 513.771992       | 1025.552691    | 513.279984       | 9  |
| 4  | 458.224540  | 229.615908      | 441.197991  | 221.102634       | 440.213975     | 220.610626       | D    | <b>930.479192</b>  | 465.743234      | 913.452643  | 457.229960       | 912.468627     | 456.737952       | 8  |
| 5  | 595.283452  | 298.145364      | 578.256903  | 289.632090       | 577.272887     | 289.140082       | H    | <b>815.452249</b>  | 408.229762      | 798.425700  | 399.716488       |                |                  | 7  |
| 6  | 758.346781  | 379.677029      | 741.320232  | 371.163754       | 740.336216     | 370.671746       | Y    | <b>678.393337</b>  | 339.700307      | 661.366788  | 331.187032       |                |                  | 6  |
| 7  | 857.415195  | 429.211236      | 840.388646  | 420.697961       | 839.404630     | 420.205953       | V    | <b>515.330008</b>  | 258.168642      | 498.303459  | 249.655367       |                |                  | 5  |
| 8  | 914.436659  | 457.721968      | 897.410110  | 449.208693       | 896.426094     | 448.716685       | G    | <b>416.261594</b>  | 208.634435      | 399.235045  | 200.121160       |                |                  | 4  |
| 9  | 1027.520723 | 514.264000      | 1010.494174 | 505.750725       | 1009.510158    | 505.258717       | I    | 359.240130         | 180.123703      | 342.213581  | 171.610428       |                |                  | 3  |
| 10 | 1098.557837 | 549.782557      | 1081.531288 | 541.269282       | 1080.547272    | 540.777274       | A    | 246.156066         | 123.581671      | 229.129517  | 115.068396       |                |                  | 2  |
| 11 |             |                 |             |                  |                |                  | R    | 175.118952         | 88.063114       | 158.092403  | 79.549839        |                |                  | 1  |

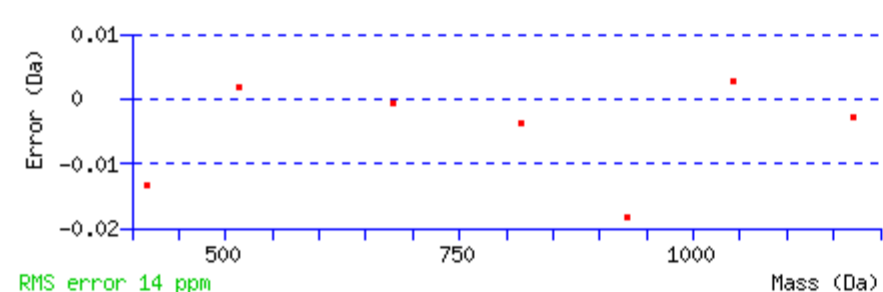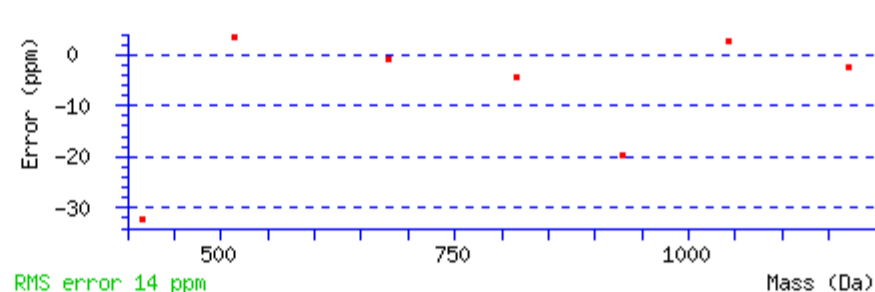

NCBI BLAST search of [TQIDHYVGIAR](#)

(Parameters: blastp, nr protein database, expect=20000, no filter, PAM30)

Other BLAST [web gateways](#)

**All matches to this query**

| Score | Mr(calc):   | Delta     | Sequence                      |
|-------|-------------|-----------|-------------------------------|
| 51.7  | 1271.662231 | 0.003041  | <a href="#">TQIDHYVGIAR</a>   |
| 4.8   | 1271.672119 | -0.006847 | <a href="#">TQEQSDVKLPK</a>   |
| 4.4   | 1271.672119 | -0.006847 | <a href="#">QTSPLGSSLPAAK</a> |
| 4.0   | 1271.673462 | -0.008190 | <a href="#">IEVQPKPHHR</a>    |
| 1.9   | 1271.665604 | -0.000332 | <a href="#">TEVQVMGGARPK</a>  |



# MASCOT Search Results

## Peptide View

MS/MS Fragmentation of **SLTALSEPR**

Found in **RAII\_HUMAN**, Retinoic acid-induced protein 1 OS=Homo sapiens GN=RAI1 PE=1 SV=2

Match to Query 12189: 988.524548 from(495.269550,2+) rtinseconds(1185) index(7476)

Title: Locus:1.1.1.1864.21

Data file 2011-11-10 - TFD - EP 3-3.mgf

Click mouse within plot area to zoom in by factor of two about that point

Or, Plot from  to  Da

Label all possible matches  Label matches used for scoring

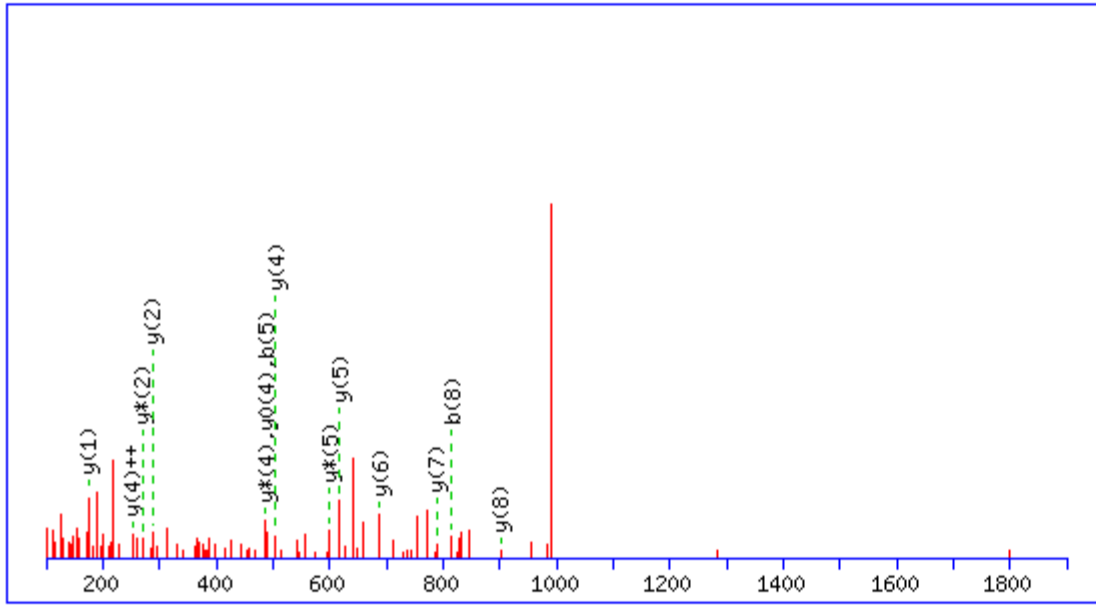

Monoisotopic mass of neutral peptide **Mr(calc): 988.518906**

Fixed modifications: Propionamide (C) (apply to specified residues or termini only)

Variable modifications:

P8 : Oxidation (P)

Ions Score: 34 Expect: 0.0065

Matches : 14/76 fragment ions using 35 most intense peaks ([help](#))

| # | b                 | b <sup>++</sup> | b <sup>0</sup> | b <sup>0++</sup> | Seq. | y                 | y <sup>++</sup>   | y <sup>*</sup>    | y <sup>++*</sup> | y <sup>0</sup>    | y <sup>0++</sup> | # |
|---|-------------------|-----------------|----------------|------------------|------|-------------------|-------------------|-------------------|------------------|-------------------|------------------|---|
| 1 | 88.039304         | 44.523290       | 70.028739      | 35.518008        | S    |                   |                   |                   |                  |                   |                  | 9 |
| 2 | 201.123368        | 101.065322      | 183.112803     | 92.060039        | L    | <b>902.494173</b> | 451.750725        | 885.467624        | 443.237450       | 884.483608        | 442.745442       | 8 |
| 3 | 302.171047        | 151.589161      | 284.160482     | 142.583879       | T    | <b>789.410109</b> | 395.208693        | 772.383560        | 386.695418       | 771.399544        | 386.203410       | 7 |
| 4 | 373.208161        | 187.107718      | 355.197596     | 178.102436       | A    | <b>688.362430</b> | 344.684853        | 671.335881        | 336.171579       | 670.351865        | 335.679571       | 6 |
| 5 | <b>486.292225</b> | 243.649750      | 468.281660     | 234.644468       | L    | <b>617.325316</b> | 309.166296        | <b>600.298767</b> | 300.653022       | 599.314751        | 300.161014       | 5 |
| 6 | 573.324253        | 287.165765      | 555.313688     | 278.160482       | S    | <b>504.241252</b> | <b>252.624264</b> | <b>487.214703</b> | 244.110990       | <b>486.230687</b> | 243.618982       | 4 |
| 7 | 702.366846        | 351.687061      | 684.356281     | 342.681779       | E    | 417.209224        | 209.108250        | 400.182675        | 200.594976       | 399.198659        | 200.102968       | 3 |
| 8 | <b>815.414525</b> | 408.210901      | 797.403960     | 399.205618       | P    | <b>288.166631</b> | 144.586954        | <b>271.140082</b> | 136.073679       |                   |                  | 2 |
| 9 |                   |                 |                |                  | R    | <b>175.118952</b> | 88.063114         | 158.092403        | 79.549840        |                   |                  | 1 |

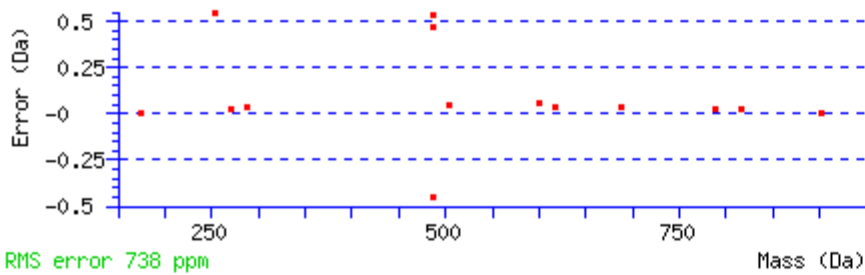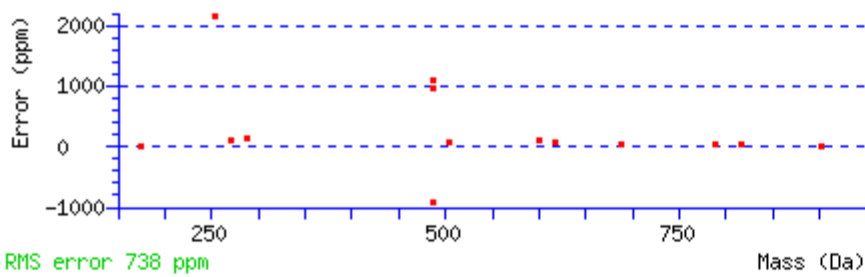

NCBI BLAST search of **SLTALSEPR**

(Parameters: blastp, nr protein database, expect=20000, no filter, PAM30)

Other BLAST [web gateways](#)

## All matches to this query

| Score | Mr(calc):  | Delta     | Sequence                  |
|-------|------------|-----------|---------------------------|
| 33.6  | 988.518906 | 0.005642  | <a href="#">SLTALSEPR</a> |
| 25.5  | 988.530121 | -0.005573 | <a href="#">SEISELRR</a>  |
| 17.2  | 988.518936 | 0.005612  | <a href="#">SPSTIDVVR</a> |
| 15.0  | 988.530136 | -0.005588 | <a href="#">SEVTELRR</a>  |
| 10.2  | 988.523605 | 0.000943  | <a href="#">RAGAACTLR</a> |
| 9.3   | 988.518936 | 0.005612  | <a href="#">TSTVPPSLR</a> |
| 9.0   | 988.530136 | -0.005588 | <a href="#">DRTLESLR</a>  |
| 4.8   | 988.534180 | -0.009632 | <a href="#">SPFLPGSIR</a> |
| 4.8   | 988.534149 | -0.009601 | <a href="#">YREPPALK</a>  |
| 4.2   | 988.518921 | 0.005627  | <a href="#">TSITQPSK</a>  |

# Mascot Search Results

## Peptide View

MS/MS Fragmentation of **VVVVTGANTGIGK**

Found in **RDH11\_HUMAN**, Retinol dehydrogenase 11 OS=Homo sapiens GN=RDH11 PE=1 SV=2

Match to Query 31272: 1213.705068 from(607.859810,2+) rtinseconds(1758) index(16436)

Title: Locus:1.1.1.1985.42

Data file 2011-11-10 - TFD - EP 4-5.mgf

Click mouse within plot area to zoom in by factor of two about that point

Or, Plot from  to  Da

Label all possible matches  Label matches used for scoring

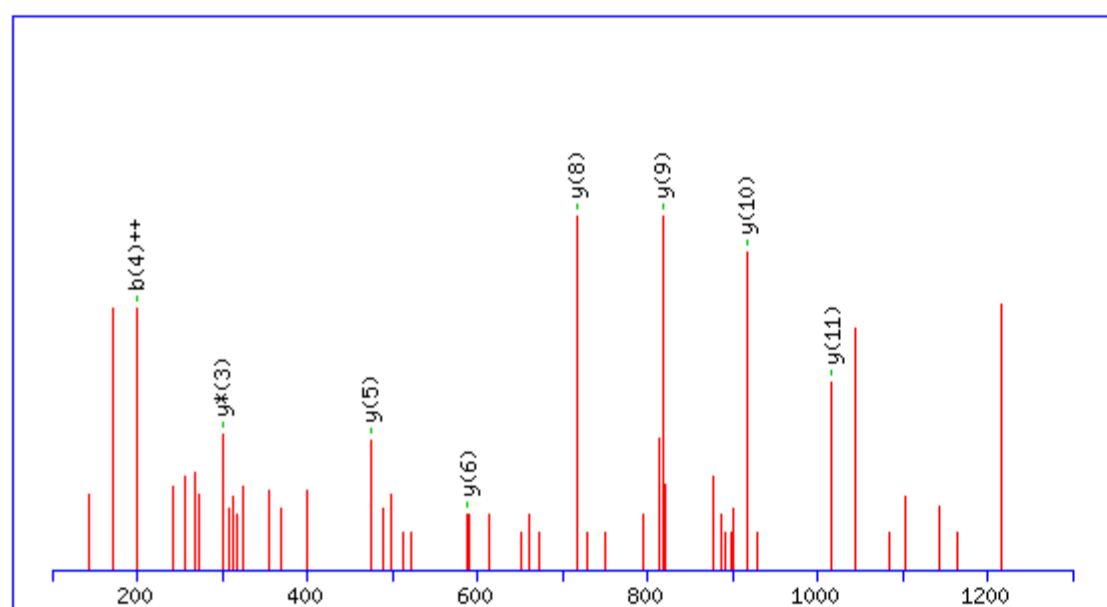

Monoisotopic mass of neutral peptide Mr(calc): 1213.703064

Fixed modifications: Propionamide (C) (apply to specified residues or termini only)

Ions Score: 41 Expect: 0.00042

Matches : 9/114 fragment ions using 11 most intense peaks ([help](#))

| #  | b           | b <sup>++</sup> | b <sup>*</sup> | b <sup>*++</sup> | b <sup>0</sup> | b <sup>0++</sup> | Seq. | y           | y <sup>++</sup> | y <sup>*</sup> | y <sup>*++</sup> | y <sup>0</sup> | y <sup>0++</sup> | #  |
|----|-------------|-----------------|----------------|------------------|----------------|------------------|------|-------------|-----------------|----------------|------------------|----------------|------------------|----|
| 1  | 100.075690  | 50.541483       |                |                  |                |                  | V    |             |                 |                |                  |                |                  | 13 |
| 2  | 199.144104  | 100.075690      |                |                  |                |                  | V    | 1115.641901 | 558.324589      | 1098.615352    | 549.811314       | 1097.631336    | 549.319306       | 12 |
| 3  | 298.212518  | 149.609897      |                |                  |                |                  | V    | 1016.573487 | 508.790382      | 999.546938     | 500.277107       | 998.562922     | 499.785099       | 11 |
| 4  | 397.280932  | 199.144104      |                |                  |                |                  | V    | 917.505073  | 459.256175      | 900.478524     | 450.742900       | 899.494508     | 450.250892       | 10 |
| 5  | 498.328611  | 249.667944      |                |                  | 480.318046     | 240.662661       | T    | 818.436659  | 409.721968      | 801.410110     | 401.208693       | 800.426094     | 400.716685       | 9  |
| 6  | 555.350075  | 278.178676      |                |                  | 537.339510     | 269.173393       | G    | 717.388980  | 359.198128      | 700.362431     | 350.684853       | 699.378415     | 350.192845       | 8  |
| 7  | 626.387189  | 313.697233      |                |                  | 608.376624     | 304.691950       | A    | 660.367516  | 330.687396      | 643.340967     | 322.174122       | 642.356951     | 321.682114       | 7  |
| 8  | 740.430116  | 370.718696      | 723.403567     | 362.205422       | 722.419551     | 361.713414       | N    | 589.330402  | 295.168839      | 572.303853     | 286.655565       | 571.319837     | 286.163557       | 6  |
| 9  | 841.477795  | 421.242536      | 824.451246     | 412.729261       | 823.467230     | 412.237253       | T    | 475.287475  | 238.147375      | 458.260926     | 229.634101       | 457.276910     | 229.142093       | 5  |
| 10 | 898.499259  | 449.753268      | 881.472710     | 441.239993       | 880.488694     | 440.747985       | G    | 374.239796  | 187.623536      | 357.213247     | 179.110261       |                |                  | 4  |
| 11 | 1011.583323 | 506.295300      | 994.556774     | 497.782025       | 993.572758     | 497.290017       | I    | 317.218332  | 159.112804      | 300.191783     | 150.599529       |                |                  | 3  |
| 12 | 1068.604787 | 534.806032      | 1051.578238    | 526.292757       | 1050.594222    | 525.800749       | G    | 204.134268  | 102.570772      | 187.107719     | 94.057497        |                |                  | 2  |
| 13 |             |                 |                |                  |                |                  | K    | 147.112804  | 74.060040       | 130.086255     | 65.546765        |                |                  | 1  |

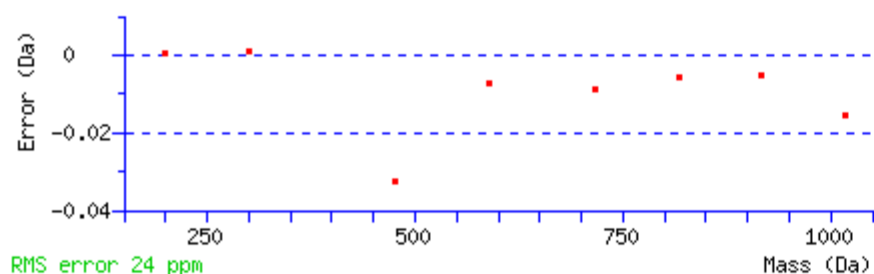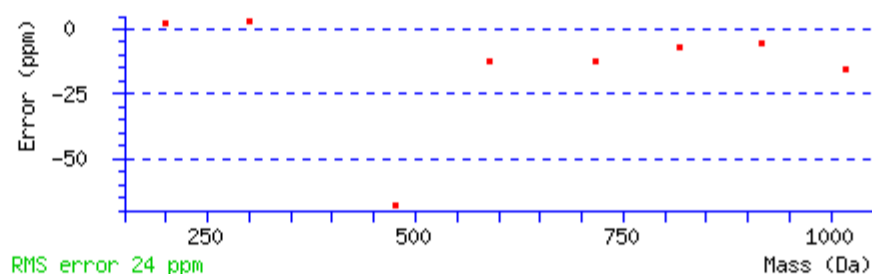

NCBI BLAST search of **VVVVTGANTGIGK**

(Parameters: blastp, nr protein database, expect=20000, no filter, PAM30)

Other BLAST [web gateways](#)

All matches to this query

| Score | Mr(calc):   | Delta    | Sequence                      |
|-------|-------------|----------|-------------------------------|
| 41.3  | 1213.703064 | 0.002004 | <a href="#">VVVVTGANTGIGK</a> |

Mascot: <http://www.matrixscience.com/>

**Peptide View**

MS/MS Fragmentation of **SPELAAQPSTYLVAEELADVSGK**

Found in **RDH13\_HUMAN**, Retinol dehydrogenase 13 OS=Homo sapiens GN=RDH13 PE=1 SV=2

Match to Query 72209: 2445.239922 from(816.087250,3+) rtinseconds(4346) index(66797)

Title: Locus:1.1.1.2941.45

Data file 2011-11-12 - TFD - EP 6-4.mgf

Click mouse within plot area to zoom in by factor of two about that point

Or, Plot from 0 to 2400 Da  Full range

Label all possible matches  Label matches used for scoring

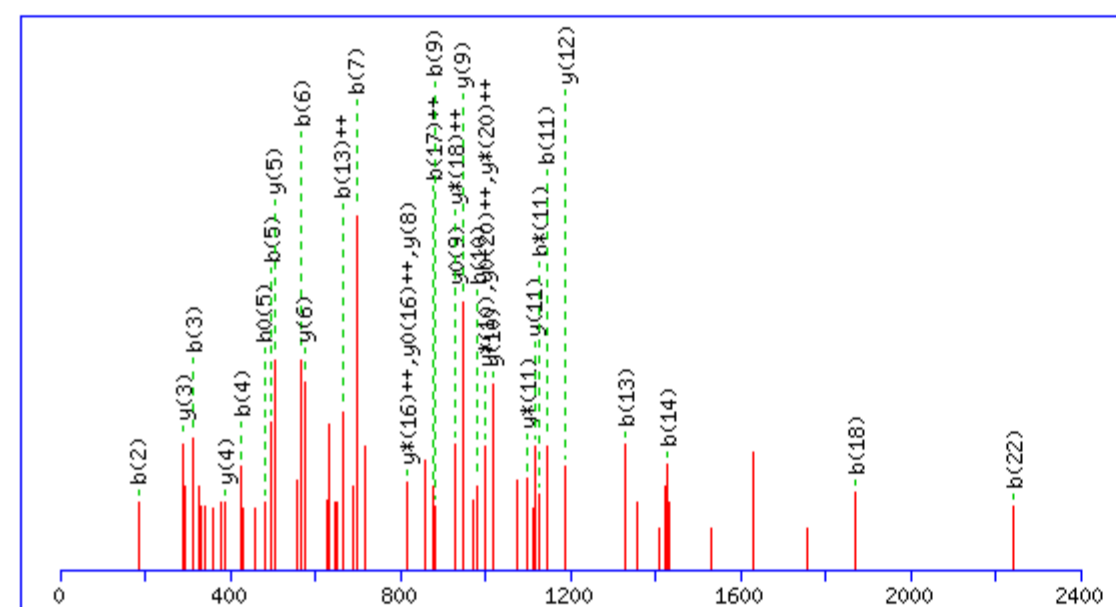

Monoisotopic mass of neutral peptide Mr(calc): 2445.227463

Fixed modifications: Propionamide (C) (apply to specified residues or termini only)

Ions Score: 97 Expect: 1.9e-009

Matches : 34/260 fragment ions using 47 most intense peaks [\(help\)](#)

| #  | b                  | b <sup>++</sup>   | b <sup>*</sup>     | b <sup>*++</sup> | b <sup>0</sup>    | b <sup>0++</sup> | Seq. | y                  | y <sup>++</sup> | y <sup>*</sup>     | y <sup>*++</sup>   | y <sup>0</sup>    | y <sup>0++</sup>   | #  |
|----|--------------------|-------------------|--------------------|------------------|-------------------|------------------|------|--------------------|-----------------|--------------------|--------------------|-------------------|--------------------|----|
| 1  | 88.039304          | 44.523290         |                    |                  | 70.028739         | 35.518008        | S    |                    |                 |                    |                    |                   |                    | 24 |
| 2  | <b>185.092068</b>  | 93.049672         |                    |                  | 167.081503        | 84.044389        | P    | 2359.202750        | 1180.105013     | 2342.176201        | 1171.591738        | 2341.192185       | 1171.099730        | 23 |
| 3  | <b>314.134661</b>  | 157.570968        |                    |                  | 296.124096        | 148.565686       | E    | 2262.149986        | 1131.578631     | 2245.123437        | 1123.065356        | 2244.139421       | 1122.573348        | 22 |
| 4  | <b>427.218725</b>  | 214.113001        |                    |                  | 409.208160        | 205.107718       | L    | 2133.107393        | 1067.057334     | 2116.080844        | 1058.544060        | 2115.096828       | 1058.052052        | 21 |
| 5  | <b>498.255839</b>  | 249.631557        |                    |                  | <b>480.245274</b> | 240.626275       | A    | 2020.023329        | 1010.515303     | 2002.996780        | <b>1002.002028</b> | 2002.012764       | <b>1001.510020</b> | 20 |
| 6  | <b>569.292953</b>  | 285.150115        |                    |                  | 551.282388        | 276.144832       | A    | 1948.986215        | 974.996745      | 1931.959666        | 966.483471         | 1930.975650       | 965.991463         | 19 |
| 7  | <b>697.351531</b>  | 349.179404        | 680.324982         | 340.666129       | 679.340966        | 340.174121       | Q    | 1877.949101        | 939.478188      | 1860.922552        | <b>930.964914</b>  | 1859.938536       | 930.472906         | 18 |
| 8  | 794.404295         | 397.705786        | 777.377746         | 389.192511       | 776.393730        | 388.700503       | P    | 1749.890523        | 875.448899      | 1732.863974        | 866.935625         | 1731.879958       | 866.443617         | 17 |
| 9  | <b>881.436323</b>  | 441.221800        | 864.409774         | 432.708525       | 863.425758        | 432.216517       | S    | 1652.837759        | 826.922517      | 1635.811210        | <b>818.409243</b>  | 1634.827194       | <b>817.917235</b>  | 16 |
| 10 | <b>982.484002</b>  | 491.745639        | 965.457453         | 483.232365       | 964.473437        | 482.740357       | T    | 1565.805731        | 783.406503      | 1548.779182        | 774.893229         | 1547.795166       | 774.401221         | 15 |
| 11 | <b>1145.547331</b> | 573.277304        | <b>1128.520782</b> | 564.764029       | 1127.536766       | 564.272021       | Y    | 1464.758052        | 732.882664      | 1447.731503        | 724.369390         | 1446.747487       | 723.877381         | 14 |
| 12 | 1258.631395        | 629.819335        | 1241.604846        | 621.306061       | 1240.620830       | 620.814053       | L    | 1301.694723        | 651.350999      | 1284.668174        | 642.837725         | 1283.684158       | 642.345717         | 13 |
| 13 | <b>1329.668509</b> | <b>665.337892</b> | 1312.641960        | 656.824618       | 1311.657944       | 656.332610       | A    | <b>1188.610659</b> | 594.808967      | 1171.584110        | 586.295693         | 1170.600094       | 585.803685         | 12 |
| 14 | <b>1428.736923</b> | 714.872099        | 1411.710374        | 706.358825       | 1410.726358       | 705.866817       | V    | <b>1117.573545</b> | 559.290411      | <b>1100.546996</b> | 550.777136         | 1099.562980       | 550.285128         | 11 |
| 15 | 1499.774037        | 750.390656        | 1482.747488        | 741.877382       | 1481.763472       | 741.385374       | A    | <b>1018.505131</b> | 509.756203      | <b>1001.478582</b> | 501.242929         | 1000.494566       | 500.750921         | 10 |
| 16 | 1628.816630        | 814.911953        | 1611.790081        | 806.398679       | 1610.806065       | 805.906671       | E    | <b>947.468017</b>  | 474.237646      | 930.441468         | 465.724372         | <b>929.457452</b> | 465.232364         | 9  |
| 17 | 1757.859223        | <b>879.433250</b> | 1740.832674        | 870.919975       | 1739.848658       | 870.427967       | E    | <b>818.425424</b>  | 409.716350      | 801.398875         | 401.203075         | 800.414859        | 400.711067         | 8  |
| 18 | <b>1870.943287</b> | 935.975282        | 1853.916738        | 927.462007       | 1852.932722       | 926.969999       | L    | 689.382831         | 345.195053      | 672.356282         | 336.681779         | 671.372266        | 336.189771         | 7  |
| 19 | 1941.980401        | 971.493839        | 1924.953852        | 962.980564       | 1923.969836       | 962.488556       | A    | <b>576.298767</b>  | 288.653021      | 559.272218         | 280.139747         | 558.288202        | 279.647739         | 6  |
| 20 | 2057.007344        | 1029.007310       | 2039.980795        | 1020.494035      | 2038.996779       | 1020.002027      | D    | <b>505.261653</b>  | 253.134464      | 488.235104         | 244.621190         | 487.251088        | 244.129182         | 5  |
| 21 | 2156.075758        | 1078.541517       | 2139.049209        | 1070.028242      | 2138.065193       | 1069.536234      | V    | <b>390.234710</b>  | 195.620993      | 373.208161         | 187.107718         | 372.224145        | 186.615710         | 4  |
| 22 | <b>2243.107786</b> | 1122.057531       | 2226.081237        | 1113.544256      | 2225.097221       | 1113.052248      | S    | <b>291.166296</b>  | 146.086786      | 274.139747         | 137.573512         | 273.155731        | 137.081504         | 3  |
| 23 | 2300.129250        | 1150.568263       | 2283.102701        | 1142.054988      | 2282.118685       | 1141.562980      | G    | 204.134268         | 102.570772      | 187.107719         | 94.057497          |                   |                    | 2  |
| 24 |                    |                   |                    |                  |                   |                  | K    | 147.112804         | 74.060040       | 130.086255         | 65.546765          |                   |                    | 1  |

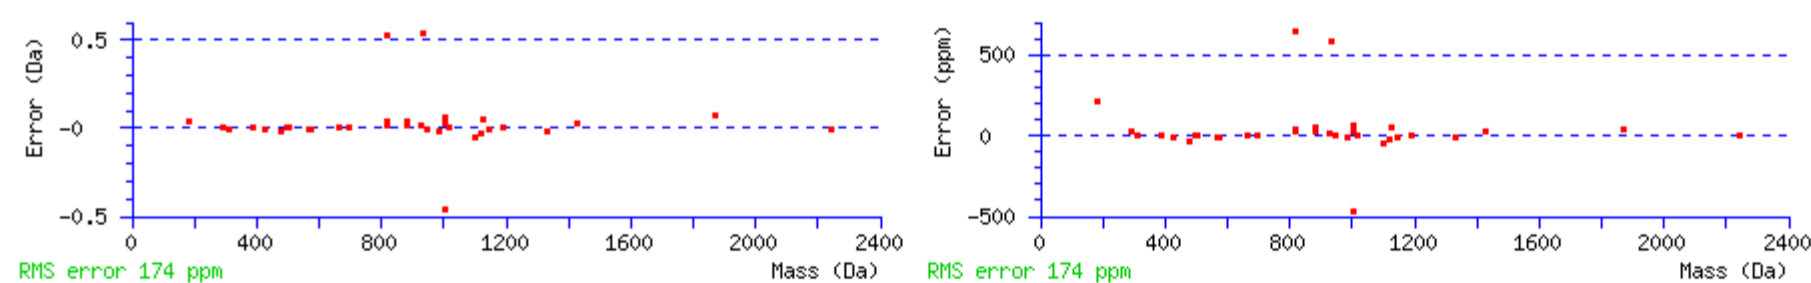

NCBI BLAST search of **SPELAAQPSTYLVAEELADVSGK**

(Parameters: blastp, nr protein database, expect=20000, no filter, PAM30)

Other BLAST [web gateways](#)

**All matches to this query**

| Score | Mr(calc):   | Delta     | Sequence                                 |
|-------|-------------|-----------|------------------------------------------|
| 96.9  | 2445.227463 | 0.012459  | <a href="#">SPELAAQPSTYLVAEELADVSGK</a>  |
| 3.8   | 2445.260742 | -0.020820 | <a href="#">MATRVEVGSITPLTAVPGLGEMGK</a> |
| 1.9   | 2445.260742 | -0.020820 | <a href="#">MATRVEVGSITPLTAVPGLGEMGK</a> |

# MASCOT Search Results

## Peptide View

MS/MS Fragmentation of **AEEYEFLTPVEEAPK**

Found in **GDRI1\_HUMAN**, Rho GDP-dissociation inhibitor 1 OS=Homo sapiens GN=ARHGDI1 PE=1 SV=3

Match to Query 65581: 1750.826168 from(876.420360,2+) rtinseconds(2976) index(41734)

Title: Locus:1.1.1.1521.47

Data file 2012-01-27 - TFD - Epitel - IEC - 10ul - 1.mgf

Click mouse within plot area to zoom in by factor of two about that point

Or, Plot from  to  Da

Label all possible matches  Label matches used for scoring

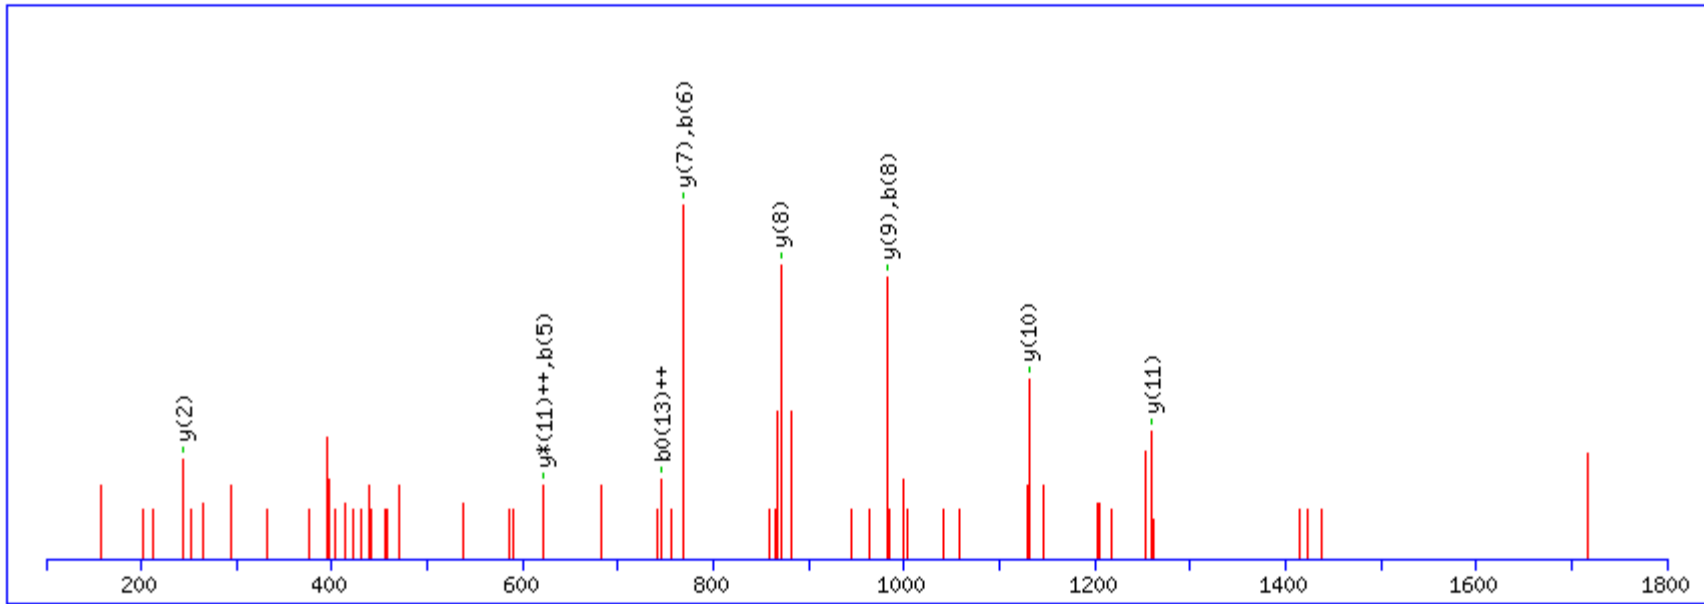

Monoisotopic mass of neutral peptide Mr(calc): 1750.830109

Fixed modifications: Carbamidomethyl (C) (apply to specified residues or termini only)

Ions Score: 37 Expect: 0.00036

Matches : 11/132 fragment ions using 14 most intense peaks [\(help\)](#)

| #  | b                 | b <sup>++</sup> | b <sup>0</sup> | b <sup>0++</sup>  | Seq. | y                  | y <sup>++</sup> | y <sup>*</sup> | y <sup>*++</sup>  | y <sup>0</sup> | y <sup>0++</sup> | #  |
|----|-------------------|-----------------|----------------|-------------------|------|--------------------|-----------------|----------------|-------------------|----------------|------------------|----|
| 1  | 72.044390         | 36.525833       |                |                   | A    |                    |                 |                |                   |                |                  | 15 |
| 2  | 201.086983        | 101.047130      | 183.076418     | 92.041847         | E    | 1680.800311        | 840.903794      | 1663.773762    | 832.390519        | 1662.789746    | 831.898511       | 14 |
| 3  | 330.129576        | 165.568426      | 312.119011     | 156.563144        | E    | 1551.757718        | 776.382497      | 1534.731169    | 767.869223        | 1533.747153    | 767.377215       | 13 |
| 4  | 493.192905        | 247.100090      | 475.182340     | 238.094808        | Y    | 1422.715125        | 711.861201      | 1405.688576    | 703.347926        | 1404.704560    | 702.855918       | 12 |
| 5  | <b>622.235498</b> | 311.621387      | 604.224933     | 302.616105        | E    | <b>1259.651796</b> | 630.329536      | 1242.625247    | <b>621.816262</b> | 1241.641231    | 621.324254       | 11 |
| 6  | <b>769.303912</b> | 385.155594      | 751.293347     | 376.150311        | F    | <b>1130.609203</b> | 565.808240      | 1113.582654    | 557.294965        | 1112.598638    | 556.802957       | 10 |
| 7  | 882.387976        | 441.697626      | 864.377411     | 432.692343        | L    | <b>983.540789</b>  | 492.274033      | 966.514240     | 483.760758        | 965.530224     | 483.268750       | 9  |
| 8  | <b>983.435655</b> | 492.221466      | 965.425090     | 483.216183        | T    | <b>870.456725</b>  | 435.732001      | 853.430176     | 427.218726        | 852.446160     | 426.726718       | 8  |
| 9  | 1080.488419       | 540.747848      | 1062.477854    | 531.742565        | P    | <b>769.409046</b>  | 385.208161      | 752.382497     | 376.694887        | 751.398481     | 376.202879       | 7  |
| 10 | 1179.556833       | 590.282055      | 1161.546268    | 581.276772        | V    | 672.356282         | 336.681779      | 655.329733     | 328.168505        | 654.345717     | 327.676497       | 6  |
| 11 | 1308.599426       | 654.803351      | 1290.588861    | 645.798069        | E    | 573.287868         | 287.147572      | 556.261319     | 278.634298        | 555.277303     | 278.142290       | 5  |
| 12 | 1437.642019       | 719.324648      | 1419.631454    | 710.319365        | E    | 444.245275         | 222.626276      | 427.218726     | 214.113001        | 426.234710     | 213.620993       | 4  |
| 13 | 1508.679133       | 754.843205      | 1490.668568    | <b>745.837922</b> | A    | 315.202682         | 158.104979      | 298.176133     | 149.591704        |                |                  | 3  |
| 14 | 1605.731897       | 803.369587      | 1587.721332    | 794.364304        | P    | <b>244.165568</b>  | 122.586422      | 227.139019     | 114.073148        |                |                  | 2  |
| 15 |                   |                 |                |                   | K    | 147.112804         | 74.060040       | 130.086255     | 65.546765         |                |                  | 1  |

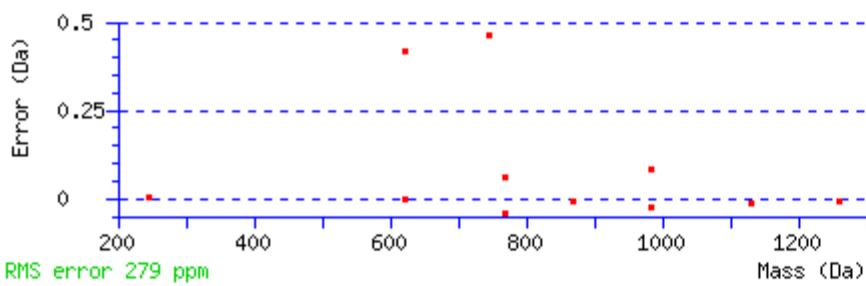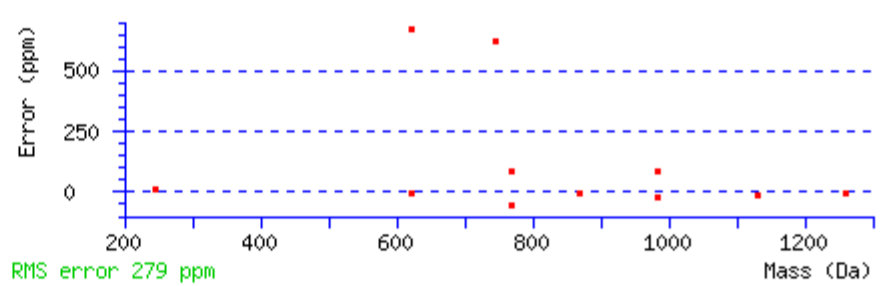

NCBI BLAST search of [AEEYEFLTPVEEAPK](#)

(Parameters: blastp, nr protein database, expect=20000, no filter, PAM30)

Other BLAST [web gateways](#)

All matches to this query

| Score | Mr(calc):   | Delta     | Sequence                         |
|-------|-------------|-----------|----------------------------------|
| 36.8  | 1750.830109 | -0.003941 | <a href="#">AEEYEFLTPVEEAPK</a>  |
| 0.0   | 1750.834854 | -0.008686 | <a href="#">HANALFDYAVTGDVKM</a> |

Mascot: <http://www.matrixscience.com/>

**Peptide View**

MS/MS Fragmentation of **FFIGFGGK**

Found in **RBSK\_HUMAN**, Ribokinase OS=Homo sapiens GN=RBKS PE=1 SV=1

Match to Query 5577: 871.458768 from(436.736660,2+) rtinseconds(2973) index(40748)

Title: Locus:1.1.1.2560.2

Data file 2011-11-13 - TFD - EP 7-4.mgf

Click mouse within plot area to zoom in by factor of two about that point

Or, Plot from  to  Da

Label all possible matches  Label matches used for scoring

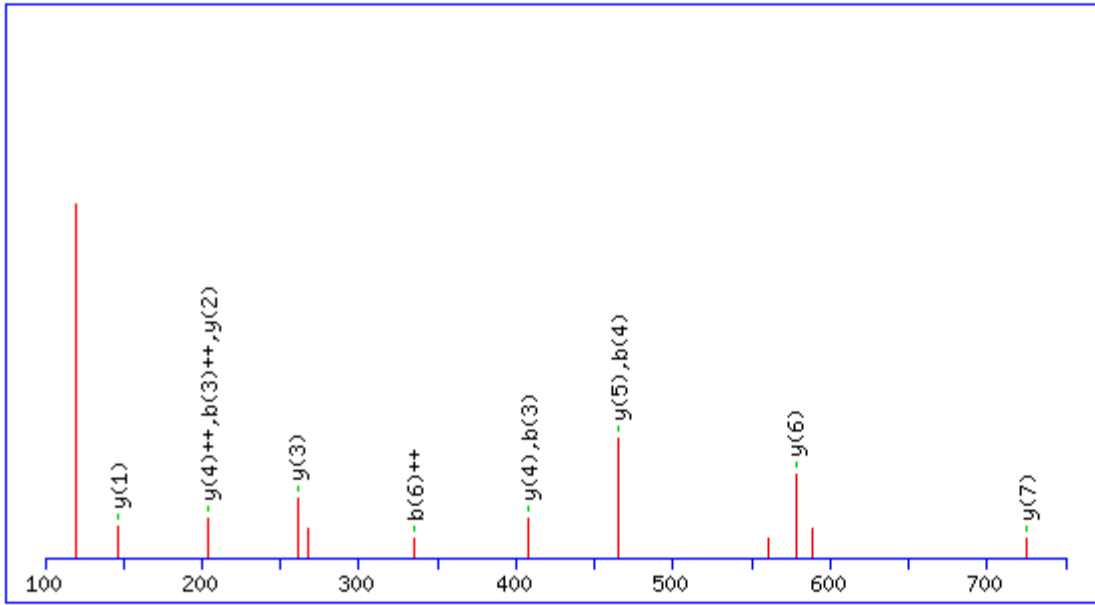

Monoisotopic mass of neutral peptide Mr(calc): 871.459244

Fixed modifications: Propionamide (C) (apply to specified residues or termini only)

Ions Score: 65 Expect: 4.9e-006

Matches : 12/42 fragment ions using 12 most intense peaks ([help](#))

| # | b                 | b <sup>++</sup>   | Seq. | y                 | y <sup>++</sup>   | y <sup>*</sup> | y <sup>*++</sup> | # |
|---|-------------------|-------------------|------|-------------------|-------------------|----------------|------------------|---|
| 1 | 148.075690        | 74.541483         | F    |                   |                   |                |                  | 8 |
| 2 | 295.144104        | 148.075690        | F    | <b>725.398088</b> | 363.202682        | 708.371539     | 354.689408       | 7 |
| 3 | <b>408.228168</b> | <b>204.617722</b> | I    | <b>578.329674</b> | 289.668475        | 561.303125     | 281.155201       | 6 |
| 4 | <b>465.249632</b> | 233.128454        | G    | <b>465.245610</b> | 233.126443        | 448.219061     | 224.613169       | 5 |
| 5 | 612.318046        | 306.662661        | F    | <b>408.224146</b> | <b>204.615711</b> | 391.197597     | 196.102437       | 4 |
| 6 | 669.339510        | <b>335.173393</b> | G    | <b>261.155732</b> | 131.081504        | 244.129183     | 122.568230       | 3 |
| 7 | 726.360974        | 363.684125        | G    | <b>204.134268</b> | 102.570772        | 187.107719     | 94.057498        | 2 |
| 8 |                   |                   | K    | <b>147.112804</b> | 74.060040         | 130.086255     | 65.546765        | 1 |

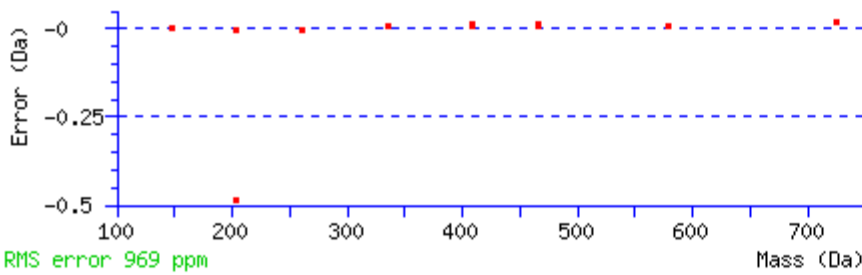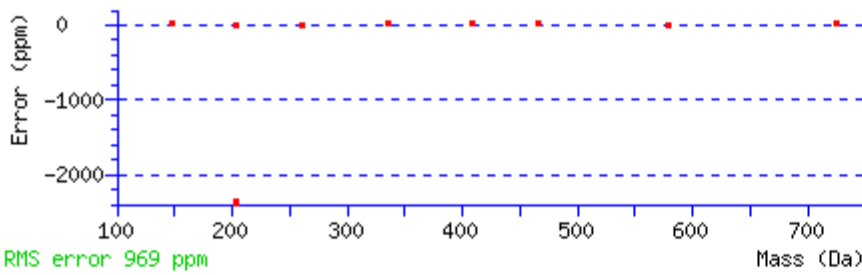

NCBI BLAST search of [FFIGFGGK](#)

(Parameters: blastp, nr protein database, expect=20000, no filter, PAM30)

Other BLAST [web gateways](#)

**All matches to this query**

| Score | Mr(calc):  | Delta     | Sequence                  |
|-------|------------|-----------|---------------------------|
| 64.6  | 871.459244 | -0.000476 | <a href="#">FFIGFGGK</a>  |
| 23.9  | 871.459229 | -0.000461 | <a href="#">FGFIFNK</a>   |
| 8.1   | 871.466415 | -0.007647 | <a href="#">AQKHFNK</a>   |
| 5.2   | 871.458557 | 0.000211  | <a href="#">NLCLPGGK</a>  |
| 4.8   | 871.451187 | 0.007581  | <a href="#">RGPSTPGGK</a> |
| 4.8   | 871.451187 | 0.007581  | <a href="#">RGPSTPGGK</a> |
| 3.9   | 871.462402 | -0.003634 | <a href="#">RRPQDGK</a>   |
| 2.1   | 871.458572 | 0.000196  | <a href="#">HTVLMQK</a>   |

# MASCOT Search Results

## Peptide View

MS/MS Fragmentation of **ELDLNSVLLK**

Found in **RNT2\_HUMAN**, Ribonuclease T2 OS=Homo sapiens GN=RNASET2 PE=1 SV=2

Match to Query 25427: 1142.657428 from(572.335990,2+) rtinseconds(3216) index(42130)

Title: Locus:1.1.1.2515.19

Data file 2011-11-13 - TFD - EP 7-6.mgf

Click mouse within plot area to zoom in by factor of two about that point

Or, Plot from  to  Da

Label all possible matches  Label matches used for scoring

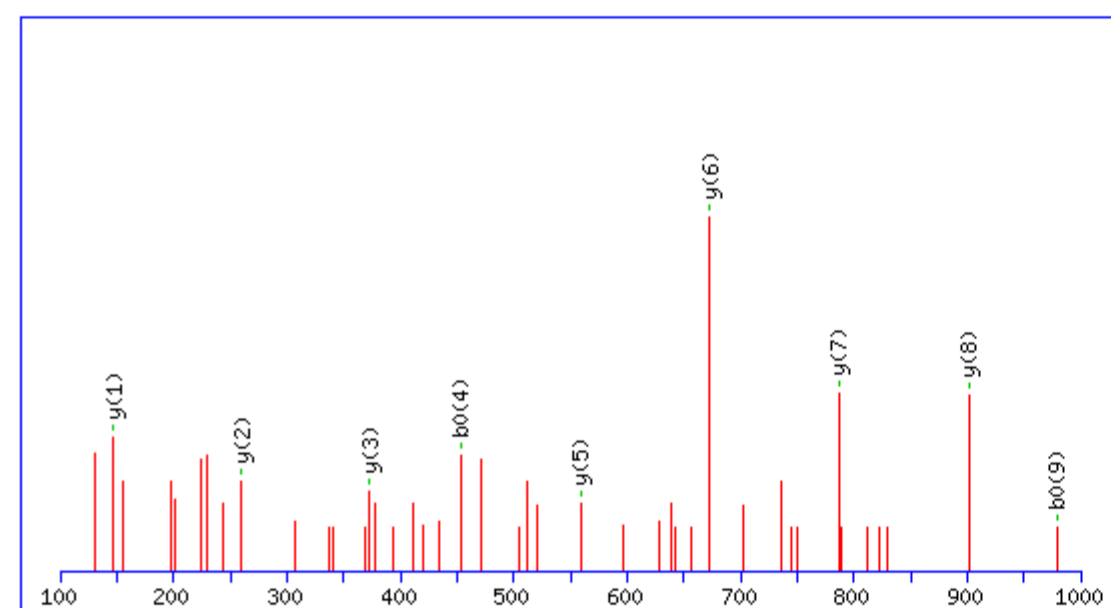

Monoisotopic mass of neutral peptide Mr(calc): 1142.654663

Fixed modifications: Propionamide (C) (apply to specified residues or termini only)

Ions Score: 62 Expect: 4.7e-006

Matches : 9/92 fragment ions using 9 most intense peaks ([help](#))

| #  | b          | b <sup>++</sup> | b <sup>*</sup> | b <sup>*++</sup> | b <sup>0</sup>    | b <sup>0++</sup> | Seq. | y                 | y <sup>++</sup> | y <sup>*</sup> | y <sup>*++</sup> | y <sup>0</sup> | y <sup>0++</sup> | #  |
|----|------------|-----------------|----------------|------------------|-------------------|------------------|------|-------------------|-----------------|----------------|------------------|----------------|------------------|----|
| 1  | 130.049869 | 65.528572       |                |                  | 112.039304        | 56.523290        | E    |                   |                 |                |                  |                |                  | 10 |
| 2  | 243.133933 | 122.070605      |                |                  | 225.123368        | 113.065322       | L    | 1014.619372       | 507.813324      | 997.592823     | 499.300050       | 996.608807     | 498.808042       | 9  |
| 3  | 358.160876 | 179.584076      |                |                  | 340.150311        | 170.578794       | D    | <b>901.535308</b> | 451.271292      | 884.508759     | 442.758017       | 883.524743     | 442.266010       | 8  |
| 4  | 471.244940 | 236.126108      |                |                  | <b>453.234375</b> | 227.120826       | L    | <b>786.508365</b> | 393.757820      | 769.481816     | 385.244546       | 768.497800     | 384.752538       | 7  |
| 5  | 585.287867 | 293.147572      | 568.261318     | 284.634297       | 567.277302        | 284.142289       | N    | <b>673.424301</b> | 337.215789      | 656.397752     | 328.702514       | 655.413736     | 328.210506       | 6  |
| 6  | 672.319895 | 336.663586      | 655.293346     | 328.150311       | 654.309330        | 327.658303       | S    | <b>559.381374</b> | 280.194325      | 542.354825     | 271.681050       | 541.370809     | 271.189042       | 5  |
| 7  | 771.388309 | 386.197793      | 754.361760     | 377.684518       | 753.377744        | 377.192510       | V    | 472.349346        | 236.678311      | 455.322797     | 228.165036       |                |                  | 4  |
| 8  | 884.472373 | 442.739825      | 867.445824     | 434.226550       | 866.461808        | 433.734542       | L    | <b>373.280932</b> | 187.144104      | 356.254383     | 178.630829       |                |                  | 3  |
| 9  | 997.556437 | 499.281857      | 980.529888     | 490.768582       | <b>979.545872</b> | 490.276574       | L    | <b>260.196868</b> | 130.602072      | 243.170319     | 122.088797       |                |                  | 2  |
| 10 |            |                 |                |                  |                   |                  | K    | <b>147.112804</b> | 74.060040       | 130.086255     | 65.546765        |                |                  | 1  |

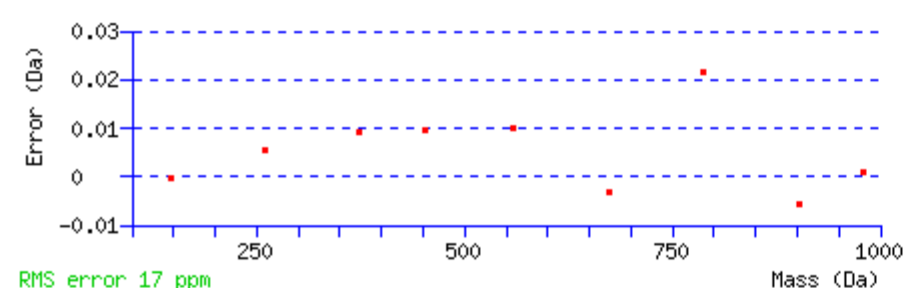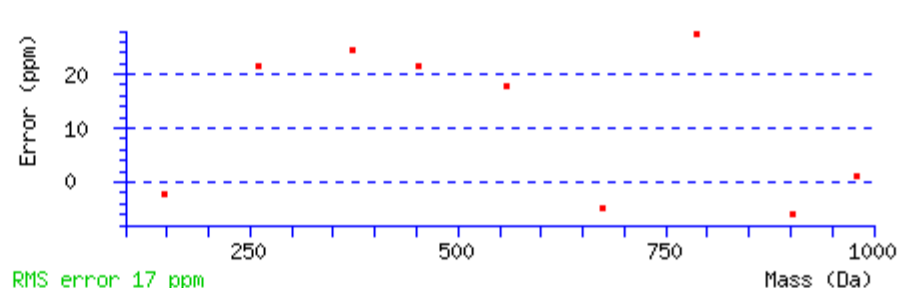

NCBI BLAST search of **ELDLNSVLLK**

(Parameters: blastp, nr protein database, expect=20000, no filter, PAM30)

Other BLAST [web gateways](#)

All matches to this query

| Score | Mr(calc):   | Delta     | Sequence                    |
|-------|-------------|-----------|-----------------------------|
| 62.0  | 1142.654663 | 0.002765  | <a href="#">ELDLNSVLLK</a>  |
| 17.9  | 1142.654663 | 0.002765  | <a href="#">LEDLATLIQK</a>  |
| 17.4  | 1142.665909 | -0.008481 | <a href="#">TKQIQEGVIK</a>  |
| 17.4  | 1142.665894 | -0.008466 | <a href="#">NQEVTIKALK</a>  |
| 15.5  | 1142.665894 | -0.008466 | <a href="#">LEGEVRSLLK</a>  |
| 9.6   | 1142.665894 | -0.008466 | <a href="#">ATAEVLNIGKK</a> |
| 7.8   | 1142.648148 | 0.009280  | <a href="#">ERVCPLVIK</a>   |
| 6.3   | 1142.654678 | 0.002750  | <a href="#">VDLDGALLIK</a>  |
| 5.7   | 1142.654694 | 0.002734  | <a href="#">GTTLVVELAPK</a> |
| 5.2   | 1142.665878 | -0.008450 | <a href="#">ELANTIKNIK</a>  |

**Peptide View**

MS/MS Fragmentation of **LALNQISQISMK**

Found in **RRFM\_HUMAN**, Ribosome-recycling factor, mitochondrial OS=Homo sapiens GN=MRRF PE=1 SV=1

Match to Query 38880: 1360.740668 from(681.377610,2+) rtinseconds(2498) index(30791)

Title: Locus:1.1.1.2242.42

Data file 2011-11-12 - TFD - EP 6-5.mgf

Click mouse within plot area to zoom in by factor of two about that point

Or, Plot from  to  Da

Label all possible matches  Label matches used for scoring

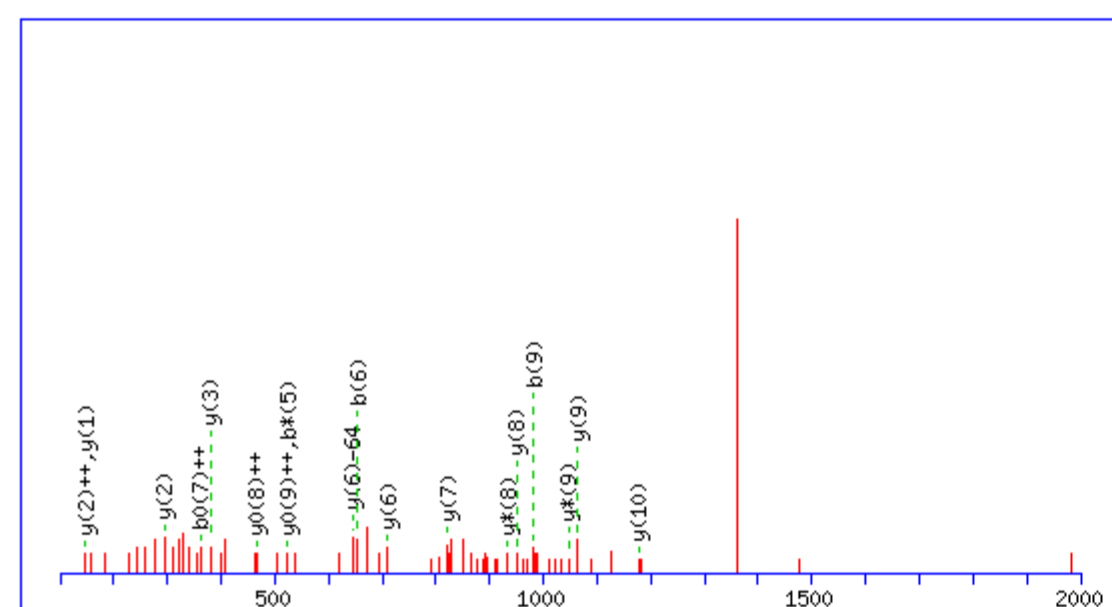

Monoisotopic mass of neutral peptide  $M_r(\text{calc})$ : 1360.738403

Fixed modifications: Propionamide (C) (apply to specified residues or termini only)

Variable modifications:

M11 : Oxidation (M), with neutral losses 0.000000 (shown in table), 63.998285

Ions Score: 46 Expect: 0.00045

Matches : 18/174 fragment ions using 32 most intense peaks ([help](#))

| #  | b                 | b <sup>++</sup> | b <sup>*</sup>    | b <sup>*++</sup> | b <sup>0</sup> | b <sup>0++</sup>  | Seq. | y                  | y <sup>++</sup>   | y <sup>*</sup>     | y <sup>*++</sup> | y <sup>0</sup> | y <sup>0++</sup>  | #  |
|----|-------------------|-----------------|-------------------|------------------|----------------|-------------------|------|--------------------|-------------------|--------------------|------------------|----------------|-------------------|----|
| 1  | 114.091340        | 57.549308       |                   |                  |                |                   | L    |                    |                   |                    |                  |                |                   | 12 |
| 2  | 185.128454        | 93.067865       |                   |                  |                |                   | A    | 1248.661649        | 624.834463        | 1231.635100        | 616.321188       | 1230.651084    | 615.829180        | 11 |
| 3  | 298.212518        | 149.609897      |                   |                  |                |                   | L    | <b>1177.624535</b> | 589.315906        | 1160.597986        | 580.802631       | 1159.613970    | 580.310623        | 10 |
| 4  | 412.255445        | 206.631361      | 395.228896        | 198.118086       |                |                   | N    | <b>1064.540471</b> | 532.773874        | <b>1047.513922</b> | 524.260599       | 1046.529906    | <b>523.768591</b> | 9  |
| 5  | 540.314023        | 270.660650      | <b>523.287474</b> | 262.147375       |                |                   | Q    | <b>950.497544</b>  | 475.752410        | <b>933.470995</b>  | 467.239136       | 932.486979     | <b>466.747128</b> | 8  |
| 6  | <b>653.398087</b> | 327.202682      | 636.371538        | 318.689407       |                |                   | I    | <b>822.438966</b>  | 411.723121        | 805.412417         | 403.209847       | 804.428401     | 402.717839        | 7  |
| 7  | 740.430115        | 370.718696      | 723.403566        | 362.205421       | 722.419550     | <b>361.713413</b> | S    | <b>709.354902</b>  | 355.181089        | 692.328353         | 346.667815       | 691.344337     | 346.175807        | 6  |
| 8  | 868.488693        | 434.747985      | 851.462144        | 426.234710       | 850.478128     | 425.742702        | Q    | 622.322874         | 311.665075        | 605.296325         | 303.151801       | 604.312309     | 302.659793        | 5  |
| 9  | <b>981.572757</b> | 491.290017      | 964.546208        | 482.776742       | 963.562192     | 482.284734        | I    | 494.264296         | 247.635786        | 477.237747         | 239.122512       | 476.253731     | 238.630504        | 4  |
| 10 | 1068.604785       | 534.806031      | 1051.578236       | 526.292756       | 1050.594220    | 525.800748        | S    | <b>381.180232</b>  | 191.093754        | 364.153683         | 182.580480       | 363.169667     | 182.088472        | 3  |
| 11 | 1215.640185       | 608.323731      | 1198.613636       | 599.810456       | 1197.629620    | 599.318448        | M    | <b>294.148204</b>  | <b>147.577740</b> | 277.121655         | 139.064465       |                |                   | 2  |
| 12 |                   |                 |                   |                  |                |                   | K    | <b>147.112804</b>  | 74.060040         | 130.086255         | 65.546765        |                |                   | 1  |

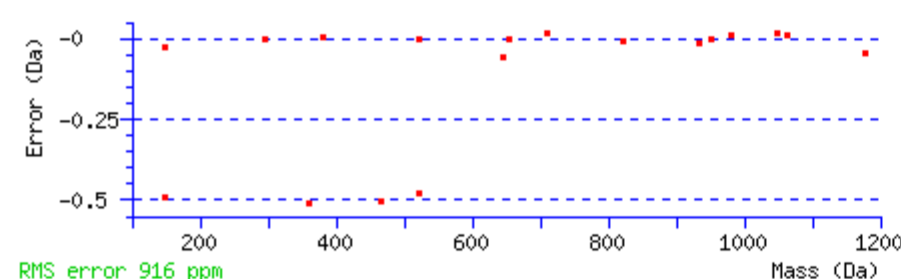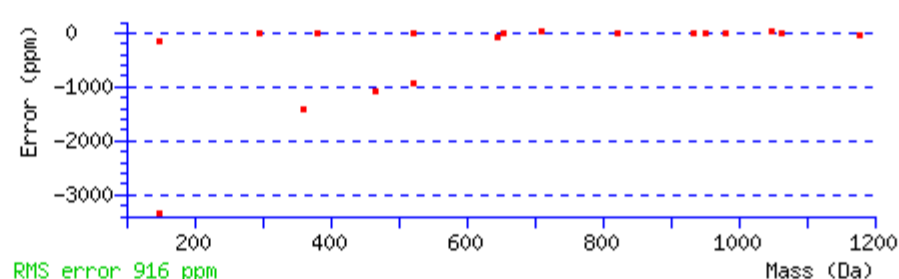

NCBI BLAST search of [LALNQISQISMK](#)

(Parameters: blastp, nr protein database, expect=20000, no filter, PAM30)

Other BLAST [web gateways](#)

**All matches to this query**

| Score | $M_r(\text{calc})$ : | Delta    | Sequence                     |
|-------|----------------------|----------|------------------------------|
| 46.3  | 1360.738403          | 0.002265 | <a href="#">LALNQISQISMK</a> |
| 10.1  | 1360.738403          | 0.002265 | <a href="#">ANKILIADTQMK</a> |
| 8.2   | 1360.735062          | 0.005606 | <a href="#">KPVAGALDVSNK</a> |

# MASCOT Search Results

## Peptide View

MS/MS Fragmentation of **IMDLPTLLR**

Found in **RN170\_HUMAN**, RING finger protein 170 OS=Homo sapiens GN=RNF170 PE=2 SV=2

Match to Query 22039: 1086.612508 from(544.313530,2+) rtinseconds(2845) index(37316)

Title: Locus:1.1.1.2373.17

Data file 2011-11-12 - TFD - EP 6-5.mgf

Click mouse within plot area to zoom in by factor of two about that point

Or,   to  Da

Label all possible matches  Label matches used for scoring

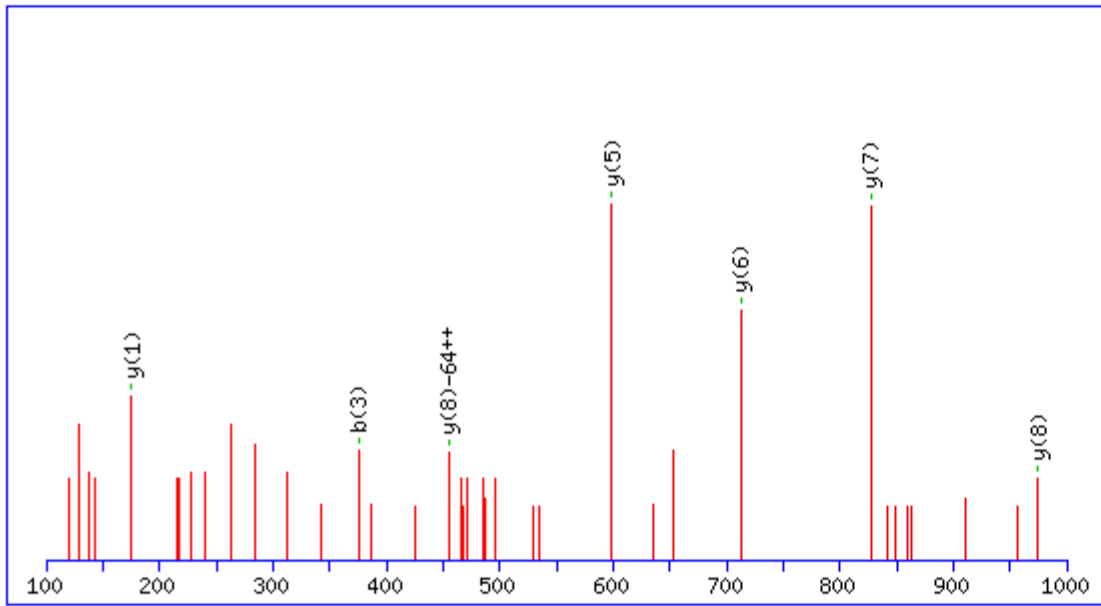

Monoisotopic mass of neutral peptide  $M_r(\text{calc})$ : 1086.610703

Fixed modifications: Propionamide (C) (apply to specified residues or termini only)

Variable modifications:

M2 : Oxidation (M), with neutral losses 0.000000 (shown in table), 63.998285

Ions Score: 40 Expect: 0.0011

Matches : 7/102 fragment ions using 8 most intense peaks ([help](#))

| # | b                 | b <sup>++</sup> | b <sup>0</sup> | b <sup>0++</sup> | Seq. | y                 | y <sup>++</sup> | y <sup>*</sup> | y <sup>*++</sup> | y <sup>0</sup> | y <sup>0++</sup> | # |
|---|-------------------|-----------------|----------------|------------------|------|-------------------|-----------------|----------------|------------------|----------------|------------------|---|
| 1 | 114.091340        | 57.549308       |                |                  | I    |                   |                 |                |                  |                |                  | 9 |
| 2 | 261.126740        | 131.067008      |                |                  | M    | <b>974.533930</b> | 487.770603      | 957.507381     | 479.257329       | 956.523365     | 478.765321       | 8 |
| 3 | <b>376.153683</b> | 188.580480      | 358.143118     | 179.575197       | D    | <b>827.498530</b> | 414.252903      | 810.471981     | 405.739629       | 809.487965     | 405.247621       | 7 |
| 4 | 489.237747        | 245.122512      | 471.227182     | 236.117229       | L    | <b>712.471587</b> | 356.739432      | 695.445038     | 348.226157       | 694.461022     | 347.734149       | 6 |
| 5 | 586.290511        | 293.648894      | 568.279946     | 284.643611       | P    | <b>599.387523</b> | 300.197400      | 582.360974     | 291.684125       | 581.376958     | 291.192117       | 5 |
| 6 | 687.338190        | 344.172733      | 669.327625     | 335.167451       | T    | 502.334759        | 251.671018      | 485.308210     | 243.157743       | 484.324194     | 242.665735       | 4 |
| 7 | 800.422254        | 400.714765      | 782.411689     | 391.709483       | L    | 401.287080        | 201.147178      | 384.260531     | 192.633904       |                |                  | 3 |
| 8 | 913.506318        | 457.256797      | 895.495753     | 448.251515       | L    | 288.203016        | 144.605146      | 271.176467     | 136.091872       |                |                  | 2 |
| 9 |                   |                 |                |                  | R    | <b>175.118952</b> | 88.063114       | 158.092403     | 79.549840        |                |                  | 1 |

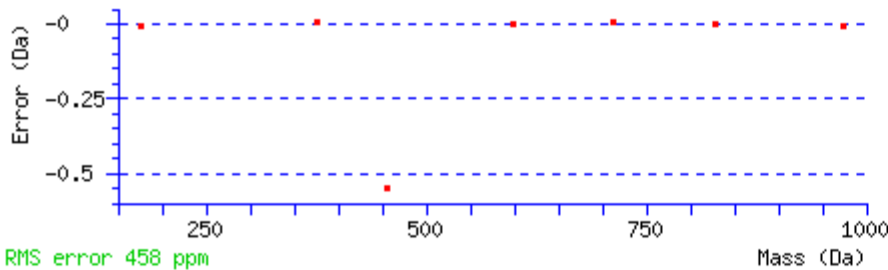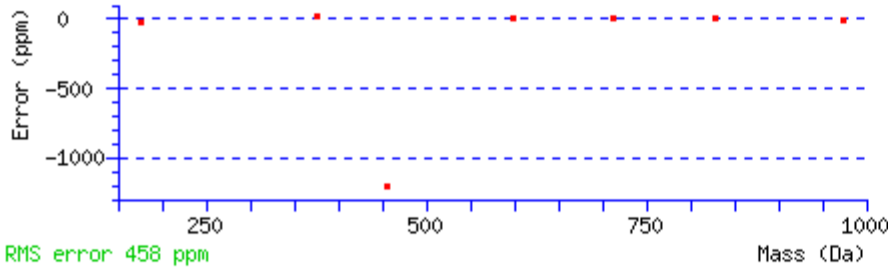

NCBI BLAST search of [IMDLPTLLR](#)

(Parameters: blastp, nr protein database, expect=20000, no filter, PAM30)

Other BLAST [web gateways](#)

## All matches to this query

| Score | $M_r(\text{calc})$ : | Delta     | Sequence                    |
|-------|----------------------|-----------|-----------------------------|
| 39.7  | 1086.610703          | 0.001805  | <a href="#">IMDLPTLLR</a>   |
| 7.8   | 1086.603287          | 0.009221  | <a href="#">DIEKLLSNR</a>   |
| 4.1   | 1086.621918          | -0.009410 | <a href="#">ITPAMAARIK</a>  |
| 3.3   | 1086.621918          | -0.009410 | <a href="#">ILAKVQEMR</a>   |
| 3.0   | 1086.618561          | -0.006053 | <a href="#">LGLPLQQYR</a>   |
| 1.4   | 1086.603302          | 0.009206  | <a href="#">LLGEALSTAGR</a> |
| 0.3   | 1086.607315          | 0.005193  | <a href="#">LEPLYSPIR</a>   |
| 0.3   | 1086.603302          | 0.009206  | <a href="#">LEQGTSALIR</a>  |



# **MASCOT** Mascot Search Results

## Peptide View

MS/MS Fragmentation of **LTADLTLDPGTAHR**

Found in **RNF39\_HUMAN**, RING finger protein 39 OS=Homo sapiens GN=RNF39 PE=1 SV=2

Match to Query 44661: 1479.769062 from(494.263630,3+) rtinseconds(2105) index(24412)

Title: Locus:1.1.1.2233.16

Data file 2011-11-13 - TFD - EP 7-4.mgf

Click mouse within plot area to zoom in by factor of two about that point

Or, Plot from  to  Da

Label all possible matches  Label matches used for scoring

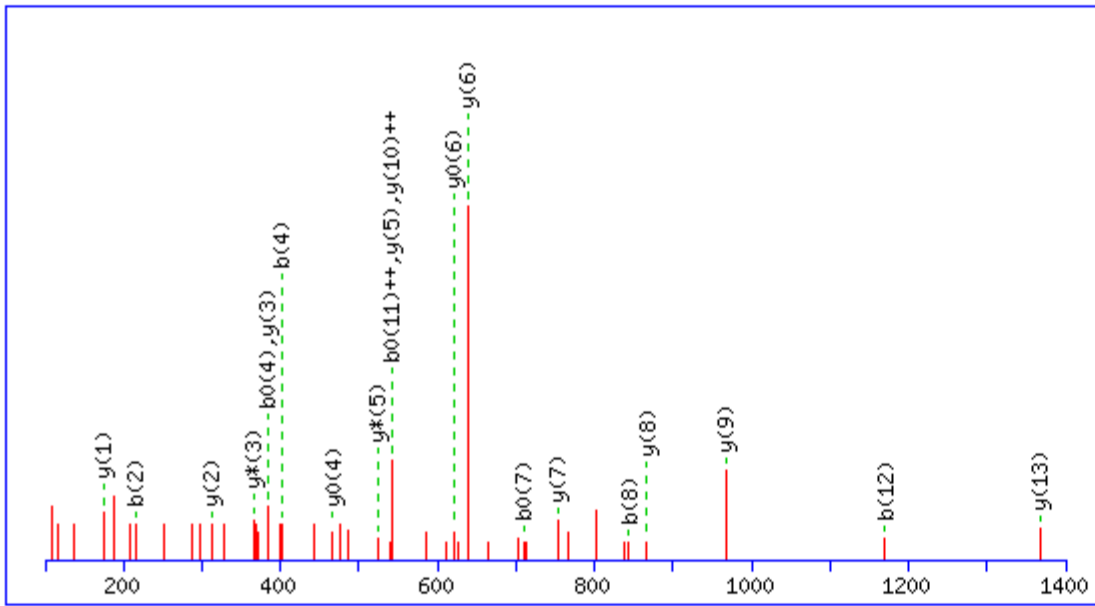

Monoisotopic mass of neutral peptide Mr(calc): 1479.768158

Fixed modifications: Propionamide (C) (apply to specified residues or termini only)

Ions Score: 58 Expect: 1.8e-005

Matches : 21/122 fragment ions using 34 most intense peaks [\(help\)](#)

| #  | b                  | b <sup>++</sup> | b <sup>0</sup>    | b <sup>0++</sup>  | Seq. | y                  | y <sup>++</sup>   | y <sup>*</sup>    | y <sup>*++</sup> | y <sup>0</sup>    | y <sup>0++</sup> | #  |
|----|--------------------|-----------------|-------------------|-------------------|------|--------------------|-------------------|-------------------|------------------|-------------------|------------------|----|
| 1  | 114.091340         | 57.549308       |                   |                   | L    |                    |                   |                   |                  |                   |                  | 14 |
| 2  | <b>215.139019</b>  | 108.073147      | 197.128454        | 99.067865         | T    | <b>1367.691371</b> | 684.349324        | 1350.664822       | 675.836049       | 1349.680806       | 675.344041       | 13 |
| 3  | 286.176133         | 143.591704      | 268.165568        | 134.586422        | A    | 1266.643692        | 633.825484        | 1249.617143       | 625.312210       | 1248.633127       | 624.820202       | 12 |
| 4  | <b>401.203076</b>  | 201.105176      | <b>383.192511</b> | 192.099894        | D    | 1195.606578        | 598.306927        | 1178.580029       | 589.793653       | 1177.596013       | 589.301645       | 11 |
| 5  | 514.287140         | 257.647208      | 496.276575        | 248.641926        | L    | 1080.579635        | <b>540.793456</b> | 1063.553086       | 532.280181       | 1062.569070       | 531.788173       | 10 |
| 6  | 615.334819         | 308.171048      | 597.324254        | 299.165765        | T    | <b>967.495571</b>  | 484.251424        | 950.469022        | 475.738149       | 949.485006        | 475.246141       | 9  |
| 7  | 728.418883         | 364.713080      | <b>710.408318</b> | 355.707797        | L    | <b>866.447892</b>  | 433.727584        | 849.421343        | 425.214310       | 848.437327        | 424.722302       | 8  |
| 8  | <b>843.445826</b>  | 422.226551      | 825.435261        | 413.221269        | D    | <b>753.363828</b>  | 377.185552        | 736.337279        | 368.672278       | 735.353263        | 368.180270       | 7  |
| 9  | 940.498590         | 470.752933      | 922.488025        | 461.747651        | P    | <b>638.336885</b>  | 319.672081        | 621.310336        | 311.158806       | <b>620.326320</b> | 310.666798       | 6  |
| 10 | 997.520054         | 499.263665      | 979.509489        | 490.258383        | G    | <b>541.284121</b>  | 271.145699        | <b>524.257572</b> | 262.632424       | 523.273556        | 262.140416       | 5  |
| 11 | 1098.567733        | 549.787505      | 1080.557168       | <b>540.782222</b> | T    | 484.262657         | 242.634966        | 467.236108        | 234.121692       | <b>466.252092</b> | 233.629684       | 4  |
| 12 | <b>1169.604847</b> | 585.306062      | 1151.594282       | 576.300779        | A    | <b>383.214978</b>  | 192.111127        | <b>366.188429</b> | 183.597852       |                   |                  | 3  |
| 13 | 1306.663759        | 653.835518      | 1288.653194       | 644.830235        | H    | <b>312.177864</b>  | 156.592570        | 295.151315        | 148.079295       |                   |                  | 2  |
| 14 |                    |                 |                   |                   | R    | <b>175.118952</b>  | 88.063114         | 158.092403        | 79.549839        |                   |                  | 1  |

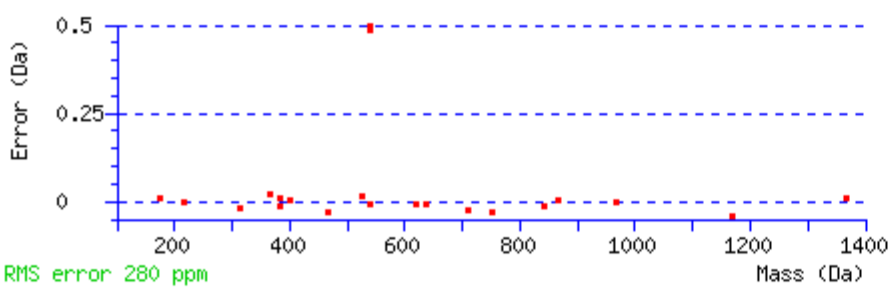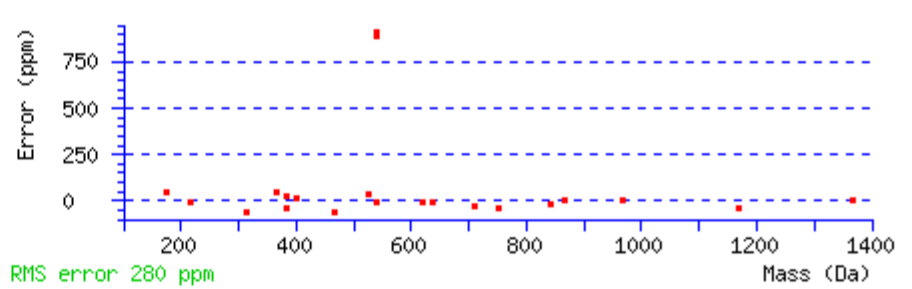

NCBI BLAST search of **LTADLTLDPGTAHR**

(Parameters: blastp, nr protein database, expect=20000, no filter, PAM30)

Other BLAST [web gateways](#)

## All matches to this query

| Score | Mr(calc):   | Delta     | Sequence                        |
|-------|-------------|-----------|---------------------------------|
| 58.0  | 1479.768158 | 0.000904  | <a href="#">LTADLTLDPGTAHR</a>  |
| 9.3   | 1479.765488 | 0.003574  | <a href="#">GGGGRPRQVSPPR</a>   |
| 5.7   | 1479.779373 | -0.010311 | <a href="#">LLRAESPAGGAPGPR</a> |
| 5.6   | 1479.775528 | -0.006466 | <a href="#">LKNPNAPMLPPP</a>    |
| 5.6   | 1479.775528 | -0.006466 | <a href="#">LKNPNAPMLPPP</a>    |
| 3.2   | 1479.783401 | -0.014339 | <a href="#">WSGALPLQALGSHK</a>  |
| 2.1   | 1479.775543 | -0.006481 | <a href="#">LNGTKDSMFGIAVK</a>  |
| 1.6   | 1479.772156 | -0.003094 | <a href="#">TILPAAAQDVYYR</a>   |
| 1.2   | 1479.779373 | -0.010311 | <a href="#">LSINHPSQGVREK</a>   |

# **MASCOT** Mascot Search Results

## Peptide View

MS/MS Fragmentation of **LQEELER**

Found in **BSN\_HUMAN**, Protein bassoon OS=Homo sapiens GN=BSN PE=1 SV=4

Match to Query 7582: 915.469948 from(458.742250,2+) rtinseconds(1341) index(10596)

Title: Locus:1.1.1.899.9

Data file 2012-01-27 - TFD - Epitel - IEC - 10ul - 1.mgf

Click mouse within plot area to zoom in by factor of two about that point

Or, Plot from  to  Da

Label all possible matches  Label matches used for scoring

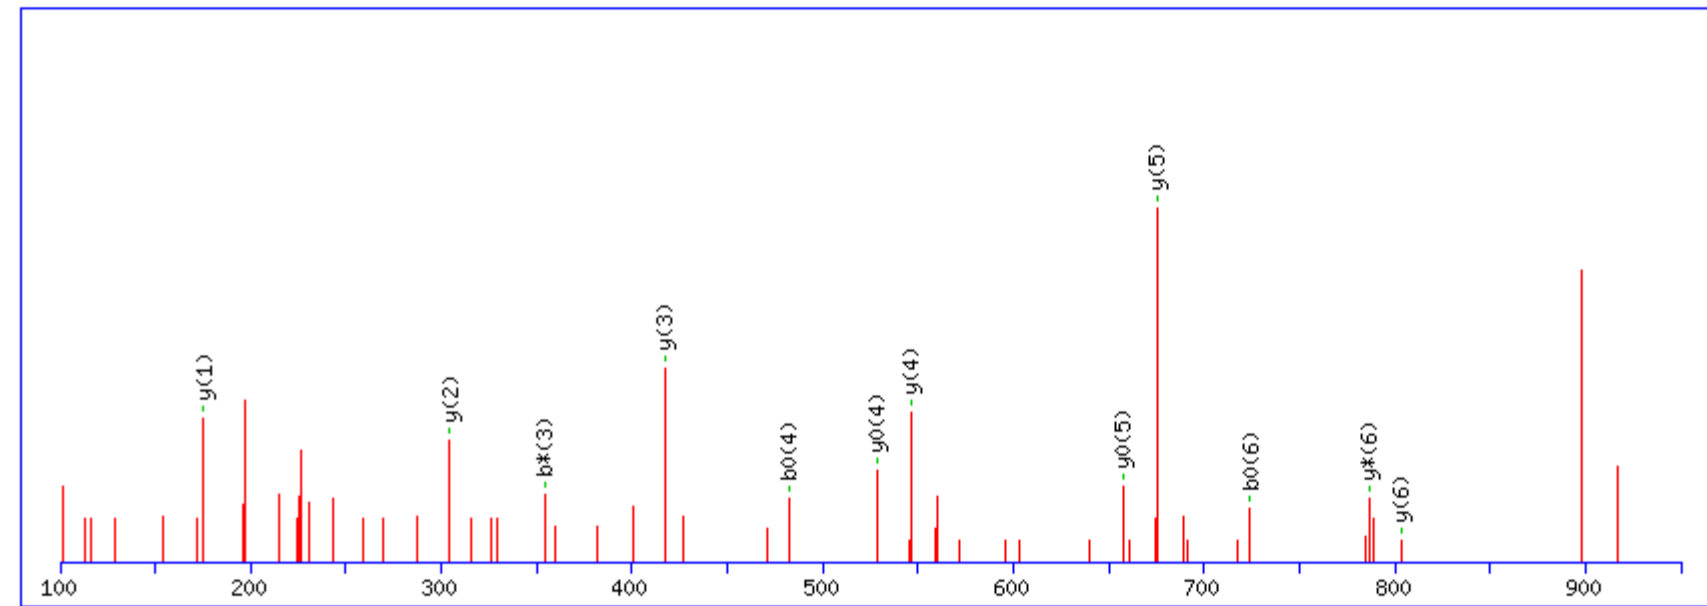

Monoisotopic mass of neutral peptide Mr(calc): 915.466125

Fixed modifications: Carbamidomethyl (C) (apply to specified residues or termini only)

Ions Score: 44 Expect: 0.0007

Matches : 12/64 fragment ions using 16 most intense peaks ([help](#))

| # | b          | b <sup>++</sup> | b <sup>*</sup> | b <sup>*++</sup> | b <sup>0</sup> | b <sup>0++</sup> | Seq. | y          | y <sup>++</sup> | y <sup>*</sup> | y <sup>*++</sup> | y <sup>0</sup> | y <sup>0++</sup> | # |
|---|------------|-----------------|----------------|------------------|----------------|------------------|------|------------|-----------------|----------------|------------------|----------------|------------------|---|
| 1 | 114.091340 | 57.549308       |                |                  |                |                  | L    |            |                 |                |                  |                |                  | 7 |
| 2 | 242.149918 | 121.578597      | 225.123369     | 113.065323       |                |                  | Q    | 803.389373 | 402.198325      | 786.362824     | 393.685050       | 785.378808     | 393.193042       | 6 |
| 3 | 371.192511 | 186.099894      | 354.165962     | 177.586619       | 353.181946     | 177.094611       | E    | 675.330795 | 338.169036      | 658.304246     | 329.655761       | 657.320230     | 329.163753       | 5 |
| 4 | 500.235104 | 250.621190      | 483.208555     | 242.107916       | 482.224539     | 241.615908       | E    | 546.288202 | 273.647739      | 529.261653     | 265.134465       | 528.277637     | 264.642457       | 4 |
| 5 | 613.319168 | 307.163222      | 596.292619     | 298.649948       | 595.308603     | 298.157940       | L    | 417.245609 | 209.126442      | 400.219060     | 200.613168       | 399.235044     | 200.121160       | 3 |
| 6 | 742.361761 | 371.684519      | 725.335212     | 363.171244       | 724.351196     | 362.679236       | E    | 304.161545 | 152.584410      | 287.134996     | 144.071136       | 286.150980     | 143.579128       | 2 |
| 7 |            |                 |                |                  |                |                  | R    | 175.118952 | 88.063114       | 158.092403     | 79.549839        |                |                  | 1 |

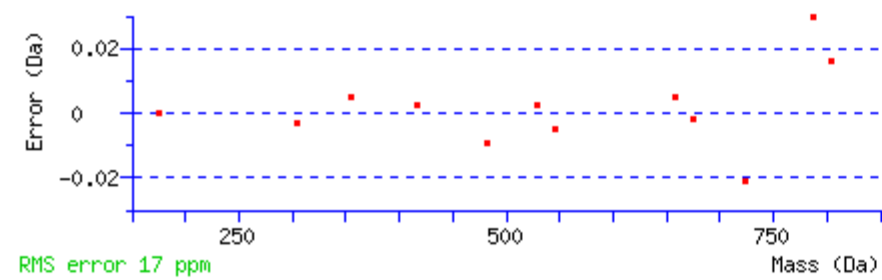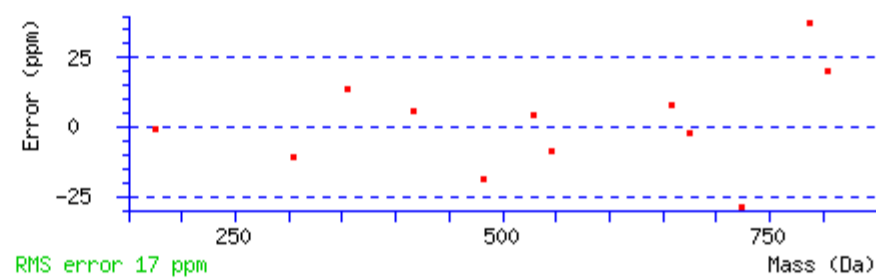

NCBI BLAST search of **LQEELER**

(Parameters: blastp, nr protein database, expect=20000, no filter, PAM30)

Other BLAST [web gateways](#)

All matches to this query

| Score | Mr(calc):  | Delta     | Sequence                 |
|-------|------------|-----------|--------------------------|
| 44.5  | 915.466125 | 0.003823  | <a href="#">LQEELER</a>  |
| 33.5  | 915.466125 | 0.003823  | <a href="#">QLEELER</a>  |
| 30.7  | 915.466125 | 0.003823  | <a href="#">IQELEER</a>  |
| 19.2  | 915.477356 | -0.007408 | <a href="#">LQEENRK</a>  |
| 19.1  | 915.477371 | -0.007423 | <a href="#">LQEQKDR</a>  |
| 18.4  | 915.477356 | -0.007408 | <a href="#">LEKENQR</a>  |
| 16.9  | 915.466125 | 0.003823  | <a href="#">LQLEEER</a>  |
| 16.9  | 915.466125 | 0.003823  | <a href="#">ELQEELER</a> |
| 12.8  | 915.477371 | -0.007423 | <a href="#">QLEQKDR</a>  |
| 11.4  | 915.477356 | -0.007408 | <a href="#">QLENEKR</a>  |

# Mascot Search Results

## Peptide View

MS/MS Fragmentation of **AQPSVSLGAPYR**

Found in **RBM14\_HUMAN**, RNA-binding protein 14 OS=Homo sapiens GN=RBM14 PE=1 SV=2

Match to Query 32393: 1244.656968 from(623.335760,2+) rtinseconds(2014) index(22051)

Title: Locus:1.1.1.2260.41

Data file 2011-11-10 - TFD - EP 4-2.mgf

Click mouse within plot area to zoom in by factor of two about that point

Or, Plot from  to  Da

Label all possible matches  Label matches used for scoring

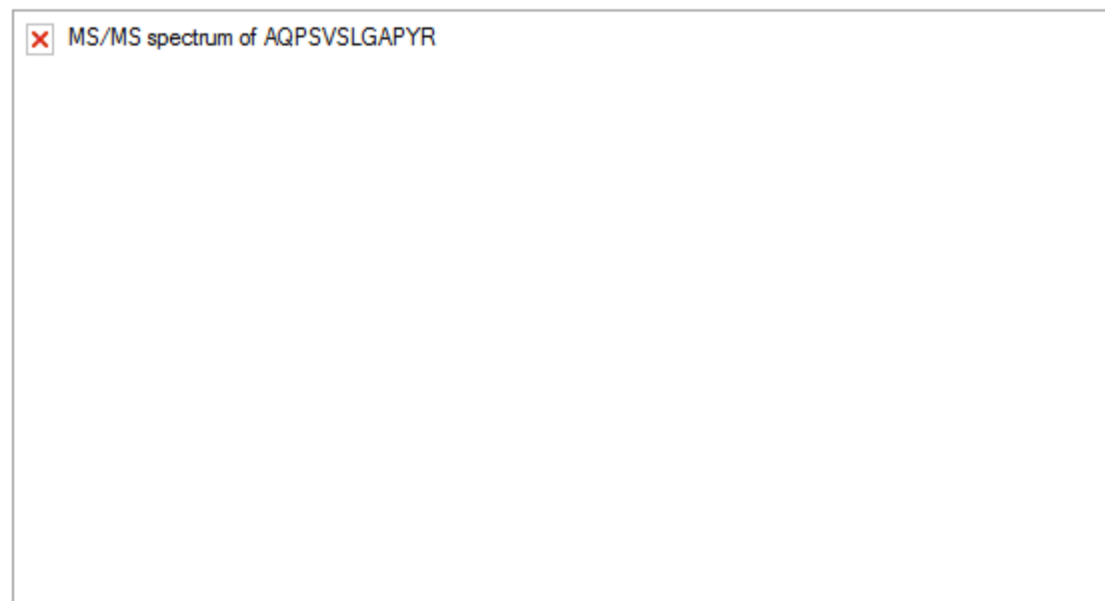

Monoisotopic mass of neutral peptide Mr(calc): 1244.651321

Fixed modifications: Propionamide (C) (apply to specified residues or termini only)

Ions Score: 43 Expect: 0.00024

Matches : 7/112 fragment ions using 11 most intense peaks ([help](#))

| #  | b           | b <sup>++</sup> | b <sup>*</sup> | b <sup>*++</sup> | b <sup>0</sup> | b <sup>0++</sup> | Seq. | y                  | y <sup>++</sup> | y <sup>*</sup>    | y <sup>*++</sup> | y <sup>0</sup> | y <sup>0++</sup> | #  |
|----|-------------|-----------------|----------------|------------------|----------------|------------------|------|--------------------|-----------------|-------------------|------------------|----------------|------------------|----|
| 1  | 72.044390   | 36.525833       |                |                  |                |                  | A    |                    |                 |                   |                  |                |                  | 12 |
| 2  | 200.102968  | 100.555122      | 183.076419     | 92.041848        |                |                  | Q    | 1174.621499        | 587.814388      | 1157.594950       | 579.301113       | 1156.610934    | 578.809105       | 11 |
| 3  | 297.155732  | 149.081504      | 280.129183     | 140.568230       |                |                  | P    | <b>1046.562921</b> | 523.785099      | 1029.536372       | 515.271824       | 1028.552356    | 514.779816       | 10 |
| 4  | 384.187760  | 192.597518      | 367.161211     | 184.084243       | 366.177195     | 183.592235       | S    | <b>949.510157</b>  | 475.258717      | 932.483608        | 466.745442       | 931.499592     | 466.253434       | 9  |
| 5  | 483.256174  | 242.131725      | 466.229625     | 233.618450       | 465.245609     | 233.126443       | V    | <b>862.478129</b>  | 431.742703      | 845.451580        | 423.229428       | 844.467564     | 422.737420       | 8  |
| 6  | 570.288202  | 285.647739      | 553.261653     | 277.134465       | 552.277637     | 276.642457       | S    | <b>763.409715</b>  | 382.208496      | 746.383166        | 373.695221       | 745.399150     | 373.203213       | 7  |
| 7  | 683.372266  | 342.189771      | 666.345717     | 333.676497       | 665.361701     | 333.184489       | L    | 676.377687         | 338.692482      | 659.351138        | 330.179207       |                |                  | 6  |
| 8  | 740.393730  | 370.700503      | 723.367181     | 362.187229       | 722.383165     | 361.695221       | G    | <b>563.293623</b>  | 282.150450      | 546.267074        | 273.637175       |                |                  | 5  |
| 9  | 811.430844  | 406.219060      | 794.404295     | 397.705786       | 793.420279     | 397.213778       | A    | 506.272159         | 253.639717      | 489.245610        | 245.126443       |                |                  | 4  |
| 10 | 908.483608  | 454.745442      | 891.457059     | 446.232168       | 890.473043     | 445.740160       | P    | <b>435.235045</b>  | 218.121160      | <b>418.208496</b> | 209.607886       |                |                  | 3  |
| 11 | 1071.546937 | 536.277107      | 1054.520388    | 527.763832       | 1053.536372    | 527.271824       | Y    | 338.182281         | 169.594778      | 321.155732        | 161.081504       |                |                  | 2  |
| 12 |             |                 |                |                  |                |                  | R    | 175.118952         | 88.063114       | 158.092403        | 79.549839        |                |                  | 1  |

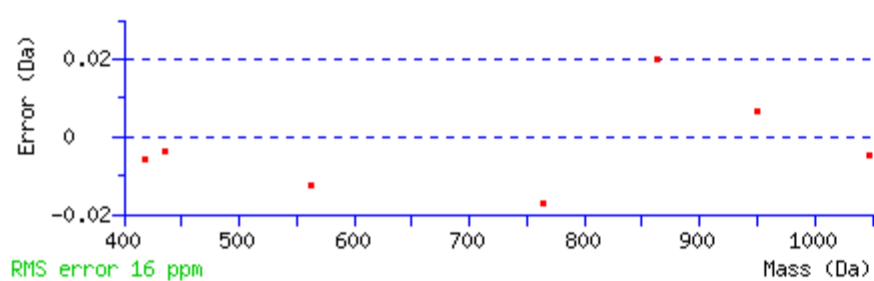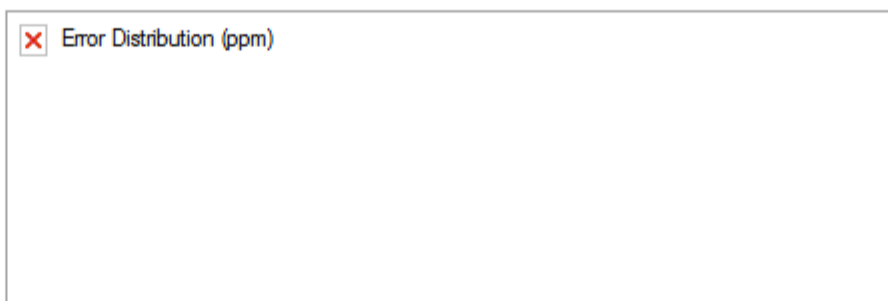

NCBI BLAST search of [AQPSVSLGAPYR](#)

(Parameters: blastp, nr protein database, expect=20000, no filter, PAM30)

Other BLAST [web gateways](#)

All matches to this query

| Score | Mr(calc):   | Delta    | Sequence                     |
|-------|-------------|----------|------------------------------|
| 42.7  | 1244.651321 | 0.005647 | <a href="#">AQPSVSLGAPYR</a> |
| 4.0   | 1244.651306 | 0.005662 | <a href="#">AQPEGKNNLFK</a>  |

# MASCOT Search Results

## Peptide View

MS/MS Fragmentation of **INLYTDR**

Found in **FUS\_HUMAN**, RNA-binding protein FUS OS=Homo sapiens GN=FUS PE=1 SV=1

Match to Query 6137: 893.457448 from(447.736000,2+) rtinseconds(1626) index(16046)

Title: Locus:1.1.1.1008.9

Data file 2012-01-27 - TFD - Epitel - IEC - 10ul - 1.mgf

Click mouse within plot area to zoom in by factor of two about that point

Or, Plot from  to  Da

Label all possible matches  Label matches used for scoring

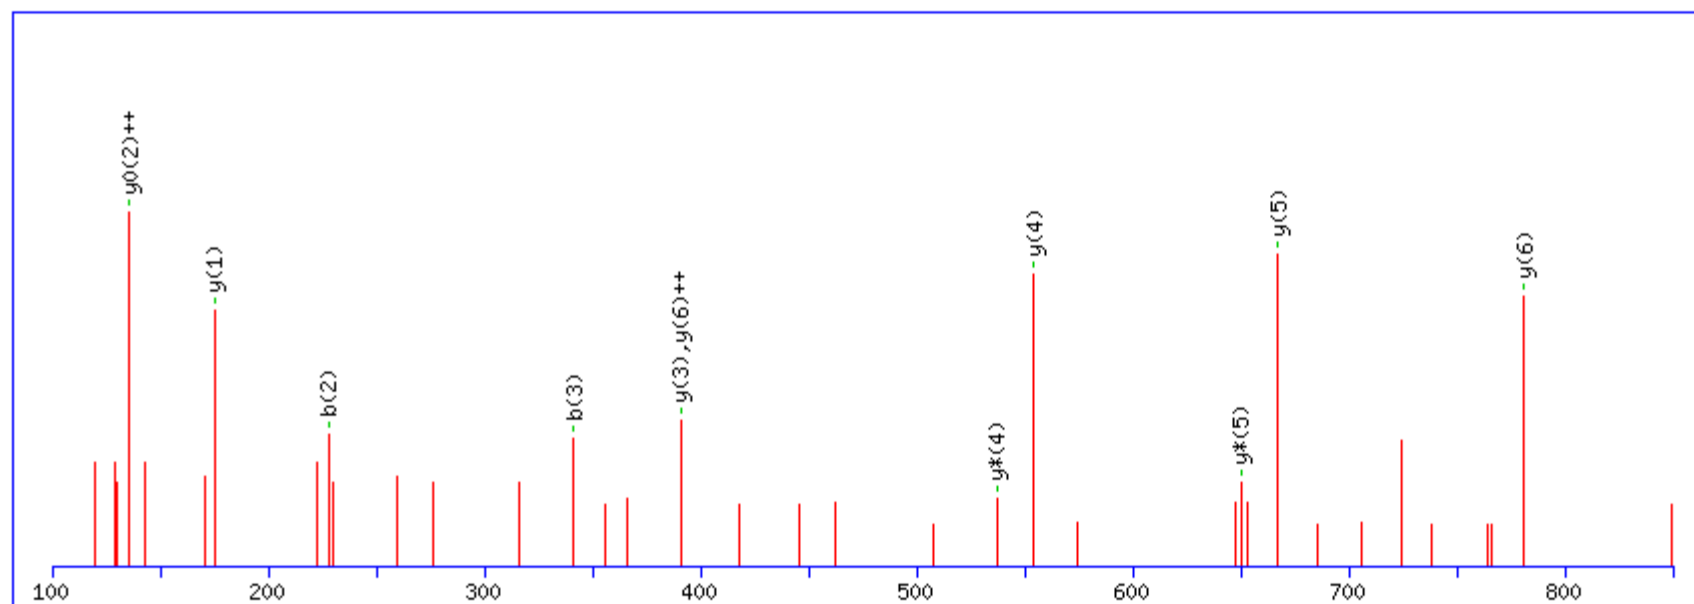

Monoisotopic mass of neutral peptide Mr(calc): 893.460663

Fixed modifications: Carbamidomethyl (C) (apply to specified residues or termini only)

Ions Score: 36 Expect: 0.003

Matches : 11/60 fragment ions using 15 most intense peaks [\(help\)](#)

| # | b                 | b <sup>++</sup> | b <sup>*</sup> | b <sup>*++</sup> | b <sup>0</sup> | b <sup>0++</sup> | Seq. | y                 | y <sup>++</sup>   | y <sup>*</sup>    | y <sup>*++</sup> | y <sup>0</sup> | y <sup>0++</sup>  | # |
|---|-------------------|-----------------|----------------|------------------|----------------|------------------|------|-------------------|-------------------|-------------------|------------------|----------------|-------------------|---|
| 1 | 114.091340        | 57.549308       |                |                  |                |                  | I    |                   |                   |                   |                  |                |                   | 7 |
| 2 | <b>228.134267</b> | 114.570771      | 211.107718     | 106.057497       |                |                  | N    | <b>781.383894</b> | <b>391.195585</b> | 764.357345        | 382.682310       | 763.373329     | 382.190302        | 6 |
| 3 | <b>341.218331</b> | 171.112803      | 324.191782     | 162.599529       |                |                  | L    | <b>667.340967</b> | 334.174122        | <b>650.314418</b> | 325.660847       | 649.330402     | 325.168839        | 5 |
| 4 | 504.281660        | 252.644468      | 487.255111     | 244.131193       |                |                  | Y    | <b>554.256903</b> | 277.632090        | <b>537.230354</b> | 269.118815       | 536.246338     | 268.626807        | 4 |
| 5 | 605.329339        | 303.168308      | 588.302790     | 294.655033       | 587.318774     | 294.163025       | T    | <b>391.193574</b> | 196.100425        | 374.167025        | 187.587150       | 373.183009     | 187.095142        | 3 |
| 6 | 720.356282        | 360.681779      | 703.329733     | 352.168504       | 702.345717     | 351.676496       | D    | 290.145895        | 145.576585        | 273.119346        | 137.063311       | 272.135330     | <b>136.571303</b> | 2 |
| 7 |                   |                 |                |                  |                |                  | R    | <b>175.118952</b> | 88.063114         | 158.092403        | 79.549839        |                |                   | 1 |

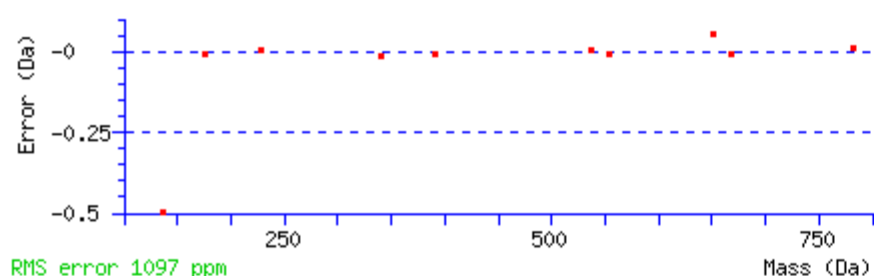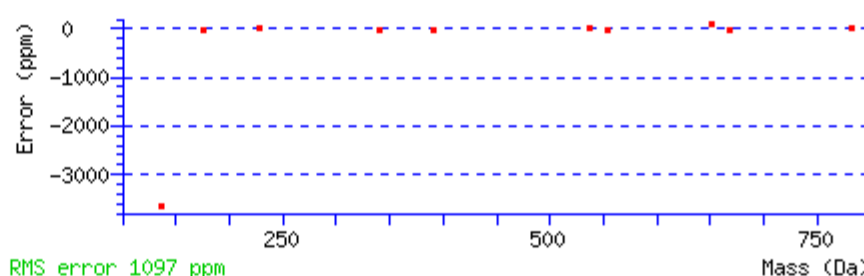

NCBI BLAST search of **INLYTDR**

(Parameters: blastp, nr protein database, expect=20000, no filter, PAM30)

Other BLAST [web gateways](#)

## All matches to this query

| Score | Mr(calc):  | Delta     | Sequence                 |
|-------|------------|-----------|--------------------------|
| 36.1  | 893.460663 | -0.003215 | <a href="#">INLYTDR</a>  |
| 8.7   | 893.460648 | -0.003200 | <a href="#">NPYAASKK</a> |
| 5.6   | 893.452805 | 0.004643  | <a href="#">LTSMAVEK</a> |
| 3.1   | 893.454147 | 0.003301  | <a href="#">IHPGMAPR</a> |
| 2.3   | 893.449432 | 0.008016  | <a href="#">KPVDEYK</a>  |
| 0.5   | 893.454147 | 0.003301  | <a href="#">IHPGMAPR</a> |

# Mascot Search Results

## Peptide View

MS/MS Fragmentation of **ELSPVSFQYR**

Found in **RWDD4\_HUMAN**, RWD domain-containing protein 4 OS=Homo sapiens GN=RWDD4 PE=1 SV=3

Match to Query 30783: 1224.609968 from(613.312260,2+) rtinseconds(2576) index(30510)

Title: Locus:1.1.1.2249.31

Data file 2011-11-10 - TFD - EP 3-6.mgf

Click mouse within plot area to zoom in by factor of two about that point

Or, Plot from  to  Da

Label all possible matches  Label matches used for scoring

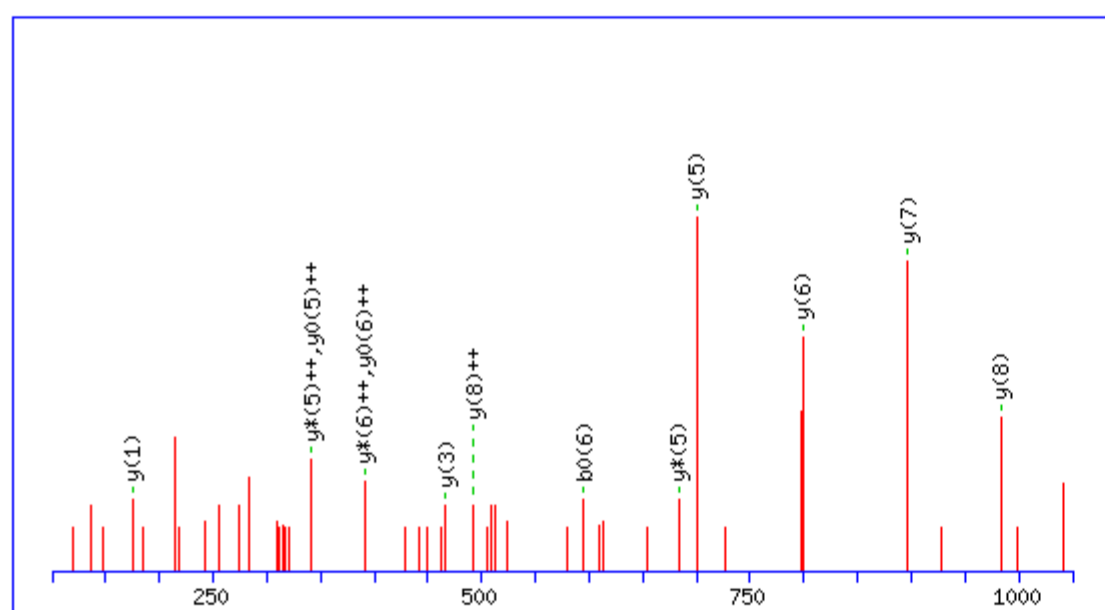

Monoisotopic mass of neutral peptide Mr(calc): 1224.613876

Fixed modifications: Propionamide (C) (apply to specified residues or termini only)

Ions Score: 34 Expect: 0.0043

Matches : 13/86 fragment ions using 18 most intense peaks ([help](#))

| #  | b           | b <sup>++</sup> | b <sup>*</sup> | b <sup>+++</sup> | b <sup>0</sup>    | b <sup>0++</sup> | Seq. | y                 | y <sup>++</sup>   | y <sup>*</sup>    | y <sup>+++</sup>  | y <sup>0</sup> | y <sup>0++</sup>  | #  |
|----|-------------|-----------------|----------------|------------------|-------------------|------------------|------|-------------------|-------------------|-------------------|-------------------|----------------|-------------------|----|
| 1  | 130.049869  | 65.528572       |                |                  | 112.039304        | 56.523290        | E    |                   |                   |                   |                   |                |                   | 10 |
| 2  | 243.133933  | 122.070605      |                |                  | 225.123368        | 113.065322       | L    | 1096.578571       | 548.792923        | 1079.552022       | 540.279649        | 1078.568006    | 539.787641        | 9  |
| 3  | 330.165961  | 165.586618      |                |                  | 312.155396        | 156.581336       | S    | <b>983.494507</b> | <b>492.250891</b> | 966.467958        | 483.737617        | 965.483942     | 483.245609        | 8  |
| 4  | 427.218725  | 214.113001      |                |                  | 409.208160        | 205.107718       | P    | <b>896.462479</b> | 448.734877        | 879.435930        | 440.221603        | 878.451914     | 439.729595        | 7  |
| 5  | 526.287139  | 263.647208      |                |                  | 508.276574        | 254.641925       | V    | <b>799.409715</b> | 400.208495        | 782.383166        | <b>391.695221</b> | 781.399150     | <b>391.203213</b> | 6  |
| 6  | 613.319167  | 307.163222      |                |                  | <b>595.308602</b> | 298.157939       | S    | <b>700.341301</b> | 350.674288        | <b>683.314752</b> | <b>342.161014</b> | 682.330736     | <b>341.669006</b> | 5  |
| 7  | 760.387581  | 380.697429      |                |                  | 742.377016        | 371.692146       | F    | 613.309273        | 307.158275        | 596.282724        | 298.645000        |                |                   | 4  |
| 8  | 888.446159  | 444.726718      | 871.419610     | 436.213443       | 870.435594        | 435.721435       | Q    | <b>466.240859</b> | 233.624067        | 449.214310        | 225.110793        |                |                   | 3  |
| 9  | 1051.509488 | 526.258382      | 1034.482939    | 517.745108       | 1033.498923       | 517.253099       | Y    | 338.182281        | 169.594778        | 321.155732        | 161.081504        |                |                   | 2  |
| 10 |             |                 |                |                  |                   |                  | R    | <b>175.118952</b> | 88.063114         | 158.092403        | 79.549839         |                |                   | 1  |

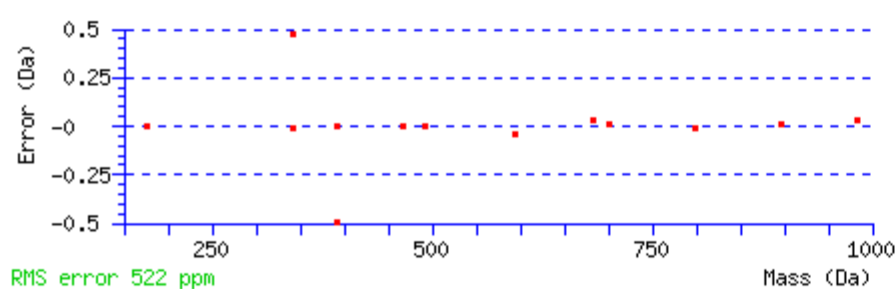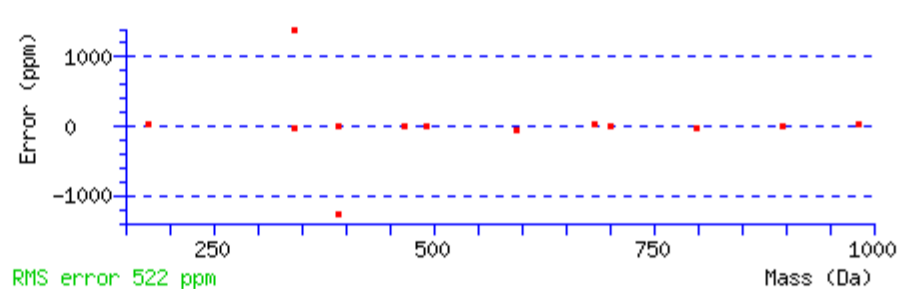

NCBI BLAST search of [ELSPVSFQYR](#)

(Parameters: blastp, nr protein database, expect=20000, no filter, PAM30)

Other BLAST [web gateways](#)

## All matches to this query

| Score | Mr(calc):   | Delta     | Sequence                     |
|-------|-------------|-----------|------------------------------|
| 34.0  | 1224.613876 | -0.003908 | <a href="#">ELSPVSFQYR</a>   |
| 8.8   | 1224.617264 | -0.007296 | <a href="#">LVVDVSGSMYR</a>  |
| 5.9   | 1224.602005 | 0.007963  | <a href="#">MVSNTKSVDTK</a>  |
| 4.5   | 1224.613861 | -0.003893 | <a href="#">ELYPSLGAGYR</a>  |
| 4.0   | 1224.617233 | -0.007265 | <a href="#">MPDPAKSAPAPK</a> |

# MASCOT SCIENCE Mascot Search Results

## Peptide View

MS/MS Fragmentation of **TTVVYPATEK**

Found in **DCPS\_HUMAN**, Scavenger mRNA-decapping enzyme DcpS OS=Homo sapiens GN=DCPS PE=1 SV=2

Match to Query 16983: 1107.572328 from(554.793440,2+) rtinseconds(1163) index(6694)

Title: Locus:1.1.1.889.24

Data file 2012-01-27 - TFD - Epitel - IEC - 10ul - 3.mgf

Click mouse within plot area to zoom in by factor of two about that point

Or, Plot from  to  Da

Label all possible matches  Label matches used for scoring

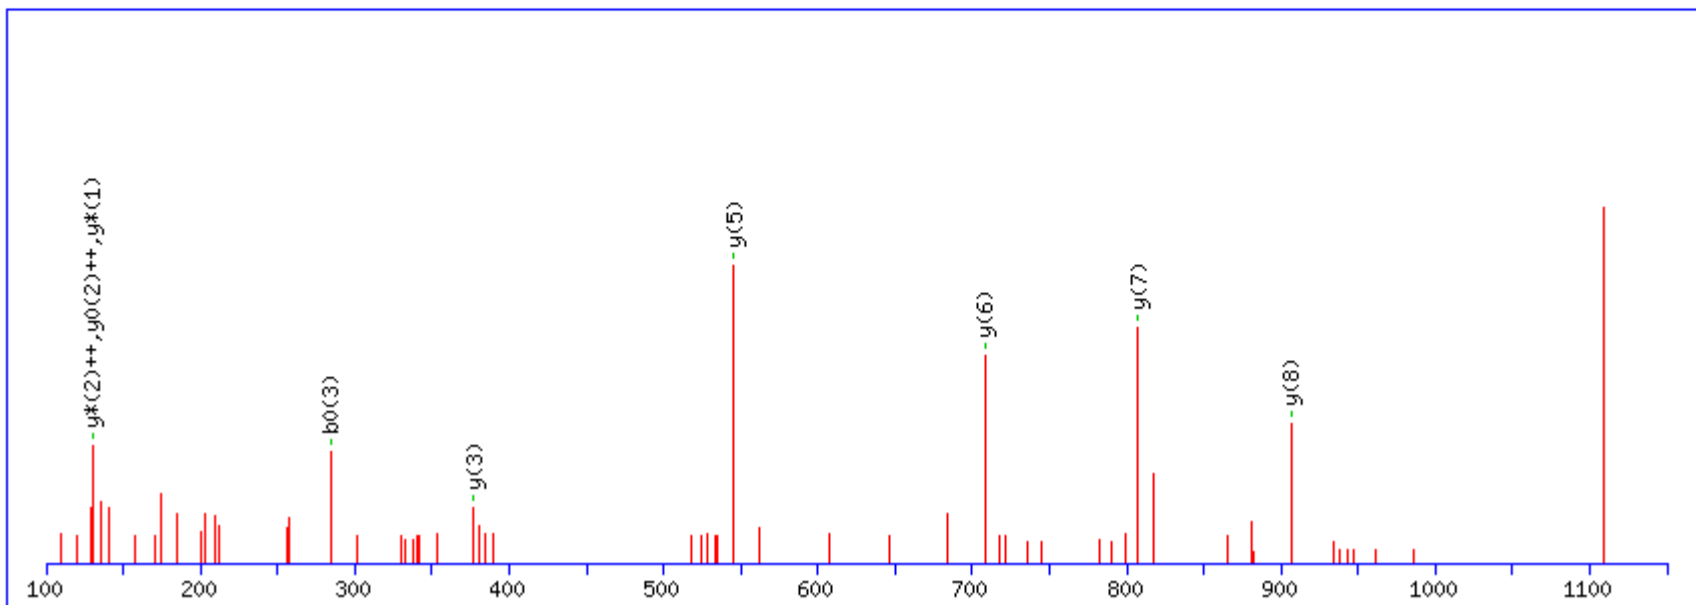

Monoisotopic mass of neutral peptide Mr(calc): 1107.581192

Fixed modifications: Carbamidomethyl (C) (apply to specified residues or termini only)

Ions Score: 40 Expect: 0.0014

Matches : 9/88 fragment ions using 8 most intense peaks ([help](#))

| #  | b          | b <sup>++</sup> | b <sup>0</sup> | b <sup>0++</sup> | Seq. | y           | y <sup>++</sup> | y <sup>*</sup> | y <sup>*++</sup> | y <sup>0</sup> | y <sup>0++</sup> | #  |
|----|------------|-----------------|----------------|------------------|------|-------------|-----------------|----------------|------------------|----------------|------------------|----|
| 1  | 102.054955 | 51.531116       | 84.044390      | 42.525833        | T    |             |                 |                |                  |                |                  | 10 |
| 2  | 203.102634 | 102.054955      | 185.092069     | 93.049672        | T    | 1007.540790 | 504.274033      | 990.514241     | 495.760759       | 989.530225     | 495.268751       | 9  |
| 3  | 302.171048 | 151.589162      | 284.160483     | 142.583879       | V    | 906.493111  | 453.750194      | 889.466562     | 445.236919       | 888.482546     | 444.744911       | 8  |
| 4  | 401.239462 | 201.123369      | 383.228897     | 192.118087       | V    | 807.424697  | 404.215987      | 790.398148     | 395.702712       | 789.414132     | 395.210704       | 7  |
| 5  | 564.302791 | 282.655034      | 546.292226     | 273.649751       | Y    | 708.356283  | 354.681780      | 691.329734     | 346.168505       | 690.345718     | 345.676497       | 6  |
| 6  | 661.355555 | 331.181416      | 643.344990     | 322.176133       | P    | 545.292954  | 273.150115      | 528.266405     | 264.636841       | 527.282389     | 264.144833       | 5  |
| 7  | 732.392669 | 366.699973      | 714.382104     | 357.694690       | A    | 448.240190  | 224.623733      | 431.213641     | 216.110458       | 430.229625     | 215.618450       | 4  |
| 8  | 833.440348 | 417.223812      | 815.429783     | 408.218530       | T    | 377.203076  | 189.105176      | 360.176527     | 180.591901       | 359.192511     | 180.099893       | 3  |
| 9  | 962.482941 | 481.745109      | 944.472376     | 472.739826       | E    | 276.155397  | 138.581336      | 259.128848     | 130.068062       | 258.144832     | 129.576054       | 2  |
| 10 |            |                 |                |                  | K    | 147.112804  | 74.060040       | 130.086255     | 65.546765        |                |                  | 1  |

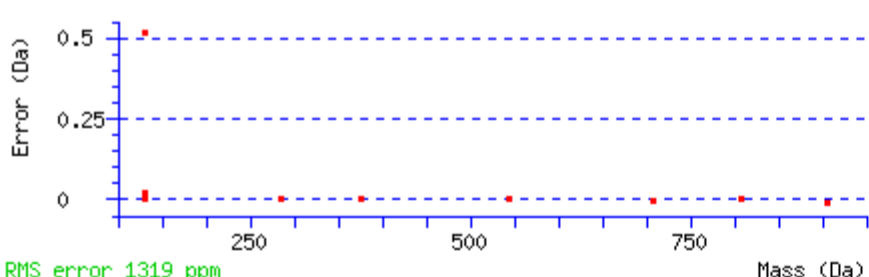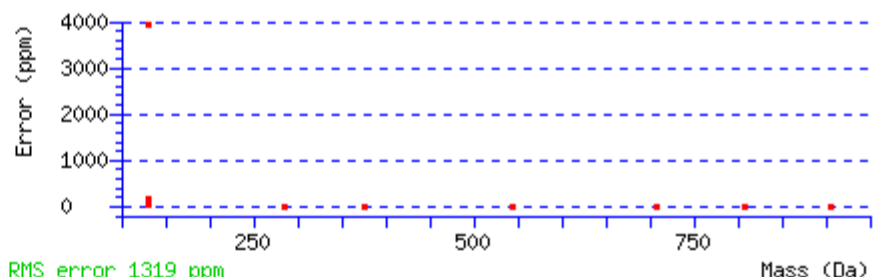

NCBI BLAST search of [TTVVYPATEK](#)

(Parameters: blastp, nr protein database, expect=20000, no filter, PAM30)

Other BLAST [web gateways](#)

## All matches to this query

| Score | Mr(calc):   | Delta     | Sequence                   |
|-------|-------------|-----------|----------------------------|
| 39.7  | 1107.581192 | -0.008864 | <a href="#">TTVVYPATEK</a> |
| 9.8   | 1107.578506 | -0.006178 | <a href="#">EGPPGPVQR</a>  |
| 9.1   | 1107.578506 | -0.006178 | <a href="#">EGPPGPVQR</a>  |
| 5.9   | 1107.567261 | 0.005067  | <a href="#">EPHVEQITR</a>  |
| 2.8   | 1107.567261 | 0.005067  | <a href="#">AEHIPSGPLR</a> |
| 0.7   | 1107.567276 | 0.005052  | <a href="#">AGQQPPPPLR</a> |
| 0.7   | 1107.567276 | 0.005052  | <a href="#">AGQQPPPPLR</a> |
| 0.4   | 1107.567276 | 0.005052  | <a href="#">AGQQPPPPLR</a> |

# Mascot Search Results

## Peptide View

MS/MS Fragmentation of **VTLGTQQR**

Found in **SLFN5\_HUMAN**, Schlafen family member 5 OS=Homo sapiens GN=SLFN5 PE=1 SV=1

Match to Query 8427: 901.497508 from(451.756030,2+) rtinseconds(1028) index(4133)

Title: Locus:1.1.1.1838.16

Data file 2011-11-10 - TFD - EP 3-2.mgf

Click mouse within plot area to zoom in by factor of two about that point

Or, Plot from  to  Da

Label all possible matches  Label matches used for scoring

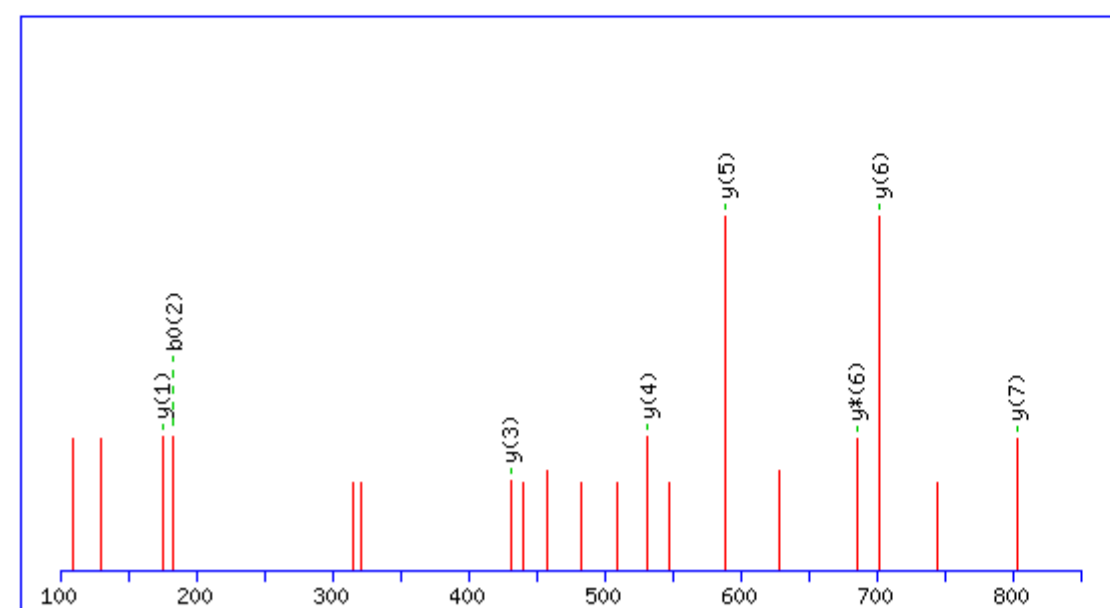

Monoisotopic mass of neutral peptide Mr(calc): 901.498138

Fixed modifications: Propionamide (C) (apply to specified residues or termini only)

Ions Score: 46 Expect: 0.00031

Matches : 8/66 fragment ions using 12 most intense peaks [\(help\)](#)

| # | b          | b <sup>++</sup> | b*         | b <sup>+++</sup> | b <sup>0</sup> | b <sup>0++</sup> | Seq. | y          | y <sup>++</sup> | y*         | y <sup>+++</sup> | y <sup>0</sup> | y <sup>0++</sup> | # |
|---|------------|-----------------|------------|------------------|----------------|------------------|------|------------|-----------------|------------|------------------|----------------|------------------|---|
| 1 | 100.075690 | 50.541483       |            |                  |                |                  | V    |            |                 |            |                  |                |                  | 8 |
| 2 | 201.123369 | 101.065322      |            |                  | 183.112804     | 92.060040        | T    | 803.436994 | 402.222135      | 786.410445 | 393.708861       | 785.426429     | 393.216853       | 7 |
| 3 | 314.207433 | 157.607354      |            |                  | 296.196868     | 148.602072       | L    | 702.389315 | 351.698296      | 685.362766 | 343.185021       | 684.378750     | 342.693013       | 6 |
| 4 | 371.228897 | 186.118086      |            |                  | 353.218332     | 177.112804       | G    | 589.305251 | 295.156264      | 572.278702 | 286.642989       | 571.294686     | 286.150981       | 5 |
| 5 | 472.276576 | 236.641926      |            |                  | 454.266011     | 227.636643       | T    | 532.283787 | 266.645532      | 515.257238 | 258.132257       | 514.273222     | 257.640249       | 4 |
| 6 | 600.335154 | 300.671215      | 583.308605 | 292.157941       | 582.324589     | 291.665933       | Q    | 431.236108 | 216.121692      | 414.209559 | 207.608418       |                |                  | 3 |
| 7 | 728.393732 | 364.700504      | 711.367183 | 356.187230       | 710.383167     | 355.695222       | Q    | 303.177530 | 152.092403      | 286.150981 | 143.579129       |                |                  | 2 |
| 8 |            |                 |            |                  |                |                  | R    | 175.118952 | 88.063114       | 158.092403 | 79.549840        |                |                  | 1 |

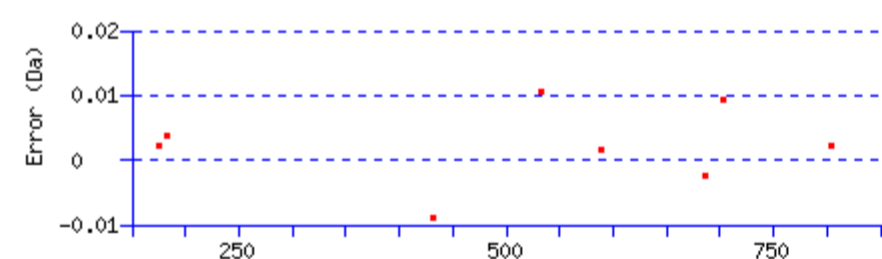

RMS error 14 ppm

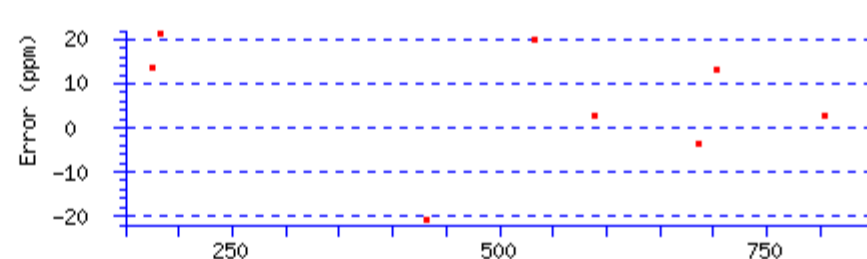

RMS error 14 ppm

NCBI BLAST search of **VTLGTQQR**

(Parameters: blastp, nr protein database, expect=20000, no filter, PAM30)

Other BLAST [web gateways](#)

All matches to this query

| Score | Mr(calc):  | Delta     | Sequence                  |
|-------|------------|-----------|---------------------------|
| 45.9  | 901.498138 | -0.000630 | <a href="#">VTLGTQQR</a>  |
| 15.1  | 901.502136 | -0.004628 | <a href="#">SLLDWLR</a>   |
| 15.1  | 901.498093 | -0.000585 | <a href="#">SLLLEERR</a>  |
| 13.7  | 901.498123 | -0.000615 | <a href="#">VTATANLGR</a> |
| 13.7  | 901.498108 | -0.000600 | <a href="#">VTRIEER</a>   |
| 13.7  | 901.502151 | -0.004643 | <a href="#">VTVEWLR</a>   |
| 8.7   | 901.498123 | -0.000615 | <a href="#">TVAVASAQR</a> |
| 8.1   | 901.498093 | -0.000585 | <a href="#">IEAASQKR</a>  |
| 6.8   | 901.505524 | -0.008016 | <a href="#">VVGDLMLR</a>  |
| 6.4   | 901.498108 | -0.000600 | <a href="#">ELKTQQR</a>   |

Mascot: <http://www.matrixscience.com/>

# **MASCOT** Mascot Search Results

## Peptide View

MS/MS Fragmentation of **LILPELGPVFK**

Found in **SCYL2\_HUMAN**, SCY1-like protein 2 OS=Homo sapiens GN=SCYL2 PE=1 SV=1

Match to Query 32962: 1224.751888 from(613.383220,2+) rtinseconds(3721) index(54211)

Title: Locus:1.1.1.2832.17

Data file 2011-11-14 - TFD - EP 8-2.mgf

Click mouse within plot area to zoom in by factor of two about that point

Or,   to  Da

Label all possible matches  Label matches used for scoring

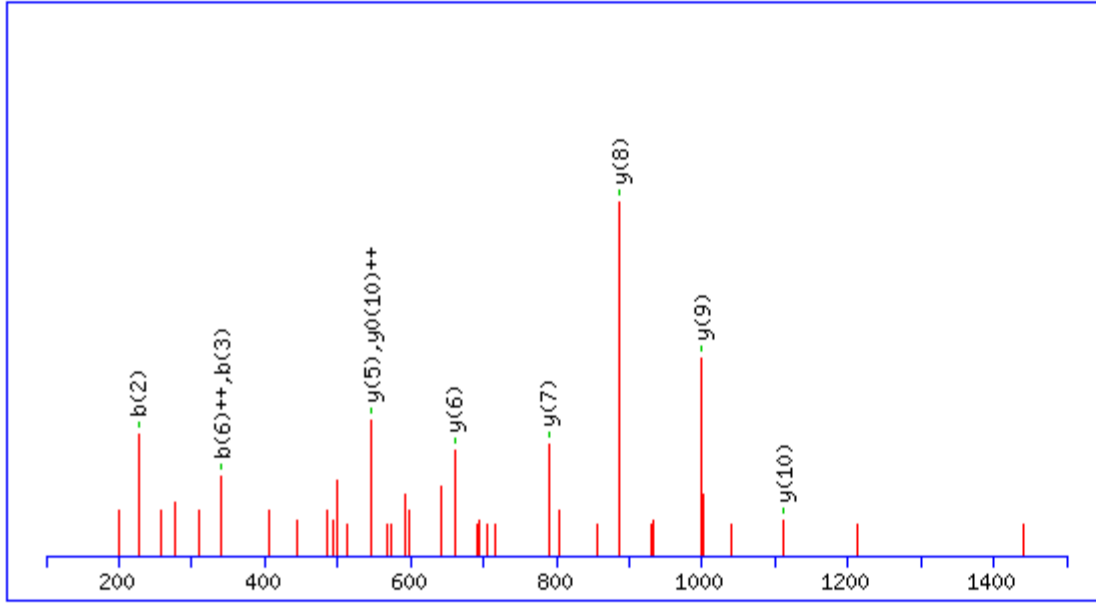

Monoisotopic mass of neutral peptide Mr(calc): 1224.748184

Fixed modifications: Propionamide (C) (apply to specified residues or termini only)

Ions Score: 47 Expect: 4e-005

Matches : 10/80 fragment ions using 11 most intense peaks ([help](#))

| #  | b                 | b <sup>++</sup>   | b <sup>0</sup> | b <sup>0++</sup> | Seq. | y                  | y <sup>++</sup> | y <sup>*</sup> | y <sup>*++</sup> | y <sup>0</sup> | y <sup>0++</sup>  | #  |
|----|-------------------|-------------------|----------------|------------------|------|--------------------|-----------------|----------------|------------------|----------------|-------------------|----|
| 1  | 114.091340        | 57.549308         |                |                  | L    |                    |                 |                |                  |                |                   | 11 |
| 2  | <b>227.175404</b> | 114.091340        |                |                  | I    | <b>1112.671409</b> | 556.839343      | 1095.644860    | 548.326068       | 1094.660844    | <b>547.834060</b> | 10 |
| 3  | <b>340.259468</b> | 170.633372        |                |                  | L    | <b>999.587345</b>  | 500.297311      | 982.560796     | 491.784036       | 981.576780     | 491.292028        | 9  |
| 4  | 437.312232        | 219.159754        |                |                  | P    | <b>886.503281</b>  | 443.755279      | 869.476732     | 435.242004       | 868.492716     | 434.749996        | 8  |
| 5  | 566.354825        | 283.681051        | 548.344260     | 274.675768       | E    | <b>789.450517</b>  | 395.228897      | 772.423968     | 386.715622       | 771.439952     | 386.223614        | 7  |
| 6  | 679.438889        | <b>340.223083</b> | 661.428324     | 331.217800       | L    | <b>660.407924</b>  | 330.707600      | 643.381375     | 322.194326       |                |                   | 6  |
| 7  | 736.460353        | 368.733815        | 718.449788     | 359.728532       | G    | <b>547.323860</b>  | 274.165568      | 530.297311     | 265.652294       |                |                   | 5  |
| 8  | 833.513117        | 417.260197        | 815.502552     | 408.254914       | P    | 490.302396         | 245.654836      | 473.275847     | 237.141562       |                |                   | 4  |
| 9  | 932.581531        | 466.794404        | 914.570966     | 457.789121       | V    | 393.249632         | 197.128454      | 376.223083     | 188.615180       |                |                   | 3  |
| 10 | 1079.649945       | 540.328611        | 1061.639380    | 531.323328       | F    | 294.181218         | 147.594247      | 277.154669     | 139.080973       |                |                   | 2  |
| 11 |                   |                   |                |                  | K    | 147.112804         | 74.060040       | 130.086255     | 65.546765        |                |                   | 1  |

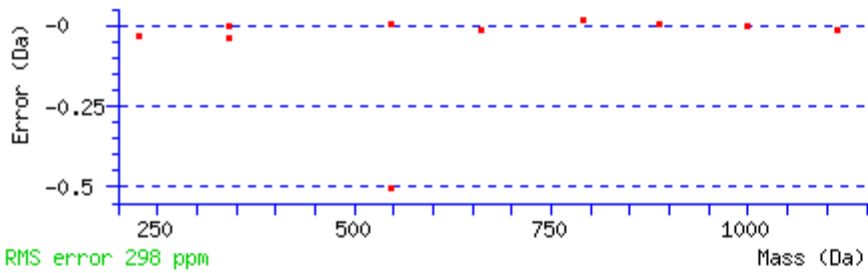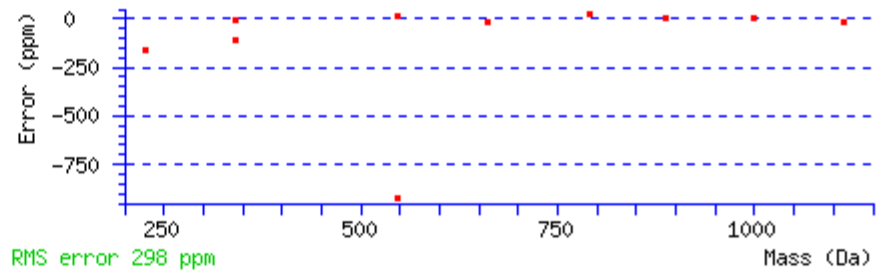

NCBI BLAST search of **LILPELGPVFK**

(Parameters: blastp, nr protein database, expect=20000, no filter, PAM30)

Other BLAST [web gateways](#)

## All matches to this query

| Score | Mr(calc):   | Delta     | Sequence                     |
|-------|-------------|-----------|------------------------------|
| 47.1  | 1224.748184 | 0.003704  | <a href="#">LILPELGPVFK</a>  |
| 14.7  | 1224.744171 | 0.007717  | <a href="#">LIPGATVGLLQK</a> |
| 12.9  | 1224.755386 | -0.003498 | <a href="#">LLLNLISQVGR</a>  |
| 12.9  | 1224.744141 | 0.007747  | <a href="#">LPLALNPLKSK</a>  |
| 12.9  | 1224.755386 | -0.003498 | <a href="#">LPLLTRLDLR</a>   |
| 10.7  | 1224.745499 | 0.006389  | <a href="#">LLPKHPLVR</a>    |
| 7.3   | 1224.744141 | 0.007747  | <a href="#">IPELVKQLSAK</a>  |
| 6.0   | 1224.744171 | 0.007717  | <a href="#">ILPVLGSQTGKI</a> |
| 0.2   | 1224.744141 | 0.007747  | <a href="#">LLELQELVLR</a>   |



# Mascot Search Results

## Peptide View

MS/MS Fragmentation of **SAWQTLNEFAR**

Found in **S23IP\_HUMAN**, SEC23-interacting protein OS=Homo sapiens GN=SEC23IP PE=1 SV=1

Match to Query 35666: 1321.643448 from(661.829000,2+) rtinseconds(3075) index(41590)

Title: Locus:1.1.1.2602.31

Data file 2011-11-14 - TFD - EP 7-1.mgf

Click mouse within plot area to zoom in by factor of two about that point

Or, Plot from  to  Da

Label all possible matches  Label matches used for scoring

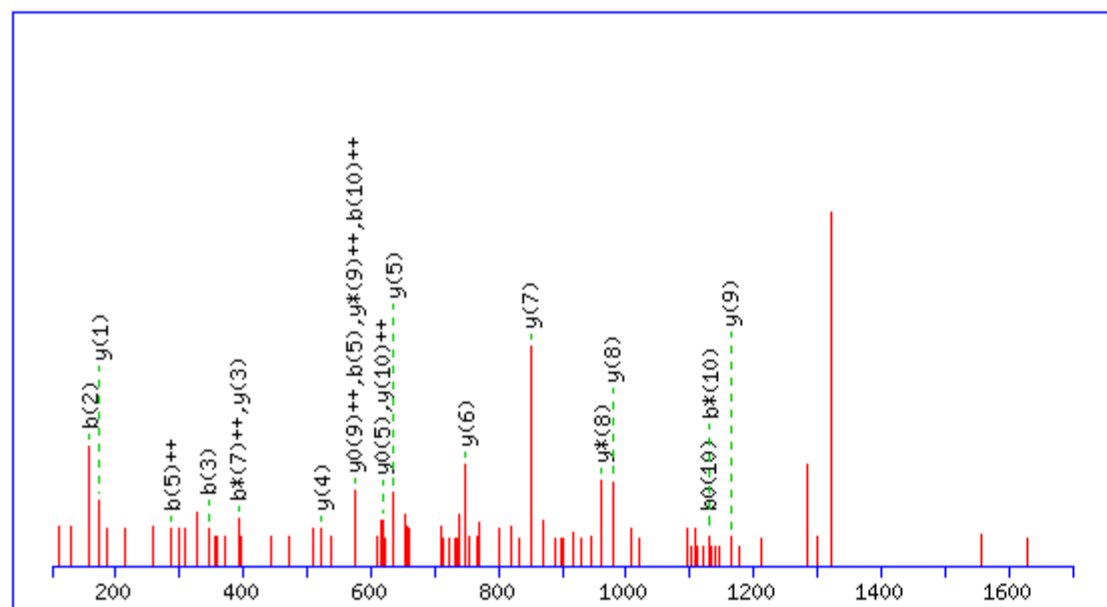

Monoisotopic mass of neutral peptide Mr(calc): 1321.641479

Fixed modifications: Propionamide (C) (apply to specified residues or termini only)

Ions Score: 45 Expect: 0.00038

Matches : 21/108 fragment ions using 35 most intense peaks [\(help\)](#)

| #  | b                 | b <sup>++</sup>   | b <sup>*</sup>     | b <sup>+++</sup>  | b <sup>0</sup>     | b <sup>0++</sup> | Seq. | y                  | y <sup>++</sup>   | y <sup>*</sup>    | y <sup>+++</sup>  | y <sup>0</sup>    | y <sup>0++</sup>  | #  |
|----|-------------------|-------------------|--------------------|-------------------|--------------------|------------------|------|--------------------|-------------------|-------------------|-------------------|-------------------|-------------------|----|
| 1  | 88.039304         | 44.523290         |                    |                   | 70.028739          | 35.518008        | S    |                    |                   |                   |                   |                   |                   | 11 |
| 2  | <b>159.076418</b> | 80.041847         |                    |                   | 141.065853         | 71.036564        | A    | 1235.616748        | <b>618.312012</b> | 1218.590199       | 609.798738        | 1217.606183       | 609.306729        | 10 |
| 3  | <b>345.155731</b> | 173.081504        |                    |                   | 327.145166         | 164.076221       | W    | <b>1164.579634</b> | 582.793455        | 1147.553085       | <b>574.280181</b> | 1146.569069       | <b>573.788172</b> | 9  |
| 4  | 473.214309        | 237.110793        | 456.187760         | 228.597518        | 455.203744         | 228.105510       | Q    | <b>978.500321</b>  | 489.753799        | <b>961.473772</b> | 481.240524        | 960.489756        | 480.748516        | 8  |
| 5  | <b>574.261988</b> | <b>287.634632</b> | 557.235439         | 279.121358        | 556.251423         | 278.629350       | T    | <b>850.441743</b>  | 425.724510        | 833.415194        | 417.211235        | 832.431178        | 416.719227        | 7  |
| 6  | 687.346052        | 344.176664        | 670.319503         | 335.663390        | 669.335487         | 335.171382       | L    | <b>749.394064</b>  | 375.200670        | 732.367515        | 366.687395        | 731.383499        | 366.195387        | 6  |
| 7  | 801.388979        | 401.198128        | 784.362430         | <b>392.684853</b> | 783.378414         | 392.192845       | N    | <b>636.310000</b>  | 318.658638        | 619.283451        | 310.145363        | <b>618.299435</b> | 309.653355        | 5  |
| 8  | 930.431572        | 465.719424        | 913.405023         | 457.206150        | 912.421007         | 456.714142       | E    | <b>522.267073</b>  | 261.637175        | 505.240524        | 253.123900        | 504.256508        | 252.631892        | 4  |
| 9  | 1077.499986       | 539.253631        | 1060.473437        | 530.740357        | 1059.489421        | 530.248349       | F    | <b>393.224480</b>  | 197.115878        | 376.197931        | 188.602603        |                   |                   | 3  |
| 10 | 1148.537100       | <b>574.772188</b> | <b>1131.510551</b> | 566.258914        | <b>1130.526535</b> | 565.766906       | A    | 246.156066         | 123.581671        | 229.129517        | 115.068396        |                   |                   | 2  |
| 11 |                   |                   |                    |                   |                    |                  | R    | <b>175.118952</b>  | 88.063114         | 158.092403        | 79.549839         |                   |                   | 1  |

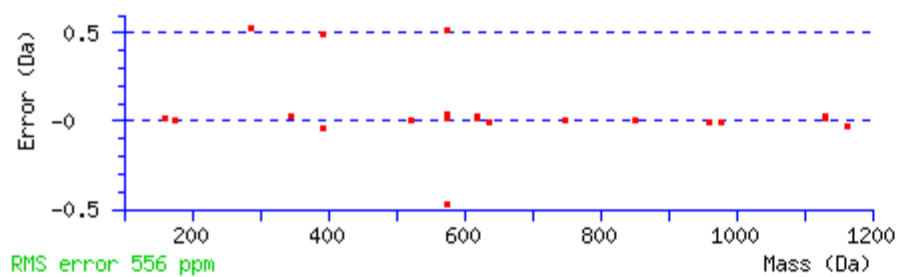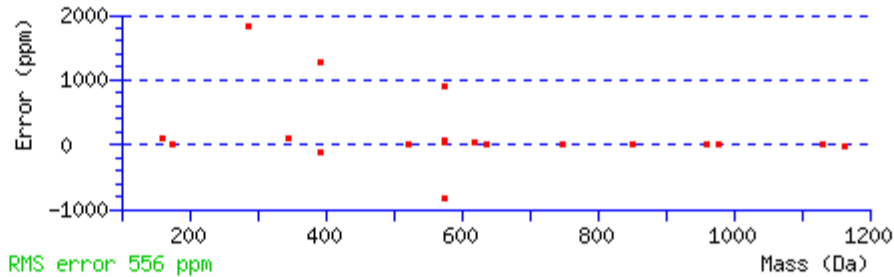

NCBI BLAST search of **SAWQTLNEFAR**

(Parameters: blastp, nr protein database, expect=20000, no filter, PAM30)

Other BLAST [web gateways](#)

All matches to this query

| Score | Mr(calc):   | Delta     | Sequence                    |
|-------|-------------|-----------|-----------------------------|
| 45.2  | 1321.641479 | 0.001969  | <a href="#">SAWQTLNEFAR</a> |
| 9.4   | 1321.648682 | -0.005234 | <a href="#">SNNQNVEPHKR</a> |

# Mascot Search Results

## Peptide View

MS/MS Fragmentation of **SSGFVHLLPDIAEPGSVAGR**

Found in **SHPK\_HUMAN**, Sedoheptulokinase OS=Homo sapiens GN=SHPK PE=1 SV=3

Match to Query 67937: 2105.092572 from(702.704800,3+) rtinseconds(3269) index(47074)

Title: Locus:1.1.1.2615.24

Data file 2011-11-12 - TFD - EP 6-3.mgf

Click mouse within plot area to zoom in by factor of two about that point

Or, Plot from  to  Da

Label all possible matches  Label matches used for scoring

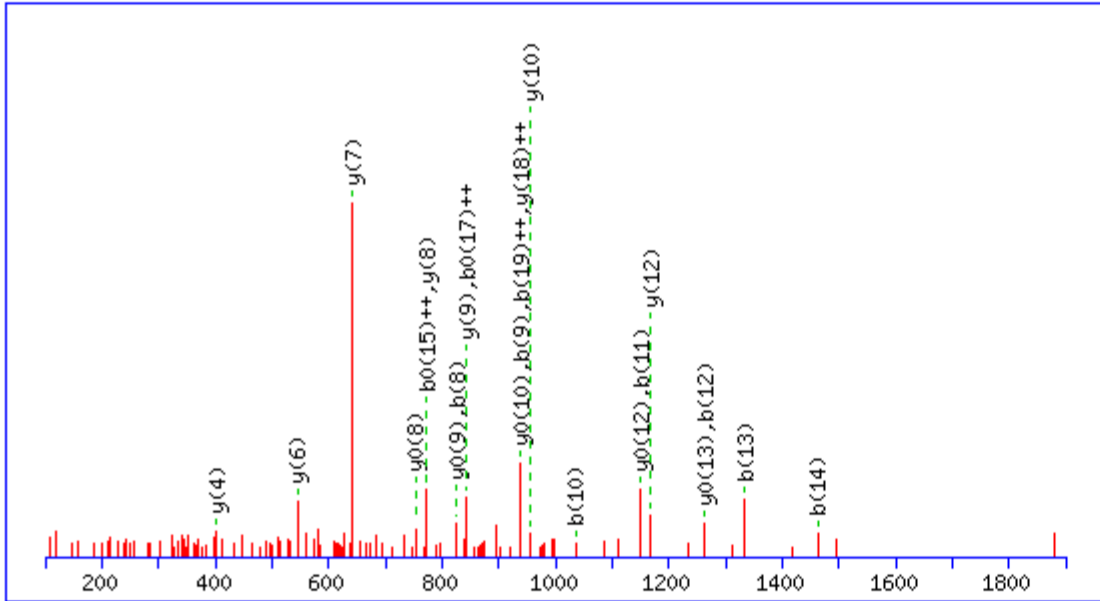

Monoisotopic mass of neutral peptide Mr(calc): 2105.090561

Fixed modifications: Propionamide (C) (apply to specified residues or termini only)

Ions Score: 39 Expect: 0.0014

Matches : 23/192 fragment ions using 29 most intense peaks ([help](#))

| #  | b           | b <sup>++</sup> | b <sup>0</sup> | b <sup>0++</sup> | Seq. | y           | y <sup>++</sup> | y <sup>*</sup> | y <sup>+++</sup> | y <sup>0</sup> | y <sup>0++</sup> | #  |
|----|-------------|-----------------|----------------|------------------|------|-------------|-----------------|----------------|------------------|----------------|------------------|----|
| 1  | 88.039304   | 44.523290       | 70.028739      | 35.518008        | S    |             |                 |                |                  |                |                  | 21 |
| 2  | 175.071332  | 88.039304       | 157.060767     | 79.034021        | S    | 2019.065802 | 1010.036539     | 2002.039253    | 1001.523265      | 2001.055237    | 1001.031256      | 20 |
| 3  | 232.092796  | 116.550036      | 214.082231     | 107.544753       | G    | 1932.033774 | 966.520525      | 1915.007225    | 958.007251       | 1914.023209    | 957.515243       | 19 |
| 4  | 379.161210  | 190.084243      | 361.150645     | 181.078960       | F    | 1875.012310 | 938.009793      | 1857.985761    | 929.496518       | 1857.001745    | 929.004510       | 18 |
| 5  | 476.213974  | 238.610625      | 458.203409     | 229.605342       | P    | 1727.943896 | 864.475586      | 1710.917347    | 855.962312       | 1709.933331    | 855.470304       | 17 |
| 6  | 575.282388  | 288.144832      | 557.271823     | 279.139549       | V    | 1630.891132 | 815.949204      | 1613.864583    | 807.435930       | 1612.880567    | 806.943921       | 16 |
| 7  | 712.341300  | 356.674288      | 694.330735     | 347.669005       | H    | 1531.822718 | 766.414997      | 1514.796169    | 757.901723       | 1513.812153    | 757.409715       | 15 |
| 8  | 825.425364  | 413.216320      | 807.414799     | 404.211037       | L    | 1394.763806 | 697.885541      | 1377.737257    | 689.372267       | 1376.753241    | 688.880259       | 14 |
| 9  | 938.509428  | 469.758352      | 920.498863     | 460.753069       | L    | 1281.679742 | 641.343509      | 1264.653193    | 632.830235       | 1263.669177    | 632.338227       | 13 |
| 10 | 1035.562192 | 518.284734      | 1017.551627    | 509.279451       | P    | 1168.595678 | 584.801477      | 1151.569129    | 576.288203       | 1150.585113    | 575.796194       | 12 |
| 11 | 1150.589135 | 575.798205      | 1132.578570    | 566.792923       | D    | 1071.542914 | 536.275095      | 1054.516365    | 527.761821       | 1053.532349    | 527.269813       | 11 |
| 12 | 1263.673199 | 632.340237      | 1245.662634    | 623.334955       | I    | 956.515971  | 478.761624      | 939.489422     | 470.248349       | 938.505406     | 469.756341       | 10 |
| 13 | 1334.710313 | 667.858794      | 1316.699748    | 658.853512       | A    | 843.431907  | 422.219592      | 826.405358     | 413.706317       | 825.421342     | 413.214309       | 9  |
| 14 | 1463.752906 | 732.380091      | 1445.742341    | 723.374808       | E    | 772.394793  | 386.701035      | 755.368244     | 378.187760       | 754.384228     | 377.695752       | 8  |
| 15 | 1560.805670 | 780.906473      | 1542.795105    | 771.901190       | P    | 643.352200  | 322.179738      | 626.325651     | 313.666464       | 625.341635     | 313.174456       | 7  |
| 16 | 1617.827134 | 809.417205      | 1599.816569    | 800.411922       | G    | 546.299436  | 273.653356      | 529.272887     | 265.140082       | 528.288871     | 264.648074       | 6  |
| 17 | 1704.859162 | 852.933219      | 1686.848597    | 843.927936       | S    | 489.277972  | 245.142624      | 472.251423     | 236.629349       | 471.267407     | 236.137341       | 5  |
| 18 | 1803.927576 | 902.467426      | 1785.917011    | 893.462144       | V    | 402.245944  | 201.626610      | 385.219395     | 193.113335       |                |                  | 4  |
| 19 | 1874.964690 | 937.985983      | 1856.954125    | 928.980701       | A    | 303.177530  | 152.092403      | 286.150981     | 143.579128       |                |                  | 3  |
| 20 | 1931.986154 | 966.496715      | 1913.975589    | 957.491432       | G    | 232.140416  | 116.573846      | 215.113867     | 108.060571       |                |                  | 2  |
| 21 |             |                 |                |                  | R    | 175.118952  | 88.063114       | 158.092403     | 79.549839        |                |                  | 1  |

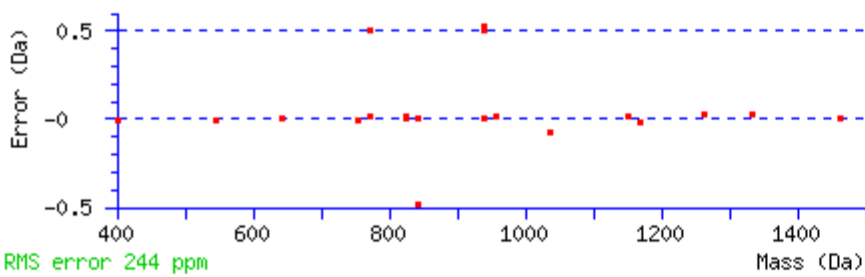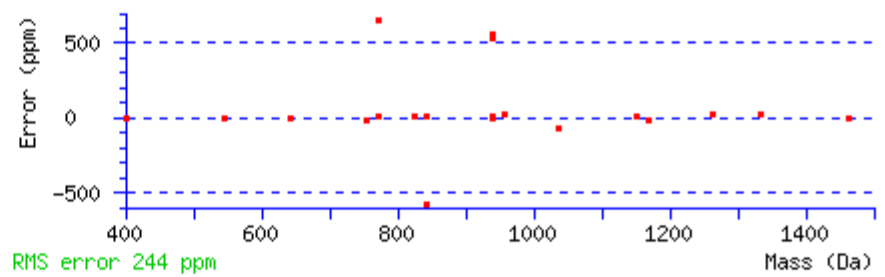

NCBI BLAST search of [SSGFVHLLPDIAEPGSVAGR](#)

(Parameters: blastp, nr protein database, expect=20000, no filter, PAM30)

Other BLAST [web gateways](#)

## All matches to this query

| Score | Mr(calc):   | Delta    | Sequence                             |
|-------|-------------|----------|--------------------------------------|
| 38.8  | 2105.090561 | 0.002011 | <a href="#">SSGFVHLLPDIAEPGSVAGR</a> |

Mascot: <http://www.matrixscience.com/>

# MASCOT Search Results

## Peptide View

MS/MS Fragmentation of **IEGENYLPQPIYR**

Found in **SELT\_HUMAN**, Selenoprotein T OS=Homo sapiens GN=SELT PE=2 SV=2

Match to Query 50511: 1590.806528 from(796.410540,2+) rtinseconds(2761) index(35091)

Title: Locus:1.1.1.2271.47

Data file 2011-11-12 - TFD - EP 5-6.mgf

Click mouse within plot area to zoom in by factor of two about that point

Or, Plot from  to  Da

Label all possible matches  Label matches used for scoring

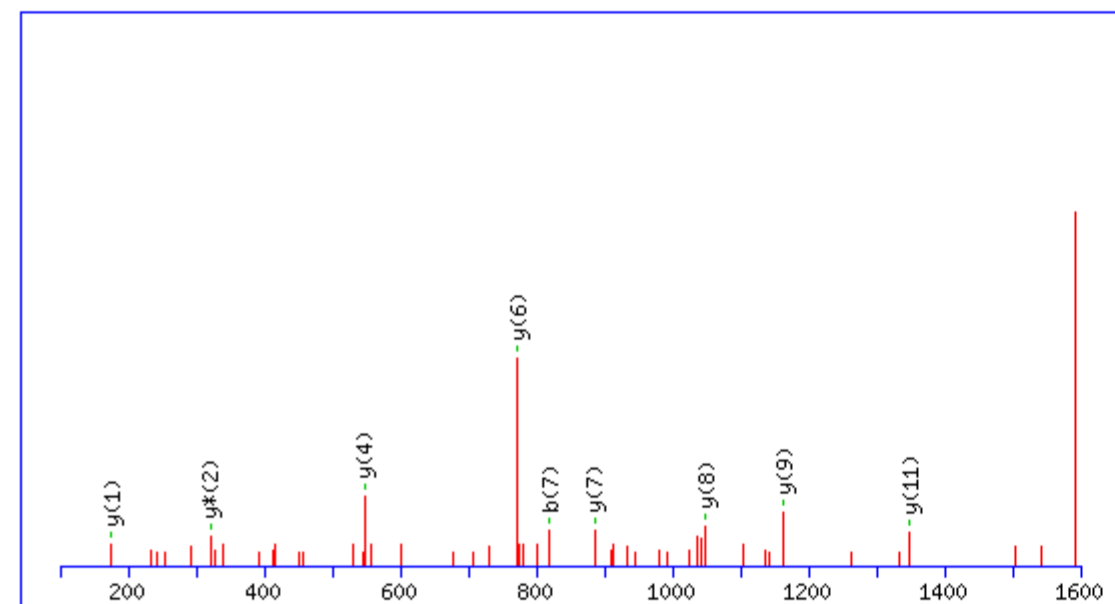

Monoisotopic mass of neutral peptide Mr(calc): 1590.804169

Fixed modifications: Propionamide (C) (apply to specified residues or termini only)

Ions Score: 48 Expect: 0.00019

Matches: 9/116 fragment ions using 13 most intense peaks [\(help\)](#)

| #  | b                 | b <sup>++</sup> | b <sup>*</sup> | b <sup>+++</sup> | b <sup>0</sup> | b <sup>0++</sup> | Seq. | y                  | y <sup>++</sup> | y <sup>*</sup>    | y <sup>+++</sup> | y <sup>0</sup> | y <sup>0++</sup> | #  |
|----|-------------------|-----------------|----------------|------------------|----------------|------------------|------|--------------------|-----------------|-------------------|------------------|----------------|------------------|----|
| 1  | 114.091340        | 57.549308       |                |                  |                |                  | I    |                    |                 |                   |                  |                |                  | 13 |
| 2  | 243.133933        | 122.070605      |                |                  | 225.123368     | 113.065322       | E    | 1478.727421        | 739.867349      | 1461.700872       | 731.354074       | 1460.716856    | 730.862066       | 12 |
| 3  | 300.155397        | 150.581336      |                |                  | 282.144832     | 141.576054       | G    | <b>1349.684828</b> | 675.346052      | 1332.658279       | 666.832778       | 1331.674263    | 666.340770       | 11 |
| 4  | 429.197990        | 215.102633      |                |                  | 411.187425     | 206.097351       | E    | 1292.663364        | 646.835320      | 1275.636815       | 638.322046       | 1274.652799    | 637.830038       | 10 |
| 5  | 543.240917        | 272.124097      | 526.214368     | 263.610822       | 525.230352     | 263.118814       | N    | <b>1163.620771</b> | 582.314024      | 1146.594222       | 573.800749       |                |                  | 9  |
| 6  | 706.304246        | 353.655761      | 689.277697     | 345.142487       | 688.293681     | 344.650479       | Y    | <b>1049.577844</b> | 525.292560      | 1032.551295       | 516.779286       |                |                  | 8  |
| 7  | <b>819.388310</b> | 410.197793      | 802.361761     | 401.684519       | 801.377745     | 401.192511       | L    | <b>886.514515</b>  | 443.760896      | 869.487966        | 435.247621       |                |                  | 7  |
| 8  | 916.441074        | 458.724175      | 899.414525     | 450.210901       | 898.430509     | 449.718893       | P    | <b>773.430451</b>  | 387.218864      | 756.403902        | 378.705589       |                |                  | 6  |
| 9  | 1044.499652       | 522.753464      | 1027.473103    | 514.240190       | 1026.489087    | 513.748182       | Q    | 676.377687         | 338.692482      | 659.351138        | 330.179207       |                |                  | 5  |
| 10 | 1141.552416       | 571.279846      | 1124.525867    | 562.766572       | 1123.541851    | 562.274564       | P    | <b>548.319109</b>  | 274.663193      | 531.292560        | 266.149918       |                |                  | 4  |
| 11 | 1254.636480       | 627.821878      | 1237.609931    | 619.308604       | 1236.625915    | 618.816596       | I    | 451.266345         | 226.136810      | 434.239796        | 217.623536       |                |                  | 3  |
| 12 | 1417.699809       | 709.353543      | 1400.673260    | 700.840268       | 1399.689244    | 700.348260       | Y    | 338.182281         | 169.594778      | <b>321.155732</b> | 161.081504       |                |                  | 2  |
| 13 |                   |                 |                |                  |                |                  | R    | <b>175.118952</b>  | 88.063114       | 158.092403        | 79.549839        |                |                  | 1  |

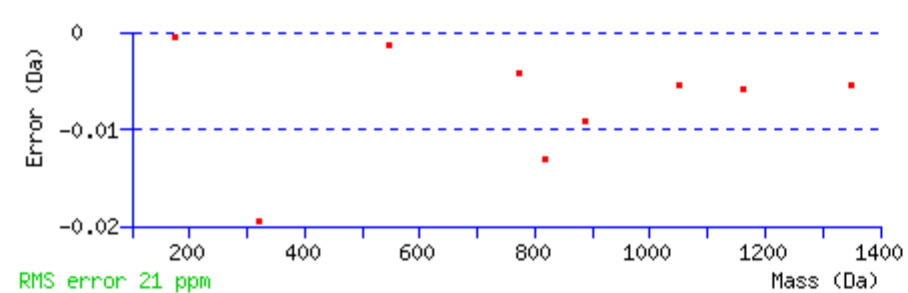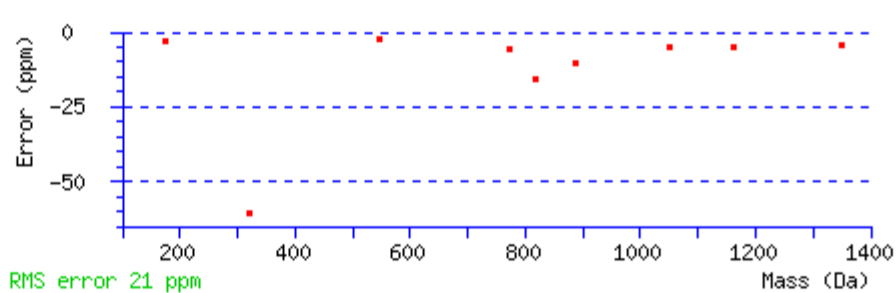

NCBI BLAST search of **IEGENYLPQPIYR**

(Parameters: blastp, nr protein database, expect=20000, no filter, PAM30)

Other BLAST [web gateways](#)

## All matches to this query

| Score | Mr(calc):   | Delta     | Sequence                          |
|-------|-------------|-----------|-----------------------------------|
| 48.0  | 1590.804169 | 0.002359  | <a href="#">IEGENYLPQPIYR</a>     |
| 9.3   | 1590.792313 | 0.014215  | <a href="#">VVETMQSTLDAEIR</a>    |
| 7.0   | 1590.807587 | -0.001059 | <a href="#">KTGFPEIIMP GDVR</a>   |
| 6.0   | 1590.797501 | 0.009027  | <a href="#">AQARLPHSGGPAAGGGR</a> |
| 4.6   | 1590.807587 | -0.001059 | <a href="#">KEDMPSVWVVTIR</a>     |
| 2.2   | 1590.810928 | -0.004400 | <a href="#">LTIQMMSPLQIER</a>     |
| 2.2   | 1590.810928 | -0.004400 | <a href="#">LTIQMMSPLQIER</a>     |
| 2.2   | 1590.804184 | 0.002344  | <a href="#">ETPLHQLYSAAFSK</a>    |

# MASCOT Search Results

## Peptide View

MS/MS Fragmentation of **VNIPIIAK**

Found in **SEPI1\_HUMAN**, Septin-11 OS=Homo sapiens GN=SEPT11 PE=1 SV=3

Match to Query 12810: 979.640968 from(490.827760,2+) rtinseconds(2837) index(38561)  
 Title: Locus:1.1.1.2502.7  
 Data file 2011-11-14 - TFD - EP 8-3.mgf

Click mouse within plot area to zoom in by factor of two about that point

Or, Plot from  to  Da

Label all possible matches  Label matches used for scoring

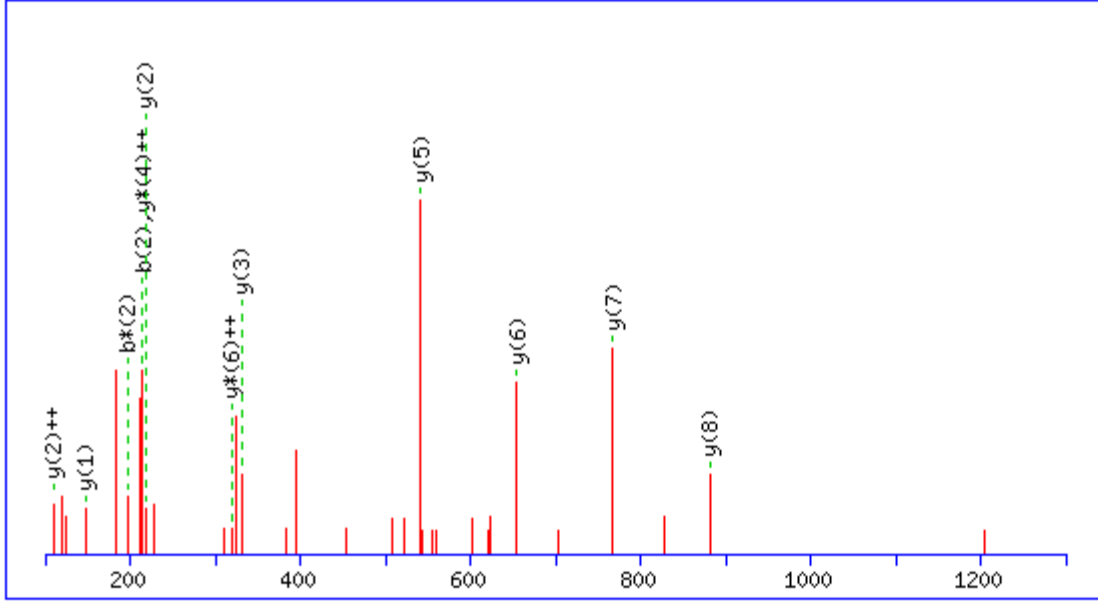

Monoisotopic mass of neutral peptide Mr(calc): 979.642975  
 Fixed modifications: Propionamide (C) (apply to specified residues or termini only)  
 Ions Score: 35 Expect: 0.0003  
 Matches : 12/62 fragment ions using 29 most intense peaks ([help](#))

| # | b          | b <sup>++</sup> | b <sup>*</sup> | b <sup>+++</sup> | Seq. | y          | y <sup>++</sup> | y <sup>*</sup> | y <sup>+++</sup> | # |
|---|------------|-----------------|----------------|------------------|------|------------|-----------------|----------------|------------------|---|
| 1 | 100.075690 | 50.541483       |                |                  | V    |            |                 |                |                  | 9 |
| 2 | 214.118617 | 107.562947      | 197.092068     | 99.049672        | N    | 881.581865 | 441.294571      | 864.555316     | 432.781296       | 8 |
| 3 | 327.202681 | 164.104978      | 310.176132     | 155.591704       | I    | 767.538938 | 384.273107      | 750.512389     | 375.759833       | 7 |
| 4 | 440.286745 | 220.647010      | 423.260196     | 212.133736       | I    | 654.454874 | 327.731075      | 637.428325     | 319.217801       | 6 |
| 5 | 537.339509 | 269.173393      | 520.312960     | 260.660118       | P    | 541.370810 | 271.189043      | 524.344261     | 262.675769       | 5 |
| 6 | 650.423573 | 325.715425      | 633.397024     | 317.202150       | I    | 444.318046 | 222.662661      | 427.291497     | 214.149386       | 4 |
| 7 | 763.507637 | 382.257457      | 746.481088     | 373.744182       | I    | 331.233982 | 166.120629      | 314.207433     | 157.607354       | 3 |
| 8 | 834.544751 | 417.776014      | 817.518202     | 409.262739       | A    | 218.149918 | 109.578597      | 201.123369     | 101.065322       | 2 |
| 9 |            |                 |                |                  | K    | 147.112804 | 74.060040       | 130.086255     | 65.546765        | 1 |

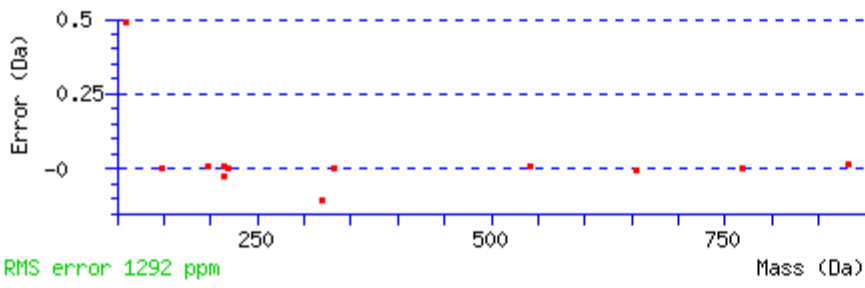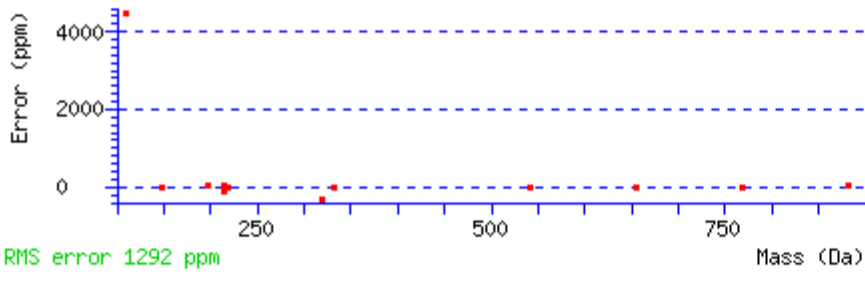

NCBI BLAST search of [VNIPIIAK](#)  
 (Parameters: blastp, nr protein database, expect=20000, no filter, PAM30)  
 Other BLAST [web gateways](#)

## All matches to this query

| Score | Mr(calc):  | Delta     | Sequence                 |
|-------|------------|-----------|--------------------------|
| 35.3  | 979.642975 | -0.002007 | <a href="#">VNIPIIAK</a> |
| 35.3  | 979.642975 | -0.002007 | <a href="#">VNIPLIAK</a> |

# MASCOT SCIENCE Mascot Search Results

## Peptide View

MS/MS Fragmentation of **LGTPALTSR**

Found in **GLYC\_HUMAN**, Serine hydroxymethyltransferase, cytosolic OS=Homo sapiens GN=SHMT1 PE=1 SV=1

Match to Query 4628: 914.511268 from(458.262910,2+) rtinseconds(1328) index(9972)

Title: Locus:1.1.1.889.13

Data file 2012-01-27 - TFD - Epitel - IEC - 10ul - 2.mgf

Click mouse within plot area to zoom in by factor of two about that point

Or, Plot from  to  Da

Label all possible matches  Label matches used for scoring

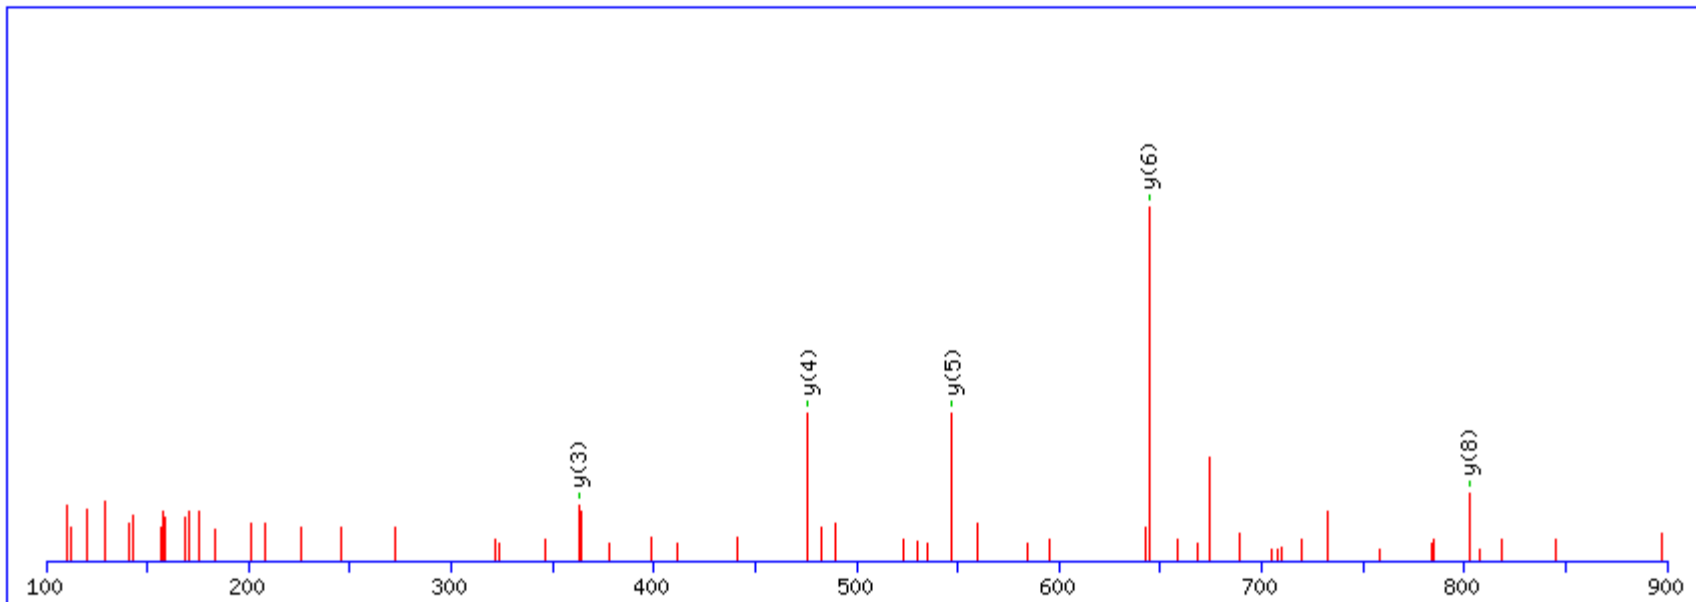

Monoisotopic mass of neutral peptide Mr(calc): 914.518524

Fixed modifications: Carbamidomethyl (C) (apply to specified residues or termini only)

Ions Score: 41 Expect: 0.0018

Matches : 5/74 fragment ions using 8 most intense peaks [\(help\)](#)

| # | b          | b <sup>++</sup> | b <sup>0</sup> | b <sup>0++</sup> | Seq. | y          | y <sup>++</sup> | y <sup>*</sup> | y <sup>+++</sup> | y <sup>0</sup> | y <sup>0++</sup> | # |
|---|------------|-----------------|----------------|------------------|------|------------|-----------------|----------------|------------------|----------------|------------------|---|
| 1 | 114.091340 | 57.549308       |                |                  | L    |            |                 |                |                  |                |                  | 9 |
| 2 | 171.112804 | 86.060040       |                |                  | G    | 802.441744 | 401.724510      | 785.415195     | 393.211236       | 784.431179     | 392.719228       | 8 |
| 3 | 272.160483 | 136.583879      | 254.149918     | 127.578597       | T    | 745.420280 | 373.213778      | 728.393731     | 364.700504       | 727.409715     | 364.208496       | 7 |
| 4 | 369.213247 | 185.110261      | 351.202682     | 176.104979       | P    | 644.372601 | 322.689939      | 627.346052     | 314.176664       | 626.362036     | 313.684656       | 6 |
| 5 | 440.250361 | 220.628818      | 422.239796     | 211.623536       | A    | 547.319837 | 274.163557      | 530.293288     | 265.650282       | 529.309272     | 265.158274       | 5 |
| 6 | 553.334425 | 277.170851      | 535.323860     | 268.165568       | L    | 476.282723 | 238.645000      | 459.256174     | 230.131725       | 458.272158     | 229.639717       | 4 |
| 7 | 654.382104 | 327.694690      | 636.371539     | 318.689408       | T    | 363.198659 | 182.102968      | 346.172110     | 173.589693       | 345.188094     | 173.097685       | 3 |
| 8 | 741.414132 | 371.210704      | 723.403567     | 362.205422       | S    | 262.150980 | 131.579128      | 245.124431     | 123.065854       | 244.140415     | 122.573846       | 2 |
| 9 |            |                 |                |                  | R    | 175.118952 | 88.063114       | 158.092403     | 79.549840        |                |                  | 1 |

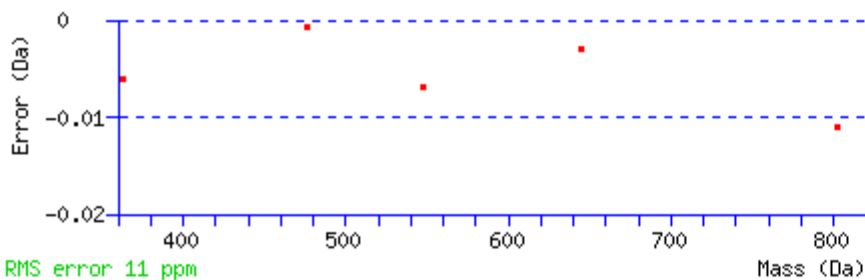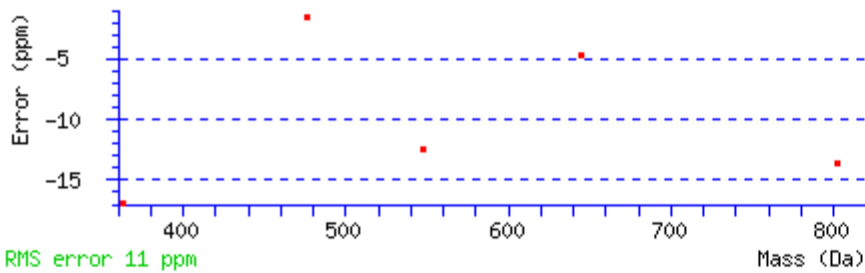

NCBI BLAST search of **LGTPALTSR**

(Parameters: blastp, nr protein database, expect=20000, no filter, PAM30)

Other BLAST [web gateways](#)

## All matches to this query

| Score | Mr(calc):  | Delta     | Sequence                  |
|-------|------------|-----------|---------------------------|
| 40.8  | 914.518524 | -0.007256 | <a href="#">LGTPALTSR</a> |
| 13.1  | 914.518509 | -0.007241 | <a href="#">LRPGLSEK</a>  |
| 5.5   | 914.508621 | 0.002647  | <a href="#">HPALQPPR</a>  |
| 5.5   | 914.508606 | 0.002662  | <a href="#">RNIYPPR</a>   |
| 5.5   | 914.519836 | -0.008568 | <a href="#">YRARPPR</a>   |
| 4.8   | 914.518524 | -0.007256 | <a href="#">LEGGTVLAR</a> |
| 4.6   | 914.507309 | 0.003959  | <a href="#">ATVTPSPVK</a> |
| 4.6   | 914.507309 | 0.003959  | <a href="#">ATVTPSPVK</a> |
| 4.0   | 914.508621 | 0.002647  | <a href="#">IPFNRPR</a>   |
| 2.0   | 914.508621 | 0.002647  | <a href="#">IKFQSHR</a>   |

# MASCOT SCIENCE Mascot Search Results

## Peptide View

MS/MS Fragmentation of **HADIVTTTHK**

Found in **GLYM\_HUMAN**, Serine hydroxymethyltransferase, mitochondrial OS=Homo sapiens GN=SHMT2 PE=1 SV=3

Match to Query 548318: 1222.633842 from(408.551890,3+) rtinseconds(811) index(656767)

Title: Locus:1.1.1.972.2

Data file C:\Program Files (x86)\Matrix Science\Mascot Daemon\mgf3 TFD - Epitel - R2\mascot\_daemon\_merge.mgf

Click mouse within plot area to zoom in by factor of two about that point

Or, Plot from  to  Da

Label all possible matches  Label matches used for scoring

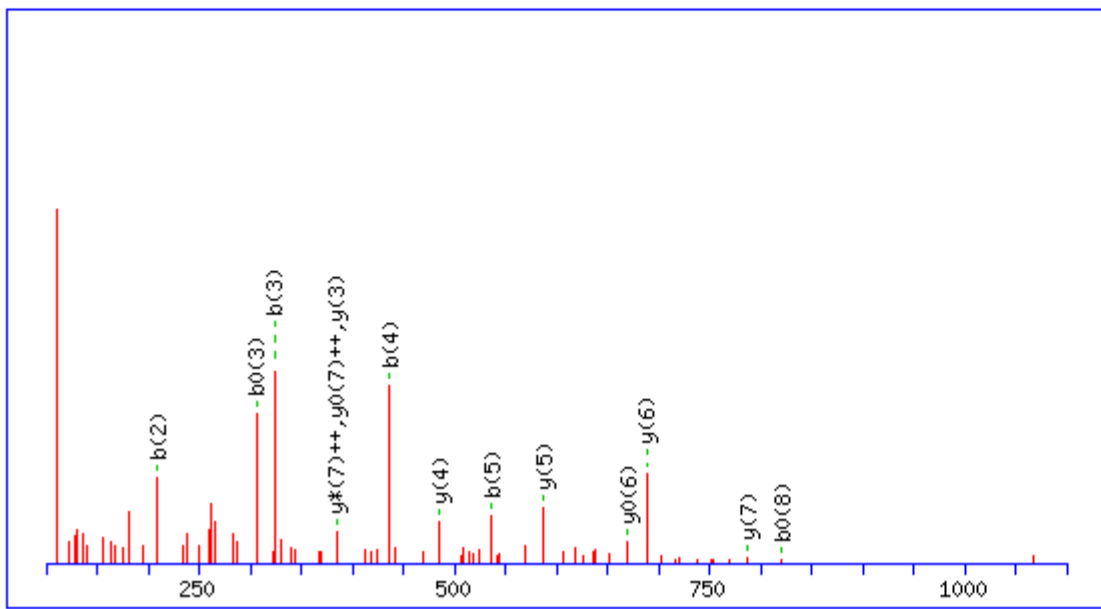

Monoisotopic mass of neutral peptide Mr(calc): 1222.630615

Fixed modifications: Carbamidomethyl (C) (apply to specified residues or termini only)

Ions Score: 41 Expect: 0.00067

Matches : 14/92 fragment ions using 16 most intense peaks ([help](#))

| #  | b                 | b <sup>++</sup> | b <sup>0</sup>    | b <sup>0++</sup> | Seq. | y                 | y <sup>++</sup> | y <sup>*</sup> | y <sup>*++</sup>  | y <sup>0</sup>    | y <sup>0++</sup>  | #  |
|----|-------------------|-----------------|-------------------|------------------|------|-------------------|-----------------|----------------|-------------------|-------------------|-------------------|----|
| 1  | 138.066188        | 69.536732       |                   |                  | H    |                   |                 |                |                   |                   |                   | 11 |
| 2  | <b>209.103302</b> | 105.055289      |                   |                  | A    | 1086.578967       | 543.793122      | 1069.552418    | 535.279847        | 1068.568402       | 534.787839        | 10 |
| 3  | <b>324.130245</b> | 162.568761      | <b>306.119680</b> | 153.563478       | D    | 1015.541853       | 508.274565      | 998.515304     | 499.761290        | 997.531288        | 499.269282        | 9  |
| 4  | <b>437.214309</b> | 219.110793      | 419.203744        | 210.105510       | I    | 900.514910        | 450.761093      | 883.488361     | 442.247819        | 882.504345        | 441.755811        | 8  |
| 5  | <b>536.282723</b> | 268.645000      | 518.272158        | 259.639717       | V    | <b>787.430846</b> | 394.219061      | 770.404297     | <b>385.705787</b> | 769.420281        | <b>385.213779</b> | 7  |
| 6  | 637.330402        | 319.168839      | 619.319837        | 310.163557       | T    | <b>688.362432</b> | 344.684854      | 671.335883     | 336.171580        | <b>670.351867</b> | 335.679572        | 6  |
| 7  | 738.378081        | 369.692679      | 720.367516        | 360.687396       | T    | <b>587.314753</b> | 294.161015      | 570.288204     | 285.647740        | 569.304188        | 285.155732        | 5  |
| 8  | 839.425760        | 420.216518      | <b>821.415195</b> | 411.211236       | T    | <b>486.267074</b> | 243.637175      | 469.240525     | 235.123900        | 468.256509        | 234.631892        | 4  |
| 9  | 940.473439        | 470.740358      | 922.462874        | 461.735075       | T    | <b>385.219395</b> | 193.113335      | 368.192846     | 184.600061        | 367.208830        | 184.108053        | 3  |
| 10 | 1077.532351       | 539.269814      | 1059.521786       | 530.264531       | H    | 284.171716        | 142.589496      | 267.145167     | 134.076221        |                   |                   | 2  |
| 11 |                   |                 |                   |                  | K    | 147.112804        | 74.060040       | 130.086255     | 65.546765         |                   |                   | 1  |

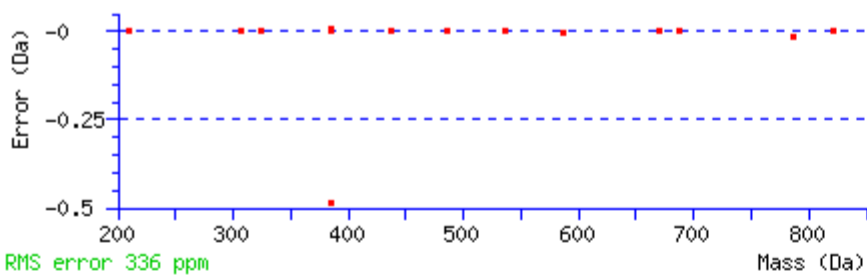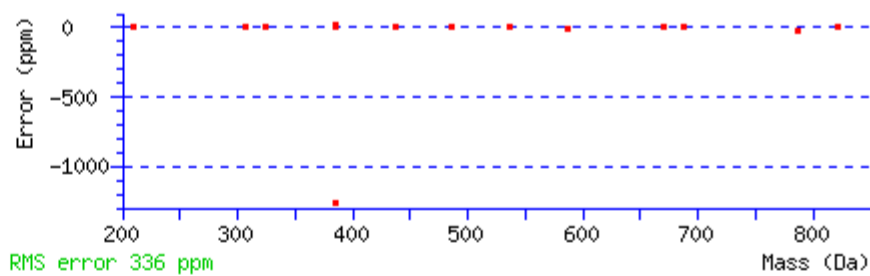

NCBI BLAST search of **HADIVTTTHK**

(Parameters: blastp, nr protein database, expect=20000, no filter, PAM30)

Other BLAST [web gateways](#)

All matches to this query

| Score | Mr(calc):   | Delta     | Sequence                      |
|-------|-------------|-----------|-------------------------------|
| 40.6  | 1222.630615 | 0.003227  | <a href="#">HADIVTTTHK</a>    |
| 6.3   | 1222.630585 | 0.003257  | <a href="#">STKPGAAPTEHK</a>  |
| 3.1   | 1222.626755 | 0.007087  | <a href="#">NIFISPVSISM</a>   |
| 1.3   | 1222.630600 | 0.003242  | <a href="#">AGPGPGAVLESPR</a> |
| 0.7   | 1222.637970 | -0.004128 | <a href="#">IPEPVKNQAPM</a>   |
| 0.3   | 1222.624054 | 0.009788  | <a href="#">AATIHHRLASM</a>   |
| 0.3   | 1222.645844 | -0.012002 | <a href="#">DAHPKLHVYK</a>    |

Mascot: <http://www.matrixscience.com/>

# Mascot Search Results

## Peptide View

MS/MS Fragmentation of **NTGTICPLPELVK**

Found in **SPTC1\_HUMAN**, Serine palmitoyltransferase 1 OS=Homo sapiens GN=SPTLC1 PE=1 SV=1

Match to Query 786598: 1440.763308 from(721.388930,2+) rtinseconds(2834) index(691587)

Title: Locus:1.1.1.1749.35

Data file C:\Program Files (x86)\Matrix Science\Mascot Daemon\mgf3 TFD - Epitel - R2\mascot\_daemon\_merge.mgf

Click mouse within plot area to zoom in by factor of two about that point

Or, Plot from  to  Da

Label all possible matches  Label matches used for scoring

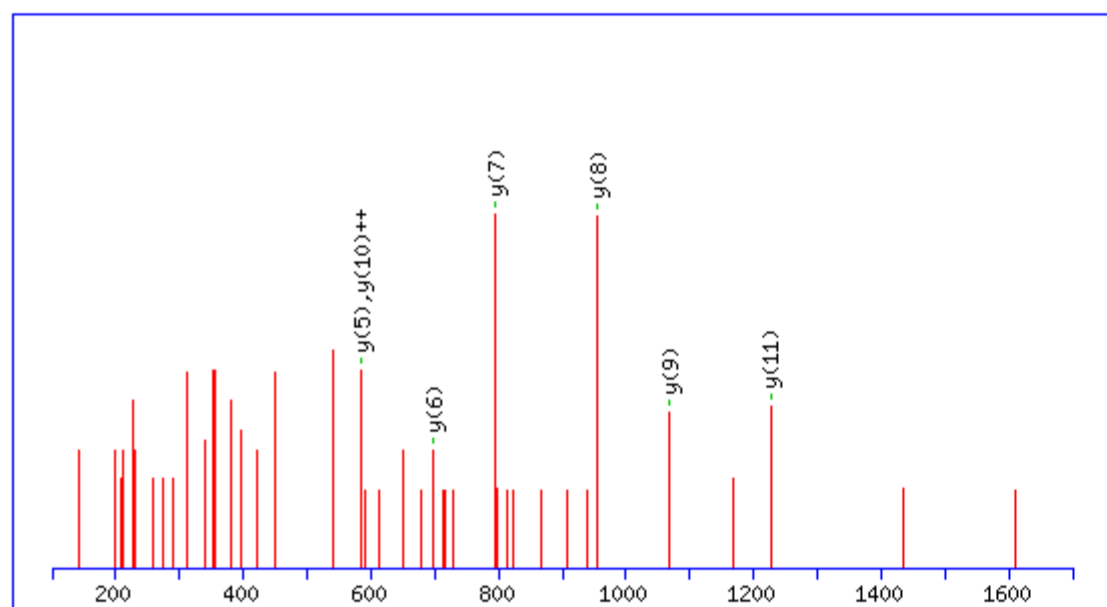

Monoisotopic mass of neutral peptide Mr(calc): 1440.764648

Fixed modifications: Carbamidomethyl (C) (apply to specified residues or termini only)

Ions Score: 34 Expect: 0.00068

Matches : 7/136 fragment ions using 12 most intense peaks ([help](#))

| #  | b           | b <sup>++</sup> | b <sup>*</sup> | b <sup>*++</sup> | b <sup>0</sup> | b <sup>0++</sup> | Seq. | y                  | y <sup>++</sup>   | y <sup>*</sup> | y <sup>*++</sup> | y <sup>0</sup> | y <sup>0++</sup> | #  |
|----|-------------|-----------------|----------------|------------------|----------------|------------------|------|--------------------|-------------------|----------------|------------------|----------------|------------------|----|
| 1  | 115.050203  | 58.028740       | 98.023654      | 49.515465        |                |                  | N    |                    |                   |                |                  |                |                  | 13 |
| 2  | 216.097882  | 108.552579      | 199.071333     | 100.039305       | 198.087317     | 99.547296        | T    | 1327.729002        | 664.368139        | 1310.702453    | 655.854865       | 1309.718437    | 655.362857       | 12 |
| 3  | 273.119346  | 137.063311      | 256.092797     | 128.550037       | 255.108781     | 128.058029       | G    | <b>1226.681323</b> | 613.844300        | 1209.654774    | 605.331025       | 1208.670758    | 604.839017       | 11 |
| 4  | 374.167025  | 187.587151      | 357.140476     | 179.073876       | 356.156460     | 178.581868       | T    | 1169.659859        | <b>585.333568</b> | 1152.633310    | 576.820293       | 1151.649294    | 576.328285       | 10 |
| 5  | 487.251089  | 244.129183      | 470.224540     | 235.615908       | 469.240524     | 235.123900       | I    | <b>1068.612180</b> | 534.809728        | 1051.585631    | 526.296454       | 1050.601615    | 525.804446       | 9  |
| 6  | 647.281738  | 324.144507      | 630.255189     | 315.631233       | 629.271173     | 315.139225       | C    | <b>955.528116</b>  | 478.267696        | 938.501567     | 469.754422       | 937.517551     | 469.262414       | 8  |
| 7  | 744.334502  | 372.670889      | 727.307953     | 364.157615       | 726.323937     | 363.665607       | P    | <b>795.497467</b>  | 398.252372        | 778.470918     | 389.739097       | 777.486902     | 389.247089       | 7  |
| 8  | 857.418566  | 429.212921      | 840.392017     | 420.699647       | 839.408001     | 420.207639       | L    | <b>698.444703</b>  | 349.725990        | 681.418154     | 341.212715       | 680.434138     | 340.720707       | 6  |
| 9  | 954.471330  | 477.739303      | 937.444781     | 469.226029       | 936.460765     | 468.734021       | P    | <b>585.360639</b>  | 293.183958        | 568.334090     | 284.670683       | 567.350074     | 284.178675       | 5  |
| 10 | 1083.513923 | 542.260600      | 1066.487374    | 533.747325       | 1065.503358    | 533.255317       | E    | 488.307875         | 244.657575        | 471.281326     | 236.144301       | 470.297310     | 235.652293       | 4  |
| 11 | 1196.597987 | 598.802632      | 1179.571438    | 590.289357       | 1178.587422    | 589.797349       | L    | 359.265282         | 180.136279        | 342.238733     | 171.623004       |                |                  | 3  |
| 12 | 1295.666401 | 648.336839      | 1278.639852    | 639.823564       | 1277.655836    | 639.331556       | V    | 246.181218         | 123.594247        | 229.154669     | 115.080973       |                |                  | 2  |
| 13 |             |                 |                |                  |                |                  | K    | 147.112804         | 74.060040         | 130.086255     | 65.546765        |                |                  | 1  |

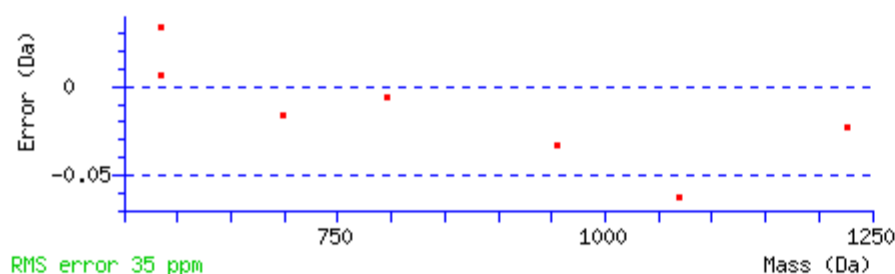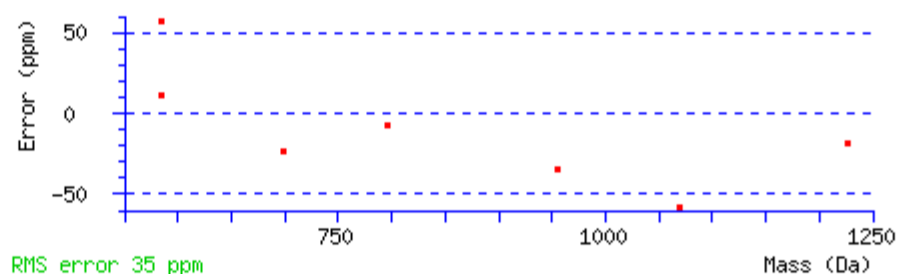

NCBI BLAST search of **NTGTICPLPELVK**

(Parameters: blastp, nr protein database, expect=20000, no filter, PAM30)

Other BLAST [web gateways](#)

All matches to this query

| Score | Mr(calc):   | Delta     | Sequence                      |
|-------|-------------|-----------|-------------------------------|
| 33.9  | 1440.764648 | -0.001340 | <a href="#">NTGTICPLPELVK</a> |
| 0.2   | 1440.764648 | -0.001340 | <a href="#">ELGVKPSQQPVLV</a> |

Mascot: <http://www.matrixscience.com/>

# MASCOT Search Results

## Peptide View

MS/MS Fragmentation of **DSIHLTPVLTSSILNQLTGR**

Found in **SRR\_HUMAN**, Serine racemase OS=Homo sapiens GN=SRR PE=1 SV=1

Match to Query 68232: 2164.185282 from(722.402370,3+) rtinseconds(4063) index(61569)

Title: Locus:1.1.1.2836.22

Data file 2011-11-12 - TFD - EP 6-4.mgf

Click mouse within plot area to zoom in by factor of two about that point

Or, Plot from  to  Da

Label all possible matches  Label matches used for scoring

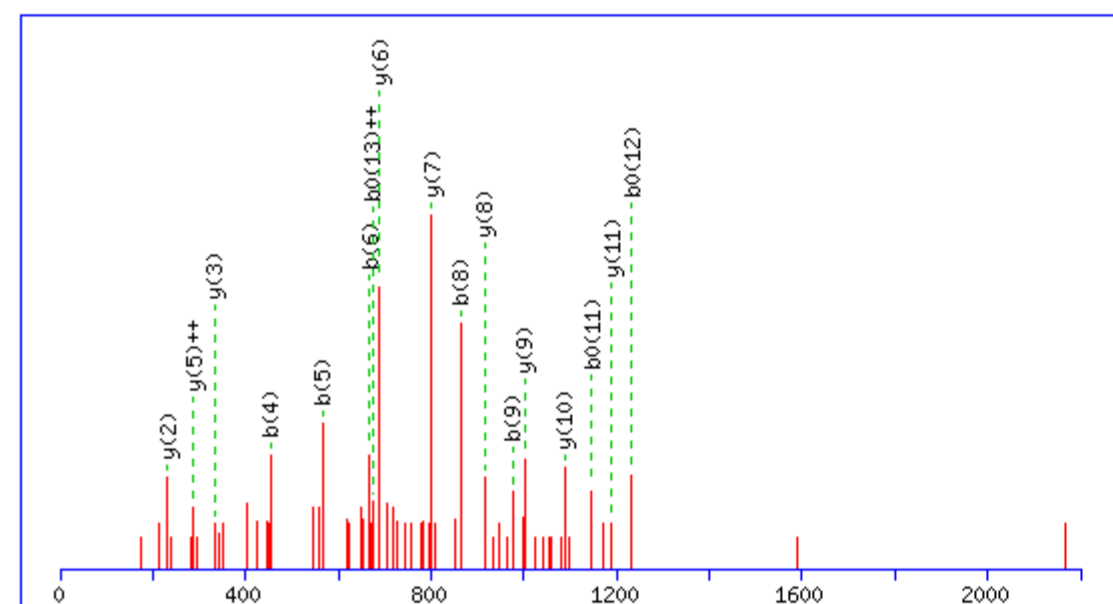

Monoisotopic mass of neutral peptide Mr(calc): 2164.185181

Fixed modifications: Propionamide (C) (apply to specified residues or termini only)

Ions Score: 61 Expect: 3.5e-006

Matches : 17/196 fragment ions using 23 most intense peaks [\(help\)](#)

| #  | b                 | b <sup>++</sup> | b <sup>*</sup> | b <sup>*++</sup> | b <sup>0</sup>     | b <sup>0++</sup>  | Seq. | y                  | y <sup>++</sup>   | y <sup>*</sup> | y <sup>*++</sup> | y <sup>0</sup> | y <sup>0++</sup> | #  |
|----|-------------------|-----------------|----------------|------------------|--------------------|-------------------|------|--------------------|-------------------|----------------|------------------|----------------|------------------|----|
| 1  | 116.034219        | 58.520748       |                |                  | 98.023654          | 49.515465         | D    |                    |                   |                |                  |                |                  | 20 |
| 2  | 203.066247        | 102.036761      |                |                  | 185.055682         | 93.031479         | S    | 2050.165516        | 1025.586396       | 2033.138967    | 1017.073121      | 2032.154951    | 1016.581113      | 19 |
| 3  | 316.150311        | 158.578793      |                |                  | 298.139746         | 149.573511        | I    | 1963.133488        | 982.070382        | 1946.106939    | 973.557107       | 1945.122923    | 973.065099       | 18 |
| 4  | <b>453.209223</b> | 227.108250      |                |                  | 435.198658         | 218.102967        | H    | 1850.049424        | 925.528350        | 1833.022875    | 917.015075       | 1832.038859    | 916.523067       | 17 |
| 5  | <b>566.293287</b> | 283.650282      |                |                  | 548.282722         | 274.644999        | L    | 1712.990512        | 856.998894        | 1695.963963    | 848.485619       | 1694.979947    | 847.993611       | 16 |
| 6  | <b>667.340966</b> | 334.174121      |                |                  | 649.330401         | 325.168839        | T    | 1599.906448        | 800.456862        | 1582.879899    | 791.943587       | 1581.895883    | 791.451579       | 15 |
| 7  | 764.393730        | 382.700503      |                |                  | 746.383165         | 373.695221        | P    | 1498.858769        | 749.933022        | 1481.832220    | 741.419748       | 1480.848204    | 740.927740       | 14 |
| 8  | <b>863.462144</b> | 432.234710      |                |                  | 845.451579         | 423.229428        | V    | 1401.806005        | 701.406640        | 1384.779456    | 692.893366       | 1383.795440    | 692.401358       | 13 |
| 9  | <b>976.546208</b> | 488.776742      |                |                  | 958.535643         | 479.771460        | L    | 1302.737591        | 651.872433        | 1285.711042    | 643.359159       | 1284.727026    | 642.867151       | 12 |
| 10 | 1077.593887       | 539.300582      |                |                  | 1059.583322        | 530.295299        | T    | <b>1189.653527</b> | 595.330401        | 1172.626978    | 586.817127       | 1171.642962    | 586.325119       | 11 |
| 11 | 1164.625915       | 582.816596      |                |                  | <b>1146.615350</b> | 573.811313        | S    | <b>1088.605848</b> | 544.806562        | 1071.579299    | 536.293287       | 1070.595283    | 535.801279       | 10 |
| 12 | 1251.657943       | 626.332610      |                |                  | <b>1233.647378</b> | 617.327327        | S    | <b>1001.573820</b> | 501.290548        | 984.547271     | 492.777273       | 983.563255     | 492.285265       | 9  |
| 13 | 1364.742007       | 682.874642      |                |                  | 1346.731442        | <b>673.869359</b> | I    | <b>914.541792</b>  | 457.774534        | 897.515243     | 449.261259       | 896.531227     | 448.769251       | 8  |
| 14 | 1477.826071       | 739.416674      |                |                  | 1459.815506        | 730.411391        | L    | <b>801.457728</b>  | 401.232502        | 784.431179     | 392.719227       | 783.447163     | 392.227219       | 7  |
| 15 | 1591.868998       | 796.438137      | 1574.842449    | 787.924863       | 1573.858433        | 787.432854        | N    | <b>688.373664</b>  | 344.690470        | 671.347115     | 336.177195       | 670.363099     | 335.685187       | 6  |
| 16 | 1719.927576       | 860.467426      | 1702.901027    | 851.954151       | 1701.917011        | 851.462143        | Q    | 574.330737         | <b>287.669006</b> | 557.304188     | 279.155732       | 556.320172     | 278.663724       | 5  |
| 17 | 1833.011640       | 917.009458      | 1815.985091    | 908.496183       | 1815.001075        | 908.004175        | L    | 446.272159         | 223.639717        | 429.245610     | 215.126443       | 428.261594     | 214.634435       | 4  |
| 18 | 1934.059319       | 967.533297      | 1917.032770    | 959.020023       | 1916.048754        | 958.528015        | T    | <b>333.188095</b>  | 167.097685        | 316.161546     | 158.584411       | 315.177530     | 158.092403       | 3  |
| 19 | 1991.080783       | 996.044029      | 1974.054234    | 987.530755       | 1973.070218        | 987.038747        | G    | <b>232.140416</b>  | 116.573846        | 215.113867     | 108.060571       |                |                  | 2  |
| 20 |                   |                 |                |                  |                    |                   | R    | 175.118952         | 88.063114         | 158.092403     | 79.549839        |                |                  | 1  |

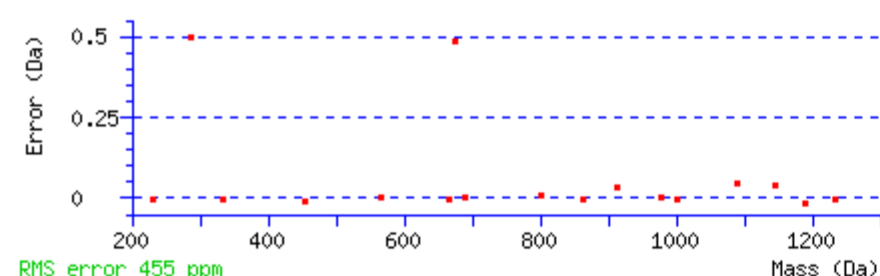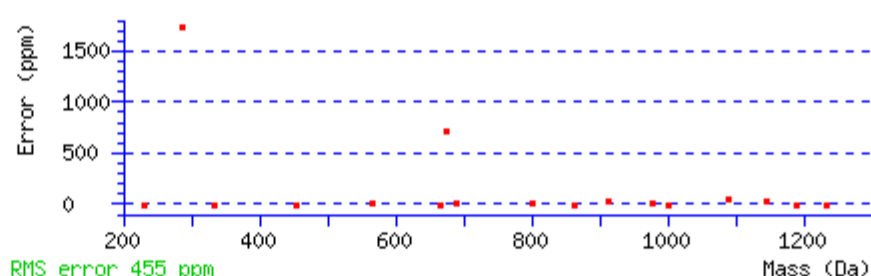

NCBI BLAST search of **DSIHLTPVLTSSILNQLTGR**

(Parameters: blastp, nr protein database, expect=20000, no filter, PAM30)

Other BLAST [web gateways](#)

All matches to this query

| Score | Mr(calc):   | Delta    | Sequence                             |
|-------|-------------|----------|--------------------------------------|
| 61.0  | 2164.185181 | 0.000101 | <a href="#">DSIHLTPVLTSSILNQLTGR</a> |

Mascot: <http://www.matrixscience.com/>



# **MASCOT** Mascot Search Results

## Peptide View

MS/MS Fragmentation of **LIVENLSSR**

Found in **SRSF4\_HUMAN**, Serine/arginine-rich splicing factor 4 OS=Homo sapiens GN=SRSF4 PE=1 SV=2

Match to Query 17281: 1029.585108 from(515.799830,2+) rtinseconds(1988) index(21730)

Title: Locus:1.1.1.2186.21

Data file 2011-11-10 - TFD - EP 3-1.mgf

Click mouse within plot area to zoom in by factor of two about that point

Or, Plot from  to  Da

Label all possible matches  Label matches used for scoring

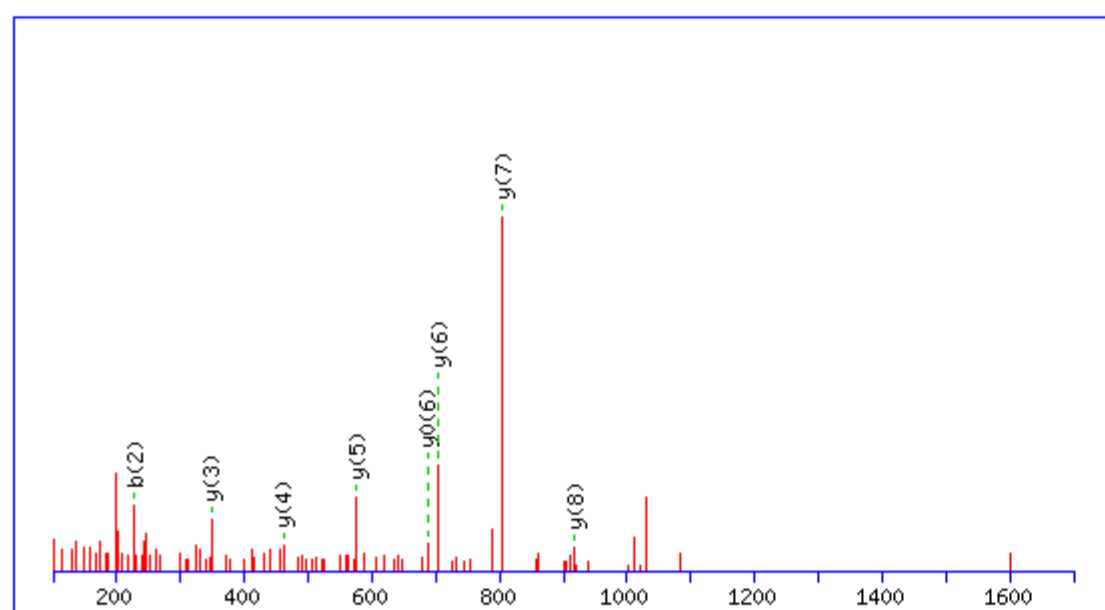

Monoisotopic mass of neutral peptide Mr(calc): 1029.581833

Fixed modifications: Propionamide (C) (apply to specified residues or termini only)

Ions Score: 52 Expect: 5.3e-005

Matches : 8/80 fragment ions using 10 most intense peaks [\(help\)](#)

| # | b                 | b <sup>++</sup> | b <sup>*</sup> | b <sup>*++</sup> | b <sup>0</sup> | b <sup>0++</sup> | Seq. | y                 | y <sup>++</sup> | y <sup>*</sup> | y <sup>*++</sup> | y <sup>0</sup>    | y <sup>0++</sup> | # |
|---|-------------------|-----------------|----------------|------------------|----------------|------------------|------|-------------------|-----------------|----------------|------------------|-------------------|------------------|---|
| 1 | 114.091340        | 57.549308       |                |                  |                |                  | L    |                   |                 |                |                  |                   |                  | 9 |
| 2 | <b>227.175404</b> | 114.091340      |                |                  |                |                  | I    | <b>917.505070</b> | 459.256173      | 900.478521     | 450.742899       | 899.494505        | 450.250891       | 8 |
| 3 | 326.243818        | 163.625547      |                |                  |                |                  | V    | <b>804.421006</b> | 402.714141      | 787.394457     | 394.200867       | 786.410441        | 393.708859       | 7 |
| 4 | 455.286411        | 228.146843      |                |                  | 437.275846     | 219.141561       | E    | <b>705.352592</b> | 353.179934      | 688.326043     | 344.666660       | <b>687.342027</b> | 344.174652       | 6 |
| 5 | 569.329338        | 285.168307      | 552.302789     | 276.655033       | 551.318773     | 276.163025       | N    | <b>576.309999</b> | 288.658638      | 559.283450     | 280.145363       | 558.299434        | 279.653355       | 5 |
| 6 | 682.413402        | 341.710339      | 665.386853     | 333.197065       | 664.402837     | 332.705057       | L    | <b>462.267072</b> | 231.637174      | 445.240523     | 223.123899       | 444.256507        | 222.631891       | 4 |
| 7 | 769.445430        | 385.226353      | 752.418881     | 376.713078       | 751.434865     | 376.221071       | S    | <b>349.183008</b> | 175.095142      | 332.156459     | 166.581867       | 331.172443        | 166.089859       | 3 |
| 8 | 856.477458        | 428.742367      | 839.450909     | 420.229092       | 838.466893     | 419.737084       | S    | 262.150980        | 131.579128      | 245.124431     | 123.065854       | 244.140415        | 122.573846       | 2 |
| 9 |                   |                 |                |                  |                |                  | R    | 175.118952        | 88.063114       | 158.092403     | 79.549840        |                   |                  | 1 |

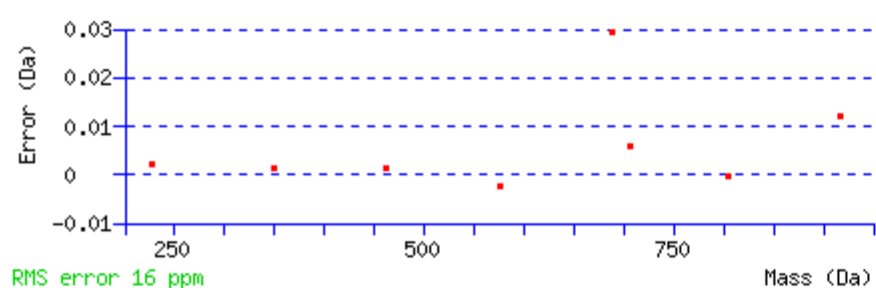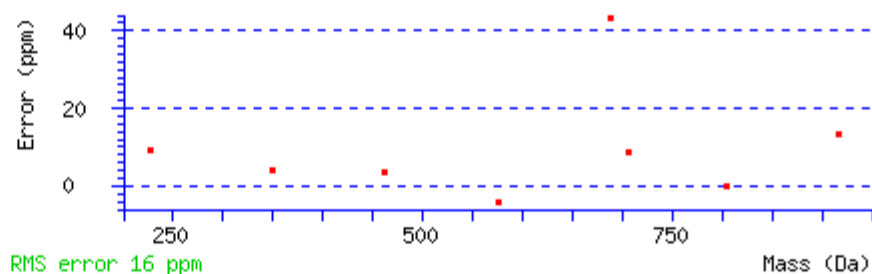

NCBI BLAST search of [LIVENLSSR](#)

(Parameters: blastp, nr protein database, expect=20000, no filter, PAM30)

Other BLAST [web gateways](#)

## All matches to this query

| Score | Mr(calc):   | Delta     | Sequence                  |
|-------|-------------|-----------|---------------------------|
| 52.3  | 1029.581833 | 0.003275  | <a href="#">LIVENLSSR</a> |
| 17.4  | 1029.590561 | -0.005453 | <a href="#">LLWRICR</a>   |
| 9.7   | 1029.593063 | -0.007955 | <a href="#">LLIRDASSR</a> |
| 0.5   | 1029.589249 | -0.004141 | <a href="#">IIGIPTCVK</a> |
| 0.1   | 1029.585876 | -0.000768 | <a href="#">LIPGFIPNK</a> |
| 0.1   | 1029.585892 | -0.000784 | <a href="#">LPTFVNVPK</a> |

# **MASCOT** Mascot Search Results

## Peptide View

### MS/MS Fragmentation of **LIDIVSSQK**

Found in **CHK1\_HUMAN**, Serine/threonine-protein kinase Chk1 OS=Homo sapiens GN=CHK1 PE=1 SV=2

Match to Query 13151: 1001.579188 from(501.796870,2+) rtinseconds(1964) index(22171)

Title: Locus:1.1.1.2117.21

Data file 2011-11-12 - TFD - EP 6-3.mgf

Click mouse within plot area to zoom in by factor of two about that point

Or, Plot from  to  Da

Label all possible matches  Label matches used for scoring

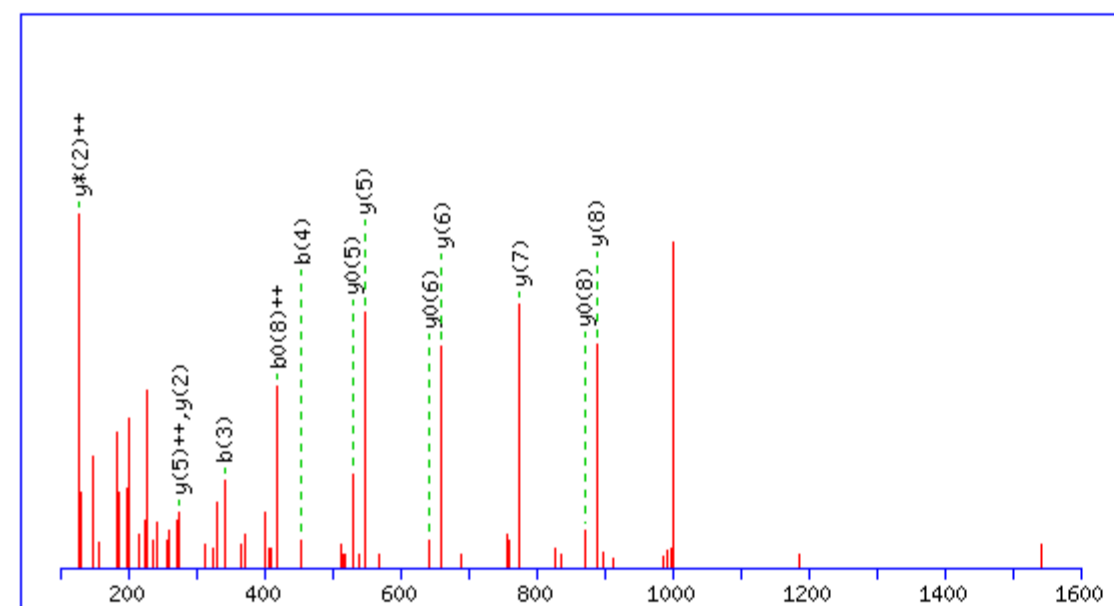

Monoisotopic mass of neutral peptide Mr(calc): 1001.575699

Fixed modifications: Propionamide (C) (apply to specified residues or termini only)

Ions Score: 33 Expect: 0.0036

Matches : 13/74 fragment ions using 18 most intense peaks ([help](#))

| # | b          | b <sup>++</sup> | b <sup>*</sup> | b <sup>*++</sup> | b <sup>0</sup> | b <sup>0++</sup> | Seq. | y          | y <sup>++</sup> | y <sup>*</sup> | y <sup>*++</sup> | y <sup>0</sup> | y <sup>0++</sup> | # |
|---|------------|-----------------|----------------|------------------|----------------|------------------|------|------------|-----------------|----------------|------------------|----------------|------------------|---|
| 1 | 114.091340 | 57.549308       |                |                  |                |                  | L    |            |                 |                |                  |                |                  | 9 |
| 2 | 227.175404 | 114.091340      |                |                  |                |                  | I    | 889.498923 | 445.253100      | 872.472374     | 436.739825       | 871.488358     | 436.247817       | 8 |
| 3 | 342.202347 | 171.604811      |                |                  | 324.191782     | 162.599529       | D    | 776.414859 | 388.711068      | 759.388310     | 380.197793       | 758.404294     | 379.705785       | 7 |
| 4 | 455.286411 | 228.146843      |                |                  | 437.275846     | 219.141561       | I    | 661.387916 | 331.197596      | 644.361367     | 322.684322       | 643.377351     | 322.192314       | 6 |
| 5 | 554.354825 | 277.681051      |                |                  | 536.344260     | 268.675768       | V    | 548.303852 | 274.655564      | 531.277303     | 266.142290       | 530.293287     | 265.650282       | 5 |
| 6 | 641.386853 | 321.197065      |                |                  | 623.376288     | 312.191782       | S    | 449.235438 | 225.121357      | 432.208889     | 216.608082       | 431.224873     | 216.116074       | 4 |
| 7 | 728.418881 | 364.713078      |                |                  | 710.408316     | 355.707796       | S    | 362.203410 | 181.605343      | 345.176861     | 173.092068       | 344.192845     | 172.600060       | 3 |
| 8 | 856.477459 | 428.742368      | 839.450910     | 420.229093       | 838.466894     | 419.737085       | Q    | 275.171382 | 138.089329      | 258.144833     | 129.576055       |                |                  | 2 |
| 9 |            |                 |                |                  |                |                  | K    | 147.112804 | 74.060040       | 130.086255     | 65.546765        |                |                  | 1 |

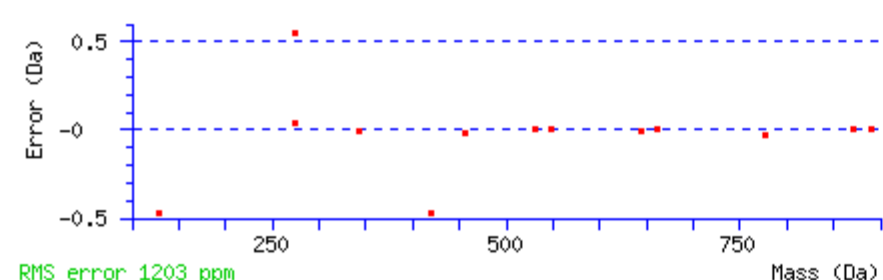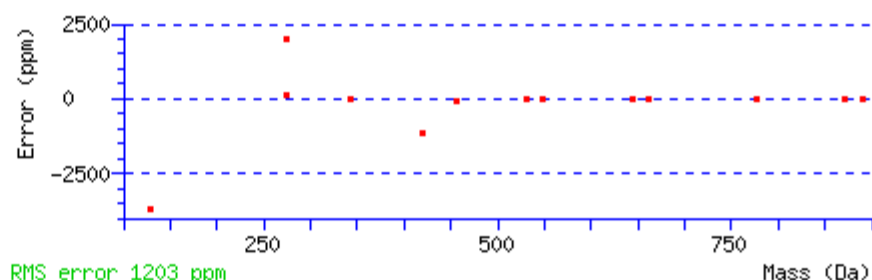

### NCBI BLAST search of **LIDIVSSQK**

(Parameters: blastp, nr protein database, expect=20000, no filter, PAM30)

Other BLAST [web gateways](#)

### All matches to this query

| Score | Mr(calc):   | Delta     | Sequence                  |
|-------|-------------|-----------|---------------------------|
| 32.9  | 1001.575699 | 0.003489  | <a href="#">LIDIVSSQK</a> |
| 23.0  | 1001.575699 | 0.003489  | <a href="#">LPDLKSSVK</a> |
| 12.1  | 1001.586929 | -0.007741 | <a href="#">LSNNTKVVK</a> |
| 8.4   | 1001.575699 | 0.003489  | <a href="#">VEELVTGKK</a> |
| 5.5   | 1001.586929 | -0.007741 | <a href="#">LLQSTGQKK</a> |
| 5.1   | 1001.575699 | 0.003489  | <a href="#">LPSSVEVKK</a> |
| 3.4   | 1001.575684 | 0.003504  | <a href="#">LQTELASLK</a> |
| 3.4   | 1001.580399 | -0.001211 | <a href="#">ILSGRMLR</a>  |
| 2.9   | 1001.569183 | 0.010005  | <a href="#">MPVQIRVK</a>  |
| 0.8   | 1001.575684 | 0.003504  | <a href="#">IDVASIKEK</a> |

# MASCOT SCIENCE Mascot Search Results

## Peptide View

MS/MS Fragmentation of **AILTAAIVDADR**

Found in **MRCKB\_HUMAN**, Serine/threonine-protein kinase MRCK beta OS=Homo sapiens GN=CDC42BPB PE=1 SV=2

Match to Query 27975: 1227.683308 from(614.848930,2+) rtinseconds(2637) index(31351)

Title: Locus:1.1.1.2556.28

Data file 2011-11-12 - TFD - EP 5-1.mgf

Click mouse within plot area to zoom in by factor of two about that point

Or, Plot from  to  Da

Label all possible matches  Label matches used for scoring

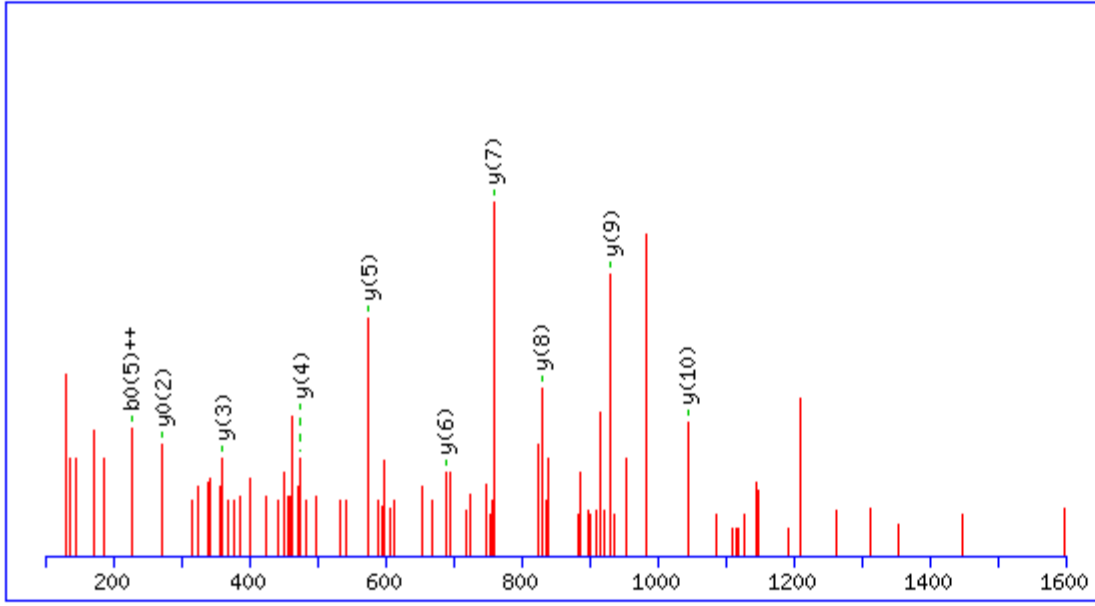

Monoisotopic mass of neutral peptide  $M_r(\text{calc})$ : 1227.682281

Fixed modifications: Propionamide (C) (apply to specified residues or termini only)

Ions Score: 50 Expect: 2.9e-005

Matches : 10/102 fragment ions using 22 most intense peaks ([help](#))

| #  | b           | b <sup>++</sup> | b <sup>0</sup> | b <sup>0++</sup>  | Seq. | y                  | y <sup>++</sup> | y <sup>*</sup> | y <sup>*++</sup> | y <sup>0</sup>    | y <sup>0++</sup> | #  |
|----|-------------|-----------------|----------------|-------------------|------|--------------------|-----------------|----------------|------------------|-------------------|------------------|----|
| 1  | 72.044390   | 36.525833       |                |                   | A    |                    |                 |                |                  |                   |                  | 12 |
| 2  | 185.128454  | 93.067865       |                |                   | I    | 1157.652465        | 579.329870      | 1140.625916    | 570.816596       | 1139.641900       | 570.324588       | 11 |
| 3  | 298.212518  | 149.609897      |                |                   | L    | <b>1044.568401</b> | 522.787838      | 1027.541852    | 514.274564       | 1026.557836       | 513.782556       | 10 |
| 4  | 399.260197  | 200.133737      | 381.249632     | 191.128454        | T    | <b>931.484337</b>  | 466.245806      | 914.457788     | 457.732532       | 913.473772        | 457.240524       | 9  |
| 5  | 470.297311  | 235.652293      | 452.286746     | <b>226.647011</b> | A    | <b>830.436658</b>  | 415.721967      | 813.410109     | 407.208692       | 812.426093        | 406.716684       | 8  |
| 6  | 541.334425  | 271.170851      | 523.323860     | 262.165568        | A    | <b>759.399544</b>  | 380.203410      | 742.372995     | 371.690135       | 741.388979        | 371.198127       | 7  |
| 7  | 654.418489  | 327.712883      | 636.407924     | 318.707600        | I    | <b>688.362430</b>  | 344.684853      | 671.335881     | 336.171578       | 670.351865        | 335.679570       | 6  |
| 8  | 753.486903  | 377.247090      | 735.476338     | 368.241807        | V    | <b>575.278366</b>  | 288.142821      | 558.251817     | 279.629546       | 557.267801        | 279.137538       | 5  |
| 9  | 868.513846  | 434.760561      | 850.503281     | 425.755278        | D    | <b>476.209952</b>  | 238.608614      | 459.183403     | 230.095339       | 458.199387        | 229.603331       | 4  |
| 10 | 939.550960  | 470.279118      | 921.540395     | 461.273835        | A    | <b>361.183009</b>  | 181.095142      | 344.156460     | 172.581868       | 343.172444        | 172.089860       | 3  |
| 11 | 1054.577903 | 527.792589      | 1036.567338    | 518.787307        | D    | 290.145895         | 145.576585      | 273.119346     | 137.063311       | <b>272.135330</b> | 136.571303       | 2  |
| 12 |             |                 |                |                   | R    | 175.118952         | 88.063114       | 158.092403     | 79.549839        |                   |                  | 1  |

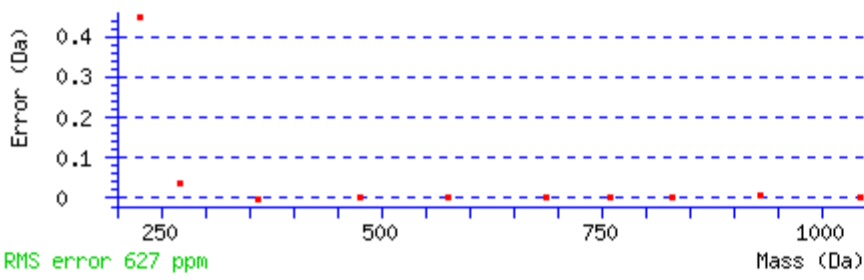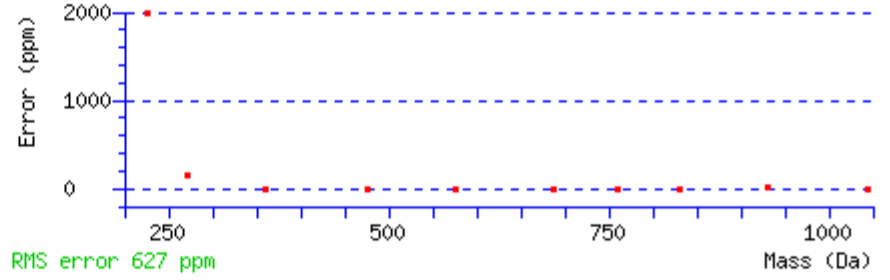

NCBI BLAST search of [AILTAAIVDADR](#)

(Parameters: blastp, nr protein database, expect=20000, no filter, PAM30)

Other BLAST [web gateways](#)

All matches to this query

| Score | $M_r(\text{calc})$ : | Delta    | Sequence                     |
|-------|----------------------|----------|------------------------------|
| 50.1  | 1227.682281          | 0.001027 | <a href="#">AILTAAIVDADR</a> |
| 1.8   | 1227.682297          | 0.001011 | <a href="#">DLLPTVNSLTR</a>  |

# MASCOT SCIENCE Mascot Search Results

## Peptide View

MS/MS Fragmentation of **VLGLLGALDPYK**

Found in **MTOR\_HUMAN**, Serine/threonine-protein kinase mTOR OS=Homo sapiens GN=MTOR PE=1 SV=1

Match to Query 33192: 1257.740188 from(629.877370,2+) rtinseconds(3783) index(56048)

Title: Locus:1.1.1.2741.9

Data file 2011-11-12 - TFD - EP 6-1.mgf

Click mouse within plot area to zoom in by factor of two about that point

Or, Plot from  to  Da

Label all possible matches  Label matches used for scoring

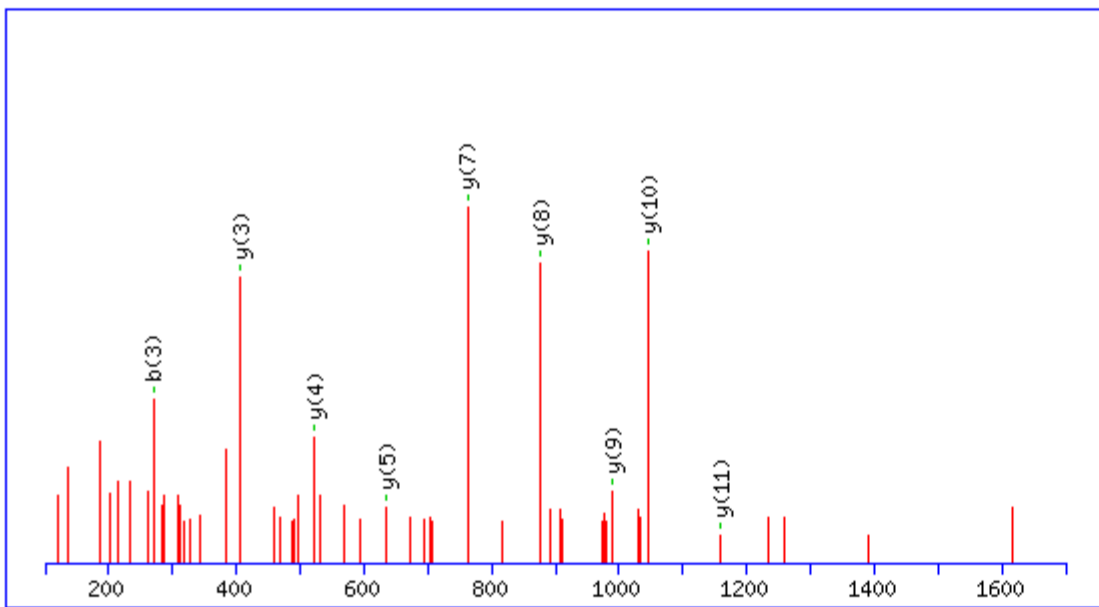

Monoisotopic mass of neutral peptide  $M_r(\text{calc})$ : 1257.733261

Fixed modifications: Propionamide (C) (apply to specified residues or termini only)

Ions Score: 67 Expect: 7.5e-007

Matches : 9/88 fragment ions using 12 most intense peaks [\(help\)](#)

| #  | b                 | b <sup>++</sup> | b <sup>0</sup> | b <sup>0++</sup> | Seq. | y                  | y <sup>++</sup> | y <sup>*</sup> | y <sup>*++</sup> | y <sup>0</sup> | y <sup>0++</sup> | #  |
|----|-------------------|-----------------|----------------|------------------|------|--------------------|-----------------|----------------|------------------|----------------|------------------|----|
| 1  | 100.075690        | 50.541483       |                |                  | V    |                    |                 |                |                  |                |                  | 12 |
| 2  | 213.159754        | 107.083515      |                |                  | L    | <b>1159.672138</b> | 580.339707      | 1142.645589    | 571.826433       | 1141.661573    | 571.334425       | 11 |
| 3  | <b>270.181218</b> | 135.594247      |                |                  | G    | <b>1046.588074</b> | 523.797675      | 1029.561525    | 515.284401       | 1028.577509    | 514.792393       | 10 |
| 4  | 383.265282        | 192.136279      |                |                  | L    | <b>989.566610</b>  | 495.286943      | 972.540061     | 486.773669       | 971.556045     | 486.281661       | 9  |
| 5  | 496.349346        | 248.678311      |                |                  | L    | <b>876.482546</b>  | 438.744911      | 859.455997     | 430.231637       | 858.471981     | 429.739629       | 8  |
| 6  | 553.370810        | 277.189043      |                |                  | G    | <b>763.398482</b>  | 382.202879      | 746.371933     | 373.689605       | 745.387917     | 373.197597       | 7  |
| 7  | 624.407924        | 312.707600      |                |                  | A    | 706.377018         | 353.692147      | 689.350469     | 345.178873       | 688.366453     | 344.686865       | 6  |
| 8  | 737.491988        | 369.249632      |                |                  | L    | <b>635.339904</b>  | 318.173590      | 618.313355     | 309.660316       | 617.329339     | 309.168308       | 5  |
| 9  | 852.518931        | 426.763104      | 834.508366     | 417.757821       | D    | <b>522.255840</b>  | 261.631558      | 505.229291     | 253.118284       | 504.245275     | 252.626276       | 4  |
| 10 | 949.571695        | 475.289486      | 931.561130     | 466.284203       | P    | <b>407.228897</b>  | 204.118087      | 390.202348     | 195.604812       |                |                  | 3  |
| 11 | 1112.635024       | 556.821150      | 1094.624459    | 547.815868       | Y    | 310.176133         | 155.591705      | 293.149584     | 147.078430       |                |                  | 2  |
| 12 |                   |                 |                |                  | K    | 147.112804         | 74.060040       | 130.086255     | 65.546765        |                |                  | 1  |

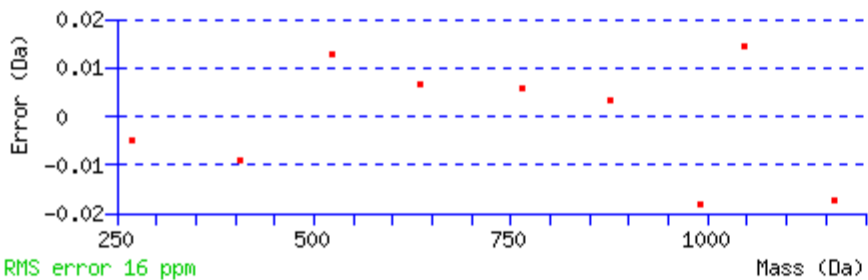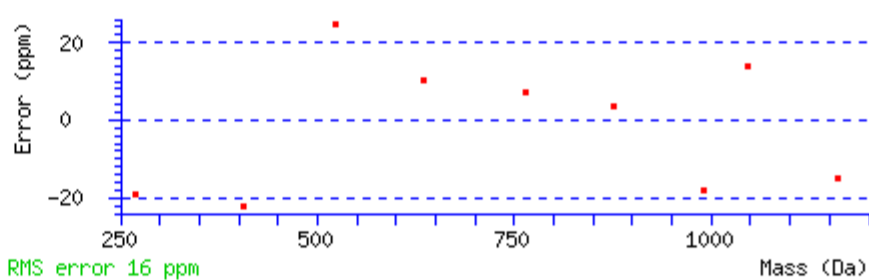

NCBI BLAST search of [VLGLLGALDPYK](#)

(Parameters: blastp, nr protein database, expect=20000, no filter, PAM30)

Other BLAST [web gateways](#)

## All matches to this query

| Score | $M_r(\text{calc})$ : | Delta     | Sequence                     |
|-------|----------------------|-----------|------------------------------|
| 66.7  | 1257.733261          | 0.006927  | <a href="#">VLGLLGALDPYK</a> |
| 11.2  | 1257.751892          | -0.011704 | <a href="#">VLQLLMPLFK</a>   |

# **MATRIX** SCIENCE Mascot Search Results

## Peptide View

MS/MS Fragmentation of **LILPNKQK**

Found in **NEK10\_HUMAN**, Serine/threonine-protein kinase Nek10 OS=Homo sapiens GN=NEK10 PE=2 SV=2

Match to Query 12293: 952.599608 from(477.307080,2+) rtinseconds(3375) index(34417)

Title: Locus:1.1.1.2695.4

Data file 2011-11-10 - TFD - EP 3-7.mgf

Click mouse within plot area to zoom in by factor of two about that point

Or, Plot from  to  Da

Label all possible matches  Label matches used for scoring

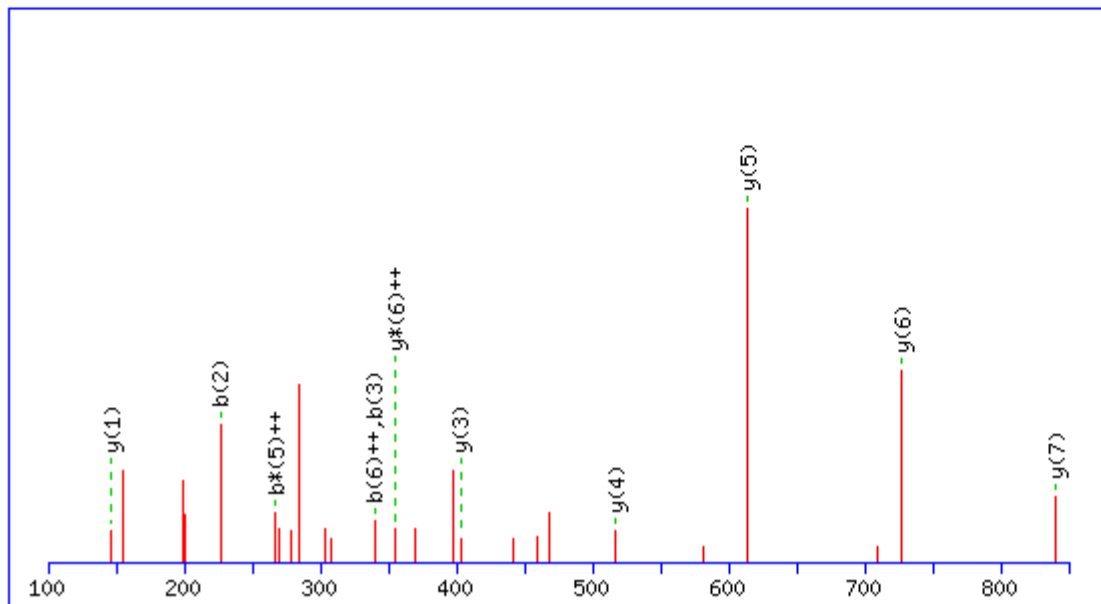

Monoisotopic mass of neutral peptide Mr(calc): 952.606918

Fixed modifications: Propionamide (C) (apply to specified residues or termini only)

Ions Score: 39 Expect: 0.00034

Matches : 11/48 fragment ions using 23 most intense peaks ([help](#))

| # | b                 | b <sup>++</sup>   | b <sup>*</sup> | b <sup>++</sup>   | Seq. | y                 | y <sup>++</sup> | y <sup>*</sup> | y <sup>++</sup>   | # |
|---|-------------------|-------------------|----------------|-------------------|------|-------------------|-----------------|----------------|-------------------|---|
| 1 | 114.091340        | 57.549308         |                |                   | L    |                   |                 |                |                   | 8 |
| 2 | <b>227.175404</b> | 114.091340        |                |                   | I    | <b>840.530164</b> | 420.768720      | 823.503615     | 412.255446        | 7 |
| 3 | <b>340.259468</b> | 170.633372        |                |                   | L    | <b>727.446100</b> | 364.226688      | 710.419551     | <b>355.713414</b> | 6 |
| 4 | 437.312232        | 219.159754        |                |                   | P    | <b>614.362036</b> | 307.684656      | 597.335487     | 299.171382        | 5 |
| 5 | 551.355159        | 276.181218        | 534.328610     | <b>267.667943</b> | N    | <b>517.309272</b> | 259.158274      | 500.282723     | 250.645000        | 4 |
| 6 | 679.450122        | <b>340.228699</b> | 662.423573     | 331.715424        | K    | <b>403.266345</b> | 202.136811      | 386.239796     | 193.623536        | 3 |
| 7 | 807.508700        | 404.257988        | 790.482151     | 395.744713        | Q    | 275.171382        | 138.089329      | 258.144833     | 129.576055        | 2 |
| 8 |                   |                   |                |                   | K    | <b>147.112804</b> | 74.060040       | 130.086255     | 65.546765         | 1 |

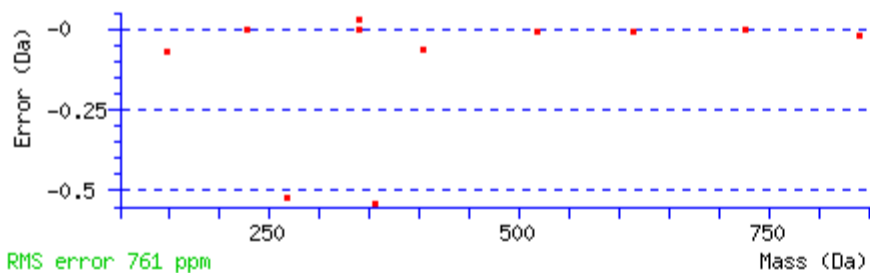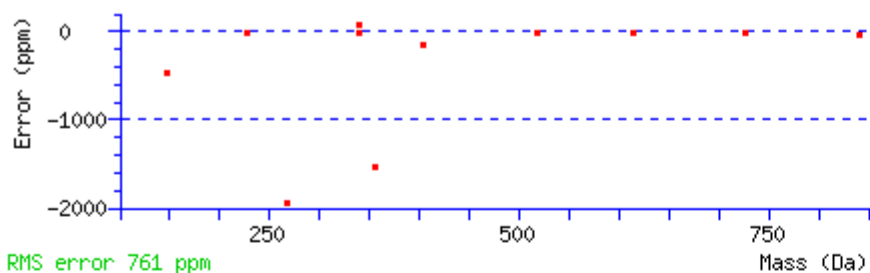

NCBI BLAST search of [LILPNKQK](#)

(Parameters: blastp, nr protein database, expect=20000, no filter, PAM30)

Other BLAST [web gateways](#)

## All matches to this query

| Score | Mr(calc):  | Delta     | Sequence                  |
|-------|------------|-----------|---------------------------|
| 38.6  | 952.606918 | -0.007310 | <a href="#">LILPNKQK</a>  |
| 30.3  | 952.595688 | 0.003920  | <a href="#">LLPGELAK</a>  |
| 30.3  | 952.595688 | 0.003920  | <a href="#">IIPEIQK</a>   |
| 28.9  | 952.606934 | -0.007326 | <a href="#">LLGATLPR</a>  |
| 24.0  | 952.595703 | 0.003905  | <a href="#">ILGILPPSK</a> |
| 24.0  | 952.595703 | 0.003905  | <a href="#">ILGILPPSK</a> |
| 23.5  | 952.595688 | 0.003920  | <a href="#">ILLLEAGPK</a> |
| 21.5  | 952.597031 | 0.002577  | <a href="#">LLIPRWR</a>   |
| 19.8  | 952.595688 | 0.003920  | <a href="#">LLIKEPPK</a>  |
| 19.8  | 952.595688 | 0.003920  | <a href="#">LLIKEPPK</a>  |

# **MASCOT** Mascot Search Results

## Peptide View

MS/MS Fragmentation of **AALQSPFYGDK**

Found in **NEK6\_HUMAN**, Serine/threonine-protein kinase Nek6 OS=Homo sapiens GN=NEK6 PE=1 SV=2

Match to Query 514322: 1195.586368 from(598.800460,2+) rtinseconds(2215) index(680112)

Title: Locus:1.1.1.1514.22

Data file C:\Program Files (x86)\Matrix Science\Mascot Daemon\mgf3 TFD - Epitel - R2\mascot\_daemon\_merge.mgf

Click mouse within plot area to zoom in by factor of two about that point

Or, Plot from  to  Da

Label all possible matches  Label matches used for scoring

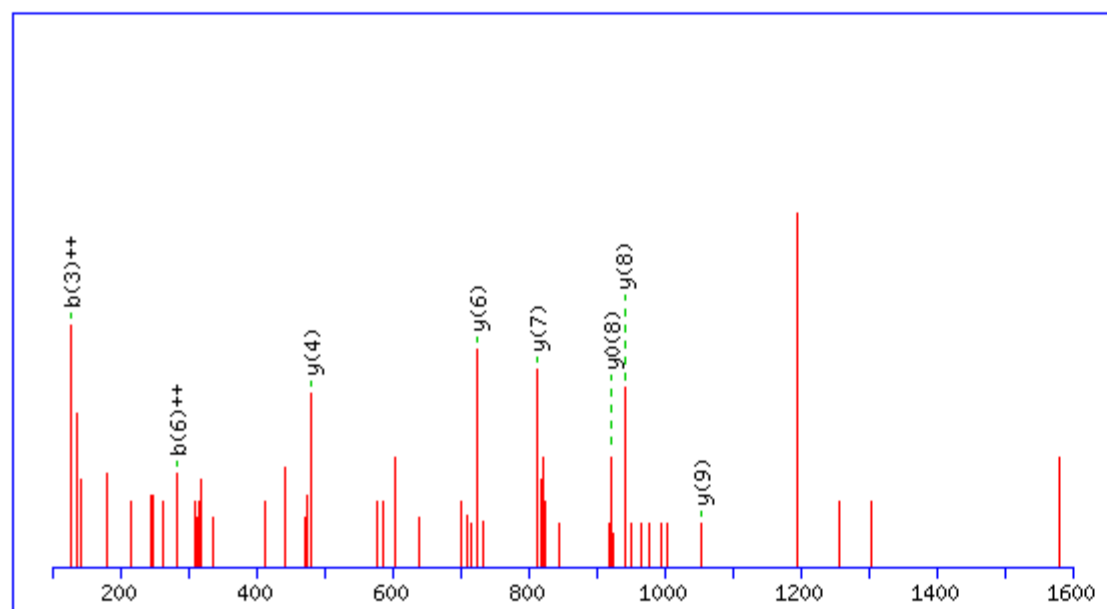

Monoisotopic mass of neutral peptide Mr(calc): 1195.587326

Fixed modifications: Carbamidomethyl (C) (apply to specified residues or termini only)

Ions Score: 39 Expect: 0.002

Matches : 8/104 fragment ions using 10 most intense peaks ([help](#))

| #  | b           | b <sup>++</sup>   | b <sup>*</sup> | b <sup>*++</sup> | b <sup>0</sup> | b <sup>0++</sup> | Seq. | y                  | y <sup>++</sup> | y <sup>*</sup> | y <sup>*++</sup> | y <sup>0</sup>    | y <sup>0++</sup> | #  |
|----|-------------|-------------------|----------------|------------------|----------------|------------------|------|--------------------|-----------------|----------------|------------------|-------------------|------------------|----|
| 1  | 72.044390   | 36.525833         |                |                  |                |                  | A    |                    |                 |                |                  |                   |                  | 11 |
| 2  | 143.081504  | 72.044390         |                |                  |                |                  | A    | 1125.557502        | 563.282389      | 1108.530953    | 554.769115       | 1107.546937       | 554.277107       | 10 |
| 3  | 256.165568  | <b>128.586422</b> |                |                  |                |                  | L    | <b>1054.520388</b> | 527.763832      | 1037.493839    | 519.250558       | 1036.509823       | 518.758550       | 9  |
| 4  | 384.224146  | 192.615711        | 367.197597     | 184.102437       |                |                  | Q    | <b>941.436324</b>  | 471.221800      | 924.409775     | 462.708526       | <b>923.425759</b> | 462.216518       | 8  |
| 5  | 471.256174  | 236.131725        | 454.229625     | 227.618451       | 453.245609     | 227.126443       | S    | <b>813.377746</b>  | 407.192511      | 796.351197     | 398.679237       | 795.367181        | 398.187229       | 7  |
| 6  | 568.308938  | <b>284.658107</b> | 551.282389     | 276.144833       | 550.298373     | 275.652825       | P    | <b>726.345718</b>  | 363.676497      | 709.319169     | 355.163223       | 708.335153        | 354.671215       | 6  |
| 7  | 715.377352  | 358.192314        | 698.350803     | 349.679040       | 697.366787     | 349.187032       | F    | 629.292954         | 315.150115      | 612.266405     | 306.636841       | 611.282389        | 306.144833       | 5  |
| 8  | 878.440681  | 439.723979        | 861.414132     | 431.210704       | 860.430116     | 430.718696       | Y    | <b>482.224540</b>  | 241.615908      | 465.197991     | 233.102633       | 464.213975        | 232.610625       | 4  |
| 9  | 935.462145  | 468.234711        | 918.435596     | 459.721436       | 917.451580     | 459.229428       | G    | 319.161211         | 160.084243      | 302.134662     | 151.570969       | 301.150646        | 151.078961       | 3  |
| 10 | 1050.489088 | 525.748182        | 1033.462539    | 517.234908       | 1032.478523    | 516.742900       | D    | 262.139747         | 131.573511      | 245.113198     | 123.060237       | 244.129182        | 122.568229       | 2  |
| 11 |             |                   |                |                  |                |                  | K    | 147.112804         | 74.060040       | 130.086255     | 65.546765        |                   |                  | 1  |

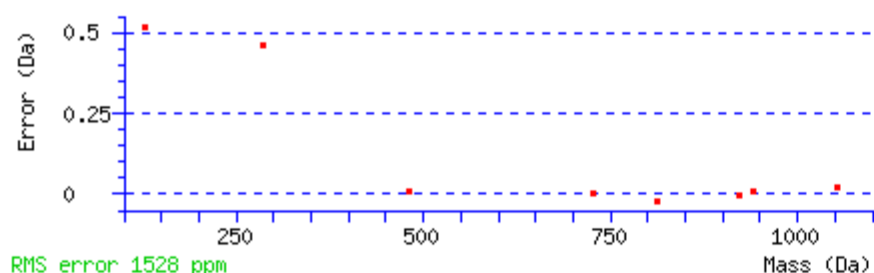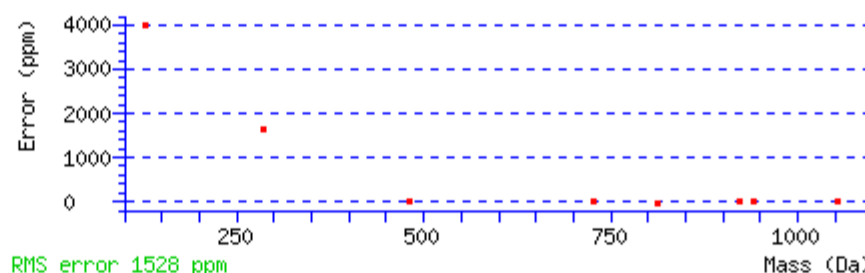

NCBI BLAST search of [AALQSPFYGDK](#)

(Parameters: blastp, nr protein database, expect=20000, no filter, PAM30)

Other BLAST [web gateways](#)

All matches to this query

| Score | Mr(calc):   | Delta     | Sequence                    |
|-------|-------------|-----------|-----------------------------|
| 38.6  | 1195.587326 | -0.000958 | <a href="#">AALQSPFYGDK</a> |

Mascot: <http://www.matrixscience.com/>

# MASCOT Search Results

## Peptide View

MS/MS Fragmentation of **IVEEPQSNR**

Found in **OXSRI\_HUMAN**, Serine/threonine-protein kinase OSR1 OS=Homo sapiens GN=OXSRI PE=1 SV=1

Match to Query 19770: 1070.530748 from(536.272650,2+) rtinseconds(894) index(2014)

Title: Locus:1.1.1.727.27

Data file 2012-01-27 - TFD - Epitel - IEC - 10ul - 1.mgf

Click mouse within plot area to zoom in by factor of two about that point

Or, Plot from  to  Da

Label all possible matches  Label matches used for scoring

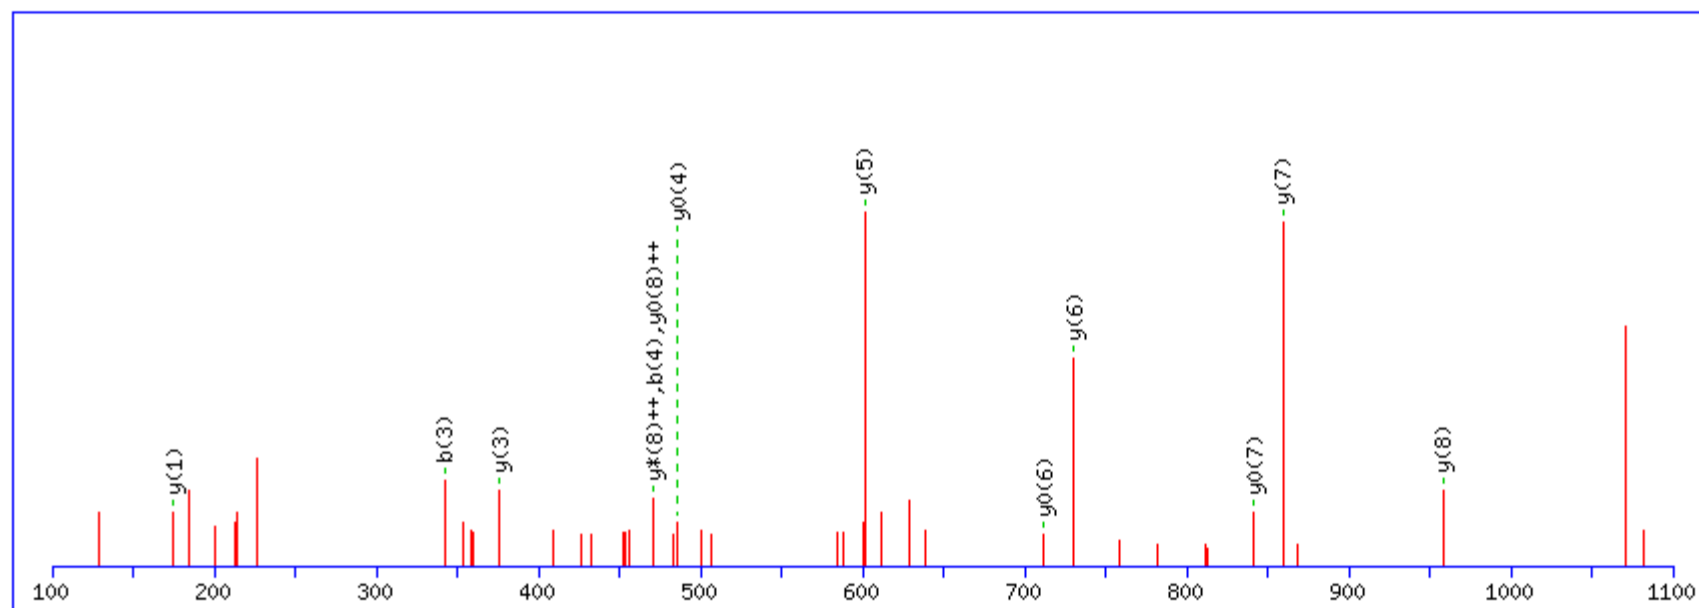

Monoisotopic mass of neutral peptide Mr(calc): 1070.535614

Fixed modifications: Carbamidomethyl (C) (apply to specified residues or termini only)

Ions Score: 36 Expect: 0.0028

Matches : 13/78 fragment ions using 22 most intense peaks [\(help\)](#)

| # | b                 | b <sup>++</sup> | b <sup>*</sup> | b <sup>*++</sup> | b <sup>0</sup> | b <sup>0++</sup> | Seq. | y                 | y <sup>++</sup> | y <sup>*</sup> | y <sup>*++</sup>  | y <sup>0</sup>    | y <sup>0++</sup>  | # |
|---|-------------------|-----------------|----------------|------------------|----------------|------------------|------|-------------------|-----------------|----------------|-------------------|-------------------|-------------------|---|
| 1 | 114.091340        | 57.549308       |                |                  |                |                  | I    |                   |                 |                |                   |                   |                   | 9 |
| 2 | 213.159754        | 107.083515      |                |                  |                |                  | V    | <b>958.458849</b> | 479.733063      | 941.432300     | <b>471.219788</b> | 940.448284        | <b>470.727780</b> | 8 |
| 3 | <b>342.202347</b> | 171.604811      |                |                  | 324.191782     | 162.599529       | E    | <b>859.390435</b> | 430.198856      | 842.363886     | 421.685581        | <b>841.379870</b> | 421.193573        | 7 |
| 4 | <b>471.244940</b> | 236.126108      |                |                  | 453.234375     | 227.120826       | E    | <b>730.347842</b> | 365.677559      | 713.321293     | 357.164285        | <b>712.337277</b> | 356.672277        | 6 |
| 5 | 568.297704        | 284.652490      |                |                  | 550.287139     | 275.647208       | P    | <b>601.305249</b> | 301.156263      | 584.278700     | 292.642988        | 583.294684        | 292.150980        | 5 |
| 6 | 696.356282        | 348.681779      | 679.329733     | 340.168505       | 678.345717     | 339.676497       | Q    | 504.252485        | 252.629880      | 487.225936     | 244.116606        | <b>486.241920</b> | 243.624598        | 4 |
| 7 | 783.388310        | 392.197793      | 766.361761     | 383.684519       | 765.377745     | 383.192511       | S    | <b>376.193907</b> | 188.600591      | 359.167358     | 180.087317        | 358.183342        | 179.595309        | 3 |
| 8 | 897.431237        | 449.219257      | 880.404688     | 440.705982       | 879.420672     | 440.213974       | N    | 289.161879        | 145.084577      | 272.135330     | 136.571303        |                   |                   | 2 |
| 9 |                   |                 |                |                  |                |                  | R    | <b>175.118952</b> | 88.063114       | 158.092403     | 79.549839         |                   |                   | 1 |

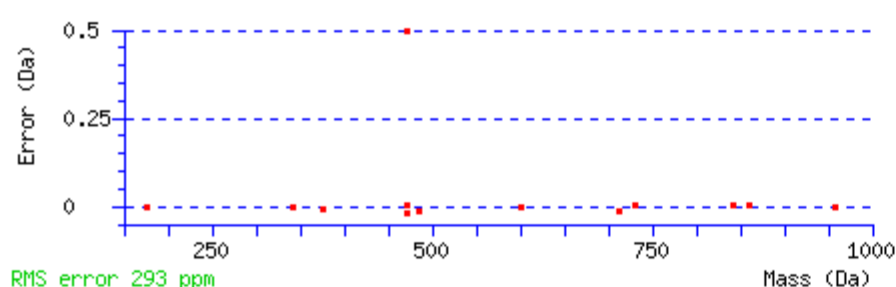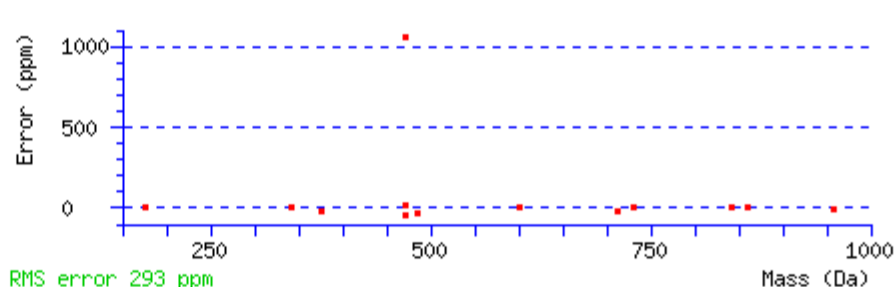

NCBI BLAST search of [IVEEPQSNR](#)

(Parameters: blastp, nr protein database, expect=20000, no filter, PAM30)

Other BLAST [web gateways](#)

## All matches to this query

| Score | Mr(calc):   | Delta     | Sequence                   |
|-------|-------------|-----------|----------------------------|
| 35.8  | 1070.535614 | -0.004866 | <a href="#">IVEEPQSNR</a>  |
| 15.2  | 1070.524384 | 0.006364  | <a href="#">LDLEAPEPR</a>  |
| 6.4   | 1070.525269 | 0.005479  | <a href="#">LVTCYLRM</a>   |
| 1.8   | 1070.535645 | -0.004897 | <a href="#">LDGSIPPGQR</a> |

Mascot: <http://www.matrixscience.com/>

**Peptide View**

MS/MS Fragmentation of **VMSIPDVIRLK**  
Found in **PRKX\_HUMAN**, cAMP-dependent protein kinase catalytic subunit PRKX OS=Homo sapiens GN=PRKX PE=1 SV=1

Match to Query 35953: 1285.732528 from(643.873540,2+) rtinseconds(3468) index(48577)  
Title: Locus:1.1.1.2641.27  
Data file 2011-11-14 - TFD - EP 8-5.mgf

Click mouse within plot area to zoom in by factor of two about that point  
Or, Plot from  to  Da   
Label all possible matches  Label matches used for scoring

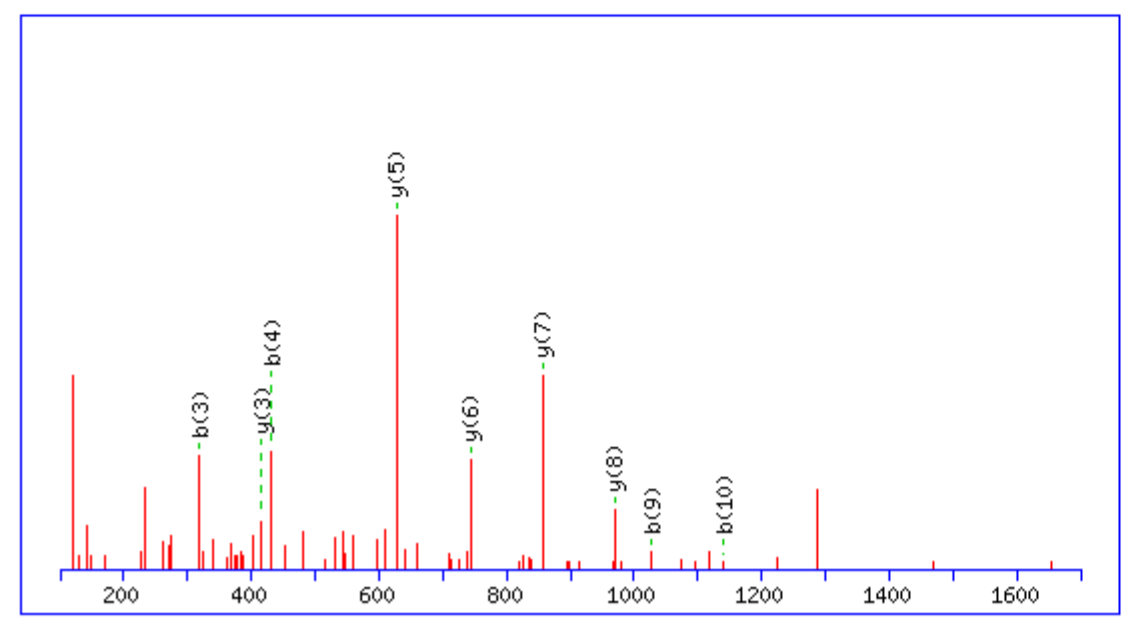

Monoisotopic mass of neutral peptide **Mr(calc): 1285.742783**  
Fixed modifications: Propionamide (C) (apply to specified residues or termini only)  
Variable modifications:  
P5 : Oxidation (P)  
Ions Score: 43 Expect: 0.00035  
Matches : 9/90 fragment ions using 12 most intense peaks ([help](#))

| #  | b                  | b <sup>++</sup> | b*          | b <sup>+++</sup> | b <sup>0</sup> | b <sup>0++</sup> | Seq. | y                 | y <sup>++</sup> | y*          | y <sup>+++</sup> | y <sup>0</sup> | y <sup>0++</sup> | #  |
|----|--------------------|-----------------|-------------|------------------|----------------|------------------|------|-------------------|-----------------|-------------|------------------|----------------|------------------|----|
| 1  | 100.075690         | 50.541483       |             |                  |                |                  | V    |                   |                 |             |                  |                |                  | 11 |
| 2  | 231.116175         | 116.061725      |             |                  |                |                  | M    | 1187.681656       | 594.344466      | 1170.655107 | 585.831192       | 1169.671091    | 585.339183       | 10 |
| 3  | <b>318.148203</b>  | 159.577740      |             |                  | 300.137638     | 150.572457       | S    | 1056.641171       | 528.824224      | 1039.614622 | 520.310949       | 1038.630606    | 519.818941       | 9  |
| 4  | <b>431.232267</b>  | 216.119772      |             |                  | 413.221702     | 207.114489       | I    | <b>969.609143</b> | 485.308210      | 952.582594  | 476.794935       | 951.598578     | 476.302927       | 8  |
| 5  | 544.279946         | 272.643611      |             |                  | 526.269381     | 263.638329       | P    | <b>856.525079</b> | 428.766178      | 839.498530  | 420.252903       | 838.514514     | 419.760895       | 7  |
| 6  | 659.306889         | 330.157083      |             |                  | 641.296324     | 321.151800       | D    | <b>743.477400</b> | 372.242338      | 726.450851  | 363.729064       | 725.466835     | 363.237056       | 6  |
| 7  | 758.375303         | 379.691290      |             |                  | 740.364738     | 370.686007       | V    | <b>628.450457</b> | 314.728867      | 611.423908  | 306.215592       |                |                  | 5  |
| 8  | 871.459367         | 436.233322      |             |                  | 853.448802     | 427.228039       | I    | 529.382043        | 265.194660      | 512.355494  | 256.681385       |                |                  | 4  |
| 9  | <b>1027.560478</b> | 514.283877      | 1010.533929 | 505.770603       | 1009.549913    | 505.278595       | R    | <b>416.297979</b> | 208.652627      | 399.271430  | 200.139353       |                |                  | 3  |
| 10 | <b>1140.644542</b> | 570.825909      | 1123.617993 | 562.312635       | 1122.633977    | 561.820627       | L    | 260.196868        | 130.602072      | 243.170319  | 122.088797       |                |                  | 2  |
| 11 |                    |                 |             |                  |                |                  | K    | 147.112804        | 74.060040       | 130.086255  | 65.546765        |                |                  | 1  |

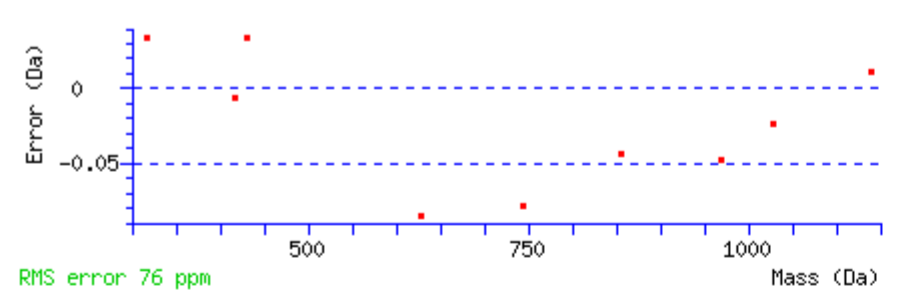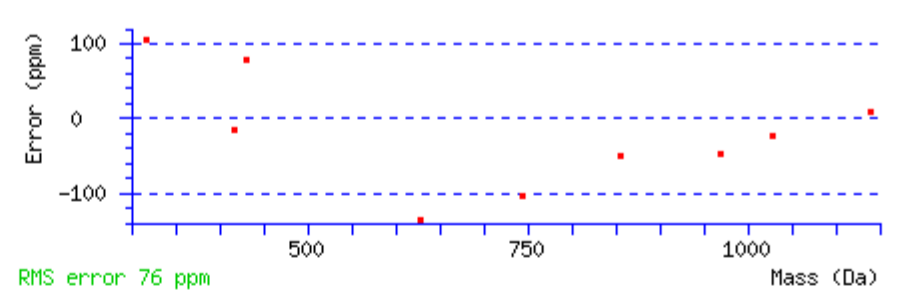

NCBI BLAST search of **VMSIPDVIRLK**  
(Parameters: blastp, nr protein database, expect=20000, no filter, PAM30)  
Other BLAST [web gateways](#)

**All matches to this query**

| Score | Mr(calc):   | Delta     | Sequence                     |
|-------|-------------|-----------|------------------------------|
| 43.0  | 1285.742783 | -0.010255 | <a href="#">VMSIPDVIRLK</a>  |
| 11.9  | 1285.742783 | -0.010255 | <a href="#">VMSIPDVIRLK</a>  |
| 4.0   | 1285.735367 | -0.002839 | <a href="#">SLELSVNLQRK</a>  |
| 2.7   | 1285.735367 | -0.002839 | <a href="#">QRTLQEALSLK</a>  |
| 2.2   | 1285.731537 | 0.000991  | <a href="#">ALDMSLPSLVLK</a> |



# MASCOT Search Results

## Peptide View

MS/MS Fragmentation of **IPNGEANVKK**

Found in **STK11\_HUMAN**, Serine/threonine-protein kinase STK11 OS=Homo sapiens GN=STK11 PE=1 SV=1

Match to Query 22302: 1084.582608 from(543.298580,2+) rtinseconds(2064) index(22221)

Title: Locus:1.1.1.2101.27

Data file 2011-11-10 - TFD - EP 4-5.mgf

Click mouse within plot area to zoom in by factor of two about that point

Or,  to  Da

Label all possible matches  Label matches used for scoring

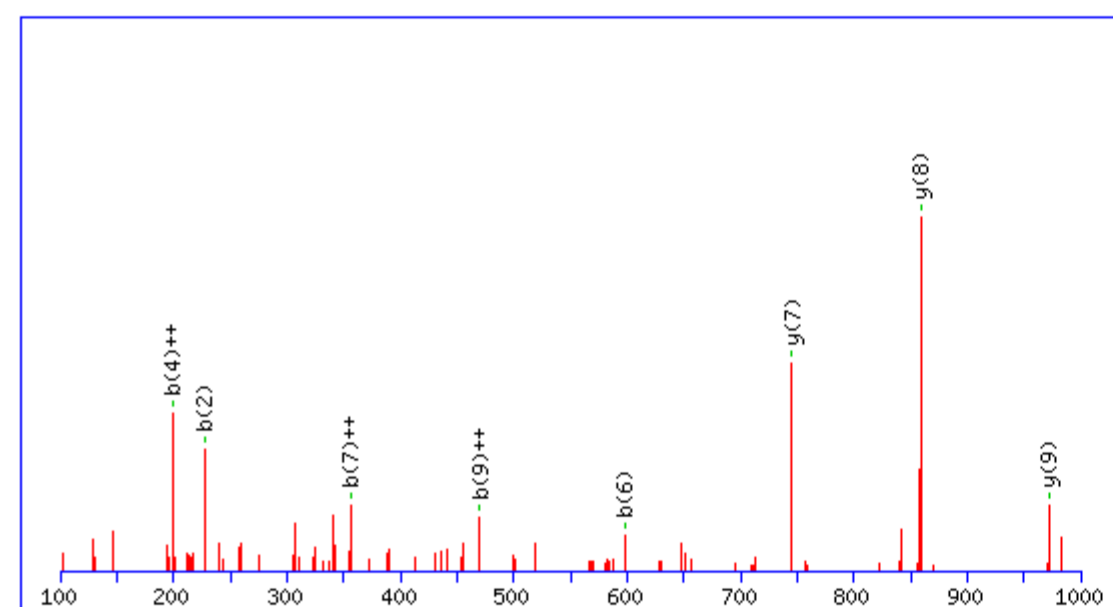

Monoisotopic mass of neutral peptide Mr(calc): 1084.587646

Fixed modifications: Propionamide (C) (apply to specified residues or termini only)

Variable modifications:

P2 : Oxidation (P)

Ions Score: 36 Expect: 0.0036

Matches : 8/86 fragment ions using 9 most intense peaks ([help](#))

| #  | b                 | b <sup>++</sup>   | b <sup>*</sup> | b <sup>*++</sup> | b <sup>0</sup> | b <sup>0++</sup> | Seq. | y                 | y <sup>++</sup> | y <sup>*</sup> | y <sup>*++</sup> | y <sup>0</sup> | y <sup>0++</sup> | #  |
|----|-------------------|-------------------|----------------|------------------|----------------|------------------|------|-------------------|-----------------|----------------|------------------|----------------|------------------|----|
| 1  | 114.091340        | 57.549308         |                |                  |                |                  | I    |                   |                 |                |                  |                |                  | 10 |
| 2  | <b>227.139019</b> | 114.073147        |                |                  |                |                  | P    | <b>972.510885</b> | 486.759081      | 955.484336     | 478.245806       | 954.500320     | 477.753798       | 9  |
| 3  | 341.181946        | 171.094611        | 324.155397     | 162.581336       |                |                  | N    | <b>859.463206</b> | 430.235241      | 842.436657     | 421.721967       | 841.452641     | 421.229959       | 8  |
| 4  | 398.203410        | <b>199.605343</b> | 381.176861     | 191.092068       |                |                  | G    | <b>745.420279</b> | 373.213778      | 728.393730     | 364.700503       | 727.409714     | 364.208495       | 7  |
| 5  | 527.246003        | 264.126640        | 510.219454     | 255.613365       | 509.235438     | 255.121357       | E    | 688.398815        | 344.703046      | 671.372266     | 336.189771       | 670.388250     | 335.697763       | 6  |
| 6  | <b>598.283117</b> | 299.645197        | 581.256568     | 291.131922       | 580.272552     | 290.639914       | A    | 559.356222        | 280.181749      | 542.329673     | 271.668475       |                |                  | 5  |
| 7  | 712.326044        | <b>356.666660</b> | 695.299495     | 348.153385       | 694.315479     | 347.661377       | N    | 488.319108        | 244.663192      | 471.292559     | 236.149918       |                |                  | 4  |
| 8  | 811.394458        | 406.200867        | 794.367909     | 397.687592       | 793.383893     | 397.195584       | V    | 374.276181        | 187.641729      | 357.249632     | 179.128454       |                |                  | 3  |
| 9  | 939.489421        | <b>470.248348</b> | 922.462872     | 461.735074       | 921.478856     | 461.243066       | K    | 275.207767        | 138.107522      | 258.181218     | 129.594247       |                |                  | 2  |
| 10 |                   |                   |                |                  |                |                  | K    | 147.112804        | 74.060040       | 130.086255     | 65.546766        |                |                  | 1  |

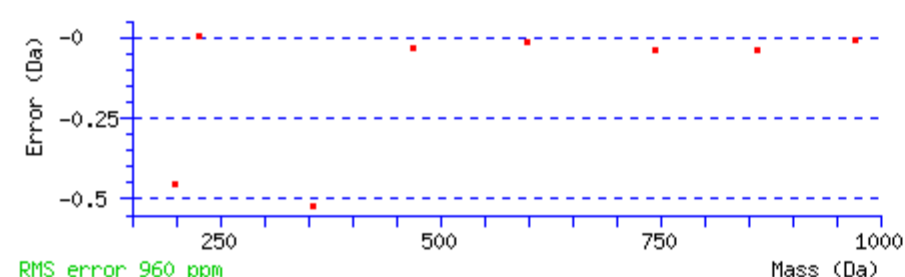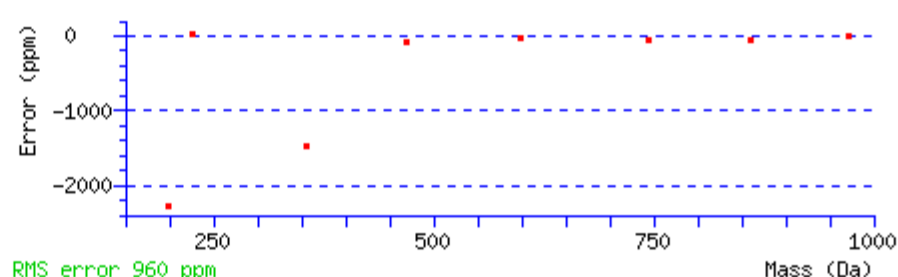

NCBI BLAST search of **IPNGEANVKK**

(Parameters: blastp, nr protein database, expect=20000, no filter, PAM30)

Other BLAST [web gateways](#)

## All matches to this query

| Score | Mr(calc):   | Delta     | Sequence                    |
|-------|-------------|-----------|-----------------------------|
| 35.6  | 1084.587646 | -0.005038 | <a href="#">IPNGEANVKK</a>  |
| 13.2  | 1084.587662 | -0.005054 | <a href="#">IPNKPTQQK</a>   |
| 13.0  | 1084.587646 | -0.005038 | <a href="#">IIEVNQNQK</a>   |
| 8.4   | 1084.587662 | -0.005054 | <a href="#">LLQDVDINR</a>   |
| 5.2   | 1084.580444 | 0.002164  | <a href="#">FLIDSIYSK</a>   |
| 2.9   | 1084.573730 | 0.008878  | <a href="#">AGRGKPGAEAR</a> |
| 2.7   | 1084.577286 | 0.005322  | <a href="#">LYMKLVMR</a>    |
| 2.2   | 1084.587662 | -0.005054 | <a href="#">GAVIQQSASK</a>  |
| 1.2   | 1084.591660 | -0.009052 | <a href="#">LSLAPAEAWK</a>  |
| 0.1   | 1084.573746 | 0.008862  | <a href="#">LPGRQTNQR</a>   |

# MASCOT SCIENCE Mascot Search Results

## Peptide View

MS/MS Fragmentation of **LGAAAADAVTGR**

Found in **WNK1\_HUMAN**, Serine/threonine-protein kinase WNK1 OS=Homo sapiens GN=WNK1 PE=1 SV=2

Match to Query 22108: 1071.570508 from(536.792530,2+) rtinseconds(1562) index(11202)

Title: Locus:1.1.1.1866.36

Data file 2011-11-14 - TFD - EP 8-6.mgf

Click mouse within plot area to zoom in by factor of two about that point

Or, Plot from  to  Da

Label all possible matches  Label matches used for scoring

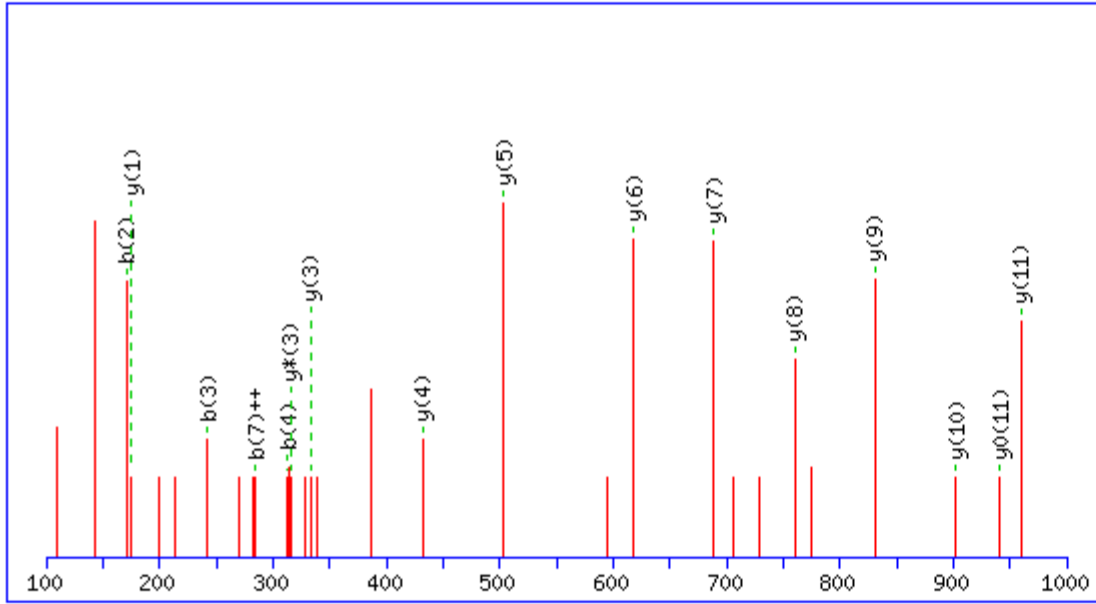

Monoisotopic mass of neutral peptide  $M_r(\text{calc})$ : 1071.567261

Fixed modifications: Propionamide (C) (apply to specified residues or termini only)

Ions Score: 74 Expect: 1.3e-006

Matches : 16/94 fragment ions using 29 most intense peaks [\(help\)](#)

| #  | b          | b <sup>++</sup> | b <sup>0</sup> | b <sup>0++</sup> | Seq. | y          | y <sup>++</sup> | y <sup>*</sup> | y <sup>*++</sup> | y <sup>0</sup> | y <sup>0++</sup> | #  |
|----|------------|-----------------|----------------|------------------|------|------------|-----------------|----------------|------------------|----------------|------------------|----|
| 1  | 114.091340 | 57.549308       |                |                  | L    |            |                 |                |                  |                |                  | 12 |
| 2  | 171.112804 | 86.060040       |                |                  | G    | 959.490486 | 480.248881      | 942.463937     | 471.735607       | 941.479921     | 471.243599       | 11 |
| 3  | 242.149918 | 121.578597      |                |                  | A    | 902.469022 | 451.738149      | 885.442473     | 443.224875       | 884.458457     | 442.732867       | 10 |
| 4  | 313.187032 | 157.097154      |                |                  | A    | 831.431908 | 416.219592      | 814.405359     | 407.706318       | 813.421343     | 407.214310       | 9  |
| 5  | 384.224146 | 192.615711      |                |                  | A    | 760.394794 | 380.701035      | 743.368245     | 372.187761       | 742.384229     | 371.695753       | 8  |
| 6  | 455.261260 | 228.134268      |                |                  | A    | 689.357680 | 345.182478      | 672.331131     | 336.669204       | 671.347115     | 336.177196       | 7  |
| 7  | 570.288203 | 285.647740      | 552.277638     | 276.642457       | D    | 618.320566 | 309.663921      | 601.294017     | 301.150647       | 600.310001     | 300.658639       | 6  |
| 8  | 641.325317 | 321.166296      | 623.314752     | 312.161014       | A    | 503.293623 | 252.150450      | 486.267074     | 243.637175       | 485.283058     | 243.145167       | 5  |
| 9  | 740.393731 | 370.700503      | 722.383166     | 361.695221       | V    | 432.256509 | 216.631893      | 415.229960     | 208.118618       | 414.245944     | 207.626610       | 4  |
| 10 | 841.441410 | 421.224343      | 823.430845     | 412.219060       | T    | 333.188095 | 167.097686      | 316.161546     | 158.584411       | 315.177530     | 158.092403       | 3  |
| 11 | 898.462874 | 449.735075      | 880.452309     | 440.729792       | G    | 232.140416 | 116.573846      | 215.113867     | 108.060572       |                |                  | 2  |
| 12 |            |                 |                |                  | R    | 175.118952 | 88.063114       | 158.092403     | 79.549840        |                |                  | 1  |

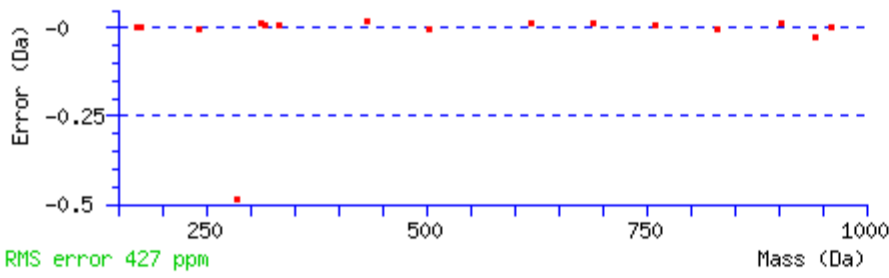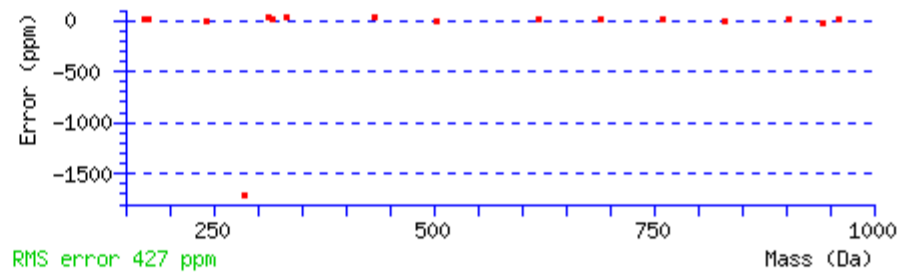

NCBI BLAST search of **LGAAAADAVTGR**

(Parameters: blastp, nr protein database, expect=20000, no filter, PAM30)

Other BLAST [web gateways](#)

## All matches to this query

| Score | $M_r(\text{calc})$ : | Delta    | Sequence                     |
|-------|----------------------|----------|------------------------------|
| 74.4  | 1071.567261          | 0.003247 | <a href="#">LGAAAADAVTGR</a> |
| 23.3  | 1071.567245          | 0.003263 | <a href="#">LQAKESPQR</a>    |

Mascot: <http://www.matrixscience.com/>

# MASCOT Search Results

## Peptide View

### MS/MS Fragmentation of VLPIMFPALYR

Found in **2A5D\_HUMAN**, Serine/threonine-protein phosphatase 2A 56 kDa regulatory subunit delta isoform OS=Homo sapiens GN=PPP2R5D PE=1 SV=1

Match to Query 38700: 1318.746568 from(660.380560,2+) rtinseconds(3967) index(58766)

Title: Locus:1.1.1.2923.23

Data file 2011-11-14 - TFD - EP 8-2.mgf

Click mouse within plot area to zoom in by factor of two about that point

Or, Plot from  to  Da

Label all possible matches  Label matches used for scoring

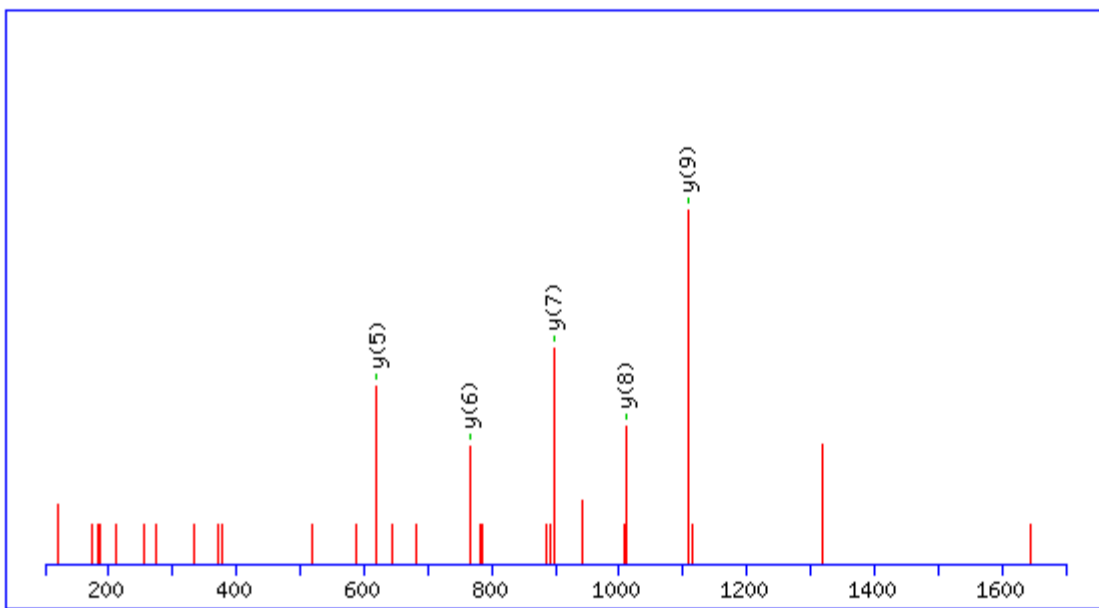

Monoisotopic mass of neutral peptide  $M_r(\text{calc})$ : 1318.747131

Fixed modifications: Propionamide (C) (apply to specified residues or termini only)

Ions Score: 32 Expect: 0.0027

Matches : 5/60 fragment ions using 9 most intense peaks ([help](#))

| #  | b           | b <sup>++</sup> | Seq. | y                  | y <sup>++</sup> | y <sup>*</sup> | y <sup>*++</sup> | #  |
|----|-------------|-----------------|------|--------------------|-----------------|----------------|------------------|----|
| 1  | 100.075690  | 50.541483       | V    |                    |                 |                |                  | 11 |
| 2  | 213.159754  | 107.083515      | L    | 1220.686014        | 610.846645      | 1203.659465    | 602.333371       | 10 |
| 3  | 310.212518  | 155.609897      | P    | <b>1107.601950</b> | 554.304613      | 1090.575401    | 545.791339       | 9  |
| 4  | 423.296582  | 212.151929      | I    | <b>1010.549186</b> | 505.778231      | 993.522637     | 497.264956       | 8  |
| 5  | 554.337067  | 277.672172      | M    | <b>897.465122</b>  | 449.236199      | 880.438573     | 440.722924       | 7  |
| 6  | 701.405481  | 351.206379      | F    | <b>766.424637</b>  | 383.715957      | 749.398088     | 375.202682       | 6  |
| 7  | 798.458245  | 399.732761      | P    | <b>619.356223</b>  | 310.181750      | 602.329674     | 301.668475       | 5  |
| 8  | 869.495359  | 435.251318      | A    | 522.303459         | 261.655368      | 505.276910     | 253.142093       | 4  |
| 9  | 982.579423  | 491.793350      | L    | 451.266345         | 226.136810      | 434.239796     | 217.623536       | 3  |
| 10 | 1145.642752 | 573.325014      | Y    | 338.182281         | 169.594778      | 321.155732     | 161.081504       | 2  |
| 11 |             |                 | R    | 175.118952         | 88.063114       | 158.092403     | 79.549839        | 1  |

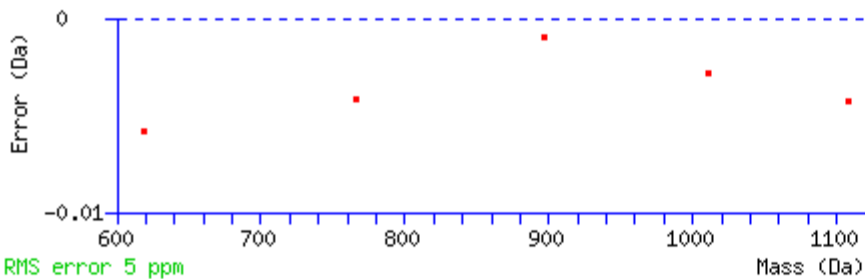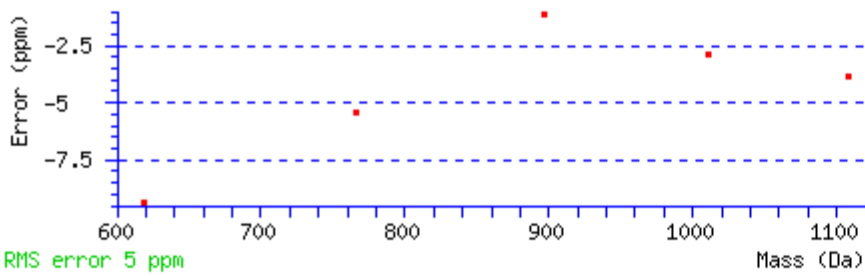

### NCBI BLAST search of VLPIMFPALYR

(Parameters: blastp, nr protein database, expect=20000, no filter, PAM30)

Other BLAST [web gateways](#)

### All matches to this query

| Score | $M_r(\text{calc})$ : | Delta     | Sequence                    |
|-------|----------------------|-----------|-----------------------------|
| 32.4  | 1318.747131          | -0.000563 | <a href="#">VLPIMFPALYR</a> |
| 1.2   | 1318.754349          | -0.007781 | <a href="#">VLGLRVCGLYR</a> |

# Mascot Search Results

## Peptide View

MS/MS Fragmentation of **YSFLQFDPAPR**

Found in **PP2AA\_HUMAN**, Serine/threonine-protein phosphatase 2A catalytic subunit alpha isoform OS=Homo sapiens GN=PPP2CA PE=1 SV=1

Match to Query 34434: 1339.648248 from(670.831400,2+) rtinseconds(3172) index(44641)

Title: Locus:1.1.1.1648.21

Data file 2012-01-27 - TFD - Epitel - IEC - 10ul - 3.mgf

Click mouse within plot area to zoom in by factor of two about that point

Or, Plot from  to  Da

Label all possible matches  Label matches used for scoring

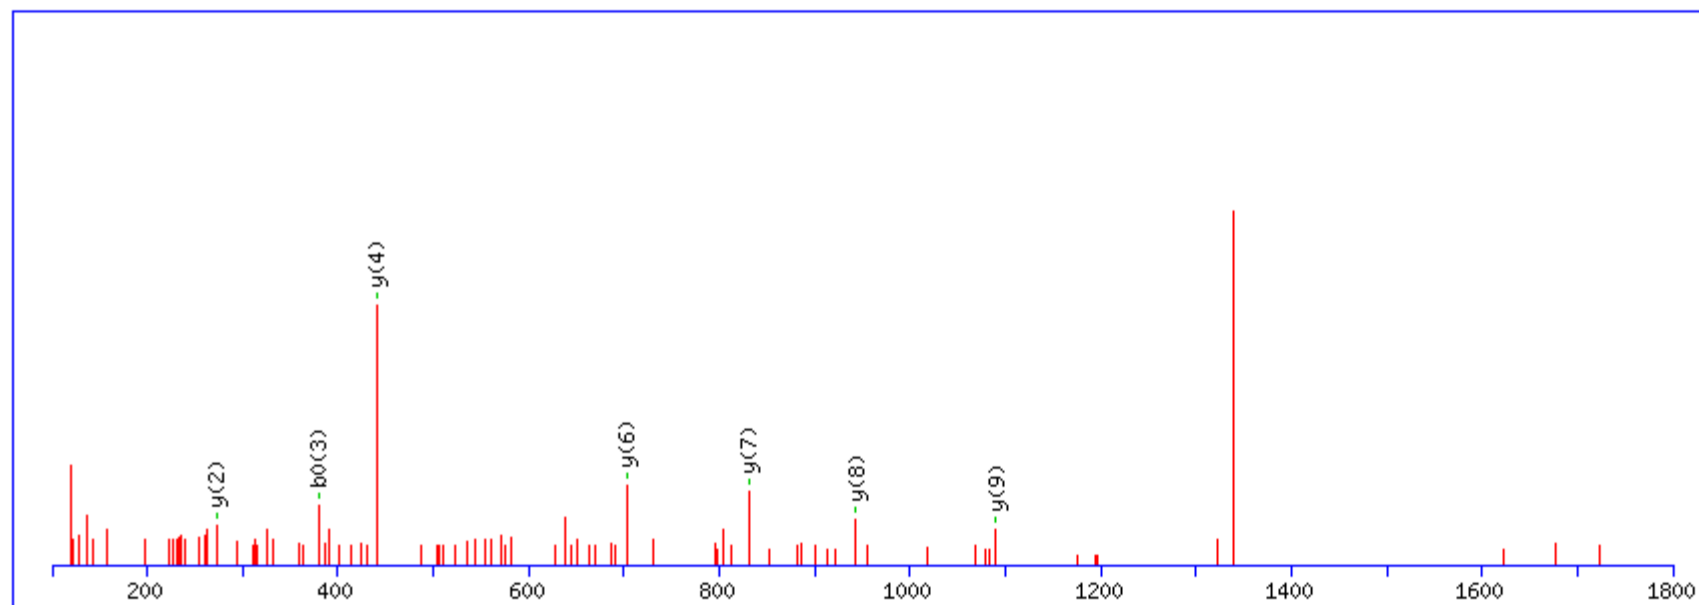

Monoisotopic mass of neutral peptide Mr(calc): 1339.656082

Fixed modifications: Carbamidomethyl (C) (apply to specified residues or termini only)

Ions Score: 34 Expect: 0.0046

Matches : 7/102 fragment ions using 12 most intense peaks ([help](#))

| #  | b           | b <sup>++</sup> | b <sup>*</sup> | b <sup>+++</sup> | b <sup>0</sup> | b <sup>0++</sup> | Seq. | y           | y <sup>++</sup> | y <sup>*</sup> | y <sup>+++</sup> | y <sup>0</sup> | y <sup>0++</sup> | #  |
|----|-------------|-----------------|----------------|------------------|----------------|------------------|------|-------------|-----------------|----------------|------------------|----------------|------------------|----|
| 1  | 164.070605  | 82.538940       |                |                  |                |                  | Y    |             |                 |                |                  |                |                  | 11 |
| 2  | 251.102633  | 126.054954      |                |                  | 233.092068     | 117.049672       | S    | 1177.600035 | 589.303655      | 1160.573486    | 580.790381       | 1159.589470    | 580.298373       | 10 |
| 3  | 398.171047  | 199.589161      |                |                  | 380.160482     | 190.583879       | F    | 1090.568007 | 545.787642      | 1073.541458    | 537.274367       | 1072.557442    | 536.782359       | 9  |
| 4  | 511.255111  | 256.131193      |                |                  | 493.244546     | 247.125911       | L    | 943.499593  | 472.253435      | 926.473044     | 463.740160       | 925.489028     | 463.248152       | 8  |
| 5  | 639.313689  | 320.160483      | 622.287140     | 311.647208       | 621.303124     | 311.155200       | Q    | 830.415529  | 415.711403      | 813.388980     | 407.198128       | 812.404964     | 406.706120       | 7  |
| 6  | 786.382103  | 393.694690      | 769.355554     | 385.181415       | 768.371538     | 384.689407       | F    | 702.356951  | 351.682114      | 685.330402     | 343.168839       | 684.346386     | 342.676831       | 6  |
| 7  | 901.409046  | 451.208161      | 884.382497     | 442.694887       | 883.398481     | 442.202879       | D    | 555.288537  | 278.147907      | 538.261988     | 269.634632       | 537.277972     | 269.142624       | 5  |
| 8  | 998.461810  | 499.734543      | 981.435261     | 491.221269       | 980.451245     | 490.729261       | P    | 440.261594  | 220.634435      | 423.235045     | 212.121160       |                |                  | 4  |
| 9  | 1069.498924 | 535.253100      | 1052.472375    | 526.739826       | 1051.488359    | 526.247818       | A    | 343.208830  | 172.108053      | 326.182281     | 163.594778       |                |                  | 3  |
| 10 | 1166.551688 | 583.779482      | 1149.525139    | 575.266208       | 1148.541123    | 574.774200       | P    | 272.171716  | 136.589496      | 255.145167     | 128.076221       |                |                  | 2  |
| 11 |             |                 |                |                  |                |                  | R    | 175.118952  | 88.063114       | 158.092403     | 79.549839        |                |                  | 1  |

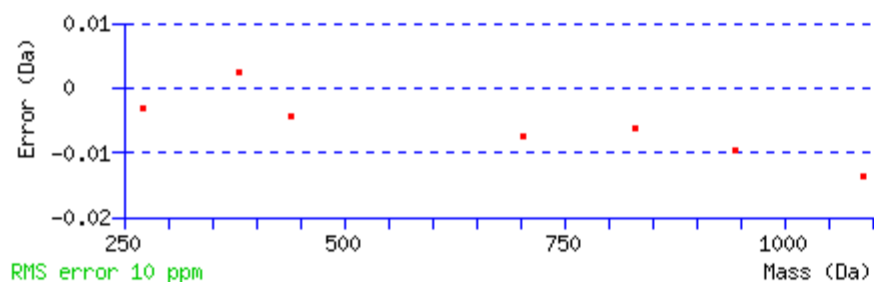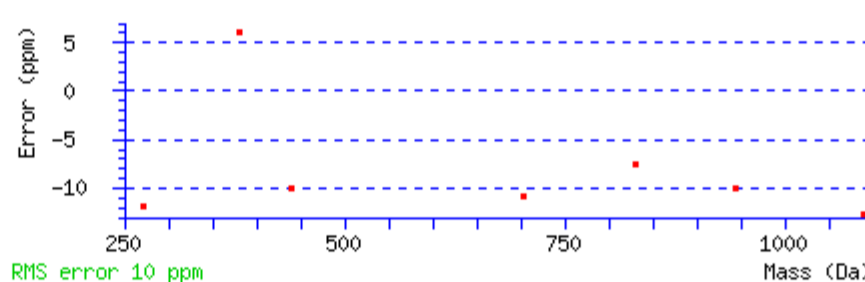

NCBI BLAST search of [YSFLQFDPAPR](#)

(Parameters: blastp, nr protein database, expect=20000, no filter, PAM30)

Other BLAST [web gateways](#)

All matches to this query

| Score | Mr(calc):   | Delta     | Sequence                    |
|-------|-------------|-----------|-----------------------------|
| 34.0  | 1339.656082 | -0.007834 | <a href="#">YSFLQFDPAPR</a> |

Mascot: <http://www.matrixscience.com/>

# Mascot Search Results

## Peptide View

MS/MS Fragmentation of **APLDLDKYVEIAR**

Found in **PPP6\_HUMAN**, Serine/threonine-protein phosphatase 6 catalytic subunit OS=Homo sapiens GN=PPP6C PE=1 SV=1

Match to Query 46978: 1501.818282 from(501.613370,3+) rtinseconds(3037) index(42546)

Title: Locus:1.1.1.2451.6

Data file 2011-11-12 - TFD - EP 6-4.mgf

Click mouse within plot area to zoom in by factor of two about that point

Or, Plot from  to  Da

Label all possible matches  Label matches used for scoring

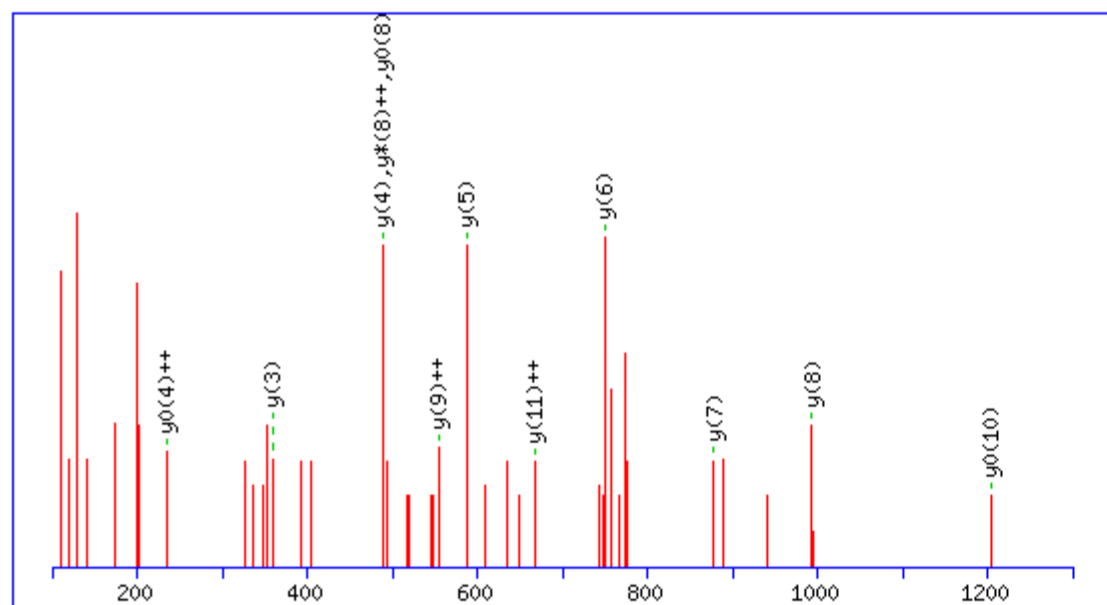

Monoisotopic mass of neutral peptide  $M_r(\text{calc})$ : 1501.814011

Fixed modifications: Propionamide (C) (apply to specified residues or termini only)

Ions Score: 32 Expect: 0.0053

Matches : 12/120 fragment ions using 18 most intense peaks [\(help\)](#)

| #  | b           | b <sup>++</sup> | b <sup>*</sup> | b <sup>*++</sup> | b <sup>0</sup> | b <sup>0++</sup> | Seq. | y           | y <sup>++</sup> | y <sup>*</sup> | y <sup>*++</sup> | y <sup>0</sup> | y <sup>0++</sup> | #  |
|----|-------------|-----------------|----------------|------------------|----------------|------------------|------|-------------|-----------------|----------------|------------------|----------------|------------------|----|
| 1  | 72.044390   | 36.525833       |                |                  |                |                  | A    |             |                 |                |                  |                |                  | 13 |
| 2  | 169.097154  | 85.052215       |                |                  |                |                  | P    | 1431.784207 | 716.395741      | 1414.757658    | 707.882467       | 1413.773642    | 707.390459       | 12 |
| 3  | 282.181218  | 141.594247      |                |                  |                |                  | L    | 1334.731443 | 667.869359      | 1317.704894    | 659.356085       | 1316.720878    | 658.864077       | 11 |
| 4  | 397.208161  | 199.107719      |                |                  | 379.197596     | 190.102436       | D    | 1221.647379 | 611.327327      | 1204.620830    | 602.814053       | 1203.636814    | 602.322045       | 10 |
| 5  | 510.292225  | 255.649751      |                |                  | 492.281660     | 246.644468       | L    | 1106.620436 | 553.813856      | 1089.593887    | 545.300582       | 1088.609871    | 544.808573       | 9  |
| 6  | 625.319168  | 313.163222      |                |                  | 607.308603     | 304.157940       | D    | 993.536372  | 497.271824      | 976.509823     | 488.758549       | 975.525807     | 488.266541       | 8  |
| 7  | 753.414131  | 377.210704      | 736.387582     | 368.697429       | 735.403566     | 368.205421       | K    | 878.509429  | 439.758352      | 861.482880     | 431.245078       | 860.498864     | 430.753070       | 7  |
| 8  | 916.477460  | 458.742368      | 899.450911     | 450.229094       | 898.466895     | 449.737086       | Y    | 750.414466  | 375.710871      | 733.387917     | 367.197596       | 732.403901     | 366.705588       | 6  |
| 9  | 1015.545874 | 508.276575      | 998.519325     | 499.763301       | 997.535309     | 499.271293       | V    | 587.351137  | 294.179206      | 570.324588     | 285.665932       | 569.340572     | 285.173924       | 5  |
| 10 | 1144.588467 | 572.797872      | 1127.561918    | 564.284597       | 1126.577902    | 563.792589       | E    | 488.282723  | 244.644999      | 471.256174     | 236.131725       | 470.272158     | 235.639717       | 4  |
| 11 | 1257.672531 | 629.339903      | 1240.645982    | 620.826629       | 1239.661966    | 620.334621       | I    | 359.240130  | 180.123703      | 342.213581     | 171.610428       |                |                  | 3  |
| 12 | 1328.709645 | 664.858460      | 1311.683096    | 656.345186       | 1310.699080    | 655.853178       | A    | 246.156066  | 123.581671      | 229.129517     | 115.068396       |                |                  | 2  |
| 13 |             |                 |                |                  |                |                  | R    | 175.118952  | 88.063114       | 158.092403     | 79.549839        |                |                  | 1  |

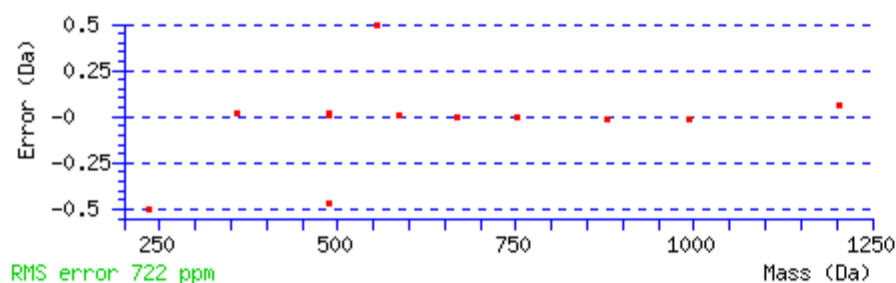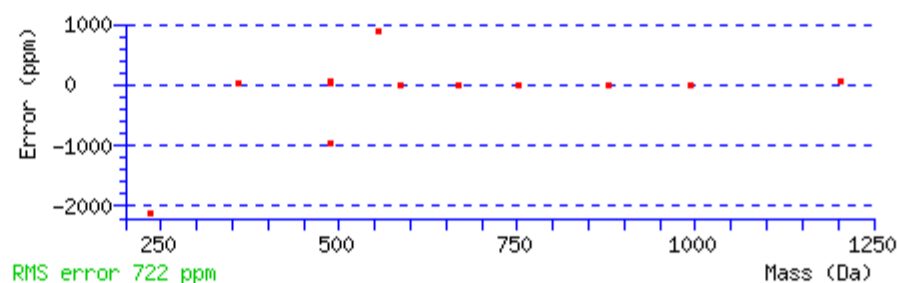

NCBI BLAST search of [APLDLDKYVEIAR](#)

(Parameters: blastp, nr protein database, expect=20000, no filter, PAM30)

Other BLAST [web gateways](#)

All matches to this query

| Score | $M_r(\text{calc})$ : | Delta    | Sequence                      |
|-------|----------------------|----------|-------------------------------|
| 32.4  | 1501.814011          | 0.004271 | <a href="#">APLDLDKYVEIAR</a> |

Mascot: <http://www.matrixscience.com/>

**Peptide View**

MS/MS Fragmentation of **NLINATNAALQTPLHVAAR**

Found in **ANR28\_HUMAN**, Serine/threonine-protein phosphatase 6 regulatory ankyrin repeat subunit A OS=Homo sapiens GN=ANKRD28 PE=1 SV=5

Match to Query 59623: 1987.098972 from(663.373600,3+) rtinseconds(2981) index(40185)

Title: Locus:1.1.1.2555.26

Data file 2011-11-10 - TFD - EP 3-1.mgf

Click mouse within plot area to zoom in by factor of two about that point

Or, Plot from  to  Da

Label all possible matches  Label matches used for scoring

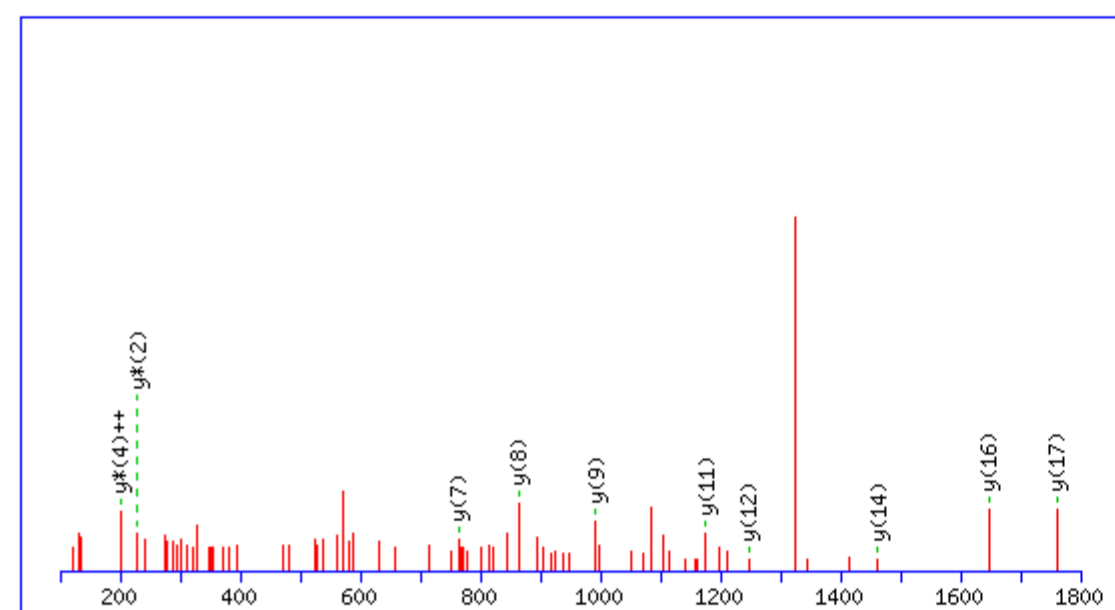

Monoisotopic mass of neutral peptide Mr(calc): 1987.096268

Fixed modifications: Propionamide (C) (apply to specified residues or termini only)

Ions Score: 48 Expect: 4.9e-005

Matches : 10/192 fragment ions using 16 most intense peaks [\(help\)](#)

| #  | b           | b <sup>++</sup> | b <sup>*</sup> | b <sup>+++</sup> | b <sup>0</sup> | b <sup>0++</sup> | Seq. | y                  | y <sup>++</sup> | y <sup>*</sup>    | y <sup>+++</sup>  | y <sup>0</sup> | y <sup>0++</sup> | #  |
|----|-------------|-----------------|----------------|------------------|----------------|------------------|------|--------------------|-----------------|-------------------|-------------------|----------------|------------------|----|
| 1  | 115.050203  | 58.028740       | 98.023654      | 49.515465        |                |                  | N    |                    |                 |                   |                   |                |                  | 19 |
| 2  | 228.134267  | 114.570771      | 211.107718     | 106.057497       |                |                  | L    | 1874.060658        | 937.533967      | 1857.034109       | 929.020693        | 1856.050093    | 928.528684       | 18 |
| 3  | 341.218331  | 171.112803      | 324.191782     | 162.599529       |                |                  | I    | <b>1760.976594</b> | 880.991935      | 1743.950045       | 872.478660        | 1742.966029    | 871.986652       | 17 |
| 4  | 455.261258  | 228.134267      | 438.234709     | 219.620993       |                |                  | N    | <b>1647.892530</b> | 824.449903      | 1630.865981       | 815.936628        | 1629.881965    | 815.444620       | 16 |
| 5  | 526.298372  | 263.652824      | 509.271823     | 255.139550       |                |                  | A    | 1533.849603        | 767.428439      | 1516.823054       | 758.915165        | 1515.839038    | 758.423157       | 15 |
| 6  | 627.346051  | 314.176664      | 610.319502     | 305.663389       | 609.335486     | 305.171381       | T    | <b>1462.812489</b> | 731.909882      | 1445.785940       | 723.396608        | 1444.801924    | 722.904600       | 14 |
| 7  | 741.388978  | 371.198127      | 724.362429     | 362.684853       | 723.378413     | 362.192845       | N    | 1361.764810        | 681.386043      | 1344.738261       | 672.872769        | 1343.754245    | 672.380760       | 13 |
| 8  | 812.426092  | 406.716684      | 795.399543     | 398.203410       | 794.415527     | 397.711402       | A    | <b>1247.721883</b> | 624.364579      | 1230.695334       | 615.851305        | 1229.711318    | 615.359297       | 12 |
| 9  | 883.463206  | 442.235241      | 866.436657     | 433.721967       | 865.452641     | 433.229959       | A    | <b>1176.684769</b> | 588.846022      | 1159.658220       | 580.332748        | 1158.674204    | 579.840740       | 11 |
| 10 | 996.547270  | 498.777273      | 979.520721     | 490.263999       | 978.536705     | 489.771991       | L    | 1105.647655        | 553.327466      | 1088.621106       | 544.814191        | 1087.637090    | 544.322183       | 10 |
| 11 | 1124.605848 | 562.806562      | 1107.579299    | 554.293288       | 1106.595283    | 553.801279       | Q    | <b>992.563591</b>  | 496.785433      | 975.537042        | 488.272159        | 974.553026     | 487.780151       | 9  |
| 12 | 1225.653527 | 613.330401      | 1208.626978    | 604.817127       | 1207.642962    | 604.325119       | T    | <b>864.505013</b>  | 432.756145      | 847.478464        | 424.242870        | 846.494448     | 423.750862       | 8  |
| 13 | 1322.706291 | 661.856784      | 1305.679742    | 653.343509       | 1304.695726    | 652.851501       | P    | <b>763.457334</b>  | 382.232305      | 746.430785        | 373.719030        |                |                  | 7  |
| 14 | 1435.790355 | 718.398815      | 1418.763806    | 709.885541       | 1417.779790    | 709.393533       | L    | 666.404570         | 333.705923      | 649.378021        | 325.192648        |                |                  | 6  |
| 15 | 1572.849267 | 786.928271      | 1555.822718    | 778.414997       | 1554.838702    | 777.922989       | H    | 553.320506         | 277.163891      | 536.293957        | 268.650617        |                |                  | 5  |
| 16 | 1671.917681 | 836.462478      | 1654.891132    | 827.949204       | 1653.907116    | 827.457196       | V    | 416.261594         | 208.634435      | 399.235045        | <b>200.121160</b> |                |                  | 4  |
| 17 | 1742.954795 | 871.981035      | 1725.928246    | 863.467761       | 1724.944230    | 862.975753       | A    | 317.193180         | 159.100228      | 300.166631        | 150.586953        |                |                  | 3  |
| 18 | 1813.991909 | 907.499592      | 1796.965360    | 898.986318       | 1795.981344    | 898.494310       | A    | 246.156066         | 123.581671      | <b>229.129517</b> | 115.068396        |                |                  | 2  |
| 19 |             |                 |                |                  |                |                  | R    | 175.118952         | 88.063114       | 158.092403        | 79.549839         |                |                  | 1  |

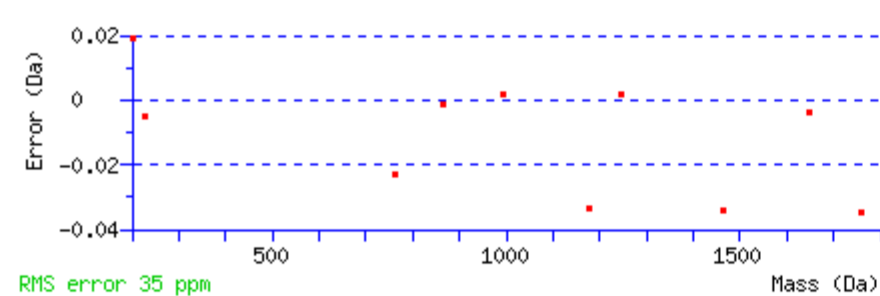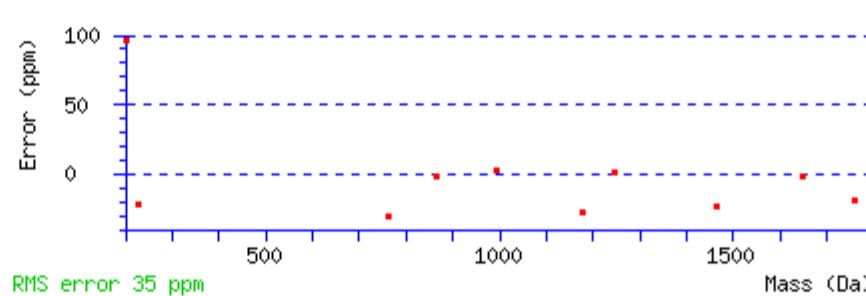

NCBI **BLAST** search of **NLINATNAALQTPLHVAAR**

(Parameters: blastp, nr protein database, expect=20000, no filter, PAM30)

Other BLAST [web gateways](#)

**All matches to this query**

| Score | Mr(calc):   | Delta    | Sequence                            |
|-------|-------------|----------|-------------------------------------|
| 48.4  | 1987.096268 | 0.002704 | <a href="#">NLINATNAALQTPLHVAAR</a> |

# **MASCOT** Mascot Search Results

## Peptide View

MS/MS Fragmentation of **KLIEFLLK**

Found in **PP6R3\_HUMAN**, Serine/threonine-protein phosphatase 6 regulatory subunit 3 OS=Homo sapiens GN=PPP6R3 PE=1 SV=2

Match to Query 9307: 1002.639188 from(502.326870,2+) rtinseconds(1697) index(4635)

Title: Locus:1.1.1.2294.14

Data file 2011-11-10 - TFD - EP 3-8.mgf

Click mouse within plot area to zoom in by factor of two about that point

Or, Plot from  to  Da

Label all possible matches  Label matches used for scoring

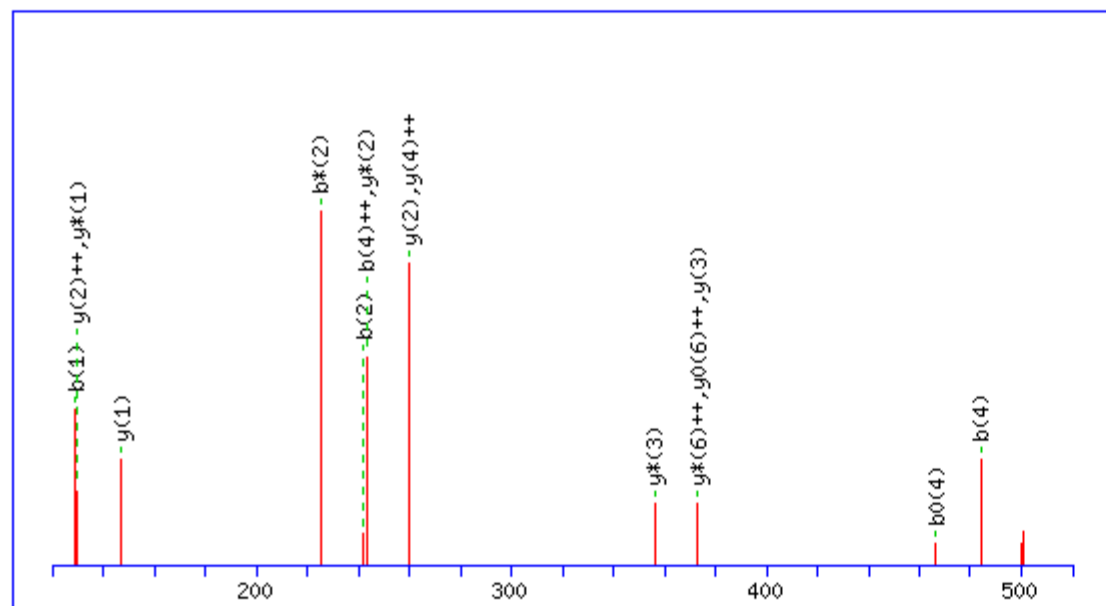

Monoisotopic mass of neutral peptide Mr(calc): 1002.647720

Fixed modifications: Propionamide (C) (apply to specified residues or termini only)

Ions Score: 32 Expect: 0.00062

Matches : 17/70 fragment ions using 13 most intense peaks [\(help\)](#)

| # | b                 | b <sup>++</sup>   | b <sup>*</sup>    | b <sup>*++</sup> | b <sup>0</sup>    | b <sup>0++</sup> | Seq.     | y                 | y <sup>++</sup>   | y <sup>*</sup>    | y <sup>*++</sup>  | y <sup>0</sup> | y <sup>0++</sup>  | #        |
|---|-------------------|-------------------|-------------------|------------------|-------------------|------------------|----------|-------------------|-------------------|-------------------|-------------------|----------------|-------------------|----------|
| 1 | <b>129.102239</b> | 65.054757         | 112.075690        | 56.541483        |                   |                  | <b>K</b> |                   |                   |                   |                   |                |                   | <b>8</b> |
| 2 | <b>242.186303</b> | 121.596790        | <b>225.159754</b> | 113.083515       |                   |                  | <b>L</b> | 875.560067        | 438.283672        | 858.533518        | 429.770397        | 857.549502     | 429.278389        | <b>7</b> |
| 3 | 355.270367        | 178.138822        | 338.243818        | 169.625547       |                   |                  | <b>I</b> | 762.476003        | 381.741640        | 745.449454        | <b>373.228365</b> | 744.465438     | <b>372.736357</b> | <b>6</b> |
| 4 | <b>484.312960</b> | <b>242.660118</b> | 467.286411        | 234.146844       | <b>466.302395</b> | 233.654836       | <b>E</b> | 649.391939        | 325.199608        | 632.365390        | 316.686333        | 631.381374     | 316.194325        | <b>5</b> |
| 5 | 631.381374        | 316.194325        | 614.354825        | 307.681051       | 613.370809        | 307.189043       | <b>F</b> | 520.349346        | <b>260.678311</b> | 503.322797        | 252.165037        |                |                   | <b>4</b> |
| 6 | 744.465438        | <b>372.736357</b> | 727.438889        | 364.223083       | 726.454873        | 363.731075       | <b>L</b> | <b>373.280932</b> | 187.144104        | <b>356.254383</b> | 178.630830        |                |                   | <b>3</b> |
| 7 | 857.549502        | 429.278389        | 840.522953        | 420.765115       | 839.538937        | 420.273107       | <b>L</b> | <b>260.196868</b> | <b>130.602072</b> | <b>243.170319</b> | 122.088798        |                |                   | <b>2</b> |
| 8 |                   |                   |                   |                  |                   |                  | <b>K</b> | <b>147.112804</b> | 74.060040         | <b>130.086255</b> | 65.546765         |                |                   | <b>1</b> |

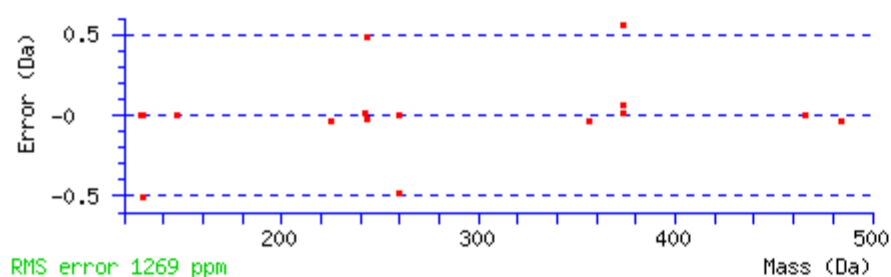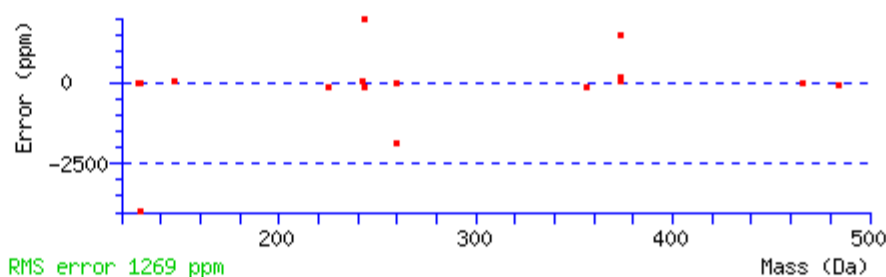

NCBI BLAST search of **KLIEFLLK**

(Parameters: blastp, nr protein database, expect=20000, no filter, PAM30)

Other BLAST [web gateways](#)

### All matches to this query

| Score | Mr(calc):   | Delta     | Sequence                  |
|-------|-------------|-----------|---------------------------|
| 32.1  | 1002.647720 | -0.008532 | <a href="#">KLIEFLLK</a>  |
| 17.0  | 1002.647720 | -0.008532 | <a href="#">LKLFEILK</a>  |
| 3.1   | 1002.647736 | -0.008548 | <a href="#">IFLLGLSIK</a> |

# **MASCOT** Mascot Search Results

## Peptide View

MS/MS Fragmentation of **TNSILFYGR**

Found in **SPB3\_HUMAN**, Serpin B3 OS=Homo sapiens GN=SERPINB3 PE=1 SV=2

Match to Query 14277: 1069.556128 from(535.785340,2+) rtinseconds(2555) index(15375)

Title: Locus:1.1.1.2695.7

Data file 2011-11-14 - TFD - EP 8-8.mgf

Click mouse within plot area to zoom in by factor of two about that point

Or, Plot from  to  Da

Label all possible matches  Label matches used for scoring

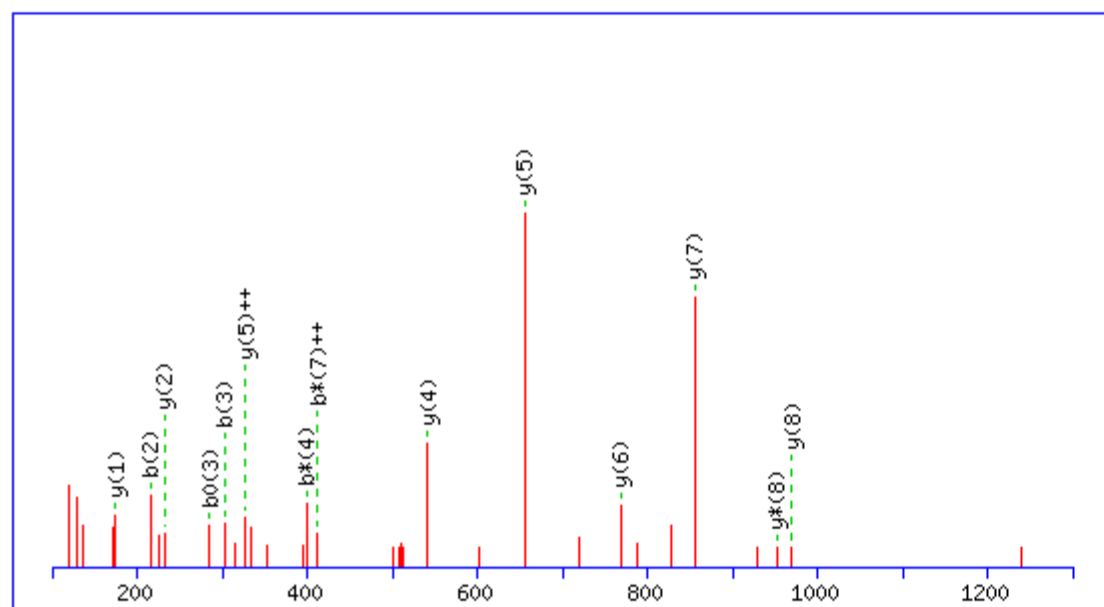

Monoisotopic mass of neutral peptide Mr(calc): 1069.555634

Fixed modifications: Propionamide (C) (apply to specified residues or termini only)

Ions Score: 43 Expect: 0.00046

Matches : 14/82 fragment ions using 28 most intense peaks [\(help\)](#)

| # | b                 | b <sup>++</sup> | b <sup>*</sup>    | b <sup>*++</sup>  | b <sup>0</sup>    | b <sup>0++</sup> | Seq. | y                 | y <sup>++</sup>   | y <sup>*</sup>    | y <sup>*++</sup> | y <sup>0</sup> | y <sup>0++</sup> | # |
|---|-------------------|-----------------|-------------------|-------------------|-------------------|------------------|------|-------------------|-------------------|-------------------|------------------|----------------|------------------|---|
| 1 | 102.054955        | 51.531116       |                   |                   | 84.044390         | 42.525833        | T    |                   |                   |                   |                  |                |                  | 9 |
| 2 | <b>216.097882</b> | 108.552579      | 199.071333        | 100.039305        | 198.087317        | 99.547296        | N    | <b>969.515242</b> | 485.261259        | <b>952.488693</b> | 476.747985       | 951.504677     | 476.255977       | 8 |
| 3 | <b>303.129910</b> | 152.068593      | 286.103361        | 143.555319        | <b>285.119345</b> | 143.063311       | S    | <b>855.472315</b> | 428.239796        | 838.445766        | 419.726521       | 837.461750     | 419.234513       | 7 |
| 4 | 416.213974        | 208.610625      | <b>399.187425</b> | 200.097351        | 398.203409        | 199.605343       | I    | <b>768.440287</b> | 384.723782        | 751.413738        | 376.210507       |                |                  | 6 |
| 5 | 529.298038        | 265.152657      | 512.271489        | 256.639383        | 511.287473        | 256.147375       | L    | <b>655.356223</b> | <b>328.181750</b> | 638.329674        | 319.668475       |                |                  | 5 |
| 6 | 676.366452        | 338.686864      | 659.339903        | 330.173589        | 658.355887        | 329.681581       | F    | <b>542.272159</b> | 271.639718        | 525.245610        | 263.126443       |                |                  | 4 |
| 7 | 839.429781        | 420.218529      | 822.403232        | <b>411.705254</b> | 821.419216        | 411.213246       | Y    | 395.203745        | 198.105511        | 378.177196        | 189.592236       |                |                  | 3 |
| 8 | 896.451245        | 448.729261      | 879.424696        | 440.215986        | 878.440680        | 439.723978       | G    | <b>232.140416</b> | 116.573846        | 215.113867        | 108.060572       |                |                  | 2 |
| 9 |                   |                 |                   |                   |                   |                  | R    | <b>175.118952</b> | 88.063114         | 158.092403        | 79.549840        |                |                  | 1 |

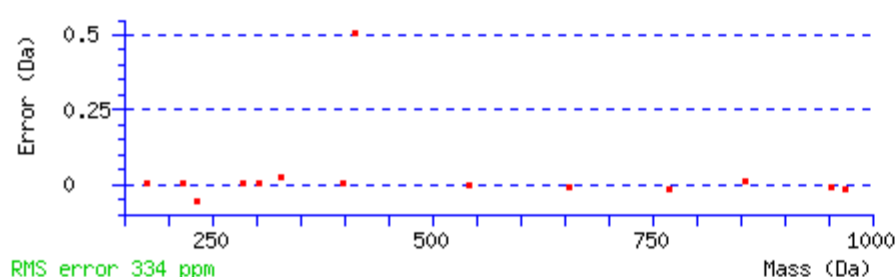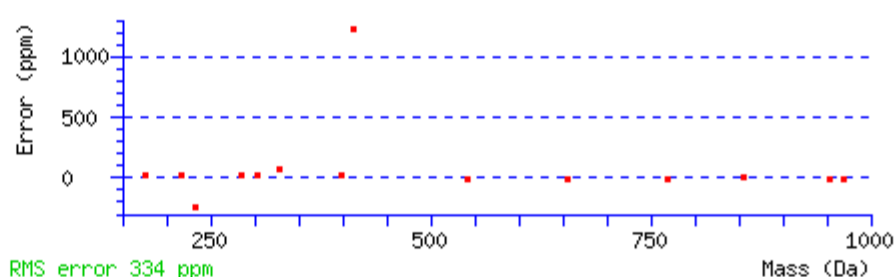

NCBI BLAST search of [TNSILFYGR](#)

(Parameters: blastp, nr protein database, expect=20000, no filter, PAM30)

Other BLAST [web gateways](#)

## All matches to this query

| Score | Mr(calc):   | Delta    | Sequence                   |
|-------|-------------|----------|----------------------------|
| 42.9  | 1069.555634 | 0.000494 | <a href="#">TNSILFYGR</a>  |
| 6.8   | 1069.551620 | 0.004508 | <a href="#">TPLSTGNPQR</a> |
| 5.7   | 1069.551590 | 0.004538 | <a href="#">QSSKLNEHK</a>  |
| 0.4   | 1069.555618 | 0.000510 | <a href="#">FYQSEIKR</a>   |
| 0.0   | 1069.551590 | 0.004538 | <a href="#">EPRALAEPR</a>  |



**MATRIX SCIENCE Mascot Search Results**

**Peptide View**

MS/MS Fragmentation of **SFFSFLGEAFD GAR**

Found in **SAA\_HUMAN**, Serum amyloid A protein OS=Homo sapiens GN=SAA1 PE=1 SV=2

Match to Query 45994: 1549.720128 from(775.867340,2+) rtinseconds(4471) index(69035)

Title: Locus:1.1.1.2070.27

Data file 2012-01-27 - TFD - Epitel - IEC - 10ul - 2.mgf

Click mouse within plot area to zoom in by factor of two about that point

Or, Plot from 100 to 1700 Da Full range

Label all possible matches  Label matches used for scoring

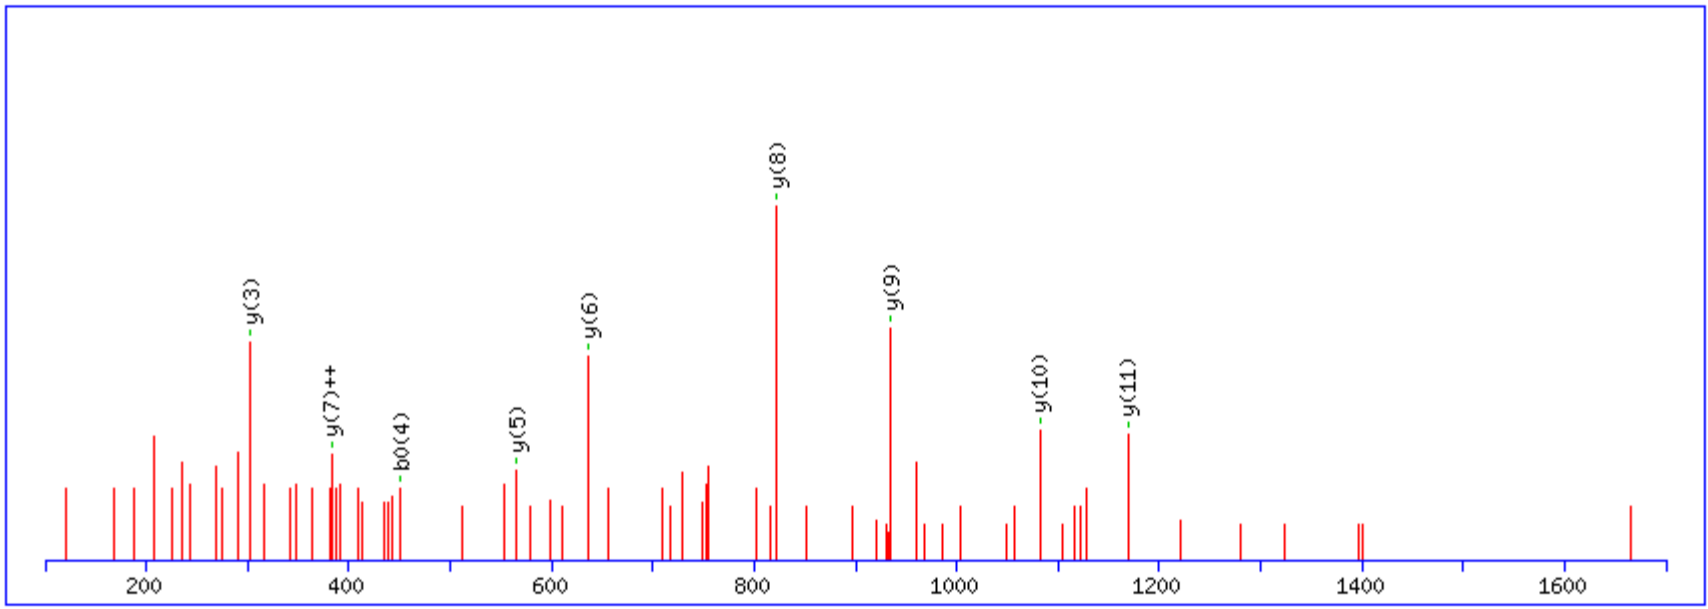

Monoisotopic mass of neutral peptide Mr(calc): 1549.720154

Fixed modifications: Carbamidomethyl (C) (apply to specified residues or termini only)

Ions Score: 44 Expect: 0.0005

Matches : 9/124 fragment ions using 13 most intense peaks (help)

| #  | b           | b <sup>++</sup> | b <sup>0</sup> | b <sup>0++</sup> | Seq. | y           | y <sup>++</sup> | y <sup>*</sup> | y <sup>*++</sup> | y <sup>0</sup> | y <sup>0++</sup> | #  |
|----|-------------|-----------------|----------------|------------------|------|-------------|-----------------|----------------|------------------|----------------|------------------|----|
| 1  | 88.039304   | 44.523290       | 70.028739      | 35.518008        | S    |             |                 |                |                  |                |                  | 14 |
| 2  | 235.107718  | 118.057497      | 217.097153     | 109.052214       | F    | 1463.695392 | 732.351334      | 1446.668843    | 723.838059       | 1445.684827    | 723.346051       | 13 |
| 3  | 382.176132  | 191.591704      | 364.165567     | 182.586422       | F    | 1316.626978 | 658.817127      | 1299.600429    | 650.303853       | 1298.616413    | 649.811845       | 12 |
| 4  | 469.208160  | 235.107718      | 451.197595     | 226.102435       | S    | 1169.558564 | 585.282920      | 1152.532015    | 576.769646       | 1151.547999    | 576.277637       | 11 |
| 5  | 616.276574  | 308.641925      | 598.266009     | 299.636642       | F    | 1082.526536 | 541.766906      | 1065.499987    | 533.253632       | 1064.515971    | 532.761624       | 10 |
| 6  | 729.360638  | 365.183957      | 711.350073     | 356.178675       | L    | 935.458122  | 468.232699      | 918.431573     | 459.719425       | 917.447557     | 459.227417       | 9  |
| 7  | 786.382102  | 393.694689      | 768.371537     | 384.689407       | G    | 822.374058  | 411.690667      | 805.347509     | 403.177393       | 804.363493     | 402.685385       | 8  |
| 8  | 915.424695  | 458.215986      | 897.414130     | 449.210703       | E    | 765.352594  | 383.179935      | 748.326045     | 374.666660       | 747.342029     | 374.174652       | 7  |
| 9  | 986.461809  | 493.734543      | 968.451244     | 484.729260       | A    | 636.310001  | 318.658639      | 619.283452     | 310.145364       | 618.299436     | 309.653356       | 6  |
| 10 | 1133.530223 | 567.268750      | 1115.519658    | 558.263467       | F    | 565.272887  | 283.140082      | 548.246338     | 274.626807       | 547.262322     | 274.134799       | 5  |
| 11 | 1248.557166 | 624.782221      | 1230.546601    | 615.776939       | D    | 418.204473  | 209.605874      | 401.177924     | 201.092600       | 400.193908     | 200.600592       | 4  |
| 12 | 1305.578630 | 653.292953      | 1287.568065    | 644.287670       | G    | 303.177530  | 152.092403      | 286.150981     | 143.579128       |                |                  | 3  |
| 13 | 1376.615744 | 688.811510      | 1358.605179    | 679.806227       | A    | 246.156066  | 123.581671      | 229.129517     | 115.068396       |                |                  | 2  |
| 14 |             |                 |                |                  | R    | 175.118952  | 88.063114       | 158.092403     | 79.549839        |                |                  | 1  |

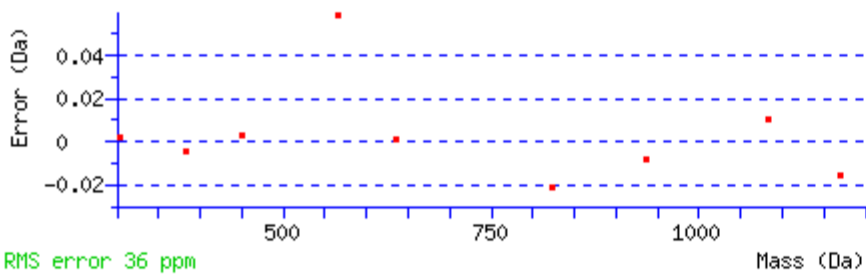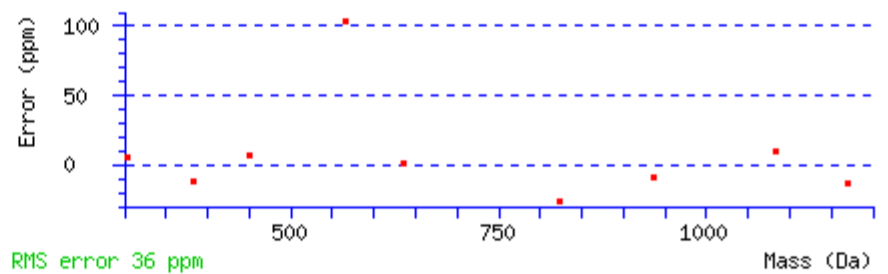

NCBI BLAST search of **SFFSFLGEAFD GAR**

(Parameters: blastp, nr protein database, expect=20000, no filter, PAM30)

Other BLAST [web gateways](#)

**All matches to this query**

| Score | Mr(calc):   | Delta     | Sequence                        |
|-------|-------------|-----------|---------------------------------|
| 44.1  | 1549.720154 | -0.000026 | <a href="#">SFFSFLGEAFD GAR</a> |

# MASCOT Search Results

## Peptide View

### MS/MS Fragmentation of LAQGSPAVAR

Found in **SPD2A\_HUMAN**, SH3 and PX domain-containing protein 2A OS=Homo sapiens GN=SH3PXD2A PE=1 SV=1

Match to Query 13419: 968.530908 from(485.272730,2+) rtinseconds(967) index(2468)

Title: Locus:1.1.1.1723.23

Data file 2011-11-10 - TFD - EP 4-1.mgf

Click mouse within plot area to zoom in by factor of two about that point

Or, Plot from  to  Da

Label all possible matches  Label matches used for scoring

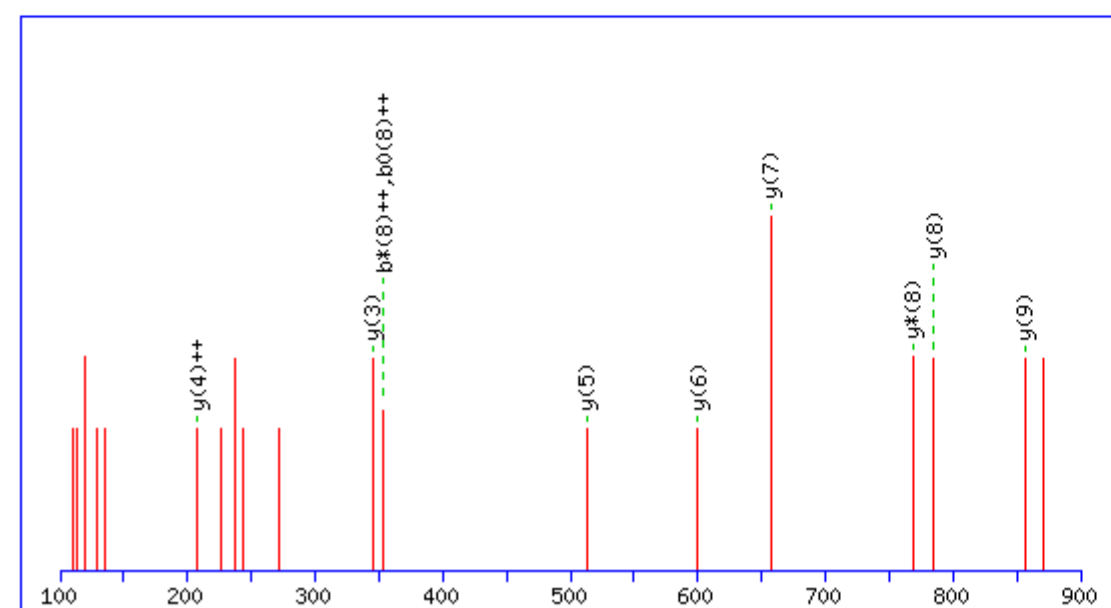

Monoisotopic mass of neutral peptide Mr(calc): 968.540314

Fixed modifications: Propionamide (C) (apply to specified residues or termini only)

Ions Score: 39 Expect: 0.0025

Matches : 10/86 fragment ions using 14 most intense peaks [\(help\)](#)

| #  | b          | b <sup>++</sup> | b <sup>*</sup> | b <sup>*++</sup> | b <sup>0</sup> | b <sup>0++</sup> | Seq. | y          | y <sup>++</sup> | y <sup>*</sup> | y <sup>*++</sup> | y <sup>0</sup> | y <sup>0++</sup> | #  |
|----|------------|-----------------|----------------|------------------|----------------|------------------|------|------------|-----------------|----------------|------------------|----------------|------------------|----|
| 1  | 114.091340 | 57.549308       |                |                  |                |                  | L    |            |                 |                |                  |                |                  | 10 |
| 2  | 185.128454 | 93.067865       |                |                  |                |                  | A    | 856.463542 | 428.735409      | 839.436993     | 420.222135       | 838.452977     | 419.730127       | 9  |
| 3  | 313.187032 | 157.097154      | 296.160483     | 148.583879       |                |                  | Q    | 785.426428 | 393.216852      | 768.399879     | 384.703578       | 767.415863     | 384.211570       | 8  |
| 4  | 370.208496 | 185.607886      | 353.181947     | 177.094611       |                |                  | G    | 657.367850 | 329.187563      | 640.341301     | 320.674289       | 639.357285     | 320.182281       | 7  |
| 5  | 457.240524 | 229.123900      | 440.213975     | 220.610626       | 439.229959     | 220.118618       | S    | 600.346386 | 300.676831      | 583.319837     | 292.163557       | 582.335821     | 291.671549       | 6  |
| 6  | 554.293288 | 277.650282      | 537.266739     | 269.137008       | 536.282723     | 268.645000       | P    | 513.314358 | 257.160817      | 496.287809     | 248.647543       |                |                  | 5  |
| 7  | 625.330402 | 313.168839      | 608.303853     | 304.655565       | 607.319837     | 304.163557       | A    | 416.261594 | 208.634435      | 399.235045     | 200.121160       |                |                  | 4  |
| 8  | 724.398816 | 362.703046      | 707.372267     | 354.189772       | 706.388251     | 353.697764       | V    | 345.224480 | 173.115878      | 328.197931     | 164.602603       |                |                  | 3  |
| 9  | 795.435930 | 398.221603      | 778.409381     | 389.708328       | 777.425365     | 389.216320       | A    | 246.156066 | 123.581671      | 229.129517     | 115.068397       |                |                  | 2  |
| 10 |            |                 |                |                  |                |                  | R    | 175.118952 | 88.063114       | 158.092403     | 79.549840        |                |                  | 1  |

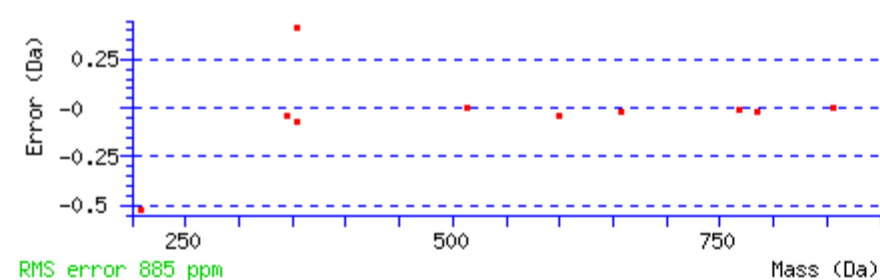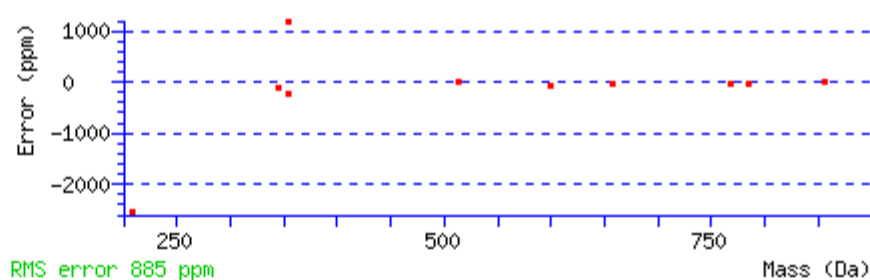

### NCBI BLAST search of LAQGSPAVAR

(Parameters: blastp, nr protein database, expect=20000, no filter, PAM30)

Other BLAST [web gateways](#)

### All matches to this query

| Score | Mr(calc):  | Delta     | Sequence                   |
|-------|------------|-----------|----------------------------|
| 39.1  | 968.540314 | -0.009406 | <a href="#">LAQGSPAVAR</a> |
| 12.7  | 968.529099 | 0.001809  | <a href="#">VPDQKGTPK</a>  |
| 7.5   | 968.540314 | -0.009406 | <a href="#">SPKPSGLQR</a>  |
| 7.0   | 968.529068 | 0.001840  | <a href="#">LAANPDPKK</a>  |
| 6.0   | 968.529068 | 0.001840  | <a href="#">LAANPDPKK</a>  |
| 6.0   | 968.529083 | 0.001825  | <a href="#">IATQPTNPK</a>  |
| 2.6   | 968.533112 | -0.002204 | <a href="#">LASFLGFSK</a>  |
| 2.0   | 968.540314 | -0.009406 | <a href="#">IRDSLPPR</a>   |

# Mascot Search Results

## Peptide View

MS/MS Fragmentation of **ELSN<sup>+</sup>TAA<sup>+</sup>YQSVR**

Found in **SIAE\_HUMAN**, Sialate O-acetyltransferase OS=Homo sapiens GN=SIAE PE=1 SV=1

Match to Query 38168: 1337.655108 from(669.834830,2+) rtinseconds(1654) index(14442)

Title: Locus:1.1.1.1945.48

Data file 2011-11-10 - TFD - EP 4-5.mgf

Click mouse within plot area to zoom in by factor of two about that point

Or, Plot from  to  Da

Label all possible matches  Label matches used for scoring

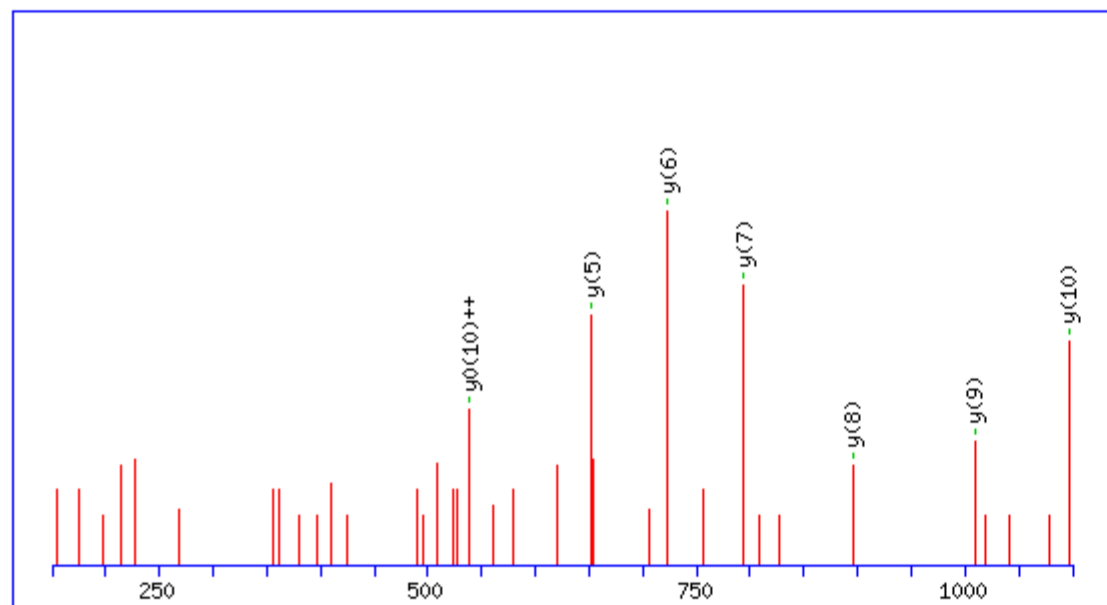

Monoisotopic mass of neutral peptide Mr(calc): 1337.657516

Fixed modifications: Propionamide (C) (apply to specified residues or termini only)

Ions Score: 45 Expect: 6.9e-005

Matches: 7/122 fragment ions using 10 most intense peaks ([help](#))

| #  | b           | b <sup>++</sup> | b <sup>*</sup> | b <sup>*++</sup> | b <sup>0</sup> | b <sup>0++</sup> | Seq. | y                  | y <sup>++</sup> | y <sup>*</sup> | y <sup>*++</sup> | y <sup>0</sup> | y <sup>0++</sup>  | #  |
|----|-------------|-----------------|----------------|------------------|----------------|------------------|------|--------------------|-----------------|----------------|------------------|----------------|-------------------|----|
| 1  | 130.049869  | 65.528572       |                |                  | 112.039304     | 56.523290        | E    |                    |                 |                |                  |                |                   | 12 |
| 2  | 243.133933  | 122.070605      |                |                  | 225.123368     | 113.065322       | L    | 1209.622227        | 605.314752      | 1192.595678    | 596.801477       | 1191.611662    | 596.309469        | 11 |
| 3  | 330.165961  | 165.586618      |                |                  | 312.155396     | 156.581336       | S    | <b>1096.538163</b> | 548.772719      | 1079.511614    | 540.259445       | 1078.527598    | <b>539.767437</b> | 10 |
| 4  | 444.208888  | 222.608082      | 427.182339     | 214.094808       | 426.198323     | 213.602800       | N    | <b>1009.506135</b> | 505.256706      | 992.479586     | 496.743431       | 991.495570     | 496.251423        | 9  |
| 5  | 545.256567  | 273.131922      | 528.230018     | 264.618647       | 527.246002     | 264.126639       | T    | <b>895.463208</b>  | 448.235242      | 878.436659     | 439.721967       | 877.452643     | 439.229959        | 8  |
| 6  | 616.293681  | 308.650479      | 599.267132     | 300.137204       | 598.283116     | 299.645196       | A    | <b>794.415529</b>  | 397.711403      | 777.388980     | 389.198128       | 776.404964     | 388.706120        | 7  |
| 7  | 687.330795  | 344.169036      | 670.304246     | 335.655761       | 669.320230     | 335.163753       | A    | <b>723.378415</b>  | 362.192846      | 706.351866     | 353.679571       | 705.367850     | 353.187563        | 6  |
| 8  | 850.394124  | 425.700700      | 833.367575     | 417.187425       | 832.383559     | 416.695417       | Y    | <b>652.341301</b>  | 326.674289      | 635.314752     | 318.161014       | 634.330736     | 317.669006        | 5  |
| 9  | 978.452702  | 489.729989      | 961.426153     | 481.216714       | 960.442137     | 480.724706       | Q    | 489.277972         | 245.142624      | 472.251423     | 236.629349       | 471.267407     | 236.137341        | 4  |
| 10 | 1065.484730 | 533.246003      | 1048.458181    | 524.732729       | 1047.474165    | 524.240720       | S    | 361.219394         | 181.113335      | 344.192845     | 172.600060       | 343.208829     | 172.108052        | 3  |
| 11 | 1164.553144 | 582.780210      | 1147.526595    | 574.266936       | 1146.542579    | 573.774927       | V    | 274.187366         | 137.597321      | 257.160817     | 129.084047       |                |                   | 2  |
| 12 |             |                 |                |                  |                |                  | R    | 175.118952         | 88.063114       | 158.092403     | 79.549839        |                |                   | 1  |

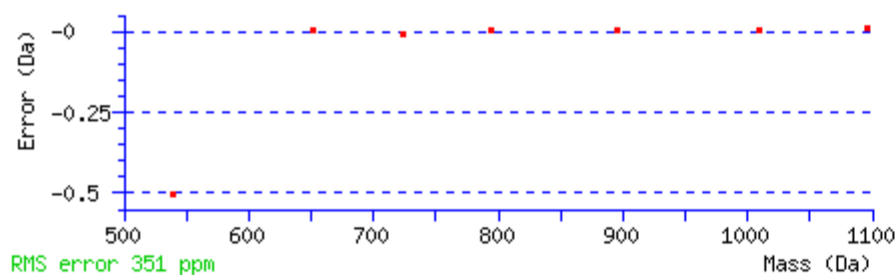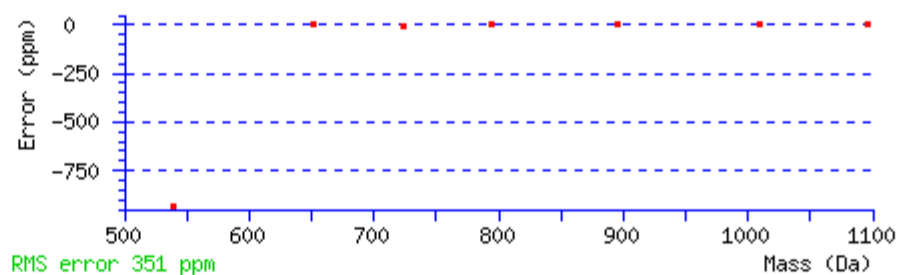

NCBI BLAST search of [ELSN<sup>+</sup>TAA<sup>+</sup>YQSVR](#)

(Parameters: blastp, nr protein database, expect=20000, no filter, PAM30)

Other BLAST [web gateways](#)

All matches to this query

| Score | Mr(calc):   | Delta     | Sequence                                             |
|-------|-------------|-----------|------------------------------------------------------|
| 44.8  | 1337.657516 | -0.002408 | <a href="#">ELSN<sup>+</sup>TAA<sup>+</sup>YQSVR</a> |
| 0.4   | 1337.651016 | 0.004092  | <a href="#">MAAGPAPPPGRPR</a>                        |
| 0.4   | 1337.651016 | 0.004092  | <a href="#">MAAGPAPPPGRPR</a>                        |
| 0.1   | 1337.651016 | 0.004092  | <a href="#">MAAGPAPPPGRPR</a>                        |

Mascot: <http://www.matrixscience.com/>

# **MASCOT** Mascot Search Results

## Peptide View

MS/MS Fragmentation of **ALVDTSCSSNR**

Found in **SKT\_HUMAN**, Sickle tail protein homolog OS=Homo sapiens GN=SKT PE=1 SV=2

Match to Query 22499: 1208.546588 from(605.280570,2+) rtinseconds(1030) index(4297)

Title: Locus:1.1.1.775.38

Data file 2012-01-27 - TFD - Epitel - IEC - 10ul - 2.mgf

Click mouse within plot area to zoom in by factor of two about that point

Or, Plot from  to  Da

Label all possible matches  Label matches used for scoring

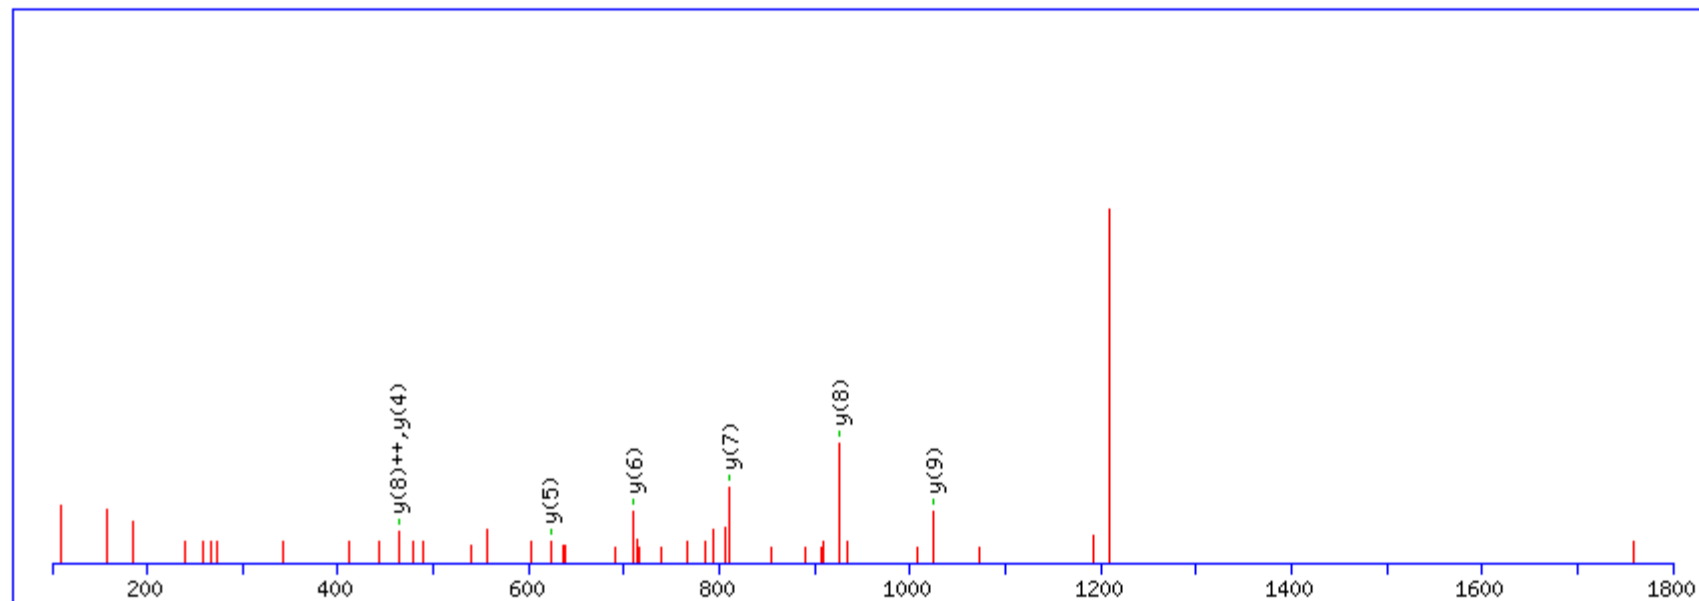

Monoisotopic mass of neutral peptide Mr(calc): 1208.545547

Fixed modifications: Carbamidomethyl (C) (apply to specified residues or termini only)

Ions Score: 43 Expect: 0.00046

Matches : 7/92 fragment ions using 11 most intense peaks ([help](#))

| #  | b           | b <sup>++</sup> | b <sup>*</sup> | b <sup>*++</sup> | b <sup>0</sup> | b <sup>0++</sup> | Seq. | y                  | y <sup>++</sup>   | y <sup>*</sup> | y <sup>*++</sup> | y <sup>0</sup> | y <sup>0++</sup> | #  |
|----|-------------|-----------------|----------------|------------------|----------------|------------------|------|--------------------|-------------------|----------------|------------------|----------------|------------------|----|
| 1  | 72.044390   | 36.525833       |                |                  |                |                  | A    |                    |                   |                |                  |                |                  | 11 |
| 2  | 185.128454  | 93.067865       |                |                  |                |                  | L    | 1138.515712        | 569.761494        | 1121.489163    | 561.248220       | 1120.505147    | 560.756212       | 10 |
| 3  | 284.196868  | 142.602072      |                |                  |                |                  | V    | <b>1025.431648</b> | 513.219462        | 1008.405099    | 504.706188       | 1007.421083    | 504.214180       | 9  |
| 4  | 399.223811  | 200.115544      |                |                  | 381.213246     | 191.110261       | D    | <b>926.363234</b>  | <b>463.685255</b> | 909.336685     | 455.171981       | 908.352669     | 454.679973       | 8  |
| 5  | 500.271490  | 250.639383      |                |                  | 482.260925     | 241.634101       | T    | <b>811.336291</b>  | 406.171784        | 794.309742     | 397.658509       | 793.325726     | 397.166501       | 7  |
| 6  | 587.303518  | 294.155397      |                |                  | 569.292953     | 285.150115       | S    | <b>710.288612</b>  | 355.647944        | 693.262063     | 347.134670       | 692.278047     | 346.642662       | 6  |
| 7  | 747.334167  | 374.170722      |                |                  | 729.323602     | 365.165439       | C    | <b>623.256584</b>  | 312.131930        | 606.230035     | 303.618656       | 605.246019     | 303.126648       | 5  |
| 8  | 834.366195  | 417.686736      |                |                  | 816.355630     | 408.681453       | S    | <b>463.225935</b>  | 232.116605        | 446.199386     | 223.603331       | 445.215370     | 223.111323       | 4  |
| 9  | 921.398223  | 461.202750      |                |                  | 903.387658     | 452.197467       | S    | 376.193907         | 188.600591        | 359.167358     | 180.087317       | 358.183342     | 179.595309       | 3  |
| 10 | 1035.441150 | 518.224213      | 1018.414601    | 509.710939       | 1017.430585    | 509.218931       | N    | 289.161879         | 145.084577        | 272.135330     | 136.571303       |                |                  | 2  |
| 11 |             |                 |                |                  |                |                  | R    | 175.118952         | 88.063114         | 158.092403     | 79.549839        |                |                  | 1  |

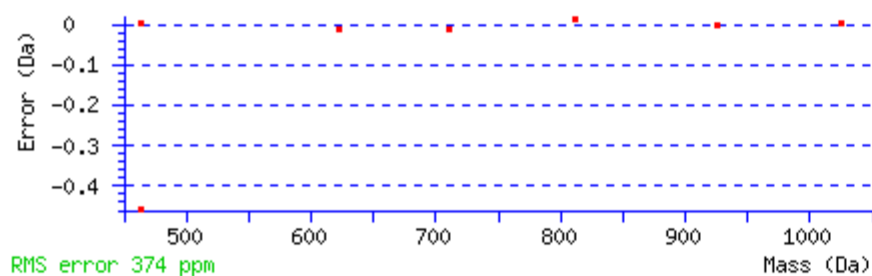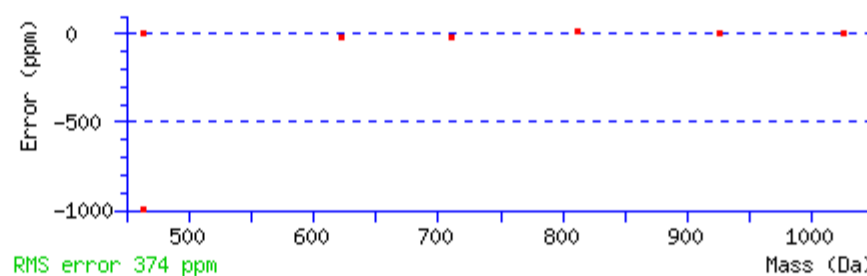

NCBI BLAST search of [ALVDTSCSSNR](#)

(Parameters: blastp, nr protein database, expect=20000, no filter, PAM30)

Other BLAST [web gateways](#)

All matches to this query

| Score | Mr(calc):   | Delta    | Sequence                    |
|-------|-------------|----------|-----------------------------|
| 43.2  | 1208.545547 | 0.001041 | <a href="#">ALVDTSCSSNR</a> |

Mascot: <http://www.matrixscience.com/>

# **MATRIX** SCIENCE Mascot Search Results

## Peptide View

MS/MS Fragmentation of **VGEIVVFR**

Found in **SC11A\_HUMAN**, Signal peptidase complex catalytic subunit SEC11A OS=Homo sapiens GN=SEC11A PE=1 SV=1

Match to Query 4802: 917.527828 from(459.771190,2+) rtinseconds(2305) index(28467)

Title: Locus:1.1.1.1259.8

Data file 2012-01-27 - TFD - Epitel - IEC - 10ul - 2.mgf

Click mouse within plot area to zoom in by factor of two about that point

Or, Plot from  to  Da

Label all possible matches  Label matches used for scoring

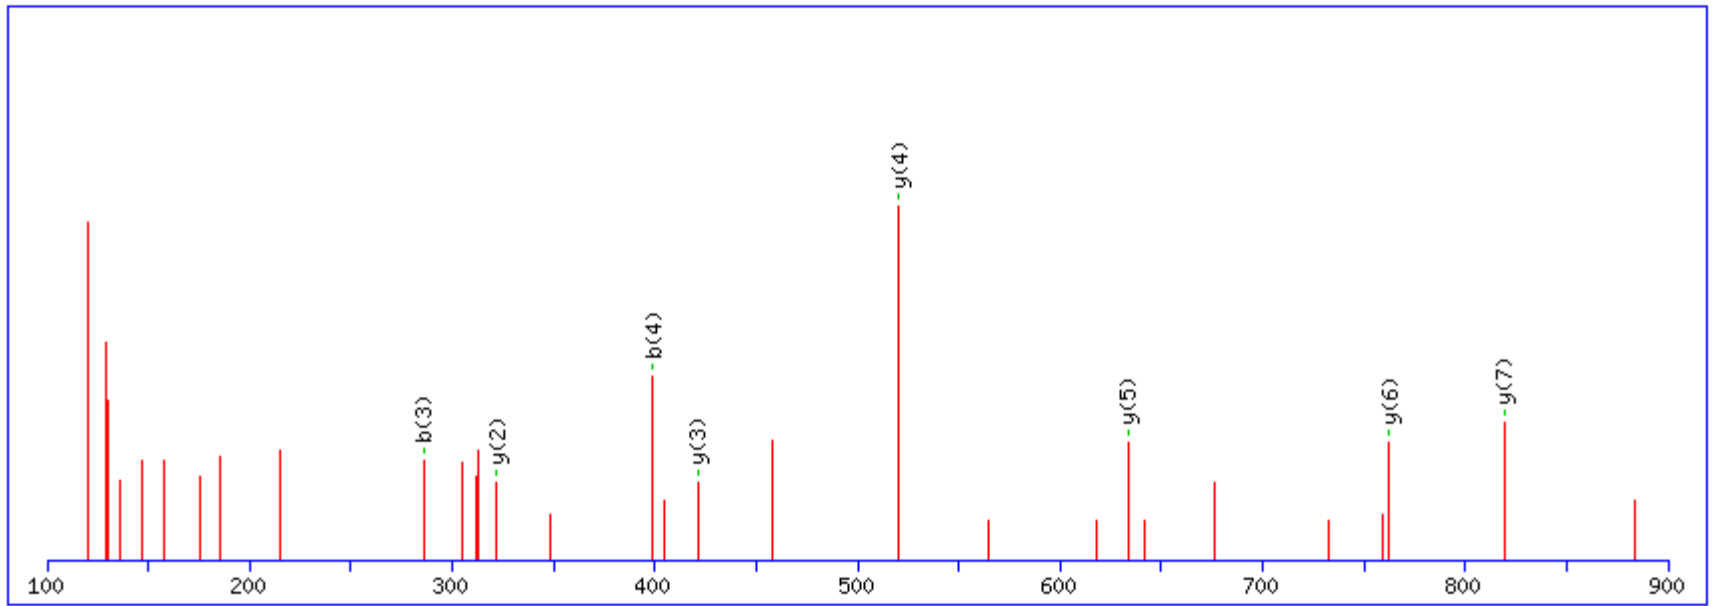

Monoisotopic mass of neutral peptide Mr(calc): 917.533463

Fixed modifications: Carbamidomethyl (C) (apply to specified residues or termini only)

Ions Score: 43 Expect: 0.00023

Matches : 8/56 fragment ions using 15 most intense peaks [\(help\)](#)

| # | b          | b <sup>++</sup> | b <sup>0</sup> | b <sup>0++</sup> | Seq. | y          | y <sup>++</sup> | y <sup>*</sup> | y <sup>*++</sup> | y <sup>0</sup> | y <sup>0++</sup> | # |
|---|------------|-----------------|----------------|------------------|------|------------|-----------------|----------------|------------------|----------------|------------------|---|
| 1 | 100.075690 | 50.541483       |                |                  | V    |            |                 |                |                  |                |                  | 8 |
| 2 | 157.097154 | 79.052215       |                |                  | G    | 819.472315 | 410.239796      | 802.445766     | 401.726521       | 801.461750     | 401.234513       | 7 |
| 3 | 286.139747 | 143.573512      | 268.129182     | 134.568229       | E    | 762.450851 | 381.729064      | 745.424302     | 373.215789       | 744.440286     | 372.723781       | 6 |
| 4 | 399.223811 | 200.115544      | 381.213246     | 191.110261       | I    | 633.408258 | 317.207767      | 616.381709     | 308.694493       |                |                  | 5 |
| 5 | 498.292225 | 249.649751      | 480.281660     | 240.644468       | V    | 520.324194 | 260.665735      | 503.297645     | 252.152461       |                |                  | 4 |
| 6 | 597.360639 | 299.183958      | 579.350074     | 290.178675       | V    | 421.255780 | 211.131528      | 404.229231     | 202.618253       |                |                  | 3 |
| 7 | 744.429053 | 372.718165      | 726.418488     | 363.712882       | F    | 322.187366 | 161.597321      | 305.160817     | 153.084046       |                |                  | 2 |
| 8 |            |                 |                |                  | R    | 175.118952 | 88.063114       | 158.092403     | 79.549839        |                |                  | 1 |

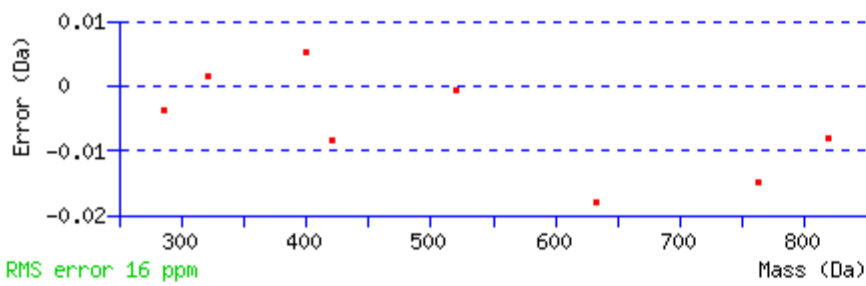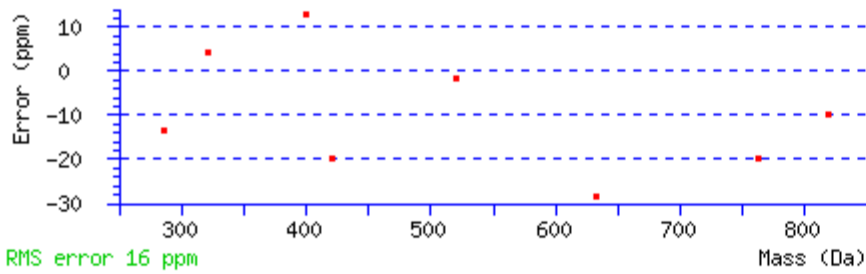

NCBI BLAST search of **VGEIVVFR**

(Parameters: blastp, nr protein database, expect=20000, no filter, PAM30)

Other BLAST [web gateways](#)

All matches to this query

| Score | Mr(calc):  | Delta     | Sequence                 |
|-------|------------|-----------|--------------------------|
| 43.3  | 917.533463 | -0.005635 | <a href="#">VGEIVVFR</a> |
| 4.2   | 917.525574 | 0.002254  | <a href="#">VSLVLEKM</a> |

# MASCOT Search Results

## Peptide View

MS/MS Fragmentation of **GDLLFLTNR**

Found in **SC11C\_HUMAN**, Signal peptidase complex catalytic subunit SEC11C OS=Homo sapiens GN=SEC11C PE=1 SV=3

Match to Query 29986: 1194.639608 from(598.327080,2+) rtinseconds(3767) index(51504)

Title: Locus:1.1.1.2583.6

Data file 2011-11-12 - TFD - EP 6-6.mgf

Click mouse within plot area to zoom in by factor of two about that point

Or, Plot from  to  Da

Label all possible matches  Label matches used for scoring

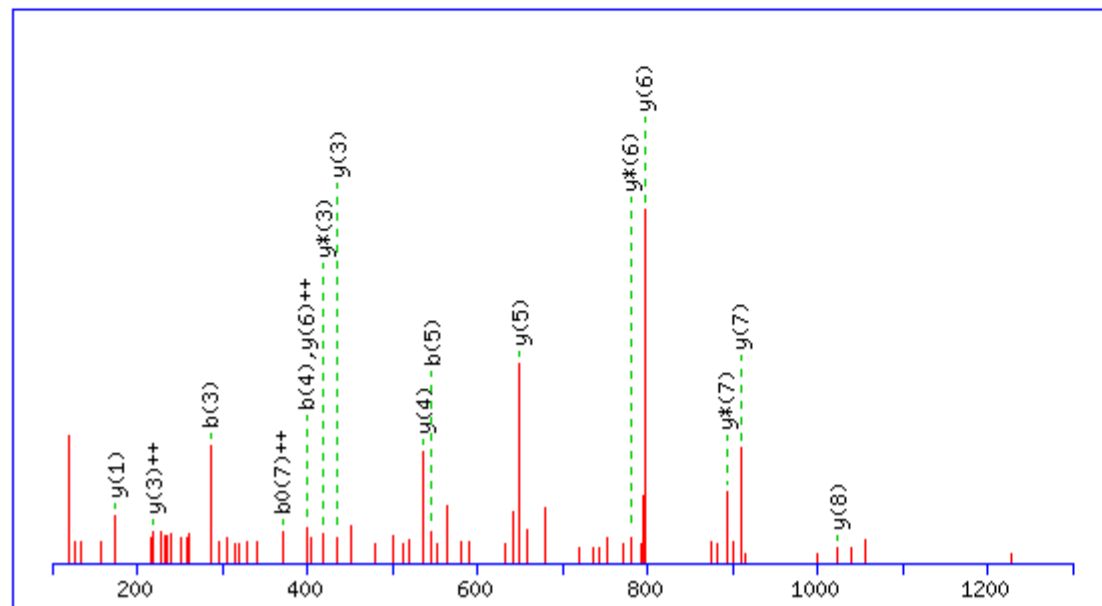

Monoisotopic mass of neutral peptide Mr(calc): 1194.639709

Fixed modifications: Propionamide (C) (apply to specified residues or termini only)

Ions Score: 43 Expect: 0.00051

Matches : 16/86 fragment ions using 28 most intense peaks ([help](#))

| #  | b                 | b <sup>++</sup> | b <sup>*</sup> | b <sup>*++</sup> | b <sup>0</sup> | b <sup>0++</sup>  | Seq.     | y                  | y <sup>++</sup>   | y <sup>*</sup>    | y <sup>*++</sup> | y <sup>0</sup> | y <sup>0++</sup> | #  |
|----|-------------------|-----------------|----------------|------------------|----------------|-------------------|----------|--------------------|-------------------|-------------------|------------------|----------------|------------------|----|
| 1  | 58.028740         | 29.518008       |                |                  |                |                   | <b>G</b> |                    |                   |                   |                  |                |                  | 10 |
| 2  | 173.055683        | 87.031479       |                |                  | 155.045118     | 78.026197         | <b>D</b> | 1138.625521        | 569.816399        | 1121.598972       | 561.303124       | 1120.614956    | 560.811116       | 9  |
| 3  | <b>286.139747</b> | 143.573512      |                |                  | 268.129182     | 134.568229        | <b>L</b> | <b>1023.598578</b> | 512.302927        | 1006.572029       | 503.789653       | 1005.588013    | 503.297645       | 8  |
| 4  | <b>399.223811</b> | 200.115544      |                |                  | 381.213246     | 191.110261        | <b>L</b> | <b>910.514514</b>  | 455.760895        | <b>893.487965</b> | 447.247621       | 892.503949     | 446.755613       | 7  |
| 5  | <b>546.292225</b> | 273.649751      |                |                  | 528.281660     | 264.644468        | <b>F</b> | <b>797.430450</b>  | <b>399.218863</b> | <b>780.403901</b> | 390.705589       | 779.419885     | 390.213581       | 6  |
| 6  | 659.376289        | 330.191783      |                |                  | 641.365724     | 321.186500        | <b>L</b> | <b>650.362036</b>  | 325.684656        | 633.335487        | 317.171382       | 632.351471     | 316.679374       | 5  |
| 7  | 760.423968        | 380.715622      |                |                  | 742.413403     | <b>371.710340</b> | <b>T</b> | <b>537.277972</b>  | 269.142624        | 520.251423        | 260.629350       | 519.267407     | 260.137342       | 4  |
| 8  | 874.466895        | 437.737086      | 857.440346     | 429.223811       | 856.456330     | 428.731803        | <b>N</b> | <b>436.230293</b>  | <b>218.618784</b> | <b>419.203744</b> | 210.105510       |                |                  | 3  |
| 9  | 1021.535309       | 511.271293      | 1004.508760    | 502.758018       | 1003.524744    | 502.266010        | <b>F</b> | 322.187366         | 161.597321        | 305.160817        | 153.084047       |                |                  | 2  |
| 10 |                   |                 |                |                  |                |                   | <b>R</b> | <b>175.118952</b>  | 88.063114         | 158.092403        | 79.549840        |                |                  | 1  |

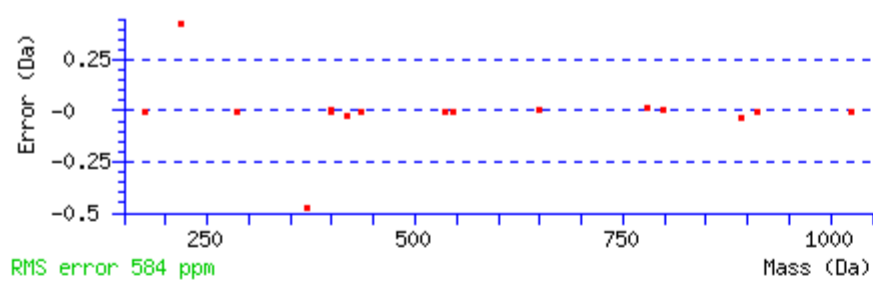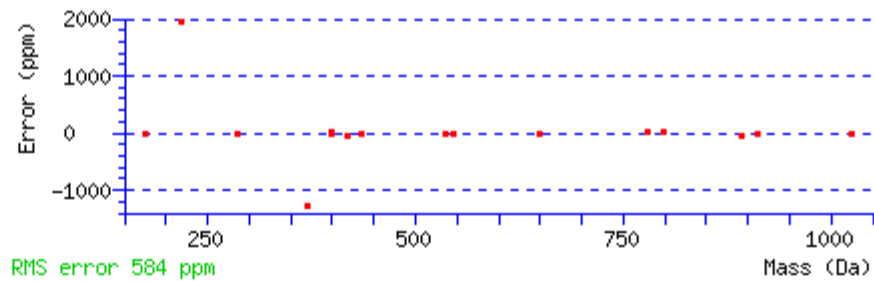

NCBI BLAST search of [GDLLFLTNR](#)

(Parameters: blastp, nr protein database, expect=20000, no filter, PAM30)

Other BLAST [web gateways](#)

All matches to this query

| Score | Mr(calc):   | Delta     | Sequence                     |
|-------|-------------|-----------|------------------------------|
| 43.1  | 1194.639709 | -0.000101 | <a href="#">GDLLFLTNR</a>    |
| 8.2   | 1194.639709 | -0.000101 | <a href="#">DVIAFPKSFR</a>   |
| 4.8   | 1194.635696 | 0.003912  | <a href="#">GDLGLPGQPGLR</a> |
| 4.7   | 1194.646912 | -0.007304 | <a href="#">LSTPGPRPSGAR</a> |
| 3.9   | 1194.635696 | 0.003912  | <a href="#">GDLGLPGQPGLR</a> |

Mascot: <http://www.matrixscience.com/>

# MASCOT Search Results

## Peptide View

MS/MS Fragmentation of **DASIGQACEAQAK**

Found in **SRP54\_HUMAN**, Signal recognition particle 54 kDa protein OS=Homo sapiens GN=SRP54 PE=1 SV=1

Match to Query 693810: 1347.616348 from(674.815450,2+) rtinseconds(1217) index(247897)

Title: Locus:1.1.1.906.31

Data file C:\Program Files (x86)\Matrix Science\Mascot Daemon\mgf3 TFD - Epitel - R2\mascot\_daemon\_merge.mgf

Click mouse within plot area to zoom in by factor of two about that point

Or, Plot from  to  Da

Label all possible matches  Label matches used for scoring

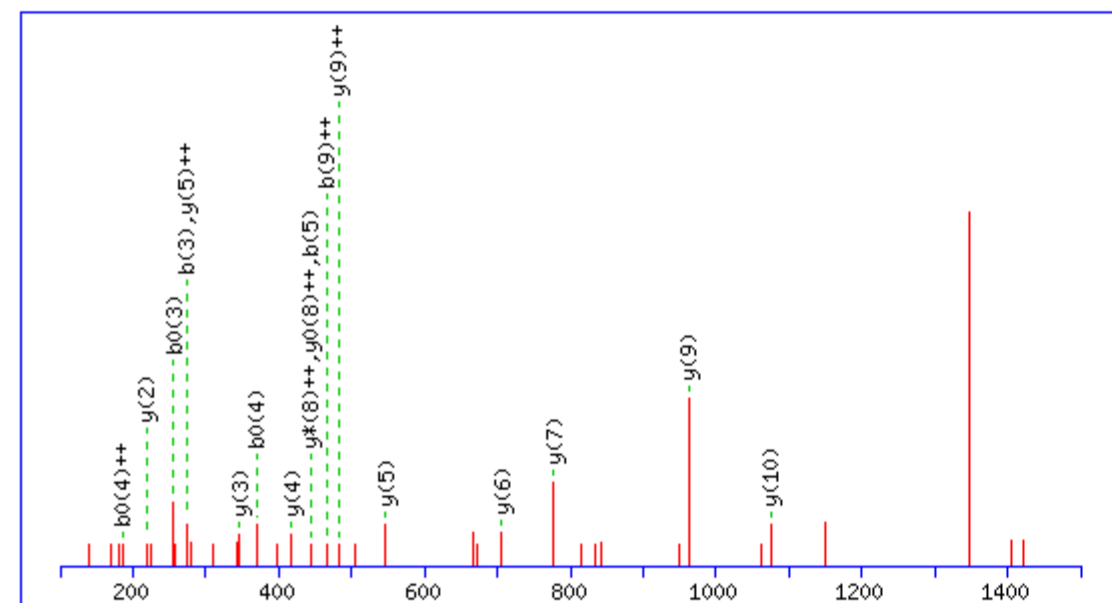

Monoisotopic mass of neutral peptide Mr(calc): 1347.608856

Fixed modifications: Carbamidomethyl (C) (apply to specified residues or termini only)

Ions Score: 46 Expect: 0.00016

Matches : 18/126 fragment ions using 32 most intense peaks [\(help\)](#)

| #  | b                 | b <sup>++</sup>   | b <sup>+</sup> | b <sup>*++</sup> | b <sup>0</sup>    | b <sup>0++</sup>  | Seq. | y                  | y <sup>++</sup>   | y <sup>+</sup> | y <sup>*++</sup>  | y <sup>0</sup> | y <sup>0++</sup>  | #  |
|----|-------------------|-------------------|----------------|------------------|-------------------|-------------------|------|--------------------|-------------------|----------------|-------------------|----------------|-------------------|----|
| 1  | 116.034219        | 58.520748         |                |                  | 98.023654         | 49.515465         | D    |                    |                   |                |                   |                |                   | 13 |
| 2  | 187.071333        | 94.039304         |                |                  | 169.060768        | 85.034022         | A    | 1233.589214        | 617.298245        | 1216.562665    | 608.784971        | 1215.578649    | 608.292963        | 12 |
| 3  | <b>274.103361</b> | 137.555319        |                |                  | <b>256.092796</b> | 128.550036        | S    | 1162.552100        | 581.779688        | 1145.525551    | 573.266414        | 1144.541535    | 572.774406        | 11 |
| 4  | 387.187425        | 194.097351        |                |                  | <b>369.176860</b> | <b>185.092068</b> | I    | <b>1075.520072</b> | 538.263674        | 1058.493523    | 529.750400        | 1057.509507    | 529.258392        | 10 |
| 5  | <b>444.208889</b> | 222.608082        |                |                  | 426.198324        | 213.602800        | G    | <b>962.436008</b>  | <b>481.721642</b> | 945.409459     | 473.208368        | 944.425443     | 472.716360        | 9  |
| 6  | 572.267467        | 286.637372        | 555.240918     | 278.124097       | 554.256902        | 277.632089        | Q    | 905.414544         | 453.210910        | 888.387995     | <b>444.697636</b> | 887.403979     | <b>444.205628</b> | 8  |
| 7  | 643.304581        | 322.155929        | 626.278032     | 313.642654       | 625.294016        | 313.150646        | A    | <b>777.355966</b>  | 389.181621        | 760.329417     | 380.668347        | 759.345401     | 380.176339        | 7  |
| 8  | 803.335230        | 402.171253        | 786.308681     | 393.657979       | 785.324665        | 393.165971        | C    | <b>706.318852</b>  | 353.663064        | 689.292303     | 345.149790        | 688.308287     | 344.657782        | 6  |
| 9  | 932.377823        | <b>466.692550</b> | 915.351274     | 458.179275       | 914.367258        | 457.687267        | E    | <b>546.288203</b>  | <b>273.647740</b> | 529.261654     | 265.134465        | 528.277638     | 264.642457        | 5  |
| 10 | 1003.414937       | 502.211107        | 986.388388     | 493.697832       | 985.404372        | 493.205824        | A    | <b>417.245610</b>  | 209.126443        | 400.219061     | 200.613168        |                |                   | 4  |
| 11 | 1131.473515       | 566.240396        | 1114.446966    | 557.727121       | 1113.462950       | 557.235113        | Q    | <b>346.208496</b>  | 173.607886        | 329.181947     | 165.094611        |                |                   | 3  |
| 12 | 1202.510629       | 601.758953        | 1185.484080    | 593.245678       | 1184.500064       | 592.753670        | A    | <b>218.149918</b>  | 109.578597        | 201.123369     | 101.065322        |                |                   | 2  |
| 13 |                   |                   |                |                  |                   |                   | K    | 147.112804         | 74.060040         | 130.086255     | 65.546765         |                |                   | 1  |

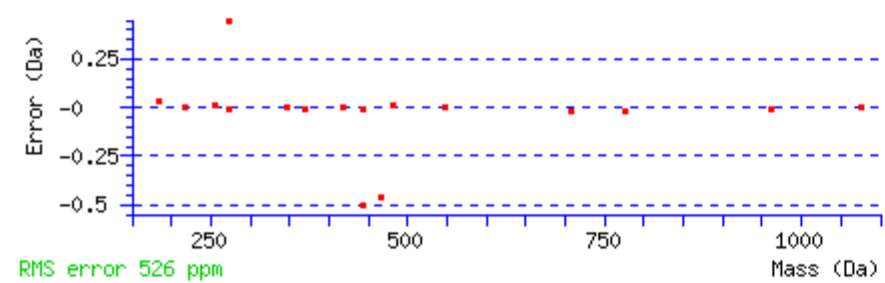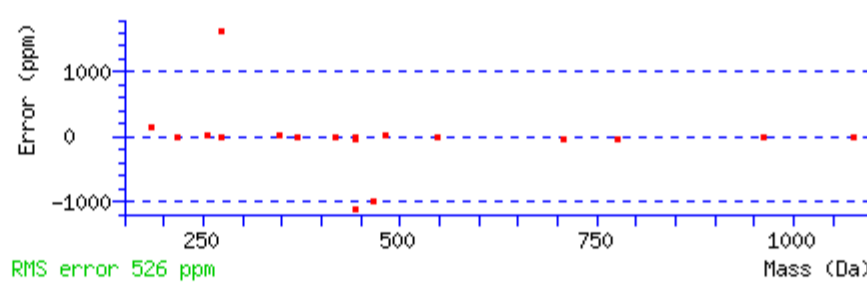

NCBI BLAST search of **DASIGQACEAQAK**

(Parameters: blastp, nr protein database, expect=20000, no filter, PAM30)

Other BLAST [web gateways](#)

## All matches to this query

| Score | Mr(calc):   | Delta     | Sequence                      |
|-------|-------------|-----------|-------------------------------|
| 45.7  | 1347.608856 | 0.007492  | <a href="#">DASIGQACEAQAK</a> |
| 4.8   | 1347.622787 | -0.006439 | <a href="#">EEDATLSSPAVVM</a> |
| 1.0   | 1347.626602 | -0.010254 | <a href="#">QKEGESEDLASR</a>  |
| 0.4   | 1347.627991 | -0.011643 | <a href="#">GTVHSQGEPGHR</a>  |

Mascot: <http://www.matrixscience.com/>

# MASCOT Search Results

## Peptide View

MS/MS Fragmentation of **LEALITQTR**

Found in **SRP68\_HUMAN**, Signal recognition particle 68 kDa protein OS=Homo sapiens GN=SRP68 PE=1 SV=2

Match to Query 320161: 1043.593168 from(522.803860,2+) rtinseconds(1931) index(593514)

Title: Locus:1.1.1.1059.16

Data file C:\Program Files (x86)\Matrix Science\Mascot Daemon\mgf\3 TFD - Epitel - R2\mascot\_daemon\_merge.mgf

Click mouse within plot area to zoom in by factor of two about that point

Or, Plot from  to  Da

Label all possible matches  Label matches used for scoring

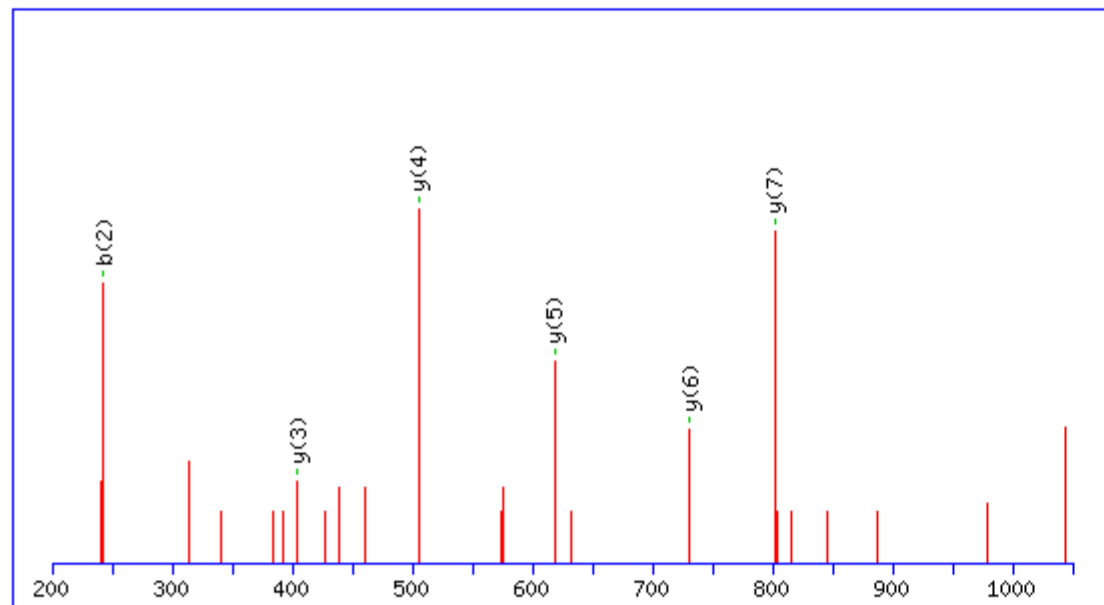

Monoisotopic mass of neutral peptide  $M_r(\text{calc})$ : 1043.597488

Fixed modifications: Carbamidomethyl (C) (apply to specified residues or termini only)

Ions Score: 38 Expect: 0.002

Matches : 6/80 fragment ions using 8 most intense peaks ([help](#))

| # | b                 | b <sup>++</sup> | b <sup>*</sup> | b <sup>*++</sup> | b <sup>0</sup> | b <sup>0++</sup> | Seq. | y                 | y <sup>++</sup> | y <sup>*</sup> | y <sup>*++</sup> | y <sup>0</sup> | y <sup>0++</sup> | # |
|---|-------------------|-----------------|----------------|------------------|----------------|------------------|------|-------------------|-----------------|----------------|------------------|----------------|------------------|---|
| 1 | 114.091340        | 57.549308       |                |                  |                |                  | L    |                   |                 |                |                  |                |                  | 9 |
| 2 | <b>243.133933</b> | 122.070605      |                |                  | 225.123368     | 113.065322       | E    | 931.520723        | 466.264000      | 914.494174     | 457.750725       | 913.510158     | 457.258717       | 8 |
| 3 | 314.171047        | 157.589161      |                |                  | 296.160482     | 148.583879       | A    | <b>802.478130</b> | 401.742703      | 785.451581     | 393.229429       | 784.467565     | 392.737421       | 7 |
| 4 | 427.255111        | 214.131193      |                |                  | 409.244546     | 205.125911       | L    | <b>731.441016</b> | 366.224146      | 714.414467     | 357.710872       | 713.430451     | 357.218864       | 6 |
| 5 | 540.339175        | 270.673226      |                |                  | 522.328610     | 261.667943       | I    | <b>618.356952</b> | 309.682114      | 601.330403     | 301.168840       | 600.346387     | 300.676832       | 5 |
| 6 | 641.386854        | 321.197065      |                |                  | 623.376289     | 312.191783       | T    | <b>505.272888</b> | 253.140082      | 488.246339     | 244.626808       | 487.262323     | 244.134800       | 4 |
| 7 | 769.445432        | 385.226354      | 752.418883     | 376.713080       | 751.434867     | 376.221072       | Q    | <b>404.225209</b> | 202.616243      | 387.198660     | 194.102968       | 386.214644     | 193.610960       | 3 |
| 8 | 870.493111        | 435.750194      | 853.466562     | 427.236919       | 852.482546     | 426.744911       | T    | 276.166631        | 138.586954      | 259.140082     | 130.073679       | 258.156066     | 129.581671       | 2 |
| 9 |                   |                 |                |                  |                |                  | R    | 175.118952        | 88.063114       | 158.092403     | 79.549840        |                |                  | 1 |

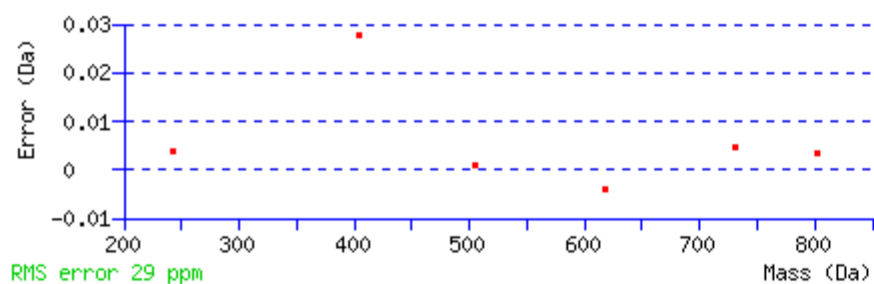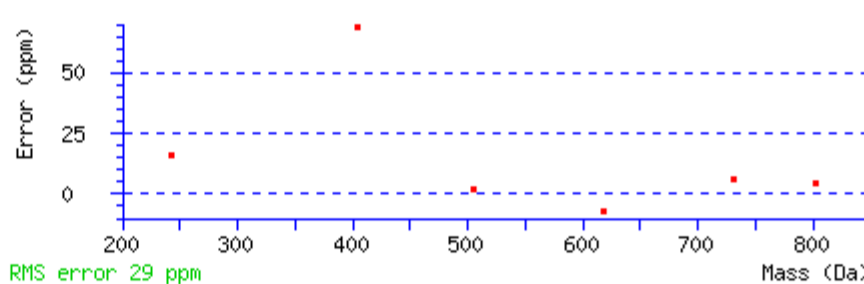

NCBI BLAST search of **LEALITQTR**

(Parameters: blastp, nr protein database, expect=20000, no filter, PAM30)

Other BLAST [web gateways](#)

## All matches to this query

| Score | $M_r(\text{calc})$ | Delta     | Sequence                  |
|-------|--------------------|-----------|---------------------------|
| 37.6  | 1043.597488        | -0.004320 | <a href="#">LEALITQTR</a> |
| 10.6  | 1043.593643        | -0.000475 | <a href="#">ILSPLEIIM</a> |
| 0.9   | 1043.597504        | -0.004336 | <a href="#">ISPLVKDTR</a> |
| 0.1   | 1043.587585        | 0.005583  | <a href="#">NKPAFQAIR</a> |



# MASCOT Search Results

## Peptide View

MS/MS Fragmentation of **AAGFLRSNK**

Found in **SGSM1\_HUMAN**, Small G protein signaling modulator 1 OS=Homo sapiens GN=SGSM1 PE=1 SV=2

Match to Query 12781: 962.530808 from(482.272680,2+) rtinseconds(2388) index(30257)

Title: Locus:1.1.1.2225.18

Data file 2011-11-12 - TFD - EP 6-1.mgf

Click mouse within plot area to zoom in by factor of two about that point

Or, Plot from  to  Da

Label all possible matches  Label matches used for scoring

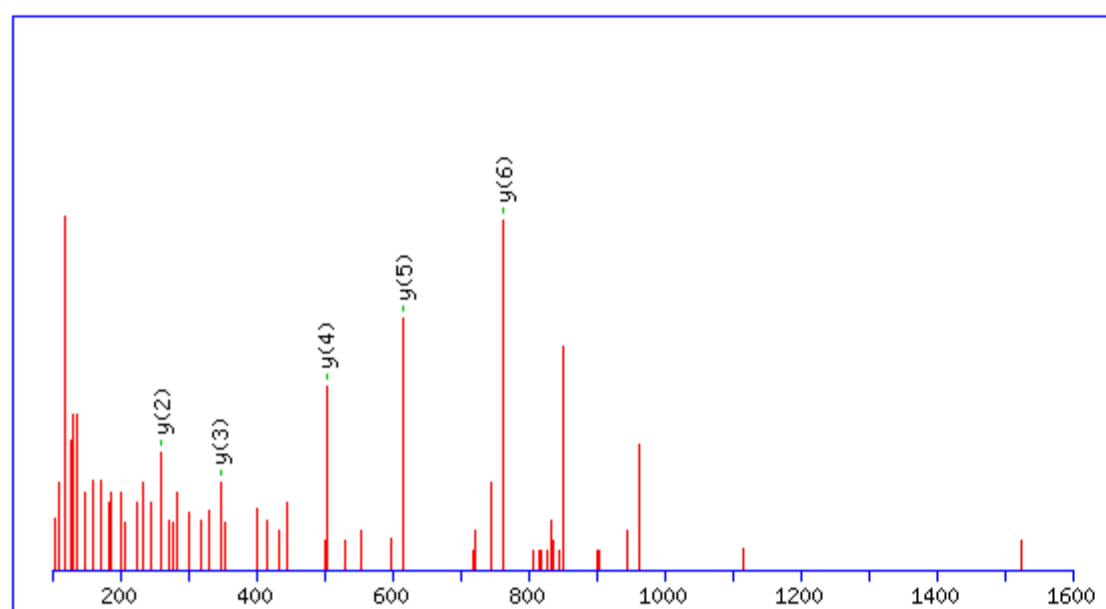

Monoisotopic mass of neutral peptide Mr(calc): 962.529739

Fixed modifications: Propionamide (C) (apply to specified residues or termini only)

Ions Score: 36 Expect: 0.00073

Matches : 5/70 fragment ions using 9 most intense peaks [\(help\)](#)

| # | b          | b <sup>++</sup> | b <sup>*</sup> | b <sup>*++</sup> | b <sup>0</sup> | b <sup>0++</sup> | Seq. | y                 | y <sup>++</sup> | y <sup>*</sup> | y <sup>*++</sup> | y <sup>0</sup> | y <sup>0++</sup> | # |
|---|------------|-----------------|----------------|------------------|----------------|------------------|------|-------------------|-----------------|----------------|------------------|----------------|------------------|---|
| 1 | 72.044390  | 36.525833       |                |                  |                |                  | A    |                   |                 |                |                  |                |                  | 9 |
| 2 | 143.081504 | 72.044390       |                |                  |                |                  | A    | 892.499926        | 446.753601      | 875.473377     | 438.240327       | 874.489361     | 437.748319       | 8 |
| 3 | 200.102968 | 100.555122      |                |                  |                |                  | G    | 821.462812        | 411.235044      | 804.436263     | 402.721769       | 803.452247     | 402.229762       | 7 |
| 4 | 347.171382 | 174.089329      |                |                  |                |                  | F    | <b>764.441348</b> | 382.724312      | 747.414799     | 374.211038       | 746.430783     | 373.719030       | 6 |
| 5 | 460.255446 | 230.631361      |                |                  |                |                  | L    | <b>617.372934</b> | 309.190105      | 600.346385     | 300.676830       | 599.362369     | 300.184823       | 5 |
| 6 | 616.356557 | 308.681917      | 599.330008     | 300.168642       |                |                  | R    | <b>504.288870</b> | 252.648073      | 487.262321     | 244.134798       | 486.278305     | 243.642790       | 4 |
| 7 | 703.388585 | 352.197931      | 686.362036     | 343.684656       | 685.378020     | 343.192648       | S    | <b>348.187759</b> | 174.597517      | 331.161210     | 166.084243       | 330.177194     | 165.592235       | 3 |
| 8 | 817.431512 | 409.219394      | 800.404963     | 400.706120       | 799.420947     | 400.214112       | N    | <b>261.155731</b> | 131.081503      | 244.129182     | 122.568229       |                |                  | 2 |
| 9 |            |                 |                |                  |                |                  | K    | 147.112804        | 74.060040       | 130.086255     | 65.546765        |                |                  | 1 |

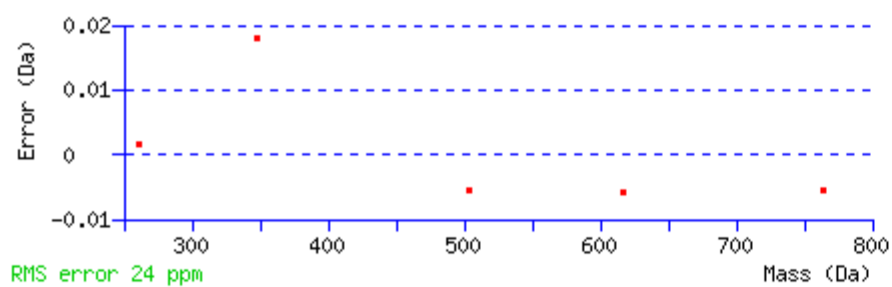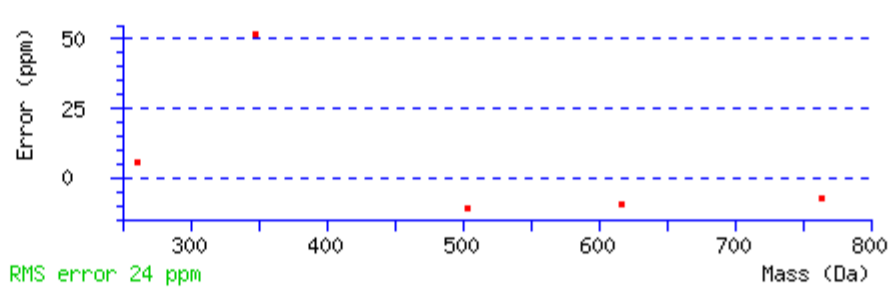

NCBI BLAST search of [AAGFLRSNK](#)

(Parameters: blastp, nr protein database, expect=20000, no filter, PAM30)

Other BLAST [web gateways](#)

All matches to this query

| Score | Mr(calc):  | Delta     | Sequence                   |
|-------|------------|-----------|----------------------------|
| 35.8  | 962.529739 | 0.001069  | <a href="#">AAGFLRSNK</a>  |
| 2.4   | 962.539627 | -0.008819 | <a href="#">LASKSATSAK</a> |

**MATRIX SCIENCE Mascot Search Results**

**Peptide View**

MS/MS Fragmentation of **CNNVLYIR**

Found in **RUXF\_HUMAN**, Small nuclear ribonucleoprotein F OS=Homo sapiens GN=SNRPF PE=1 SV=1

Match to Query 13490: 1064.546448 from(533.280500,2+) rtinseconds(2122) index(10615)

Title: Locus:1.1.1.2324.23

Data file 2011-11-12 - TFD - EP 6-8.mgf

Click mouse within plot area to zoom in by factor of two about that point

Or, Plot from  to  Da

Label all possible matches  Label matches used for scoring

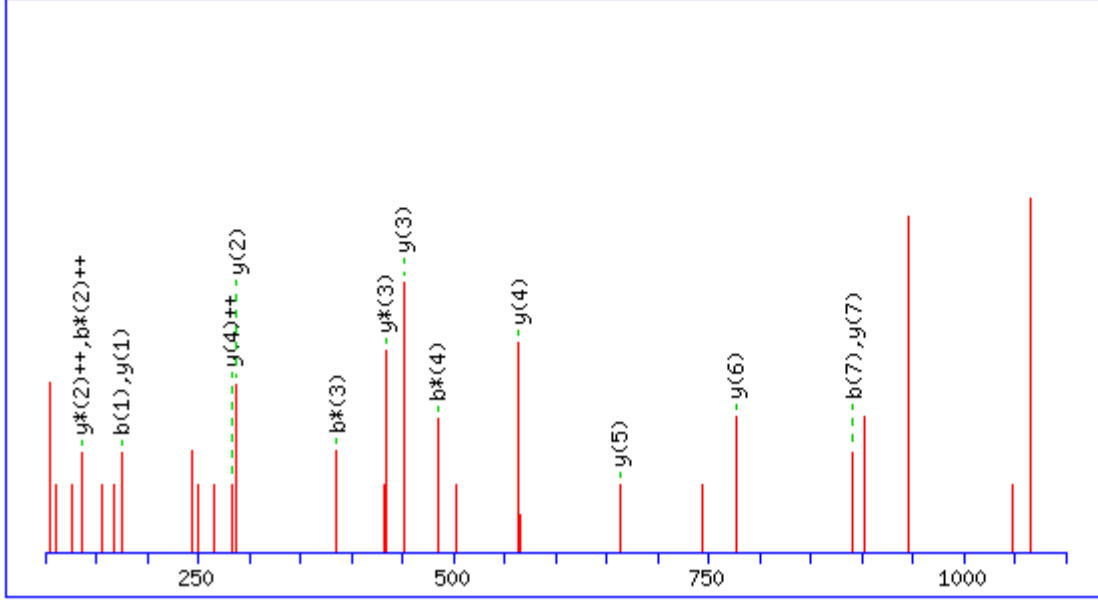

Monoisotopic mass of neutral peptide Mr(calc): 1064.543671

Fixed modifications: Propionamide (C) (apply to specified residues or termini only)

Ions Score: 54 Expect: 4.7e-005

Matches : 15/54 fragment ions using 19 most intense peaks ([help](#))

| # | b                 | b <sup>++</sup> | b <sup>*</sup>    | b <sup>*++</sup>  | Seq.     | y                 | y <sup>++</sup>   | y <sup>*</sup>    | y <sup>*++</sup>  | #        |
|---|-------------------|-----------------|-------------------|-------------------|----------|-------------------|-------------------|-------------------|-------------------|----------|
| 1 | <b>175.053575</b> | 88.030425       |                   |                   | <b>C</b> |                   |                   |                   |                   | <b>8</b> |
| 2 | 289.096502        | 145.051889      | 272.069953        | <b>136.538614</b> | <b>N</b> | <b>891.504677</b> | 446.255977        | 874.478128        | 437.742702        | <b>7</b> |
| 3 | 403.139429        | 202.073353      | <b>386.112880</b> | 193.560078        | <b>N</b> | <b>777.461750</b> | 389.234513        | 760.435201        | 380.721239        | <b>6</b> |
| 4 | 502.207843        | 251.607560      | <b>485.181294</b> | 243.094285        | <b>V</b> | <b>663.418823</b> | 332.213050        | 646.392274        | 323.699775        | <b>5</b> |
| 5 | 615.291907        | 308.149592      | 598.265358        | 299.636317        | <b>L</b> | <b>564.350409</b> | <b>282.678843</b> | 547.323860        | 274.165568        | <b>4</b> |
| 6 | 778.355236        | 389.681256      | 761.328687        | 381.167982        | <b>Y</b> | <b>451.266345</b> | 226.136811        | <b>434.239796</b> | 217.623536        | <b>3</b> |
| 7 | <b>891.439300</b> | 446.223288      | 874.412751        | 437.710014        | <b>I</b> | <b>288.203016</b> | 144.605146        | 271.176467        | <b>136.091872</b> | <b>2</b> |
| 8 |                   |                 |                   |                   | <b>R</b> | <b>175.118952</b> | 88.063114         | 158.092403        | 79.549840         | <b>1</b> |

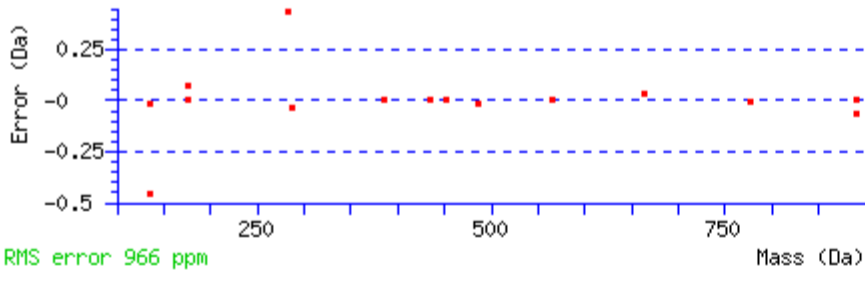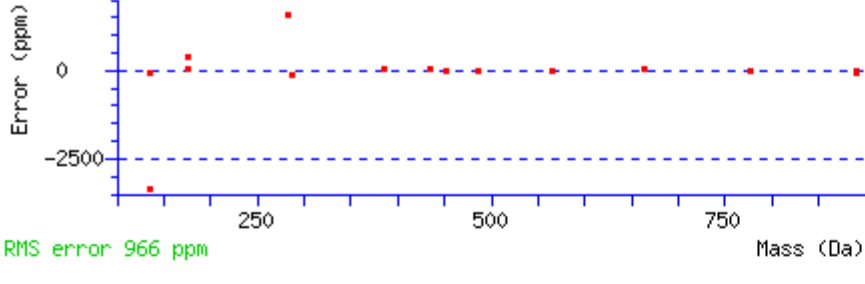

NCBI BLAST search of [CNNVLYIR](#)

(Parameters: blastp, nr protein database, expect=20000, no filter, PAM30)

Other BLAST [web gateways](#)

**All matches to this query**

| Score | Mr(calc):   | Delta     | Sequence                   |
|-------|-------------|-----------|----------------------------|
| 54.1  | 1064.543671 | 0.002777  | <a href="#">CNNVLYIR</a>   |
| 8.6   | 1064.543671 | 0.002777  | <a href="#">YAKALGCPR</a>  |
| 7.3   | 1064.550217 | -0.003769 | <a href="#">SPSEVVYLR</a>  |
| 7.1   | 1064.535797 | 0.010651  | <a href="#">KEMILMER</a>   |
| 5.9   | 1064.536270 | 0.010178  | <a href="#">RYITENNR</a>   |
| 4.6   | 1064.536301 | 0.010147  | <a href="#">SSPHKQPR</a>   |
| 4.6   | 1064.536301 | 0.010147  | <a href="#">SSPHKQPR</a>   |
| 3.8   | 1064.536301 | 0.010147  | <a href="#">SSPHKQPR</a>   |
| 2.7   | 1064.554916 | -0.008468 | <a href="#">CKIQPHPR</a>   |
| 2.0   | 1064.536285 | 0.010163  | <a href="#">AGPGREEPPR</a> |

# MASCOT SCIENCE Mascot Search Results

## Peptide View

MS/MS Fragmentation of **CPEPCPPP**K

Found in **SPR2A\_HUMAN**, Small proline-rich protein 2A OS=Homo sapiens GN=SPRR2A PE=2 SV=1

Match to Query 368560: 1080.475688 from(541.245120,2+) rtinseconds(976) index(243303)

Title: Locus:1.1.1.812.20

Data file C:\Program Files (x86)\Matrix Science\Mascot Daemon\mgf3 TFD - Epitel - R2\mascot\_daemon\_merge.mgf

Click mouse within plot area to zoom in by factor of two about that point

Or, Plot from  to  Da

Label all possible matches  Label matches used for scoring

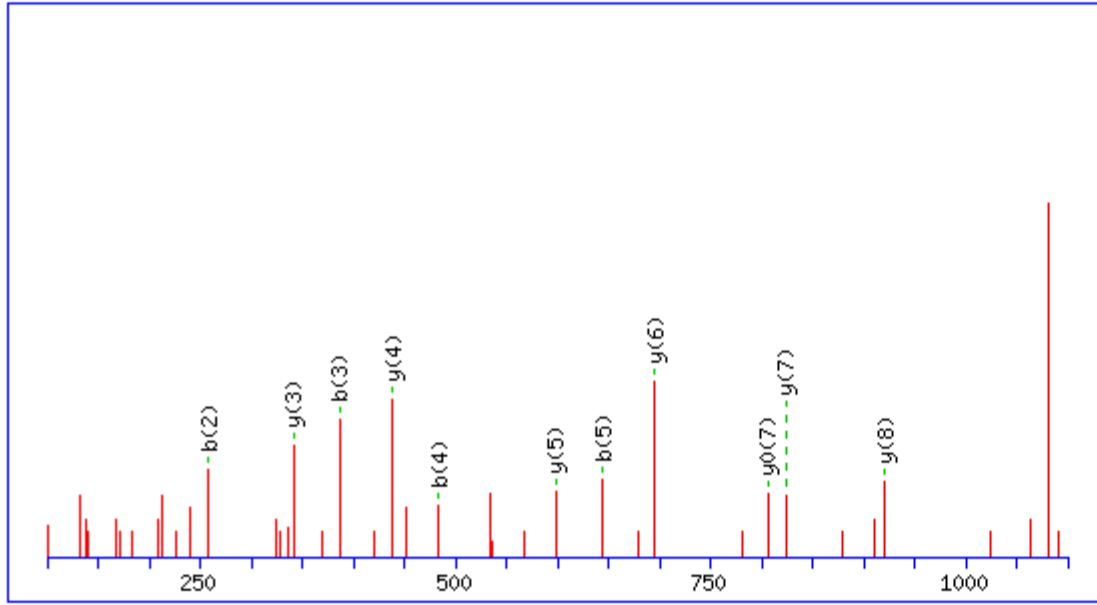

Monoisotopic mass of neutral peptide Mr(calc): 1080.473236

Fixed modifications: Carbamidomethyl (C) (apply to specified residues or termini only)

Ions Score: 43 Expect: 0.00012

Matches : 11/64 fragment ions using 19 most intense peaks [\(help\)](#)

| # | b                 | b <sup>++</sup> | b <sup>0</sup> | b <sup>0++</sup> | Seq. | y                 | y <sup>++</sup> | y <sup>*</sup> | y <sup>*++</sup> | y <sup>0</sup>    | y <sup>0++</sup> | # |
|---|-------------------|-----------------|----------------|------------------|------|-------------------|-----------------|----------------|------------------|-------------------|------------------|---|
| 1 | 161.037925        | 81.022600       |                |                  | C    |                   |                 |                |                  |                   |                  | 9 |
| 2 | <b>258.090689</b> | 129.548982      |                |                  | P    | <b>921.449866</b> | 461.228571      | 904.423317     | 452.715297       | 903.439301        | 452.223289       | 8 |
| 3 | <b>387.133282</b> | 194.070279      | 369.122717     | 185.064997       | E    | <b>824.397102</b> | 412.702189      | 807.370553     | 404.188915       | <b>806.386537</b> | 403.696907       | 7 |
| 4 | <b>484.186046</b> | 242.596661      | 466.175481     | 233.591378       | P    | <b>695.354509</b> | 348.180893      | 678.327960     | 339.667618       |                   |                  | 6 |
| 5 | <b>644.216695</b> | 322.611986      | 626.206130     | 313.606703       | C    | <b>598.301745</b> | 299.654511      | 581.275196     | 291.141236       |                   |                  | 5 |
| 6 | 741.269459        | 371.138368      | 723.258894     | 362.133085       | P    | <b>438.271096</b> | 219.639186      | 421.244547     | 211.125912       |                   |                  | 4 |
| 7 | 838.322223        | 419.664750      | 820.311658     | 410.659467       | P    | <b>341.218332</b> | 171.112804      | 324.191783     | 162.599530       |                   |                  | 3 |
| 8 | 935.374987        | 468.191132      | 917.364422     | 459.185849       | P    | 244.165568        | 122.586422      | 227.139019     | 114.073148       |                   |                  | 2 |
| 9 |                   |                 |                |                  | K    | 147.112804        | 74.060040       | 130.086255     | 65.546765        |                   |                  | 1 |

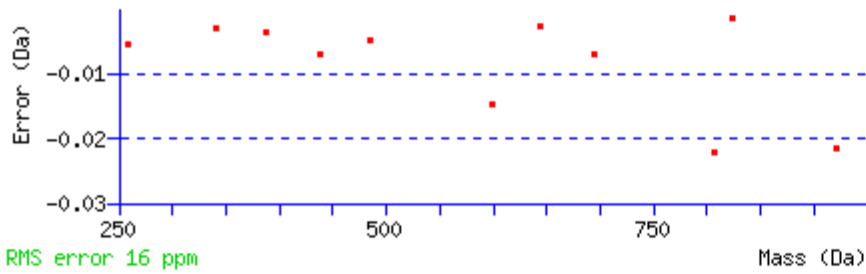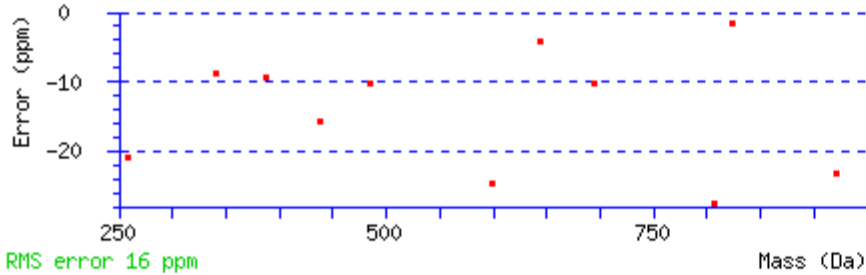

NCBI BLAST search of [CPEPCPPP](#)K

(Parameters: blastp, nr protein database, expect=20000, no filter, PAM30)

Other BLAST [web gateways](#)

## All matches to this query

| Score | Mr(calc):   | Delta     | Sequence                    |
|-------|-------------|-----------|-----------------------------|
| 42.6  | 1080.473236 | 0.002452  | <a href="#">CPEPCPPP</a> K  |
| 0.8   | 1080.483612 | -0.007924 | <a href="#">AEGPPGPPGDR</a> |

# MASCOT Search Results

## Peptide View

MS/MS Fragmentation of **VAGQDGSVVQFK**

Found in **SUMO2\_HUMAN**, Small ubiquitin-related modifier 2 OS=Homo sapiens GN=SUMO2 PE=1 SV=2

Match to Query 35093: 1233.632608 from(617.823580,2+) rtinseconds(1883) index(18836)

Title: Locus:1.1.1.1935.44

Data file 2011-11-12 - TFD - EP 5-6.mgf

Click mouse within plot area to zoom in by factor of two about that point

Or, Plot from  to  Da

Label all possible matches  Label matches used for scoring

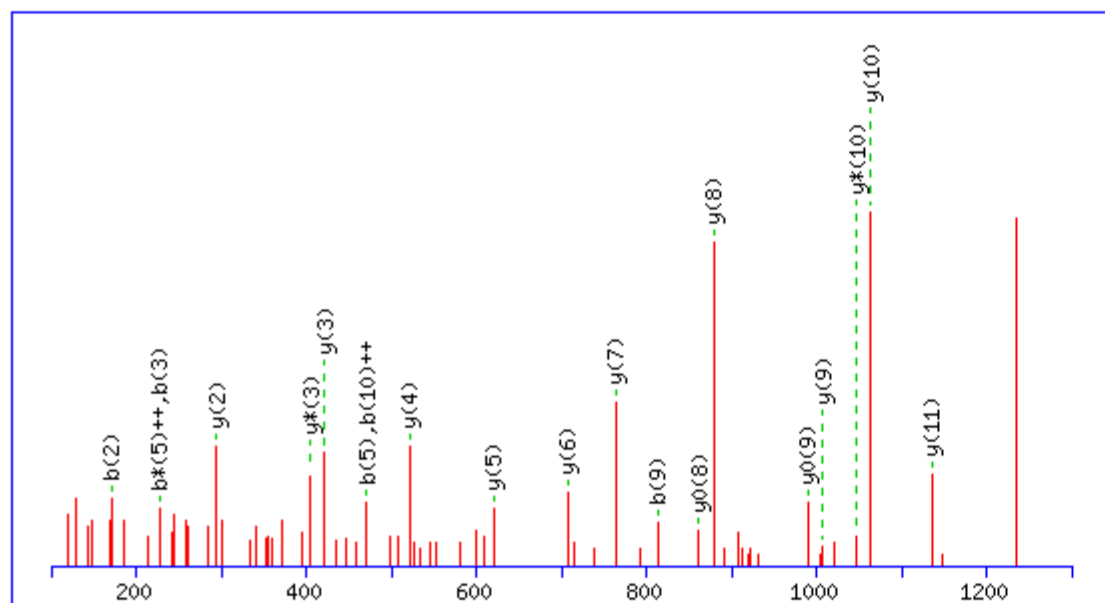

Monoisotopic mass of neutral peptide Mr(calc): 1233.635376

Fixed modifications: Propionamide (C) (apply to specified residues or termini only)

Ions Score: 103 Expect: 7.7e-010

Matches : 20/108 fragment ions using 22 most intense peaks ([help](#))

| #  | b                 | b <sup>++</sup>   | b <sup>+</sup> | b <sup>*++</sup>  | b <sup>0</sup> | b <sup>0++</sup> | Seq. | y                  | y <sup>++</sup> | y <sup>+</sup>     | y <sup>*++</sup> | y <sup>0</sup>    | y <sup>0++</sup> | #  |
|----|-------------------|-------------------|----------------|-------------------|----------------|------------------|------|--------------------|-----------------|--------------------|------------------|-------------------|------------------|----|
| 1  | 100.075690        | 50.541483         |                |                   |                |                  | V    |                    |                 |                    |                  |                   |                  | 12 |
| 2  | <b>171.112804</b> | 86.060040         |                |                   |                |                  | A    | <b>1135.574215</b> | 568.290745      | 1118.547666        | 559.777471       | 1117.563650       | 559.285463       | 11 |
| 3  | <b>228.134268</b> | 114.570772        |                |                   |                |                  | G    | <b>1064.537101</b> | 532.772188      | <b>1047.510552</b> | 524.258914       | 1046.526536       | 523.766906       | 10 |
| 4  | 356.192846        | 178.600061        | 339.166297     | 170.086786        |                |                  | Q    | <b>1007.515637</b> | 504.261457      | 990.489088         | 495.748182       | <b>989.505072</b> | 495.256174       | 9  |
| 5  | <b>471.219789</b> | 236.113532        | 454.193240     | <b>227.600258</b> | 453.209224     | 227.108250       | D    | <b>879.457059</b>  | 440.232168      | 862.430510         | 431.718893       | <b>861.446494</b> | 431.226885       | 8  |
| 6  | 528.241253        | 264.624265        | 511.214704     | 256.110990        | 510.230688     | 255.618982       | G    | <b>764.430116</b>  | 382.718696      | 747.403567         | 374.205422       | 746.419551        | 373.713414       | 7  |
| 7  | 615.273281        | 308.140279        | 598.246732     | 299.627004        | 597.262716     | 299.134996       | S    | <b>707.408652</b>  | 354.207964      | 690.382103         | 345.694689       | 689.398087        | 345.202681       | 6  |
| 8  | 714.341695        | 357.674486        | 697.315146     | 349.161211        | 696.331130     | 348.669203       | V    | <b>620.376624</b>  | 310.691950      | 603.350075         | 302.178676       |                   |                  | 5  |
| 9  | <b>813.410109</b> | 407.208692        | 796.383560     | 398.695418        | 795.399544     | 398.203410       | V    | <b>521.308210</b>  | 261.157743      | 504.281661         | 252.644469       |                   |                  | 4  |
| 10 | 941.468687        | <b>471.237981</b> | 924.442138     | 462.724707        | 923.458122     | 462.232699       | Q    | <b>422.239796</b>  | 211.623536      | <b>405.213247</b>  | 203.110261       |                   |                  | 3  |
| 11 | 1088.537101       | 544.772188        | 1071.510552    | 536.258914        | 1070.526536    | 535.766906       | F    | <b>294.181218</b>  | 147.594247      | 277.154669         | 139.080972       |                   |                  | 2  |
| 12 |                   |                   |                |                   |                |                  | K    | 147.112804         | 74.060040       | 130.086255         | 65.546765        |                   |                  | 1  |

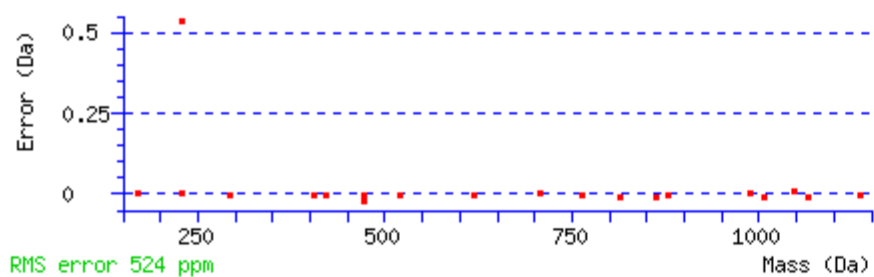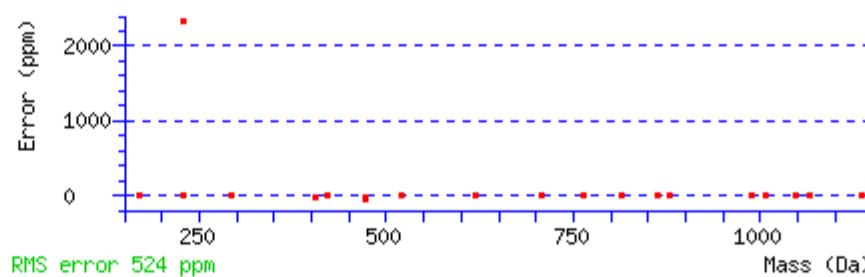

NCBI BLAST search of **VAGQDGSVVQFK**

(Parameters: blastp, nr protein database, expect=20000, no filter, PAM30)

Other BLAST [web gateways](#)

All matches to this query

| Score | Mr(calc):   | Delta     | Sequence                     |
|-------|-------------|-----------|------------------------------|
| 102.6 | 1233.635376 | -0.002768 | <a href="#">VAGQDGSVVQFK</a> |
| 6.8   | 1233.635330 | -0.002722 | <a href="#">NISNTGEKPFK</a>  |
| 4.0   | 1233.627457 | 0.005151  | <a href="#">QLESELQMLK</a>   |
| 1.3   | 1233.621429 | 0.011179  | <a href="#">QVHTSERPHK</a>   |
| 0.8   | 1233.638718 | -0.006110 | <a href="#">QVLDLMTAAR</a>   |

# **MATRIX** SCIENCE Mascot Search Results

## Peptide View

MS/MS Fragmentation of **VALDLDPYVK**

Found in **SNAPN\_HUMAN**, SNARE-associated protein Snapin OS=Homo sapiens GN=SNAPIN PE=1 SV=1

Match to Query 28300: 1131.613088 from(566.813820,2+) rtinseconds(2832) index(36408)

Title: Locus:1.1.1.2298.14

Data file 2011-11-12 - TFD - EP 5-6.mgf

Click mouse within plot area to zoom in by factor of two about that point

Or, Plot from  to  Da

Label all possible matches  Label matches used for scoring

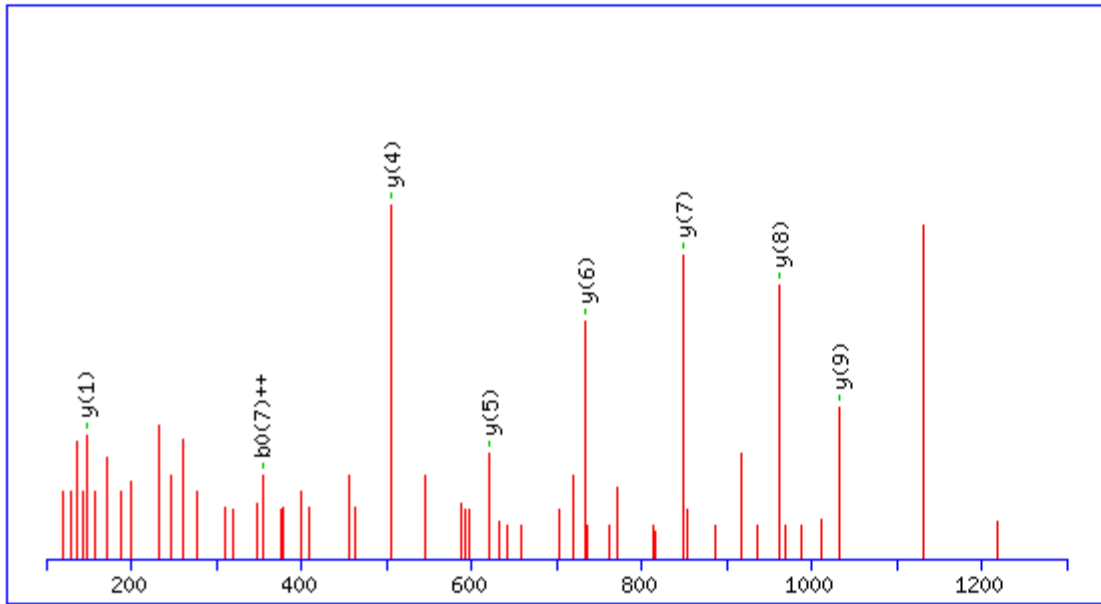

Monoisotopic mass of neutral peptide Mr(calc): 1131.617569

Fixed modifications: Propionamide (C) (apply to specified residues or termini only)

Ions Score: 59 Expect: 4.6e-006

Matches : 8/76 fragment ions using 10 most intense peaks ([help](#))

| #  | b          | b <sup>++</sup> | b <sup>0</sup> | b <sup>0++</sup> | Seq. | y           | y <sup>++</sup> | y <sup>*</sup> | y <sup>*++</sup> | y <sup>0</sup> | y <sup>0++</sup> | #  |
|----|------------|-----------------|----------------|------------------|------|-------------|-----------------|----------------|------------------|----------------|------------------|----|
| 1  | 100.075690 | 50.541483       |                |                  | V    |             |                 |                |                  |                |                  | 10 |
| 2  | 171.112804 | 86.060040       |                |                  | A    | 1033.556439 | 517.281858      | 1016.529890    | 508.768583       | 1015.545874    | 508.276575       | 9  |
| 3  | 284.196868 | 142.602072      |                |                  | L    | 962.519325  | 481.763301      | 945.492776     | 473.250026       | 944.508760     | 472.758018       | 8  |
| 4  | 399.223811 | 200.115544      | 381.213246     | 191.110261       | D    | 849.435261  | 425.221269      | 832.408712     | 416.707994       | 831.424696     | 416.215986       | 7  |
| 5  | 512.307875 | 256.657576      | 494.297310     | 247.652293       | L    | 734.408318  | 367.707797      | 717.381769     | 359.194523       | 716.397753     | 358.702515       | 6  |
| 6  | 627.334818 | 314.171047      | 609.324253     | 305.165765       | D    | 621.324254  | 311.165765      | 604.297705     | 302.652491       | 603.313689     | 302.160483       | 5  |
| 7  | 724.387582 | 362.697429      | 706.377017     | 353.692147       | P    | 506.297311  | 253.652293      | 489.270762     | 245.139019       |                |                  | 4  |
| 8  | 887.450911 | 444.229094      | 869.440346     | 435.223811       | Y    | 409.244547  | 205.125911      | 392.217998     | 196.612637       |                |                  | 3  |
| 9  | 986.519325 | 493.763301      | 968.508760     | 484.758018       | V    | 246.181218  | 123.594247      | 229.154669     | 115.080972       |                |                  | 2  |
| 10 |            |                 |                |                  | K    | 147.112804  | 74.060040       | 130.086255     | 65.546765        |                |                  | 1  |

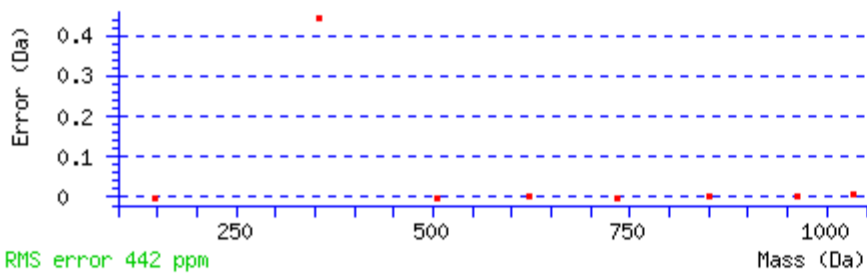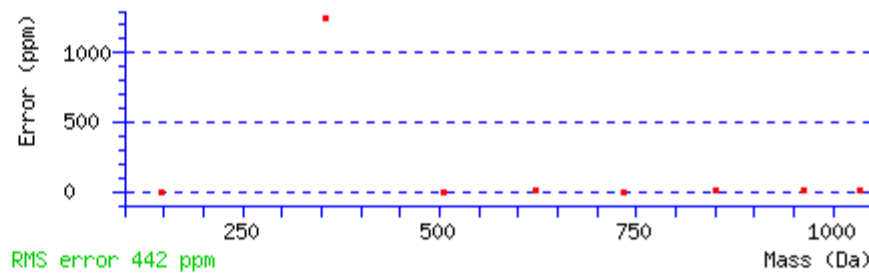

NCBI BLAST search of **VALDLDPYVK**

(Parameters: blastp, nr protein database, expect=20000, no filter, PAM30)

Other BLAST [web gateways](#)

All matches to this query

| Score | Mr(calc):   | Delta     | Sequence                     |
|-------|-------------|-----------|------------------------------|
| 58.7  | 1131.617569 | -0.004481 | <a href="#">VALDLDPYVK</a>   |
| 1.8   | 1131.603668 | 0.009420  | <a href="#">GIPGSHGLPGPK</a> |

Mascot: <http://www.matrixscience.com/>

**Peptide View**

MS/MS Fragmentation of **GTDEVPVPPPVP**  
 Found in **SOS1\_HUMAN**, Son of sevenless homolog 1 OS=Homo sapiens GN=SOS1 PE=1 SV=1

Match to Query 56316: 1707.831012 from(570.284280,3+) rtinseconds(3846) index(57283)  
 Title: Locus:1.1.1.2844.13  
 Data file 2011-11-14 - TFD - EP 8-4.mgf

Click mouse within plot area to zoom in by factor of two about that point  
 Or, Plot from  to  Da   
 Label all possible matches  Label matches used for scoring

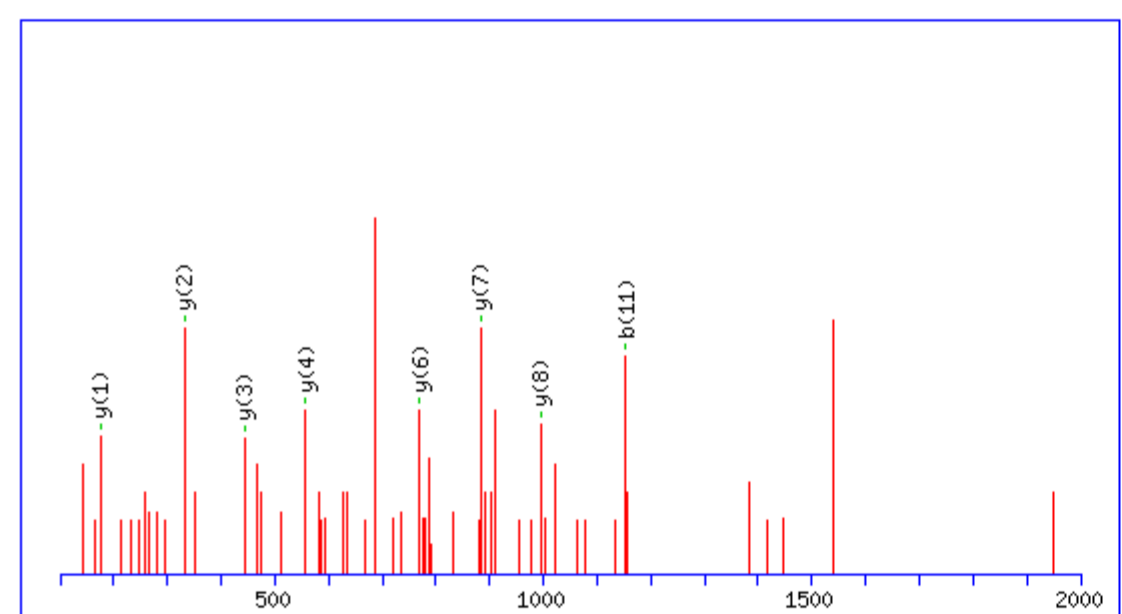

Monoisotopic mass of neutral peptide Mr(calc): 1707.842819  
 Fixed modifications: Propionamide (C) (apply to specified residues or termini only)  
 Variable modifications:  
 P6 : Oxidation (P)  
 P8 : Oxidation (P)  
 P9 : Oxidation (P)  
 P10 : Oxidation (P)  
 P12 : Oxidation (P)  
 P13 : Oxidation (P)  
 Ions Score: 42 Expect: 0.00081  
 Matches : 8/118 fragment ions using 13 most intense peaks ([help](#))

| #  | b                  | b <sup>++</sup> | b <sup>*</sup> | b <sup>***</sup> | b <sup>0</sup> | b <sup>0++</sup> | Seq. | y                 | y <sup>++</sup> | y <sup>*</sup> | y <sup>***</sup> | y <sup>0</sup> | y <sup>0++</sup> | #  |
|----|--------------------|-----------------|----------------|------------------|----------------|------------------|------|-------------------|-----------------|----------------|------------------|----------------|------------------|----|
| 1  | 58.028740          | 29.518008       |                |                  |                |                  | G    |                   |                 |                |                  |                |                  | 15 |
| 2  | 159.076419         | 80.041847       |                |                  | 141.065854     | 71.036565        | T    | 1651.828594       | 826.417935      | 1634.802045    | 817.904661       | 1633.818029    | 817.412653       | 14 |
| 3  | 274.103362         | 137.555319      |                |                  | 256.092797     | 128.550037       | D    | 1550.780915       | 775.894096      | 1533.754366    | 767.380821       | 1532.770350    | 766.888813       | 13 |
| 4  | 403.145955         | 202.076616      |                |                  | 385.135390     | 193.071333       | E    | 1435.753972       | 718.380624      | 1418.727423    | 709.867350       | 1417.743407    | 709.375341       | 12 |
| 5  | 502.214369         | 251.610823      |                |                  | 484.203804     | 242.605540       | V    | 1306.711379       | 653.859328      | 1289.684830    | 645.346053       |                |                  | 11 |
| 6  | 615.262048         | 308.134662      |                |                  | 597.251483     | 299.129380       | P    | 1207.642965       | 604.325121      | 1190.616416    | 595.811846       |                |                  | 10 |
| 7  | 714.330462         | 357.668869      |                |                  | 696.319897     | 348.663587       | V    | 1094.595286       | 547.801281      | 1077.568737    | 539.288007       |                |                  | 9  |
| 8  | 827.378141         | 414.192709      |                |                  | 809.367576     | 405.187426       | P    | <b>995.526872</b> | 498.267074      | 978.500323     | 489.753800       |                |                  | 8  |
| 9  | 940.425820         | 470.716548      |                |                  | 922.415255     | 461.711266       | P    | <b>882.479193</b> | 441.743235      | 865.452644     | 433.229960       |                |                  | 7  |
| 10 | 1053.473499        | 527.240388      |                |                  | 1035.462934    | 518.235105       | P    | <b>769.431514</b> | 385.219395      | 752.404965     | 376.706121       |                |                  | 6  |
| 11 | <b>1152.541913</b> | 576.774595      |                |                  | 1134.531348    | 567.769312       | V    | 656.383835        | 328.695556      | 639.357286     | 320.182281       |                |                  | 5  |
| 12 | 1265.589592        | 633.298434      |                |                  | 1247.579027    | 624.293152       | P    | <b>557.315421</b> | 279.161349      | 540.288872     | 270.648074       |                |                  | 4  |
| 13 | 1378.637271        | 689.822274      |                |                  | 1360.626706    | 680.816991       | P    | <b>444.267742</b> | 222.637509      | 427.241193     | 214.124234       |                |                  | 3  |
| 14 | 1534.738382        | 767.872829      | 1517.711833    | 759.359555       | 1516.727817    | 758.867547       | R    | <b>331.220063</b> | 166.113669      | 314.193514     | 157.600395       |                |                  | 2  |
| 15 |                    |                 |                |                  |                |                  | R    | <b>175.118952</b> | 88.063114       | 158.092403     | 79.549839        |                |                  | 1  |

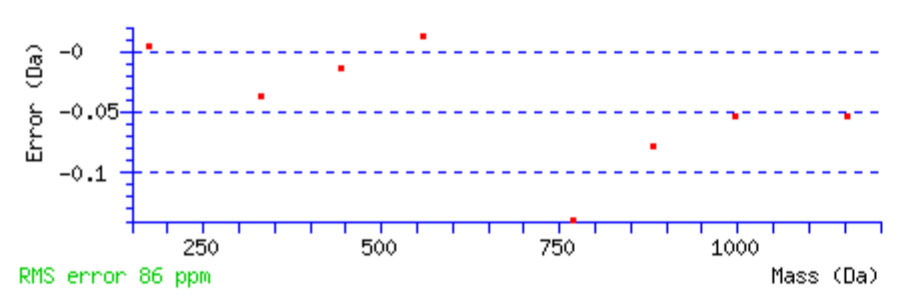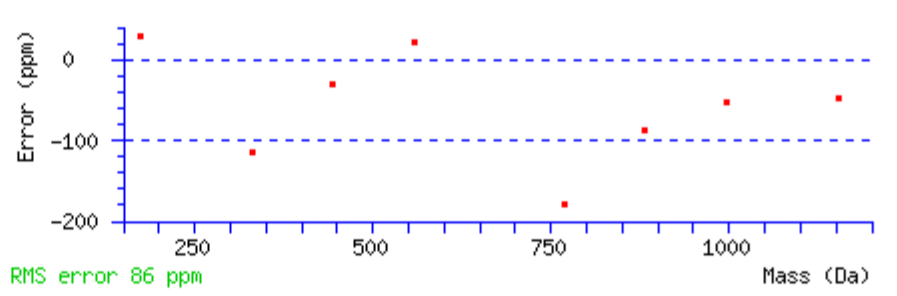

NCBI BLAST search of **GTDEVPVPPPVP**  
 (Parameters: blastp, nr protein database, expect=20000, no filter, PAM30)  
 Other BLAST [web gateways](#)

**All matches to this query**

| Score | Mr(calc):   | Delta     | Sequence                         |
|-------|-------------|-----------|----------------------------------|
| 41.8  | 1707.842819 | -0.011807 | <a href="#">GTDEVPVPPPVP</a>     |
| 18.5  | 1707.831558 | -0.000546 | <a href="#">GPPTSEPPPVPANKPK</a> |
| 10.3  | 1707.831558 | -0.000546 | <a href="#">GPPTSEPPPVPANKPK</a> |
| 8.7   | 1707.831558 | -0.000546 | <a href="#">GPPTSEPPPVPANKPK</a> |
| 6.5   | 1707.824982 | 0.006030  | <a href="#">GNLFSNKDLEELCR</a>   |
| 1.8   | 1707.846802 | -0.015790 | <a href="#">AVSSFPDPALYPLGSR</a> |
| 1.6   | 1707.831558 | -0.000546 | <a href="#">GPPTSEPPPVPANKPK</a> |

# MASCOT SEARCH RESULTS

## Peptide View

MS/MS Fragmentation of **SAALQPEPIK**

Found in **SORL\_HUMAN**, Sortilin-related receptor OS=Homo sapiens GN=SORL1 PE=1 SV=2

Match to Query 376094: 1084.568848 from(543.291700,2+) rtinseconds(2387) index(843584)

Title: Locus:1.1.1.1457.21

Data file C:\Program Files (x86)\Matrix Science\Mascot Daemon\mgf3 TFD - Epitel - R2\mascot\_daemon\_merge.mgf

Click mouse within plot area to zoom in by factor of two about that point

Or, Plot from  to  Da

Label all possible matches  Label matches used for scoring

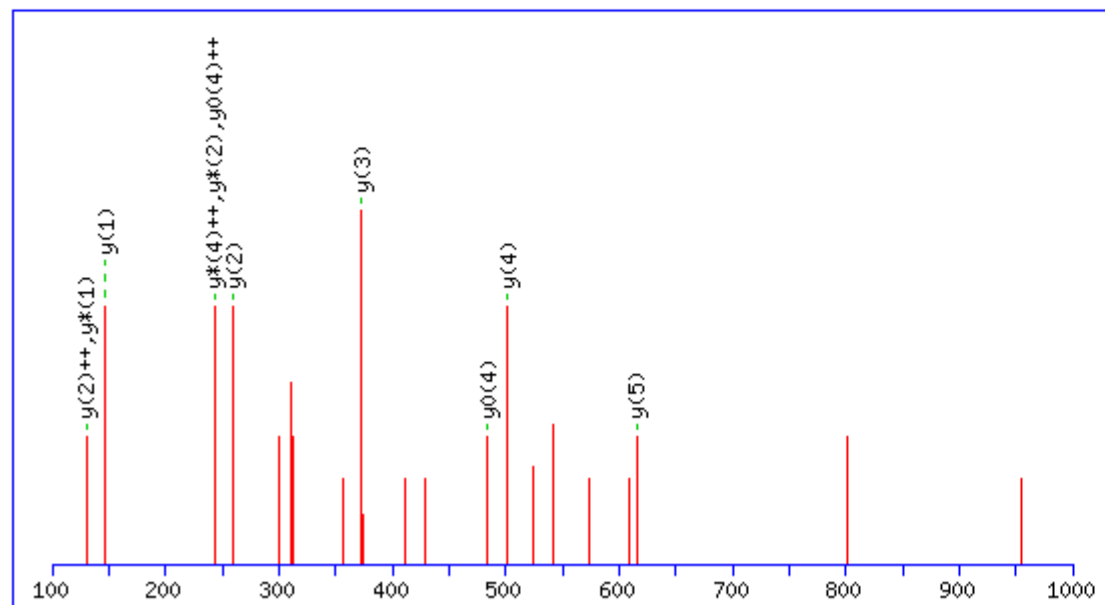

Monoisotopic mass of neutral peptide  $M_r(\text{calc})$ : 1084.576416

Fixed modifications: Carbamidomethyl (C) (apply to specified residues or termini only)

Variable modifications:

P6 : Oxidation (P)

P8 : Oxidation (P)

Ions Score: 36 Expect: 0.0038

Matches : 11/94 fragment ions using 12 most intense peaks [\(help\)](#)

| #  | b          | b <sup>++</sup> | b <sup>*</sup> | b <sup>*++</sup> | b <sup>0</sup> | b <sup>0++</sup> | Seq. | y                 | y <sup>++</sup>   | y <sup>*</sup>    | y <sup>*++</sup>  | y <sup>0</sup>    | y <sup>0++</sup>  | #  |
|----|------------|-----------------|----------------|------------------|----------------|------------------|------|-------------------|-------------------|-------------------|-------------------|-------------------|-------------------|----|
| 1  | 88.039304  | 44.523290       |                |                  | 70.028739      | 35.518008        | S    |                   |                   |                   |                   |                   |                   | 10 |
| 2  | 159.076418 | 80.041847       |                |                  | 141.065853     | 71.036564        | A    | 998.551689        | 499.779483        | 981.525140        | 491.266208        | 980.541124        | 490.774200        | 9  |
| 3  | 230.113532 | 115.560404      |                |                  | 212.102967     | 106.555121       | A    | 927.514575        | 464.260926        | 910.488026        | 455.747651        | 909.504010        | 455.255643        | 8  |
| 4  | 343.197596 | 172.102436      |                |                  | 325.187031     | 163.097153       | L    | 856.477461        | 428.742369        | 839.450912        | 420.229094        | 838.466896        | 419.737086        | 7  |
| 5  | 471.256174 | 236.131725      | 454.229625     | 227.618450       | 453.245609     | 227.126443       | Q    | 743.393397        | 372.200337        | 726.366848        | 363.687062        | 725.382832        | 363.195054        | 6  |
| 6  | 584.303853 | 292.655565      | 567.277304     | 284.142290       | 566.293288     | 283.650282       | P    | <b>615.334819</b> | 308.171048        | 598.308270        | 299.657773        | 597.324254        | 299.165765        | 5  |
| 7  | 713.346446 | 357.176861      | 696.319897     | 348.663587       | 695.335881     | 348.171579       | E    | <b>502.287140</b> | 251.647208        | 485.260591        | <b>243.133934</b> | <b>484.276575</b> | <b>242.641926</b> | 4  |
| 8  | 826.394125 | 413.700701      | 809.367576     | 405.187426       | 808.383560     | 404.695418       | P    | <b>373.244547</b> | 187.125912        | 356.217998        | 178.612637        |                   |                   | 3  |
| 9  | 939.478189 | 470.242733      | 922.451640     | 461.729458       | 921.467624     | 461.237450       | I    | <b>260.196868</b> | <b>130.602072</b> | <b>243.170319</b> | 122.088798        |                   |                   | 2  |
| 10 |            |                 |                |                  |                |                  | K    | <b>147.112804</b> | 74.060040         | <b>130.086255</b> | 65.546766         |                   |                   | 1  |

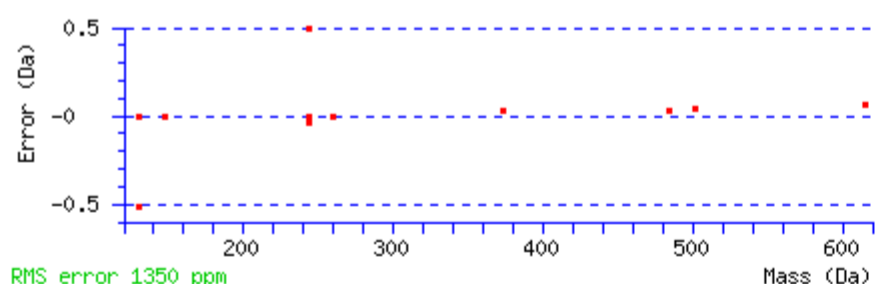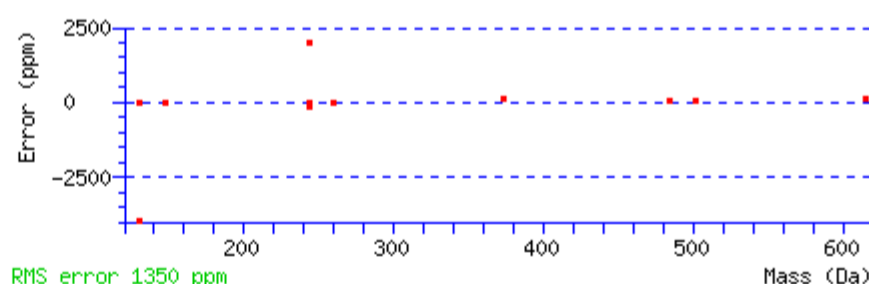

NCBI BLAST search of [SAALQPEPIK](#)

(Parameters: blastp, nr protein database, expect=20000, no filter, PAM30)

Other BLAST [web gateways](#)

### All matches to this query

| Score | $M_r(\text{calc})$ : | Delta     | Sequence                   |
|-------|----------------------|-----------|----------------------------|
| 36.4  | 1084.576416          | -0.007568 | <a href="#">SAALQPEPIK</a> |
| 25.0  | 1084.558670          | 0.010178  | <a href="#">THTMELLPK</a>  |
| 23.7  | 1084.576431          | -0.007583 | <a href="#">GLQEGVELPK</a> |
| 13.4  | 1084.566544          | 0.002304  | <a href="#">FHVQLSNPK</a>  |
| 13.2  | 1084.558685          | 0.010163  | <a href="#">TDIVHMIPK</a>  |
| 12.8  | 1084.576447          | -0.007599 | <a href="#">DPVDGTQLLK</a> |
| 12.5  | 1084.576401          | -0.007553 | <a href="#">APAAEKLEPK</a> |
| 12.5  | 1084.576416          | -0.007568 | <a href="#">VENLQPEIK</a>  |
| 11.6  | 1084.576431          | -0.007583 | <a href="#">EIIDPVLDR</a>  |
| 11.2  | 1084.576431          | -0.007583 | <a href="#">SPPPKSSLPK</a> |

Mascot: <http://www.matrixscience.com/>

# MASCOT Search Results

## Peptide View

MS/MS Fragmentation of **TTLPTFQSPEFSVTR**

Found in **SNX5\_HUMAN**, Sorting nexin-5 OS=Homo sapiens GN=SNX5 PE=1 SV=1

Match to Query 50966: 1709.864248 from(855.939400,2+) rtinseconds(2971) index(41262)

Title: Locus:1.1.1.2619.46

Data file 2011-11-10 - TFD - EP 4-3.mgf

Click mouse within plot area to zoom in by factor of two about that point

Or, Plot from  to  Da

Label all possible matches  Label matches used for scoring

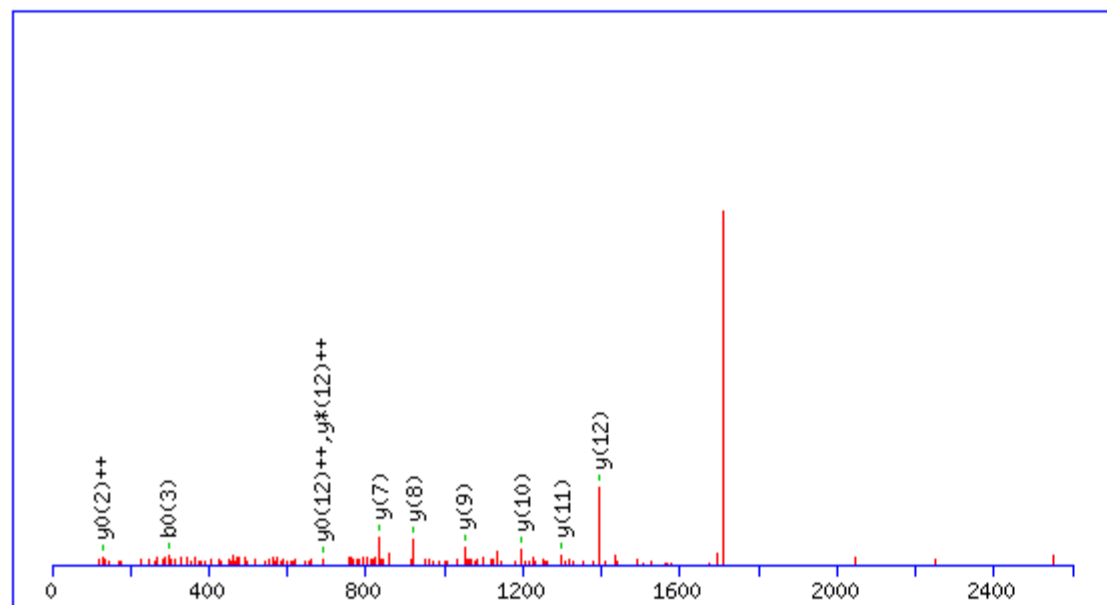

Monoisotopic mass of neutral peptide Mr(calc): 1709.862473

Fixed modifications: Propionamide (C) (apply to specified residues or termini only)

Ions Score: 32 Expect: 0.0021

Matches : 10/154 fragment ions using 16 most intense peaks ([help](#))

| #  | b           | b <sup>++</sup> | b*          | b <sup>*++</sup> | b <sup>0</sup> | b <sup>0++</sup> | Seq. | y           | y <sup>++</sup> | y*          | y <sup>*++</sup> | y <sup>0</sup> | y <sup>0++</sup> | #  |
|----|-------------|-----------------|-------------|------------------|----------------|------------------|------|-------------|-----------------|-------------|------------------|----------------|------------------|----|
| 1  | 102.054955  | 51.531116       |             |                  | 84.044390      | 42.525833        | T    |             |                 |             |                  |                |                  | 15 |
| 2  | 203.102634  | 102.054955      |             |                  | 185.092069     | 93.049672        | T    | 1609.822050 | 805.414663      | 1592.795501 | 796.901389       | 1591.811485    | 796.409381       | 14 |
| 3  | 316.186698  | 158.596987      |             |                  | 298.176133     | 149.591704       | L    | 1508.774371 | 754.890824      | 1491.747822 | 746.377549       | 1490.763806    | 745.885541       | 13 |
| 4  | 413.239462  | 207.123369      |             |                  | 395.228897     | 198.118086       | P    | 1395.690307 | 698.348792      | 1378.663758 | 689.835517       | 1377.679742    | 689.343509       | 12 |
| 5  | 514.287141  | 257.647209      |             |                  | 496.276576     | 248.641926       | T    | 1298.637543 | 649.822410      | 1281.610994 | 641.309135       | 1280.626978    | 640.817127       | 11 |
| 6  | 661.355555  | 331.181416      |             |                  | 643.344990     | 322.176133       | F    | 1197.589864 | 599.298570      | 1180.563315 | 590.785296       | 1179.579299    | 590.293288       | 10 |
| 7  | 789.414133  | 395.210705      | 772.387584  | 386.697430       | 771.403568     | 386.205422       | Q    | 1050.521450 | 525.764363      | 1033.494901 | 517.251089       | 1032.510885    | 516.759081       | 9  |
| 8  | 876.446161  | 438.726719      | 859.419612  | 430.213444       | 858.435596     | 429.721436       | S    | 922.462872  | 461.735074      | 905.436323  | 453.221800       | 904.452307     | 452.729792       | 8  |
| 9  | 973.498925  | 487.253101      | 956.472376  | 478.739826       | 955.488360     | 478.247818       | P    | 835.430844  | 418.219060      | 818.404295  | 409.705786       | 817.420279     | 409.213778       | 7  |
| 10 | 1102.541518 | 551.774397      | 1085.514969 | 543.261123       | 1084.530953    | 542.769115       | E    | 738.378080  | 369.692678      | 721.351531  | 361.179404       | 720.367515     | 360.687396       | 6  |
| 11 | 1249.609932 | 625.308604      | 1232.583383 | 616.795330       | 1231.599367    | 616.303322       | F    | 609.335487  | 305.171382      | 592.308938  | 296.658107       | 591.324922     | 296.166099       | 5  |
| 12 | 1336.641960 | 668.824618      | 1319.615411 | 660.311344       | 1318.631395    | 659.819336       | S    | 462.267073  | 231.637175      | 445.240524  | 223.123900       | 444.256508     | 222.631892       | 4  |
| 13 | 1435.710374 | 718.358825      | 1418.683825 | 709.845551       | 1417.699809    | 709.353543       | V    | 375.235045  | 188.121161      | 358.208496  | 179.607886       | 357.224480     | 179.115878       | 3  |
| 14 | 1536.758053 | 768.882665      | 1519.731504 | 760.369390       | 1518.747488    | 759.877382       | T    | 276.166631  | 138.586953      | 259.140082  | 130.073679       | 258.156066     | 129.581671       | 2  |
| 15 |             |                 |             |                  |                |                  | R    | 175.118952  | 88.063114       | 158.092403  | 79.549839        |                |                  | 1  |

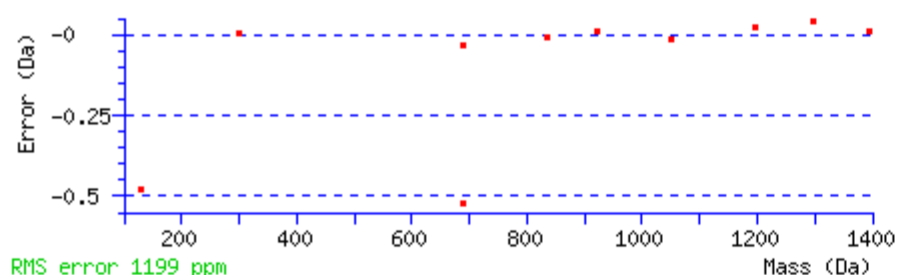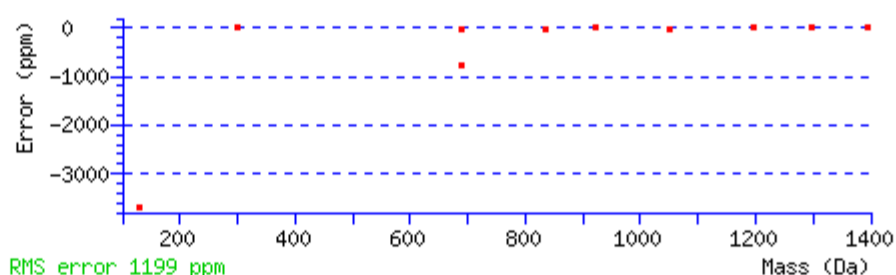

NCBI BLAST search of [TTLPTFQSPEFSVTR](#)

(Parameters: blastp, nr protein database, expect=20000, no filter, PAM30)

Other BLAST [web gateways](#)

All matches to this query

| Score | Mr(calc):   | Delta    | Sequence                        |
|-------|-------------|----------|---------------------------------|
| 31.5  | 1709.862473 | 0.001775 | <a href="#">TTLPTFQSPEFSVTR</a> |

Mascot: <http://www.matrixscience.com/>



# **MASCOT** Mascot Search Results

## Peptide View

MS/MS Fragmentation of **VQLIEDR**

Found in **SPTBI\_HUMAN**, Spectrin beta chain, erythrocyte OS=Homo sapiens GN=SPTB PE=1 SV=5

Match to Query 5947: 871.482568 from(436.748560,2+) rtinseconds(1720) index(11883)

Title: Locus:1.1.1.2061.8

Data file 2011-11-10 - TFD - EP 3-7.mgf

Click mouse within plot area to zoom in by factor of two about that point

Or, Plot from  to  Da

Label all possible matches  Label matches used for scoring

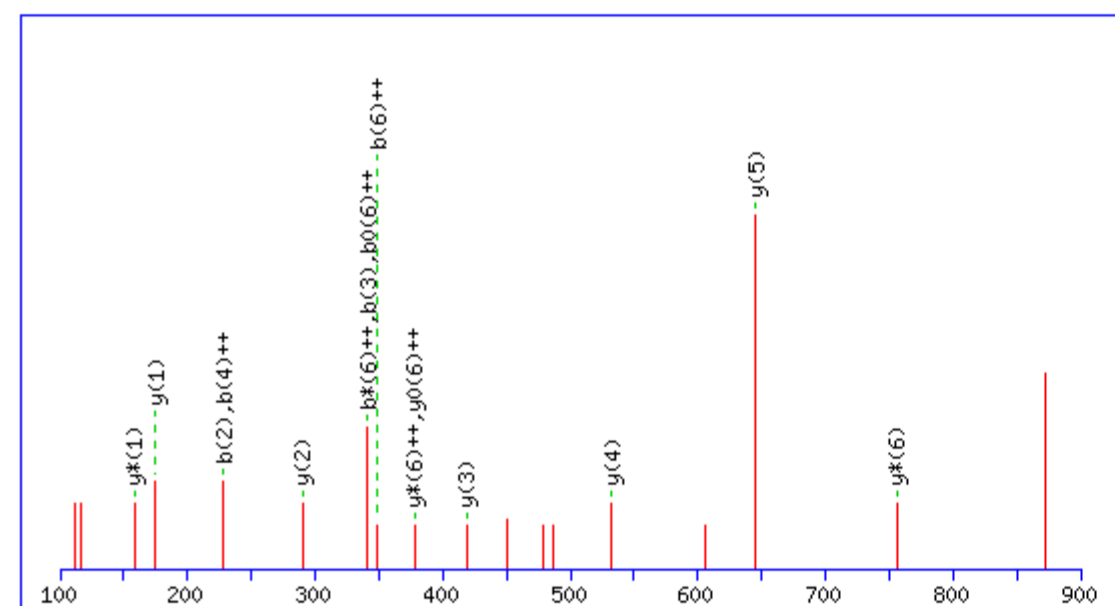

Monoisotopic mass of neutral peptide Mr(calc): 871.476318

Fixed modifications: Propionamide (C) (apply to specified residues or termini only)

Ions Score: 42 Expect: 0.0013

Matches : 15/60 fragment ions using 15 most intense peaks ([help](#))

| # | b                 | b <sup>++</sup>   | b <sup>*</sup> | b <sup>*++</sup>  | b <sup>0</sup> | b <sup>0++</sup>  | Seq. | y                 | y <sup>++</sup> | y <sup>*</sup>    | y <sup>*++</sup>  | y <sup>0</sup> | y <sup>0++</sup>  | # |
|---|-------------------|-------------------|----------------|-------------------|----------------|-------------------|------|-------------------|-----------------|-------------------|-------------------|----------------|-------------------|---|
| 1 | 100.075690        | 50.541483         |                |                   |                |                   | V    |                   |                 |                   |                   |                |                   | 7 |
| 2 | <b>228.134268</b> | 114.570772        | 211.107719     | 106.057498        |                |                   | Q    | 773.415194        | 387.211235      | <b>756.388645</b> | <b>378.697961</b> | 755.404629     | <b>378.205953</b> | 6 |
| 3 | <b>341.218332</b> | 171.112804        | 324.191783     | 162.599530        |                |                   | L    | <b>645.356616</b> | 323.181946      | 628.330067        | 314.668672        | 627.346051     | 314.176664        | 5 |
| 4 | 454.302396        | <b>227.654836</b> | 437.275847     | 219.141562        |                |                   | I    | <b>532.272552</b> | 266.639914      | 515.246003        | 258.126640        | 514.261987     | 257.634632        | 4 |
| 5 | 583.344989        | 292.176133        | 566.318440     | 283.662858        | 565.334424     | 283.170850        | E    | <b>419.188488</b> | 210.097882      | 402.161939        | 201.584608        | 401.177923     | 201.092600        | 3 |
| 6 | 698.371932        | <b>349.689604</b> | 681.345383     | <b>341.176330</b> | 680.361367     | <b>340.684322</b> | D    | <b>290.145895</b> | 145.576585      | 273.119346        | 137.063311        | 272.135330     | 136.571303        | 2 |
| 7 |                   |                   |                |                   |                |                   | R    | <b>175.118952</b> | 88.063114       | <b>158.092403</b> | 79.549840         |                |                   | 1 |

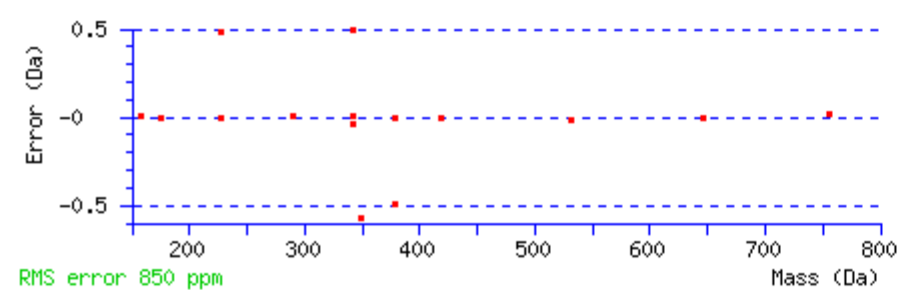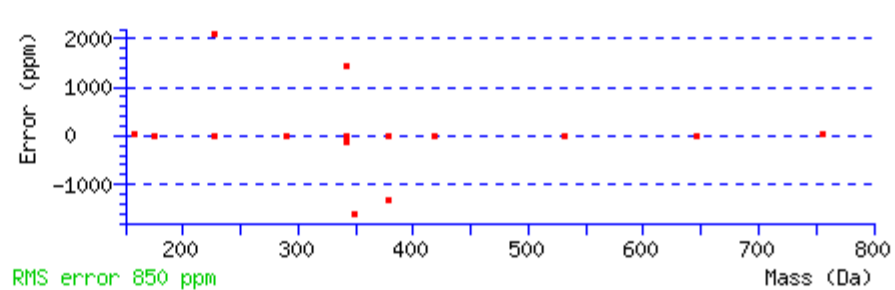

NCBI BLAST search of **VQLIEDR**

(Parameters: blastp, nr protein database, expect=20000, no filter, PAM30)

Other BLAST [web gateways](#)

All matches to this query

| Score | Mr(calc):  | Delta     | Sequence                 |
|-------|------------|-----------|--------------------------|
| 41.8  | 871.476318 | 0.006250  | <a href="#">VQLIEDR</a>  |
| 41.8  | 871.476318 | 0.006250  | <a href="#">VQLLEDR</a>  |
| 26.3  | 871.476318 | 0.006250  | <a href="#">KVPLDER</a>  |
| 20.6  | 871.487534 | -0.004966 | <a href="#">LRALEDR</a>  |
| 12.8  | 871.487564 | -0.004996 | <a href="#">KVQVQDR</a>  |
| 9.4   | 871.487534 | -0.004966 | <a href="#">LNKINDR</a>  |
| 7.5   | 871.487549 | -0.004981 | <a href="#">VKNDQLR</a>  |
| 7.5   | 871.487549 | -0.004981 | <a href="#">VQKSSAPR</a> |
| 7.5   | 871.487534 | -0.004966 | <a href="#">ALRELEDR</a> |
| 5.8   | 871.487534 | -0.004966 | <a href="#">LRADLER</a>  |

# **MASCOT** Mascot Search Results

## Peptide View

### MS/MS Fragmentation of **LADSLIGK**

Found in **SPIN4\_HUMAN**, Spindlin-4 OS=Homo sapiens GN=SPIN4 PE=2 SV=1

Match to Query 1199: 815.477648 from(408.746100,2+) rtinseconds(1885) index(19811)

Title: Locus:1.1.1.2148.2

Data file 2011-11-10 - TFD - EP 3-1.mgf

Click mouse within plot area to zoom in by factor of two about that point

Or, Plot from  to  Da

Label all possible matches  Label matches used for scoring

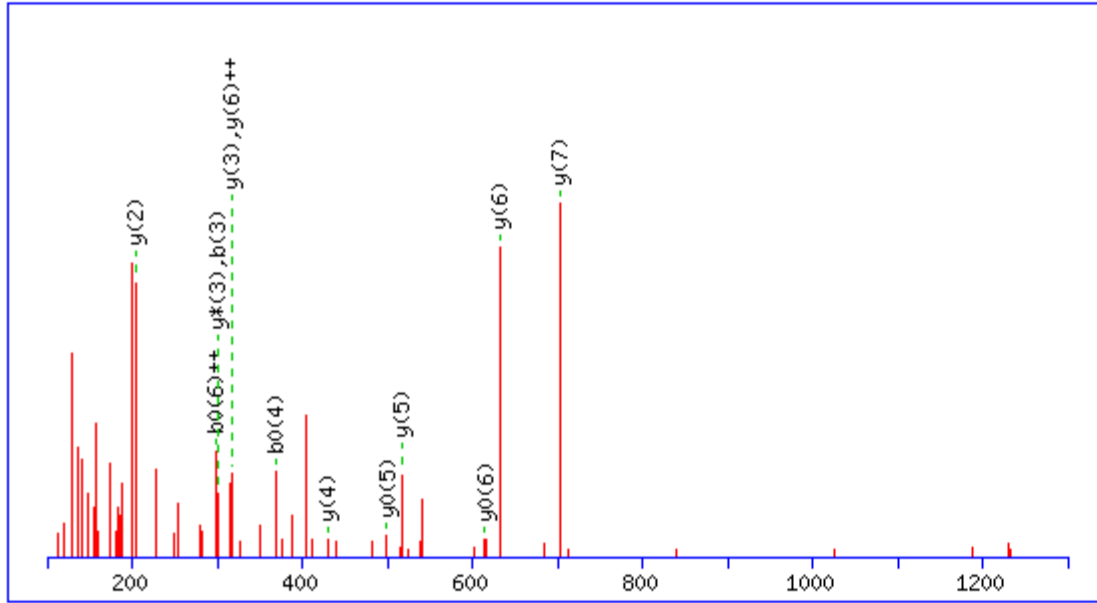

Monoisotopic mass of neutral peptide Mr(calc): 815.475250

Fixed modifications: Propionamide (C) (apply to specified residues or termini only)

Ions Score: 39 Expect: 0.0012

Matches : 13/58 fragment ions using 19 most intense peaks [\(help\)](#)

| # | b          | b <sup>++</sup> | b <sup>0</sup> | b <sup>0++</sup> | Seq. | y          | y <sup>++</sup> | y <sup>*</sup> | y <sup>*++</sup> | y <sup>0</sup> | y <sup>0++</sup> | # |
|---|------------|-----------------|----------------|------------------|------|------------|-----------------|----------------|------------------|----------------|------------------|---|
| 1 | 114.091340 | 57.549308       |                |                  | L    |            |                 |                |                  |                |                  | 8 |
| 2 | 185.128454 | 93.067865       |                |                  | A    | 703.398481 | 352.202879      | 686.371932     | 343.689604       | 685.387916     | 343.197596       | 7 |
| 3 | 300.155397 | 150.581336      | 282.144832     | 141.576054       | D    | 632.361367 | 316.684322      | 615.334818     | 308.171047       | 614.350802     | 307.679039       | 6 |
| 4 | 387.187425 | 194.097351      | 369.176860     | 185.092068       | S    | 517.334424 | 259.170850      | 500.307875     | 250.657576       | 499.323859     | 250.165568       | 5 |
| 5 | 500.271489 | 250.639383      | 482.260924     | 241.634100       | L    | 430.302396 | 215.654836      | 413.275847     | 207.141562       |                |                  | 4 |
| 6 | 613.355553 | 307.181415      | 595.344988     | 298.176132       | I    | 317.218332 | 159.112804      | 300.191783     | 150.599530       |                |                  | 3 |
| 7 | 670.377017 | 335.692147      | 652.366452     | 326.686864       | G    | 204.134268 | 102.570772      | 187.107719     | 94.057498        |                |                  | 2 |
| 8 |            |                 |                |                  | K    | 147.112804 | 74.060040       | 130.086255     | 65.546765        |                |                  | 1 |

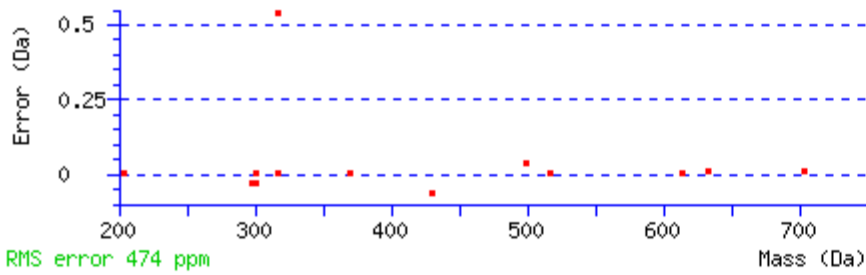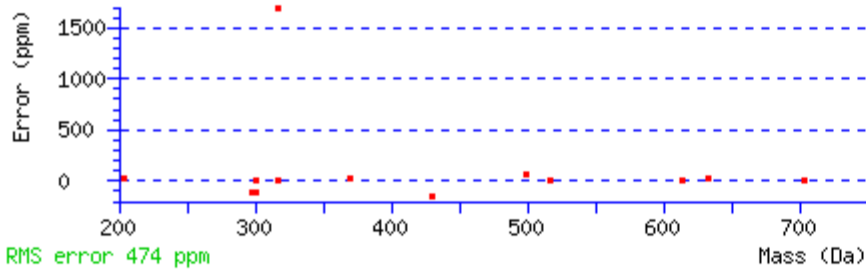

### NCBI BLAST search of **LADSLIGK**

(Parameters: blastp, nr protein database, expect=20000, no filter, PAM30)

Other BLAST [web gateways](#)

### All matches to this query

| Score | Mr(calc):  | Delta    | Sequence                 |
|-------|------------|----------|--------------------------|
| 38.9  | 815.475250 | 0.002398 | <a href="#">LADSLIGK</a> |
| 38.7  | 815.475250 | 0.002398 | <a href="#">LADISLGK</a> |
| 12.5  | 815.475266 | 0.002382 | <a href="#">EGIVTGTK</a> |
| 6.6   | 815.475266 | 0.002382 | <a href="#">EAVTVAVK</a> |
| 5.9   | 815.475235 | 0.002413 | <a href="#">LKEEIGK</a>  |
| 5.9   | 815.475235 | 0.002413 | <a href="#">LKEELGK</a>  |
| 5.0   | 815.475235 | 0.002413 | <a href="#">IEEKLK</a>   |

# MASCOT Search Results

## Peptide View

MS/MS Fragmentation of **SITNTTVCTK**

Found in **SF01\_HUMAN**, Splicing factor 1 OS=Homo sapiens GN=SF1 PE=1 SV=4

Match to Query 423843: 1123.551188 from(562.782870,2+) rtinseconds(1140) index(246387)

Title: Locus:1.1.1.876.21

Data file C:\Program Files (x86)\Matrix Science\Mascot Daemon\mgf\3 TFD - Epitel - R2\mascot\_daemon\_merge.mgf

Click mouse within plot area to zoom in by factor of two about that point

Or, Plot from  to  Da

Label all possible matches  Label matches used for scoring

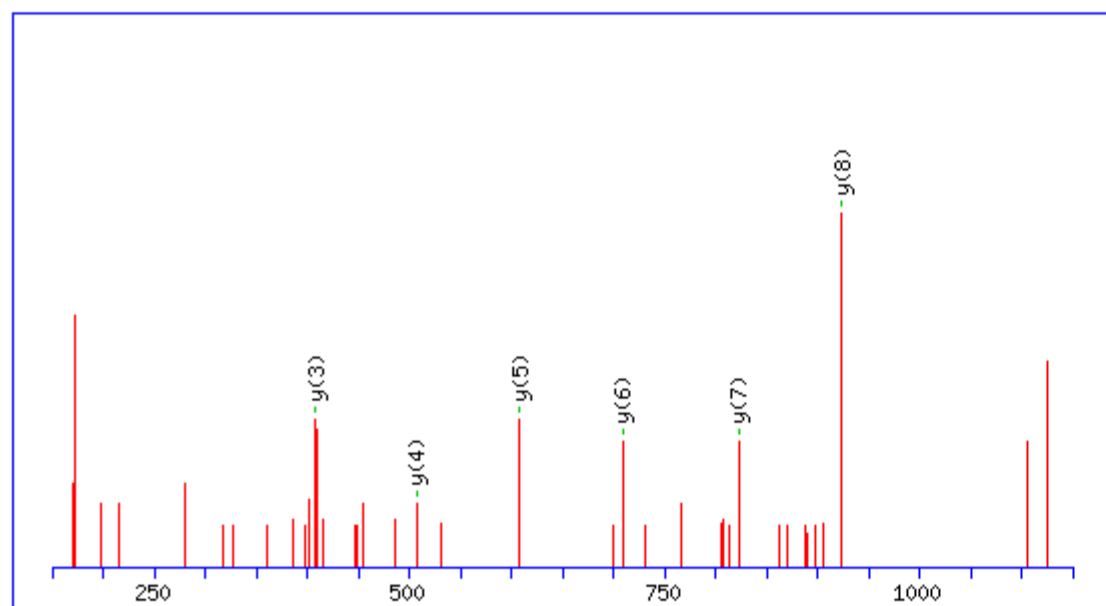

Monoisotopic mass of neutral peptide Mr(calc): 1123.554337

Fixed modifications: Carbamidomethyl (C) (apply to specified residues or termini only)

Ions Score: 50 Expect: 2.2e-005

Matches : 6/100 fragment ions using 9 most intense peaks [\(help\)](#)

| #  | b          | b <sup>++</sup> | b <sup>*</sup> | b <sup>+++</sup> | b <sup>0</sup> | b <sup>0++</sup> | Seq. | y                 | y <sup>++</sup> | y <sup>*</sup> | y <sup>+++</sup> | y <sup>0</sup> | y <sup>0++</sup> | #  |
|----|------------|-----------------|----------------|------------------|----------------|------------------|------|-------------------|-----------------|----------------|------------------|----------------|------------------|----|
| 1  | 88.039304  | 44.523290       |                |                  | 70.028739      | 35.518008        | S    |                   |                 |                |                  |                |                  | 10 |
| 2  | 201.123368 | 101.065322      |                |                  | 183.112803     | 92.060039        | I    | 1037.529574       | 519.268425      | 1020.503025    | 510.755151       | 1019.519009    | 510.263143       | 9  |
| 3  | 302.171047 | 151.589161      |                |                  | 284.160482     | 142.583879       | T    | <b>924.445510</b> | 462.726393      | 907.418961     | 454.213119       | 906.434945     | 453.721111       | 8  |
| 4  | 416.213974 | 208.610625      | 399.187425     | 200.097351       | 398.203409     | 199.605343       | N    | <b>823.397831</b> | 412.202554      | 806.371282     | 403.689279       | 805.387266     | 403.197271       | 7  |
| 5  | 517.261653 | 259.134465      | 500.235104     | 250.621190       | 499.251088     | 250.129182       | T    | <b>709.354904</b> | 355.181090      | 692.328355     | 346.667816       | 691.344339     | 346.175808       | 6  |
| 6  | 618.309332 | 309.658304      | 601.282783     | 301.145030       | 600.298767     | 300.653022       | T    | <b>608.307225</b> | 304.657251      | 591.280676     | 296.143976       | 590.296660     | 295.651968       | 5  |
| 7  | 717.377746 | 359.192511      | 700.351197     | 350.679237       | 699.367181     | 350.187229       | V    | <b>507.259546</b> | 254.133411      | 490.232997     | 245.620136       | 489.248981     | 245.128128       | 4  |
| 8  | 877.408395 | 439.207836      | 860.381846     | 430.694561       | 859.397830     | 430.202553       | C    | <b>408.191132</b> | 204.599204      | 391.164583     | 196.085929       | 390.180567     | 195.593921       | 3  |
| 9  | 978.456074 | 489.731675      | 961.429525     | 481.218401       | 960.445509     | 480.726393       | T    | 248.160483        | 124.583879      | 231.133934     | 116.070605       | 230.149918     | 115.578597       | 2  |
| 10 |            |                 |                |                  |                |                  | K    | 147.112804        | 74.060040       | 130.086255     | 65.546765        |                |                  | 1  |

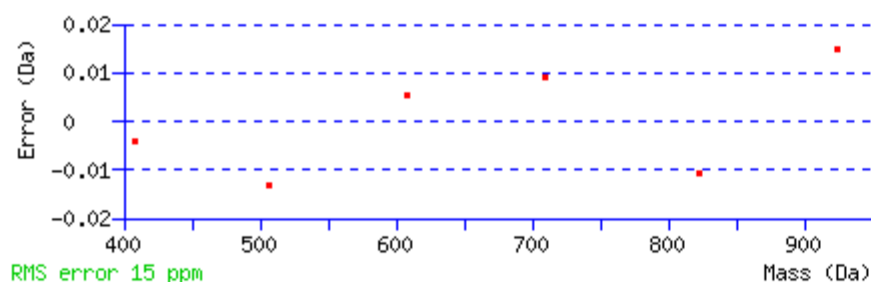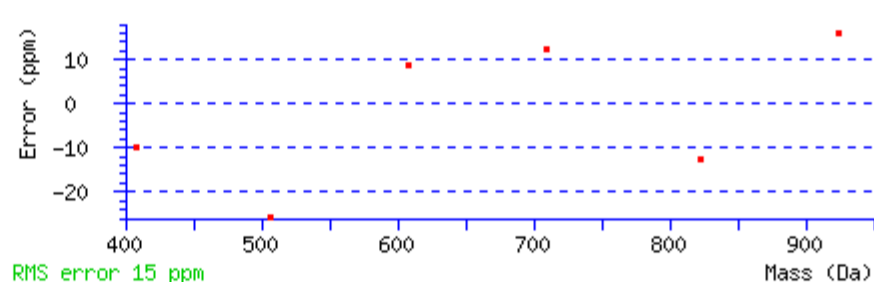

NCBI BLAST search of [SITNTTVCTK](#)

(Parameters: blastp, nr protein database, expect=20000, no filter, PAM30)

Other BLAST [web gateways](#)

All matches to this query

| Score | Mr(calc):   | Delta     | Sequence                    |
|-------|-------------|-----------|-----------------------------|
| 50.3  | 1123.554337 | -0.003149 | <a href="#">SITNTTVCTK</a>  |
| 0.6   | 1123.546951 | 0.004237  | <a href="#">TVTTSQTSQSR</a> |

Mascot: <http://www.matrixscience.com/>

# MASCOT SCIENCE Mascot Search Results

## Peptide View

MS/MS Fragmentation of **SLESLDTSLFAK**

Found in **SF3A3\_HUMAN**, Splicing factor 3A subunit 3 OS=Homo sapiens GN=SF3A3 PE=1 SV=1

Match to Query 33099: 1309.676228 from(655.845390,2+) rtinseconds(3088) index(43560)

Title: Locus:1.1.1.2724.28

Data file 2011-11-13 - TFD - EP 7-3.mgf

Click mouse within plot area to zoom in by factor of two about that point

Or, Plot from  to  Da

Label all possible matches  Label matches used for scoring

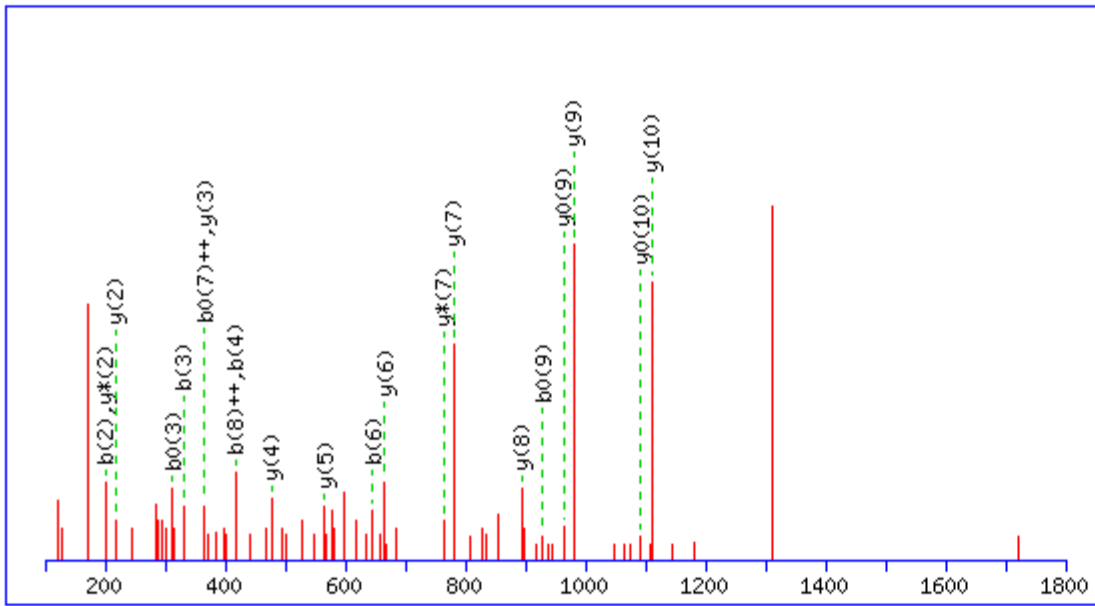

Monoisotopic mass of neutral peptide Mr(calc): 1309.676529

Fixed modifications: Propionamide (C) (apply to specified residues or termini only)

Ions Score: 52 Expect: 8.2e-005

Matches : 21/102 fragment ions using 41 most intense peaks [\(help\)](#)

| #  | b                 | b <sup>++</sup>   | b <sup>0</sup>    | b <sup>0++</sup>  | Seq. | y                  | y <sup>++</sup> | y <sup>*</sup>    | y <sup>*++</sup> | y <sup>0</sup>     | y <sup>0++</sup> | #  |
|----|-------------------|-------------------|-------------------|-------------------|------|--------------------|-----------------|-------------------|------------------|--------------------|------------------|----|
| 1  | 88.039304         | 44.523290         | 70.028739         | 35.518008         | S    |                    |                 |                   |                  |                    |                  | 12 |
| 2  | <b>201.123368</b> | 101.065322        | 183.112803        | 92.060039         | L    | 1223.651795        | 612.329536      | 1206.625246       | 603.816261       | 1205.641230        | 603.324253       | 11 |
| 3  | <b>330.165961</b> | 165.586618        | <b>312.155396</b> | 156.581336        | E    | <b>1110.567731</b> | 555.787504      | 1093.541182       | 547.274229       | <b>1092.557166</b> | 546.782221       | 10 |
| 4  | <b>417.197989</b> | 209.102632        | 399.187424        | 200.097350        | S    | <b>981.525138</b>  | 491.266207      | 964.498589        | 482.752933       | <b>963.514573</b>  | 482.260925       | 9  |
| 5  | 530.282053        | 265.644665        | 512.271488        | 256.639382        | L    | <b>894.493110</b>  | 447.750193      | 877.466561        | 439.236919       | 876.482545         | 438.744911       | 8  |
| 6  | <b>645.308996</b> | 323.158136        | 627.298431        | 314.152853        | D    | <b>781.409046</b>  | 391.208161      | <b>764.382497</b> | 382.694887       | 763.398481         | 382.202879       | 7  |
| 7  | 746.356675        | 373.681976        | 728.346110        | <b>364.676693</b> | T    | <b>666.382103</b>  | 333.694690      | 649.355554        | 325.181415       | 648.371538         | 324.689407       | 6  |
| 8  | 833.388703        | <b>417.197990</b> | 815.378138        | 408.192707        | S    | <b>565.334424</b>  | 283.170850      | 548.307875        | 274.657576       | 547.323859         | 274.165568       | 5  |
| 9  | 946.472767        | 473.740022        | <b>928.462202</b> | 464.734739        | L    | <b>478.302396</b>  | 239.654836      | 461.275847        | 231.141562       |                    |                  | 4  |
| 10 | 1093.541181       | 547.274229        | 1075.530616       | 538.268946        | F    | <b>365.218332</b>  | 183.112804      | 348.191783        | 174.599530       |                    |                  | 3  |
| 11 | 1164.578295       | 582.792786        | 1146.567730       | 573.787503        | A    | <b>218.149918</b>  | 109.578597      | <b>201.123369</b> | 101.065322       |                    |                  | 2  |
| 12 |                   |                   |                   |                   | K    | 147.112804         | 74.060040       | 130.086255        | 65.546765        |                    |                  | 1  |

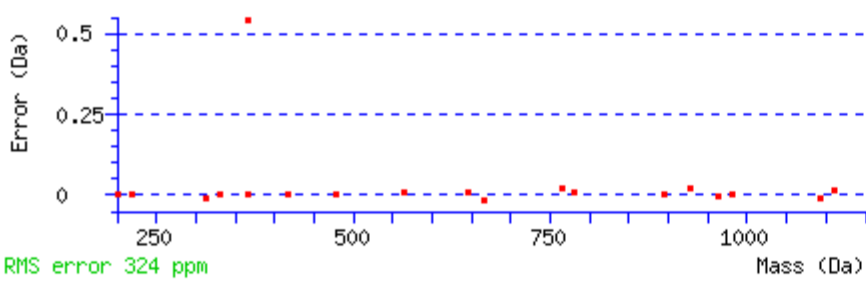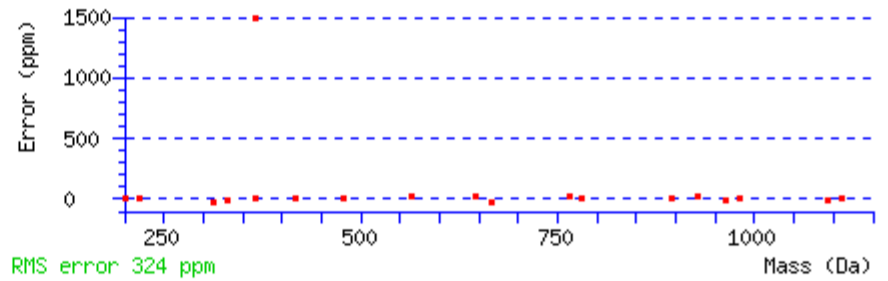

NCBI BLAST search of [SLESLDTSLFAK](#)

(Parameters: blastp, nr protein database, expect=20000, no filter, PAM30)

Other BLAST [web gateways](#)

All matches to this query

| Score | Mr(calc):   | Delta     | Sequence                     |
|-------|-------------|-----------|------------------------------|
| 51.6  | 1309.676529 | -0.000301 | <a href="#">SLESLDTSLFAK</a> |
| 8.7   | 1309.687790 | -0.011562 | <a href="#">DTLSILVPHGDK</a> |
| 1.3   | 1309.667313 | 0.008915  | <a href="#">MNHNRLGSLPR</a>  |

Mascot: <http://www.matrixscience.com/>

# Mascot Search Results

## Peptide View

MS/MS Fragmentation of **NQDATVYVGGGLDEK**

Found in **SF3B4\_HUMAN**, Splicing factor 3B subunit 4 OS=Homo sapiens GN=SF3B4 PE=1 SV=1

Match to Query 842887: 1507.718348 from(754.866450,2+) rtinseconds(2139) index(349969)

Title: Locus:1.1.1.1155.35

Data file C:\Program Files (x86)\Matrix Science\Mascot Daemon\mgf\3 TFD - Epitel - R2\mascot\_daemon\_merge.mgf

Click mouse within plot area to zoom in by factor of two about that point

Or, Plot from  to  Da

Label all possible matches  Label matches used for scoring

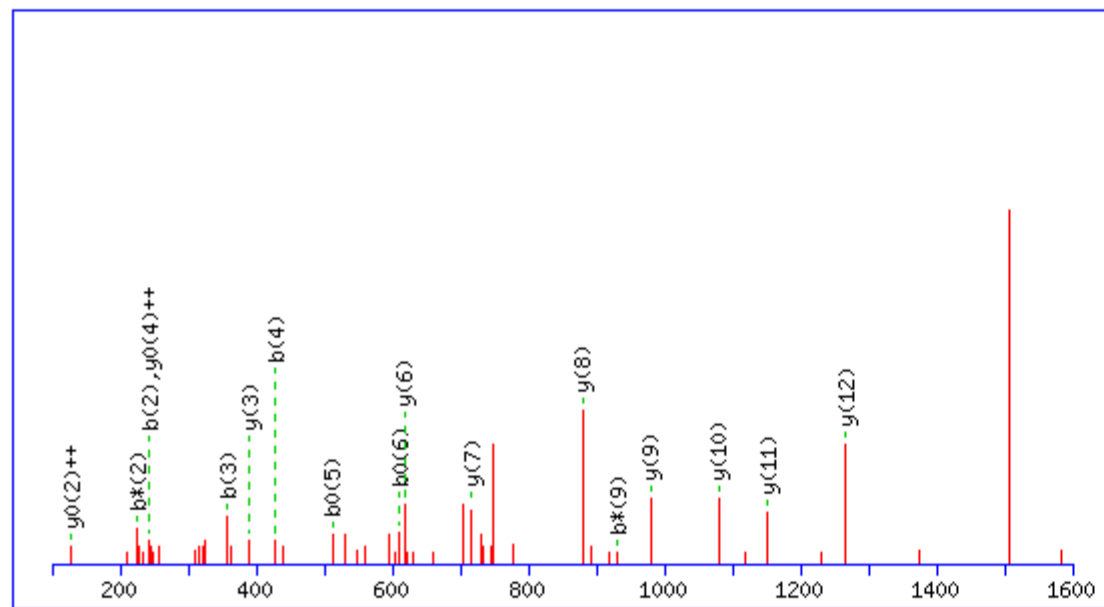

Monoisotopic mass of neutral peptide Mr(calc): 1507.715454

Fixed modifications: Carbamidomethyl (C) (apply to specified residues or termini only)

Ions Score: 58 Expect: 1.9e-005

Matches : 17/150 fragment ions using 24 most intense peaks ([help](#))

| #  | b                 | b <sup>++</sup> | b <sup>*</sup>    | b <sup>*++</sup> | b <sup>0</sup>    | b <sup>0++</sup> | Seq. | y                  | y <sup>++</sup> | y <sup>*</sup> | y <sup>*++</sup> | y <sup>0</sup> | y <sup>0++</sup>  | #  |
|----|-------------------|-----------------|-------------------|------------------|-------------------|------------------|------|--------------------|-----------------|----------------|------------------|----------------|-------------------|----|
| 1  | 115.050203        | 58.028740       | 98.023654         | 49.515465        |                   |                  | N    |                    |                 |                |                  |                |                   | 14 |
| 2  | <b>243.108781</b> | 122.058029      | <b>226.082232</b> | 113.544754       |                   |                  | Q    | 1394.679803        | 697.843540      | 1377.653254    | 689.330265       | 1376.669238    | 688.838257        | 13 |
| 3  | <b>358.135724</b> | 179.571500      | 341.109175        | 171.058226       | 340.125159        | 170.566218       | D    | <b>1266.621225</b> | 633.814251      | 1249.594676    | 625.300976       | 1248.610660    | 624.808968        | 12 |
| 4  | <b>429.172838</b> | 215.090057      | 412.146289        | 206.576783       | 411.162273        | 206.084775       | A    | <b>1151.594282</b> | 576.300779      | 1134.567733    | 567.787505       | 1133.583717    | 567.295497        | 11 |
| 5  | 530.220517        | 265.613897      | 513.193968        | 257.100622       | <b>512.209952</b> | 256.608614       | T    | <b>1080.557168</b> | 540.782222      | 1063.530619    | 532.268948       | 1062.546603    | 531.776940        | 10 |
| 6  | 629.288931        | 315.148104      | 612.262382        | 306.634829       | <b>611.278366</b> | 306.142821       | V    | <b>979.509489</b>  | 490.258383      | 962.482940     | 481.745108       | 961.498924     | 481.253100        | 9  |
| 7  | 792.352260        | 396.679768      | 775.325711        | 388.166494       | 774.341695        | 387.674486       | Y    | <b>880.441075</b>  | 440.724176      | 863.414526     | 432.210901       | 862.430510     | 431.718893        | 8  |
| 8  | 891.420674        | 446.213975      | 874.394125        | 437.700701       | 873.410109        | 437.208693       | V    | <b>717.377746</b>  | 359.192511      | 700.351197     | 350.679237       | 699.367181     | 350.187229        | 7  |
| 9  | 948.442138        | 474.724707      | <b>931.415589</b> | 466.211433       | 930.431573        | 465.719425       | G    | <b>618.309332</b>  | 309.658304      | 601.282783     | 301.145030       | 600.298767     | 300.653022        | 6  |
| 10 | 1005.463602       | 503.235439      | 988.437053        | 494.722165       | 987.453037        | 494.230157       | G    | 561.287868         | 281.147572      | 544.261319     | 272.634298       | 543.277303     | 272.142290        | 5  |
| 11 | 1118.547666       | 559.777471      | 1101.521117       | 551.264197       | 1100.537101       | 550.772189       | L    | 504.266404         | 252.636840      | 487.239855     | 244.123565       | 486.255839     | <b>243.631557</b> | 4  |
| 12 | 1233.574609       | 617.290943      | 1216.548060       | 608.777668       | 1215.564044       | 608.285660       | D    | <b>391.182340</b>  | 196.094808      | 374.155791     | 187.581533       | 373.171775     | 187.089525        | 3  |
| 13 | 1362.617202       | 681.812239      | 1345.590653       | 673.298965       | 1344.606637       | 672.806957       | E    | 276.155397         | 138.581336      | 259.128848     | 130.068062       | 258.144832     | <b>129.576054</b> | 2  |
| 14 |                   |                 |                   |                  |                   |                  | K    | 147.112804         | 74.060040       | 130.086255     | 65.546765        |                |                   | 1  |

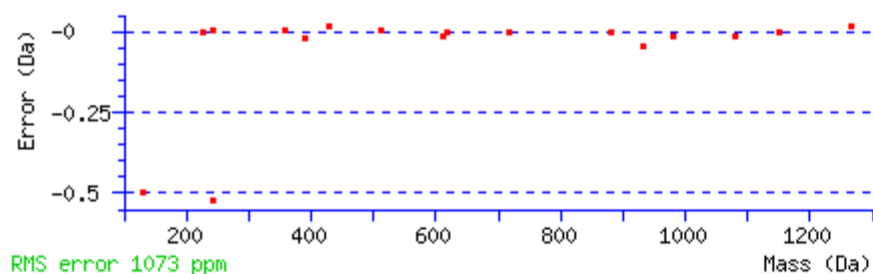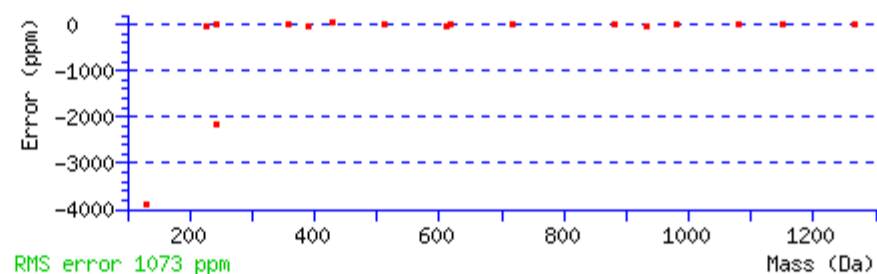

NCBI BLAST search of [NQDATVYVGGGLDEK](#)

(Parameters: blastp, nr protein database, expect=20000, no filter, PAM30)

Other BLAST [web gateways](#)

All matches to this query

| Score | Mr(calc):   | Delta    | Sequence                        |
|-------|-------------|----------|---------------------------------|
| 57.6  | 1507.715454 | 0.002894 | <a href="#">NQDATVYVGGGLDEK</a> |

Mascot: <http://www.matrixscience.com/>

**Peptide View**

MS/MS Fragmentation of **NPQNSSQSADGLR**

Found in **U2AF1\_HUMAN**, Splicing factor U2AF 35 kDa subunit OS=Homo sapiens GN=U2AF1 PE=1 SV=3

Match to Query 720013: 1372.634948 from(687.324750,2+) rtinseconds(979) index(243364)

Title: Locus:1.1.1.813.43

Data file C:\Program Files (x86)\Matrix Science\Mascot Daemon\mgf3 TFD - Epitel - R2\mascot\_daemon\_merge.mgf

Click mouse within plot area to zoom in by factor of two about that point

Or, Plot from  to  Da

Label all possible matches  Label matches used for scoring

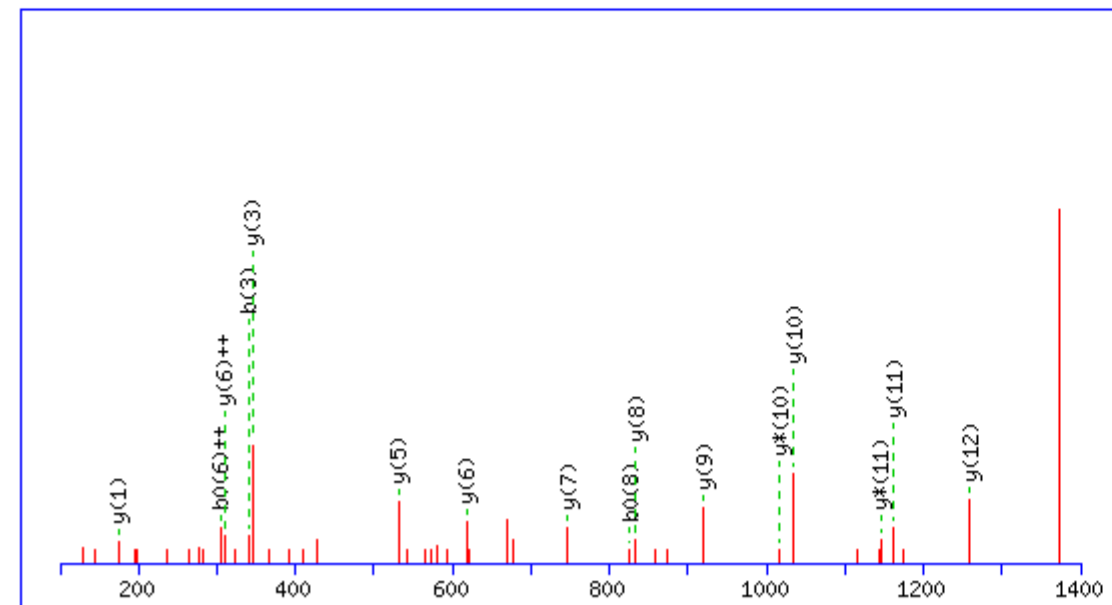

Monoisotopic mass of neutral peptide **Mr(calcd): 1372.633102**

Fixed modifications: Carbamidomethyl (C) (apply to specified residues or termini only)

Ions Score: 86 Expect: 3.5e-008

Matches : 16/130 fragment ions using 20 most intense peaks [\(help\)](#)

| #  | b                 | b <sup>++</sup> | b <sup>+</sup> | b <sup>+++</sup> | b <sup>0</sup>    | b <sup>0++</sup>  | Seq. | y                  | y <sup>++</sup>   | y <sup>+</sup>     | y <sup>+++</sup> | y <sup>0</sup> | y <sup>0++</sup> | #  |
|----|-------------------|-----------------|----------------|------------------|-------------------|-------------------|------|--------------------|-------------------|--------------------|------------------|----------------|------------------|----|
| 1  | 115.050203        | 58.028740       | 98.023654      | 49.515465        |                   |                   | N    |                    |                   |                    |                  |                |                  | 13 |
| 2  | 212.102967        | 106.555121      | 195.076418     | 98.041847        |                   |                   | P    | <b>1259.597468</b> | 630.302372        | 1242.570919        | 621.789098       | 1241.586903    | 621.297089       | 12 |
| 3  | <b>340.161545</b> | 170.584410      | 323.134996     | 162.071136       |                   |                   | Q    | <b>1162.544704</b> | 581.775990        | <b>1145.518155</b> | 573.262716       | 1144.534139    | 572.770707       | 11 |
| 4  | 454.204472        | 227.605874      | 437.177923     | 219.092600       |                   |                   | N    | <b>1034.486126</b> | 517.746701        | <b>1017.459577</b> | 509.233427       | 1016.475561    | 508.741419       | 10 |
| 5  | 541.236500        | 271.121888      | 524.209951     | 262.608614       | 523.225935        | 262.116606        | S    | <b>920.443199</b>  | 460.725237        | 903.416650         | 452.211963       | 902.432634     | 451.719955       | 9  |
| 6  | 628.268528        | 314.637902      | 611.241979     | 306.124628       | 610.257963        | <b>305.632620</b> | S    | <b>833.411171</b>  | 417.209223        | 816.384622         | 408.695949       | 815.400606     | 408.203941       | 8  |
| 7  | 756.327106        | 378.667191      | 739.300557     | 370.153917       | 738.316541        | 369.661909        | Q    | <b>746.379143</b>  | 373.693209        | 729.352594         | 365.179935       | 728.368578     | 364.687927       | 7  |
| 8  | 843.359134        | 422.183205      | 826.332585     | 413.669931       | <b>825.348569</b> | 413.177923        | S    | <b>618.320565</b>  | <b>309.663920</b> | 601.294016         | 301.150646       | 600.310000     | 300.658638       | 6  |
| 9  | 914.396248        | 457.701762      | 897.369699     | 449.188488       | 896.385683        | 448.696480        | A    | <b>531.288537</b>  | 266.147906        | 514.261988         | 257.634632       | 513.277972     | 257.142624       | 5  |
| 10 | 1029.423191       | 515.215234      | 1012.396642    | 506.701959       | 1011.412626       | 506.209951        | D    | 460.251423         | 230.629349        | 443.224874         | 222.116075       | 442.240858     | 221.624067       | 4  |
| 11 | 1086.444655       | 543.725966      | 1069.418106    | 535.212691       | 1068.434090       | 534.720683        | G    | <b>345.224480</b>  | 173.115878        | 328.197931         | 164.602603       |                |                  | 3  |
| 12 | 1199.528719       | 600.267997      | 1182.502170    | 591.754723       | 1181.518154       | 591.262715        | L    | 288.203016         | 144.605146        | 271.176467         | 136.091871       |                |                  | 2  |
| 13 |                   |                 |                |                  |                   |                   | R    | <b>175.118952</b>  | 88.063114         | 158.092403         | 79.549839        |                |                  | 1  |

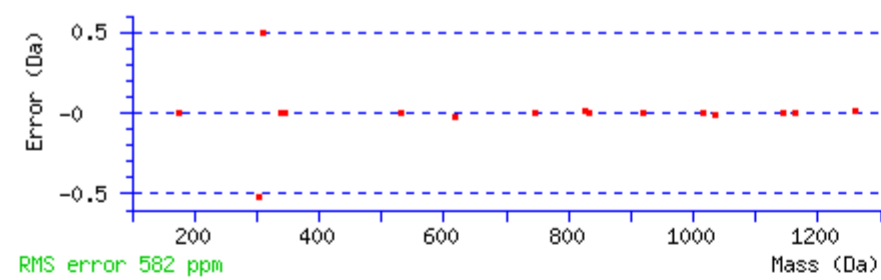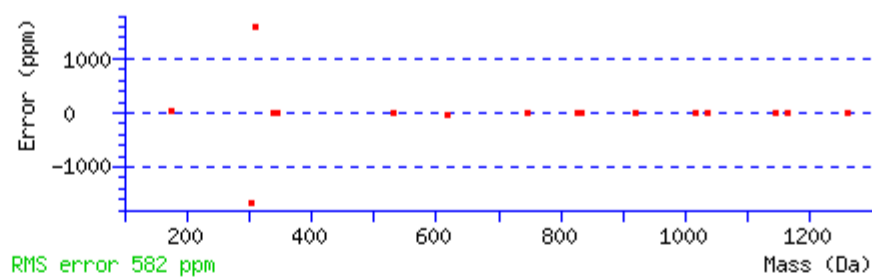

NCBI BLAST search of **NPQNSSQSADGLR**

(Parameters: blastp, nr protein database, expect=20000, no filter, PAM30)

Other BLAST [web gateways](#)

**All matches to this query**

| Score | Mr(calcd):  | Delta     | Sequence                      |
|-------|-------------|-----------|-------------------------------|
| 85.5  | 1372.633102 | 0.001846  | <a href="#">NPQNSSQSADGLR</a> |
| 7.3   | 1372.648361 | -0.013413 | <a href="#">DLQPRSHSYDR</a>   |
| 5.7   | 1372.648361 | -0.013413 | <a href="#">NKPSQGDPFNNR</a>  |
| 2.4   | 1372.637115 | -0.002167 | <a href="#">DHLNEYAGEGLR</a>  |
| 0.0   | 1372.621887 | 0.013061  | <a href="#">QDSPKPSGSGEPR</a> |

**MATRIX SCIENCE Mascot Search Results**

**Peptide View**

MS/MS Fragmentation of **NFAFLEFR**

Found in **U2AF2\_HUMAN**, Splicing factor U2AF 65 kDa subunit OS=Homo sapiens GN=U2AF2 PE=1 SV=4

Match to Query 15785: 1042.529388 from(522.271970,2+) rtinseconds(3528) index(52347)

Title: Locus:1.1.1.2762.3

Data file 2011-11-10 - TFD - EP 3-3.mgf

Click mouse within plot area to zoom in by factor of two about that point

Or, Plot from  to  Da

Label all possible matches  Label matches used for scoring

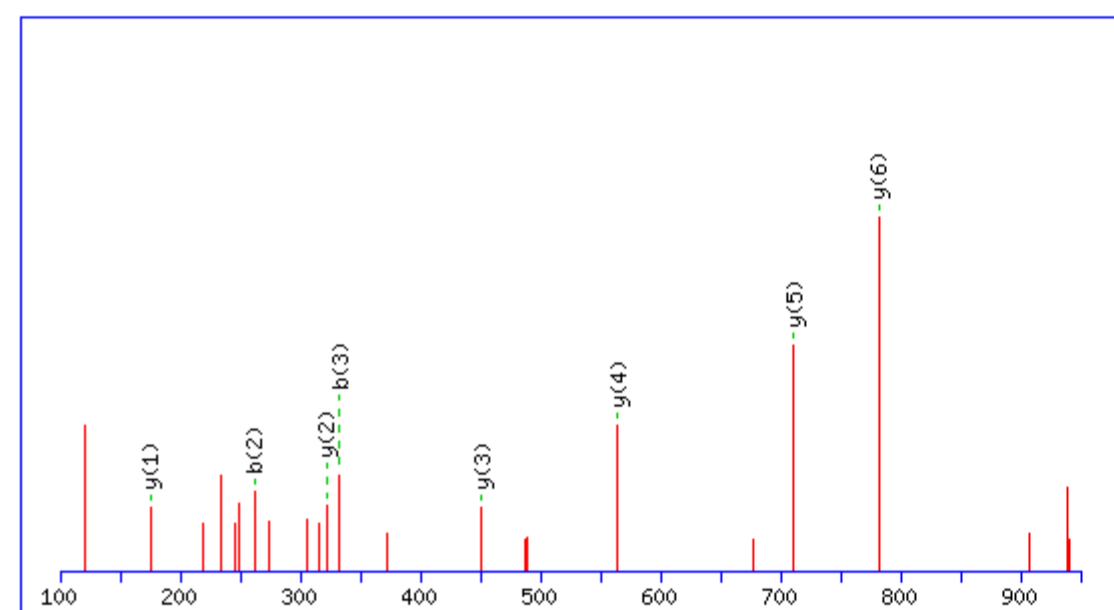

Monoisotopic mass of neutral peptide Mr(calc): 1042.523605

Fixed modifications: Propionamide (C) (apply to specified residues or termini only)

Ions Score: 41 Expect: 0.00036

Matches : 8/70 fragment ions using 15 most intense peaks [\(help\)](#)

| # | b                 | b <sup>++</sup> | b <sup>*</sup> | b <sup>*++</sup> | b <sup>0</sup> | b <sup>0++</sup> | Seq. | y                 | y <sup>++</sup> | y <sup>*</sup> | y <sup>*++</sup> | y <sup>0</sup> | y <sup>0++</sup> | # |
|---|-------------------|-----------------|----------------|------------------|----------------|------------------|------|-------------------|-----------------|----------------|------------------|----------------|------------------|---|
| 1 | 115.050203        | 58.028740       | 98.023654      | 49.515465        |                |                  | N    |                   |                 |                |                  |                |                  | 8 |
| 2 | <b>262.118617</b> | 131.562946      | 245.092068     | 123.049672       |                |                  | F    | 929.487965        | 465.247621      | 912.461416     | 456.734346       | 911.477400     | 456.242338       | 7 |
| 3 | <b>333.155731</b> | 167.081504      | 316.129182     | 158.568229       |                |                  | A    | <b>782.419551</b> | 391.713414      | 765.393002     | 383.200139       | 764.408986     | 382.708131       | 6 |
| 4 | 480.224145        | 240.615710      | 463.197596     | 232.102436       |                |                  | F    | <b>711.382437</b> | 356.194857      | 694.355888     | 347.681582       | 693.371872     | 347.189574       | 5 |
| 5 | 593.308209        | 297.157743      | 576.281660     | 288.644468       |                |                  | L    | <b>564.314023</b> | 282.660650      | 547.287474     | 274.147375       | 546.303458     | 273.655367       | 4 |
| 6 | 722.350802        | 361.679039      | 705.324253     | 353.165765       | 704.340237     | 352.673757       | E    | <b>451.229959</b> | 226.118617      | 434.203410     | 217.605343       | 433.219394     | 217.113335       | 3 |
| 7 | 869.419216        | 435.213246      | 852.392667     | 426.699972       | 851.408651     | 426.207964       | F    | <b>322.187366</b> | 161.597321      | 305.160817     | 153.084046       |                |                  | 2 |
| 8 |                   |                 |                |                  |                |                  | R    | <b>175.118952</b> | 88.063114       | 158.092403     | 79.549839        |                |                  | 1 |

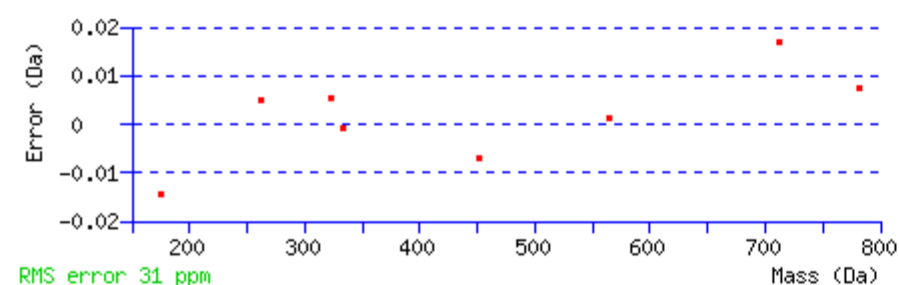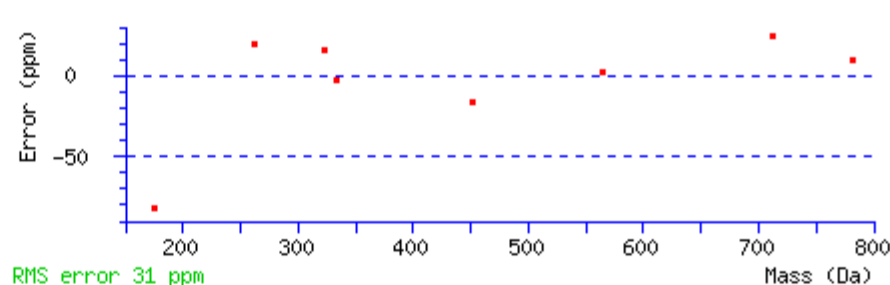

NCBI BLAST search of **NFAFLEFR**

(Parameters: blastp, nr protein database, expect=20000, no filter, PAM30)

Other BLAST [web gateways](#)

**All matches to this query**

| Score | Mr(calc):   | Delta     | Sequence                    |
|-------|-------------|-----------|-----------------------------|
| 40.7  | 1042.523605 | 0.005783  | <a href="#">NFAFLEFR</a>    |
| 3.7   | 1042.522949 | 0.006439  | <a href="#">MAASLPGPGSR</a> |
| 3.5   | 1042.522964 | 0.006424  | <a href="#">CVVQHTASK</a>   |
| 3.4   | 1042.533508 | -0.004120 | <a href="#">EVATYFSKV</a>   |
| 0.7   | 1042.534180 | -0.004792 | <a href="#">RCQPPLSR</a>    |
| 0.2   | 1042.534836 | -0.005448 | <a href="#">AGWWPALS</a>    |
| 0.1   | 1042.534180 | -0.004792 | <a href="#">CSLKHQTR</a>    |

# **MASCOT** Mascot Search Results

## Peptide View

MS/MS Fragmentation of **APVEGIGQPEK**

Found in **SPRY4\_HUMAN**, SPRY domain-containing protein 4 OS=Homo sapiens GN=SPRYD4 PE=1 SV=2

Match to Query 29768: 1123.586688 from(562.800620,2+) rtinseconds(1362) index(8775)

Title: Locus:1.1.1.1773.41

Data file 2011-11-10 - TFD - EP 4-6.mgf

Click mouse within plot area to zoom in by factor of two about that point

Or, Plot from  to  Da

Label all possible matches  Label matches used for scoring

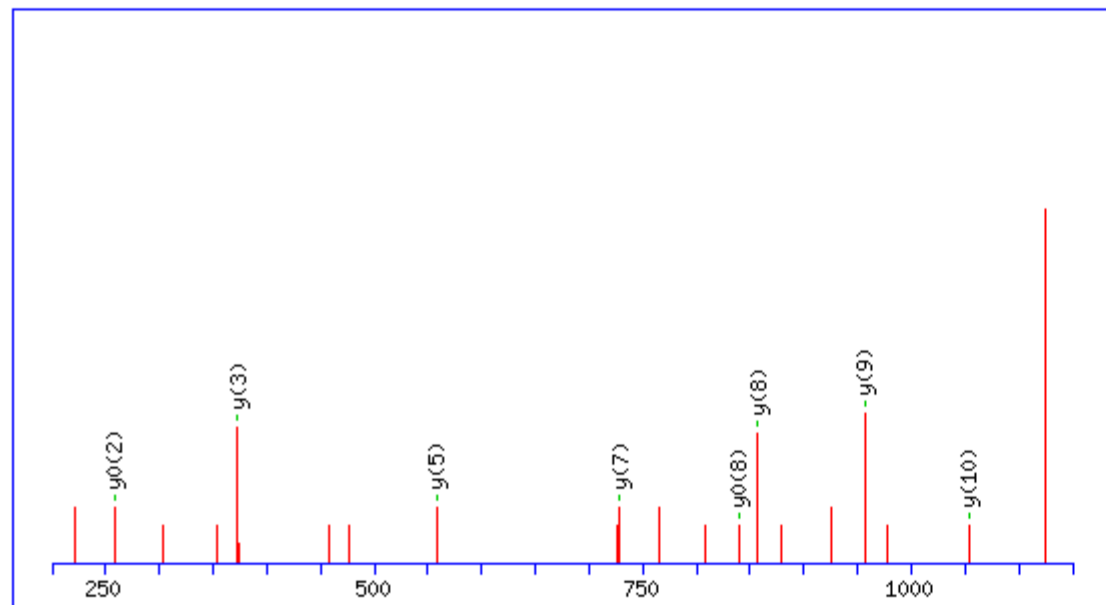

Monoisotopic mass of neutral peptide Mr(calc): 1123.587326

Fixed modifications: Propionamide (C) (apply to specified residues or termini only)

Ions Score: 41 Expect: 0.0003

Matches : 8/98 fragment ions using 14 most intense peaks [\(help\)](#)

| #  | b          | b <sup>++</sup> | b <sup>*</sup> | b <sup>*++</sup> | b <sup>0</sup> | b <sup>0++</sup> | Seq. | y                  | y <sup>++</sup> | y <sup>*</sup> | y <sup>*++</sup> | y <sup>0</sup>    | y <sup>0++</sup> | #  |
|----|------------|-----------------|----------------|------------------|----------------|------------------|------|--------------------|-----------------|----------------|------------------|-------------------|------------------|----|
| 1  | 72.044390  | 36.525833       |                |                  |                |                  | A    |                    |                 |                |                  |                   |                  | 11 |
| 2  | 169.097154 | 85.052215       |                |                  |                |                  | P    | <b>1053.557502</b> | 527.282389      | 1036.530953    | 518.769115       | 1035.546937       | 518.277107       | 10 |
| 3  | 268.165568 | 134.586422      |                |                  |                |                  | V    | <b>956.504738</b>  | 478.756007      | 939.478189     | 470.242733       | 938.494173        | 469.750725       | 9  |
| 4  | 397.208161 | 199.107719      |                |                  | 379.197596     | 190.102436       | E    | <b>857.436324</b>  | 429.221800      | 840.409775     | 420.708526       | <b>839.425759</b> | 420.216518       | 8  |
| 5  | 454.229625 | 227.618450      |                |                  | 436.219060     | 218.613168       | G    | <b>728.393731</b>  | 364.700504      | 711.367182     | 356.187229       | 710.383166        | 355.695221       | 7  |
| 6  | 567.313689 | 284.160483      |                |                  | 549.303124     | 275.155200       | I    | 671.372267         | 336.189772      | 654.345718     | 327.676497       | 653.361702        | 327.184489       | 6  |
| 7  | 624.335153 | 312.671215      |                |                  | 606.324588     | 303.665932       | G    | <b>558.288203</b>  | 279.647740      | 541.261654     | 271.134465       | 540.277638        | 270.642457       | 5  |
| 8  | 752.393731 | 376.700504      | 735.367182     | 368.187229       | 734.383166     | 367.695221       | Q    | 501.266739         | 251.137007      | 484.240190     | 242.623733       | 483.256174        | 242.131725       | 4  |
| 9  | 849.446495 | 425.226886      | 832.419946     | 416.713611       | 831.435930     | 416.221603       | P    | <b>373.208161</b>  | 187.107718      | 356.181612     | 178.594444       | 355.197596        | 178.102436       | 3  |
| 10 | 978.489088 | 489.748182      | 961.462539     | 481.234908       | 960.478523     | 480.742900       | E    | 276.155397         | 138.581336      | 259.128848     | 130.068062       | <b>258.144832</b> | 129.576054       | 2  |
| 11 |            |                 |                |                  |                |                  | K    | 147.112804         | 74.060040       | 130.086255     | 65.546765        |                   |                  | 1  |

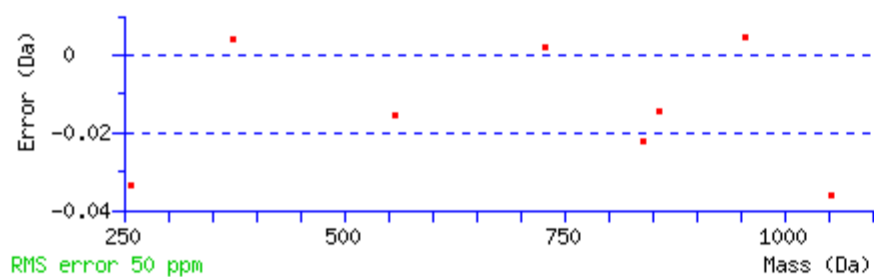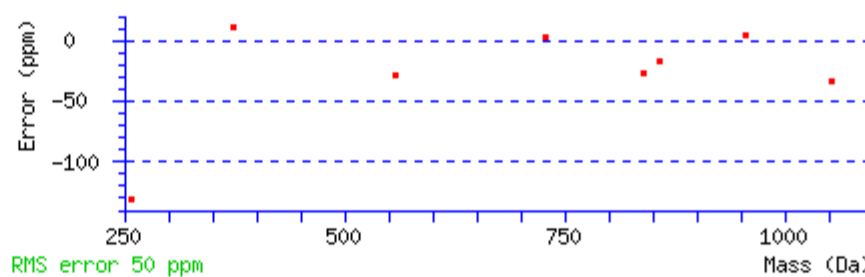

NCBI BLAST search of **APVEGIGQPEK**

(Parameters: blastp, nr protein database, expect=20000, no filter, PAM30)

Other BLAST [web gateways](#)

All matches to this query

| Score | Mr(calc):   | Delta     | Sequence                    |
|-------|-------------|-----------|-----------------------------|
| 41.3  | 1123.587326 | -0.000638 | <a href="#">APVEGIGQPEK</a> |
| 3.8   | 1123.584625 | 0.002063  | <a href="#">APRPREQDR</a>   |

Mascot: <http://www.matrixscience.com/>



# **MATRIX** SCIENCE Mascot Search Results

## Peptide View

MS/MS Fragmentation of **SINQPVAFVR**

Found in **SLIRP\_HUMAN**, SRA stem-loop-interacting RNA-binding protein, mitochondrial OS=Homo sapiens GN=SLIRP PE=1 SV=1

Match to Query 24208: 1129.624168 from(565.819360,2+) rtinseconds(2206) index(18980)

Title: Locus:1.1.1.2296.29

Data file 2011-11-10 - TFD - EP 4-7.mgf

Click mouse within plot area to zoom in by factor of two about that point

Or, Plot from  to  Da

Label all possible matches  Label matches used for scoring

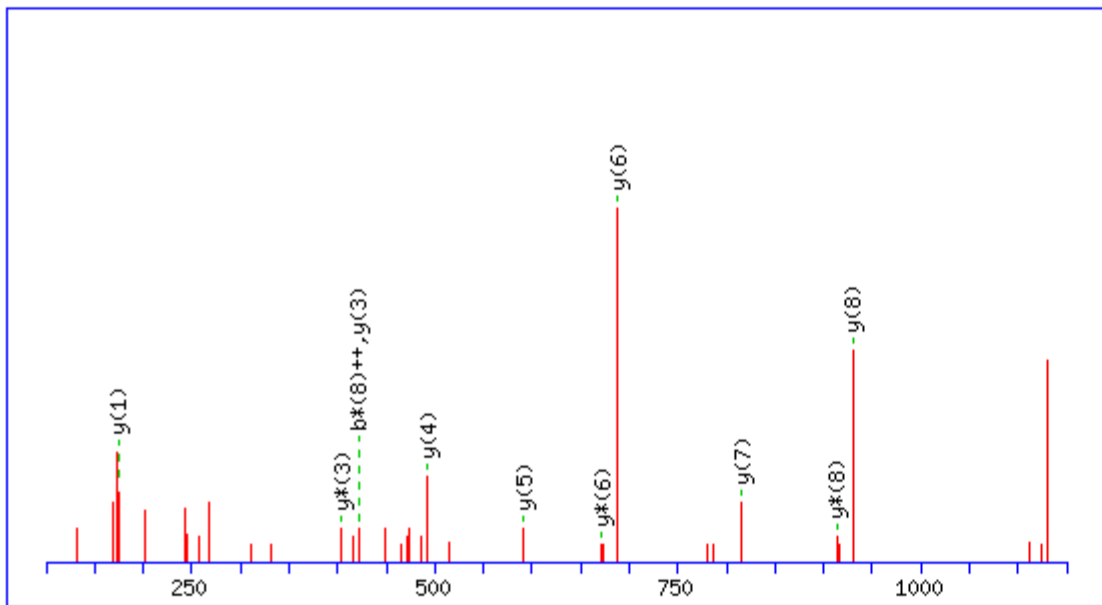

Monoisotopic mass of neutral peptide Mr(calc): 1129.624390

Fixed modifications: Propionamide (C) (apply to specified residues or termini only)

Ions Score: 51 Expect: 2.9e-005

Matches : 11/86 fragment ions using 17 most intense peaks [\(help\)](#)

| #  | b          | b <sup>++</sup> | b <sup>*</sup> | b <sup>*++</sup>  | b <sup>0</sup> | b <sup>0++</sup> | Seq. | y                 | y <sup>++</sup> | y <sup>*</sup>    | y <sup>*++</sup> | #  |
|----|------------|-----------------|----------------|-------------------|----------------|------------------|------|-------------------|-----------------|-------------------|------------------|----|
| 1  | 88.039304  | 44.523290       |                |                   | 70.028739      | 35.518008        | S    |                   |                 |                   |                  | 10 |
| 2  | 201.123368 | 101.065322      |                |                   | 183.112803     | 92.060039        | I    | 1043.599641       | 522.303458      | 1026.573092       | 513.790184       | 9  |
| 3  | 315.166295 | 158.086785      | 298.139746     | 149.573511        | 297.155730     | 149.081503       | N    | <b>930.515577</b> | 465.761426      | <b>913.489028</b> | 457.248152       | 8  |
| 4  | 443.224873 | 222.116075      | 426.198324     | 213.602800        | 425.214308     | 213.110792       | Q    | <b>816.472650</b> | 408.739963      | 799.446101        | 400.226688       | 7  |
| 5  | 540.277637 | 270.642457      | 523.251088     | 262.129182        | 522.267072     | 261.637174       | P    | <b>688.414072</b> | 344.710674      | <b>671.387523</b> | 336.197399       | 6  |
| 6  | 639.346051 | 320.176664      | 622.319502     | 311.663389        | 621.335486     | 311.171381       | V    | <b>591.361308</b> | 296.184292      | 574.334759        | 287.671017       | 5  |
| 7  | 710.383165 | 355.695221      | 693.356616     | 347.181946        | 692.372600     | 346.689938       | A    | <b>492.292894</b> | 246.650085      | 475.266345        | 238.136810       | 4  |
| 8  | 857.451579 | 429.229427      | 840.425030     | <b>420.716153</b> | 839.441014     | 420.224145       | F    | <b>421.255780</b> | 211.131528      | <b>404.229231</b> | 202.618253       | 3  |
| 9  | 956.519993 | 478.763634      | 939.493444     | 470.250360        | 938.509428     | 469.758352       | V    | 274.187366        | 137.597321      | 257.160817        | 129.084046       | 2  |
| 10 |            |                 |                |                   |                |                  | R    | <b>175.118952</b> | 88.063114       | 158.092403        | 79.549839        | 1  |

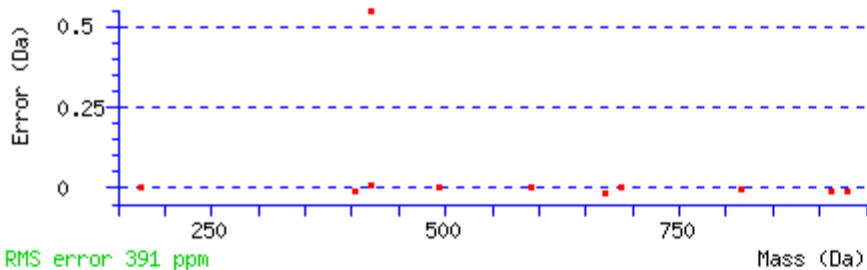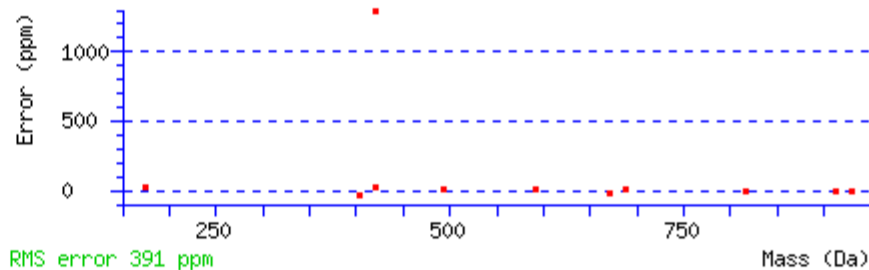

NCBI BLAST search of [SINQPVAFVR](#)

(Parameters: blastp, nr protein database, expect=20000, no filter, PAM30)

Other BLAST [web gateways](#)

All matches to this query

| Score | Mr(calc):   | Delta     | Sequence                   |
|-------|-------------|-----------|----------------------------|
| 51.0  | 1129.624390 | -0.000222 | <a href="#">SINQPVAFVR</a> |
| 2.7   | 1129.616516 | 0.007652  | <a href="#">CGLDLIVQAK</a> |

Mascot: <http://www.matrixscience.com/>

# MASCOT Search Results

## Peptide View

MS/MS Fragmentation of **VAAQNSAEVVR**

Found in **STC1\_HUMAN**, Stanniocalcin-1 OS=Homo sapiens GN=STC1 PE=1 SV=1

Match to Query 25846: 1142.605808 from(572.310180,2+) rtinseconds(920) index(1588)

Title: Locus:1.1.1.1705.40

Data file 2011-11-10 - TFD - EP 4-1.mgf

Click mouse within plot area to zoom in by factor of two about that point

Or, Plot from  to  Da

Label all possible matches  Label matches used for scoring

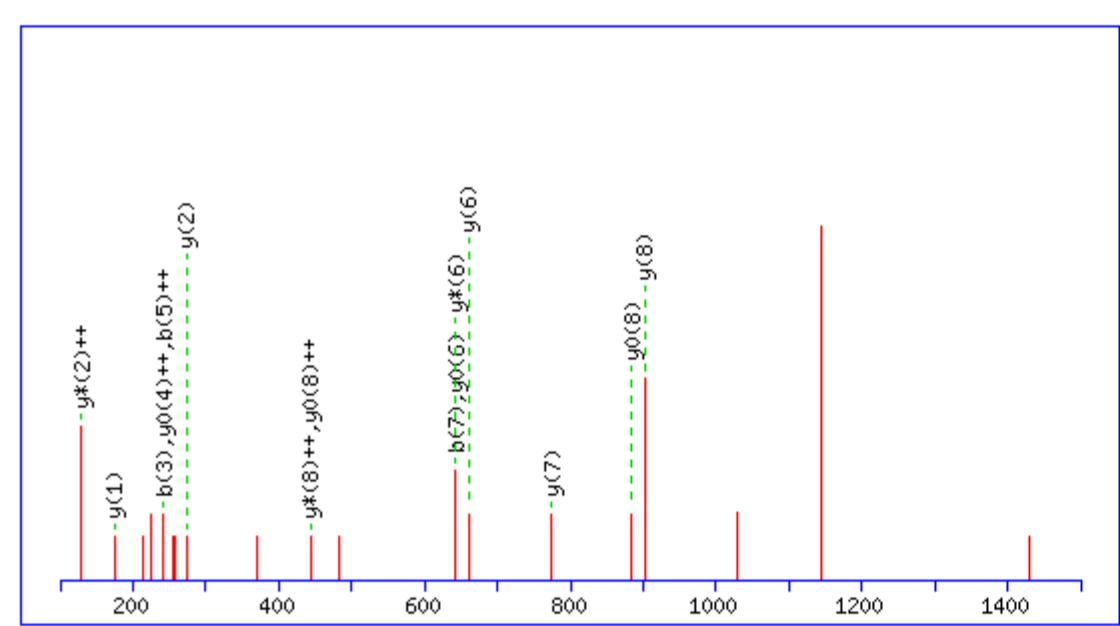

Monoisotopic mass of neutral peptide Mr(calc): 1142.604370

Fixed modifications: Propionamide (C) (apply to specified residues or termini only)

Ions Score: 33 Expect: 0.0063

Matches : 15/98 fragment ions using 17 most intense peaks [\(help\)](#)

| #  | b                 | b <sup>++</sup>   | b <sup>*</sup> | b <sup>+++</sup> | b <sup>0</sup> | b <sup>0++</sup> | Seq. | y                 | y <sup>++</sup> | y <sup>*</sup>    | y <sup>+++</sup>  | y <sup>0</sup>    | y <sup>0++</sup>  | #  |
|----|-------------------|-------------------|----------------|------------------|----------------|------------------|------|-------------------|-----------------|-------------------|-------------------|-------------------|-------------------|----|
| 1  | 100.075690        | 50.541483         |                |                  |                |                  | V    |                   |                 |                   |                   |                   |                   | 11 |
| 2  | 171.112804        | 86.060040         |                |                  |                |                  | A    | 1044.543248       | 522.775262      | 1027.516699       | 514.261988        | 1026.532683       | 513.769979        | 10 |
| 3  | <b>242.149918</b> | 121.578597        |                |                  |                |                  | A    | 973.506134        | 487.256705      | 956.479585        | 478.743430        | 955.495569        | 478.251422        | 9  |
| 4  | 370.208496        | 185.607886        | 353.181947     | 177.094612       |                |                  | Q    | <b>902.469020</b> | 451.738148      | 885.442471        | <b>443.224874</b> | <b>884.458455</b> | <b>442.732866</b> | 8  |
| 5  | 484.251423        | <b>242.629350</b> | 467.224874     | 234.116075       |                |                  | N    | <b>774.410442</b> | 387.708859      | 757.383893        | 379.195585        | 756.399877        | 378.703577        | 7  |
| 6  | 571.283451        | 286.145364        | 554.256902     | 277.632089       | 553.272886     | 277.140081       | S    | <b>660.367515</b> | 330.687395      | <b>643.340966</b> | 322.174121        | <b>642.356950</b> | 321.682113        | 6  |
| 7  | <b>642.320565</b> | 321.663921        | 625.294016     | 313.150646       | 624.310000     | 312.658638       | A    | 573.335487        | 287.171382      | 556.308938        | 278.658107        | 555.324922        | 278.166099        | 5  |
| 8  | 771.363158        | 386.185217        | 754.336609     | 377.671943       | 753.352593     | 377.179935       | E    | 502.298373        | 251.652824      | 485.271824        | 243.139550        | 484.287808        | <b>242.647542</b> | 4  |
| 9  | 870.431572        | 435.719424        | 853.405023     | 427.206150       | 852.421007     | 426.714142       | V    | 373.255780        | 187.131528      | 356.229231        | 178.618253        |                   |                   | 3  |
| 10 | 969.499986        | 485.253631        | 952.473437     | 476.740357       | 951.489421     | 476.248349       | V    | <b>274.187366</b> | 137.597321      | 257.160817        | <b>129.084046</b> |                   |                   | 2  |
| 11 |                   |                   |                |                  |                |                  | R    | <b>175.118952</b> | 88.063114       | 158.092403        | 79.549839         |                   |                   | 1  |

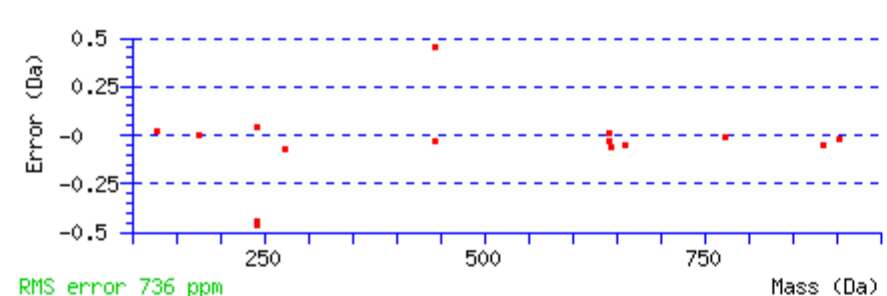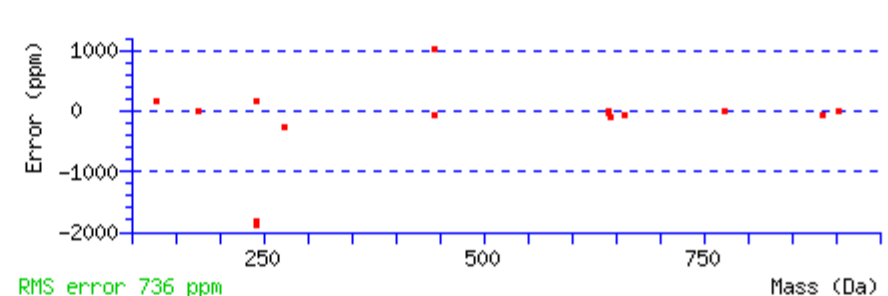

NCBI BLAST search of **VAAQNSAEVVR**

(Parameters: blastp, nr protein database, expect=20000, no filter, PAM30)

Other BLAST [web gateways](#)

## All matches to this query

| Score | Mr(calc):   | Delta     | Sequence                    |
|-------|-------------|-----------|-----------------------------|
| 33.0  | 1142.604370 | 0.001438  | <a href="#">VAAQNSAEVVR</a> |
| 25.1  | 1142.604355 | 0.001453  | <a href="#">IKELQNAGDR</a>  |
| 19.3  | 1142.615601 | -0.009793 | <a href="#">LQQDNIRTR</a>   |
| 14.3  | 1142.604355 | 0.001453  | <a href="#">LKQQNEDLR</a>   |
| 11.6  | 1142.615601 | -0.009793 | <a href="#">QLQRSQQQK</a>   |
| 10.3  | 1142.608383 | -0.002575 | <a href="#">IGAEVYHNLK</a>  |
| 8.1   | 1142.604385 | 0.001423  | <a href="#">KLVGSDQAPGR</a> |
| 7.5   | 1142.608398 | -0.002590 | <a href="#">QPSYVPAPLR</a>  |
| 6.5   | 1142.604370 | 0.001438  | <a href="#">QLIVANAGDSR</a> |
| 6.5   | 1142.615601 | -0.009793 | <a href="#">KPSASQRPTR</a>  |

# Mascot Search Results

## Peptide View

MS/MS Fragmentation of **TWKTDLPK**

Found in **STA13\_HUMAN**, StAR-related lipid transfer protein 13 OS=Homo sapiens GN=STARD13 PE=1 SV=2

Match to Query 15485: 987.535628 from(494.775090,2+) rtinseconds(1222) index(5006)

Title: Locus:1.1.1.1732.26

Data file 2011-11-10 - TFD - EP 3-6.mgf

Click mouse within plot area to zoom in by factor of two about that point

Or, Plot from  to  Da

Label all possible matches  Label matches used for scoring

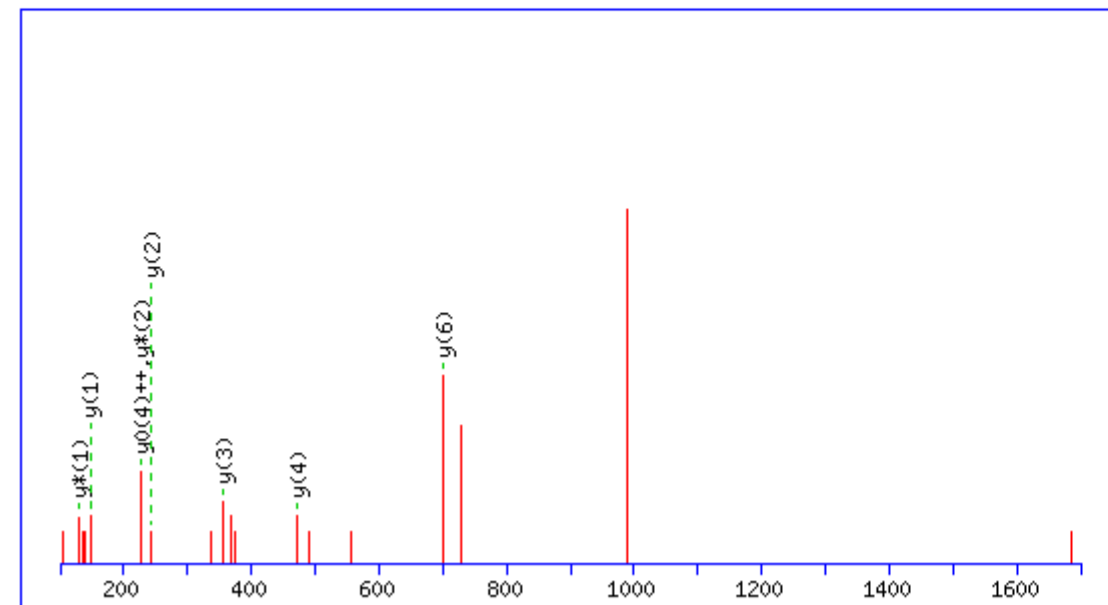

Monoisotopic mass of neutral peptide Mr(calc): 987.538925

Fixed modifications: Propionamide (C) (apply to specified residues or termini only)

Ions Score: 37 Expect: 0.0031

Matches : 8/74 fragment ions using 11 most intense peaks [\(help\)](#)

| # | b          | b <sup>++</sup> | b <sup>*</sup> | b <sup>***</sup> | b <sup>0</sup> | b <sup>0++</sup> | Seq. | y                 | y <sup>++</sup> | y <sup>*</sup>    | y <sup>***</sup> | y <sup>0</sup> | y <sup>0++</sup>  | # |
|---|------------|-----------------|----------------|------------------|----------------|------------------|------|-------------------|-----------------|-------------------|------------------|----------------|-------------------|---|
| 1 | 102.054955 | 51.531116       |                |                  | 84.044390      | 42.525833        | T    |                   |                 |                   |                  |                |                   | 8 |
| 2 | 288.134268 | 144.570772      |                |                  | 270.123703     | 135.565490       | W    | 887.498530        | 444.252903      | 870.471981        | 435.739629       | 869.487965     | 435.247621        | 7 |
| 3 | 416.229231 | 208.618254      | 399.202682     | 200.104979       | 398.218666     | 199.612971       | K    | <b>701.419217</b> | 351.213247      | 684.392668        | 342.699972       | 683.408652     | 342.207964        | 6 |
| 4 | 517.276910 | 259.142093      | 500.250361     | 250.628819       | 499.266345     | 250.136811       | T    | 573.324254        | 287.165765      | 556.297705        | 278.652491       | 555.313689     | 278.160483        | 5 |
| 5 | 632.303853 | 316.655565      | 615.277304     | 308.142290       | 614.293288     | 307.650282       | D    | <b>472.276575</b> | 236.641925      | 455.250026        | 228.128651       | 454.266010     | <b>227.636643</b> | 4 |
| 6 | 745.387917 | 373.197597      | 728.361368     | 364.684322       | 727.377352     | 364.192314       | L    | <b>357.249632</b> | 179.128454      | 340.223083        | 170.615180       |                |                   | 3 |
| 7 | 842.440681 | 421.723979      | 825.414132     | 413.210704       | 824.430116     | 412.718696       | P    | <b>244.165568</b> | 122.586422      | <b>227.139019</b> | 114.073148       |                |                   | 2 |
| 8 |            |                 |                |                  |                |                  | K    | <b>147.112804</b> | 74.060040       | <b>130.086255</b> | 65.546765        |                |                   | 1 |

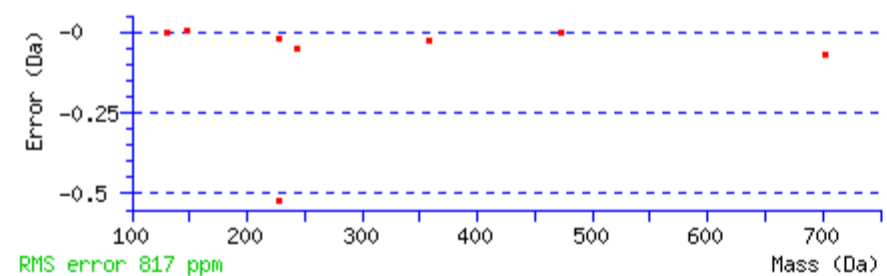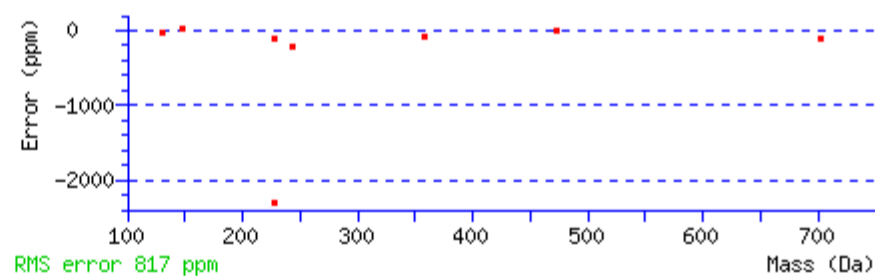

NCBI BLAST search of **TWKTDLPK**

(Parameters: blastp, nr protein database, expect=20000, no filter, PAM30)

Other BLAST [web gateways](#)

All matches to this query

| Score | Mr(calc):  | Delta     | Sequence                   |
|-------|------------|-----------|----------------------------|
| 36.8  | 987.538925 | -0.003297 | <a href="#">TWKTDLPK</a>   |
| 22.2  | 987.542282 | -0.006654 | <a href="#">ASTAGMILPK</a> |
| 21.2  | 987.534882 | 0.000746  | <a href="#">SRLDQELK</a>   |
| 20.8  | 987.534866 | 0.000762  | <a href="#">ENLESRLK</a>   |
| 12.3  | 987.534882 | 0.000746  | <a href="#">RISAEDGLK</a>  |
| 11.8  | 987.534897 | 0.000731  | <a href="#">DAGKAGQTLK</a> |
| 10.8  | 987.534897 | 0.000731  | <a href="#">ERTLQTPK</a>   |
| 8.8   | 987.542267 | -0.006639 | <a href="#">KINELMPK</a>   |
| 8.2   | 987.542267 | -0.006639 | <a href="#">KINELMPK</a>   |
| 8.1   | 987.534882 | 0.000746  | <a href="#">ENDLTLKR</a>   |

# MASCOT Search Results

## Peptide View

MS/MS Fragmentation of **AGLESSEGGGGPERPGAR**

Found in **SCD5\_HUMAN**, Stearoyl-CoA desaturase 5 OS=Homo sapiens GN=SCD5 PE=2 SV=2

Match to Query 45837: 1682.800992 from(561.940940,3+) rtinseconds(1182) index(2310)

Title: Locus:1.1.1.2073.35

Data file 2011-11-10 - TFD - EP 3-5.mgf

Click mouse within plot area to zoom in by factor of two about that point

Or, Plot from  to  Da

Label all possible matches  Label matches used for scoring

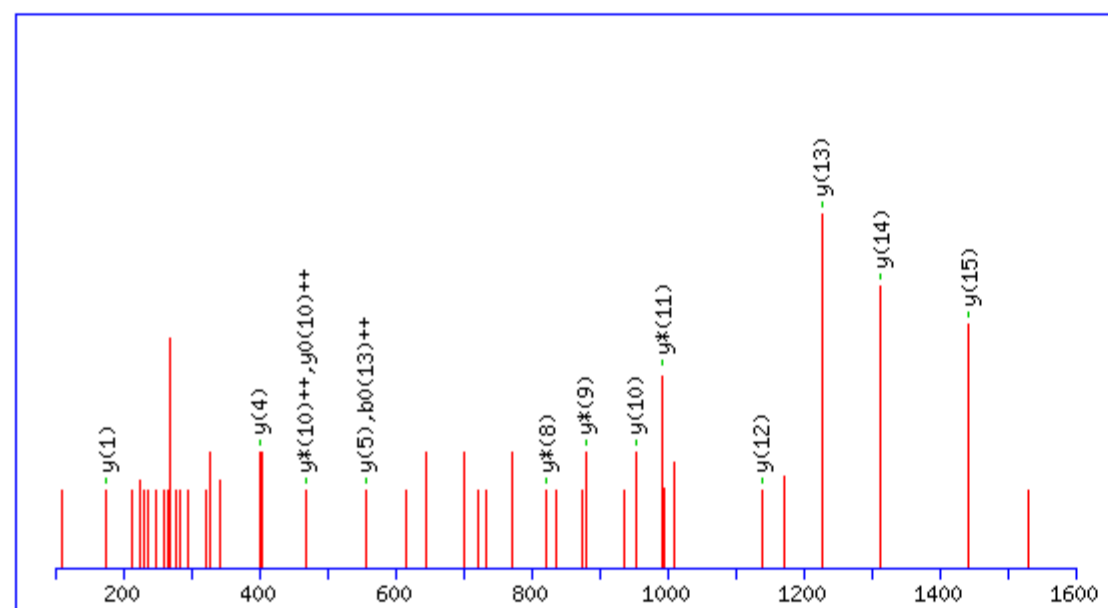

Monoisotopic mass of neutral peptide Mr(calc): 1682.797211

Fixed modifications: Propionamide (C) (apply to specified residues or termini only)

Ions Score: 44 Expect: 9.1e-005

Matches: 14/162 fragment ions using 23 most intense peaks [\(help\)](#)

| #  | b           | b <sup>++</sup> | b <sup>*</sup> | b <sup>*++</sup> | b <sup>0</sup> | b <sup>0++</sup>  | Seq. | y                  | y <sup>++</sup> | y <sup>*</sup>    | y <sup>*++</sup>  | y <sup>0</sup> | y <sup>0++</sup>  | #  |
|----|-------------|-----------------|----------------|------------------|----------------|-------------------|------|--------------------|-----------------|-------------------|-------------------|----------------|-------------------|----|
| 1  | 72.044390   | 36.525833       |                |                  |                |                   | A    |                    |                 |                   |                   |                |                   | 18 |
| 2  | 129.065854  | 65.036565       |                |                  |                |                   | G    | 1612.767388        | 806.887332      | 1595.740839       | 798.374058        | 1594.756823    | 797.882049        | 17 |
| 3  | 242.149918  | 121.578597      |                |                  |                |                   | L    | 1555.745924        | 778.376600      | 1538.719375       | 769.863326        | 1537.735359    | 769.371318        | 16 |
| 4  | 371.192511  | 186.099894      |                |                  | 353.181946     | 177.094611        | E    | <b>1442.661860</b> | 721.834568      | 1425.635311       | 713.321294        | 1424.651295    | 712.829285        | 15 |
| 5  | 458.224539  | 229.615907      |                |                  | 440.213974     | 220.610625        | S    | <b>1313.619267</b> | 657.313271      | 1296.592718       | 648.799997        | 1295.608702    | 648.307989        | 14 |
| 6  | 545.256567  | 273.131922      |                |                  | 527.246002     | 264.126639        | S    | <b>1226.587239</b> | 613.797258      | 1209.560690       | 605.283983        | 1208.576674    | 604.791975        | 13 |
| 7  | 674.299160  | 337.653218      |                |                  | 656.288595     | 328.647936        | E    | <b>1139.555211</b> | 570.281244      | 1122.528662       | 561.767969        | 1121.544646    | 561.275961        | 12 |
| 8  | 731.320624  | 366.163950      |                |                  | 713.310059     | 357.158668        | G    | 1010.512618        | 505.759947      | <b>993.486069</b> | 497.246672        | 992.502053     | 496.754664        | 11 |
| 9  | 788.342088  | 394.674682      |                |                  | 770.331523     | 385.669400        | G    | <b>953.491154</b>  | 477.249215      | 936.464605        | <b>468.735940</b> | 935.480589     | <b>468.243932</b> | 10 |
| 10 | 845.363552  | 423.185414      |                |                  | 827.352987     | 414.180132        | G    | 896.469690         | 448.738483      | <b>879.443141</b> | 440.225208        | 878.459125     | 439.733200        | 9  |
| 11 | 902.385016  | 451.696146      |                |                  | 884.374451     | 442.690864        | G    | 839.448226         | 420.227751      | <b>822.421677</b> | 411.714476        | 821.437661     | 411.222468        | 8  |
| 12 | 999.437780  | 500.222528      |                |                  | 981.427215     | 491.217246        | P    | 782.426762         | 391.717019      | 765.400213        | 383.203744        | 764.416197     | 382.711736        | 7  |
| 13 | 1128.480373 | 564.743825      |                |                  | 1110.469808    | <b>555.738542</b> | E    | 685.373998         | 343.190637      | 668.347449        | 334.677362        | 667.363433     | 334.185354        | 6  |
| 14 | 1284.581484 | 642.794380      | 1267.554935    | 634.281106       | 1266.570919    | 633.789098        | R    | <b>556.331405</b>  | 278.669340      | 539.304856        | 270.156066        |                |                   | 5  |
| 15 | 1381.634248 | 691.320762      | 1364.607699    | 682.807488       | 1363.623683    | 682.315480        | P    | <b>400.230294</b>  | 200.618785      | 383.203745        | 192.105510        |                |                   | 4  |
| 16 | 1438.655712 | 719.831494      | 1421.629163    | 711.318220       | 1420.645147    | 710.826212        | G    | 303.177530         | 152.092403      | 286.150981        | 143.579128        |                |                   | 3  |
| 17 | 1509.692826 | 755.350051      | 1492.666277    | 746.836777       | 1491.682261    | 746.344768        | A    | 246.156066         | 123.581671      | 229.129517        | 115.068396        |                |                   | 2  |
| 18 |             |                 |                |                  |                |                   | R    | <b>175.118952</b>  | 88.063114       | 158.092403        | 79.549839         |                |                   | 1  |

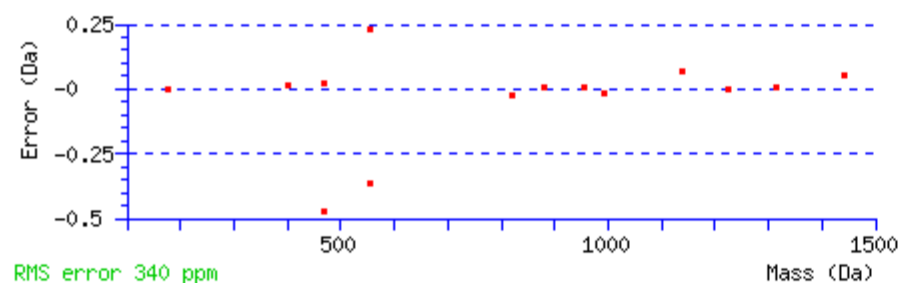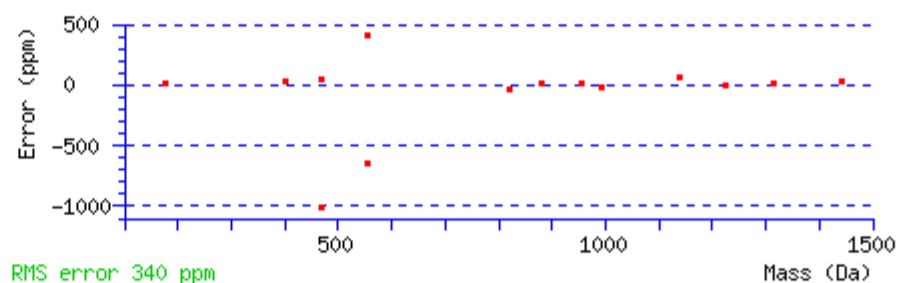

NCBI BLAST search of [AGLESSEGGGGPERPGAR](#)

(Parameters: blastp, nr protein database, expect=20000, no filter, PAM30)

Other BLAST [web gateways](#)

## All matches to this query

| Score | Mr(calc):   | Delta     | Sequence                           |
|-------|-------------|-----------|------------------------------------|
| 43.8  | 1682.797211 | 0.003781  | <a href="#">AGLESSEGGGGPERPGAR</a> |
| 0.7   | 1682.804626 | -0.003634 | <a href="#">IPMPSPSPQPRGAPR</a>    |

# MASCOT SCIENCE Mascot Search Results

## Peptide View

MS/MS Fragmentation of **TGAELVTCGSVLK**

Found in **SDF2L\_HUMAN**, Stromal cell-derived factor 2-like protein 1 OS=Homo sapiens GN=SDF2L1 PE=1 SV=2

Match to Query 38509: 1347.696768 from(674.855660,2+) rtinseconds(2239) index(24003)

Title: Locus:1.1.1.2125.42

Data file 2011-11-14 - TFD - EP 8-6.mgf

Click mouse within plot area to zoom in by factor of two about that point

Or, Plot from  to  Da

Label all possible matches  Label matches used for scoring

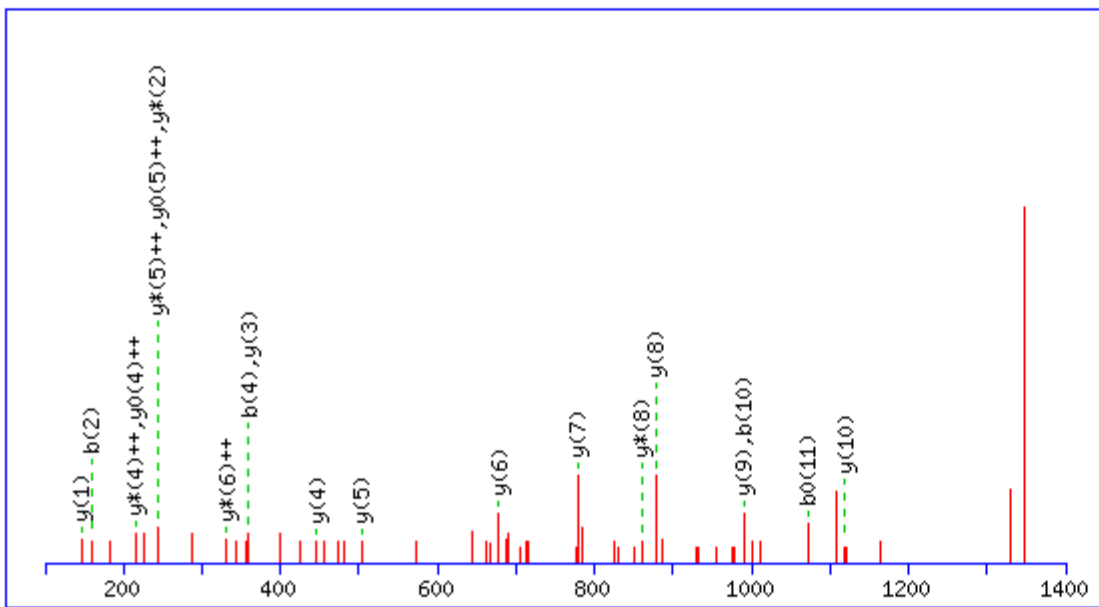

Monoisotopic mass of neutral peptide  $M_r(\text{calc})$ : 1347.706802

Fixed modifications: Propionamide (C) (apply to specified residues or termini only)

Ions Score: 42 Expect: 0.0009

Matches : 20/114 fragment ions using 45 most intense peaks [\(help\)](#)

| #  | b                 | b <sup>++</sup> | b <sup>0</sup>     | b <sup>0++</sup> | Seq. | y                  | y <sup>++</sup> | y <sup>*</sup>    | y <sup>*++</sup>  | y <sup>0</sup> | y <sup>0++</sup>  | #  |
|----|-------------------|-----------------|--------------------|------------------|------|--------------------|-----------------|-------------------|-------------------|----------------|-------------------|----|
| 1  | 102.054955        | 51.531116       | 84.044390          | 42.525833        | T    |                    |                 |                   |                   |                |                   | 13 |
| 2  | <b>159.076419</b> | 80.041847       | 141.065854         | 71.036565        | G    | 1247.666401        | 624.336839      | 1230.639852       | 615.823564        | 1229.655836    | 615.331556        | 12 |
| 3  | 230.113533        | 115.560404      | 212.102968         | 106.555122       | A    | 1190.644937        | 595.826107      | 1173.618388       | 587.312832        | 1172.634372    | 586.820824        | 11 |
| 4  | <b>359.156126</b> | 180.081701      | 341.145561         | 171.076419       | E    | <b>1119.607823</b> | 560.307550      | 1102.581274       | 551.794275        | 1101.597258    | 551.302267        | 10 |
| 5  | 472.240190        | 236.623733      | 454.229625         | 227.618451       | L    | <b>990.565230</b>  | 495.786253      | 973.538681        | 487.272978        | 972.554665     | 486.780970        | 9  |
| 6  | 571.308604        | 286.157940      | 553.298039         | 277.152658       | V    | <b>877.481166</b>  | 439.244221      | <b>860.454617</b> | 430.730946        | 859.470601     | 430.238938        | 8  |
| 7  | 672.356283        | 336.681780      | 654.345718         | 327.676497       | T    | <b>778.412752</b>  | 389.710014      | 761.386203        | 381.196739        | 760.402187     | 380.704731        | 7  |
| 8  | 846.402582        | 423.704929      | 828.392017         | 414.699647       | C    | <b>677.365073</b>  | 339.186174      | 660.338524        | <b>330.672900</b> | 659.354508     | 330.180892        | 6  |
| 9  | 903.424046        | 452.215661      | 885.413481         | 443.210379       | G    | <b>503.318774</b>  | 252.163025      | 486.292225        | <b>243.649750</b> | 485.308209     | <b>243.157742</b> | 5  |
| 10 | <b>990.456074</b> | 495.731675      | 972.445509         | 486.726393       | S    | <b>446.297310</b>  | 223.652293      | 429.270761        | <b>215.139018</b> | 428.286745     | <b>214.647010</b> | 4  |
| 11 | 1089.524488       | 545.265882      | <b>1071.513923</b> | 536.260600       | V    | <b>359.265282</b>  | 180.136279      | 342.238733        | 171.623004        |                |                   | 3  |
| 12 | 1202.608552       | 601.807914      | 1184.597987        | 592.802631       | L    | 260.196868         | 130.602072      | <b>243.170319</b> | 122.088797        |                |                   | 2  |
| 13 |                   |                 |                    |                  | K    | <b>147.112804</b>  | 74.060040       | 130.086255        | 65.546765         |                |                   | 1  |

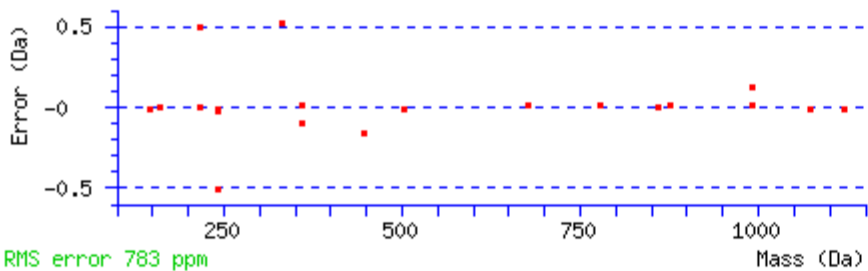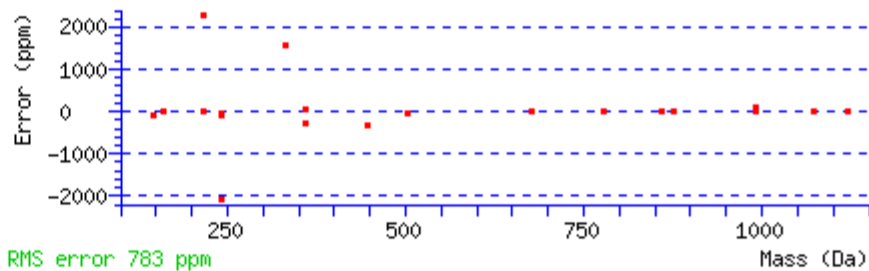

NCBI BLAST search of **TGAELVTCGSVLK**

(Parameters: blastp, nr protein database, expect=20000, no filter, PAM30)

Other BLAST [web gateways](#)

All matches to this query

| Score | $M_r(\text{calc})$ : | Delta     | Sequence                      |
|-------|----------------------|-----------|-------------------------------|
| 41.7  | 1347.706802          | -0.010034 | <a href="#">TGAELVTCGSVLK</a> |

Mascot: <http://www.matrixscience.com/>

# MASCOT SCIENCE Mascot Search Results

## Peptide View

MS/MS Fragmentation of **ALDTVLFGPPLLTR**

Found in **STIMI\_HUMAN**, Stromal interaction molecule 1 OS=Homo sapiens GN=STIM1 PE=1 SV=3

Match to Query 48118: 1511.879448 from(756.947000,2+) rtinseconds(3859) index(57073)

Title: Locus:1.1.1.2897.38

Data file 2011-11-10 - TFD - EP 3-2.mgf

Click mouse within plot area to zoom in by factor of two about that point

Or, Plot from  to  Da

Label all possible matches  Label matches used for scoring

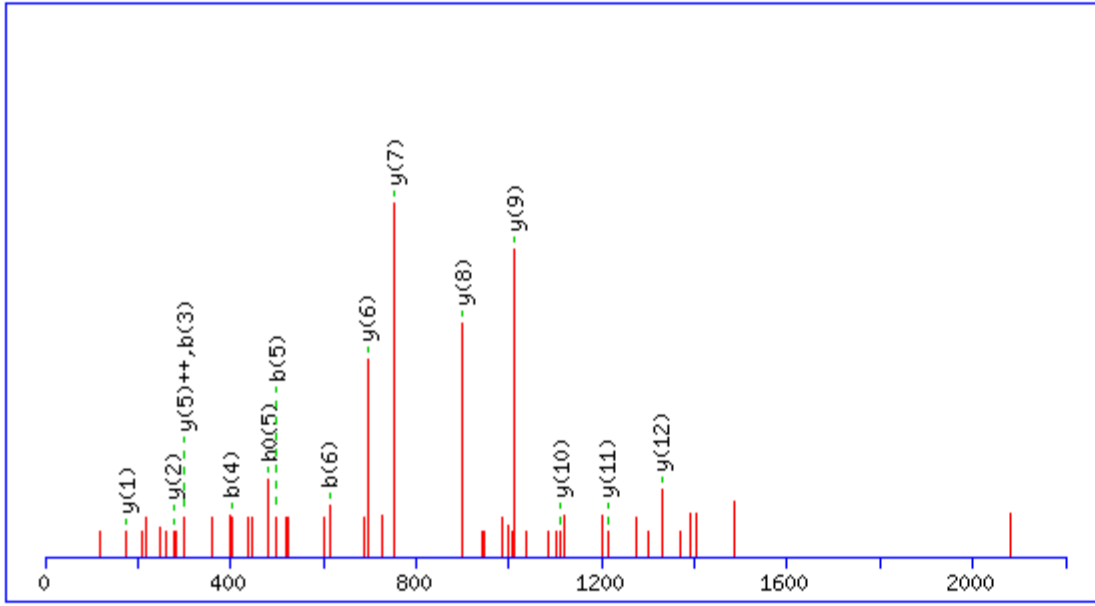

Monoisotopic mass of neutral peptide Mr(calc): 1511.871170

Fixed modifications: Propionamide (C) (apply to specified residues or termini only)

Ions Score: 42 Expect: 0.00021

Matches : 15/124 fragment ions using 40 most intense peaks [\(help\)](#)

| #  | b                 | b <sup>++</sup> | b <sup>0</sup>    | b <sup>0++</sup> | Seq. | y                  | y <sup>++</sup>   | y <sup>*</sup> | y <sup>*++</sup> | y <sup>0</sup> | y <sup>0++</sup> | #  |
|----|-------------------|-----------------|-------------------|------------------|------|--------------------|-------------------|----------------|------------------|----------------|------------------|----|
| 1  | 72.044390         | 36.525833       |                   |                  | A    |                    |                   |                |                  |                |                  | 14 |
| 2  | 185.128454        | 93.067865       |                   |                  | L    | 1441.841329        | 721.424303        | 1424.814780    | 712.911028       | 1423.830764    | 712.419020       | 13 |
| 3  | <b>300.155397</b> | 150.581336      | 282.144832        | 141.576054       | D    | <b>1328.757265</b> | 664.882271        | 1311.730716    | 656.368996       | 1310.746700    | 655.876988       | 12 |
| 4  | <b>401.203076</b> | 201.105176      | 383.192511        | 192.099894       | T    | <b>1213.730322</b> | 607.368799        | 1196.703773    | 598.855525       | 1195.719757    | 598.363517       | 11 |
| 5  | <b>500.271490</b> | 250.639383      | <b>482.260925</b> | 241.634101       | V    | <b>1112.682643</b> | 556.844960        | 1095.656094    | 548.331685       | 1094.672078    | 547.839677       | 10 |
| 6  | <b>613.355554</b> | 307.181415      | 595.344989        | 298.176133       | L    | <b>1013.614229</b> | 507.310753        | 996.587680     | 498.797478       | 995.603664     | 498.305470       | 9  |
| 7  | 760.423968        | 380.715622      | 742.413403        | 371.710340       | F    | <b>900.530165</b>  | 450.768721        | 883.503616     | 442.255446       | 882.519600     | 441.763438       | 8  |
| 8  | 817.445432        | 409.226354      | 799.434867        | 400.221072       | G    | <b>753.461751</b>  | 377.234514        | 736.435202     | 368.721239       | 735.451186     | 368.229231       | 7  |
| 9  | 914.498196        | 457.752736      | 896.487631        | 448.747454       | P    | <b>696.440287</b>  | 348.723782        | 679.413738     | 340.210507       | 678.429722     | 339.718499       | 6  |
| 10 | 1011.550960       | 506.279118      | 993.540395        | 497.273836       | P    | 599.387523         | <b>300.197400</b> | 582.360974     | 291.684125       | 581.376958     | 291.192117       | 5  |
| 11 | 1124.635024       | 562.821150      | 1106.624459       | 553.815868       | L    | 502.334759         | 251.671017        | 485.308210     | 243.157743       | 484.324194     | 242.665735       | 4  |
| 12 | 1237.719088       | 619.363182      | 1219.708523       | 610.357900       | L    | 389.250695         | 195.128985        | 372.224146     | 186.615711       | 371.240130     | 186.123703       | 3  |
| 13 | 1338.766767       | 669.887022      | 1320.756202       | 660.881739       | T    | <b>276.166631</b>  | 138.586953        | 259.140082     | 130.073679       | 258.156066     | 129.581671       | 2  |
| 14 |                   |                 |                   |                  | R    | <b>175.118952</b>  | 88.063114         | 158.092403     | 79.549839        |                |                  | 1  |

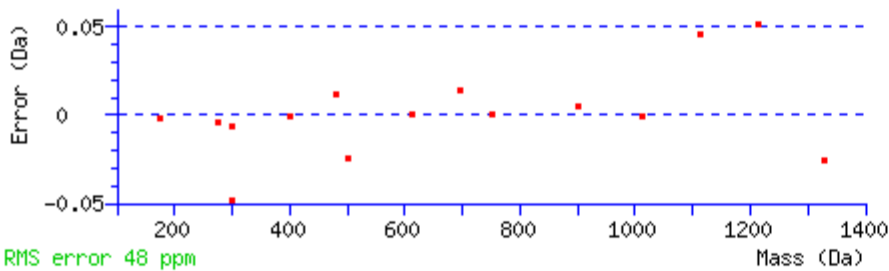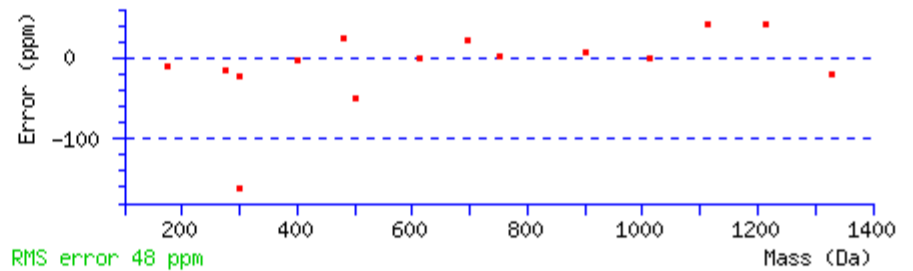

NCBI BLAST search of [ALDTVLFGPPLLTR](#)

(Parameters: blastp, nr protein database, expect=20000, no filter, PAM30)

Other BLAST [web gateways](#)

## All matches to this query

| Score | Mr(calc):   | Delta    | Sequence                       |
|-------|-------------|----------|--------------------------------|
| 42.2  | 1511.871170 | 0.008278 | <a href="#">ALDTVLFGPPLLTR</a> |

Mascot: <http://www.matrixscience.com/>

# MASCOT SCIENCE Mascot Search Results

## Peptide View

MS/MS Fragmentation of **IDAAISDK**

Found in **MMP3\_HUMAN**, Stromelysin-1 OS=Homo sapiens GN=MMP3 PE=1 SV=2

Match to Query 2622: 831.426488 from(416.720520,2+) rtinseconds(1214) index(7059)

Title: Locus:1.1.1.1859.7

Data file 2011-11-12 - TFD - EP 6-2.mgf

Click mouse within plot area to zoom in by factor of two about that point

Or, Plot from  to  Da

Label all possible matches  Label matches used for scoring

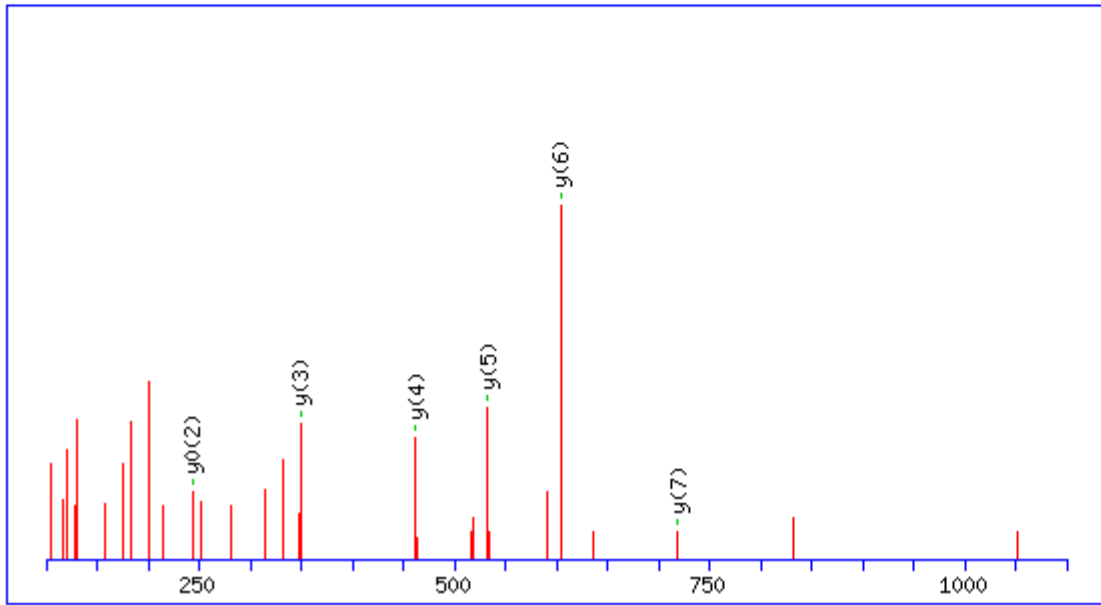

Monoisotopic mass of neutral peptide Mr(calc): 831.433777

Fixed modifications: Propionamide (C) (apply to specified residues or termini only)

Ions Score: 42 Expect: 0.0011

Matches : 6/66 fragment ions using 8 most intense peaks ([help](#))

| # | b          | b <sup>++</sup> | b <sup>0</sup> | b <sup>0++</sup> | Seq. | y          | y <sup>++</sup> | y <sup>*</sup> | y <sup>*++</sup> | y <sup>0</sup> | y <sup>0++</sup> | # |
|---|------------|-----------------|----------------|------------------|------|------------|-----------------|----------------|------------------|----------------|------------------|---|
| 1 | 114.091340 | 57.549308       |                |                  | I    |            |                 |                |                  |                |                  | 8 |
| 2 | 229.118283 | 115.062779      | 211.107718     | 106.057497       | D    | 719.357010 | 360.182143      | 702.330461     | 351.668869       | 701.346445     | 351.176861       | 7 |
| 3 | 300.155397 | 150.581336      | 282.144832     | 141.576054       | A    | 604.330067 | 302.668672      | 587.303518     | 294.155397       | 586.319502     | 293.663389       | 6 |
| 4 | 371.192511 | 186.099894      | 353.181946     | 177.094611       | A    | 533.292953 | 267.150115      | 516.266404     | 258.636840       | 515.282388     | 258.144832       | 5 |
| 5 | 484.276575 | 242.641926      | 466.266010     | 233.636643       | I    | 462.255839 | 231.631557      | 445.229290     | 223.118283       | 444.245274     | 222.626275       | 4 |
| 6 | 571.308603 | 286.157940      | 553.298038     | 277.152657       | S    | 349.171775 | 175.089525      | 332.145226     | 166.576251       | 331.161210     | 166.084243       | 3 |
| 7 | 686.335546 | 343.671411      | 668.324981     | 334.666129       | D    | 262.139747 | 131.573511      | 245.113198     | 123.060237       | 244.129182     | 122.568229       | 2 |
| 8 |            |                 |                |                  | K    | 147.112804 | 74.060040       | 130.086255     | 65.546765        |                |                  | 1 |

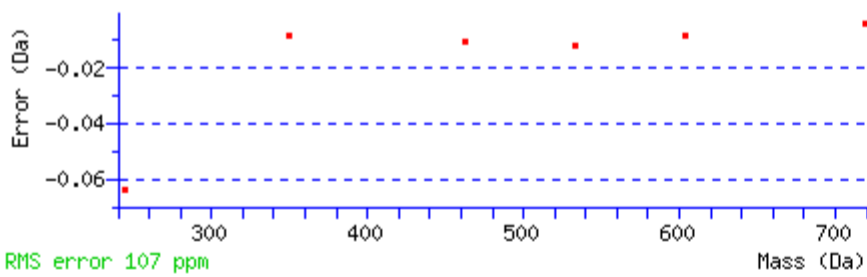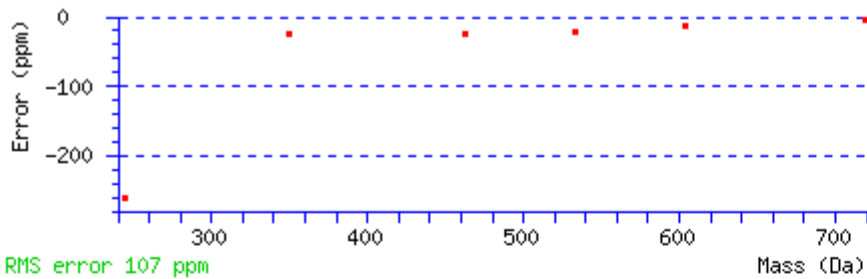

NCBI BLAST search of **IDAAISDK**

(Parameters: blastp, nr protein database, expect=20000, no filter, PAM30)

Other BLAST [web gateways](#)

## All matches to this query

| Score | Mr(calc):  | Delta     | Sequence                 |
|-------|------------|-----------|--------------------------|
| 42.3  | 831.433777 | -0.007289 | <a href="#">IDAAISDK</a> |
| 23.6  | 831.427246 | -0.000758 | <a href="#">EVAALCR</a>  |
| 15.2  | 831.427246 | -0.000758 | <a href="#">LEQLCR</a>   |
| 10.6  | 831.427246 | -0.000758 | <a href="#">NQQLMAK</a>  |
| 10.4  | 831.427246 | -0.000758 | <a href="#">LDLAACR</a>  |
| 10.3  | 831.427261 | -0.000773 | <a href="#">LVSSPCR</a>  |
| 8.3   | 831.423874 | 0.002614  | <a href="#">LWAESAR</a>  |
| 8.0   | 831.427902 | -0.001414 | <a href="#">LWAWEK</a>   |
| 7.8   | 831.427246 | -0.000758 | <a href="#">LQELCR</a>   |
| 4.6   | 831.433792 | -0.007304 | <a href="#">IGEVSSPK</a> |

**MATRIX SCIENCE Mascot Search Results**

**Peptide View**

MS/MS Fragmentation of **FSFGLLDLPFR**

Found in **SMHD1\_HUMAN**, Structural maintenance of chromosomes flexible hinge domain-containing protein 1 OS=Homo sapiens GN=SMCHD1 PE=1 SV=2

Match to Query 36265: 1310.702028 from(656.358290,2+) rtinseconds(4496) index(65850)

Title: Locus:1.1.1.3095.12

Data file 2011-11-14 - TFD - EP 8-1.mgf

Click mouse within plot area to zoom in by factor of two about that point

Or, Plot from  to  Da

Label all possible matches  Label matches used for scoring

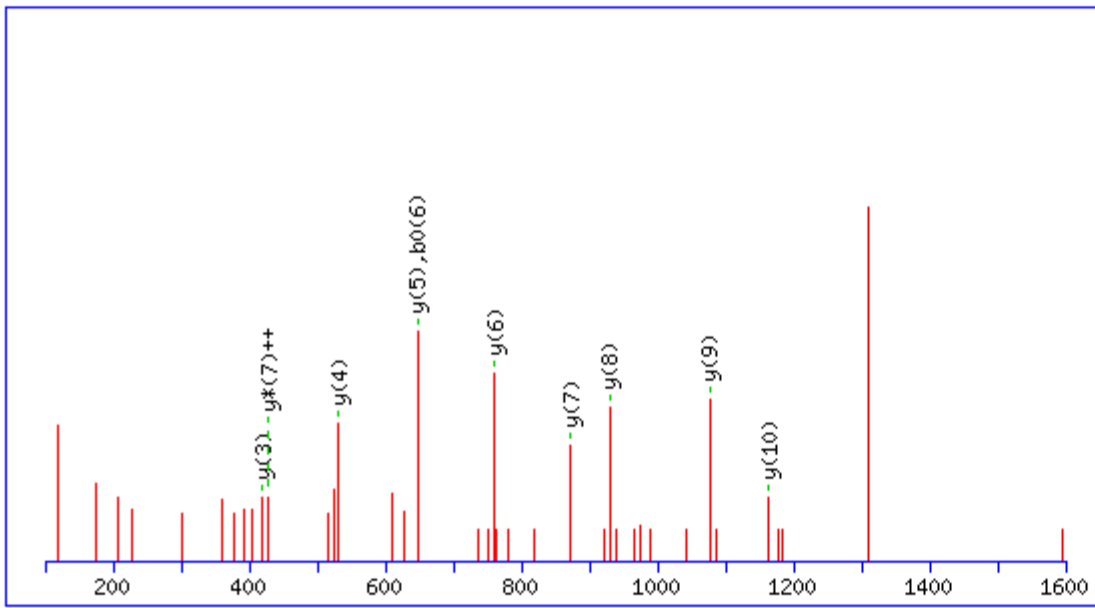

Monoisotopic mass of neutral peptide Mr(calc): 1310.702316

Fixed modifications: Propionamide (C) (apply to specified residues or termini only)

Ions Score: 76 Expect: 1.4e-007

Matches : 10/90 fragment ions using 11 most intense peaks ([help](#))

| #  | b           | b <sup>++</sup> | b <sup>0</sup>    | b <sup>0++</sup> | Seq. | y                  | y <sup>++</sup> | y <sup>*</sup> | y <sup>*++</sup>  | y <sup>0</sup> | y <sup>0++</sup> | #  |
|----|-------------|-----------------|-------------------|------------------|------|--------------------|-----------------|----------------|-------------------|----------------|------------------|----|
| 1  | 148.075690  | 74.541483       |                   |                  | F    |                    |                 |                |                   |                |                  | 11 |
| 2  | 235.107718  | 118.057497      | 217.097153        | 109.052214       | S    | <b>1164.641171</b> | 582.824224      | 1147.614622    | 574.310949        | 1146.630606    | 573.818941       | 10 |
| 3  | 382.176132  | 191.591704      | 364.165567        | 182.586422       | F    | <b>1077.609143</b> | 539.308210      | 1060.582594    | 530.794935        | 1059.598578    | 530.302927       | 9  |
| 4  | 439.197596  | 220.102436      | 421.187031        | 211.097153       | G    | <b>930.540729</b>  | 465.774003      | 913.514180     | 457.260728        | 912.530164     | 456.768720       | 8  |
| 5  | 552.281660  | 276.644468      | 534.271095        | 267.639186       | L    | <b>873.519265</b>  | 437.263271      | 856.492716     | <b>428.749996</b> | 855.508700     | 428.257988       | 7  |
| 6  | 665.365724  | 333.186500      | <b>647.355159</b> | 324.181218       | L    | <b>760.435201</b>  | 380.721239      | 743.408652     | 372.207964        | 742.424636     | 371.715956       | 6  |
| 7  | 780.392667  | 390.699972      | 762.382102        | 381.694689       | D    | <b>647.351137</b>  | 324.179207      | 630.324588     | 315.665932        | 629.340572     | 315.173924       | 5  |
| 8  | 893.476731  | 447.242004      | 875.466166        | 438.236721       | L    | <b>532.324194</b>  | 266.665735      | 515.297645     | 258.152461        |                |                  | 4  |
| 9  | 990.529495  | 495.768386      | 972.518930        | 486.763103       | P    | <b>419.240130</b>  | 210.123703      | 402.213581     | 201.610429        |                |                  | 3  |
| 10 | 1137.597909 | 569.302593      | 1119.587344       | 560.297310       | F    | 322.187366         | 161.597321      | 305.160817     | 153.084047        |                |                  | 2  |
| 11 |             |                 |                   |                  | R    | 175.118952         | 88.063114       | 158.092403     | 79.549839         |                |                  | 1  |

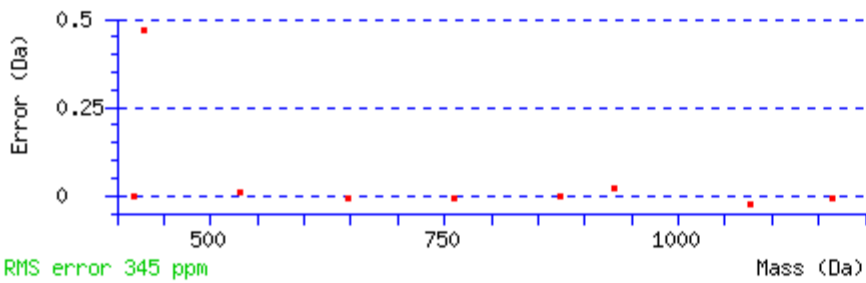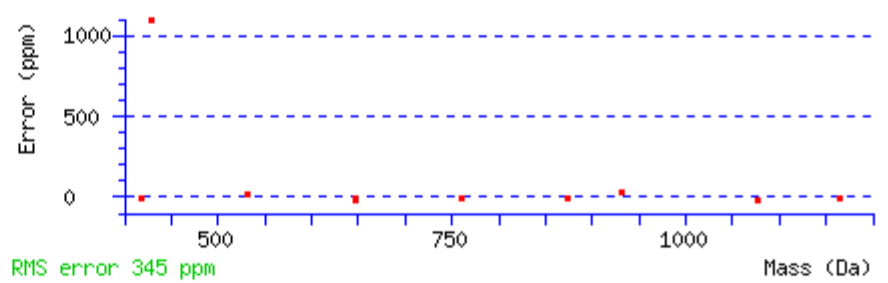

NCBI BLAST search of **FSFGLLDLPFR**

(Parameters: blastp, nr protein database, expect=20000, no filter, PAM30)

Other BLAST [web gateways](#)

**All matches to this query**

| Score | Mr(calc):   | Delta     | Sequence                     |
|-------|-------------|-----------|------------------------------|
| 75.6  | 1310.702316 | -0.000288 | <a href="#">FSFGLLDLPFR</a>  |
| 2.5   | 1310.709503 | -0.007475 | <a href="#">AYQLHSRPVPK</a>  |
| 0.9   | 1310.701630 | 0.000398  | <a href="#">MPPLIADSPKAR</a> |



# {MATRIX} SCIENCE Mascot Search Results

## Peptide View

MS/MS Fragmentation of **DQTIVDPFSSK**

Found in **SMC3\_HUMAN**, Structural maintenance of chromosomes protein 3 OS=Homo sapiens GN=SMC3 PE=1 SV=2

Match to Query 564143: 1235.600608 from(618.807580,2+) rtinseconds(2620) index(687579)

Title: Locus:1.1.1.1669.26

Data file C:\Program Files (x86)\Matrix Science\Mascot Daemon\mgf3 TFD - Epitel - R2\mascot\_daemon\_merge.mgf

Click mouse within plot area to zoom in by factor of two about that point

Or, Plot from  to  Da

Label all possible matches  Label matches used for scoring

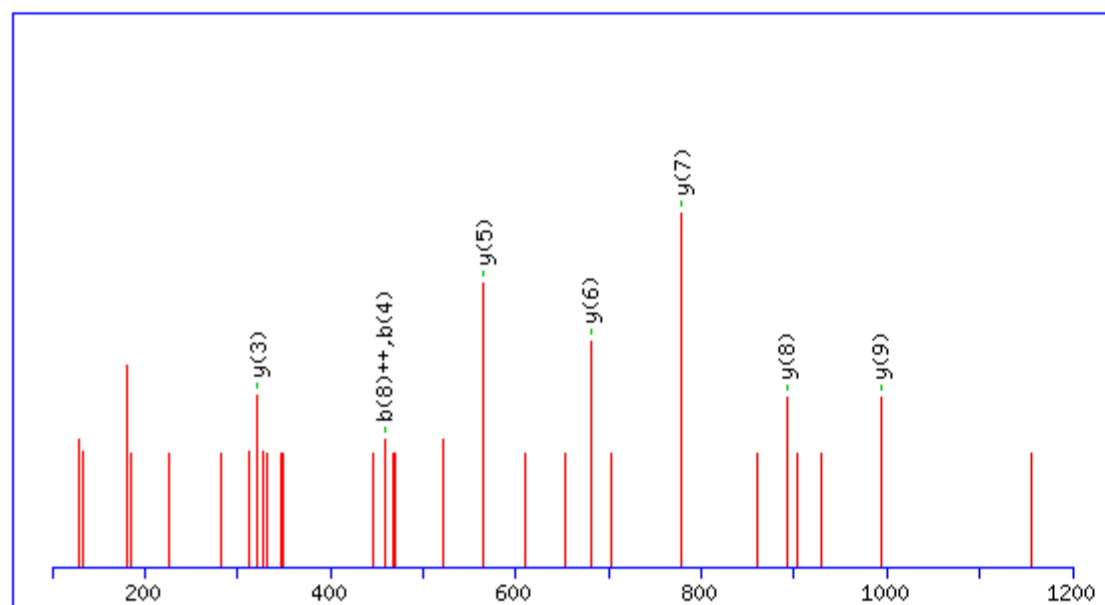

Monoisotopic mass of neutral peptide Mr(calc): 1235.603394

Fixed modifications: Carbamidomethyl (C) (apply to specified residues or termini only)

Ions Score: 42 Expect: 0.0009

Matches : 8/116 fragment ions using 10 most intense peaks ([help](#))

| #  | b                 | b <sup>++</sup>   | b <sup>*</sup> | b <sup>*++</sup> | b <sup>0</sup> | b <sup>0++</sup> | Seq. | y                 | y <sup>++</sup> | y <sup>*</sup> | y <sup>*++</sup> | y <sup>0</sup> | y <sup>0++</sup> | #  |
|----|-------------------|-------------------|----------------|------------------|----------------|------------------|------|-------------------|-----------------|----------------|------------------|----------------|------------------|----|
| 1  | 116.034219        | 58.520748         |                |                  | 98.023654      | 49.515465        | D    |                   |                 |                |                  |                |                  | 11 |
| 2  | 244.092797        | 122.550037        | 227.066248     | 114.036762       | 226.082232     | 113.544754       | Q    | 1121.583716       | 561.295496      | 1104.557167    | 552.782222       | 1103.573151    | 552.290214       | 10 |
| 3  | 345.140476        | 173.073876        | 328.113927     | 164.560602       | 327.129911     | 164.068594       | T    | <b>993.525138</b> | 497.266207      | 976.498589     | 488.752933       | 975.514573     | 488.260925       | 9  |
| 4  | <b>458.224540</b> | 229.615908        | 441.197991     | 221.102634       | 440.213975     | 220.610626       | I    | <b>892.477459</b> | 446.742368      | 875.450910     | 438.229093       | 874.466894     | 437.737085       | 8  |
| 5  | 557.292954        | 279.150115        | 540.266405     | 270.636841       | 539.282389     | 270.144833       | V    | <b>779.393395</b> | 390.200336      | 762.366846     | 381.687061       | 761.382830     | 381.195053       | 7  |
| 6  | 672.319897        | 336.663587        | 655.293348     | 328.150312       | 654.309332     | 327.658304       | D    | <b>680.324981</b> | 340.666129      | 663.298432     | 332.152854       | 662.314416     | 331.660846       | 6  |
| 7  | 769.372661        | 385.189969        | 752.346112     | 376.676694       | 751.362096     | 376.184686       | P    | <b>565.298038</b> | 283.152657      | 548.271489     | 274.639383       | 547.287473     | 274.147375       | 5  |
| 8  | 916.441075        | <b>458.724176</b> | 899.414526     | 450.210901       | 898.430510     | 449.718893       | F    | 468.245274        | 234.626275      | 451.218725     | 226.113001       | 450.234709     | 225.620993       | 4  |
| 9  | 1003.473103       | 502.240190        | 986.446554     | 493.726915       | 985.462538     | 493.234907       | S    | <b>321.176860</b> | 161.092068      | 304.150311     | 152.578794       | 303.166295     | 152.086786       | 3  |
| 10 | 1090.505131       | 545.756204        | 1073.478582    | 537.242929       | 1072.494566    | 536.750921       | S    | 234.144832        | 117.576054      | 217.118283     | 109.062780       | 216.134267     | 108.570772       | 2  |
| 11 |                   |                   |                |                  |                |                  | K    | 147.112804        | 74.060040       | 130.086255     | 65.546765        |                |                  | 1  |

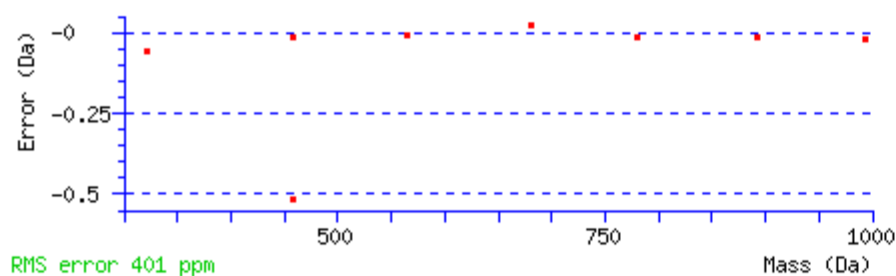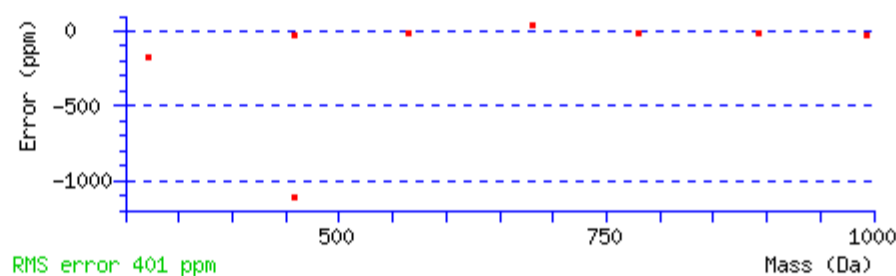

NCBI BLAST search of [DQTIVDPFSSK](#)

(Parameters: blastp, nr protein database, expect=20000, no filter, PAM30)

Other BLAST [web gateways](#)

All matches to this query

| Score | Mr(calc):   | Delta     | Sequence                    |
|-------|-------------|-----------|-----------------------------|
| 41.6  | 1235.603394 | -0.002786 | <a href="#">DQTIVDPFSSK</a> |

Mascot: <http://www.matrixscience.com/>

# **MASCOT** Mascot Search Results

## Peptide View

MS/MS Fragmentation of **SSLAPGVWFFR**

Found in **SPX2\_HUMAN**, Sugar phosphate exchanger 2 OS=Homo sapiens GN=SLC37A2 PE=2 SV=2

Match to Query 33792: 1281.640632 from(428.220820,3+) rtinseconds(1721) index(16716)

Title: Locus:1.1.1.2086.7

Data file 2011-11-10 - TFD - EP 3-1.mgf

Click mouse within plot area to zoom in by factor of two about that point

Or, Plot from  to  Da

Label all possible matches  Label matches used for scoring

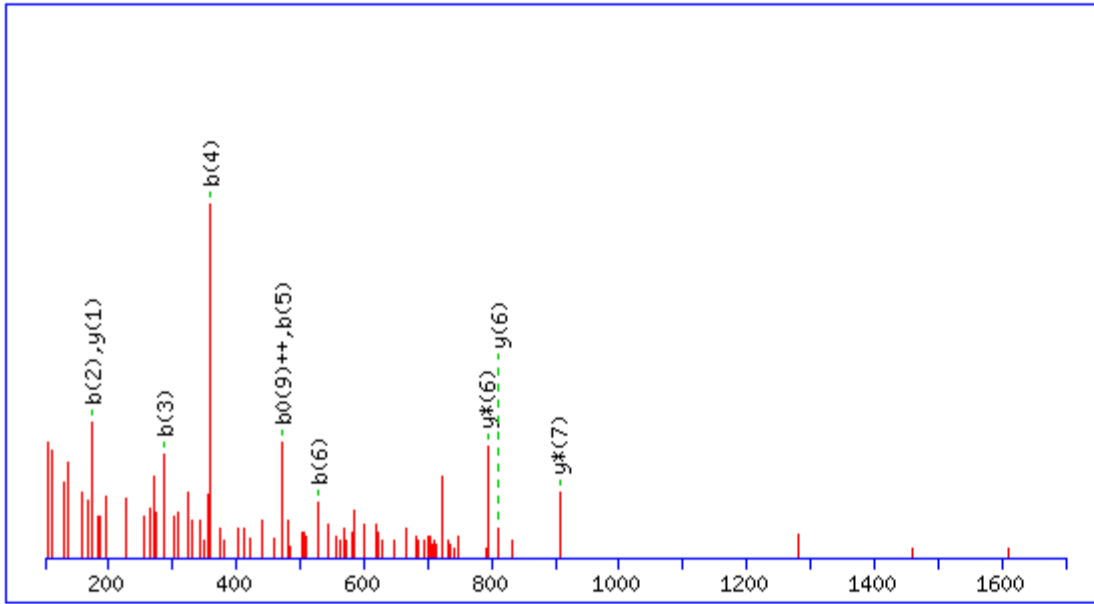

Monoisotopic mass of neutral peptide Mr(calc): 1281.650620

Fixed modifications: Propionamide (C) (apply to specified residues or termini only)

Variable modifications:

P5 : Oxidation (P)

Ions Score: 41 Expect: 0.00086

Matches : 10/82 fragment ions using 9 most intense peaks [\(help\)](#)

| #  | b                 | b <sup>++</sup> | b <sup>0</sup> | b <sup>0++</sup>  | Seq. | y                 | y <sup>++</sup> | y <sup>*</sup>    | y <sup>*++</sup> | y <sup>0</sup> | y <sup>0++</sup> | #  |
|----|-------------------|-----------------|----------------|-------------------|------|-------------------|-----------------|-------------------|------------------|----------------|------------------|----|
| 1  | 88.039304         | 44.523290       | 70.028739      | 35.518008         | S    |                   |                 |                   |                  |                |                  | 11 |
| 2  | <b>175.071332</b> | 88.039304       | 157.060767     | 79.034021         | S    | 1195.625856       | 598.316566      | 1178.599307       | 589.803292       | 1177.615291    | 589.311283       | 10 |
| 3  | <b>288.155396</b> | 144.581336      | 270.144831     | 135.576054        | L    | 1108.593828       | 554.800552      | 1091.567279       | 546.287278       |                |                  | 9  |
| 4  | <b>359.192510</b> | 180.099893      | 341.181945     | 171.094611        | A    | 995.509764        | 498.258520      | 978.483215        | 489.745245       |                |                  | 8  |
| 5  | <b>472.240189</b> | 236.623733      | 454.229624     | 227.618450        | P    | 924.472650        | 462.739963      | <b>907.446101</b> | 454.226688       |                |                  | 7  |
| 6  | <b>529.261653</b> | 265.134465      | 511.251088     | 256.129182        | G    | <b>811.424971</b> | 406.216123      | <b>794.398422</b> | 397.702849       |                |                  | 6  |
| 7  | 628.330067        | 314.668672      | 610.319502     | 305.663389        | V    | 754.403507        | 377.705391      | 737.376958        | 369.192117       |                |                  | 5  |
| 8  | 814.409380        | 407.708328      | 796.398815     | 398.703046        | W    | 655.335093        | 328.171184      | 638.308544        | 319.657910       |                |                  | 4  |
| 9  | 961.477794        | 481.242535      | 943.467229     | <b>472.237253</b> | F    | 469.255780        | 235.131528      | 452.229231        | 226.618253       |                |                  | 3  |
| 10 | 1108.546208       | 554.776742      | 1090.535643    | 545.771459        | F    | 322.187366        | 161.597321      | 305.160817        | 153.084046       |                |                  | 2  |
| 11 |                   |                 |                |                   | R    | <b>175.118952</b> | 88.063114       | 158.092403        | 79.549839        |                |                  | 1  |

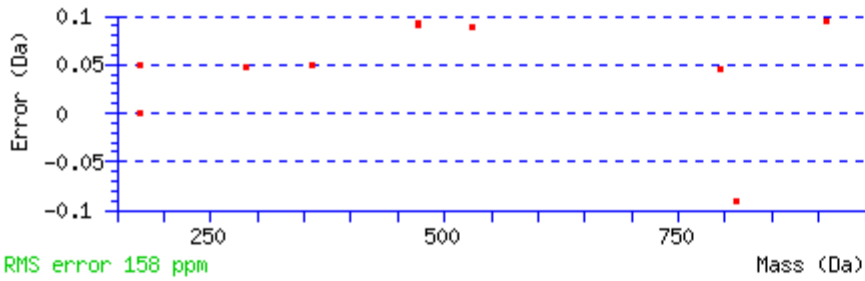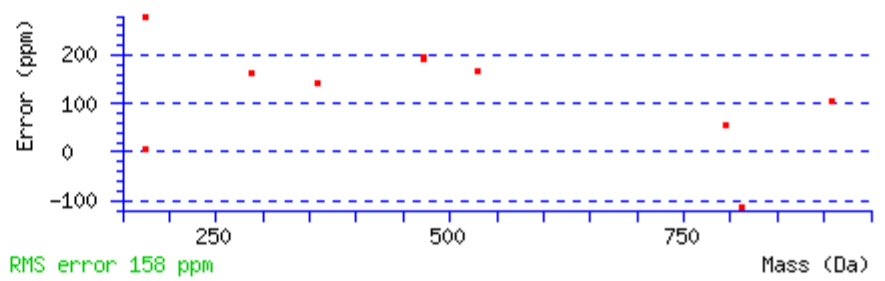

NCBI BLAST search of [SSLAPGVWFFR](#)

(Parameters: blastp, nr protein database, expect=20000, no filter, PAM30)

Other BLAST [web gateways](#)

## All matches to this query

| Score | Mr(calc):   | Delta     | Sequence                      |
|-------|-------------|-----------|-------------------------------|
| 40.7  | 1281.650620 | -0.009988 | <a href="#">SSLAPGVWFFR</a>   |
| 24.9  | 1281.638672 | 0.001960  | <a href="#">MKYENELALR</a>    |
| 6.9   | 1281.649933 | -0.009301 | <a href="#">AQLPSAQMPAPR</a>  |
| 6.9   | 1281.631317 | 0.009315  | <a href="#">DSQLHLDDALR</a>   |
| 6.9   | 1281.649918 | -0.009286 | <a href="#">MQYIERSALR</a>    |
| 5.3   | 1281.649933 | -0.009301 | <a href="#">KFMAASVASTNR</a>  |
| 4.9   | 1281.646591 | -0.005959 | <a href="#">WHQVETPLR</a>     |
| 4.1   | 1281.647446 | -0.006814 | <a href="#">MMLIPTHHFR</a>    |
| 3.8   | 1281.631332 | 0.009300  | <a href="#">SVDIHDSIQPR</a>   |
| 3.6   | 1281.631332 | 0.009300  | <a href="#">AGSPAAGPPLQPR</a> |

# MASCOT Search Results

## Peptide View

### MS/MS Fragmentation of YLLGLNLPR

Found in **S26A2\_HUMAN**, Sulfate transporter OS=Homo sapiens GN=SLC26A2 PE=1 SV=2

Match to Query 12394: 1057.632448 from(529.823500,2+) rtinseconds(3157) index(44463)

Title: Locus:1.1.1.1579.4

Data file 2012-01-27 - TFD - Epitel - IEC - 10ul - 2.mgf

Click mouse within plot area to zoom in by factor of two about that point

Or, Plot from  to  Da

Label all possible matches  Label matches used for scoring

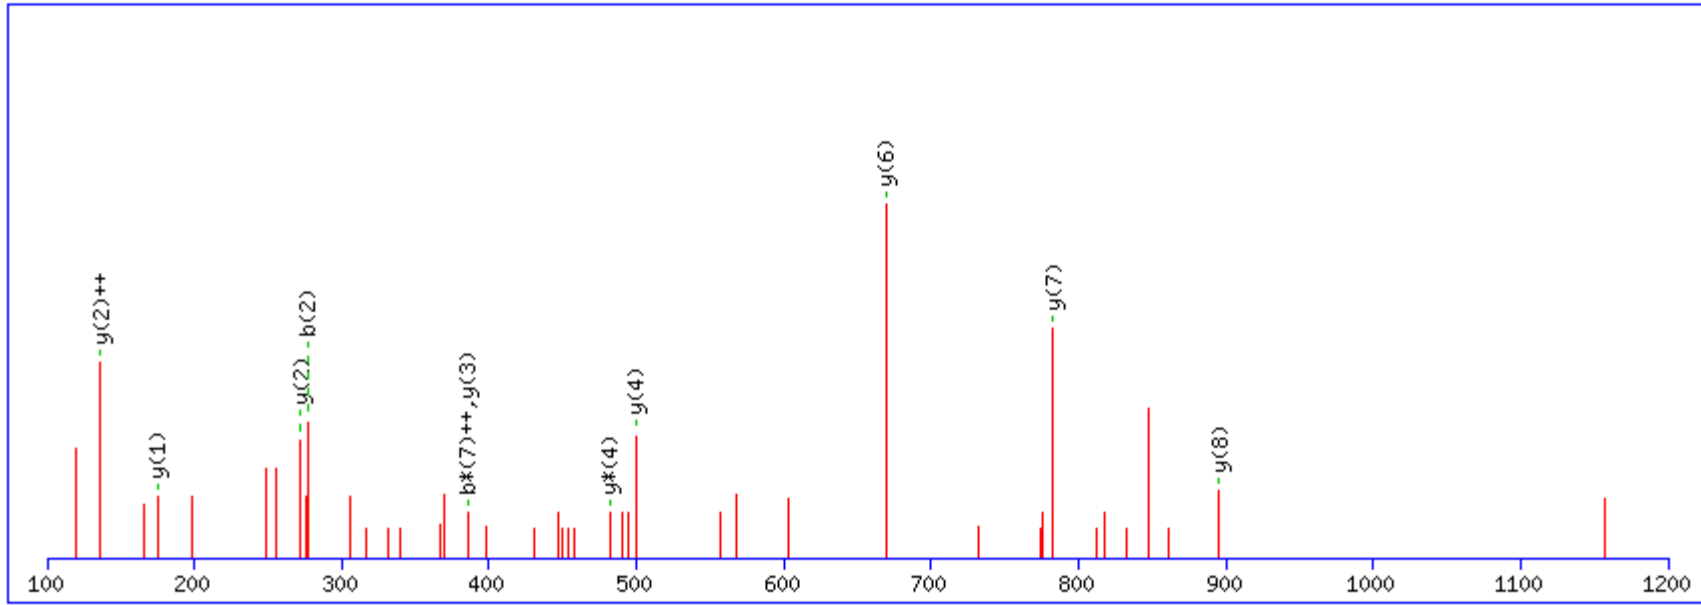

Monoisotopic mass of neutral peptide Mr(calc): 1057.628387

Fixed modifications: Carbamidomethyl (C) (apply to specified residues or termini only)

Ions Score: 38 Expect: 0.00068

Matches : 11/54 fragment ions using 22 most intense peaks [\(help\)](#)

| # | b          | b <sup>++</sup> | b <sup>*</sup> | b <sup>*++</sup> | Seq. | y          | y <sup>++</sup> | y <sup>*</sup> | y <sup>*++</sup> | # |
|---|------------|-----------------|----------------|------------------|------|------------|-----------------|----------------|------------------|---|
| 1 | 164.070605 | 82.538940       |                |                  | Y    |            |                 |                |                  | 9 |
| 2 | 277.154669 | 139.080973      |                |                  | L    | 895.572363 | 448.289820      | 878.545814     | 439.776545       | 8 |
| 3 | 390.238733 | 195.623005      |                |                  | L    | 782.488299 | 391.747788      | 765.461750     | 383.234513       | 7 |
| 4 | 447.260197 | 224.133737      |                |                  | G    | 669.404235 | 335.205756      | 652.377686     | 326.692481       | 6 |
| 5 | 560.344261 | 280.675769      |                |                  | L    | 612.382771 | 306.695024      | 595.356222     | 298.181749       | 5 |
| 6 | 674.387188 | 337.697232      | 657.360639     | 329.183958       | N    | 499.298707 | 250.152991      | 482.272158     | 241.639717       | 4 |
| 7 | 787.471252 | 394.239264      | 770.444703     | 385.725990       | L    | 385.255780 | 193.131528      | 368.229231     | 184.618253       | 3 |
| 8 | 884.524016 | 442.765646      | 867.497467     | 434.252372       | P    | 272.171716 | 136.589496      | 255.145167     | 128.076221       | 2 |
| 9 |            |                 |                |                  | R    | 175.118952 | 88.063114       | 158.092403     | 79.549839        | 1 |

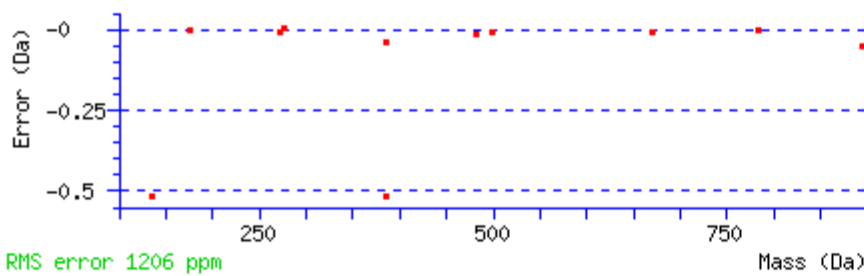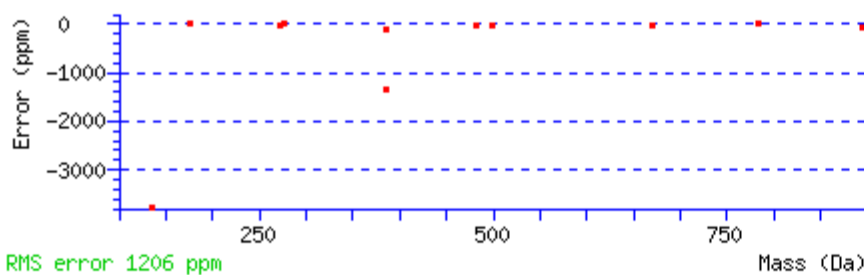

### NCBI BLAST search of YLLGLNLPR

(Parameters: blastp, nr protein database, expect=20000, no filter, PAM30)

Other BLAST [web gateways](#)

### All matches to this query

| Score | Mr(calc):   | Delta    | Sequence                  |
|-------|-------------|----------|---------------------------|
| 38.5  | 1057.628387 | 0.004061 | <a href="#">YLLGLNLPR</a> |

# MASCOT Search Results

## Peptide View

MS/MS Fragmentation of **LVQSTLSDLR**

Found in **SRXN1\_HUMAN**, Sulfiredoxin-1 OS=Homo sapiens GN=SRXN1 PE=1 SV=2

Match to Query 22786: 1130.631428 from(566.322990,2+) rtinseconds(2119) index(19262)

Title: Locus:1.1.1.2214.27

Data file 2011-11-10 - TFD - EP 3-7.mgf

Click mouse within plot area to zoom in by factor of two about that point

Or, Plot from  to  Da

Label all possible matches  Label matches used for scoring

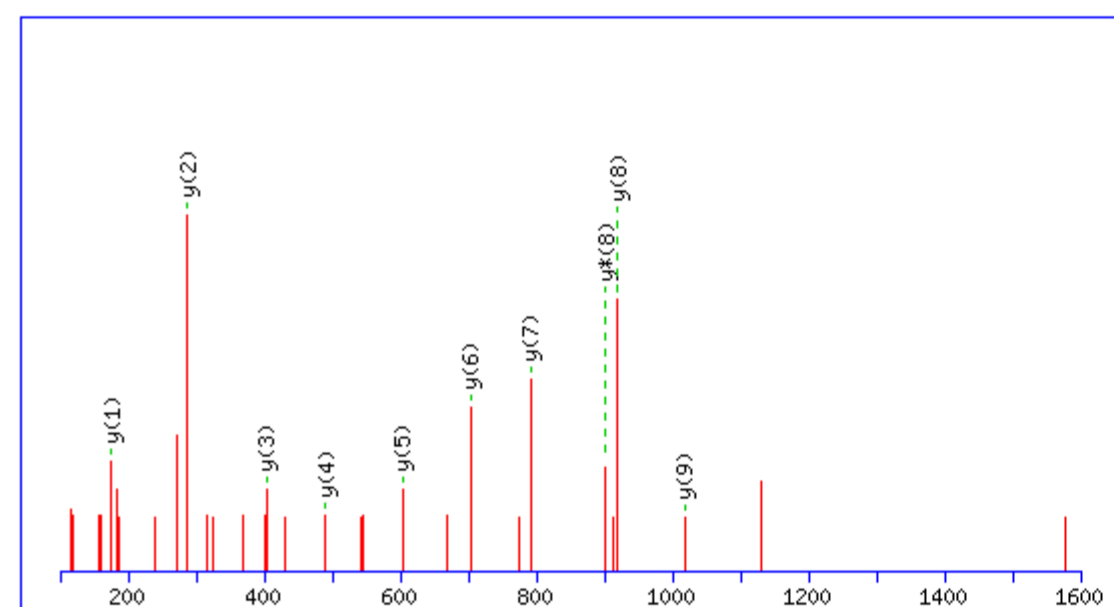

Monoisotopic mass of neutral peptide Mr(calc): 1130.629532

Fixed modifications: Propionamide (C) (apply to specified residues or termini only)

Ions Score: 105 Expect: 2e-010

Matches : 10/94 fragment ions using 10 most intense peaks [\(help\)](#)

| #  | b          | b <sup>++</sup> | b <sup>*</sup> | b <sup>*++</sup> | b <sup>0</sup> | b <sup>0++</sup> | Seq. | y                  | y <sup>++</sup> | y <sup>*</sup>    | y <sup>*++</sup> | y <sup>0</sup> | y <sup>0++</sup> | #  |
|----|------------|-----------------|----------------|------------------|----------------|------------------|------|--------------------|-----------------|-------------------|------------------|----------------|------------------|----|
| 1  | 114.091340 | 57.549308       |                |                  |                |                  | L    |                    |                 |                   |                  |                |                  | 10 |
| 2  | 213.159754 | 107.083515      |                |                  |                |                  | V    | <b>1018.552750</b> | 509.780013      | 1001.526201       | 501.266738       | 1000.542185    | 500.774730       | 9  |
| 3  | 341.218332 | 171.112804      | 324.191783     | 162.599529       |                |                  | Q    | <b>919.484336</b>  | 460.245806      | <b>902.457787</b> | 451.732531       | 901.473771     | 451.240523       | 8  |
| 4  | 428.250360 | 214.628818      | 411.223811     | 206.115543       | 410.239795     | 205.623535       | S    | <b>791.425758</b>  | 396.216517      | 774.399209        | 387.703242       | 773.415193     | 387.211234       | 7  |
| 5  | 529.298039 | 265.152658      | 512.271490     | 256.639383       | 511.287474     | 256.147375       | T    | <b>704.393730</b>  | 352.700503      | 687.367181        | 344.187229       | 686.383165     | 343.695221       | 6  |
| 6  | 642.382103 | 321.694690      | 625.355554     | 313.181415       | 624.371538     | 312.689407       | L    | <b>603.346051</b>  | 302.176664      | 586.319502        | 293.663389       | 585.335486     | 293.171381       | 5  |
| 7  | 729.414131 | 365.210704      | 712.387582     | 356.697429       | 711.403566     | 356.205421       | S    | <b>490.261987</b>  | 245.634631      | 473.235438        | 237.121357       | 472.251422     | 236.629349       | 4  |
| 8  | 844.441074 | 422.724175      | 827.414525     | 414.210900       | 826.430509     | 413.718892       | D    | <b>403.229959</b>  | 202.118617      | 386.203410        | 193.605343       | 385.219394     | 193.113335       | 3  |
| 9  | 957.525138 | 479.266207      | 940.498589     | 470.752932       | 939.514573     | 470.260924       | L    | <b>288.203016</b>  | 144.605146      | 271.176467        | 136.091871       |                |                  | 2  |
| 10 |            |                 |                |                  |                |                  | R    | <b>175.118952</b>  | 88.063114       | 158.092403        | 79.549839        |                |                  | 1  |

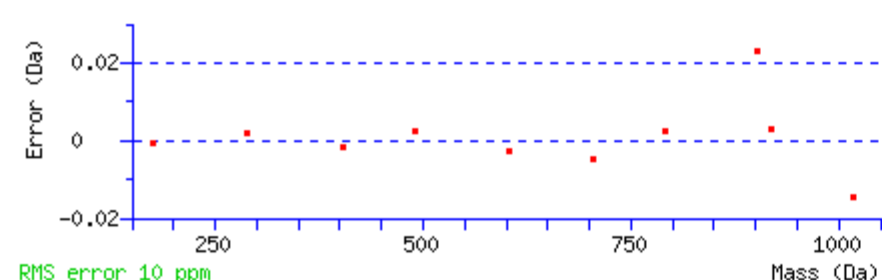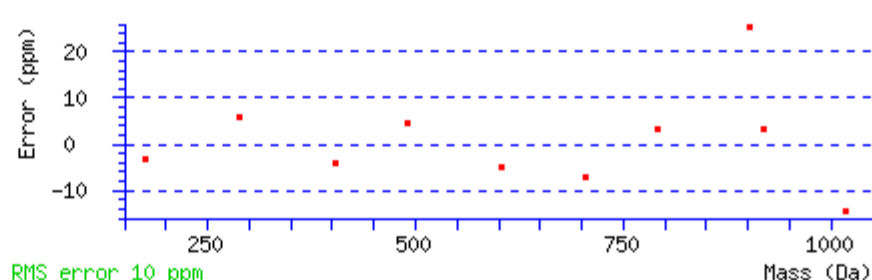

NCBI BLAST search of **LVQSTLSDLR**

(Parameters: blastp, nr protein database, expect=20000, no filter, PAM30)

Other BLAST [web gateways](#)

All matches to this query

| Score | Mr(calc):   | Delta     | Sequence                   |
|-------|-------------|-----------|----------------------------|
| 105.0 | 1130.629532 | 0.001896  | <a href="#">LVQSTLSDLR</a> |
| 28.9  | 1130.640762 | -0.009334 | <a href="#">RAPSTLTLR</a>  |
| 15.5  | 1130.623642 | 0.007786  | <a href="#">LAAFPWAALR</a> |
| 9.1   | 1130.622986 | 0.008442  | <a href="#">LTRGLCIER</a>  |
| 8.8   | 1130.629517 | 0.001911  | <a href="#">LSNDITSILR</a> |
| 8.7   | 1130.629532 | 0.001896  | <a href="#">LVQTQGTKEK</a> |
| 8.6   | 1130.622971 | 0.008457  | <a href="#">LREINSMIR</a>  |
| 8.1   | 1130.622986 | 0.008442  | <a href="#">LVEALRQMR</a>  |
| 8.1   | 1130.629517 | 0.001911  | <a href="#">LVETSLKGER</a> |
| 7.2   | 1130.630371 | 0.001057  | <a href="#">LQNIMMLLR</a>  |

# **MATRIX** SCIENCE Mascot Search Results

## Peptide View

### MS/MS Fragmentation of **VPFLEFK**

Found in **ST1A1\_HUMAN**, Sulfotransferase 1A1 OS=Homo sapiens GN=SULT1A1 PE=1 SV=3

Match to Query 5545: 878.496788 from(440.255670,2+) rtinseconds(3004) index(36614)

Title: Locus:1.1.1.2762.4

Data file 2011-11-10 - TFD - EP 3-5.mgf

Click mouse within plot area to zoom in by factor of two about that point

Or, Plot from  to  Da

Label all possible matches  Label matches used for scoring

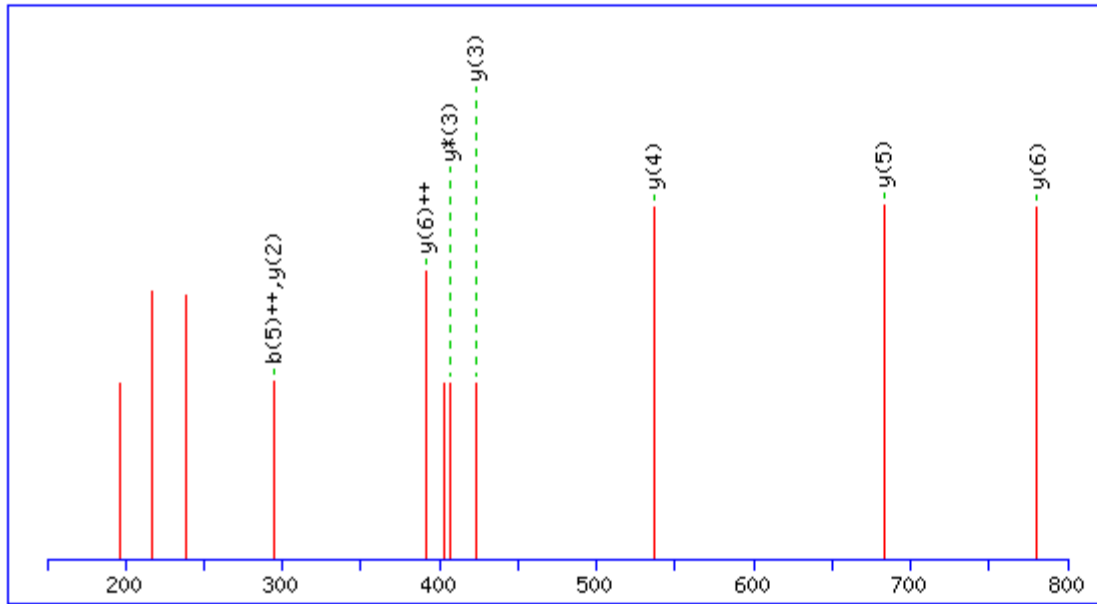

Monoisotopic mass of neutral peptide Mr(calc): 878.490189

Fixed modifications: Propionamide (C) (apply to specified residues or termini only)

Ions Score: 39 Expect: 0.00041

Matches : 8/48 fragment ions using 10 most intense peaks [\(help\)](#)

| # | b          | b <sup>++</sup> | b <sup>0</sup> | b <sup>0++</sup> | Seq. | y          | y <sup>++</sup> | y <sup>*</sup> | y <sup>*++</sup> | y <sup>0</sup> | y <sup>0++</sup> | # |
|---|------------|-----------------|----------------|------------------|------|------------|-----------------|----------------|------------------|----------------|------------------|---|
| 1 | 100.075690 | 50.541483       |                |                  | V    |            |                 |                |                  |                |                  | 7 |
| 2 | 197.128454 | 99.067865       |                |                  | P    | 780.429053 | 390.718165      | 763.402504     | 382.204890       | 762.418488     | 381.712882       | 6 |
| 3 | 344.196868 | 172.602072      |                |                  | F    | 683.376289 | 342.191783      | 666.349740     | 333.678508       | 665.365724     | 333.186500       | 5 |
| 4 | 457.280932 | 229.144104      |                |                  | L    | 536.307875 | 268.657576      | 519.281326     | 260.144301       | 518.297310     | 259.652293       | 4 |
| 5 | 586.323525 | 293.665401      | 568.312960     | 284.660118       | E    | 423.223811 | 212.115543      | 406.197262     | 203.602269       | 405.213246     | 203.110261       | 3 |
| 6 | 733.391939 | 367.199608      | 715.381374     | 358.194325       | F    | 294.181218 | 147.594247      | 277.154669     | 139.080972       |                |                  | 2 |
| 7 |            |                 |                |                  | K    | 147.112804 | 74.060040       | 130.086255     | 65.546765        |                |                  | 1 |

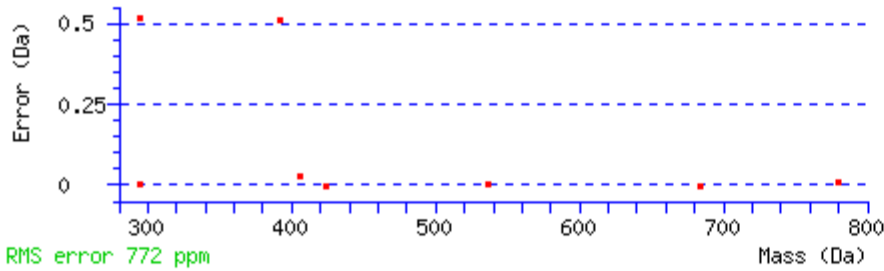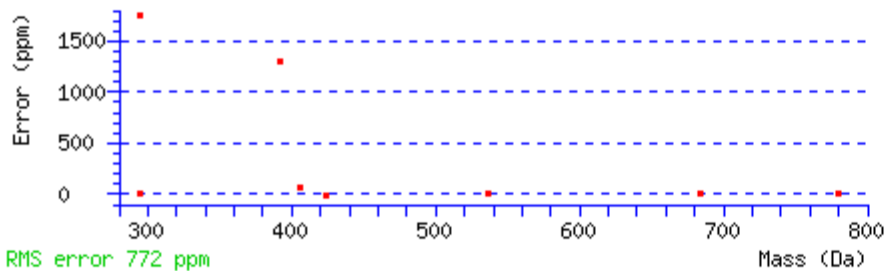

### NCBI BLAST search of **VPFLEFK**

(Parameters: blastp, nr protein database, expect=20000, no filter, PAM30)

Other BLAST [web gateways](#)

### All matches to this query

| Score | Mr(calc):  | Delta     | Sequence                  |
|-------|------------|-----------|---------------------------|
| 39.1  | 878.490189 | 0.006599  | <a href="#">VPFLEFK</a>   |
| 3.1   | 878.497391 | -0.000603 | <a href="#">VPAATPAPR</a> |

# Mascot Search Results

## Peptide View

MS/MS Fragmentation of **EYPFILDAFQR**

Found in **SK2L2\_HUMAN**, Superkiller viralicidic activity 2-like 2 OS=Homo sapiens GN=SKIV2L2 PE=1 SV=3

Match to Query 41529: 1397.700828 from(699.857690,2+) rtinseconds(3881) index(56773)

Title: Locus:1.1.1.2809.31

Data file 2011-11-10 - TFD - EP 4-1.mgf

Click mouse within plot area to zoom in by factor of two about that point

Or, Plot from  to  Da

Label all possible matches  Label matches used for scoring

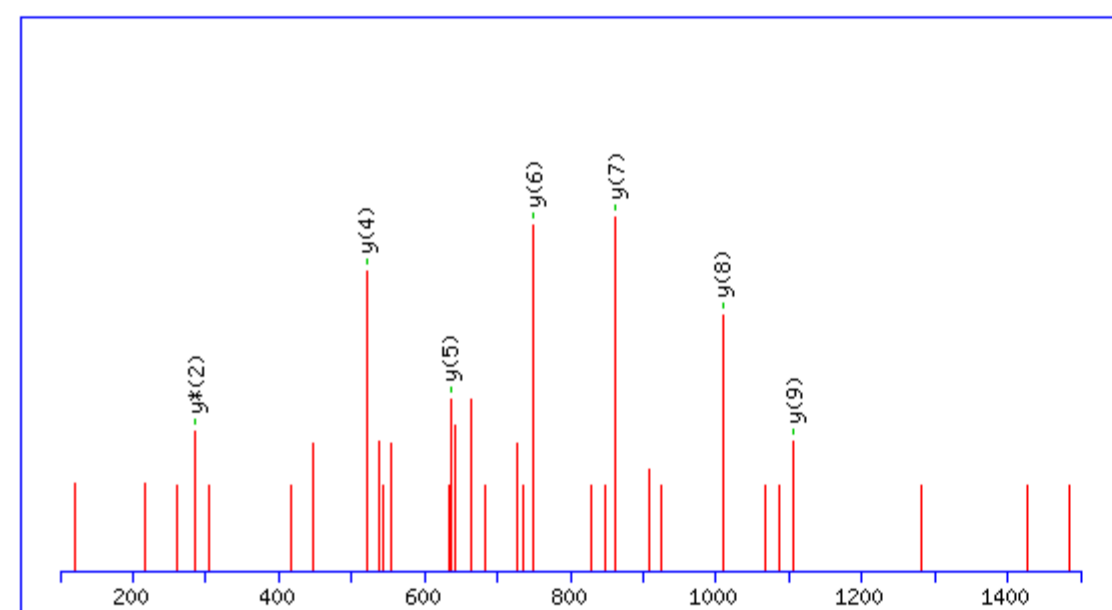

Monoisotopic mass of neutral peptide Mr(calc): 1397.697937

Fixed modifications: Propionamide (C) (apply to specified residues or termini only)

Ions Score: 42 Expect: 0.00055

Matches : 7/94 fragment ions using 11 most intense peaks [\(help\)](#)

| #  | b           | b <sup>++</sup> | b <sup>*</sup> | b <sup>*++</sup> | b <sup>0</sup> | b <sup>0++</sup> | Seq. | y                  | y <sup>++</sup> | y <sup>*</sup>    | y <sup>*++</sup> | y <sup>0</sup> | y <sup>0++</sup> | #  |
|----|-------------|-----------------|----------------|------------------|----------------|------------------|------|--------------------|-----------------|-------------------|------------------|----------------|------------------|----|
| 1  | 130.049869  | 65.528572       |                |                  | 112.039304     | 56.523290        | E    |                    |                 |                   |                  |                |                  | 11 |
| 2  | 293.113198  | 147.060237      |                |                  | 275.102633     | 138.054955       | Y    | 1269.662636        | 635.334956      | 1252.636087       | 626.821681       | 1251.652071    | 626.329673       | 10 |
| 3  | 390.165962  | 195.586619      |                |                  | 372.155397     | 186.581336       | P    | <b>1106.599307</b> | 553.803292      | 1089.572758       | 545.290017       | 1088.588742    | 544.798009       | 9  |
| 4  | 537.234376  | 269.120826      |                |                  | 519.223811     | 260.115544       | F    | <b>1009.546543</b> | 505.276909      | 992.519994        | 496.763635       | 991.535978     | 496.271627       | 8  |
| 5  | 650.318440  | 325.662858      |                |                  | 632.307875     | 316.657576       | I    | <b>862.478129</b>  | 431.742703      | 845.451580        | 423.229428       | 844.467564     | 422.737420       | 7  |
| 6  | 763.402504  | 382.204890      |                |                  | 745.391939     | 373.199608       | L    | <b>749.394065</b>  | 375.200671      | 732.367516        | 366.687396       | 731.383500     | 366.195388       | 6  |
| 7  | 878.429447  | 439.718362      |                |                  | 860.418882     | 430.713079       | D    | <b>636.310001</b>  | 318.658639      | 619.283452        | 310.145364       | 618.299436     | 309.653356       | 5  |
| 8  | 949.466561  | 475.236919      |                |                  | 931.455996     | 466.231636       | A    | <b>521.283058</b>  | 261.145167      | 504.256509        | 252.631892       |                |                  | 4  |
| 9  | 1096.534975 | 548.771126      |                |                  | 1078.524410    | 539.765843       | F    | 450.245944         | 225.626610      | 433.219395        | 217.113335       |                |                  | 3  |
| 10 | 1224.593553 | 612.800414      | 1207.567004    | 604.287140       | 1206.582988    | 603.795132       | Q    | 303.177530         | 152.092403      | <b>286.150981</b> | 143.579128       |                |                  | 2  |
| 11 |             |                 |                |                  |                |                  | R    | 175.118952         | 88.063114       | 158.092403        | 79.549839        |                |                  | 1  |

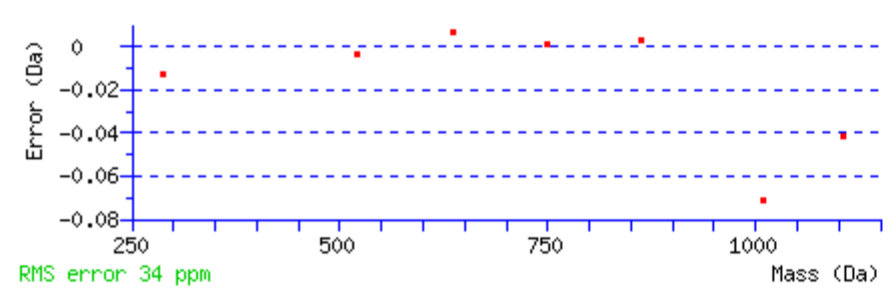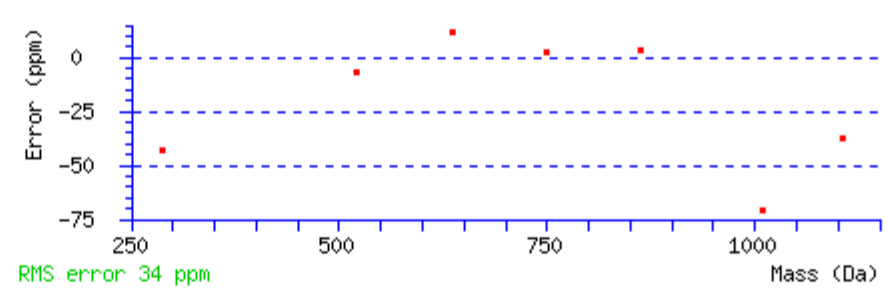

NCBI BLAST search of [EYPFILDAFQR](#)

(Parameters: blastp, nr protein database, expect=20000, no filter, PAM30)

Other BLAST [web gateways](#)

### All matches to this query

| Score | Mr(calc):   | Delta     | Sequence                       |
|-------|-------------|-----------|--------------------------------|
| 41.8  | 1397.697937 | 0.002891  | <a href="#">EYPFILDAFQR</a>    |
| 6.8   | 1397.707825 | -0.006997 | <a href="#">VEEYITPEKFK</a>    |
| 2.6   | 1397.693939 | 0.006889  | <a href="#">AGSPPPPPPPPPAR</a> |
| 0.7   | 1397.693939 | 0.006889  | <a href="#">AGSPPPPPPPPPAR</a> |

# Mascot Search Results

## Peptide View

MS/MS Fragmentation of **NYAAALETFTGQK**

Found in **SUGT1\_HUMAN**, Suppressor of G2 allele of SKP1 homolog OS=Homo sapiens GN=SUGT1 PE=1 SV=3

Match to Query 48696: 1541.723268 from(771.868910,2+) rtinseconds(2971) index(40377)

Title: Locus:1.1.1.2545.41

Data file 2011-11-12 - TFD - EP 5-4.mgf

Click mouse within plot area to zoom in by factor of two about that point

Or, Plot from  to  Da

Label all possible matches  Label matches used for scoring

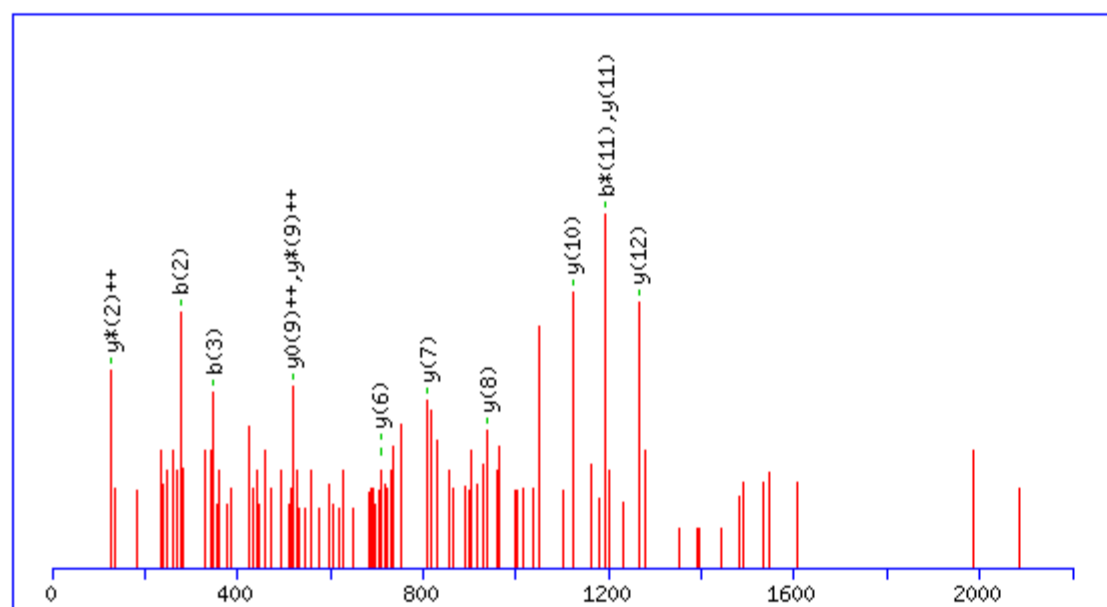

Monoisotopic mass of neutral peptide Mr(calc): 1541.736160

Fixed modifications: Propionamide (C) (apply to specified residues or termini only)

Ions Score: 37 Expect: 0.00043

Matches : 12/138 fragment ions using 15 most intense peaks [\(help\)](#)

| #  | b                 | b <sup>++</sup> | b <sup>*</sup>     | b <sup>*++</sup> | b <sup>0</sup> | b <sup>0++</sup> | Seq. | y                  | y <sup>++</sup> | y <sup>*</sup> | y <sup>*++</sup>  | y <sup>0</sup> | y <sup>0++</sup>  | #  |
|----|-------------------|-----------------|--------------------|------------------|----------------|------------------|------|--------------------|-----------------|----------------|-------------------|----------------|-------------------|----|
| 1  | 115.050203        | 58.028740       | 98.023654          | 49.515465        |                |                  | N    |                    |                 |                |                   |                |                   | 14 |
| 2  | <b>278.113532</b> | 139.560404      | 261.086983         | 131.047130       |                |                  | Y    | 1428.700539        | 714.853908      | 1411.673990    | 706.340633        | 1410.689974    | 705.848625        | 13 |
| 3  | <b>349.150646</b> | 175.078961      | 332.124097         | 166.565687       |                |                  | A    | <b>1265.637210</b> | 633.322243      | 1248.610661    | 624.808969        | 1247.626645    | 624.316961        | 12 |
| 4  | 420.187760        | 210.597518      | 403.161211         | 202.084243       |                |                  | A    | <b>1194.600096</b> | 597.803686      | 1177.573547    | 589.290412        | 1176.589531    | 588.798404        | 11 |
| 5  | 491.224874        | 246.116075      | 474.198325         | 237.602800       |                |                  | A    | <b>1123.562982</b> | 562.285129      | 1106.536433    | 553.771855        | 1105.552417    | 553.279847        | 10 |
| 6  | 604.308938        | 302.658107      | 587.282389         | 294.144833       |                |                  | L    | 1052.525868        | 526.766572      | 1035.499319    | <b>518.253298</b> | 1034.515303    | <b>517.761290</b> | 9  |
| 7  | 733.351531        | 367.179404      | 716.324982         | 358.666129       | 715.340966     | 358.174121       | E    | <b>939.441804</b>  | 470.224540      | 922.415255     | 461.711266        | 921.431239     | 461.219258        | 8  |
| 8  | 834.399210        | 417.703243      | 817.372661         | 409.189969       | 816.388645     | 408.697961       | T    | <b>810.399211</b>  | 405.703244      | 793.372662     | 397.189969        | 792.388646     | 396.697961        | 7  |
| 9  | 981.467624        | 491.237450      | 964.441075         | 482.724176       | 963.457059     | 482.232168       | F    | <b>709.351532</b>  | 355.179404      | 692.324983     | 346.666130        | 691.340967     | 346.174122        | 6  |
| 10 | 1082.515303       | 541.761289      | 1065.488754        | 533.248015       | 1064.504738    | 532.756007       | T    | 562.283118         | 281.645197      | 545.256569     | 273.131923        | 544.272553     | 272.639915        | 5  |
| 11 | 1211.557896       | 606.282586      | <b>1194.531347</b> | 597.769312       | 1193.547331    | 597.277304       | E    | 461.235439         | 231.121358      | 444.208890     | 222.608083        | 443.224874     | 222.116075        | 4  |
| 12 | 1268.579360       | 634.793318      | 1251.552811        | 626.280044       | 1250.568795    | 625.788035       | G    | 332.192846         | 166.600061      | 315.166297     | 158.086787        |                |                   | 3  |
| 13 | 1396.637938       | 698.822607      | 1379.611389        | 690.309333       | 1378.627373    | 689.817325       | Q    | 275.171382         | 138.089329      | 258.144833     | <b>129.576055</b> |                |                   | 2  |
| 14 |                   |                 |                    |                  |                |                  | K    | 147.112804         | 74.060040       | 130.086255     | 65.546765         |                |                   | 1  |

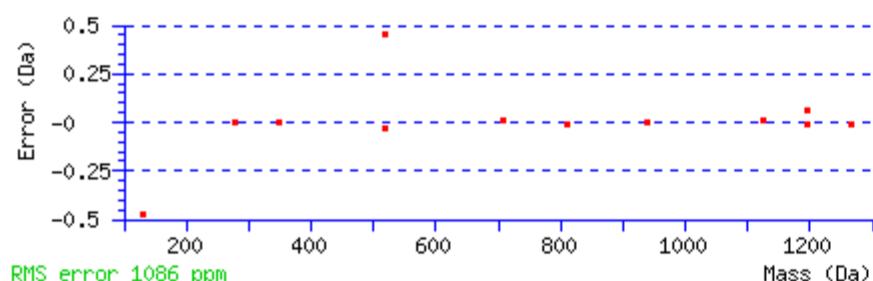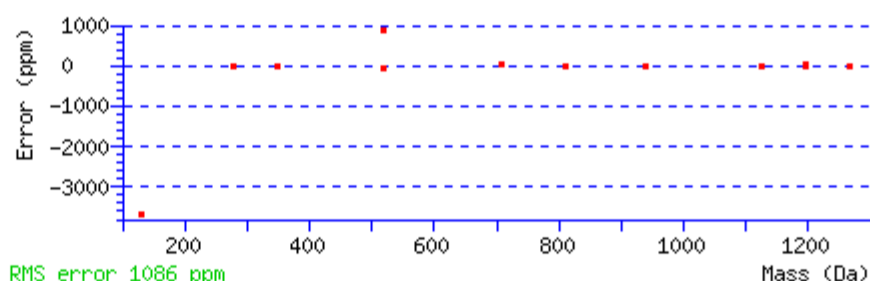

NCBI BLAST search of **NYAAALETFTGQK**

(Parameters: blastp, nr protein database, expect=20000, no filter, PAM30)

Other BLAST [web gateways](#)

All matches to this query

| Score | Mr(calc):   | Delta     | Sequence                      |
|-------|-------------|-----------|-------------------------------|
| 37.2  | 1541.736160 | -0.012892 | <a href="#">NYAAALETFTGQK</a> |

Mascot: <http://www.matrixscience.com/>

# MASCOT Search Results

## Peptide View

MS/MS Fragmentation of **QELEQALGIR**

Found in **SMRD1\_HUMAN**, SWI/SNF-related matrix-associated actin-dependent regulator of chromatin subfamily D member 1 OS=Homo sapiens GN=SMARCD1 PE=1 SV=2

Match to Query 23390: 1155.618108 from(578.816330,2+) rtinseconds(1666) index(11476)  
 Title: Locus:1.1.1.2257.40  
 Data file 2011-11-10 - TFD - EP 3-5.mgf

Click mouse within plot area to zoom in by factor of two about that point

Or, Plot from  to  Da

Label all possible matches  Label matches used for scoring

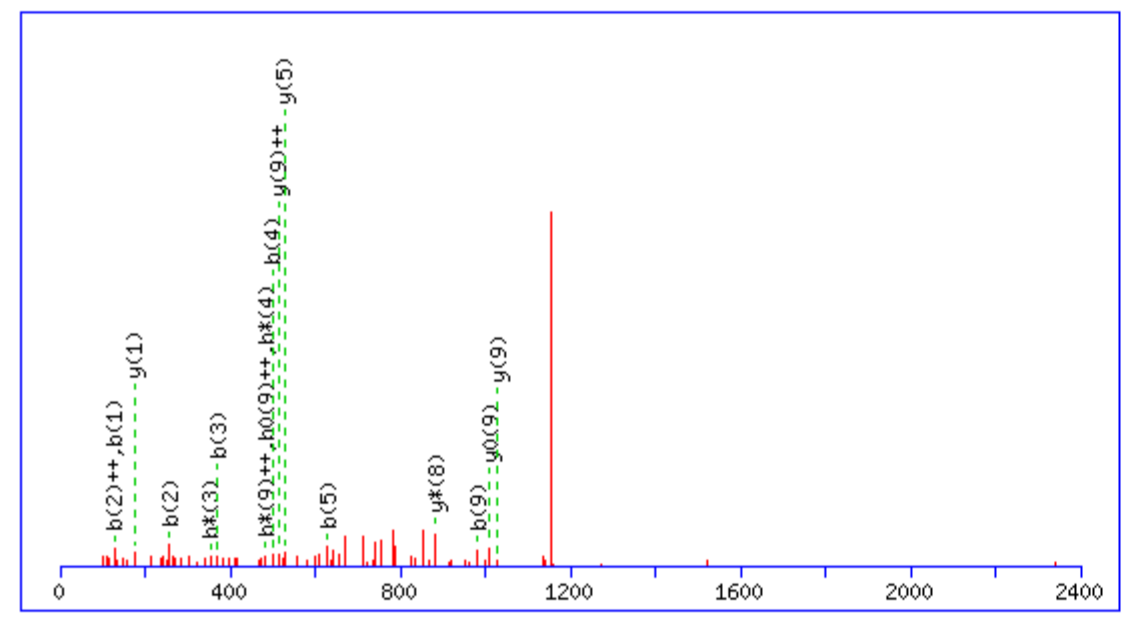

Monoisotopic mass of neutral peptide Mr(calc): 1155.624756  
 Fixed modifications: Propionamide (C) (apply to specified residues or termini only)  
 Ions Score: 37 Expect: 0.0026  
 Matches : 17/94 fragment ions using 22 most intense peaks [\(help\)](#)

| #  | b                 | b <sup>++</sup>   | b <sup>*</sup>    | b <sup>***</sup>  | b <sup>0</sup> | b <sup>0++</sup>  | Seq. | y                  | y <sup>++</sup>   | y <sup>*</sup>    | y <sup>***</sup> | y <sup>0</sup>     | y <sup>0++</sup> | #  |
|----|-------------------|-------------------|-------------------|-------------------|----------------|-------------------|------|--------------------|-------------------|-------------------|------------------|--------------------|------------------|----|
| 1  | <b>129.065854</b> | 65.036565         | 112.039305        | 56.523291         |                |                   | Q    |                    |                   |                   |                  |                    |                  | 10 |
| 2  | <b>258.108447</b> | <b>129.557862</b> | 241.081898        | 121.044587        | 240.097882     | 120.552579        | E    | <b>1028.573486</b> | <b>514.790381</b> | 1011.546937       | 506.277107       | <b>1010.562921</b> | 505.785099       | 9  |
| 3  | <b>371.192511</b> | 186.099894        | <b>354.165962</b> | 177.586619        | 353.181946     | 177.094611        | L    | 899.530893         | 450.269085        | <b>882.504344</b> | 441.755810       | 881.520328         | 441.263802       | 8  |
| 4  | <b>500.235104</b> | 250.621190        | <b>483.208555</b> | 242.107916        | 482.224539     | 241.615908        | E    | 786.446829         | 393.727053        | 769.420280        | 385.213778       | 768.436264         | 384.721770       | 7  |
| 5  | <b>628.293682</b> | 314.650479        | 611.267133        | 306.137205        | 610.283117     | 305.645197        | Q    | 657.404236         | 329.205756        | 640.377687        | 320.692482       |                    |                  | 6  |
| 6  | 699.330796        | 350.169036        | 682.304247        | 341.655762        | 681.320231     | 341.163754        | A    | <b>529.345658</b>  | 265.176467        | 512.319109        | 256.663193       |                    |                  | 5  |
| 7  | 812.414860        | 406.711068        | 795.388311        | 398.197794        | 794.404295     | 397.705786        | L    | 458.308544         | 229.657910        | 441.281995        | 221.144635       |                    |                  | 4  |
| 8  | 869.436324        | 435.221800        | 852.409775        | 426.708526        | 851.425759     | 426.216518        | G    | 345.224480         | 173.115878        | 328.197931        | 164.602603       |                    |                  | 3  |
| 9  | <b>982.520388</b> | 491.763832        | 965.493839        | <b>483.250558</b> | 964.509823     | <b>482.758550</b> | I    | 288.203016         | 144.605146        | 271.176467        | 136.091871       |                    |                  | 2  |
| 10 |                   |                   |                   |                   |                |                   | R    | <b>175.118952</b>  | 88.063114         | 158.092403        | 79.549839        |                    |                  | 1  |

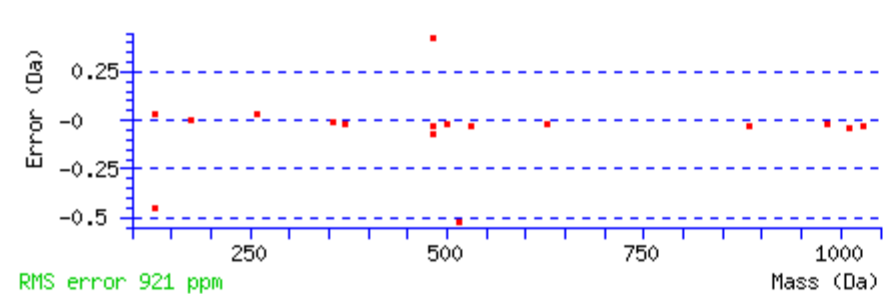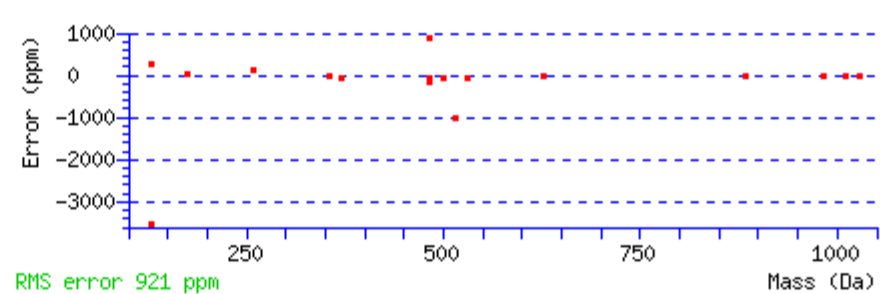

NCBI BLAST search of **QELEQALGIR**  
 (Parameters: blastp, nr protein database, expect=20000, no filter, PAM30)  
 Other BLAST [web gateways](#)

### All matches to this query

| Score | Mr(calc):   | Delta     | Sequence                      |
|-------|-------------|-----------|-------------------------------|
| 36.8  | 1155.624756 | -0.006648 | <a href="#">QELEQALGIR</a>    |
| 18.2  | 1155.610840 | 0.007268  | <a href="#">QQQQEALRR</a>     |
| 15.2  | 1155.618240 | -0.000132 | <a href="#">AGKPPCGATKR</a>   |
| 14.3  | 1155.610855 | 0.007253  | <a href="#">GAGAGLSRPGSAR</a> |
| 13.4  | 1155.624771 | -0.006663 | <a href="#">KEIPSQAVPR</a>    |
| 12.6  | 1155.624771 | -0.006663 | <a href="#">SSPQLDPLRK</a>    |
| 12.4  | 1155.624756 | -0.006648 | <a href="#">ELEQQLAAVR</a>    |
| 12.3  | 1155.624771 | -0.006663 | <a href="#">SSPQLDPLRK</a>    |
| 10.0  | 1155.607010 | 0.011098  | <a href="#">CGIPEALVQR</a>    |
| 9.2   | 1155.607010 | 0.011098  | <a href="#">QKPCDLPLR</a>     |



# {MATRIX} SCIENCE Mascot Search Results

## Peptide View

MS/MS Fragmentation of **AEGDSAGTAGTPGGTPAGDK**

Found in **SMRD2\_HUMAN**, SWI/SNF-related matrix-associated actin-dependent regulator of chromatin subfamily D member 2 OS=Homo sapiens  
GN=SMARCD2 PE=1 SV=3

Match to Query 966130: 1715.764828 from(858.889690,2+) rtinseconds(1045) index(158856)

Title: Locus:1.1.1.1082.41

Data file C:\Program Files (x86)\Matrix Science\Mascot Daemon\mgf3 TFD - Epitel - R2\mascot\_daemon\_merge.mgf

Click mouse within plot area to zoom in by factor of two about that point

Or, Plot from  to  Da

Label all possible matches  Label matches used for scoring

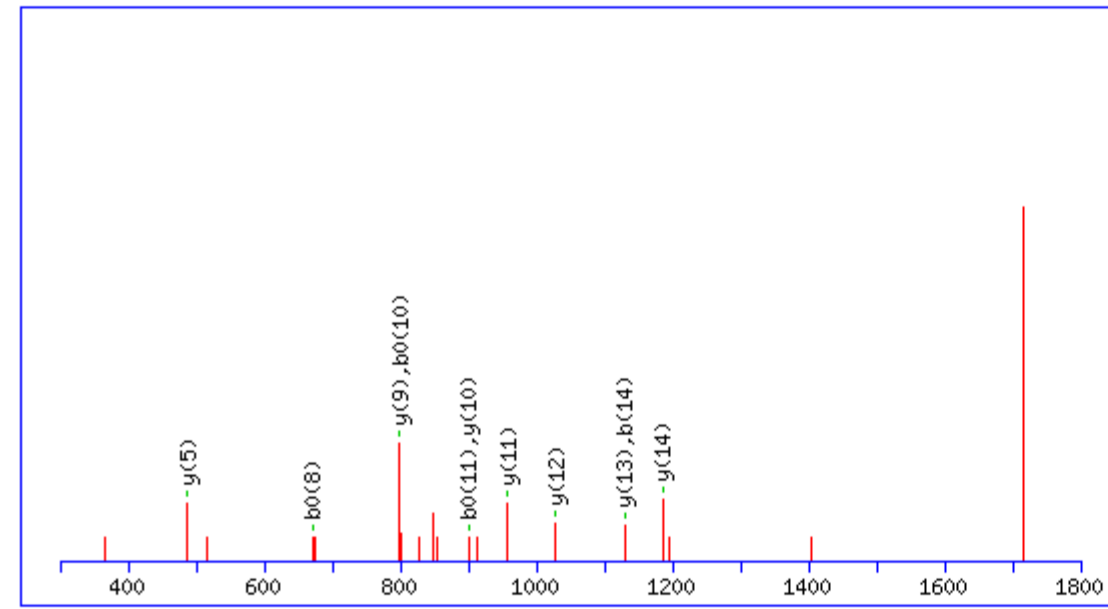

Monoisotopic mass of neutral peptide  $M_r(\text{calc})$ : 1715.759857

Fixed modifications: Carbamidomethyl (C) (apply to specified residues or termini only)

Ions Score: 43 Expect: 0.00017

Matches : 11/186 fragment ions using 14 most intense peaks [\(help\)](#)

| #  | b                  | b <sup>++</sup> | b <sup>0</sup>    | b <sup>0++</sup> | Seq. | y                  | y <sup>++</sup> | y <sup>*</sup> | y <sup>**++</sup> | y <sup>0</sup> | y <sup>0++</sup> | #  |
|----|--------------------|-----------------|-------------------|------------------|------|--------------------|-----------------|----------------|-------------------|----------------|------------------|----|
| 1  | 72.044390          | 36.525833       |                   |                  | A    |                    |                 |                |                   |                |                  | 20 |
| 2  | 201.086983         | 101.047130      | 183.076418        | 92.041847        | E    | 1645.730002        | 823.368639      | 1628.703453    | 814.855365        | 1627.719437    | 814.363357       | 19 |
| 3  | 258.108447         | 129.557862      | 240.097882        | 120.552579       | G    | 1516.687409        | 758.847343      | 1499.660860    | 750.334068        | 1498.676844    | 749.842060       | 18 |
| 4  | 373.135390         | 187.071333      | 355.124825        | 178.066051       | D    | 1459.665945        | 730.336611      | 1442.639396    | 721.823336        | 1441.655380    | 721.331328       | 17 |
| 5  | 460.167418         | 230.587347      | 442.156853        | 221.582065       | S    | 1344.639002        | 672.823139      | 1327.612453    | 664.309865        | 1326.628437    | 663.817857       | 16 |
| 6  | 531.204532         | 266.105904      | 513.193967        | 257.100622       | A    | 1257.606974        | 629.307125      | 1240.580425    | 620.793851        | 1239.596409    | 620.301843       | 15 |
| 7  | 588.225996         | 294.616636      | 570.215431        | 285.611354       | G    | <b>1186.569860</b> | 593.788568      | 1169.543311    | 585.275294        | 1168.559295    | 584.783286       | 14 |
| 8  | 689.273675         | 345.140476      | <b>671.263110</b> | 336.135193       | T    | <b>1129.548396</b> | 565.277836      | 1112.521847    | 556.764562        | 1111.537831    | 556.272554       | 13 |
| 9  | 760.310789         | 380.659033      | 742.300224        | 371.653750       | A    | <b>1028.500717</b> | 514.753997      | 1011.474168    | 506.240722        | 1010.490152    | 505.748714       | 12 |
| 10 | 817.332253         | 409.169765      | <b>799.321688</b> | 400.164482       | G    | <b>957.463603</b>  | 479.235440      | 940.437054     | 470.722165        | 939.453038     | 470.230157       | 11 |
| 11 | 918.379932         | 459.693604      | <b>900.369367</b> | 450.688322       | T    | <b>900.442139</b>  | 450.724708      | 883.415590     | 442.211433        | 882.431574     | 441.719425       | 10 |
| 12 | 1015.432696        | 508.219986      | 997.422131        | 499.214704       | P    | <b>799.394460</b>  | 400.200868      | 782.367911     | 391.687594        | 781.383895     | 391.195586       | 9  |
| 13 | 1072.454160        | 536.730718      | 1054.443595       | 527.725436       | G    | 702.341696         | 351.674486      | 685.315147     | 343.161212        | 684.331131     | 342.669204       | 8  |
| 14 | <b>1129.475624</b> | 565.241450      | 1111.465059       | 556.236168       | G    | 645.320232         | 323.163754      | 628.293683     | 314.650480        | 627.309667     | 314.158472       | 7  |
| 15 | 1230.523303        | 615.765290      | 1212.512738       | 606.760007       | T    | 588.298768         | 294.653022      | 571.272219     | 286.139748        | 570.288203     | 285.647740       | 6  |
| 16 | 1327.576067        | 664.291672      | 1309.565502       | 655.286389       | P    | <b>487.251089</b>  | 244.129182      | 470.224540     | 235.615908        | 469.240524     | 235.123900       | 5  |
| 17 | 1398.613181        | 699.810229      | 1380.602616       | 690.804946       | A    | 390.198325         | 195.602800      | 373.171776     | 187.089526        | 372.187760     | 186.597518       | 4  |
| 18 | 1455.634645        | 728.320961      | 1437.624080       | 719.315678       | G    | 319.161211         | 160.084243      | 302.134662     | 151.570969        | 301.150646     | 151.078961       | 3  |
| 19 | 1570.661588        | 785.834432      | 1552.651023       | 776.829150       | D    | 262.139747         | 131.573512      | 245.113198     | 123.060237        | 244.129182     | 122.568229       | 2  |
| 20 |                    |                 |                   |                  | K    | 147.112804         | 74.060040       | 130.086255     | 65.546765         |                |                  | 1  |

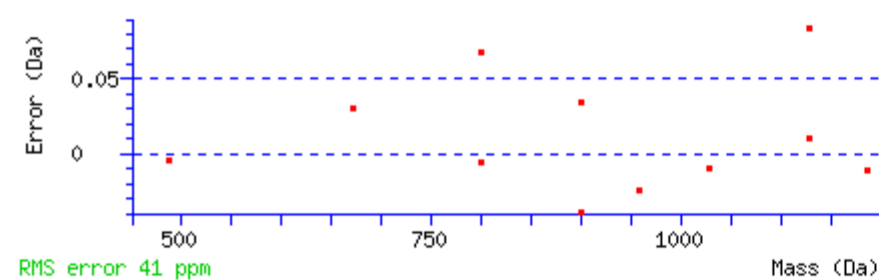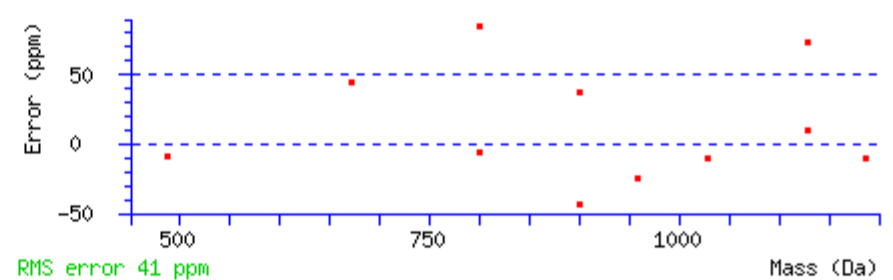

NCBI BLAST search of [AEGDSAGTAGTPGGTPAGDK](#)

(Parameters: blastp, nr protein database, expect=20000, no filter, PAM30)

Other BLAST [web gateways](#)

## All matches to this query

| Score | $M_r(\text{calc})$ : | Delta     | Sequence                             |
|-------|----------------------|-----------|--------------------------------------|
| 42.7  | 1715.759857          | 0.004971  | <a href="#">AEGDSAGTAGTPGGTPAGDK</a> |
| 2.3   | 1715.775970          | -0.011142 | <a href="#">ECCRFFGDNGLTLK</a>       |
| 0.3   | 1715.778458          | -0.013630 | <a href="#">PAAALNAAGSVHSPSTSM</a>   |

# MASCOT SEARCH RESULTS

## Peptide View

MS/MS Fragmentation of **AGGAFDPYTLVR**

Found in **SNG1\_HUMAN**, Synaptogyrin-1 OS=Homo sapiens GN=SYNGR1 PE=1 SV=2

Match to Query 34368: 1265.640668 from(633.827610,2+) rtinseconds(2972) index(39232)

Title: Locus:1.1.1.2283.32

Data file 2011-11-12 - TFD - EP 6-6.mgf

Click mouse within plot area to zoom in by factor of two about that point

Or, Plot from  to  Da

Label all possible matches  Label matches used for scoring

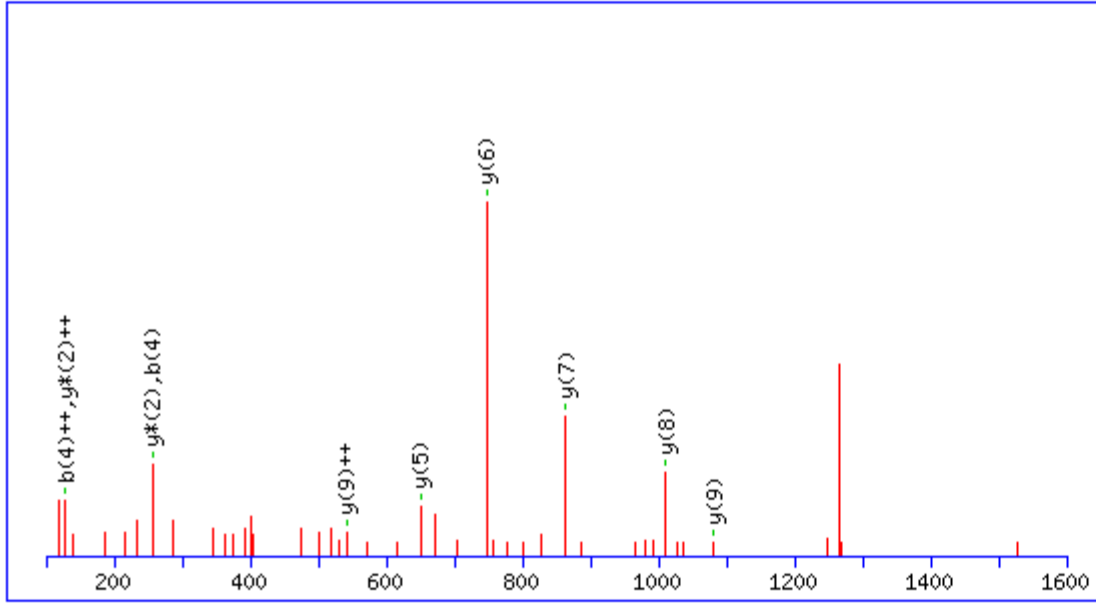

Monoisotopic mass of neutral peptide Mr(calc): 1265.640442

Fixed modifications: Propionamide (C) (apply to specified residues or termini only)

Ions Score: 37 Expect: 0.0025

Matches : 11/94 fragment ions using 11 most intense peaks ([help](#))

| #  | b                 | b <sup>++</sup>   | b <sup>0</sup> | b <sup>0++</sup> | Seq. | y                  | y <sup>++</sup>   | y <sup>*</sup>    | y <sup>*++</sup>  | y <sup>0</sup> | y <sup>0++</sup> | #  |
|----|-------------------|-------------------|----------------|------------------|------|--------------------|-------------------|-------------------|-------------------|----------------|------------------|----|
| 1  | 72.044390         | 36.525833         |                |                  | A    |                    |                   |                   |                   |                |                  | 12 |
| 2  | <b>129.065854</b> | 65.036565         |                |                  | G    | 1195.610601        | 598.308939        | 1178.584052       | 589.795664        | 1177.600036    | 589.303656       | 11 |
| 3  | 186.087318        | 93.547297         |                |                  | G    | 1138.589137        | 569.798207        | 1121.562588       | 561.284932        | 1120.578572    | 560.792924       | 10 |
| 4  | <b>257.124432</b> | <b>129.065854</b> |                |                  | A    | <b>1081.567673</b> | <b>541.287475</b> | 1064.541124       | 532.774200        | 1063.557108    | 532.282192       | 9  |
| 5  | 404.192846        | 202.600061        |                |                  | F    | <b>1010.530559</b> | 505.768918        | 993.504010        | 497.255643        | 992.519994     | 496.763635       | 8  |
| 6  | 519.219789        | 260.113533        | 501.209224     | 251.108250       | D    | <b>863.462145</b>  | 432.234711        | 846.435596        | 423.721436        | 845.451580     | 423.229428       | 7  |
| 7  | 616.272553        | 308.639915        | 598.261988     | 299.634632       | P    | <b>748.435202</b>  | 374.721239        | 731.408653        | 366.207965        | 730.424637     | 365.715957       | 6  |
| 8  | 779.335882        | 390.171579        | 761.325317     | 381.166297       | Y    | <b>651.382438</b>  | 326.194857        | 634.355889        | 317.681583        | 633.371873     | 317.189575       | 5  |
| 9  | 880.383561        | 440.695419        | 862.372996     | 431.690136       | T    | 488.319109         | 244.663192        | 471.292560        | 236.149918        | 470.308544     | 235.657910       | 4  |
| 10 | 993.467625        | 497.237451        | 975.457060     | 488.232168       | L    | 387.271430         | 194.139353        | 370.244881        | 185.626078        |                |                  | 3  |
| 11 | 1092.536039       | 546.771658        | 1074.525474    | 537.766375       | V    | 274.187366         | 137.597321        | <b>257.160817</b> | <b>129.084046</b> |                |                  | 2  |
| 12 |                   |                   |                |                  | R    | 175.118952         | 88.063114         | 158.092403        | 79.549839         |                |                  | 1  |

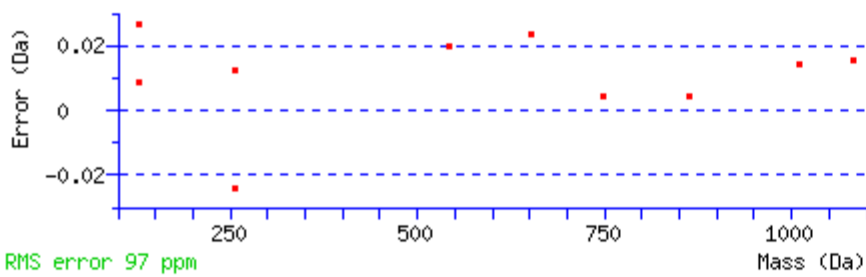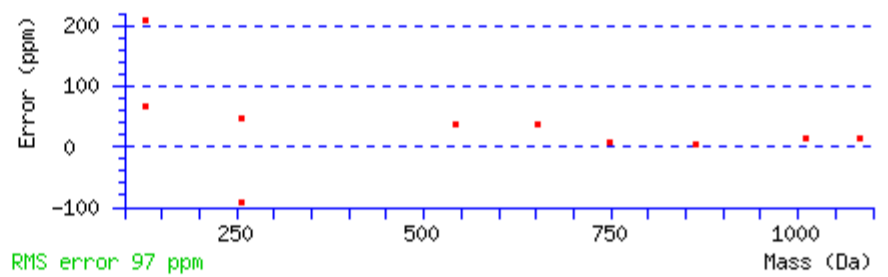

NCBI BLAST search of [AGGAFDPYTLVR](#)

(Parameters: blastp, nr protein database, expect=20000, no filter, PAM30)

Other BLAST [web gateways](#)

All matches to this query

| Score | Mr(calc):   | Delta    | Sequence                     |
|-------|-------------|----------|------------------------------|
| 36.7  | 1265.640442 | 0.000226 | <a href="#">AGGAFDPYTLVR</a> |

Mascot: <http://www.matrixscience.com/>

# MASCOT Search Results

## Peptide View

MS/MS Fragmentation of **ILGLAIESQDAGIK**

Found in **SNP23\_HUMAN**, Synaptosomal-associated protein 23 OS=Homo sapiens GN=SNAP23 PE=1 SV=1

Match to Query 42372: 1426.791248 from(714.402900,2+) rtinseconds(2933) index(38718)

Title: Locus:1.1.1.2431.41

Data file 2011-11-10 - TFD - EP 4-5.mgf

Click mouse within plot area to zoom in by factor of two about that point

Or, Plot from  to  Da

Label all possible matches  Label matches used for scoring

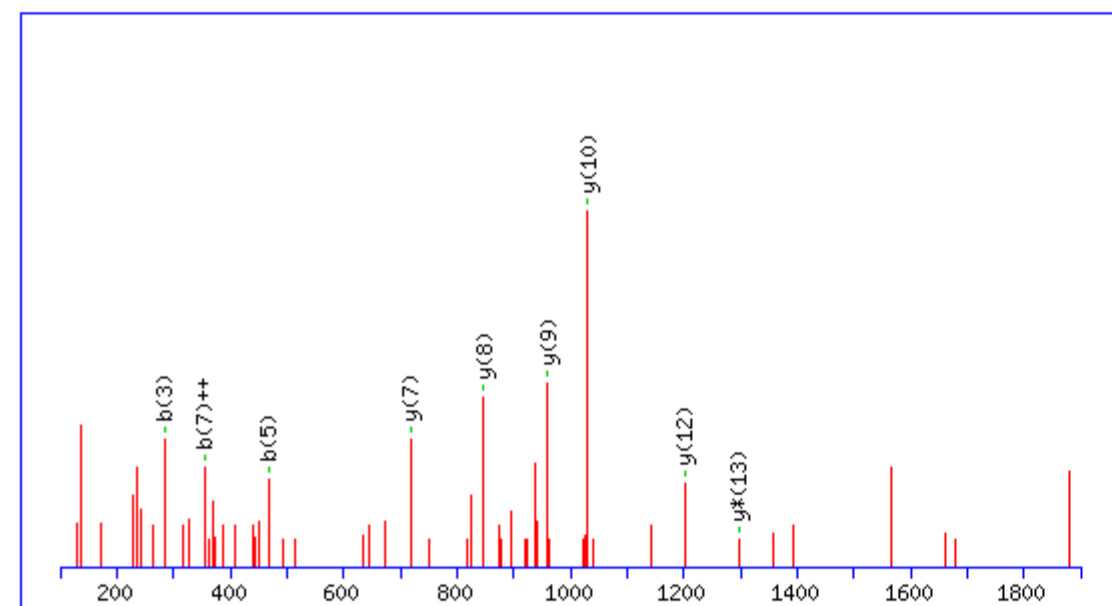

Monoisotopic mass of neutral peptide Mr(calc): 1426.803116

Fixed modifications: Propionamide (C) (apply to specified residues or termini only)

Ions Score: 34 Expect: 0.0046

Matches : 9/120 fragment ions using 12 most intense peaks [\(help\)](#)

| #  | b           | b <sup>++</sup> | b <sup>*</sup> | b <sup>+++</sup> | b <sup>0</sup> | b <sup>0++</sup> | Seq. | y           | y <sup>++</sup> | y <sup>*</sup> | y <sup>+++</sup> | y <sup>0</sup> | y <sup>0++</sup> | #  |
|----|-------------|-----------------|----------------|------------------|----------------|------------------|------|-------------|-----------------|----------------|------------------|----------------|------------------|----|
| 1  | 114.091340  | 57.549308       |                |                  |                |                  | I    |             |                 |                |                  |                |                  | 14 |
| 2  | 227.175404  | 114.091340      |                |                  |                |                  | L    | 1314.726358 | 657.866817      | 1297.699809    | 649.353543       | 1296.715793    | 648.861535       | 13 |
| 3  | 284.196868  | 142.602072      |                |                  |                |                  | G    | 1201.642294 | 601.324785      | 1184.615745    | 592.811511       | 1183.631729    | 592.319503       | 12 |
| 4  | 397.280932  | 199.144104      |                |                  |                |                  | L    | 1144.620830 | 572.814053      | 1127.594281    | 564.300779       | 1126.610265    | 563.808771       | 11 |
| 5  | 468.318046  | 234.662661      |                |                  |                |                  | A    | 1031.536766 | 516.272021      | 1014.510217    | 507.758746       | 1013.526201    | 507.266738       | 10 |
| 6  | 581.402110  | 291.204693      |                |                  |                |                  | I    | 960.499652  | 480.753464      | 943.473103     | 472.240189       | 942.489087     | 471.748181       | 9  |
| 7  | 710.444703  | 355.725990      |                |                  | 692.434138     | 346.720707       | E    | 847.415588  | 424.211432      | 830.389039     | 415.698157       | 829.405023     | 415.206149       | 8  |
| 8  | 797.476731  | 399.242004      |                |                  | 779.466166     | 390.236721       | S    | 718.372995  | 359.690136      | 701.346446     | 351.176861       | 700.362430     | 350.684853       | 7  |
| 9  | 925.535309  | 463.271293      | 908.508760     | 454.758018       | 907.524744     | 454.266010       | Q    | 631.340967  | 316.174122      | 614.314418     | 307.660847       | 613.330402     | 307.168839       | 6  |
| 10 | 1040.562252 | 520.784764      | 1023.535703    | 512.271490       | 1022.551687    | 511.779482       | D    | 503.282389  | 252.144832      | 486.255840     | 243.631558       | 485.271824     | 243.139550       | 5  |
| 11 | 1111.599366 | 556.303321      | 1094.572817    | 547.790047       | 1093.588801    | 547.298039       | A    | 388.255446  | 194.631361      | 371.228897     | 186.118086       |                |                  | 4  |
| 12 | 1168.620830 | 584.814053      | 1151.594281    | 576.300779       | 1150.610265    | 575.808771       | G    | 317.218332  | 159.112804      | 300.191783     | 150.599529       |                |                  | 3  |
| 13 | 1281.704894 | 641.356085      | 1264.678345    | 632.842811       | 1263.694329    | 632.350802       | I    | 260.196868  | 130.602072      | 243.170319     | 122.088797       |                |                  | 2  |
| 14 |             |                 |                |                  |                |                  | K    | 147.112804  | 74.060040       | 130.086255     | 65.546765        |                |                  | 1  |

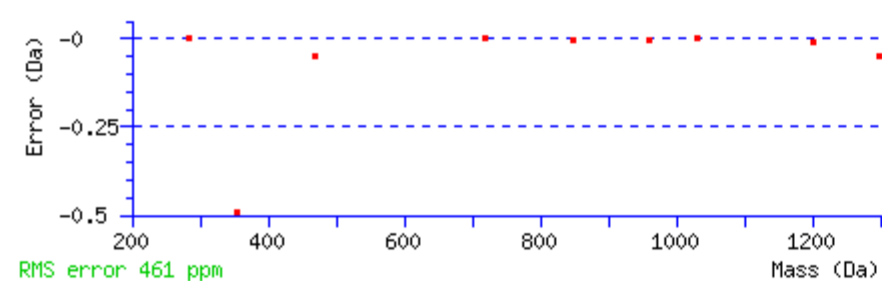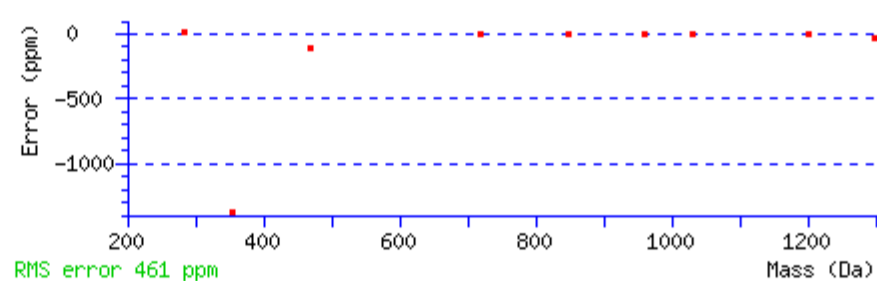

NCBI BLAST search of **ILGLAIESQDAGIK**

(Parameters: blastp, nr protein database, expect=20000, no filter, PAM30)

Other BLAST [web gateways](#)

All matches to this query

| Score | Mr(calc):   | Delta     | Sequence                       |
|-------|-------------|-----------|--------------------------------|
| 33.9  | 1426.803116 | -0.011868 | <a href="#">ILGLAIESQDAGIK</a> |
| 11.3  | 1426.785370 | 0.005878  | <a href="#">LLQPAQVCDILK</a>   |
| 11.1  | 1426.793243 | -0.001995 | <a href="#">HLAELSVPPVPPR</a>  |
| 7.2   | 1426.793243 | -0.001995 | <a href="#">HLAELSVPPVPPR</a>  |
| 7.2   | 1426.803986 | -0.012738 | <a href="#">QILHLITMMALK</a>   |
| 5.8   | 1426.803986 | -0.012738 | <a href="#">QILHLITMMALK</a>   |
| 4.4   | 1426.793228 | -0.001980 | <a href="#">VSPLAAFLASAPQR</a> |
| 3.1   | 1426.793243 | -0.001995 | <a href="#">HLAELSVPPVPPR</a>  |
| 0.3   | 1426.785370 | 0.005878  | <a href="#">IPGLCPDGKSILK</a>  |

# MASCOT SCIENCE Mascot Search Results

## Peptide View

MS/MS Fragmentation of **VGVASSEELAR**

Found in **SNP29\_HUMAN**, Synaptosomal-associated protein 29 OS=Homo sapiens GN=SNAP29 PE=1 SV=1

Match to Query 416426: 1116.577328 from(559.295940,2+) rtinseconds(1567) index(339117)

Title: Locus:1.1.1.934.26

Data file C:\Program Files (x86)\Matrix Science\Mascot Daemon\mgf3 TFD - Epitel - R2\mascot\_daemon\_merge.mgf

Click mouse within plot area to zoom in by factor of two about that point

Or, Plot from  to  Da

Label all possible matches  Label matches used for scoring

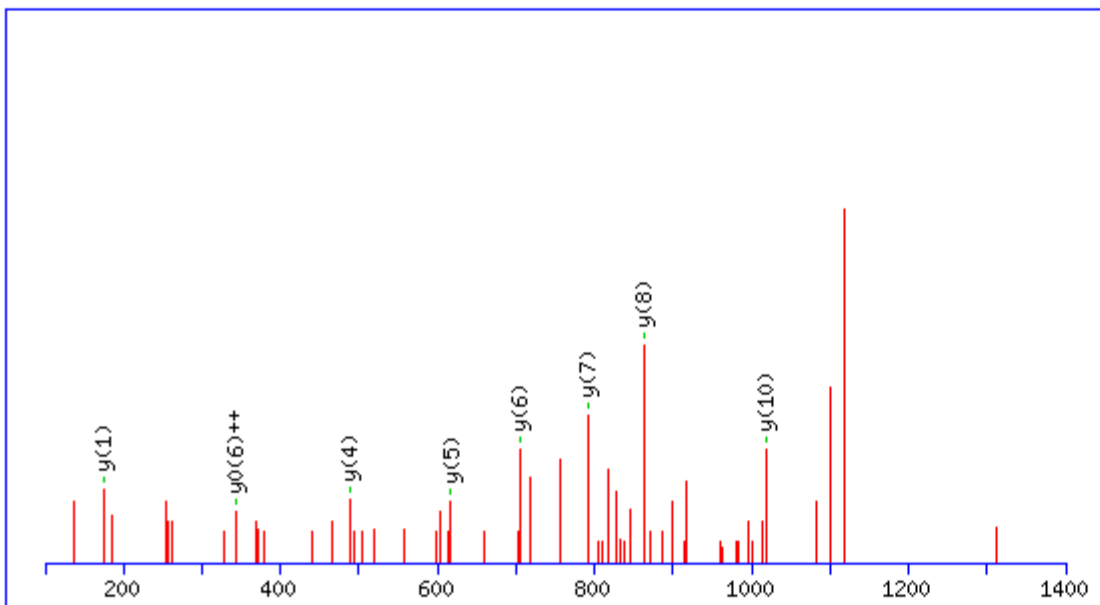

Monoisotopic mass of neutral peptide  $M_r(\text{calc})$ : 1116.577484

Fixed modifications: Carbamidomethyl (C) (apply to specified residues or termini only)

Ions Score: 68 Expect: 3e-006

Matches : 8/86 fragment ions using 10 most intense peaks [\(help\)](#)

| #  | b          | b <sup>++</sup> | b <sup>0</sup> | b <sup>0++</sup> | Seq. | y           | y <sup>++</sup> | y <sup>*</sup> | y <sup>+++</sup> | y <sup>0</sup> | y <sup>0++</sup> | #  |
|----|------------|-----------------|----------------|------------------|------|-------------|-----------------|----------------|------------------|----------------|------------------|----|
| 1  | 100.075690 | 50.541483       |                |                  | V    |             |                 |                |                  |                |                  | 11 |
| 2  | 157.097154 | 79.052215       |                |                  | G    | 1018.516364 | 509.761820      | 1001.489815    | 501.248546       | 1000.505799    | 500.756538       | 10 |
| 3  | 256.165568 | 128.586422      |                |                  | V    | 961.494900  | 481.251088      | 944.468351     | 472.737814       | 943.484335     | 472.245806       | 9  |
| 4  | 327.202682 | 164.104979      |                |                  | A    | 862.426486  | 431.716881      | 845.399937     | 423.203607       | 844.415921     | 422.711599       | 8  |
| 5  | 414.234710 | 207.620993      | 396.224145     | 198.615711       | S    | 791.389372  | 396.198324      | 774.362823     | 387.685050       | 773.378807     | 387.193042       | 7  |
| 6  | 501.266738 | 251.137007      | 483.256173     | 242.131724       | S    | 704.357344  | 352.682310      | 687.330795     | 344.169036       | 686.346779     | 343.677028       | 6  |
| 7  | 630.309331 | 315.658304      | 612.298766     | 306.653021       | E    | 617.325316  | 309.166296      | 600.298767     | 300.653022       | 599.314751     | 300.161014       | 5  |
| 8  | 759.351924 | 380.179600      | 741.341359     | 371.174318       | E    | 488.282723  | 244.645000      | 471.256174     | 236.131725       | 470.272158     | 235.639717       | 4  |
| 9  | 872.435988 | 436.721632      | 854.425423     | 427.716350       | L    | 359.240130  | 180.123703      | 342.213581     | 171.610429       |                |                  | 3  |
| 10 | 943.473102 | 472.240189      | 925.462537     | 463.234907       | A    | 246.156066  | 123.581671      | 229.129517     | 115.068397       |                |                  | 2  |
| 11 |            |                 |                |                  | R    | 175.118952  | 88.063114       | 158.092403     | 79.549840        |                |                  | 1  |

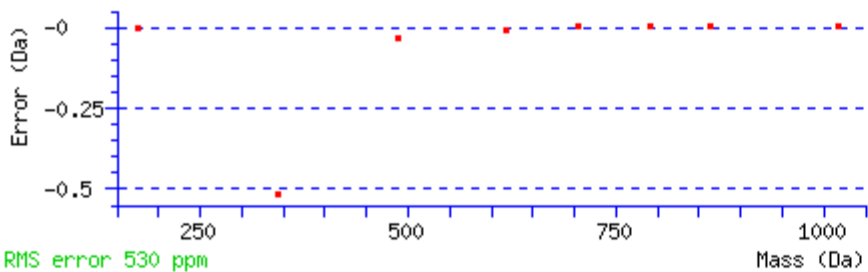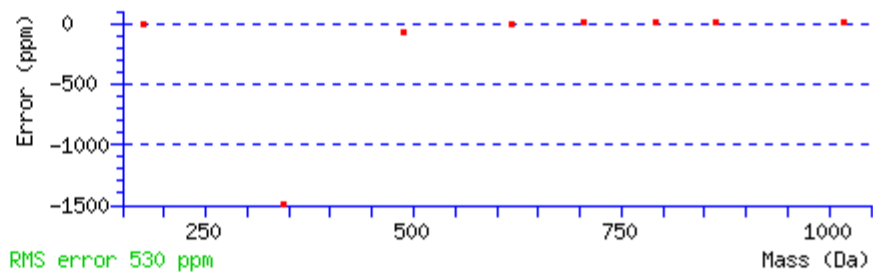

NCBI BLAST search of [VGVASSEELAR](#)

(Parameters: blastp, nr protein database, expect=20000, no filter, PAM30)

Other BLAST [web gateways](#)

## All matches to this query

| Score | $M_r(\text{calc})$ : | Delta     | Sequence                     |
|-------|----------------------|-----------|------------------------------|
| 67.9  | 1116.577484          | -0.000156 | <a href="#">VGVASSEELAR</a>  |
| 36.0  | 1116.577515          | -0.000187 | <a href="#">VTVVDVNESR</a>   |
| 3.6   | 1116.567612          | 0.009716  | <a href="#">AAPAFKGGGGPR</a> |
| 2.8   | 1116.584930          | -0.007602 | <a href="#">VTCPPPTVTVK</a>  |

Mascot: <http://www.matrixscience.com/>

**Peptide View**

MS/MS Fragmentation of **ILTGDFWFQEAR**  
 Found in **SYTL1\_HUMAN**, Synaptotagmin-like protein 1 OS=Homo sapiens GN=SYTL1 PE=1 SV=1

Match to Query 39543: 1334.666528 from(668.340540,2+) rtinseconds(3065) index(42076)  
 Title: Locus:1.1.1.2589.31  
 Data file 2011-11-14 - TFD - EP 8-2.mgf

Click mouse within plot area to zoom in by factor of two about that point  
 Or, Plot from  to  Da   
 Label all possible matches  Label matches used for scoring

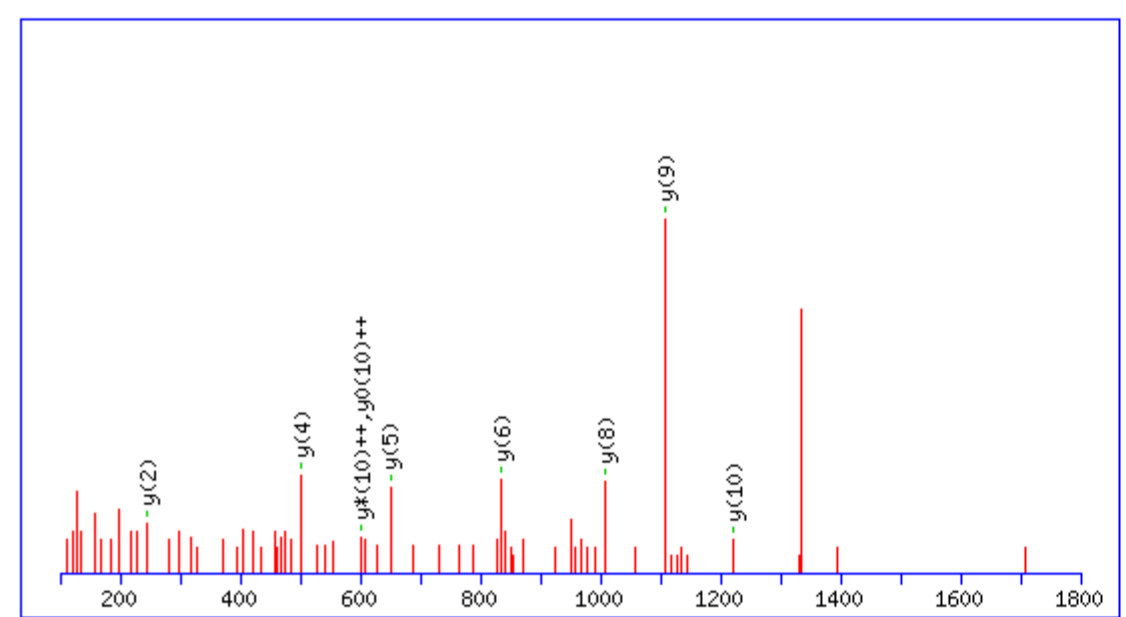

Monoisotopic mass of neutral peptide Mr(calc): 1334.661896  
 Fixed modifications: Propionamide (C) (apply to specified residues or termini only)  
 Ions Score: 49 Expect: 3.3e-005  
 Matches : 9/98 fragment ions using 13 most intense peaks ([help](#))

| #  | b           | b <sup>++</sup> | b <sup>*</sup> | b <sup>*++</sup> | b <sup>0</sup> | b <sup>0++</sup> | Seq. | y           | y <sup>++</sup> | y <sup>*</sup> | y <sup>*++</sup> | y <sup>0</sup> | y <sup>0++</sup> | #  |
|----|-------------|-----------------|----------------|------------------|----------------|------------------|------|-------------|-----------------|----------------|------------------|----------------|------------------|----|
| 1  | 114.091340  | 57.549308       |                |                  |                |                  | I    |             |                 |                |                  |                |                  | 11 |
| 2  | 227.175404  | 114.091340      |                |                  |                |                  | L    | 1222.585114 | 611.796195      | 1205.558565    | 603.282921       | 1204.574549    | 602.790913       | 10 |
| 3  | 328.223083  | 164.615179      |                |                  | 310.212518     | 155.609897       | T    | 1109.501050 | 555.254163      | 1092.474501    | 546.740889       | 1091.490485    | 546.248881       | 9  |
| 4  | 385.244547  | 193.125911      |                |                  | 367.233982     | 184.120629       | G    | 1008.453371 | 504.730324      | 991.426822     | 496.217049       | 990.442806     | 495.725041       | 8  |
| 5  | 500.271490  | 250.639383      |                |                  | 482.260925     | 241.634100       | D    | 951.431907  | 476.219592      | 934.405358     | 467.706317       | 933.421342     | 467.214309       | 7  |
| 6  | 686.350803  | 343.679040      |                |                  | 668.340238     | 334.673757       | W    | 836.404964  | 418.706120      | 819.378415     | 410.192846       | 818.394399     | 409.700838       | 6  |
| 7  | 833.419217  | 417.213247      |                |                  | 815.408652     | 408.207964       | F    | 650.325651  | 325.666464      | 633.299102     | 317.153189       | 632.315086     | 316.661181       | 5  |
| 8  | 961.477795  | 481.242536      | 944.451246     | 472.729261       | 943.467230     | 472.237253       | Q    | 503.257237  | 252.132257      | 486.230688     | 243.618982       | 485.246672     | 243.126974       | 4  |
| 9  | 1090.520388 | 545.763832      | 1073.493839    | 537.250558       | 1072.509823    | 536.758550       | E    | 375.198659  | 188.102968      | 358.172110     | 179.589693       | 357.188094     | 179.097685       | 3  |
| 10 | 1161.557502 | 581.282389      | 1144.530953    | 572.769115       | 1143.546937    | 572.277107       | A    | 246.156066  | 123.581671      | 229.129517     | 115.068396       |                |                  | 2  |
| 11 |             |                 |                |                  |                |                  | R    | 175.118952  | 88.063114       | 158.092403     | 79.549839        |                |                  | 1  |

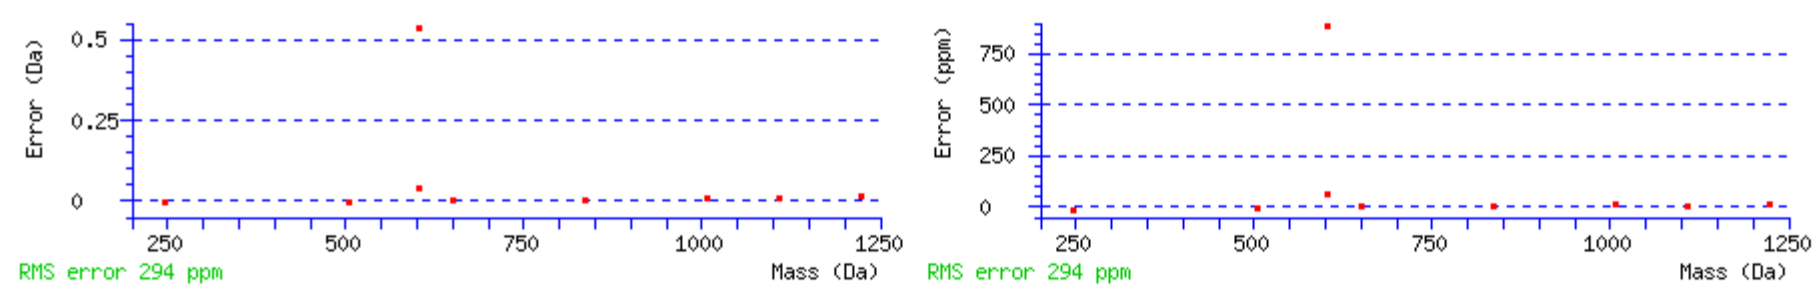

NCBI BLAST search of **ILTGDFWFQEAR**  
 (Parameters: blastp, nr protein database, expect=20000, no filter, PAM30)  
 Other BLAST [web gateways](#)

**All matches to this query**

| Score | Mr(calc):   | Delta     | Sequence                     |
|-------|-------------|-----------|------------------------------|
| 49.2  | 1334.661896 | 0.004632  | <a href="#">ILTGDFWFQEAR</a> |
| 1.4   | 1334.675827 | -0.009299 | <a href="#">LPPDYVPFEVK</a>  |
| 1.4   | 1334.675827 | -0.009299 | <a href="#">LPPDYVPFEVK</a>  |

# **MASCOT** Mascot Search Results

## Peptide View

MS/MS Fragmentation of **ISQATAQIK**

Found in **STX12\_HUMAN**, Syntaxin-12 OS=Homo sapiens GN=STX12 PE=1 SV=1

Match to Query 12874: 958.542988 from(480.278770,2+) rtinseconds(1077) index(4508)

Title: Locus:1.1.1.1828.22

Data file 2011-11-12 - TFD - EP 5-4.mgf

Click mouse within plot area to zoom in by factor of two about that point

Or, Plot from  to  Da

Label all possible matches  Label matches used for scoring

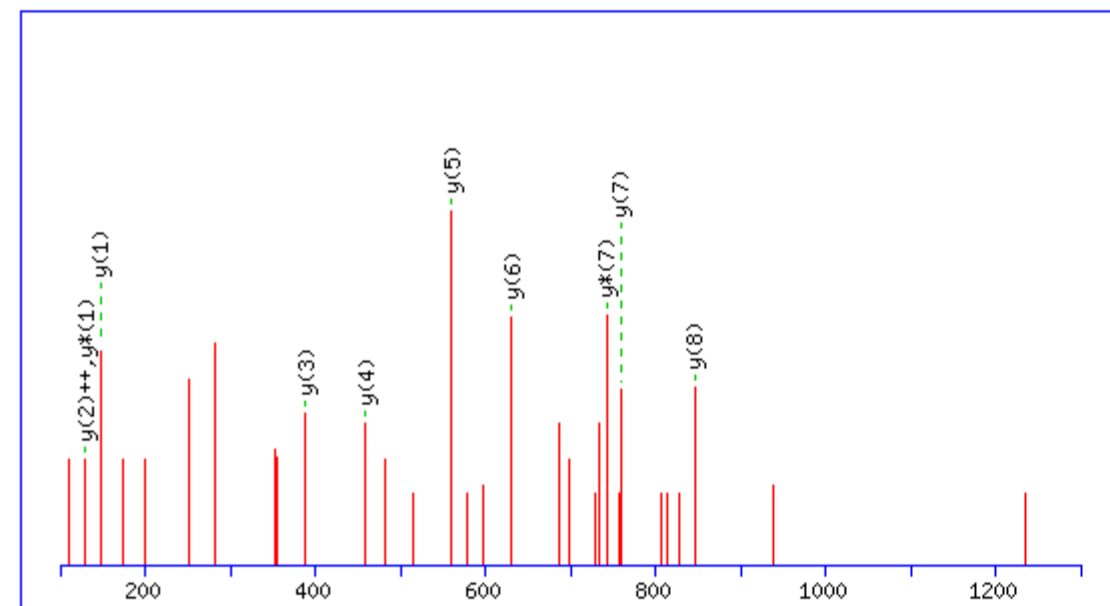

Monoisotopic mass of neutral peptide Mr(calc): 958.544724

Fixed modifications: Propionamide (C) (apply to specified residues or termini only)

Ions Score: 52 Expect: 9.2e-005

Matches : 10/82 fragment ions using 17 most intense peaks ([help](#))

| # | b          | b <sup>++</sup> | b <sup>*</sup> | b <sup>*++</sup> | b <sup>0</sup> | b <sup>0++</sup> | Seq. | y          | y <sup>++</sup> | y <sup>*</sup> | y <sup>*++</sup> | y <sup>0</sup> | y <sup>0++</sup> | # |
|---|------------|-----------------|----------------|------------------|----------------|------------------|------|------------|-----------------|----------------|------------------|----------------|------------------|---|
| 1 | 114.091340 | 57.549308       |                |                  |                |                  | I    |            |                 |                |                  |                |                  | 9 |
| 2 | 201.123368 | 101.065322      |                |                  | 183.112803     | 92.060039        | S    | 846.467959 | 423.737618      | 829.441410     | 415.224343       | 828.457394     | 414.732335       | 8 |
| 3 | 329.181946 | 165.094611      | 312.155397     | 156.581336       | 311.171381     | 156.089328       | Q    | 759.435931 | 380.221604      | 742.409382     | 371.708329       | 741.425366     | 371.216321       | 7 |
| 4 | 400.219060 | 200.613168      | 383.192511     | 192.099893       | 382.208495     | 191.607885       | A    | 631.377353 | 316.192315      | 614.350804     | 307.679040       | 613.366788     | 307.187032       | 6 |
| 5 | 501.266739 | 251.137007      | 484.240190     | 242.623733       | 483.256174     | 242.131725       | T    | 560.340239 | 280.673758      | 543.313690     | 272.160483       | 542.329674     | 271.668475       | 5 |
| 6 | 572.303853 | 286.655565      | 555.277304     | 278.142290       | 554.293288     | 277.650282       | A    | 459.292560 | 230.149918      | 442.266011     | 221.636643       |                |                  | 4 |
| 7 | 700.362431 | 350.684854      | 683.335882     | 342.171579       | 682.351866     | 341.679571       | Q    | 388.255446 | 194.631361      | 371.228897     | 186.118087       |                |                  | 3 |
| 8 | 813.446495 | 407.226886      | 796.419946     | 398.713611       | 795.435930     | 398.221603       | I    | 260.196868 | 130.602072      | 243.170319     | 122.088798       |                |                  | 2 |
| 9 |            |                 |                |                  |                |                  | K    | 147.112804 | 74.060040       | 130.086255     | 65.546765        |                |                  | 1 |

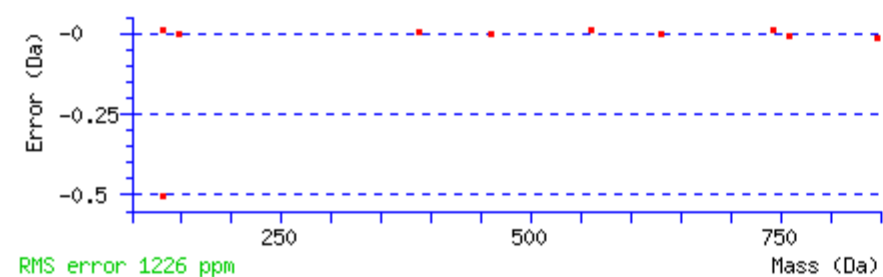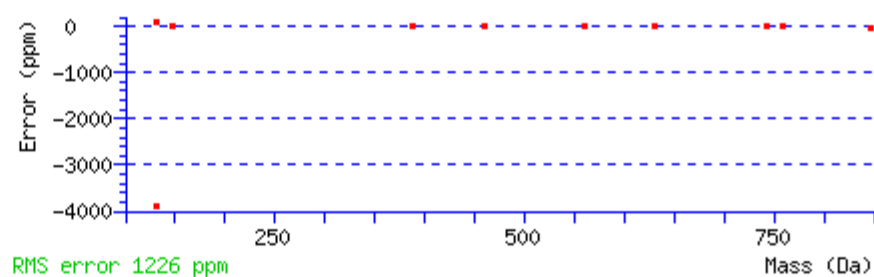

NCBI BLAST search of **ISQATAQIK**

(Parameters: blastp, nr protein database, expect=20000, no filter, PAM30)

Other BLAST [web gateways](#)

## All matches to this query

| Score | Mr(calc):  | Delta     | Sequence                  |
|-------|------------|-----------|---------------------------|
| 51.7  | 958.544724 | -0.001736 | <a href="#">ISQATAQIK</a> |
| 13.4  | 958.533478 | 0.009510  | <a href="#">ISLEEQLK</a>  |
| 10.9  | 958.533478 | 0.009510  | <a href="#">SPKEELLK</a>  |
| 7.7   | 958.544724 | -0.001736 | <a href="#">ATKSPAKPK</a> |
| 7.0   | 958.533493 | 0.009495  | <a href="#">LLDDATLAK</a> |
| 6.2   | 958.544739 | -0.001751 | <a href="#">LSIIGPTSR</a> |
| 5.2   | 958.533463 | 0.009525  | <a href="#">EAELEKLK</a>  |
| 5.1   | 958.544739 | -0.001751 | <a href="#">ISGVNLTQK</a> |
| 5.1   | 958.533508 | 0.009480  | <a href="#">ISLAPTDVK</a> |
| 5.1   | 958.544724 | -0.001736 | <a href="#">ISLDDLK</a>   |

# **MASCOT** Mascot Search Results

## Peptide View

MS/MS Fragmentation of **QALSEIEGR**

Found in **STX3\_HUMAN**, Syntaxin-3 OS=Homo sapiens GN=STX3 PE=1 SV=3

Match to Query 263343: 1001.513508 from(501.764030,2+) rtinseconds(1593) index(504132)

Title: Locus:1.1.1.936.13

Data file C:\Program Files (x86)\Matrix Science\Mascot Daemon\mgf3 TFD - Epitel - R2\mascot\_daemon\_merge.mgf

Click mouse within plot area to zoom in by factor of two about that point

Or, Plot from  to  Da

Label all possible matches  Label matches used for scoring

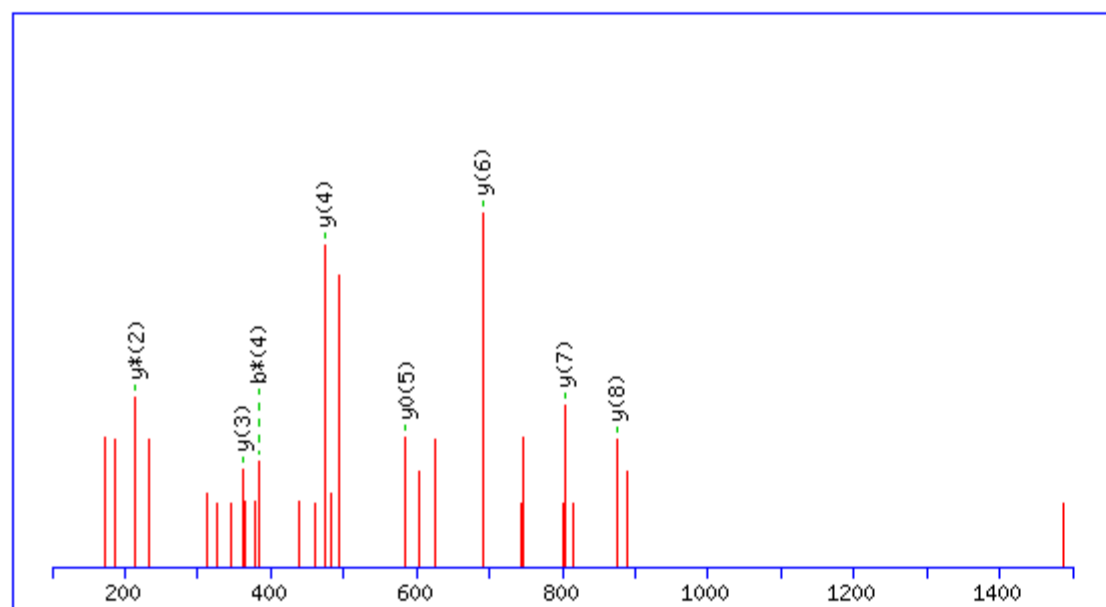

Monoisotopic mass of neutral peptide Mr(calc): 1001.514145

Fixed modifications: Carbamidomethyl (C) (apply to specified residues or termini only)

Ions Score: 44 Expect: 0.00034

Matches : 8/86 fragment ions using 8 most intense peaks ([help](#))

| # | b          | b <sup>++</sup> | b <sup>*</sup>    | b <sup>*++</sup> | b <sup>0</sup> | b <sup>0++</sup> | Seq. | y                 | y <sup>++</sup> | y <sup>*</sup>    | y <sup>*++</sup> | y <sup>0</sup>    | y <sup>0++</sup> | # |
|---|------------|-----------------|-------------------|------------------|----------------|------------------|------|-------------------|-----------------|-------------------|------------------|-------------------|------------------|---|
| 1 | 129.065854 | 65.036565       | 112.039305        | 56.523291        |                |                  | Q    |                   |                 |                   |                  |                   |                  | 9 |
| 2 | 200.102968 | 100.555122      | 183.076419        | 92.041848        |                |                  | A    | <b>874.462872</b> | 437.735074      | 857.436323        | 429.221800       | 856.452307        | 428.729792       | 8 |
| 3 | 313.187032 | 157.097154      | 296.160483        | 148.583879       |                |                  | L    | <b>803.425758</b> | 402.216517      | 786.399209        | 393.703243       | 785.415193        | 393.211235       | 7 |
| 4 | 400.219060 | 200.613168      | <b>383.192511</b> | 192.099893       | 382.208495     | 191.607885       | S    | <b>690.341694</b> | 345.674485      | 673.315145        | 337.161211       | 672.331129        | 336.669203       | 6 |
| 5 | 529.261653 | 265.134465      | 512.235104        | 256.621190       | 511.251088     | 256.129182       | E    | 603.309666        | 302.158471      | 586.283117        | 293.645197       | <b>585.299101</b> | 293.153189       | 5 |
| 6 | 642.345717 | 321.676497      | 625.319168        | 313.163222       | 624.335152     | 312.671214       | I    | <b>474.267073</b> | 237.637175      | 457.240524        | 229.123900       | 456.256508        | 228.631892       | 4 |
| 7 | 771.388310 | 386.197793      | 754.361761        | 377.684519       | 753.377745     | 377.192511       | E    | <b>361.183009</b> | 181.095143      | 344.156460        | 172.581868       | 343.172444        | 172.089860       | 3 |
| 8 | 828.409774 | 414.708525      | 811.383225        | 406.195251       | 810.399209     | 405.703243       | G    | 232.140416        | 116.573846      | <b>215.113867</b> | 108.060572       |                   |                  | 2 |
| 9 |            |                 |                   |                  |                |                  | R    | 175.118952        | 88.063114       | 158.092403        | 79.549840        |                   |                  | 1 |

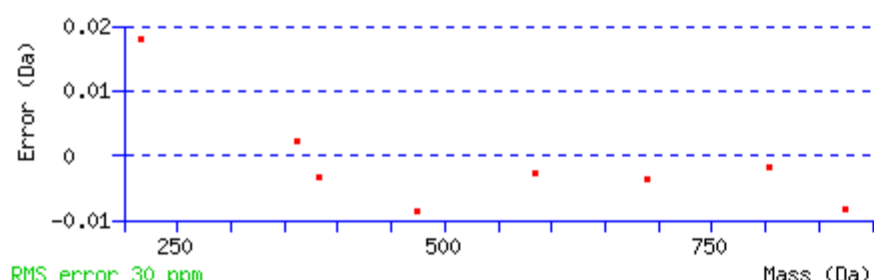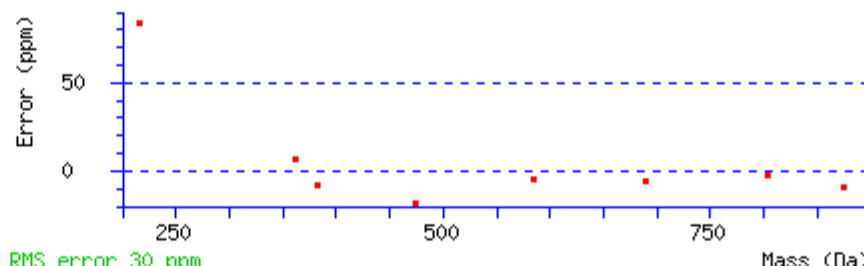

NCBI BLAST search of **QALSEIEGR**

(Parameters: blastp, nr protein database, expect=20000, no filter, PAM30)

Other BLAST [web gateways](#)

## All matches to this query

| Score | Mr(calc):   | Delta     | Sequence                   |
|-------|-------------|-----------|----------------------------|
| 44.0  | 1001.514145 | -0.000637 | <a href="#">QALSEIEGR</a>  |
| 6.6   | 1001.521545 | -0.008037 | <a href="#">KAPQSLEVM</a>  |
| 1.1   | 1001.503799 | 0.009709  | <a href="#">SVATLLMHM</a>  |
| 0.5   | 1001.514145 | -0.000637 | <a href="#">AALSDAELGR</a> |
| 0.1   | 1001.514145 | -0.000637 | <a href="#">KSPLAEEGR</a>  |

Mascot: <http://www.matrixscience.com/>

# **MASCOT** Mascot Search Results

## Peptide View

MS/MS Fragmentation of **ADTPSLGEGPEK**

Found in **STXB2\_HUMAN**, Syntaxin-binding protein 2 OS=Homo sapiens GN=STXBP2 PE=1 SV=2

Match to Query 519922: 1199.569668 from(600.792110,2+) rtinseconds(1486) index(252851)

Title: Locus:1.1.1.1011.24

Data file C:\Program Files (x86)\Matrix Science\Mascot Daemon\mgf3 TFD - Epitel - R2\mascot\_daemon\_merge.mgf

Click mouse within plot area to zoom in by factor of two about that point

Or, Plot from  to  Da

Label all possible matches  Label matches used for scoring

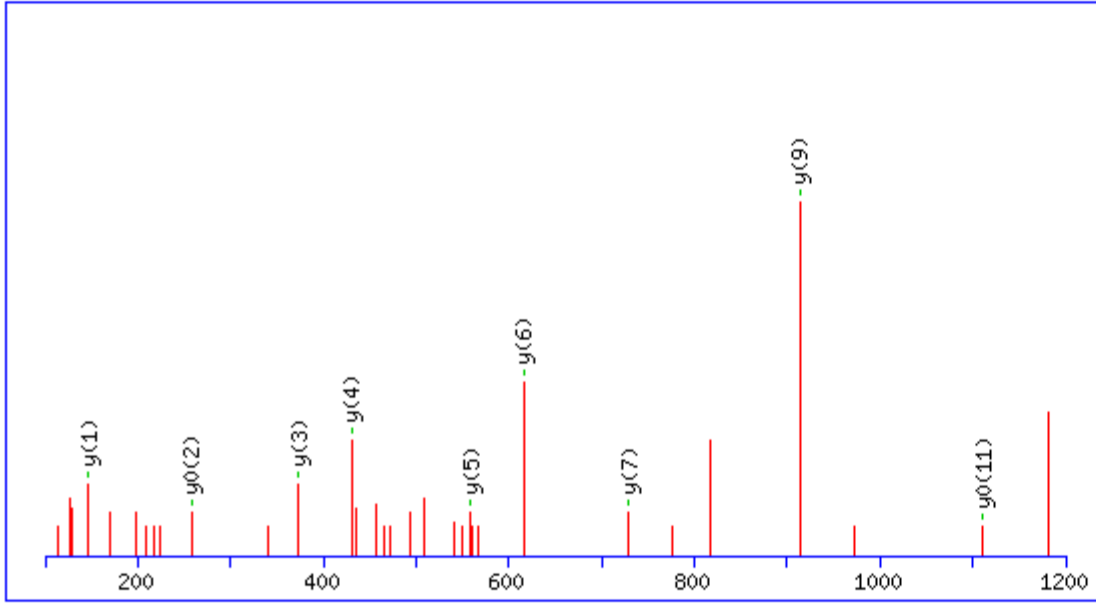

Monoisotopic mass of neutral peptide  $M_r(\text{calc})$ : 1199.566986

Fixed modifications: Carbamidomethyl (C) (apply to specified residues or termini only)

Ions Score: 68 Expect: 1.7e-006

Matches : 9/106 fragment ions using 11 most intense peaks ([help](#))

| #  | b           | b <sup>++</sup> | b <sup>0</sup> | b <sup>0++</sup> | Seq. | y           | y <sup>++</sup> | y <sup>*</sup> | y <sup>*++</sup> | y <sup>0</sup> | y <sup>0++</sup> | #  |
|----|-------------|-----------------|----------------|------------------|------|-------------|-----------------|----------------|------------------|----------------|------------------|----|
| 1  | 72.044390   | 36.525833       |                |                  | A    |             |                 |                |                  |                |                  | 12 |
| 2  | 187.071333  | 94.039304       | 169.060768     | 85.034022        | D    | 1129.537160 | 565.272218      | 1112.510611    | 556.758944       | 1111.526595    | 556.266936       | 11 |
| 3  | 288.119012  | 144.563144      | 270.108447     | 135.557862       | T    | 1014.510217 | 507.758747      | 997.483668     | 499.245472       | 996.499652     | 498.753464       | 10 |
| 4  | 385.171776  | 193.089526      | 367.161211     | 184.084243       | P    | 913.462538  | 457.234907      | 896.435989     | 448.721633       | 895.451973     | 448.229625       | 9  |
| 5  | 472.203804  | 236.605540      | 454.193239     | 227.600257       | S    | 816.409774  | 408.708525      | 799.383225     | 400.195251       | 798.399209     | 399.703243       | 8  |
| 6  | 585.287868  | 293.147572      | 567.277303     | 284.142290       | L    | 729.377746  | 365.192511      | 712.351197     | 356.679237       | 711.367181     | 356.187229       | 7  |
| 7  | 642.309332  | 321.658304      | 624.298767     | 312.653022       | G    | 616.293682  | 308.650479      | 599.267133     | 300.137205       | 598.283117     | 299.645197       | 6  |
| 8  | 771.351925  | 386.179601      | 753.341360     | 377.174318       | E    | 559.272218  | 280.139747      | 542.245669     | 271.626473       | 541.261653     | 271.134465       | 5  |
| 9  | 828.373389  | 414.690333      | 810.362824     | 405.685050       | G    | 430.229625  | 215.618451      | 413.203076     | 207.105176       | 412.219060     | 206.613168       | 4  |
| 10 | 925.426153  | 463.216715      | 907.415588     | 454.211432       | P    | 373.208161  | 187.107719      | 356.181612     | 178.594444       | 355.197596     | 178.102436       | 3  |
| 11 | 1054.468746 | 527.738011      | 1036.458181    | 518.732729       | E    | 276.155397  | 138.581337      | 259.128848     | 130.068062       | 258.144832     | 129.576054       | 2  |
| 12 |             |                 |                |                  | K    | 147.112804  | 74.060040       | 130.086255     | 65.546765        |                |                  | 1  |

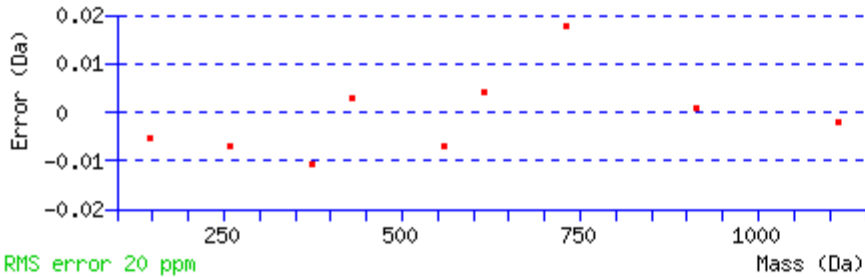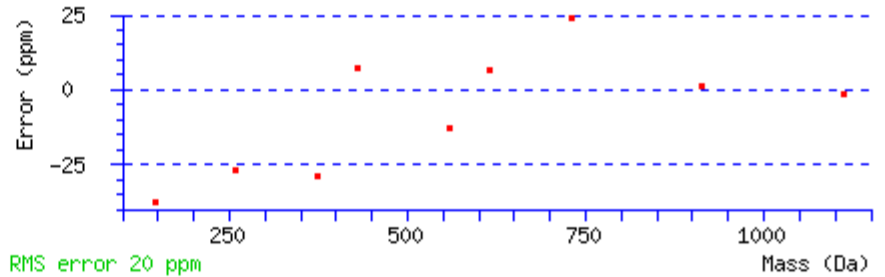

NCBI BLAST search of **ADTPSLGEGPEK**

(Parameters: blastp, nr protein database, expect=20000, no filter, PAM30)

Other BLAST [web gateways](#)

## All matches to this query

| Score | $M_r(\text{calc})$ : | Delta     | Sequence                     |
|-------|----------------------|-----------|------------------------------|
| 68.1  | 1199.566986          | 0.002682  | <a href="#">ADTPSLGEGPEK</a> |
| 10.3  | 1199.578217          | -0.008549 | <a href="#">INDEPVSAAPR</a>  |
| 8.5   | 1199.578217          | -0.008549 | <a href="#">GEAPGAETPSLR</a> |
| 8.3   | 1199.578201          | -0.008533 | <a href="#">EAASSPAGEPLR</a> |
| 7.2   | 1199.578217          | -0.008549 | <a href="#">EEDRAGLGPPK</a>  |
| 6.9   | 1199.567001          | 0.002667  | <a href="#">VPEPEGQTSPK</a>  |
| 3.3   | 1199.578217          | -0.008549 | <a href="#">GNVLNSPEDQK</a>  |
| 0.8   | 1199.578232          | -0.008564 | <a href="#">SSPQPQQTSPK</a>  |
| 0.7   | 1199.571701          | -0.002033 | <a href="#">PGMGINTQNPR</a>  |
| 0.1   | 1199.567001          | 0.002667  | <a href="#">VGPDEDKPPSK</a>  |



# Mascot Search Results

## Peptide View

MS/MS Fragmentation of **FGDQLLQIDGR**

Found in **SDCB2\_HUMAN**, Syntenin-2 OS=Homo sapiens GN=SDCBP2 PE=2 SV=2

Match to Query 33568: 1260.649488 from(631.332020,2+) rtinseconds(2777) index(36714)

Title: Locus:1.1.1.2472.28

Data file 2011-11-12 - TFD - EP 5-4.mgf

Click mouse within plot area to zoom in by factor of two about that point

Or, Plot from  to  Da

Label all possible matches  Label matches used for scoring

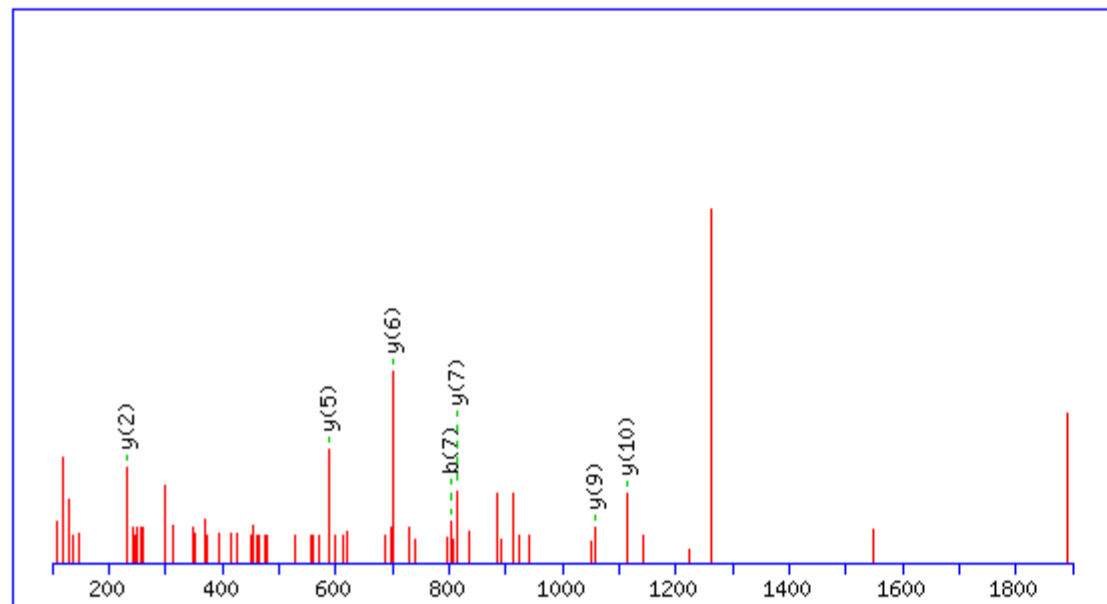

Monoisotopic mass of neutral peptide Mr(calc): 1260.646255

Fixed modifications: Propionamide (C) (apply to specified residues or termini only)

Ions Score: 35 Expect: 0.0022

Matches : 7/106 fragment ions using 12 most intense peaks ([help](#))

| #  | b                 | b <sup>++</sup> | b <sup>*</sup> | b <sup>+++</sup> | b <sup>0</sup> | b <sup>0++</sup> | Seq. | y                  | y <sup>++</sup> | y <sup>*</sup> | y <sup>+++</sup> | y <sup>0</sup> | y <sup>0++</sup> | #  |
|----|-------------------|-----------------|----------------|------------------|----------------|------------------|------|--------------------|-----------------|----------------|------------------|----------------|------------------|----|
| 1  | 148.075690        | 74.541483       |                |                  |                |                  | F    |                    |                 |                |                  |                |                  | 11 |
| 2  | 205.097154        | 103.052215      |                |                  |                |                  | G    | <b>1114.585114</b> | 557.796195      | 1097.558565    | 549.282921       | 1096.574549    | 548.790912       | 10 |
| 3  | 320.124097        | 160.565687      |                |                  | 302.113532     | 151.560404       | D    | <b>1057.563650</b> | 529.285463      | 1040.537101    | 520.772189       | 1039.553085    | 520.280181       | 9  |
| 4  | 448.182675        | 224.594976      | 431.156126     | 216.081701       | 430.172110     | 215.589693       | Q    | 942.536707         | 471.771992      | 925.510158     | 463.258717       | 924.526142     | 462.766709       | 8  |
| 5  | 561.266739        | 281.137008      | 544.240190     | 272.623733       | 543.256174     | 272.131725       | L    | <b>814.478129</b>  | 407.742703      | 797.451580     | 399.229428       | 796.467564     | 398.737420       | 7  |
| 6  | 674.350803        | 337.679040      | 657.324254     | 329.165765       | 656.340238     | 328.673757       | L    | <b>701.394065</b>  | 351.200671      | 684.367516     | 342.687396       | 683.383500     | 342.195388       | 6  |
| 7  | <b>802.409381</b> | 401.708329      | 785.382832     | 393.195054       | 784.398816     | 392.703046       | Q    | <b>588.310001</b>  | 294.658639      | 571.283452     | 286.145364       | 570.299436     | 285.653356       | 5  |
| 8  | 915.493445        | 458.250361      | 898.466896     | 449.737086       | 897.482880     | 449.245078       | I    | 460.251423         | 230.629349      | 443.224874     | 222.116075       | 442.240858     | 221.624067       | 4  |
| 9  | 1030.520388       | 515.763832      | 1013.493839    | 507.250558       | 1012.509823    | 506.758550       | D    | 347.167359         | 174.087317      | 330.140810     | 165.574043       | 329.156794     | 165.082035       | 3  |
| 10 | 1087.541852       | 544.274564      | 1070.515303    | 535.761290       | 1069.531287    | 535.269282       | G    | <b>232.140416</b>  | 116.573846      | 215.113867     | 108.060571       |                |                  | 2  |
| 11 |                   |                 |                |                  |                |                  | R    | 175.118952         | 88.063114       | 158.092403     | 79.549839        |                |                  | 1  |

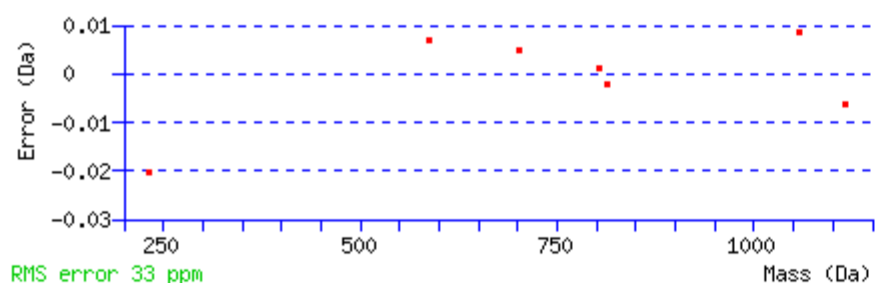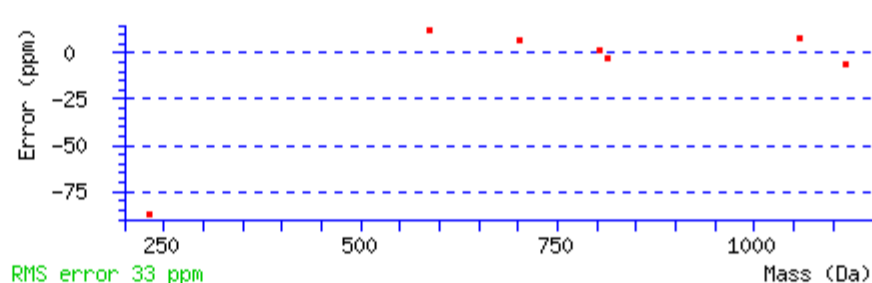

NCBI BLAST search of **FGDQLLQIDGR**

(Parameters: blastp, nr protein database, expect=20000, no filter, PAM30)

Other BLAST [web gateways](#)

All matches to this query

| Score | Mr(calc):   | Delta    | Sequence                    |
|-------|-------------|----------|-----------------------------|
| 35.0  | 1260.646255 | 0.003233 | <a href="#">FGDQLLQIDGR</a> |
| 6.7   | 1260.646255 | 0.003233 | <a href="#">KFLGDLQPDGR</a> |

Mascot: <http://www.matrixscience.com/>

# Mascot Search Results

## Peptide View

MS/MS Fragmentation of **VLNLIQSWADAFR**

Found in **TOM1\_HUMAN**, Target of Myb protein 1 OS=Homo sapiens GN=TOM1 PE=1 SV=2

Match to Query 47250: 1531.826368 from(766.920460,2+) rtinseconds(4563) index(69268)

Title: Locus:1.1.1.3158.16

Data file 2011-11-14 - TFD - EP 8-3.mgf

Click mouse within plot area to zoom in by factor of two about that point

Or, Plot from  to  Da

Label all possible matches  Label matches used for scoring

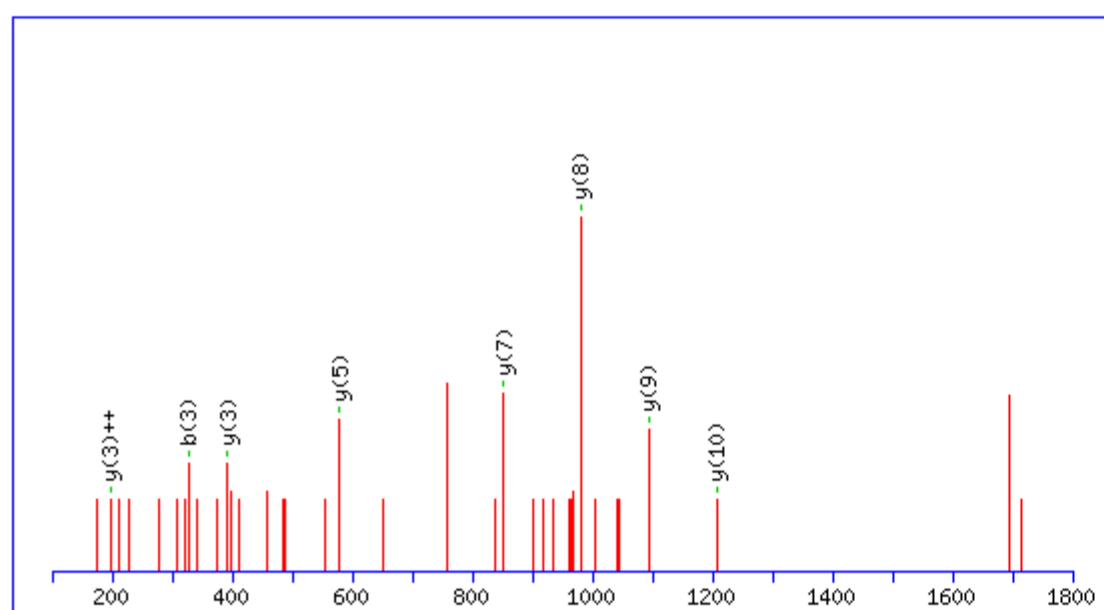

Monoisotopic mass of neutral peptide Mr(calc): 1531.814697

Fixed modifications: Propionamide (C) (apply to specified residues or termini only)

Ions Score: 41 Expect: 0.00081

Matches : 8/122 fragment ions using 11 most intense peaks ([help](#))

| #  | b                 | b <sup>++</sup> | b <sup>*</sup> | b <sup>*++</sup> | b <sup>0</sup> | b <sup>0++</sup> | Seq. | y                  | y <sup>++</sup>   | y <sup>*</sup> | y <sup>*++</sup> | y <sup>0</sup> | y <sup>0++</sup> | #  |
|----|-------------------|-----------------|----------------|------------------|----------------|------------------|------|--------------------|-------------------|----------------|------------------|----------------|------------------|----|
| 1  | 100.075690        | 50.541483       |                |                  |                |                  | V    |                    |                   |                |                  |                |                  | 13 |
| 2  | 213.159754        | 107.083515      |                |                  |                |                  | L    | 1433.753575        | 717.380426        | 1416.727026    | 708.867151       | 1415.743010    | 708.375143       | 12 |
| 3  | <b>327.202681</b> | 164.104978      | 310.176132     | 155.591704       |                |                  | N    | 1320.669511        | 660.838394        | 1303.642962    | 652.325119       | 1302.658946    | 651.833111       | 11 |
| 4  | 440.286745        | 220.647010      | 423.260196     | 212.133736       |                |                  | L    | <b>1206.626584</b> | 603.816930        | 1189.600035    | 595.303656       | 1188.616019    | 594.811648       | 10 |
| 5  | 553.370809        | 277.189043      | 536.344260     | 268.675768       |                |                  | I    | <b>1093.542520</b> | 547.274898        | 1076.515971    | 538.761624       | 1075.531955    | 538.269615       | 9  |
| 6  | 681.429387        | 341.218332      | 664.402838     | 332.705057       |                |                  | Q    | <b>980.458456</b>  | 490.732866        | 963.431907     | 482.219592       | 962.447891     | 481.727584       | 8  |
| 7  | 768.461415        | 384.734346      | 751.434866     | 376.221071       | 750.450850     | 375.729063       | S    | <b>852.399878</b>  | 426.703577        | 835.373329     | 418.190303       | 834.389313     | 417.698295       | 7  |
| 8  | 954.540728        | 477.774002      | 937.514179     | 469.260727       | 936.530163     | 468.768719       | W    | 765.367850         | 383.187563        | 748.341301     | 374.674289       | 747.357285     | 374.182281       | 6  |
| 9  | 1025.577842       | 513.292559      | 1008.551293    | 504.779284       | 1007.567277    | 504.287276       | A    | <b>579.288537</b>  | 290.147907        | 562.261988     | 281.634632       | 561.277972     | 281.142624       | 5  |
| 10 | 1140.604785       | 570.806031      | 1123.578236    | 562.292756       | 1122.594220    | 561.800748       | D    | 508.251423         | 254.629350        | 491.224874     | 246.116075       | 490.240858     | 245.624067       | 4  |
| 11 | 1211.641899       | 606.324588      | 1194.615350    | 597.811313       | 1193.631334    | 597.319305       | A    | <b>393.224480</b>  | <b>197.115878</b> | 376.197931     | 188.602603       |                |                  | 3  |
| 12 | 1358.710313       | 679.858795      | 1341.683764    | 671.345520       | 1340.699748    | 670.853512       | F    | 322.187366         | 161.597321        | 305.160817     | 153.084047       |                |                  | 2  |
| 13 |                   |                 |                |                  |                |                  | R    | 175.118952         | 88.063114         | 158.092403     | 79.549839        |                |                  | 1  |

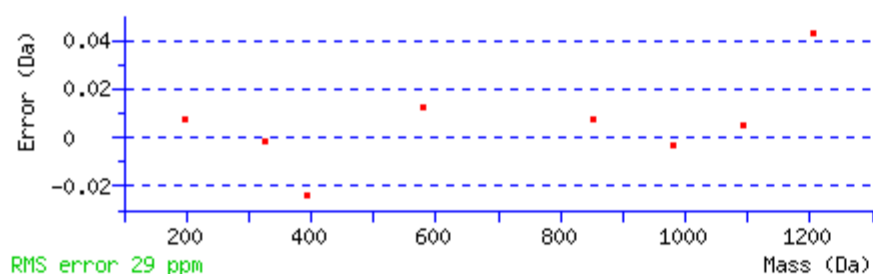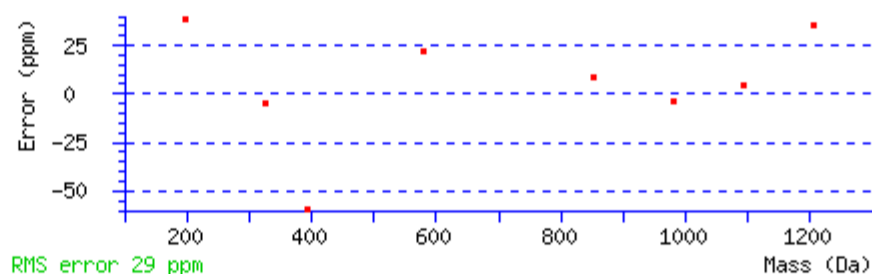

NCBI BLAST search of [VLNLIQSWADAFR](#)

(Parameters: blastp, nr protein database, expect=20000, no filter, PAM30)

Other BLAST [web gateways](#)

All matches to this query

| Score | Mr(calc):   | Delta    | Sequence                         |
|-------|-------------|----------|----------------------------------|
| 40.6  | 1531.814697 | 0.011671 | <a href="#">VLNLIQSWADAFR</a>    |
| 7.2   | 1531.814697 | 0.011671 | <a href="#">APAAPAAPPPPPPPPR</a> |

# MATRIX SCIENCE Mascot Search Results

## Peptide View

MS/MS Fragmentation of **VSEGGPAEIALGLQIGDK**

Found in **TX1B3\_HUMAN**, Tax1-binding protein 3 OS=Homo sapiens GN=TAX1BP3 PE=1 SV=2

Match to Query 41263: 1639.836048 from(820.925300,2+) rtinseconds(2709) index(27167)

Title: Locus:1.1.1.2490.48

Data file 2011-11-10 - TFD - EP 4-7.mgf

Click mouse within plot area to zoom in by factor of two about that point

Or, Plot from  to  Da

Label all possible matches  Label matches used for scoring

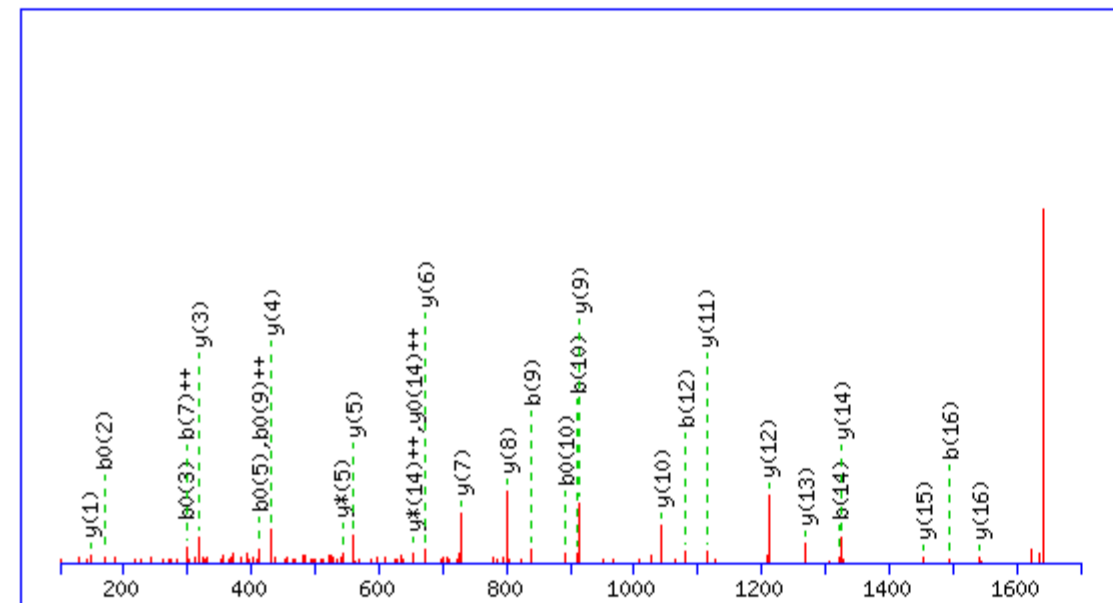

Monoisotopic mass of neutral peptide Mr(calc): 1639.841705

Fixed modifications: Propionamide (C) (apply to specified residues or termini only)

Ions Score: 155 Expect: 3.2e-015

Matches : 29/164 fragment ions using 32 most intense peaks [\(help\)](#)

| #  | b           | b <sup>++</sup> | b <sup>*</sup> | b <sup>*++</sup> | b <sup>0</sup> | b <sup>0++</sup> | Seq. | y           | y <sup>++</sup> | y <sup>*</sup> | y <sup>*++</sup> | y <sup>0</sup> | y <sup>0++</sup> | #  |
|----|-------------|-----------------|----------------|------------------|----------------|------------------|------|-------------|-----------------|----------------|------------------|----------------|------------------|----|
| 1  | 100.075690  | 50.541483       |                |                  |                |                  | V    |             |                 |                |                  |                |                  | 17 |
| 2  | 187.107718  | 94.057497       |                |                  | 169.097153     | 85.052214        | S    | 1541.780579 | 771.393927      | 1524.754030    | 762.880653       | 1523.770014    | 762.388645       | 16 |
| 3  | 316.150311  | 158.578793      |                |                  | 298.139746     | 149.573511       | E    | 1454.748551 | 727.877913      | 1437.722002    | 719.364639       | 1436.737986    | 718.872631       | 15 |
| 4  | 373.171775  | 187.089525      |                |                  | 355.161210     | 178.084243       | G    | 1325.705958 | 663.356617      | 1308.679409    | 654.843342       | 1307.695393    | 654.351334       | 14 |
| 5  | 430.193239  | 215.600257      |                |                  | 412.182674     | 206.594975       | G    | 1268.684494 | 634.845885      | 1251.657945    | 626.332610       | 1250.673929    | 625.840602       | 13 |
| 6  | 527.246003  | 264.126640      |                |                  | 509.235438     | 255.121357       | P    | 1211.663030 | 606.335153      | 1194.636481    | 597.821879       | 1193.652465    | 597.329870       | 12 |
| 7  | 598.283117  | 299.645197      |                |                  | 580.272552     | 290.639914       | A    | 1114.610266 | 557.808771      | 1097.583717    | 549.295497       | 1096.599701    | 548.803488       | 11 |
| 8  | 727.325710  | 364.166493      |                |                  | 709.315145     | 355.161210       | E    | 1043.573152 | 522.290214      | 1026.546603    | 513.776940       | 1025.562587    | 513.284931       | 10 |
| 9  | 840.409774  | 420.708525      |                |                  | 822.399209     | 411.703242       | I    | 914.530559  | 457.768917      | 897.504010     | 449.255643       | 896.519994     | 448.763635       | 9  |
| 10 | 911.446888  | 456.227082      |                |                  | 893.436323     | 447.221799       | A    | 801.446495  | 401.226885      | 784.419946     | 392.713611       | 783.435930     | 392.221603       | 8  |
| 11 | 968.468352  | 484.737814      |                |                  | 950.457787     | 475.732531       | G    | 730.409381  | 365.708328      | 713.382832     | 357.195054       | 712.398816     | 356.703046       | 7  |
| 12 | 1081.552416 | 541.279846      |                |                  | 1063.541851    | 532.274564       | L    | 673.387917  | 337.197596      | 656.361368     | 328.684322       | 655.377352     | 328.192314       | 6  |
| 13 | 1209.610994 | 605.309135      | 1192.584445    | 596.795861       | 1191.600429    | 596.303852       | Q    | 560.303853  | 280.655564      | 543.277304     | 272.142290       | 542.293288     | 271.650282       | 5  |
| 14 | 1322.695058 | 661.851167      | 1305.668509    | 653.337892       | 1304.684493    | 652.845884       | I    | 432.245275  | 216.626275      | 415.218726     | 208.113001       | 414.234710     | 207.620993       | 4  |
| 15 | 1379.716522 | 690.361899      | 1362.689973    | 681.848624       | 1361.705957    | 681.356616       | G    | 319.161211  | 160.084243      | 302.134662     | 151.570969       | 301.150646     | 151.078961       | 3  |
| 16 | 1494.743465 | 747.875370      | 1477.716916    | 739.362096       | 1476.732900    | 738.870088       | D    | 262.139747  | 131.573512      | 245.113198     | 123.060237       | 244.129182     | 122.568229       | 2  |
| 17 |             |                 |                |                  |                |                  | K    | 147.112804  | 74.060040       | 130.086255     | 65.546765        |                |                  | 1  |

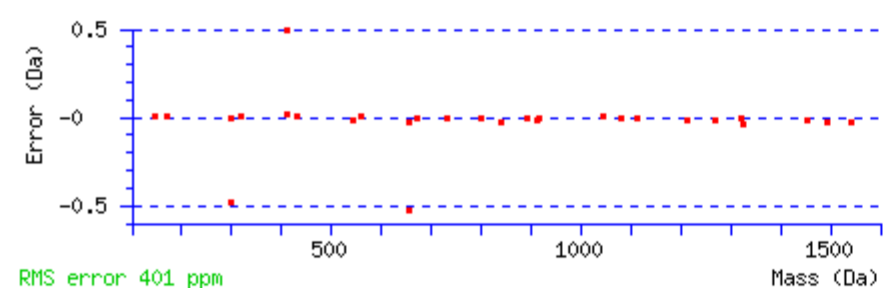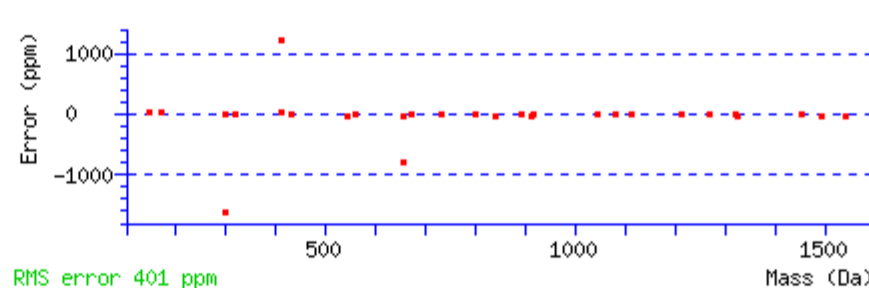

NCBI BLAST search of **VSEGGPAEIALGLQIGDK**

(Parameters: blastp, nr protein database, expect=20000, no filter, PAM30)

Other BLAST [web gateways](#)

All matches to this query

| Score | Mr(calc):   | Delta     | Sequence                           |
|-------|-------------|-----------|------------------------------------|
| 155.5 | 1639.841705 | -0.005657 | <a href="#">VSEGGPAEIALGLQIGDK</a> |
| 3.8   | 1639.820572 | 0.015476  | <a href="#">LSDGSAYRFEVPTAK</a>    |
| 2.8   | 1639.831818 | 0.004230  | <a href="#">GQHLSDAFAQVNPLK</a>    |

Mascot: <http://www.matrixscience.com/>

# MASCOT Search Results

## Peptide View

### MS/MS Fragmentation of **LSVEDVLTR**

Found in **TBC17\_HUMAN**, TBC1 domain family member 17 OS=Homo sapiens GN=TBC1D17 PE=2 SV=2

Match to Query 18752: 1030.560228 from(516.287390,2+) rtinseconds(2775) index(36270)

Title: Locus:1.1.1.2545.10

Data file 2011-11-10 - TFD - EP 4-2.mgf

Click mouse within plot area to zoom in by factor of two about that point

Or, Plot from  to  Da

Label all possible matches  Label matches used for scoring

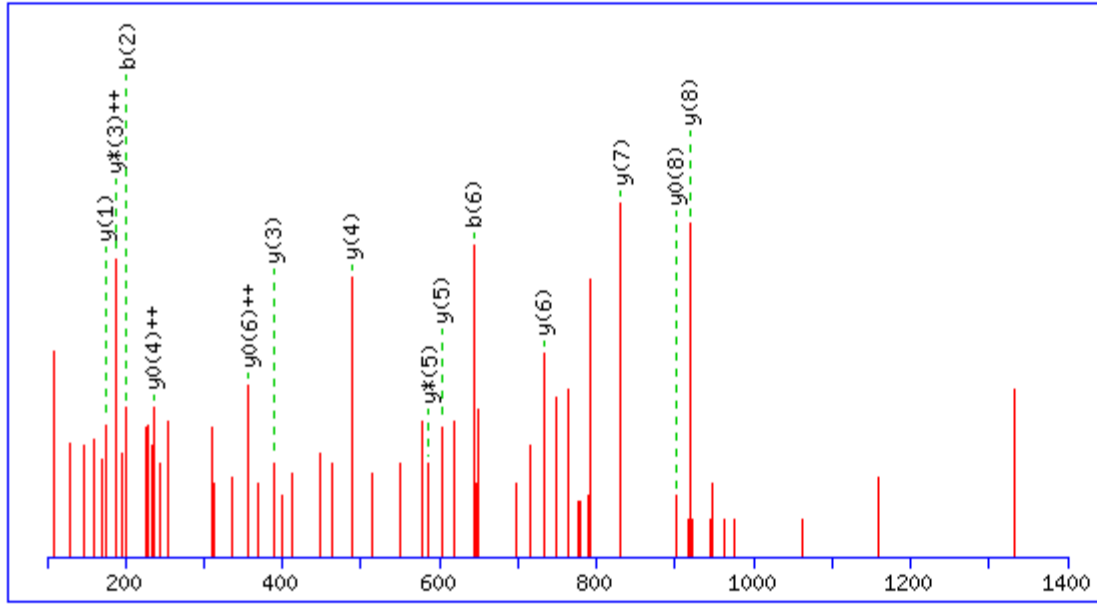

Monoisotopic mass of neutral peptide Mr(calc): 1030.565872

Fixed modifications: Propionamide (C) (apply to specified residues or termini only)

Ions Score: 36 Expect: 0.001

Matches : 14/76 fragment ions using 34 most intense peaks [\(help\)](#)

| # | b                 | b <sup>++</sup> | b <sup>0</sup> | b <sup>0++</sup> | Seq. | y                 | y <sup>++</sup> | y <sup>*</sup>    | y <sup>*++</sup>  | y <sup>0</sup>    | y <sup>0++</sup>  | # |
|---|-------------------|-----------------|----------------|------------------|------|-------------------|-----------------|-------------------|-------------------|-------------------|-------------------|---|
| 1 | 114.091340        | 57.549308       |                |                  | L    |                   |                 |                   |                   |                   |                   | 9 |
| 2 | <b>201.123368</b> | 101.065322      | 183.112803     | 92.060039        | S    | <b>918.489087</b> | 459.748182      | 901.462538        | 451.234907        | <b>900.478522</b> | 450.742899        | 8 |
| 3 | 300.191782        | 150.599529      | 282.181217     | 141.594247       | V    | <b>831.457059</b> | 416.232168      | 814.430510        | 407.718893        | 813.446494        | 407.226885        | 7 |
| 4 | 429.234375        | 215.120826      | 411.223810     | 206.115543       | E    | <b>732.388645</b> | 366.697961      | 715.362096        | 358.184686        | 714.378080        | <b>357.692678</b> | 6 |
| 5 | 544.261318        | 272.634297      | 526.250753     | 263.629015       | D    | <b>603.346052</b> | 302.176664      | <b>586.319503</b> | 293.663390        | 585.335487        | 293.171382        | 5 |
| 6 | <b>643.329732</b> | 322.168504      | 625.319167     | 313.163222       | V    | <b>488.319109</b> | 244.663192      | 471.292560        | 236.149918        | 470.308544        | <b>235.657910</b> | 4 |
| 7 | 756.413796        | 378.710536      | 738.403231     | 369.705254       | L    | <b>389.250695</b> | 195.128985      | 372.224146        | <b>186.615711</b> | 371.240130        | 186.123703        | 3 |
| 8 | 857.461475        | 429.234376      | 839.450910     | 420.229093       | T    | 276.166631        | 138.586953      | 259.140082        | 130.073679        | 258.156066        | 129.581671        | 2 |
| 9 |                   |                 |                |                  | R    | <b>175.118952</b> | 88.063114       | 158.092403        | 79.549839         |                   |                   | 1 |

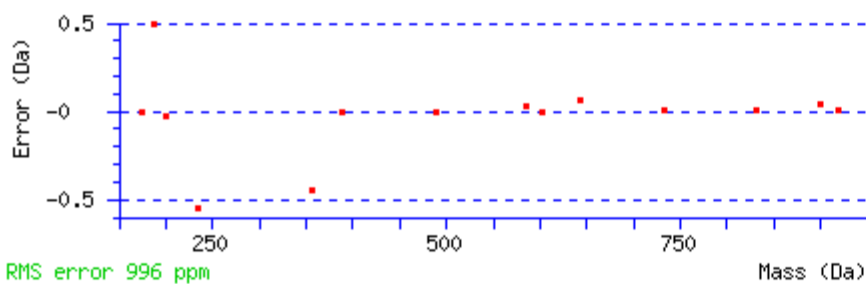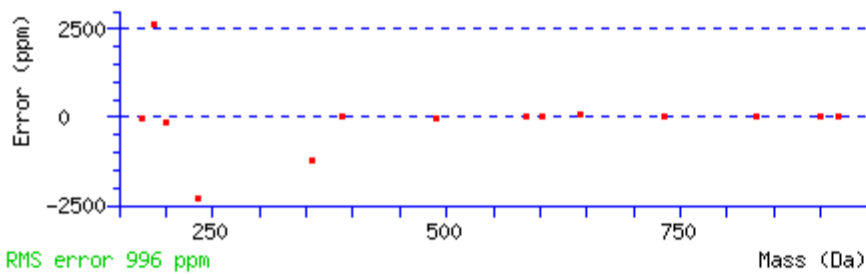

### NCBI BLAST search of **LSVEDVLTR**

(Parameters: blastp, nr protein database, expect=20000, no filter, PAM30)

Other BLAST [web gateways](#)

### All matches to this query

| Score | Mr(calc):   | Delta     | Sequence                   |
|-------|-------------|-----------|----------------------------|
| 35.8  | 1030.565872 | -0.005644 | <a href="#">LSVEDVLTR</a>  |
| 3.8   | 1030.559341 | 0.000887  | <a href="#">IGAGRLMGPK</a> |
| 3.6   | 1030.554626 | 0.005602  | <a href="#">LSDLLEVVDK</a> |
| 2.7   | 1030.565842 | -0.005614 | <a href="#">LSQNISELK</a>  |
| 2.7   | 1030.555969 | 0.004259  | <a href="#">SLVHAYVSR</a>  |

**Peptide View**

MS/MS Fragmentation of **TPPGLVGVAALQFPALQNISLK**  
 Found in **TBD2A\_HUMAN**, TBC1 domain family member 2A OS=Homo sapiens GN=TBC1D2 PE=1 SV=3

Match to Query 70396: 2401.376292 from(801.466040,3+) rtinseconds(4420) index(67225)  
 Title: Locus:1.1.1.2976.21  
 Data file 2011-11-12 - TFD - EP 6-1.mgf

Click mouse within plot area to zoom in by factor of two about that point  
 Or, Plot from  to  Da   
 Label all possible matches  Label matches used for scoring

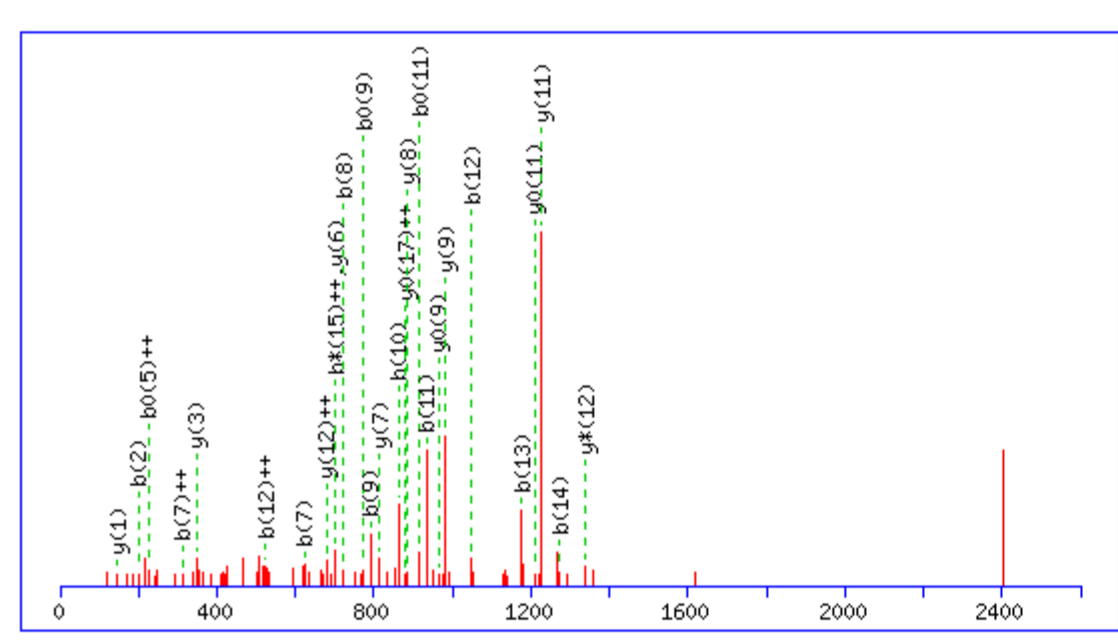

Monoisotopic mass of neutral peptide Mr(calc): 2401.373306  
 Fixed modifications: Propionamide (C) (apply to specified residues or termini only)  
 Ions Score: 36 Expect: 0.00033  
 Matches : 27/248 fragment ions using 70 most intense peaks [\(help\)](#)

| #  | b                  | b <sup>++</sup>   | b <sup>*</sup> | b <sup>***</sup>  | b <sup>0</sup>    | b <sup>0++</sup>  | Seq. | y                  | y <sup>++</sup>   | y <sup>*</sup>     | y <sup>***</sup> | y <sup>0</sup>     | y <sup>0++</sup>  | #  |
|----|--------------------|-------------------|----------------|-------------------|-------------------|-------------------|------|--------------------|-------------------|--------------------|------------------|--------------------|-------------------|----|
| 1  | 102.054955         | 51.531116         |                |                   | 84.044390         | 42.525833         | T    |                    |                   |                    |                  |                    |                   | 24 |
| 2  | <b>199.107719</b>  | 100.057497        |                |                   | 181.097154        | 91.052215         | P    | 2301.332917        | 1151.170096       | 2284.306368        | 1142.656822      | 2283.322352        | 1142.164814       | 23 |
| 3  | 296.160483         | 148.583879        |                |                   | 278.149918        | 139.578597        | P    | 2204.280153        | 1102.643714       | 2187.253604        | 1094.130440      | 2186.269588        | 1093.638432       | 22 |
| 4  | 353.181947         | 177.094611        |                |                   | 335.171382        | 168.089329        | G    | 2107.227389        | 1054.117332       | 2090.200840        | 1045.604058      | 2089.216824        | 1045.112050       | 21 |
| 5  | 466.266011         | 233.636643        |                |                   | 448.255446        | <b>224.631361</b> | L    | 2050.205925        | 1025.606600       | 2033.179376        | 1017.093326      | 2032.195360        | 1016.601318       | 20 |
| 6  | 565.334425         | 283.170851        |                |                   | 547.323860        | 274.165568        | V    | 1937.121861        | 969.064569        | 1920.095312        | 960.551294       | 1919.111296        | 960.059286        | 19 |
| 7  | <b>622.355889</b>  | <b>311.681583</b> |                |                   | 604.345324        | 302.676300        | G    | 1838.053447        | 919.530362        | 1821.026898        | 911.017087       | 1820.042882        | 910.525079        | 18 |
| 8  | <b>721.424303</b>  | 361.215790        |                |                   | 703.413738        | 352.210507        | V    | 1781.031983        | 891.019630        | 1764.005434        | 882.506355       | 1763.021418        | <b>882.014347</b> | 17 |
| 9  | <b>792.461417</b>  | 396.734347        |                |                   | <b>774.450852</b> | 387.729064        | A    | 1681.963569        | 841.485423        | 1664.937020        | 832.972148       | 1663.953004        | 832.480140        | 16 |
| 10 | <b>863.498531</b>  | 432.252904        |                |                   | 845.487966        | 423.247621        | A    | 1610.926455        | 805.966866        | 1593.899906        | 797.453591       | 1592.915890        | 796.961583        | 15 |
| 11 | <b>934.535645</b>  | 467.771460        |                |                   | <b>916.525080</b> | 458.766178        | A    | 1539.889341        | 770.448309        | 1522.862792        | 761.935034       | 1521.878776        | 761.443026        | 14 |
| 12 | <b>1047.619709</b> | <b>524.313492</b> |                |                   | 1029.609144       | 515.308210        | L    | 1468.852227        | 734.929752        | 1451.825678        | 726.416477       | 1450.841662        | 725.924469        | 13 |
| 13 | <b>1175.678287</b> | 588.342782        | 1158.651738    | 579.829507        | 1157.667722       | 579.337499        | Q    | 1355.768163        | <b>678.387720</b> | <b>1338.741614</b> | 669.874445       | 1337.757598        | 669.382437        | 12 |
| 14 | <b>1272.731051</b> | 636.869164        | 1255.704502    | 628.355889        | 1254.720486       | 627.863881        | P    | <b>1227.709585</b> | 614.358431        | 1210.683036        | 605.845156       | <b>1209.699020</b> | 605.353148        | 11 |
| 15 | 1419.799465        | 710.403371        | 1402.772916    | <b>701.890096</b> | 1401.788900       | 701.398088        | F    | 1130.656821        | 565.832049        | 1113.630272        | 557.318774       | 1112.646256        | 556.826766        | 10 |
| 16 | 1516.852229        | 758.929753        | 1499.825680    | 750.416478        | 1498.841664       | 749.924470        | P    | <b>983.588407</b>  | 492.297842        | 966.561858         | 483.784567       | <b>965.577842</b>  | 483.292559        | 9  |
| 17 | 1587.889343        | 794.448310        | 1570.862794    | 785.935035        | 1569.878778       | 785.443027        | A    | <b>886.535643</b>  | 443.771460        | 869.509094         | 435.258185       | 868.525078         | 434.766177        | 8  |
| 18 | 1700.973407        | 850.990342        | 1683.946858    | 842.477067        | 1682.962842       | 841.985059        | L    | <b>815.498529</b>  | 408.252903        | 798.471980         | 399.739628       | 797.487964         | 399.247620        | 7  |
| 19 | 1829.031985        | 915.019630        | 1812.005436    | 906.506356        | 1811.021420       | 906.014348        | Q    | <b>702.414465</b>  | 351.710871        | 685.387916         | 343.197596       | 684.403900         | 342.705588        | 6  |
| 20 | 1943.074912        | 972.041094        | 1926.048363    | 963.527819        | 1925.064347       | 963.035811        | N    | 574.355887         | 287.681582        | 557.329338         | 279.168307       | 556.345322         | 278.676299        | 5  |
| 21 | 2056.158976        | 1028.583126       | 2039.132427    | 1020.069851       | 2038.148411       | 1019.577843       | I    | 460.312960         | 230.660118        | 443.286411         | 222.146844       | 442.302395         | 221.654836        | 4  |
| 22 | 2143.191004        | 1072.099140       | 2126.164455    | 1063.585865       | 2125.180439       | 1063.093857       | S    | <b>347.228896</b>  | 174.118086        | 330.202347         | 165.604812       | 329.218331         | 165.112804        | 3  |
| 23 | 2256.275068        | 1128.641172       | 2239.248519    | 1120.127897       | 2238.264503       | 1119.635889       | L    | 260.196868         | 130.602072        | 243.170319         | 122.088798       |                    |                   | 2  |
| 24 |                    |                   |                |                   |                   |                   | K    | <b>147.112804</b>  | 74.060040         | 130.086255         | 65.546765        |                    |                   | 1  |

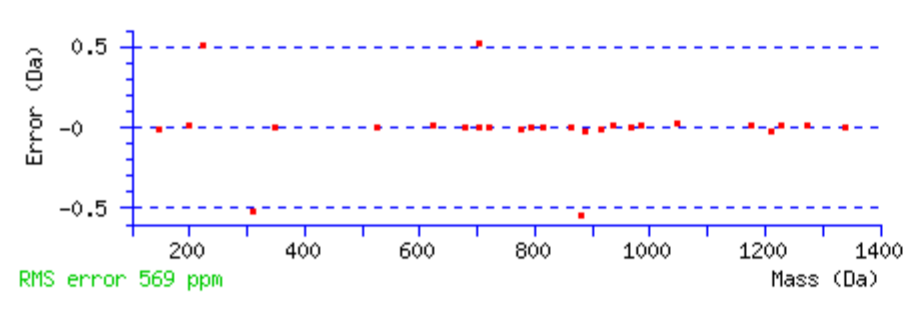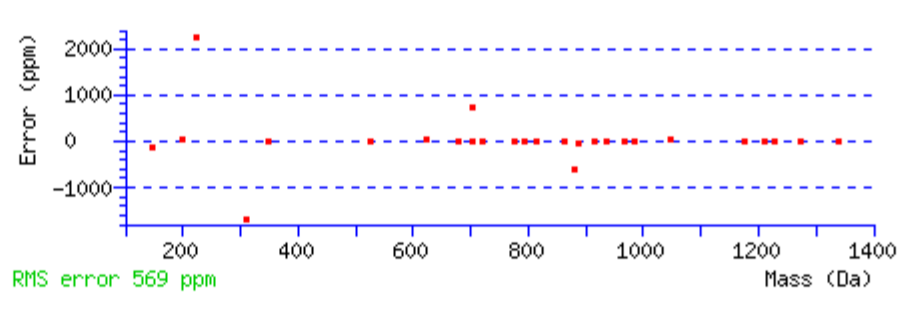

NCBI BLAST search of [TPPGLVGVAALQFPALQNISLK](#)  
 (Parameters: blastp, nr protein database, expect=20000, no filter, PAM30)  
 Other BLAST [web gateways](#)

**All matches to this query**

| Score | Mr(calc):   | Delta    | Sequence                               |
|-------|-------------|----------|----------------------------------------|
| 35.6  | 2401.373306 | 0.002986 | <a href="#">TPPGLVGVAALQFPALQNISLK</a> |

# MASCOT Search Results

## Peptide View

MS/MS Fragmentation of **SPTSAPTQR**

Found in **TENC1\_HUMAN**, Tensin-like C1 domain-containing phosphatase OS=Homo sapiens GN=TENC1 PE=1 SV=2

Match to Query 184468: 943.476508 from(472.745530,2+) rtinseconds(1646) index(748867)

Title: Locus:1.1.1.970.16

Data file C:\Program Files (x86)\Matrix Science\Mascot Daemon\mgf3 TFD - Epitel - R2\mascot\_daemon\_merge.mgf

Click mouse within plot area to zoom in by factor of two about that point

Or, Plot from  to  Da

Label all possible matches  Label matches used for scoring

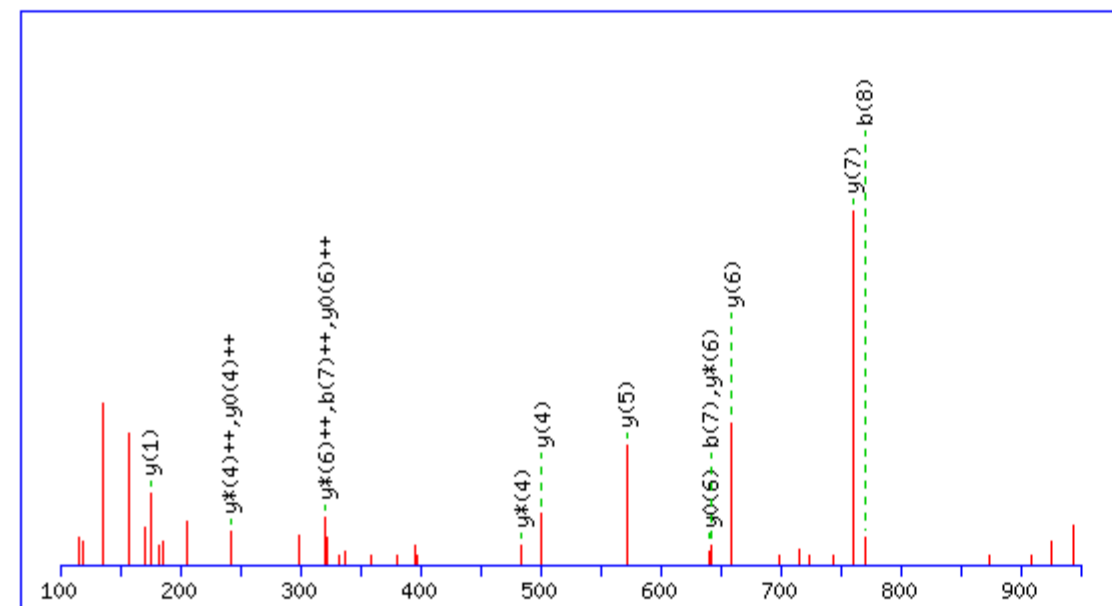

Monoisotopic mass of neutral peptide Mr(calc): 943.472305

Fixed modifications: Carbamidomethyl (C) (apply to specified residues or termini only)

Ions Score: 36 Expect: 0.004

Matches : 15/78 fragment ions using 20 most intense peaks [\(help\)](#)

| # | b                 | b <sup>++</sup>   | b <sup>*</sup> | b <sup>*++</sup> | b <sup>0</sup> | b <sup>0++</sup> | Seq. | y                 | y <sup>++</sup> | y <sup>*</sup>    | y <sup>*++</sup>  | y <sup>0</sup>    | y <sup>0++</sup>  | # |
|---|-------------------|-------------------|----------------|------------------|----------------|------------------|------|-------------------|-----------------|-------------------|-------------------|-------------------|-------------------|---|
| 1 | 88.039304         | 44.523290         |                |                  | 70.028739      | 35.518008        | S    |                   |                 |                   |                   |                   |                   | 9 |
| 2 | 185.092068        | 93.049672         |                |                  | 167.081503     | 84.044389        | P    | 857.447558        | 429.227417      | 840.421009        | 420.714143        | 839.436993        | 420.222135        | 8 |
| 3 | 286.139747        | 143.573512        |                |                  | 268.129182     | 134.568229       | T    | <b>760.394794</b> | 380.701035      | 743.368245        | 372.187761        | 742.384229        | 371.695753        | 7 |
| 4 | 373.171775        | 187.089525        |                |                  | 355.161210     | 178.084243       | S    | <b>659.347115</b> | 330.177196      | <b>642.320566</b> | <b>321.663921</b> | <b>641.336550</b> | <b>321.171913</b> | 6 |
| 5 | 444.208889        | 222.608082        |                |                  | 426.198324     | 213.602800       | A    | <b>572.315087</b> | 286.661182      | 555.288538        | 278.147907        | 554.304522        | 277.655899        | 5 |
| 6 | 541.261653        | 271.134465        |                |                  | 523.251088     | 262.129182       | P    | <b>501.277973</b> | 251.142625      | <b>484.251424</b> | <b>242.629350</b> | 483.267408        | <b>242.137342</b> | 4 |
| 7 | <b>642.309332</b> | <b>321.658304</b> |                |                  | 624.298767     | 312.653022       | T    | 404.225209        | 202.616243      | 387.198660        | 194.102968        | 386.214644        | 193.610960        | 3 |
| 8 | <b>770.367910</b> | 385.687593        | 753.341361     | 377.174319       | 752.357345     | 376.682311       | Q    | 303.177530        | 152.092403      | 286.150981        | 143.579129        |                   |                   | 2 |
| 9 |                   |                   |                |                  |                |                  | R    | <b>175.118952</b> | 88.063114       | 158.092403        | 79.549840         |                   |                   | 1 |

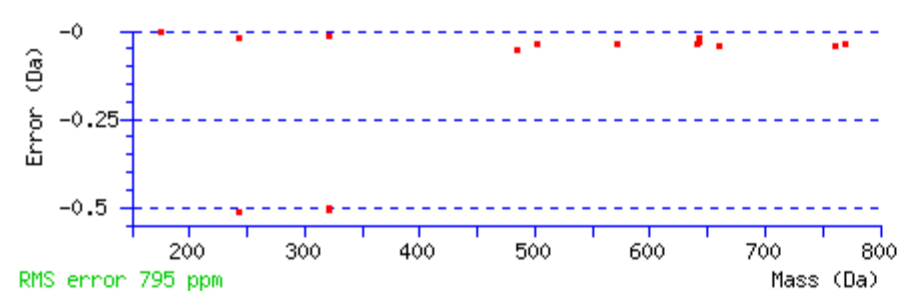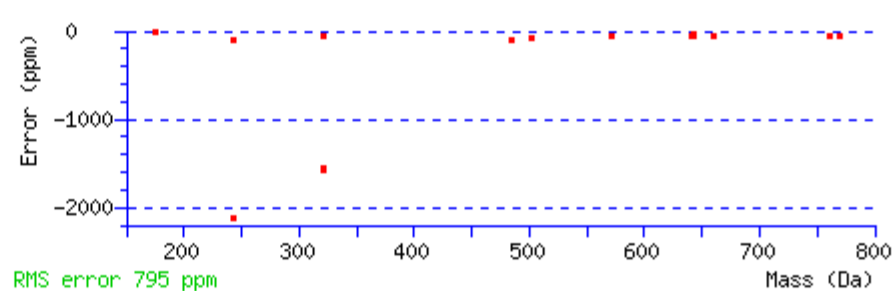

NCBI BLAST search of **SPTSAPTQR**

(Parameters: blastp, nr protein database, expect=20000, no filter, PAM30)

Other BLAST [web gateways](#)

## All matches to this query

| Score | Mr(calc):  | Delta     | Sequence                  |
|-------|------------|-----------|---------------------------|
| 52.4  | 943.476303 | 0.000205  | <a href="#">AITSAYYR</a>  |
| 36.0  | 943.472305 | 0.004203  | <a href="#">SPTSAPTQR</a> |
| 13.9  | 943.472305 | 0.004203  | <a href="#">SPPGPASKR</a> |
| 13.7  | 943.483536 | -0.007028 | <a href="#">RSGPSPTAR</a> |
| 11.6  | 943.483521 | -0.007013 | <a href="#">ALGDRDAAR</a> |
| 11.0  | 943.483521 | -0.007013 | <a href="#">REVADAQR</a>  |
| 11.0  | 943.483521 | -0.007013 | <a href="#">REVEQQR</a>   |
| 9.5   | 943.483505 | -0.006997 | <a href="#">RENGLEAR</a>  |
| 9.4   | 943.483536 | -0.007028 | <a href="#">AASPTGRPR</a> |
| 8.7   | 943.483536 | -0.007028 | <a href="#">RSGPSPTAR</a> |

Mascot: <http://www.matrixscience.com/>

# MASCOT Search Results

## Peptide View

MS/MS Fragmentation of **LAAVQLLQFLAPK**

Found in **TEX10\_HUMAN**, Testis-expressed sequence 10 protein OS=Homo sapiens GN=TEX10 PE=1 SV=2

Match to Query 43661: 1410.859828 from(706.437190,2+) rtinseconds(4394) index(64533)

Title: Locus:1.1.1.3081.13

Data file 2011-11-14 - TFD - EP 8-2.mgf

Click mouse within plot area to zoom in by factor of two about that point

Or, Plot from  to  Da

Label all possible matches  Label matches used for scoring

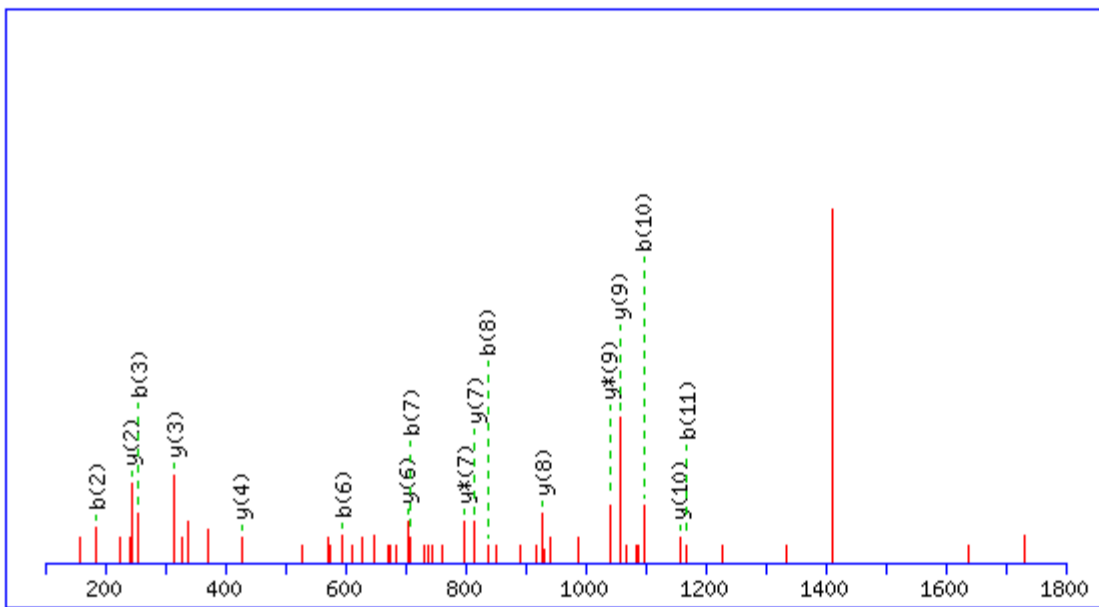

Monoisotopic mass of neutral peptide Mr(calc): 1410.859848

Fixed modifications: Propionamide (C) (apply to specified residues or termini only)

Ions Score: 59 Expect: 1.3e-006

Matches : 17/88 fragment ions using 29 most intense peaks [\(help\)](#)

| #  | b                  | b <sup>++</sup> | b <sup>*</sup> | b <sup>*++</sup> | Seq. | y                  | y <sup>++</sup> | y <sup>*</sup>     | y <sup>*++</sup> | #  |
|----|--------------------|-----------------|----------------|------------------|------|--------------------|-----------------|--------------------|------------------|----|
| 1  | 114.091340         | 57.549308       |                |                  | L    |                    |                 |                    |                  | 13 |
| 2  | <b>185.128454</b>  | 93.067865       |                |                  | A    | 1298.783086        | 649.895181      | 1281.756537        | 641.381907       | 12 |
| 3  | <b>256.165568</b>  | 128.586422      |                |                  | A    | 1227.745972        | 614.376624      | 1210.719423        | 605.863350       | 11 |
| 4  | 355.233982         | 178.120629      |                |                  | V    | <b>1156.708858</b> | 578.858067      | 1139.682309        | 570.344793       | 10 |
| 5  | 483.292560         | 242.149918      | 466.266011     | 233.636643       | Q    | <b>1057.640444</b> | 529.323860      | <b>1040.613895</b> | 520.810586       | 9  |
| 6  | <b>596.376624</b>  | 298.691950      | 579.350075     | 290.178676       | L    | <b>929.581866</b>  | 465.294571      | 912.555317         | 456.781297       | 8  |
| 7  | <b>709.460688</b>  | 355.233982      | 692.434139     | 346.720708       | L    | <b>816.497802</b>  | 408.752539      | <b>799.471253</b>  | 400.239265       | 7  |
| 8  | <b>837.519266</b>  | 419.263271      | 820.492717     | 410.749997       | Q    | <b>703.413738</b>  | 352.210507      | 686.387189         | 343.697233       | 6  |
| 9  | 984.587680         | 492.797478      | 967.561131     | 484.284203       | F    | 575.355160         | 288.181218      | 558.328611         | 279.667944       | 5  |
| 10 | <b>1097.671744</b> | 549.339510      | 1080.645195    | 540.826236       | L    | <b>428.286746</b>  | 214.647011      | 411.260197         | 206.133737       | 4  |
| 11 | <b>1168.708858</b> | 584.858067      | 1151.682309    | 576.344793       | A    | <b>315.202682</b>  | 158.104979      | 298.176133         | 149.591704       | 3  |
| 12 | 1265.761622        | 633.384449      | 1248.735073    | 624.871175       | P    | <b>244.165568</b>  | 122.586422      | 227.139019         | 114.073148       | 2  |
| 13 |                    |                 |                |                  | K    | 147.112804         | 74.060040       | 130.086255         | 65.546765        | 1  |

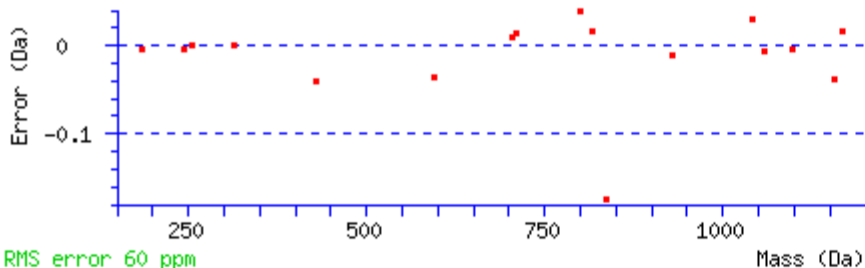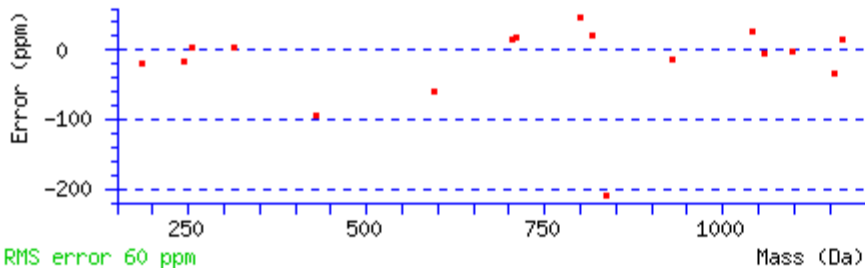

NCBI BLAST search of [LAAVQLLQFLAPK](#)

(Parameters: blastp, nr protein database, expect=20000, no filter, PAM30)

Other BLAST [web gateways](#)

## All matches to this query

| Score | Mr(calc):   | Delta     | Sequence                      |
|-------|-------------|-----------|-------------------------------|
| 58.7  | 1410.859848 | -0.000020 | <a href="#">LAAVQLLQFLAPK</a> |

**Peptide View**

MS/MS Fragmentation of **ILQEDPTNTAAR**

Found in **TTC35\_HUMAN**, Tetratricopeptide repeat protein 35 OS=Homo sapiens GN=TTC35 PE=1 SV=1

Match to Query 37731: 1327.674828 from(664.844690,2+) rtinseconds(1372) index(10609)

Title: Locus:1.1.1.1865.40

Data file 2011-11-10 - TFD - EP 3-4.mgf

Click mouse within plot area to zoom in by factor of two about that point

Or, Plot from  to  Da

Label all possible matches  Label matches used for scoring

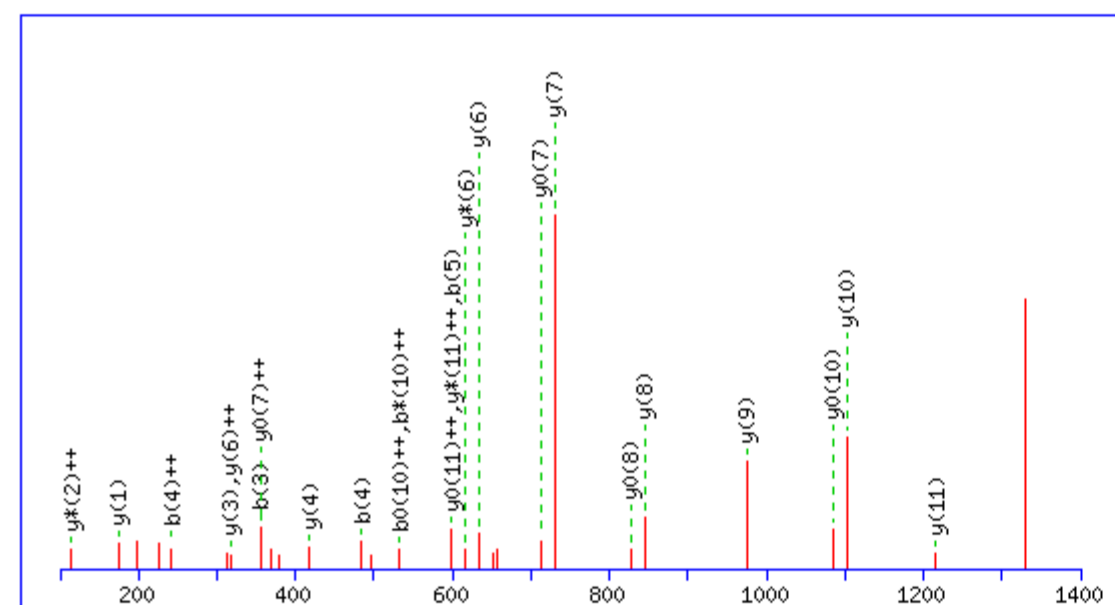

Monoisotopic mass of neutral peptide Mr(calc): 1327.673172

Fixed modifications: Propionamide (C) (apply to specified residues or termini only)

Ions Score: 77 Expect: 2.8e-007

Matches : 24/116 fragment ions using 28 most intense peaks [\(help\)](#)

| #  | b                 | b <sup>++</sup>   | b <sup>*</sup> | b <sup>*++</sup>  | b <sup>0</sup> | b <sup>0++</sup>  | Seq. | y                  | y <sup>++</sup>   | y <sup>*</sup>    | y <sup>*++</sup>  | y <sup>0</sup>     | y <sup>0++</sup>  | #  |
|----|-------------------|-------------------|----------------|-------------------|----------------|-------------------|------|--------------------|-------------------|-------------------|-------------------|--------------------|-------------------|----|
| 1  | 114.091340        | 57.549308         |                |                   |                |                   | I    |                    |                   |                   |                   |                    |                   | 12 |
| 2  | 227.175404        | 114.091340        |                |                   |                |                   | L    | <b>1215.596407</b> | 608.301842        | 1198.569858       | <b>599.788567</b> | 1197.585842        | <b>599.296559</b> | 11 |
| 3  | <b>355.233982</b> | 178.120629        | 338.207433     | 169.607355        |                |                   | Q    | <b>1102.512343</b> | 551.759810        | 1085.485794       | 543.246535        | <b>1084.501778</b> | 542.754527        | 10 |
| 4  | <b>484.276575</b> | <b>242.641926</b> | 467.250026     | 234.128651        | 466.266010     | 233.636643        | E    | <b>974.453765</b>  | 487.730521        | 957.427216        | 479.217246        | 956.443200         | 478.725238        | 9  |
| 5  | <b>599.303518</b> | 300.155397        | 582.276969     | 291.642123        | 581.292953     | 291.150115        | D    | <b>845.411172</b>  | 423.209224        | 828.384623        | 414.695950        | <b>827.400607</b>  | 414.203942        | 8  |
| 6  | 696.356282        | 348.681779        | 679.329733     | 340.168505        | 678.345717     | 339.676497        | P    | <b>730.384229</b>  | 365.695753        | 713.357680        | 357.182478        | <b>712.373664</b>  | <b>356.690470</b> | 7  |
| 7  | 797.403961        | 399.205619        | 780.377412     | 390.692344        | 779.393396     | 390.200336        | T    | <b>633.331465</b>  | <b>317.169371</b> | <b>616.304916</b> | 308.656096        | 615.320900         | 308.164088        | 6  |
| 8  | 911.446888        | 456.227082        | 894.420339     | 447.713808        | 893.436323     | 447.221800        | N    | 532.283786         | 266.645531        | 515.257237        | 258.132257        | 514.273221         | 257.640249        | 5  |
| 9  | 1012.494567       | 506.750922        | 995.468018     | 498.237647        | 994.484002     | 497.745639        | T    | <b>418.240859</b>  | 209.624068        | 401.214310        | 201.110793        | 400.230294         | 200.618785        | 4  |
| 10 | 1083.531681       | 542.269479        | 1066.505132    | <b>533.756204</b> | 1065.521116    | <b>533.264196</b> | A    | <b>317.193180</b>  | 159.100228        | 300.166631        | 150.586953        |                    |                   | 3  |
| 11 | 1154.568795       | 577.788036        | 1137.542246    | 569.274761        | 1136.558230    | 568.782753        | A    | 246.156066         | 123.581671        | 229.129517        | <b>115.068396</b> |                    |                   | 2  |
| 12 |                   |                   |                |                   |                |                   | R    | <b>175.118952</b>  | 88.063114         | 158.092403        | 79.549839         |                    |                   | 1  |

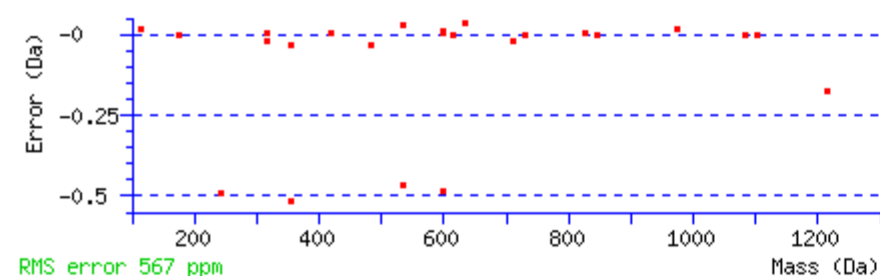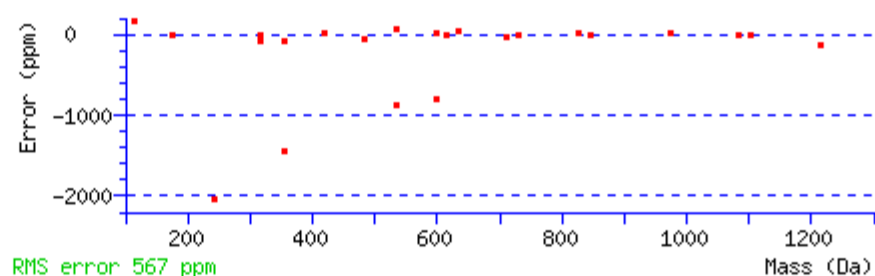

NCBI BLAST search of [ILQEDPTNTAAR](#)

(Parameters: blastp, nr protein database, expect=20000, no filter, PAM30)

Other BLAST [web gateways](#)

**All matches to this query**

| Score | Mr(calc):   | Delta     | Sequence                     |
|-------|-------------|-----------|------------------------------|
| 76.7  | 1327.673172 | 0.001656  | <a href="#">ILQEDPTNTAAR</a> |
| 8.4   | 1327.684418 | -0.009590 | <a href="#">QLNSTVSSLHSR</a> |
| 7.3   | 1327.674698 | 0.000130  | <a href="#">LQNPMYFFLR</a>   |
| 5.4   | 1327.674713 | 0.000115  | <a href="#">LLSYMFFHVR</a>   |
| 4.4   | 1327.677185 | -0.002357 | <a href="#">QPPEALPFLER</a>  |
| 4.3   | 1327.670654 | 0.004174  | <a href="#">LIREMFNYAR</a>   |
| 4.3   | 1327.661957 | 0.012871  | <a href="#">QLLIDPEDDVR</a>  |
| 2.8   | 1327.670654 | 0.004174  | <a href="#">YIIYNSRPMR</a>   |
| 2.5   | 1327.687088 | -0.012260 | <a href="#">KLDPEIVPEEK</a>  |
| 2.3   | 1327.677872 | -0.003044 | <a href="#">SSARSLQHLCR</a>  |



**Peptide View**

MS/MS Fragmentation of **LYDITEGER**

Found in **TPK1\_HUMAN**, Thiamin pyrophosphokinase 1 OS=Homo sapiens GN=TPK1 PE=1 SV=1

Match to Query 23059: 1094.528908 from(548.271730,2+) rtinseconds(1928) index(19676)

Title: Locus:1.1.1.2050.32

Data file 2011-11-10 - TFD - EP 4-5.mgf

Click mouse within plot area to zoom in by factor of two about that point

Or, Plot from  to  Da

Label all possible matches  Label matches used for scoring

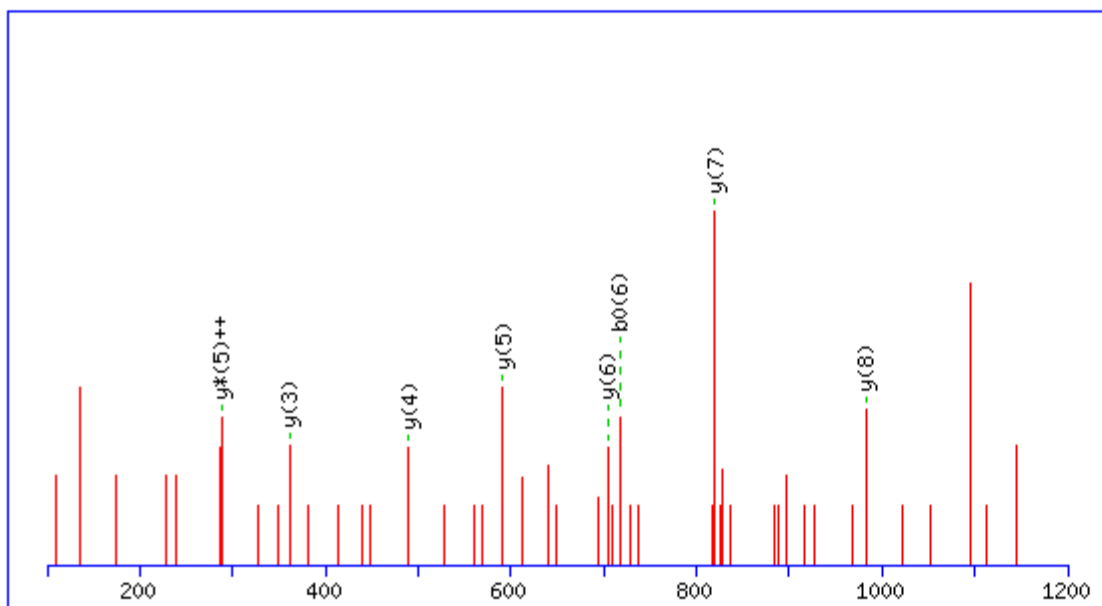

Monoisotopic mass of neutral peptide Mr(calc): 1094.524384

Fixed modifications: Propionamide (C) (apply to specified residues or termini only)

Ions Score: 48 Expect: 0.00015

Matches : 8/74 fragment ions using 10 most intense peaks [\(help\)](#)

| # | b          | b <sup>++</sup> | b <sup>0</sup> | b <sup>0++</sup> | Seq. | y          | y <sup>++</sup> | y <sup>*</sup> | y <sup>*++</sup> | y <sup>0</sup> | y <sup>0++</sup> | # |
|---|------------|-----------------|----------------|------------------|------|------------|-----------------|----------------|------------------|----------------|------------------|---|
| 1 | 114.091340 | 57.549308       |                |                  | L    |            |                 |                |                  |                |                  | 9 |
| 2 | 277.154669 | 139.080973      |                |                  | Y    | 982.447617 | 491.727447      | 965.421068     | 483.214172       | 964.437052     | 482.722164       | 8 |
| 3 | 392.181612 | 196.594444      | 374.171047     | 187.589162       | D    | 819.384288 | 410.195782      | 802.357739     | 401.682508       | 801.373723     | 401.190500       | 7 |
| 4 | 505.265676 | 253.136476      | 487.255111     | 244.131194       | I    | 704.357345 | 352.682311      | 687.330796     | 344.169036       | 686.346780     | 343.677028       | 6 |
| 5 | 606.313355 | 303.660316      | 588.302790     | 294.655033       | T    | 591.273281 | 296.140279      | 574.246732     | 287.627004       | 573.262716     | 287.134996       | 5 |
| 6 | 735.355948 | 368.181612      | 717.345383     | 359.176330       | E    | 490.225602 | 245.616439      | 473.199053     | 237.103164       | 472.215037     | 236.611156       | 4 |
| 7 | 792.377412 | 396.692344      | 774.366847     | 387.687062       | G    | 361.183009 | 181.095142      | 344.156460     | 172.581868       | 343.172444     | 172.089860       | 3 |
| 8 | 921.420005 | 461.213641      | 903.409440     | 452.208358       | E    | 304.161545 | 152.584410      | 287.134996     | 144.071136       | 286.150980     | 143.579128       | 2 |
| 9 |            |                 |                |                  | R    | 175.118952 | 88.063114       | 158.092403     | 79.549839        |                |                  | 1 |

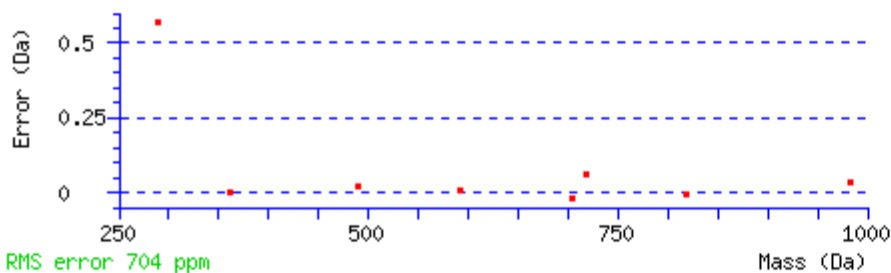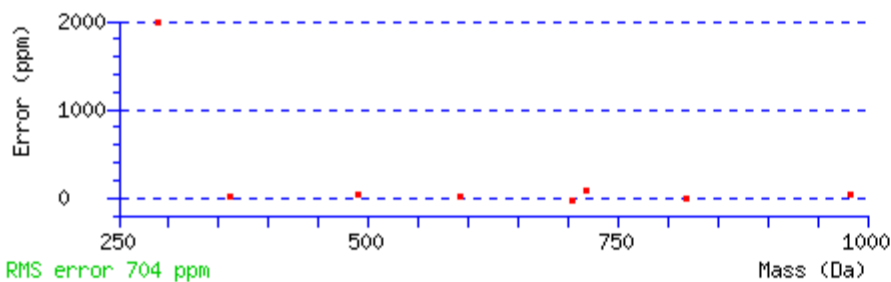

NCBI BLAST search of **LYDITEGER**

(Parameters: blastp, nr protein database, expect=20000, no filter, PAM30)

Other BLAST [web gateways](#)

All matches to this query

| Score | Mr(calc):   | Delta    | Sequence                  |
|-------|-------------|----------|---------------------------|
| 47.5  | 1094.524384 | 0.004524 | <a href="#">LYDITEGER</a> |

**Peptide View**

MS/MS Fragmentation of **TSQTVATFLDELAQK**  
 Found in **THOP1\_HUMAN**, Thimet oligopeptidase OS=Homo sapiens GN=THOP1 PE=1 SV=2

Match to Query 54295: 1650.838808 from(826.426680,2+) rtinseconds(3878) index(57135)  
 Title: Locus:1.1.1.2890.41  
 Data file 2011-11-14 - TFD - EP 8-2.mgf

Click mouse within plot area to zoom in by factor of two about that point  
 Or, Plot from  to  Da   
 Label all possible matches  Label matches used for scoring

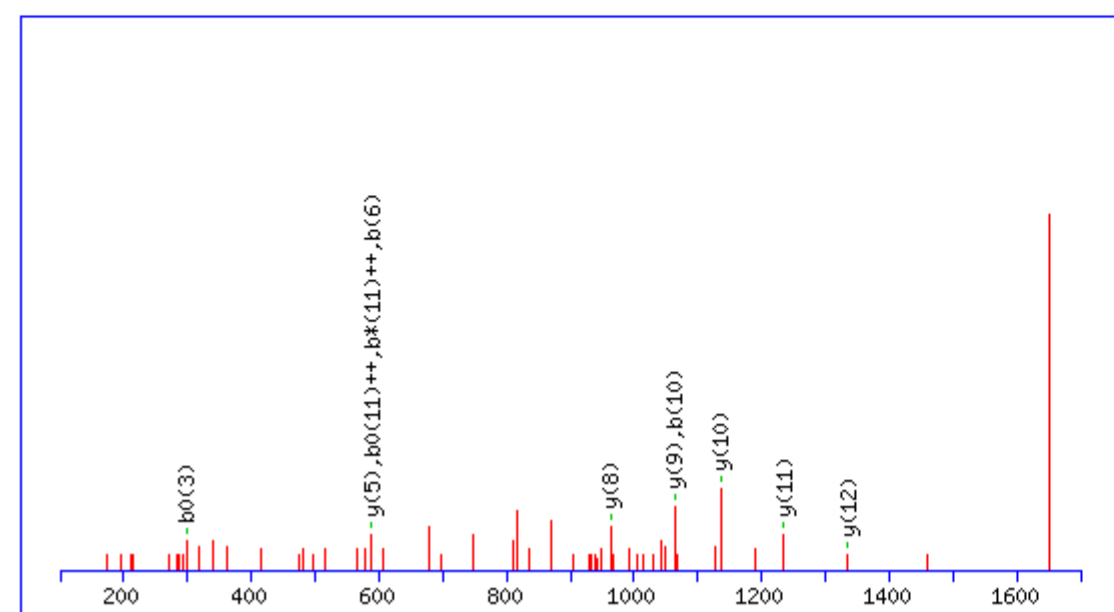

Monoisotopic mass of neutral peptide Mr(calcd): 1650.846466  
 Fixed modifications: Propionamide (C) (apply to specified residues or termini only)  
 Ions Score: 36 Expect: 0.0018  
 Matches : 11/156 fragment ions using 13 most intense peaks ([help](#))

| #  | b           | b <sup>++</sup> | b <sup>*</sup> | b <sup>*++</sup> | b <sup>0</sup> | b <sup>0++</sup> | Seq. | y           | y <sup>++</sup> | y <sup>*</sup> | y <sup>*++</sup> | y <sup>0</sup> | y <sup>0++</sup> | #  |
|----|-------------|-----------------|----------------|------------------|----------------|------------------|------|-------------|-----------------|----------------|------------------|----------------|------------------|----|
| 1  | 102.054955  | 51.531116       |                |                  | 84.044390      | 42.525833        | T    |             |                 |                |                  |                |                  | 15 |
| 2  | 189.086983  | 95.047129       |                |                  | 171.076418     | 86.041847        | S    | 1550.806066 | 775.906671      | 1533.779517    | 767.393397       | 1532.795501    | 766.901389       | 14 |
| 3  | 317.145561  | 159.076418      | 300.119012     | 150.563144       | 299.134996     | 150.071136       | Q    | 1463.774038 | 732.390657      | 1446.747489    | 723.877383       | 1445.763473    | 723.385375       | 13 |
| 4  | 418.193240  | 209.600258      | 401.166691     | 201.086984       | 400.182675     | 200.594976       | T    | 1335.715460 | 668.361368      | 1318.688911    | 659.848094       | 1317.704895    | 659.356086       | 12 |
| 5  | 517.261654  | 259.134465      | 500.235105     | 250.621191       | 499.251089     | 250.129183       | V    | 1234.667781 | 617.837529      | 1217.641232    | 609.324254       | 1216.657216    | 608.832246       | 11 |
| 6  | 588.298768  | 294.653022      | 571.272219     | 286.139748       | 570.288203     | 285.647740       | A    | 1135.599367 | 568.303322      | 1118.572818    | 559.790047       | 1117.588802    | 559.298039       | 10 |
| 7  | 689.346447  | 345.176862      | 672.319898     | 336.663587       | 671.335882     | 336.171579       | T    | 1064.562253 | 532.784765      | 1047.535704    | 524.271490       | 1046.551688    | 523.779482       | 9  |
| 8  | 836.414861  | 418.711069      | 819.388312     | 410.197794       | 818.404296     | 409.705786       | F    | 963.514574  | 482.260925      | 946.488025     | 473.747651       | 945.504009     | 473.255643       | 8  |
| 9  | 949.498925  | 475.253101      | 932.472376     | 466.739826       | 931.488360     | 466.247818       | L    | 816.446160  | 408.726718      | 799.419611     | 400.213444       | 798.435595     | 399.721436       | 7  |
| 10 | 1064.525868 | 532.766572      | 1047.499319    | 524.253298       | 1046.515303    | 523.761289       | D    | 703.362096  | 352.184686      | 686.335547     | 343.671412       | 685.351531     | 343.179404       | 6  |
| 11 | 1193.568461 | 597.287869      | 1176.541912    | 588.774594       | 1175.557896    | 588.282586       | E    | 588.335153  | 294.671215      | 571.308604     | 286.157940       | 570.324588     | 285.665932       | 5  |
| 12 | 1306.652525 | 653.829901      | 1289.625976    | 645.316626       | 1288.641960    | 644.824618       | L    | 459.292560  | 230.149918      | 442.266011     | 221.636643       |                |                  | 4  |
| 13 | 1377.689639 | 689.348457      | 1360.663090    | 680.835183       | 1359.679074    | 680.343175       | A    | 346.208496  | 173.607886      | 329.181947     | 165.094612       |                |                  | 3  |
| 14 | 1505.748217 | 753.377747      | 1488.721668    | 744.864472       | 1487.737652    | 744.372464       | Q    | 275.171382  | 138.089329      | 258.144833     | 129.576055       |                |                  | 2  |
| 15 |             |                 |                |                  |                |                  | K    | 147.112804  | 74.060040       | 130.086255     | 65.546765        |                |                  | 1  |

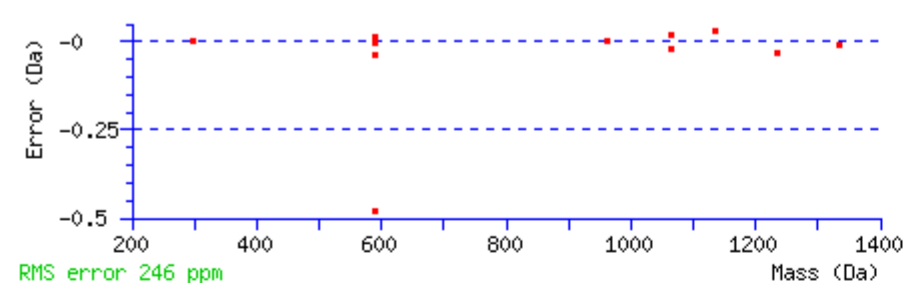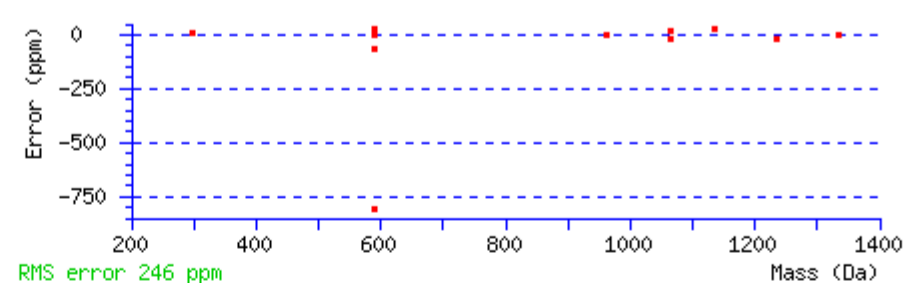

NCBI BLAST search of [TSQTVATFLDELAQK](#)  
 (Parameters: blastp, nr protein database, expect=20000, no filter, PAM30)  
 Other BLAST [web gateways](#)

**All matches to this query**

| Score | Mr(calcd):  | Delta     | Sequence                           |
|-------|-------------|-----------|------------------------------------|
| 36.2  | 1650.846466 | -0.007658 | <a href="#">TSQTVATFLDELAQK</a>    |
| 0.8   | 1650.836609 | 0.002199  | <a href="#">GFPGPKGGPGDPGPTGLK</a> |
| 0.1   | 1650.836594 | 0.002214  | <a href="#">FFQTSAVPPGTSLSGR</a>   |

**Peptide View**

MS/MS Fragmentation of **VTAVPTLLK**

Found in **TXD17\_HUMAN**, Thioredoxin domain-containing protein 17 OS=Homo sapiens GN=TXNDC17 PE=1 SV=1

Match to Query 9328: 940.594028 from(471.304290,2+) rtinseconds(2255) index(28047)

Title: Locus:1.1.1.1248.10

Data file 2012-01-27 - TFD - Epitel - IEC - 10ul - 1.mgf

Click mouse within plot area to zoom in by factor of two about that point

Or, Plot from  to  Da

Label all possible matches  Label matches used for scoring

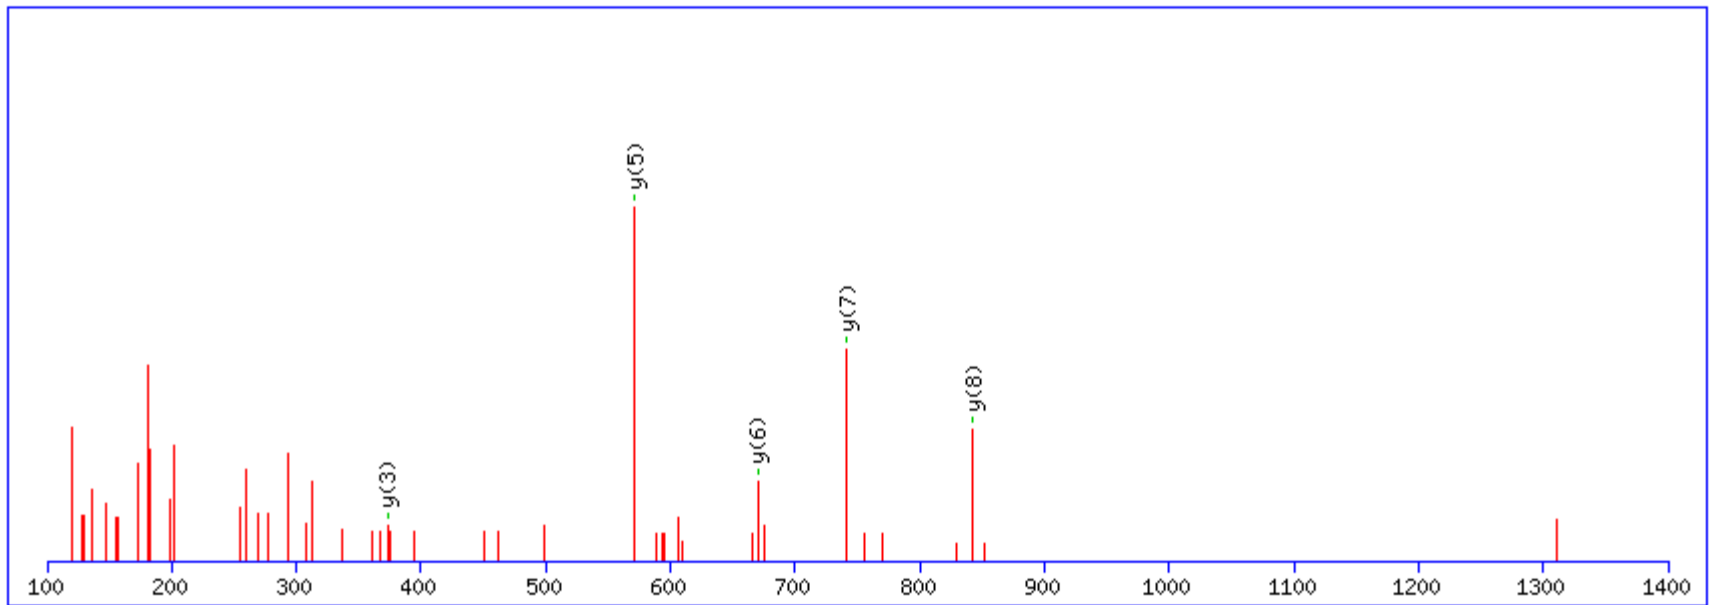

Monoisotopic mass of neutral peptide Mr(calc): 940.595718

Fixed modifications: Carbamidomethyl (C) (apply to specified residues or termini only)

Ions Score: 36 Expect: 0.00034

Matches : 5/72 fragment ions using 8 most intense peaks ([help](#))

| # | b          | b <sup>++</sup> | b <sup>0</sup> | b <sup>0++</sup> | Seq. | y          | y <sup>++</sup> | y <sup>*</sup> | y <sup>*++</sup> | y <sup>0</sup> | y <sup>0++</sup> | # |
|---|------------|-----------------|----------------|------------------|------|------------|-----------------|----------------|------------------|----------------|------------------|---|
| 1 | 100.075690 | 50.541483       |                |                  | V    |            |                 |                |                  |                |                  | 9 |
| 2 | 201.123369 | 101.065322      | 183.112804     | 92.060040        | T    | 842.534582 | 421.770929      | 825.508033     | 413.257655       | 824.524017     | 412.765647       | 8 |
| 3 | 272.160483 | 136.583879      | 254.149918     | 127.578597       | A    | 741.486903 | 371.247090      | 724.460354     | 362.733815       | 723.476338     | 362.241807       | 7 |
| 4 | 371.228897 | 186.118087      | 353.218332     | 177.112804       | V    | 670.449789 | 335.728533      | 653.423240     | 327.215258       | 652.439224     | 326.723250       | 6 |
| 5 | 468.281661 | 234.644469      | 450.271096     | 225.639186       | P    | 571.381375 | 286.194326      | 554.354826     | 277.681051       | 553.370810     | 277.189043       | 5 |
| 6 | 569.329340 | 285.168308      | 551.318775     | 276.163026       | T    | 474.328611 | 237.667944      | 457.302062     | 229.154669       | 456.318046     | 228.662661       | 4 |
| 7 | 682.413404 | 341.710340      | 664.402839     | 332.705058       | L    | 373.280932 | 187.144104      | 356.254383     | 178.630830       |                |                  | 3 |
| 8 | 795.497468 | 398.252372      | 777.486903     | 389.247090       | L    | 260.196868 | 130.602072      | 243.170319     | 122.088798       |                |                  | 2 |
| 9 |            |                 |                |                  | K    | 147.112804 | 74.060040       | 130.086255     | 65.546765        |                |                  | 1 |

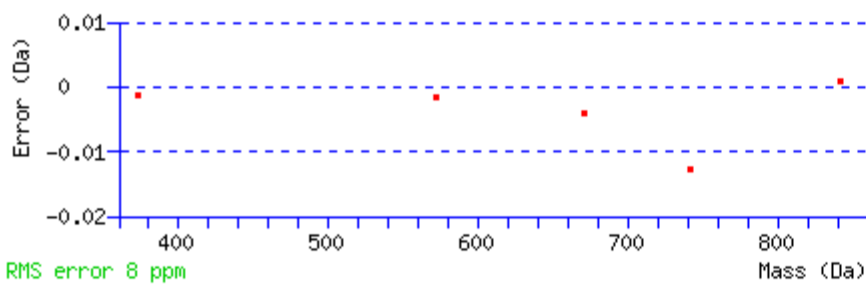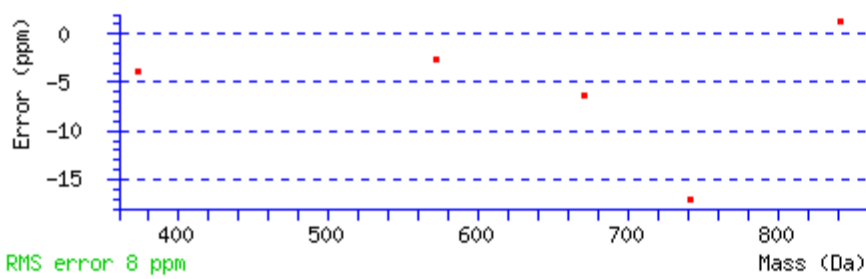

NCBI BLAST search of **VTAVPTLLK**

(Parameters: blastp, nr protein database, expect=20000, no filter, PAM30)

Other BLAST [web gateways](#)

All matches to this query

| Score | Mr(calc):  | Delta     | Sequence                  |
|-------|------------|-----------|---------------------------|
| 36.0  | 940.595718 | -0.001690 | <a href="#">VTAVPTLLK</a> |

# MASCOT Search Results

## Peptide View

MS/MS Fragmentation of **IFINLPR**

Found in **TXNL1\_HUMAN**, Thioredoxin-like protein 1 OS=Homo sapiens GN=TXNL1 PE=1 SV=3

Match to Query 4530: 871.525568 from(436.770060,2+) rtinseconds(2746) index(37394)

Title: Locus:1.1.1.1435.7

Data file 2012-01-27 - TFD - Epitel - IEC - 10ul - 1.mgf

Click mouse within plot area to zoom in by factor of two about that point

Or, Plot from  to  Da

Label all possible matches  Label matches used for scoring

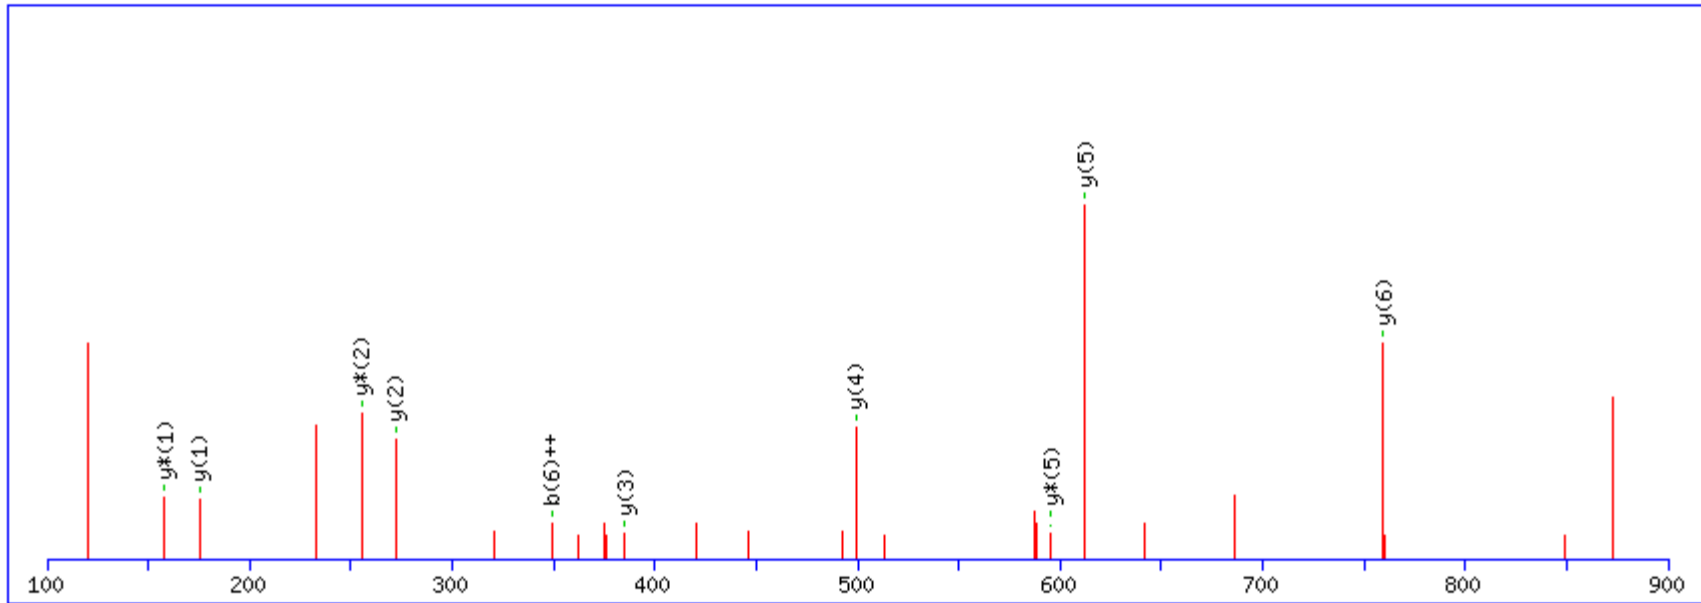

Monoisotopic mass of neutral peptide Mr(calc): 871.527954

Fixed modifications: Carbamidomethyl (C) (apply to specified residues or termini only)

Ions Score: 35 Expect: 0.0022

Matches : 10/42 fragment ions using 23 most intense peaks [\(help\)](#)

| # | b          | b <sup>++</sup>   | b <sup>*</sup> | b <sup>*++</sup> | Seq. | y                 | y <sup>++</sup> | y <sup>*</sup>    | y <sup>*++</sup> | # |
|---|------------|-------------------|----------------|------------------|------|-------------------|-----------------|-------------------|------------------|---|
| 1 | 114.091340 | 57.549308         |                |                  | I    |                   |                 |                   |                  | 7 |
| 2 | 261.159754 | 131.083515        |                |                  | F    | <b>759.451185</b> | 380.229231      | 742.424636        | 371.715956       | 6 |
| 3 | 374.243818 | 187.625547        |                |                  | I    | <b>612.382771</b> | 306.695024      | <b>595.356222</b> | 298.181749       | 5 |
| 4 | 488.286745 | 244.647010        | 471.260196     | 236.133736       | N    | <b>499.298707</b> | 250.152991      | 482.272158        | 241.639717       | 4 |
| 5 | 601.370809 | 301.189043        | 584.344260     | 292.675768       | L    | <b>385.255780</b> | 193.131528      | 368.229231        | 184.618253       | 3 |
| 6 | 698.423573 | <b>349.715425</b> | 681.397024     | 341.202150       | P    | <b>272.171716</b> | 136.589496      | <b>255.145167</b> | 128.076221       | 2 |
| 7 |            |                   |                |                  | R    | <b>175.118952</b> | 88.063114       | <b>158.092403</b> | 79.549839        | 1 |

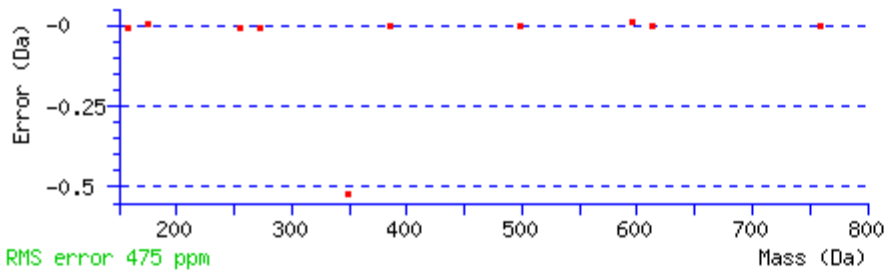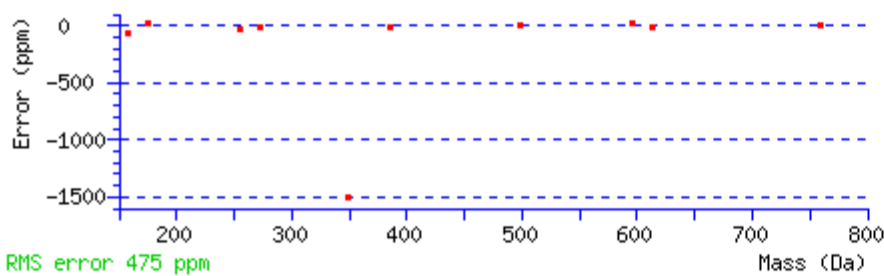

NCBI BLAST search of [IFINLPR](#)

(Parameters: blastp, nr protein database, expect=20000, no filter, PAM30)

Other BLAST [web gateways](#)

## All matches to this query

| Score | Mr(calc):  | Delta     | Sequence                 |
|-------|------------|-----------|--------------------------|
| 35.0  | 871.527954 | -0.002386 | <a href="#">IFINLPR</a>  |
| 8.0   | 871.523926 | 0.001642  | <a href="#">ISAKKPGR</a> |
| 6.9   | 871.527969 | -0.002401 | <a href="#">LLVFAPGR</a> |
| 5.4   | 871.527954 | -0.002386 | <a href="#">LFNPLIR</a>  |
| 5.3   | 871.523926 | 0.001642  | <a href="#">LSDILRR</a>  |
| 4.0   | 871.523926 | 0.001642  | <a href="#">KNAALVTR</a> |
| 3.2   | 871.523926 | 0.001642  | <a href="#">IAQLKSGR</a> |
| 2.1   | 871.523941 | 0.001627  | <a href="#">TLVLRDR</a>  |
| 2.0   | 871.523941 | 0.001627  | <a href="#">LLVDTRR</a>  |
| 1.4   | 871.523926 | 0.001642  | <a href="#">IAIQSKGR</a> |

**MATRIX SCIENCE Mascot Search Results**

**Peptide View**

MS/MS Fragmentation of **MDEVLYSIAEK**

Found in **TXN4A\_HUMAN**, Thioredoxin-like protein 4A OS=Homo sapiens GN=TXNL4A PE=1 SV=1

Match to Query 33123: 1312.619628 from(657.317090,2+) rtinseconds(2478) index(23402)

Title: Locus:1.1.1.2401.39

Data file 2011-11-10 - TFD - EP 4-7.mgf

Click mouse within plot area to zoom in by factor of two about that point

Or, Plot from  to  Da

Label all possible matches  Label matches used for scoring

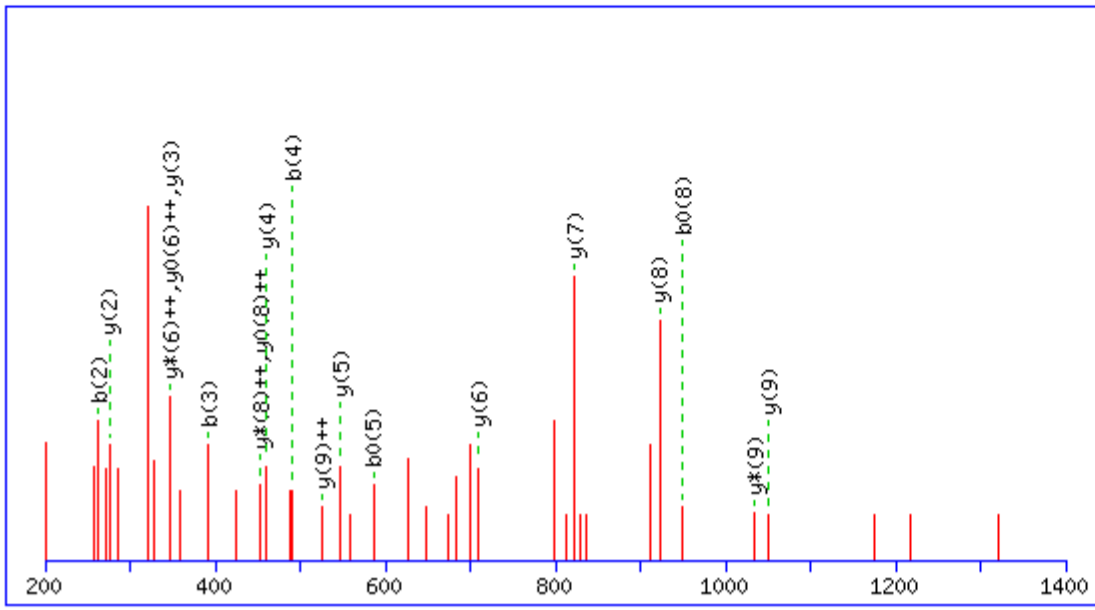

Monoisotopic mass of neutral peptide Mr(calc): 1312.622040

Fixed modifications: Propionamide (C) (apply to specified residues or termini only)

Variable modifications:

M1 : Oxidation (M), with neutral losses 0.000000 (shown in table), 63.998285

Ions Score: 53 Expect: 1.1e-005

Matches : 19/134 fragment ions using 27 most intense peaks [\(help\)](#)

| #  | b                 | b <sup>++</sup> | b <sup>0</sup>    | b <sup>0++</sup> | Seq.     | y                  | y <sup>++</sup>   | y <sup>*</sup>     | y <sup>*++</sup>  | y <sup>0</sup> | y <sup>0++</sup>  | #         |
|----|-------------------|-----------------|-------------------|------------------|----------|--------------------|-------------------|--------------------|-------------------|----------------|-------------------|-----------|
| 1  | 148.042676        | 74.524976       |                   |                  | <b>M</b> |                    |                   |                    |                   |                |                   | <b>11</b> |
| 2  | <b>263.069619</b> | 132.038447      | 245.059054        | 123.033165       | <b>D</b> | 1166.593946        | 583.800611        | 1149.567397        | 575.287337        | 1148.583381    | 574.795328        | <b>10</b> |
| 3  | <b>392.112212</b> | 196.559744      | 374.101647        | 187.554462       | <b>E</b> | <b>1051.567003</b> | <b>526.287139</b> | <b>1034.540454</b> | 517.773865        | 1033.556438    | 517.281857        | <b>9</b>  |
| 4  | <b>491.180626</b> | 246.093951      | 473.170061        | 237.088669       | <b>V</b> | <b>922.524410</b>  | 461.765843        | 905.497861         | <b>453.252569</b> | 904.513845     | <b>452.760561</b> | <b>8</b>  |
| 5  | 604.264690        | 302.635983      | <b>586.254125</b> | 293.630701       | <b>L</b> | <b>823.455996</b>  | 412.231636        | 806.429447         | 403.718361        | 805.445431     | 403.226353        | <b>7</b>  |
| 6  | 767.328019        | 384.167648      | 749.317454        | 375.162365       | <b>Y</b> | <b>710.371932</b>  | 355.689604        | 693.345383         | <b>347.176329</b> | 692.361367     | <b>346.684321</b> | <b>6</b>  |
| 7  | 854.360047        | 427.683662      | 836.349482        | 418.678379       | <b>S</b> | <b>547.308603</b>  | 274.157940        | 530.282054         | 265.644665        | 529.298038     | 265.152657        | <b>5</b>  |
| 8  | 967.444111        | 484.225694      | <b>949.433546</b> | 475.220411       | <b>I</b> | <b>460.276575</b>  | 230.641925        | 443.250026         | 222.128651        | 442.266010     | 221.636643        | <b>4</b>  |
| 9  | 1038.481225       | 519.744251      | 1020.470660       | 510.738968       | <b>A</b> | <b>347.192511</b>  | 174.099893        | 330.165962         | 165.586619        | 329.181946     | 165.094611        | <b>3</b>  |
| 10 | 1167.523818       | 584.265547      | 1149.513253       | 575.260264       | <b>E</b> | <b>276.155397</b>  | 138.581336        | 259.128848         | 130.068062        | 258.144832     | 129.576054        | <b>2</b>  |
| 11 |                   |                 |                   |                  | <b>K</b> | 147.112804         | 74.060040         | 130.086255         | 65.546765         |                |                   | <b>1</b>  |

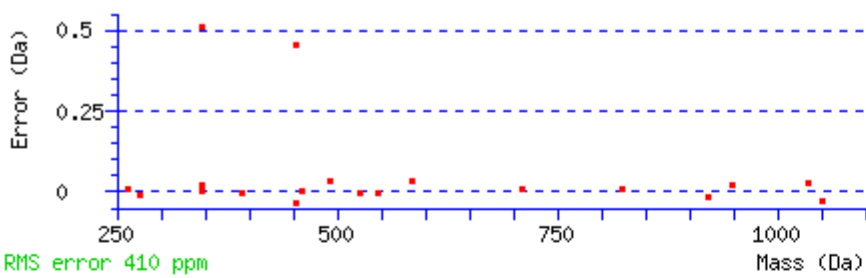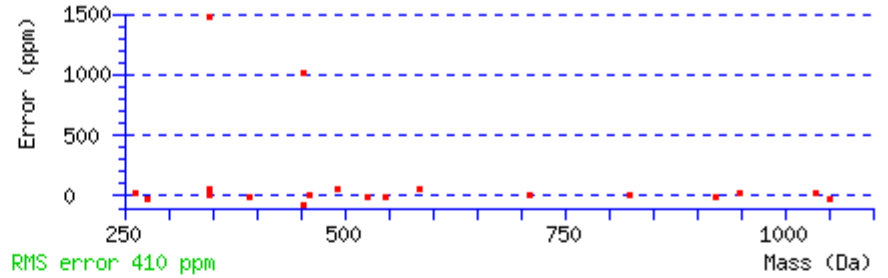

NCBI BLAST search of [MDEVLYSIAEK](#)

(Parameters: blastp, nr protein database, expect=20000, no filter, PAM30)

Other BLAST [web gateways](#)

**All matches to this query**

| Score | Mr(calc):   | Delta     | Sequence                      |
|-------|-------------|-----------|-------------------------------|
| 52.8  | 1312.622040 | -0.002412 | <a href="#">MDEVLYSIAEK</a>   |
| 0.1   | 1312.616013 | 0.003615  | <a href="#">FDKLSHASSGAGH</a> |

# **MASCOT** Mascot Search Results

## Peptide View

MS/MS Fragmentation of **YVLGMQELFR**

Found in **THOC3\_HUMAN**, THO complex subunit 3 OS=Homo sapiens GN=THOC3 PE=1 SV=1

Match to Query 34651: 1254.633848 from(628.324200,2+) rtinseconds(3508) index(51145)

Title: Locus:1.1.1.2717.22

Data file 2011-11-14 - TFD - EP 8-4.mgf

Click mouse within plot area to zoom in by factor of two about that point

Or, Plot from  to  Da

Label all possible matches  Label matches used for scoring

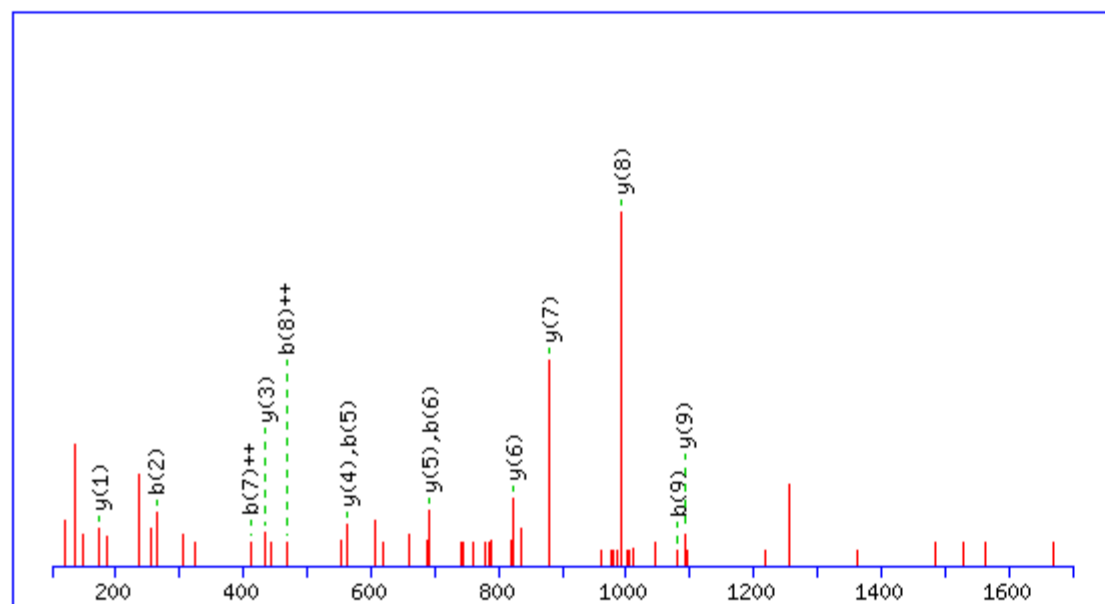

Monoisotopic mass of neutral peptide Mr(calc): 1254.643066

Fixed modifications: Propionamide (C) (apply to specified residues or termini only)

Ions Score: 43 Expect: 0.00033

Matches : 14/80 fragment ions using 30 most intense peaks [\(help\)](#)

| #  | b                  | b <sup>++</sup>   | b <sup>*</sup> | b <sup>+++</sup> | b <sup>0</sup> | b <sup>0++</sup> | Seq. | y                  | y <sup>++</sup> | y <sup>*</sup> | y <sup>+++</sup> | y <sup>0</sup> | y <sup>0++</sup> | #  |
|----|--------------------|-------------------|----------------|------------------|----------------|------------------|------|--------------------|-----------------|----------------|------------------|----------------|------------------|----|
| 1  | 164.070605         | 82.538940         |                |                  |                |                  | Y    |                    |                 |                |                  |                |                  | 10 |
| 2  | <b>263.139019</b>  | 132.073148        |                |                  |                |                  | V    | <b>1092.587028</b> | 546.797152      | 1075.560479    | 538.283878       | 1074.576463    | 537.791869       | 9  |
| 3  | 376.223083         | 188.615180        |                |                  |                |                  | L    | <b>993.518614</b>  | 497.262945      | 976.492065     | 488.749670       | 975.508049     | 488.257662       | 8  |
| 4  | 433.244547         | 217.125912        |                |                  |                |                  | G    | <b>880.434550</b>  | 440.720913      | 863.408001     | 432.207638       | 862.423985     | 431.715630       | 7  |
| 5  | <b>564.285032</b>  | 282.646154        |                |                  |                |                  | M    | <b>823.413086</b>  | 412.210181      | 806.386537     | 403.696907       | 805.402521     | 403.204899       | 6  |
| 6  | <b>692.343610</b>  | 346.675443        | 675.317061     | 338.162169       |                |                  | Q    | <b>692.372601</b>  | 346.689939      | 675.346052     | 338.176664       | 674.362036     | 337.684656       | 5  |
| 7  | 821.386203         | <b>411.196740</b> | 804.359654     | 402.683465       | 803.375638     | 402.191457       | E    | <b>564.314023</b>  | 282.660650      | 547.287474     | 274.147375       | 546.303458     | 273.655367       | 4  |
| 8  | 934.470267         | <b>467.738772</b> | 917.443718     | 459.225497       | 916.459702     | 458.733489       | L    | <b>435.271430</b>  | 218.139353      | 418.244881     | 209.626078       |                |                  | 3  |
| 9  | <b>1081.538681</b> | 541.272979        | 1064.512132    | 532.759704       | 1063.528116    | 532.267696       | F    | 322.187366         | 161.597321      | 305.160817     | 153.084046       |                |                  | 2  |
| 10 |                    |                   |                |                  |                |                  | R    | <b>175.118952</b>  | 88.063114       | 158.092403     | 79.549839        |                |                  | 1  |

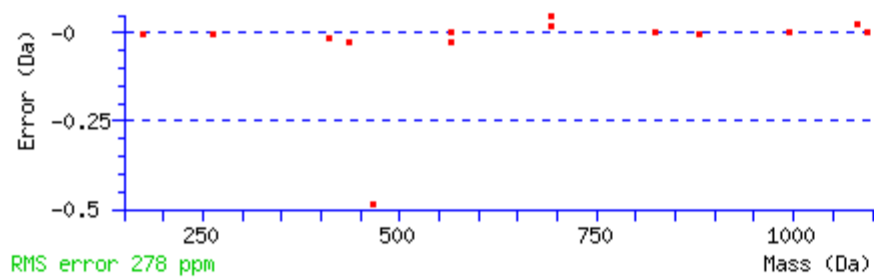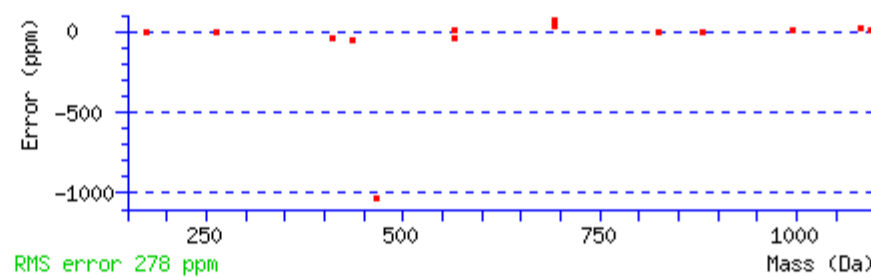

NCBI BLAST search of [YVLGMQELFR](#)

(Parameters: blastp, nr protein database, expect=20000, no filter, PAM30)

Other BLAST [web gateways](#)

All matches to this query

| Score | Mr(calc):   | Delta     | Sequence                      |
|-------|-------------|-----------|-------------------------------|
| 43.0  | 1254.643066 | -0.009218 | <a href="#">YVLGMQELFR</a>    |
| 3.7   | 1254.635681 | -0.001833 | <a href="#">HLTDPSTYGIPIR</a> |
| 2.6   | 1254.634323 | -0.000475 | <a href="#">YVSSLTEEISK</a>   |

# MASCOT SCIENCE Mascot Search Results

## Peptide View

MS/MS Fragmentation of **YAETFLEPWFK**

Found in **THUM1\_HUMAN**, THUMP domain-containing protein 1 OS=Homo sapiens GN=THUMPD1 PE=1 SV=2

Match to Query 36064: 1429.700328 from(715.857440,2+) rtinseconds(3753) index(55457)

Title: Locus:1.1.1.2942.20

Data file 2011-11-12 - TFD - EP 5-3.mgf

Click mouse within plot area to zoom in by factor of two about that point

Or, Plot from  to  Da

Label all possible matches  Label matches used for scoring

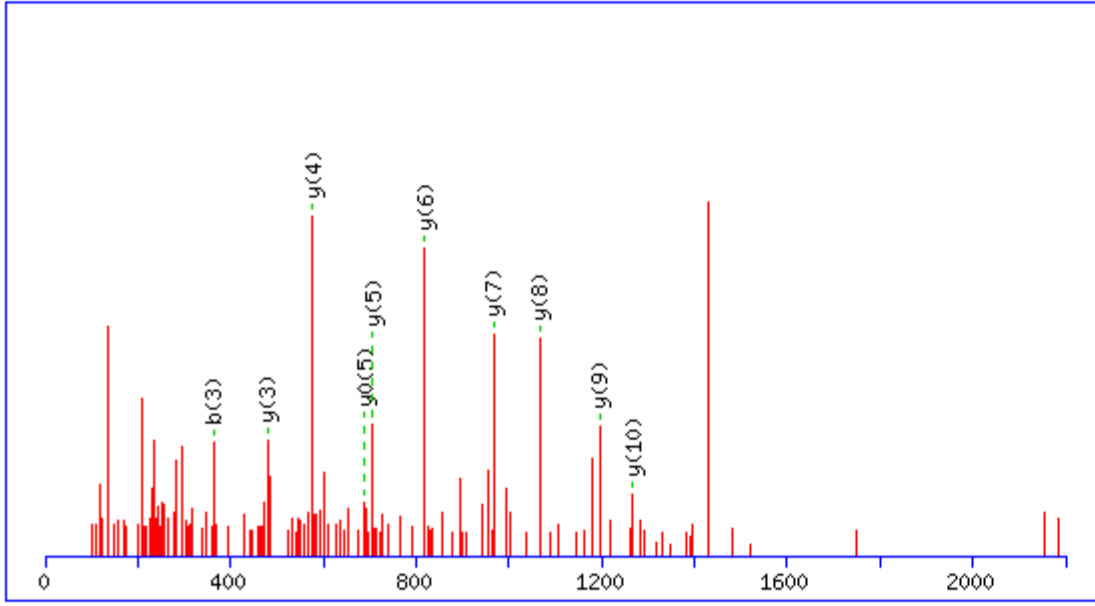

Monoisotopic mass of neutral peptide  $M_r(\text{calc})$ : 1429.691788

Fixed modifications: Propionamide (C) (apply to specified residues or termini only)

Ions Score: 64 Expect: 1.5e-006

Matches : 10/88 fragment ions using 13 most intense peaks [\(help\)](#)

| #  | b                 | b <sup>++</sup> | b <sup>0</sup> | b <sup>0++</sup> | Seq. | y                  | y <sup>++</sup> | y <sup>*</sup> | y <sup>*++</sup> | y <sup>0</sup>    | y <sup>0++</sup> | #  |
|----|-------------------|-----------------|----------------|------------------|------|--------------------|-----------------|----------------|------------------|-------------------|------------------|----|
| 1  | 164.070605        | 82.538940       |                |                  | Y    |                    |                 |                |                  |                   |                  | 11 |
| 2  | 235.107719        | 118.057498      |                |                  | A    | <b>1267.635752</b> | 634.321514      | 1250.609203    | 625.808240       | 1249.625187       | 625.316232       | 10 |
| 3  | <b>364.150312</b> | 182.578794      | 346.139747     | 173.573512       | E    | <b>1196.598638</b> | 598.802957      | 1179.572089    | 590.289683       | 1178.588073       | 589.797675       | 9  |
| 4  | 465.197991        | 233.102634      | 447.187426     | 224.097351       | T    | <b>1067.556045</b> | 534.281661      | 1050.529496    | 525.768386       | 1049.545480       | 525.276378       | 8  |
| 5  | 612.266405        | 306.636841      | 594.255840     | 297.631558       | F    | <b>966.508366</b>  | 483.757821      | 949.481817     | 475.244547       | 948.497801        | 474.752539       | 7  |
| 6  | 725.350469        | 363.178873      | 707.339904     | 354.173590       | L    | <b>819.439952</b>  | 410.223614      | 802.413403     | 401.710340       | 801.429387        | 401.218332       | 6  |
| 7  | 854.393062        | 427.700169      | 836.382497     | 418.694887       | E    | <b>706.355888</b>  | 353.681582      | 689.329339     | 345.168308       | <b>688.345323</b> | 344.676300       | 5  |
| 8  | 951.445826        | 476.226551      | 933.435261     | 467.221269       | P    | <b>577.313295</b>  | 289.160286      | 560.286746     | 280.647011       |                   |                  | 4  |
| 9  | 1137.525139       | 569.266208      | 1119.514574    | 560.260925       | W    | <b>480.260531</b>  | 240.633904      | 463.233982     | 232.120629       |                   |                  | 3  |
| 10 | 1284.593553       | 642.800415      | 1266.582988    | 633.795132       | F    | 294.181218         | 147.594247      | 277.154669     | 139.080973       |                   |                  | 2  |
| 11 |                   |                 |                |                  | K    | 147.112804         | 74.060040       | 130.086255     | 65.546765        |                   |                  | 1  |

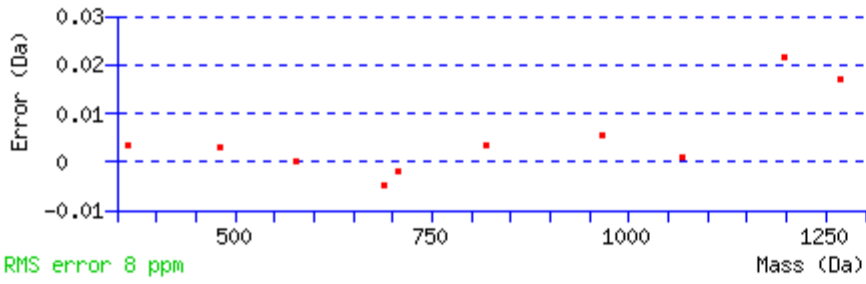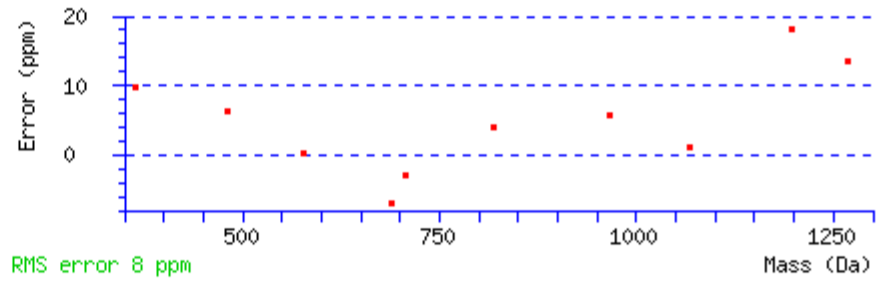

NCBI BLAST search of [YAETFLEPWFK](#)

(Parameters: blastp, nr protein database, expect=20000, no filter, PAM30)

Other BLAST [web gateways](#)

All matches to this query

| Score | $M_r(\text{calc})$ : | Delta    | Sequence                     |
|-------|----------------------|----------|------------------------------|
| 63.9  | 1429.691788          | 0.008540 | <a href="#">YAETFLEPWFK</a>  |
| 1.7   | 1429.688477          | 0.011851 | <a href="#">VLPCGPSPQHHR</a> |
| 1.7   | 1429.688477          | 0.011851 | <a href="#">VLPCGPSPQHHR</a> |

Mascot: <http://www.matrixscience.com/>

**Peptide View**

MS/MS Fragmentation of **FSIEDLK**

Found in **THYN1\_HUMAN**, Thymocyte nuclear protein 1 OS=Homo sapiens GN=THYN1 PE=1 SV=1

Match to Query 4017: 850.448068 from(426.231310,2+) rtinseconds(2669) index(33133)

Title: Locus:1.1.1.2434.4

Data file 2011-11-13 - TFD - EP 7-5.mgf

Click mouse within plot area to zoom in by factor of two about that point

Or, Plot from  to  Da

Label all possible matches  Label matches used for scoring

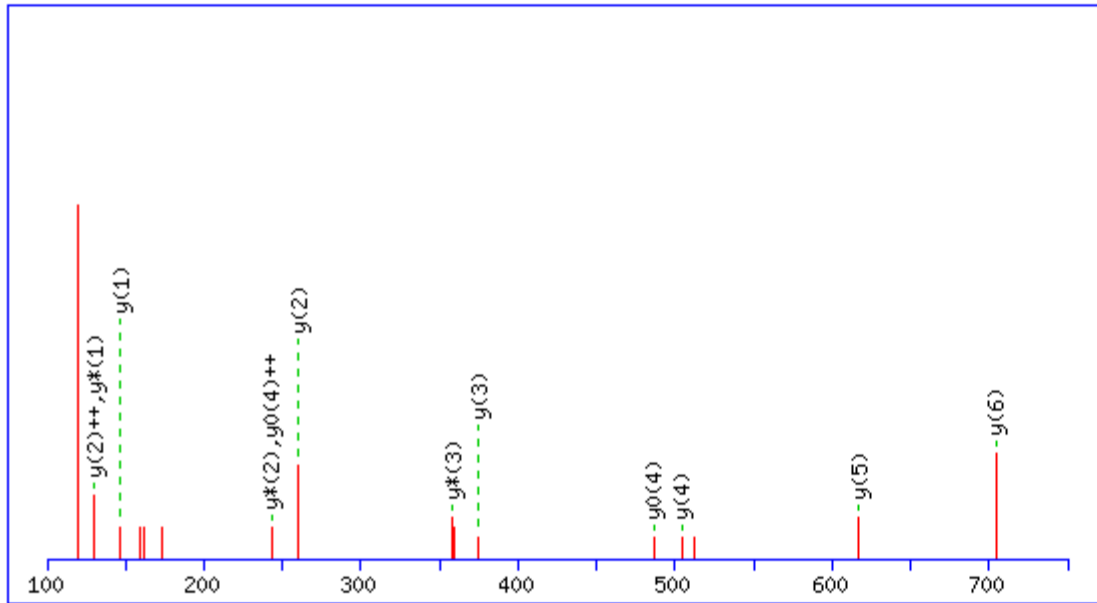

Monoisotopic mass of neutral peptide Mr(calc): 850.443619

Fixed modifications: Propionamide (C) (apply to specified residues or termini only)

Ions Score: 55 Expect: 3.5e-005

Matches : 12/54 fragment ions using 13 most intense peaks [\(help\)](#)

| # | b          | b <sup>++</sup> | b <sup>0</sup> | b <sup>0++</sup> | Seq. | y          | y <sup>++</sup> | y <sup>*</sup> | y <sup>*++</sup> | y <sup>0</sup> | y <sup>0++</sup> | # |
|---|------------|-----------------|----------------|------------------|------|------------|-----------------|----------------|------------------|----------------|------------------|---|
| 1 | 148.075690 | 74.541483       |                |                  | F    |            |                 |                |                  |                |                  | 7 |
| 2 | 235.107718 | 118.057497      | 217.097153     | 109.052214       | S    | 704.382496 | 352.694886      | 687.355947     | 344.181612       | 686.371931     | 343.689604       | 6 |
| 3 | 348.191782 | 174.599529      | 330.181217     | 165.594247       | I    | 617.350468 | 309.178872      | 600.323919     | 300.665598       | 599.339903     | 300.173590       | 5 |
| 4 | 477.234375 | 239.120826      | 459.223810     | 230.115543       | E    | 504.266404 | 252.636840      | 487.239855     | 244.123566       | 486.255839     | 243.631558       | 4 |
| 5 | 592.261318 | 296.634297      | 574.250753     | 287.629015       | D    | 375.223811 | 188.115544      | 358.197262     | 179.602269       | 357.213246     | 179.110261       | 3 |
| 6 | 705.345382 | 353.176329      | 687.334817     | 344.171047       | L    | 260.196868 | 130.602072      | 243.170319     | 122.088798       |                |                  | 2 |
| 7 |            |                 |                |                  | K    | 147.112804 | 74.060040       | 130.086255     | 65.546765        |                |                  | 1 |

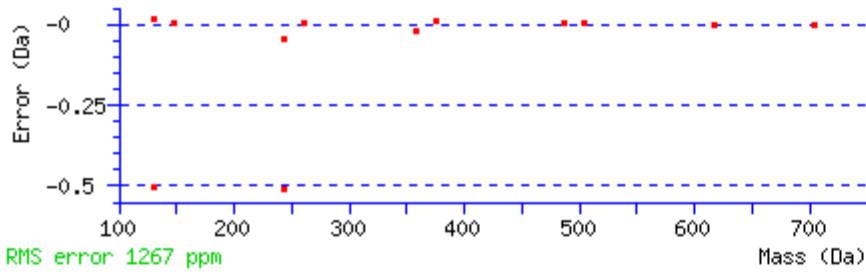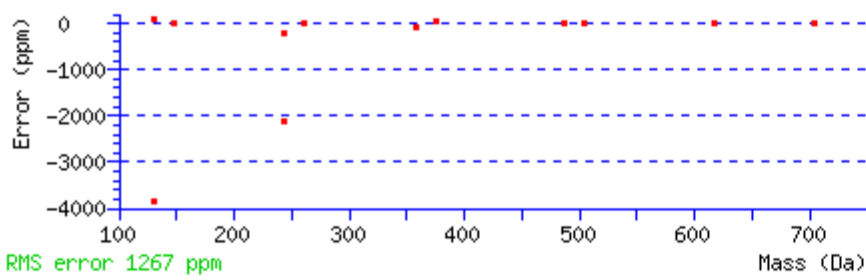

NCBI BLAST search of [FSIEDLK](#)

(Parameters: blastp, nr protein database, expect=20000, no filter, PAM30)

Other BLAST [web gateways](#)

**All matches to this query**

| Score | Mr(calc):  | Delta     | Sequence                 |
|-------|------------|-----------|--------------------------|
| 54.7  | 850.443619 | 0.004449  | <a href="#">FSIEDLK</a>  |
| 38.0  | 850.443604 | 0.004464  | <a href="#">AYIEDLK</a>  |
| 38.0  | 850.443604 | 0.004464  | <a href="#">YAIEDLK</a>  |
| 21.9  | 850.443619 | 0.004449  | <a href="#">SFLDELK</a>  |
| 11.1  | 850.443619 | 0.004449  | <a href="#">DYSPLK</a>   |
| 10.4  | 850.454849 | -0.006781 | <a href="#">FAANSTLK</a> |
| 9.4   | 850.443619 | 0.004449  | <a href="#">SFEVELK</a>  |
| 9.3   | 850.443634 | 0.004434  | <a href="#">YTDLVPK</a>  |
| 9.2   | 850.443619 | 0.004449  | <a href="#">ELVSYPK</a>  |
| 9.1   | 850.454865 | -0.006797 | <a href="#">DLHPLPK</a>  |



# MATRIX SCIENCE Mascot Search Results

## Peptide View

MS/MS Fragmentation of **GTPGPPPAHGAALQPHPR**

Found in **TRIP6\_HUMAN**, Thyroid receptor-interacting protein 6 OS=Homo sapiens GN=TRIP6 PE=1 SV=3

Match to Query 4048: 1756.905216 from(440.233580,4+) rtinseconds(1110) index(5053)

Title: Locus:1.1.1.1934.15

Data file 2011-11-12 - TFD - EP 5-3.mgf

Click mouse within plot area to zoom in by factor of two about that point

Or, Plot from  to  Da

Label all possible matches  Label matches used for scoring

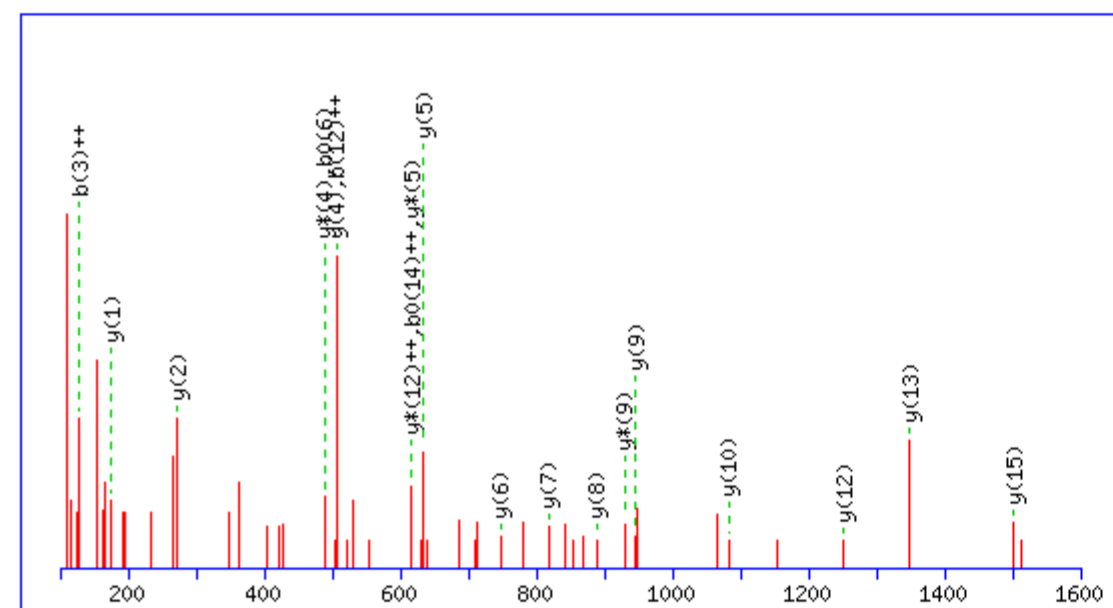

Monoisotopic mass of neutral peptide Mr(calc): 1756.912140

Fixed modifications: Propionamide (C) (apply to specified residues or termini only)

Ions Score: 60 Expect: 5.9e-006

Matches: 20/144 fragment ions using 44 most intense peaks [\(help\)](#)

| #  | b           | b <sup>++</sup> | b <sup>*</sup> | b <sup>*++</sup> | b <sup>0</sup> | b <sup>0++</sup> | Seq. | y           | y <sup>++</sup> | y <sup>*</sup> | y <sup>*++</sup> | y <sup>0</sup> | y <sup>0++</sup> | #  |
|----|-------------|-----------------|----------------|------------------|----------------|------------------|------|-------------|-----------------|----------------|------------------|----------------|------------------|----|
| 1  | 58.028740   | 29.518008       |                |                  |                |                  | G    |             |                 |                |                  |                |                  | 18 |
| 2  | 159.076419  | 80.041847       |                |                  | 141.065854     | 71.036565        | T    | 1700.897951 | 850.952614      | 1683.871402    | 842.439339       | 1682.887386    | 841.947331       | 17 |
| 3  | 256.129183  | 128.568230      |                |                  | 238.118618     | 119.562947       | P    | 1599.850272 | 800.428774      | 1582.823723    | 791.915500       |                |                  | 16 |
| 4  | 313.150647  | 157.078961      |                |                  | 295.140082     | 148.073679       | G    | 1502.797508 | 751.902392      | 1485.770959    | 743.389118       |                |                  | 15 |
| 5  | 410.203411  | 205.605344      |                |                  | 392.192846     | 196.600061       | P    | 1445.776044 | 723.391660      | 1428.749495    | 714.878386       |                |                  | 14 |
| 6  | 507.256175  | 254.131726      |                |                  | 489.245610     | 245.126443       | P    | 1348.723280 | 674.865278      | 1331.696731    | 666.352004       |                |                  | 13 |
| 7  | 604.308939  | 302.658108      |                |                  | 586.298374     | 293.652825       | P    | 1251.670516 | 626.338896      | 1234.643967    | 617.825622       |                |                  | 12 |
| 8  | 675.346053  | 338.176665      |                |                  | 657.335488     | 329.171382       | A    | 1154.617752 | 577.812514      | 1137.591203    | 569.299240       |                |                  | 11 |
| 9  | 812.404965  | 406.706121      |                |                  | 794.394400     | 397.700838       | H    | 1083.580638 | 542.293957      | 1066.554089    | 533.780683       |                |                  | 10 |
| 10 | 869.426429  | 435.216853      |                |                  | 851.415864     | 426.211570       | G    | 946.521726  | 473.764501      | 929.495177     | 465.251227       |                |                  | 9  |
| 11 | 940.463543  | 470.735410      |                |                  | 922.452978     | 461.730127       | A    | 889.500262  | 445.253769      | 872.473713     | 436.740495       |                |                  | 8  |
| 12 | 1011.500657 | 506.253967      |                |                  | 993.490092     | 497.248684       | A    | 818.463148  | 409.735212      | 801.436599     | 401.221938       |                |                  | 7  |
| 13 | 1124.584721 | 562.795999      |                |                  | 1106.574156    | 553.790716       | L    | 747.426034  | 374.216655      | 730.399485     | 365.703381       |                |                  | 6  |
| 14 | 1252.643299 | 626.825288      | 1235.616750    | 618.312013       | 1234.632734    | 617.820005       | Q    | 634.341970  | 317.674623      | 617.315421     | 309.161349       |                |                  | 5  |
| 15 | 1349.696063 | 675.351670      | 1332.669514    | 666.838395       | 1331.685498    | 666.346387       | P    | 506.283392  | 253.645334      | 489.256843     | 245.132059       |                |                  | 4  |
| 16 | 1486.754975 | 743.881126      | 1469.728426    | 735.367851       | 1468.744410    | 734.875843       | H    | 409.230628  | 205.118952      | 392.204079     | 196.605677       |                |                  | 3  |
| 17 | 1583.807739 | 792.407508      | 1566.781190    | 783.894233       | 1565.797174    | 783.402225       | P    | 272.171716  | 136.589496      | 255.145167     | 128.076221       |                |                  | 2  |
| 18 |             |                 |                |                  |                |                  | R    | 175.118952  | 88.063114       | 158.092403     | 79.549839        |                |                  | 1  |

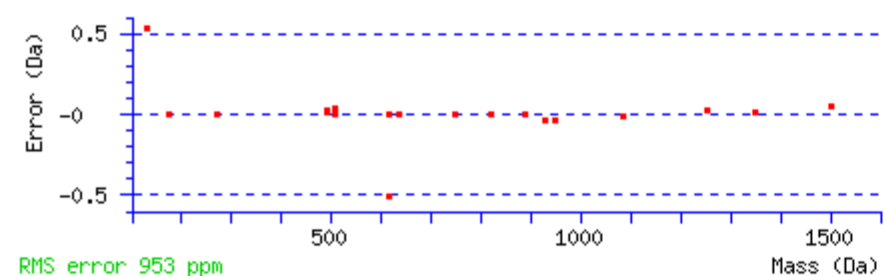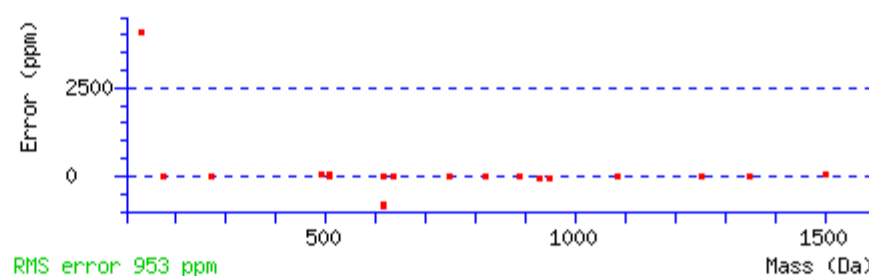

NCBI BLAST search of [GTPGPPPAHGAALQPHPR](#)

(Parameters: blastp, nr protein database, expect=20000, no filter, PAM30)

Other BLAST [web gateways](#)

All matches to this query

| Score | Mr(calc):   | Delta     | Sequence                           |
|-------|-------------|-----------|------------------------------------|
| 59.5  | 1756.912140 | -0.006924 | <a href="#">GTPGPPPAHGAALQPHPR</a> |
| 2.9   | 1756.922012 | -0.016796 | <a href="#">HATAYRVVIESLQDR</a>    |

Mascot: <http://www.matrixscience.com/>

# MASCOT Search Results

## Peptide View

MS/MS Fragmentation of **MEVFKILNK**

Found in **TAP26\_HUMAN**, Thyroid transcription factor 1-associated protein 26 OS=Homo sapiens GN=CCDC59 PE=1 SV=2

Match to Query 22899: 1120.622268 from(561.318410,2+) rtinseconds(3350) index(37258)

Title: Locus:1.1.1.2635.7

Data file 2011-11-14 - TFD - EP 8-7.mgf

Click mouse within plot area to zoom in by factor of two about that point

Or, Plot from  to  Da

Label all possible matches  Label matches used for scoring

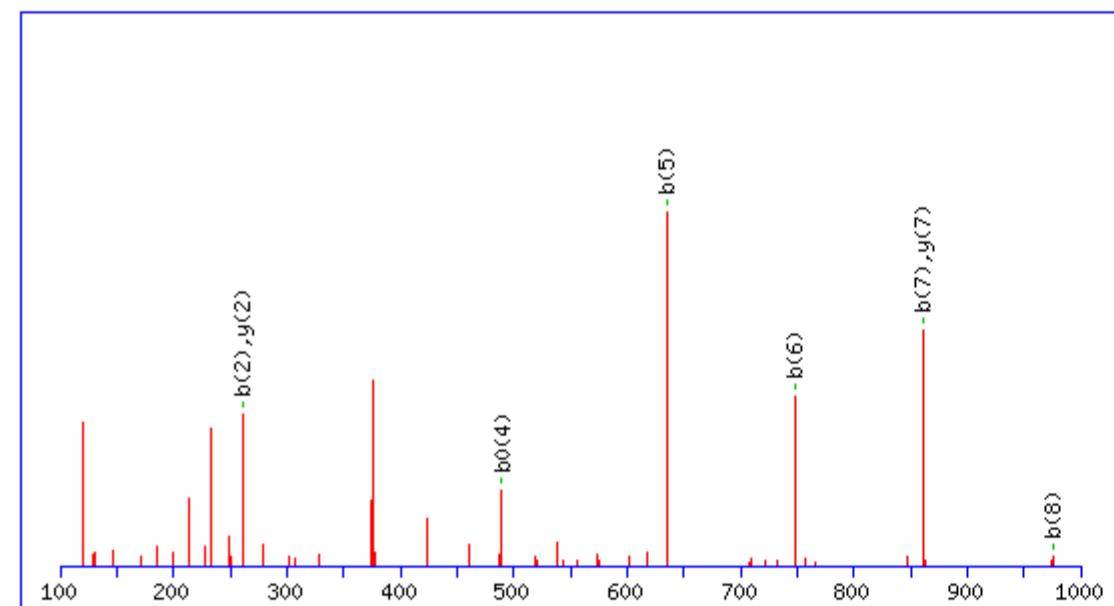

Monoisotopic mass of neutral peptide Mr(calc): 1120.631424

Fixed modifications: Propionamide (C) (apply to specified residues or termini only)

Ions Score: 36 Expect: 0.0017

Matches : 8/72 fragment ions using 9 most intense peaks ([help](#))

| # | b                 | b <sup>++</sup> | b <sup>*</sup> | b <sup>*++</sup> | b <sup>0</sup>    | b <sup>0++</sup> | Seq.     | y                 | y <sup>++</sup> | y <sup>*</sup> | y <sup>*++</sup> | y <sup>0</sup> | y <sup>0++</sup> | # |
|---|-------------------|-----------------|----------------|------------------|-------------------|------------------|----------|-------------------|-----------------|----------------|------------------|----------------|------------------|---|
| 1 | 132.047761        | 66.527518       |                |                  |                   |                  | <b>M</b> |                   |                 |                |                  |                |                  | 9 |
| 2 | <b>261.090354</b> | 131.048815      |                |                  | 243.079789        | 122.043533       | <b>E</b> | 990.598243        | 495.802760      | 973.571694     | 487.289485       | 972.587678     | 486.797477       | 8 |
| 3 | 360.158768        | 180.583022      |                |                  | 342.148203        | 171.577740       | <b>V</b> | <b>861.555650</b> | 431.281463      | 844.529101     | 422.768189       |                |                  | 7 |
| 4 | 507.227182        | 254.117229      |                |                  | <b>489.216617</b> | 245.111947       | <b>F</b> | 762.487236        | 381.747256      | 745.460687     | 373.233982       |                |                  | 6 |
| 5 | <b>635.322145</b> | 318.164711      | 618.295596     | 309.651436       | 617.311580        | 309.159428       | <b>K</b> | 615.418822        | 308.213049      | 598.392273     | 299.699775       |                |                  | 5 |
| 6 | <b>748.406209</b> | 374.706743      | 731.379660     | 366.193468       | 730.395644        | 365.701460       | <b>I</b> | 487.323859        | 244.165567      | 470.297310     | 235.652293       |                |                  | 4 |
| 7 | <b>861.490273</b> | 431.248775      | 844.463724     | 422.735500       | 843.479708        | 422.243492       | <b>L</b> | 374.239795        | 187.623535      | 357.213246     | 179.110261       |                |                  | 3 |
| 8 | <b>975.533200</b> | 488.270238      | 958.506651     | 479.756964       | 957.522635        | 479.264956       | <b>N</b> | <b>261.155731</b> | 131.081503      | 244.129182     | 122.568229       |                |                  | 2 |
| 9 |                   |                 |                |                  |                   |                  | <b>K</b> | 147.112804        | 74.060040       | 130.086255     | 65.546765        |                |                  | 1 |

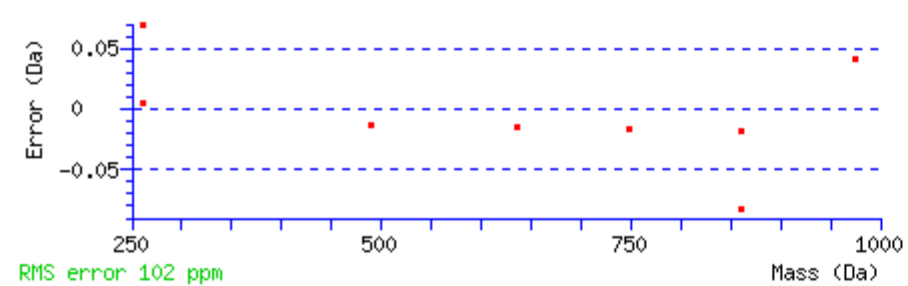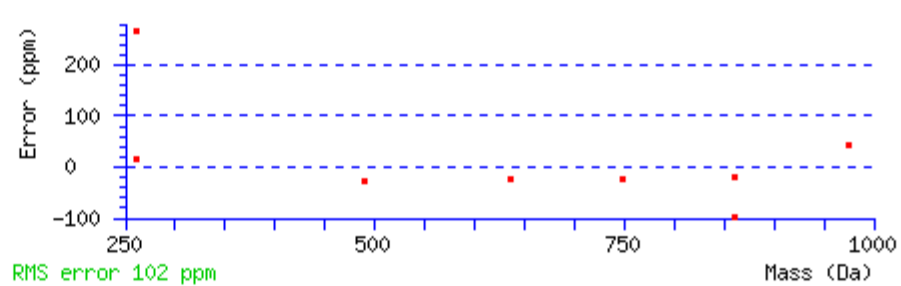

NCBI BLAST search of [MEVFKILNK](#)

(Parameters: blastp, nr protein database, expect=20000, no filter, PAM30)

Other BLAST [web gateways](#)

## All matches to this query

| Score | Mr(calc):   | Delta     | Sequence                    |
|-------|-------------|-----------|-----------------------------|
| 36.4  | 1120.631424 | -0.009156 | <a href="#">MEVFKILNK</a>   |
| 19.9  | 1120.620209 | 0.002059  | <a href="#">FLILPDMLK</a>   |
| 17.1  | 1120.631424 | -0.009156 | <a href="#">MLLLFELAR</a>   |
| 7.0   | 1120.612823 | 0.009445  | <a href="#">LVSAVVEYGGK</a> |
| 6.9   | 1120.624023 | -0.001755 | <a href="#">LVELYRSNK</a>   |
| 6.8   | 1120.624023 | -0.001755 | <a href="#">FLAREASSLK</a>  |
| 5.4   | 1120.612808 | 0.009460  | <a href="#">FIEELKGGTK</a>  |
| 5.4   | 1120.631439 | -0.009171 | <a href="#">FQLMTAGIIK</a>  |
| 2.1   | 1120.612793 | 0.009475  | <a href="#">ITKFIENK</a>    |
| 1.0   | 1120.628067 | -0.005799 | <a href="#">LFSFPAAKPK</a>  |

Mascot: <http://www.matrixscience.com/>

# Mascot Search Results

## Peptide View

MS/MS Fragmentation of **DGLIVPIFQER**

Found in **FUCO\_HUMAN**, Tissue alpha-L-fucosidase OS=Homo sapiens GN=FUCA1 PE=1 SV=4

Match to Query 31796: 1285.697588 from(643.856070,2+) rtinseconds(3477) index(50995)

Title: Locus:1.1.1.2873.14

Data file 2011-11-13 - TFD - EP 7-3.mgf

Click mouse within plot area to zoom in by factor of two about that point

Or, Plot from  to  Da

Label all possible matches  Label matches used for scoring

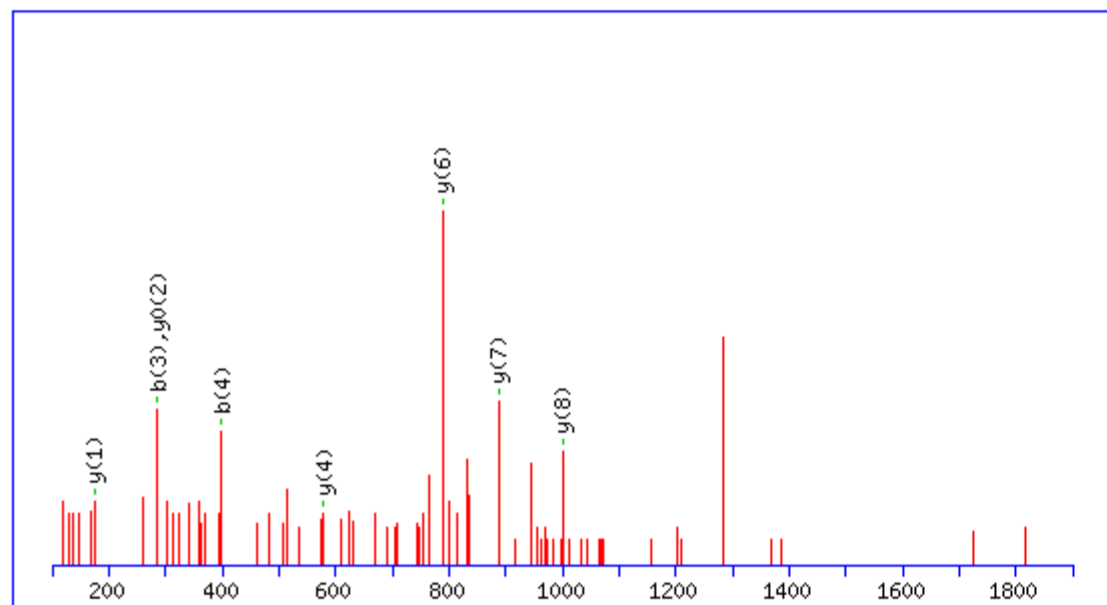

Monoisotopic mass of neutral peptide Mr(calc): 1285.703033

Fixed modifications: Propionamide (C) (apply to specified residues or termini only)

Ions Score: 34 Expect: 0.0051

Matches: 8/102 fragment ions using 11 most intense peaks ([help](#))

| #  | b                 | b <sup>++</sup> | b*          | b <sup>+++</sup> | b <sup>0</sup> | b <sup>0++</sup> | Seq. | y                  | y <sup>++</sup> | y*          | y <sup>+++</sup> | y <sup>0</sup>    | y <sup>0++</sup> | #  |
|----|-------------------|-----------------|-------------|------------------|----------------|------------------|------|--------------------|-----------------|-------------|------------------|-------------------|------------------|----|
| 1  | 116.034219        | 58.520748       |             |                  | 98.023654      | 49.515465        | D    |                    |                 |             |                  |                   |                  | 11 |
| 2  | 173.055683        | 87.031479       |             |                  | 155.045118     | 78.026197        | G    | 1171.683371        | 586.345324      | 1154.656822 | 577.832049       | 1153.672806       | 577.340041       | 10 |
| 3  | <b>286.139747</b> | 143.573512      |             |                  | 268.129182     | 134.568229       | L    | 1114.661907        | 557.834592      | 1097.635358 | 549.321317       | 1096.651342       | 548.829309       | 9  |
| 4  | <b>399.223811</b> | 200.115544      |             |                  | 381.213246     | 191.110261       | I    | <b>1001.577843</b> | 501.292560      | 984.551294  | 492.779285       | 983.567278        | 492.287277       | 8  |
| 5  | 498.292225        | 249.649751      |             |                  | 480.281660     | 240.644468       | V    | <b>888.493779</b>  | 444.750528      | 871.467230  | 436.237253       | 870.483214        | 435.745245       | 7  |
| 6  | 595.344989        | 298.176133      |             |                  | 577.334424     | 289.170850       | P    | <b>789.425365</b>  | 395.216321      | 772.398816  | 386.703046       | 771.414800        | 386.211038       | 6  |
| 7  | 708.429053        | 354.718165      |             |                  | 690.418488     | 345.712882       | I    | 692.372601         | 346.689939      | 675.346052  | 338.176664       | 674.362036        | 337.684656       | 5  |
| 8  | 855.497467        | 428.252372      |             |                  | 837.486902     | 419.247089       | F    | <b>579.288537</b>  | 290.147907      | 562.261988  | 281.634632       | 561.277972        | 281.142624       | 4  |
| 9  | 983.556045        | 492.281661      | 966.529496  | 483.768386       | 965.545480     | 483.276378       | Q    | 432.220123         | 216.613700      | 415.193574  | 208.100425       | 414.209558        | 207.608417       | 3  |
| 10 | 1112.598638       | 556.802957      | 1095.572089 | 548.289683       | 1094.588073    | 547.797675       | E    | 304.161545         | 152.584411      | 287.134996  | 144.071136       | <b>286.150980</b> | 143.579128       | 2  |
| 11 |                   |                 |             |                  |                |                  | R    | <b>175.118952</b>  | 88.063114       | 158.092403  | 79.549839        |                   |                  | 1  |

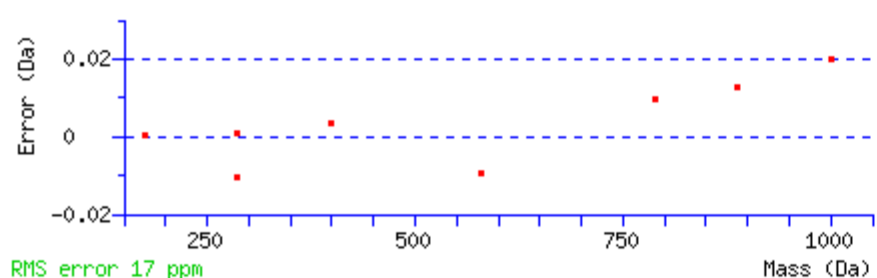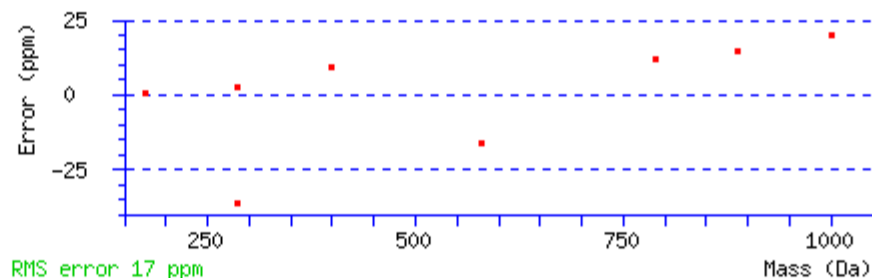

NCBI BLAST search of [DGLIVPIFQER](#)

(Parameters: blastp, nr protein database, expect=20000, no filter, PAM30)

Other BLAST [web gateways](#)

All matches to this query

| Score | Mr(calc):   | Delta     | Sequence                     |
|-------|-------------|-----------|------------------------------|
| 34.0  | 1285.703033 | -0.005445 | <a href="#">DGLIVPIFQER</a>  |
| 11.3  | 1285.703033 | -0.005445 | <a href="#">WVLVGAPKADSK</a> |
| 9.5   | 1285.687759 | 0.009829  | <a href="#">DAVLKVVVEER</a>  |
| 0.8   | 1285.703018 | -0.005430 | <a href="#">AITPPQOPYKK</a>  |
| 0.8   | 1285.703033 | -0.005445 | <a href="#">WVINPSGGLISK</a> |

# MASCOT SCIENCE Mascot Search Results

## Peptide View

MS/MS Fragmentation of **TTQEQLKR**

Found in **TLR10\_HUMAN**, Toll-like receptor 10 OS=Homo sapiens GN=TLR10 PE=1 SV=2

Match to Query 15641: 1002.546528 from(502.280540,2+) rtinseconds(1310) index(6079)

Title: Locus:1.1.1.2144.31

Data file 2011-11-12 - TFD - EP 5-2.mgf

Click mouse within plot area to zoom in by factor of two about that point

Or, Plot from  to  Da

Label all possible matches  Label matches used for scoring

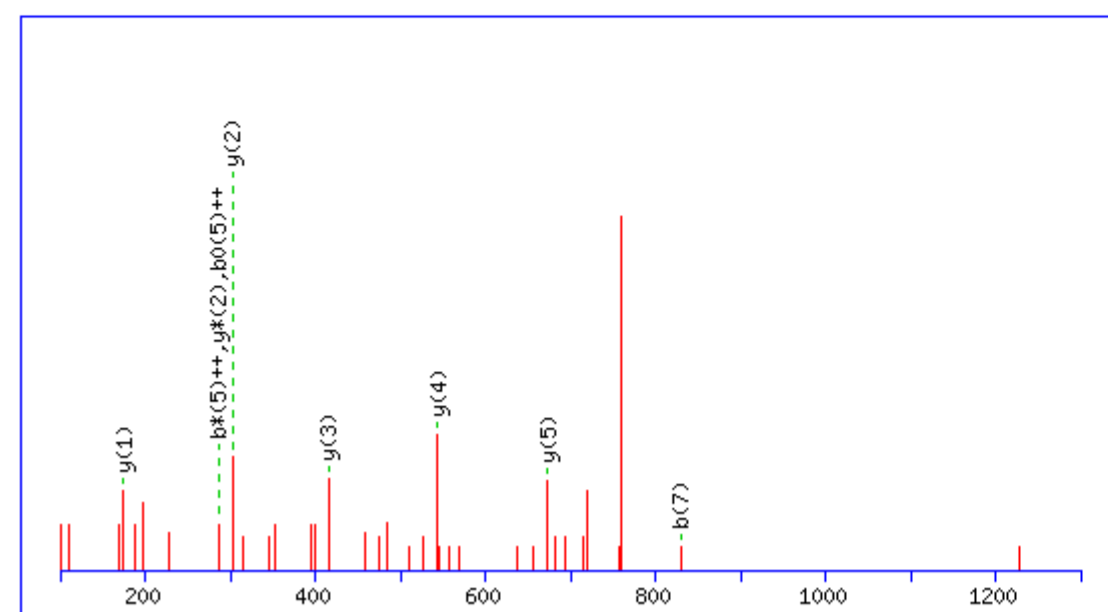

Monoisotopic mass of neutral peptide Mr(calc): 1002.545792

Fixed modifications: Propionamide (C) (apply to specified residues or termini only)

Ions Score: 39 Expect: 0.0014

Matches : 9/72 fragment ions using 8 most intense peaks ([help](#))

| # | b                 | b <sup>++</sup> | b <sup>*</sup> | b <sup>*++</sup>  | b <sup>0</sup> | b <sup>0++</sup>  | Seq. | y                 | y <sup>++</sup> | y <sup>*</sup>    | y <sup>*++</sup> | y <sup>0</sup> | y <sup>0++</sup> | # |
|---|-------------------|-----------------|----------------|-------------------|----------------|-------------------|------|-------------------|-----------------|-------------------|------------------|----------------|------------------|---|
| 1 | 102.054955        | 51.531116       |                |                   | 84.044390      | 42.525833         | T    |                   |                 |                   |                  |                |                  | 8 |
| 2 | 203.102634        | 102.054955      |                |                   | 185.092069     | 93.049672         | T    | 902.505407        | 451.756342      | 885.478858        | 443.243067       | 884.494842     | 442.751059       | 7 |
| 3 | 331.161212        | 166.084244      | 314.134663     | 157.570970        | 313.150647     | 157.078962        | Q    | 801.457728        | 401.232502      | 784.431179        | 392.719228       | 783.447163     | 392.227220       | 6 |
| 4 | 460.203805        | 230.605541      | 443.177256     | 222.092266        | 442.193240     | 221.600258        | E    | <b>673.399150</b> | 337.203213      | 656.372601        | 328.689939       | 655.388585     | 328.197931       | 5 |
| 5 | 588.262383        | 294.634830      | 571.235834     | <b>286.121555</b> | 570.251818     | <b>285.629547</b> | Q    | <b>544.356557</b> | 272.681917      | 527.330008        | 264.168642       |                |                  | 4 |
| 6 | 701.346447        | 351.176862      | 684.319898     | 342.663587        | 683.335882     | 342.171579        | L    | <b>416.297979</b> | 208.652627      | 399.271430        | 200.139353       |                |                  | 3 |
| 7 | <b>829.441410</b> | 415.224343      | 812.414861     | 406.711069        | 811.430845     | 406.219061        | K    | <b>303.213915</b> | 152.110595      | <b>286.187366</b> | 143.597321       |                |                  | 2 |
| 8 |                   |                 |                |                   |                |                   | R    | <b>175.118952</b> | 88.063114       | 158.092403        | 79.549839        |                |                  | 1 |

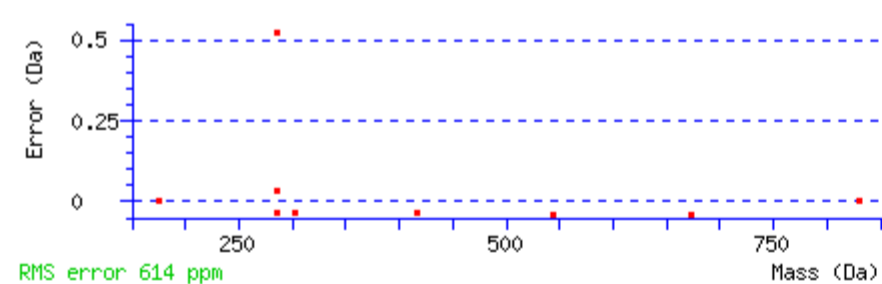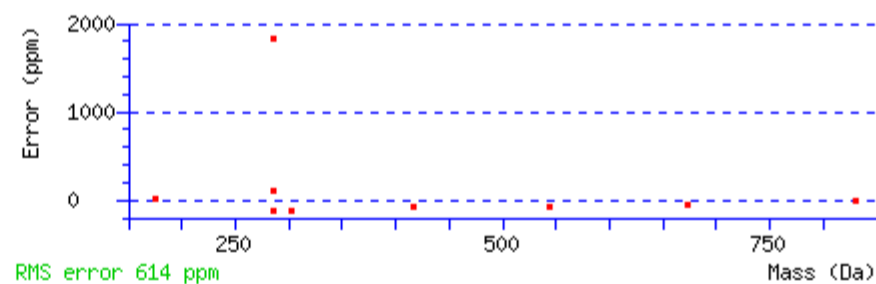

NCBI BLAST search of [TTQEQLKR](#)

(Parameters: blastp, nr protein database, expect=20000, no filter, PAM30)

Other BLAST [web gateways](#)

All matches to this query

| Score | Mr(calc):   | Delta     | Sequence                   |
|-------|-------------|-----------|----------------------------|
| 38.6  | 1002.545792 | 0.000736  | <a href="#">TTQEQLKR</a>   |
| 37.7  | 1002.545792 | 0.000736  | <a href="#">SSALGKEVGR</a> |
| 13.1  | 1002.545792 | 0.000736  | <a href="#">NSTGVEIKR</a>  |
| 9.6   | 1002.549820 | -0.003292 | <a href="#">IPPTYQIR</a>   |
| 9.1   | 1002.545792 | 0.000736  | <a href="#">ADKTLATQR</a>  |
| 8.0   | 1002.553192 | -0.006664 | <a href="#">IIDIVMQR</a>   |
| 8.0   | 1002.553192 | -0.006664 | <a href="#">LPMILTQR</a>   |
| 7.1   | 1002.549835 | -0.003307 | <a href="#">AITLFPPGR</a>  |
| 6.7   | 1002.545792 | 0.000736  | <a href="#">TVLENSGKR</a>  |
| 2.9   | 1002.543274 | 0.003254  | <a href="#">HILYCKR</a>    |

**MASCOT** **SCIENCE** Mascot Search Results

**Peptide View**

MS/MS Fragmentation of **LQTLDLR**

Found in **TLR5\_HUMAN**, Toll-like receptor 5 OS=Homo sapiens GN=TLR5 PE=1 SV=4

Match to Query 4403: 857.496708 from(429.755630,2+) rtinseconds(1902) index(20116)

Title: Locus:1.1.1.2154.7

Data file 2011-11-10 - TFD - EP 3-1.mgf

Click mouse within plot area to zoom in by factor of two about that point

Or, Plot from  to  Da

Label all possible matches  Label matches used for scoring

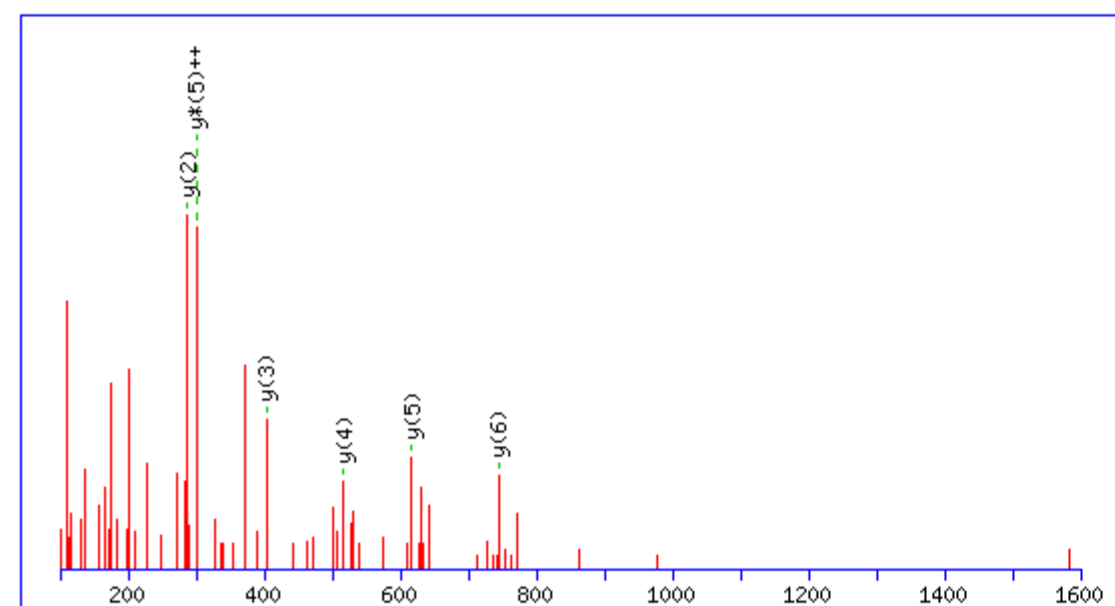

Monoisotopic mass of neutral peptide Mr(calc): 857.497055

Fixed modifications: Propionamide (C) (apply to specified residues or termini only)

Ions Score: 45 Expect: 0.00042

Matches : 6/62 fragment ions using 7 most intense peaks ([help](#))

| # | b          | b <sup>++</sup> | b <sup>*</sup> | b <sup>*++</sup> | b <sup>0</sup> | b <sup>0++</sup> | Seq. | y          | y <sup>++</sup> | y <sup>*</sup> | y <sup>*++</sup> | y <sup>0</sup> | y <sup>0++</sup> | # |
|---|------------|-----------------|----------------|------------------|----------------|------------------|------|------------|-----------------|----------------|------------------|----------------|------------------|---|
| 1 | 114.091340 | 57.549308       |                |                  |                |                  | L    |            |                 |                |                  |                |                  | 7 |
| 2 | 242.149918 | 121.578597      | 225.123369     | 113.065323       |                |                  | Q    | 745.420280 | 373.213778      | 728.393731     | 364.700504       | 727.409715     | 364.208496       | 6 |
| 3 | 343.197597 | 172.102437      | 326.171048     | 163.589162       | 325.187032     | 163.097154       | T    | 617.361702 | 309.184489      | 600.335153     | 300.671215       | 599.351137     | 300.179207       | 5 |
| 4 | 456.281661 | 228.644469      | 439.255112     | 220.131194       | 438.271096     | 219.639186       | L    | 516.314023 | 258.660650      | 499.287474     | 250.147375       | 498.303458     | 249.655367       | 4 |
| 5 | 571.308604 | 286.157940      | 554.282055     | 277.644666       | 553.298039     | 277.152658       | D    | 403.229959 | 202.118618      | 386.203410     | 193.605343       | 385.219394     | 193.113335       | 3 |
| 6 | 684.392668 | 342.699972      | 667.366119     | 334.186698       | 666.382103     | 333.694690       | L    | 288.203016 | 144.605146      | 271.176467     | 136.091872       |                |                  | 2 |
| 7 |            |                 |                |                  |                |                  | R    | 175.118952 | 88.063114       | 158.092403     | 79.549840        |                |                  | 1 |

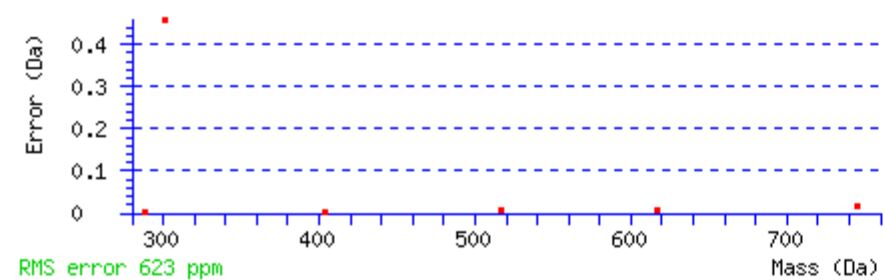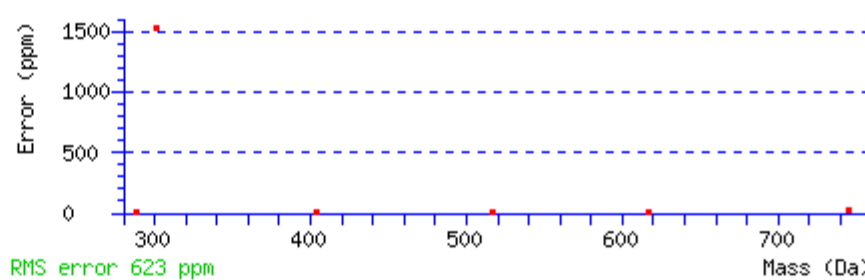

NCBI BLAST search of **LQTLDLR**

(Parameters: blastp, nr protein database, expect=20000, no filter, PAM30)

Other BLAST [web gateways](#)

All matches to this query

| Score | Mr(calc):  | Delta     | Sequence                 |
|-------|------------|-----------|--------------------------|
| 45.4  | 857.497055 | -0.000347 | <a href="#">LQTLDLR</a>  |
| 30.6  | 857.497055 | -0.000347 | <a href="#">LKDPTRLR</a> |
| 30.6  | 857.497055 | -0.000347 | <a href="#">LQDLTLR</a>  |
| 27.5  | 857.497055 | -0.000347 | <a href="#">LGATILDR</a> |
| 18.7  | 857.497025 | -0.000317 | <a href="#">LKAEEIR</a>  |
| 17.6  | 857.497055 | -0.000347 | <a href="#">IQDILTR</a>  |
| 15.1  | 857.497055 | -0.000347 | <a href="#">VEQLTLR</a>  |
| 14.6  | 857.497055 | -0.000347 | <a href="#">LKDEVVR</a>  |
| 13.6  | 857.497055 | -0.000347 | <a href="#">QLTLQOK</a>  |
| 13.6  | 857.497055 | -0.000347 | <a href="#">DITQLLR</a>  |

# **Mascot Search Results**

## Peptide View

MS/MS Fragmentation of **EAPAPASNPSGR**

Found in **TMIL2\_HUMAN**, TOM1-like protein 2 OS=Homo sapiens GN=TOM1L2 PE=1 SV=1

Match to Query 462155: 1152.552708 from(577.283630,2+) rtinseconds(838) index(240773)

Title: Locus:1.1.1.758.28

Data file C:\Program Files (x86)\Matrix Science\Mascot Daemon\mgf3 TFD - Epitel - R2\mascot\_daemon\_merge.mgf

Click mouse within plot area to zoom in by factor of two about that point

Or, Plot from  to  Da

Label all possible matches  Label matches used for scoring

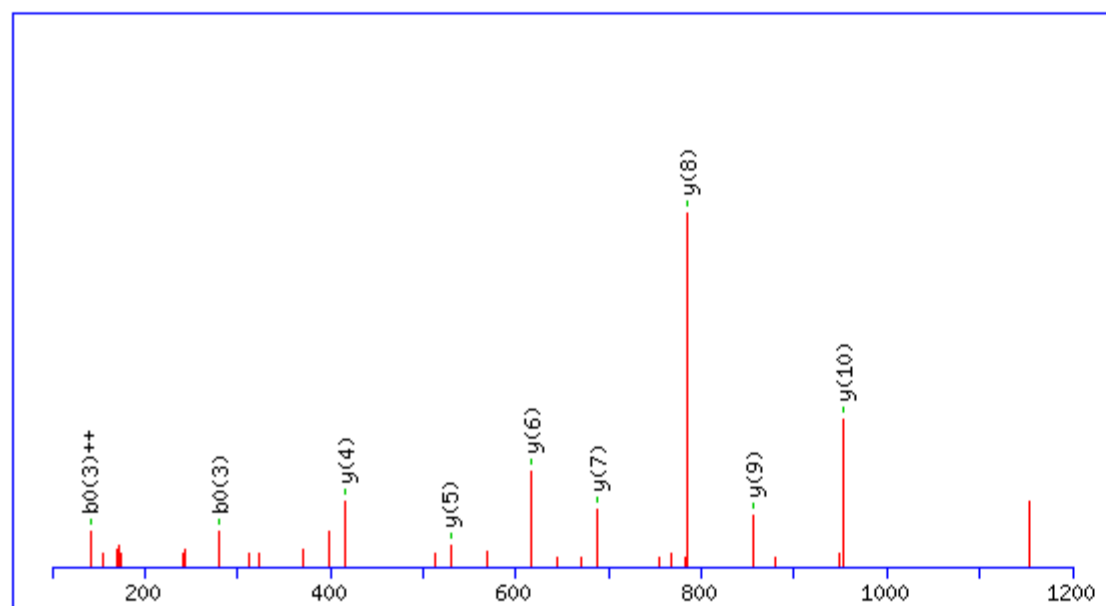

Monoisotopic mass of neutral peptide Mr(calc): 1152.552322

Fixed modifications: Carbamidomethyl (C) (apply to specified residues or termini only)

Ions Score: 64 Expect: 6e-006

Matches : 9/114 fragment ions using 9 most intense peaks ([help](#))

| #  | b          | b <sup>++</sup> | b <sup>*</sup> | b <sup>*++</sup> | b <sup>0</sup> | b <sup>0++</sup> | Seq. | y           | y <sup>++</sup> | y <sup>*</sup> | y <sup>*++</sup> | y <sup>0</sup> | y <sup>0++</sup> | #  |
|----|------------|-----------------|----------------|------------------|----------------|------------------|------|-------------|-----------------|----------------|------------------|----------------|------------------|----|
| 1  | 130.049869 | 65.528572       |                |                  | 112.039304     | 56.523290        | E    |             |                 |                |                  |                |                  | 12 |
| 2  | 201.086983 | 101.047130      |                |                  | 183.076418     | 92.041847        | A    | 1024.517033 | 512.762154      | 1007.490484    | 504.248880       | 1006.506468    | 503.756872       | 11 |
| 3  | 298.139747 | 149.573512      |                |                  | 280.129182     | 140.568229       | P    | 953.479919  | 477.243598      | 936.453370     | 468.730323       | 935.469354     | 468.238315       | 10 |
| 4  | 369.176861 | 185.092068      |                |                  | 351.166296     | 176.086786       | A    | 856.427155  | 428.717216      | 839.400606     | 420.203941       | 838.416590     | 419.711933       | 9  |
| 5  | 466.229625 | 233.618450      |                |                  | 448.219060     | 224.613168       | P    | 785.390041  | 393.198659      | 768.363492     | 384.685384       | 767.379476     | 384.193376       | 8  |
| 6  | 537.266739 | 269.137008      |                |                  | 519.256174     | 260.131725       | A    | 688.337277  | 344.672277      | 671.310728     | 336.159002       | 670.326712     | 335.666994       | 7  |
| 7  | 624.298767 | 312.653022      |                |                  | 606.288202     | 303.647739       | S    | 617.300163  | 309.153720      | 600.273614     | 300.640445       | 599.289598     | 300.148437       | 6  |
| 8  | 738.341694 | 369.674485      | 721.315145     | 361.161210       | 720.331129     | 360.669202       | N    | 530.268135  | 265.637706      | 513.241586     | 257.124431       | 512.257570     | 256.632423       | 5  |
| 9  | 835.394458 | 418.200867      | 818.367909     | 409.687592       | 817.383893     | 409.195585       | P    | 416.225208  | 208.616242      | 399.198659     | 200.102967       | 398.214643     | 199.610959       | 4  |
| 10 | 922.426486 | 461.716881      | 905.399937     | 453.203606       | 904.415921     | 452.711598       | S    | 319.172444  | 160.089860      | 302.145895     | 151.576585       | 301.161879     | 151.084577       | 3  |
| 11 | 979.447950 | 490.227613      | 962.421401     | 481.714339       | 961.437385     | 481.222331       | G    | 232.140416  | 116.573846      | 215.113867     | 108.060571       |                |                  | 2  |
| 12 |            |                 |                |                  |                |                  | R    | 175.118952  | 88.063114       | 158.092403     | 79.549839        |                |                  | 1  |

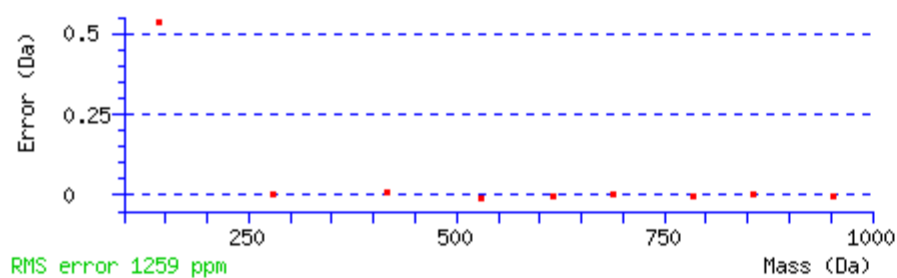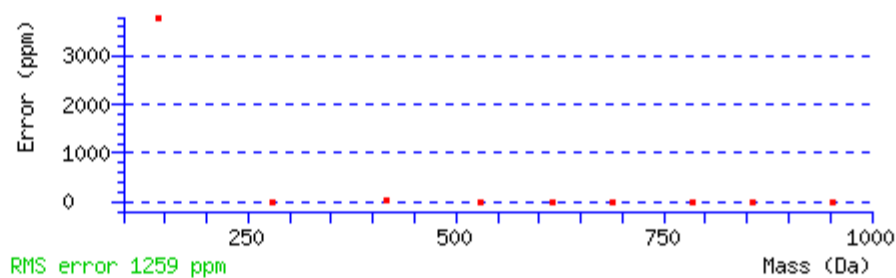

NCBI BLAST search of **EAPAPASNPSGR**

(Parameters: blastp, nr protein database, expect=20000, no filter, PAM30)

Other BLAST [web gateways](#)

All matches to this query

| Score | Mr(calc):   | Delta     | Sequence                     |
|-------|-------------|-----------|------------------------------|
| 63.7  | 1152.552322 | 0.000386  | <a href="#">EAPAPASNPSGR</a> |
| 11.2  | 1152.563568 | -0.010860 | <a href="#">ERPAPGNAGPR</a>  |
| 5.5   | 1152.563568 | -0.010860 | <a href="#">ERPAPGNAGPR</a>  |

Mascot: <http://www.matrixscience.com/>

# **MATRIX** SCIENCE Mascot Search Results

## Peptide View

### MS/MS Fragmentation of **VTLLLFK**

Found in **TPRKB\_HUMAN**, TP53RK-binding protein OS=Homo sapiens GN=TPRKB PE=1 SV=1

Match to Query 3454: 832.545988 from(417.280270,2+) rtinseconds(3220) index(38521)

Title: Locus:1.1.1.2493.3

Data file 2011-11-10 - TFD - EP 3-6.mgf

Click mouse within plot area to zoom in by factor of two about that point

Or, Plot from  to  Da

Label all possible matches  Label matches used for scoring

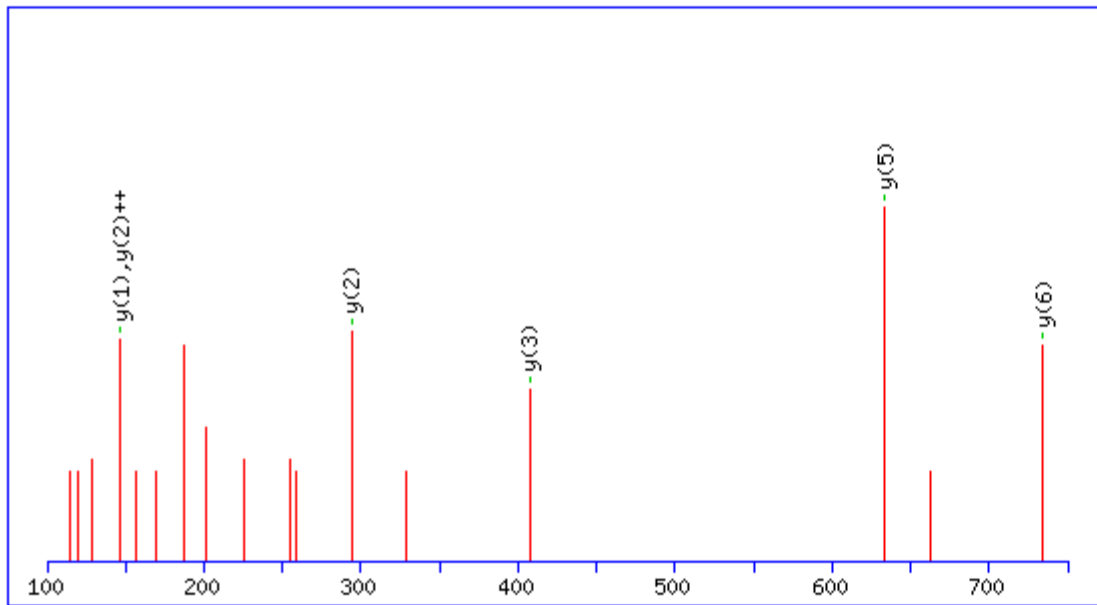

Monoisotopic mass of neutral peptide Mr(calc): 832.542221

Fixed modifications: Propionamide (C) (apply to specified residues or termini only)

Ions Score: 53 Expect: 5e-006

Matches : 6/48 fragment ions using 5 most intense peaks ([help](#))

| # | b          | b <sup>++</sup> | b <sup>0</sup> | b <sup>0++</sup> | Seq. | y                 | y <sup>++</sup>   | y <sup>*</sup> | y <sup>*++</sup> | y <sup>0</sup> | y <sup>0++</sup> | # |
|---|------------|-----------------|----------------|------------------|------|-------------------|-------------------|----------------|------------------|----------------|------------------|---|
| 1 | 100.075690 | 50.541483       |                |                  | V    |                   |                   |                |                  |                |                  | 7 |
| 2 | 201.123369 | 101.065322      | 183.112804     | 92.060040        | T    | <b>734.481089</b> | 367.744183        | 717.454540     | 359.230908       | 716.470524     | 358.738900       | 6 |
| 3 | 314.207433 | 157.607354      | 296.196868     | 148.602072       | L    | <b>633.433410</b> | 317.220343        | 616.406861     | 308.707069       |                |                  | 5 |
| 4 | 427.291497 | 214.149386      | 409.280932     | 205.144104       | L    | 520.349346        | 260.678311        | 503.322797     | 252.165037       |                |                  | 4 |
| 5 | 540.375561 | 270.691419      | 522.364996     | 261.686136       | L    | <b>407.265282</b> | 204.136279        | 390.238733     | 195.623004       |                |                  | 3 |
| 6 | 687.443975 | 344.225626      | 669.433410     | 335.220343       | F    | <b>294.181218</b> | <b>147.594247</b> | 277.154669     | 139.080972       |                |                  | 2 |
| 7 |            |                 |                |                  | K    | <b>147.112804</b> | 74.060040         | 130.086255     | 65.546765        |                |                  | 1 |

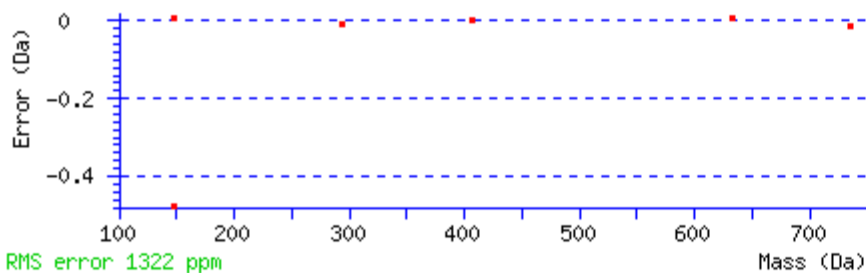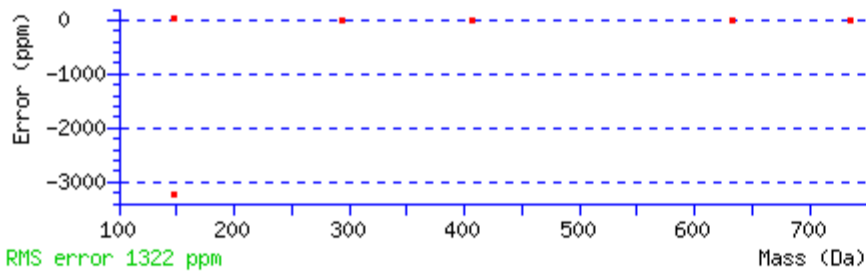

### NCBI BLAST search of **VTLLLFK**

(Parameters: blastp, nr protein database, expect=20000, no filter, PAM30)

Other BLAST [web gateways](#)

### All matches to this query

| Score | Mr(calc):  | Delta    | Sequence                |
|-------|------------|----------|-------------------------|
| 53.0  | 832.542221 | 0.003767 | <a href="#">VTLLLFK</a> |
| 1.9   | 832.542206 | 0.003782 | <a href="#">SLFLIHK</a> |
| 0.3   | 832.542221 | 0.003767 | <a href="#">LTVLFLK</a> |

# MASCOT Search Results

## Peptide View

MS/MS Fragmentation of **AGGLIYQLDSYAPR**

Found in **TPPC4\_HUMAN**, Trafficking protein particle complex subunit 4 OS=Homo sapiens GN=TRAPPC4 PE=1 SV=1

Match to Query 45460: 1522.767788 from(762.391170,2+) rtinseconds(3276) index(44871)

Title: Locus:1.1.1.2561.47

Data file 2011-11-10 - TFD - EP 4-5.mgf

Click mouse within plot area to zoom in by factor of two about that point

Or, Plot from  to  Da

Label all possible matches  Label matches used for scoring

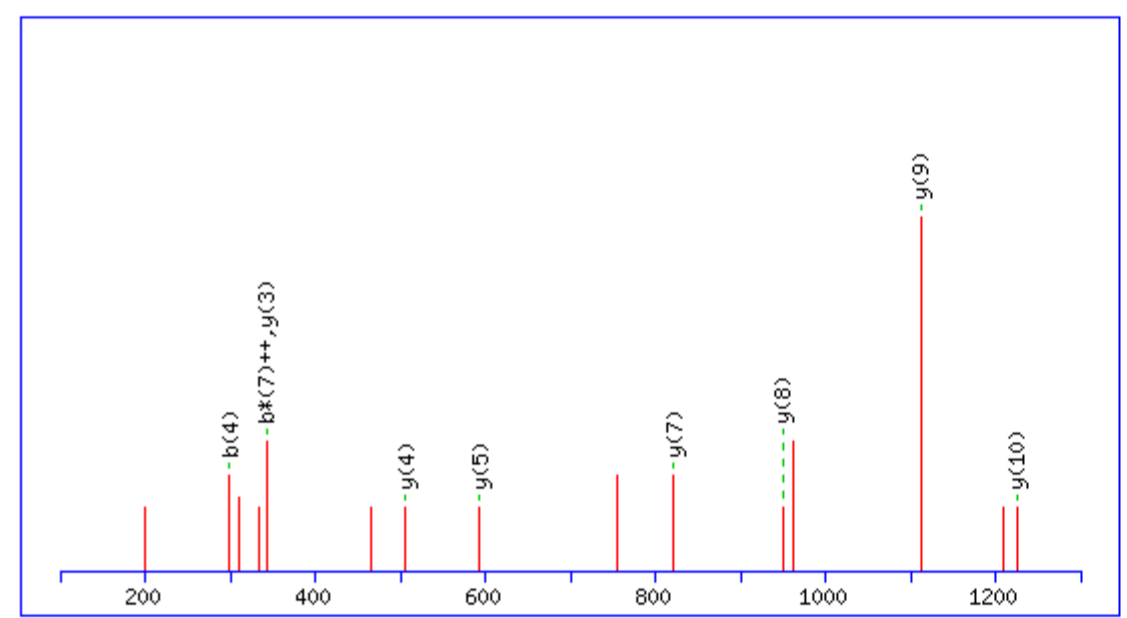

Monoisotopic mass of neutral peptide Mr(calc): 1522.777969

Fixed modifications: Propionamide (C) (apply to specified residues or termini only)

Ions Score: 42 Expect: 0.00021

Matches: 9/120 fragment ions using 15 most intense peaks [\(help\)](#)

| #  | b                 | b <sup>++</sup> | b <sup>*</sup> | b <sup>*++</sup>  | b <sup>0</sup> | b <sup>0++</sup> | Seq. | y                  | y <sup>++</sup> | y <sup>*</sup> | y <sup>*++</sup> | y <sup>0</sup> | y <sup>0++</sup> | #  |
|----|-------------------|-----------------|----------------|-------------------|----------------|------------------|------|--------------------|-----------------|----------------|------------------|----------------|------------------|----|
| 1  | 72.044390         | 36.525833       |                |                   |                |                  | A    |                    |                 |                |                  |                |                  | 14 |
| 2  | 129.065854        | 65.036565       |                |                   |                |                  | G    | 1452.748157        | 726.877717      | 1435.721608    | 718.364442       | 1434.737592    | 717.872434       | 13 |
| 3  | 186.087318        | 93.547297       |                |                   |                |                  | G    | 1395.726693        | 698.366984      | 1378.700144    | 689.853710       | 1377.716128    | 689.361702       | 12 |
| 4  | <b>299.171382</b> | 150.089329      |                |                   |                |                  | L    | 1338.705229        | 669.856252      | 1321.678680    | 661.342978       | 1320.694664    | 660.850970       | 11 |
| 5  | 412.255446        | 206.631361      |                |                   |                |                  | I    | <b>1225.621165</b> | 613.314221      | 1208.594616    | 604.800946       | 1207.610600    | 604.308938       | 10 |
| 6  | 575.318775        | 288.163026      |                |                   |                |                  | Y    | <b>1112.537101</b> | 556.772188      | 1095.510552    | 548.258914       | 1094.526536    | 547.766906       | 9  |
| 7  | 703.377353        | 352.192315      | 686.350804     | <b>343.679040</b> |                |                  | Q    | <b>949.473772</b>  | 475.240524      | 932.447223     | 466.727249       | 931.463207     | 466.235241       | 8  |
| 8  | 816.461417        | 408.734347      | 799.434868     | 400.221072        |                |                  | L    | <b>821.415194</b>  | 411.211235      | 804.388645     | 402.697960       | 803.404629     | 402.205952       | 7  |
| 9  | 931.488360        | 466.247818      | 914.461811     | 457.734544        | 913.477795     | 457.242536       | D    | 708.331130         | 354.669203      | 691.304581     | 346.155928       | 690.320565     | 345.663920       | 6  |
| 10 | 1018.520388       | 509.763832      | 1001.493839    | 501.250558        | 1000.509823    | 500.758550       | S    | <b>593.304187</b>  | 297.155732      | 576.277638     | 288.642457       | 575.293622     | 288.150449       | 5  |
| 11 | 1181.583717       | 591.295497      | 1164.557168    | 582.782222        | 1163.573152    | 582.290214       | Y    | <b>506.272159</b>  | 253.639717      | 489.245610     | 245.126443       |                |                  | 4  |
| 12 | 1252.620831       | 626.814054      | 1235.594282    | 618.300779        | 1234.610266    | 617.808771       | A    | <b>343.208830</b>  | 172.108053      | 326.182281     | 163.594778       |                |                  | 3  |
| 13 | 1349.673595       | 675.340436      | 1332.647046    | 666.827161        | 1331.663030    | 666.335153       | P    | 272.171716         | 136.589496      | 255.145167     | 128.076221       |                |                  | 2  |
| 14 |                   |                 |                |                   |                |                  | R    | 175.118952         | 88.063114       | 158.092403     | 79.549839        |                |                  | 1  |

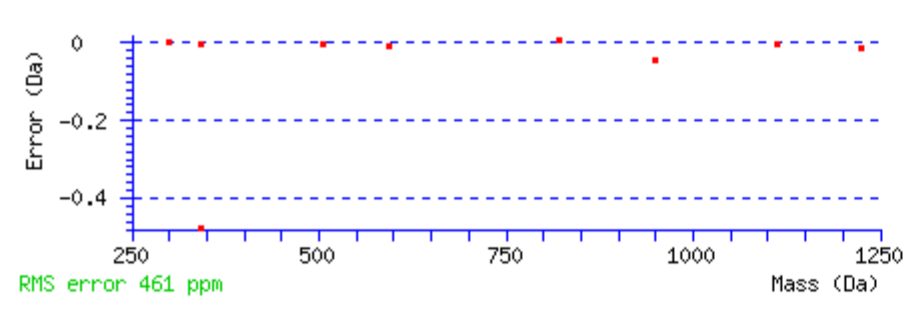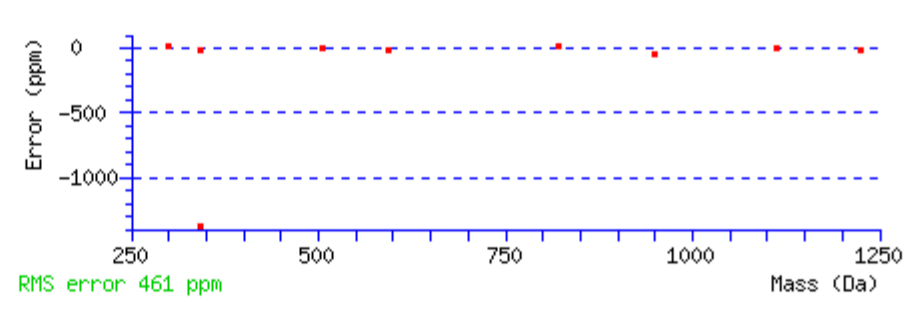

NCBI BLAST search of [AGGLIYQLDSYAPR](#)

(Parameters: blastp, nr protein database, expect=20000, no filter, PAM30)

Other BLAST [web gateways](#)

### All matches to this query

| Score | Mr(calc):   | Delta     | Sequence                        |
|-------|-------------|-----------|---------------------------------|
| 42.3  | 1522.777969 | -0.010181 | <a href="#">AGGLIYQLDSYAPR</a>  |
| 2.9   | 1522.766083 | 0.001705  | <a href="#">QLGISATMLNASSSK</a> |
| 1.2   | 1522.764038 | 0.003750  | <a href="#">HQTTHAEERPYK</a>    |
| 0.3   | 1522.762711 | 0.005077  | <a href="#">QAPVENISPEAPAGK</a> |
| 0.3   | 1522.781342 | -0.013554 | <a href="#">ALNIQSTNMAFGK</a>   |
| 0.0   | 1522.760193 | 0.007595  | <a href="#">WYRAPEIMLNSK</a>    |



# MASCOT Search Results

## Peptide View

MS/MS Fragmentation of **MLPCFQLLR**

Found in **TCF19\_HUMAN**, Transcription factor 19 OS=Homo sapiens GN=TCF19 PE=1 SV=2

Match to Query 30194: 1222.624608 from(612.319580,2+) rtinseconds(4433) index(57105)

Title: Locus:1.1.1.3097.6

Data file 2011-11-13 - TFD - EP 7-5.mgf

Click mouse within plot area to zoom in by factor of two about that point

Or, Plot from  to  Da

Label all possible matches  Label matches used for scoring

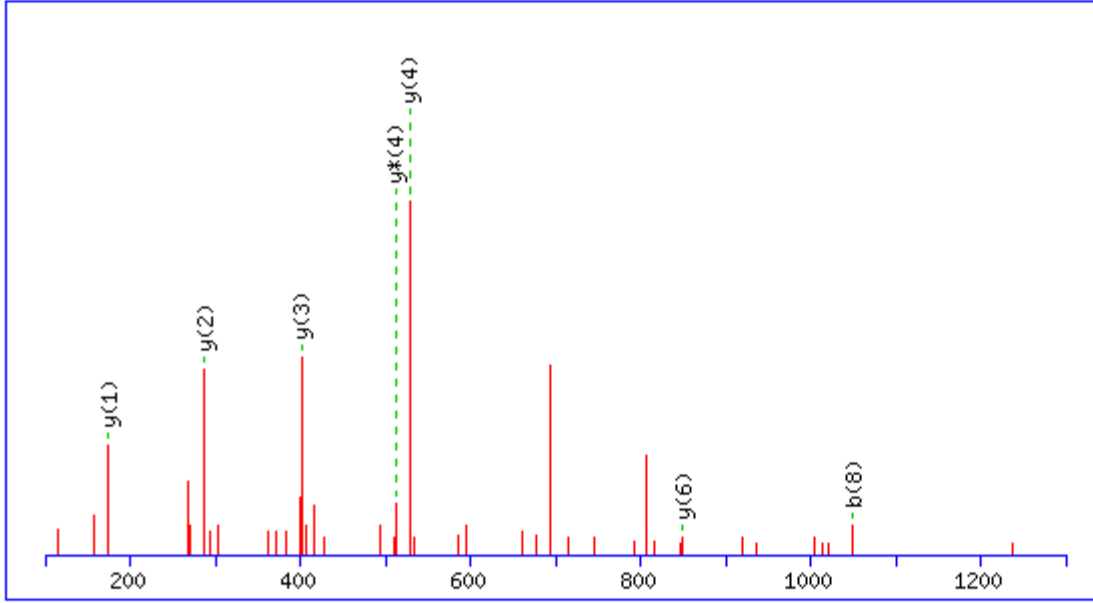

Monoisotopic mass of neutral peptide Mr(calc): 1222.620224

Fixed modifications: Propionamide (C) (apply to specified residues or termini only)

Variable modifications:

M1 : Oxidation (M), with neutral losses 0.000000 (shown in table), 63.998285

P3 : Oxidation (P)

Ions Score: 32 Expect: 0.0083

Matches : 7/76 fragment ions using 10 most intense peaks ([help](#))

| # | b                  | b <sup>++</sup> | b <sup>*</sup> | b <sup>*++</sup> | Seq. | y                 | y <sup>++</sup> | y <sup>*</sup>    | y <sup>*++</sup> | # |
|---|--------------------|-----------------|----------------|------------------|------|-------------------|-----------------|-------------------|------------------|---|
| 1 | 148.042676         | 74.524976       |                |                  | M    |                   |                 |                   |                  | 9 |
| 2 | 261.126740         | 131.067008      |                |                  | L    | 1076.592114       | 538.799695      | 1059.565565       | 530.286421       | 8 |
| 3 | 374.174419         | 187.590848      |                |                  | P    | 963.508050        | 482.257663      | 946.481501        | 473.744389       | 7 |
| 4 | 548.220718         | 274.613997      |                |                  | C    | <b>850.460371</b> | 425.733824      | 833.433822        | 417.220549       | 6 |
| 5 | 695.289132         | 348.148204      |                |                  | F    | 676.414072        | 338.710674      | 659.387523        | 330.197400       | 5 |
| 6 | 823.347710         | 412.177493      | 806.321161     | 403.664219       | Q    | <b>529.345658</b> | 265.176467      | <b>512.319109</b> | 256.663193       | 4 |
| 7 | 936.431774         | 468.719525      | 919.405225     | 460.206251       | L    | <b>401.287080</b> | 201.147178      | 384.260531        | 192.633903       | 3 |
| 8 | <b>1049.515838</b> | 525.261557      | 1032.489289    | 516.748283       | L    | <b>288.203016</b> | 144.605146      | 271.176467        | 136.091871       | 2 |
| 9 |                    |                 |                |                  | R    | <b>175.118952</b> | 88.063114       | 158.092403        | 79.549839        | 1 |

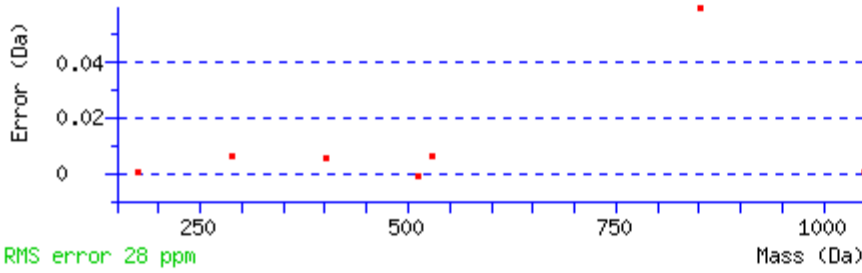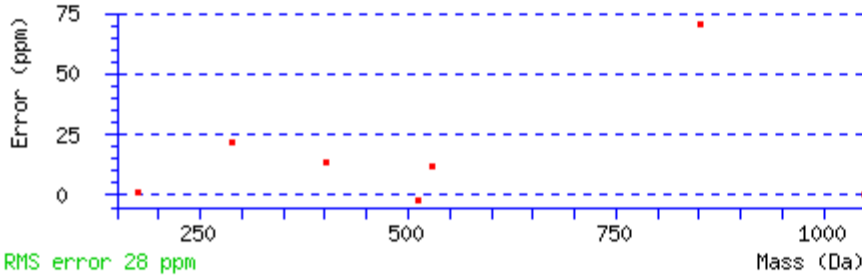

NCBI BLAST search of [MLPCFQLLR](#)

(Parameters: blastp, nr protein database, expect=20000, no filter, PAM30)

Other BLAST [web gateways](#)

All matches to this query

| Score | Mr(calc):   | Delta     | Sequence                    |
|-------|-------------|-----------|-----------------------------|
| 32.2  | 1222.620224 | 0.004384  | <a href="#">MLPCFQLLR</a>   |
| 21.3  | 1222.630569 | -0.005961 | <a href="#">EQHVLAELER</a>  |
| 18.1  | 1222.616653 | 0.007955  | <a href="#">DHERRPIER</a>   |
| 14.2  | 1222.620682 | 0.003926  | <a href="#">AHGYGAHLELR</a> |
| 13.6  | 1222.624069 | 0.000539  | <a href="#">VTLSCHSHLR</a>  |
| 9.9   | 1222.630600 | -0.005992 | <a href="#">GLDDLSTPLR</a>  |
| 9.6   | 1222.634613 | -0.010005 | <a href="#">LGIDNFEFIR</a>  |
| 7.6   | 1222.612823 | 0.011785  | <a href="#">ERLFEQVMR</a>   |
| 5.2   | 1222.616196 | 0.008412  | <a href="#">TMADRILTMR</a>  |
| 4.3   | 1222.630585 | -0.005977 | <a href="#">DEEVLNHVLR</a>  |

# MASCOT SEARCH RESULTS

## Peptide View

MS/MS Fragmentation of **VQASLAANTFTITGHAETK**

Found in **BTF3\_HUMAN**, Transcription factor BTF3 OS=Homo sapiens GN=BTF3 PE=1 SV=1

Match to Query 56193: 1959.002352 from(654.008060,3+) rtinseconds(2394) index(28571)

Title: Locus:1.1.1.2063.43

Data file 2011-11-12 - TFD - EP 6-6.mgf

Click mouse within plot area to zoom in by factor of two about that point

Or, Plot from  to  Da

Label all possible matches  Label matches used for scoring

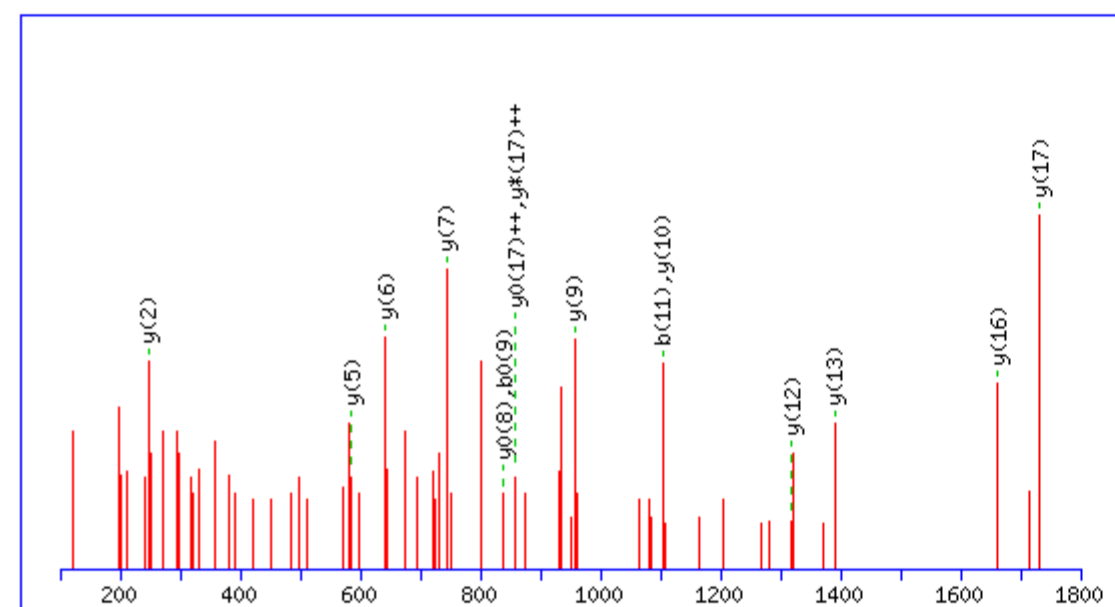

Monoisotopic mass of neutral peptide Mr(calc): 1959.006149

Fixed modifications: Propionamide (C) (apply to specified residues or termini only)

Ions Score: 50 Expect: 5e-005

Matches: 15/206 fragment ions using 29 most intense peaks [\(help\)](#)

| #  | b                  | b <sup>++</sup> | b <sup>+</sup> | b <sup>+++</sup> | b <sup>0</sup>    | b <sup>0++</sup> | Seq. | y                  | y <sup>++</sup> | y <sup>+</sup> | y <sup>+++</sup>  | y <sup>0</sup>    | y <sup>0++</sup>  | #  |
|----|--------------------|-----------------|----------------|------------------|-------------------|------------------|------|--------------------|-----------------|----------------|-------------------|-------------------|-------------------|----|
| 1  | 100.075690         | 50.541483       |                |                  |                   |                  | V    |                    |                 |                |                   |                   |                   | 19 |
| 2  | 228.134268         | 114.570772      | 211.107719     | 106.057498       |                   |                  | Q    | 1860.945020        | 930.976148      | 1843.918471    | 922.462874        | 1842.934455       | 921.970865        | 18 |
| 3  | 299.171382         | 150.089329      | 282.144833     | 141.576055       |                   |                  | A    | <b>1732.886442</b> | 866.946859      | 1715.859893    | <b>858.433585</b> | 1714.875877       | <b>857.941577</b> | 17 |
| 4  | 386.203410         | 193.605343      | 369.176861     | 185.092069       | 368.192845        | 184.600061       | S    | <b>1661.849328</b> | 831.428302      | 1644.822779    | 822.915028        | 1643.838763       | 822.423020        | 16 |
| 5  | 499.287474         | 250.147375      | 482.260925     | 241.634101       | 481.276909        | 241.142093       | L    | 1574.817300        | 787.912288      | 1557.790751    | 779.399014        | 1556.806735       | 778.907005        | 15 |
| 6  | 570.324588         | 285.665932      | 553.298039     | 277.152658       | 552.314023        | 276.660650       | A    | 1461.733236        | 731.370256      | 1444.706687    | 722.856981        | 1443.722671       | 722.364973        | 14 |
| 7  | 641.361702         | 321.184489      | 624.335153     | 312.671215       | 623.351137        | 312.179207       | A    | <b>1390.696122</b> | 695.851699      | 1373.669573    | 687.338425        | 1372.685557       | 686.846417        | 13 |
| 8  | 755.404629         | 378.205953      | 738.378080     | 369.692678       | 737.394064        | 369.200670       | N    | <b>1319.659008</b> | 660.333142      | 1302.632459    | 651.819867        | 1301.648443       | 651.327859        | 12 |
| 9  | 856.452308         | 428.729792      | 839.425759     | 420.216518       | <b>838.441743</b> | 419.724510       | T    | 1205.616081        | 603.311678      | 1188.589532    | 594.798404        | 1187.605516       | 594.306396        | 11 |
| 10 | 1003.520722        | 502.263999      | 986.494173     | 493.750724       | 985.510157        | 493.258716       | F    | <b>1104.568402</b> | 552.787839      | 1087.541853    | 544.274565        | 1086.557837       | 543.782557        | 10 |
| 11 | <b>1104.568401</b> | 552.787839      | 1087.541852    | 544.274564       | 1086.557836       | 543.782556       | T    | <b>957.499988</b>  | 479.253632      | 940.473439     | 470.740358        | 939.489423        | 470.248350        | 9  |
| 12 | 1217.652465        | 609.329870      | 1200.625916    | 600.816596       | 1199.641900       | 600.324588       | I    | 856.452309         | 428.729793      | 839.425760     | 420.216518        | <b>838.441744</b> | 419.724510        | 8  |
| 13 | 1318.700144        | 659.853710      | 1301.673595    | 651.340436       | 1300.689579       | 650.848427       | T    | <b>743.368245</b>  | 372.187761      | 726.341696     | 363.674486        | 725.357680        | 363.182478        | 7  |
| 14 | 1375.721608        | 688.364442      | 1358.695059    | 679.851167       | 1357.711043       | 679.359159       | G    | <b>642.320566</b>  | 321.663921      | 625.294017     | 313.150647        | 624.310001        | 312.658639        | 6  |
| 15 | 1512.780520        | 756.893898      | 1495.753971    | 748.380623       | 1494.769955       | 747.888615       | H    | <b>585.299102</b>  | 293.153189      | 568.272553     | 284.639915        | 567.288537        | 284.147907        | 5  |
| 16 | 1583.817634        | 792.412455      | 1566.791085    | 783.899180       | 1565.807069       | 783.407172       | A    | 448.240190         | 224.623733      | 431.213641     | 216.110459        | 430.229625        | 215.618451        | 4  |
| 17 | 1712.860227        | 856.933751      | 1695.833678    | 848.420477       | 1694.849662       | 847.928469       | E    | 377.203076         | 189.105176      | 360.176527     | 180.591902        | 359.192511        | 180.099894        | 3  |
| 18 | 1813.907906        | 907.457591      | 1796.881357    | 898.944317       | 1795.897341       | 898.452308       | T    | <b>248.160483</b>  | 124.583879      | 231.133934     | 116.070605        | 230.149918        | 115.578597        | 2  |
| 19 |                    |                 |                |                  |                   |                  | K    | 147.112804         | 74.060040       | 130.086255     | 65.546765         |                   |                   | 1  |

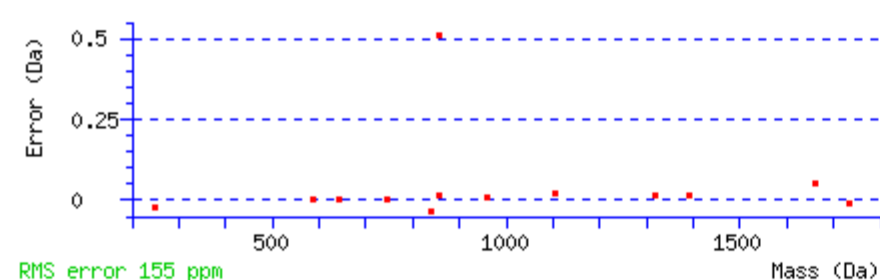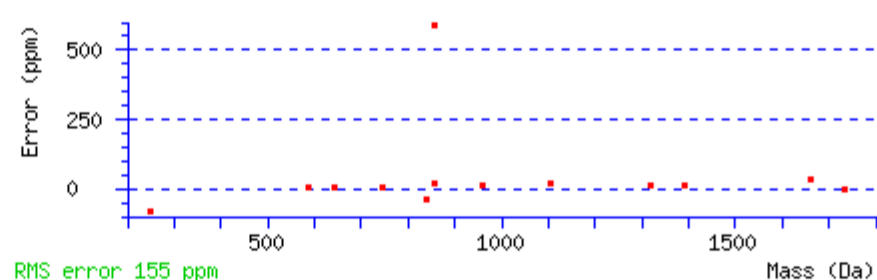

NCBI BLAST search of **VQASLAANTFTITGHAETK**

(Parameters: blastp, nr protein database, expect=20000, no filter, PAM30)

Other BLAST [web gateways](#)

## All matches to this query

| Score | Mr(calc):   | Delta     | Sequence                            |
|-------|-------------|-----------|-------------------------------------|
| 50.1  | 1959.006149 | -0.003797 | <a href="#">VQASLAANTFTITGHAETK</a> |
| 4.2   | 1958.992401 | 0.009951  | <a href="#">LPIAVSCYWLQHTETK</a>    |

Mascot: <http://www.matrixscience.com/>

# **MASCOT** Mascot Search Results

## Peptide View

MS/MS Fragmentation of **IQELEIQAR**

Found in **TFEC\_HUMAN**, Transcription factor EC OS=Homo sapiens GN=TFEC PE=1 SV=1

Match to Query 16353: 1098.611368 from(550.312960,2+) rtinseconds(1959) index(21990)

Title: Locus:1.1.1.2234.24

Data file 2011-11-10 - TFD - EP 4-3.mgf

Click mouse within plot area to zoom in by factor of two about that point

Or, Plot from  to  Da

Label all possible matches  Label matches used for scoring

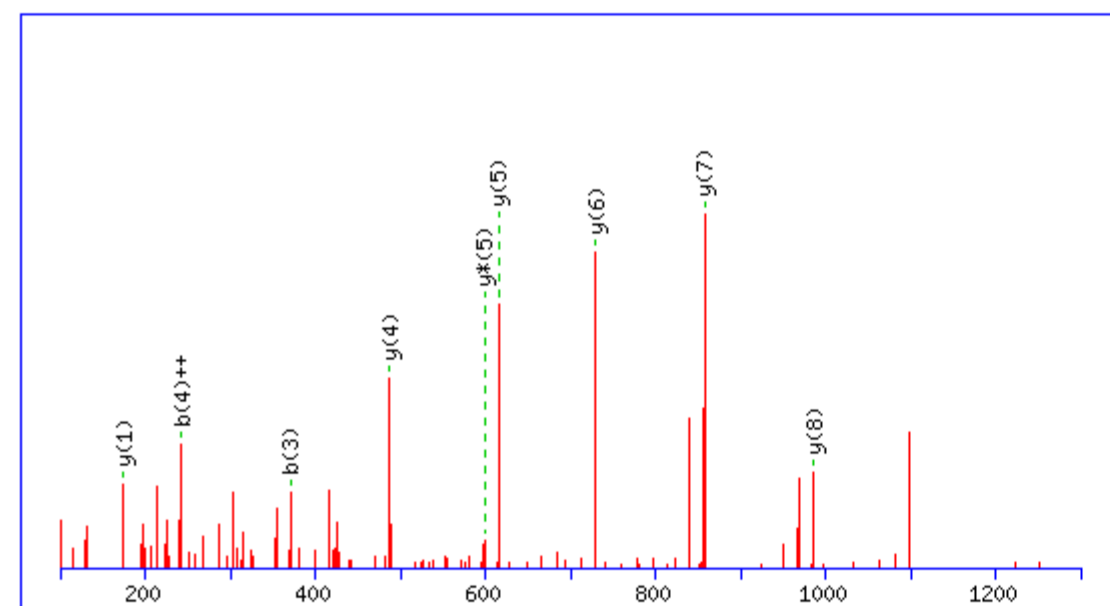

Monoisotopic mass of neutral peptide Mr(calc): 1098.603287

Fixed modifications: Propionamide (C) (apply to specified residues or termini only)

Ions Score: 53 Expect: 6.2e-005

Matches : 9/82 fragment ions using 10 most intense peaks ([help](#))

| # | b                 | b <sup>++</sup>   | b <sup>*</sup> | b <sup>*++</sup> | b <sup>0</sup> | b <sup>0++</sup> | Seq. | y                 | y <sup>++</sup> | y <sup>*</sup>    | y <sup>*++</sup> | y <sup>0</sup> | y <sup>0++</sup> | # |
|---|-------------------|-------------------|----------------|------------------|----------------|------------------|------|-------------------|-----------------|-------------------|------------------|----------------|------------------|---|
| 1 | 114.091340        | 57.549308         |                |                  |                |                  | I    |                   |                 |                   |                  |                |                  | 9 |
| 2 | 242.149918        | 121.578597        | 225.123369     | 113.065323       |                |                  | Q    | <b>986.526536</b> | 493.766906      | 969.499987        | 485.253632       | 968.515971     | 484.761624       | 8 |
| 3 | <b>371.192511</b> | 186.099894        | 354.165962     | 177.586619       | 353.181946     | 177.094611       | E    | <b>858.467958</b> | 429.737617      | 841.441409        | 421.224343       | 840.457393     | 420.732335       | 7 |
| 4 | 484.276575        | <b>242.641926</b> | 467.250026     | 234.128651       | 466.266010     | 233.636643       | L    | <b>729.425365</b> | 365.216321      | 712.398816        | 356.703046       | 711.414800     | 356.211038       | 6 |
| 5 | 613.319168        | 307.163222        | 596.292619     | 298.649948       | 595.308603     | 298.157940       | E    | <b>616.341301</b> | 308.674289      | <b>599.314752</b> | 300.161014       | 598.330736     | 299.669006       | 5 |
| 6 | 726.403232        | 363.705254        | 709.376683     | 355.191980       | 708.392667     | 354.699972       | I    | <b>487.298708</b> | 244.152992      | 470.272159        | 235.639718       |                |                  | 4 |
| 7 | 854.461810        | 427.734543        | 837.435261     | 419.221269       | 836.451245     | 418.729261       | Q    | 374.214644        | 187.610960      | 357.188095        | 179.097686       |                |                  | 3 |
| 8 | 925.498924        | 463.253100        | 908.472375     | 454.739826       | 907.488359     | 454.247818       | A    | 246.156066        | 123.581671      | 229.129517        | 115.068397       |                |                  | 2 |
| 9 |                   |                   |                |                  |                |                  | R    | <b>175.118952</b> | 88.063114       | 158.092403        | 79.549840        |                |                  | 1 |

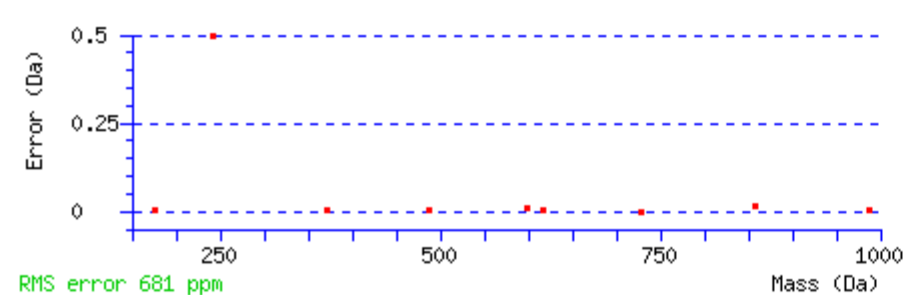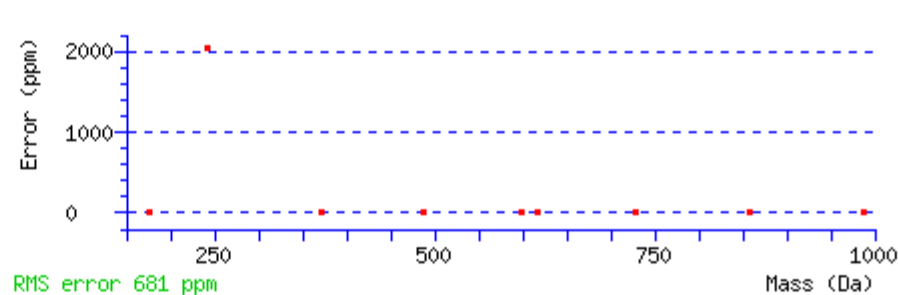

NCBI BLAST search of [IQELEIQAR](#)

(Parameters: blastp, nr protein database, expect=20000, no filter, PAM30)

Other BLAST [web gateways](#)

## All matches to this query

| Score | Mr(calc):   | Delta     | Sequence                   |
|-------|-------------|-----------|----------------------------|
| 52.8  | 1098.603287 | 0.008081  | <a href="#">IQELEIQAR</a>  |
| 19.2  | 1098.614532 | -0.003164 | <a href="#">LRTELPAGAR</a> |
| 13.4  | 1098.614532 | -0.003164 | <a href="#">VRDLLAEQR</a>  |
| 13.1  | 1098.614548 | -0.003180 | <a href="#">GPLSPARTLR</a> |
| 12.1  | 1098.614517 | -0.003149 | <a href="#">LQNAKEQLR</a>  |
| 11.9  | 1098.614532 | -0.003164 | <a href="#">LLEQARDVR</a>  |
| 11.3  | 1098.603302 | 0.008066  | <a href="#">VLSAPPKESR</a> |
| 10.5  | 1098.603317 | 0.008051  | <a href="#">VPAPSSILQR</a> |
| 9.2   | 1098.614517 | -0.003149 | <a href="#">IQQAKNEIR</a>  |
| 8.2   | 1098.607330 | 0.004038  | <a href="#">EIQPPFKPK</a>  |

Mascot: <http://www.matrixscience.com/>

# **MASCOT** Mascot Search Results

## Peptide View

MS/MS Fragmentation of **RAGDAAELR**

Found in **HES2\_HUMAN**, Transcription factor HES-2 OS=Homo sapiens GN=HES2 PE=2 SV=1

Match to Query 204428: 957.491328 from(479.752940,2+) rtinseconds(2181) index(266020)

Title: Locus:1.1.1.1280.9

Data file C:\Program Files (x86)\Matrix Science\Mascot Daemon\mgf3 TFD - Epitel - R2\mascot\_daemon\_merge.mgf

Click mouse within plot area to zoom in by factor of two about that point

Or, Plot from  to  Da

Label all possible matches  Label matches used for scoring

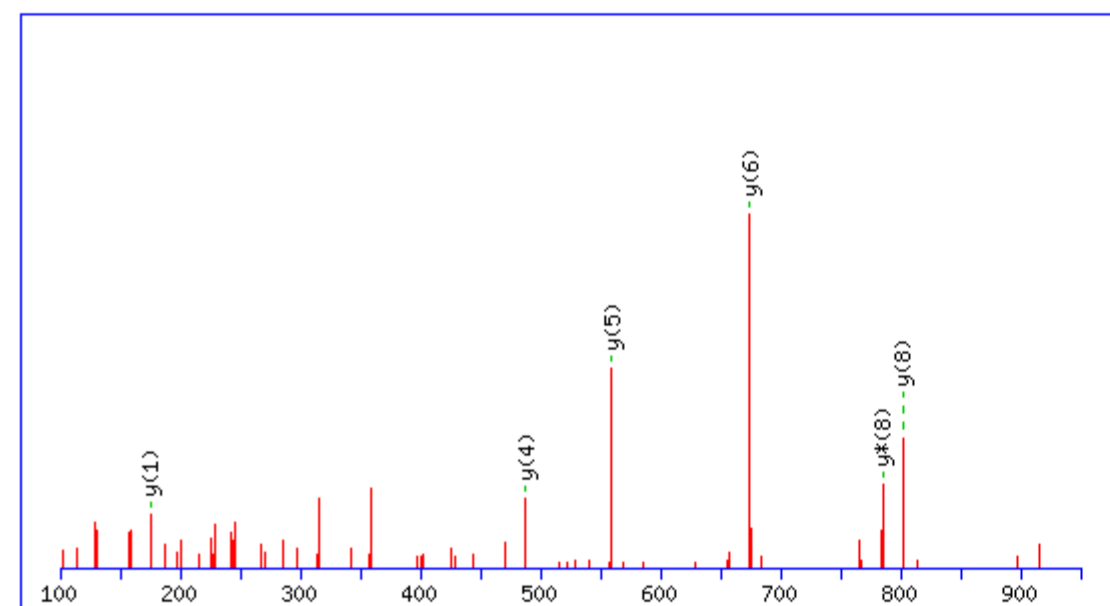

Monoisotopic mass of neutral peptide Mr(calc): 957.499161

Fixed modifications: Carbamidomethyl (C) (apply to specified residues or termini only)

Ions Score: 38 Expect: 0.0025

Matches : 6/86 fragment ions using 9 most intense peaks ([help](#))

| # | b          | b <sup>++</sup> | b <sup>*</sup> | b <sup>*++</sup> | b <sup>0</sup> | b <sup>0++</sup> | Seq. | y          | y <sup>++</sup> | y <sup>*</sup> | y <sup>*++</sup> | y <sup>0</sup> | y <sup>0++</sup> | # |
|---|------------|-----------------|----------------|------------------|----------------|------------------|------|------------|-----------------|----------------|------------------|----------------|------------------|---|
| 1 | 157.108387 | 79.057831       | 140.081838     | 70.544557        |                |                  | R    |            |                 |                |                  |                |                  | 9 |
| 2 | 228.145501 | 114.576388      | 211.118952     | 106.063114       |                |                  | A    | 802.405358 | 401.706317      | 785.378809     | 393.193043       | 784.394793     | 392.701035       | 8 |
| 3 | 285.166965 | 143.087121      | 268.140416     | 134.573846       |                |                  | G    | 731.368244 | 366.187760      | 714.341695     | 357.674486       | 713.357679     | 357.182478       | 7 |
| 4 | 400.193908 | 200.600592      | 383.167359     | 192.087318       | 382.183343     | 191.595310       | D    | 674.346780 | 337.677028      | 657.320231     | 329.163754       | 656.336215     | 328.671746       | 6 |
| 5 | 471.231022 | 236.119149      | 454.204473     | 227.605875       | 453.220457     | 227.113867       | A    | 559.319837 | 280.163557      | 542.293288     | 271.650282       | 541.309272     | 271.158274       | 5 |
| 6 | 542.268136 | 271.637706      | 525.241587     | 263.124432       | 524.257571     | 262.632424       | A    | 488.282723 | 244.645000      | 471.256174     | 236.131725       | 470.272158     | 235.639717       | 4 |
| 7 | 671.310729 | 336.159003      | 654.284180     | 327.645728       | 653.300164     | 327.153720       | E    | 417.245609 | 209.126443      | 400.219060     | 200.613168       | 399.235044     | 200.121160       | 3 |
| 8 | 784.394793 | 392.701035      | 767.368244     | 384.187760       | 766.384228     | 383.695752       | L    | 288.203016 | 144.605146      | 271.176467     | 136.091872       |                |                  | 2 |
| 9 |            |                 |                |                  |                |                  | R    | 175.118952 | 88.063114       | 158.092403     | 79.549840        |                |                  | 1 |

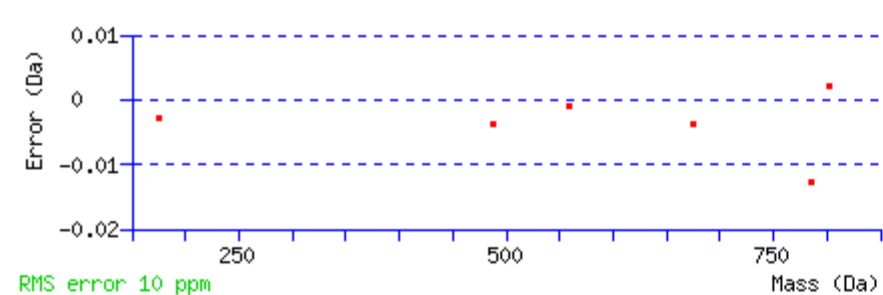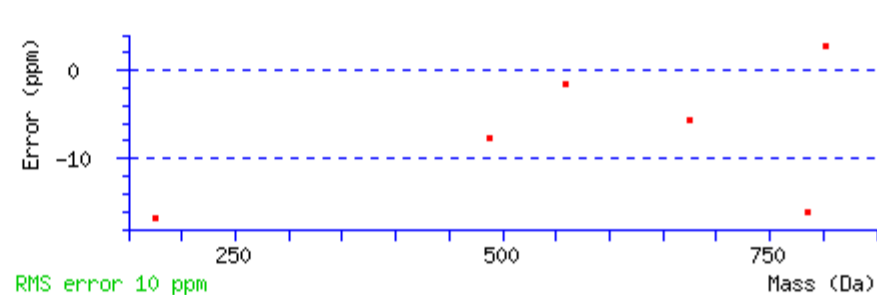

NCBI BLAST search of [RAGDAAELR](#)

(Parameters: blastp, nr protein database, expect=20000, no filter, PAM30)

Other BLAST [web gateways](#)

## All matches to this query

| Score | Mr(calc):  | Delta     | Sequence                  |
|-------|------------|-----------|---------------------------|
| 38.5  | 957.499161 | -0.007833 | <a href="#">RAGDAAELR</a> |
| 23.8  | 957.499176 | -0.007848 | <a href="#">RQEVSSPR</a>  |
| 20.7  | 957.487946 | 0.003382  | <a href="#">QGVDIEAAR</a> |
| 18.3  | 957.487946 | 0.003382  | <a href="#">NSTPPSLAR</a> |
| 12.8  | 957.499161 | -0.007833 | <a href="#">GEEQLRAR</a>  |
| 12.2  | 957.499161 | -0.007833 | <a href="#">RQEELQR</a>   |
| 12.2  | 957.499176 | -0.007848 | <a href="#">RQSDPSIR</a>  |
| 11.0  | 957.489288 | 0.002040  | <a href="#">RGWRPDR</a>   |
| 10.4  | 957.499176 | -0.007848 | <a href="#">SDGAAIPRR</a> |
| 10.1  | 957.499176 | -0.007848 | <a href="#">TPASRPSAR</a> |

**MATRIX SCIENCE Mascot Search Results**

**Peptide View**

MS/MS Fragmentation of **AINAALAQR**

Found in **T2AG\_HUMAN**, Transcription initiation factor IIA subunit 2 OS=Homo sapiens GN=GTF2A2 PE=1 SV=1

Match to Query 10047: 926.533408 from(464.273980,2+) rtinseconds(1464) index(7277)

Title: Locus:1.1.1.1964.20

Data file 2011-11-10 - TFD - EP 3-7.mgf

Click mouse within plot area to zoom in by factor of two about that point

Or, Plot from  to  Da

Label all possible matches  Label matches used for scoring

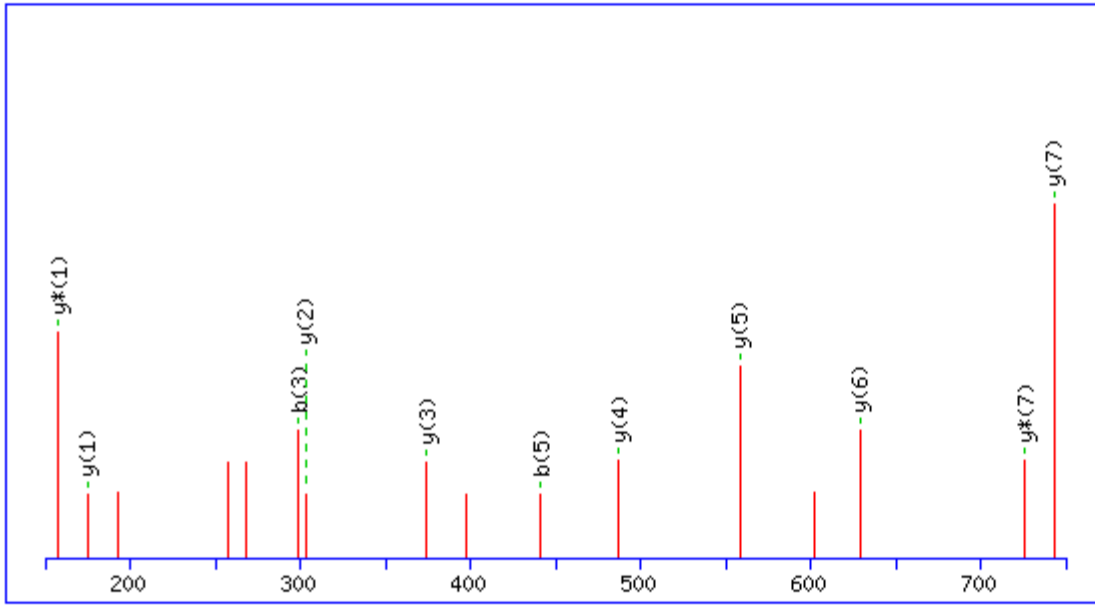

Monoisotopic mass of neutral peptide Mr(calc): 926.529724

Fixed modifications: Propionamide (C) (apply to specified residues or termini only)

Ions Score: 59 Expect: 6.8e-006

Matches : 11/60 fragment ions using 17 most intense peaks ([help](#))

| # | b                 | b <sup>++</sup> | b <sup>*</sup> | b <sup>*++</sup> | Seq. | y                 | y <sup>++</sup> | y <sup>*</sup>    | y <sup>*++</sup> | # |
|---|-------------------|-----------------|----------------|------------------|------|-------------------|-----------------|-------------------|------------------|---|
| 1 | 72.044390         | 36.525833       |                |                  | A    |                   |                 |                   |                  | 9 |
| 2 | 185.128454        | 93.067865       |                |                  | I    | 856.499927        | 428.753602      | 839.473378        | 420.240327       | 8 |
| 3 | <b>299.171381</b> | 150.089328      | 282.144832     | 141.576054       | N    | <b>743.415863</b> | 372.211570      | <b>726.389314</b> | 363.698295       | 7 |
| 4 | 370.208495        | 185.607886      | 353.181946     | 177.094611       | A    | <b>629.372936</b> | 315.190106      | 612.346387        | 306.676831       | 6 |
| 5 | <b>441.245609</b> | 221.126443      | 424.219060     | 212.613168       | A    | <b>558.335822</b> | 279.671549      | 541.309273        | 271.158275       | 5 |
| 6 | 554.329673        | 277.668475      | 537.303124     | 269.155200       | L    | <b>487.298708</b> | 244.152992      | 470.272159        | 235.639717       | 4 |
| 7 | 625.366787        | 313.187032      | 608.340238     | 304.673757       | A    | <b>374.214644</b> | 187.610960      | 357.188095        | 179.097685       | 3 |
| 8 | 753.425365        | 377.216321      | 736.398816     | 368.703046       | Q    | <b>303.177530</b> | 152.092403      | 286.150981        | 143.579128       | 2 |
| 9 |                   |                 |                |                  | R    | <b>175.118952</b> | 88.063114       | <b>158.092403</b> | 79.549839        | 1 |

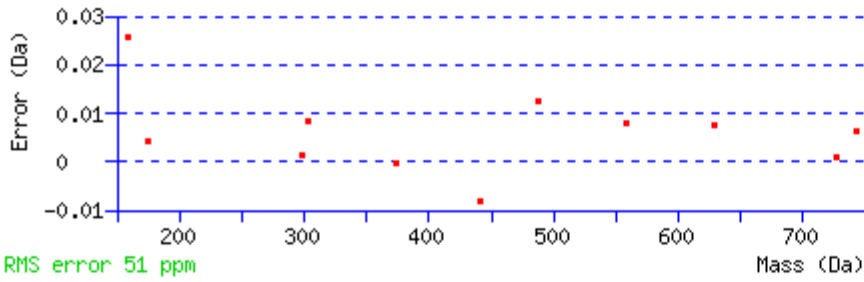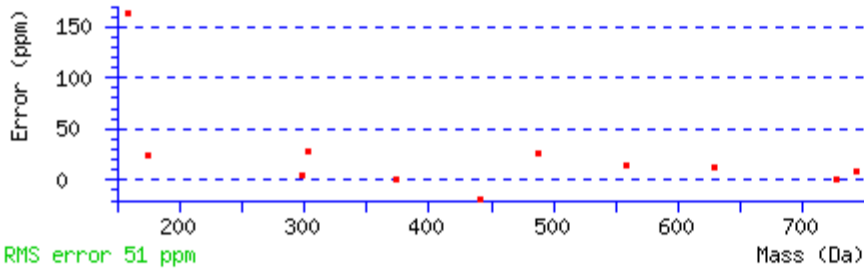

NCBI BLAST search of **AINAALAQR**

(Parameters: blastp, nr protein database, expect=20000, no filter, PAM30)

Other BLAST [web gateways](#)

**All matches to this query**

| Score | Mr(calc):  | Delta    | Sequence                  |
|-------|------------|----------|---------------------------|
| 59.2  | 926.529724 | 0.003684 | <a href="#">AINAALAQR</a> |
| 13.6  | 926.529755 | 0.003653 | <a href="#">NQVVIAAGR</a> |
| 6.6   | 926.529739 | 0.003669 | <a href="#">NALNVLQR</a>  |
| 4.5   | 926.529739 | 0.003669 | <a href="#">LQQAQALR</a>  |
| 3.0   | 926.529755 | 0.003653 | <a href="#">IGVNQPKR</a>  |
| 1.3   | 926.529739 | 0.003669 | <a href="#">SPGLLERR</a>  |
| 0.5   | 926.529739 | 0.003669 | <a href="#">LADPRLSR</a>  |

# MASCOT SCIENCE Mascot Search Results

## Peptide View

### MS/MS Fragmentation of **GFAFVYFER**

Found in **TRA2A\_HUMAN**, Transformer-2 protein homolog alpha OS=Homo sapiens GN=TRA2A PE=1 SV=1

Match to Query 24668: 1134.551188 from(568.282870,2+) rtinseconds(3437) index(50134)

Title: Locus:1.1.1.2632.5

Data file 2011-11-10 - TFD - EP 4-4.mgf

Click mouse within plot area to zoom in by factor of two about that point

Or, Plot from  to  Da

Label all possible matches  Label matches used for scoring

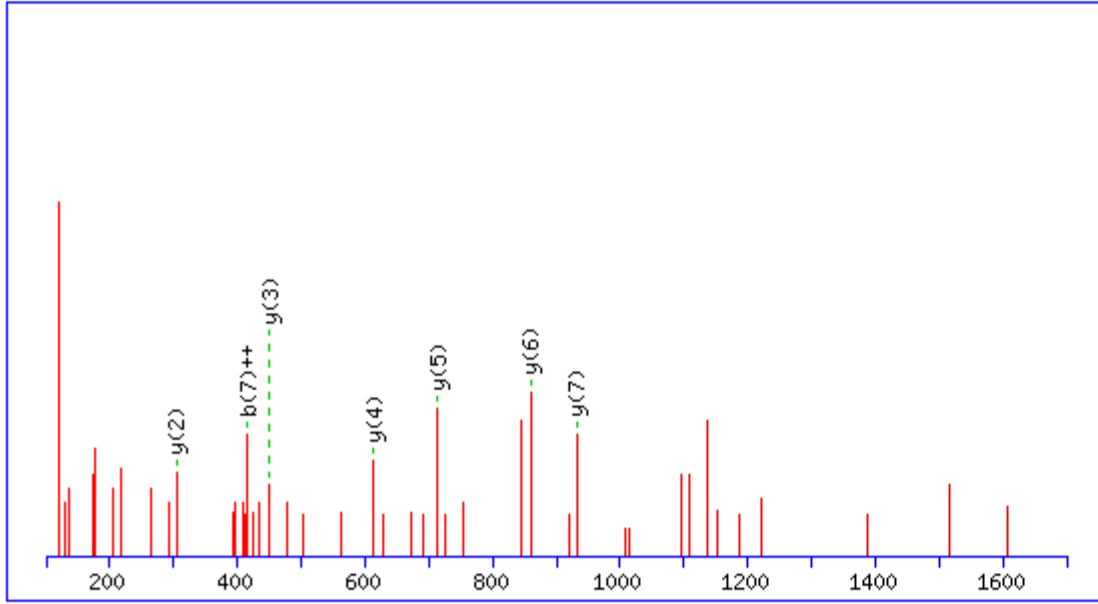

Monoisotopic mass of neutral peptide Mr(calc): 1134.549835

Fixed modifications: Propionamide (C) (apply to specified residues or termini only)

Ions Score: 42 Expect: 0.00065

Matches : 7/64 fragment ions using 10 most intense peaks [\(help\)](#)

| # | b          | b <sup>++</sup>   | b <sup>0</sup> | b <sup>0++</sup> | Seq.     | y                 | y <sup>++</sup> | y <sup>*</sup> | y <sup>*++</sup> | y <sup>0</sup> | y <sup>0++</sup> | # |
|---|------------|-------------------|----------------|------------------|----------|-------------------|-----------------|----------------|------------------|----------------|------------------|---|
| 1 | 58.028740  | 29.518008         |                |                  | <b>G</b> |                   |                 |                |                  |                |                  | 9 |
| 2 | 205.097154 | 103.052215        |                |                  | <b>F</b> | 1078.535644       | 539.771460      | 1061.509095    | 531.258186       | 1060.525079    | 530.766178       | 8 |
| 3 | 276.134268 | 138.570772        |                |                  | <b>A</b> | <b>931.467230</b> | 466.237253      | 914.440681     | 457.723978       | 913.456665     | 457.231970       | 7 |
| 4 | 423.202682 | 212.104979        |                |                  | <b>F</b> | <b>860.430116</b> | 430.718696      | 843.403567     | 422.205422       | 842.419551     | 421.713414       | 6 |
| 5 | 522.271096 | 261.639186        |                |                  | <b>V</b> | <b>713.361702</b> | 357.184489      | 696.335153     | 348.671215       | 695.351137     | 348.179207       | 5 |
| 6 | 685.334425 | 343.170851        |                |                  | <b>Y</b> | <b>614.293288</b> | 307.650282      | 597.266739     | 299.137008       | 596.282723     | 298.645000       | 4 |
| 7 | 832.402839 | <b>416.705058</b> |                |                  | <b>F</b> | <b>451.229959</b> | 226.118617      | 434.203410     | 217.605343       | 433.219394     | 217.113335       | 3 |
| 8 | 961.445432 | 481.226354        | 943.434867     | 472.221071       | <b>E</b> | <b>304.161545</b> | 152.584410      | 287.134996     | 144.071136       | 286.150980     | 143.579128       | 2 |
| 9 |            |                   |                |                  | <b>R</b> | 175.118952        | 88.063114       | 158.092403     | 79.549839        |                |                  | 1 |

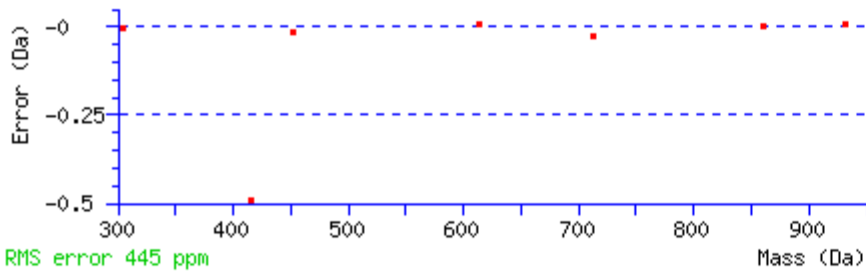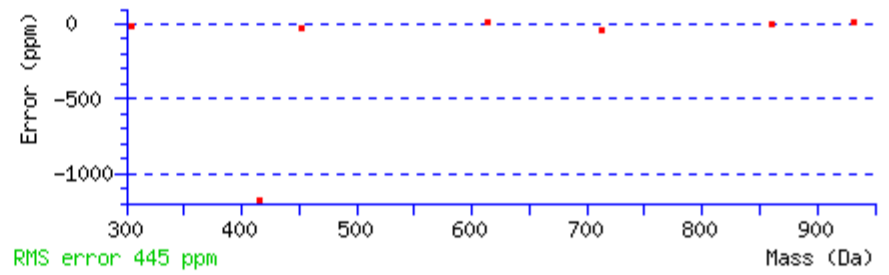

### NCBI BLAST search of **GFAFVYFER**

(Parameters: blastp, nr protein database, expect=20000, no filter, PAM30)

Other BLAST [web gateways](#)

### All matches to this query

| Score | Mr(calc):   | Delta     | Sequence                    |
|-------|-------------|-----------|-----------------------------|
| 41.8  | 1134.549835 | 0.001353  | <a href="#">GFAFVYFER</a>   |
| 7.8   | 1134.545822 | 0.005366  | <a href="#">THYPDVFTR</a>   |
| 6.1   | 1134.559082 | -0.007894 | <a href="#">MGADGETVVLK</a> |

Mascot: <http://www.matrixscience.com/>

# MASCOT SCIENCE Mascot Search Results

## Peptide View

MS/MS Fragmentation of **FISLASLEYS**DYSK

Found in **EI2BA\_HUMAN**, Translation initiation factor eIF-2B subunit alpha OS=Homo sapiens GN=EIF2B1 PE=1 SV=1

Match to Query 47321: 1621.791588 from(811.903070,2+) rtinseconds(3377) index(44337)

Title: Locus:1.1.1.2870.49

Data file 2011-11-12 - TFD - EP 5-5.mgf

Click mouse within plot area to zoom in by factor of two about that point

Or, Plot from  to  Da

Label all possible matches  Label matches used for scoring

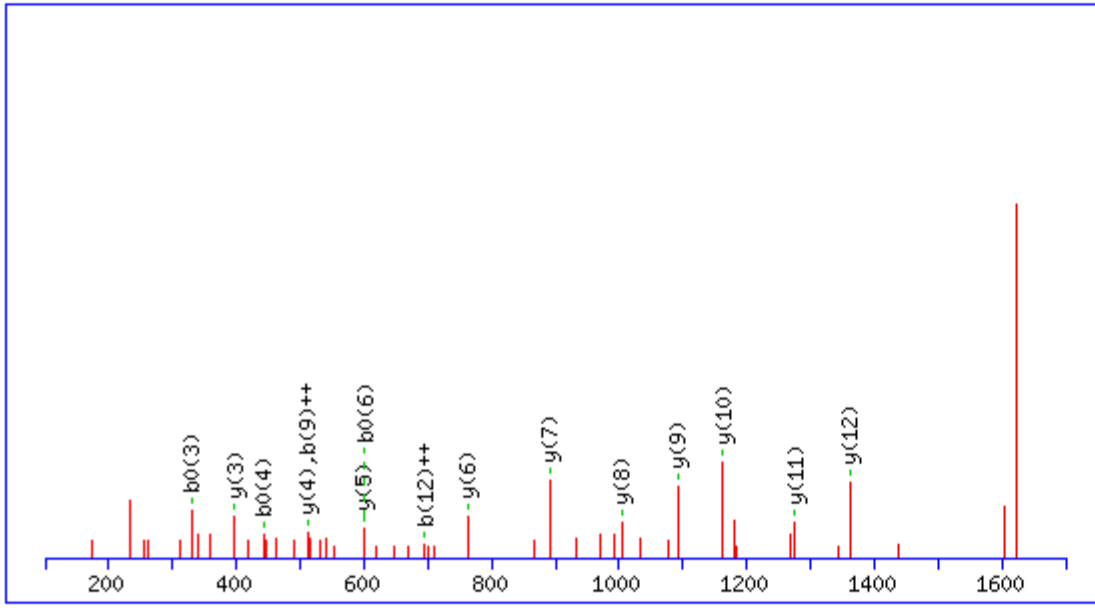

Monoisotopic mass of neutral peptide Mr(calc): 1621.787521

Fixed modifications: Propionamide (C) (apply to specified residues or termini only)

Ions Score: 65 Expect: 1.1e-006

Matches : 15/124 fragment ions using 25 most intense peaks [\(help\)](#)

| #  | b           | b <sup>++</sup> | b <sup>0</sup> | b <sup>0++</sup> | Seq. | y           | y <sup>++</sup> | y <sup>*</sup> | y <sup>*++</sup> | y <sup>0</sup> | y <sup>0++</sup> | #  |
|----|-------------|-----------------|----------------|------------------|------|-------------|-----------------|----------------|------------------|----------------|------------------|----|
| 1  | 148.075690  | 74.541483       |                |                  | F    |             |                 |                |                  |                |                  | 14 |
| 2  | 261.159754  | 131.083515      |                |                  | I    | 1475.726416 | 738.366846      | 1458.699867    | 729.853572       | 1457.715851    | 729.361564       | 13 |
| 3  | 348.191782  | 174.599529      | 330.181217     | 165.594246       | S    | 1362.642352 | 681.824814      | 1345.615803    | 673.311540       | 1344.631787    | 672.819532       | 12 |
| 4  | 461.275846  | 231.141561      | 443.265281     | 222.136278       | L    | 1275.610324 | 638.308800      | 1258.583775    | 629.795526       | 1257.599759    | 629.303518       | 11 |
| 5  | 532.312960  | 266.660118      | 514.302395     | 257.654835       | A    | 1162.526260 | 581.766768      | 1145.499711    | 573.253494       | 1144.515695    | 572.761486       | 10 |
| 6  | 619.344988  | 310.176132      | 601.334423     | 301.170849       | S    | 1091.489146 | 546.248211      | 1074.462597    | 537.734937       | 1073.478581    | 537.242929       | 9  |
| 7  | 732.429052  | 366.718164      | 714.418487     | 357.712881       | L    | 1004.457118 | 502.732197      | 987.430569     | 494.218923       | 986.446553     | 493.726915       | 8  |
| 8  | 861.471645  | 431.239461      | 843.461080     | 422.234178       | E    | 891.373054  | 446.190165      | 874.346505     | 437.676891       | 873.362489     | 437.184883       | 7  |
| 9  | 1024.534974 | 512.771125      | 1006.524409    | 503.765842       | Y    | 762.330461  | 381.668869      | 745.303912     | 373.155594       | 744.319896     | 372.663586       | 6  |
| 10 | 1111.567002 | 556.287139      | 1093.556437    | 547.281857       | S    | 599.267132  | 300.137204      | 582.240583     | 291.623930       | 581.256567     | 291.131922       | 5  |
| 11 | 1226.593945 | 613.800611      | 1208.583380    | 604.795328       | D    | 512.235104  | 256.621190      | 495.208555     | 248.107916       | 494.224539     | 247.615908       | 4  |
| 12 | 1389.657274 | 695.332275      | 1371.646709    | 686.326993       | Y    | 397.208161  | 199.107719      | 380.181612     | 190.594444       | 379.197596     | 190.102436       | 3  |
| 13 | 1476.689302 | 738.848289      | 1458.678737    | 729.843007       | S    | 234.144832  | 117.576054      | 217.118283     | 109.062780       | 216.134267     | 108.570772       | 2  |
| 14 |             |                 |                |                  | K    | 147.112804  | 74.060040       | 130.086255     | 65.546765        |                |                  | 1  |

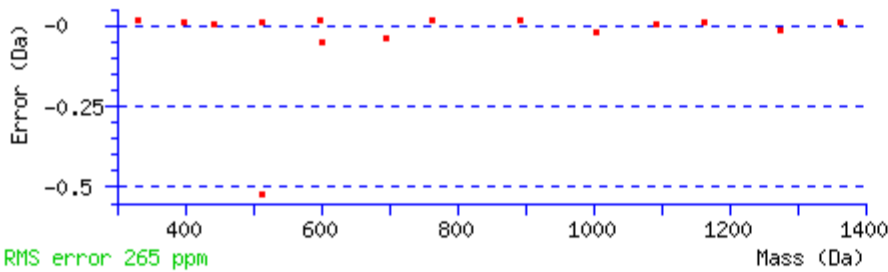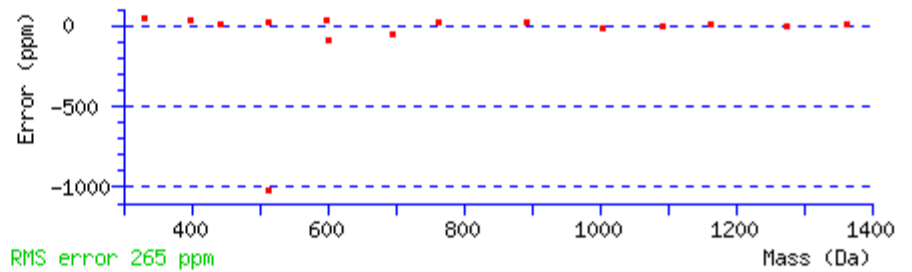

NCBI BLAST search of **FISLASLEYS**DYSK

(Parameters: blastp, nr protein database, expect=20000, no filter, PAM30)

Other BLAST [web gateways](#)

## All matches to this query

| Score | Mr(calc):   | Delta    | Sequence                         |
|-------|-------------|----------|----------------------------------|
| 65.3  | 1621.787521 | 0.004067 | <a href="#">FISLASLEYS</a> DYSK  |
| 1.6   | 1621.777008 | 0.014580 | <a href="#">MFAVGVGNA</a> VEDELK |

Mascot: <http://www.matrixscience.com/>

# MASCOT SCIENCE Mascot Search Results

## Peptide View

MS/MS Fragmentation of **ASPSTAGETPSGVK**

Found in **EI2BD\_HUMAN**, Translation initiation factor eIF-2B subunit delta OS=Homo sapiens GN=EIF2B4 PE=1 SV=2

Match to Query 626464: 1287.634708 from(644.824630,2+) rtinseconds(1081) index(159399)

Title: Locus:1.1.1.1096.25

Data file C:\Program Files (x86)\Matrix Science\Mascot Daemon\mgf3 TFD - Epitel - R2\mascot\_daemon\_merge.mgf

Click mouse within plot area to zoom in by factor of two about that point

Or, Plot from  to  Da

Label all possible matches  Label matches used for scoring

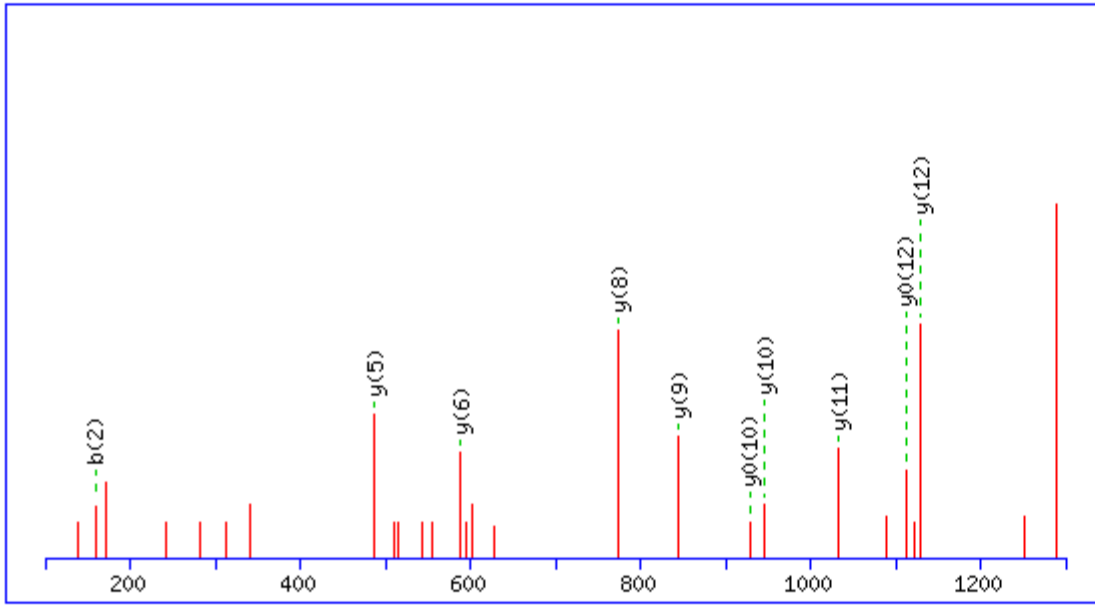

Monoisotopic mass of neutral peptide Mr(calc): 1287.630661

Fixed modifications: Carbamidomethyl (C) (apply to specified residues or termini only)

Ions Score: 45 Expect: 7e-005

Matches : 10/122 fragment ions using 17 most intense peaks [\(help\)](#)

| #  | b                 | b <sup>++</sup> | b <sup>0</sup> | b <sup>0++</sup> | Seq. | y                  | y <sup>++</sup> | y <sup>*</sup> | y <sup>*++</sup> | y <sup>0</sup>     | y <sup>0++</sup> | #  |
|----|-------------------|-----------------|----------------|------------------|------|--------------------|-----------------|----------------|------------------|--------------------|------------------|----|
| 1  | 72.044390         | 36.525833       |                |                  | A    |                    |                 |                |                  |                    |                  | 14 |
| 2  | <b>159.076418</b> | 80.041847       | 141.065853     | 71.036564        | S    | 1217.600823        | 609.304050      | 1200.574274    | 600.790775       | 1199.590258        | 600.298767       | 13 |
| 3  | 256.129182        | 128.568229      | 238.118617     | 119.562947       | P    | <b>1130.568795</b> | 565.788036      | 1113.542246    | 557.274761       | <b>1112.558230</b> | 556.782753       | 12 |
| 4  | 343.161210        | 172.084243      | 325.150645     | 163.078960       | S    | <b>1033.516031</b> | 517.261654      | 1016.489482    | 508.748379       | 1015.505466        | 508.256371       | 11 |
| 5  | 444.208889        | 222.608082      | 426.198324     | 213.602800       | T    | <b>946.484003</b>  | 473.745640      | 929.457454     | 465.232365       | <b>928.473438</b>  | 464.740357       | 10 |
| 6  | 515.246003        | 258.126640      | 497.235438     | 249.121357       | A    | <b>845.436324</b>  | 423.221800      | 828.409775     | 414.708526       | 827.425759         | 414.216518       | 9  |
| 7  | 572.267467        | 286.637372      | 554.256902     | 277.632089       | G    | <b>774.399210</b>  | 387.703243      | 757.372661     | 379.189969       | 756.388645         | 378.697961       | 8  |
| 8  | 701.310060        | 351.158668      | 683.299495     | 342.153386       | E    | 717.377746         | 359.192511      | 700.351197     | 350.679237       | 699.367181         | 350.187229       | 7  |
| 9  | 802.357739        | 401.682508      | 784.347174     | 392.677225       | T    | <b>588.335153</b>  | 294.671215      | 571.308604     | 286.157940       | 570.324588         | 285.665932       | 6  |
| 10 | 899.410503        | 450.208890      | 881.399938     | 441.203607       | P    | <b>487.287474</b>  | 244.147375      | 470.260925     | 235.634100       | 469.276909         | 235.142092       | 5  |
| 11 | 986.442531        | 493.724904      | 968.431966     | 484.719621       | S    | 390.234710         | 195.620993      | 373.208161     | 187.107718       | 372.224145         | 186.615710       | 4  |
| 12 | 1043.463995       | 522.235636      | 1025.453430    | 513.230353       | G    | 303.202682         | 152.104979      | 286.176133     | 143.591704       |                    |                  | 3  |
| 13 | 1142.532409       | 571.769843      | 1124.521844    | 562.764560       | V    | 246.181218         | 123.594247      | 229.154669     | 115.080973       |                    |                  | 2  |
| 14 |                   |                 |                |                  | K    | 147.112804         | 74.060040       | 130.086255     | 65.546765        |                    |                  | 1  |

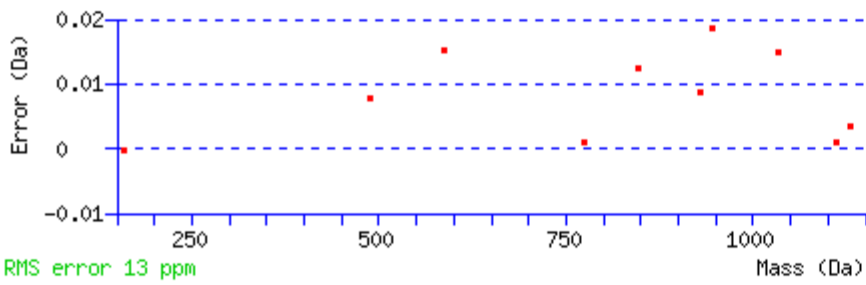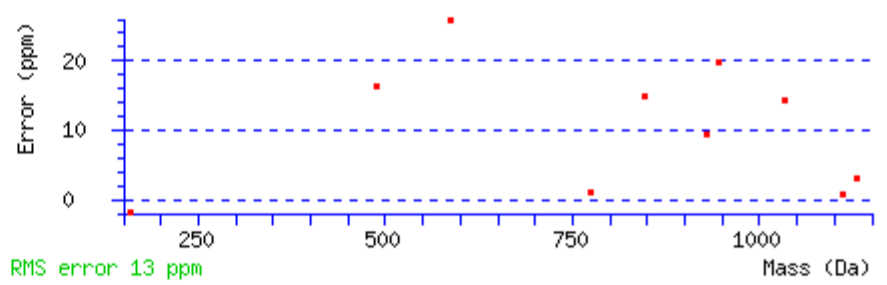

NCBI BLAST search of [ASPSTAGETPSGVK](#)

(Parameters: blastp, nr protein database, expect=20000, no filter, PAM30)

Other BLAST [web gateways](#)

## All matches to this query

| Score | Mr(calc):   | Delta    | Sequence                       |
|-------|-------------|----------|--------------------------------|
| 44.7  | 1287.630661 | 0.004047 | <a href="#">ASPSTAGETPSGVK</a> |
| 0.4   | 1287.628143 | 0.006565 | <a href="#">HPLAMYPNLGK</a>    |

Mascot: <http://www.matrixscience.com/>



# MASCOT Search Results

## Peptide View

MS/MS Fragmentation of **IQEVGEPKSEEEK**

Found in **SEC62\_HUMAN**, Translocation protein SEC62 OS=Homo sapiens GN=SEC62 PE=1 SV=1

Match to Query 719267: 1371.691208 from(686.852880,2+) rtinseconds(942) index(327727)

Title: Locus:1.1.1.690.47

Data file C:\Program Files (x86)\Matrix Science\Mascot Daemon\mgf3 TFD - Epitel - R2\mascot\_daemon\_merge.mgf

Click mouse within plot area to zoom in by factor of two about that point

Or, Plot from  to  Da

Label all possible matches  Label matches used for scoring

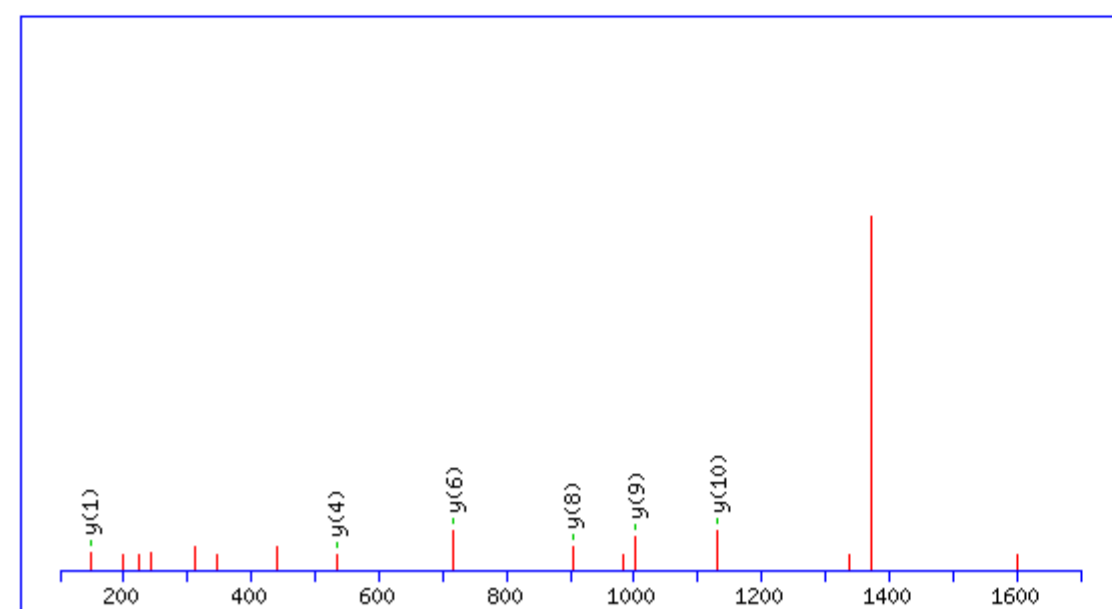

Monoisotopic mass of neutral peptide  $M_r(\text{calc})$ : 1371.688141

Fixed modifications: Carbamidomethyl (C) (apply to specified residues or termini only)

Ions Score: 45 Expect: 0.00038

Matches : 6/124 fragment ions using 9 most intense peaks [\(help\)](#)

| #  | b           | b <sup>++</sup> | b <sup>*</sup> | b <sup>*++</sup> | b <sup>0</sup> | b <sup>0++</sup> | Seq. | y                  | y <sup>++</sup> | y <sup>*</sup> | y <sup>*++</sup> | y <sup>0</sup> | y <sup>0++</sup> | #  |
|----|-------------|-----------------|----------------|------------------|----------------|------------------|------|--------------------|-----------------|----------------|------------------|----------------|------------------|----|
| 1  | 114.091340  | 57.549308       |                |                  |                |                  | I    |                    |                 |                |                  |                |                  | 12 |
| 2  | 242.149918  | 121.578597      | 225.123369     | 113.065323       |                |                  | Q    | 1259.611387        | 630.309332      | 1242.584838    | 621.796057       | 1241.600822    | 621.304049       | 11 |
| 3  | 371.192511  | 186.099894      | 354.165962     | 177.586619       | 353.181946     | 177.094611       | E    | <b>1131.552809</b> | 566.280043      | 1114.526260    | 557.766768       | 1113.542244    | 557.274760       | 10 |
| 4  | 470.260925  | 235.634101      | 453.234376     | 227.120826       | 452.250360     | 226.628818       | V    | <b>1002.510216</b> | 501.758746      | 985.483667     | 493.245472       | 984.499651     | 492.753464       | 9  |
| 5  | 527.282389  | 264.144833      | 510.255840     | 255.631558       | 509.271824     | 255.139550       | G    | <b>903.441802</b>  | 452.224539      | 886.415253     | 443.711265       | 885.431237     | 443.219257       | 8  |
| 6  | 656.324982  | 328.666129      | 639.298433     | 320.152855       | 638.314417     | 319.660847       | E    | 846.420338         | 423.713807      | 829.393789     | 415.200533       | 828.409773     | 414.708525       | 7  |
| 7  | 753.377746  | 377.192511      | 736.351197     | 368.679237       | 735.367181     | 368.187229       | P    | <b>717.377745</b>  | 359.192511      | 700.351196     | 350.679236       | 699.367180     | 350.187228       | 6  |
| 8  | 840.409774  | 420.708525      | 823.383225     | 412.195251       | 822.399209     | 411.703243       | S    | 620.324981         | 310.666129      | 603.298432     | 302.152854       | 602.314416     | 301.660846       | 5  |
| 9  | 968.504737  | 484.756007      | 951.478188     | 476.242732       | 950.494172     | 475.750724       | K    | <b>533.292953</b>  | 267.150115      | 516.266404     | 258.636840       | 515.282388     | 258.144832       | 4  |
| 10 | 1097.547330 | 549.277303      | 1080.520781    | 540.764029       | 1079.536765    | 540.272021       | E    | 405.197990         | 203.102633      | 388.171441     | 194.589359       | 387.187425     | 194.097351       | 3  |
| 11 | 1226.589923 | 613.798600      | 1209.563374    | 605.285325       | 1208.579358    | 604.793317       | E    | 276.155397         | 138.581337      | 259.128848     | 130.068062       | 258.144832     | 129.576054       | 2  |
| 12 |             |                 |                |                  |                |                  | K    | <b>147.112804</b>  | 74.060040       | 130.086255     | 65.546765        |                |                  | 1  |

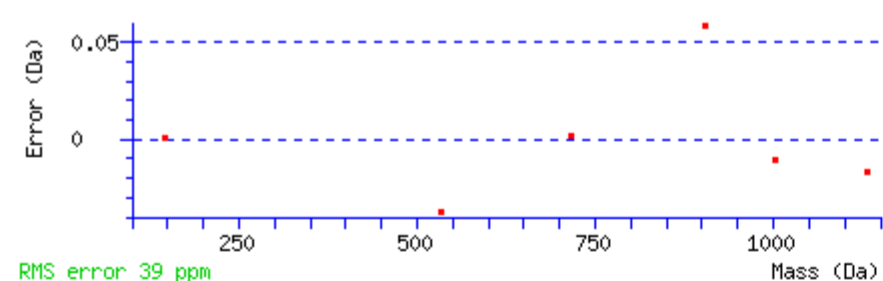

RMS error 39 ppm

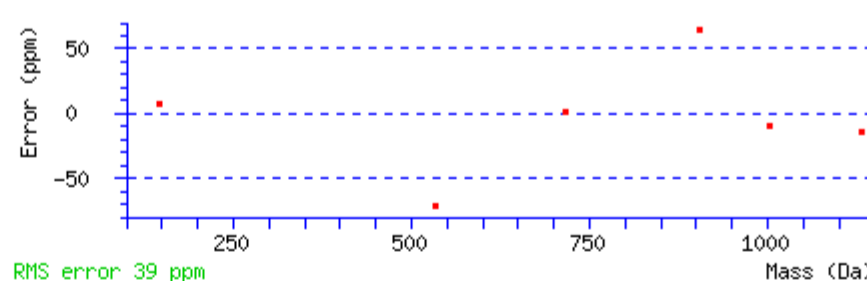

RMS error 39 ppm

NCBI BLAST search of [IQEVGEPKSEEEK](#)

(Parameters: blastp, nr protein database, expect=20000, no filter, PAM30)

Other BLAST [web gateways](#)

## All matches to this query

| Score | $M_r(\text{calc})$ : | Delta     | Sequence                      |
|-------|----------------------|-----------|-------------------------------|
| 45.3  | 1371.688141          | 0.003067  | <a href="#">IQEVGEPKSEEEK</a> |
| 8.5   | 1371.688141          | 0.003067  | <a href="#">QLEDELQDLAAK</a>  |
| 7.6   | 1371.699387          | -0.008179 | <a href="#">ELQVNISQQGEK</a>  |
| 7.1   | 1371.699387          | -0.008179 | <a href="#">RDVKNPDEDLASK</a> |
| 5.3   | 1371.699371          | -0.008163 | <a href="#">KPSASERLPDEK</a>  |
| 3.3   | 1371.678253          | 0.012955  | <a href="#">LYNTESQSFRK</a>   |

# MASCOT SEARCH RESULTS

## Peptide View

MS/MS Fragmentation of **QQSEEDLLLQDFSR**

Found in **SSRG\_HUMAN**, Translocon-associated protein subunit gamma OS=Homo sapiens GN=SSR3 PE=1 SV=1

Match to Query 51920: 1706.812808 from(854.413680,2+) rtinseconds(3422) index(47627)

Title: Locus:1.1.1.2453.43

Data file 2011-11-12 - TFD - EP 6-6.mgf

Click mouse within plot area to zoom in by factor of two about that point

Or, Plot from  to  Da

Label all possible matches  Label matches used for scoring

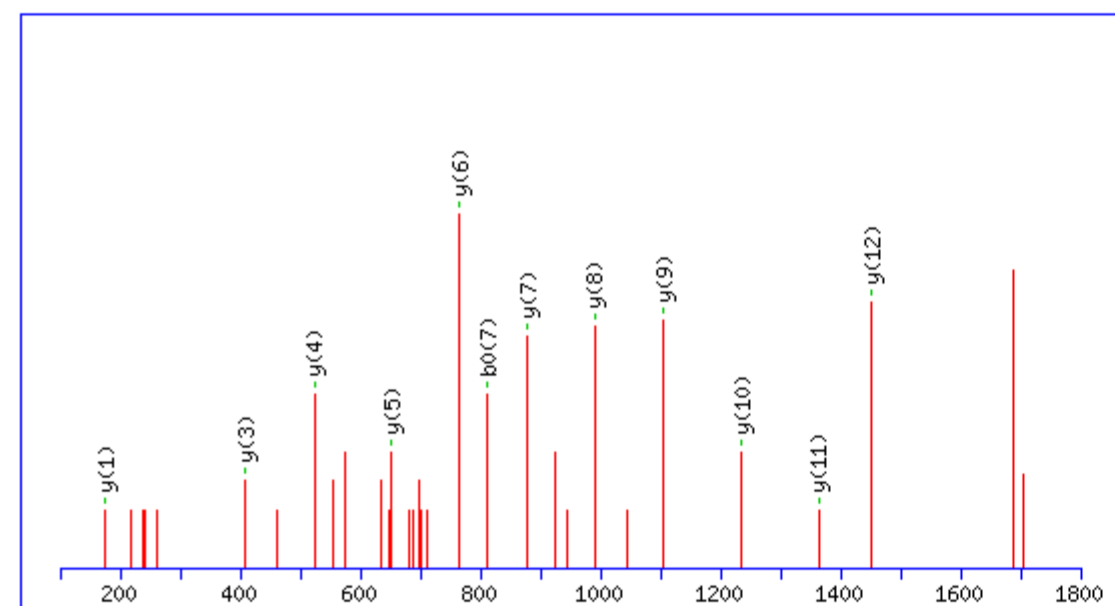

Monoisotopic mass of neutral peptide Mr(calc): 1706.811127

Fixed modifications: Propionamide (C) (apply to specified residues or termini only)

Ions Score: 115 Expect: 3.2e-011

Matches : 12/150 fragment ions using 13 most intense peaks [\(help\)](#)

| #  | b           | b <sup>++</sup> | b <sup>*</sup> | b <sup>*++</sup> | b <sup>0</sup>    | b <sup>0++</sup> | Seq. | y                  | y <sup>++</sup> | y <sup>*</sup> | y <sup>*++</sup> | y <sup>0</sup> | y <sup>0++</sup> | #  |
|----|-------------|-----------------|----------------|------------------|-------------------|------------------|------|--------------------|-----------------|----------------|------------------|----------------|------------------|----|
| 1  | 129.065854  | 65.036565       | 112.039305     | 56.523291        |                   |                  | Q    |                    |                 |                |                  |                |                  | 14 |
| 2  | 257.124432  | 129.065854      | 240.097883     | 120.552580       |                   |                  | Q    | 1579.759842        | 790.383559      | 1562.733293    | 781.870285       | 1561.749277    | 781.378277       | 13 |
| 3  | 344.156460  | 172.581868      | 327.129911     | 164.068593       | 326.145895        | 163.576585       | S    | <b>1451.701264</b> | 726.354270      | 1434.674715    | 717.840996       | 1433.690699    | 717.348988       | 12 |
| 4  | 473.199053  | 237.103164      | 456.172504     | 228.589890       | 455.188488        | 228.097882       | E    | <b>1364.669236</b> | 682.838256      | 1347.642687    | 674.324982       | 1346.658671    | 673.832974       | 11 |
| 5  | 602.241646  | 301.624461      | 585.215097     | 293.111187       | 584.231081        | 292.619179       | E    | <b>1235.626643</b> | 618.316960      | 1218.600094    | 609.803685       | 1217.616078    | 609.311677       | 10 |
| 6  | 717.268589  | 359.137933      | 700.242040     | 350.624658       | 699.258024        | 350.132650       | D    | <b>1106.584050</b> | 553.795663      | 1089.557501    | 545.282389       | 1088.573485    | 544.790381       | 9  |
| 7  | 830.352653  | 415.679965      | 813.326104     | 407.166690       | <b>812.342088</b> | 406.674682       | L    | <b>991.557107</b>  | 496.282192      | 974.530558     | 487.768917       | 973.546542     | 487.276909       | 8  |
| 8  | 943.436717  | 472.221997      | 926.410168     | 463.708722       | 925.426152        | 463.216714       | L    | <b>878.473043</b>  | 439.740160      | 861.446494     | 431.226885       | 860.462478     | 430.734877       | 7  |
| 9  | 1056.520781 | 528.764028      | 1039.494232    | 520.250754       | 1038.510216       | 519.758746       | L    | <b>765.388979</b>  | 383.198128      | 748.362430     | 374.684853       | 747.378414     | 374.192845       | 6  |
| 10 | 1184.579359 | 592.793318      | 1167.552810    | 584.280043       | 1166.568794       | 583.788035       | Q    | <b>652.304915</b>  | 326.656096      | 635.278366     | 318.142821       | 634.294350     | 317.650813       | 5  |
| 11 | 1299.606302 | 650.306789      | 1282.579753    | 641.793515       | 1281.595737       | 641.301507       | D    | <b>524.246337</b>  | 262.626807      | 507.219788     | 254.113532       | 506.235772     | 253.621524       | 4  |
| 12 | 1446.674716 | 723.840996      | 1429.648167    | 715.327722       | 1428.664151       | 714.835714       | F    | <b>409.219394</b>  | 205.113335      | 392.192845     | 196.600061       | 391.208829     | 196.108053       | 3  |
| 13 | 1533.706744 | 767.357010      | 1516.680195    | 758.843736       | 1515.696179       | 758.351728       | S    | 262.150980         | 131.579128      | 245.124431     | 123.065854       | 244.140415     | 122.573846       | 2  |
| 14 |             |                 |                |                  |                   |                  | R    | <b>175.118952</b>  | 88.063114       | 158.092403     | 79.549839        |                |                  | 1  |

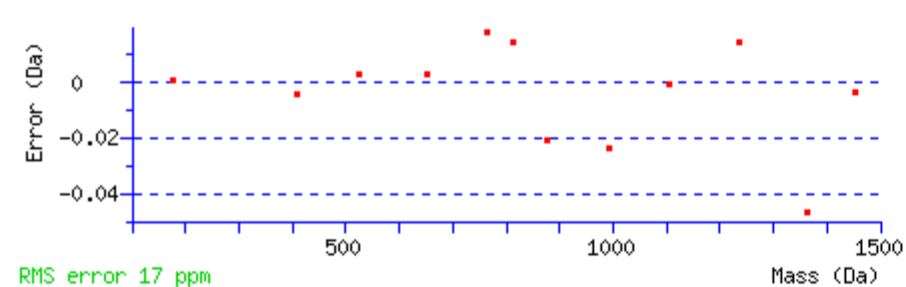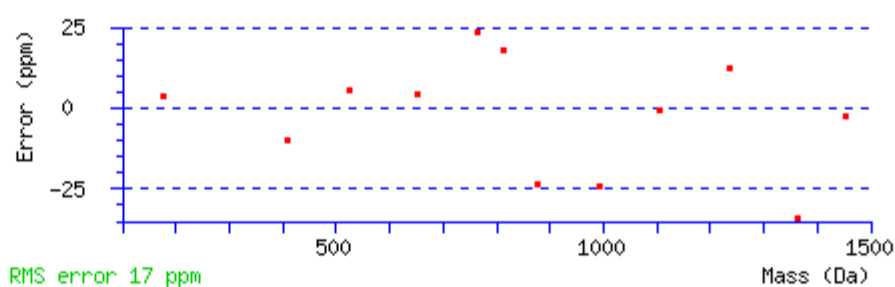

NCBI BLAST search of **QQSEEDLLLQDFSR**

(Parameters: blastp, nr protein database, expect=20000, no filter, PAM30)

Other BLAST [web gateways](#)

## All matches to this query

| Score | Mr(calc):   | Delta     | Sequence                         |
|-------|-------------|-----------|----------------------------------|
| 114.9 | 1706.811127 | 0.001681  | <a href="#">QQSEEDLLLQDFSR</a>   |
| 2.8   | 1706.829788 | -0.016980 | <a href="#">VLLMEFVDGGQVNDNR</a> |
| 2.0   | 1706.819366 | -0.006558 | <a href="#">MCSLPMARYYIIK</a>    |
| 0.5   | 1706.814514 | -0.001706 | <a href="#">ATDKGSPPMSEITSVR</a> |
| 0.2   | 1706.827286 | -0.014478 | <a href="#">VPHFFCDIRPVMK</a>    |

# **MATRIX** SCIENCE Mascot Search Results

## Peptide View

### MS/MS Fragmentation of **IEDLYTER**

Found in **TM9S3\_HUMAN**, Transmembrane 9 superfamily member 3 OS=Homo sapiens GN=TM9SF3 PE=1 SV=2

Match to Query 313189: 1037.505668 from(519.760110,2+) rtinseconds(1747) index(590253)

Title: Locus:1.1.1.987.24

Data file C:\Program Files (x86)\Matrix Science\Mascot Daemon\mgf3 TFD - Epitel - R2\mascot\_daemon\_merge.mgf

Click mouse within plot area to zoom in by factor of two about that point

Or, Plot from  to  Da

Label all possible matches  Label matches used for scoring

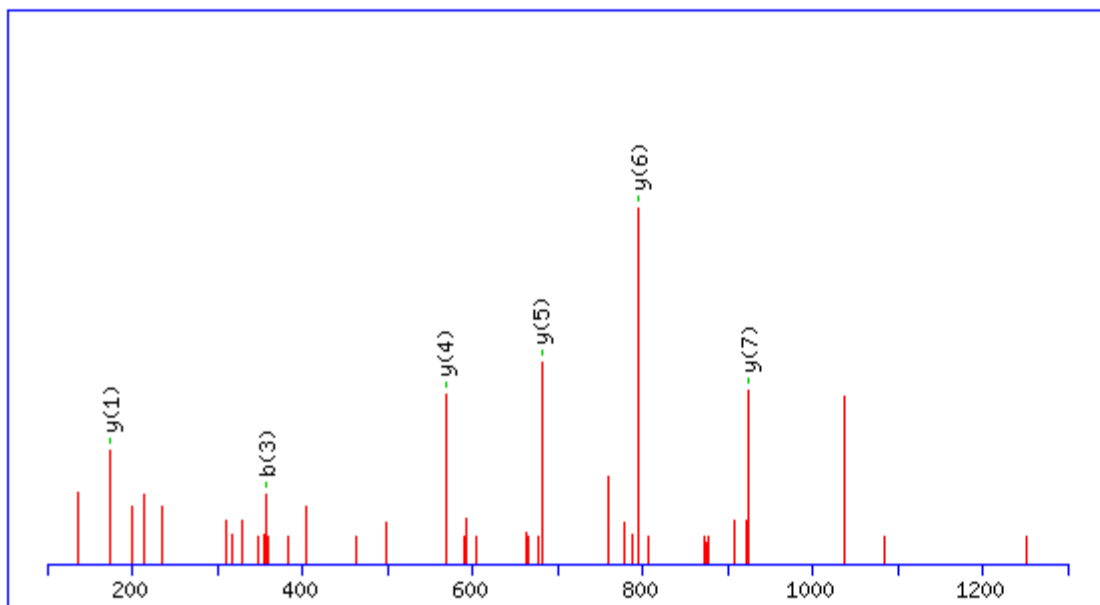

Monoisotopic mass of neutral peptide Mr(calc): 1037.502914

Fixed modifications: Carbamidomethyl (C) (apply to specified residues or termini only)

Ions Score: 37 Expect: 0.00084

Matches : 6/66 fragment ions using 8 most intense peaks ([help](#))

| # | b                 | b <sup>++</sup> | b <sup>0</sup> | b <sup>0++</sup> | Seq. | y                 | y <sup>++</sup> | y <sup>*</sup> | y <sup>*++</sup> | y <sup>0</sup> | y <sup>0++</sup> | # |
|---|-------------------|-----------------|----------------|------------------|------|-------------------|-----------------|----------------|------------------|----------------|------------------|---|
| 1 | 114.091340        | 57.549308       |                |                  | I    |                   |                 |                |                  |                |                  | 8 |
| 2 | 243.133933        | 122.070605      | 225.123368     | 113.065322       | E    | <b>925.426153</b> | 463.216715      | 908.399604     | 454.703440       | 907.415588     | 454.211432       | 7 |
| 3 | <b>358.160876</b> | 179.584076      | 340.150311     | 170.578794       | D    | <b>796.383560</b> | 398.695418      | 779.357011     | 390.182144       | 778.372995     | 389.690136       | 6 |
| 4 | 471.244940        | 236.126108      | 453.234375     | 227.120826       | L    | <b>681.356617</b> | 341.181947      | 664.330068     | 332.668672       | 663.346052     | 332.176664       | 5 |
| 5 | 634.308269        | 317.657773      | 616.297704     | 308.652490       | Y    | <b>568.272553</b> | 284.639915      | 551.246004     | 276.126640       | 550.261988     | 275.634632       | 4 |
| 6 | 735.355948        | 368.181612      | 717.345383     | 359.176330       | T    | 405.209224        | 203.108250      | 388.182675     | 194.594976       | 387.198659     | 194.102968       | 3 |
| 7 | 864.398541        | 432.702909      | 846.387976     | 423.697626       | E    | 304.161545        | 152.584411      | 287.134996     | 144.071136       | 286.150980     | 143.579128       | 2 |
| 8 |                   |                 |                |                  | R    | <b>175.118952</b> | 88.063114       | 158.092403     | 79.549840        |                |                  | 1 |

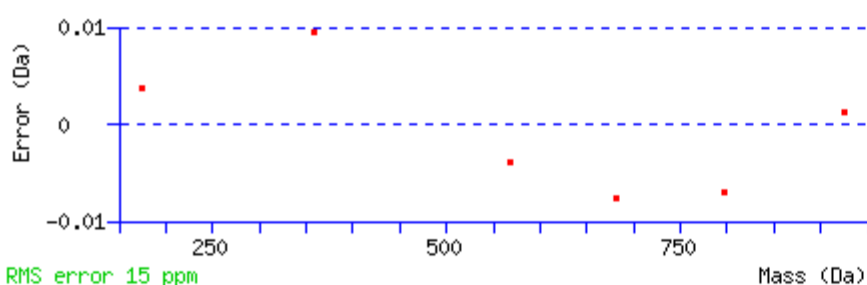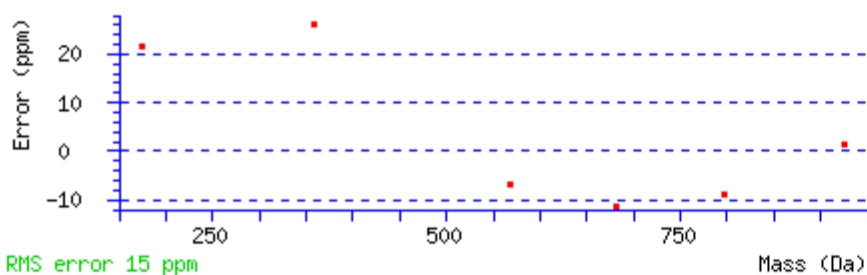

### NCBI BLAST search of **IEDLYTER**

(Parameters: blastp, nr protein database, expect=20000, no filter, PAM30)

Other BLAST [web gateways](#)

### All matches to this query

| Score | Mr(calc):   | Delta     | Sequence                   |
|-------|-------------|-----------|----------------------------|
| 36.7  | 1037.502914 | 0.002754  | <a href="#">IEDLYTER</a>   |
| 3.8   | 1037.511673 | -0.006005 | <a href="#">LHFGHPAIM</a>  |
| 3.1   | 1037.496414 | 0.009254  | <a href="#">LADFGSCLR</a>  |
| 1.5   | 1037.514160 | -0.008492 | <a href="#">ELPSGPGPER</a> |

# MASCOT Search Results

## Peptide View

MS/MS Fragmentation of **ALPILEELLR**

Found in **TMTC3\_HUMAN**, Transmembrane and TPR repeat-containing protein 3 OS=Homo sapiens GN=TMTC3 PE=1 SV=2

Match to Query 27188: 1165.710428 from(583.862490,2+) rtinseconds(4339) index(66294)

Title: Locus:1.1.1.2947.10

Data file 2011-11-12 - TFD - EP 6-1.mgf

Click mouse within plot area to zoom in by factor of two about that point

Or, Plot from  to  Da

Label all possible matches  Label matches used for scoring

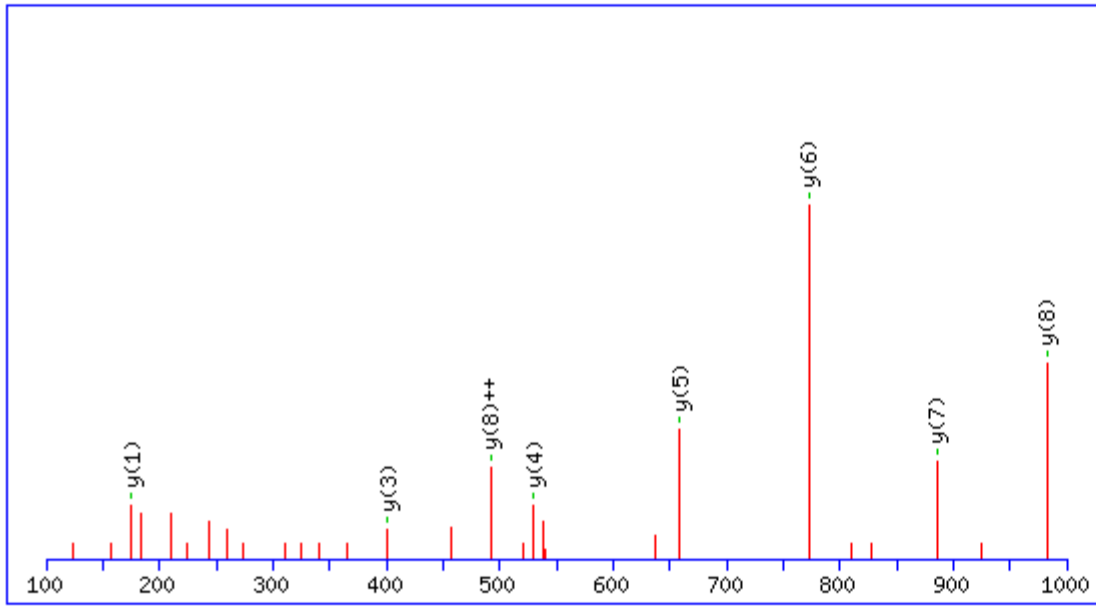

Monoisotopic mass of neutral peptide Mr(calc): 1165.707016

Fixed modifications: Propionamide (C) (apply to specified residues or termini only)

Ions Score: 65 Expect: 3.8e-007

Matches : 8/74 fragment ions using 9 most intense peaks ([help](#))

| #  | b          | b <sup>++</sup> | b <sup>0</sup> | b <sup>0++</sup> | Seq. | y                 | y <sup>++</sup>   | y <sup>*</sup> | y <sup>*++</sup> | y <sup>0</sup> | y <sup>0++</sup> | #  |
|----|------------|-----------------|----------------|------------------|------|-------------------|-------------------|----------------|------------------|----------------|------------------|----|
| 1  | 72.044390  | 36.525833       |                |                  | A    |                   |                   |                |                  |                |                  | 10 |
| 2  | 185.128454 | 93.067865       |                |                  | L    | 1095.677222       | 548.342249        | 1078.650673    | 539.828975       | 1077.666657    | 539.336967       | 9  |
| 3  | 282.181218 | 141.594247      |                |                  | P    | <b>982.593158</b> | <b>491.800217</b> | 965.566609     | 483.286943       | 964.582593     | 482.794935       | 8  |
| 4  | 395.265282 | 198.136279      |                |                  | I    | <b>885.540394</b> | 443.273835        | 868.513845     | 434.760561       | 867.529829     | 434.268553       | 7  |
| 5  | 508.349346 | 254.678311      |                |                  | L    | <b>772.456330</b> | 386.731803        | 755.429781     | 378.218529       | 754.445765     | 377.726521       | 6  |
| 6  | 637.391939 | 319.199608      | 619.381374     | 310.194325       | E    | <b>659.372266</b> | 330.189771        | 642.345717     | 321.676497       | 641.361701     | 321.184489       | 5  |
| 7  | 766.434532 | 383.720904      | 748.423967     | 374.715622       | E    | <b>530.329673</b> | 265.668475        | 513.303124     | 257.155200       | 512.319108     | 256.663192       | 4  |
| 8  | 879.518596 | 440.262936      | 861.508031     | 431.257654       | L    | <b>401.287080</b> | 201.147178        | 384.260531     | 192.633904       |                |                  | 3  |
| 9  | 992.602660 | 496.804968      | 974.592095     | 487.799686       | L    | 288.203016        | 144.605146        | 271.176467     | 136.091872       |                |                  | 2  |
| 10 |            |                 |                |                  | R    | <b>175.118952</b> | 88.063114         | 158.092403     | 79.549840        |                |                  | 1  |

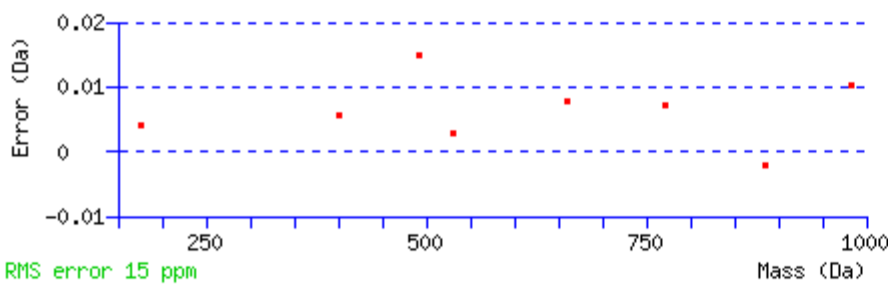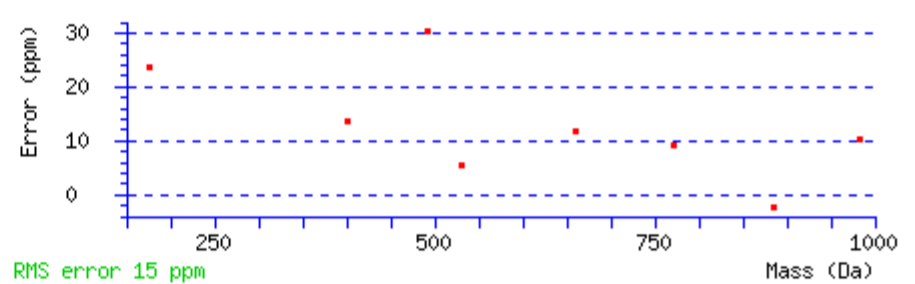

NCBI BLAST search of [ALPILEELLR](#)

(Parameters: blastp, nr protein database, expect=20000, no filter, PAM30)

Other BLAST [web gateways](#)

All matches to this query

| Score | Mr(calc):   | Delta    | Sequence                   |
|-------|-------------|----------|----------------------------|
| 65.4  | 1165.707016 | 0.003412 | <a href="#">ALPILEELLR</a> |

Mascot: <http://www.matrixscience.com/>

# MASCOT Search Results

## Peptide View

MS/MS Fragmentation of **AVSDSFGPGGEWDDR**

Found in **TMBI1\_HUMAN**, Transmembrane BAX inhibitor motif-containing protein 1 OS=Homo sapiens GN=TMBIM1 PE=1 SV=2

Match to Query 47756: 1536.655828 from(769.335190,2+) rtinseconds(2551) index(32142)

Title: Locus:1.1.1.2316.47

Data file 2011-11-10 - TFD - EP 4-1.mgf

Click mouse within plot area to zoom in by factor of two about that point

Or, Plot from  to  Da

Label all possible matches  Label matches used for scoring

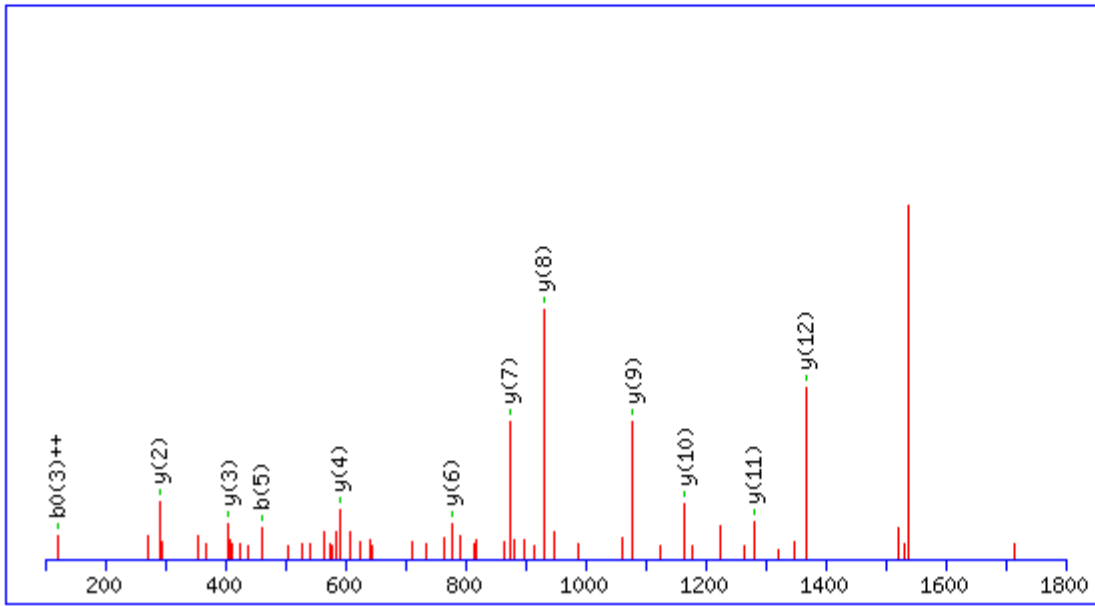

Monoisotopic mass of neutral peptide Mr(calc): 1536.648117

Fixed modifications: Propionamide (C) (apply to specified residues or termini only)

Ions Score: 95 Expect: 9.9e-010

Matches : 12/124 fragment ions using 14 most intense peaks ([help](#))

| #  | b           | b <sup>++</sup> | b <sup>0</sup> | b <sup>0++</sup> | Seq. | y           | y <sup>++</sup> | y <sup>*</sup> | y <sup>*++</sup> | y <sup>0</sup> | y <sup>0++</sup> | #  |
|----|-------------|-----------------|----------------|------------------|------|-------------|-----------------|----------------|------------------|----------------|------------------|----|
| 1  | 72.044390   | 36.525833       |                |                  | A    |             |                 |                |                  |                |                  | 14 |
| 2  | 171.112804  | 86.060040       |                |                  | V    | 1466.618263 | 733.812770      | 1449.591714    | 725.299495       | 1448.607698    | 724.807487       | 13 |
| 3  | 258.144832  | 129.576054      | 240.134267     | 120.570772       | S    | 1367.549849 | 684.278563      | 1350.523300    | 675.765288       | 1349.539284    | 675.273280       | 12 |
| 4  | 373.171775  | 187.089526      | 355.161210     | 178.084243       | D    | 1280.517821 | 640.762549      | 1263.491272    | 632.249274       | 1262.507256    | 631.757266       | 11 |
| 5  | 460.203803  | 230.605540      | 442.193238     | 221.600257       | S    | 1165.490878 | 583.249077      | 1148.464329    | 574.735803       | 1147.480313    | 574.243795       | 10 |
| 6  | 607.272217  | 304.139747      | 589.261652     | 295.134464       | F    | 1078.458850 | 539.733063      | 1061.432301    | 531.219789       | 1060.448285    | 530.727781       | 9  |
| 7  | 664.293681  | 332.650479      | 646.283116     | 323.645196       | G    | 931.390436  | 466.198856      | 914.363887     | 457.685582       | 913.379871     | 457.193574       | 8  |
| 8  | 761.346445  | 381.176861      | 743.335880     | 372.171578       | P    | 874.368972  | 437.688124      | 857.342423     | 429.174850       | 856.358407     | 428.682842       | 7  |
| 9  | 818.367909  | 409.687593      | 800.357344     | 400.682310       | G    | 777.316208  | 389.161742      | 760.289659     | 380.648468       | 759.305643     | 380.156460       | 6  |
| 10 | 947.410502  | 474.208889      | 929.399937     | 465.203607       | E    | 720.294744  | 360.651010      | 703.268195     | 352.137736       | 702.284179     | 351.645728       | 5  |
| 11 | 1133.489815 | 567.248546      | 1115.479250    | 558.243263       | W    | 591.252151  | 296.129714      | 574.225602     | 287.616439       | 573.241586     | 287.124431       | 4  |
| 12 | 1248.516758 | 624.762017      | 1230.506193    | 615.756735       | D    | 405.172838  | 203.090057      | 388.146289     | 194.576783       | 387.162273     | 194.084775       | 3  |
| 13 | 1363.543701 | 682.275489      | 1345.533136    | 673.270206       | D    | 290.145895  | 145.576585      | 273.119346     | 137.063311       | 272.135330     | 136.571303       | 2  |
| 14 |             |                 |                |                  | R    | 175.118952  | 88.063114       | 158.092403     | 79.549839        |                |                  | 1  |

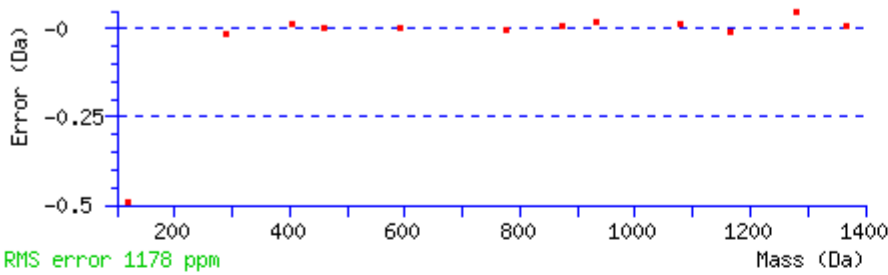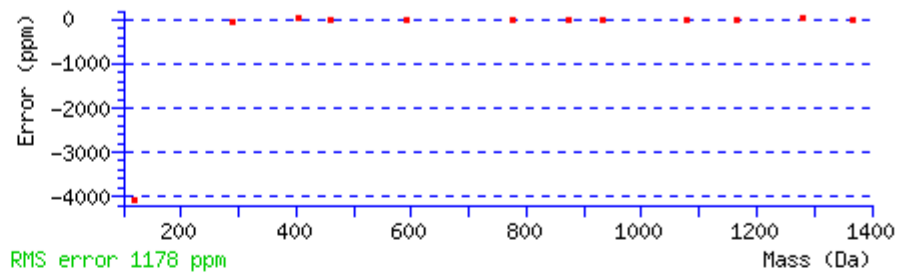

NCBI BLAST search of [AVSDSFGPGGEWDDR](#)

(Parameters: blastp, nr protein database, expect=20000, no filter, PAM30)

Other BLAST [web gateways](#)

All matches to this query

| Score | Mr(calc):   | Delta    | Sequence                        |
|-------|-------------|----------|---------------------------------|
| 95.2  | 1536.648117 | 0.007711 | <a href="#">AVSDSFGPGGEWDDR</a> |

Mascot: <http://www.matrixscience.com/>

# MASCOT SCIENCE Mascot Search Results

## Peptide View

MS/MS Fragmentation of **TVIDSQTHYR**

Found in **TMED3\_HUMAN**, Transmembrane emp24 domain-containing protein 3 OS=Homo sapiens GN=TMED3 PE=2 SV=1

Match to Query 543146: 1218.596448 from(610.305500,2+) rtinseconds(1247) index(741974)

Title: Locus:1.1.1.815.39

Data file C:\Program Files (x86)\Matrix Science\Mascot Daemon\mgf3 TFD - Epitel - R2\mascot\_daemon\_merge.mgf

Click mouse within plot area to zoom in by factor of two about that point

Or, Plot from  to  Da

Label all possible matches  Label matches used for scoring

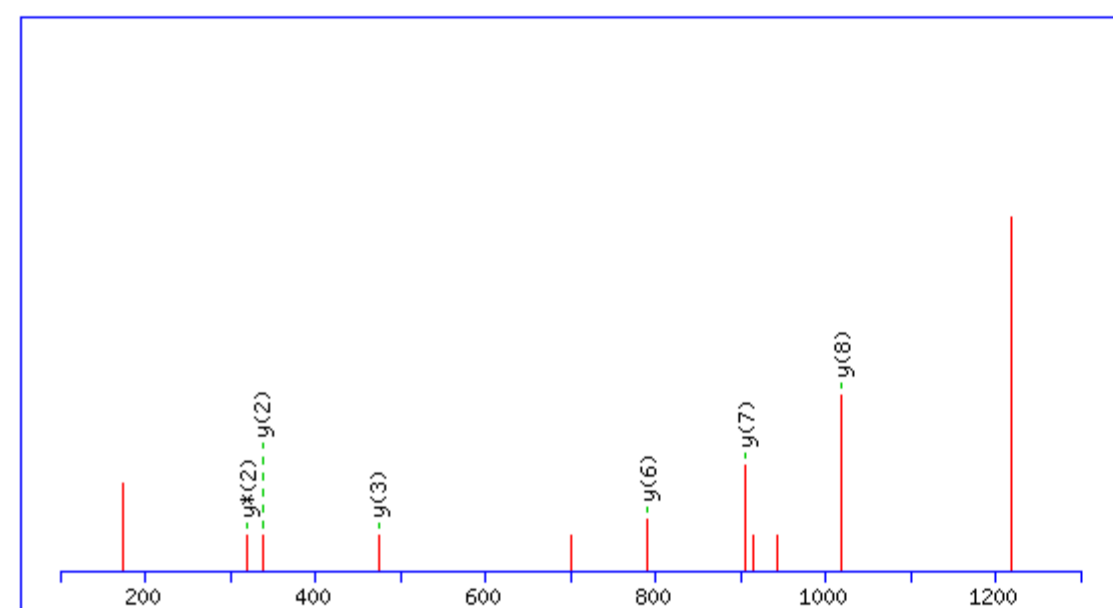

Monoisotopic mass of neutral peptide Mr(calc): 1218.599304

Fixed modifications: Carbamidomethyl (C) (apply to specified residues or termini only)

Ions Score: 38 Expect: 0.0025

Matches : 6/92 fragment ions using 9 most intense peaks ([help](#))

| #  | b           | b <sup>++</sup> | b <sup>*</sup> | b <sup>*++</sup> | b <sup>0</sup> | b <sup>0++</sup> | Seq. | y                  | y <sup>++</sup> | y <sup>*</sup>    | y <sup>*++</sup> | y <sup>0</sup> | y <sup>0++</sup> | #  |
|----|-------------|-----------------|----------------|------------------|----------------|------------------|------|--------------------|-----------------|-------------------|------------------|----------------|------------------|----|
| 1  | 102.054955  | 51.531116       |                |                  | 84.044390      | 42.525833        | T    |                    |                 |                   |                  |                |                  | 10 |
| 2  | 201.123369  | 101.065322      |                |                  | 183.112804     | 92.060040        | V    | 1118.558899        | 559.783088      | 1101.532350       | 551.269813       | 1100.548334    | 550.777805       | 9  |
| 3  | 314.207433  | 157.607354      |                |                  | 296.196868     | 148.602072       | I    | <b>1019.490485</b> | 510.248881      | 1002.463936       | 501.735606       | 1001.479920    | 501.243598       | 8  |
| 4  | 429.234376  | 215.120826      |                |                  | 411.223811     | 206.115544       | D    | <b>906.406421</b>  | 453.706849      | 889.379872        | 445.193574       | 888.395856     | 444.701566       | 7  |
| 5  | 516.266404  | 258.636840      |                |                  | 498.255839     | 249.631558       | S    | <b>791.379478</b>  | 396.193377      | 774.352929        | 387.680103       | 773.368913     | 387.188095       | 6  |
| 6  | 644.324982  | 322.666129      | 627.298433     | 314.152855       | 626.314417     | 313.660847       | Q    | 704.347450         | 352.677363      | 687.320901        | 344.164089       | 686.336885     | 343.672081       | 5  |
| 7  | 745.372661  | 373.189969      | 728.346112     | 364.676694       | 727.362096     | 364.184686       | T    | 576.288872         | 288.648074      | 559.262323        | 280.134800       | 558.278307     | 279.642792       | 4  |
| 8  | 882.431573  | 441.719425      | 865.405024     | 433.206150       | 864.421008     | 432.714142       | H    | <b>475.241193</b>  | 238.124234      | 458.214644        | 229.610960       |                |                  | 3  |
| 9  | 1045.494902 | 523.251089      | 1028.468353    | 514.737815       | 1027.484337    | 514.245807       | Y    | <b>338.182281</b>  | 169.594778      | <b>321.155732</b> | 161.081504       |                |                  | 2  |
| 10 |             |                 |                |                  |                |                  | R    | 175.118952         | 88.063114       | 158.092403        | 79.549839        |                |                  | 1  |

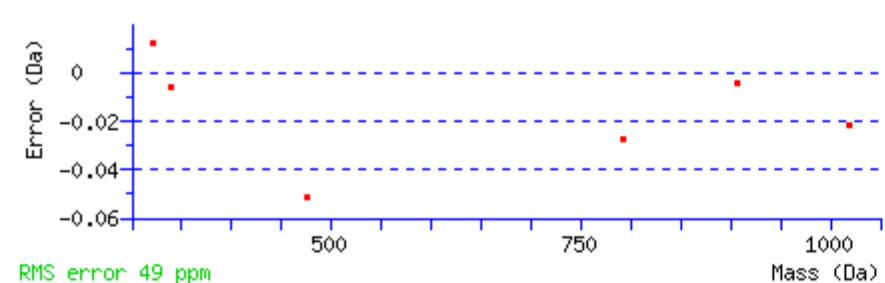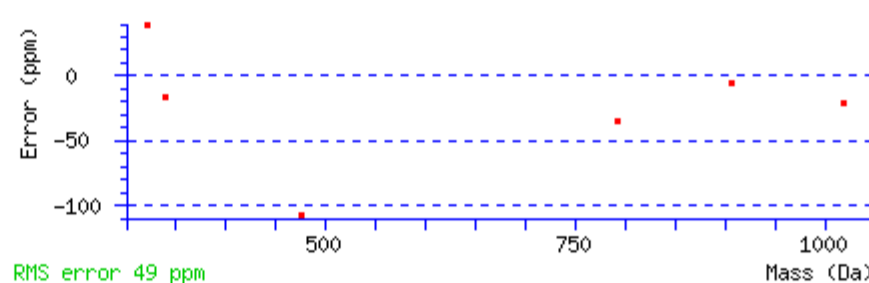

NCBI BLAST search of [TVIDSQTHYR](#)

(Parameters: blastp, nr protein database, expect=20000, no filter, PAM30)

Other BLAST [web gateways](#)

All matches to this query

| Score | Mr(calc):   | Delta     | Sequence                     |
|-------|-------------|-----------|------------------------------|
| 37.9  | 1218.599304 | -0.002856 | <a href="#">TVIDSQTHYR</a>   |
| 10.7  | 1218.595459 | 0.000989  | <a href="#">SSPPPPPALPPM</a> |
| 5.7   | 1218.599304 | -0.002856 | <a href="#">SPPPGPDGHAKK</a> |
| 5.2   | 1218.591431 | 0.005017  | <a href="#">SLPQGEKVQAM</a>  |
| 3.9   | 1218.588074 | 0.008374  | <a href="#">SPDPFGAVAAQK</a> |
| 3.4   | 1218.588074 | 0.008374  | <a href="#">LSPFSPPSPAR</a>  |
| 3.4   | 1218.591431 | 0.005017  | <a href="#">SPIERAVAPTM</a>  |
| 1.2   | 1218.602661 | -0.006213 | <a href="#">SLRQKPGDSTM</a>  |

Mascot: <http://www.matrixscience.com/>

**Peptide View**

MS/MS Fragmentation of **LEDILESINSIK**

Found in **TMED5\_HUMAN**, Transmembrane emp24 domain-containing protein 5 OS=Homo sapiens GN=TMED5 PE=1 SV=1

Match to Query 39362: 1372.744108 from(687.379330,2+) rtinseconds(3479) index(49032)

Title: Locus:1.1.1.2614.31

Data file 2011-11-12 - TFD - EP 6-5.mgf

Click mouse within plot area to zoom in by factor of two about that point

Or, Plot from  to  Da

Label all possible matches  Label matches used for scoring

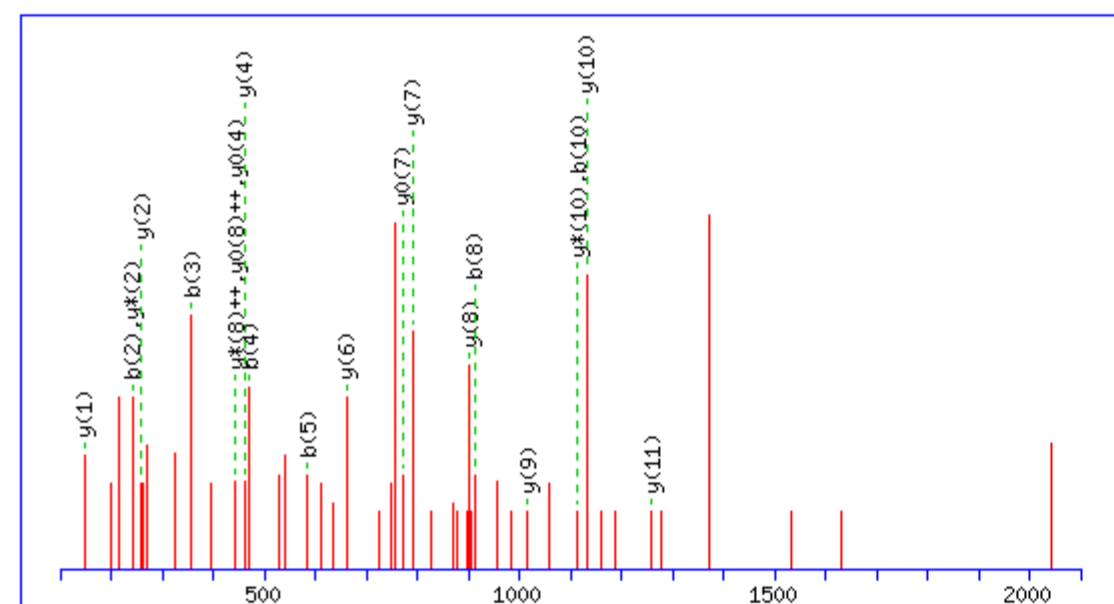

Monoisotopic mass of neutral peptide Mr(calc): 1372.744919

Fixed modifications: Propionamide (C) (apply to specified residues or termini only)

Ions Score: 45 Expect: 0.00037

Matches : 21/110 fragment ions using 43 most intense peaks [\(help\)](#)

| #  | b                  | b <sup>++</sup> | b <sup>+</sup> | b <sup>+++</sup> | b <sup>0</sup> | b <sup>0++</sup> | Seq. | y                  | y <sup>++</sup> | y <sup>+</sup>     | y <sup>+++</sup>  | y <sup>0</sup>    | y <sup>0++</sup>  | #  |
|----|--------------------|-----------------|----------------|------------------|----------------|------------------|------|--------------------|-----------------|--------------------|-------------------|-------------------|-------------------|----|
| 1  | 114.091340         | 57.549308       |                |                  |                |                  | L    |                    |                 |                    |                   |                   |                   | 12 |
| 2  | <b>243.133933</b>  | 122.070605      |                |                  | 225.123368     | 113.065322       | E    | <b>1260.668172</b> | 630.837724      | 1243.641623        | 622.324450        | 1242.657607       | 621.832442        | 11 |
| 3  | <b>358.160876</b>  | 179.584076      |                |                  | 340.150311     | 170.578794       | D    | <b>1131.625579</b> | 566.316428      | <b>1114.599030</b> | 557.803153        | 1113.615014       | 557.311145        | 10 |
| 4  | <b>471.244940</b>  | 236.126108      |                |                  | 453.234375     | 227.120826       | I    | <b>1016.598636</b> | 508.802956      | 999.572087         | 500.289681        | 998.588071        | 499.797673        | 9  |
| 5  | <b>584.329004</b>  | 292.668140      |                |                  | 566.318439     | 283.662858       | L    | <b>903.514572</b>  | 452.260924      | 886.488023         | <b>443.747650</b> | 885.504007        | <b>443.255642</b> | 8  |
| 6  | 713.371597         | 357.189437      |                |                  | 695.361032     | 348.184154       | E    | <b>790.430508</b>  | 395.718892      | 773.403959         | 387.205618        | <b>772.419943</b> | 386.713610        | 7  |
| 7  | 800.403625         | 400.705451      |                |                  | 782.393060     | 391.700168       | S    | <b>661.387915</b>  | 331.197596      | 644.361366         | 322.684321        | 643.377350        | 322.192313        | 6  |
| 8  | <b>913.487689</b>  | 457.247483      |                |                  | 895.477124     | 448.242200       | I    | 574.355887         | 287.681582      | 557.329338         | 279.168307        | 556.345322        | 278.676299        | 5  |
| 9  | 1027.530616        | 514.268946      | 1010.504067    | 505.755672       | 1009.520051    | 505.263664       | N    | <b>461.271823</b>  | 231.139549      | 444.245274         | 222.626275        | <b>443.261258</b> | 222.134267        | 4  |
| 10 | <b>1114.562644</b> | 557.784960      | 1097.536095    | 549.271686       | 1096.552079    | 548.779678       | S    | 347.228896         | 174.118086      | 330.202347         | 165.604811        | 329.218331        | 165.112803        | 3  |
| 11 | 1227.646708        | 614.326992      | 1210.620159    | 605.813718       | 1209.636143    | 605.321710       | I    | <b>260.196868</b>  | 130.602072      | <b>243.170319</b>  | 122.088797        |                   |                   | 2  |
| 12 |                    |                 |                |                  |                |                  | K    | <b>147.112804</b>  | 74.060040       | 130.086255         | 65.546765         |                   |                   | 1  |

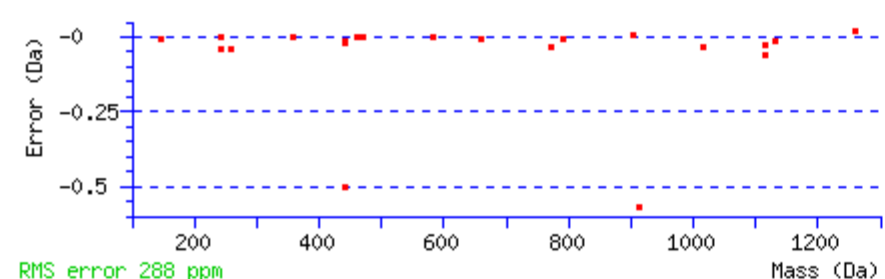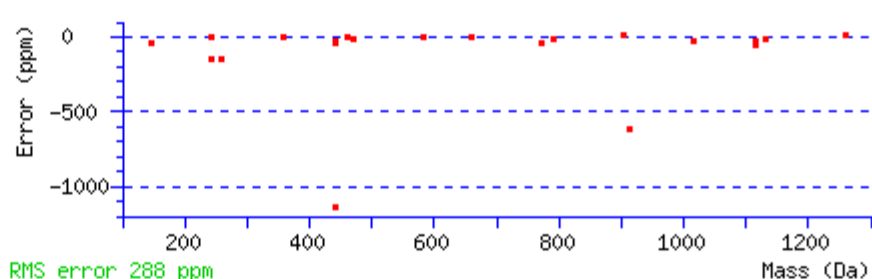

NCBI BLAST search of [LEDILESINSIK](#)

(Parameters: blastp, nr protein database, expect=20000, no filter, PAM30)

Other BLAST [web gateways](#)

**All matches to this query**

| Score | Mr(calc):   | Delta     | Sequence                        |
|-------|-------------|-----------|---------------------------------|
| 45.5  | 1372.744919 | -0.000811 | <a href="#">LEDILESINSIK</a>    |
| 13.5  | 1372.735062 | 0.009046  | <a href="#">EIDPPFRPKVK</a>     |
| 7.9   | 1372.735031 | 0.009077  | <a href="#">LEDLNFPEIKR</a>     |
| 6.4   | 1372.738419 | 0.005689  | <a href="#">GSDGGSMLKALPLK</a>  |
| 4.8   | 1372.735046 | 0.009062  | <a href="#">GQEGVKWSELIK</a>    |
| 4.8   | 1372.756195 | -0.012087 | <a href="#">LTQQDTSVLQLK</a>    |
| 4.2   | 1372.746307 | -0.002199 | <a href="#">HGAIPGGLSIGPPGK</a> |
| 4.1   | 1372.746292 | -0.002184 | <a href="#">KGASFQTVASLHK</a>   |
| 3.7   | 1372.738403 | 0.005705  | <a href="#">LECSKLQPSAVK</a>    |
| 3.1   | 1372.756180 | -0.012072 | <a href="#">TQQSLAAIVDSLK</a>   |

**Peptide View**

**MS/MS Fragmentation of AYVPIAQVK**

Found in GPNMB\_HUMAN, Transmembrane glycoprotein NMB OS=Homo sapiens GN=GPNMB PE=1 SV=2

Match to Query 15003: 987.575988 from(494.795270,2+) rtinseconds(1928) index(16349)

Title: Locus:1.1.1.2090.22

Data file 2011-11-14 - TFD - EP 8-7.mgf

Click mouse within plot area to zoom in by factor of two about that point

Or, Plot from  to  Da

Label all possible matches  Label matches used for scoring

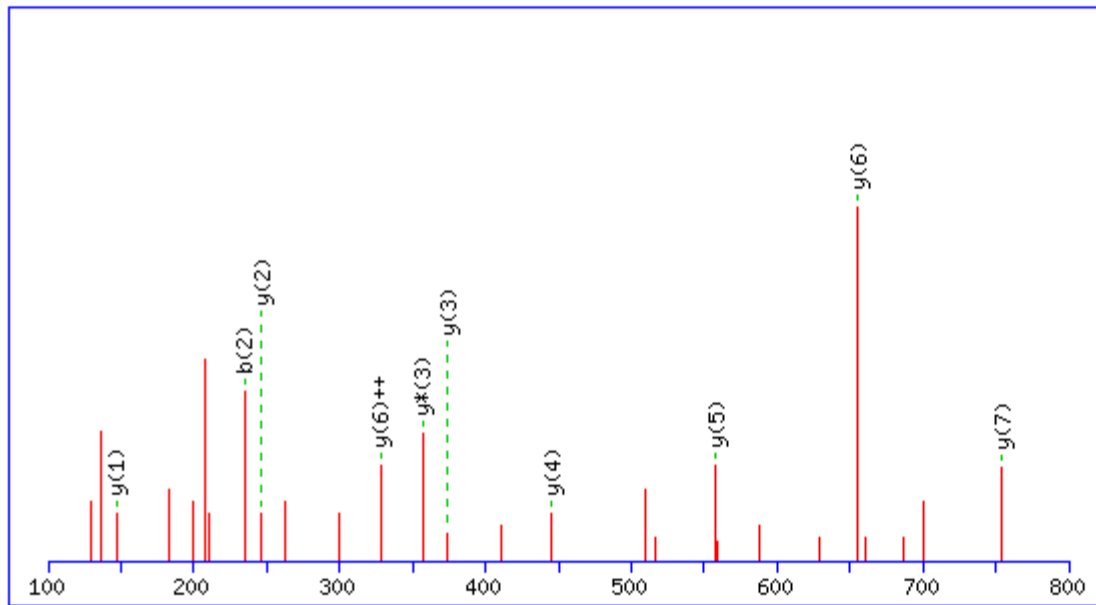

**Monoisotopic mass of neutral peptide Mr(calc): 987.575302**

**Fixed modifications:** Propionamide (C) (apply to specified residues or termini only)

**Ions Score:** 35 **Expect:** 0.0016

**Matches :** 10/52 fragment ions using 27 most intense peaks ([help](#))

| # | b                                           | b <sup>++</sup> | b <sup>*</sup> | b <sup>*++</sup> | Seq. | y                                           | y <sup>++</sup>                             | y <sup>*</sup>                              | y <sup>*++</sup> | # |
|---|---------------------------------------------|-----------------|----------------|------------------|------|---------------------------------------------|---------------------------------------------|---------------------------------------------|------------------|---|
| 1 | 72.044390                                   | 36.525833       |                |                  | A    |                                             |                                             |                                             |                  | 9 |
| 2 | <span style="color: red;">235.107719</span> | 118.057498      |                |                  | Y    | 917.545481                                  | 459.276379                                  | 900.518932                                  | 450.763104       | 8 |
| 3 | 334.176133                                  | 167.591704      |                |                  | V    | <span style="color: red;">754.482152</span> | 377.744714                                  | 737.455603                                  | 369.231440       | 7 |
| 4 | 431.228897                                  | 216.118087      |                |                  | P    | <span style="color: red;">655.413738</span> | <span style="color: red;">328.210507</span> | 638.387189                                  | 319.697233       | 6 |
| 5 | 544.312961                                  | 272.660119      |                |                  | I    | <span style="color: red;">558.360974</span> | 279.684125                                  | 541.334425                                  | 271.170851       | 5 |
| 6 | 615.350075                                  | 308.178676      |                |                  | A    | <span style="color: red;">445.276910</span> | 223.142093                                  | 428.250361                                  | 214.628818       | 4 |
| 7 | 743.408653                                  | 372.207965      | 726.382104     | 363.694690       | Q    | <span style="color: red;">374.239796</span> | 187.623536                                  | <span style="color: red;">357.213247</span> | 179.110261       | 3 |
| 8 | 842.477067                                  | 421.742172      | 825.450518     | 413.228897       | V    | <span style="color: red;">246.181218</span> | 123.594247                                  | 229.154669                                  | 115.080972       | 2 |
| 9 |                                             |                 |                |                  | K    | <span style="color: red;">147.112804</span> | 74.060040                                   | 130.086255                                  | 65.546765        | 1 |

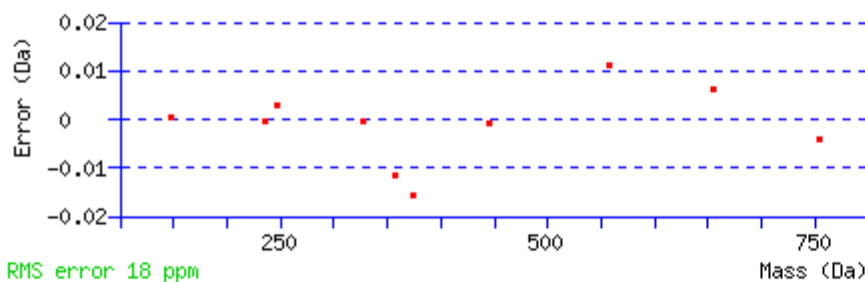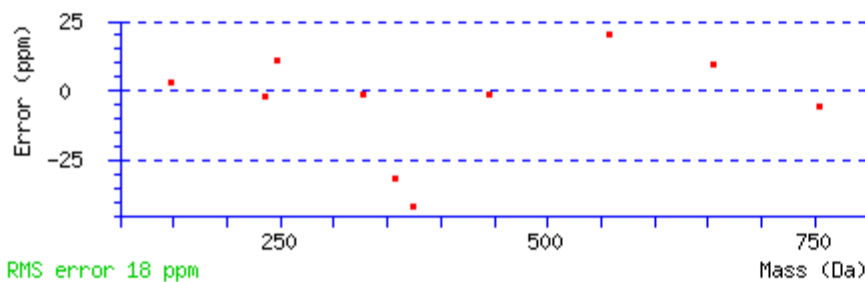

**NCBI BLAST search of AYVPIAQVK**

(Parameters: blastp, nr protein database, expect=20000, no filter, PAM30)

Other BLAST [web gateways](#)

**All matches to this query**

| Score | Mr(calc):  | Delta    | Sequence                  |
|-------|------------|----------|---------------------------|
| 35.2  | 987.575302 | 0.000686 | <a href="#">AYVPIAQVK</a> |



**Peptide View**

MS/MS Fragmentation of **MVLPPDRR**

Found in **TM121\_HUMAN**, Transmembrane protein 121 OS=Homo sapiens GN=TMEM121 PE=2 SV=1

Match to Query 20956: 1079.586308 from(540.800430,2+) rtinseconds(2253) index(26681)

Title: Locus:1.1.1.2285.22

Data file 2011-11-10 - TFD - EP 3-1.mgf

Click mouse within plot area to zoom in by factor of two about that point

Or, Plot from  to  Da

Label all possible matches  Label matches used for scoring

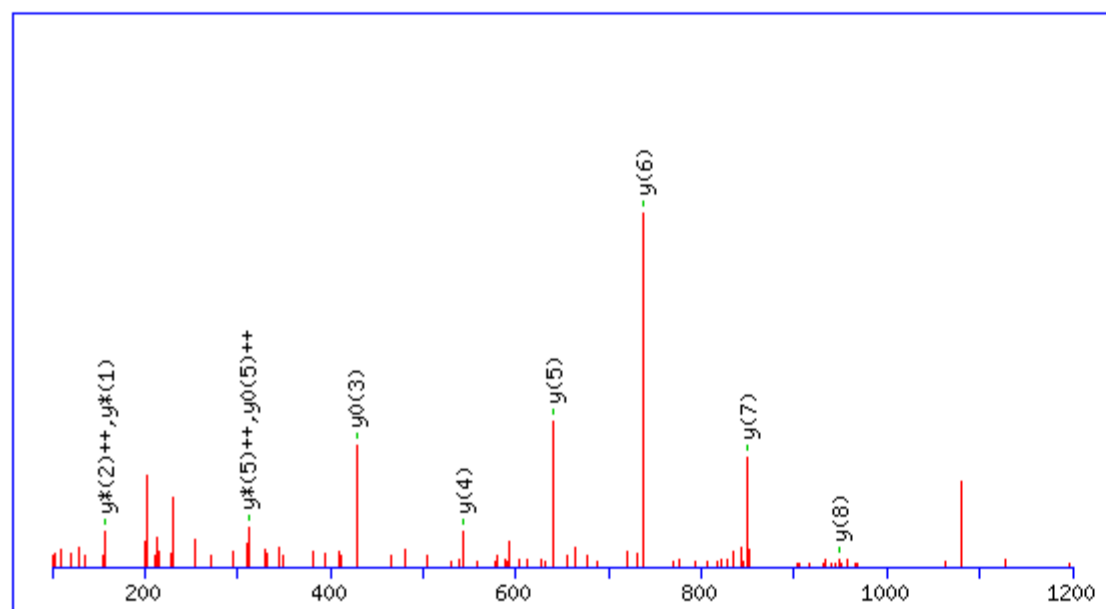

Monoisotopic mass of neutral peptide Mr(calc): 1079.590973

Fixed modifications: Propionamide (C) (apply to specified residues or termini only)

Ions Score: 45 Expect: 0.00022

Matches : 10/66 fragment ions using 10 most intense peaks [\(help\)](#)

| # | b          | b <sup>++</sup> | b <sup>*</sup> | b <sup>*++</sup> | b <sup>0</sup> | b <sup>0++</sup> | Seq. | y          | y <sup>++</sup> | y <sup>*</sup> | y <sup>*++</sup> | y <sup>0</sup> | y <sup>0++</sup> | # |
|---|------------|-----------------|----------------|------------------|----------------|------------------|------|------------|-----------------|----------------|------------------|----------------|------------------|---|
| 1 | 132.047761 | 66.527518       |                |                  |                |                  | M    |            |                 |                |                  |                |                  | 9 |
| 2 | 231.116175 | 116.061725      |                |                  |                |                  | V    | 949.557776 | 475.282526      | 932.531227     | 466.769252       | 931.547211     | 466.277244       | 8 |
| 3 | 344.200239 | 172.603758      |                |                  |                |                  | L    | 850.489362 | 425.748319      | 833.462813     | 417.235045       | 832.478797     | 416.743037       | 7 |
| 4 | 441.253003 | 221.130139      |                |                  |                |                  | P    | 737.405298 | 369.206287      | 720.378749     | 360.693013       | 719.394733     | 360.201005       | 6 |
| 5 | 538.305767 | 269.656522      |                |                  |                |                  | P    | 640.352534 | 320.679905      | 623.325985     | 312.166631       | 622.341969     | 311.674623       | 5 |
| 6 | 635.358531 | 318.182904      |                |                  |                |                  | P    | 543.299770 | 272.153523      | 526.273221     | 263.640249       | 525.289205     | 263.148241       | 4 |
| 7 | 750.385474 | 375.696375      |                |                  | 732.374909     | 366.691093       | D    | 446.247006 | 223.627141      | 429.220457     | 215.113866       | 428.236441     | 214.621858       | 3 |
| 8 | 906.486585 | 453.746931      | 889.460036     | 445.233656       | 888.476020     | 444.741648       | R    | 331.220063 | 166.113669      | 314.193514     | 157.600395       |                |                  | 2 |
| 9 |            |                 |                |                  |                |                  | R    | 175.118952 | 88.063114       | 158.092403     | 79.549839        |                |                  | 1 |

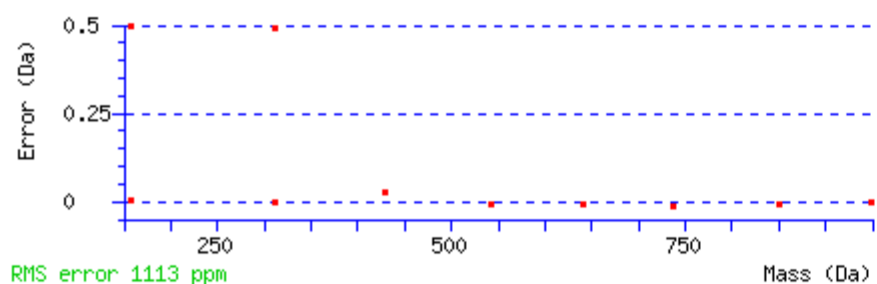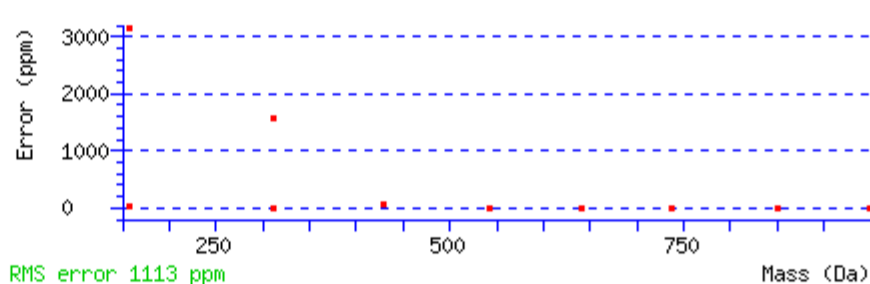

NCBI BLAST search of [MVLPPDRR](#)

(Parameters: blastp, nr protein database, expect=20000, no filter, PAM30)

Other BLAST [web gateways](#)

**All matches to this query**

| Score | Mr(calc):   | Delta     | Sequence                   |
|-------|-------------|-----------|----------------------------|
| 57.7  | 1079.579758 | 0.006550  | <a href="#">MVLPPDVGPR</a> |
| 45.1  | 1079.590973 | -0.004665 | <a href="#">MVLPPDRR</a>   |

# MASCOT Search Results

## Peptide View

MS/MS Fragmentation of **IENGPGEIPVDFSK**

Found in **TMM19\_HUMAN**, Transmembrane protein 19 OS=Homo sapiens GN=TMEM19 PE=2 SV=1

Match to Query 838337: 1500.744468 from(751.379510,2+) rtinseconds(2567) index(605688)

Title: Locus:1.1.1.1303.46

Data file C:\Program Files (x86)\Matrix Science\Mascot Daemon\mgf3 TFD - Epitel - R2\mascot\_daemon\_merge.mgf

Click mouse within plot area to zoom in by factor of two about that point

Or, Plot from  to  Da

Label all possible matches  Label matches used for scoring

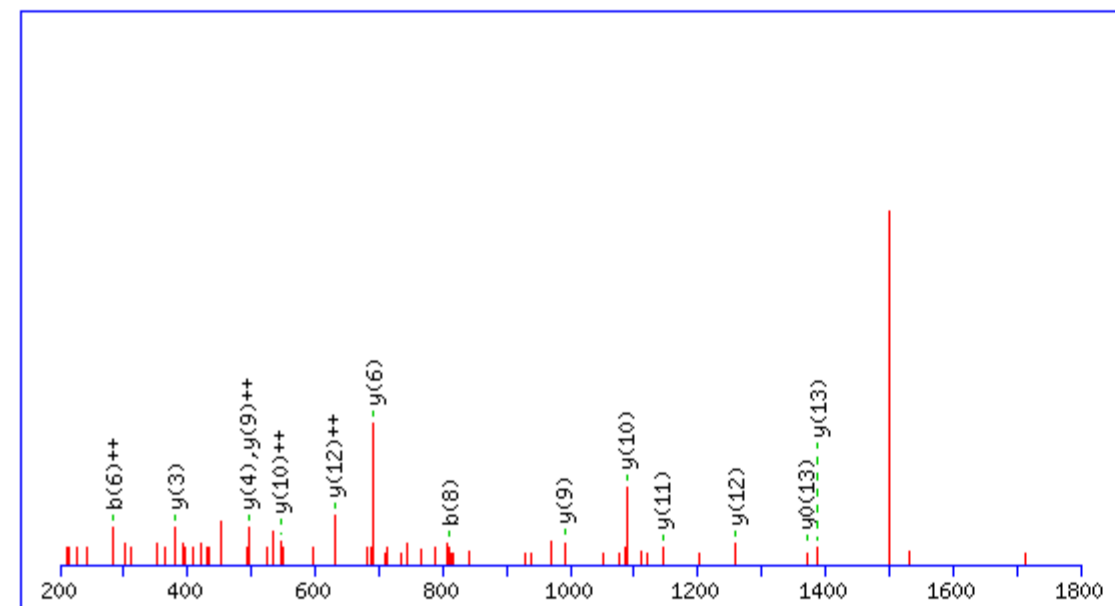

Monoisotopic mass of neutral peptide Mr(calc): 1500.746017

Fixed modifications: Carbamidomethyl (C) (apply to specified residues or termini only)

Ions Score: 49 Expect: 8e-005

Matches : 14/148 fragment ions using 23 most intense peaks [\(help\)](#)

| #  | b                 | b <sup>++</sup>   | b <sup>*</sup> | b <sup>*++</sup> | b <sup>0</sup> | b <sup>0++</sup> | Seq. | y                  | y <sup>++</sup>   | y <sup>*</sup> | y <sup>*++</sup> | y <sup>0</sup>     | y <sup>0++</sup> | #  |
|----|-------------------|-------------------|----------------|------------------|----------------|------------------|------|--------------------|-------------------|----------------|------------------|--------------------|------------------|----|
| 1  | 114.091340        | 57.549308         |                |                  |                |                  | I    |                    |                   |                |                  |                    |                  | 14 |
| 2  | 243.133933        | 122.070605        |                |                  | 225.123368     | 113.065322       | E    | <b>1388.669236</b> | 694.838256        | 1371.642687    | 686.324982       | <b>1370.658671</b> | 685.832974       | 13 |
| 3  | 357.176860        | 179.092068        | 340.150311     | 170.578794       | 339.166295     | 170.086786       | N    | <b>1259.626643</b> | <b>630.316960</b> | 1242.600094    | 621.803685       | 1241.616078        | 621.311677       | 12 |
| 4  | 414.198324        | 207.602800        | 397.171775     | 199.089526       | 396.187759     | 198.597518       | G    | <b>1145.583716</b> | 573.295496        | 1128.557167    | 564.782222       | 1127.573151        | 564.290214       | 11 |
| 5  | 511.251088        | 256.129182        | 494.224539     | 247.615908       | 493.240523     | 247.123900       | P    | <b>1088.562252</b> | <b>544.784764</b> | 1071.535703    | 536.271490       | 1070.551687        | 535.779482       | 10 |
| 6  | 568.272552        | <b>284.639914</b> | 551.246003     | 276.126640       | 550.261987     | 275.634632       | G    | <b>991.509488</b>  | <b>496.258382</b> | 974.482939     | 487.745108       | 973.498923         | 487.253100       | 9  |
| 7  | 697.315145        | 349.161211        | 680.288596     | 340.647936       | 679.304580     | 340.155928       | E    | 934.488024         | 467.747650        | 917.461475     | 459.234376       | 916.477459         | 458.742368       | 8  |
| 8  | <b>810.399209</b> | 405.703243        | 793.372660     | 397.189968       | 792.388644     | 396.697960       | I    | 805.445431         | 403.226354        | 788.418882     | 394.713079       | 787.434866         | 394.221071       | 7  |
| 9  | 907.451973        | 454.229625        | 890.425424     | 445.716350       | 889.441408     | 445.224342       | P    | <b>692.361367</b>  | 346.684322        | 675.334818     | 338.171047       | 674.350802         | 337.679039       | 6  |
| 10 | 1006.520387       | 503.763832        | 989.493838     | 495.250557       | 988.509822     | 494.758549       | V    | 595.308603         | 298.157940        | 578.282054     | 289.644665       | 577.298038         | 289.152657       | 5  |
| 11 | 1121.547330       | 561.277303        | 1104.520781    | 552.764029       | 1103.536765    | 552.272021       | D    | <b>496.240189</b>  | 248.623733        | 479.213640     | 240.110458       | 478.229624         | 239.618450       | 4  |
| 12 | 1268.615744       | 634.811510        | 1251.589195    | 626.298236       | 1250.605179    | 625.806228       | F    | <b>381.213246</b>  | 191.110261        | 364.186697     | 182.596987       | 363.202681         | 182.104979       | 3  |
| 13 | 1355.647772       | 678.327524        | 1338.621223    | 669.814250       | 1337.637207    | 669.322242       | S    | 234.144832         | 117.576054        | 217.118283     | 109.062780       | 216.134267         | 108.570772       | 2  |
| 14 |                   |                   |                |                  |                |                  | K    | 147.112804         | 74.060040         | 130.086255     | 65.546765        |                    |                  | 1  |

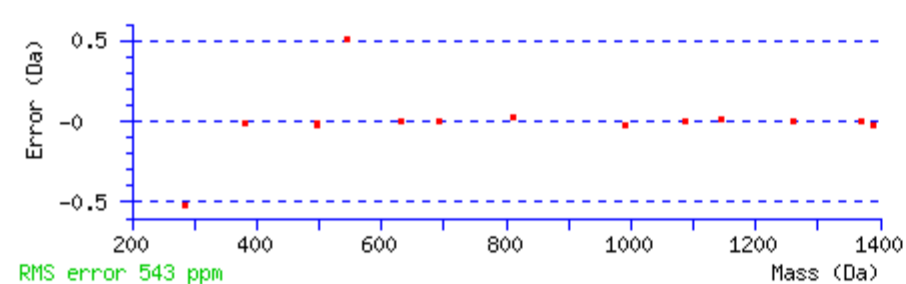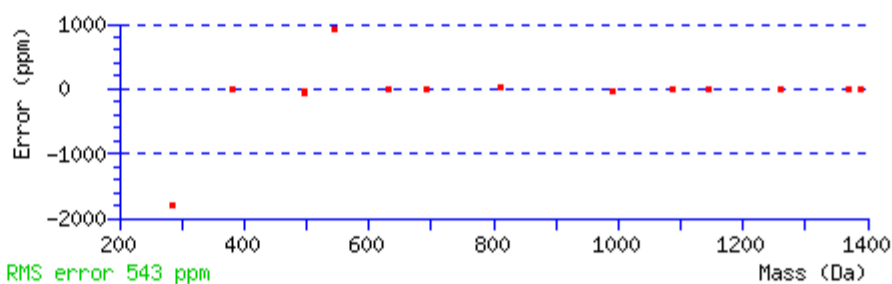

NCBI BLAST search of [IENGPGEIPVDFSK](#)

(Parameters: blastp, nr protein database, expect=20000, no filter, PAM30)

Other BLAST [web gateways](#)

## All matches to this query

| Score | Mr(calc):   | Delta     | Sequence                         |
|-------|-------------|-----------|----------------------------------|
| 49.1  | 1500.746017 | -0.001549 | <a href="#">IENGPGEIPVDFSK</a>   |
| 5.2   | 1500.749390 | -0.004922 | <a href="#">GEPGSIIMSSSLPGPK</a> |
| 4.9   | 1500.732101 | 0.012367  | <a href="#">LPGNHSTSQEIFR</a>    |
| 2.2   | 1500.746033 | -0.001565 | <a href="#">EPGPPGTPFATAISK</a>  |
| 0.3   | 1500.749390 | -0.004922 | <a href="#">GEPGSIIMSSSLPGPK</a> |

# MASCOT SEARCH RESULTS

## Peptide View

MS/MS Fragmentation of **SLLVNPVLFPNR**

Found in **TMM70\_HUMAN**, Transmembrane protein 70, mitochondrial OS=Homo sapiens GN=TMEM70 PE=1 SV=2

Match to Query 40016: 1367.793488 from(684.904020,2+) rtinseconds(3347) index(46323)

Title: Locus:1.1.1.2425.27

Data file 2011-11-12 - TFD - EP 6-6.mgf

Click mouse within plot area to zoom in by factor of two about that point

Or, Plot from  to  Da

Label all possible matches  Label matches used for scoring

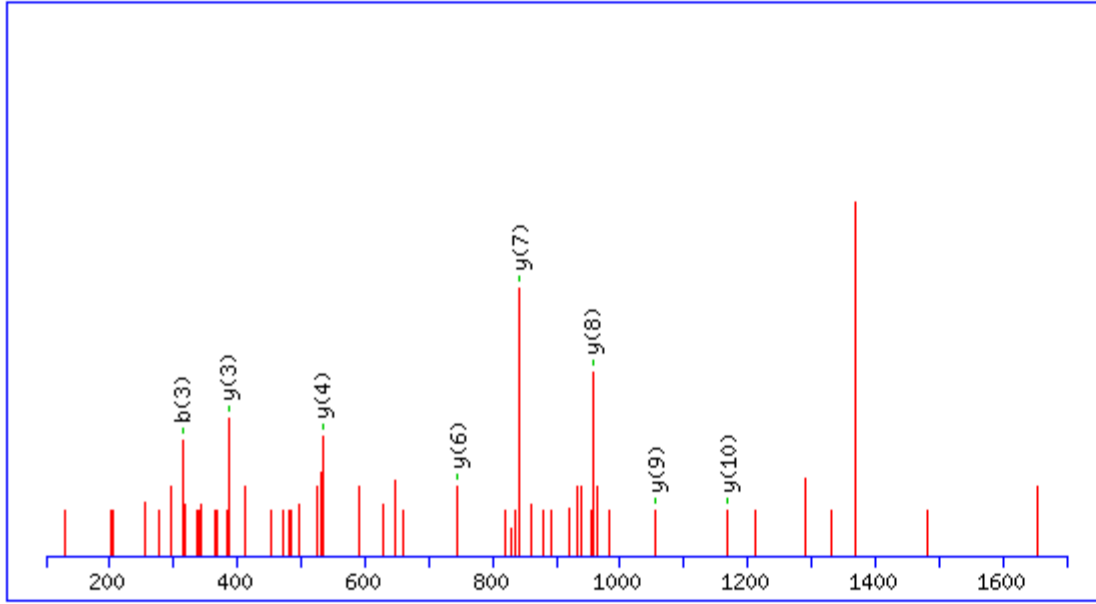

Monoisotopic mass of neutral peptide  $M_r(\text{calc})$ : 1367.792511

Fixed modifications: Propionamide (C) (apply to specified residues or termini only)

Ions Score: 46 Expect: 0.00011

Matches : 8/102 fragment ions using 13 most intense peaks [\(help\)](#)

| #  | b                 | b <sup>++</sup> | b <sup>*</sup> | b <sup>*++</sup> | b <sup>0</sup> | b <sup>0++</sup> | Seq. | y                  | y <sup>++</sup> | y <sup>*</sup> | y <sup>*++</sup> | #  |
|----|-------------------|-----------------|----------------|------------------|----------------|------------------|------|--------------------|-----------------|----------------|------------------|----|
| 1  | 88.039304         | 44.523290       |                |                  | 70.028739      | 35.518008        | S    |                    |                 |                |                  | 12 |
| 2  | 201.123368        | 101.065322      |                |                  | 183.112803     | 92.060039        | L    | 1281.767768        | 641.387522      | 1264.741219    | 632.874248       | 11 |
| 3  | <b>314.207432</b> | 157.607354      |                |                  | 296.196867     | 148.602071       | L    | <b>1168.683704</b> | 584.845490      | 1151.657155    | 576.332216       | 10 |
| 4  | 413.275846        | 207.141561      |                |                  | 395.265281     | 198.136279       | V    | <b>1055.599640</b> | 528.303458      | 1038.573091    | 519.790184       | 9  |
| 5  | 527.318773        | 264.163025      | 510.292224     | 255.649750       | 509.308208     | 255.157742       | N    | <b>956.531226</b>  | 478.769251      | 939.504677     | 470.255977       | 8  |
| 6  | 624.371537        | 312.689407      | 607.344988     | 304.176132       | 606.360972     | 303.684124       | P    | <b>842.488299</b>  | 421.747788      | 825.461750     | 413.234513       | 7  |
| 7  | 723.439951        | 362.223614      | 706.413402     | 353.710339       | 705.429386     | 353.218331       | V    | <b>745.435535</b>  | 373.221406      | 728.408986     | 364.708131       | 6  |
| 8  | 836.524015        | 418.765646      | 819.497466     | 410.252371       | 818.513450     | 409.760363       | L    | 646.367121         | 323.687199      | 629.340572     | 315.173924       | 5  |
| 9  | 983.592429        | 492.299853      | 966.565880     | 483.786578       | 965.581864     | 483.294570       | F    | <b>533.283057</b>  | 267.145167      | 516.256508     | 258.631892       | 4  |
| 10 | 1080.645193       | 540.826235      | 1063.618644    | 532.312960       | 1062.634628    | 531.820952       | P    | <b>386.214643</b>  | 193.610959      | 369.188094     | 185.097685       | 3  |
| 11 | 1194.688120       | 597.847698      | 1177.661571    | 589.334424       | 1176.677555    | 588.842416       | N    | 289.161879         | 145.084577      | 272.135330     | 136.571303       | 2  |
| 12 |                   |                 |                |                  |                |                  | R    | 175.118952         | 88.063114       | 158.092403     | 79.549839        | 1  |

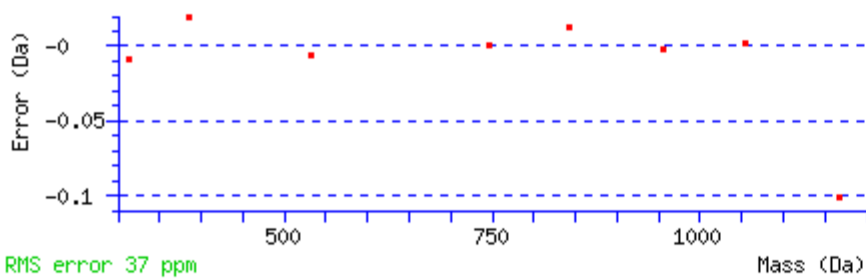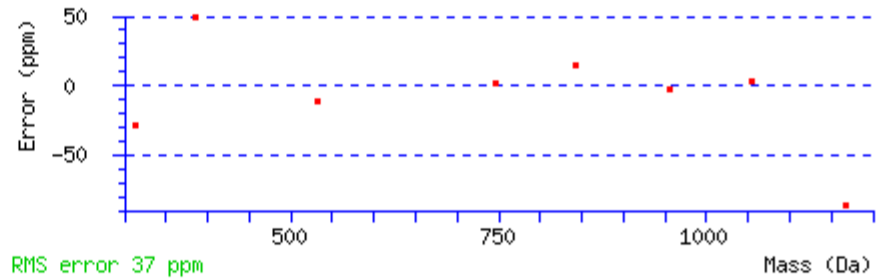

NCBI BLAST search of [SLLVNPVLFPNR](#)

(Parameters: blastp, nr protein database, expect=20000, no filter, PAM30)

Other BLAST [web gateways](#)

All matches to this query

| Score | $M_r(\text{calc})$ : | Delta    | Sequence                     |
|-------|----------------------|----------|------------------------------|
| 45.5  | 1367.792511          | 0.000977 | <a href="#">SLLVNPVLFPNR</a> |

Mascot: <http://www.matrixscience.com/>

# MASCOT SCIENCE Mascot Search Results

## Peptide View

### MS/MS Fragmentation of EGPPFISEAAVR

Found in **TMM93\_HUMAN**, Transmembrane protein 93 OS=Homo sapiens GN=TMEM93 PE=1 SV=1

Match to Query 30451: 1271.656248 from(636.835400,2+) rtinseconds(2549) index(27432)

Title: Locus:1.1.1.2328.39

Data file 2011-11-14 - TFD - EP 8-7.mgf

Click mouse within plot area to zoom in by factor of two about that point

Or, Plot from  to  Da

Label all possible matches  Label matches used for scoring

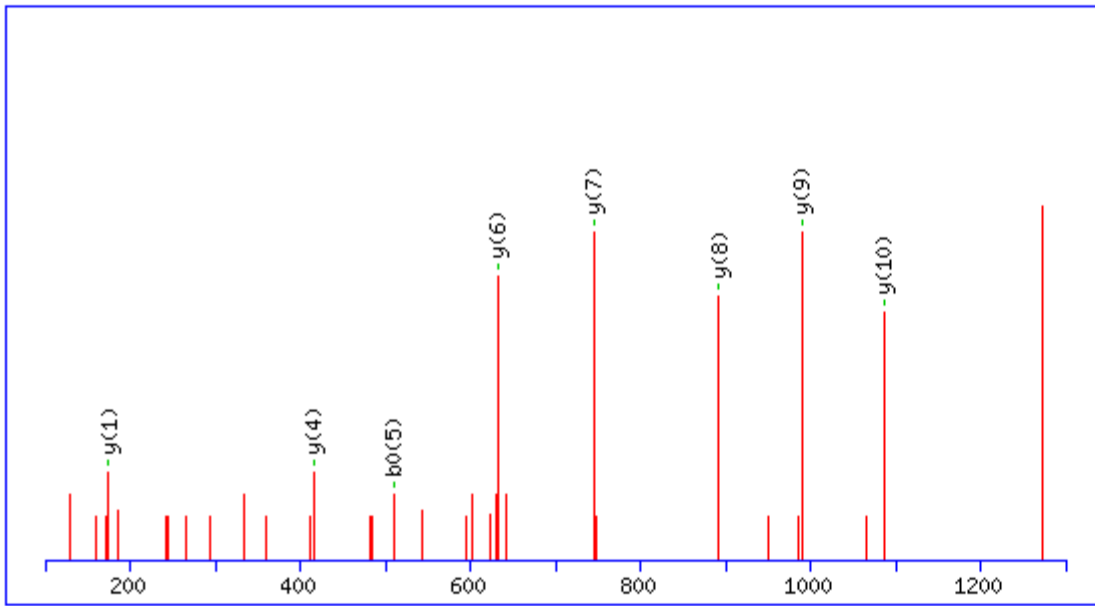

Monoisotopic mass of neutral peptide Mr(calc): 1271.650986

Fixed modifications: Propionamide (C) (apply to specified residues or termini only)

Ions Score: 59 Expect: 4.2e-006

Matches : 8/102 fragment ions using 10 most intense peaks [\(help\)](#)

| #  | b           | b <sup>++</sup> | b <sup>0</sup>    | b <sup>0++</sup> | Seq. | y                  | y <sup>++</sup> | y <sup>*</sup> | y <sup>*++</sup> | y <sup>0</sup> | y <sup>0++</sup> | #  |
|----|-------------|-----------------|-------------------|------------------|------|--------------------|-----------------|----------------|------------------|----------------|------------------|----|
| 1  | 130.049869  | 65.528572       | 112.039304        | 56.523290        | E    |                    |                 |                |                  |                |                  | 12 |
| 2  | 187.071333  | 94.039305       | 169.060768        | 85.034022        | G    | 1143.615685        | 572.311481      | 1126.589136    | 563.798206       | 1125.605120    | 563.306198       | 11 |
| 3  | 284.124097  | 142.565687      | 266.113532        | 133.560404       | P    | <b>1086.594221</b> | 543.800748      | 1069.567672    | 535.287474       | 1068.583656    | 534.795466       | 10 |
| 4  | 381.176861  | 191.092068      | 363.166296        | 182.086786       | P    | <b>989.541457</b>  | 495.274366      | 972.514908     | 486.761092       | 971.530892     | 486.269084       | 9  |
| 5  | 528.245275  | 264.626276      | <b>510.234710</b> | 255.620993       | F    | <b>892.488693</b>  | 446.747984      | 875.462144     | 438.234710       | 874.478128     | 437.742702       | 8  |
| 6  | 641.329339  | 321.168308      | 623.318774        | 312.163025       | I    | <b>745.420279</b>  | 373.213777      | 728.393730     | 364.700503       | 727.409714     | 364.208495       | 7  |
| 7  | 728.361367  | 364.684322      | 710.350802        | 355.679039       | S    | <b>632.336215</b>  | 316.671745      | 615.309666     | 308.158471       | 614.325650     | 307.666463       | 6  |
| 8  | 857.403960  | 429.205618      | 839.393395        | 420.200335       | E    | 545.304187         | 273.155732      | 528.277638     | 264.642457       | 527.293622     | 264.150449       | 5  |
| 9  | 928.441074  | 464.724175      | 910.430509        | 455.718892       | A    | <b>416.261594</b>  | 208.634435      | 399.235045     | 200.121160       |                |                  | 4  |
| 10 | 999.478188  | 500.242732      | 981.467623        | 491.237449       | A    | 345.224480         | 173.115878      | 328.197931     | 164.602603       |                |                  | 3  |
| 11 | 1098.546602 | 549.776939      | 1080.536037       | 540.771656       | V    | 274.187366         | 137.597321      | 257.160817     | 129.084046       |                |                  | 2  |
| 12 |             |                 |                   |                  | R    | <b>175.118952</b>  | 88.063114       | 158.092403     | 79.549839        |                |                  | 1  |

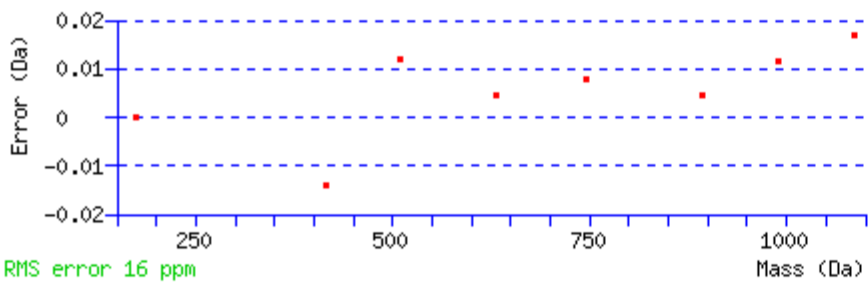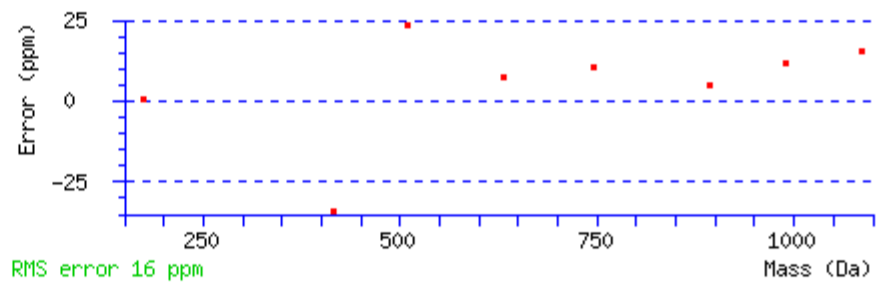

### NCBI BLAST search of EGPPFISEAAVR

(Parameters: blastp, nr protein database, expect=20000, no filter, PAM30)

Other BLAST [web gateways](#)

### All matches to this query

| Score | Mr(calc):   | Delta    | Sequence                     |
|-------|-------------|----------|------------------------------|
| 58.8  | 1271.650986 | 0.005262 | <a href="#">EGPPFISEAAVR</a> |
| 1.4   | 1271.651001 | 0.005247 | <a href="#">WALLTDPGDIR</a>  |
| 0.6   | 1271.651001 | 0.005247 | <a href="#">IavgTEWDIPR</a>  |

Mascot: <http://www.matrixscience.com/>

# MASCOT SCIENCE Mascot Search Results

## Peptide View

MS/MS Fragmentation of **AADDTWEPFASGK**

Found in **TTHY\_HUMAN**, Transthyretin OS=Homo sapiens GN=TTR PE=1 SV=1

Match to Query 35100: 1393.612828 from(697.813690,2+) rtinseconds(2660) index(27736)

Title: Locus:1.1.1.2343.30

Data file 2011-11-12 - TFD - EP 5-7.mgf

Click mouse within plot area to zoom in by factor of two about that point

Or, Plot from  to  Da

Label all possible matches  Label matches used for scoring

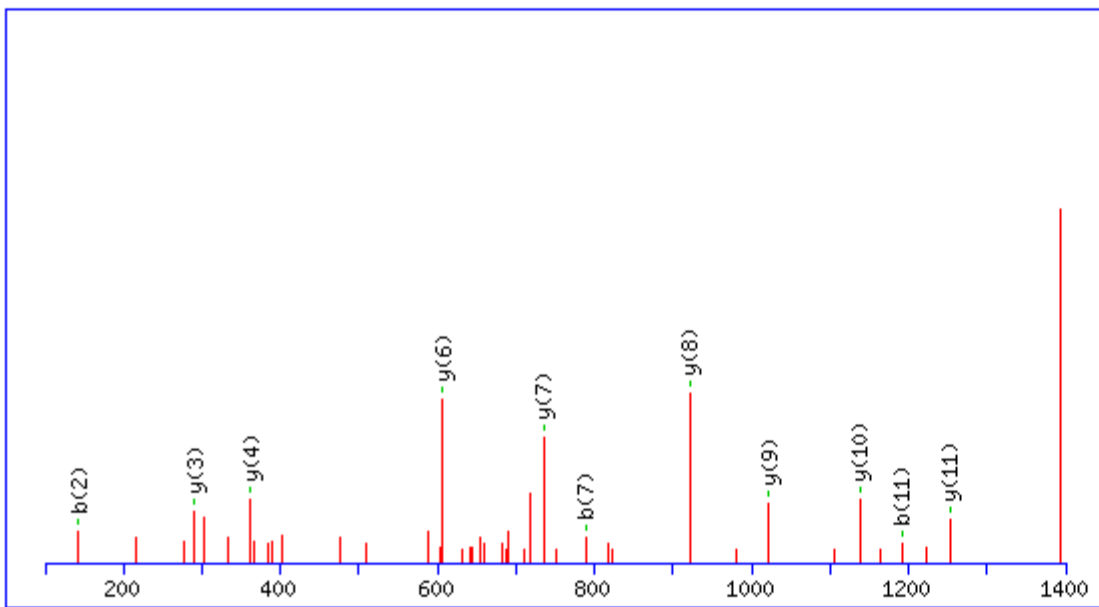

Monoisotopic mass of neutral peptide Mr(calc): 1393.615005

Fixed modifications: Propionamide (C) (apply to specified residues or termini only)

Ions Score: 80 Expect: 4.7e-008

Matches : 11/112 fragment ions using 12 most intense peaks [\(help\)](#)

| #  | b                  | b <sup>++</sup> | b <sup>0</sup> | b <sup>0++</sup> | Seq. | y                  | y <sup>++</sup> | y <sup>*</sup> | y <sup>*++</sup> | y <sup>0</sup> | y <sup>0++</sup> | #  |
|----|--------------------|-----------------|----------------|------------------|------|--------------------|-----------------|----------------|------------------|----------------|------------------|----|
| 1  | 72.044390          | 36.525833       |                |                  | A    |                    |                 |                |                  |                |                  | 13 |
| 2  | <b>143.081504</b>  | 72.044390       |                |                  | A    | 1323.585173        | 662.296225      | 1306.558624    | 653.782950       | 1305.574608    | 653.290942       | 12 |
| 3  | 258.108447         | 129.557862      | 240.097882     | 120.552579       | D    | <b>1252.548059</b> | 626.777668      | 1235.521510    | 618.264393       | 1234.537494    | 617.772385       | 11 |
| 4  | 373.135390         | 187.071333      | 355.124825     | 178.066051       | D    | <b>1137.521116</b> | 569.264196      | 1120.494567    | 560.750922       | 1119.510551    | 560.258914       | 10 |
| 5  | 474.183069         | 237.595173      | 456.172504     | 228.589890       | T    | <b>1022.494173</b> | 511.750725      | 1005.467624    | 503.237450       | 1004.483608    | 502.745442       | 9  |
| 6  | 660.262382         | 330.634829      | 642.251817     | 321.629547       | W    | <b>921.446494</b>  | 461.226885      | 904.419945     | 452.713611       | 903.435929     | 452.221603       | 8  |
| 7  | <b>789.304975</b>  | 395.156126      | 771.294410     | 386.150843       | E    | <b>735.367181</b>  | 368.187229      | 718.340632     | 359.673954       | 717.356616     | 359.181946       | 7  |
| 8  | 886.357739         | 443.682508      | 868.347174     | 434.677225       | P    | <b>606.324588</b>  | 303.665932      | 589.298039     | 295.152658       | 588.314023     | 294.660650       | 6  |
| 9  | 1033.426153        | 517.216715      | 1015.415588    | 508.211432       | F    | 509.271824         | 255.139550      | 492.245275     | 246.626275       | 491.261259     | 246.134267       | 5  |
| 10 | 1104.463267        | 552.735272      | 1086.452702    | 543.729989       | A    | <b>362.203410</b>  | 181.605343      | 345.176861     | 173.092068       | 344.192845     | 172.600060       | 4  |
| 11 | <b>1191.495295</b> | 596.251286      | 1173.484730    | 587.246003       | S    | <b>291.166296</b>  | 146.086786      | 274.139747     | 137.573512       | 273.155731     | 137.081504       | 3  |
| 12 | 1248.516759        | 624.762018      | 1230.506194    | 615.756735       | G    | 204.134268         | 102.570772      | 187.107719     | 94.057497        |                |                  | 2  |
| 13 |                    |                 |                |                  | K    | 147.112804         | 74.060040       | 130.086255     | 65.546765        |                |                  | 1  |

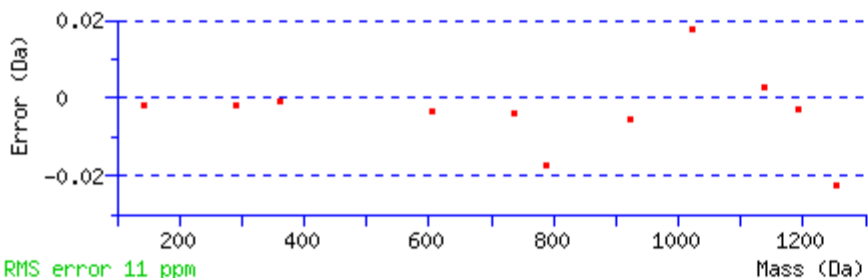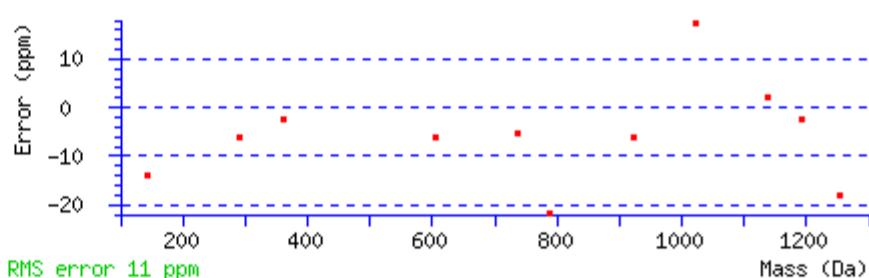

NCBI BLAST search of [AADDTWEPFASGK](#)

(Parameters: blastp, nr protein database, expect=20000, no filter, PAM30)

Other BLAST [web gateways](#)

All matches to this query

| Score | Mr(calc):   | Delta     | Sequence                      |
|-------|-------------|-----------|-------------------------------|
| 79.7  | 1393.615005 | -0.002177 | <a href="#">AADDTWEPFASGK</a> |

Mascot: <http://www.matrixscience.com/>

# **MASCOT** Mascot Search Results

## Peptide View

MS/MS Fragmentation of **EQSVSKIR**

Found in **TCHL1\_HUMAN**, Trichohyalin-like protein 1 OS=Homo sapiens GN=TCHL1 PE=2 SV=1

Match to Query 11663: 945.526148 from(473.770350,2+) rtinseconds(1490) index(7772)

Title: Locus:1.1.1.1974.17

Data file 2011-11-10 - TFD - EP 3-7.mgf

Click mouse within plot area to zoom in by factor of two about that point

Or, Plot from  to  Da

Label all possible matches  Label matches used for scoring

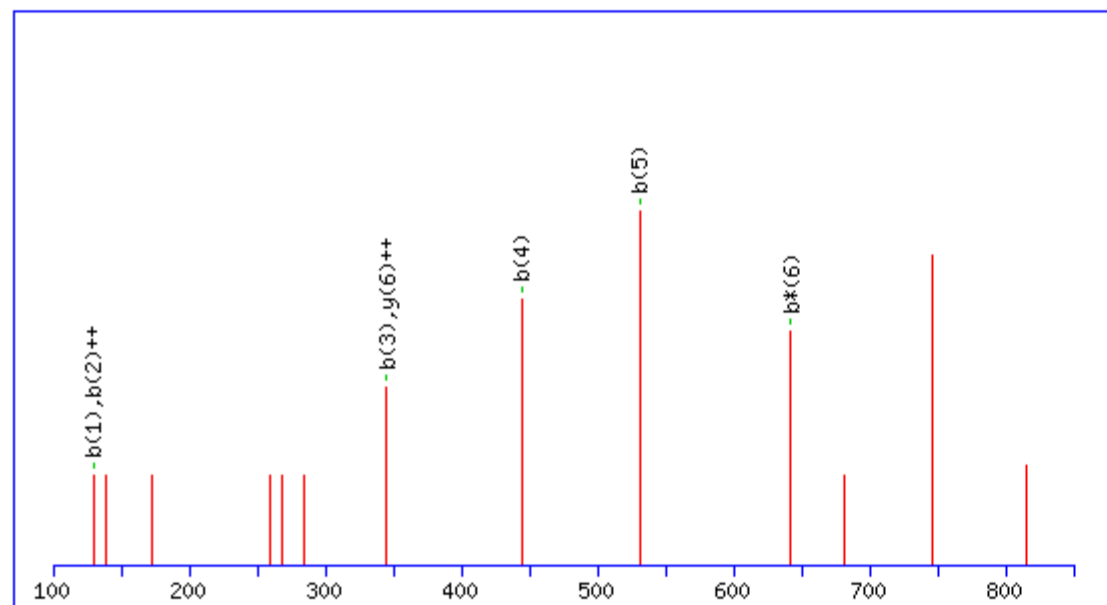

Monoisotopic mass of neutral peptide Mr(calc): 945.524323

Fixed modifications: Propionamide (C) (apply to specified residues or termini only)

Ions Score: 31 Expect: 0.006

Matches : 7/76 fragment ions using 7 most intense peaks [\(help\)](#)

| # | b                 | b <sup>++</sup>   | b <sup>*</sup>    | b <sup>*++</sup> | b <sup>0</sup> | b <sup>0++</sup> | Seq.     | y          | y <sup>++</sup>   | y <sup>*</sup> | y <sup>*++</sup> | y <sup>0</sup> | y <sup>0++</sup> | #        |
|---|-------------------|-------------------|-------------------|------------------|----------------|------------------|----------|------------|-------------------|----------------|------------------|----------------|------------------|----------|
| 1 | <b>130.049869</b> | 65.528572         |                   |                  | 112.039304     | 56.523290        | <b>E</b> |            |                   |                |                  |                |                  | <b>8</b> |
| 2 | 258.108447        | <b>129.557862</b> | 241.081898        | 121.044587       | 240.097882     | 120.552579       | <b>Q</b> | 817.489027 | 409.248152        | 800.462478     | 400.734877       | 799.478462     | 400.242869       | <b>7</b> |
| 3 | <b>345.140475</b> | 173.073875        | 328.113926        | 164.560601       | 327.129910     | 164.068593       | <b>S</b> | 689.430449 | <b>345.218863</b> | 672.403900     | 336.705588       | 671.419884     | 336.213580       | <b>6</b> |
| 4 | <b>444.208889</b> | 222.608082        | 427.182340        | 214.094808       | 426.198324     | 213.602800       | <b>V</b> | 602.398421 | 301.702849        | 585.371872     | 293.189574       | 584.387856     | 292.697566       | <b>5</b> |
| 5 | <b>531.240917</b> | 266.124097        | 514.214368        | 257.610822       | 513.230352     | 257.118814       | <b>S</b> | 503.330007 | 252.168642        | 486.303458     | 243.655367       | 485.319442     | 243.163359       | <b>4</b> |
| 6 | 659.335880        | 330.171578        | <b>642.309331</b> | 321.658304       | 641.325315     | 321.166296       | <b>K</b> | 416.297979 | 208.652628        | 399.271430     | 200.139353       |                |                  | <b>3</b> |
| 7 | 772.419944        | 386.713610        | 755.393395        | 378.200336       | 754.409379     | 377.708328       | <b>I</b> | 288.203016 | 144.605146        | 271.176467     | 136.091872       |                |                  | <b>2</b> |
| 8 |                   |                   |                   |                  |                |                  | <b>R</b> | 175.118952 | 88.063114         | 158.092403     | 79.549840        |                |                  | <b>1</b> |

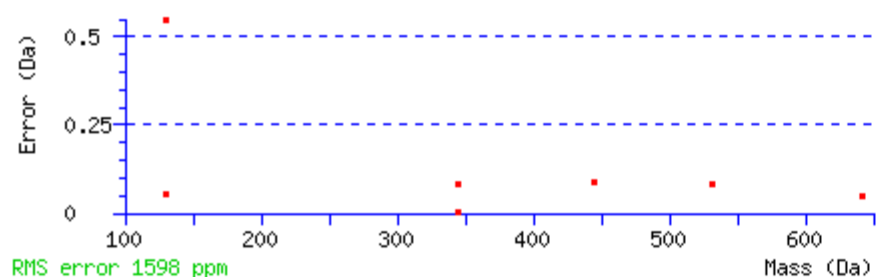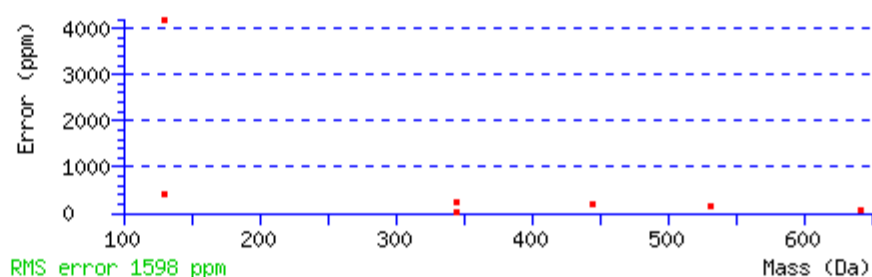

NCBI BLAST search of [EQSVSKIR](#)

(Parameters: blastp, nr protein database, expect=20000, no filter, PAM30)

Other BLAST [web gateways](#)

## All matches to this query

| Score | Mr(calc):  | Delta     | Sequence                  |
|-------|------------|-----------|---------------------------|
| 30.7  | 945.524323 | 0.001825  | <a href="#">EQSVSKIR</a>  |
| 6.6   | 945.520493 | 0.005655  | <a href="#">LSPPMLLK</a>  |
| 3.2   | 945.524323 | 0.001825  | <a href="#">SEQSVKLR</a>  |
| 2.0   | 945.524323 | 0.001825  | <a href="#">ISQSTALAR</a> |
| 1.6   | 945.524323 | 0.001825  | <a href="#">SQLDSLKR</a>  |
| 1.0   | 945.528366 | -0.002218 | <a href="#">EPIFVGLR</a>  |
| 0.2   | 945.524323 | 0.001825  | <a href="#">ETATKPKR</a>  |
| 0.2   | 945.524353 | 0.001795  | <a href="#">QTDVVRTK</a>  |

**Peptide View**

MS/MS Fragmentation of **AVAEMQFGELLAAVR**  
 Found in **TRIM16\_HUMAN**, Tripartite motif-containing protein 16 OS=Homo sapiens GN=TRIM16 PE=1 SV=3

Match to Query 53048: 1619.837588 from(810.926070,2+) rtinseconds(3654) index(52988)  
 Title: Locus:1.1.1.2807.44  
 Data file 2011-11-14 - TFD - EP 8-2.mgf

Click mouse within plot area to zoom in by factor of two about that point  
 Or, Plot from  to  Da   
 Label all possible matches  Label matches used for scoring

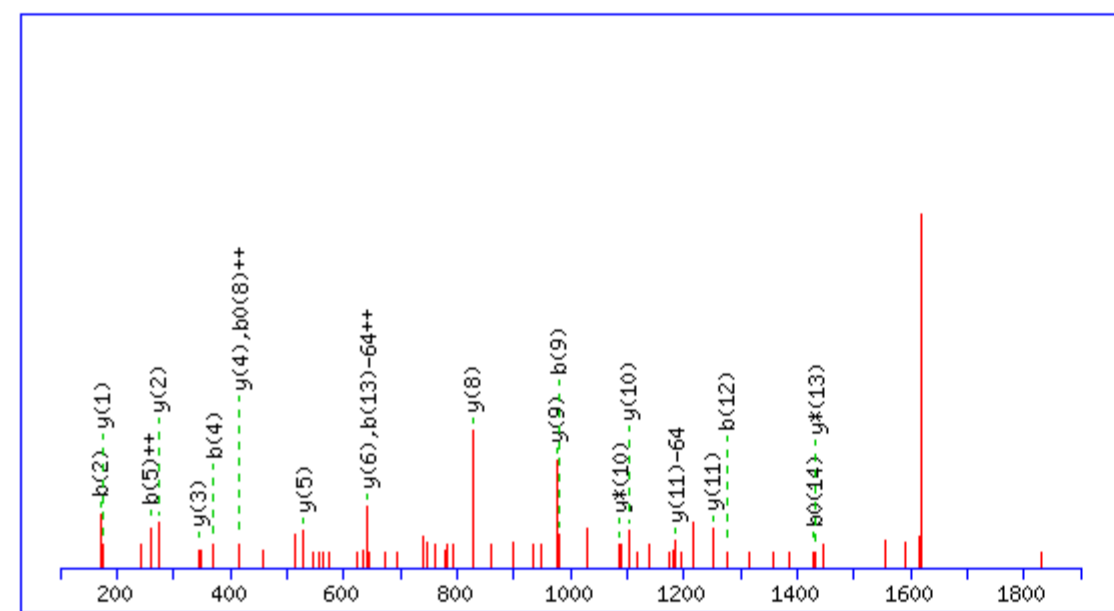

Monoisotopic mass of neutral peptide  $M_r(\text{calc})$ : 1619.834106  
 Fixed modifications: Propionamide (C) (apply to specified residues or termini only)  
 Variable modifications:  
 M5 : Oxidation (M), with neutral losses 0.000000 (shown in table), 63.998285  
 Ions Score: 55 Expect: 3e-005  
 Matches : 21/222 fragment ions using 42 most intense peaks ([help](#))

| #  | b                  | b <sup>++</sup>   | b <sup>*</sup> | b <sup>*++</sup> | b <sup>0</sup>     | b <sup>0++</sup>  | Seq. | y                  | y <sup>++</sup> | y <sup>*</sup>     | y <sup>*++</sup> | y <sup>0</sup> | y <sup>0++</sup> | #  |
|----|--------------------|-------------------|----------------|------------------|--------------------|-------------------|------|--------------------|-----------------|--------------------|------------------|----------------|------------------|----|
| 1  | 72.044390          | 36.525833         |                |                  |                    |                   | A    |                    |                 |                    |                  |                |                  | 15 |
| 2  | <b>171.112804</b>  | 86.060040         |                |                  |                    |                   | V    | 1549.804292        | 775.405784      | 1532.777743        | 766.892510       | 1531.793727    | 766.400502       | 14 |
| 3  | 242.149918         | 121.578597        |                |                  |                    |                   | A    | 1450.735878        | 725.871577      | <b>1433.709329</b> | 717.358303       | 1432.725313    | 716.866294       | 13 |
| 4  | <b>371.192511</b>  | 186.099894        |                |                  | 353.181946         | 177.094611        | E    | 1379.698764        | 690.353020      | 1362.672215        | 681.839746       | 1361.688199    | 681.347737       | 12 |
| 5  | 518.227911         | <b>259.617594</b> |                |                  | 500.217346         | 250.612311        | M    | <b>1250.656171</b> | 625.831723      | 1233.629622        | 617.318449       | 1232.645606    | 616.826441       | 11 |
| 6  | 646.286489         | 323.646883        | 629.259940     | 315.133608       | 628.275924         | 314.641600        | Q    | <b>1103.620771</b> | 552.314024      | <b>1086.594222</b> | 543.800749       | 1085.610206    | 543.308741       | 10 |
| 7  | 793.354903         | 397.181090        | 776.328354     | 388.667815       | 775.344338         | 388.175807        | F    | <b>975.562193</b>  | 488.284735      | 958.535644         | 479.771460       | 957.551628     | 479.279452       | 9  |
| 8  | 850.376367         | 425.691822        | 833.349818     | 417.178547       | 832.365802         | <b>416.686539</b> | G    | <b>828.493779</b>  | 414.750528      | 811.467230         | 406.237253       | 810.483214     | 405.745245       | 8  |
| 9  | <b>979.418960</b>  | 490.213118        | 962.392411     | 481.699844       | 961.408395         | 481.207836        | E    | 771.472315         | 386.239796      | 754.445766         | 377.726521       | 753.461750     | 377.234513       | 7  |
| 10 | 1092.503024        | 546.755150        | 1075.476475    | 538.241876       | 1074.492459        | 537.749868        | L    | <b>642.429722</b>  | 321.718499      | 625.403173         | 313.205224       |                |                  | 6  |
| 11 | 1205.587088        | 603.297182        | 1188.560539    | 594.783908       | 1187.576523        | 594.291900        | L    | <b>529.345658</b>  | 265.176467      | 512.319109         | 256.663192       |                |                  | 5  |
| 12 | <b>1276.624202</b> | 638.815739        | 1259.597653    | 630.302465       | 1258.613637        | 629.810456        | A    | <b>416.261594</b>  | 208.634435      | 399.235045         | 200.121160       |                |                  | 4  |
| 13 | 1347.661316        | 674.334296        | 1330.634767    | 665.821022       | 1329.650751        | 665.329013        | A    | <b>345.224480</b>  | 173.115878      | 328.197931         | 164.602603       |                |                  | 3  |
| 14 | 1446.729730        | 723.868503        | 1429.703181    | 715.355229       | <b>1428.719165</b> | 714.863221        | V    | <b>274.187366</b>  | 137.597321      | 257.160817         | 129.084047       |                |                  | 2  |
| 15 |                    |                   |                |                  |                    |                   | R    | <b>175.118952</b>  | 88.063114       | 158.092403         | 79.549839        |                |                  | 1  |

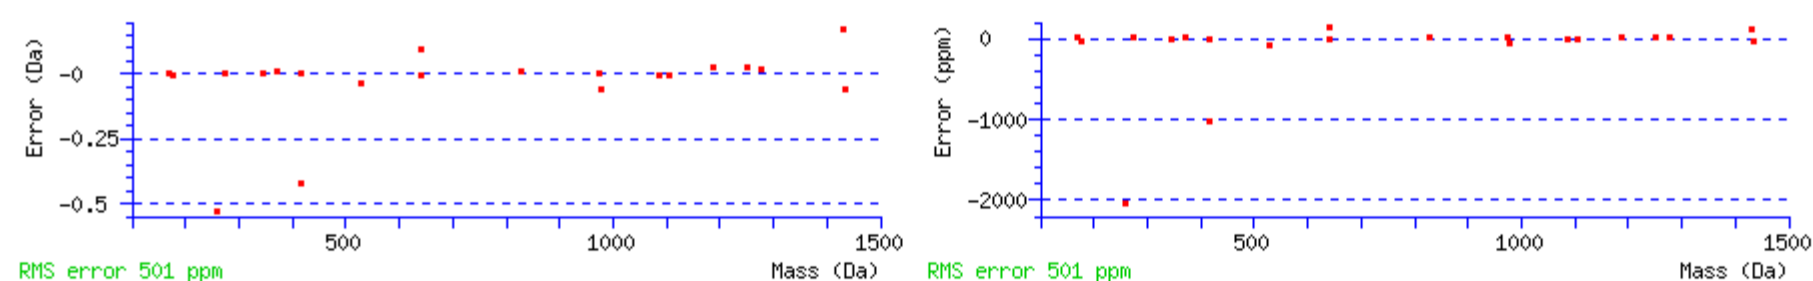

NCBI BLAST search of [AVAEMQFGELLAAVR](#)  
 (Parameters: blastp, nr protein database, expect=20000, no filter, PAM30)  
 Other BLAST [web gateways](#)

**All matches to this query**

| Score | $M_r(\text{calc})$ : | Delta     | Sequence                         |
|-------|----------------------|-----------|----------------------------------|
| 55.5  | 1619.834106          | 0.003482  | <a href="#">AVAEMQFGELLAAVR</a>  |
| 7.3   | 1619.837967          | -0.000379 | <a href="#">RPAGPGSPATSPASVR</a> |

# MASCOT SCIENCE Mascot Search Results

## Peptide View

MS/MS Fragmentation of **FSEPVYAAFWLSK**

Found in **TR16L\_HUMAN**, Tripartite motif-containing protein 16-like protein OS=Homo sapiens GN=TRIM16L PE=2 SV=3

Match to Query 48521: 1543.780948 from(772.897750,2+) rtinseconds(3893) index(57093)

Title: Locus:1.1.1.2961.35

Data file 2011-11-10 - TFD - EP 4-2.mgf

Click mouse within plot area to zoom in by factor of two about that point

Or, Plot from  to  Da

Label all possible matches  Label matches used for scoring

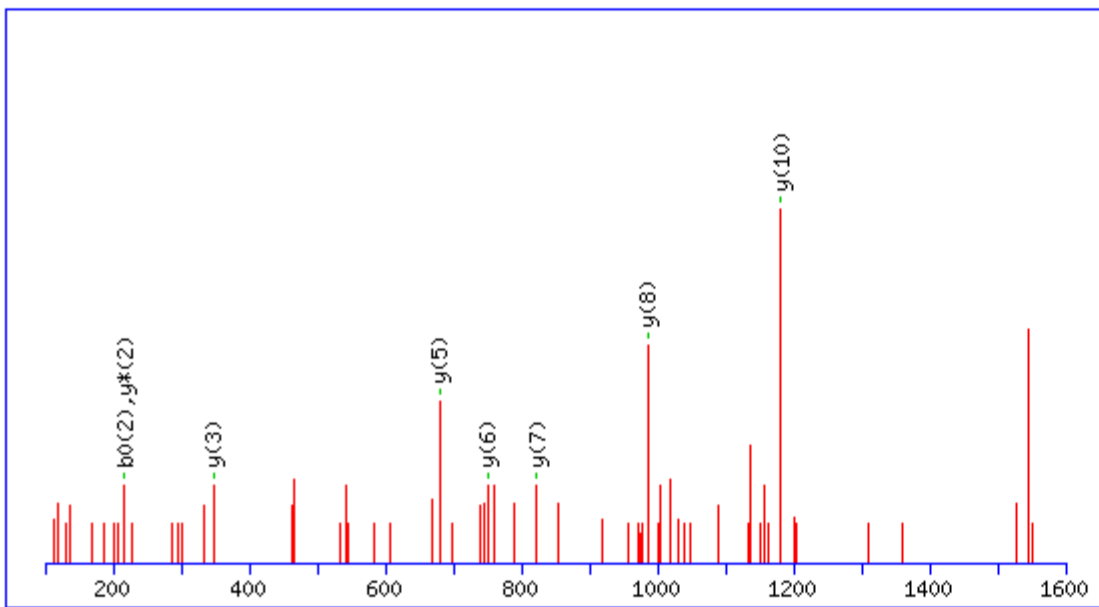

Monoisotopic mass of neutral peptide Mr(calc): 1543.771103

Fixed modifications: Propionamide (C) (apply to specified residues or termini only)

Ions Score: 35 Expect: 0.0048

Matches : 8/116 fragment ions using 14 most intense peaks [\(help\)](#)

| #  | b           | b <sup>++</sup> | b <sup>0</sup> | b <sup>0++</sup> | Seq. | y           | y <sup>++</sup> | y <sup>*</sup> | y <sup>*++</sup> | y <sup>0</sup> | y <sup>0++</sup> | #  |
|----|-------------|-----------------|----------------|------------------|------|-------------|-----------------|----------------|------------------|----------------|------------------|----|
| 1  | 148.075690  | 74.541483       |                |                  | F    |             |                 |                |                  |                |                  | 13 |
| 2  | 235.107718  | 118.057497      | 217.097153     | 109.052214       | S    | 1397.709979 | 699.358628      | 1380.683430    | 690.845353       | 1379.699414    | 690.353345       | 12 |
| 3  | 364.150311  | 182.578793      | 346.139746     | 173.573511       | E    | 1310.677951 | 655.842614      | 1293.651402    | 647.329339       | 1292.667386    | 646.837331       | 11 |
| 4  | 461.203075  | 231.105175      | 443.192510     | 222.099893       | P    | 1181.635358 | 591.321317      | 1164.608809    | 582.808043       | 1163.624793    | 582.316035       | 10 |
| 5  | 560.271489  | 280.639383      | 542.260924     | 271.634100       | V    | 1084.582594 | 542.794935      | 1067.556045    | 534.281661       | 1066.572029    | 533.789653       | 9  |
| 6  | 723.334818  | 362.171047      | 705.324253     | 353.165765       | Y    | 985.514180  | 493.260728      | 968.487631     | 484.747454       | 967.503615     | 484.255446       | 8  |
| 7  | 794.371932  | 397.689604      | 776.361367     | 388.684322       | A    | 822.450851  | 411.729064      | 805.424302     | 403.215789       | 804.440286     | 402.723781       | 7  |
| 8  | 865.409046  | 433.208161      | 847.398481     | 424.202879       | A    | 751.413737  | 376.210507      | 734.387188     | 367.697232       | 733.403172     | 367.205224       | 6  |
| 9  | 1012.477460 | 506.742368      | 994.466895     | 497.737085       | F    | 680.376623  | 340.691950      | 663.350074     | 332.178675       | 662.366058     | 331.686667       | 5  |
| 10 | 1198.556773 | 599.782025      | 1180.546208    | 590.776742       | W    | 533.308209  | 267.157743      | 516.281660     | 258.644468       | 515.297644     | 258.152460       | 4  |
| 11 | 1311.640837 | 656.324056      | 1293.630272    | 647.318774       | L    | 347.228896  | 174.118086      | 330.202347     | 165.604811       | 329.218331     | 165.112803       | 3  |
| 12 | 1398.672865 | 699.840071      | 1380.662300    | 690.834788       | S    | 234.144832  | 117.576054      | 217.118283     | 109.062780       | 216.134267     | 108.570772       | 2  |
| 13 |             |                 |                |                  | K    | 147.112804  | 74.060040       | 130.086255     | 65.546765        |                |                  | 1  |

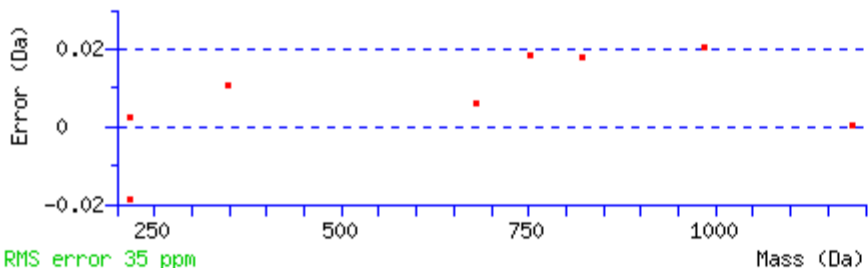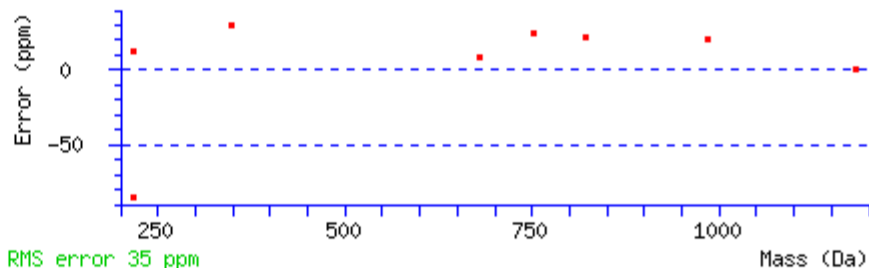

NCBI BLAST search of [FSEPVYAAFWLSK](#)

(Parameters: blastp, nr protein database, expect=20000, no filter, PAM30)

Other BLAST [web gateways](#)

All matches to this query

| Score | Mr(calc):   | Delta    | Sequence                                                                                                                      |
|-------|-------------|----------|-------------------------------------------------------------------------------------------------------------------------------|
| 35.1  | 1543.771103 | 0.009845 | <a href="#">FSEP<span style="color:blue">V</span>YAAF<span style="color:blue">W</span>L<span style="color:blue">S</span>K</a> |

Mascot: <http://www.matrixscience.com/>



# **MATRIX** SCIENCE Mascot Search Results

## Peptide View

MS/MS Fragmentation of **KPLELREM**

Found in **TRI75\_HUMAN**, Tripartite motif-containing protein 75 OS=Homo sapiens GN=TRIM75 PE=2 SV=2

Match to Query 324775: 1046.551548 from(524.283050,2+) rtinseconds(2051) index(837341)

Title: Locus:1.1.1.1327.24

Data file C:\Program Files (x86)\Matrix Science\Mascot Daemon\mgf3 TFD - Epitel - R2\mascot\_daemon\_merge.mgf

Click mouse within plot area to zoom in by factor of two about that point

Or, Plot from  to  Da

Label all possible matches  Label matches used for scoring

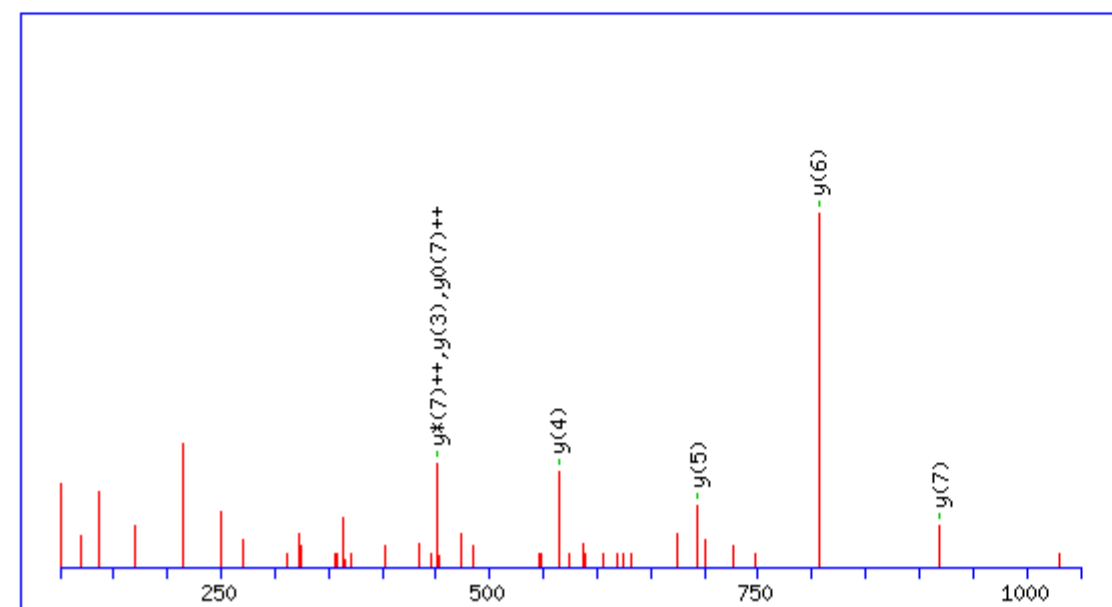

Monoisotopic mass of neutral peptide Mr(calc): 1046.542999

Fixed modifications: Carbamidomethyl (C) (apply to specified residues or termini only)

Variable modifications:

P2 : Oxidation (P)

M8 : Oxidation (M), with neutral losses 0.000000 (shown in table), 63.998285

Ions Score: 34 Expect: 0.0055

Matches : 7/108 fragment ions using 10 most intense peaks ([help](#))

| # | b          | b <sup>++</sup> | b <sup>*</sup> | b <sup>*++</sup> | b <sup>0</sup> | b <sup>0++</sup> | Seq. | y          | y <sup>++</sup> | y <sup>*</sup> | y <sup>*++</sup> | y <sup>0</sup> | y <sup>0++</sup> | # |
|---|------------|-----------------|----------------|------------------|----------------|------------------|------|------------|-----------------|----------------|------------------|----------------|------------------|---|
| 1 | 129.102239 | 65.054757       | 112.075690     | 56.541483        |                |                  | K    |            |                 |                |                  |                |                  | 8 |
| 2 | 242.149918 | 121.578597      | 225.123369     | 113.065322       |                |                  | P    | 919.455345 | 460.231311      | 902.428796     | 451.718036       | 901.444780     | 451.226028       | 7 |
| 3 | 355.233982 | 178.120629      | 338.207433     | 169.607354       |                |                  | L    | 806.407666 | 403.707471      | 789.381117     | 395.194197       | 788.397101     | 394.702189       | 6 |
| 4 | 484.276575 | 242.641925      | 467.250026     | 234.128651       | 466.266010     | 233.636643       | E    | 693.323602 | 347.165439      | 676.297053     | 338.652165       | 675.313037     | 338.160157       | 5 |
| 5 | 597.360639 | 299.183958      | 580.334090     | 290.670683       | 579.350074     | 290.178675       | L    | 564.281009 | 282.644143      | 547.254460     | 274.130868       | 546.270444     | 273.638860       | 4 |
| 6 | 753.461750 | 377.234513      | 736.435201     | 368.721238       | 735.451185     | 368.229230       | R    | 451.196945 | 226.102111      | 434.170396     | 217.588836       | 433.186380     | 217.096828       | 3 |
| 7 | 882.504343 | 441.755810      | 865.477794     | 433.242535       | 864.493778     | 432.750527       | E    | 295.095834 | 148.051555      |                |                  | 277.085269     | 139.046273       | 2 |
| 8 |            |                 |                |                  |                |                  | M    | 166.053241 | 83.530259       |                |                  |                |                  | 1 |

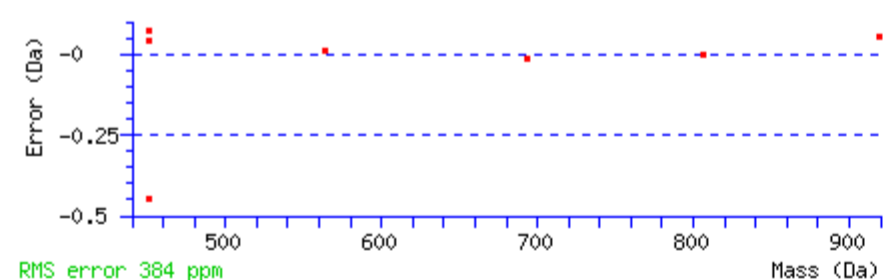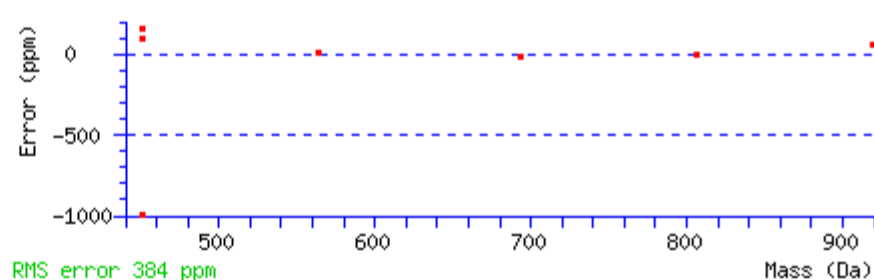

NCBI BLAST search of [KPLELREM](#)

(Parameters: blastp, nr protein database, expect=20000, no filter, PAM30)

Other BLAST [web gateways](#)

## All matches to this query

| Score | Mr(calc):   | Delta     | Sequence                  |
|-------|-------------|-----------|---------------------------|
| 34.1  | 1046.542999 | 0.008549  | <a href="#">KPLELREM</a>  |
| 12.8  | 1046.550888 | 0.000660  | <a href="#">QLLSFGNPR</a> |
| 9.5   | 1046.543030 | 0.008518  | <a href="#">QVQKEVSVM</a> |
| 8.3   | 1046.550858 | 0.000690  | <a href="#">QLYENKPR</a>  |
| 7.8   | 1046.547028 | 0.004520  | <a href="#">LLKELWDM</a>  |
| 3.3   | 1046.542999 | 0.008549  | <a href="#">LLGAEERIM</a> |
| 1.4   | 1046.554245 | -0.002697 | <a href="#">LQEITRCK</a>  |
| 1.4   | 1046.560760 | -0.009212 | <a href="#">KISTEDINK</a> |
| 1.4   | 1046.560760 | -0.009212 | <a href="#">KLENTISK</a>  |
| 0.5   | 1046.542999 | 0.008549  | <a href="#">LKELGINNM</a> |

Mascot: <http://www.matrixscience.com/>

# Mascot Search Results

## Peptide View

MS/MS Fragmentation of **ILLTQENPFFR**

Found in **NSUN2\_HUMAN**, tRNA (cytosine(34)-C(5))-methyltransferase OS=Homo sapiens GN=NSUN2 PE=1 SV=2

Match to Query 45397: 1376.736968 from(689.375760,2+) rtinseconds(3442) index(50518)

Title: Locus:1.1.1.1697.31

Data file 2012-01-27 - TFD - Epitel - IEC - 10ul - 1.mgf

Click mouse within plot area to zoom in by factor of two about that point

Or, Plot from  to  Da

Label all possible matches  Label matches used for scoring

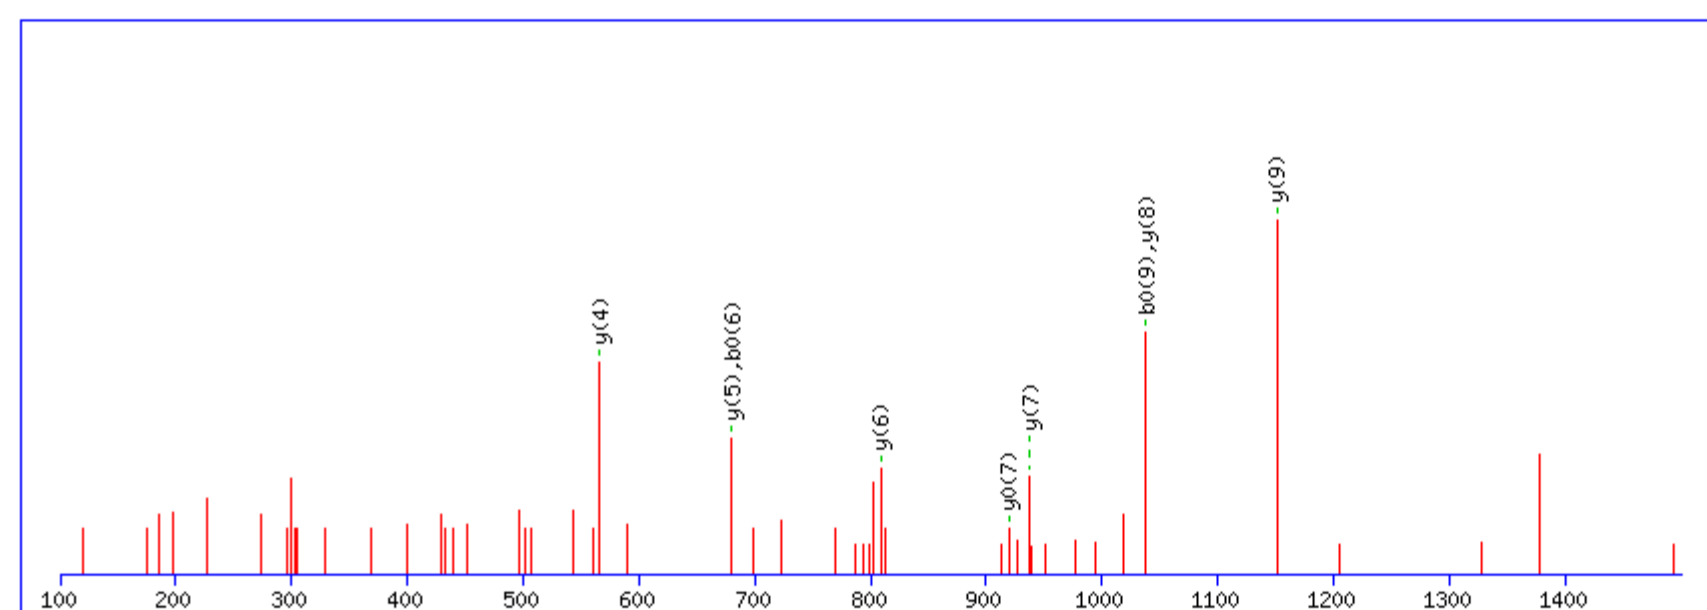

Monoisotopic mass of neutral peptide Mr(calc): 1376.745224

Fixed modifications: Carbamidomethyl (C) (apply to specified residues or termini only)

Ions Score: 39 Expect: 0.0012

Matches: 9/96 fragment ions using 12 most intense peaks ([help](#))

| #  | b           | b <sup>++</sup> | b <sup>*</sup> | b <sup>*++</sup> | b <sup>0</sup>     | b <sup>0++</sup> | Seq. | y                  | y <sup>++</sup> | y <sup>*</sup> | y <sup>*++</sup> | y <sup>0</sup>    | y <sup>0++</sup> | #  |
|----|-------------|-----------------|----------------|------------------|--------------------|------------------|------|--------------------|-----------------|----------------|------------------|-------------------|------------------|----|
| 1  | 114.091340  | 57.549308       |                |                  |                    |                  | I    |                    |                 |                |                  |                   |                  | 11 |
| 2  | 227.175404  | 114.091340      |                |                  |                    |                  | L    | 1264.668449        | 632.837863      | 1247.641900    | 624.324588       | 1246.657884       | 623.832580       | 10 |
| 3  | 340.259468  | 170.633372      |                |                  |                    |                  | L    | <b>1151.584385</b> | 576.295831      | 1134.557836    | 567.782556       | 1133.573820       | 567.290548       | 9  |
| 4  | 441.307147  | 221.157211      |                |                  | 423.296582         | 212.151929       | T    | <b>1038.500321</b> | 519.753799      | 1021.473772    | 511.240524       | 1020.489756       | 510.748516       | 8  |
| 5  | 569.365725  | 285.186501      | 552.339176     | 276.673226       | 551.355160         | 276.181218       | Q    | <b>937.452642</b>  | 469.229959      | 920.426093     | 460.716685       | <b>919.442077</b> | 460.224677       | 7  |
| 6  | 698.408318  | 349.707797      | 681.381769     | 341.194523       | <b>680.397753</b>  | 340.702515       | E    | <b>809.394064</b>  | 405.200670      | 792.367515     | 396.687396       | 791.383499        | 396.195388       | 6  |
| 7  | 812.451245  | 406.729261      | 795.424696     | 398.215986       | 794.440680         | 397.723978       | N    | <b>680.351471</b>  | 340.679374      | 663.324922     | 332.166099       |                   |                  | 5  |
| 8  | 909.504009  | 455.255643      | 892.477460     | 446.742368       | 891.493444         | 446.250360       | P    | <b>566.308544</b>  | 283.657910      | 549.281995     | 275.144636       |                   |                  | 4  |
| 9  | 1056.572423 | 528.789850      | 1039.545874    | 520.276575       | <b>1038.561858</b> | 519.784567       | F    | 469.255780         | 235.131528      | 452.229231     | 226.618253       |                   |                  | 3  |
| 10 | 1203.640837 | 602.324057      | 1186.614288    | 593.810782       | 1185.630272        | 593.318774       | F    | 322.187366         | 161.597321      | 305.160817     | 153.084047       |                   |                  | 2  |
| 11 |             |                 |                |                  |                    |                  | R    | 175.118952         | 88.063114       | 158.092403     | 79.549839        |                   |                  | 1  |

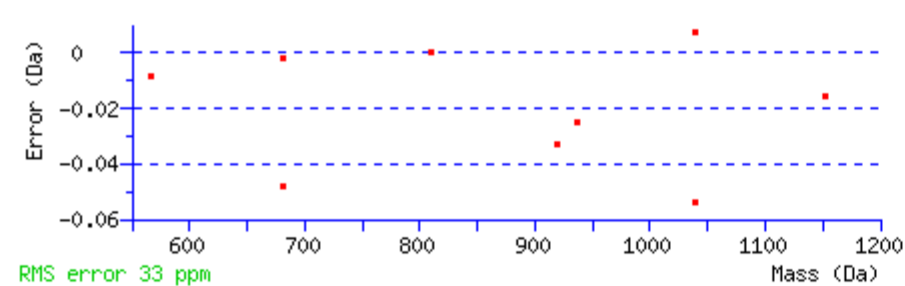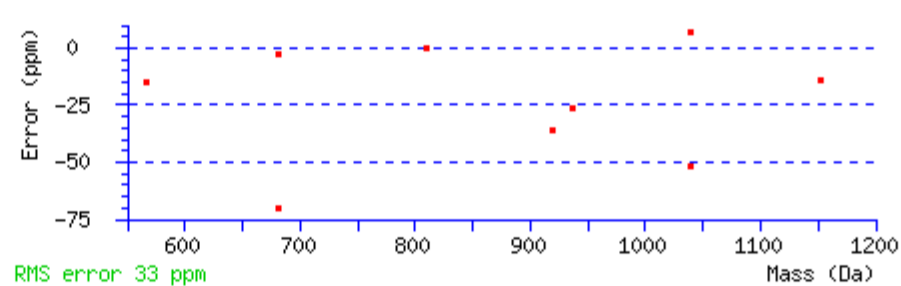

NCBI BLAST search of [ILLTQENPFFR](#)

(Parameters: blastp, nr protein database, expect=20000, no filter, PAM30)

Other BLAST [web gateways](#)

All matches to this query

| Score | Mr(calc):   | Delta     | Sequence                     |
|-------|-------------|-----------|------------------------------|
| 38.7  | 1376.745224 | -0.008256 | <a href="#">ILLTQENPFFR</a>  |
| 7.0   | 1376.745239 | -0.008271 | <a href="#">LPPTWKPLPHK</a>  |
| 6.7   | 1376.723465 | 0.013503  | <a href="#">IPVGP SILHCR</a> |
| 0.1   | 1376.737366 | -0.000398 | <a href="#">LLLPLFREVD M</a> |

Mascot: <http://www.matrixscience.com/>

# MASCOT SCIENCE Mascot Search Results

## Peptide View

MS/MS Fragmentation of **TIEDDLVSALVR**

Found in **TRUA\_HUMAN**, tRNA pseudouridine synthase A, mitochondrial OS=Homo sapiens GN=PUS1 PE=1 SV=3

Match to Query 37940: 1329.723488 from(665.869020,2+) rtinseconds(3772) index(55947)

Title: Locus:1.1.1.2772.29

Data file 2011-11-10 - TFD - EP 3-4.mgf

Click mouse within plot area to zoom in by factor of two about that point

Or, Plot from  to  Da

Label all possible matches  Label matches used for scoring

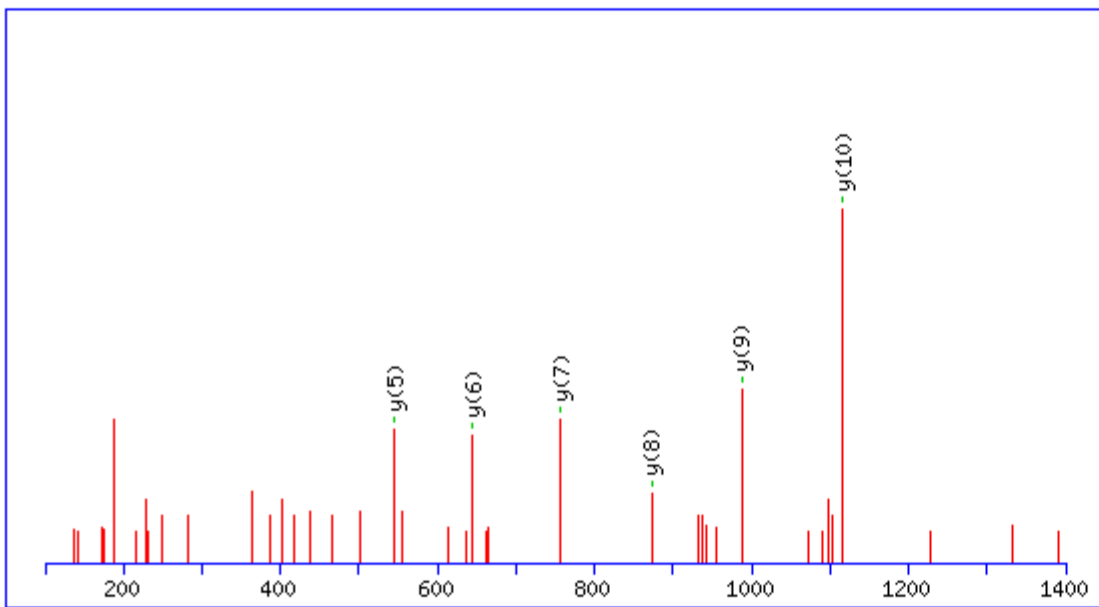

Monoisotopic mass of neutral peptide  $M_r(\text{calc})$ : 1329.713989

Fixed modifications: Propionamide (C) (apply to specified residues or termini only)

Ions Score: 39 Expect: 0.00022

Matches : 6/102 fragment ions using 11 most intense peaks [\(help\)](#)

| #  | b           | b <sup>++</sup> | b <sup>0</sup> | b <sup>0++</sup> | Seq. | y                  | y <sup>++</sup> | y <sup>*</sup> | y <sup>*++</sup> | y <sup>0</sup> | y <sup>0++</sup> | #  |
|----|-------------|-----------------|----------------|------------------|------|--------------------|-----------------|----------------|------------------|----------------|------------------|----|
| 1  | 102.054955  | 51.531116       | 84.044390      | 42.525833        | T    |                    |                 |                |                  |                |                  | 12 |
| 2  | 215.139019  | 108.073147      | 197.128454     | 99.067865        | I    | 1229.673593        | 615.340435      | 1212.647044    | 606.827160       | 1211.663028    | 606.335152       | 11 |
| 3  | 344.181612  | 172.594444      | 326.171047     | 163.589162       | E    | <b>1116.589529</b> | 558.798403      | 1099.562980    | 550.285128       | 1098.578964    | 549.793120       | 10 |
| 4  | 459.208555  | 230.107916      | 441.197990     | 221.102633       | D    | <b>987.546936</b>  | 494.277106      | 970.520387     | 485.763831       | 969.536371     | 485.271823       | 9  |
| 5  | 574.235498  | 287.621387      | 556.224933     | 278.616105       | D    | <b>872.519993</b>  | 436.763634      | 855.493444     | 428.250360       | 854.509428     | 427.758352       | 8  |
| 6  | 687.319562  | 344.163419      | 669.308997     | 335.158137       | L    | <b>757.493050</b>  | 379.250163      | 740.466501     | 370.736888       | 739.482485     | 370.244880       | 7  |
| 7  | 786.387976  | 393.697626      | 768.377411     | 384.692344       | V    | <b>644.408986</b>  | 322.708131      | 627.382437     | 314.194856       | 626.398421     | 313.702848       | 6  |
| 8  | 873.420004  | 437.213640      | 855.409439     | 428.208358       | S    | <b>545.340572</b>  | 273.173924      | 528.314023     | 264.660649       | 527.330007     | 264.168641       | 5  |
| 9  | 944.457118  | 472.732197      | 926.446553     | 463.726915       | A    | 458.308544         | 229.657910      | 441.281995     | 221.144635       |                |                  | 4  |
| 10 | 1057.541182 | 529.274229      | 1039.530617    | 520.268946       | L    | 387.271430         | 194.139353      | 370.244881     | 185.626078       |                |                  | 3  |
| 11 | 1156.609596 | 578.808436      | 1138.599031    | 569.803154       | V    | 274.187366         | 137.597321      | 257.160817     | 129.084047       |                |                  | 2  |
| 12 |             |                 |                |                  | R    | 175.118952         | 88.063114       | 158.092403     | 79.549839        |                |                  | 1  |

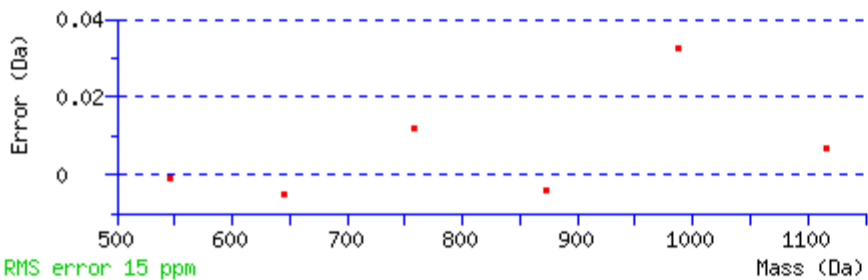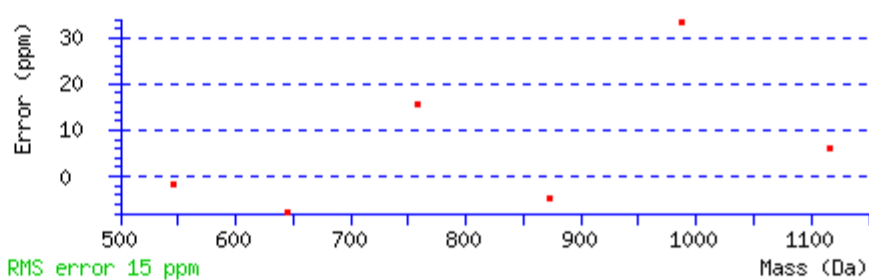

NCBI BLAST search of [TIEDDLVSALVR](#)

(Parameters: blastp, nr protein database, expect=20000, no filter, PAM30)

Other BLAST [web gateways](#)

## All matches to this query

| Score | $M_r(\text{calc})$ : | Delta     | Sequence                     |
|-------|----------------------|-----------|------------------------------|
| 39.4  | 1329.713989          | 0.009499  | <a href="#">TIEDDLVSALVR</a> |
| 0.5   | 1329.732605          | -0.009117 | <a href="#">TLMLPLTEGSLR</a> |

# MASCOT Search Results

## Peptide View

MS/MS Fragmentation of **IMKDLIK**

Found in **TP8L3\_HUMAN**, Tumor necrosis factor alpha-induced protein 8-like protein 3 OS=Homo sapiens GN=TNFAIP8L3 PE=2 SV=1

Match to Query 6851: 875.514588 from(438.764570,2+) rtinseconds(3023) index(37352)

Title: Locus:1.1.1.2419.5

Data file 2011-11-10 - TFD - EP 3-6.mgf

Click mouse within plot area to zoom in by factor of two about that point

Or, Plot from  to  Da

Label all possible matches  Label matches used for scoring

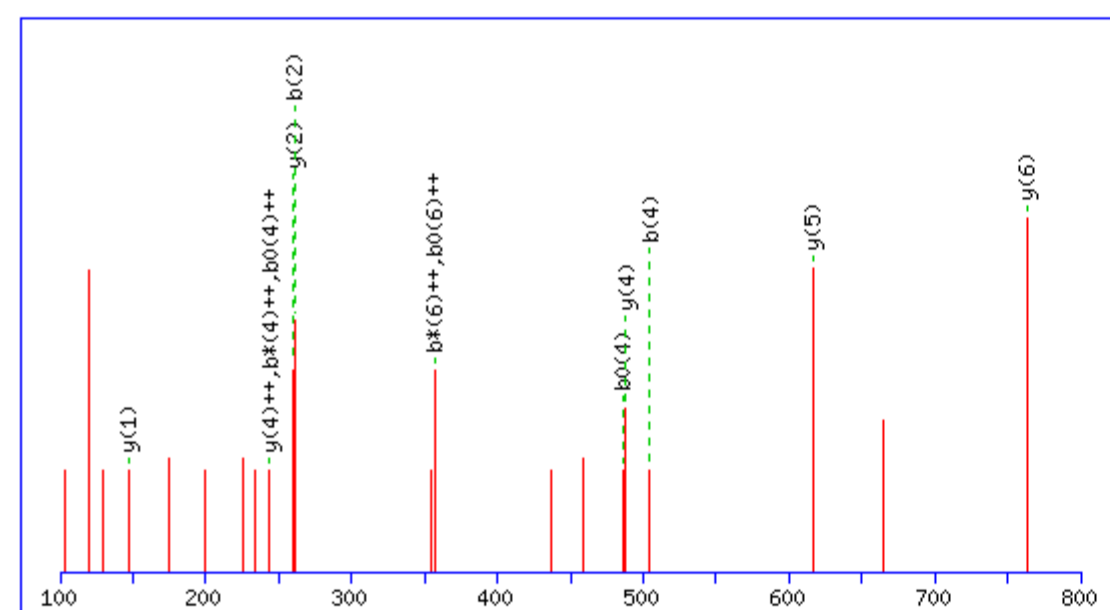

Monoisotopic mass of neutral peptide Mr(calc): 875.514999

Fixed modifications: Propionamide (C) (apply to specified residues or termini only)

Variable modifications:

M2 : Oxidation (M), with neutral losses 0.000000 (shown in table), 63.998285

Ions Score: 30 Expect: 0.0075

Matches : 13/86 fragment ions using 20 most intense peaks ([help](#))

| # | b                 | b <sup>++</sup> | b <sup>*</sup> | b <sup>*++</sup>  | b <sup>0</sup>    | b <sup>0++</sup>  | Seq. | y                 | y <sup>++</sup>   | y <sup>*</sup> | y <sup>*++</sup> | y <sup>0</sup> | y <sup>0++</sup> | # |
|---|-------------------|-----------------|----------------|-------------------|-------------------|-------------------|------|-------------------|-------------------|----------------|------------------|----------------|------------------|---|
| 1 | 114.091340        | 57.549308       |                |                   |                   |                   | I    |                   |                   |                |                  |                |                  | 7 |
| 2 | <b>261.126740</b> | 131.067008      |                |                   |                   |                   | M    | <b>763.438238</b> | 382.222757        | 746.411689     | 373.709483       | 745.427673     | 373.217475       | 6 |
| 3 | 389.221703        | 195.114489      | 372.195154     | 186.601215        |                   |                   | K    | <b>616.402838</b> | 308.705057        | 599.376289     | 300.191783       | 598.392273     | 299.699775       | 5 |
| 4 | <b>504.248646</b> | 252.627961      | 487.222097     | <b>244.114687</b> | <b>486.238081</b> | <b>243.622679</b> | D    | <b>488.307875</b> | <b>244.657575</b> | 471.281326     | 236.144301       | 470.297310     | 235.652293       | 4 |
| 5 | 617.332710        | 309.169993      | 600.306161     | 300.656719        | 599.322145        | 300.164711        | L    | 373.280932        | 187.144104        | 356.254383     | 178.630829       |                |                  | 3 |
| 6 | 730.416774        | 365.712025      | 713.390225     | <b>357.198751</b> | 712.406209        | <b>356.706743</b> | I    | <b>260.196868</b> | 130.602072        | 243.170319     | 122.088798       |                |                  | 2 |
| 7 |                   |                 |                |                   |                   |                   | K    | <b>147.112804</b> | 74.060040         | 130.086255     | 65.546765        |                |                  | 1 |

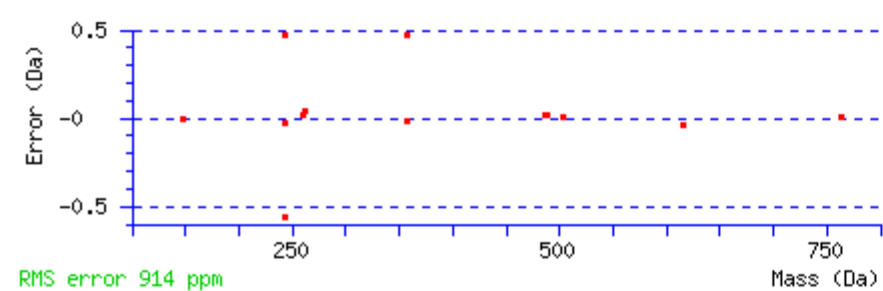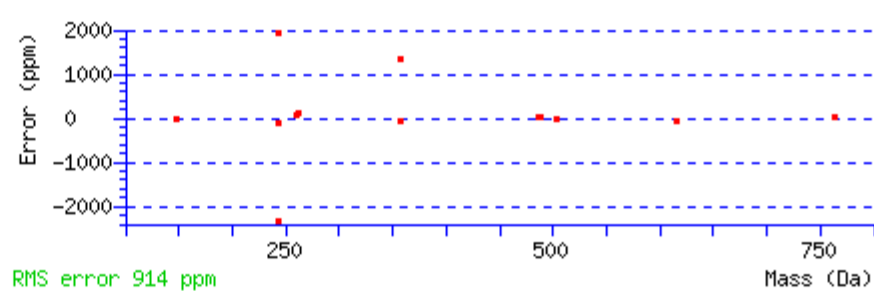

NCBI BLAST search of [IMKDLIK](#)

(Parameters: blastp, nr protein database, expect=20000, no filter, PAM30)

Other BLAST [web gateways](#)

All matches to this query

| Score | Mr(calc):  | Delta     | Sequence                 |
|-------|------------|-----------|--------------------------|
| 30.3  | 875.514999 | -0.000411 | <a href="#">IMKDLIK</a>  |
| 19.3  | 875.511658 | 0.002930  | <a href="#">LFVGSIPK</a> |
| 16.2  | 875.511642 | 0.002946  | <a href="#">IFLQDIK</a>  |
| 15.7  | 875.522873 | -0.008285 | <a href="#">FLKGLGNK</a> |
| 14.1  | 875.522873 | -0.008285 | <a href="#">IFIRSPK</a>  |
| 12.7  | 875.522873 | -0.008285 | <a href="#">ISRFPLK</a>  |
| 11.5  | 875.511642 | 0.002946  | <a href="#">LKFIDPK</a>  |
| 11.0  | 875.522873 | -0.008285 | <a href="#">VLQFKNK</a>  |
| 10.7  | 875.511627 | 0.002961  | <a href="#">FLNELIK</a>  |
| 10.7  | 875.522873 | -0.008285 | <a href="#">FLRSPLK</a>  |

Mascot: <http://www.matrixscience.com/>

# MASCOT SCIENCE Mascot Search Results

## Peptide View

MS/MS Fragmentation of **LLYPPETGLFLVR**

Found in **CSK\_HUMAN**, Tyrosine-protein kinase CSK OS=Homo sapiens GN=CSK PE=1 SV=1

Match to Query 46675: 1516.872648 from(759.443600,2+) rtinseconds(3742) index(56346)

Title: Locus:1.1.1.2842.30

Data file 2011-11-10 - TFD - EP 3-3.mgf

Click mouse within plot area to zoom in by factor of two about that point

Or, Plot from  to  Da

Label all possible matches  Label matches used for scoring

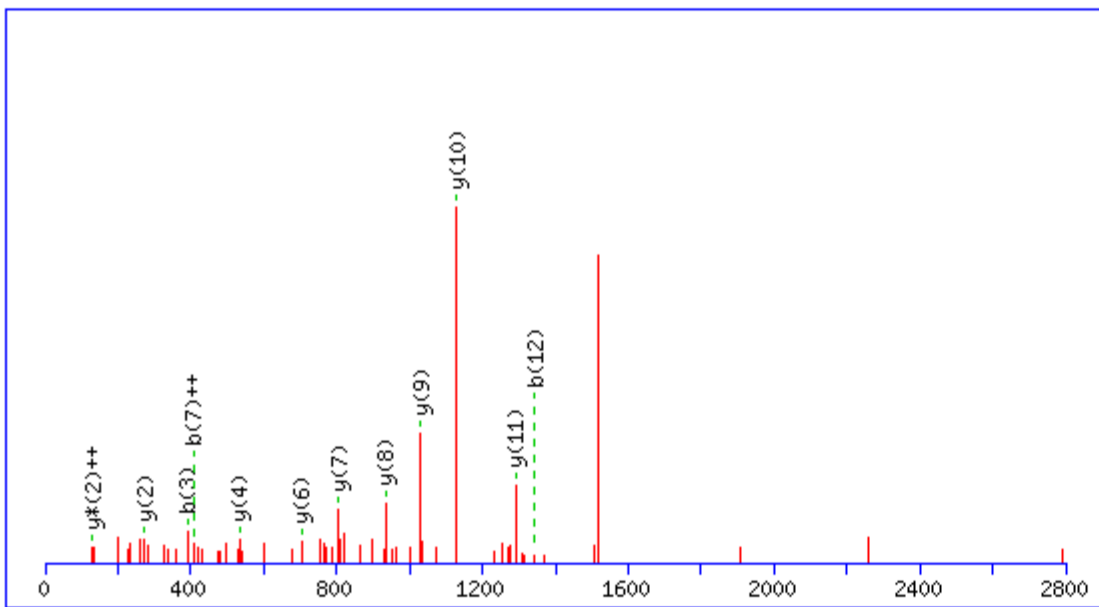

Monoisotopic mass of neutral peptide Mr(calc): 1516.865341

Fixed modifications: Propionamide (C) (apply to specified residues or termini only)

Ions Score: 43 Expect: 0.00018

Matches : 12/98 fragment ions using 26 most intense peaks [\(help\)](#)

| #  | b                  | b <sup>++</sup>   | b <sup>0</sup> | b <sup>0++</sup> | Seq. | y                  | y <sup>++</sup> | y <sup>*</sup> | y <sup>*++</sup>  | y <sup>0</sup> | y <sup>0++</sup> | #  |
|----|--------------------|-------------------|----------------|------------------|------|--------------------|-----------------|----------------|-------------------|----------------|------------------|----|
| 1  | 114.091340         | 57.549308         |                |                  | L    |                    |                 |                |                   |                |                  | 13 |
| 2  | 227.175404         | 114.091340        |                |                  | L    | 1404.788565        | 702.897921      | 1387.762016    | 694.384646        | 1386.778000    | 693.892638       | 12 |
| 3  | <b>390.238733</b>  | 195.623004        |                |                  | Y    | <b>1291.704501</b> | 646.355889      | 1274.677952    | 637.842614        | 1273.693936    | 637.350606       | 11 |
| 4  | 487.291497         | 244.149386        |                |                  | P    | <b>1128.641172</b> | 564.824224      | 1111.614623    | 556.310950        | 1110.630607    | 555.818942       | 10 |
| 5  | 584.344261         | 292.675769        |                |                  | P    | <b>1031.588408</b> | 516.297842      | 1014.561859    | 507.784568        | 1013.577843    | 507.292560       | 9  |
| 6  | 713.386854         | 357.197065        | 695.376289     | 348.191783       | E    | <b>934.535644</b>  | 467.771460      | 917.509095     | 459.258186        | 916.525079     | 458.766178       | 8  |
| 7  | 814.434533         | <b>407.720905</b> | 796.423968     | 398.715622       | T    | <b>805.493051</b>  | 403.250164      | 788.466502     | 394.736889        | 787.482486     | 394.244881       | 7  |
| 8  | 871.455997         | 436.231637        | 853.445432     | 427.226354       | G    | <b>704.445372</b>  | 352.726324      | 687.418823     | 344.213050        |                |                  | 6  |
| 9  | 984.540061         | 492.773669        | 966.529496     | 483.768386       | L    | 647.423908         | 324.215592      | 630.397359     | 315.702318        |                |                  | 5  |
| 10 | 1131.608475        | 566.307876        | 1113.597910    | 557.302593       | F    | <b>534.339844</b>  | 267.673560      | 517.313295     | 259.160286        |                |                  | 4  |
| 11 | 1244.692539        | 622.849908        | 1226.681974    | 613.844625       | L    | 387.271430         | 194.139353      | 370.244881     | 185.626078        |                |                  | 3  |
| 12 | <b>1343.760953</b> | 672.384115        | 1325.750388    | 663.378832       | V    | <b>274.187366</b>  | 137.597321      | 257.160817     | <b>129.084047</b> |                |                  | 2  |
| 13 |                    |                   |                |                  | R    | 175.118952         | 88.063114       | 158.092403     | 79.549839         |                |                  | 1  |

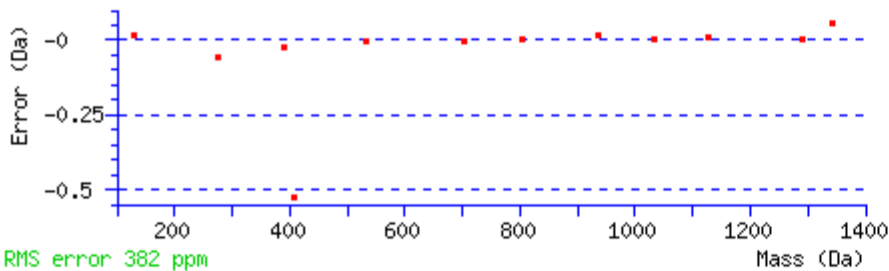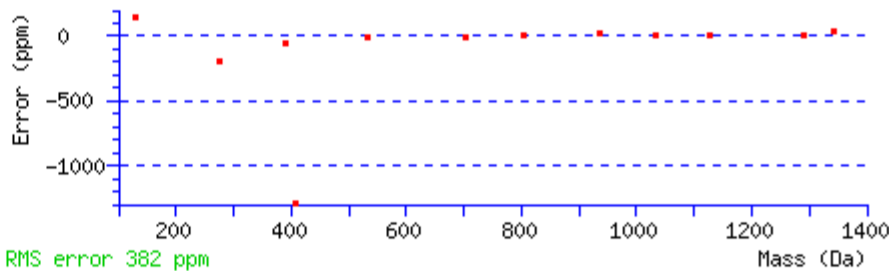

NCBI BLAST search of [LLYPPETGLFLVR](#)

(Parameters: blastp, nr protein database, expect=20000, no filter, PAM30)

Other BLAST [web gateways](#)

All matches to this query

| Score | Mr(calc):   | Delta    | Sequence                      |
|-------|-------------|----------|-------------------------------|
| 43.2  | 1516.865341 | 0.007307 | <a href="#">LLYPPETGLFLVR</a> |

Mascot: <http://www.matrixscience.com/>

# MASCOT SEARCH RESULTS

## Peptide View

MS/MS Fragmentation of **FSYLAVIEGAK**

Found in **PTN1\_HUMAN**, Tyrosine-protein phosphatase non-receptor type 1 OS=Homo sapiens GN=PTPN1 PE=1 SV=1

Match to Query 29138: 1196.637888 from(599.326220,2+) rtinseconds(3357) index(47644)

Title: Locus:1.1.1.2691.8

Data file 2011-11-12 - TFD - EP 5-4.mgf

Click mouse within plot area to zoom in by factor of two about that point

Or, Plot from  to  Da

Label all possible matches  Label matches used for scoring

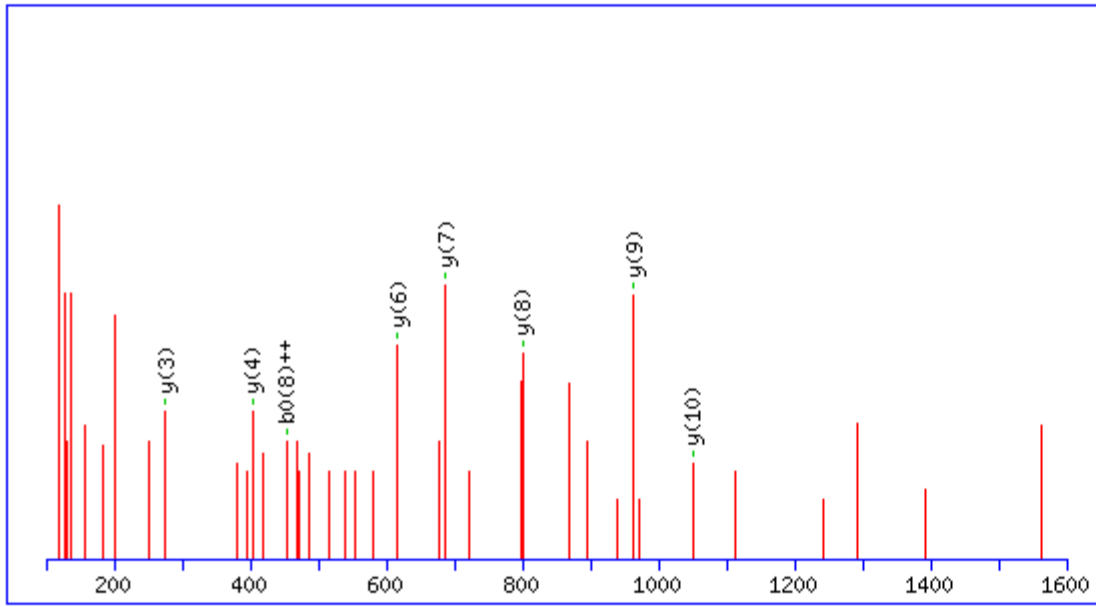

Monoisotopic mass of neutral peptide Mr(calc): 1196.644104

Fixed modifications: Propionamide (C) (apply to specified residues or termini only)

Ions Score: 57 Expect: 1.5e-005

Matches : 8/92 fragment ions using 10 most intense peaks [\(help\)](#)

| #  | b           | b <sup>++</sup> | b <sup>0</sup> | b <sup>0++</sup>  | Seq. | y                  | y <sup>++</sup> | y <sup>*</sup> | y <sup>*++</sup> | y <sup>0</sup> | y <sup>0++</sup> | #  |
|----|-------------|-----------------|----------------|-------------------|------|--------------------|-----------------|----------------|------------------|----------------|------------------|----|
| 1  | 148.075690  | 74.541483       |                |                   | F    |                    |                 |                |                  |                |                  | 11 |
| 2  | 235.107718  | 118.057497      | 217.097153     | 109.052214        | S    | <b>1050.582988</b> | 525.795132      | 1033.556439    | 517.281858       | 1032.572423    | 516.789850       | 10 |
| 3  | 398.171047  | 199.589161      | 380.160482     | 190.583879        | Y    | <b>963.550960</b>  | 482.279118      | 946.524411     | 473.765844       | 945.540395     | 473.273836       | 9  |
| 4  | 511.255111  | 256.131193      | 493.244546     | 247.125911        | L    | <b>800.487631</b>  | 400.747454      | 783.461082     | 392.234179       | 782.477066     | 391.742171       | 8  |
| 5  | 582.292225  | 291.649751      | 564.281660     | 282.644468        | A    | <b>687.403567</b>  | 344.205422      | 670.377018     | 335.692147       | 669.393002     | 335.200139       | 7  |
| 6  | 681.360639  | 341.183958      | 663.350074     | 332.178675        | V    | <b>616.366453</b>  | 308.686865      | 599.339904     | 300.173590       | 598.355888     | 299.681582       | 6  |
| 7  | 794.444703  | 397.725990      | 776.434138     | 388.720707        | I    | 517.298039         | 259.152658      | 500.271490     | 250.639383       | 499.287474     | 250.147375       | 5  |
| 8  | 923.487296  | 462.247286      | 905.476731     | <b>453.242004</b> | E    | <b>404.213975</b>  | 202.610626      | 387.187426     | 194.097351       | 386.203410     | 193.605343       | 4  |
| 9  | 980.508760  | 490.758018      | 962.498195     | 481.752736        | G    | <b>275.171382</b>  | 138.089329      | 258.144833     | 129.576055       |                |                  | 3  |
| 10 | 1051.545874 | 526.276575      | 1033.535309    | 517.271293        | A    | 218.149918         | 109.578597      | 201.123369     | 101.065323       |                |                  | 2  |
| 11 |             |                 |                |                   | K    | 147.112804         | 74.060040       | 130.086255     | 65.546765        |                |                  | 1  |

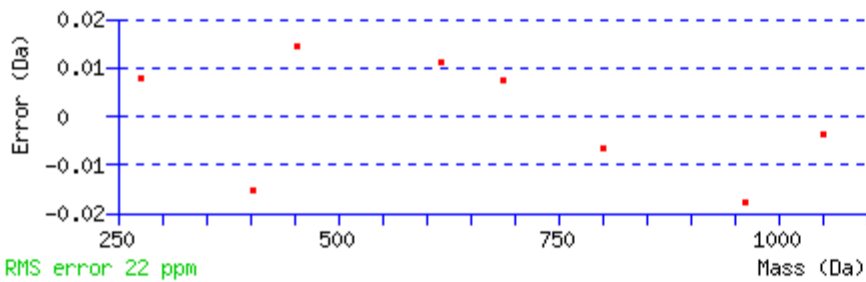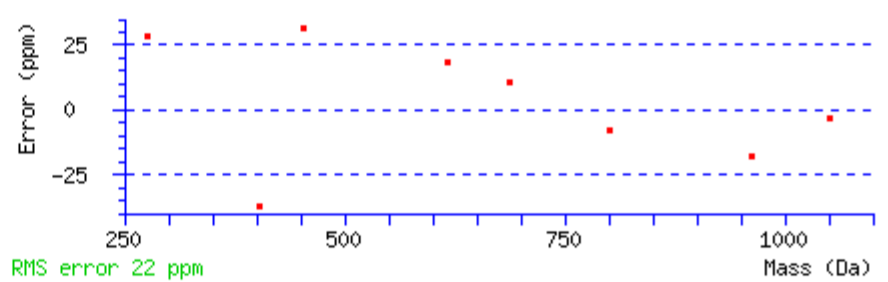

NCBI BLAST search of [FSYLAVIEGAK](#)

(Parameters: blastp, nr protein database, expect=20000, no filter, PAM30)

Other BLAST [web gateways](#)

## All matches to this query

| Score | Mr(calc):   | Delta     | Sequence                    |
|-------|-------------|-----------|-----------------------------|
| 57.0  | 1196.644104 | -0.006216 | <a href="#">FSYLAVIEGAK</a> |

Mascot: <http://www.matrixscience.com/>

# MASCOT Search Results

## Peptide View

MS/MS Fragmentation of **EPAGPAPGR**

Found in **SHPS1\_HUMAN**, Tyrosine-protein phosphatase non-receptor type substrate 1 OS=Homo sapiens GN=SIRPA PE=1 SV=2

Match to Query 64000: 850.436968 from(426.225760,2+) rtinseconds(863) index(241223)

Title: Locus:1.1.1.768.3

Data file C:\Program Files (x86)\Matrix Science\Mascot Daemon\mgf3 TFD - Epitel - R2\mascot\_daemon\_merge.mgf

Click mouse within plot area to zoom in by factor of two about that point

Or, Plot from  to  Da

Label all possible matches  Label matches used for scoring

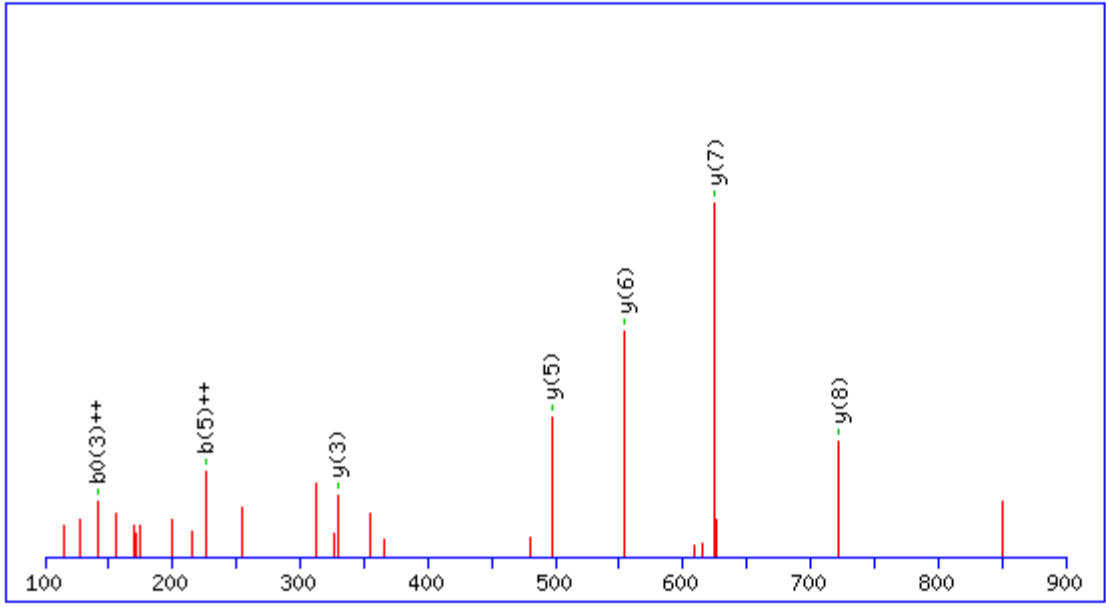

Monoisotopic mass of neutral peptide Mr(calc): 850.429703

Fixed modifications: Carbamidomethyl (C) (apply to specified residues or termini only)

Ions Score: 43 Expect: 0.00043

Matches : 7/64 fragment ions using 7 most intense peaks ([help](#))

| # | b          | b <sup>++</sup> | b <sup>0</sup> | b <sup>0++</sup> | Seq. | y          | y <sup>++</sup> | y <sup>*</sup> | y <sup>*++</sup> | # |
|---|------------|-----------------|----------------|------------------|------|------------|-----------------|----------------|------------------|---|
| 1 | 130.049869 | 65.528572       | 112.039304     | 56.523290        | E    |            |                 |                |                  | 9 |
| 2 | 227.102633 | 114.054954      | 209.092068     | 105.049672       | P    | 722.394400 | 361.700838      | 705.367851     | 353.187564       | 8 |
| 3 | 298.139747 | 149.573512      | 280.129182     | 140.568229       | A    | 625.341636 | 313.174456      | 608.315087     | 304.661182       | 7 |
| 4 | 355.161211 | 178.084243      | 337.150646     | 169.078961       | G    | 554.304522 | 277.655899      | 537.277973     | 269.142625       | 6 |
| 5 | 452.213975 | 226.610625      | 434.203410     | 217.605343       | P    | 497.283058 | 249.145167      | 480.256509     | 240.631892       | 5 |
| 6 | 523.251089 | 262.129183      | 505.240524     | 253.123900       | A    | 400.230294 | 200.618785      | 383.203745     | 192.105510       | 4 |
| 7 | 620.303853 | 310.655565      | 602.293288     | 301.650282       | P    | 329.193180 | 165.100228      | 312.166631     | 156.586953       | 3 |
| 8 | 677.325317 | 339.166297      | 659.314752     | 330.161014       | G    | 232.140416 | 116.573846      | 215.113867     | 108.060571       | 2 |
| 9 |            |                 |                |                  | R    | 175.118952 | 88.063114       | 158.092403     | 79.549839        | 1 |

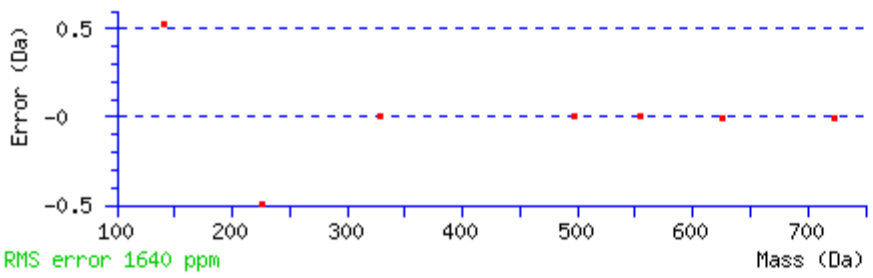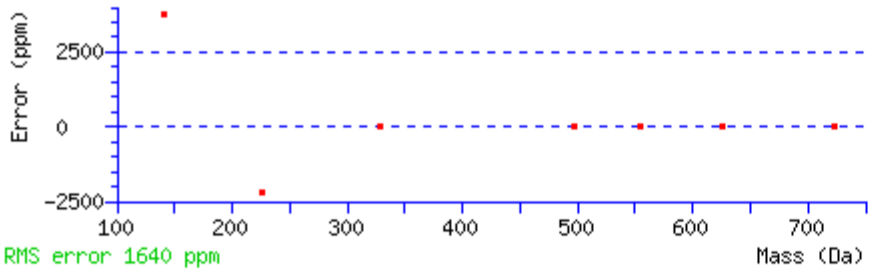

NCBI BLAST search of [EPAGPAPGR](#)

(Parameters: blastp, nr protein database, expect=20000, no filter, PAM30)

Other BLAST [web gateways](#)

### All matches to this query

| Score | Mr(calc):  | Delta     | Sequence                  |
|-------|------------|-----------|---------------------------|
| 42.6  | 850.429703 | 0.007265  | <a href="#">EPAGPAPGR</a> |
| 6.3   | 850.429703 | 0.007265  | <a href="#">PEPQAPGR</a>  |
| 4.4   | 850.429688 | 0.007280  | <a href="#">ELEAPHR</a>   |
| 3.4   | 850.440918 | -0.003950 | <a href="#">KEPNAHR</a>   |
| 2.5   | 850.443604 | -0.006636 | <a href="#">ILAYDEK</a>   |
| 1.8   | 850.437103 | -0.000135 | <a href="#">YPVVMAR</a>   |
| 1.6   | 850.440918 | -0.003950 | <a href="#">EPNAHRK</a>   |

# MASCOT SCIENCE Mascot Search Results

## Peptide View

MS/MS Fragmentation of **DPIPYP L P P L E K**

Found in **RUI7\_HUMAN**, U1 small nuclear ribonucleoprotein 70 kDa OS=Homo sapiens GN=SNRNP70 PE=1 SV=2

Match to Query 32129: 1280.705248 from(641.359900,2+) rtinseconds(3084) index(43865)

Title: Locus:1.1.1.2592.20

Data file 2011-11-10 - TFD - EP 3-3.mgf

Click mouse within plot area to zoom in by factor of two about that point

Or, Plot from  to  Da

Label all possible matches  Label matches used for scoring

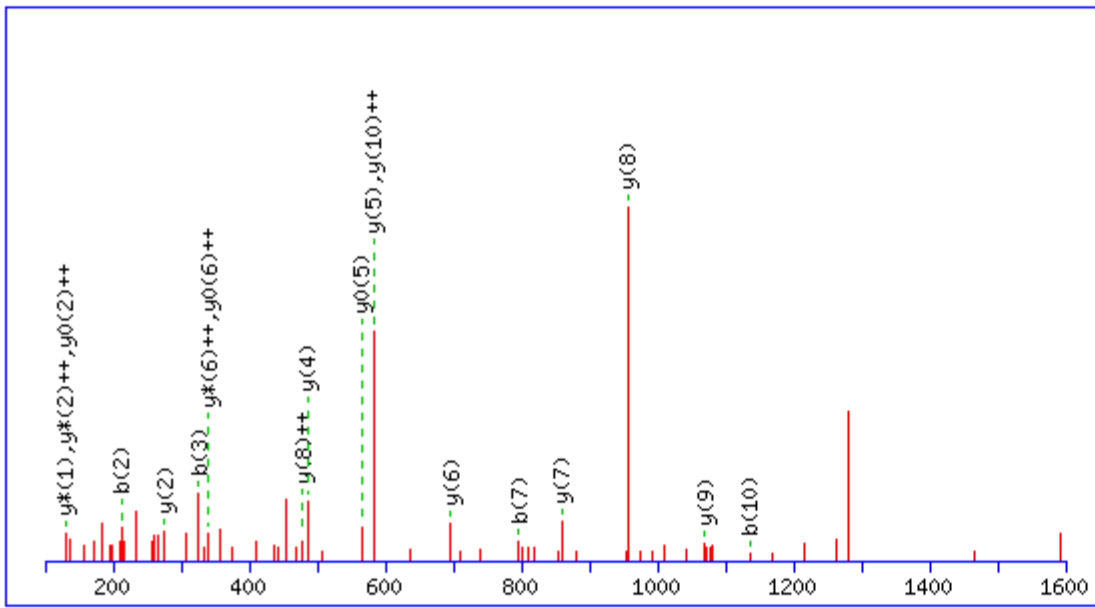

Monoisotopic mass of neutral peptide Mr(calc): 1280.701614

Fixed modifications: Propionamide (C) (apply to specified residues or termini only)

Ions Score: 38 Expect: 0.00074

Matches : 19/98 fragment ions using 33 most intense peaks [\(help\)](#)

| #  | b                  | b <sup>++</sup> | b <sup>0</sup> | b <sup>0++</sup> | Seq. | y                  | y <sup>++</sup>   | y <sup>*</sup>    | y <sup>*++</sup>  | y <sup>0</sup>    | y <sup>0++</sup>  | #  |
|----|--------------------|-----------------|----------------|------------------|------|--------------------|-------------------|-------------------|-------------------|-------------------|-------------------|----|
| 1  | 116.034219         | 58.520748       | 98.023654      | 49.515465        | D    |                    |                   |                   |                   |                   |                   | 11 |
| 2  | <b>213.086983</b>  | 107.047129      | 195.076418     | 98.041847        | P    | 1166.681974        | <b>583.844625</b> | 1149.655425       | 575.331351        | 1148.671409       | 574.839343        | 10 |
| 3  | <b>326.171047</b>  | 163.589161      | 308.160482     | 154.583879       | I    | <b>1069.629210</b> | 535.318243        | 1052.602661       | 526.804969        | 1051.618645       | 526.312961        | 9  |
| 4  | 423.223811         | 212.115544      | 405.213246     | 203.110261       | P    | <b>956.545146</b>  | <b>478.776211</b> | 939.518597        | 470.262937        | 938.534581        | 469.770929        | 8  |
| 5  | 586.287140         | 293.647208      | 568.276575     | 284.641926       | Y    | <b>859.492382</b>  | 430.249829        | 842.465833        | 421.736555        | 841.481817        | 421.244547        | 7  |
| 6  | 699.371204         | 350.189240      | 681.360639     | 341.183958       | L    | <b>696.429053</b>  | 348.718165        | 679.402504        | <b>340.204890</b> | 678.418488        | <b>339.712882</b> | 6  |
| 7  | <b>796.423968</b>  | 398.715622      | 778.413403     | 389.710340       | P    | <b>583.344989</b>  | 292.176133        | 566.318440        | 283.662858        | <b>565.334424</b> | 283.170850        | 5  |
| 8  | 893.476732         | 447.242004      | 875.466167     | 438.236722       | P    | <b>486.292225</b>  | 243.649750        | 469.265676        | 235.136476        | 468.281660        | 234.644468        | 4  |
| 9  | 1006.560796        | 503.784036      | 988.550231     | 494.778754       | L    | 389.239461         | 195.123368        | 372.212912        | 186.610094        | 371.228896        | 186.118086        | 3  |
| 10 | <b>1135.603389</b> | 568.305333      | 1117.592824    | 559.300050       | E    | <b>276.155397</b>  | 138.581336        | 259.128848        | <b>130.068062</b> | 258.144832        | <b>129.576054</b> | 2  |
| 11 |                    |                 |                |                  | K    | 147.112804         | 74.060040         | <b>130.086255</b> | 65.546765         |                   |                   | 1  |

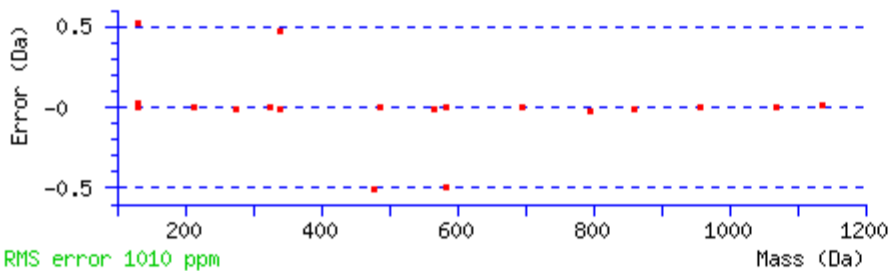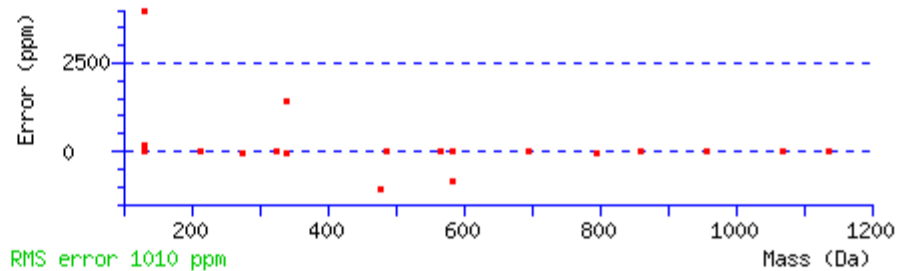

NCBI BLAST search of [DPIPYP L P P L E K](#)

(Parameters: blastp, nr protein database, expect=20000, no filter, PAM30)

Other BLAST [web gateways](#)

## All matches to this query

| Score | Mr(calc):   | Delta     | Sequence                           |
|-------|-------------|-----------|------------------------------------|
| 38.0  | 1280.701614 | 0.003634  | <a href="#">DPIPYP L P P L E K</a> |
| 4.4   | 1280.697601 | 0.007647  | <a href="#">DPINVEGL L P S K</a>   |
| 1.6   | 1280.697617 | 0.007631  | <a href="#">DLPLAPVPTSGAK</a>      |
| 1.6   | 1280.697617 | 0.007631  | <a href="#">DLPLAPVPTSGAK</a>      |
| 1.3   | 1280.708832 | -0.003584 | <a href="#">EDINSHVIKVK</a>        |

Mascot: <http://www.matrixscience.com/>



# Mascot Search Results

## Peptide View

MS/MS Fragmentation of **LYSILQGDSPTK**

Found in **SRI140\_HUMAN**, U2 snRNP-associated SURP motif-containing protein OS=Homo sapiens GN=U2SURP PE=1 SV=2

Match to Query 35578: 1320.685748 from(661.350150,2+) rtinseconds(2411) index(29299)

Title: Locus:1.1.1.2356.40

Data file 2011-11-14 - TFD - EP 7-1.mgf

Click mouse within plot area to zoom in by factor of two about that point

Or, Plot from  to  Da

Label all possible matches  Label matches used for scoring

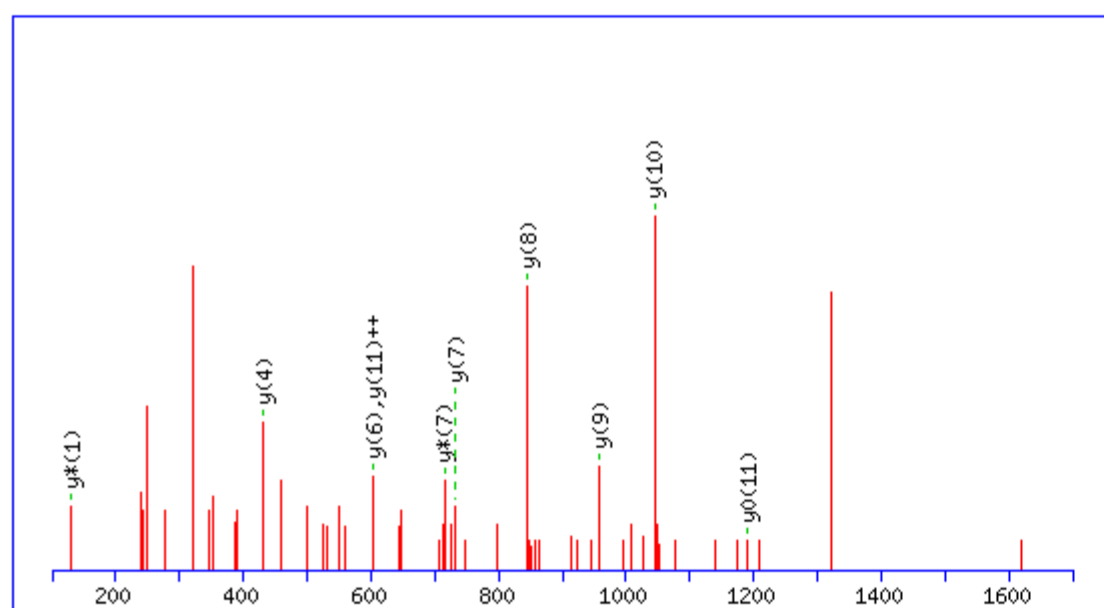

Monoisotopic mass of neutral peptide  $M_r(\text{calc})$ : 1320.692520

Fixed modifications: Propionamide (C) (apply to specified residues or termini only)

Ions Score: 49 Expect: 3.2e-005

Matches : 10/116 fragment ions using 11 most intense peaks [\(help\)](#)

| #  | b           | b <sup>++</sup> | b <sup>+</sup> | b <sup>+++</sup> | b <sup>0</sup> | b <sup>0++</sup> | Seq. | y           | y <sup>++</sup> | y <sup>+</sup> | y <sup>+++</sup> | y <sup>0</sup> | y <sup>0++</sup> | #  |
|----|-------------|-----------------|----------------|------------------|----------------|------------------|------|-------------|-----------------|----------------|------------------|----------------|------------------|----|
| 1  | 114.091340  | 57.549308       |                |                  |                |                  | L    |             |                 |                |                  |                |                  | 12 |
| 2  | 277.154669  | 139.080973      |                |                  |                |                  | Y    | 1208.615745 | 604.811511      | 1191.589196    | 596.298236       | 1190.605180    | 595.806228       | 11 |
| 3  | 364.186697  | 182.596987      |                |                  | 346.176132     | 173.591704       | S    | 1045.552416 | 523.279846      | 1028.525867    | 514.766572       | 1027.541851    | 514.274564       | 10 |
| 4  | 477.270761  | 239.139019      |                |                  | 459.260196     | 230.133736       | I    | 958.520388  | 479.763832      | 941.493839     | 471.250558       | 940.509823     | 470.758550       | 9  |
| 5  | 590.354825  | 295.681051      |                |                  | 572.344260     | 286.675768       | L    | 845.436324  | 423.221800      | 828.409775     | 414.708526       | 827.425759     | 414.216518       | 8  |
| 6  | 718.413403  | 359.710340      | 701.386854     | 351.197065       | 700.402838     | 350.705057       | Q    | 732.352260  | 366.679768      | 715.325711     | 358.166494       | 714.341695     | 357.674486       | 7  |
| 7  | 775.434867  | 388.221072      | 758.408318     | 379.707797       | 757.424302     | 379.215789       | G    | 604.293682  | 302.650479      | 587.267133     | 294.137205       | 586.283117     | 293.645197       | 6  |
| 8  | 890.461810  | 445.734543      | 873.435261     | 437.221269       | 872.451245     | 436.729261       | D    | 547.272218  | 274.139747      | 530.245669     | 265.626473       | 529.261653     | 265.134465       | 5  |
| 9  | 977.493838  | 489.250557      | 960.467289     | 480.737283       | 959.483273     | 480.245275       | S    | 432.245275  | 216.626275      | 415.218726     | 208.113001       | 414.234710     | 207.620993       | 4  |
| 10 | 1074.546602 | 537.776939      | 1057.520053    | 529.263665       | 1056.536037    | 528.771657       | P    | 345.213247  | 173.110262      | 328.186698     | 164.596987       | 327.202682     | 164.104979       | 3  |
| 11 | 1175.594281 | 588.300779      | 1158.567732    | 579.787504       | 1157.583716    | 579.295496       | T    | 248.160483  | 124.583879      | 231.133934     | 116.070605       | 230.149918     | 115.578597       | 2  |
| 12 |             |                 |                |                  |                |                  | K    | 147.112804  | 74.060040       | 130.086255     | 65.546765        |                |                  | 1  |

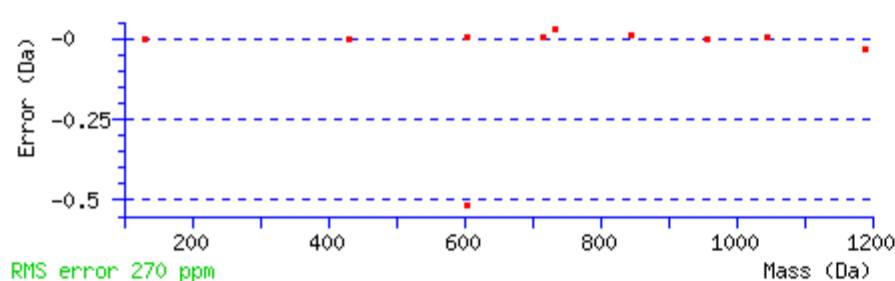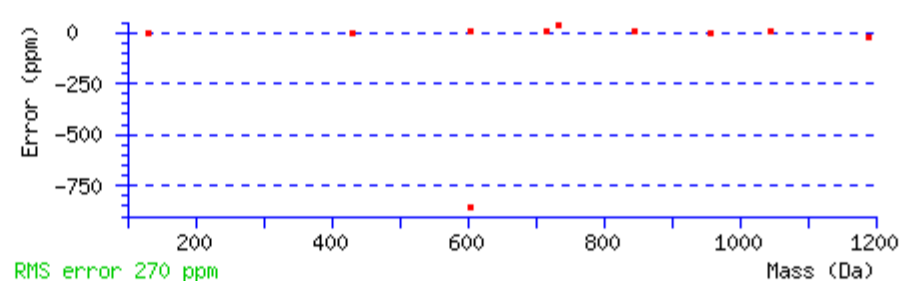

NCBI BLAST search of **LYSILQGDSPTK**

(Parameters: blastp, nr protein database, expect=20000, no filter, PAM30)

Other BLAST [web gateways](#)

All matches to this query

| Score | $M_r(\text{calc})$ : | Delta     | Sequence                      |
|-------|----------------------|-----------|-------------------------------|
| 49.5  | 1320.692520          | -0.006772 | <a href="#">LYSILQGDSPTK</a>  |
| 1.6   | 1320.674591          | 0.011157  | <a href="#">SSARSTQGTTGIR</a> |

Mascot: <http://www.matrixscience.com/>

# MASCOT SCIENCE Mascot Search Results

## Peptide View

MS/MS Fragmentation of **LQALAGVNPQLQNPEVR**

Found in **UBQL1\_HUMAN**, Ubiquilin-1 OS=Homo sapiens GN=UBQLN1 PE=1 SV=2

Match to Query 997929: 1845.989948 from(924.002250,2+) rtinseconds(2563) index(522673)

Title: Locus:1.1.1.1310.48

Data file C:\Program Files (x86)\Matrix Science\Mascot Daemon\mgf3 TFD - Epitel - R2\mascot\_daemon\_merge.mgf

Click mouse within plot area to zoom in by factor of two about that point

Or, Plot from  to  Da

Label all possible matches  Label matches used for scoring

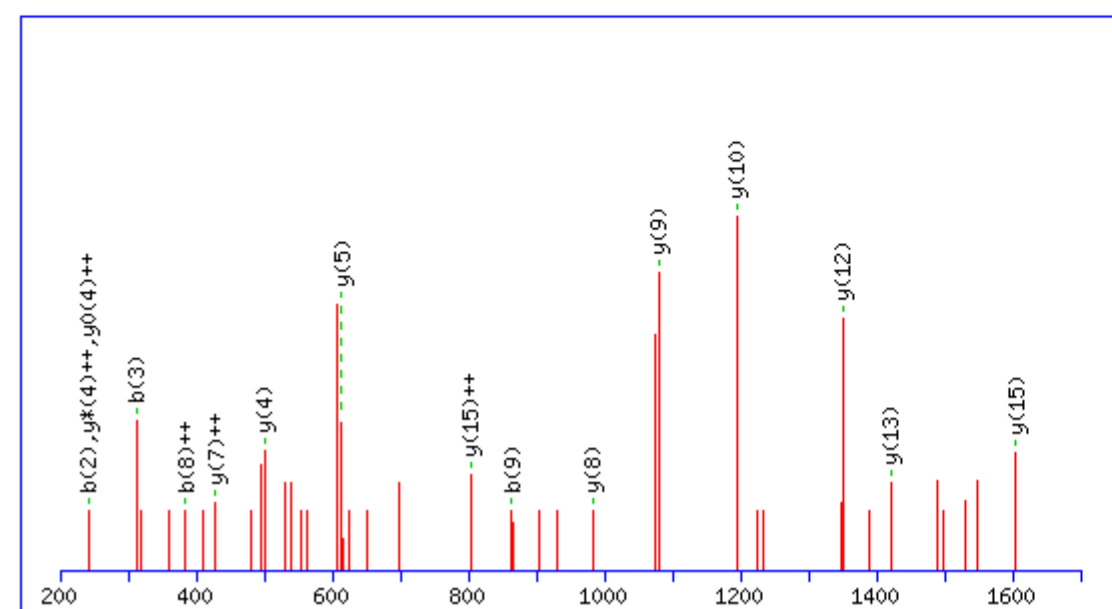

Monoisotopic mass of neutral peptide Mr(calc): 1846.006073

Fixed modifications: Carbamidomethyl (C) (apply to specified residues or termini only)

Ions Score: 46 Expect: 0.00017

Matches : 16/158 fragment ions using 24 most intense peaks [\(help\)](#)

| #  | b                 | b <sup>++</sup>   | b <sup>+</sup> | b <sup>*++</sup> | b <sup>0</sup> | b <sup>0++</sup> | Seq. | y                  | y <sup>++</sup>   | y <sup>+</sup> | y <sup>*++</sup>  | y <sup>0</sup> | y <sup>0++</sup>  | #  |
|----|-------------------|-------------------|----------------|------------------|----------------|------------------|------|--------------------|-------------------|----------------|-------------------|----------------|-------------------|----|
| 1  | 114.091340        | 57.549308         |                |                  |                |                  | L    |                    |                   |                |                   |                |                   | 17 |
| 2  | <b>242.149918</b> | 121.578597        | 225.123369     | 113.065323       |                |                  | Q    | 1733.929309        | 867.468293        | 1716.902760    | 858.955018        | 1715.918744    | 858.463010        | 16 |
| 3  | <b>313.187032</b> | 157.097154        | 296.160483     | 148.583879       |                |                  | A    | <b>1605.870731</b> | <b>803.439004</b> | 1588.844182    | 794.925729        | 1587.860166    | 794.433721        | 15 |
| 4  | 426.271096        | 213.639186        | 409.244547     | 205.125912       |                |                  | L    | 1534.833617        | 767.920447        | 1517.807068    | 759.407172        | 1516.823052    | 758.915164        | 14 |
| 5  | 497.308210        | 249.157743        | 480.281661     | 240.644468       |                |                  | A    | <b>1421.749553</b> | 711.378415        | 1404.723004    | 702.865140        | 1403.738988    | 702.373132        | 13 |
| 6  | 554.329674        | 277.668475        | 537.303125     | 269.155201       |                |                  | G    | <b>1350.712439</b> | 675.859858        | 1333.685890    | 667.346583        | 1332.701874    | 666.854575        | 12 |
| 7  | 653.398088        | 327.202682        | 636.371539     | 318.689408       |                |                  | V    | 1293.690975        | 647.349126        | 1276.664426    | 638.835851        | 1275.680410    | 638.343843        | 11 |
| 8  | 767.441015        | <b>384.224146</b> | 750.414466     | 375.710871       |                |                  | N    | <b>1194.622561</b> | 597.814919        | 1177.596012    | 589.301644        | 1176.611996    | 588.809636        | 10 |
| 9  | <b>864.493779</b> | 432.750528        | 847.467230     | 424.237253       |                |                  | P    | <b>1080.579634</b> | 540.793455        | 1063.553085    | 532.280181        | 1062.569069    | 531.788173        | 9  |
| 10 | 992.552357        | 496.779817        | 975.525808     | 488.266542       |                |                  | Q    | <b>983.526870</b>  | 492.267073        | 966.500321     | 483.753799        | 965.516305     | 483.261791        | 8  |
| 11 | 1105.636421       | 553.321848        | 1088.609872    | 544.808574       |                |                  | L    | 855.468292         | <b>428.237784</b> | 838.441743     | 419.724510        | 837.457727     | 419.232502        | 7  |
| 12 | 1233.694999       | 617.351138        | 1216.668450    | 608.837863       |                |                  | Q    | 742.384228         | 371.695752        | 725.357679     | 363.182478        | 724.373663     | 362.690470        | 6  |
| 13 | 1347.737926       | 674.372601        | 1330.711377    | 665.859327       |                |                  | N    | <b>614.325650</b>  | 307.666463        | 597.299101     | 299.153189        | 596.315085     | 298.661181        | 5  |
| 14 | 1444.790690       | 722.898983        | 1427.764141    | 714.385709       |                |                  | P    | <b>500.282723</b>  | 250.645000        | 483.256174     | <b>242.131725</b> | 482.272158     | <b>241.639717</b> | 4  |
| 15 | 1573.833283       | 787.420280        | 1556.806734    | 778.907005       | 1555.822718    | 778.414997       | E    | 403.229959         | 202.118618        | 386.203410     | 193.605343        | 385.219394     | 193.113335        | 3  |
| 16 | 1672.901697       | 836.954487        | 1655.875148    | 828.441212       | 1654.891132    | 827.949204       | V    | 274.187366         | 137.597321        | 257.160817     | 129.084047        |                |                   | 2  |
| 17 |                   |                   |                |                  |                |                  | R    | 175.118952         | 88.063114         | 158.092403     | 79.549839         |                |                   | 1  |

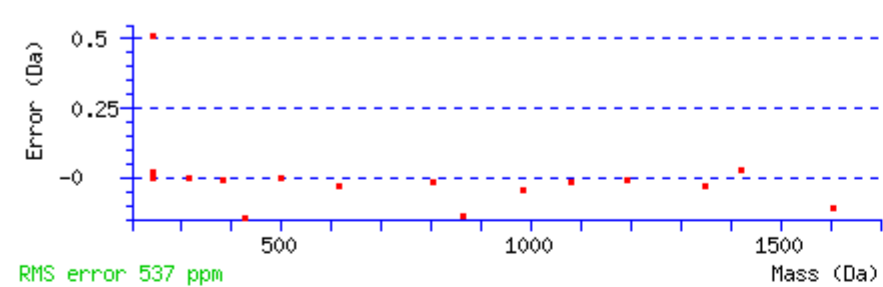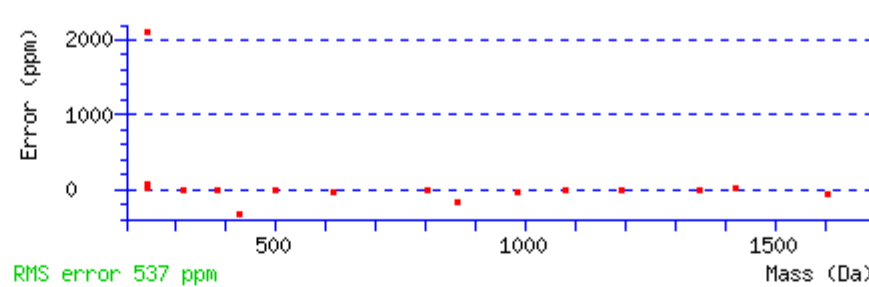

NCBI BLAST search of [LQALAGVNPQLQNPEVR](#)

(Parameters: blastp, nr protein database, expect=20000, no filter, PAM30)

Other BLAST [web gateways](#)

## All matches to this query

| Score | Mr(calc):   | Delta     | Sequence                          |
|-------|-------------|-----------|-----------------------------------|
| 46.2  | 1846.006073 | -0.016125 | <a href="#">LQALAGVNPQLQNPEVR</a> |

Mascot: <http://www.matrixscience.com/>

**Peptide View**

MS/MS Fragmentation of **GPAAAQGSAAAPAEPK**  
 Found in **UBQL2\_HUMAN**, Ubiquilin-2 OS=Homo sapiens GN=UBQLN2 PE=1 SV=2

Match to Query 39409: 1392.701148 from(697.357850,2+) rtinseconds(1066) index(1504)  
 Title: Locus:1.1.1.2052.42  
 Data file 2011-11-12 - TFD - EP 5-2.mgf

Click mouse within plot area to zoom in by factor of two about that point  
 Or, Plot from  to  Da   
 Label all possible matches  Label matches used for scoring

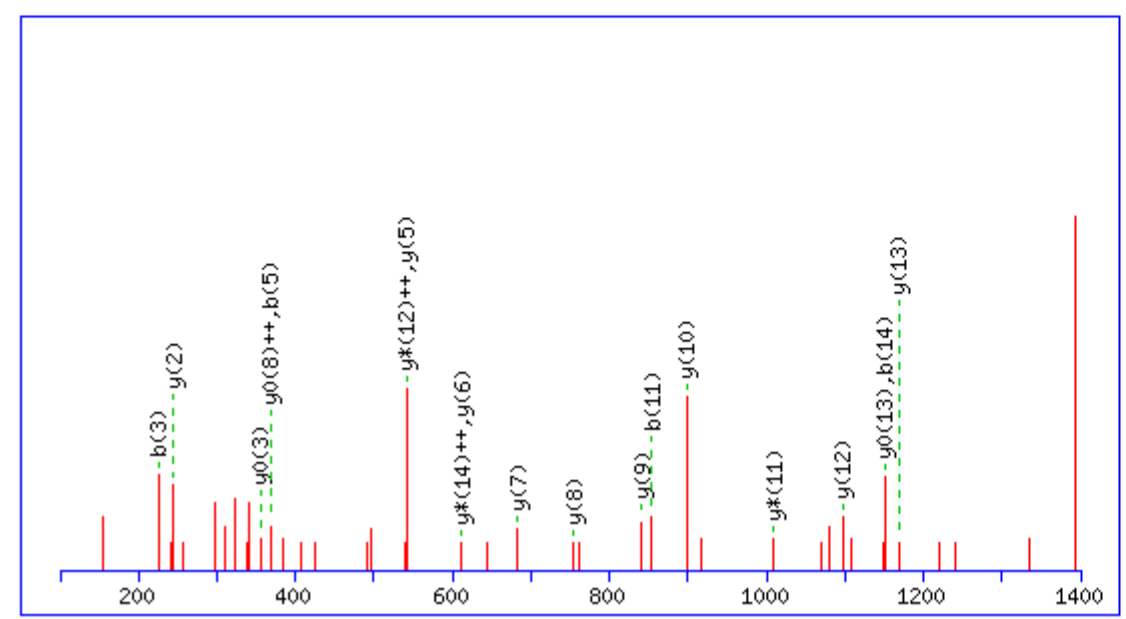

Monoisotopic mass of neutral peptide  $M_r(\text{calc})$ : 1392.699707  
 Fixed modifications: Propionamide (C) (apply to specified residues or termini only)  
 Ions Score: 67 Expect: 5.9e-007  
 Matches : 19/152 fragment ions using 22 most intense peaks ([help](#))

| #  | b                  | b <sup>++</sup> | b <sup>+</sup> | b <sup>*++</sup> | b <sup>0</sup> | b <sup>0++</sup> | Seq. | y                  | y <sup>++</sup> | y <sup>+</sup>     | y <sup>*++</sup>  | y <sup>0</sup>     | y <sup>0++</sup>  | #  |
|----|--------------------|-----------------|----------------|------------------|----------------|------------------|------|--------------------|-----------------|--------------------|-------------------|--------------------|-------------------|----|
| 1  | 58.028740          | 29.518008       |                |                  |                |                  | G    |                    |                 |                    |                   |                    |                   | 16 |
| 2  | 155.081504         | 78.044390       |                |                  |                |                  | P    | 1336.685557        | 668.846417      | 1319.659008        | 660.333142        | 1318.674992        | 659.841134        | 15 |
| 3  | <b>226.118618</b>  | 113.562947      |                |                  |                |                  | A    | 1239.632793        | 620.320035      | 1222.606244        | <b>611.806760</b> | 1221.622228        | 611.314752        | 14 |
| 4  | 297.155732         | 149.081504      |                |                  |                |                  | A    | <b>1168.595679</b> | 584.801478      | 1151.569130        | 576.288203        | <b>1150.585114</b> | 575.796195        | 13 |
| 5  | <b>368.192846</b>  | 184.600061      |                |                  |                |                  | A    | <b>1097.558565</b> | 549.282921      | 1080.532016        | <b>540.769646</b> | 1079.548000        | 540.277638        | 12 |
| 6  | 496.251424         | 248.629350      | 479.224875     | 240.116075       |                |                  | Q    | 1026.521451        | 513.764364      | <b>1009.494902</b> | 505.251089        | 1008.510886        | 504.759081        | 11 |
| 7  | 553.272888         | 277.140082      | 536.246339     | 268.626808       |                |                  | G    | <b>898.462873</b>  | 449.735075      | 881.436324         | 441.221800        | 880.452308         | 440.729792        | 10 |
| 8  | 640.304916         | 320.656096      | 623.278367     | 312.142822       | 622.294351     | 311.650814       | S    | <b>841.441409</b>  | 421.224342      | 824.414860         | 412.711068        | 823.430844         | 412.219060        | 9  |
| 9  | 711.342030         | 356.174653      | 694.315481     | 347.661379       | 693.331465     | 347.169371       | A    | <b>754.409381</b>  | 377.708328      | 737.382832         | 369.195054        | 736.398816         | <b>368.703046</b> | 8  |
| 10 | 782.379144         | 391.693210      | 765.352595     | 383.179936       | 764.368579     | 382.687928       | A    | <b>683.372267</b>  | 342.189772      | 666.345718         | 333.676497        | 665.361702         | 333.184489        | 7  |
| 11 | <b>853.416258</b>  | 427.211767      | 836.389709     | 418.698492       | 835.405693     | 418.206484       | A    | <b>612.335153</b>  | 306.671215      | 595.308604         | 298.157940        | 594.324588         | 297.665932        | 6  |
| 12 | 950.469022         | 475.738149      | 933.442473     | 467.224875       | 932.458457     | 466.732867       | P    | <b>541.298039</b>  | 271.152658      | 524.271490         | 262.639383        | 523.287474         | 262.147375        | 5  |
| 13 | 1021.506136        | 511.256706      | 1004.479587    | 502.743431       | 1003.495571    | 502.251423       | A    | 444.245275         | 222.626275      | 427.218726         | 214.113001        | 426.234710         | 213.620993        | 4  |
| 14 | <b>1150.548729</b> | 575.778002      | 1133.522180    | 567.264728       | 1132.538164    | 566.772720       | E    | 373.208161         | 187.107718      | 356.181612         | 178.594444        | <b>355.197596</b>  | 178.102436        | 3  |
| 15 | 1247.601493        | 624.304384      | 1230.574944    | 615.791110       | 1229.590928    | 615.299102       | P    | <b>244.165568</b>  | 122.586422      | 227.139019         | 114.073148        |                    |                   | 2  |
| 16 |                    |                 |                |                  |                |                  | K    | 147.112804         | 74.060040       | 130.086255         | 65.546765         |                    |                   | 1  |

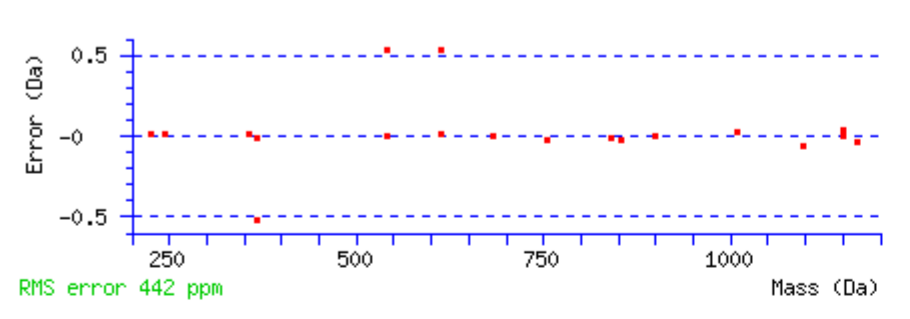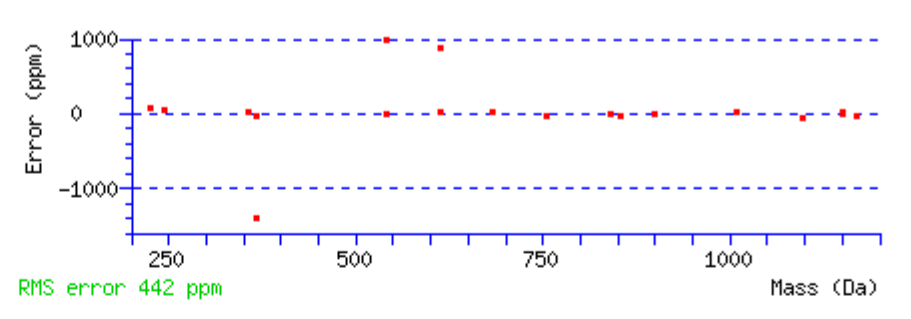

NCBI BLAST search of **GPAAAQGSAAAPAEPK**  
 (Parameters: blastp, nr protein database, expect=20000, no filter, PAM30)  
 Other BLAST [web gateways](#)

**All matches to this query**

| Score | $M_r(\text{calc})$ : | Delta    | Sequence                         |
|-------|----------------------|----------|----------------------------------|
| 67.0  | 1392.699707          | 0.001441 | <a href="#">GPAAAQGSAAAPAEPK</a> |
| 0.6   | 1392.688507          | 0.012641 | <a href="#">LPSLSGSDGIPYR</a>    |

# MASCOT Search Results

## Peptide View

MS/MS Fragmentation of **ASAQYITAALR**

Found in **UBP14\_HUMAN**, Ubiquitin carboxyl-terminal hydrolase 14 OS=Homo sapiens GN=USP14 PE=1 SV=3

Match to Query 19356: 1163.626128 from(582.820340,2+) rtinseconds(2131) index(25180)

Title: Locus:1.1.1.1193.21

Data file 2012-01-27 - TFD - Epitel - IEC - 10ul - 2.mgf

Click mouse within plot area to zoom in by factor of two about that point

Or, Plot from  to  Da

Label all possible matches  Label matches used for scoring

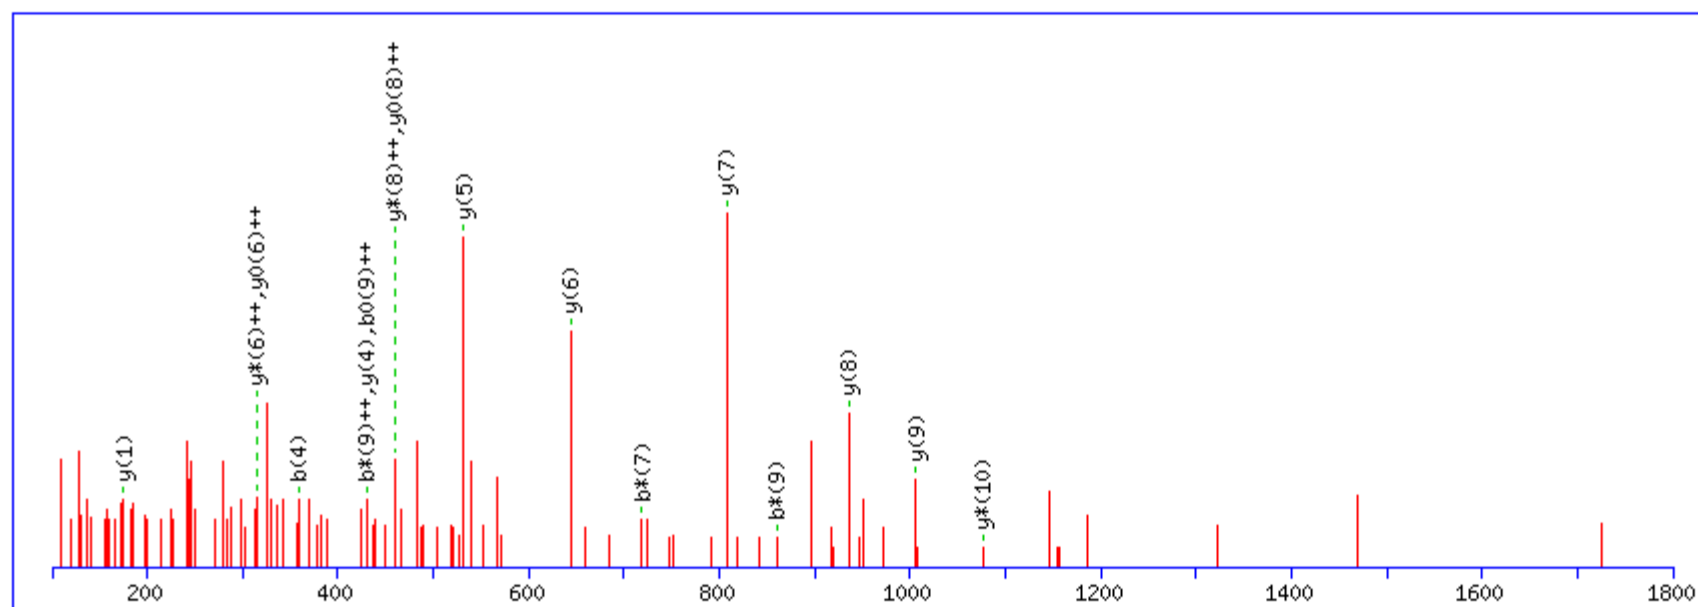

Monoisotopic mass of neutral peptide Mr(calc): 1163.629837

Fixed modifications: Carbamidomethyl (C) (apply to specified residues or termini only)

Ions Score: 31 Expect: 0.0053

Matches : 17/104 fragment ions using 31 most intense peaks [\(help\)](#)

| #  | b          | b <sup>++</sup> | b <sup>*</sup> | b <sup>*++</sup> | b <sup>0</sup> | b <sup>0++</sup> | Seq. | y           | y <sup>++</sup> | y <sup>*</sup> | y <sup>*++</sup> | y <sup>0</sup> | y <sup>0++</sup> | #  |
|----|------------|-----------------|----------------|------------------|----------------|------------------|------|-------------|-----------------|----------------|------------------|----------------|------------------|----|
| 1  | 72.044390  | 36.525833       |                |                  |                |                  | A    |             |                 |                |                  |                |                  | 11 |
| 2  | 159.076418 | 80.041847       |                |                  | 141.065853     | 71.036564        | S    | 1093.600036 | 547.303656      | 1076.573487    | 538.790382       | 1075.589471    | 538.298374       | 10 |
| 3  | 230.113532 | 115.560404      |                |                  | 212.102967     | 106.555121       | A    | 1006.568008 | 503.787642      | 989.541459     | 495.274367       | 988.557443     | 494.782359       | 9  |
| 4  | 358.172110 | 179.589693      | 341.145561     | 171.076419       | 340.161545     | 170.584411       | Q    | 935.530894  | 468.269085      | 918.504345     | 459.755811       | 917.520329     | 459.263803       | 8  |
| 5  | 521.235439 | 261.121358      | 504.208890     | 252.608083       | 503.224874     | 252.116075       | Y    | 807.472316  | 404.239796      | 790.445767     | 395.726521       | 789.461751     | 395.234513       | 7  |
| 6  | 634.319503 | 317.663390      | 617.292954     | 309.150115       | 616.308938     | 308.658107       | I    | 644.408987  | 322.708132      | 627.382438     | 314.194857       | 626.398422     | 313.702849       | 6  |
| 7  | 735.367182 | 368.187229      | 718.340633     | 359.673955       | 717.356617     | 359.181947       | T    | 531.324923  | 266.166100      | 514.298374     | 257.652825       | 513.314358     | 257.160817       | 5  |
| 8  | 806.404296 | 403.705786      | 789.377747     | 395.192512       | 788.393731     | 394.700504       | A    | 430.277244  | 215.642260      | 413.250695     | 207.128985       |                |                  | 4  |
| 9  | 877.441410 | 439.224343      | 860.414861     | 430.711069       | 859.430845     | 430.219061       | A    | 359.240130  | 180.123703      | 342.213581     | 171.610428       |                |                  | 3  |
| 10 | 990.525474 | 495.766375      | 973.498925     | 487.253101       | 972.514909     | 486.761093       | L    | 288.203016  | 144.605146      | 271.176467     | 136.091871       |                |                  | 2  |
| 11 |            |                 |                |                  |                |                  | R    | 175.118952  | 88.063114       | 158.092403     | 79.549839        |                |                  | 1  |

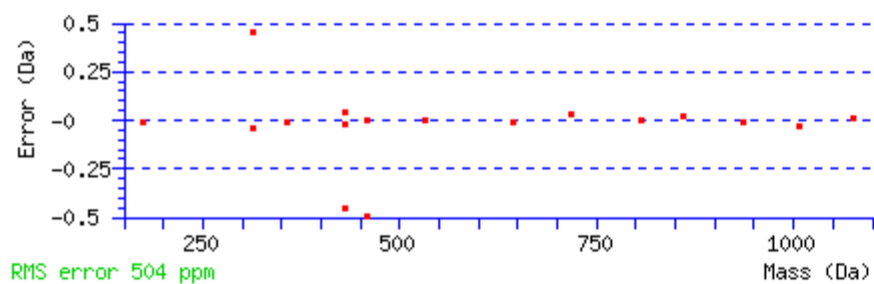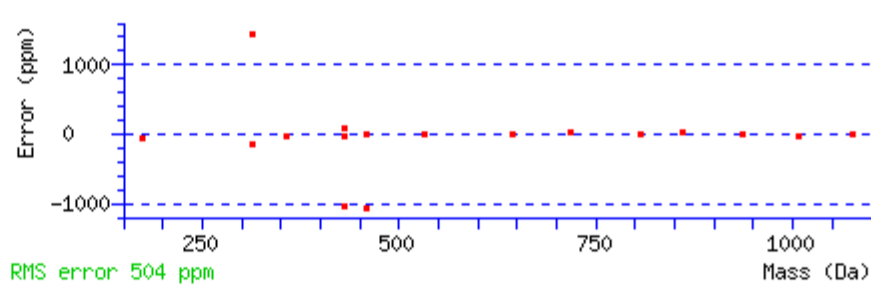

NCBI BLAST search of [ASAQYITAALR](#)

(Parameters: blastp, nr protein database, expect=20000, no filter, PAM30)

Other BLAST [web gateways](#)

All matches to this query

| Score | Mr(calc):   | Delta     | Sequence                    |
|-------|-------------|-----------|-----------------------------|
| 30.9  | 1163.629837 | -0.003709 | <a href="#">ASAQYITAALR</a> |
| 6.3   | 1163.619995 | 0.006133  | <a href="#">VWQVGPHVAR</a>  |
| 0.8   | 1163.629868 | -0.003740 | <a href="#">GLSSLQPPPPR</a> |

# **MASCOT** Mascot Search Results

## Peptide View

MS/MS Fragmentation of **LELGRGR**

Found in **UBP21\_HUMAN**, Ubiquitin carboxyl-terminal hydrolase 21 OS=Homo sapiens GN=USP21 PE=1 SV=1

Match to Query 143: 799.458448 from(400.736500,2+) rtinseconds(1177) index(6511)

Title: Locus:1.1.1.1882.2

Data file 2011-11-10 - TFD - EP 3-1.mgf

Click mouse within plot area to zoom in by factor of two about that point

Or, Plot from  to  Da

Label all possible matches  Label matches used for scoring

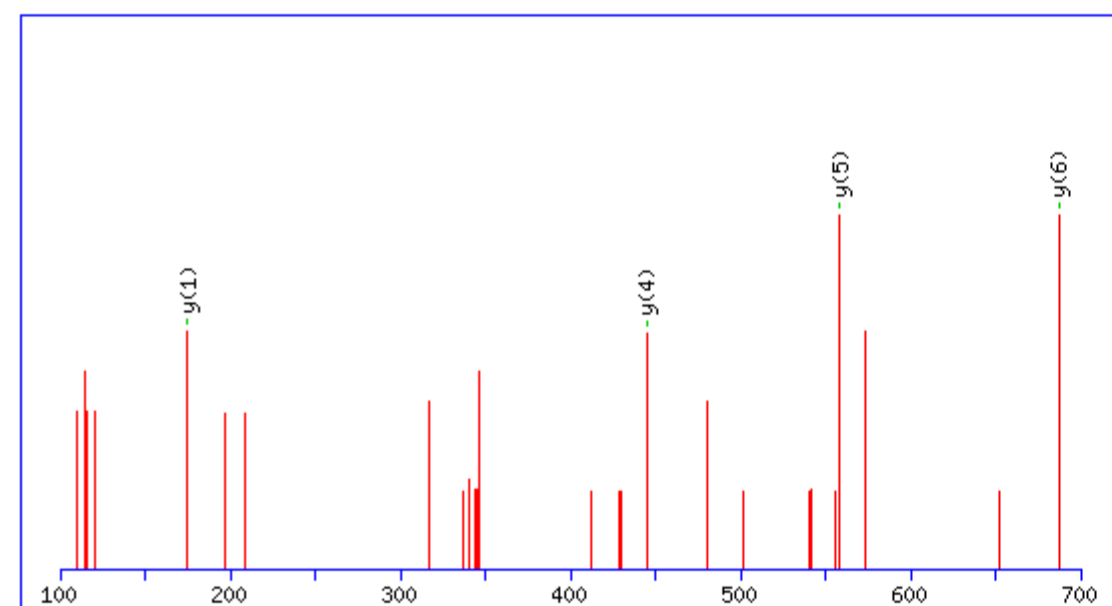

Monoisotopic mass of neutral peptide Mr(calc): 799.466415

Fixed modifications: Propionamide (C) (apply to specified residues or termini only)

Ions Score: 33 Expect: 0.011

Matches : 4/52 fragment ions using 5 most intense peaks ([help](#))

| # | b          | b <sup>++</sup> | b <sup>*</sup> | b <sup>*++</sup> | b <sup>0</sup> | b <sup>0++</sup> | Seq. | y                 | y <sup>++</sup> | y <sup>*</sup> | y <sup>*++</sup> | y <sup>0</sup> | y <sup>0++</sup> | # |
|---|------------|-----------------|----------------|------------------|----------------|------------------|------|-------------------|-----------------|----------------|------------------|----------------|------------------|---|
| 1 | 114.091340 | 57.549308       |                |                  |                |                  | L    |                   |                 |                |                  |                |                  | 7 |
| 2 | 243.133933 | 122.070605      |                |                  | 225.123368     | 113.065322       | E    | <b>687.389648</b> | 344.198462      | 670.363099     | 335.685188       | 669.379083     | 335.193180       | 6 |
| 3 | 356.217997 | 178.612637      |                |                  | 338.207432     | 169.607354       | L    | <b>558.347055</b> | 279.677166      | 541.320506     | 271.163891       |                |                  | 5 |
| 4 | 413.239461 | 207.123369      |                |                  | 395.228896     | 198.118086       | G    | <b>445.262991</b> | 223.135134      | 428.236442     | 214.621859       |                |                  | 4 |
| 5 | 569.340572 | 285.173924      | 552.314023     | 276.660650       | 551.330007     | 276.168642       | R    | 388.241527        | 194.624402      | 371.214978     | 186.111127       |                |                  | 3 |
| 6 | 626.362036 | 313.684656      | 609.335487     | 305.171382       | 608.351471     | 304.679374       | G    | 232.140416        | 116.573846      | 215.113867     | 108.060572       |                |                  | 2 |
| 7 |            |                 |                |                  |                |                  | R    | <b>175.118952</b> | 88.063114       | 158.092403     | 79.549840        |                |                  | 1 |

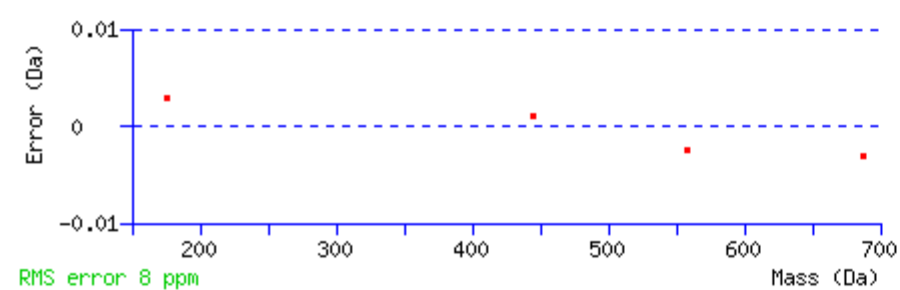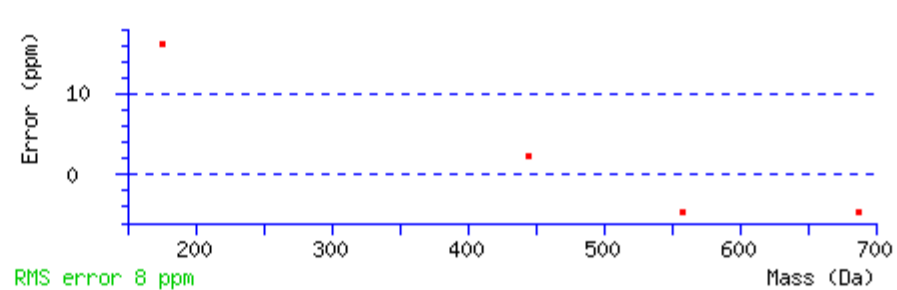

NCBI BLAST search of **LELGRGR**

(Parameters: blastp, nr protein database, expect=20000, no filter, PAM30)

Other BLAST [web gateways](#)

All matches to this query

| Score | Mr(calc):  | Delta     | Sequence                |
|-------|------------|-----------|-------------------------|
| 32.5  | 799.466415 | -0.007967 | <a href="#">LELGRGR</a> |
| 31.9  | 799.455185 | 0.003263  | <a href="#">IIEVNGR</a> |
| 31.9  | 799.455185 | 0.003263  | <a href="#">ILEVNGR</a> |
| 22.7  | 799.455170 | 0.003278  | <a href="#">LEQLAAR</a> |
| 16.7  | 799.466400 | -0.007952 | <a href="#">IENIRR</a>  |
| 16.7  | 799.466415 | -0.007967 | <a href="#">IEQVRR</a>  |
| 16.7  | 799.455170 | 0.003278  | <a href="#">LEAAIQR</a> |
| 16.7  | 799.466400 | -0.007952 | <a href="#">LENLRR</a>  |
| 16.7  | 799.466415 | -0.007967 | <a href="#">LERAVGR</a> |
| 16.7  | 799.466400 | -0.007952 | <a href="#">LERINR</a>  |

# MASCOT Search Results

## Peptide View

MS/MS Fragmentation of **AAYVLFYQR**

Found in **UBP11\_HUMAN**, Ubiquitin carboxyl-terminal hydrolase 11 OS=Homo sapiens GN=USP11 PE=1 SV=3

Match to Query 25010: 1129.591688 from(565.803120,2+) rtinseconds(2752) index(36342)

Title: Locus:1.1.1.2451.19

Data file 2011-11-14 - TFD - EP 8-1.mgf

Click mouse within plot area to zoom in by factor of two about that point

Or, Plot from  to  Da

Label all possible matches  Label matches used for scoring

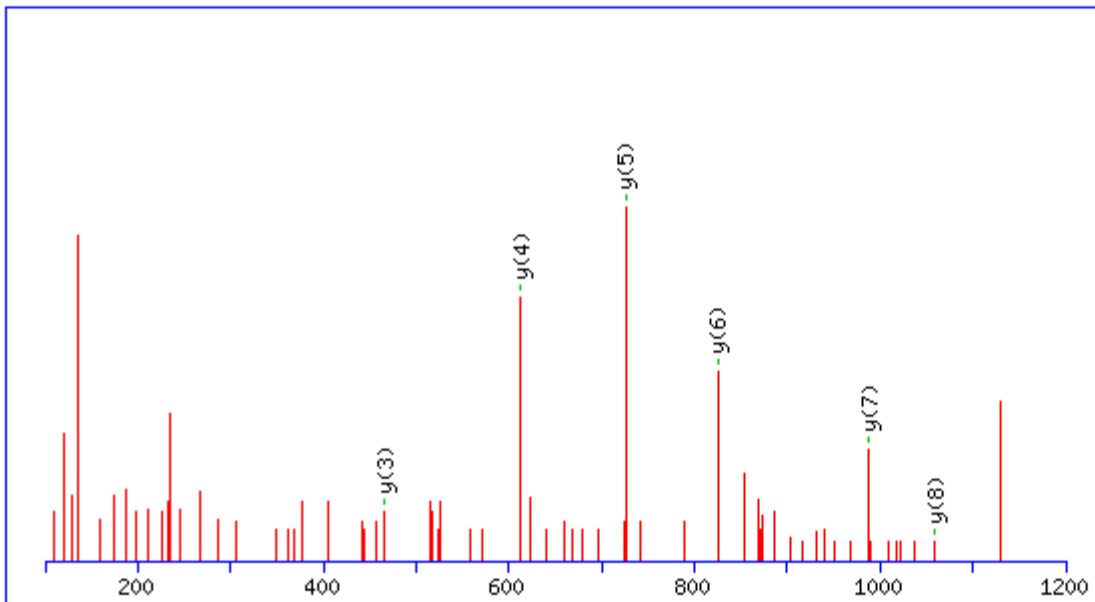

Monoisotopic mass of neutral peptide Mr(calc): 1129.592010

Fixed modifications: Propionamide (C) (apply to specified residues or termini only)

Ions Score: 41 Expect: 0.0011

Matches : 6/50 fragment ions using 10 most intense peaks [\(help\)](#)

| # | b          | b <sup>++</sup> | b <sup>*</sup> | b <sup>*++</sup> | Seq. | y                  | y <sup>++</sup> | y <sup>*</sup> | y <sup>*++</sup> | # |
|---|------------|-----------------|----------------|------------------|------|--------------------|-----------------|----------------|------------------|---|
| 1 | 72.044390  | 36.525833       |                |                  | A    |                    |                 |                |                  | 9 |
| 2 | 143.081504 | 72.044390       |                |                  | A    | <b>1059.562194</b> | 530.284735      | 1042.535645    | 521.771461       | 8 |
| 3 | 306.144833 | 153.576055      |                |                  | Y    | <b>988.525080</b>  | 494.766178      | 971.498531     | 486.252904       | 7 |
| 4 | 405.213247 | 203.110262      |                |                  | V    | <b>825.461751</b>  | 413.234514      | 808.435202     | 404.721239       | 6 |
| 5 | 518.297311 | 259.652294      |                |                  | L    | <b>726.393337</b>  | 363.700307      | 709.366788     | 355.187032       | 5 |
| 6 | 665.365725 | 333.186501      |                |                  | F    | <b>613.309273</b>  | 307.158275      | 596.282724     | 298.645000       | 4 |
| 7 | 828.429054 | 414.718165      |                |                  | Y    | <b>466.240859</b>  | 233.624068      | 449.214310     | 225.110793       | 3 |
| 8 | 956.487632 | 478.747454      | 939.461083     | 470.234179       | Q    | 303.177530         | 152.092403      | 286.150981     | 143.579129       | 2 |
| 9 |            |                 |                |                  | R    | 175.118952         | 88.063114       | 158.092403     | 79.549840        | 1 |

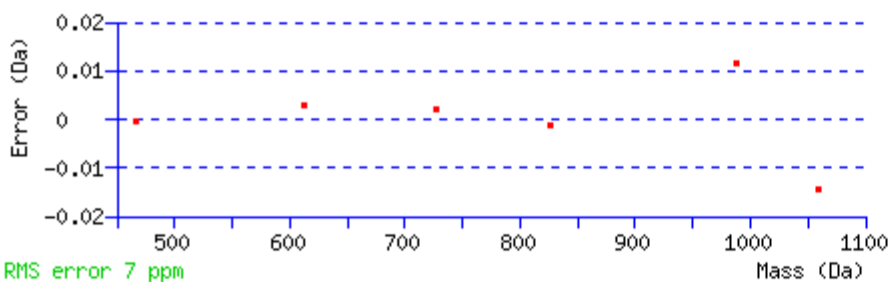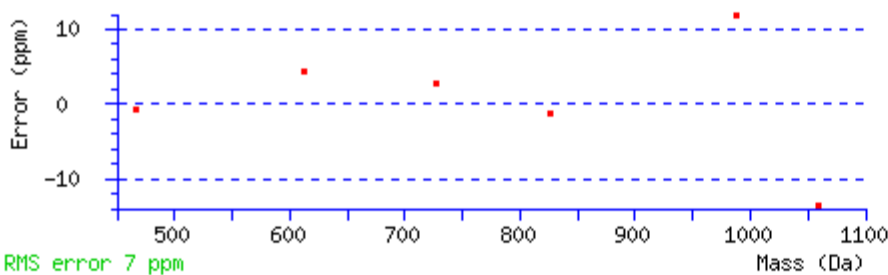

NCBI BLAST search of [AAYVLFYQR](#)

(Parameters: blastp, nr protein database, expect=20000, no filter, PAM30)

Other BLAST [web gateways](#)

All matches to this query

| Score | Mr(calc):   | Delta     | Sequence                  |
|-------|-------------|-----------|---------------------------|
| 41.3  | 1129.592010 | -0.000322 | <a href="#">AAYVLFYQR</a> |

# MASCOT SCIENCE Mascot Search Results

## Peptide View

MS/MS Fragmentation of **DAQSSSPAADNLR**

Found in **UBE4A\_HUMAN**, Ubiquitin conjugation factor E4 A OS=Homo sapiens GN=UBE4A PE=1 SV=2

Match to Query 802274: 1458.671928 from(730.343240,2+) rtinseconds(1233) index(248213)

Title: Locus:1.1.1.912.47

Data file C:\Program Files (x86)\Matrix Science\Mascot Daemon\mgf3 TFD - Epitel - R2\mascot\_daemon\_merge.mgf

Click mouse within plot area to zoom in by factor of two about that point

Or, Plot from  to  Da

Label all possible matches  Label matches used for scoring

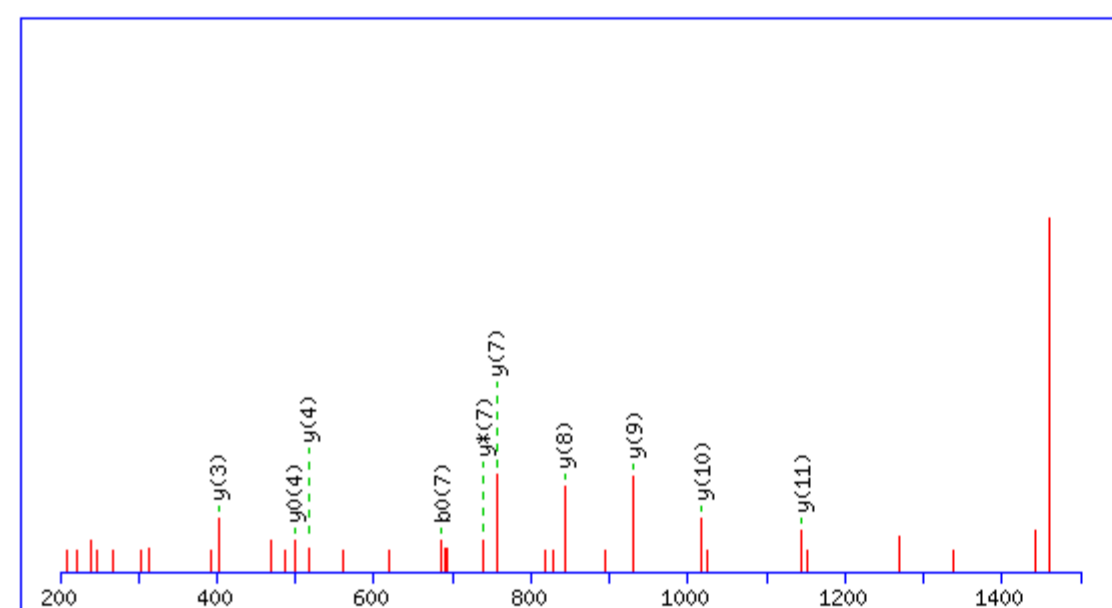

Monoisotopic mass of neutral peptide Mr(calc): 1458.669876

Fixed modifications: Carbamidomethyl (C) (apply to specified residues or termini only)

Ions Score: 36 Expect: 0.00055

Matches : 10/146 fragment ions using 23 most intense peaks ([help](#))

| #  | b           | b <sup>++</sup> | b <sup>*</sup> | b <sup>*++</sup> | b <sup>0</sup>    | b <sup>0++</sup> | Seq. | y                  | y <sup>++</sup> | y <sup>*</sup>    | y <sup>*++</sup> | y <sup>0</sup>    | y <sup>0++</sup> | #  |
|----|-------------|-----------------|----------------|------------------|-------------------|------------------|------|--------------------|-----------------|-------------------|------------------|-------------------|------------------|----|
| 1  | 116.034219  | 58.520748       |                |                  | 98.023654         | 49.515465        | D    |                    |                 |                   |                  |                   |                  | 14 |
| 2  | 187.071333  | 94.039304       |                |                  | 169.060768        | 85.034022        | A    | 1344.650232        | 672.828754      | 1327.623683       | 664.315479       | 1326.639667       | 663.823471       | 13 |
| 3  | 315.129911  | 158.068593      | 298.103362     | 149.555319       | 297.119346        | 149.063311       | Q    | 1273.613118        | 637.310197      | 1256.586569       | 628.796922       | 1255.602553       | 628.304914       | 12 |
| 4  | 443.188489  | 222.097883      | 426.161940     | 213.584608       | 425.177924        | 213.092600       | Q    | <b>1145.554540</b> | 573.280908      | 1128.527991       | 564.767633       | 1127.543975       | 564.275625       | 11 |
| 5  | 530.220517  | 265.613897      | 513.193968     | 257.100622       | 512.209952        | 256.608614       | S    | <b>1017.495962</b> | 509.251619      | 1000.469413       | 500.738344       | 999.485397        | 500.246336       | 10 |
| 6  | 617.252545  | 309.129911      | 600.225996     | 300.616636       | 599.241980        | 300.124628       | S    | <b>930.463934</b>  | 465.735605      | 913.437385        | 457.222330       | 912.453369        | 456.730322       | 9  |
| 7  | 704.284573  | 352.645925      | 687.258024     | 344.132650       | <b>686.274008</b> | 343.640642       | S    | <b>843.431906</b>  | 422.219591      | 826.405357        | 413.706316       | 825.421341        | 413.214308       | 8  |
| 8  | 801.337337  | 401.172307      | 784.310788     | 392.659032       | 783.326772        | 392.167024       | P    | <b>756.399878</b>  | 378.703577      | <b>739.373329</b> | 370.190302       | 738.389313        | 369.698294       | 7  |
| 9  | 872.374451  | 436.690864      | 855.347902     | 428.177589       | 854.363886        | 427.685581       | A    | 659.347114         | 330.177195      | 642.320565        | 321.663920       | 641.336549        | 321.171912       | 6  |
| 10 | 943.411565  | 472.209421      | 926.385016     | 463.696146       | 925.401000        | 463.204138       | A    | 588.310000         | 294.658638      | 571.283451        | 286.145363       | 570.299435        | 285.653355       | 5  |
| 11 | 1058.438508 | 529.722892      | 1041.411959    | 521.209618       | 1040.427943       | 520.717609       | D    | <b>517.272886</b>  | 259.140081      | 500.246337        | 250.626806       | <b>499.262321</b> | 250.134798       | 4  |
| 12 | 1172.481435 | 586.744355      | 1155.454886    | 578.231081       | 1154.470870       | 577.739073       | N    | <b>402.245943</b>  | 201.626609      | 385.219394        | 193.113335       |                   |                  | 3  |
| 13 | 1285.565499 | 643.286387      | 1268.538950    | 634.773113       | 1267.554934       | 634.281105       | L    | 288.203016         | 144.605146      | 271.176467        | 136.091871       |                   |                  | 2  |
| 14 |             |                 |                |                  |                   |                  | R    | 175.118952         | 88.063114       | 158.092403        | 79.549839        |                   |                  | 1  |

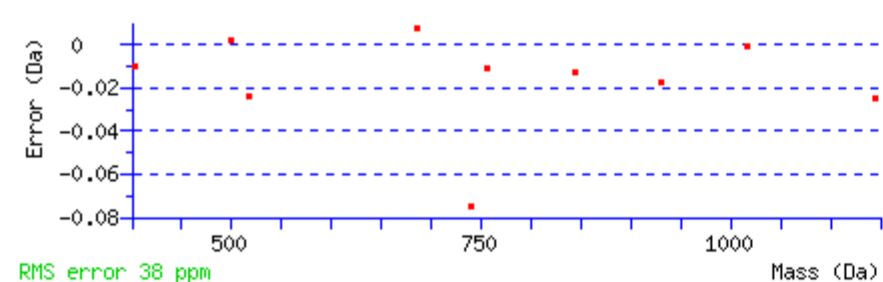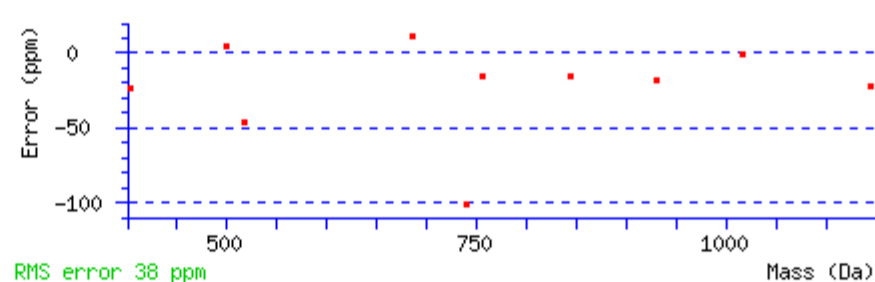

NCBI BLAST search of **DAQSSSPAADNLR**

(Parameters: blastp, nr protein database, expect=20000, no filter, PAM30)

Other BLAST [web gateways](#)

All matches to this query

| Score | Mr(calc):   | Delta    | Sequence                      |
|-------|-------------|----------|-------------------------------|
| 35.8  | 1458.669876 | 0.002052 | <a href="#">DAQSSSPAADNLR</a> |
| 1.0   | 1458.659531 | 0.012397 | <a href="#">QVDGEPCLAPAM</a>  |

Mascot: <http://www.matrixscience.com/>

# **MASCOT** Mascot Search Results

## Peptide View

MS/MS Fragmentation of **AVLENALR**

Found in **UFD1\_HUMAN**, Ubiquitin fusion degradation protein 1 homolog OS=Homo sapiens GN=UFD1L PE=1 SV=3

Match to Query 6920: 884.509868 from(443.262210,2+) rtinseconds(1755) index(17928)

Title: Locus:1.1.1.2012.9

Data file 2011-11-10 - TFD - EP 3-4.mgf

Click mouse within plot area to zoom in by factor of two about that point

Or, Plot from  to  Da

Label all possible matches  Label matches used for scoring

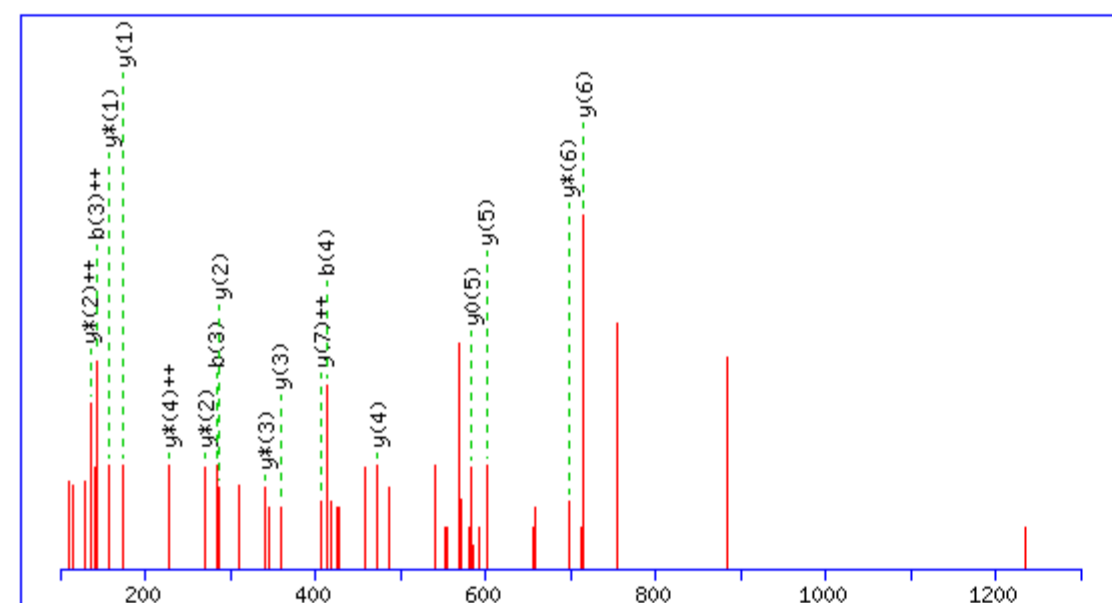

Monoisotopic mass of neutral peptide Mr(calc): 884.507935

Fixed modifications: Propionamide (C) (apply to specified residues or termini only)

Ions Score: 35 Expect: 0.0024

Matches : 17/62 fragment ions using 32 most intense peaks ([help](#))

| # | b          | b <sup>++</sup> | b <sup>*</sup> | b <sup>*++</sup> | b <sup>0</sup> | b <sup>0++</sup> | Seq. | y          | y <sup>++</sup> | y <sup>*</sup> | y <sup>*++</sup> | y <sup>0</sup> | y <sup>0++</sup> | # |
|---|------------|-----------------|----------------|------------------|----------------|------------------|------|------------|-----------------|----------------|------------------|----------------|------------------|---|
| 1 | 72.044390  | 36.525833       |                |                  |                |                  | A    |            |                 |                |                  |                |                  | 8 |
| 2 | 171.112804 | 86.060040       |                |                  |                |                  | V    | 814.478128 | 407.742702      | 797.451579     | 399.229428       | 796.467563     | 398.737420       | 7 |
| 3 | 284.196868 | 142.602072      |                |                  |                |                  | L    | 715.409714 | 358.208495      | 698.383165     | 349.695221       | 697.399149     | 349.203213       | 6 |
| 4 | 413.239461 | 207.123369      |                |                  | 395.228896     | 198.118086       | E    | 602.325650 | 301.666463      | 585.299101     | 293.153189       | 584.315085     | 292.661181       | 5 |
| 5 | 527.282388 | 264.144832      | 510.255839     | 255.631558       | 509.271823     | 255.139550       | N    | 473.283057 | 237.145167      | 456.256508     | 228.631892       |                |                  | 4 |
| 6 | 598.319502 | 299.663389      | 581.292953     | 291.150115       | 580.308937     | 290.658107       | A    | 359.240130 | 180.123703      | 342.213581     | 171.610429       |                |                  | 3 |
| 7 | 711.403566 | 356.205421      | 694.377017     | 347.692147       | 693.393001     | 347.200139       | L    | 288.203016 | 144.605146      | 271.176467     | 136.091872       |                |                  | 2 |
| 8 |            |                 |                |                  |                |                  | R    | 175.118952 | 88.063114       | 158.092403     | 79.549840        |                |                  | 1 |

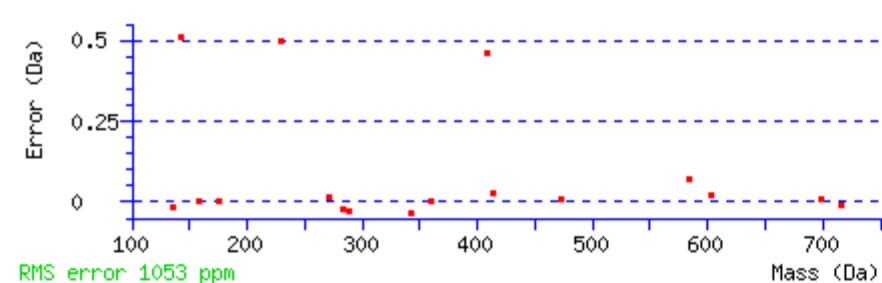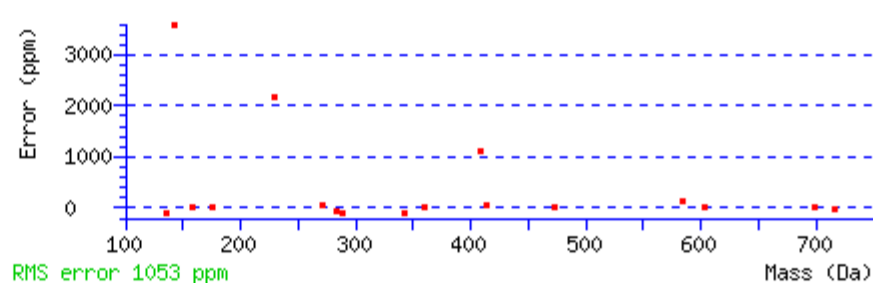

NCBI BLAST search of [AVLENALR](#)

(Parameters: blastp, nr protein database, expect=20000, no filter, PAM30)

Other BLAST [web gateways](#)

All matches to this query

| Score | Mr(calc):  | Delta    | Sequence                   |
|-------|------------|----------|----------------------------|
| 34.7  | 884.507935 | 0.001933 | <a href="#">AVLENALR</a>   |
| 19.7  | 884.507950 | 0.001918 | <a href="#">LPGEKLGR</a>   |
| 8.0   | 884.507950 | 0.001918 | <a href="#">AVVEKPAR</a>   |
| 6.2   | 884.507950 | 0.001918 | <a href="#">LTPAQALR</a>   |
| 3.4   | 884.507935 | 0.001933 | <a href="#">NLALEGLR</a>   |
| 2.6   | 884.507950 | 0.001918 | <a href="#">AIDVKSPR</a>   |
| 2.6   | 884.507950 | 0.001918 | <a href="#">ALQDLGLR</a>   |
| 0.8   | 884.507980 | 0.001888 | <a href="#">IGGGGVQLGK</a> |
| 0.4   | 884.507950 | 0.001918 | <a href="#">KSPLTAPR</a>   |



# MASCOT Search Results

## Peptide View

MS/MS Fragmentation of **SPGSSDNQSSSPQPAQQK**

Found in **UBP2L\_HUMAN**, Ubiquitin-associated protein 2-like OS=Homo sapiens GN=UBAP2L PE=1 SV=2

Match to Query 994255: 1828.818312 from(610.613380,3+) rtinseconds(753) index(157360)

Title: Locus:1.1.1.972.2

Data file C:\Program Files (x86)\Matrix Science\Mascot Daemon\mgf3 TFD - Epitel - R2\mascot\_daemon\_merge.mgf

Click mouse within plot area to zoom in by factor of two about that point

Or, Plot from  to  Da

Label all possible matches  Label matches used for scoring

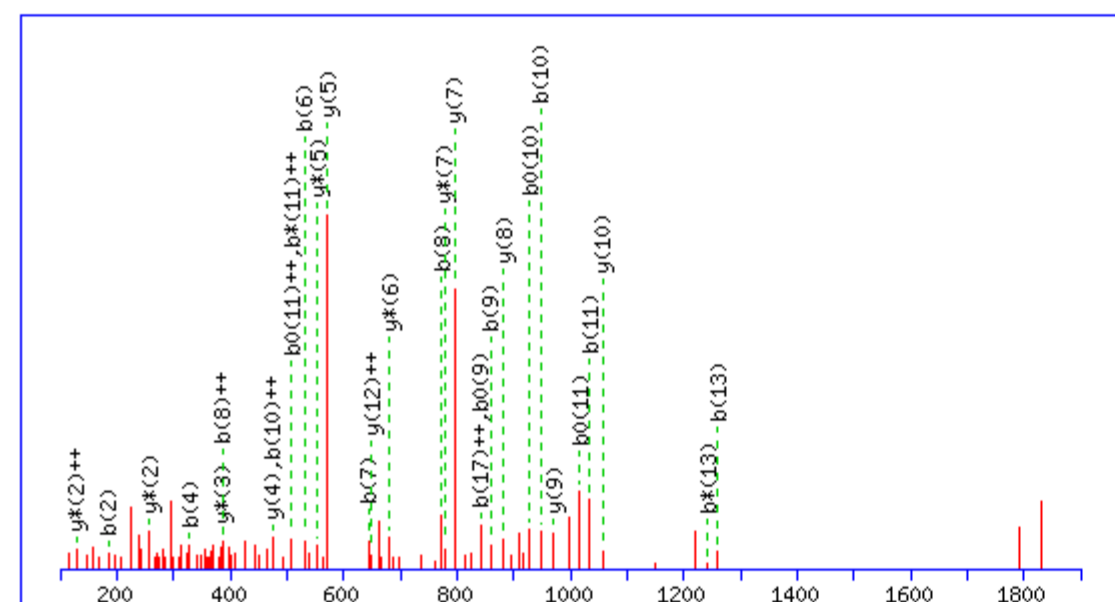

Monoisotopic mass of neutral peptide Mr(calc): 1828.818741

Fixed modifications: Carbamidomethyl (C) (apply to specified residues or termini only)

Ions Score: 54 Expect: 2.7e-005

Matches : 31/178 fragment ions using 44 most intense peaks [\(help\)](#)

| #  | b                  | b <sup>++</sup>   | b <sup>+</sup>     | b <sup>+++</sup>  | b <sup>0</sup>     | b <sup>0++</sup>  | Seq. | y                  | y <sup>++</sup>   | y <sup>+</sup>    | y <sup>+++</sup>  | y <sup>0</sup> | y <sup>0++</sup> | #  |
|----|--------------------|-------------------|--------------------|-------------------|--------------------|-------------------|------|--------------------|-------------------|-------------------|-------------------|----------------|------------------|----|
| 1  | 88.039304          | 44.523290         |                    |                   | 70.028739          | 35.518008         | S    |                    |                   |                   |                   |                |                  | 18 |
| 2  | <b>185.092068</b>  | 93.049672         |                    |                   | 167.081503         | 84.044389         | P    | 1742.793996        | 871.900636        | 1725.767447       | 863.387362        | 1724.783431    | 862.895354       | 17 |
| 3  | 242.113532         | 121.560404        |                    |                   | 224.102967         | 112.555121        | G    | 1645.741232        | 823.374254        | 1628.714683       | 814.860980        | 1627.730667    | 814.368972       | 16 |
| 4  | <b>329.145560</b>  | 165.076418        |                    |                   | 311.134995         | 156.071136        | S    | 1588.719768        | 794.863522        | 1571.693219       | 786.350248        | 1570.709203    | 785.858240       | 15 |
| 5  | 416.177588         | 208.592432        |                    |                   | 398.167023         | 199.587149        | S    | 1501.687740        | 751.347508        | 1484.661191       | 742.834234        | 1483.677175    | 742.342226       | 14 |
| 6  | <b>531.204531</b>  | 266.105904        |                    |                   | 513.193966         | 257.100621        | D    | 1414.655712        | 707.831494        | 1397.629163       | 699.318220        | 1396.645147    | 698.826212       | 13 |
| 7  | <b>645.247458</b>  | 323.127367        | 628.220909         | 314.614092        | 627.236893         | 314.122084        | N    | 1299.628769        | <b>650.318023</b> | 1282.602220       | 641.804748        | 1281.618204    | 641.312740       | 12 |
| 8  | <b>773.306036</b>  | <b>387.156656</b> | 756.279487         | 378.643381        | 755.295471         | 378.151373        | Q    | 1185.585842        | 593.296559        | 1168.559293       | 584.783285        | 1167.575277    | 584.291277       | 11 |
| 9  | <b>860.338064</b>  | 430.672670        | 843.311515         | 422.159395        | <b>842.327499</b>  | 421.667387        | S    | <b>1057.527264</b> | 529.267270        | 1040.500715       | 520.753996        | 1039.516699    | 520.261988       | 10 |
| 10 | <b>947.370092</b>  | <b>474.188684</b> | 930.343543         | 465.675409        | <b>929.359527</b>  | 465.183401        | S    | <b>970.495236</b>  | 485.751256        | 953.468687        | 477.237982        | 952.484671     | 476.745974       | 9  |
| 11 | <b>1034.402120</b> | 517.704698        | 1017.375571        | <b>509.191423</b> | <b>1016.391555</b> | <b>508.699415</b> | S    | <b>883.463208</b>  | 442.235242        | 866.436659        | 433.721968        | 865.452643     | 433.229960       | 8  |
| 12 | 1131.454884        | 566.231080        | 1114.428335        | 557.717806        | 1113.444319        | 557.225798        | P    | <b>796.431180</b>  | 398.719228        | <b>779.404631</b> | 390.205954        |                |                  | 7  |
| 13 | <b>1259.513462</b> | 630.260369        | <b>1242.486913</b> | 621.747095        | 1241.502897        | 621.255087        | Q    | 699.378416         | 350.192846        | <b>682.351867</b> | 341.679572        |                |                  | 6  |
| 14 | 1356.566226        | 678.786751        | 1339.539677        | 670.273477        | 1338.555661        | 669.781469        | P    | <b>571.319838</b>  | 286.163557        | <b>554.293289</b> | 277.650283        |                |                  | 5  |
| 15 | 1427.603340        | 714.305308        | 1410.576791        | 705.792034        | 1409.592775        | 705.300026        | A    | <b>474.267074</b>  | 237.637175        | 457.240525        | 229.123900        |                |                  | 4  |
| 16 | 1555.661918        | 778.334597        | 1538.635369        | 769.821323        | 1537.651353        | 769.329315        | Q    | 403.229960         | 202.118618        | <b>386.203411</b> | 193.605344        |                |                  | 3  |
| 17 | 1683.720496        | <b>842.363886</b> | 1666.693947        | 833.850612        | 1665.709931        | 833.358604        | Q    | 275.171382         | 138.089329        | <b>258.144833</b> | <b>129.576055</b> |                |                  | 2  |
| 18 |                    |                   |                    |                   |                    |                   | K    | 147.112804         | 74.060040         | 130.086255        | 65.546765         |                |                  | 1  |

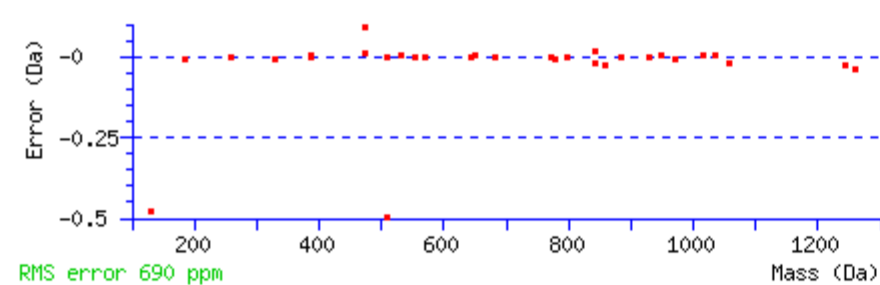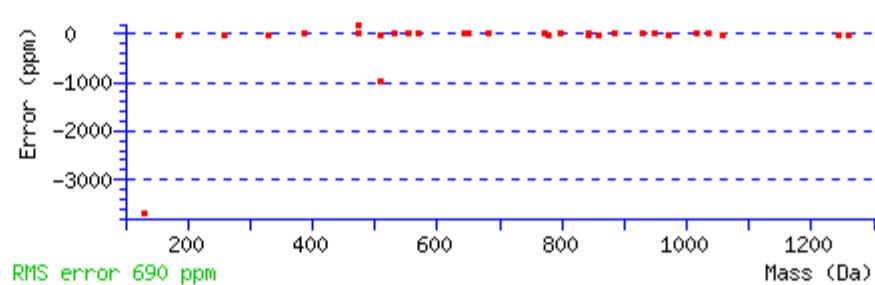

NCBI BLAST search of **SPGSSDNQSSSPQPAQQK**

(Parameters: blastp, nr protein database, expect=20000, no filter, PAM30)

Other BLAST [web gateways](#)

## All matches to this query

| Score | Mr(calc):   | Delta     | Sequence                           |
|-------|-------------|-----------|------------------------------------|
| 53.6  | 1828.818741 | -0.000429 | <a href="#">SPGSSDNQSSSPQPAQQK</a> |
| 5.0   | 1828.827667 | -0.009355 | <a href="#">MAAAPPSYCFVAFPPR</a>   |
| 0.8   | 1828.827667 | -0.009355 | <a href="#">MAAAPPSYCFVAFPPR</a>   |
| 0.8   | 1828.827667 | -0.009355 | <a href="#">MAAAPPSYCFVAFPPR</a>   |

# MASCOT Search Results

## Peptide View

MS/MS Fragmentation of **LMTTGNNTVR**

Found in **UBE2Z\_HUMAN**, Ubiquitin-conjugating enzyme E2 Z OS=Homo sapiens GN=UBE2Z PE=1 SV=2

Match to Query 23853: 1121.548828 from(561.781690,2+) rtinseconds(870) index(1703)

Title: Locus:1.1.1.1659.31

Data file 2011-11-10 - TFD - EP 4-4.mgf

Click mouse within plot area to zoom in by factor of two about that point

Or, Plot from  to  Da

Label all possible matches  Label matches used for scoring

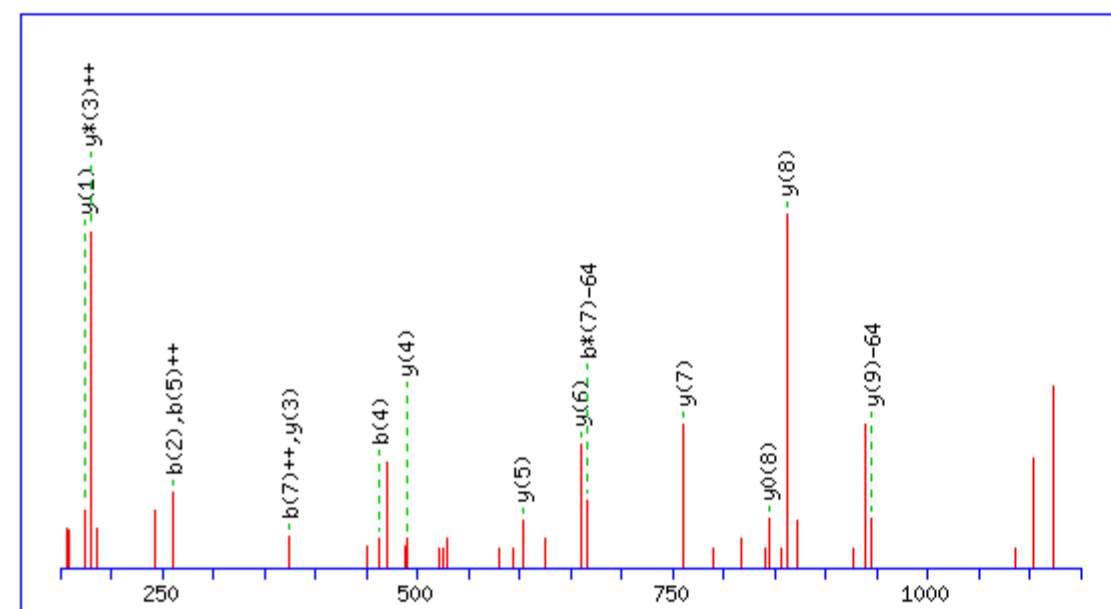

Monoisotopic mass of neutral peptide Mr(calc): 1121.549911

Fixed modifications: Propionamide (C) (apply to specified residues or termini only)

Variable modifications:

M2 : Oxidation (M), with neutral losses 63.998285 (shown in table), 0.000000

Ions Score: 52 Expect: 4.6e-005

Matches : 15/134 fragment ions using 22 most intense peaks [\(help\)](#)

| #  | b          | b <sup>++</sup> | b <sup>*</sup> | b <sup>*++</sup> | b <sup>0</sup> | b <sup>0++</sup> | Seq. | y          | y <sup>++</sup> | y <sup>*</sup> | y <sup>*++</sup> | y <sup>0</sup> | y <sup>0++</sup> | #  |
|----|------------|-----------------|----------------|------------------|----------------|------------------|------|------------|-----------------|----------------|------------------|----------------|------------------|----|
| 1  | 114.091340 | 57.549308       |                |                  |                |                  | L    |            |                 |                |                  |                |                  | 10 |
| 2  | 197.128455 | 99.067865       |                |                  |                |                  | M    | 945.474836 | 473.241056      | 928.448287     | 464.727782       | 927.464271     | 464.235774       | 9  |
| 3  | 298.176134 | 149.591705      |                |                  | 280.165569     | 140.586423       | T    | 862.437721 | 431.722499      | 845.411172     | 423.209224       | 844.427156     | 422.717216       | 8  |
| 4  | 399.223813 | 200.115545      |                |                  | 381.213248     | 191.110262       | T    | 761.390042 | 381.198659      | 744.363493     | 372.685385       | 743.379477     | 372.193377       | 7  |
| 5  | 456.245277 | 228.626277      |                |                  | 438.234712     | 219.620994       | G    | 660.342363 | 330.674820      | 643.315814     | 322.161545       | 642.331798     | 321.669537       | 6  |
| 6  | 570.288204 | 285.647740      | 553.261655     | 277.134466       | 552.277639     | 276.642458       | N    | 603.320899 | 302.164088      | 586.294350     | 293.650813       | 585.310334     | 293.158805       | 5  |
| 7  | 684.331131 | 342.669204      | 667.304582     | 334.155929       | 666.320566     | 333.663921       | N    | 489.277972 | 245.142624      | 472.251423     | 236.629349       | 471.267407     | 236.137341       | 4  |
| 8  | 785.378810 | 393.193043      | 768.352261     | 384.679769       | 767.368245     | 384.187761       | T    | 375.235045 | 188.121161      | 358.208496     | 179.607886       | 357.224480     | 179.115878       | 3  |
| 9  | 884.447224 | 442.727250      | 867.420675     | 434.213976       | 866.436659     | 433.721968       | V    | 274.187366 | 137.597321      | 257.160817     | 129.084047       |                |                  | 2  |
| 10 |            |                 |                |                  |                |                  | R    | 175.118952 | 88.063114       | 158.092403     | 79.549840        |                |                  | 1  |

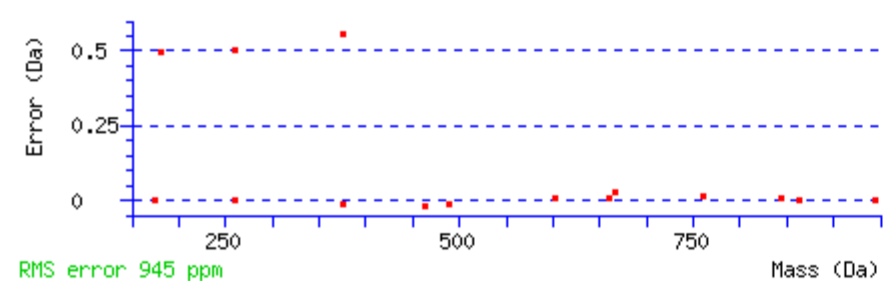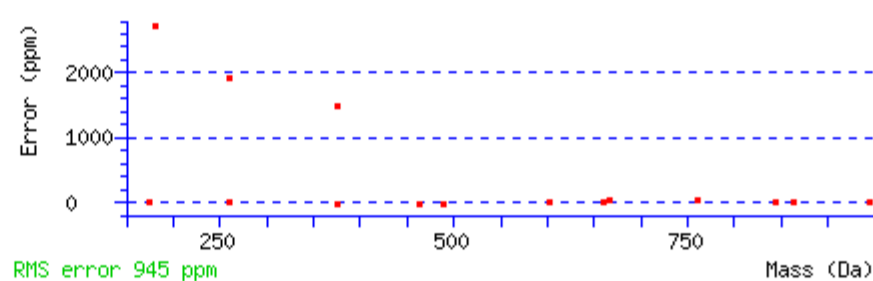

NCBI BLAST search of [LMTTGNNTVR](#)

(Parameters: blastp, nr protein database, expect=20000, no filter, PAM30)

Other BLAST [web gateways](#)

## All matches to this query

| Score | Mr(calc):   | Delta     | Sequence                     |
|-------|-------------|-----------|------------------------------|
| 52.5  | 1121.549911 | -0.001083 | <a href="#">LMTTGNNTVR</a>   |
| 5.9   | 1121.546555 | 0.002273  | <a href="#">VGPGYLGSGGSR</a> |
| 5.4   | 1121.538651 | 0.010177  | <a href="#">SREDMIDIK</a>    |
| 5.3   | 1121.553925 | -0.005097 | <a href="#">MLIPFSNPR</a>    |
| 4.7   | 1121.556412 | -0.007584 | <a href="#">ALSLASSGSDK</a>  |
| 4.5   | 1121.553925 | -0.005097 | <a href="#">QGFMEKTGPK</a>   |
| 1.0   | 1121.553925 | -0.005097 | <a href="#">LFPMSALDGR</a>   |
| 0.4   | 1121.546539 | 0.002289  | <a href="#">FSGTSGPNLR</a>   |
| 0.3   | 1121.546036 | 0.002792  | <a href="#">MELLECVSK</a>    |

# MASCOT SCIENCE Mascot Search Results

## Peptide View

MS/MS Fragmentation of **ITLTSDPR**

Found in **UFMI\_HUMAN**, Ubiquitin-fold modifier 1 OS=Homo sapiens GN=UFM1 PE=1 SV=1

Match to Query 6174: 901.486348 from(451.750450,2+) rtinseconds(1522) index(4262)

Title: Locus:1.1.1.2215.6

Data file 2011-11-12 - TFD - EP 5-8.mgf

Click mouse within plot area to zoom in by factor of two about that point

Or, Plot from  to  Da

Label all possible matches  Label matches used for scoring

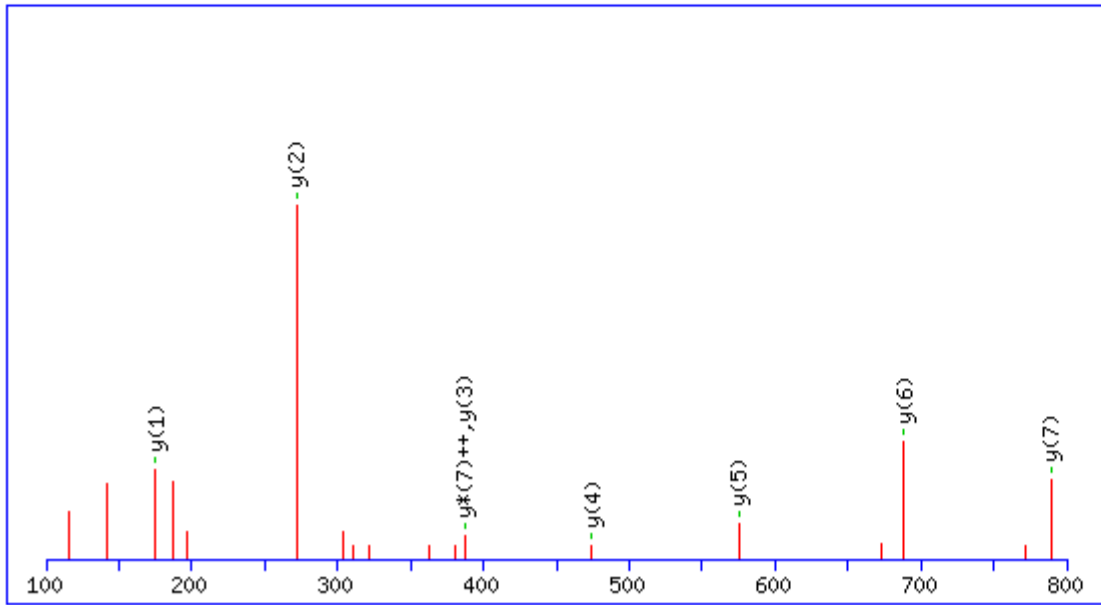

Monoisotopic mass of neutral peptide  $M_r(\text{calc})$ : 901.486893

Fixed modifications: Propionamide (C) (apply to specified residues or termini only)

Ions Score: 81 Expect: 1.2e-007

Matches : 8/64 fragment ions using 7 most intense peaks [\(help\)](#)

| # | b          | b <sup>++</sup> | b <sup>0</sup> | b <sup>0++</sup> | Seq. | y                 | y <sup>++</sup> | y <sup>*</sup> | y <sup>*++</sup>  | y <sup>0</sup> | y <sup>0++</sup> | # |
|---|------------|-----------------|----------------|------------------|------|-------------------|-----------------|----------------|-------------------|----------------|------------------|---|
| 1 | 114.091340 | 57.549308       |                |                  | I    |                   |                 |                |                   |                |                  | 8 |
| 2 | 215.139019 | 108.073147      | 197.128454     | 99.067865        | T    | <b>789.410109</b> | 395.208693      | 772.383560     | <b>386.695418</b> | 771.399544     | 386.203410       | 7 |
| 3 | 328.223083 | 164.615179      | 310.212518     | 155.609897       | L    | <b>688.362430</b> | 344.684853      | 671.335881     | 336.171579        | 670.351865     | 335.679571       | 6 |
| 4 | 429.270762 | 215.139019      | 411.260197     | 206.133737       | T    | <b>575.278366</b> | 288.142821      | 558.251817     | 279.629547        | 557.267801     | 279.137539       | 5 |
| 5 | 516.302790 | 258.655033      | 498.292225     | 249.649751       | S    | <b>474.230687</b> | 237.618981      | 457.204138     | 229.105707        | 456.220122     | 228.613699       | 4 |
| 6 | 631.329733 | 316.168505      | 613.319168     | 307.163222       | D    | <b>387.198659</b> | 194.102967      | 370.172110     | 185.589693        | 369.188094     | 185.097685       | 3 |
| 7 | 728.382497 | 364.694887      | 710.371932     | 355.689604       | P    | <b>272.171716</b> | 136.589496      | 255.145167     | 128.076221        |                |                  | 2 |
| 8 |            |                 |                |                  | R    | <b>175.118952</b> | 88.063114       | 158.092403     | 79.549839         |                |                  | 1 |

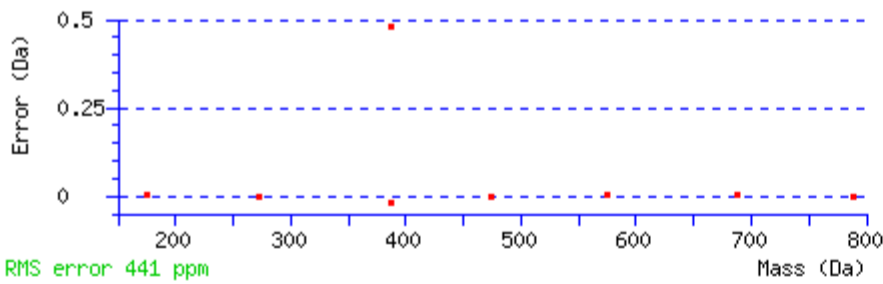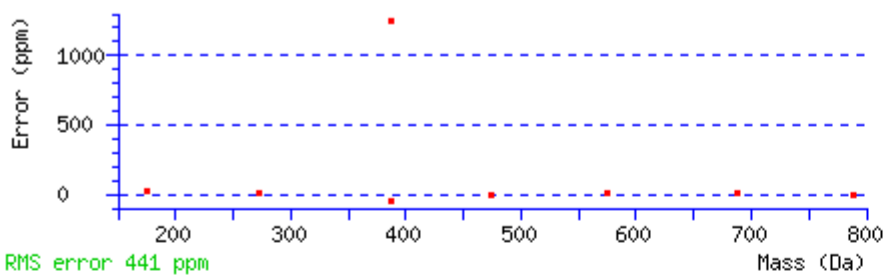

NCBI **BLAST** search of [ITLTSDPR](#)

(Parameters: blastp, nr protein database, expect=20000, no filter, PAM30)

Other BLAST [web gateways](#)

## All matches to this query

| Score | $M_r(\text{calc})$ : | Delta     | Sequence                 |
|-------|----------------------|-----------|--------------------------|
| 81.1  | 901.486893           | -0.000545 | <a href="#">ITLTSDPR</a> |
| 28.2  | 901.486893           | -0.000545 | <a href="#">LTVDEAVR</a> |
| 15.5  | 901.486893           | -0.000545 | <a href="#">TLIVDGER</a> |
| 13.4  | 901.486877           | -0.000529 | <a href="#">LGEEVSLR</a> |
| 13.4  | 901.480347           | 0.006001  | <a href="#">LMAIQNGR</a> |
| 13.4  | 901.486877           | -0.000529 | <a href="#">LSLDELGR</a> |
| 11.9  | 901.486862           | -0.000514 | <a href="#">LEEEVKR</a>  |
| 11.6  | 901.486893           | -0.000545 | <a href="#">TPPLSSLR</a> |
| 11.2  | 901.480347           | 0.006001  | <a href="#">KLCNTPR</a>  |
| 10.8  | 901.486862           | -0.000514 | <a href="#">LELDEKR</a>  |

# **MASCOT** Mascot Search Results

## Peptide View

### MS/MS Fragmentation of **TLTGVLPER**

Found in **UBCP1\_HUMAN**, Ubiquitin-like domain-containing CTD phosphatase 1 OS=Homo sapiens GN=UBLCP1 PE=1 SV=2

Match to Query 14817: 984.554428 from(493.284490,2+) rtinseconds(1991) index(21904)

Title: Locus:1.1.1.2176.18

Data file 2011-11-12 - TFD - EP 5-4.mgf

Click mouse within plot area to zoom in by factor of two about that point

Or, Plot from  to  Da

Label all possible matches  Label matches used for scoring

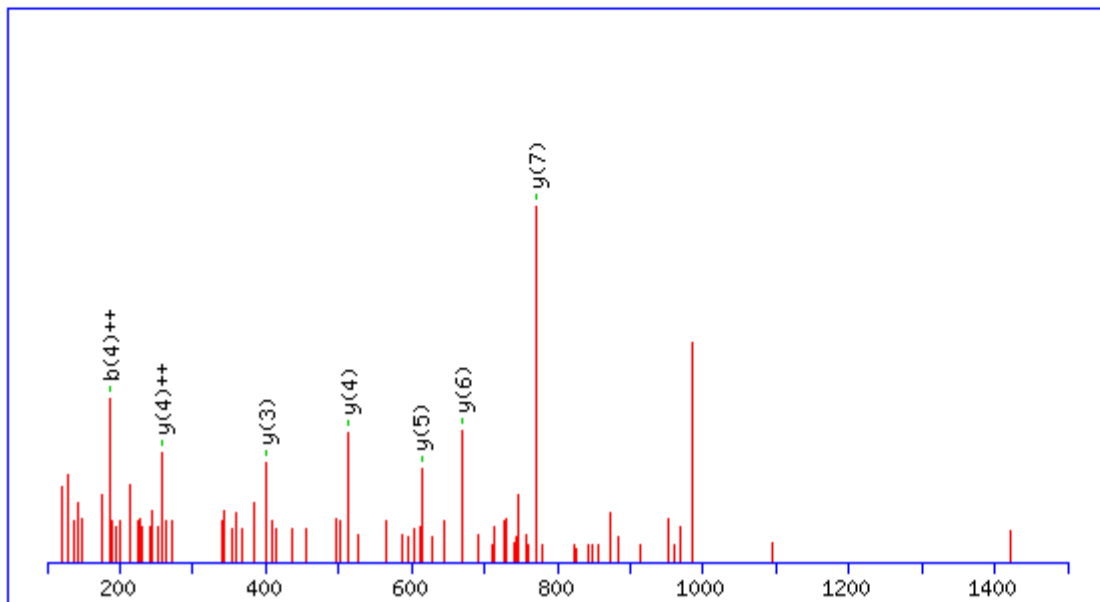

Monoisotopic mass of neutral peptide Mr(calc): 984.560394

Fixed modifications: Propionamide (C) (apply to specified residues or termini only)

Ions Score: 34 Expect: 0.0025

Matches : 7/78 fragment ions using 9 most intense peaks ([help](#))

| # | b          | b <sup>++</sup>   | b <sup>0</sup> | b <sup>0++</sup> | Seq. | y                 | y <sup>++</sup>   | y <sup>*</sup> | y <sup>*++</sup> | y <sup>0</sup> | y <sup>0++</sup> | # |
|---|------------|-------------------|----------------|------------------|------|-------------------|-------------------|----------------|------------------|----------------|------------------|---|
| 1 | 102.054955 | 51.531116         | 84.044390      | 42.525833        | T    |                   |                   |                |                  |                |                  | 9 |
| 2 | 215.139019 | 108.073147        | 197.128454     | 99.067865        | L    | 884.519994        | 442.763635        | 867.493445     | 434.250361       | 866.509429     | 433.758353       | 8 |
| 3 | 316.186698 | 158.596987        | 298.176133     | 149.591704       | T    | <b>771.435930</b> | 386.221603        | 754.409381     | 377.708328       | 753.425365     | 377.216320       | 7 |
| 4 | 373.208162 | <b>187.107719</b> | 355.197597     | 178.102436       | G    | <b>670.388251</b> | 335.697764        | 653.361702     | 327.184489       | 652.377686     | 326.692481       | 6 |
| 5 | 472.276576 | 236.641926        | 454.266011     | 227.636643       | V    | <b>613.366787</b> | 307.187032        | 596.340238     | 298.673757       | 595.356222     | 298.181749       | 5 |
| 6 | 585.360640 | 293.183958        | 567.350075     | 284.178676       | L    | <b>514.298373</b> | <b>257.652825</b> | 497.271824     | 249.139550       | 496.287808     | 248.647542       | 4 |
| 7 | 682.413404 | 341.710340        | 664.402839     | 332.705058       | P    | <b>401.214309</b> | 201.110792        | 384.187760     | 192.597518       | 383.203744     | 192.105510       | 3 |
| 8 | 811.455997 | 406.231637        | 793.445432     | 397.226354       | E    | 304.161545        | 152.584410        | 287.134996     | 144.071136       | 286.150980     | 143.579128       | 2 |
| 9 |            |                   |                |                  | R    | 175.118952        | 88.063114         | 158.092403     | 79.549839        |                |                  | 1 |

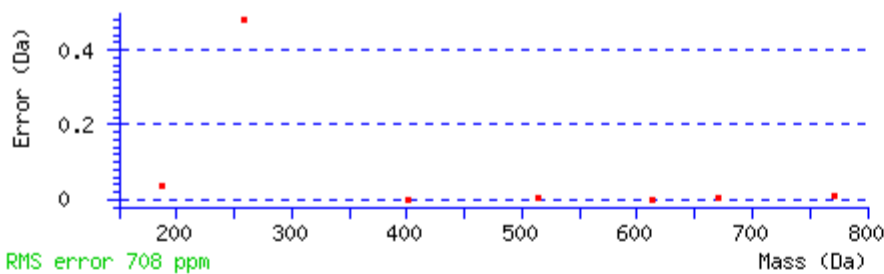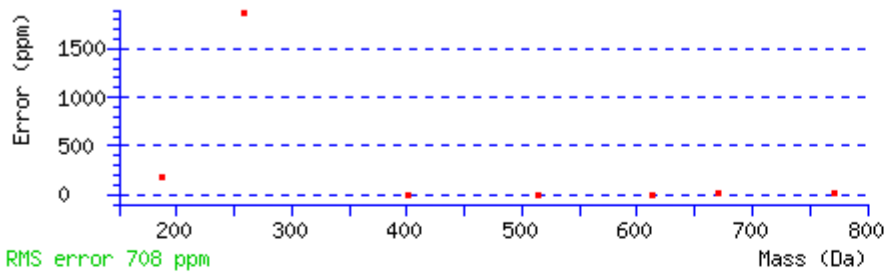

### NCBI BLAST search of **TLTGVLPER**

(Parameters: blastp, nr protein database, expect=20000, no filter, PAM30)

Other BLAST [web gateways](#)

### All matches to this query

| Score | Mr(calc):  | Delta     | Sequence                   |
|-------|------------|-----------|----------------------------|
| 33.5  | 984.560394 | -0.005966 | <a href="#">TLTGVLPER</a>  |
| 5.5   | 984.546463 | 0.007965  | <a href="#">VSAQRATPR</a>  |
| 3.4   | 984.549149 | 0.005279  | <a href="#">IPPADSLLK</a>  |
| 3.3   | 984.546448 | 0.007980  | <a href="#">IPNLSRNR</a>   |
| 2.6   | 984.560364 | -0.005936 | <a href="#">ILDAAGANLK</a> |
| 1.8   | 984.546432 | 0.007996  | <a href="#">LNINARER</a>   |

# **Mascot Search Results**

## Peptide View

MS/MS Fragmentation of **LSDYSIGPNSK**

Found in **UBL4A\_HUMAN**, Ubiquitin-like protein 4A OS=Homo sapiens GN=UBL4A PE=1 SV=1

Match to Query 29173: 1179.576308 from(590.795430,2+) rtinseconds(1705) index(15511)

Title: Locus:1.1.1.1800.44

Data file 2011-11-12 - TFD - EP 6-6.mgf

Click mouse within plot area to zoom in by factor of two about that point

Or, Plot from  to  Da

Label all possible matches  Label matches used for scoring

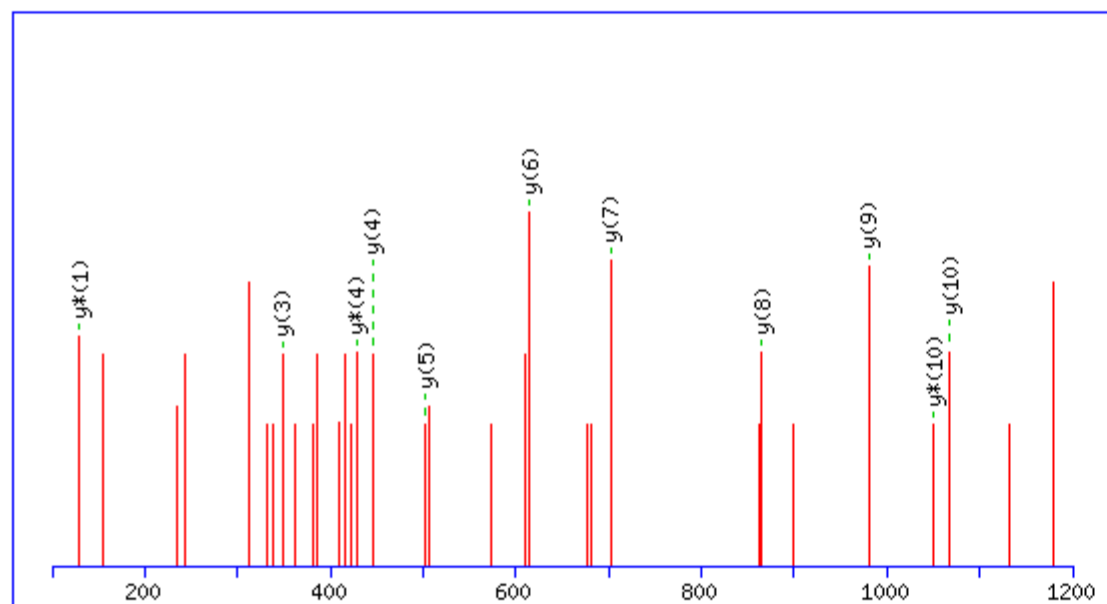

Monoisotopic mass of neutral peptide Mr(calc): 1179.577148

Fixed modifications: Propionamide (C) (apply to specified residues or termini only)

Ions Score: 51 Expect: 6.1e-005

Matches : 11/100 fragment ions using 24 most intense peaks [\(help\)](#)

| #  | b           | b <sup>++</sup> | b <sup>*</sup> | b <sup>+++</sup> | b <sup>0</sup> | b <sup>0++</sup> | Seq. | y           | y <sup>++</sup> | y <sup>*</sup> | y <sup>+++</sup> | y <sup>0</sup> | y <sup>0++</sup> | #  |
|----|-------------|-----------------|----------------|------------------|----------------|------------------|------|-------------|-----------------|----------------|------------------|----------------|------------------|----|
| 1  | 114.091340  | 57.549308       |                |                  |                |                  | L    |             |                 |                |                  |                |                  | 11 |
| 2  | 201.123368  | 101.065322      |                |                  | 183.112803     | 92.060039        | S    | 1067.500379 | 534.253828      | 1050.473830    | 525.740553       | 1049.489814    | 525.248545       | 10 |
| 3  | 316.150311  | 158.578793      |                |                  | 298.139746     | 149.573511       | D    | 980.468351  | 490.737814      | 963.441802     | 482.224539       | 962.457786     | 481.732531       | 9  |
| 4  | 479.213640  | 240.110458      |                |                  | 461.203075     | 231.105176       | Y    | 865.441408  | 433.224342      | 848.414859     | 424.711068       | 847.430843     | 424.219060       | 8  |
| 5  | 566.245668  | 283.626472      |                |                  | 548.235103     | 274.621190       | S    | 702.378079  | 351.692678      | 685.351530     | 343.179403       | 684.367514     | 342.687395       | 7  |
| 6  | 679.329732  | 340.168504      |                |                  | 661.319167     | 331.163222       | I    | 615.346051  | 308.176664      | 598.319502     | 299.663389       | 597.335486     | 299.171381       | 6  |
| 7  | 736.351196  | 368.679236      |                |                  | 718.340631     | 359.673954       | G    | 502.261987  | 251.634632      | 485.235438     | 243.121357       | 484.251422     | 242.629349       | 5  |
| 8  | 833.403960  | 417.205618      |                |                  | 815.393395     | 408.200336       | P    | 445.240523  | 223.123900      | 428.213974     | 214.610625       | 427.229958     | 214.118617       | 4  |
| 9  | 947.446887  | 474.227082      | 930.420338     | 465.713807       | 929.436322     | 465.221799       | N    | 348.187759  | 174.597518      | 331.161210     | 166.084243       | 330.177194     | 165.592235       | 3  |
| 10 | 1034.478915 | 517.743096      | 1017.452366    | 509.229821       | 1016.468350    | 508.737813       | S    | 234.144832  | 117.576054      | 217.118283     | 109.062780       | 216.134267     | 108.570772       | 2  |
| 11 |             |                 |                |                  |                |                  | K    | 147.112804  | 74.060040       | 130.086255     | 65.546765        |                |                  | 1  |

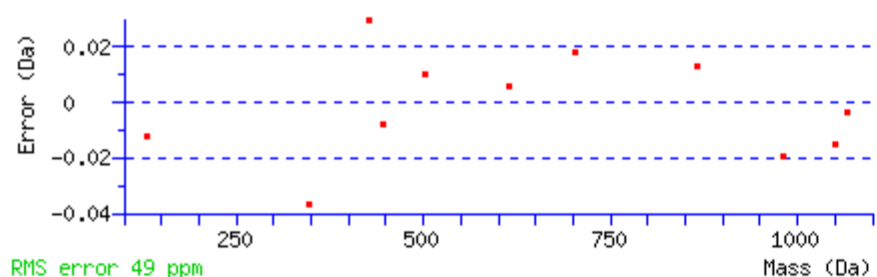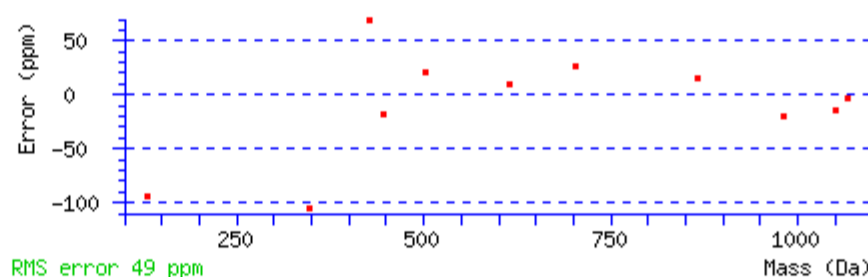

NCBI BLAST search of **LSDYSIGPNSK**

(Parameters: blastp, nr protein database, expect=20000, no filter, PAM30)

Other BLAST [web gateways](#)

All matches to this query

| Score | Mr(calc):   | Delta     | Sequence                    |
|-------|-------------|-----------|-----------------------------|
| 50.7  | 1179.577148 | -0.000840 | <a href="#">LSDYSIGPNSK</a> |
| 5.8   | 1179.573975 | 0.002333  | <a href="#">LAMTREMNSK</a>  |

Mascot: <http://www.matrixscience.com/>

# MASCOT SCIENCE Mascot Search Results

## Peptide View

MS/MS Fragmentation of **ALEVAEYLTPVLK**

Found in **ATG3\_HUMAN**, Ubiquitin-like-conjugating enzyme ATG3 OS=Homo sapiens GN=ATG3 PE=1 SV=1

Match to Query 43152: 1444.822148 from(723.418350,2+) rtinseconds(3582) index(52214)

Title: Locus:1.1.1.2789.24

Data file 2011-11-13 - TFD - EP 7-4.mgf

Click mouse within plot area to zoom in by factor of two about that point

Or, Plot from  to  Da

Label all possible matches  Label matches used for scoring

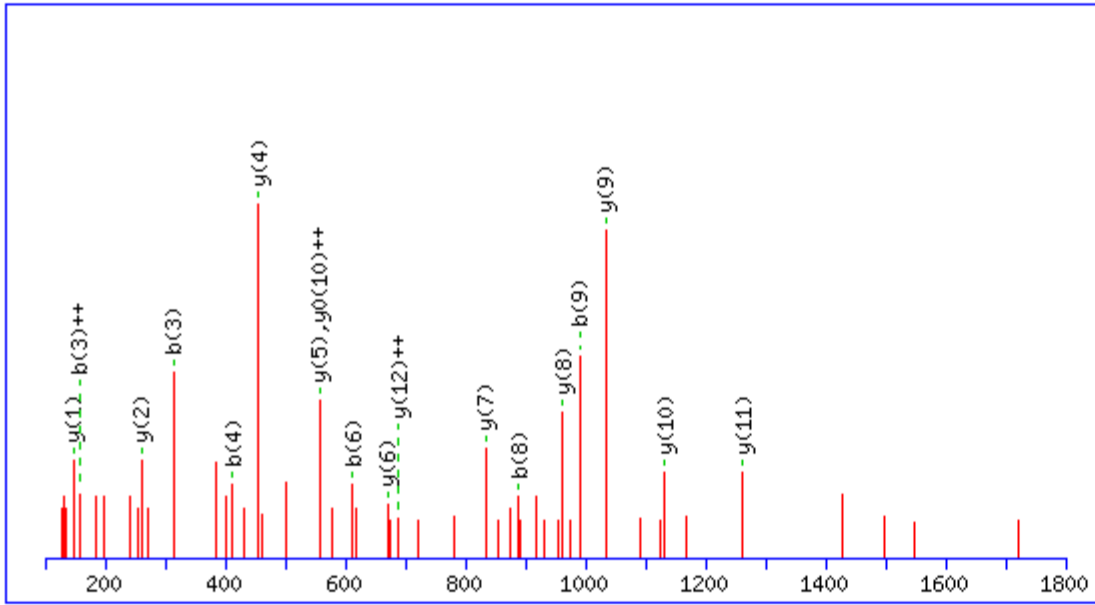

Monoisotopic mass of neutral peptide Mr(calc): 1444.817703

Fixed modifications: Propionamide (C) (apply to specified residues or termini only)

Ions Score: 81 Expect: 2.3e-008

Matches : 18/108 fragment ions using 24 most intense peaks [\(help\)](#)

| #  | b           | b <sup>++</sup> | b <sup>0</sup> | b <sup>0++</sup> | Seq. | y           | y <sup>++</sup> | y <sup>*</sup> | y <sup>***</sup> | y <sup>0</sup> | y <sup>0++</sup> | #  |
|----|-------------|-----------------|----------------|------------------|------|-------------|-----------------|----------------|------------------|----------------|------------------|----|
| 1  | 72.044390   | 36.525833       |                |                  | A    |             |                 |                |                  |                |                  | 13 |
| 2  | 185.128454  | 93.067865       |                |                  | L    | 1374.787896 | 687.897586      | 1357.761347    | 679.384312       | 1356.777331    | 678.892304       | 12 |
| 3  | 314.171047  | 157.589161      | 296.160482     | 148.583879       | E    | 1261.703832 | 631.355554      | 1244.677283    | 622.842280       | 1243.693267    | 622.350271       | 11 |
| 4  | 413.239461  | 207.123369      | 395.228896     | 198.118086       | V    | 1132.661239 | 566.834258      | 1115.634690    | 558.320983       | 1114.650674    | 557.828975       | 10 |
| 5  | 484.276575  | 242.641926      | 466.266010     | 233.636643       | A    | 1033.592825 | 517.300051      | 1016.566276    | 508.786776       | 1015.582260    | 508.294768       | 9  |
| 6  | 613.319168  | 307.163222      | 595.308603     | 298.157940       | E    | 962.555711  | 481.781494      | 945.529162     | 473.268219       | 944.545146     | 472.776211       | 8  |
| 7  | 776.382497  | 388.694887      | 758.371932     | 379.689604       | Y    | 833.513118  | 417.260197      | 816.486569     | 408.746922       | 815.502553     | 408.254914       | 7  |
| 8  | 889.466561  | 445.236919      | 871.455996     | 436.231636       | L    | 670.449789  | 335.728533      | 653.423240     | 327.215258       | 652.439224     | 326.723250       | 6  |
| 9  | 990.514240  | 495.760758      | 972.503675     | 486.755476       | T    | 557.365725  | 279.186501      | 540.339176     | 270.673226       | 539.355160     | 270.181218       | 5  |
| 10 | 1087.567004 | 544.287140      | 1069.556439    | 535.281858       | P    | 456.318046  | 228.662661      | 439.291497     | 220.149386       |                |                  | 4  |
| 11 | 1186.635418 | 593.821347      | 1168.624853    | 584.816065       | V    | 359.265282  | 180.136279      | 342.238733     | 171.623004       |                |                  | 3  |
| 12 | 1299.719482 | 650.363379      | 1281.708917    | 641.358096       | L    | 260.196868  | 130.602072      | 243.170319     | 122.088797       |                |                  | 2  |
| 13 |             |                 |                |                  | K    | 147.112804  | 74.060040       | 130.086255     | 65.546765        |                |                  | 1  |

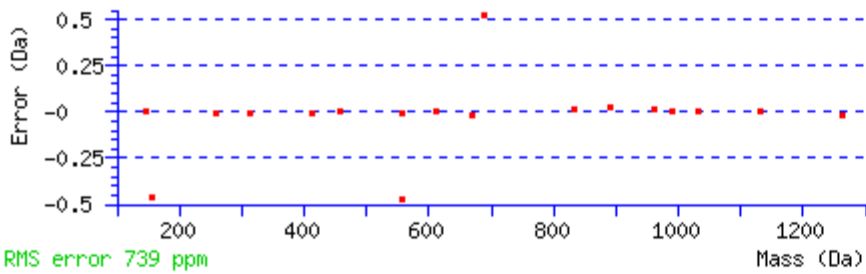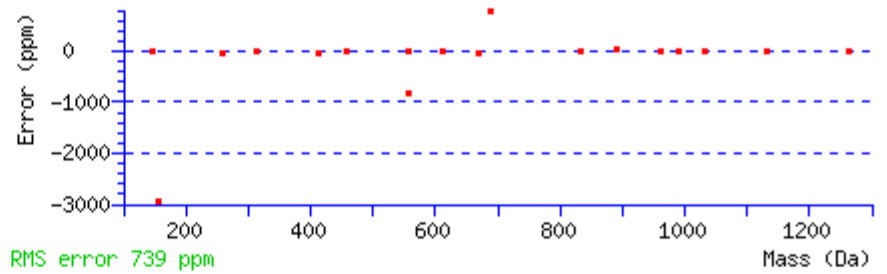

NCBI BLAST search of [ALEVAEYLTPVLK](#)

(Parameters: blastp, nr protein database, expect=20000, no filter, PAM30)

Other BLAST [web gateways](#)

## All matches to this query

| Score | Mr(calc):   | Delta    | Sequence                       |
|-------|-------------|----------|--------------------------------|
| 81.3  | 1444.817703 | 0.004445 | <a href="#">ALEVAEYLTPVLK</a>  |
| 2.1   | 1444.813675 | 0.008473 | <a href="#">KLLTASDLAASDLK</a> |
| 1.0   | 1444.811157 | 0.010991 | <a href="#">AHILYMSLEKLLK</a>  |

Mascot: <http://www.matrixscience.com/>

# MASCOT Search Results

## Peptide View

MS/MS Fragmentation of **VTSEPPNPASSSK**

Found in **UBXN4\_HUMAN**, UBX domain-containing protein 4 OS=Homo sapiens GN=UBXN4 PE=1 SV=2

Match to Query 733991: 1386.663688 from(694.339120,2+) rtinseconds(1065) index(159169)

Title: Locus:1.1.1.1090.24

Data file C:\Program Files (x86)\Matrix Science\Mascot Daemon\mgf3 TFD - Epitel - R2\mascot\_daemon\_merge.mgf

Click mouse within plot area to zoom in by factor of two about that point

Or, Plot from  to  Da

Label all possible matches  Label matches used for scoring

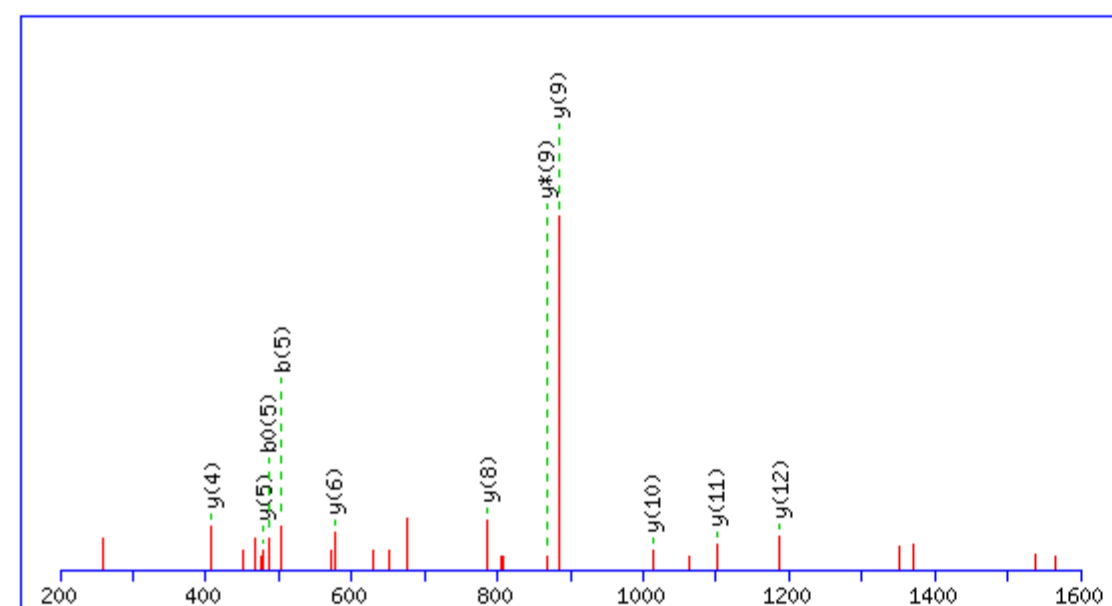

Monoisotopic mass of neutral peptide Mr(calc): 1386.662674

Fixed modifications: Carbamidomethyl (C) (apply to specified residues or termini only)

Ions Score: 43 Expect: 0.0006

Matches : 11/138 fragment ions using 25 most intense peaks [\(help\)](#)

| #  | b                 | b <sup>++</sup> | b <sup>*</sup> | b <sup>*++</sup> | b <sup>0</sup>    | b <sup>0++</sup> | Seq. | y                  | y <sup>++</sup> | y <sup>*</sup>    | y <sup>*++</sup> | y <sup>0</sup> | y <sup>0++</sup> | #  |
|----|-------------------|-----------------|----------------|------------------|-------------------|------------------|------|--------------------|-----------------|-------------------|------------------|----------------|------------------|----|
| 1  | 100.075690        | 50.541483       |                |                  |                   |                  | V    |                    |                 |                   |                  |                |                  | 14 |
| 2  | 201.123369        | 101.065322      |                |                  | 183.112804        | 92.060040        | T    | 1288.601549        | 644.804413      | 1271.575000       | 636.291138       | 1270.590984    | 635.799130       | 13 |
| 3  | 288.155397        | 144.581336      |                |                  | 270.144832        | 135.576054       | S    | <b>1187.553870</b> | 594.280573      | 1170.527321       | 585.767299       | 1169.543305    | 585.275291       | 12 |
| 4  | 375.187425        | 188.097351      |                |                  | 357.176860        | 179.092068       | S    | <b>1100.521842</b> | 550.764559      | 1083.495293       | 542.251285       | 1082.511277    | 541.759277       | 11 |
| 5  | <b>504.230018</b> | 252.618647      |                |                  | <b>486.219453</b> | 243.613365       | E    | <b>1013.489814</b> | 507.248545      | 996.463265        | 498.735271       | 995.479249     | 498.243263       | 10 |
| 6  | 601.282782        | 301.145029      |                |                  | 583.272217        | 292.139747       | P    | <b>884.447221</b>  | 442.727249      | <b>867.420672</b> | 434.213974       | 866.436656     | 433.721966       | 9  |
| 7  | 698.335546        | 349.671411      |                |                  | 680.324981        | 340.666129       | P    | <b>787.394457</b>  | 394.200867      | 770.367908        | 385.687592       | 769.383892     | 385.195584       | 8  |
| 8  | 812.378473        | 406.692875      | 795.351924     | 398.179600       | 794.367908        | 397.687592       | N    | 690.341693         | 345.674485      | 673.315144        | 337.161210       | 672.331128     | 336.669202       | 7  |
| 9  | 909.431237        | 455.219257      | 892.404688     | 446.705982       | 891.420672        | 446.213974       | P    | <b>576.298766</b>  | 288.653021      | 559.272217        | 280.139747       | 558.288201     | 279.647739       | 6  |
| 10 | 980.468351        | 490.737814      | 963.441802     | 482.224539       | 962.457786        | 481.732531       | A    | <b>479.246002</b>  | 240.126639      | 462.219453        | 231.613365       | 461.235437     | 231.121357       | 5  |
| 11 | 1067.500379       | 534.253828      | 1050.473830    | 525.740553       | 1049.489814       | 525.248545       | S    | <b>408.208888</b>  | 204.608082      | 391.182339        | 196.094808       | 390.198323     | 195.602800       | 4  |
| 12 | 1154.532407       | 577.769842      | 1137.505858    | 569.256567       | 1136.521842       | 568.764559       | S    | 321.176860         | 161.092068      | 304.150311        | 152.578794       | 303.166295     | 152.086786       | 3  |
| 13 | 1241.564435       | 621.285856      | 1224.537886    | 612.772581       | 1223.553870       | 612.280573       | S    | 234.144832         | 117.576054      | 217.118283        | 109.062780       | 216.134267     | 108.570772       | 2  |
| 14 |                   |                 |                |                  |                   |                  | K    | 147.112804         | 74.060040       | 130.086255        | 65.546765        |                |                  | 1  |

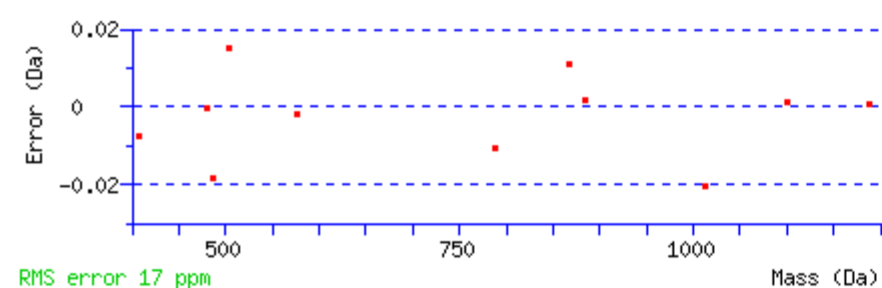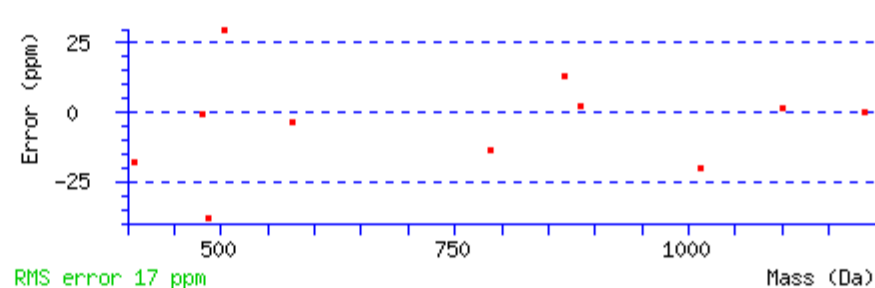

NCBI BLAST search of [VTSEPPNPASSSK](#)

(Parameters: blastp, nr protein database, expect=20000, no filter, PAM30)

Other BLAST [web gateways](#)

## All matches to this query

| Score | Mr(calc):   | Delta     | Sequence                        |
|-------|-------------|-----------|---------------------------------|
| 43.0  | 1386.662674 | 0.001014  | <a href="#">VTSEPPNPASSSK</a>   |
| 18.2  | 1386.656143 | 0.007545  | <a href="#">RTPPNCAEDIK</a>     |
| 18.2  | 1386.656143 | 0.007545  | <a href="#">RTPPNCAEDIK</a>     |
| 6.5   | 1386.656143 | 0.007545  | <a href="#">RTINSSQEPAPGM</a>   |
| 4.5   | 1386.673920 | -0.010232 | <a href="#">KPSDGSPTDKPSR</a>   |
| 3.8   | 1386.667587 | -0.003899 | <a href="#">VASFVAMAGQFLM</a>   |
| 3.2   | 1386.664001 | -0.000313 | <a href="#">FNNPATAAPNSQR</a>   |
| 3.0   | 1386.667587 | -0.003899 | <a href="#">VASFVAMAGQFLM</a>   |
| 1.3   | 1386.662689 | 0.000999  | <a href="#">EPASPAPTPTSLR</a>   |
| 1.2   | 1386.656158 | 0.007530  | <a href="#">ELAAMGPGASGDGVR</a> |

# MASCOT SCIENCE Mascot Search Results

## Peptide View

MS/MS Fragmentation of **FLIPDIK**

Found in **UD3A1\_HUMAN**, UDP-glucuronosyltransferase 3A1 OS=Homo sapiens GN=UGT3A1 PE=2 SV=1

Match to Query 79336: 860.506388 from(431.260470,2+) rtinseconds(1825) index(752303)

Title: Locus:1.1.1.1039.7

Data file C:\Program Files (x86)\Matrix Science\Mascot Daemon\mgf3 TFD - Epitel - R2\mascot\_daemon\_merge.mgf

Click mouse within plot area to zoom in by factor of two about that point

Or, Plot from  to  Da

Label all possible matches  Label matches used for scoring

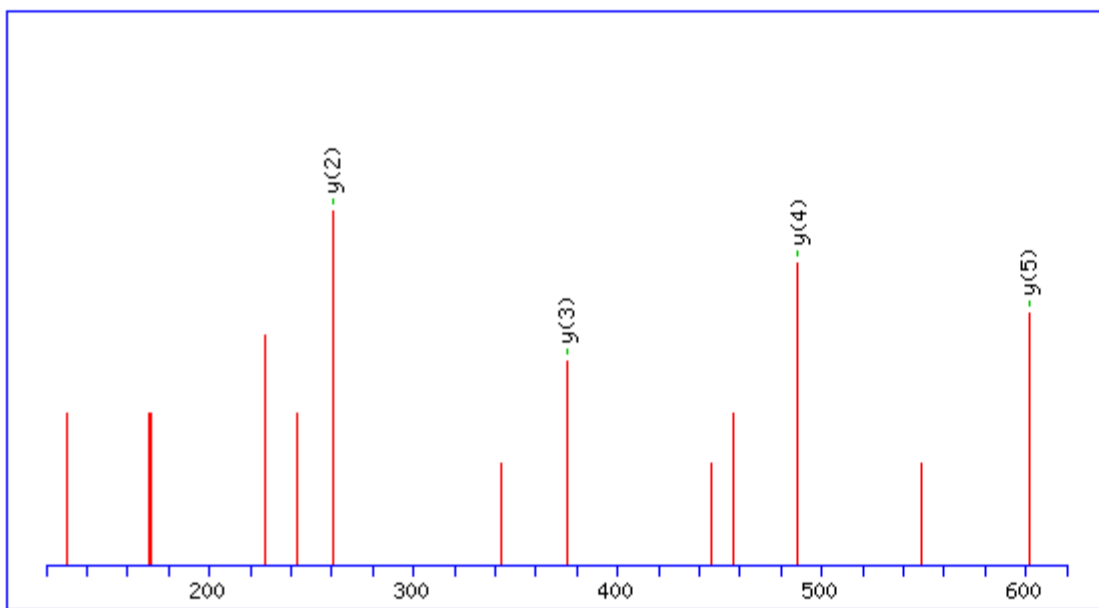

Monoisotopic mass of neutral peptide  $M_r(\text{calc})$ : 860.500748

Fixed modifications: Carbamidomethyl (C) (apply to specified residues or termini only)

Variable modifications:

P4 : Oxidation (P)

Ions Score: 34 Expect: 0.0022

Matches : 4/48 fragment ions using 5 most intense peaks ([help](#))

| # | b          | b <sup>++</sup> | b <sup>0</sup> | b <sup>0++</sup> | Seq. | y                 | y <sup>++</sup> | y <sup>*</sup> | y <sup>*++</sup> | y <sup>0</sup> | y <sup>0++</sup> | # |
|---|------------|-----------------|----------------|------------------|------|-------------------|-----------------|----------------|------------------|----------------|------------------|---|
| 1 | 148.075690 | 74.541483       |                |                  | F    |                   |                 |                |                  |                |                  | 7 |
| 2 | 261.159754 | 131.083515      |                |                  | L    | 714.439618        | 357.723447      | 697.413069     | 349.210173       | 696.429053     | 348.718165       | 6 |
| 3 | 374.243818 | 187.625547      |                |                  | I    | <b>601.355554</b> | 301.181415      | 584.329005     | 292.668141       | 583.344989     | 292.176133       | 5 |
| 4 | 487.291497 | 244.149386      |                |                  | P    | <b>488.271490</b> | 244.639383      | 471.244941     | 236.126108       | 470.260925     | 235.634100       | 4 |
| 5 | 602.318440 | 301.662858      | 584.307875     | 292.657576       | D    | <b>375.223811</b> | 188.115543      | 358.197262     | 179.602269       | 357.213246     | 179.110261       | 3 |
| 6 | 715.402504 | 358.204890      | 697.391939     | 349.199608       | I    | <b>260.196868</b> | 130.602072      | 243.170319     | 122.088798       |                |                  | 2 |
| 7 |            |                 |                |                  | K    | 147.112804        | 74.060040       | 130.086255     | 65.546765        |                |                  | 1 |

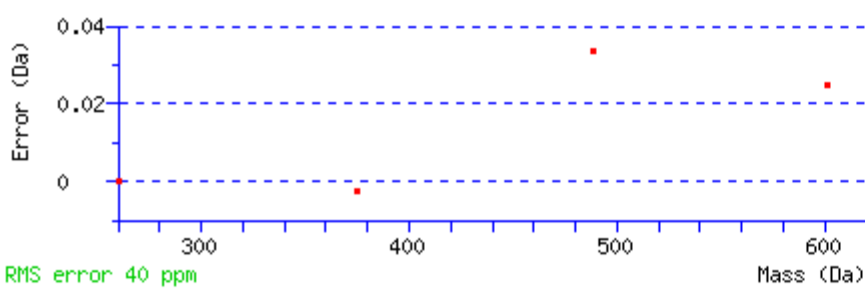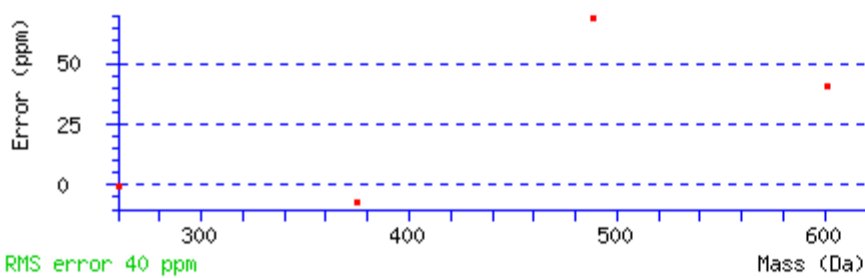

NCBI BLAST search of [FLIPDIK](#)

(Parameters: blastp, nr protein database, expect=20000, no filter, PAM30)

Other BLAST [web gateways](#)

## All matches to this query

| Score | $M_r(\text{calc})$ : | Delta     | Sequence                |
|-------|----------------------|-----------|-------------------------|
| 34.3  | 860.500748           | 0.005640  | <a href="#">FLIPDIK</a> |
| 19.5  | 860.500748           | 0.005640  | <a href="#">LFPDILK</a> |
| 18.6  | 860.504105           | 0.002283  | <a href="#">MILDLLK</a> |
| 18.6  | 860.504105           | 0.002283  | <a href="#">MLLDILK</a> |
| 17.8  | 860.500748           | 0.005640  | <a href="#">FPLLVEK</a> |
| 17.8  | 860.511978           | -0.005590 | <a href="#">LFLPLSR</a> |
| 17.8  | 860.511963           | -0.005575 | <a href="#">YPLLISR</a> |
| 11.0  | 860.504105           | 0.002283  | <a href="#">LILMDLK</a> |
| 10.1  | 860.500748           | 0.005640  | <a href="#">LDFLPLK</a> |
| 3.4   | 860.504105           | 0.002283  | <a href="#">LLDLIMK</a> |



# **MATRIX** SCIENCE Mascot Search Results

## Peptide View

MS/MS Fragmentation of **KPPAIPR**

Found in **S35B4\_HUMAN**, UDP-xylose and UDP-N-acetylglucosamine transporter OS=Homo sapiens GN=SLC35B4 PE=2 SV=1

Match to Query 158091: 922.557688 from(462.286120,2+) rtinseconds(1134) index(739948)

Title: Locus:1.1.1.772.10

Data file C:\Program Files (x86)\Matrix Science\Mascot Daemon\mgf3 TFD - Epitel - R2\mascot\_daemon\_merge.mgf

Click mouse within plot area to zoom in by factor of two about that point

Or,   to  Da

Label all possible matches  Label matches used for scoring

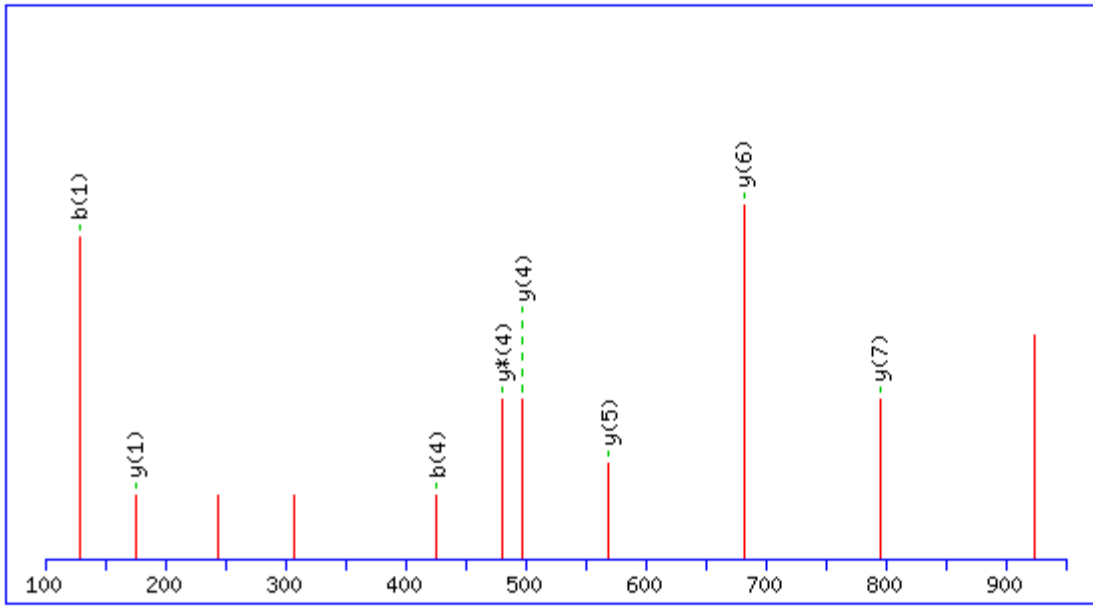

Monoisotopic mass of neutral peptide Mr(calc): 922.559982

Fixed modifications: Carbamidomethyl (C) (apply to specified residues or termini only)

Variable modifications:

P2 : Oxidation (P)

P3 : Oxidation (P)

Ions Score: 45 Expect: 0.0001

Matches : 8/56 fragment ions using 10 most intense peaks ([help](#))

| # | b                 | b <sup>++</sup> | b <sup>*</sup> | b <sup>*++</sup> | Seq.     | y                 | y <sup>++</sup> | y <sup>*</sup>    | y <sup>*++</sup> | #        |
|---|-------------------|-----------------|----------------|------------------|----------|-------------------|-----------------|-------------------|------------------|----------|
| 1 | <b>129.102239</b> | 65.054757       | 112.075690     | 56.541483        | <b>K</b> |                   |                 |                   |                  | <b>8</b> |
| 2 | 242.149918        | 121.578597      | 225.123369     | 113.065322       | <b>P</b> | <b>795.472316</b> | 398.239796      | 778.445767        | 389.726522       | <b>7</b> |
| 3 | 355.197597        | 178.102436      | 338.171048     | 169.589162       | <b>P</b> | <b>682.424637</b> | 341.715957      | 665.398088        | 333.202682       | <b>6</b> |
| 4 | <b>426.234711</b> | 213.620994      | 409.208162     | 205.107719       | <b>A</b> | <b>569.376958</b> | 285.192117      | 552.350409        | 276.678843       | <b>5</b> |
| 5 | 539.318775        | 270.163026      | 522.292226     | 261.649751       | <b>I</b> | <b>498.339844</b> | 249.673560      | <b>481.313295</b> | 241.160285       | <b>4</b> |
| 6 | 636.371539        | 318.689408      | 619.344990     | 310.176133       | <b>P</b> | 385.255780        | 193.131528      | 368.229231        | 184.618253       | <b>3</b> |
| 7 | 749.455603        | 375.231440      | 732.429054     | 366.718165       | <b>I</b> | 288.203016        | 144.605146      | 271.176467        | 136.091871       | <b>2</b> |
| 8 |                   |                 |                |                  | <b>R</b> | <b>175.118952</b> | 88.063114       | 158.092403        | 79.549839        | <b>1</b> |

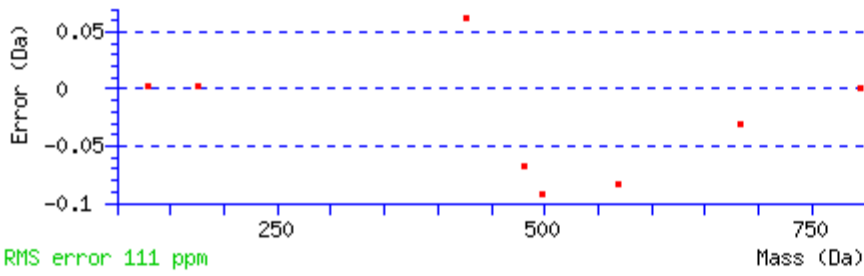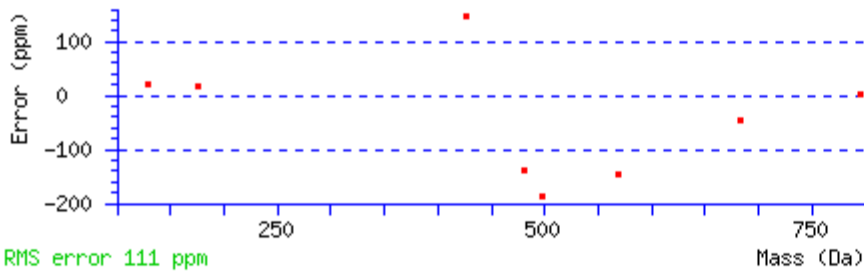

NCBI BLAST search of [KPPAIPR](#)

(Parameters: blastp, nr protein database, expect=20000, no filter, PAM30)

Other BLAST [web gateways](#)

### All matches to this query

| Score | Mr(calc):  | Delta     | Sequence                  |
|-------|------------|-----------|---------------------------|
| 45.4  | 922.559982 | -0.002294 | <a href="#">KPPAIPR</a>   |
| 21.9  | 922.559982 | -0.002294 | <a href="#">QILPPLAR</a>  |
| 21.9  | 922.559982 | -0.002294 | <a href="#">QILPPLAR</a>  |
| 15.9  | 922.559967 | -0.002279 | <a href="#">KLIPNPNK</a>  |
| 15.9  | 922.559982 | -0.002294 | <a href="#">KLLHGDIK</a>  |
| 12.2  | 922.548767 | 0.008921  | <a href="#">AGLVLPPP</a>  |
| 11.9  | 922.559982 | -0.002294 | <a href="#">KLTSHLPK</a>  |
| 11.9  | 922.559982 | -0.002294 | <a href="#">KPPAIPR</a>   |
| 5.3   | 922.548752 | 0.008936  | <a href="#">AGLVIPPEK</a> |
| 4.6   | 922.548767 | 0.008921  | <a href="#">AGLVLPPP</a>  |

# MASCOT SEARCH RESULTS

## Peptide View

### MS/MS Fragmentation of **QLVEEIRK**

Found in **CJ118\_HUMAN**, Uncharacterized protein C10orf118 OS=Homo sapiens GN=C10orf118 PE=2 SV=2

Match to Query 16099: 1013.589208 from(507.801880,2+) rtinseconds(1375) index(10237)

Title: Locus:1.1.1.1956.28

Data file 2011-11-10 - TFD - EP 3-1.mgf

Click mouse within plot area to zoom in by factor of two about that point

Or, Plot from  to  Da

Label all possible matches  Label matches used for scoring

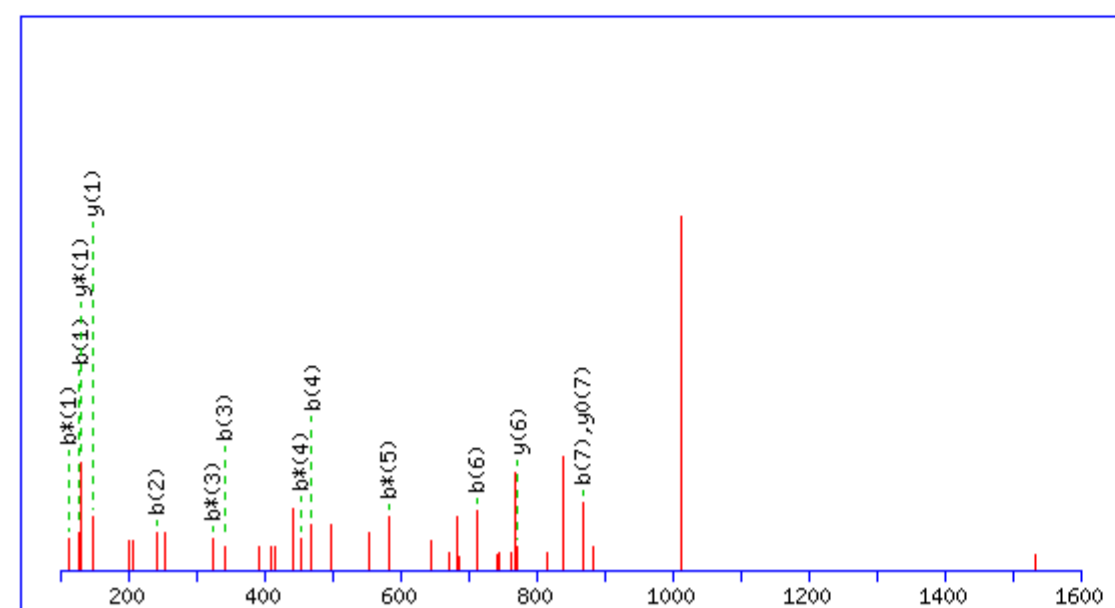

Monoisotopic mass of neutral peptide Mr(calc): 1013.586914

Fixed modifications: Propionamide (C) (apply to specified residues or termini only)

Ions Score: 32 Expect: 0.0071

Matches : 14/72 fragment ions using 29 most intense peaks [\(help\)](#)

| # | b                 | b <sup>++</sup> | b <sup>*</sup>    | b <sup>***</sup> | b <sup>0</sup> | b <sup>0++</sup> | Seq. | y                 | y <sup>++</sup> | y <sup>*</sup>    | y <sup>***</sup> | y <sup>0</sup>    | y <sup>0++</sup> | # |
|---|-------------------|-----------------|-------------------|------------------|----------------|------------------|------|-------------------|-----------------|-------------------|------------------|-------------------|------------------|---|
| 1 | <b>129.065854</b> | 65.036565       | <b>112.039305</b> | 56.523291        |                |                  | Q    |                   |                 |                   |                  |                   |                  | 8 |
| 2 | <b>242.149918</b> | 121.578597      | 225.123369        | 113.065323       |                |                  | L    | 886.535643        | 443.771460      | 869.509094        | 435.258185       | <b>868.525078</b> | 434.766177       | 7 |
| 3 | <b>341.218332</b> | 171.112804      | <b>324.191783</b> | 162.599530       |                |                  | V    | <b>773.451579</b> | 387.229428      | 756.425030        | 378.716153       | 755.441014        | 378.224145       | 6 |
| 4 | <b>470.260925</b> | 235.634101      | <b>453.234376</b> | 227.120826       | 452.250360     | 226.628818       | E    | 674.383165        | 337.695221      | 657.356616        | 329.181946       | 656.372600        | 328.689938       | 5 |
| 5 | 599.303518        | 300.155397      | <b>582.276969</b> | 291.642123       | 581.292953     | 291.150115       | E    | 545.340572        | 273.173924      | 528.314023        | 264.660650       | 527.330007        | 264.168642       | 4 |
| 6 | <b>712.387582</b> | 356.697429      | 695.361033        | 348.184155       | 694.377017     | 347.692147       | I    | 416.297979        | 208.652628      | 399.271430        | 200.139353       |                   |                  | 3 |
| 7 | <b>868.488693</b> | 434.747985      | 851.462144        | 426.234710       | 850.478128     | 425.742702       | R    | 303.213915        | 152.110596      | 286.187366        | 143.597321       |                   |                  | 2 |
| 8 |                   |                 |                   |                  |                |                  | K    | <b>147.112804</b> | 74.060040       | <b>130.086255</b> | 65.546765        |                   |                  | 1 |

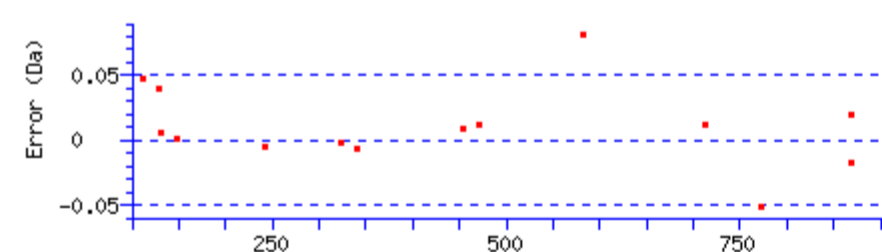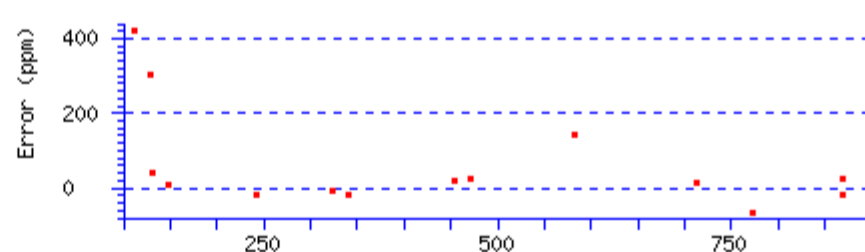

### NCBI BLAST search of **QLVEEIRK**

(Parameters: blastp, nr protein database, expect=20000, no filter, PAM30)

Other BLAST [web gateways](#)

### All matches to this query

| Score | Mr(calc):   | Delta     | Sequence                   |
|-------|-------------|-----------|----------------------------|
| 31.9  | 1013.586914 | 0.002294  | <a href="#">QLVEEIRK</a>   |
| 23.6  | 1013.586914 | 0.002294  | <a href="#">LRAEIEGVK</a>  |
| 17.1  | 1013.586945 | 0.002263  | <a href="#">AGLVQNVVSK</a> |
| 16.2  | 1013.594315 | -0.005107 | <a href="#">IKMLPTPAK</a>  |
| 15.7  | 1013.586914 | 0.002294  | <a href="#">IKVEELQR</a>   |
| 14.4  | 1013.598160 | -0.008952 | <a href="#">KIQTQLQR</a>   |
| 13.6  | 1013.586914 | 0.002294  | <a href="#">KPREELVK</a>   |
| 11.7  | 1013.598175 | -0.008967 | <a href="#">QLGVNIVRK</a>  |
| 11.7  | 1013.586914 | 0.002294  | <a href="#">EVIQLKER</a>   |
| 11.1  | 1013.586914 | 0.002294  | <a href="#">QLKELDLR</a>   |

# Mascot Search Results

## Peptide View

### MS/MS Fragmentation of QLADIGYK

Found in **CL062\_HUMAN**, Uncharacterized protein C12orf62 OS=Homo sapiens GN=C12orf62 PE=2 SV=1

Match to Query 6564: 906.488828 from(454.251690,2+) rtinseconds(1824) index(7460)

Title: Locus:1.1.1.2330.19

Data file 2011-11-12 - TFD - EP 5-8.mgf

Click mouse within plot area to zoom in by factor of two about that point

Or, Plot from  to  Da

Label all possible matches  Label matches used for scoring

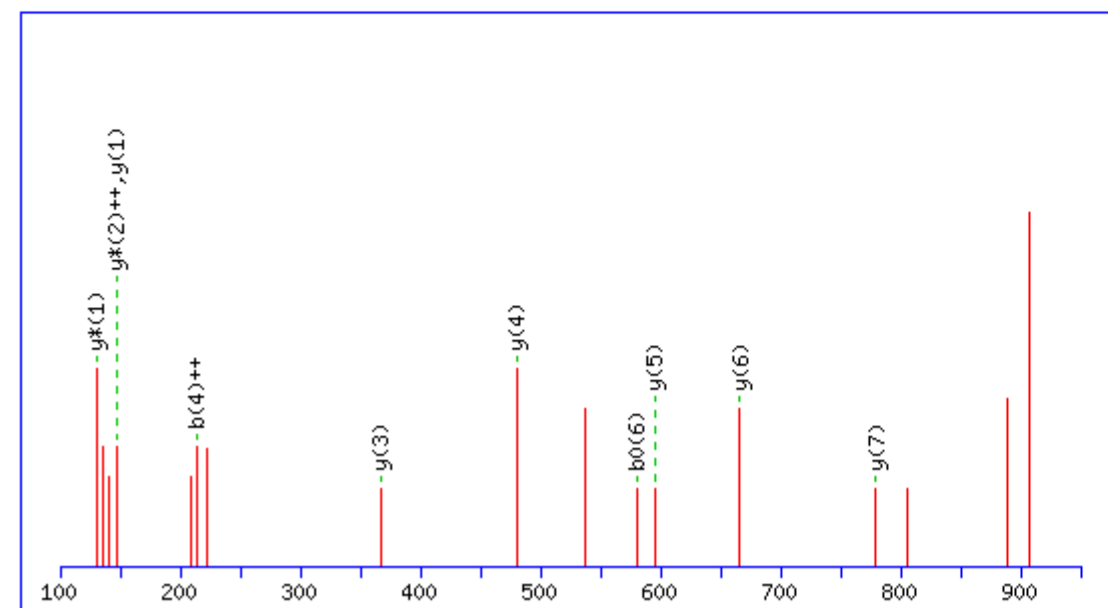

Monoisotopic mass of neutral peptide Mr(calc): 906.481064

Fixed modifications: Propionamide (C) (apply to specified residues or termini only)

Ions Score: 47 Expect: 0.00022

Matches : 10/70 fragment ions using 13 most intense peaks [\(help\)](#)

| # | b          | b <sup>++</sup> | b <sup>*</sup> | b <sup>***</sup> | b <sup>0</sup> | b <sup>0++</sup> | Seq. | y          | y <sup>++</sup> | y <sup>*</sup> | y <sup>***</sup> | y <sup>0</sup> | y <sup>0++</sup> | # |
|---|------------|-----------------|----------------|------------------|----------------|------------------|------|------------|-----------------|----------------|------------------|----------------|------------------|---|
| 1 | 129.065854 | 65.036565       | 112.039305     | 56.523291        |                |                  | Q    |            |                 |                |                  |                |                  | 8 |
| 2 | 242.149918 | 121.578597      | 225.123369     | 113.065323       |                |                  | L    | 779.429782 | 390.218529      | 762.403233     | 381.705255       | 761.419217     | 381.213247       | 7 |
| 3 | 313.187032 | 157.097154      | 296.160483     | 148.583879       |                |                  | A    | 666.345718 | 333.676497      | 649.319169     | 325.163223       | 648.335153     | 324.671215       | 6 |
| 4 | 428.213975 | 214.610626      | 411.187426     | 206.097351       | 410.203410     | 205.605343       | D    | 595.308604 | 298.157940      | 578.282055     | 289.644666       | 577.298039     | 289.152658       | 5 |
| 5 | 541.298039 | 271.152658      | 524.271490     | 262.639383       | 523.287474     | 262.147375       | I    | 480.281661 | 240.644468      | 463.255112     | 232.131194       |                |                  | 4 |
| 6 | 598.319503 | 299.663390      | 581.292954     | 291.150115       | 580.308938     | 290.658107       | G    | 367.197597 | 184.102436      | 350.171048     | 175.589162       |                |                  | 3 |
| 7 | 761.382832 | 381.195054      | 744.356283     | 372.681780       | 743.372267     | 372.189772       | Y    | 310.176133 | 155.591704      | 293.149584     | 147.078430       |                |                  | 2 |
| 8 |            |                 |                |                  |                |                  | K    | 147.112804 | 74.060040       | 130.086255     | 65.546765        |                |                  | 1 |

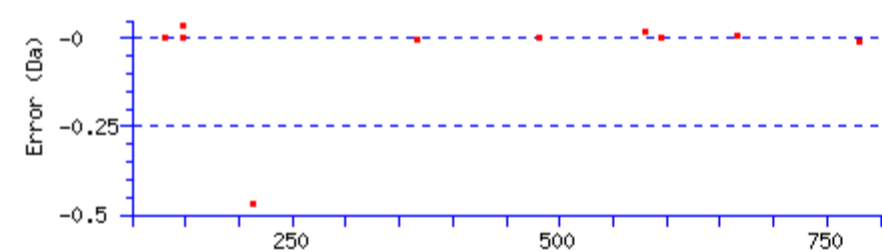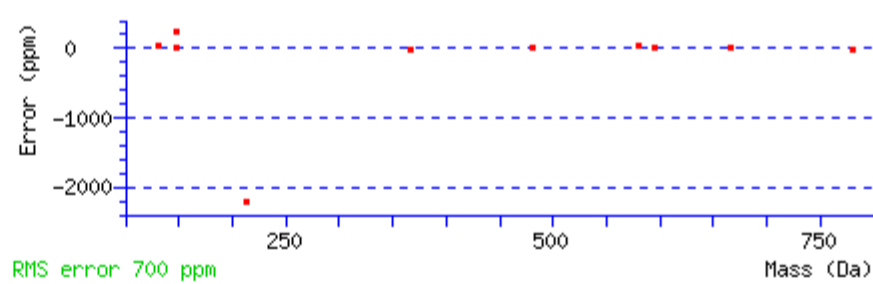

### NCBI BLAST search of QLADIGYK

(Parameters: blastp, nr protein database, expect=20000, no filter, PAM30)

Other BLAST [web gateways](#)

### All matches to this query

| Score | Mr(calc):  | Delta     | Sequence                  |
|-------|------------|-----------|---------------------------|
| 47.3  | 906.481064 | 0.007764  | <a href="#">QLADIGYK</a>  |
| 20.1  | 906.492279 | -0.003451 | <a href="#">QLAEYRK</a>   |
| 19.5  | 906.492310 | -0.003482 | <a href="#">AGLGAVYTR</a> |
| 15.8  | 906.492294 | -0.003466 | <a href="#">QLKESFR</a>   |
| 11.2  | 906.481079 | 0.007749  | <a href="#">AQLDSFVK</a>  |
| 11.2  | 906.484451 | 0.004377  | <a href="#">QVLSVMSK</a>  |
| 10.3  | 906.481049 | 0.007779  | <a href="#">KLFEENK</a>   |
| 10.3  | 906.484436 | 0.004392  | <a href="#">KLISDMGK</a>  |
| 10.3  | 906.481049 | 0.007779  | <a href="#">KPLNYEK</a>   |
| 10.3  | 906.492294 | -0.003466 | <a href="#">KPREFSK</a>   |

# MASCOT SCIENCE Mascot Search Results

## Peptide View

MS/MS Fragmentation of **LLEPALR**

Found in **CA087\_HUMAN**, Uncharacterized protein C1orf87 OS=Homo sapiens GN=C1orf87 PE=2 SV=1

Match to Query 35232: 826.492508 from(414.253530,2+) rtinseconds(1811) index(672838)

Title: Locus:1.1.1.1358.5

Data file C:\Program Files (x86)\Matrix Science\Mascot Daemon\mgf3 TFD - Epitel - R2\mascot\_daemon\_merge.mgf

Click mouse within plot area to zoom in by factor of two about that point

Or, Plot from  to  Da

Label all possible matches  Label matches used for scoring

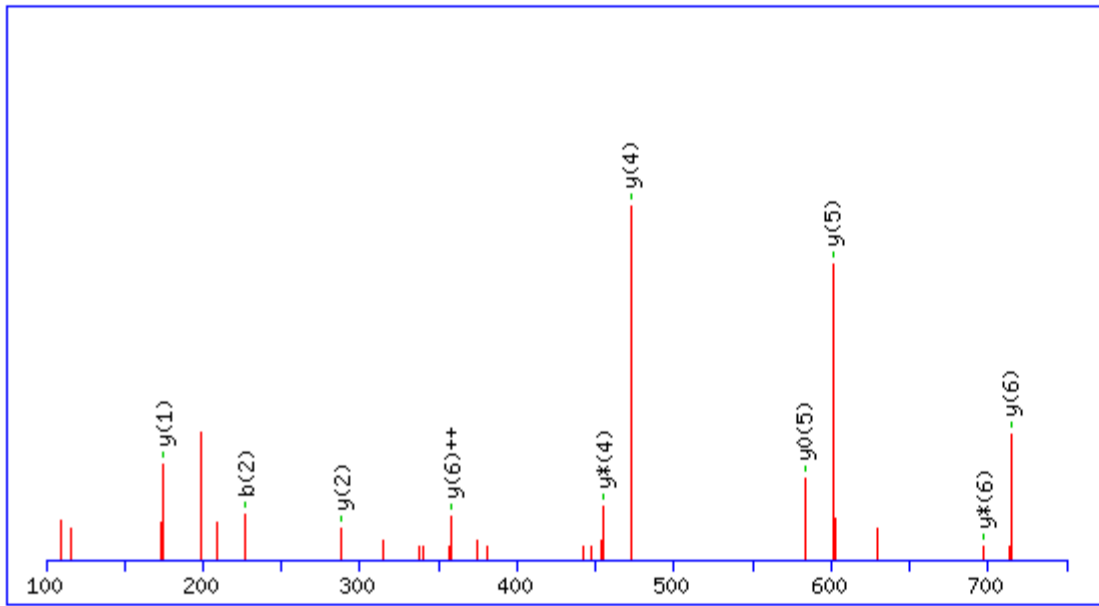

Monoisotopic mass of neutral peptide  $M_r(\text{calc})$ : 826.491226

Fixed modifications: Carbamidomethyl (C) (apply to specified residues or termini only)

Variable modifications:

P4 : Oxidation (P)

Ions Score: 36 Expect: 0.0011

Matches : 10/48 fragment ions using 14 most intense peaks [\(help\)](#)

| # | b          | b <sup>++</sup> | b <sup>0</sup> | b <sup>0++</sup> | Seq. | y          | y <sup>++</sup> | y <sup>*</sup> | y <sup>*++</sup> | y <sup>0</sup> | y <sup>0++</sup> | # |
|---|------------|-----------------|----------------|------------------|------|------------|-----------------|----------------|------------------|----------------|------------------|---|
| 1 | 114.091340 | 57.549308       |                |                  | L    |            |                 |                |                  |                |                  | 7 |
| 2 | 227.175404 | 114.091340      |                |                  | L    | 714.414466 | 357.710871      | 697.387917     | 349.197597       | 696.403901     | 348.705589       | 6 |
| 3 | 356.217997 | 178.612637      | 338.207432     | 169.607354       | E    | 601.330402 | 301.168839      | 584.303853     | 292.655565       | 583.319837     | 292.163557       | 5 |
| 4 | 469.265676 | 235.136476      | 451.255111     | 226.131194       | P    | 472.287809 | 236.647542      | 455.261260     | 228.134268       |                |                  | 4 |
| 5 | 540.302790 | 270.655033      | 522.292225     | 261.649751       | A    | 359.240130 | 180.123703      | 342.213581     | 171.610428       |                |                  | 3 |
| 6 | 653.386854 | 327.197065      | 635.376289     | 318.191783       | L    | 288.203016 | 144.605146      | 271.176467     | 136.091871       |                |                  | 2 |
| 7 |            |                 |                |                  | R    | 175.118952 | 88.063114       | 158.092403     | 79.549839        |                |                  | 1 |

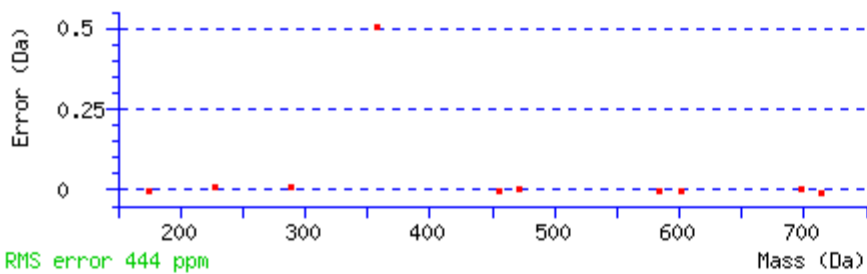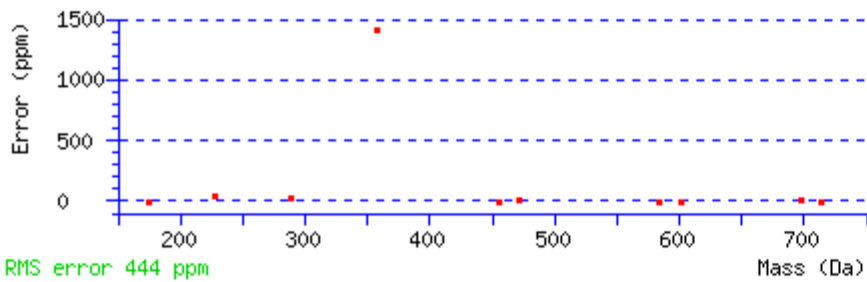

NCBI BLAST search of [LLEPALR](#)

(Parameters: blastp, nr protein database, expect=20000, no filter, PAM30)

Other BLAST [web gateways](#)

## All matches to this query

| Score | $M_r(\text{calc})$ | Delta    | Sequence                 |
|-------|--------------------|----------|--------------------------|
| 36.0  | 826.491226         | 0.001282 | <a href="#">LLEPALR</a>  |
| 24.0  | 826.491226         | 0.001282 | <a href="#">LELPLSR</a>  |
| 20.0  | 826.491241         | 0.001267 | <a href="#">LIPSPLR</a>  |
| 20.0  | 826.491226         | 0.001282 | <a href="#">LPLEALR</a>  |
| 20.0  | 826.491257         | 0.001251 | <a href="#">LPTPVLRL</a> |
| 12.2  | 826.491241         | 0.001267 | <a href="#">ILGPGLNK</a> |
| 10.5  | 826.491226         | 0.001282 | <a href="#">LLSPER</a>   |
| 10.5  | 826.491241         | 0.001267 | <a href="#">ILTPEVRL</a> |
| 10.5  | 826.491257         | 0.001251 | <a href="#">IPVVVER</a>  |
| 9.7   | 826.491226         | 0.001282 | <a href="#">EILSPLR</a>  |

# MASCOT Search Results

## Peptide View

MS/MS Fragmentation of **KPVVASSLK**

Found in **CB042\_HUMAN**, Uncharacterized protein C2orf42 OS=Homo sapiens GN=C2orf42 PE=2 SV=1

Match to Query 11375: 943.569288 from(472.791920,2+) rtinseconds(2137) index(25011)

Title: Locus:1.1.1.2245.15

Data file 2011-11-13 - TFD - EP 7-4.mgf

Click mouse within plot area to zoom in by factor of two about that point

Or, Plot from  to  Da

Label all possible matches  Label matches used for scoring

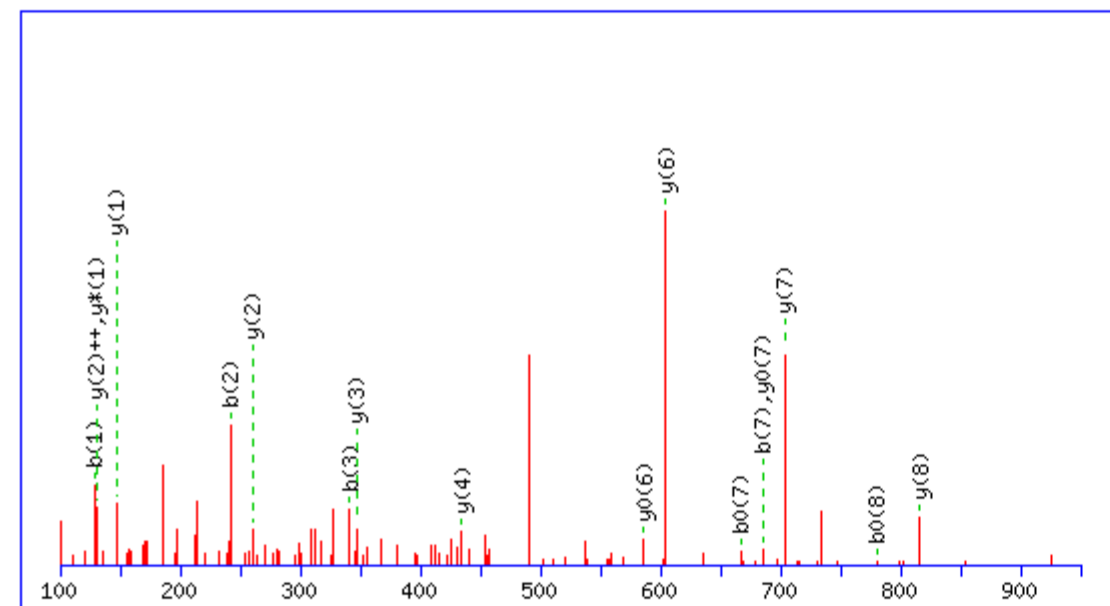

Monoisotopic mass of neutral peptide Mr(calc): 943.570221

Fixed modifications: Propionamide (C) (apply to specified residues or termini only)

Variable modifications:

P2 : Oxidation (P)

Ions Score: 45 Expect: 0.00014

Matches : 17/82 fragment ions using 33 most intense peaks ([help](#))

| # | b                 | b <sup>++</sup> | b <sup>*</sup> | b <sup>*++</sup> | b <sup>0</sup>    | b <sup>0++</sup> | Seq.     | y                 | y <sup>++</sup>   | y <sup>*</sup>    | y <sup>*++</sup> | y <sup>0</sup>    | y <sup>0++</sup> | #        |
|---|-------------------|-----------------|----------------|------------------|-------------------|------------------|----------|-------------------|-------------------|-------------------|------------------|-------------------|------------------|----------|
| 1 | <b>129.102239</b> | 65.054757       | 112.075690     | 56.541483        |                   |                  | <b>K</b> |                   |                   |                   |                  |                   |                  | <b>9</b> |
| 2 | <b>242.149918</b> | 121.578597      | 225.123369     | 113.065322       |                   |                  | <b>P</b> | <b>816.482545</b> | 408.744911        | 799.455996        | 400.231636       | 798.471980        | 399.739628       | <b>8</b> |
| 3 | <b>341.218332</b> | 171.112804      | 324.191783     | 162.599529       |                   |                  | <b>V</b> | <b>703.434866</b> | 352.221071        | 686.408317        | 343.707797       | <b>685.424301</b> | 343.215789       | <b>7</b> |
| 4 | 440.286746        | 220.647011      | 423.260197     | 212.133737       |                   |                  | <b>V</b> | <b>604.366452</b> | 302.686864        | 587.339903        | 294.173590       | <b>586.355887</b> | 293.681582       | <b>6</b> |
| 5 | 511.323860        | 256.165568      | 494.297311     | 247.652294       |                   |                  | <b>A</b> | 505.298038        | 253.152657        | 488.271489        | 244.639382       | 487.287473        | 244.147374       | <b>5</b> |
| 6 | 598.355888        | 299.681582      | 581.329339     | 291.168308       | 580.345323        | 290.676300       | <b>S</b> | <b>434.260924</b> | 217.634100        | 417.234375        | 209.120825       | 416.250359        | 208.628817       | <b>4</b> |
| 7 | <b>685.387916</b> | 343.197596      | 668.361367     | 334.684322       | <b>667.377351</b> | 334.192314       | <b>S</b> | <b>347.228896</b> | 174.118086        | 330.202347        | 165.604811       | 329.218331        | 165.112803       | <b>3</b> |
| 8 | 798.471980        | 399.739628      | 781.445431     | 391.226354       | <b>780.461415</b> | 390.734346       | <b>L</b> | <b>260.196868</b> | <b>130.602072</b> | 243.170319        | 122.088798       |                   |                  | <b>2</b> |
| 9 |                   |                 |                |                  |                   |                  | <b>K</b> | <b>147.112804</b> | 74.060040         | <b>130.086255</b> | 65.546765        |                   |                  | <b>1</b> |

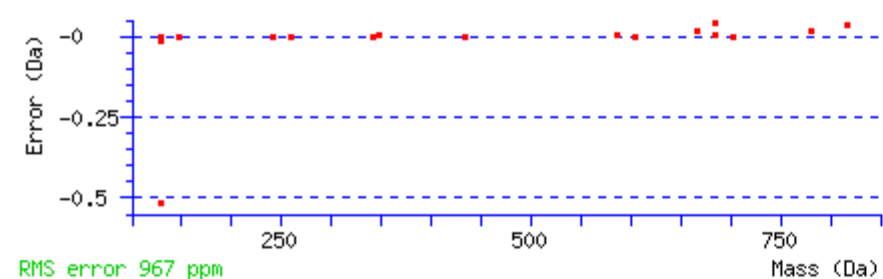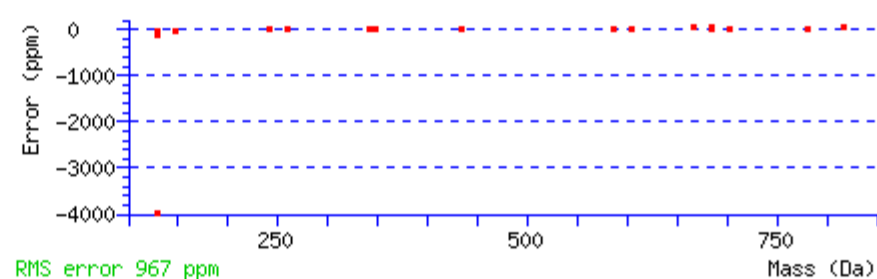

NCBI BLAST search of **KPVVASSLK**

(Parameters: blastp, nr protein database, expect=20000, no filter, PAM30)

Other BLAST [web gateways](#)

All matches to this query

| Score | Mr(calc):  | Delta     | Sequence                   |
|-------|------------|-----------|----------------------------|
| 55.9  | 943.570221 | -0.000933 | <a href="#">GALVLGSSLK</a> |
| 44.9  | 943.570221 | -0.000933 | <a href="#">KPVVASSLK</a>  |
| 15.9  | 943.570221 | -0.000933 | <a href="#">KLGSTLTPK</a>  |
| 9.3   | 943.570206 | -0.000918 | <a href="#">LQVESLKK</a>   |
| 9.1   | 943.570236 | -0.000948 | <a href="#">LGSTVGLVAK</a> |
| 9.0   | 943.570190 | -0.000902 | <a href="#">EKLINSLK</a>   |
| 8.7   | 943.570221 | -0.000933 | <a href="#">KVLVEQTK</a>   |
| 8.2   | 943.570221 | -0.000933 | <a href="#">TAPTSKVIK</a>  |
| 5.7   | 943.570221 | -0.000933 | <a href="#">KLLDVTQK</a>   |
| 5.6   | 943.570206 | -0.000918 | <a href="#">ESIQVKLK</a>   |

Mascot: <http://www.matrixscience.com/>

# MASCOT Search Results

## Peptide View

MS/MS Fragmentation of **MGIGWKPLAPIFPPLPK**

Found in **CB071\_HUMAN**, Uncharacterized protein C2orf71 OS=Homo sapiens GN=C2orf71 PE=1 SV=1

Match to Query 17039: 1909.040592 from(637.354140,3+) rtinseconds(2336) index(8932)

Title: Locus:1.1.1.2503.10

Data file 2011-11-10 - TFD - EP 4-8.mgf

Click mouse within plot area to zoom in by factor of two about that point

Or,   to  Da

Label all possible matches  Label matches used for scoring

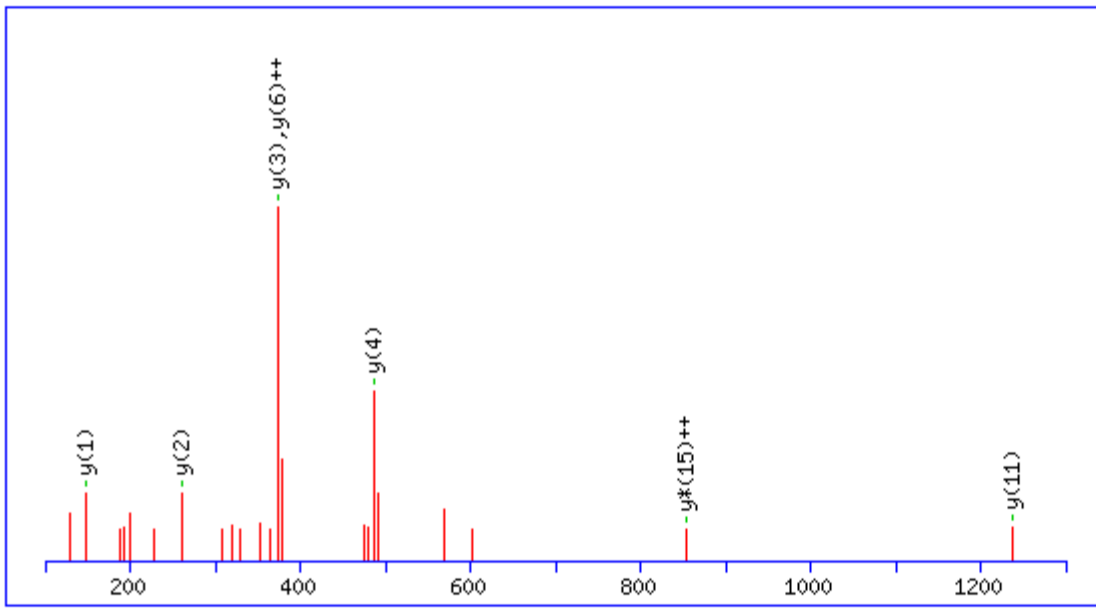

Monoisotopic mass of neutral peptide Mr(calc): 1909.053558

Fixed modifications: Propionamide (C) (apply to specified residues or termini only)

Variable modifications:

P13 : Oxidation (P)

P14 : Oxidation (P)

P16 : Oxidation (P)

Ions Score: 38 Expect: 0.0027

Matches : 7/118 fragment ions using 7 most intense peaks [\(help\)](#)

| #  | b           | b <sup>++</sup> | b*          | b <sup>*++</sup> | Seq. | y           | y <sup>++</sup> | y*          | y <sup>*++</sup> | #  |
|----|-------------|-----------------|-------------|------------------|------|-------------|-----------------|-------------|------------------|----|
| 1  | 132.047761  | 66.527518       |             |                  | M    |             |                 |             |                  | 17 |
| 2  | 189.069225  | 95.038250       |             |                  | G    | 1779.020357 | 890.013816      | 1761.993808 | 881.500542       | 16 |
| 3  | 302.153289  | 151.580282      |             |                  | I    | 1721.998893 | 861.503085      | 1704.972344 | 852.989810       | 15 |
| 4  | 359.174753  | 180.091014      |             |                  | G    | 1608.914829 | 804.961052      | 1591.888280 | 796.447778       | 14 |
| 5  | 545.254066  | 273.130671      |             |                  | W    | 1551.893365 | 776.450320      | 1534.866816 | 767.937046       | 13 |
| 6  | 673.349029  | 337.178153      | 656.322480  | 328.664878       | K    | 1365.814052 | 683.410664      | 1348.787503 | 674.897390       | 12 |
| 7  | 770.401793  | 385.704535      | 753.375244  | 377.191260       | P    | 1237.719089 | 619.363182      | 1220.692540 | 610.849908       | 11 |
| 8  | 883.485857  | 442.246567      | 866.459308  | 433.733292       | L    | 1140.666325 | 570.836800      | 1123.639776 | 562.323526       | 10 |
| 9  | 954.522971  | 477.765124      | 937.496422  | 469.251849       | A    | 1027.582261 | 514.294769      | 1010.555712 | 505.781494       | 9  |
| 10 | 1051.575735 | 526.291505      | 1034.549186 | 517.778231       | P    | 956.545147  | 478.776211      | 939.518598  | 470.262937       | 8  |
| 11 | 1164.659799 | 582.833537      | 1147.633250 | 574.320263       | I    | 859.492383  | 430.249830      | 842.465834  | 421.736555       | 7  |
| 12 | 1311.728213 | 656.367744      | 1294.701664 | 647.854470       | F    | 746.408319  | 373.707798      | 729.381770  | 365.194523       | 6  |
| 13 | 1424.775892 | 712.891584      | 1407.749343 | 704.378310       | P    | 599.339905  | 300.173591      | 582.313356  | 291.660316       | 5  |
| 14 | 1537.823571 | 769.415423      | 1520.797022 | 760.902149       | P    | 486.292226  | 243.649751      | 469.265677  | 235.136476       | 4  |
| 15 | 1650.907635 | 825.957455      | 1633.881086 | 817.444181       | L    | 373.244547  | 187.125911      | 356.217998  | 178.612637       | 3  |
| 16 | 1763.955314 | 882.481295      | 1746.928765 | 873.968020       | P    | 260.160483  | 130.583879      | 243.133934  | 122.070605       | 2  |
| 17 |             |                 |             |                  | K    | 147.112804  | 74.060040       | 130.086255  | 65.546765        | 1  |

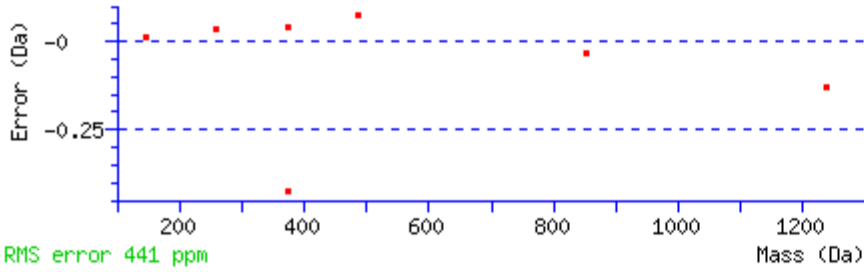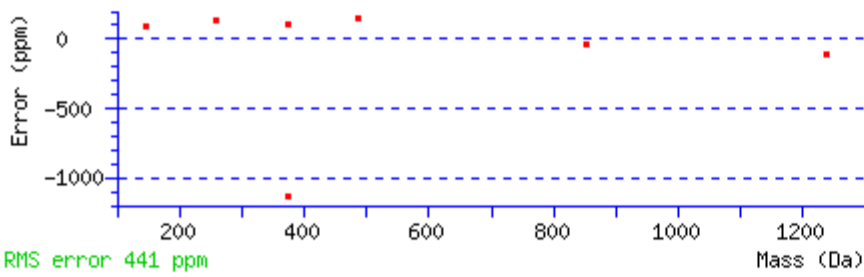

NCBI BLAST search of [MGIGWKPLAPIFPPLPK](#)

(Parameters: blastp, nr protein database, expect=20000, no filter, PAM30)

Other BLAST [web gateways](#)

## All matches to this query

| Score | Mr(calc):   | Delta     | Sequence                          |
|-------|-------------|-----------|-----------------------------------|
| 38.2  | 1909.053558 | -0.012966 | <a href="#">MGIGWKPLAPIFPPLPK</a> |
| 38.2  | 1909.053558 | -0.012966 | <a href="#">MGIGWKPLAPIFPPLPK</a> |
| 38.2  | 1909.053558 | -0.012966 | <a href="#">MGIGWKPLAPIFPPLPK</a> |
| 23.7  | 1909.053558 | -0.012966 | <a href="#">MGIGWKPLAPIFPPLPK</a> |
| 23.7  | 1909.053558 | -0.012966 | <a href="#">MGIGWKPLAPIFPPLPK</a> |
| 23.7  | 1909.053558 | -0.012966 | <a href="#">MGIGWKPLAPIFPPLPK</a> |
| 21.6  | 1909.053558 | -0.012966 | <a href="#">MGIGWKPLAPIFPPLPK</a> |
| 15.4  | 1909.028381 | 0.012211  | <a href="#">NVFHYLMAFLRELLK</a>   |
| 10.8  | 1909.034241 | 0.006351  | <a href="#">QMIKLTQEHEALLDK</a>   |
| 8.0   | 1909.053558 | -0.012966 | <a href="#">MGIGWKPLAPIFPPLPK</a> |

# MASCOT Search Results

## Peptide View

MS/MS Fragmentation of **VITAQPPK**

Found in **CC024\_HUMAN**, Uncharacterized protein C3orf24 OS=Homo sapiens GN=C3orf24 PE=2 SV=1

Match to Query 6794: 884.498548 from(443.256550,2+) rtinseconds(2213) index(25368)

Title: Locus:1.1.1.2134.6

Data file 2011-11-12 - TFD - EP 6-5.mgf

Click mouse within plot area to zoom in by factor of two about that point

Or, Plot from  to  Da

Label all possible matches  Label matches used for scoring

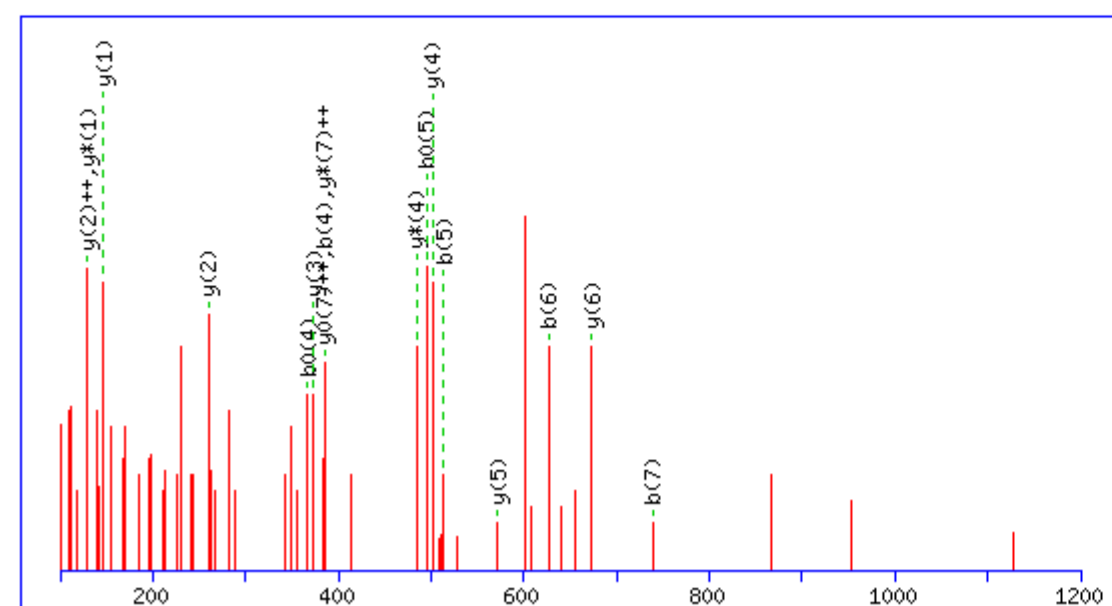

Monoisotopic mass of neutral peptide Mr(calc): 884.496735

Fixed modifications: Propionamide (C) (apply to specified residues or termini only)

Variable modifications:

P6 : Oxidation (P)

P7 : Oxidation (P)

Ions Score: 51 Expect: 4.9e-005

Matches : 17/62 fragment ions using 20 most intense peaks ([help](#))

| # | b          | b <sup>++</sup> | b <sup>*</sup> | b <sup>*++</sup> | b <sup>0</sup> | b <sup>0++</sup> | Seq. | y          | y <sup>++</sup> | y <sup>*</sup> | y <sup>*++</sup> | y <sup>0</sup> | y <sup>0++</sup> | # |
|---|------------|-----------------|----------------|------------------|----------------|------------------|------|------------|-----------------|----------------|------------------|----------------|------------------|---|
| 1 | 100.075690 | 50.541483       |                |                  |                |                  | V    |            |                 |                |                  |                |                  | 8 |
| 2 | 213.159754 | 107.083515      |                |                  |                |                  | I    | 786.435597 | 393.721437      | 769.409048     | 385.208162       | 768.425032     | 384.716154       | 7 |
| 3 | 314.207433 | 157.607354      |                |                  | 296.196868     | 148.602072       | T    | 673.351533 | 337.179405      | 656.324984     | 328.666130       | 655.340968     | 328.174122       | 6 |
| 4 | 385.244547 | 193.125911      |                |                  | 367.233982     | 184.120629       | A    | 572.303854 | 286.655565      | 555.277305     | 278.142291       |                |                  | 5 |
| 5 | 513.303125 | 257.155201      | 496.276576     | 248.641926       | 495.292560     | 248.149918       | Q    | 501.266740 | 251.137008      | 484.240191     | 242.623734       |                |                  | 4 |
| 6 | 626.350804 | 313.679040      | 609.324255     | 305.165766       | 608.340239     | 304.673758       | P    | 373.208162 | 187.107719      | 356.181613     | 178.594445       |                |                  | 3 |
| 7 | 739.398483 | 370.202880      | 722.371934     | 361.689605       | 721.387918     | 361.197597       | P    | 260.160483 | 130.583879      | 243.133934     | 122.070605       |                |                  | 2 |
| 8 |            |                 |                |                  |                |                  | K    | 147.112804 | 74.060040       | 130.086255     | 65.546765        |                |                  | 1 |

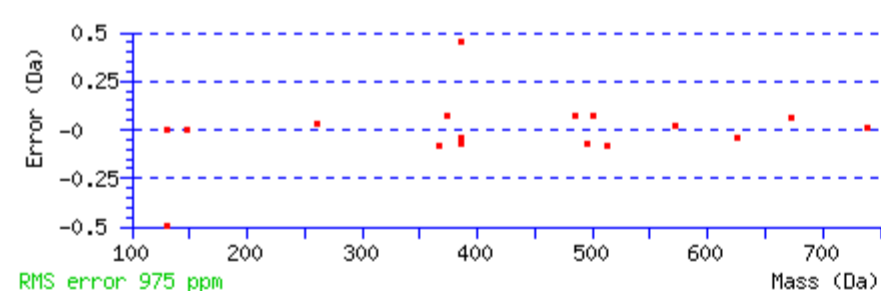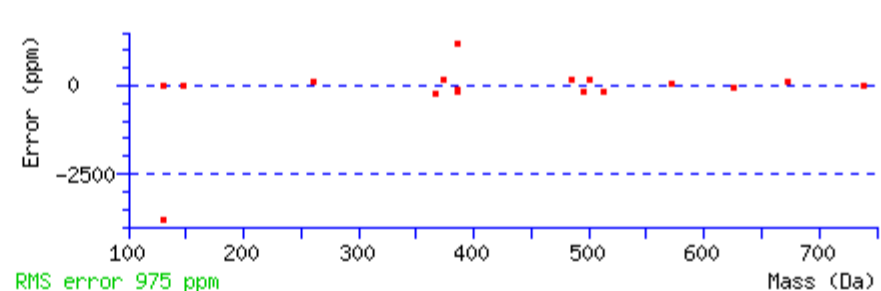

NCBI BLAST search of [VITAQPPK](#)

(Parameters: blastp, nr protein database, expect=20000, no filter, PAM30)

Other BLAST [web gateways](#)

## All matches to this query

| Score | Mr(calc):  | Delta    | Sequence                  |
|-------|------------|----------|---------------------------|
| 50.5  | 884.496735 | 0.001813 | <a href="#">VITAQPPK</a>  |
| 23.7  | 884.496704 | 0.001844 | <a href="#">QSPEALLK</a>  |
| 16.5  | 884.496704 | 0.001844 | <a href="#">EPLKAAPK</a>  |
| 13.4  | 884.496735 | 0.001813 | <a href="#">GAAPVDVLK</a> |
| 13.2  | 884.496719 | 0.001829 | <a href="#">TPADPKLK</a>  |
| 12.8  | 884.496719 | 0.001829 | <a href="#">SAQPLPLK</a>  |
| 12.3  | 884.496719 | 0.001829 | <a href="#">ASPAVALPK</a> |
| 10.3  | 884.490189 | 0.008359 | <a href="#">KPMQLPR</a>   |
| 10.3  | 884.490189 | 0.008359 | <a href="#">KPMQLPR</a>   |
| 10.1  | 884.490189 | 0.008359 | <a href="#">MNKHVLK</a>   |

Mascot: <http://www.matrixscience.com/>

**MATRIX SCIENCE Mascot Search Results**

**Peptide View**

MS/MS Fragmentation of **KPKPKPK**

Found in **CLD23\_HUMAN**, Claudin-23 OS=Homo sapiens GN=CLDN23 PE=1 SV=2

Match to Query 4558: 869.539308 from(435.776930,2+) rtinseconds(1635) index(4252)

Title: Locus:1.1.1.2279.5

Data file 2011-11-13 - TFD - EP 7-8.mgf

Click mouse within plot area to zoom in by factor of two about that point

Or, Plot from  to  Da

Label all possible matches  Label matches used for scoring

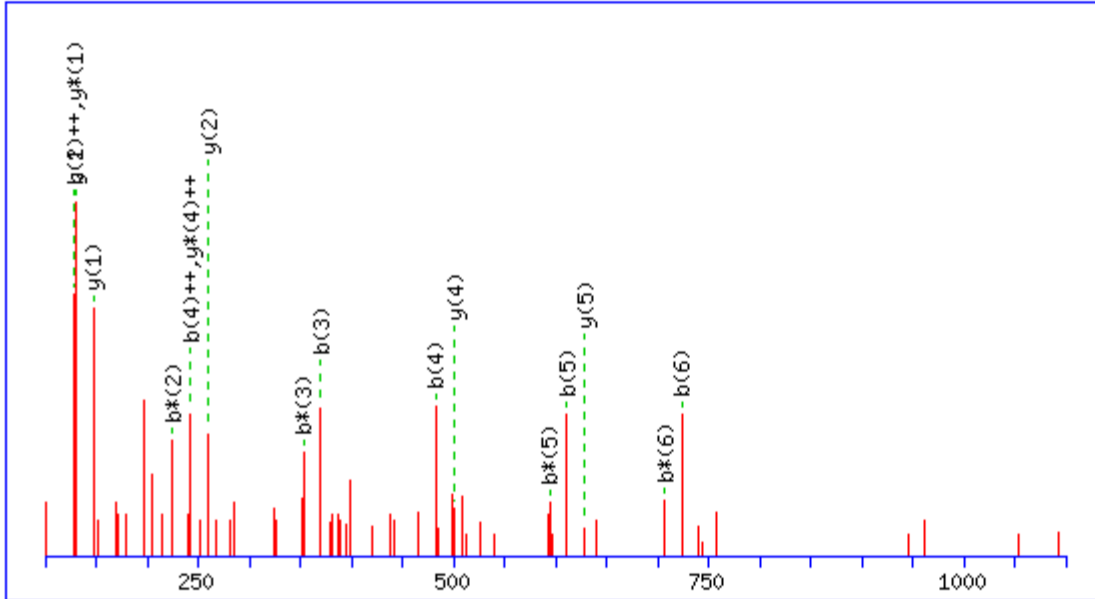

Monoisotopic mass of neutral peptide Mr(calc): 869.533432

Fixed modifications: Propionamide (C) (apply to specified residues or termini only)

Variable modifications:

P2 : Oxidation (P)

P4 : Oxidation (P)

P6 : Oxidation (P)

Ions Score: 49 Expect: 9.2e-005

Matches : 18/48 fragment ions using 21 most intense peaks [\(help\)](#)

| # | b          | b <sup>++</sup> | b <sup>*</sup> | b <sup>*++</sup> | Seq. | y          | y <sup>++</sup> | y <sup>*</sup> | y <sup>*++</sup> | # |
|---|------------|-----------------|----------------|------------------|------|------------|-----------------|----------------|------------------|---|
| 1 | 129.102239 | 65.054757       | 112.075690     | 56.541483        | K    |            |                 |                |                  | 7 |
| 2 | 242.149918 | 121.578597      | 225.123369     | 113.065322       | P    | 742.445767 | 371.726522      | 725.419218     | 363.213247       | 6 |
| 3 | 370.244881 | 185.626079      | 353.218332     | 177.112804       | K    | 629.398088 | 315.202682      | 612.371539     | 306.689408       | 5 |
| 4 | 483.292560 | 242.149918      | 466.266011     | 233.636644       | P    | 501.303125 | 251.155201      | 484.276576     | 242.641926       | 4 |
| 5 | 611.387523 | 306.197400      | 594.360974     | 297.684125       | K    | 388.255446 | 194.631361      | 371.228897     | 186.118087       | 3 |
| 6 | 724.435202 | 362.721239      | 707.408653     | 354.207965       | P    | 260.160483 | 130.583879      | 243.133934     | 122.070605       | 2 |
| 7 |            |                 |                |                  | K    | 147.112804 | 74.060040       | 130.086255     | 65.546765        | 1 |

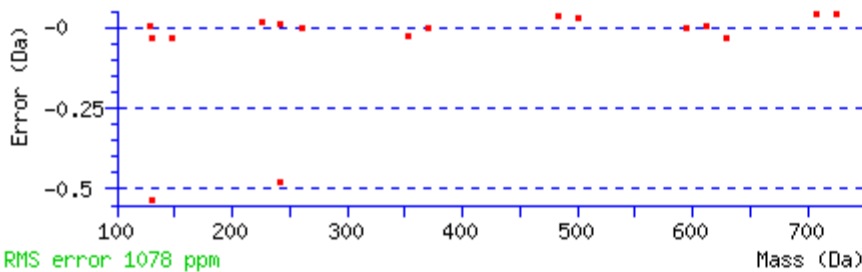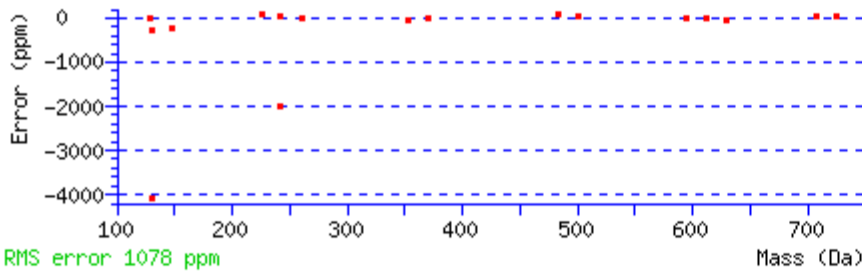

NCBI BLAST search of [KPKPKPK](#)

(Parameters: blastp, nr protein database, expect=20000, no filter, PAM30)

Other BLAST [web gateways](#)

**All matches to this query**

| Score | Mr(calc):  | Delta     | Sequence                 |
|-------|------------|-----------|--------------------------|
| 49.3  | 869.533432 | 0.005876  | <a href="#">KPKPKPK</a>  |
| 49.3  | 869.533432 | 0.005876  | <a href="#">QPQLKLK</a>  |
| 49.1  | 869.533432 | 0.005876  | <a href="#">QLQQLLK</a>  |
| 41.3  | 869.533432 | 0.005876  | <a href="#">LKQIGALQ</a> |
| 34.0  | 869.533432 | 0.005876  | <a href="#">KAAVPQIK</a> |
| 33.7  | 869.533432 | 0.005876  | <a href="#">QQLQLLK</a>  |
| 31.5  | 869.533432 | 0.005876  | <a href="#">KPLKQPK</a>  |
| 31.4  | 869.533432 | 0.005876  | <a href="#">KLQPIQK</a>  |
| 21.4  | 869.544662 | -0.005354 | <a href="#">QRPTKLK</a>  |
| 20.9  | 869.533432 | 0.005876  | <a href="#">QKLLGPSK</a> |



**Peptide View**

MS/MS Fragmentation of **AGIVQEDVQPPGLK**

Found in **CD052\_HUMAN**, Uncharacterized protein C4orf52 OS=Homo sapiens GN=C4orf52 PE=1 SV=2

Match to Query 22670: 1449.794728 from(725.904640,2+) rtinseconds(2301) index(13395)

Title: Locus:1.1.1.2599.32

Data file 2011-11-14 - TFD - EP 8-8.mgf

Click mouse within plot area to zoom in by factor of two about that point

Or, Plot from  to  Da

Label all possible matches  Label matches used for scoring

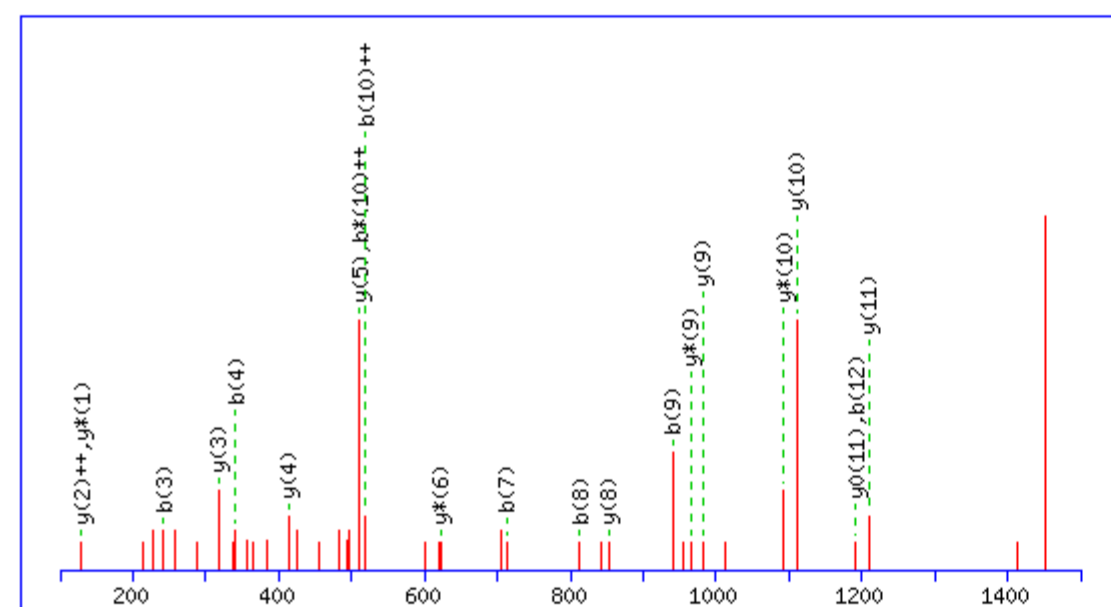

Monoisotopic mass of neutral peptide Mr(calc): 1449.782745

Fixed modifications: Propionamide (C) (apply to specified residues or termini only)

Ions Score: 48 Expect: 0.00011

Matches : 21/124 fragment ions using 32 most intense peaks [\(help\)](#)

| #  | b                  | b <sup>++</sup>   | b <sup>*</sup> | b <sup>*++</sup>  | b <sup>0</sup> | b <sup>0++</sup> | Seq. | y                  | y <sup>++</sup>   | y <sup>*</sup>     | y <sup>*++</sup> | y <sup>0</sup>     | y <sup>0++</sup> | #  |
|----|--------------------|-------------------|----------------|-------------------|----------------|------------------|------|--------------------|-------------------|--------------------|------------------|--------------------|------------------|----|
| 1  | 72.044390          | 36.525833         |                |                   |                |                  | A    |                    |                   |                    |                  |                    |                  | 14 |
| 2  | 129.065854         | 65.036565         |                |                   |                |                  | G    | 1379.752908        | 690.380092        | 1362.726359        | 681.866818       | 1361.742343        | 681.374809       | 13 |
| 3  | <b>242.149918</b>  | 121.578597        |                |                   |                |                  | I    | 1322.731444        | 661.869360        | 1305.704895        | 653.356085       | 1304.720879        | 652.864077       | 12 |
| 4  | <b>341.218332</b>  | 171.112804        |                |                   |                |                  | V    | <b>1209.647380</b> | 605.327328        | 1192.620831        | 596.814054       | <b>1191.636815</b> | 596.322045       | 11 |
| 5  | 469.276910         | 235.142093        | 452.250361     | 226.628819        |                |                  | Q    | <b>1110.578966</b> | 555.793121        | <b>1093.552417</b> | 547.279846       | 1092.568401        | 546.787838       | 10 |
| 6  | 598.319503         | 299.663390        | 581.292954     | 291.150115        | 580.308938     | 290.658107       | E    | <b>982.520388</b>  | 491.763832        | <b>965.493839</b>  | 483.250557       | 964.509823         | 482.758549       | 9  |
| 7  | <b>713.346446</b>  | 357.176861        | 696.319897     | 348.663587        | 695.335881     | 348.171579       | D    | <b>853.477795</b>  | 427.242535        | 836.451246         | 418.729261       | 835.467230         | 418.237253       | 8  |
| 8  | <b>812.414860</b>  | 406.711068        | 795.388311     | 398.197794        | 794.404295     | 397.705786       | V    | 738.450852         | 369.729064        | 721.424303         | 361.215789       |                    |                  | 7  |
| 9  | <b>940.473438</b>  | 470.740357        | 923.446889     | 462.227083        | 922.462873     | 461.735075       | Q    | 639.382438         | 320.194857        | <b>622.355889</b>  | 311.681582       |                    |                  | 6  |
| 10 | 1037.526202        | <b>519.266739</b> | 1020.499653    | <b>510.753465</b> | 1019.515637    | 510.261457       | P    | <b>511.323860</b>  | 256.165568        | 494.297311         | 247.652293       |                    |                  | 5  |
| 11 | 1134.578966        | 567.793121        | 1117.552417    | 559.279847        | 1116.568401    | 558.787839       | P    | <b>414.271096</b>  | 207.639186        | 397.244547         | 199.125911       |                    |                  | 4  |
| 12 | <b>1191.600430</b> | 596.303853        | 1174.573881    | 587.790579        | 1173.589865    | 587.298570       | G    | <b>317.218332</b>  | 159.112804        | 300.191783         | 150.599529       |                    |                  | 3  |
| 13 | 1304.684494        | 652.845885        | 1287.657945    | 644.332610        | 1286.673929    | 643.840602       | L    | 260.196868         | <b>130.602072</b> | 243.170319         | 122.088797       |                    |                  | 2  |
| 14 |                    |                   |                |                   |                |                  | K    | 147.112804         | 74.060040         | <b>130.086255</b>  | 65.546765        |                    |                  | 1  |

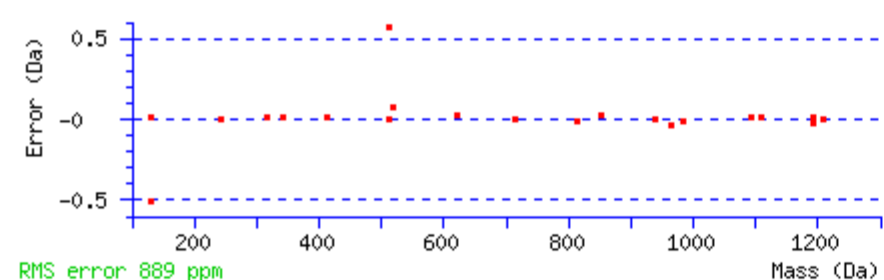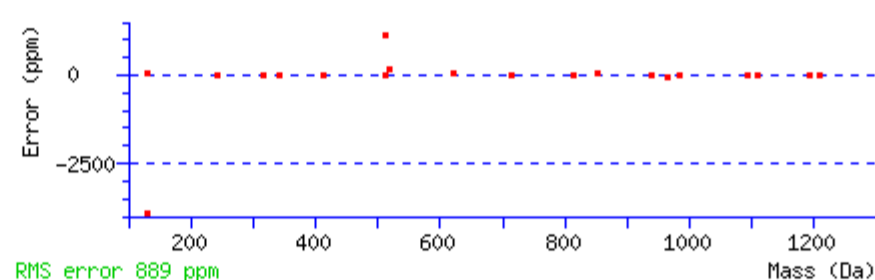

NCBI BLAST search of **AGIVQEDVQPPGLK**

(Parameters: blastp, nr protein database, expect=20000, no filter, PAM30)

Other BLAST [web gateways](#)

**All matches to this query**

| Score | Mr(calc):   | Delta    | Sequence                        |
|-------|-------------|----------|---------------------------------|
| 47.6  | 1449.782745 | 0.011983 | <a href="#">AGIVQEDVQPPGLK</a>  |
| 5.5   | 1449.782715 | 0.012013 | <a href="#">VQIYSIEVRESK</a>    |
| 5.1   | 1449.793976 | 0.000752 | <a href="#">GLPGESGPRGLLGPK</a> |

# MASCOT Search Results

## Peptide View

MS/MS Fragmentation of **ESLIPSVGR**

Found in **CE034\_HUMAN**, Uncharacterized protein C5orf34 OS=Homo sapiens GN=C5orf34 PE=2 SV=2

Match to Query 12226: 972.520828 from(487.267690,2+) rtinseconds(2345) index(29227)

Title: Locus:1.1.1.2315.7

Data file 2011-11-14 - TFD - EP 8-3.mgf

Click mouse within plot area to zoom in by factor of two about that point

Or, Plot from  to  Da

Label all possible matches  Label matches used for scoring

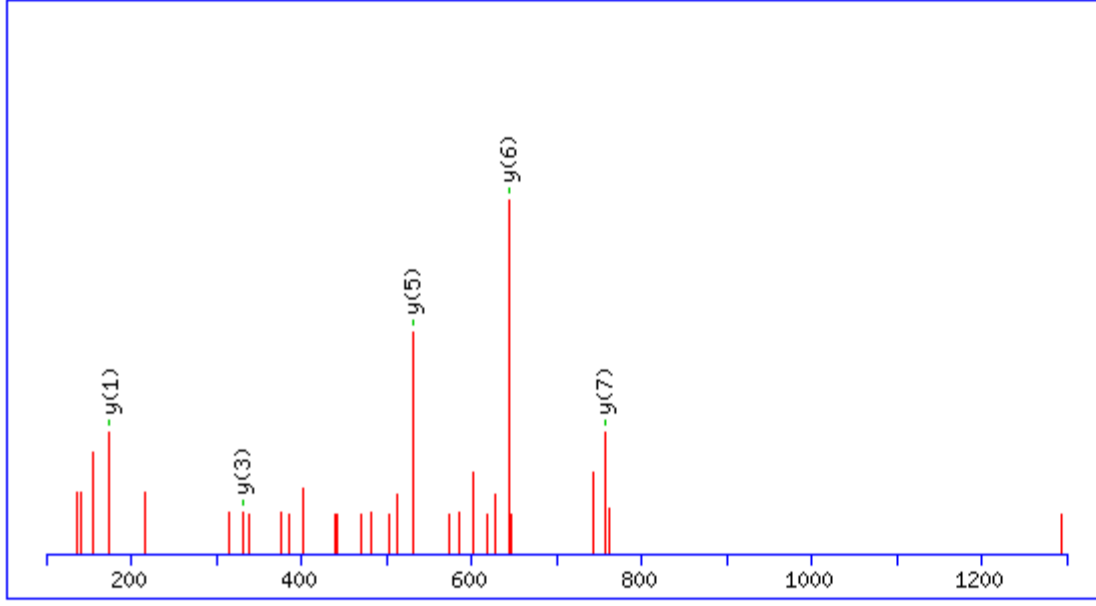

Monoisotopic mass of neutral peptide **Mr(calc): 972.524002**

Fixed modifications: Propionamide (C) (apply to specified residues or termini only)

Variable modifications:

P5 : Oxidation (P)

Ions Score: 41 Expect: 0.0013

Matches : 5/74 fragment ions using 7 most intense peaks ([help](#))

| # | b          | b <sup>++</sup> | b <sup>0</sup> | b <sup>0++</sup> | Seq. | y                 | y <sup>++</sup> | y <sup>*</sup> | y <sup>++</sup> | y <sup>0</sup> | y <sup>0++</sup> | # |
|---|------------|-----------------|----------------|------------------|------|-------------------|-----------------|----------------|-----------------|----------------|------------------|---|
| 1 | 130.049869 | 65.528572       | 112.039304     | 56.523290        | E    |                   |                 |                |                 |                |                  | 9 |
| 2 | 217.081897 | 109.044586      | 199.071332     | 100.039304       | S    | 844.488693        | 422.747985      | 827.462144     | 414.234710      | 826.478128     | 413.742702       | 8 |
| 3 | 330.165961 | 165.586618      | 312.155396     | 156.581336       | L    | <b>757.456665</b> | 379.231971      | 740.430116     | 370.718696      | 739.446100     | 370.226688       | 7 |
| 4 | 443.250025 | 222.128650      | 425.239460     | 213.123368       | I    | <b>644.372601</b> | 322.689939      | 627.346052     | 314.176664      | 626.362036     | 313.684656       | 6 |
| 5 | 556.297704 | 278.652490      | 538.287139     | 269.647208       | P    | <b>531.288537</b> | 266.147907      | 514.261988     | 257.634632      | 513.277972     | 257.142624       | 5 |
| 6 | 643.329732 | 322.168504      | 625.319167     | 313.163222       | S    | 418.240858        | 209.624067      | 401.214309     | 201.110793      | 400.230293     | 200.618785       | 4 |
| 7 | 742.398146 | 371.702711      | 724.387581     | 362.697429       | V    | <b>331.208830</b> | 166.108053      | 314.182281     | 157.594779      |                |                  | 3 |
| 8 | 799.419610 | 400.213443      | 781.409045     | 391.208161       | G    | 232.140416        | 116.573846      | 215.113867     | 108.060572      |                |                  | 2 |
| 9 |            |                 |                |                  | R    | <b>175.118952</b> | 88.063114       | 158.092403     | 79.549840       |                |                  | 1 |

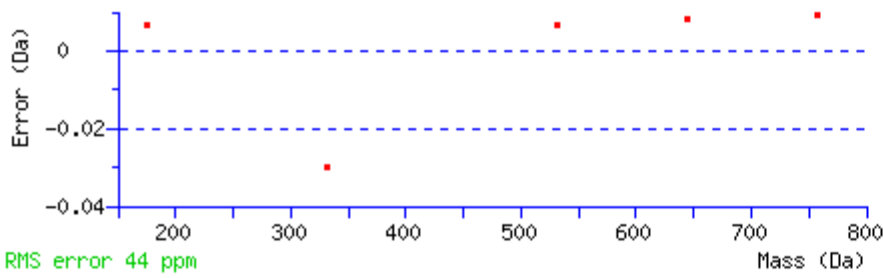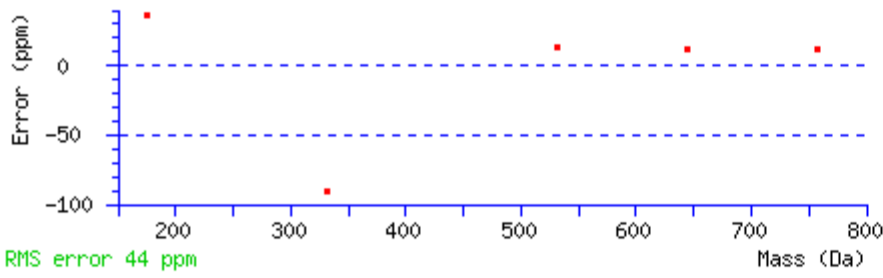

NCBI BLAST search of **ESLIPSVGR**

(Parameters: blastp, nr protein database, expect=20000, no filter, PAM30)

Other BLAST [web gateways](#)

## All matches to this query

| Score | Mr(calc):  | Delta     | Sequence                  |
|-------|------------|-----------|---------------------------|
| 41.0  | 972.523972 | -0.003144 | <a href="#">SEIHELNR</a>  |
| 40.9  | 972.524002 | -0.003174 | <a href="#">ESLIPSVGR</a> |
| 14.3  | 972.523987 | -0.003159 | <a href="#">EIISEVQR</a>  |
| 14.3  | 972.523972 | -0.003144 | <a href="#">IEISELNR</a>  |
| 13.3  | 972.523987 | -0.003159 | <a href="#">ELSLVEQR</a>  |
| 12.2  | 972.524002 | -0.003174 | <a href="#">DLTELVQR</a>  |
| 10.3  | 972.517487 | 0.003341  | <a href="#">VVPPSMRR</a>  |
| 7.4   | 972.523987 | -0.003159 | <a href="#">LTLDINER</a>  |
| 7.3   | 972.517487 | 0.003341  | <a href="#">VVPPSMRR</a>  |
| 5.8   | 972.524002 | -0.003174 | <a href="#">LVTEGALDR</a> |

# MASCOT Search Results

## Peptide View

MS/MS Fragmentation of **VPPQKPR**

Found in **CG051\_HUMAN**, Uncharacterized protein C7orf51 OS=Homo sapiens GN=C7orf51 PE=1 SV=1

Match to Query 4833: 852.485668 from(427.250110,2+) rtinseconds(1882) index(17518)

Title: Locus:1.1.1.1984.6

Data file 2011-11-10 - TFD - EP 3-6.mgf

Click mouse within plot area to zoom in by factor of two about that point

Or, Plot from  to  Da

Label all possible matches  Label matches used for scoring

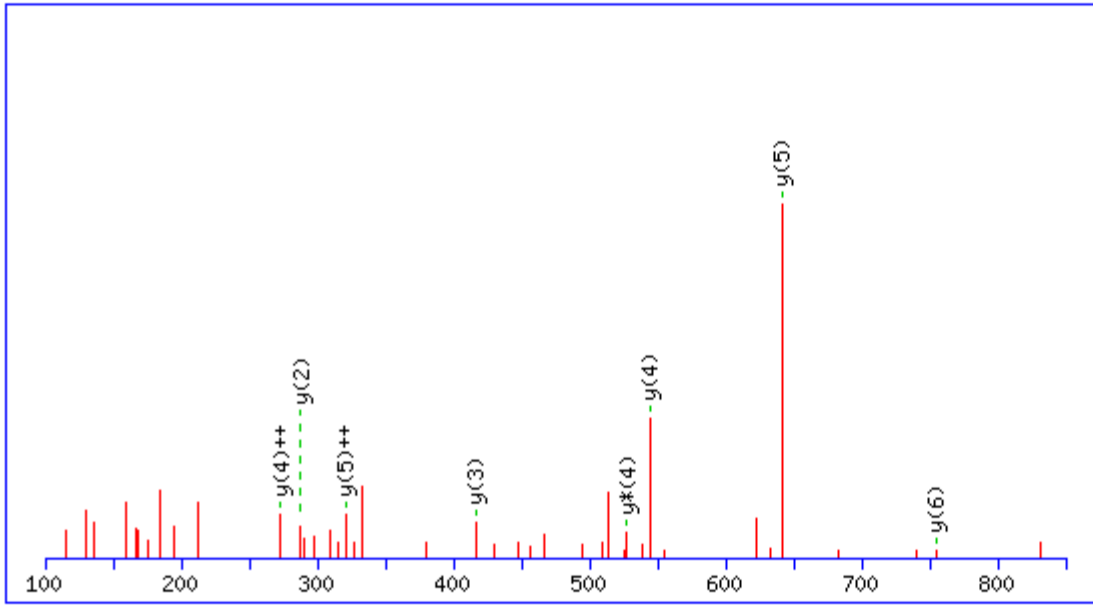

Monoisotopic mass of neutral peptide Mr(calc): 852.481750

Fixed modifications: Propionamide (C) (apply to specified residues or termini only)

Variable modifications:

P2 : Oxidation (P)

P6 : Oxidation (P)

Ions Score: 32 Expect: 0.0029

Matches : 8/42 fragment ions using 15 most intense peaks [\(help\)](#)

| # | b          | b <sup>++</sup> | b <sup>*</sup> | b <sup>*++</sup> | Seq. | y          | y <sup>++</sup> | y <sup>*</sup> | y <sup>*++</sup> | # |
|---|------------|-----------------|----------------|------------------|------|------------|-----------------|----------------|------------------|---|
| 1 | 100.075690 | 50.541483       |                |                  | V    |            |                 |                |                  | 7 |
| 2 | 213.123369 | 107.065322      |                |                  | P    | 754.420615 | 377.713946      | 737.394066     | 369.200671       | 6 |
| 3 | 310.176133 | 155.591704      |                |                  | P    | 641.372936 | 321.190106      | 624.346387     | 312.676832       | 5 |
| 4 | 438.234711 | 219.620994      | 421.208162     | 211.107719       | Q    | 544.320172 | 272.663724      | 527.293623     | 264.150450       | 4 |
| 5 | 566.329674 | 283.668475      | 549.303125     | 275.155201       | K    | 416.261594 | 208.634435      | 399.235045     | 200.121160       | 3 |
| 6 | 679.377353 | 340.192315      | 662.350804     | 331.679040       | P    | 288.166631 | 144.586953      | 271.140082     | 136.073679       | 2 |
| 7 |            |                 |                |                  | R    | 175.118952 | 88.063114       | 158.092403     | 79.549839        | 1 |

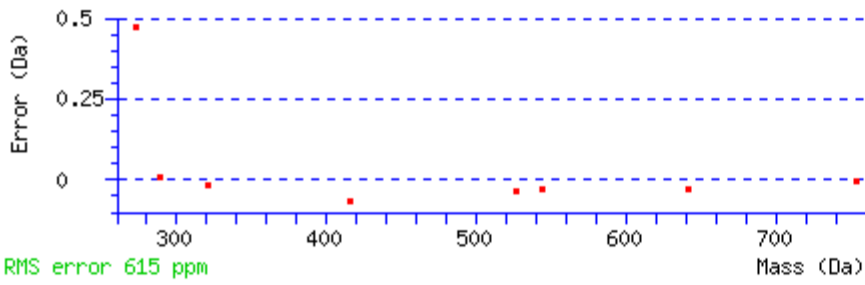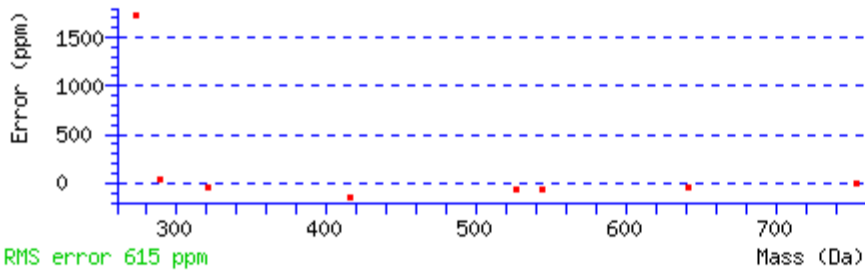

NCBI BLAST search of [VPPQKPR](#)

(Parameters: blastp, nr protein database, expect=20000, no filter, PAM30)

Other BLAST [web gateways](#)

## All matches to this query

| Score | Mr(calc):  | Delta     | Sequence                 |
|-------|------------|-----------|--------------------------|
| 32.3  | 852.481750 | 0.003918  | <a href="#">VPPQKPR</a>  |
| 23.0  | 852.485764 | -0.000096 | <a href="#">VLPPNWK</a>  |
| 15.5  | 852.481750 | 0.003918  | <a href="#">VPPQKPR</a>  |
| 12.4  | 852.481750 | 0.003918  | <a href="#">LVPPAQGR</a> |
| 7.0   | 852.481750 | 0.003918  | <a href="#">LVTDHLR</a>  |
| 3.9   | 852.481750 | 0.003918  | <a href="#">VIDTLHR</a>  |

# Mascot Search Results

## Peptide View

MS/MS Fragmentation of **YLAQNYDIPNLAK**

Found in **CG073\_HUMAN**, Uncharacterized protein C7orf73 OS=Homo sapiens GN=C7orf73 PE=4 SV=1

Match to Query 855823: 1521.778708 from(761.896630,2+) rtinseconds(2768) index(1005738)

Title: Locus:1.1.1.1548.44

Data file C:\Program Files (x86)\Matrix Science\Mascot Daemon\mgf\3 TFD - Epitel - R2\mascot\_daemon\_merge.mgf

Click mouse within plot area to zoom in by factor of two about that point

Or, Plot from  to  Da

Label all possible matches  Label matches used for scoring

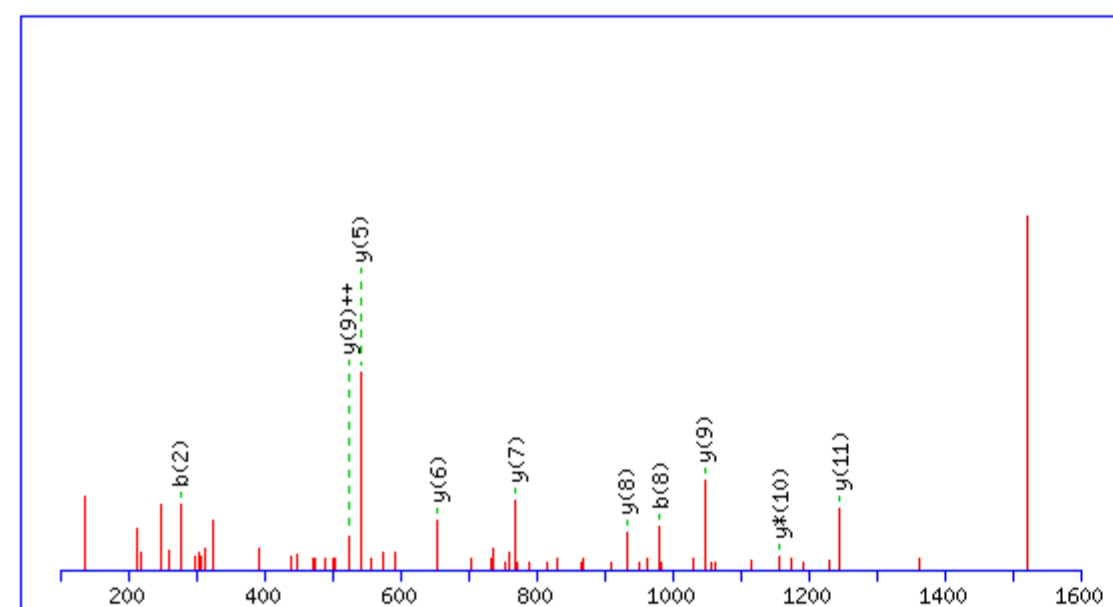

Monoisotopic mass of neutral peptide Mr(calc): 1521.782700

Fixed modifications: Carbamidomethyl (C) (apply to specified residues or termini only)

Ions Score: 42 Expect: 0.00071

Matches : 10/114 fragment ions using 13 most intense peaks ([help](#))

| #  | b                 | b <sup>++</sup> | b <sup>*</sup> | b <sup>*++</sup> | b <sup>0</sup> | b <sup>0++</sup> | Seq. | y                  | y <sup>++</sup>   | y <sup>*</sup>     | y <sup>*++</sup> | y <sup>0</sup> | y <sup>0++</sup> | #  |
|----|-------------------|-----------------|----------------|------------------|----------------|------------------|------|--------------------|-------------------|--------------------|------------------|----------------|------------------|----|
| 1  | 164.070605        | 82.538940       |                |                  |                |                  | Y    |                    |                   |                    |                  |                |                  | 13 |
| 2  | <b>277.154669</b> | 139.080973      |                |                  |                |                  | L    | 1359.726692        | 680.366984        | 1342.700143        | 671.853710       | 1341.716127    | 671.361701       | 12 |
| 3  | 348.191783        | 174.599530      |                |                  |                |                  | A    | <b>1246.642628</b> | 623.824952        | 1229.616079        | 615.311678       | 1228.632063    | 614.819670       | 11 |
| 4  | 476.250361        | 238.628819      | 459.223812     | 230.115544       |                |                  | Q    | 1175.605514        | 588.306395        | <b>1158.578965</b> | 579.793121       | 1157.594949    | 579.301113       | 10 |
| 5  | 590.293288        | 295.650282      | 573.266739     | 287.137008       |                |                  | N    | <b>1047.546936</b> | <b>524.277106</b> | 1030.520387        | 515.763832       | 1029.536371    | 515.271823       | 9  |
| 6  | 753.356617        | 377.181947      | 736.330068     | 368.668672       |                |                  | Y    | <b>933.504009</b>  | 467.255643        | 916.477460         | 458.742368       | 915.493444     | 458.250360       | 8  |
| 7  | 868.383560        | 434.695418      | 851.357011     | 426.182144       | 850.372995     | 425.690136       | D    | <b>770.440680</b>  | 385.723978        | 753.414131         | 377.210703       | 752.430115     | 376.718695       | 7  |
| 8  | <b>981.467624</b> | 491.237450      | 964.441075     | 482.724176       | 963.457059     | 482.232168       | I    | <b>655.413737</b>  | 328.210507        | 638.387188         | 319.697232       |                |                  | 6  |
| 9  | 1078.520388       | 539.763832      | 1061.493839    | 531.250558       | 1060.509823    | 530.758550       | P    | <b>542.329673</b>  | 271.668475        | 525.303124         | 263.155200       |                |                  | 5  |
| 10 | 1192.563315       | 596.785296      | 1175.536766    | 588.272021       | 1174.552750    | 587.780013       | N    | 445.276909         | 223.142092        | 428.250360         | 214.628818       |                |                  | 4  |
| 11 | 1305.647379       | 653.327328      | 1288.620830    | 644.814053       | 1287.636814    | 644.322045       | L    | 331.233982         | 166.120629        | 314.207433         | 157.607354       |                |                  | 3  |
| 12 | 1376.684493       | 688.845885      | 1359.657944    | 680.332610       | 1358.673928    | 679.840602       | A    | 218.149918         | 109.578597        | 201.123369         | 101.065322       |                |                  | 2  |
| 13 |                   |                 |                |                  |                |                  | K    | 147.112804         | 74.060040         | 130.086255         | 65.546765        |                |                  | 1  |

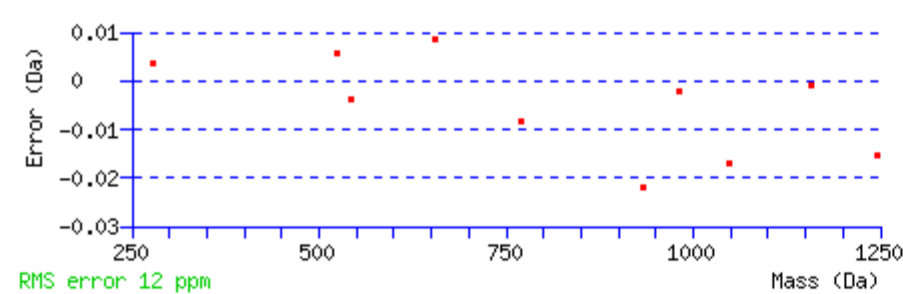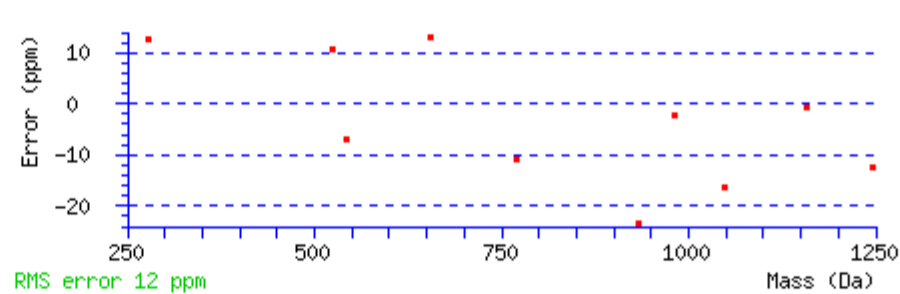

NCBI BLAST search of **YLAQNYDIPNLAK**

(Parameters: blastp, nr protein database, expect=20000, no filter, PAM30)

Other BLAST [web gateways](#)

All matches to this query

| Score | Mr(calc):   | Delta     | Sequence                      |
|-------|-------------|-----------|-------------------------------|
| 42.2  | 1521.782700 | -0.003992 | <a href="#">YLAQNYDIPNLAK</a> |

Mascot: <http://www.matrixscience.com/>

# MASCOT SCIENCE Mascot Search Results

## Peptide View

MS/MS Fragmentation of **ASLTGTPSR**

Found in **YM012\_HUMAN**, Uncharacterized protein DKFZp434B061 OS=Homo sapiens PE=2 SV=2

Match to Query 113964: 888.464048 from(445.239300,2+) rtinseconds(1452) index(501735)

Title: Locus:1.1.1.881.6

Data file C:\Program Files (x86)\Matrix Science\Mascot Daemon\mgf3 TFD - Epitel - R2\mascot\_daemon\_merge.mgf

Click mouse within plot area to zoom in by factor of two about that point

Or, Plot from  to  Da

Label all possible matches  Label matches used for scoring

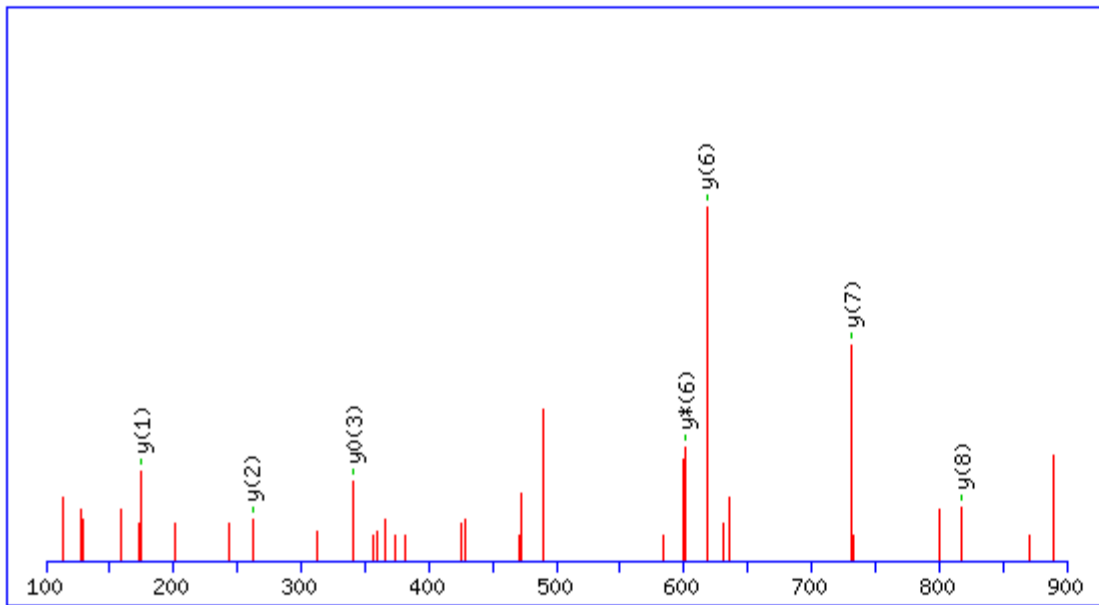

Monoisotopic mass of neutral peptide  $M_r(\text{calc})$ : 888.466492

Fixed modifications: Carbamidomethyl (C) (apply to specified residues or termini only)

Ions Score: 46 Expect: 0.00064

Matches : 7/76 fragment ions using 8 most intense peaks [\(help\)](#)

| # | b          | b <sup>++</sup> | b <sup>0</sup> | b <sup>0++</sup> | Seq. | y          | y <sup>++</sup> | y <sup>*</sup> | y <sup>+++</sup> | y <sup>0</sup> | y <sup>0++</sup> | # |
|---|------------|-----------------|----------------|------------------|------|------------|-----------------|----------------|------------------|----------------|------------------|---|
| 1 | 72.044390  | 36.525833       |                |                  | A    |            |                 |                |                  |                |                  | 9 |
| 2 | 159.076418 | 80.041847       | 141.065853     | 71.036564        | S    | 818.436658 | 409.721967      | 801.410109     | 401.208693       | 800.426093     | 400.716685       | 8 |
| 3 | 272.160482 | 136.583879      | 254.149917     | 127.578597       | L    | 731.404630 | 366.205953      | 714.378081     | 357.692679       | 713.394065     | 357.200671       | 7 |
| 4 | 373.208161 | 187.107719      | 355.197596     | 178.102436       | T    | 618.320566 | 309.663921      | 601.294017     | 301.150647       | 600.310001     | 300.658639       | 6 |
| 5 | 430.229625 | 215.618450      | 412.219060     | 206.613168       | G    | 517.272887 | 259.140082      | 500.246338     | 250.626807       | 499.262322     | 250.134799       | 5 |
| 6 | 531.277304 | 266.142290      | 513.266739     | 257.137008       | T    | 460.251423 | 230.629349      | 443.224874     | 222.116075       | 442.240858     | 221.624067       | 4 |
| 7 | 628.330068 | 314.668672      | 610.319503     | 305.663390       | P    | 359.203744 | 180.105510      | 342.177195     | 171.592235       | 341.193179     | 171.100227       | 3 |
| 8 | 715.362096 | 358.184686      | 697.351531     | 349.179404       | S    | 262.150980 | 131.579128      | 245.124431     | 123.065853       | 244.140415     | 122.573845       | 2 |
| 9 |            |                 |                |                  | R    | 175.118952 | 88.063114       | 158.092403     | 79.549839        |                |                  | 1 |

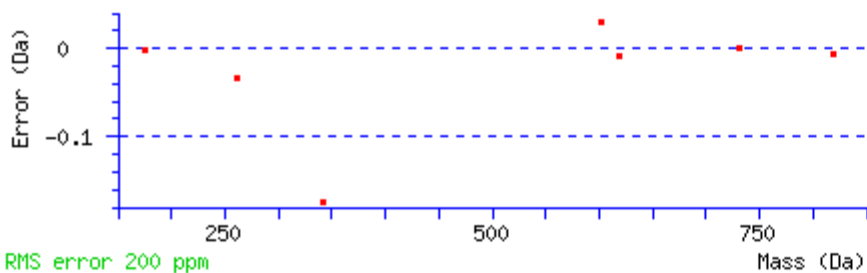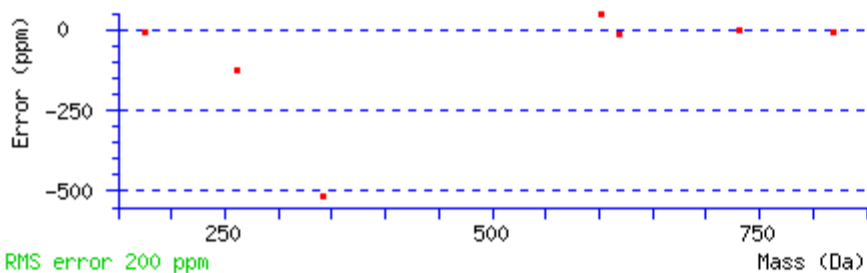

NCBI BLAST search of **ASLTGTPSR**

(Parameters: blastp, nr protein database, expect=20000, no filter, PAM30)

Other BLAST [web gateways](#)

All matches to this query

| Score | $M_r(\text{calc})$ : | Delta     | Sequence                  |
|-------|----------------------|-----------|---------------------------|
| 45.8  | 888.466492           | -0.002444 | <a href="#">ASLTGTPSR</a> |
| 41.8  | 888.466461           | -0.002413 | <a href="#">ASLENSLR</a>  |
| 26.5  | 888.466476           | -0.002428 | <a href="#">ASLLQSDR</a>  |
| 14.0  | 888.455246           | 0.008802  | <a href="#">SALQVEDK</a>  |
| 13.3  | 888.466492           | -0.002444 | <a href="#">APSTAVTAR</a> |
| 10.2  | 888.466476           | -0.002428 | <a href="#">ATSSAALPR</a> |
| 8.7   | 888.456589           | 0.007459  | <a href="#">ASVDRWR</a>   |
| 8.5   | 888.466461           | -0.002413 | <a href="#">SANELLSR</a>  |
| 8.5   | 888.466492           | -0.002444 | <a href="#">SATPATVSR</a> |
| 7.8   | 888.466476           | -0.002428 | <a href="#">ATEVKGER</a>  |

# **MASCOT** Mascot Search Results

## Peptide View

MS/MS Fragmentation of **RPPPPPR**

Found in **K1522\_HUMAN**, Uncharacterized protein KIAA1522 OS=Homo sapiens GN=KIAA1522 PE=1 SV=2

Match to Query 4106: 847.469248 from(424.741900,2+) rtinseconds(743) index(347)

Title: Locus:1.1.1.1626.6

Data file 2011-11-10 - TFD - EP 3-4.mgf

Click mouse within plot area to zoom in by factor of two about that point

Or, Plot from  to  Da

Label all possible matches  Label matches used for scoring

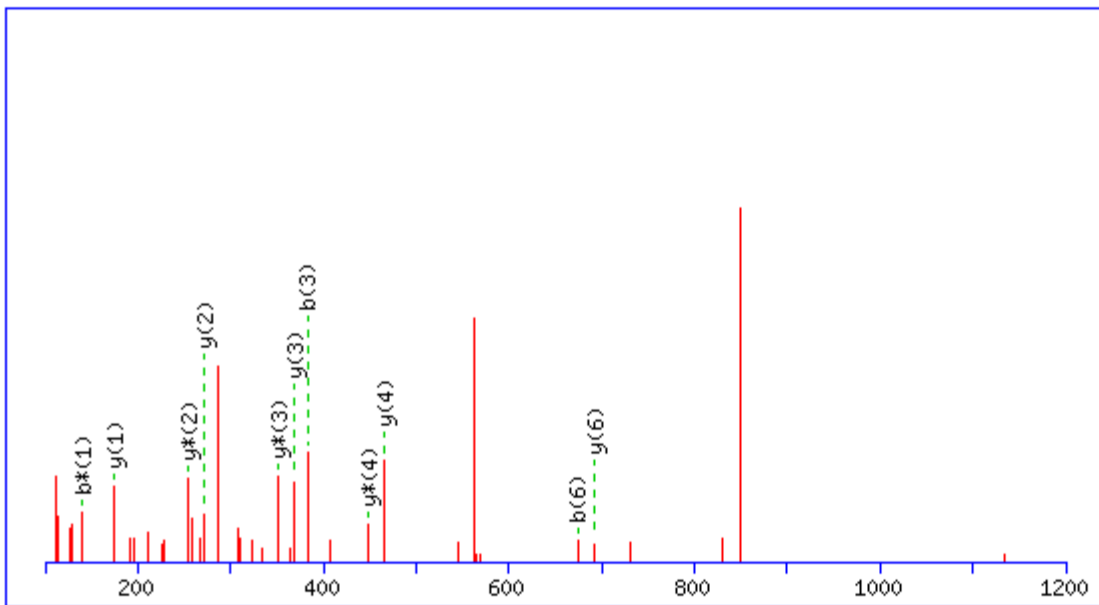

Monoisotopic mass of neutral peptide Mr(calc): 847.466431

Fixed modifications: Propionamide (C) (apply to specified residues or termini only)

Variable modifications:

P2 : Oxidation (P)

P3 : Oxidation (P)

Ions Score: 36 Expect: 0.0021

Matches : 11/48 fragment ions using 18 most intense peaks [\(help\)](#)

| # | b          | b <sup>++</sup> | b <sup>*</sup> | b <sup>*++</sup> | Seq. | y          | y <sup>++</sup> | y <sup>*</sup> | y <sup>*++</sup> | # |
|---|------------|-----------------|----------------|------------------|------|------------|-----------------|----------------|------------------|---|
| 1 | 157.108387 | 79.057831       | 140.081838     | 70.544557        | R    |            |                 |                |                  | 7 |
| 2 | 270.156066 | 135.581671      | 253.129517     | 127.068397       | P    | 692.372602 | 346.689939      | 675.346053     | 338.176665       | 6 |
| 3 | 383.203745 | 192.105510      | 366.177196     | 183.592236       | P    | 579.324923 | 290.166100      | 562.298374     | 281.652825       | 5 |
| 4 | 480.256509 | 240.631892      | 463.229960     | 232.118618       | P    | 466.277244 | 233.642260      | 449.250695     | 225.128986       | 4 |
| 5 | 577.309273 | 289.158275      | 560.282724     | 280.645000       | P    | 369.224480 | 185.115878      | 352.197931     | 176.602603       | 3 |
| 6 | 674.362037 | 337.684657      | 657.335488     | 329.171382       | P    | 272.171716 | 136.589496      | 255.145167     | 128.076221       | 2 |
| 7 |            |                 |                |                  | R    | 175.118952 | 88.063114       | 158.092403     | 79.549839        | 1 |

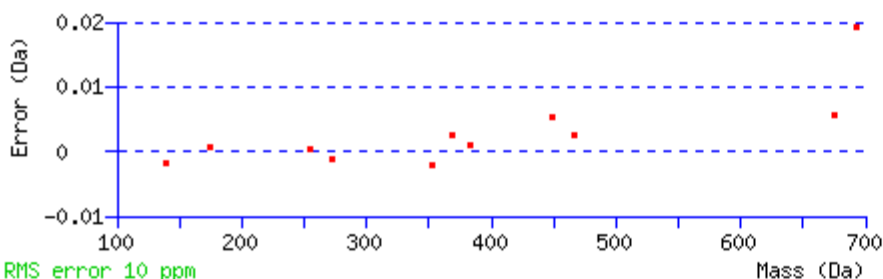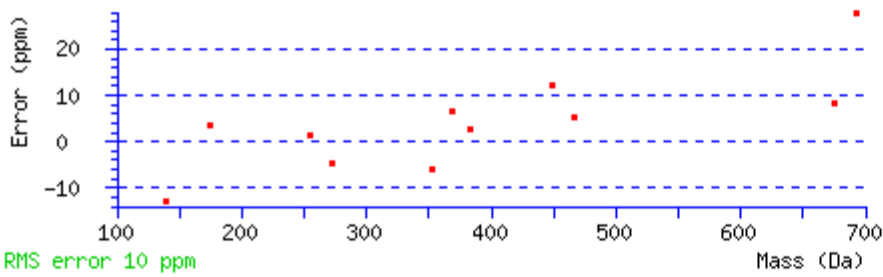

NCBI BLAST search of [RPPPPPR](#)

(Parameters: blastp, nr protein database, expect=20000, no filter, PAM30)

Other BLAST [web gateways](#)

## All matches to this query

| Score | Mr(calc):  | Delta     | Sequence                |
|-------|------------|-----------|-------------------------|
| 35.5  | 847.466431 | 0.002817  | <a href="#">RPPPPPR</a> |
| 16.0  | 847.466415 | 0.002833  | <a href="#">REFIQR</a>  |
| 14.3  | 847.466415 | 0.002833  | <a href="#">RELQFR</a>  |
| 13.3  | 847.466431 | 0.002817  | <a href="#">RPPPPPR</a> |
| 13.3  | 847.466431 | 0.002817  | <a href="#">RPPPPPR</a> |
| 10.5  | 847.466415 | 0.002833  | <a href="#">ERIGAFR</a> |
| 9.3   | 847.466400 | 0.002848  | <a href="#">ERKPYR</a>  |
| 6.5   | 847.477646 | -0.008398 | <a href="#">RTYRPR</a>  |
| 6.0   | 847.466431 | 0.002817  | <a href="#">KVGNFQR</a> |
| 4.8   | 847.466415 | 0.002833  | <a href="#">RFEIQR</a>  |

# Mascot Search Results

## Peptide View

MS/MS Fragmentation of **EGTEAAAAPAGGSPQGP**K

Found in **K1614\_HUMAN**, Uncharacterized protein KIAA1614 OS=Homo sapiens GN=KIAA1614 PE=2 SV=3

Match to Query 41971: 1754.844162 from(585.955330,3+) rtinseconds(2554) index(26107)

Title: Locus:1.1.1.2302.26

Data file 2011-11-12 - TFD - EP 5-7.mgf

Click mouse within plot area to zoom in by factor of two about that point

Or, Plot from  to  Da

Label all possible matches  Label matches used for scoring

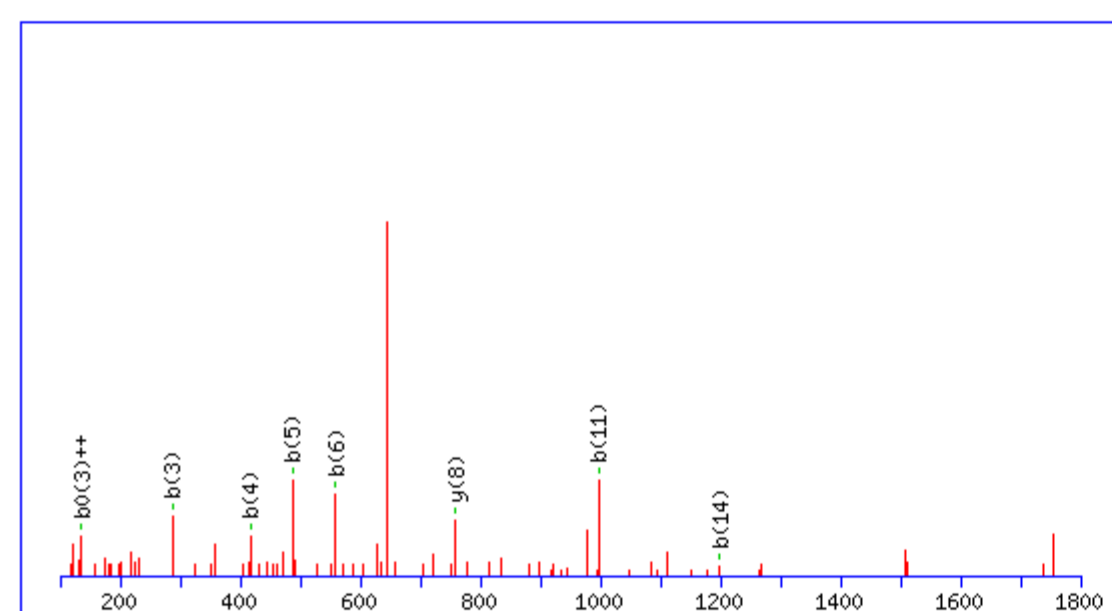

Monoisotopic mass of neutral peptide Mr(calc): 1754.843491

Fixed modifications: Propionamide (C) (apply to specified residues or termini only)

Variable modifications:

P15 : Oxidation (P)

P18 : Oxidation (P)

Ions Score: 31 Expect: 0.0082

Matches : 8/190 fragment ions using 14 most intense peaks [\(help\)](#)

| #  | b                  | b <sup>++</sup> | b <sup>*</sup> | b <sup>*++</sup> | b <sup>0</sup> | b <sup>0++</sup>  | Seq. | y                 | y <sup>++</sup> | y <sup>*</sup> | y <sup>*++</sup> | y <sup>0</sup> | y <sup>0++</sup> | #  |
|----|--------------------|-----------------|----------------|------------------|----------------|-------------------|------|-------------------|-----------------|----------------|------------------|----------------|------------------|----|
| 1  | 130.049869         | 65.528572       |                |                  | 112.039304     | 56.523290         | E    |                   |                 |                |                  |                |                  | 19 |
| 2  | 187.071333         | 94.039305       |                |                  | 169.060768     | 85.034022         | G    | 1626.808193       | 813.907735      | 1609.781644    | 805.394460       | 1608.797628    | 804.902452       | 18 |
| 3  | <b>288.119012</b>  | 144.563144      |                |                  | 270.108447     | <b>135.557862</b> | T    | 1569.786729       | 785.397002      | 1552.760180    | 776.883728       | 1551.776164    | 776.391720       | 17 |
| 4  | <b>417.161605</b>  | 209.084441      |                |                  | 399.151040     | 200.079158        | E    | 1468.739050       | 734.873163      | 1451.712501    | 726.359889       | 1450.728485    | 725.867880       | 16 |
| 5  | <b>488.198719</b>  | 244.602998      |                |                  | 470.188154     | 235.597715        | A    | 1339.696457       | 670.351867      | 1322.669908    | 661.838592       | 1321.685892    | 661.346584       | 15 |
| 6  | <b>559.235833</b>  | 280.121555      |                |                  | 541.225268     | 271.116272        | A    | 1268.659343       | 634.833310      | 1251.632794    | 626.320035       | 1250.648778    | 625.828027       | 14 |
| 7  | 630.272947         | 315.640112      |                |                  | 612.262382     | 306.634829        | A    | 1197.622229       | 599.314752      | 1180.595680    | 590.801478       | 1179.611664    | 590.309470       | 13 |
| 8  | 701.310061         | 351.158669      |                |                  | 683.299496     | 342.153386        | A    | 1126.585115       | 563.796196      | 1109.558566    | 555.282921       | 1108.574550    | 554.790913       | 12 |
| 9  | 829.405024         | 415.206150      | 812.378475     | 406.692876       | 811.394459     | 406.200868        | K    | 1055.548001       | 528.277638      | 1038.521452    | 519.764364       | 1037.537436    | 519.272356       | 11 |
| 10 | 926.457788         | 463.732532      | 909.431239     | 455.219258       | 908.447223     | 454.727250        | P    | 927.453038        | 464.230157      | 910.426489     | 455.716883       | 909.442473     | 455.224875       | 10 |
| 11 | <b>997.494902</b>  | 499.251089      | 980.468353     | 490.737815       | 979.484337     | 490.245807        | A    | 830.400274        | 415.703775      | 813.373725     | 407.190500       | 812.389709     | 406.698492       | 9  |
| 12 | 1054.516366        | 527.761821      | 1037.489817    | 519.248547       | 1036.505801    | 518.756539        | G    | <b>759.363160</b> | 380.185218      | 742.336611     | 371.671944       | 741.352595     | 371.179936       | 8  |
| 13 | 1111.537830        | 556.272553      | 1094.511281    | 547.759279       | 1093.527265    | 547.267271        | G    | 702.341696        | 351.674486      | 685.315147     | 343.161211       | 684.331131     | 342.669203       | 7  |
| 14 | <b>1198.569858</b> | 599.788567      | 1181.543309    | 591.275293       | 1180.559293    | 590.783285        | S    | 645.320232        | 323.163754      | 628.293683     | 314.650480       | 627.309667     | 314.158472       | 6  |
| 15 | 1311.617537        | 656.312407      | 1294.590988    | 647.799132       | 1293.606972    | 647.307124        | P    | 558.288204        | 279.647740      | 541.261655     | 271.134465       |                |                  | 5  |
| 16 | 1439.676115        | 720.341696      | 1422.649566    | 711.828421       | 1421.665550    | 711.336413        | Q    | 445.240525        | 223.123900      | 428.213976     | 214.610626       |                |                  | 4  |
| 17 | 1496.697579        | 748.852427      | 1479.671030    | 740.339153       | 1478.687014    | 739.847145        | G    | 317.181947        | 159.094611      | 300.155398     | 150.581337       |                |                  | 3  |
| 18 | 1609.745258        | 805.376267      | 1592.718709    | 796.862993       | 1591.734693    | 796.370984        | P    | 260.160483        | 130.583879      | 243.133934     | 122.070605       |                |                  | 2  |
| 19 |                    |                 |                |                  |                |                   | K    | 147.112804        | 74.060040       | 130.086255     | 65.546765        |                |                  | 1  |

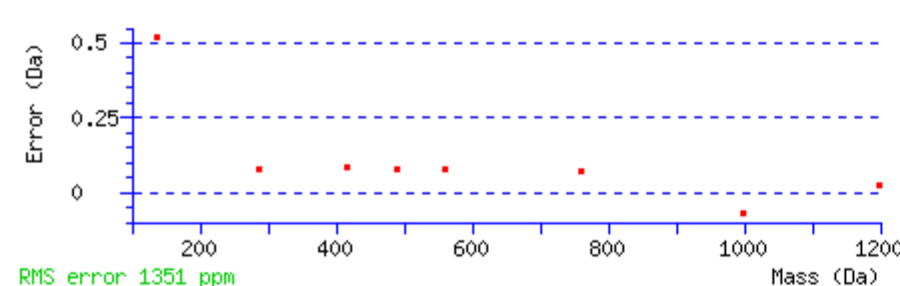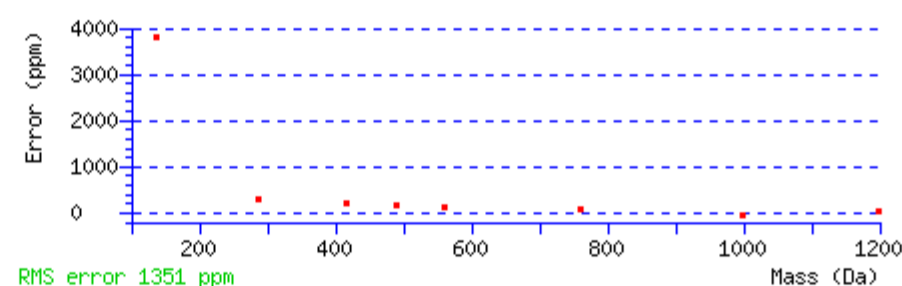

NCBI BLAST search of **EGTEAAAAPAGGSPQGP**K

(Parameters: blastp, nr protein database, expect=20000, no filter, PAM30)

Other BLAST [web gateways](#)

## All matches to this query

| Score | Mr(calc):   | Delta     | Sequence                            |
|-------|-------------|-----------|-------------------------------------|
| 31.3  | 1754.843491 | 0.000671  | <a href="#">EGTEAAAAPAGGSPQGP</a> K |
| 12.7  | 1754.843491 | 0.000671  | <a href="#">EGTEAAAAPAGGSPQGP</a> K |
| 12.7  | 1754.843491 | 0.000671  | <a href="#">EGTEAAAAPAGGSPQGP</a> K |
| 9.7   | 1754.850906 | -0.006744 | <a href="#">ALSGGGSVASPPSPAMP</a> K |
| 9.7   | 1754.850906 | -0.006744 | <a href="#">ALSGGGSVASPPSPAMP</a> K |
| 9.7   | 1754.850906 | -0.006744 | <a href="#">ALSGGGSVASPPSPAMP</a> K |
| 9.7   | 1754.850906 | -0.006744 | <a href="#">ALSGGGSVASPPSPAMP</a> K |
| 9.7   | 1754.850906 | -0.006744 | <a href="#">ALSGGGSVASPPSPAMP</a> K |
| 9.7   | 1754.850906 | -0.006744 | <a href="#">ALSGGGSVASPPSPAMP</a> K |
| 9.7   | 1754.850906 | -0.006744 | <a href="#">ALSGGGSVASPPSPAMP</a> K |
| 2.0   | 1754.847488 | -0.003326 | <a href="#">SDEEYRELFDLAL</a> R     |

# MASCOT SEARCH RESULTS

## Peptide View

MS/MS Fragmentation of **LDPEPEKAAESPSPR**

Found in **K1671\_HUMAN**, Uncharacterized protein KIAA1671 OS=Homo sapiens GN=KIAA1671 PE=1 SV=2

Match to Query 397543: 1653.779442 from(552.267090,3+) rtinseconds(1322) index(417171)

Title: Locus:1.1.1.841.29

Data file C:\Program Files (x86)\Matrix Science\Mascot Daemon\mgf3 TFD - Epitel - R2\mascot\_daemon\_merge.mgf

Click mouse within plot area to zoom in by factor of two about that point

Or, Plot from  to  Da

Label all possible matches  Label matches used for scoring

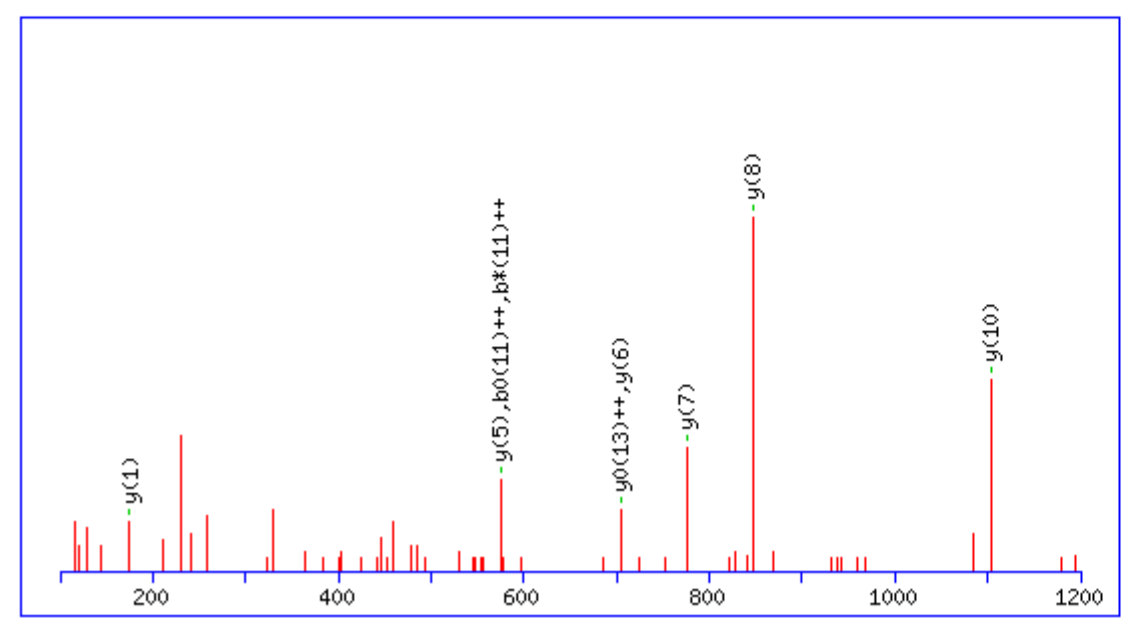

Monoisotopic mass of neutral peptide Mr(calc): 1653.784561

Fixed modifications: Carbamidomethyl (C) (apply to specified residues or termini only)

Variable modifications:

P12 : Oxidation (P)

P14 : Oxidation (P)

Ions Score: 37 Expect: 0.0079

Matches : 9/150 fragment ions using 11 most intense peaks ([help](#))

| #  | b           | b <sup>++</sup> | b <sup>*</sup> | b <sup>*++</sup>  | b <sup>0</sup> | b <sup>0++</sup>  | Seq. | y                  | y <sup>++</sup> | y <sup>*</sup> | y <sup>*++</sup> | y <sup>0</sup> | y <sup>0++</sup> | #  |
|----|-------------|-----------------|----------------|-------------------|----------------|-------------------|------|--------------------|-----------------|----------------|------------------|----------------|------------------|----|
| 1  | 114.091340  | 57.549308       |                |                   |                |                   | L    |                    |                 |                |                  |                |                  | 15 |
| 2  | 229.118283  | 115.062779      |                |                   | 211.107718     | 106.057497        | D    | 1541.707807        | 771.357542      | 1524.681258    | 762.844267       | 1523.697242    | 762.352259       | 14 |
| 3  | 326.171047  | 163.589161      |                |                   | 308.160482     | 154.583879        | P    | 1426.680864        | 713.844070      | 1409.654315    | 705.330796       | 1408.670299    | 704.838788       | 13 |
| 4  | 455.213640  | 228.110458      |                |                   | 437.203075     | 219.105176        | E    | 1329.628100        | 665.317688      | 1312.601551    | 656.804414       | 1311.617535    | 656.312406       | 12 |
| 5  | 552.266404  | 276.636840      |                |                   | 534.255839     | 267.631558        | P    | 1200.585507        | 600.796392      | 1183.558958    | 592.283117       | 1182.574942    | 591.791109       | 11 |
| 6  | 681.308997  | 341.158137      |                |                   | 663.298432     | 332.152854        | E    | <b>1103.532743</b> | 552.270010      | 1086.506194    | 543.756735       | 1085.522178    | 543.264727       | 10 |
| 7  | 809.403960  | 405.205618      | 792.377411     | 396.692344        | 791.393395     | 396.200336        | K    | 974.490150         | 487.748713      | 957.463601     | 479.235439       | 956.479585     | 478.743431       | 9  |
| 8  | 880.441074  | 440.724175      | 863.414525     | 432.210901        | 862.430509     | 431.718893        | A    | <b>846.395187</b>  | 423.701232      | 829.368638     | 415.187957       | 828.384622     | 414.695949       | 8  |
| 9  | 951.478188  | 476.242732      | 934.451639     | 467.729458        | 933.467623     | 467.237450        | A    | <b>775.358073</b>  | 388.182675      | 758.331524     | 379.669400       | 757.347508     | 379.177392       | 7  |
| 10 | 1080.520781 | 540.764028      | 1063.494232    | 532.250754        | 1062.510216    | 531.758746        | E    | <b>704.320959</b>  | 352.664118      | 687.294410     | 344.150843       | 686.310394     | 343.658835       | 6  |
| 11 | 1167.552809 | 584.280043      | 1150.526260    | <b>575.766768</b> | 1149.542244    | <b>575.274760</b> | S    | <b>575.278366</b>  | 288.142821      | 558.251817     | 279.629547       | 557.267801     | 279.137539       | 5  |
| 12 | 1280.600488 | 640.803882      | 1263.573939    | 632.290608        | 1262.589923    | 631.798600        | P    | 488.246338         | 244.626807      | 471.219789     | 236.113533       | 470.235773     | 235.621525       | 4  |
| 13 | 1367.632516 | 684.319896      | 1350.605967    | 675.806622        | 1349.621951    | 675.314614        | S    | 375.198659         | 188.102968      | 358.172110     | 179.589693       | 357.188094     | 179.097685       | 3  |
| 14 | 1480.680195 | 740.843736      | 1463.653646    | 732.330461        | 1462.669630    | 731.838453        | P    | 288.166631         | 144.586953      | 271.140082     | 136.073679       |                |                  | 2  |
| 15 |             |                 |                |                   |                |                   | R    | <b>175.118952</b>  | 88.063114       | 158.092403     | 79.549839        |                |                  | 1  |

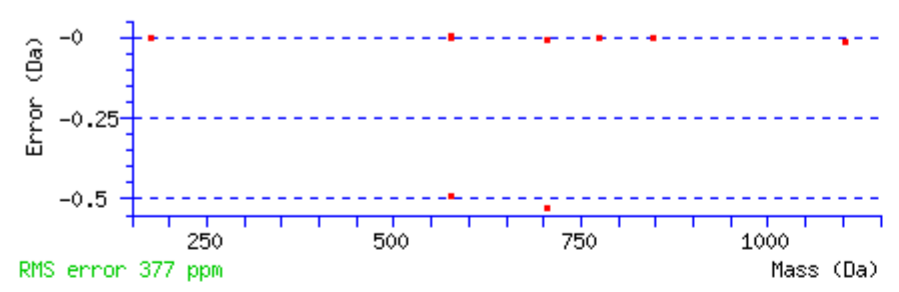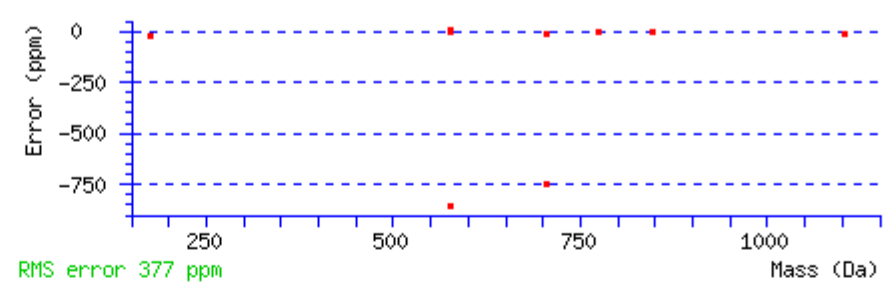

NCBI BLAST search of **LDPEPEKAAESPSPR**

(Parameters: blastp, nr protein database, expect=20000, no filter, PAM30)

Other BLAST [web gateways](#)

### All matches to this query

| Score | Mr(calc):   | Delta     | Sequence                         |
|-------|-------------|-----------|----------------------------------|
| 36.7  | 1653.784561 | -0.005119 | <a href="#">LDPEPEKAAESPSPR</a>  |
| 2.0   | 1653.784592 | -0.005150 | <a href="#">SDEIPATEPPQLPGR</a>  |
| 0.2   | 1653.778046 | 0.001396  | <a href="#">PNATPAPAQPESTAMR</a> |



# MASCOT SCIENCE Mascot Search Results

## Peptide View

### MS/MS Fragmentation of **LLASTTPEEILEK**

Found in **CO040\_HUMAN**, UPF0235 protein C15orf40 OS=Homo sapiens GN=C15orf40 PE=1 SV=1

Match to Query 37908: 1442.781208 from(722.397880,2+) rtinseconds(2763) index(27832)

Title: Locus:1.1.1.2510.28

Data file 2011-11-10 - TFD - EP 4-7.mgf

Click mouse within plot area to zoom in by factor of two about that point

Or, Plot from  to  Da

Label all possible matches  Label matches used for scoring

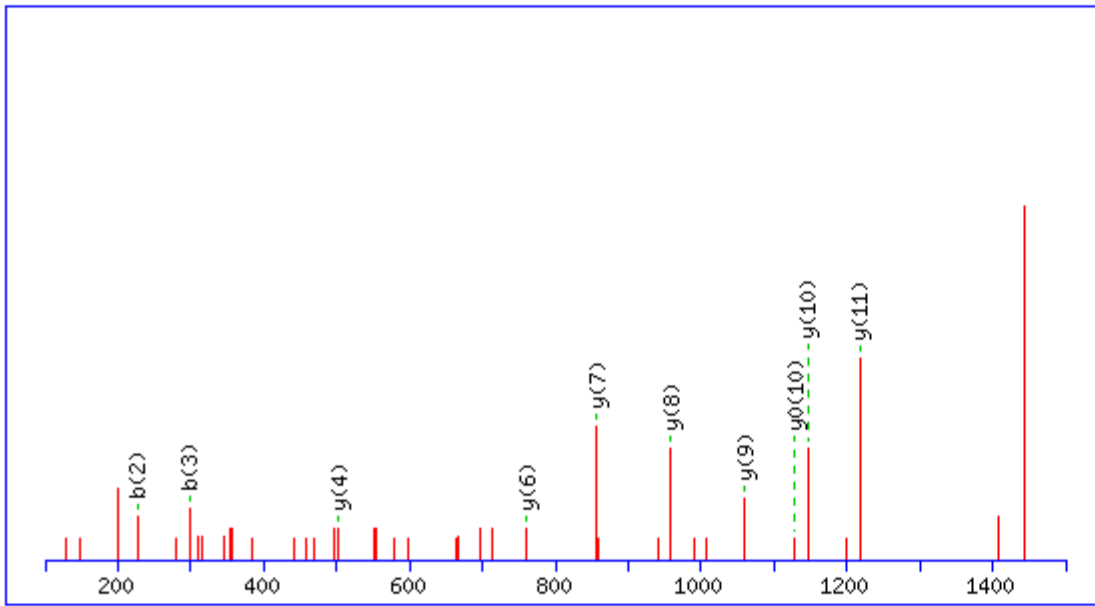

Monoisotopic mass of neutral peptide  $M_r(\text{calc})$ : 1442.786789

Fixed modifications: Propionamide (C) (apply to specified residues or termini only)

Ions Score: 43 Expect: 0.0002

Matches : 10/112 fragment ions using 22 most intense peaks [\(help\)](#)

| #  | b                 | b <sup>++</sup> | b <sup>0</sup> | b <sup>0++</sup> | Seq. | y                  | y <sup>++</sup> | y <sup>*</sup> | y <sup>*++</sup> | y <sup>0</sup>     | y <sup>0++</sup> | #  |
|----|-------------------|-----------------|----------------|------------------|------|--------------------|-----------------|----------------|------------------|--------------------|------------------|----|
| 1  | 114.091340        | 57.549308       |                |                  | L    |                    |                 |                |                  |                    |                  | 13 |
| 2  | <b>227.175404</b> | 114.091340      |                |                  | L    | 1330.710039        | 665.858658      | 1313.683490    | 657.345383       | 1312.699474        | 656.853375       | 12 |
| 3  | <b>298.212518</b> | 149.609897      |                |                  | A    | <b>1217.625975</b> | 609.316625      | 1200.599426    | 600.803351       | 1199.615410        | 600.311343       | 11 |
| 4  | 385.244546        | 193.125911      | 367.233981     | 184.120628       | S    | <b>1146.588861</b> | 573.798069      | 1129.562312    | 565.284794       | <b>1128.578296</b> | 564.792786       | 10 |
| 5  | 486.292225        | 243.649750      | 468.281660     | 234.644468       | T    | <b>1059.556833</b> | 530.282054      | 1042.530284    | 521.768780       | 1041.546268        | 521.276772       | 9  |
| 6  | 587.339904        | 294.173590      | 569.329339     | 285.168308       | T    | <b>958.509154</b>  | 479.758215      | 941.482605     | 471.244940       | 940.498589         | 470.752932       | 8  |
| 7  | 684.392668        | 342.699972      | 666.382103     | 333.694690       | P    | <b>857.461475</b>  | 429.234376      | 840.434926     | 420.721101       | 839.450910         | 420.229093       | 7  |
| 8  | 813.435261        | 407.221269      | 795.424696     | 398.215986       | E    | <b>760.408711</b>  | 380.707993      | 743.382162     | 372.194719       | 742.398146         | 371.702711       | 6  |
| 9  | 942.477854        | 471.742565      | 924.467289     | 462.737283       | E    | 631.366118         | 316.186697      | 614.339569     | 307.673422       | 613.355553         | 307.181414       | 5  |
| 10 | 1055.561918       | 528.284597      | 1037.551353    | 519.279315       | I    | <b>502.323525</b>  | 251.665400      | 485.296976     | 243.152126       | 484.312960         | 242.660118       | 4  |
| 11 | 1168.645982       | 584.826629      | 1150.635417    | 575.821347       | L    | 389.239461         | 195.123368      | 372.212912     | 186.610094       | 371.228896         | 186.118086       | 3  |
| 12 | 1297.688575       | 649.347925      | 1279.678010    | 640.342643       | E    | 276.155397         | 138.581336      | 259.128848     | 130.068062       | 258.144832         | 129.576054       | 2  |
| 13 |                   |                 |                |                  | K    | 147.112804         | 74.060040       | 130.086255     | 65.546765        |                    |                  | 1  |

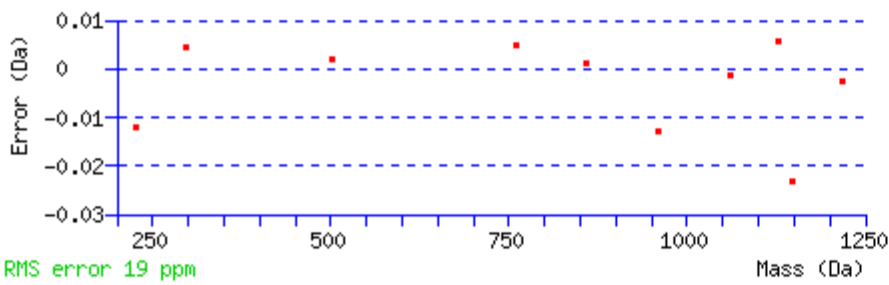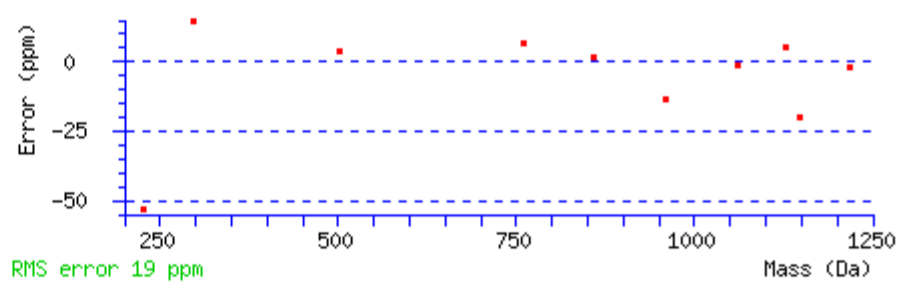

### NCBI BLAST search of **LLASTTPEEILEK**

(Parameters: blastp, nr protein database, expect=20000, no filter, PAM30)

Other BLAST [web gateways](#)

### All matches to this query

| Score | $M_r(\text{calc})$ : | Delta     | Sequence                      |
|-------|----------------------|-----------|-------------------------------|
| 43.3  | 1442.786789          | -0.005581 | <a href="#">LLASTTPEEILEK</a> |
| 3.8   | 1442.788132          | -0.006924 | <a href="#">LPEDLKNFRPAK</a>  |

# MASCOT SCIENCE Mascot Search Results

## Peptide View

MS/MS Fragmentation of **CLADAVVK**

Found in **CA151\_HUMAN**, UPF0327 protein C1orf151 OS=Homo sapiens GN=C1orf151 PE=1 SV=1

Match to Query 5270: 888.473828 from(445.244190,2+) rtinseconds(1616) index(5039)

Title: Locus:1.1.1.2250.7

Data file 2011-11-12 - TFD - EP 5-8.mgf

Click mouse within plot area to zoom in by factor of two about that point

Or, Plot from  to  Da

Label all possible matches  Label matches used for scoring

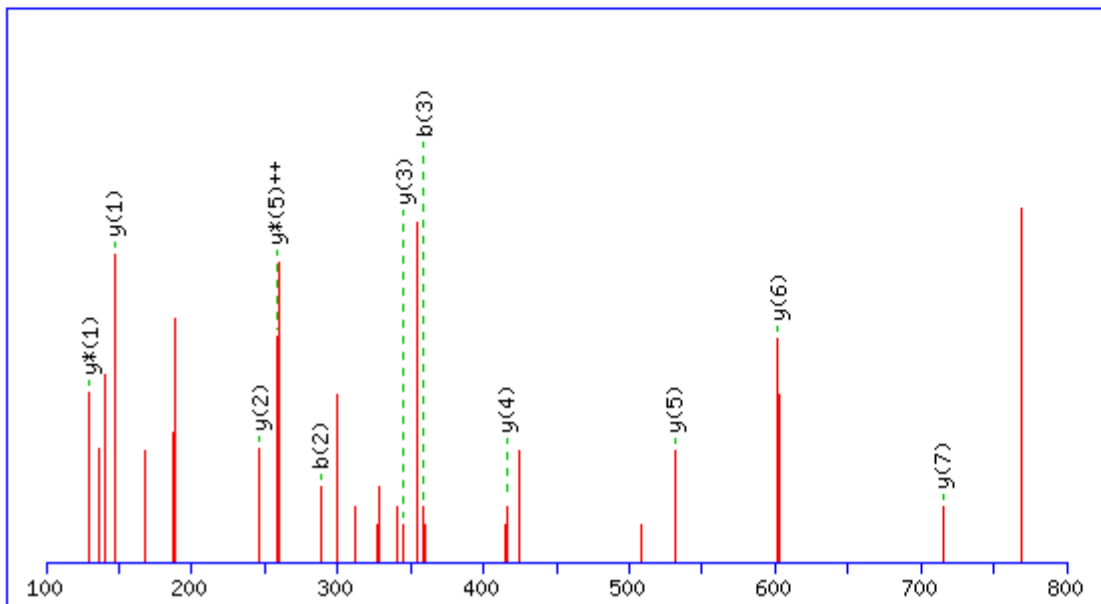

Monoisotopic mass of neutral peptide  $M_r(\text{calc})$ : 888.473877

Fixed modifications: Propionamide (C) (apply to specified residues or termini only)

Ions Score: 44 Expect: 0.0008

Matches : 11/56 fragment ions using 24 most intense peaks [\(help\)](#)

| # | b                 | b <sup>++</sup> | b <sup>0</sup> | b <sup>0++</sup> | Seq. | y                 | y <sup>++</sup> | y <sup>*</sup>    | y <sup>*++</sup>  | y <sup>0</sup> | y <sup>0++</sup> | # |
|---|-------------------|-----------------|----------------|------------------|------|-------------------|-----------------|-------------------|-------------------|----------------|------------------|---|
| 1 | 175.053575        | 88.030425       |                |                  | C    |                   |                 |                   |                   |                |                  | 8 |
| 2 | <b>288.137639</b> | 144.572457      |                |                  | L    | <b>715.434867</b> | 358.221072      | 698.408318        | 349.707797        | 697.424302     | 349.215789       | 7 |
| 3 | <b>359.174753</b> | 180.091014      |                |                  | A    | <b>602.350803</b> | 301.679040      | 585.324254        | 293.165765        | 584.340238     | 292.673757       | 6 |
| 4 | 474.201696        | 237.604486      | 456.191131     | 228.599203       | D    | <b>531.313689</b> | 266.160483      | 514.287140        | <b>257.647208</b> | 513.303124     | 257.155200       | 5 |
| 5 | 545.238810        | 273.123043      | 527.228245     | 264.117761       | A    | <b>416.286746</b> | 208.647011      | 399.260197        | 200.133736        |                |                  | 4 |
| 6 | 644.307224        | 322.657250      | 626.296659     | 313.651968       | V    | <b>345.249632</b> | 173.128454      | 328.223083        | 164.615179        |                |                  | 3 |
| 7 | 743.375638        | 372.191457      | 725.365073     | 363.186174       | V    | <b>246.181218</b> | 123.594247      | 229.154669        | 115.080972        |                |                  | 2 |
| 8 |                   |                 |                |                  | K    | <b>147.112804</b> | 74.060040       | <b>130.086255</b> | 65.546765         |                |                  | 1 |

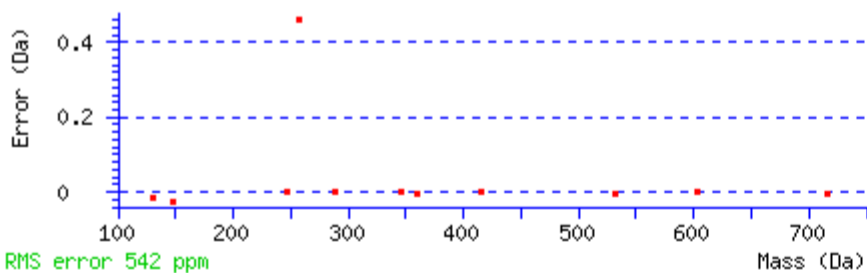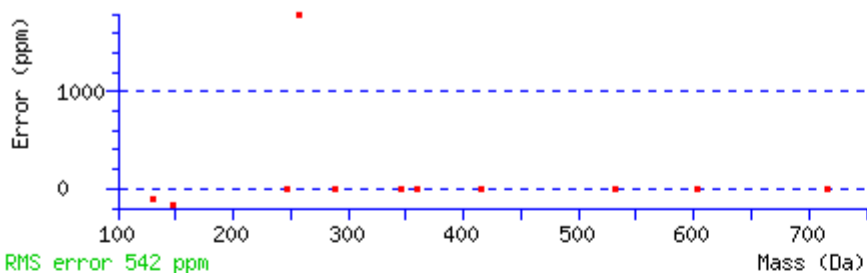

NCBI **BLAST** search of **CLADAVVK**

(Parameters: blastp, nr protein database, expect=20000, no filter, PAM30)

Other BLAST [web gateways](#)

## All matches to this query

| Score | $M_r(\text{calc})$ : | Delta     | Sequence                  |
|-------|----------------------|-----------|---------------------------|
| 43.7  | 888.473877           | -0.000049 | <a href="#">CLADAVVK</a>  |
| 17.6  | 888.466461           | 0.007367  | <a href="#">EQSEKLR</a>   |
| 13.7  | 888.473877           | -0.000049 | <a href="#">CSPTGLIK</a>  |
| 12.0  | 888.466476           | 0.007352  | <a href="#">DAASGSLLR</a> |
| 11.1  | 888.481720           | -0.007892 | <a href="#">ESARWIK</a>   |
| 10.3  | 888.466476           | 0.007352  | <a href="#">SEAASGVLR</a> |
| 10.1  | 888.473877           | -0.000049 | <a href="#">CGLGLDLK</a>  |
| 10.1  | 888.473892           | -0.000064 | <a href="#">CSVVLGPK</a>  |
| 9.6   | 888.473862           | -0.000034 | <a href="#">CIINLDK</a>   |
| 9.5   | 888.466476           | 0.007352  | <a href="#">ATSSAALPR</a> |

# MASCOT Search Results

## Peptide View

MS/MS Fragmentation of **TNLATGIPSSK**

Found in **CT030\_HUMAN**, UPF0414 transmembrane protein C20orf30 OS=Homo sapiens GN=C20orf30 PE=1 SV=1

Match to Query 25374: 1087.577308 from(544.795930,2+) rtinseconds(1599) index(13420)

Title: Locus:1.1.1.1827.28

Data file 2011-11-12 - TFD - EP 5-6.mgf

Click mouse within plot area to zoom in by factor of two about that point

Or, Plot from  to  Da

Label all possible matches  Label matches used for scoring

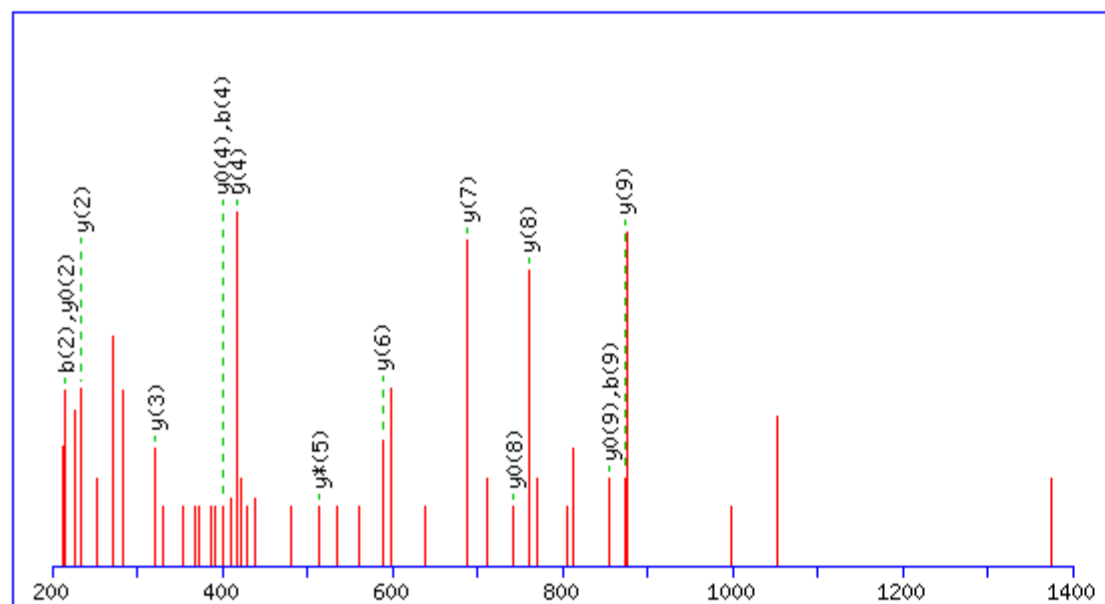

Monoisotopic mass of neutral peptide  $M_r(\text{calc})$ : 1087.587326

Fixed modifications: Propionamide (C) (apply to specified residues or termini only)

Ions Score: 39 Expect: 0.00042

Matches : 15/116 fragment ions using 28 most intense peaks [\(help\)](#)

| #  | b                 | b <sup>++</sup> | b*         | b <sup>*++</sup> | b <sup>0</sup> | b <sup>0++</sup> | Seq. | y                 | y <sup>++</sup> | y*                | y <sup>*++</sup> | y <sup>0</sup>    | y <sup>0++</sup> | #  |
|----|-------------------|-----------------|------------|------------------|----------------|------------------|------|-------------------|-----------------|-------------------|------------------|-------------------|------------------|----|
| 1  | 102.054955        | 51.531116       |            |                  | 84.044390      | 42.525833        | T    |                   |                 |                   |                  |                   |                  | 11 |
| 2  | <b>216.097882</b> | 108.552579      | 199.071333 | 100.039305       | 198.087317     | 99.547296        | N    | 987.546936        | 494.277106      | 970.520387        | 485.763832       | 969.536371        | 485.271824       | 10 |
| 3  | 329.181946        | 165.094611      | 312.155397 | 156.581336       | 311.171381     | 156.089328       | L    | <b>873.504009</b> | 437.255643      | 856.477460        | 428.742368       | <b>855.493444</b> | 428.250360       | 9  |
| 4  | <b>400.219060</b> | 200.613168      | 383.192511 | 192.099893       | 382.208495     | 191.607885       | A    | <b>760.419945</b> | 380.713611      | 743.393396        | 372.200336       | <b>742.409380</b> | 371.708328       | 8  |
| 5  | 501.266739        | 251.137007      | 484.240190 | 242.623733       | 483.256174     | 242.131725       | T    | <b>689.382831</b> | 345.195054      | 672.356282        | 336.681779       | 671.372266        | 336.189771       | 7  |
| 6  | 558.288203        | 279.647740      | 541.261654 | 271.134465       | 540.277638     | 270.642457       | G    | <b>588.335152</b> | 294.671214      | 571.308603        | 286.157940       | 570.324587        | 285.665932       | 6  |
| 7  | 671.372267        | 336.189772      | 654.345718 | 327.676497       | 653.361702     | 327.184489       | I    | 531.313688        | 266.160482      | <b>514.287139</b> | 257.647208       | 513.303123        | 257.155200       | 5  |
| 8  | 768.425031        | 384.716154      | 751.398482 | 376.202879       | 750.414466     | 375.710871       | P    | <b>418.229624</b> | 209.618450      | 401.203075        | 201.105176       | <b>400.219059</b> | 200.613168       | 4  |
| 9  | <b>855.457059</b> | 428.232168      | 838.430510 | 419.718893       | 837.446494     | 419.226885       | S    | <b>321.176860</b> | 161.092068      | 304.150311        | 152.578794       | 303.166295        | 152.086786       | 3  |
| 10 | 942.489087        | 471.748182      | 925.462538 | 463.234907       | 924.478522     | 462.742899       | S    | <b>234.144832</b> | 117.576054      | 217.118283        | 109.062780       | <b>216.134267</b> | 108.570772       | 2  |
| 11 |                   |                 |            |                  |                |                  | K    | 147.112804        | 74.060040       | 130.086255        | 65.546766        |                   |                  | 1  |

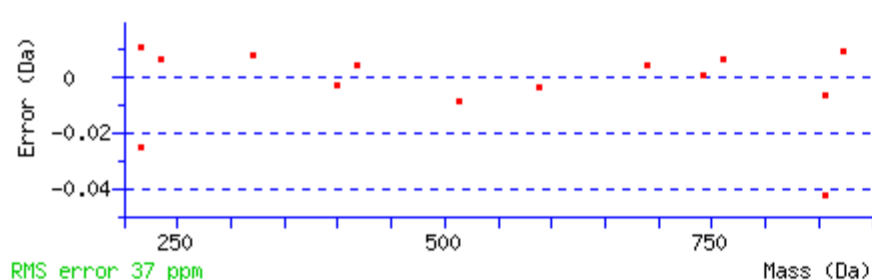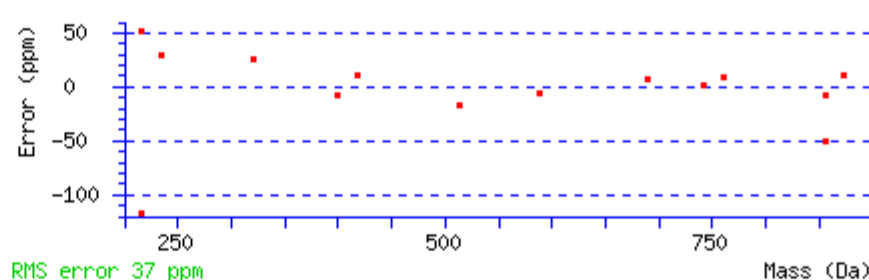

NCBI BLAST search of **TNLATGIPSSK**

(Parameters: blastp, nr protein database, expect=20000, no filter, PAM30)

Other BLAST [web gateways](#)

### All matches to this query

| Score | $M_r(\text{calc})$ : | Delta     | Sequence                    |
|-------|----------------------|-----------|-----------------------------|
| 39.1  | 1087.587326          | -0.010018 | <a href="#">TNLATGIPSSK</a> |
| 3.1   | 1087.569595          | 0.007713  | <a href="#">LVVVDGACGK</a>  |

Mascot: <http://www.matrixscience.com/>

# MASCOT SCIENCE Mascot Search Results

## Peptide View

### MS/MS Fragmentation of **MSFGLLR**

Found in **CV032\_HUMAN**, UPF0466 protein C22orf32, mitochondrial OS=Homo sapiens GN=C22orf32 PE=2 SV=1

Match to Query 2698: 838.444008 from(420.229280,2+) rtinseconds(2392) index(13562)

Title: Locus:1.1.1.2426.5

Data file 2011-11-12 - TFD - EP 6-8.mgf

Click mouse within plot area to zoom in by factor of two about that point

Or, Plot from  to  Da

Label all possible matches  Label matches used for scoring

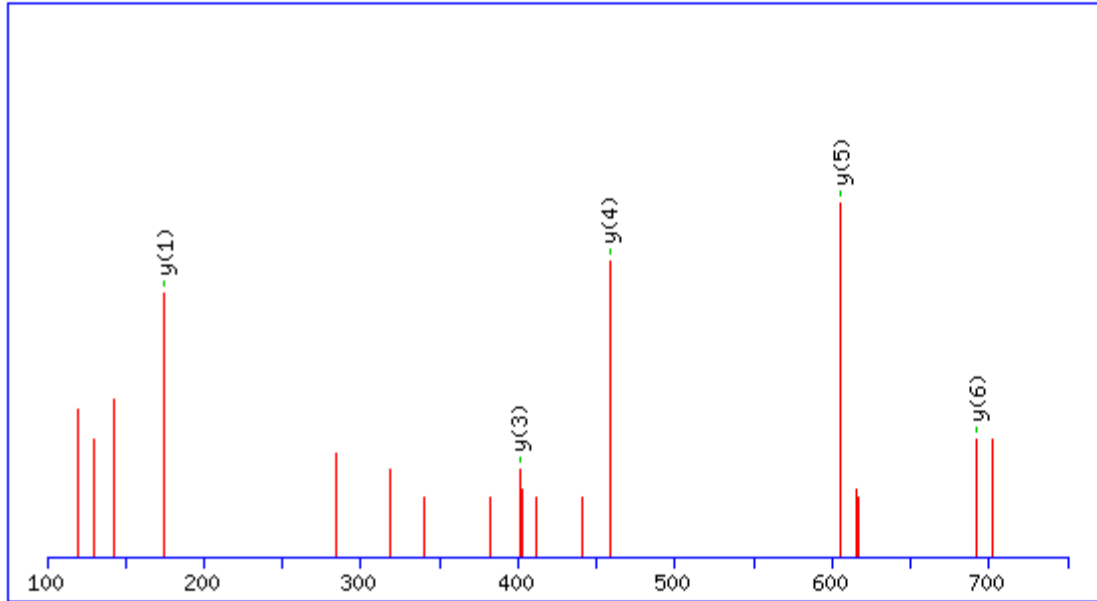

Monoisotopic mass of neutral peptide  $M_r(\text{calc})$ : 838.437103

Fixed modifications: Propionamide (C) (apply to specified residues or termini only)

Variable modifications:

M1 : Oxidation (M), with neutral losses 0.000000 (shown in table), 63.998285

Ions Score: 47 Expect: 5.4e-005

Matches : 5/70 fragment ions using 6 most intense peaks ([help](#))

| # | b          | b <sup>++</sup> | b <sup>0</sup> | b <sup>0++</sup> | Seq. | y          | y <sup>++</sup> | y <sup>*</sup> | y <sup>*++</sup> | y <sup>0</sup> | y <sup>0++</sup> | # |
|---|------------|-----------------|----------------|------------------|------|------------|-----------------|----------------|------------------|----------------|------------------|---|
| 1 | 148.042676 | 74.524976       |                |                  | M    |            |                 |                |                  |                |                  | 7 |
| 2 | 235.074704 | 118.040990      | 217.064139     | 109.035707       | S    | 692.408986 | 346.708131      | 675.382437     | 338.194857       | 674.398421     | 337.702849       | 6 |
| 3 | 382.143118 | 191.575197      | 364.132553     | 182.569914       | F    | 605.376958 | 303.192117      | 588.350409     | 294.678843       |                |                  | 5 |
| 4 | 439.164582 | 220.085929      | 421.154017     | 211.080646       | G    | 458.308544 | 229.657910      | 441.281995     | 221.144636       |                |                  | 4 |
| 5 | 552.248646 | 276.627961      | 534.238081     | 267.622679       | L    | 401.287080 | 201.147178      | 384.260531     | 192.633904       |                |                  | 3 |
| 6 | 665.332710 | 333.169993      | 647.322145     | 324.164711       | L    | 288.203016 | 144.605146      | 271.176467     | 136.091872       |                |                  | 2 |
| 7 |            |                 |                |                  | R    | 175.118952 | 88.063114       | 158.092403     | 79.549840        |                |                  | 1 |

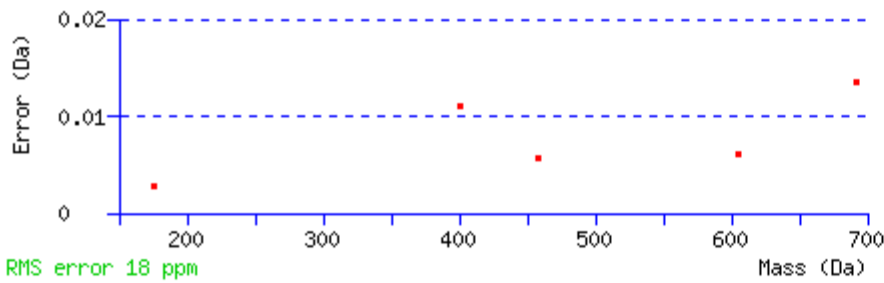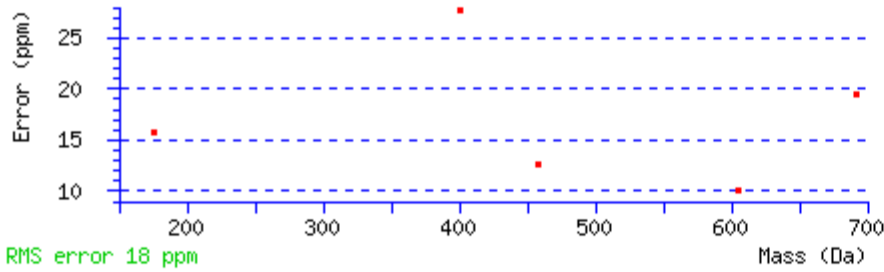

### NCBI BLAST search of **MSFGLLR**

(Parameters: blastp, nr protein database, expect=20000, no filter, PAM30)

Other BLAST [web gateways](#)

### All matches to this query

| Score | $M_r(\text{calc})$ | Delta    | Sequence                |
|-------|--------------------|----------|-------------------------|
| 47.4  | 838.437103         | 0.006905 | <a href="#">MSFGLLR</a> |
| 1.8   | 838.440933         | 0.003075 | <a href="#">PHSQKSR</a> |
| 1.4   | 838.440933         | 0.003075 | <a href="#">QPRPADR</a> |
| 0.8   | 838.437103         | 0.006905 | <a href="#">MLPPPPR</a> |
| 0.8   | 838.437103         | 0.006905 | <a href="#">MLPPPPR</a> |
| 0.8   | 838.437103         | 0.006905 | <a href="#">MLPPPPR</a> |
| 0.6   | 838.437103         | 0.006905 | <a href="#">MLGFLSR</a> |

# Mascot Search Results

## Peptide View

MS/MS Fragmentation of **QPLGPDGSQGFK**

Found in **CA144\_HUMAN**, UPF0485 protein C1orf144 OS=Homo sapiens GN=C1orf144 PE=1 SV=1

Match to Query 37035: 1229.603508 from(615.809030,2+) rtinseconds(1716) index(15523)

Title: Locus:1.1.1.1908.41

Data file 2011-11-10 - TFD - EP 4-6.mgf

Click mouse within plot area to zoom in by factor of two about that point

Or, Plot from  to  Da

Label all possible matches  Label matches used for scoring

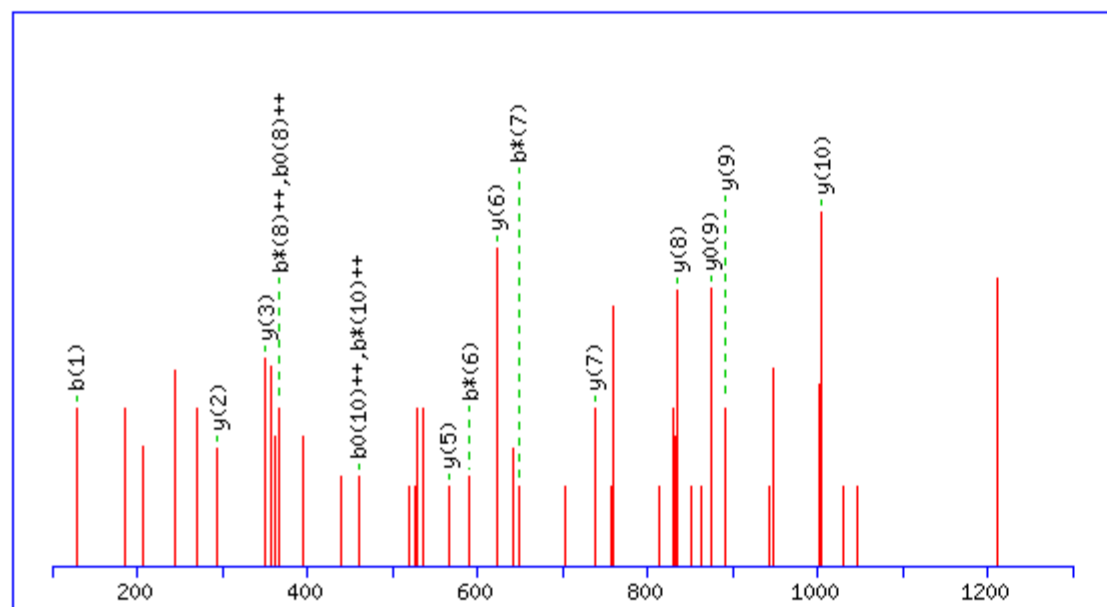

Monoisotopic mass of neutral peptide Mr(calc): 1229.604065

Fixed modifications: Propionamide (C) (apply to specified residues or termini only)

Ions Score: 32 Expect: 0.0097

Matches : 16/114 fragment ions using 36 most intense peaks [\(help\)](#)

| #  | b           | b <sup>++</sup> | b <sup>*</sup> | b <sup>+++</sup> | b <sup>0</sup> | b <sup>0++</sup> | Seq. | y           | y <sup>++</sup> | y <sup>*</sup> | y <sup>+++</sup> | y <sup>0</sup> | y <sup>0++</sup> | #  |
|----|-------------|-----------------|----------------|------------------|----------------|------------------|------|-------------|-----------------|----------------|------------------|----------------|------------------|----|
| 1  | 129.065854  | 65.036565       | 112.039305     | 56.523291        |                |                  | Q    |             |                 |                |                  |                |                  | 12 |
| 2  | 226.118618  | 113.562947      | 209.092069     | 105.049673       |                |                  | P    | 1102.552751 | 551.780014      | 1085.526202    | 543.266739       | 1084.542186    | 542.774731       | 11 |
| 3  | 339.202682  | 170.104979      | 322.176133     | 161.591704       |                |                  | L    | 1005.499987 | 503.253632      | 988.473438     | 494.740357       | 987.489422     | 494.248349       | 10 |
| 4  | 396.224146  | 198.615711      | 379.197597     | 190.102436       |                |                  | G    | 892.415923  | 446.711600      | 875.389374     | 438.198325       | 874.405358     | 437.706317       | 9  |
| 5  | 493.276910  | 247.142093      | 476.250361     | 238.628818       |                |                  | P    | 835.394459  | 418.200868      | 818.367910     | 409.687593       | 817.383894     | 409.195585       | 8  |
| 6  | 608.303853  | 304.655565      | 591.277304     | 296.142290       | 590.293288     | 295.650282       | D    | 738.341695  | 369.674486      | 721.315146     | 361.161211       | 720.331130     | 360.669203       | 7  |
| 7  | 665.325317  | 333.166297      | 648.298768     | 324.653022       | 647.314752     | 324.161014       | G    | 623.314752  | 312.161014      | 606.288203     | 303.647740       | 605.304187     | 303.155732       | 6  |
| 8  | 752.357345  | 376.682311      | 735.330796     | 368.169036       | 734.346780     | 367.677028       | S    | 566.293288  | 283.650282      | 549.266739     | 275.137008       | 548.282723     | 274.645000       | 5  |
| 9  | 880.415923  | 440.711600      | 863.389374     | 432.198325       | 862.405358     | 431.706317       | Q    | 479.261260  | 240.134268      | 462.234711     | 231.620994       |                |                  | 4  |
| 10 | 937.437387  | 469.222332      | 920.410838     | 460.709057       | 919.426822     | 460.217049       | G    | 351.202682  | 176.104979      | 334.176133     | 167.591704       |                |                  | 3  |
| 11 | 1084.505801 | 542.756539      | 1067.479252    | 534.243264       | 1066.495236    | 533.751256       | F    | 294.181218  | 147.594247      | 277.154669     | 139.080972       |                |                  | 2  |
| 12 |             |                 |                |                  |                |                  | K    | 147.112804  | 74.060040       | 130.086255     | 65.546765        |                |                  | 1  |

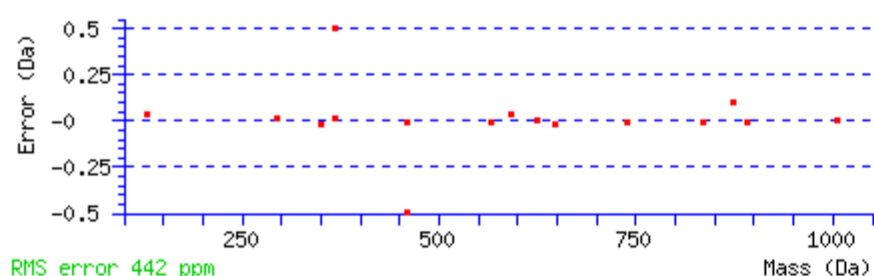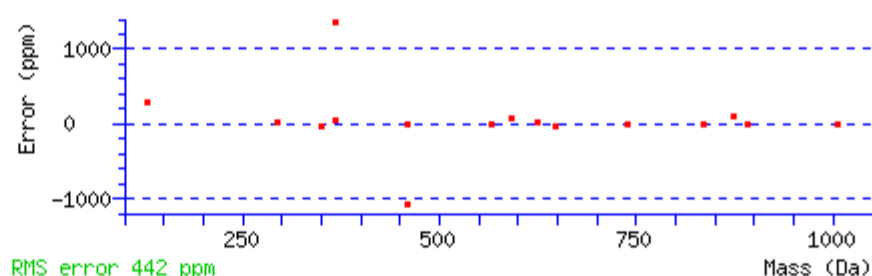

NCBI BLAST search of **QPLGPDGSQGFK**

(Parameters: blastp, nr protein database, expect=20000, no filter, PAM30)

Other BLAST [web gateways](#)

All matches to this query

| Score | Mr(calc):   | Delta     | Sequence                     |
|-------|-------------|-----------|------------------------------|
| 31.5  | 1229.604065 | -0.000557 | <a href="#">QPLGPDGSQGFK</a> |

Mascot: <http://www.matrixscience.com/>

**MATRIX SCIENCE Mascot Search Results**

**Peptide View**

MS/MS Fragmentation of **FVLITDILDTEFGK**

Found in **CP062\_HUMAN**, UPF0505 protein C16orf62 OS=Homo sapiens GN=C16orf62 PE=1 SV=2

Match to Query 46156: 1480.822228 from(741.418390,2+) rtinseconds(4821) index(70355)

Title: Locus:1.1.1.3205.10

Data file 2011-11-12 - TFD - EP 6-2.mgf

Click mouse within plot area to zoom in by factor of two about that point

Or, Plot from  to  Da

Label all possible matches  Label matches used for scoring

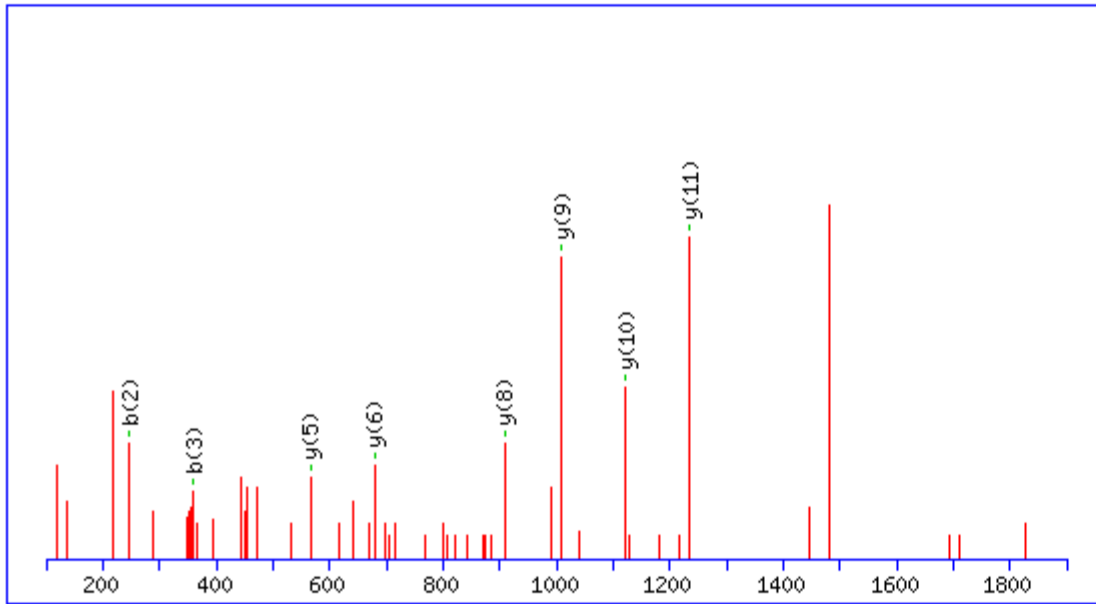

Monoisotopic mass of neutral peptide Mr(calc): 1480.817749

Fixed modifications: Propionamide (C) (apply to specified residues or termini only)

Ions Score: 42 Expect: 0.00021

Matches : 8/106 fragment ions using 13 most intense peaks [\(help\)](#)

| #  | b                 | b <sup>++</sup> | b <sup>0</sup> | b <sup>0++</sup> | Seq. | y                  | y <sup>++</sup> | y <sup>*</sup> | y <sup>*++</sup> | y <sup>0</sup> | y <sup>0++</sup> | #  |
|----|-------------------|-----------------|----------------|------------------|------|--------------------|-----------------|----------------|------------------|----------------|------------------|----|
| 1  | 148.075690        | 74.541483       |                |                  | F    |                    |                 |                |                  |                |                  | 13 |
| 2  | <b>247.144104</b> | 124.075690      |                |                  | V    | 1334.756596        | 667.881936      | 1317.730047    | 659.368662       | 1316.746031    | 658.876653       | 12 |
| 3  | <b>360.228168</b> | 180.617722      |                |                  | L    | <b>1235.688182</b> | 618.347729      | 1218.661633    | 609.834455       | 1217.677617    | 609.342447       | 11 |
| 4  | 473.312232        | 237.159754      |                |                  | I    | <b>1122.604118</b> | 561.805697      | 1105.577569    | 553.292423       | 1104.593553    | 552.800414       | 10 |
| 5  | 574.359911        | 287.683594      | 556.349346     | 278.678311       | T    | <b>1009.520054</b> | 505.263665      | 992.493505     | 496.750391       | 991.509489     | 496.258383       | 9  |
| 6  | 689.386854        | 345.197065      | 671.376289     | 336.191782       | D    | <b>908.472375</b>  | 454.739826      | 891.445826     | 446.226551       | 890.461810     | 445.734543       | 8  |
| 7  | 802.470918        | 401.739097      | 784.460353     | 392.733814       | I    | 793.445432         | 397.226354      | 776.418883     | 388.713080       | 775.434867     | 388.221072       | 7  |
| 8  | 915.554982        | 458.281129      | 897.544417     | 449.275847       | L    | <b>680.361368</b>  | 340.684322      | 663.334819     | 332.171048       | 662.350803     | 331.679040       | 6  |
| 9  | 1030.581925       | 515.794601      | 1012.571360    | 506.789318       | D    | <b>567.277304</b>  | 284.142290      | 550.250755     | 275.629016       | 549.266739     | 275.137008       | 5  |
| 10 | 1131.629604       | 566.318440      | 1113.619039    | 557.313157       | T    | 452.250361         | 226.628818      | 435.223812     | 218.115544       | 434.239796     | 217.623536       | 4  |
| 11 | 1278.698018       | 639.852647      | 1260.687453    | 630.847365       | F    | 351.202682         | 176.104979      | 334.176133     | 167.591704       |                |                  | 3  |
| 12 | 1335.719482       | 668.363379      | 1317.708917    | 659.358096       | G    | 204.134268         | 102.570772      | 187.107719     | 94.057497        |                |                  | 2  |
| 13 |                   |                 |                |                  | K    | 147.112804         | 74.060040       | 130.086255     | 65.546765        |                |                  | 1  |

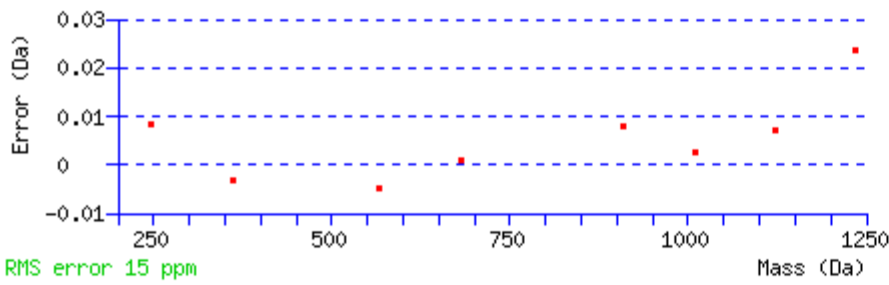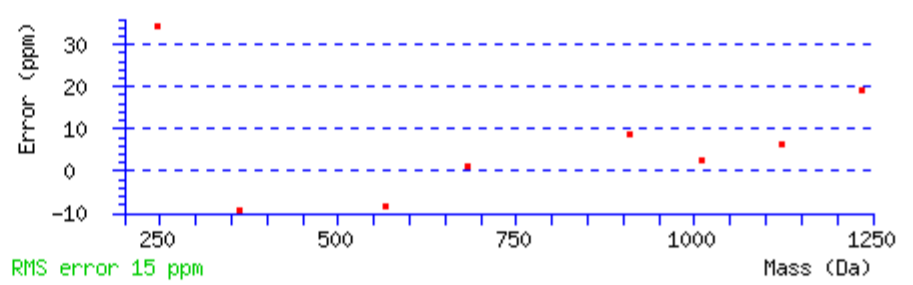

NCBI BLAST search of **FVLITDILDTEFGK**

(Parameters: blastp, nr protein database, expect=20000, no filter, PAM30)

Other BLAST [web gateways](#)

**All matches to this query**

| Score | Mr(calc):   | Delta    | Sequence                       |
|-------|-------------|----------|--------------------------------|
| 42.1  | 1480.817749 | 0.004479 | <a href="#">FVLITDILDTEFGK</a> |
| 2.9   | 1480.819077 | 0.003151 | <a href="#">FVIFDLHRPPPK</a>   |
| 2.9   | 1480.819077 | 0.003151 | <a href="#">FVIFDLHRPPPK</a>   |
| 2.9   | 1480.819077 | 0.003151 | <a href="#">FVIFDLHRPPPK</a>   |

**Peptide View**

MS/MS Fragmentation of **GNEIEPNFSATR**  
 Found in **CO038\_HUMAN**, UPF0552 protein C15orf38 OS=Homo sapiens GN=C15orf38 PE=1 SV=1

Match to Query 36331: 1333.626588 from(667.820570,2+) rtinseconds(1984) index(18155)  
 Title: Locus:1.1.1.2341.40  
 Data file 2011-11-12 - TFD - EP 5-5.mgf

Click mouse within plot area to zoom in by factor of two about that point

Or, Plot from  to  Da

Label all possible matches  Label matches used for scoring

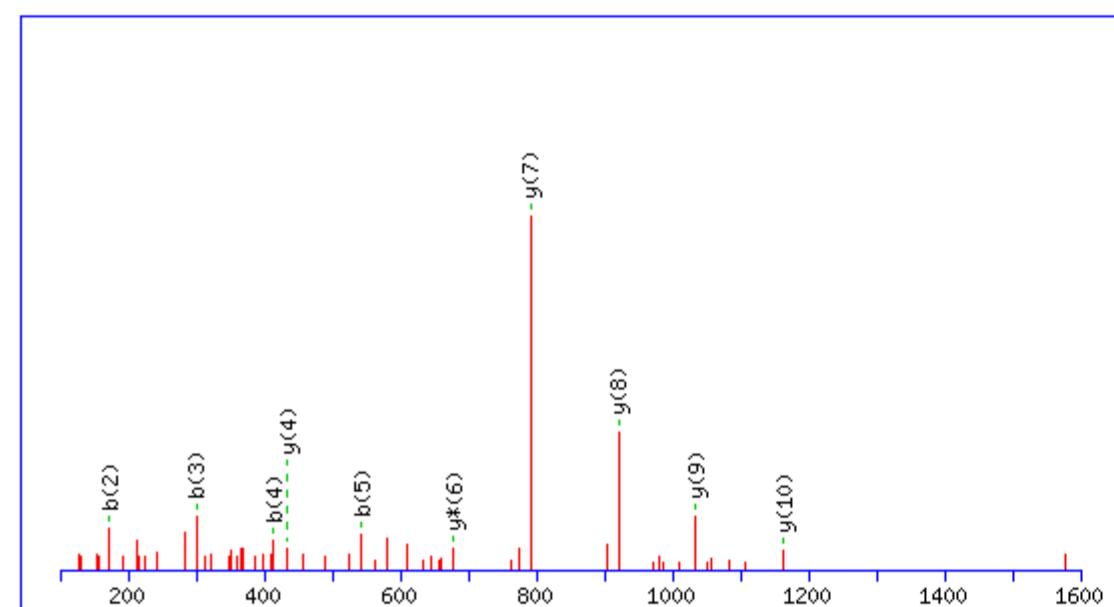

Monoisotopic mass of neutral peptide  $M_r(\text{calc})$ : 1333.626221  
 Fixed modifications: Propionamide (C) (apply to specified residues or termini only)  
 Ions Score: 43 Expect: 0.00058  
 Matches : 10/124 fragment ions using 11 most intense peaks ([help](#))

| #  | b           | b <sup>++</sup> | b <sup>*</sup> | b <sup>*++</sup> | b <sup>0</sup> | b <sup>0++</sup> | Seq. | y           | y <sup>++</sup> | y <sup>*</sup> | y <sup>*++</sup> | y <sup>0</sup> | y <sup>0++</sup> | #  |
|----|-------------|-----------------|----------------|------------------|----------------|------------------|------|-------------|-----------------|----------------|------------------|----------------|------------------|----|
| 1  | 58.028740   | 29.518008       |                |                  |                |                  | G    |             |                 |                |                  |                |                  | 12 |
| 2  | 172.071667  | 86.539471       | 155.045118     | 78.026197        |                |                  | N    | 1277.612055 | 639.309666      | 1260.585506    | 630.796391       | 1259.601490    | 630.304383       | 11 |
| 3  | 301.114260  | 151.060768      | 284.087711     | 142.547494       | 283.103695     | 142.055486       | E    | 1163.569128 | 582.288202      | 1146.542579    | 573.774927       | 1145.558563    | 573.282919       | 10 |
| 4  | 414.198324  | 207.602800      | 397.171775     | 199.089526       | 396.187759     | 198.597518       | I    | 1034.526535 | 517.766906      | 1017.499986    | 509.253631       | 1016.515970    | 508.761623       | 9  |
| 5  | 543.240917  | 272.124097      | 526.214368     | 263.610822       | 525.230352     | 263.118814       | E    | 921.442471  | 461.224874      | 904.415922     | 452.711599       | 903.431906     | 452.219591       | 8  |
| 6  | 640.293681  | 320.650479      | 623.267132     | 312.137204       | 622.283116     | 311.645196       | P    | 792.399878  | 396.703577      | 775.373329     | 388.190302       | 774.389313     | 387.698294       | 7  |
| 7  | 754.336608  | 377.671942      | 737.310059     | 369.158668       | 736.326043     | 368.666660       | N    | 695.347114  | 348.177195      | 678.320565     | 339.663920       | 677.336549     | 339.171912       | 6  |
| 8  | 901.405022  | 451.206149      | 884.378473     | 442.692875       | 883.394457     | 442.200867       | F    | 581.304187  | 291.155732      | 564.277638     | 282.642457       | 563.293622     | 282.150449       | 5  |
| 9  | 988.437050  | 494.722163      | 971.410501     | 486.208889       | 970.426485     | 485.716881       | S    | 434.235773  | 217.621524      | 417.209224     | 209.108250       | 416.225208     | 208.616242       | 4  |
| 10 | 1059.474164 | 530.240720      | 1042.447615    | 521.727446       | 1041.463599    | 521.235437       | A    | 347.203745  | 174.105510      | 330.177196     | 165.592236       | 329.193180     | 165.100228       | 3  |
| 11 | 1160.521843 | 580.764560      | 1143.495294    | 572.251285       | 1142.511278    | 571.759277       | T    | 276.166631  | 138.586953      | 259.140082     | 130.073679       | 258.156066     | 129.581671       | 2  |
| 12 |             |                 |                |                  |                |                  | R    | 175.118952  | 88.063114       | 158.092403     | 79.549839        |                |                  | 1  |

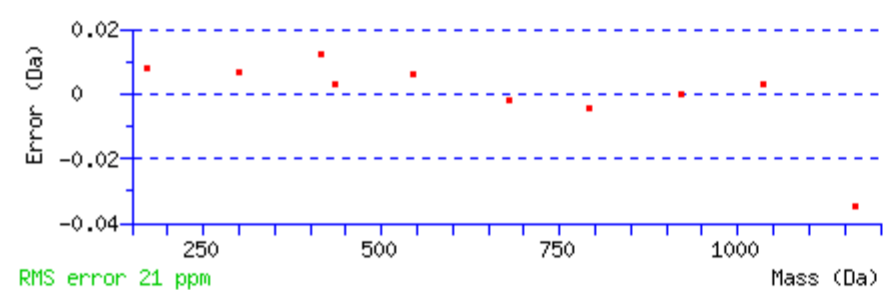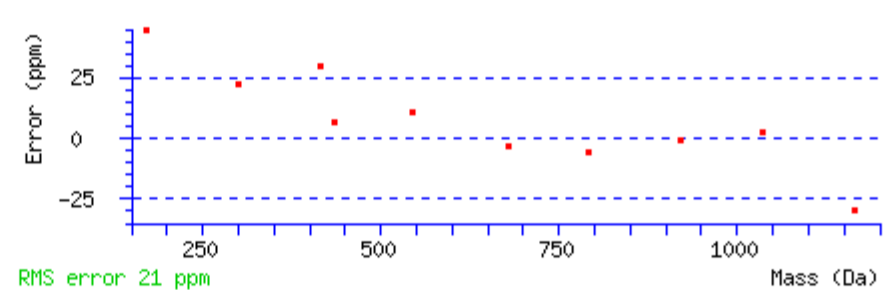

NCBI BLAST search of **GNEIEPNFSATR**  
 (Parameters: blastp, nr protein database, expect=20000, no filter, PAM30)  
 Other BLAST [web gateways](#)

**All matches to this query**

| Score | $M_r(\text{calc})$ : | Delta     | Sequence                      |
|-------|----------------------|-----------|-------------------------------|
| 42.5  | 1333.626221          | 0.000367  | <a href="#">GNEIEPNFSATR</a>  |
| 11.2  | 1333.626282          | 0.000306  | <a href="#">GPSGPQGGPPGPK</a> |
| 4.8   | 1333.629593          | -0.003005 | <a href="#">INSVEQNDMLR</a>   |
| 3.8   | 1333.618393          | 0.008195  | <a href="#">GVCVPNGLSLSSD</a> |
| 2.7   | 1333.626282          | 0.000306  | <a href="#">GPSGPQGGPPGPK</a> |

**MATRIX SCIENCE Mascot Search Results**

**Peptide View**

MS/MS Fragmentation of **SVEESAGLVGLK**

Found in **CG055\_HUMAN**, UPF0562 protein C7orf55 OS=Homo sapiens GN=C7orf55 PE=1 SV=2

Match to Query 25951: 1187.630188 from(594.822370,2+) rtinseconds(2248) index(20953)

Title: Locus:1.1.1.2184.20

Data file 2011-11-12 - TFD - EP 5-7.mgf

Click mouse within plot area to zoom in by factor of two about that point

Or, Plot from  to  Da

Label all possible matches  Label matches used for scoring

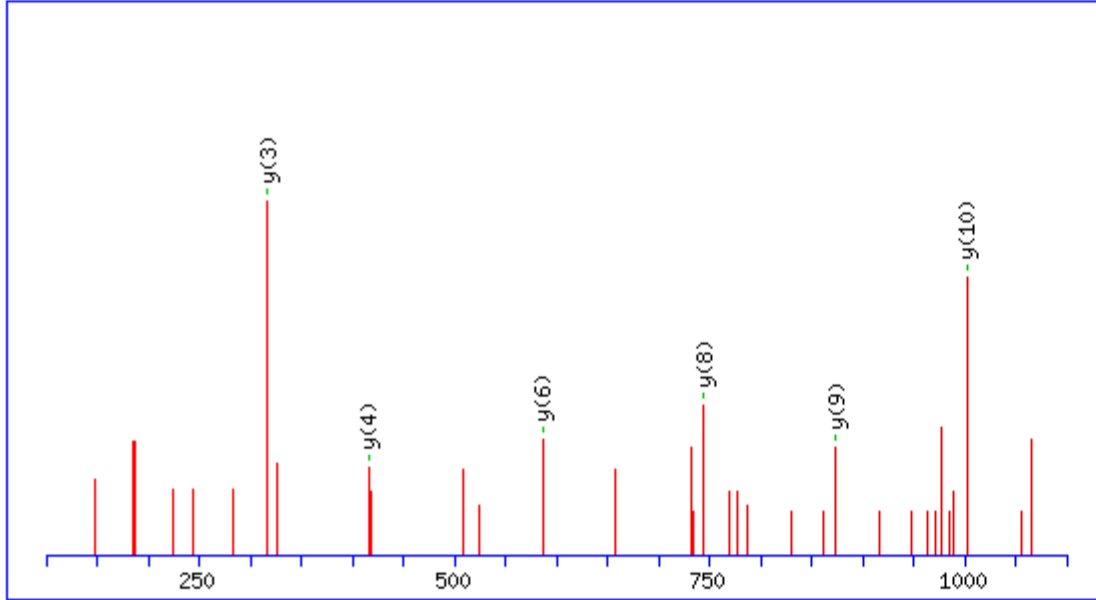

Monoisotopic mass of neutral peptide Mr(calc): 1187.639755

Fixed modifications: Propionamide (C) (apply to specified residues or termini only)

Ions Score: 42 Expect: 0.00095

Matches : 6/96 fragment ions using 10 most intense peaks ([help](#))

| #  | b           | b <sup>++</sup> | b <sup>0</sup> | b <sup>0++</sup> | Seq. | y                  | y <sup>++</sup> | y <sup>*</sup> | y <sup>*++</sup> | y <sup>0</sup> | y <sup>0++</sup> | #  |
|----|-------------|-----------------|----------------|------------------|------|--------------------|-----------------|----------------|------------------|----------------|------------------|----|
| 1  | 88.039304   | 44.523290       | 70.028739      | 35.518008        | S    |                    |                 |                |                  |                |                  | 12 |
| 2  | 187.107718  | 94.057497       | 169.097153     | 85.052214        | V    | 1101.615016        | 551.311146      | 1084.588467    | 542.797872       | 1083.604451    | 542.305863       | 11 |
| 3  | 316.150311  | 158.578793      | 298.139746     | 149.573511       | E    | <b>1002.546602</b> | 501.776939      | 985.520053     | 493.263665       | 984.536037     | 492.771657       | 10 |
| 4  | 445.192904  | 223.100090      | 427.182339     | 214.094808       | E    | <b>873.504009</b>  | 437.255643      | 856.477460     | 428.742368       | 855.493444     | 428.250360       | 9  |
| 5  | 532.224932  | 266.616104      | 514.214367     | 257.610822       | S    | <b>744.461416</b>  | 372.734346      | 727.434867     | 364.221072       | 726.450851     | 363.729064       | 8  |
| 6  | 603.262046  | 302.134661      | 585.251481     | 293.129379       | A    | 657.429388         | 329.218332      | 640.402839     | 320.705058       |                |                  | 7  |
| 7  | 660.283510  | 330.645393      | 642.272945     | 321.640111       | G    | <b>586.392274</b>  | 293.699775      | 569.365725     | 285.186501       |                |                  | 6  |
| 8  | 773.367574  | 387.187425      | 755.357009     | 378.182143       | L    | 529.370810         | 265.189043      | 512.344261     | 256.675769       |                |                  | 5  |
| 9  | 872.435988  | 436.721632      | 854.425423     | 427.716350       | V    | <b>416.286746</b>  | 208.647011      | 399.260197     | 200.133736       |                |                  | 4  |
| 10 | 929.457452  | 465.232364      | 911.446887     | 456.227082       | G    | <b>317.218332</b>  | 159.112804      | 300.191783     | 150.599529       |                |                  | 3  |
| 11 | 1042.541516 | 521.774396      | 1024.530951    | 512.769114       | L    | 260.196868         | 130.602072      | 243.170319     | 122.088797       |                |                  | 2  |
| 12 |             |                 |                |                  | K    | 147.112804         | 74.060040       | 130.086255     | 65.546765        |                |                  | 1  |

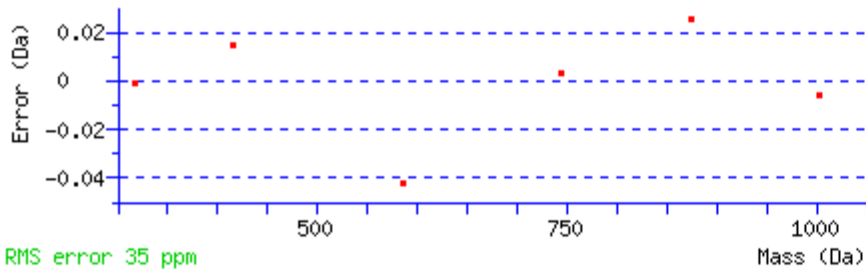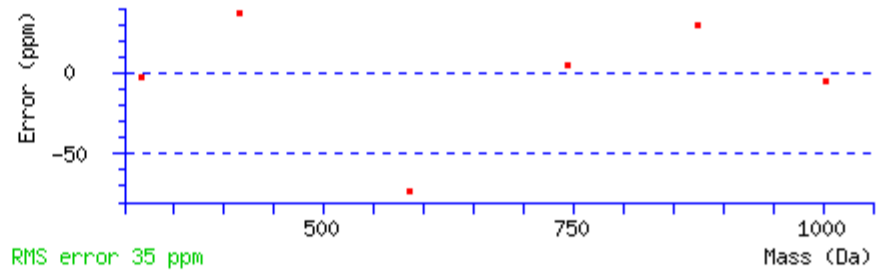

NCBI BLAST search of **SVEESAGLVGLK**

(Parameters: blastp, nr protein database, expect=20000, no filter, PAM30)

Other BLAST [web gateways](#)

All matches to this query

| Score | Mr(calc):   | Delta     | Sequence                     |
|-------|-------------|-----------|------------------------------|
| 41.5  | 1187.639755 | -0.009567 | <a href="#">SVEESAGLVGLK</a> |
| 8.7   | 1187.618622 | 0.011566  | <a href="#">WLEEVSQVAK</a>   |
| 6.3   | 1187.626694 | 0.003494  | <a href="#">IVRCICPSR</a>    |
| 3.8   | 1187.629852 | 0.000336  | <a href="#">DPNFEALVRK</a>   |
| 0.3   | 1187.629868 | 0.000320  | <a href="#">QIGKQEGGPFK</a>  |



# MASCOT SEARCH RESULTS

## Peptide View

MS/MS Fragmentation of **DTALLEDLGK**

Found in **CP013\_HUMAN**, UPF0585 protein C16orf13 OS=Homo sapiens GN=C16orf13 PE=1 SV=2

Match to Query 21659: 1073.557528 from(537.786040,2+) rtinseconds(2762) index(35446)

Title: Locus:1.1.1.2366.15

Data file 2011-11-10 - TFD - EP 4-5.mgf

Click mouse within plot area to zoom in by factor of two about that point

Or, Plot from  to  Da

Label all possible matches  Label matches used for scoring

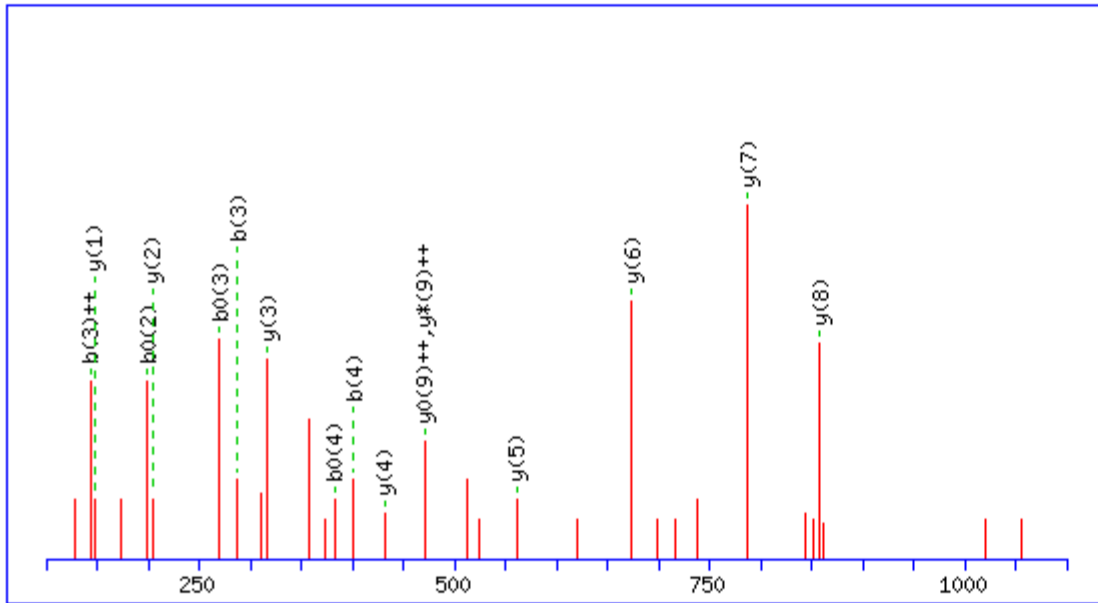

Monoisotopic mass of neutral peptide Mr(calc): 1073.560440

Fixed modifications: Propionamide (C) (apply to specified residues or termini only)

Ions Score: 57 Expect: 4.6e-005

Matches : 16/84 fragment ions using 29 most intense peaks ([help](#))

| #  | b          | b <sup>++</sup> | b <sup>0</sup> | b <sup>0++</sup> | Seq. | y          | y <sup>++</sup> | y <sup>*</sup> | y <sup>*++</sup> | y <sup>0</sup> | y <sup>0++</sup> | #  |
|----|------------|-----------------|----------------|------------------|------|------------|-----------------|----------------|------------------|----------------|------------------|----|
| 1  | 116.034219 | 58.520748       | 98.023654      | 49.515465        | D    |            |                 |                |                  |                |                  | 10 |
| 2  | 217.081898 | 109.044587      | 199.071333     | 100.039304       | T    | 959.540789 | 480.274033      | 942.514240     | 471.760758       | 941.530224     | 471.268750       | 9  |
| 3  | 288.119012 | 144.563144      | 270.108447     | 135.557862       | A    | 858.493110 | 429.750193      | 841.466561     | 421.236919       | 840.482545     | 420.744911       | 8  |
| 4  | 401.203076 | 201.105176      | 383.192511     | 192.099894       | L    | 787.455996 | 394.231636      | 770.429447     | 385.718362       | 769.445431     | 385.226354       | 7  |
| 5  | 514.287140 | 257.647208      | 496.276575     | 248.641926       | L    | 674.371932 | 337.689604      | 657.345383     | 329.176330       | 656.361367     | 328.684322       | 6  |
| 6  | 643.329733 | 322.168505      | 625.319168     | 313.163222       | E    | 561.287868 | 281.147572      | 544.261319     | 272.634298       | 543.277303     | 272.142290       | 5  |
| 7  | 758.356676 | 379.681976      | 740.346111     | 370.676694       | D    | 432.245275 | 216.626276      | 415.218726     | 208.113001       | 414.234710     | 207.620993       | 4  |
| 8  | 871.440740 | 436.224008      | 853.430175     | 427.218726       | L    | 317.218332 | 159.112804      | 300.191783     | 150.599530       |                |                  | 3  |
| 9  | 928.462204 | 464.734740      | 910.451639     | 455.729458       | G    | 204.134268 | 102.570772      | 187.107719     | 94.057498        |                |                  | 2  |
| 10 |            |                 |                |                  | K    | 147.112804 | 74.060040       | 130.086255     | 65.546766        |                |                  | 1  |

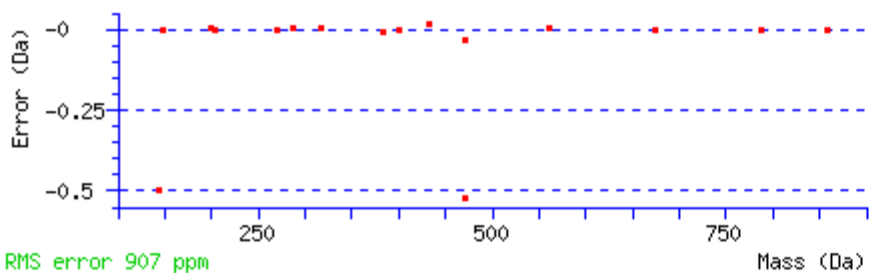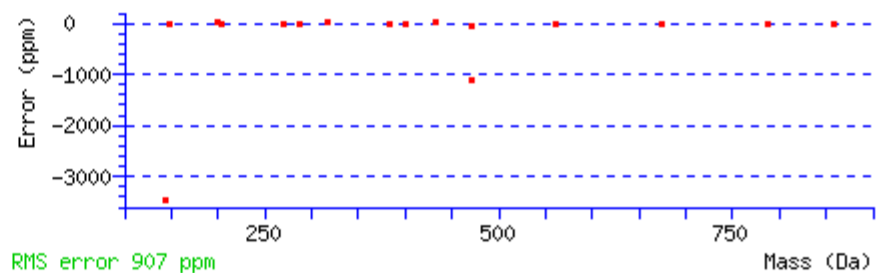

NCBI BLAST search of **DTALLEDLGK**

(Parameters: blastp, nr protein database, expect=20000, no filter, PAM30)

Other BLAST [web gateways](#)

## All matches to this query

| Score | Mr(calc):   | Delta     | Sequence                    |
|-------|-------------|-----------|-----------------------------|
| 56.7  | 1073.560440 | -0.002912 | <a href="#">DTALLEDLGK</a>  |
| 17.7  | 1073.550537 | 0.006991  | <a href="#">EGTLWEALR</a>   |
| 11.2  | 1073.565125 | -0.007597 | <a href="#">SLGANMAAALR</a> |
| 9.2   | 1073.563126 | -0.005598 | <a href="#">RWGHHLPR</a>    |
| 6.7   | 1073.550552 | 0.006976  | <a href="#">VNEWKTPGK</a>   |
| 1.9   | 1073.550552 | 0.006976  | <a href="#">EFVNPSLPR</a>   |
| 1.6   | 1073.560440 | -0.002912 | <a href="#">TDAETLPALK</a>  |
| 0.4   | 1073.550552 | 0.006976  | <a href="#">DTLASLPWR</a>   |
| 0.3   | 1073.565140 | -0.007612 | <a href="#">RECLTPIR</a>    |
| 0.3   | 1073.565125 | -0.007597 | <a href="#">SNLMNNILR</a>   |

Mascot: <http://www.matrixscience.com/>

# MASCOT Search Results

## Peptide View

MS/MS Fragmentation of **LLSVVPVPEGYSVK**

Found in **CT027\_HUMAN**, UPF0687 protein C20orf27 OS=Homo sapiens GN=C20orf27 PE=1 SV=3

Match to Query 44654: 1485.846168 from(743.930360,2+) rtinseconds(2956) index(38942)

Title: Locus:1.1.1.2277.42

Data file 2011-11-12 - TFD - EP 6-6.mgf

Click mouse within plot area to zoom in by factor of two about that point

Or, Plot from  to  Da

Label all possible matches  Label matches used for scoring

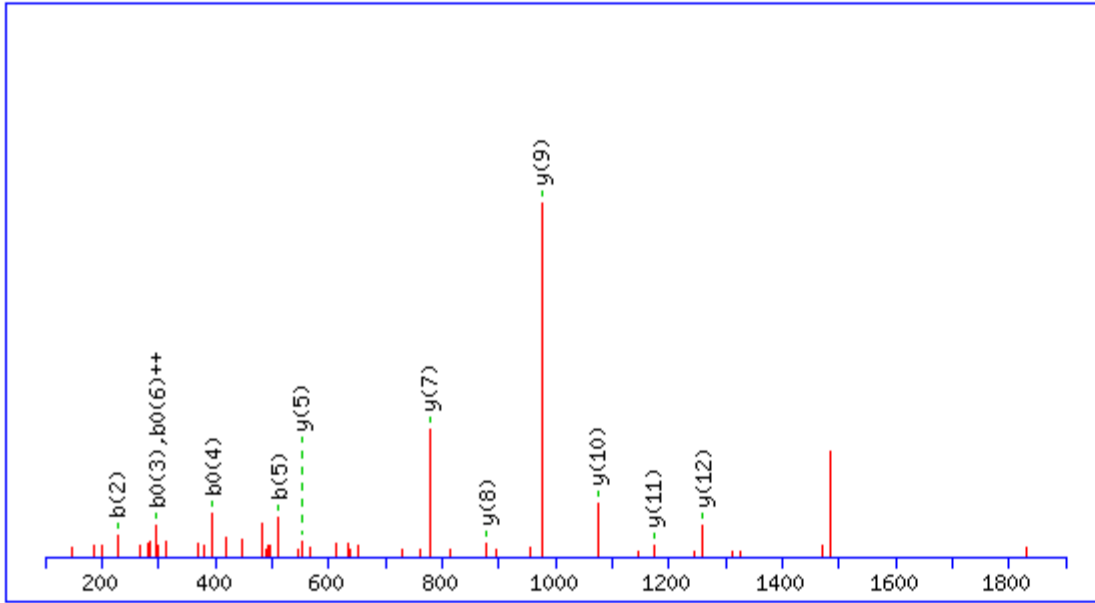

Monoisotopic mass of neutral peptide Mr(calc): 1485.844284

Fixed modifications: Propionamide (C) (apply to specified residues or termini only)

Ions Score: 66 Expect: 1.1e-006

Matches : 12/122 fragment ions using 13 most intense peaks [\(help\)](#)

| #  | b                 | b <sup>++</sup> | b <sup>0</sup>    | b <sup>0++</sup>  | Seq. | y                  | y <sup>++</sup> | y <sup>*</sup> | y <sup>*++</sup> | y <sup>0</sup> | y <sup>0++</sup> | #  |
|----|-------------------|-----------------|-------------------|-------------------|------|--------------------|-----------------|----------------|------------------|----------------|------------------|----|
| 1  | 114.091340        | 57.549308       |                   |                   | L    |                    |                 |                |                  |                |                  | 14 |
| 2  | <b>227.175404</b> | 114.091340      |                   |                   | L    | 1373.767494        | 687.387385      | 1356.740945    | 678.874111       | 1355.756929    | 678.382103       | 13 |
| 3  | 314.207432        | 157.607354      | <b>296.196867</b> | 148.602071        | S    | <b>1260.683430</b> | 630.845353      | 1243.656881    | 622.332079       | 1242.672865    | 621.840071       | 12 |
| 4  | 413.275846        | 207.141561      | <b>395.265281</b> | 198.136279        | V    | <b>1173.651402</b> | 587.329339      | 1156.624853    | 578.816065       | 1155.640837    | 578.324057       | 11 |
| 5  | <b>512.344260</b> | 256.675768      | 494.333695        | 247.670486        | V    | <b>1074.582988</b> | 537.795132      | 1057.556439    | 529.281858       | 1056.572423    | 528.789850       | 10 |
| 6  | 609.397024        | 305.202150      | 591.386459        | <b>296.196868</b> | P    | <b>975.514574</b>  | 488.260925      | 958.488025     | 479.747651       | 957.504009     | 479.255643       | 9  |
| 7  | 708.465438        | 354.736357      | 690.454873        | 345.731075        | V    | <b>878.461810</b>  | 439.734543      | 861.435261     | 431.221269       | 860.451245     | 430.729261       | 8  |
| 8  | 805.518202        | 403.262739      | 787.507637        | 394.257457        | P    | <b>779.393396</b>  | 390.200336      | 762.366847     | 381.687062       | 761.382831     | 381.195054       | 7  |
| 9  | 934.560795        | 467.784036      | 916.550230        | 458.778753        | E    | 682.340632         | 341.673954      | 665.314083     | 333.160680       | 664.330067     | 332.668672       | 6  |
| 10 | 991.582259        | 496.294768      | 973.571694        | 487.289485        | G    | <b>553.298039</b>  | 277.152658      | 536.271490     | 268.639383       | 535.287474     | 268.147375       | 5  |
| 11 | 1154.645588       | 577.826432      | 1136.635023       | 568.821150        | Y    | 496.276575         | 248.641926      | 479.250026     | 240.128651       | 478.266010     | 239.636643       | 4  |
| 12 | 1241.677616       | 621.342446      | 1223.667051       | 612.337164        | S    | 333.213246         | 167.110261      | 316.186697     | 158.596987       | 315.202681     | 158.104979       | 3  |
| 13 | 1340.746030       | 670.876653      | 1322.735465       | 661.871371        | V    | 246.181218         | 123.594247      | 229.154669     | 115.080973       |                |                  | 2  |
| 14 |                   |                 |                   |                   | K    | 147.112804         | 74.060040       | 130.086255     | 65.546765        |                |                  | 1  |

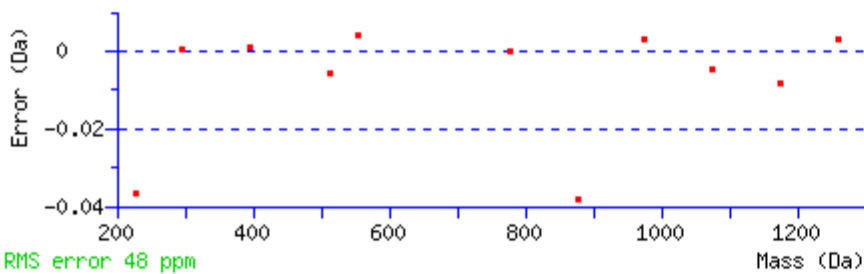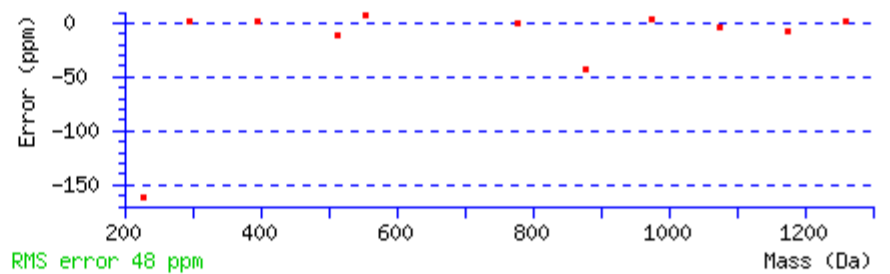

NCBI BLAST search of [LLSVVPVPEGYSVK](#)

(Parameters: blastp, nr protein database, expect=20000, no filter, PAM30)

Other BLAST [web gateways](#)

## All matches to this query

| Score | Mr(calc):   | Delta    | Sequence                       |
|-------|-------------|----------|--------------------------------|
| 66.2  | 1485.844284 | 0.001884 | <a href="#">LLSVVPVPEGYSVK</a> |

Mascot: <http://www.matrixscience.com/>

**Peptide View**

MS/MS Fragmentation of **SSELLGQAAR**

Found in **CJ032\_HUMAN**, UPF0693 protein C10orf32 OS=Homo sapiens GN=C10orf32 PE=1 SV=1

Match to Query 17931: 1030.543048 from(516.278800,2+) rtinseconds(1535) index(9152)

Title: Locus:1.1.1.1939.28

Data file 2011-11-14 - TFD - EP 8-7.mgf

Click mouse within plot area to zoom in by factor of two about that point

Or, Plot from  to  Da

Label all possible matches  Label matches used for scoring

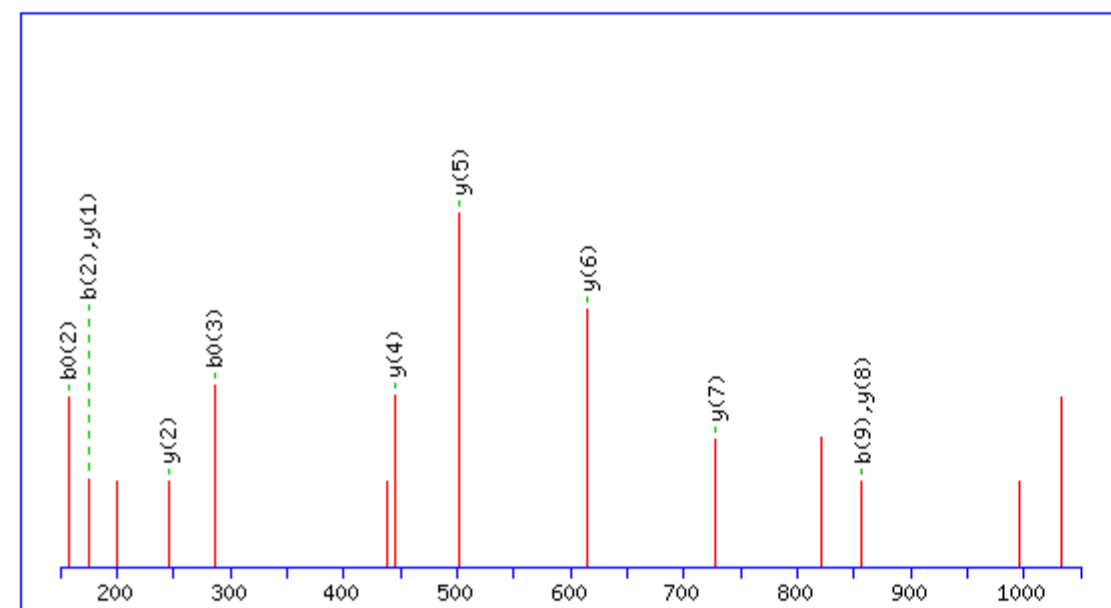

Monoisotopic mass of neutral peptide Mr(calc): 1030.540695

Fixed modifications: Propionamide (C) (apply to specified residues or termini only)

Ions Score: 66 Expect: 3.5e-006

Matches : 11/82 fragment ions using 13 most intense peaks ([help](#))

| #  | b                 | b <sup>++</sup> | b <sup>*</sup> | b <sup>*++</sup> | b <sup>0</sup>    | b <sup>0++</sup> | Seq. | y                 | y <sup>++</sup> | y <sup>*</sup> | y <sup>*++</sup> | y <sup>0</sup> | y <sup>0++</sup> | #  |
|----|-------------------|-----------------|----------------|------------------|-------------------|------------------|------|-------------------|-----------------|----------------|------------------|----------------|------------------|----|
| 1  | 88.039304         | 44.523290       |                |                  | 70.028739         | 35.518008        | S    |                   |                 |                |                  |                |                  | 10 |
| 2  | <b>175.071332</b> | 88.039304       |                |                  | <b>157.060767</b> | 79.034021        | S    | 944.515971        | 472.761624      | 927.489422     | 464.248349       | 926.505406     | 463.756341       | 9  |
| 3  | 304.113925        | 152.560600      |                |                  | <b>286.103360</b> | 143.555318       | E    | <b>857.483943</b> | 429.245610      | 840.457394     | 420.732335       | 839.473378     | 420.240327       | 8  |
| 4  | 417.197989        | 209.102633      |                |                  | 399.187424        | 200.097350       | L    | <b>728.441350</b> | 364.724313      | 711.414801     | 356.211039       |                |                  | 7  |
| 5  | 530.282053        | 265.644665      |                |                  | 512.271488        | 256.639382       | L    | <b>615.357286</b> | 308.182281      | 598.330737     | 299.669007       |                |                  | 6  |
| 6  | 587.303517        | 294.155397      |                |                  | 569.292952        | 285.150114       | G    | <b>502.273222</b> | 251.640249      | 485.246673     | 243.126975       |                |                  | 5  |
| 7  | 715.362095        | 358.184686      | 698.335546     | 349.671411       | 697.351530        | 349.179403       | Q    | <b>445.251758</b> | 223.129517      | 428.225209     | 214.616243       |                |                  | 4  |
| 8  | 786.399209        | 393.703243      | 769.372660     | 385.189968       | 768.388644        | 384.697960       | A    | 317.193180        | 159.100228      | 300.166631     | 150.586953       |                |                  | 3  |
| 9  | <b>857.436323</b> | 429.221800      | 840.409774     | 420.708525       | 839.425758        | 420.216517       | A    | <b>246.156066</b> | 123.581671      | 229.129517     | 115.068397       |                |                  | 2  |
| 10 |                   |                 |                |                  |                   |                  | R    | <b>175.118952</b> | 88.063114       | 158.092403     | 79.549840        |                |                  | 1  |

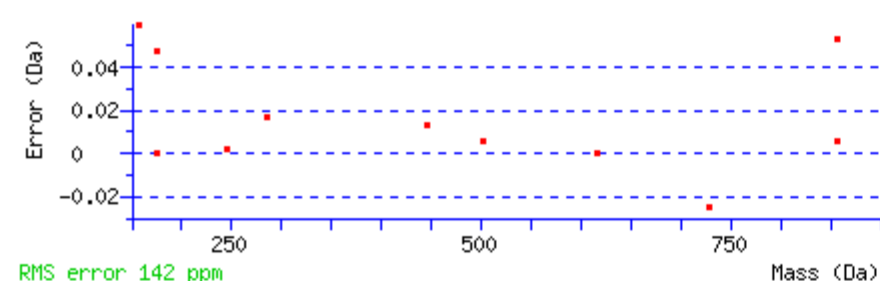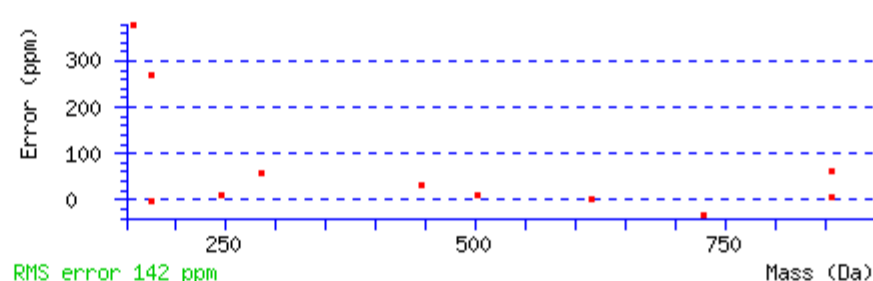

NCBI BLAST search of [SSELLGQAAR](#)

(Parameters: blastp, nr protein database, expect=20000, no filter, PAM30)

Other BLAST [web gateways](#)

**All matches to this query**

| Score | Mr(calc):   | Delta     | Sequence                   |
|-------|-------------|-----------|----------------------------|
| 65.7  | 1030.540695 | 0.002353  | <a href="#">SSELLGQAAR</a> |
| 18.6  | 1030.540695 | 0.002353  | <a href="#">SSAEVIAQAR</a> |
| 15.3  | 1030.534180 | 0.008868  | <a href="#">RPMLAAAGGR</a> |
| 13.9  | 1030.544739 | -0.001691 | <a href="#">RFLPPEPK</a>   |
| 11.7  | 1030.534180 | 0.008868  | <a href="#">RMIDVQNR</a>   |
| 11.4  | 1030.540695 | 0.002353  | <a href="#">ELTRDLER</a>   |
| 8.1   | 1030.551926 | -0.008878 | <a href="#">AELTATNRR</a>  |
| 6.7   | 1030.540695 | 0.002353  | <a href="#">LSKEAPGSAR</a> |
| 6.5   | 1030.545410 | -0.002362 | <a href="#">RPVRASCR</a>   |
| 3.0   | 1030.534180 | 0.008868  | <a href="#">CVGQIERR</a>   |

# MASCOT SCIENCE Mascot Search Results

## Peptide View

MS/MS Fragmentation of **VATYWSGVGLTGSR**

Found in **NUD14\_HUMAN**, Uridine diphosphate glucose pyrophosphatase OS=Homo sapiens GN=NUDT14 PE=1 SV=2

Match to Query 43203: 1452.726828 from(727.370690,2+) rtinseconds(2776) index(35721)

Title: Locus:1.1.1.2371.40

Data file 2011-11-10 - TFD - EP 4-5.mgf

Click mouse within plot area to zoom in by factor of two about that point

Or, Plot from  to  Da

Label all possible matches  Label matches used for scoring

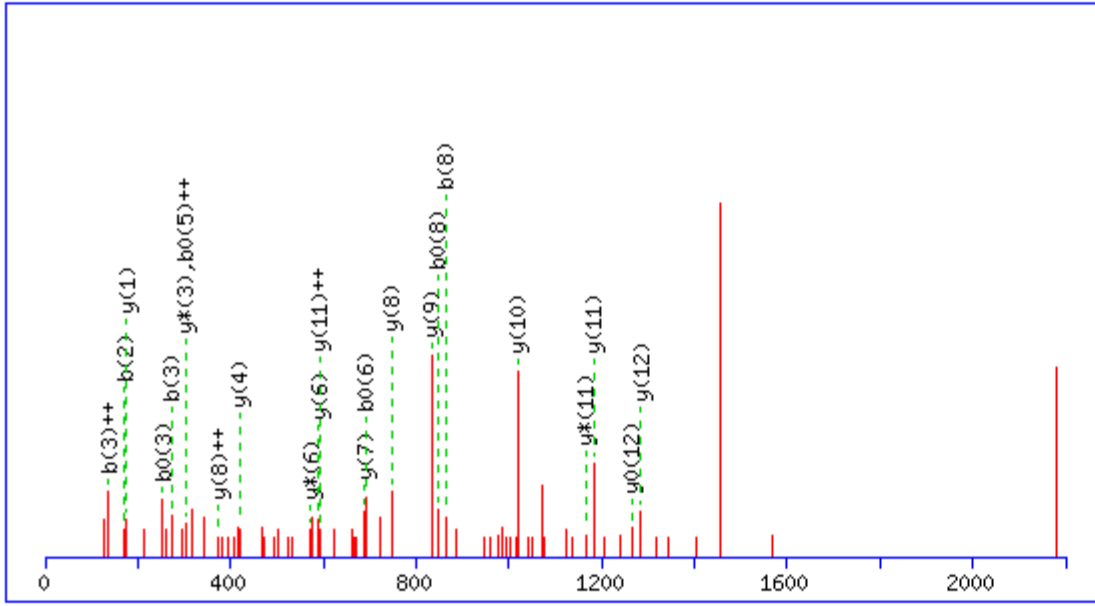

Monoisotopic mass of neutral peptide Mr(calc): 1452.736145

Fixed modifications: Propionamide (C) (apply to specified residues or termini only)

Ions Score: 43 Expect: 0.00055

Matches : 23/124 fragment ions using 47 most intense peaks [\(help\)](#)

| #  | b                 | b <sup>++</sup>   | b <sup>0</sup>    | b <sup>0++</sup>  | Seq. | y                  | y <sup>++</sup>   | y <sup>*</sup>     | y <sup>*++</sup> | y <sup>0</sup>     | y <sup>0++</sup> | #  |
|----|-------------------|-------------------|-------------------|-------------------|------|--------------------|-------------------|--------------------|------------------|--------------------|------------------|----|
| 1  | 100.075690        | 50.541483         |                   |                   | V    |                    |                   |                    |                  |                    |                  | 14 |
| 2  | <b>171.112804</b> | 86.060040         |                   |                   | A    | 1354.674992        | 677.841134        | 1337.648443        | 669.327860       | 1336.664427        | 668.835851       | 13 |
| 3  | <b>272.160483</b> | <b>136.583879</b> | <b>254.149918</b> | 127.578597        | T    | <b>1283.637878</b> | 642.322577        | 1266.611329        | 633.809303       | <b>1265.627313</b> | 633.317295       | 12 |
| 4  | 435.223812        | 218.115544        | 417.213247        | 209.110262        | Y    | <b>1182.590199</b> | <b>591.798738</b> | <b>1165.563650</b> | 583.285463       | 1164.579634        | 582.793455       | 11 |
| 5  | 621.303125        | 311.155201        | 603.292560        | <b>302.149918</b> | W    | <b>1019.526870</b> | 510.267073        | 1002.500321        | 501.753799       | 1001.516305        | 501.261791       | 10 |
| 6  | 708.335153        | 354.671215        | <b>690.324588</b> | 345.665932        | S    | <b>833.447557</b>  | 417.227417        | 816.421008         | 408.714142       | 815.436992         | 408.222134       | 9  |
| 7  | 765.356617        | 383.181947        | 747.346052        | 374.176664        | G    | <b>746.415529</b>  | <b>373.711403</b> | 729.388980         | 365.198128       | 728.404964         | 364.706120       | 8  |
| 8  | <b>864.425031</b> | 432.716154        | <b>846.414466</b> | 423.710871        | V    | <b>689.394065</b>  | 345.200671        | 672.367516         | 336.687396       | 671.383500         | 336.195388       | 7  |
| 9  | 921.446495        | 461.226886        | 903.435930        | 452.221603        | G    | <b>590.325651</b>  | 295.666464        | <b>573.299102</b>  | 287.153189       | 572.315086         | 286.661181       | 6  |
| 10 | 1034.530559       | 517.768918        | 1016.519994       | 508.763635        | L    | 533.304187         | 267.155732        | 516.277638         | 258.642457       | 515.293622         | 258.150449       | 5  |
| 11 | 1135.578238       | 568.292757        | 1117.567673       | 559.287475        | T    | <b>420.220123</b>  | 210.613699        | 403.193574         | 202.100425       | 402.209558         | 201.608417       | 4  |
| 12 | 1192.599702       | 596.803489        | 1174.589137       | 587.798206        | G    | 319.172444         | 160.089860        | <b>302.145895</b>  | 151.576585       | 301.161879         | 151.084577       | 3  |
| 13 | 1279.631730       | 640.319503        | 1261.621165       | 631.314221        | S    | 262.150980         | 131.579128        | 245.124431         | 123.065854       | 244.140415         | 122.573846       | 2  |
| 14 |                   |                   |                   |                   | R    | <b>175.118952</b>  | 88.063114         | 158.092403         | 79.549839        |                    |                  | 1  |

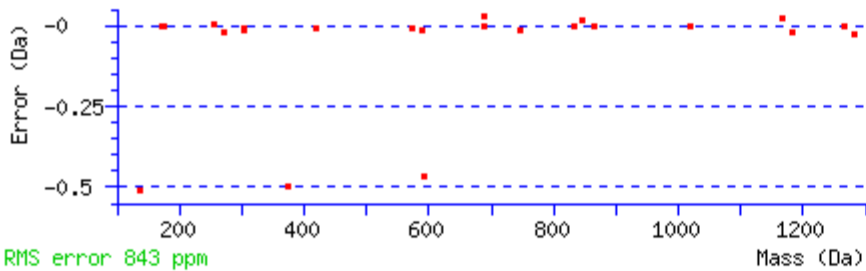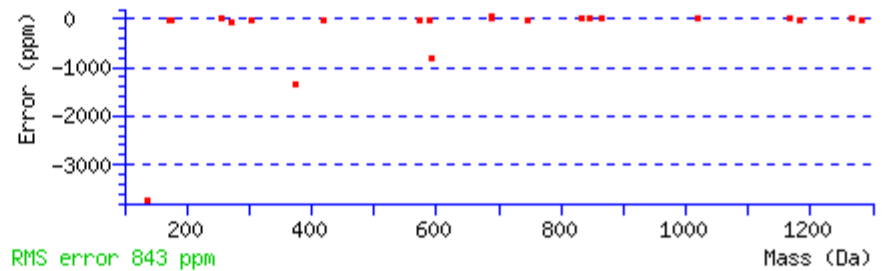

NCBI BLAST search of [VATYWSGVGLTGSR](#)

(Parameters: blastp, nr protein database, expect=20000, no filter, PAM30)

Other BLAST [web gateways](#)

All matches to this query

| Score | Mr(calc):   | Delta     | Sequence                       |
|-------|-------------|-----------|--------------------------------|
| 43.3  | 1452.736145 | -0.009317 | <a href="#">VATYWSGVGLTGSR</a> |

Mascot: <http://www.matrixscience.com/>

# MASCOT SCIENCE Mascot Search Results

## Peptide View

MS/MS Fragmentation of **ASLALLQR**

Found in **VPS29\_HUMAN**, Vacuolar protein sorting-associated protein 29 OS=Homo sapiens GN=VPS29 PE=1 SV=1

Match to Query 4464: 870.524448 from(436.269500,2+) rtinseconds(2165) index(26342)

Title: Locus:1.1.1.1214.5

Data file 2012-01-27 - TFD - Epitel - IEC - 10ul - 1.mgf

Click mouse within plot area to zoom in by factor of two about that point

Or, Plot from  to  Da

Label all possible matches  Label matches used for scoring

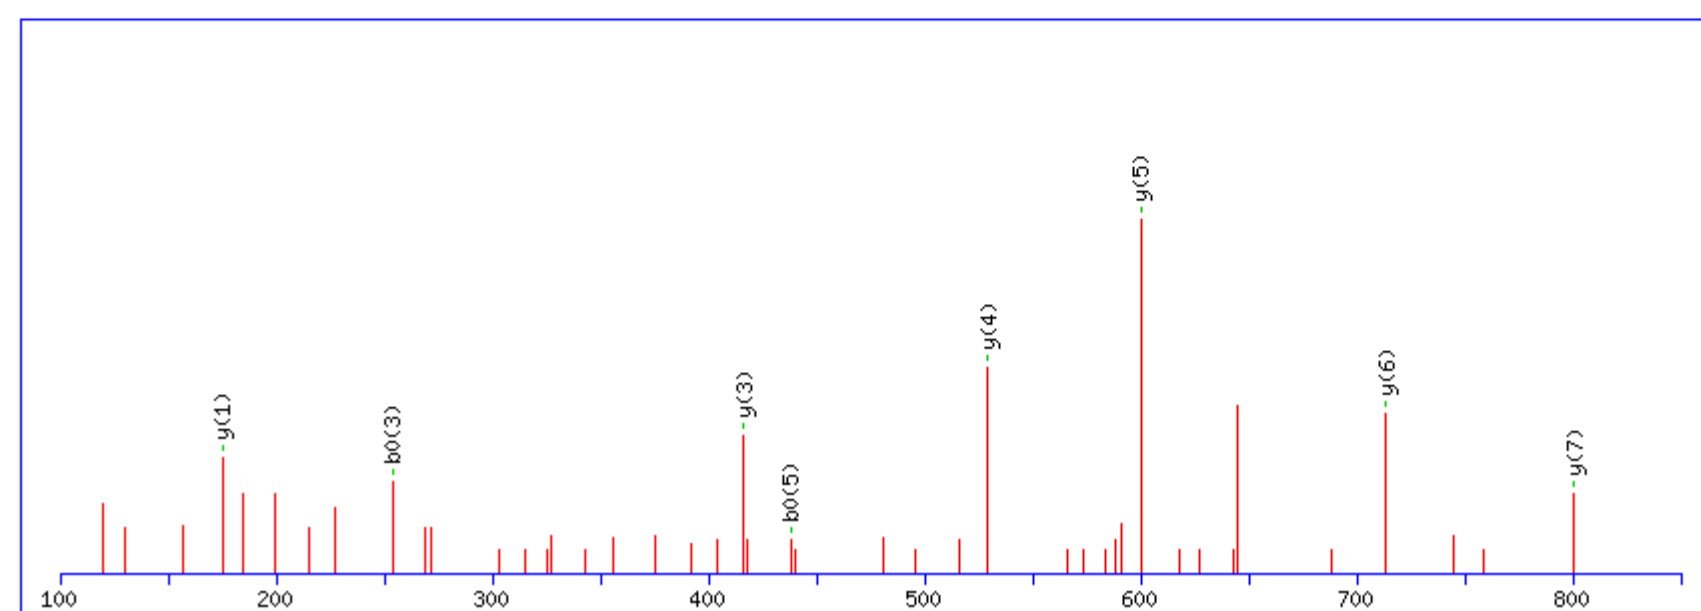

Monoisotopic mass of neutral peptide Mr(calc): 870.528671

Fixed modifications: Carbamidomethyl (C) (apply to specified residues or termini only)

Ions Score: 39 Expect: 0.0018

Matches : 8/58 fragment ions using 14 most intense peaks [\(help\)](#)

| # | b          | b <sup>++</sup> | b <sup>*</sup> | b <sup>***</sup> | b <sup>0</sup>    | b <sup>0++</sup> | Seq. | y                 | y <sup>++</sup> | y <sup>*</sup> | y <sup>***</sup> | y <sup>0</sup> | y <sup>0++</sup> | # |
|---|------------|-----------------|----------------|------------------|-------------------|------------------|------|-------------------|-----------------|----------------|------------------|----------------|------------------|---|
| 1 | 72.044390  | 36.525833       |                |                  |                   |                  | A    |                   |                 |                |                  |                |                  | 8 |
| 2 | 159.076418 | 80.041847       |                |                  | 141.065853        | 71.036564        | S    | <b>800.498864</b> | 400.753070      | 783.472315     | 392.239796       | 782.488299     | 391.747788       | 7 |
| 3 | 272.160482 | 136.583879      |                |                  | <b>254.149917</b> | 127.578597       | L    | <b>713.466836</b> | 357.237056      | 696.440287     | 348.723782       |                |                  | 6 |
| 4 | 343.197596 | 172.102436      |                |                  | 325.187031        | 163.097154       | A    | <b>600.382772</b> | 300.695024      | 583.356223     | 292.181750       |                |                  | 5 |
| 5 | 456.281660 | 228.644468      |                |                  | <b>438.271095</b> | 219.639186       | L    | <b>529.345658</b> | 265.176467      | 512.319109     | 256.663193       |                |                  | 4 |
| 6 | 569.365724 | 285.186500      |                |                  | 551.355159        | 276.181218       | L    | <b>416.261594</b> | 208.634435      | 399.235045     | 200.121160       |                |                  | 3 |
| 7 | 697.424302 | 349.215789      | 680.397753     | 340.702515       | 679.413737        | 340.210507       | Q    | 303.177530        | 152.092403      | 286.150981     | 143.579128       |                |                  | 2 |
| 8 |            |                 |                |                  |                   |                  | R    | <b>175.118952</b> | 88.063114       | 158.092403     | 79.549839        |                |                  | 1 |

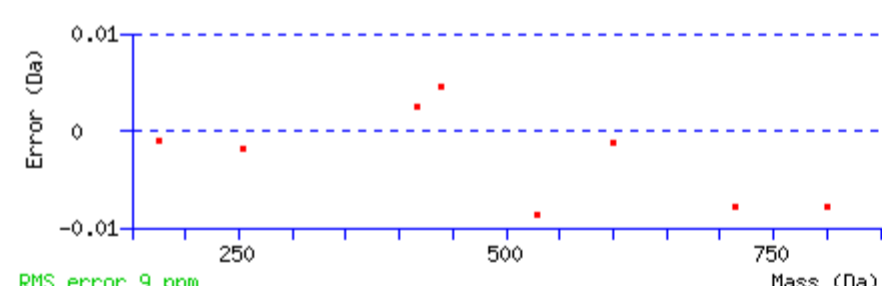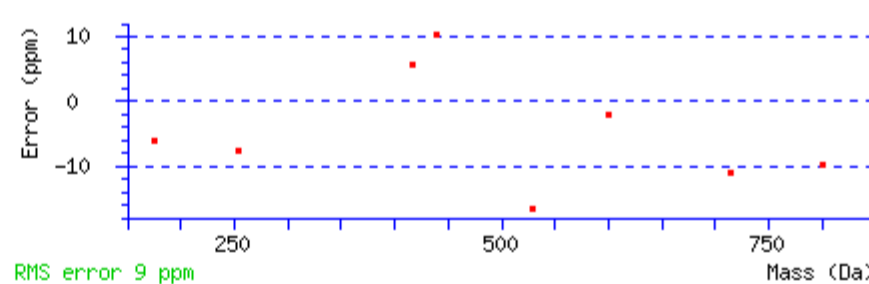

NCBI BLAST search of **ASLALLQR**

(Parameters: blastp, nr protein database, expect=20000, no filter, PAM30)

Other BLAST [web gateways](#)

All matches to this query

| Score | Mr(calc):  | Delta     | Sequence                 |
|-------|------------|-----------|--------------------------|
| 39.4  | 870.528671 | -0.004223 | <a href="#">ASLALLQR</a> |
| 24.5  | 870.528671 | -0.004223 | <a href="#">ASAIHQ</a>   |
| 12.5  | 870.528671 | -0.004223 | <a href="#">ALSQALR</a>  |
| 9.7   | 870.528687 | -0.004239 | <a href="#">AAVVDKIR</a> |
| 9.7   | 870.528671 | -0.004223 | <a href="#">ALLSALQR</a> |
| 9.7   | 870.528687 | -0.004239 | <a href="#">AVEGVLKR</a> |
| 8.9   | 870.528671 | -0.004223 | <a href="#">LLENVKR</a>  |
| 8.2   | 870.517441 | 0.007007  | <a href="#">LLEELVR</a>  |
| 7.3   | 870.528671 | -0.004223 | <a href="#">LNDLIKR</a>  |
| 5.9   | 870.517441 | 0.007007  | <a href="#">LLEIVER</a>  |

Mascot: <http://www.matrixscience.com/>

# Mascot Search Results

## Peptide View

MS/MS Fragmentation of **NFVEETVYLLSR**

Found in **VPS41\_HUMAN**, Vacuolar protein sorting-associated protein 41 homolog OS=Homo sapiens GN=VPS41 PE=1 SV=3

Match to Query 46986: 1468.766228 from(735.390390,2+) rtinseconds(4359) index(64333)

Title: Locus:1.1.1.3068.9

Data file 2011-11-14 - TFD - EP 8-2.mgf

Click mouse within plot area to zoom in by factor of two about that point

Or, Plot from  to  Da

Label all possible matches  Label matches used for scoring

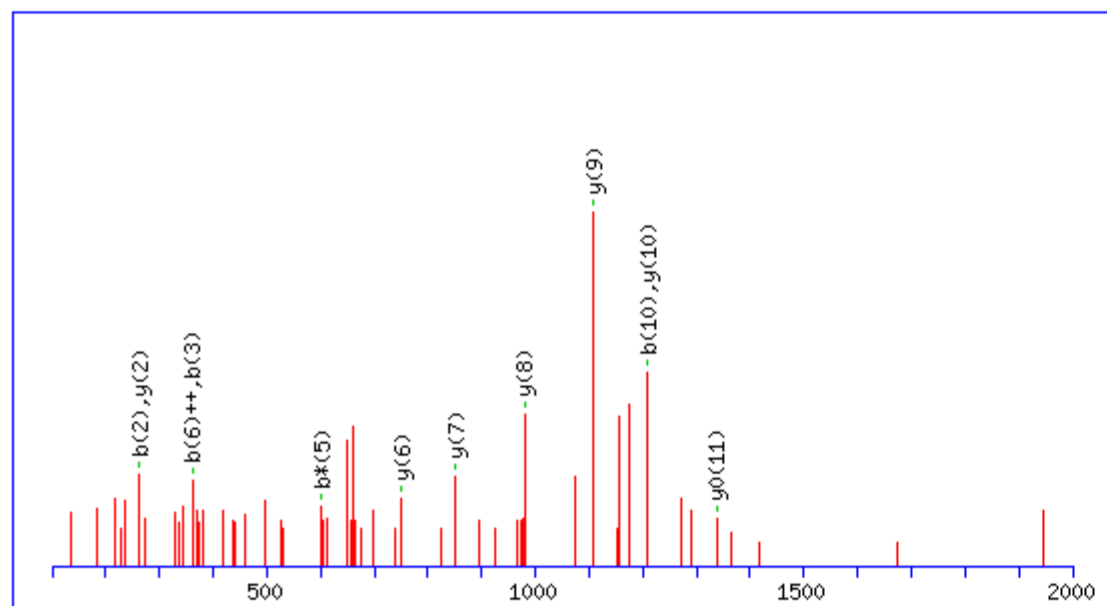

Monoisotopic mass of neutral peptide Mr(calc): 1468.756180

Fixed modifications: Propionamide (C) (apply to specified residues or termini only)

Ions Score: 40 Expect: 0.0011

Matches : 12/124 fragment ions using 13 most intense peaks [\(help\)](#)

| #  | b                  | b <sup>++</sup>   | b <sup>*</sup>    | b <sup>+++</sup> | b <sup>0</sup> | b <sup>0++</sup> | Seq. | y                  | y <sup>++</sup> | y <sup>*</sup> | y <sup>+++</sup> | y <sup>0</sup>     | y <sup>0++</sup> | #  |
|----|--------------------|-------------------|-------------------|------------------|----------------|------------------|------|--------------------|-----------------|----------------|------------------|--------------------|------------------|----|
| 1  | 115.050203         | 58.028740         | 98.023654         | 49.515465        |                |                  | N    |                    |                 |                |                  |                    |                  | 12 |
| 2  | <b>262.118617</b>  | 131.562946        | 245.092068        | 123.049672       |                |                  | F    | 1355.720544        | 678.363910      | 1338.693995    | 669.850636       | <b>1337.709979</b> | 669.358628       | 11 |
| 3  | <b>361.187031</b>  | 181.097153        | 344.160482        | 172.583879       |                |                  | V    | <b>1208.652130</b> | 604.829703      | 1191.625581    | 596.316429       | 1190.641565        | 595.824420       | 10 |
| 4  | 490.229624         | 245.618450        | 473.203075        | 237.105176       | 472.219059     | 236.613168       | E    | <b>1109.583716</b> | 555.295496      | 1092.557167    | 546.782221       | 1091.573151        | 546.290213       | 9  |
| 5  | 619.272217         | 310.139747        | <b>602.245668</b> | 301.626472       | 601.261652     | 301.134464       | E    | <b>980.541123</b>  | 490.774200      | 963.514574     | 482.260925       | 962.530558         | 481.768917       | 8  |
| 6  | 720.319896         | <b>360.663586</b> | 703.293347        | 352.150312       | 702.309331     | 351.658304       | T    | <b>851.498530</b>  | 426.252903      | 834.471981     | 417.739628       | 833.487965         | 417.247620       | 7  |
| 7  | 819.388310         | 410.197793        | 802.361761        | 401.684519       | 801.377745     | 401.192511       | V    | <b>750.450851</b>  | 375.729064      | 733.424302     | 367.215789       | 732.440286         | 366.723781       | 6  |
| 8  | 982.451639         | 491.729458        | 965.425090        | 483.216183       | 964.441074     | 482.724175       | Y    | 651.382437         | 326.194857      | 634.355888     | 317.681582       | 633.371872         | 317.189574       | 5  |
| 9  | 1095.535703        | 548.271490        | 1078.509154       | 539.758215       | 1077.525138    | 539.266207       | L    | 488.319108         | 244.663192      | 471.292559     | 236.149917       | 470.308543         | 235.657909       | 4  |
| 10 | <b>1208.619767</b> | 604.813521        | 1191.593218       | 596.300247       | 1190.609202    | 595.808239       | L    | 375.235044         | 188.121160      | 358.208495     | 179.607885       | 357.224479         | 179.115877       | 3  |
| 11 | 1295.651795        | 648.329536        | 1278.625246       | 639.816261       | 1277.641230    | 639.324253       | S    | <b>262.150980</b>  | 131.579128      | 245.124431     | 123.065854       | 244.140415         | 122.573846       | 2  |
| 12 |                    |                   |                   |                  |                |                  | R    | 175.118952         | 88.063114       | 158.092403     | 79.549839        |                    |                  | 1  |

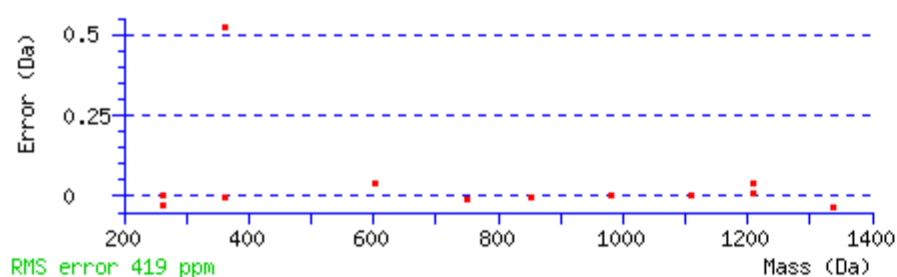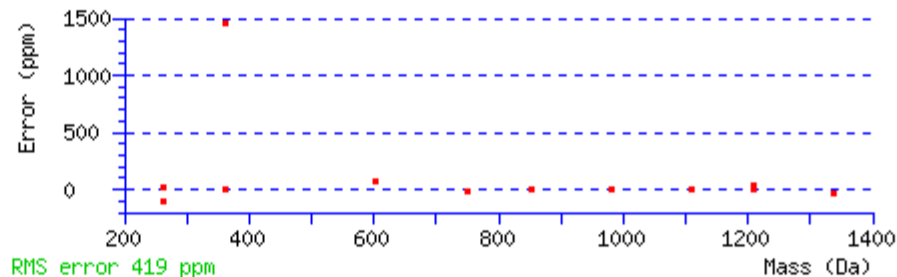

NCBI BLAST search of **NFVEETVYLLSR**

(Parameters: blastp, nr protein database, expect=20000, no filter, PAM30)

Other BLAST [web gateways](#)

All matches to this query

| Score | Mr(calc):   | Delta    | Sequence                     |
|-------|-------------|----------|------------------------------|
| 40.3  | 1468.756180 | 0.010048 | <a href="#">NFVEETVYLLSR</a> |

Mascot: <http://www.matrixscience.com/>

# MASCOT SEARCH RESULTS

## Peptide View

MS/MS Fragmentation of **TEVPPLLLILDR**

Found in **VPS45\_HUMAN**, Vacuolar protein sorting-associated protein 45 OS=Homo sapiens GN=VPS45 PE=1 SV=1

Match to Query 37428: 1377.829468 from(689.922010,2+) rtinseconds(4394) index(67622)

Title: Locus:1.1.1.3222.18

Data file 2011-11-13 - TFD - EP 7-3.mgf

Click mouse within plot area to zoom in by factor of two about that point

Or, Plot from  to  Da

Label all possible matches  Label matches used for scoring

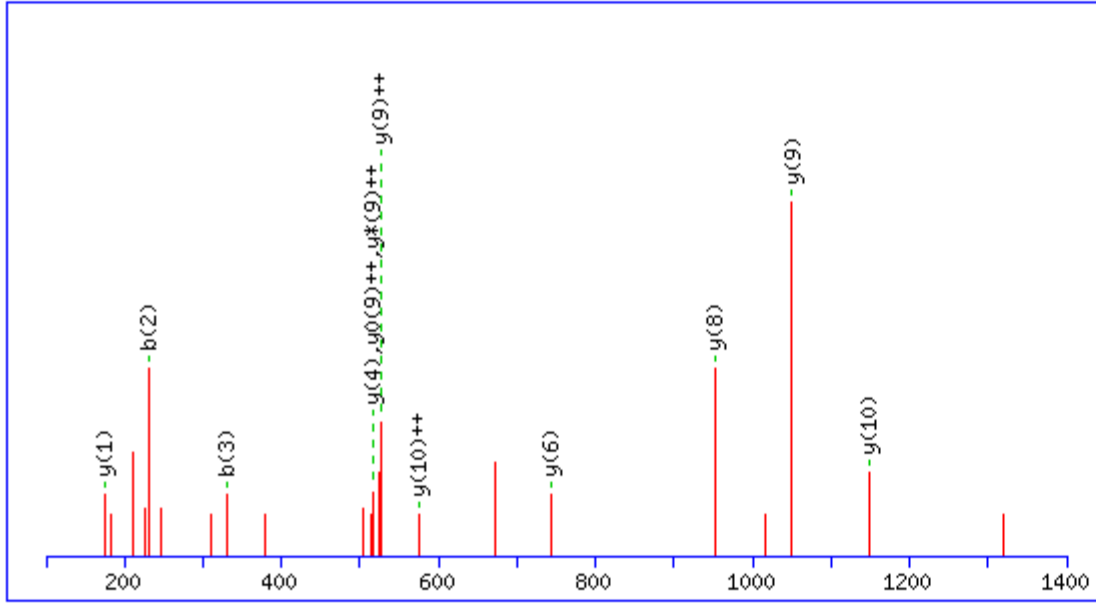

Monoisotopic mass of neutral peptide  $M_r(\text{calc})$ : 1377.823135

Fixed modifications: Propionamide (C) (apply to specified residues or termini only)

Ions Score: 44 Expect: 4.4e-005

Matches : 12/108 fragment ions using 17 most intense peaks [\(help\)](#)

| #  | b                 | b <sup>++</sup> | b <sup>0</sup> | b <sup>0++</sup> | Seq. | y                  | y <sup>++</sup>   | y <sup>*</sup> | y <sup>*++</sup>  | y <sup>0</sup> | y <sup>0++</sup>  | #  |
|----|-------------------|-----------------|----------------|------------------|------|--------------------|-------------------|----------------|-------------------|----------------|-------------------|----|
| 1  | 102.054955        | 51.531116       | 84.044390      | 42.525833        | T    |                    |                   |                |                   |                |                   | 12 |
| 2  | <b>231.097548</b> | 116.052412      | 213.086983     | 107.047130       | E    | 1277.782750        | 639.395013        | 1260.756201    | 630.881739        | 1259.772185    | 630.389731        | 11 |
| 3  | <b>330.165962</b> | 165.586619      | 312.155397     | 156.581337       | V    | <b>1148.740157</b> | <b>574.873717</b> | 1131.713608    | 566.360442        | 1130.729592    | 565.868434        | 10 |
| 4  | 427.218726        | 214.113001      | 409.208161     | 205.107719       | P    | <b>1049.671743</b> | <b>525.339510</b> | 1032.645194    | <b>516.826235</b> | 1031.661178    | <b>516.334227</b> | 9  |
| 5  | 524.271490        | 262.639383      | 506.260925     | 253.634101       | P    | <b>952.618979</b>  | 476.813128        | 935.592430     | 468.299853        | 934.608414     | 467.807845        | 8  |
| 6  | 637.355554        | 319.181415      | 619.344989     | 310.176133       | L    | 855.566215         | 428.286746        | 838.539666     | 419.773471        | 837.555650     | 419.281463        | 7  |
| 7  | 750.439618        | 375.723447      | 732.429053     | 366.718165       | L    | <b>742.482151</b>  | 371.744714        | 725.455602     | 363.231439        | 724.471586     | 362.739431        | 6  |
| 8  | 863.523682        | 432.265479      | 845.513117     | 423.260197       | L    | 629.398087         | 315.202682        | 612.371538     | 306.689407        | 611.387522     | 306.197399        | 5  |
| 9  | 976.607746        | 488.807511      | 958.597181     | 479.802229       | I    | <b>516.314023</b>  | 258.660650        | 499.287474     | 250.147375        | 498.303458     | 249.655367        | 4  |
| 10 | 1089.691810       | 545.349543      | 1071.681245    | 536.344261       | L    | 403.229959         | 202.118617        | 386.203410     | 193.605343        | 385.219394     | 193.113335        | 3  |
| 11 | 1204.718753       | 602.863015      | 1186.708188    | 593.857732       | D    | 290.145895         | 145.576585        | 273.119346     | 137.063311        | 272.135330     | 136.571303        | 2  |
| 12 |                   |                 |                |                  | R    | <b>175.118952</b>  | 88.063114         | 158.092403     | 79.549839         |                |                   | 1  |

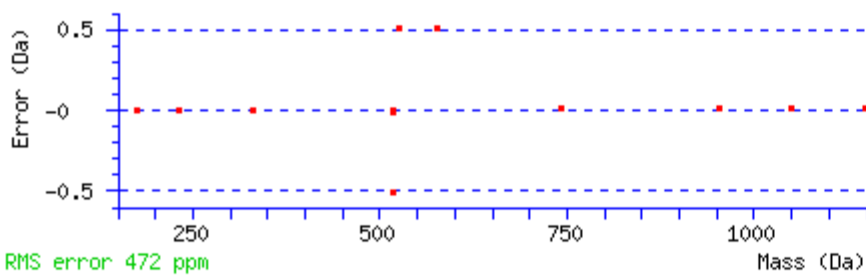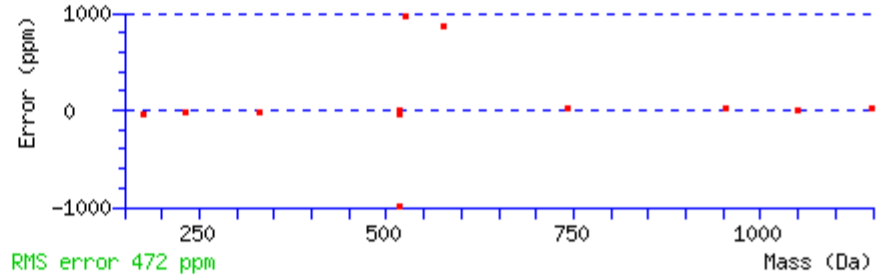

NCBI BLAST search of [TEVPPLLLILDR](#)

(Parameters: blastp, nr protein database, expect=20000, no filter, PAM30)

Other BLAST [web gateways](#)

All matches to this query

| Score | $M_r(\text{calc})$ : | Delta    | Sequence                     |
|-------|----------------------|----------|------------------------------|
| 43.6  | 1377.823135          | 0.006333 | <a href="#">TEVPPLLLILDR</a> |

Mascot: <http://www.matrixscience.com/>

# MASCOT SCIENCE Mascot Search Results

## Peptide View

MS/MS Fragmentation of **IFTEDLPEVESLPR**

Found in **VPS39\_HUMAN**, Vam6/Vps39-like protein OS=Homo sapiens GN=VPS39 PE=1 SV=2

Match to Query 50837: 1643.842188 from(822.928370,2+) rtinseconds(3196) index(41488)

Title: Locus:1.1.1.2852.41

Data file 2011-11-12 - TFD - EP 5-2.mgf

Click mouse within plot area to zoom in by factor of two about that point

Or, Plot from  to  Da

Label all possible matches  Label matches used for scoring

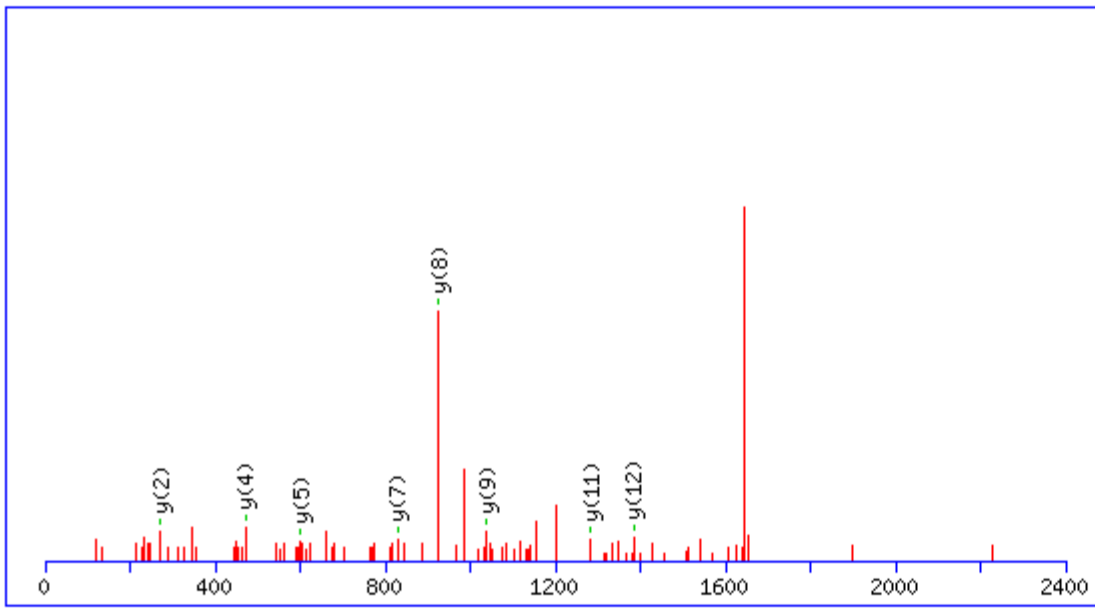

Monoisotopic mass of neutral peptide Mr(calc): 1643.840637

Fixed modifications: Propionamide (C) (apply to specified residues or termini only)

Ions Score: 52 Expect: 8.4e-005

Matches : 8/120 fragment ions using 16 most intense peaks [\(help\)](#)

| #  | b           | b <sup>++</sup> | b <sup>0</sup> | b <sup>0++</sup> | Seq. | y                  | y <sup>++</sup> | y <sup>*</sup> | y <sup>*++</sup> | y <sup>0</sup> | y <sup>0++</sup> | #  |
|----|-------------|-----------------|----------------|------------------|------|--------------------|-----------------|----------------|------------------|----------------|------------------|----|
| 1  | 114.091340  | 57.549308       |                |                  | I    |                    |                 |                |                  |                |                  | 14 |
| 2  | 261.159754  | 131.083515      |                |                  | F    | 1531.763865        | 766.385571      | 1514.737316    | 757.872296       | 1513.753300    | 757.380288       | 13 |
| 3  | 362.207433  | 181.607354      | 344.196868     | 172.602072       | T    | <b>1384.695451</b> | 692.851364      | 1367.668902    | 684.338089       | 1366.684886    | 683.846081       | 12 |
| 4  | 491.250026  | 246.128651      | 473.239461     | 237.123369       | E    | <b>1283.647772</b> | 642.327524      | 1266.621223    | 633.814250       | 1265.637207    | 633.322242       | 11 |
| 5  | 606.276969  | 303.642123      | 588.266404     | 294.636840       | D    | 1154.605179        | 577.806227      | 1137.578630    | 569.292953       | 1136.594614    | 568.800945       | 10 |
| 6  | 719.361033  | 360.184155      | 701.350468     | 351.178872       | L    | <b>1039.578236</b> | 520.292756      | 1022.551687    | 511.779482       | 1021.567671    | 511.287474       | 9  |
| 7  | 816.413797  | 408.710537      | 798.403232     | 399.705254       | P    | <b>926.494172</b>  | 463.750724      | 909.467623     | 455.237450       | 908.483607     | 454.745442       | 8  |
| 8  | 945.456390  | 473.231833      | 927.445825     | 464.226551       | E    | <b>829.441408</b>  | 415.224342      | 812.414859     | 406.711068       | 811.430843     | 406.219060       | 7  |
| 9  | 1044.524804 | 522.766040      | 1026.514239    | 513.760758       | V    | 700.398815         | 350.703046      | 683.372266     | 342.189771       | 682.388250     | 341.697763       | 6  |
| 10 | 1173.567397 | 587.287337      | 1155.556832    | 578.282054       | E    | <b>601.330401</b>  | 301.168838      | 584.303852     | 292.655564       | 583.319836     | 292.163556       | 5  |
| 11 | 1260.599425 | 630.803351      | 1242.588860    | 621.798068       | S    | <b>472.287808</b>  | 236.647542      | 455.261259     | 228.134267       | 454.277243     | 227.642259       | 4  |
| 12 | 1373.683489 | 687.345383      | 1355.672924    | 678.340100       | L    | 385.255780         | 193.131528      | 368.229231     | 184.618253       |                |                  | 3  |
| 13 | 1470.736253 | 735.871765      | 1452.725688    | 726.866482       | P    | <b>272.171716</b>  | 136.589496      | 255.145167     | 128.076221       |                |                  | 2  |
| 14 |             |                 |                |                  | R    | 175.118952         | 88.063114       | 158.092403     | 79.549839        |                |                  | 1  |

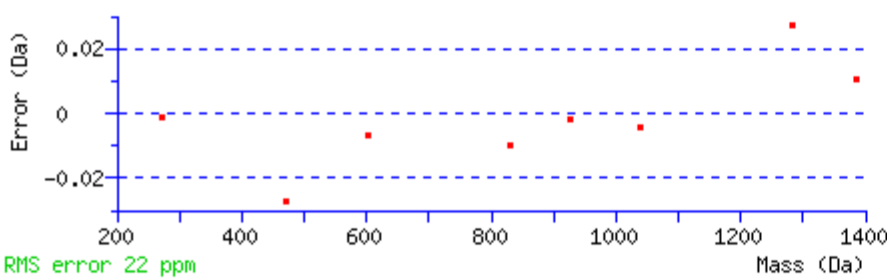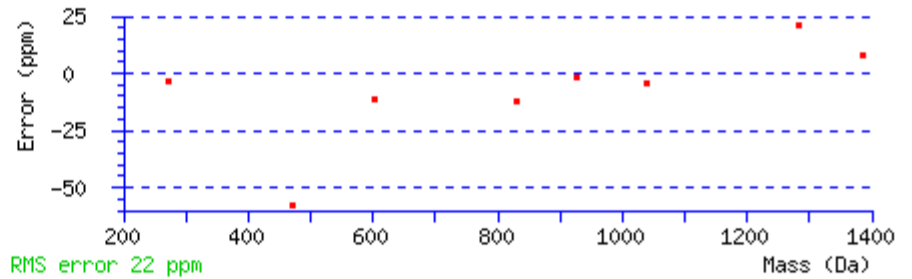

NCBI BLAST search of [IFTEDLPEVESLPR](#)

(Parameters: blastp, nr protein database, expect=20000, no filter, PAM30)

Other BLAST [web gateways](#)

## All matches to this query

| Score | Mr(calc):   | Delta    | Sequence                        |
|-------|-------------|----------|---------------------------------|
| 51.9  | 1643.840637 | 0.001551 | <a href="#">IFTEDLPEVESLPR</a>  |
| 11.7  | 1643.837448 | 0.004740 | <a href="#">VAAAESMPLLLECAR</a> |

Mascot: <http://www.matrixscience.com/>



# **MATRIX** SCIENCE Mascot Search Results

## Peptide View

MS/MS Fragmentation of **VPLEPGPK**

Found in **VASN\_HUMAN**, Vasorin OS=Homo sapiens GN=VASN PE=1 SV=1

Match to Query 4416: 851.479888 from(426.747220,2+) rtinseconds(1899) index(20675)

Title: Locus:1.1.1.2067.6

Data file 2011-11-10 - TFD - EP 3-4.mgf

Click mouse within plot area to zoom in by factor of two about that point

Or, Plot from  to  Da

Label all possible matches  Label matches used for scoring

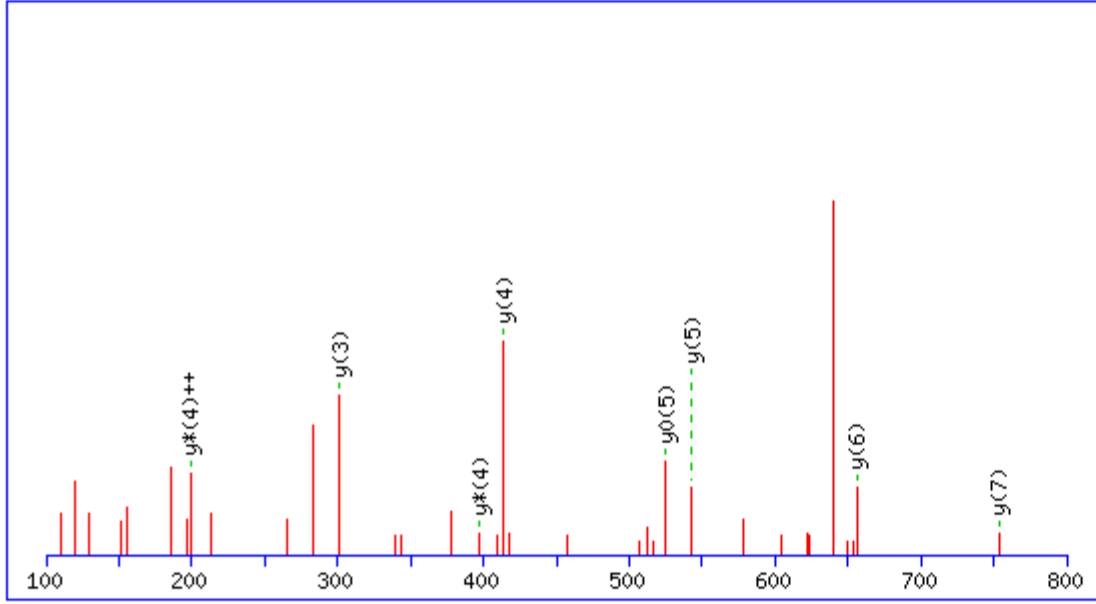

Monoisotopic mass of neutral peptide Mr(calc): 851.475266

Fixed modifications: Propionamide (C) (apply to specified residues or termini only)

Variable modifications:

P5 : Oxidation (P)

Ions Score: 38 Expect: 0.00087

Matches : 8/56 fragment ions using 13 most intense peaks [\(help\)](#)

| # | b          | b <sup>++</sup> | b <sup>0</sup> | b <sup>0++</sup> | Seq. | y          | y <sup>++</sup> | y <sup>*</sup> | y <sup>*++</sup> | y <sup>0</sup> | y <sup>0++</sup> | # |
|---|------------|-----------------|----------------|------------------|------|------------|-----------------|----------------|------------------|----------------|------------------|---|
| 1 | 100.075690 | 50.541483       |                |                  | V    |            |                 |                |                  |                |                  | 8 |
| 2 | 197.128454 | 99.067865       |                |                  | P    | 753.414132 | 377.210704      | 736.387583     | 368.697430       | 735.403567     | 368.205422       | 7 |
| 3 | 310.212518 | 155.609897      |                |                  | L    | 656.361368 | 328.684322      | 639.334819     | 320.171048       | 638.350803     | 319.679040       | 6 |
| 4 | 439.255111 | 220.131193      | 421.244546     | 211.125911       | E    | 543.277304 | 272.142290      | 526.250755     | 263.629016       | 525.266739     | 263.137008       | 5 |
| 5 | 552.302790 | 276.655033      | 534.292225     | 267.649751       | P    | 414.234711 | 207.620994      | 397.208162     | 199.107719       |                |                  | 4 |
| 6 | 609.324254 | 305.165765      | 591.313689     | 296.160483       | G    | 301.187032 | 151.097154      | 284.160483     | 142.583880       |                |                  | 3 |
| 7 | 706.377018 | 353.692147      | 688.366453     | 344.686865       | P    | 244.165568 | 122.586422      | 227.139019     | 114.073148       |                |                  | 2 |
| 8 |            |                 |                |                  | K    | 147.112804 | 74.060040       | 130.086255     | 65.546765        |                |                  | 1 |

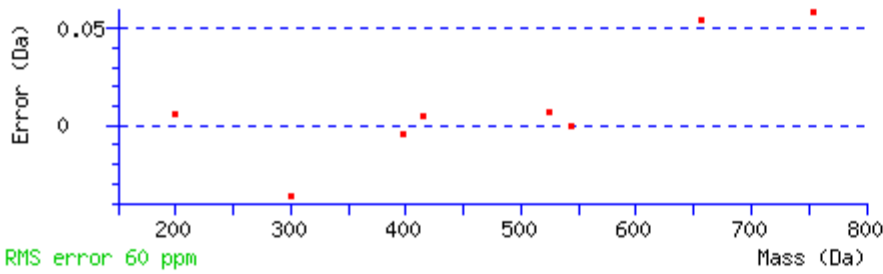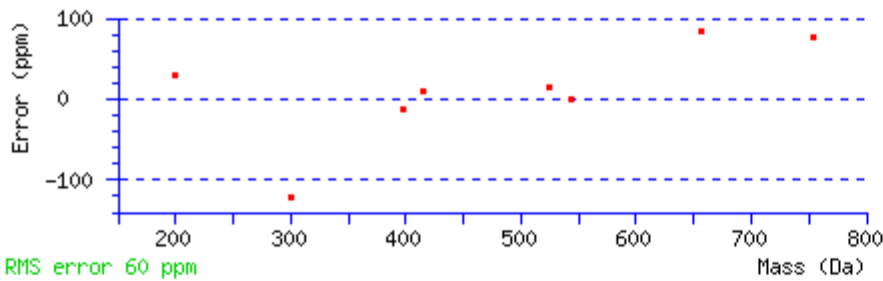

NCBI BLAST search of **VPLEPGPK**

(Parameters: blastp, nr protein database, expect=20000, no filter, PAM30)

Other BLAST [web gateways](#)

All matches to this query

| Score | Mr(calc):  | Delta     | Sequence                 |
|-------|------------|-----------|--------------------------|
| 37.9  | 851.475266 | 0.004622  | <a href="#">VPLEPGPK</a> |
| 23.6  | 851.475266 | 0.004622  | <a href="#">VPLEPGPK</a> |
| 13.6  | 851.486496 | -0.006608 | <a href="#">VLPAPAPR</a> |
| 12.8  | 851.475266 | 0.004622  | <a href="#">VPLEPGPK</a> |
| 11.7  | 851.486496 | -0.006608 | <a href="#">VLPAPAPR</a> |
| 9.5   | 851.486496 | -0.006608 | <a href="#">VPPPALSR</a> |
| 6.5   | 851.486496 | -0.006608 | <a href="#">VLPAPAPR</a> |
| 6.4   | 851.486496 | -0.006608 | <a href="#">VPPPALSR</a> |
| 3.5   | 851.486496 | -0.006608 | <a href="#">VLKHPDK</a>  |
| 1.3   | 851.475266 | 0.004622  | <a href="#">DPPIPAK</a>  |

**Peptide View**

MS/MS Fragmentation of **FQTTYGSR**

Found in **VAMP7\_HUMAN**, Vesicle-associated membrane protein 7 OS=Homo sapiens GN=VAMP7 PE=1 SV=3

Match to Query 13135: 958.455088 from(480.234820,2+) rtinseconds(1304) index(6534)

Title: Locus:1.1.1.1763.20

Data file 2011-11-10 - TFD - EP 3-6.mgf

Click mouse within plot area to zoom in by factor of two about that point

Or, Plot from  to  Da

Label all possible matches  Label matches used for scoring

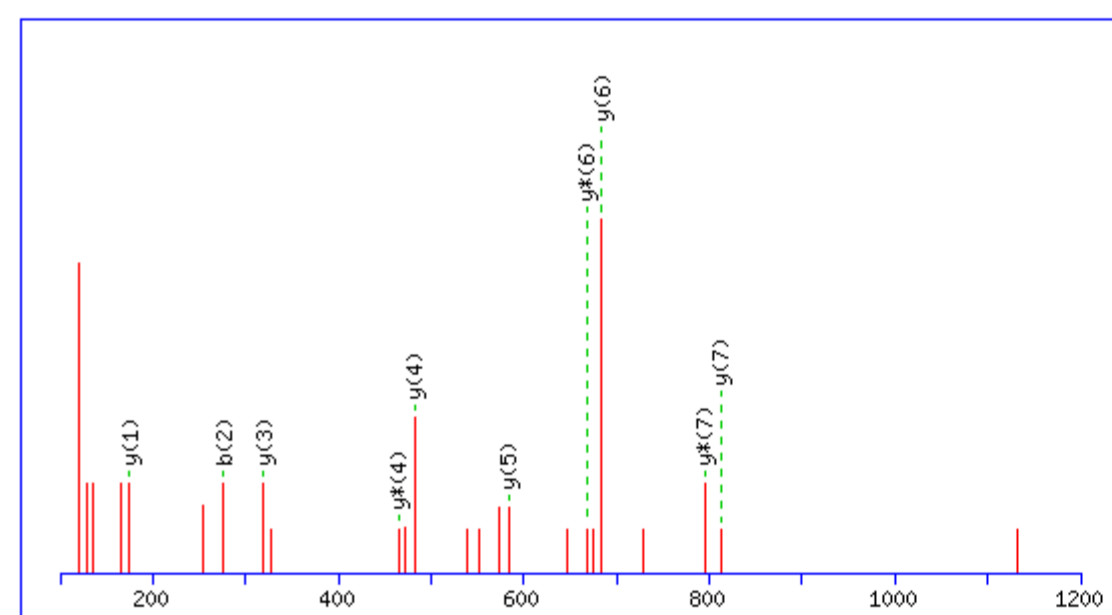

Monoisotopic mass of neutral peptide Mr(calc): 958.450851

Fixed modifications: Propionamide (C) (apply to specified residues or termini only)

Ions Score: 36 Expect: 0.0018

Matches : 10/76 fragment ions using 22 most intense peaks [\(help\)](#)

| # | b          | b <sup>++</sup> | b <sup>*</sup> | b <sup>*++</sup> | b <sup>0</sup> | b <sup>0++</sup> | Seq. | y          | y <sup>++</sup> | y <sup>*</sup> | y <sup>*++</sup> | y <sup>0</sup> | y <sup>0++</sup> | # |
|---|------------|-----------------|----------------|------------------|----------------|------------------|------|------------|-----------------|----------------|------------------|----------------|------------------|---|
| 1 | 148.075690 | 74.541483       |                |                  |                |                  | F    |            |                 |                |                  |                |                  | 8 |
| 2 | 276.134268 | 138.570772      | 259.107719     | 130.057497       |                |                  | Q    | 812.389709 | 406.698493      | 795.363160     | 398.185218       | 794.379144     | 397.693210       | 7 |
| 3 | 377.181947 | 189.094611      | 360.155398     | 180.581337       | 359.171382     | 180.089329       | T    | 684.331131 | 342.669204      | 667.304582     | 334.155929       | 666.320566     | 333.663921       | 6 |
| 4 | 478.229626 | 239.618451      | 461.203077     | 231.105177       | 460.219061     | 230.613169       | T    | 583.283452 | 292.145364      | 566.256903     | 283.632090       | 565.272887     | 283.140082       | 5 |
| 5 | 641.292955 | 321.150116      | 624.266406     | 312.636841       | 623.282390     | 312.144833       | Y    | 482.235773 | 241.621524      | 465.209224     | 233.108250       | 464.225208     | 232.616242       | 4 |
| 6 | 698.314419 | 349.660848      | 681.287870     | 341.147573       | 680.303854     | 340.655565       | G    | 319.172444 | 160.089860      | 302.145895     | 151.576585       | 301.161879     | 151.084577       | 3 |
| 7 | 785.346447 | 393.176862      | 768.319898     | 384.663587       | 767.335882     | 384.171579       | S    | 262.150980 | 131.579128      | 245.124431     | 123.065853       | 244.140415     | 122.573845       | 2 |
| 8 |            |                 |                |                  |                |                  | R    | 175.118952 | 88.063114       | 158.092403     | 79.549839        |                |                  | 1 |

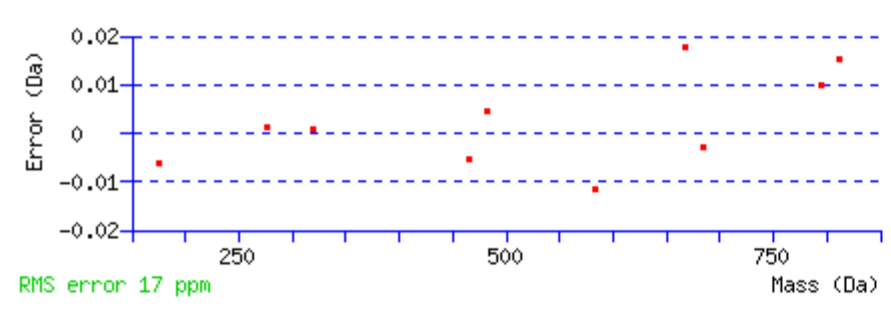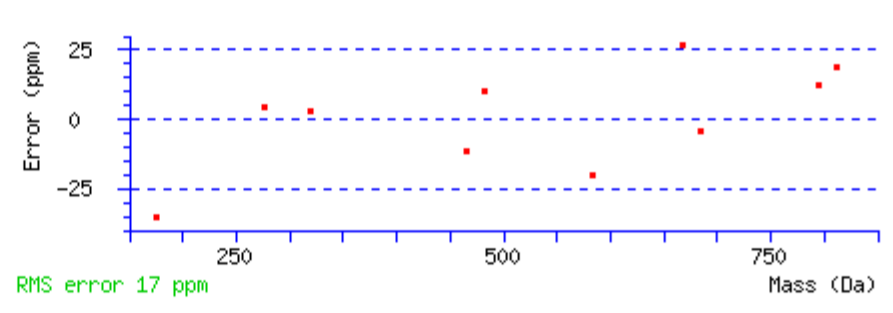

NCBI BLAST search of **FQTTYGSR**

(Parameters: blastp, nr protein database, expect=20000, no filter, PAM30)

Other BLAST [web gateways](#)

**All matches to this query**

| Score | Mr(calc):  | Delta    | Sequence                  |
|-------|------------|----------|---------------------------|
| 35.6  | 958.450851 | 0.004237 | <a href="#">FQTTYGSR</a>  |
| 6.2   | 958.454224 | 0.000864 | <a href="#">MPGPSPGLR</a> |
| 5.8   | 958.454208 | 0.000880 | <a href="#">MQGPIPER</a>  |
| 5.8   | 958.454208 | 0.000880 | <a href="#">MQGPIPER</a>  |
| 4.5   | 958.446808 | 0.008280 | <a href="#">EEGDPTR</a>   |

# MASCOT SCIENCE Mascot Search Results

## Peptide View

MS/MS Fragmentation of **GFGLLSIFGK**

Found in **VKORL\_HUMAN**, Vitamin K epoxide reductase complex subunit 1-like protein 1 OS=Homo sapiens GN=VKORC1L1 PE=1 SV=2

Match to Query 22630: 1094.608888 from(548.311720,2+) rtinseconds(4077) index(60836)

Title: Locus:1.1.1.2941.17

Data file 2011-11-14 - TFD - EP 8-1.mgf

Click mouse within plot area to zoom in by factor of two about that point

Or, Plot from  to  Da

Label all possible matches  Label matches used for scoring

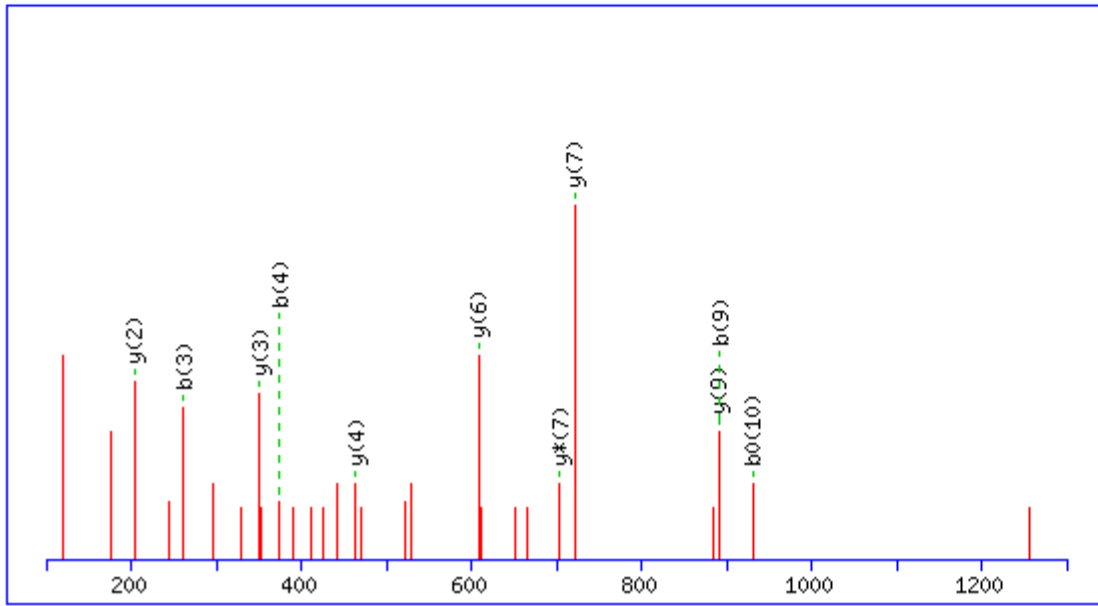

Monoisotopic mass of neutral peptide Mr(calc): 1094.612442

Fixed modifications: Propionamide (C) (apply to specified residues or termini only)

Ions Score: 48 Expect: 6.9e-005

Matches : 11/80 fragment ions using 16 most intense peaks [\(help\)](#)

| #  | b                 | b <sup>++</sup> | b <sup>0</sup>    | b <sup>0++</sup> | Seq.     | y                 | y <sup>++</sup> | y <sup>*</sup>    | y <sup>*++</sup> | y <sup>0</sup> | y <sup>0++</sup> | #  |
|----|-------------------|-----------------|-------------------|------------------|----------|-------------------|-----------------|-------------------|------------------|----------------|------------------|----|
| 1  | 58.028740         | 29.518008       |                   |                  | <b>G</b> |                   |                 |                   |                  |                |                  | 11 |
| 2  | 205.097154        | 103.052215      |                   |                  | <b>F</b> | 1038.598244       | 519.802760      | 1021.571695       | 511.289486       | 1020.587679    | 510.797478       | 10 |
| 3  | <b>262.118618</b> | 131.562947      |                   |                  | <b>G</b> | <b>891.529830</b> | 446.268553      | 874.503281        | 437.755278       | 873.519265     | 437.263270       | 9  |
| 4  | <b>375.202682</b> | 188.104979      |                   |                  | <b>L</b> | 834.508366        | 417.757821      | 817.481817        | 409.244547       | 816.497801     | 408.752539       | 8  |
| 5  | 488.286746        | 244.647011      |                   |                  | <b>L</b> | <b>721.424302</b> | 361.215789      | <b>704.397753</b> | 352.702514       | 703.413737     | 352.210506       | 7  |
| 6  | 545.308210        | 273.157743      |                   |                  | <b>G</b> | <b>608.340238</b> | 304.673757      | 591.313689        | 296.160483       | 590.329673     | 295.668475       | 6  |
| 7  | 632.340238        | 316.673757      | 614.329673        | 307.668475       | <b>S</b> | 551.318774        | 276.163025      | 534.292225        | 267.649750       | 533.308209     | 267.157742       | 5  |
| 8  | 745.424302        | 373.215789      | 727.413737        | 364.210507       | <b>I</b> | <b>464.286746</b> | 232.647011      | 447.260197        | 224.133736       |                |                  | 4  |
| 9  | <b>892.492716</b> | 446.749996      | 874.482151        | 437.744713       | <b>F</b> | <b>351.202682</b> | 176.104979      | 334.176133        | 167.591704       |                |                  | 3  |
| 10 | 949.514180        | 475.260728      | <b>931.503615</b> | 466.255446       | <b>G</b> | <b>204.134268</b> | 102.570772      | 187.107719        | 94.057497        |                |                  | 2  |
| 11 |                   |                 |                   |                  | <b>K</b> | 147.112804        | 74.060040       | 130.086255        | 65.546765        |                |                  | 1  |

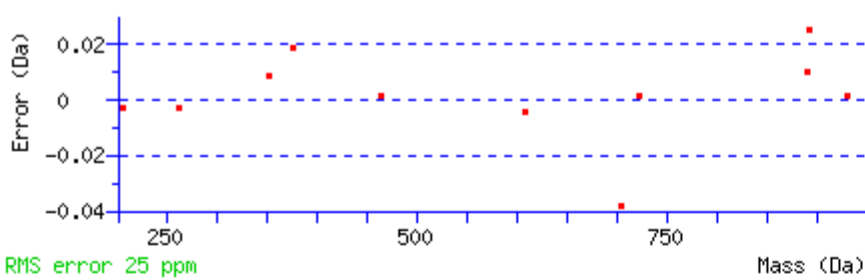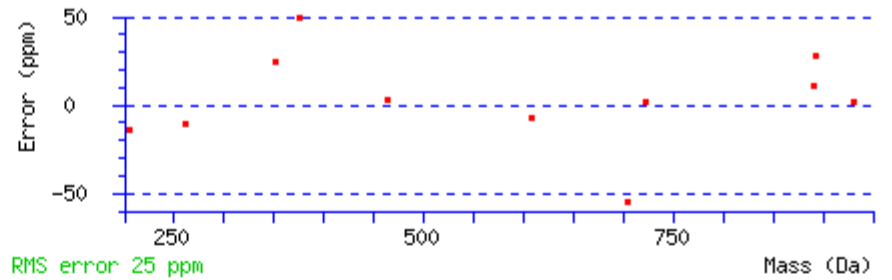

NCBI BLAST search of [GFGLLSIFGK](#)

(Parameters: blastp, nr protein database, expect=20000, no filter, PAM30)

Other BLAST [web gateways](#)

## All matches to this query

| Score | Mr(calc):   | Delta     | Sequence                   |
|-------|-------------|-----------|----------------------------|
| 47.7  | 1094.612442 | -0.003554 | <a href="#">GFGLLSIFGK</a> |
| 3.1   | 1094.598495 | 0.010393  | <a href="#">APRPWPSLR</a>  |
| 1.4   | 1094.608414 | 0.000474  | <a href="#">RVPDPSPVTK</a> |
| 1.0   | 1094.608383 | 0.000505  | <a href="#">EPKPVGLNNK</a> |

Mascot: <http://www.matrixscience.com/>

# **MATRIX** SCIENCE Mascot Search Results

## Peptide View

MS/MS Fragmentation of **GAEFLLR**

Found in **CCG6\_HUMAN**, Voltage-dependent calcium channel gamma-6 subunit OS=Homo sapiens GN=CACNG6 PE=2 SV=1

Match to Query 826: 804.446268 from(403.230410,2+) rtinseconds(2167) index(25297)

Title: Locus:1.1.1.2254.2

Data file 2011-11-14 - TFD - EP 8-2.mgf

Click mouse within plot area to zoom in by factor of two about that point

Or, Plot from  to  Da

Label all possible matches  Label matches used for scoring

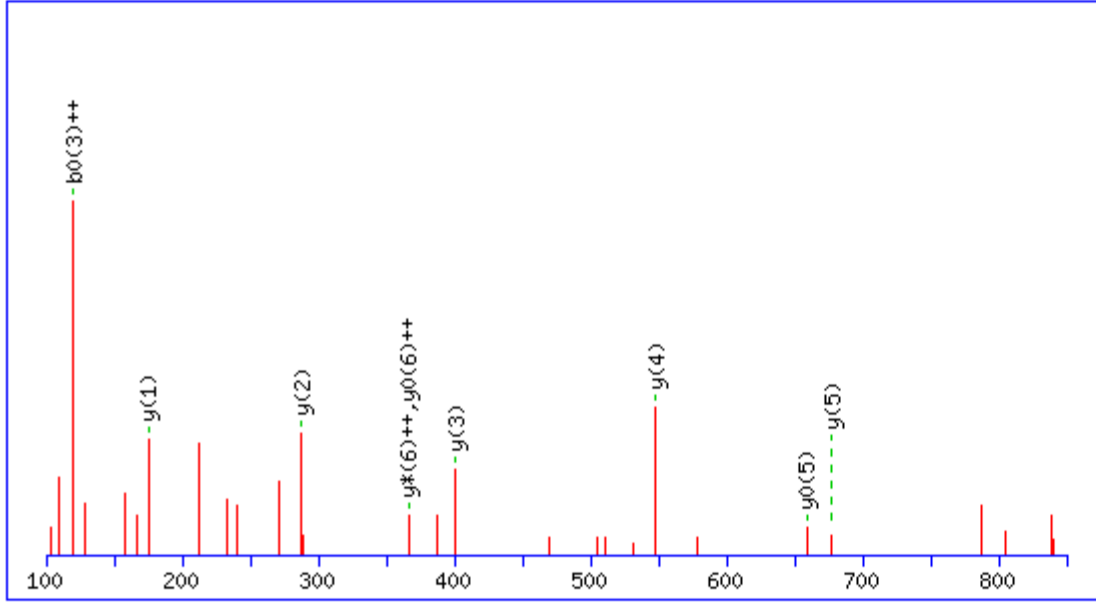

Monoisotopic mass of neutral peptide Mr(calc): 804.449371

Fixed modifications: Propionamide (C) (apply to specified residues or termini only)

Ions Score: 37 Expect: 0.0041

Matches : 9/48 fragment ions using 12 most intense peaks [\(help\)](#)

| # | b          | b <sup>++</sup> | b <sup>0</sup> | b <sup>0++</sup>  | Seq.     | y                 | y <sup>++</sup> | y <sup>*</sup> | y <sup>*++</sup>  | y <sup>0</sup>    | y <sup>0++</sup>  | # |
|---|------------|-----------------|----------------|-------------------|----------|-------------------|-----------------|----------------|-------------------|-------------------|-------------------|---|
| 1 | 58.028740  | 29.518008       |                |                   | <b>G</b> |                   |                 |                |                   |                   |                   | 7 |
| 2 | 129.065854 | 65.036565       |                |                   | <b>A</b> | 748.435201        | 374.721239      | 731.408652     | <b>366.207964</b> | 730.424636        | <b>365.715956</b> | 6 |
| 3 | 258.108447 | 129.557862      | 240.097882     | <b>120.552579</b> | <b>E</b> | <b>677.398087</b> | 339.202682      | 660.371538     | 330.689407        | <b>659.387522</b> | 330.197399        | 5 |
| 4 | 405.176861 | 203.092068      | 387.166296     | 194.086786        | <b>F</b> | <b>548.355494</b> | 274.681385      | 531.328945     | 266.168111        |                   |                   | 4 |
| 5 | 518.260925 | 259.634101      | 500.250360     | 250.628818        | <b>L</b> | <b>401.287080</b> | 201.147178      | 384.260531     | 192.633904        |                   |                   | 3 |
| 6 | 631.344989 | 316.176133      | 613.334424     | 307.170850        | <b>L</b> | <b>288.203016</b> | 144.605146      | 271.176467     | 136.091872        |                   |                   | 2 |
| 7 |            |                 |                |                   | <b>R</b> | <b>175.118952</b> | 88.063114       | 158.092403     | 79.549840         |                   |                   | 1 |

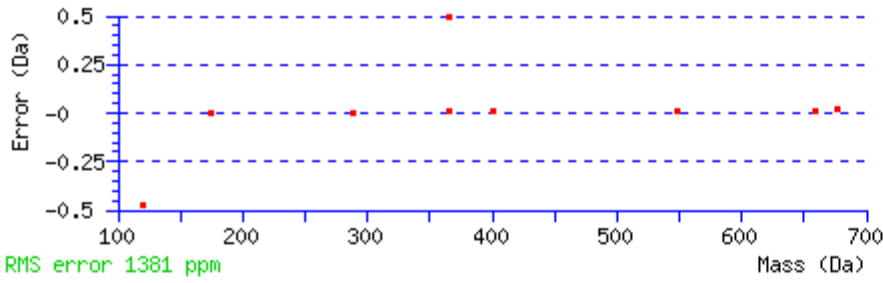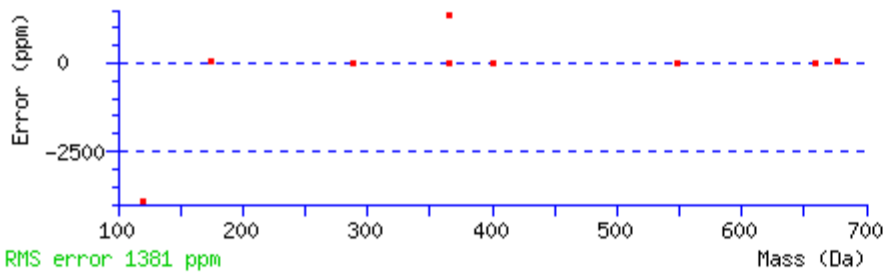

NCBI BLAST search of [GAEFLLR](#)

(Parameters: blastp, nr protein database, expect=20000, no filter, PAM30)

Other BLAST [web gateways](#)

## All matches to this query

| Score | Mr(calc):  | Delta     | Sequence                |
|-------|------------|-----------|-------------------------|
| 37.4  | 804.449371 | -0.003103 | <a href="#">GAEFLLR</a> |
| 34.4  | 804.449371 | -0.003103 | <a href="#">QEFLLR</a>  |
| 9.8   | 804.452728 | -0.006460 | <a href="#">EMKILR</a>  |
| 9.8   | 804.452728 | -0.006460 | <a href="#">EMKLLR</a>  |
| 9.8   | 804.452744 | -0.006476 | <a href="#">MALSVLR</a> |
| 9.1   | 804.452728 | -0.006460 | <a href="#">KLMELR</a>  |
| 8.6   | 804.449356 | -0.003088 | <a href="#">KYLEPR</a>  |
| 7.9   | 804.452728 | -0.006460 | <a href="#">MEKLLR</a>  |
| 7.9   | 804.452728 | -0.006460 | <a href="#">MKELLR</a>  |
| 7.9   | 804.449387 | -0.003119 | <a href="#">VFASPLR</a> |

# **MASCOT** Mascot Search Results

## Peptide View

MS/MS Fragmentation of **DKITELR**

Found in **VSIG4\_HUMAN**, V-set and immunoglobulin domain-containing protein 4 OS=Homo sapiens GN=VSIG4 PE=1 SV=1

Match to Query 4649: 873.483328 from(437.748940,2+) rtinseconds(1602) index(15592)

Title: Locus:1.1.1.999.5

Data file 2012-01-27 - TFD - Epitel - IEC - 10ul - 1.mgf

Click mouse within plot area to zoom in by factor of two about that point

Or, Plot from  to  Da

Label all possible matches  Label matches used for scoring

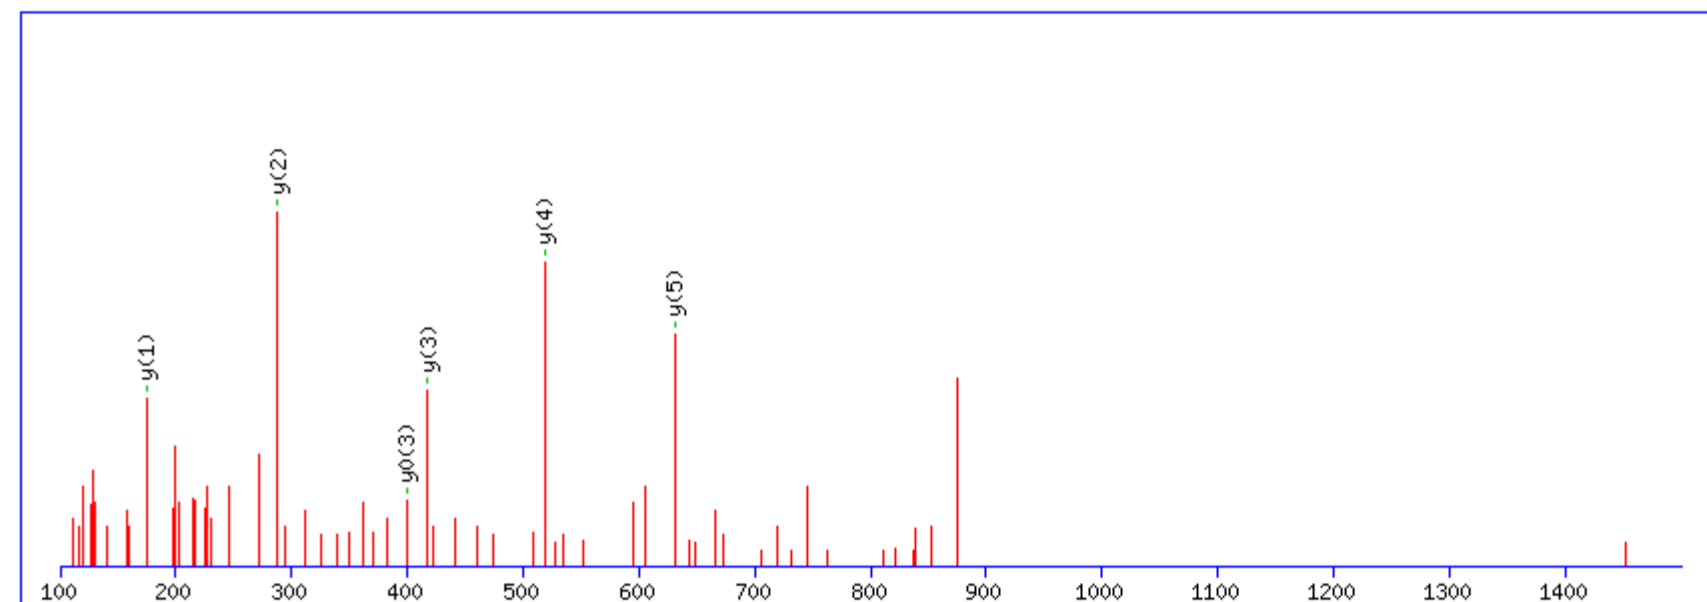

Monoisotopic mass of neutral peptide Mr(calc): 873.491959

Fixed modifications: Carbamidomethyl (C) (apply to specified residues or termini only)

Ions Score: 42 Expect: 0.0011

Matches : 6/66 fragment ions using 8 most intense peaks ([help](#))

| # | b          | b <sup>++</sup> | b <sup>*</sup> | b <sup>+++</sup> | b <sup>0</sup> | b <sup>0++</sup> | Seq. | y                 | y <sup>++</sup> | y <sup>*</sup> | y <sup>+++</sup> | y <sup>0</sup>    | y <sup>0++</sup> | # |
|---|------------|-----------------|----------------|------------------|----------------|------------------|------|-------------------|-----------------|----------------|------------------|-------------------|------------------|---|
| 1 | 116.034219 | 58.520748       |                |                  | 98.023654      | 49.515465        | D    |                   |                 |                |                  |                   |                  | 7 |
| 2 | 244.129182 | 122.568229      | 227.102633     | 114.054955       | 226.118617     | 113.562947       | K    | 759.472315        | 380.239796      | 742.445766     | 371.726521       | 741.461750        | 371.234513       | 6 |
| 3 | 357.213246 | 179.110261      | 340.186697     | 170.596987       | 339.202681     | 170.104979       | I    | <b>631.377352</b> | 316.192314      | 614.350803     | 307.679040       | 613.366787        | 307.187032       | 5 |
| 4 | 458.260925 | 229.634101      | 441.234376     | 221.120826       | 440.250360     | 220.628818       | T    | <b>518.293288</b> | 259.650282      | 501.266739     | 251.137008       | 500.282723        | 250.645000       | 4 |
| 5 | 587.303518 | 294.155397      | 570.276969     | 285.642123       | 569.292953     | 285.150115       | E    | <b>417.245609</b> | 209.126443      | 400.219060     | 200.613168       | <b>399.235044</b> | 200.121160       | 3 |
| 6 | 700.387582 | 350.697429      | 683.361033     | 342.184155       | 682.377017     | 341.692147       | L    | <b>288.203016</b> | 144.605146      | 271.176467     | 136.091872       |                   |                  | 2 |
| 7 |            |                 |                |                  |                |                  | R    | <b>175.118952</b> | 88.063114       | 158.092403     | 79.549840        |                   |                  | 1 |

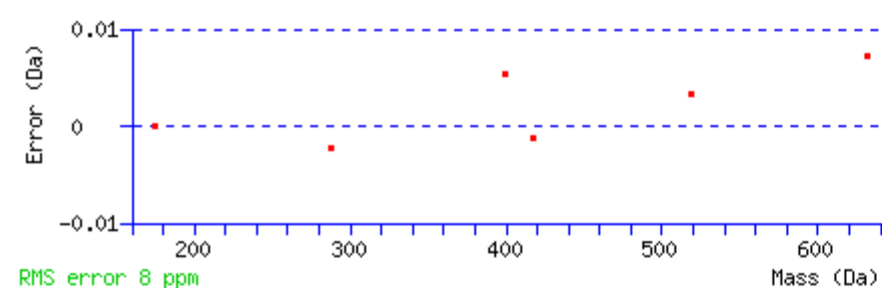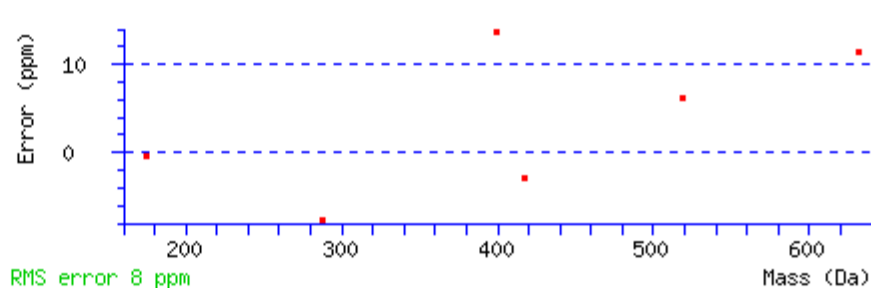

NCBI BLAST search of [DKITELR](#)

(Parameters: blastp, nr protein database, expect=20000, no filter, PAM30)

Other BLAST [web gateways](#)

## All matches to this query

| Score | Mr(calc):  | Delta     | Sequence                 |
|-------|------------|-----------|--------------------------|
| 42.3  | 873.491959 | -0.008631 | <a href="#">DKITELR</a>  |
| 25.0  | 873.491959 | -0.008631 | <a href="#">KEVTLEK</a>  |
| 12.6  | 873.491943 | -0.008615 | <a href="#">ELSKEIR</a>  |
| 12.6  | 873.491959 | -0.008631 | <a href="#">TDLKELR</a>  |
| 9.3   | 873.480713 | 0.002615  | <a href="#">KDLELEK</a>  |
| 9.3   | 873.480713 | 0.002615  | <a href="#">KDLLEEK</a>  |
| 9.3   | 873.491974 | -0.008646 | <a href="#">KDLSGVQK</a> |
| 9.2   | 873.482071 | 0.001257  | <a href="#">KHYGTIR</a>  |
| 9.2   | 873.491959 | -0.008631 | <a href="#">KLEDTIR</a>  |
| 6.3   | 873.482071 | 0.001257  | <a href="#">KLFSSHR</a>  |

# Mascot Search Results

## Peptide View

MS/MS Fragmentation of **DLNPDVNVFQR**

Found in **VPPI\_HUMAN**, V-type proton ATPase 116 kDa subunit a isoform 1 OS=Homo sapiens GN=ATP6V0A1 PE=1 SV=3

Match to Query 36859: 1315.661268 from(658.837910,2+) rtinseconds(2642) index(33826)

Title: Locus:1.1.1.2350.31

Data file 2011-11-10 - TFD - EP 4-1.mgf

Click mouse within plot area to zoom in by factor of two about that point

Or, Plot from  to  Da

Label all possible matches  Label matches used for scoring

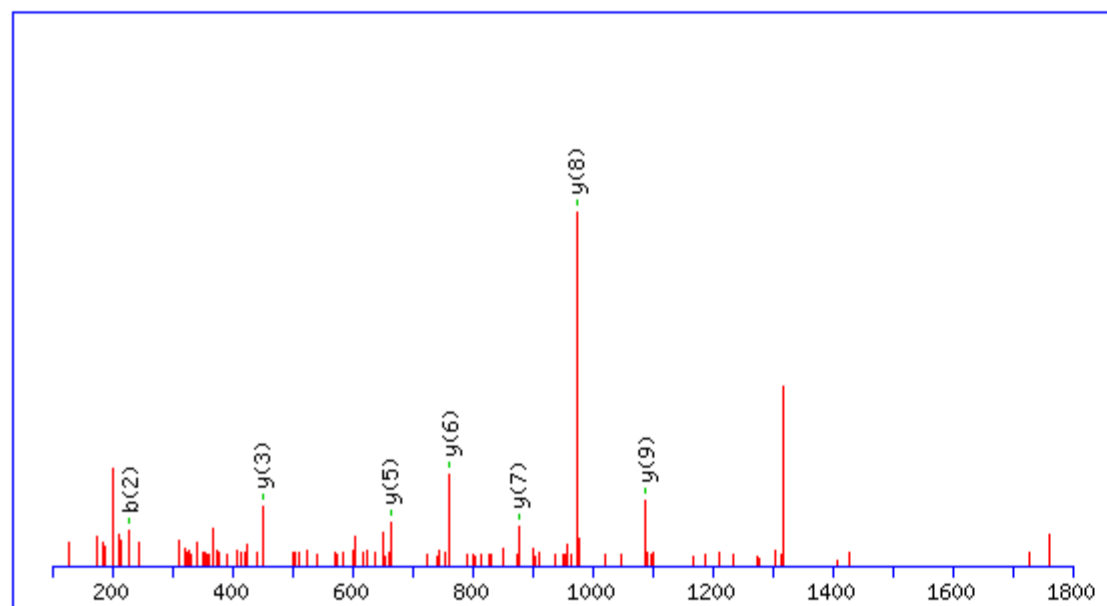

Monoisotopic mass of neutral peptide Mr(calc): 1315.652069

Fixed modifications: Propionamide (C) (apply to specified residues or termini only)

Ions Score: 36 Expect: 0.00084

Matches : 7/104 fragment ions using 12 most intense peaks ([help](#))

| #  | b                 | b <sup>++</sup> | b*          | b <sup>+++</sup> | b <sup>0</sup> | b <sup>0++</sup> | Seq. | y                  | y <sup>++</sup> | y*          | y <sup>+++</sup> | y <sup>0</sup> | y <sup>0++</sup> | #  |
|----|-------------------|-----------------|-------------|------------------|----------------|------------------|------|--------------------|-----------------|-------------|------------------|----------------|------------------|----|
| 1  | 116.034219        | 58.520748       |             |                  | 98.023654      | 49.515465        | D    |                    |                 |             |                  |                |                  | 11 |
| 2  | <b>229.118283</b> | 115.062779      |             |                  | 211.107718     | 106.057497       | L    | 1201.632397        | 601.319836      | 1184.605848 | 592.806562       | 1183.621832    | 592.314554       | 10 |
| 3  | 343.161210        | 172.084243      | 326.134661  | 163.570968       | 325.150645     | 163.078960       | N    | <b>1088.548333</b> | 544.777805      | 1071.521784 | 536.264530       | 1070.537768    | 535.772522       | 9  |
| 4  | 440.213974        | 220.610625      | 423.187425  | 212.097350       | 422.203409     | 211.605342       | P    | <b>974.505406</b>  | 487.756341      | 957.478857  | 479.243067       | 956.494841     | 478.751059       | 8  |
| 5  | 555.240917        | 278.124097      | 538.214368  | 269.610822       | 537.230352     | 269.118814       | D    | <b>877.452642</b>  | 439.229959      | 860.426093  | 430.716684       | 859.442077     | 430.224676       | 7  |
| 6  | 654.309331        | 327.658303      | 637.282782  | 319.145029       | 636.298766     | 318.653021       | V    | <b>762.425699</b>  | 381.716488      | 745.399150  | 373.203213       |                |                  | 6  |
| 7  | 768.352258        | 384.679767      | 751.325709  | 376.166492       | 750.341693     | 375.674484       | N    | <b>663.357285</b>  | 332.182281      | 646.330736  | 323.669006       |                |                  | 5  |
| 8  | 867.420672        | 434.213974      | 850.394123  | 425.700699       | 849.410107     | 425.208691       | V    | 549.314358         | 275.160817      | 532.287809  | 266.647543       |                |                  | 4  |
| 9  | 1014.489086       | 507.748181      | 997.462537  | 499.234906       | 996.478521     | 498.742898       | F    | <b>450.245944</b>  | 225.626610      | 433.219395  | 217.113336       |                |                  | 3  |
| 10 | 1142.547664       | 571.777470      | 1125.521115 | 563.264196       | 1124.537099    | 562.772187       | Q    | 303.177530         | 152.092403      | 286.150981  | 143.579129       |                |                  | 2  |
| 11 |                   |                 |             |                  |                |                  | R    | 175.118952         | 88.063114       | 158.092403  | 79.549839        |                |                  | 1  |

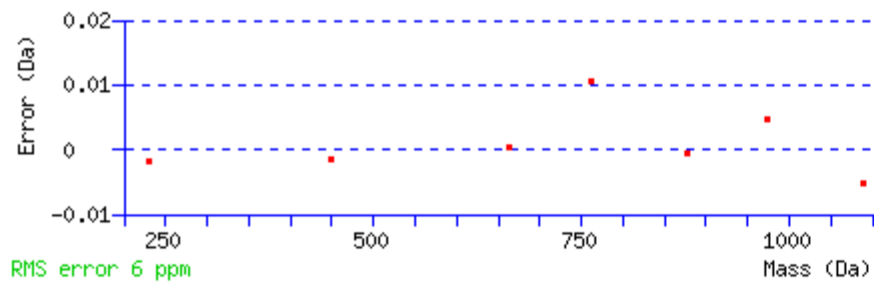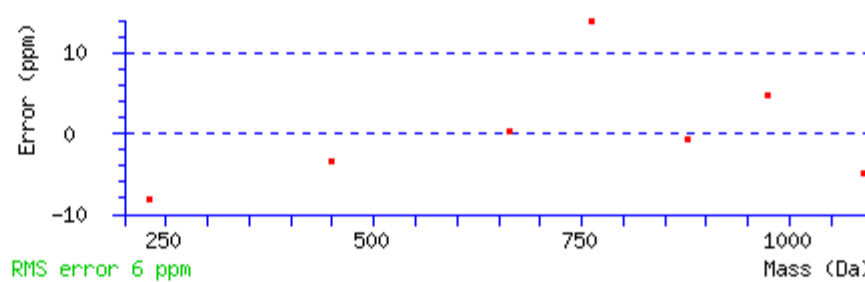

NCBI BLAST search of **DLNPDVNVFQR**

(Parameters: blastp, nr protein database, expect=20000, no filter, PAM30)

Other BLAST [web gateways](#)

All matches to this query

| Score | Mr(calc):   | Delta    | Sequence                    |
|-------|-------------|----------|-----------------------------|
| 36.3  | 1315.652069 | 0.009199 | <a href="#">DLNPDVNVFQR</a> |
| 3.5   | 1315.652039 | 0.009229 | <a href="#">KTPYEEQLHR</a>  |

Mascot: <http://www.matrixscience.com/>

# MASCOT SCIENCE Mascot Search Results

## Peptide View

MS/MS Fragmentation of **VFSALGAAAYGTAK**

Found in **VATL\_HUMAN**, V-type proton ATPase 16 kDa proteolipid subunit OS=Homo sapiens GN=ATP6V0C PE=1 SV=1

Match to Query 587795: 1254.657728 from(628.336140,2+) rtinseconds(2399) index(999008)

Title: Locus:1.1.1.1407.35

Data file C:\Program Files (x86)\Matrix Science\Mascot Daemon\mgf3 TFD - Epitel - R2\mascot\_daemon\_merge.mgf

Click mouse within plot area to zoom in by factor of two about that point

Or, Plot from  to  Da

Label all possible matches  Label matches used for scoring

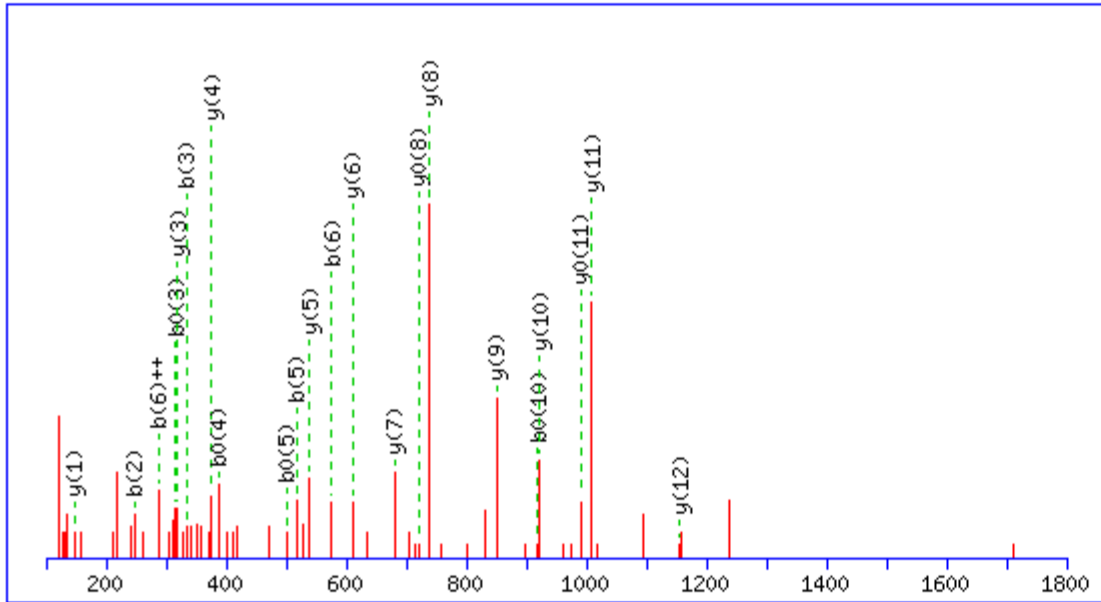

Monoisotopic mass of neutral peptide Mr(calc): 1254.660828

Fixed modifications: Carbamidomethyl (C) (apply to specified residues or termini only)

Ions Score: 76 Expect: 4e-007

Matches : 22/112 fragment ions using 44 most intense peaks ([help](#))

| #  | b                 | b <sup>++</sup>   | b <sup>0</sup>    | b <sup>0++</sup> | Seq. | y                  | y <sup>++</sup> | y <sup>*</sup> | y <sup>*++</sup> | y <sup>0</sup>    | y <sup>0++</sup> | #  |
|----|-------------------|-------------------|-------------------|------------------|------|--------------------|-----------------|----------------|------------------|-------------------|------------------|----|
| 1  | 100.075690        | 50.541483         |                   |                  | V    |                    |                 |                |                  |                   |                  | 13 |
| 2  | <b>247.144104</b> | 124.075690        |                   |                  | F    | <b>1156.599702</b> | 578.803489      | 1139.573153    | 570.290215       | 1138.589137       | 569.798206       | 12 |
| 3  | <b>334.176132</b> | 167.591704        | <b>316.165567</b> | 158.586422       | S    | <b>1009.531288</b> | 505.269282      | 992.504739     | 496.756008       | <b>991.520723</b> | 496.264000       | 11 |
| 4  | 405.213246        | 203.110261        | <b>387.202681</b> | 194.104978       | A    | <b>922.499260</b>  | 461.753268      | 905.472711     | 453.239994       | 904.488695        | 452.747986       | 10 |
| 5  | <b>518.297310</b> | 259.652293        | <b>500.286745</b> | 250.647011       | L    | <b>851.462146</b>  | 426.234711      | 834.435597     | 417.721437       | 833.451581        | 417.229429       | 9  |
| 6  | <b>575.318774</b> | <b>288.163025</b> | 557.308209        | 279.157743       | G    | <b>738.378082</b>  | 369.692679      | 721.351533     | 361.179405       | <b>720.367517</b> | 360.687397       | 8  |
| 7  | 646.355888        | 323.681582        | 628.345323        | 314.676300       | A    | <b>681.356618</b>  | 341.181947      | 664.330069     | 332.668673       | 663.346053        | 332.176665       | 7  |
| 8  | 717.393002        | 359.200139        | 699.382437        | 350.194857       | A    | <b>610.319504</b>  | 305.663390      | 593.292955     | 297.150116       | 592.308939        | 296.658108       | 6  |
| 9  | 880.456331        | 440.731804        | 862.445766        | 431.726521       | Y    | <b>539.282390</b>  | 270.144833      | 522.255841     | 261.631559       | 521.271825        | 261.139551       | 5  |
| 10 | 937.477795        | 469.242536        | <b>919.467230</b> | 460.237253       | G    | <b>376.219061</b>  | 188.613168      | 359.192512     | 180.099894       | 358.208496        | 179.607886       | 4  |
| 11 | 1038.525474       | 519.766375        | 1020.514909       | 510.761093       | T    | <b>319.197597</b>  | 160.102436      | 302.171048     | 151.589162       | 301.187032        | 151.097154       | 3  |
| 12 | 1109.562588       | 555.284932        | 1091.552023       | 546.279650       | A    | 218.149918         | 109.578597      | 201.123369     | 101.065322       |                   |                  | 2  |
| 13 |                   |                   |                   |                  | K    | <b>147.112804</b>  | 74.060040       | 130.086255     | 65.546765        |                   |                  | 1  |

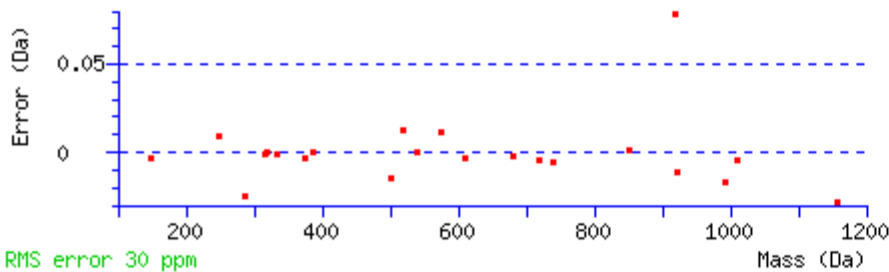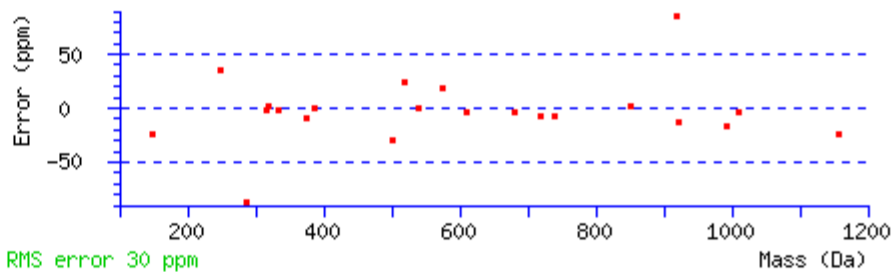

NCBI BLAST search of **VFSALGAAAYGTAK**

(Parameters: blastp, nr protein database, expect=20000, no filter, PAM30)

Other BLAST [web gateways](#)

## All matches to this query

| Score | Mr(calc):   | Delta     | Sequence                       |
|-------|-------------|-----------|--------------------------------|
| 75.5  | 1254.660828 | -0.003100 | <a href="#">VFSALGAAAYGTAK</a> |
| 7.7   | 1254.668045 | -0.010317 | <a href="#">SLRLGPGGLDDR</a>   |
| 7.5   | 1254.668243 | -0.010515 | <a href="#">VFSAFITVLQM</a>    |
| 6.9   | 1254.660828 | -0.003100 | <a href="#">SYPGLTSYLVR</a>    |
| 2.8   | 1254.664200 | -0.006472 | <a href="#">TPPGSPQLAMLK</a>   |
| 1.2   | 1254.664200 | -0.006472 | <a href="#">TPPGSPQLAMLK</a>   |

Mascot: <http://www.matrixscience.com/>

**Peptide View**

MS/MS Fragmentation of **IQQIETTLNILDAK**

Found in **CCD53\_HUMAN**, WASH complex subunit CCDC53 OS=Homo sapiens GN=CCDC53 PE=1 SV=1

Match to Query 46514: 1598.885228 from(800.449890,2+) rtinseconds(3213) index(41258)

Title: Locus:1.1.1.2808.37

Data file 2011-11-12 - TFD - EP 5-5.mgf

Click mouse within plot area to zoom in by factor of two about that point

Or, Plot from  to  Da

Label all possible matches  Label matches used for scoring

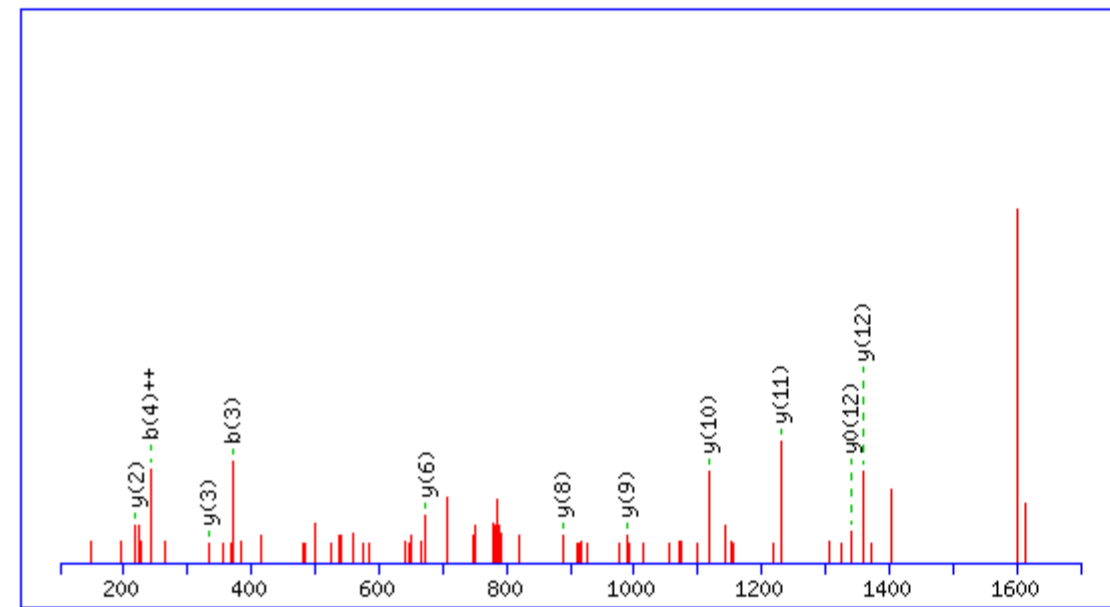

Monoisotopic mass of neutral peptide Mr(calc): 1598.887909

Fixed modifications: Propionamide (C) (apply to specified residues or termini only)

Ions Score: 40 Expect: 0.00027

Matches : 12/142 fragment ions using 26 most intense peaks [\(help\)](#)

| #  | b                 | b <sup>++</sup>   | b <sup>*</sup> | b <sup>*++</sup> | b <sup>0</sup> | b <sup>0++</sup> | Seq. | y                  | y <sup>++</sup> | y <sup>*</sup> | y <sup>*++</sup> | y <sup>0</sup>     | y <sup>0++</sup> | #  |
|----|-------------------|-------------------|----------------|------------------|----------------|------------------|------|--------------------|-----------------|----------------|------------------|--------------------|------------------|----|
| 1  | 114.091340        | 57.549308         |                |                  |                |                  | I    |                    |                 |                |                  |                    |                  | 14 |
| 2  | <b>242.149918</b> | 121.578597        | 225.123369     | 113.065323       |                |                  | Q    | 1486.811151        | 743.909214      | 1469.784602    | 735.395939       | 1468.800586        | 734.903931       | 13 |
| 3  | <b>370.208496</b> | 185.607886        | 353.181947     | 177.094612       |                |                  | Q    | <b>1358.752573</b> | 679.879925      | 1341.726024    | 671.366650       | <b>1340.742008</b> | 670.874642       | 12 |
| 4  | 483.292560        | <b>242.149918</b> | 466.266011     | 233.636644       |                |                  | I    | <b>1230.693995</b> | 615.850635      | 1213.667446    | 607.337361       | 1212.683430        | 606.845353       | 11 |
| 5  | 612.335153        | 306.671215        | 595.308604     | 298.157940       | 594.324588     | 297.665932       | E    | <b>1117.609931</b> | 559.308604      | 1100.583382    | 550.795329       | 1099.599366        | 550.303321       | 10 |
| 6  | 713.382832        | 357.195054        | 696.356283     | 348.681780       | 695.372267     | 348.189772       | T    | <b>988.567338</b>  | 494.787307      | 971.540789     | 486.274032       | 970.556773         | 485.782024       | 9  |
| 7  | 814.430511        | 407.718894        | 797.403962     | 399.205619       | 796.419946     | 398.713611       | T    | <b>887.519659</b>  | 444.263467      | 870.493110     | 435.750193       | 869.509094         | 435.258185       | 8  |
| 8  | 927.514575        | 464.260926        | 910.488026     | 455.747651       | 909.504010     | 455.255643       | L    | 786.471980         | 393.739628      | 769.445431     | 385.226353       | 768.461415         | 384.734345       | 7  |
| 9  | 1041.557502       | 521.282389        | 1024.530953    | 512.769115       | 1023.546937    | 512.277107       | N    | <b>673.387916</b>  | 337.197596      | 656.361367     | 328.684321       | 655.377351         | 328.192313       | 6  |
| 10 | 1154.641566       | 577.824421        | 1137.615017    | 569.311147       | 1136.631001    | 568.819139       | I    | 559.344989         | 280.176132      | 542.318440     | 271.662858       | 541.334424         | 271.170850       | 5  |
| 11 | 1267.725630       | 634.366453        | 1250.699081    | 625.853179       | 1249.715065    | 625.361170       | L    | 446.260925         | 223.634100      | 429.234376     | 215.120826       | 428.250360         | 214.628818       | 4  |
| 12 | 1382.752573       | 691.879925        | 1365.726024    | 683.366650       | 1364.742008    | 682.874642       | D    | <b>333.176861</b>  | 167.092069      | 316.150312     | 158.578794       | 315.166296         | 158.086786       | 3  |
| 13 | 1453.789687       | 727.398482        | 1436.763138    | 718.885207       | 1435.779122    | 718.393199       | A    | <b>218.149918</b>  | 109.578597      | 201.123369     | 101.065322       |                    |                  | 2  |
| 14 |                   |                   |                |                  |                |                  | K    | 147.112804         | 74.060040       | 130.086255     | 65.546765        |                    |                  | 1  |

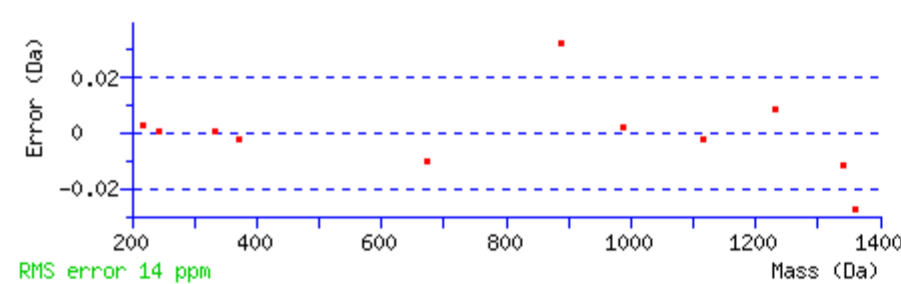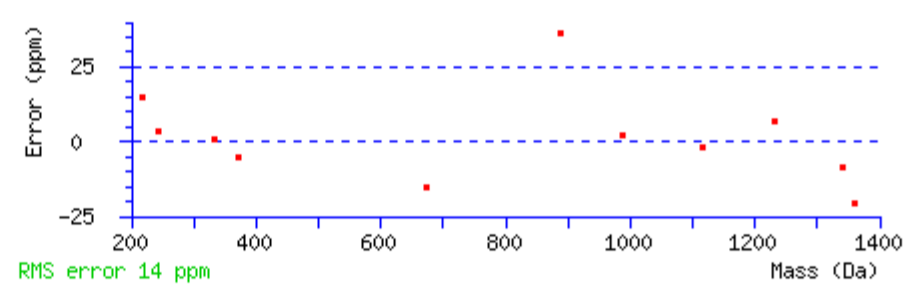

NCBI BLAST search of **IQQIETTLNILDAK**

(Parameters: blastp, nr protein database, expect=20000, no filter, PAM30)

Other BLAST [web gateways](#)

**All matches to this query**

| Score | Mr(calc):   | Delta     | Sequence                       |
|-------|-------------|-----------|--------------------------------|
| 39.7  | 1598.887909 | -0.002681 | <a href="#">IQQIETTLNILDAK</a> |
| 1.6   | 1598.887924 | -0.002696 | <a href="#">LQKQTDLDLSPLTK</a> |
| 1.1   | 1598.870163 | 0.015065  | <a href="#">LLQQCETLKVPPK</a>  |



# MASCOT SCIENCE Mascot Search Results

## Peptide View

MS/MS Fragmentation of **EDGVITASEDR**

Found in **WDFY1\_HUMAN**, WD repeat and FYVE domain-containing protein 1 OS=Homo sapiens GN=WDFY1 PE=1 SV=1

Match to Query 508549: 1190.546148 from(596.280350,2+) rtinseconds(1326) index(334640)

Title: Locus:1.1.1.840.40

Data file C:\Program Files (x86)\Matrix Science\Mascot Daemon\mgf\3 TFD - Epitel - R2\mascot\_daemon\_merge.mgf

Click mouse within plot area to zoom in by factor of two about that point

Or, Plot from  to  Da

Label all possible matches  Label matches used for scoring

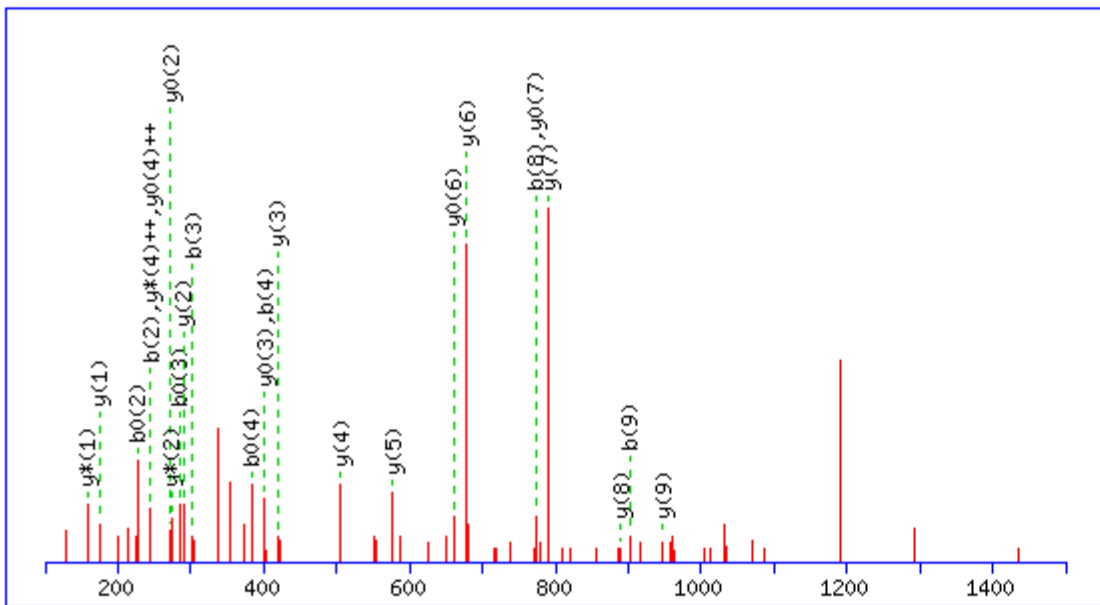

Monoisotopic mass of neutral peptide Mr(calc): 1190.541504

Fixed modifications: Carbamidomethyl (C) (apply to specified residues or termini only)

Ions Score: 51 Expect: 9e-005

Matches : 25/98 fragment ions using 52 most intense peaks [\(help\)](#)

| #  | b                 | b <sup>++</sup> | b <sup>0</sup>    | b <sup>0++</sup> | Seq. | y                 | y <sup>++</sup> | y <sup>*</sup>    | y <sup>++</sup>   | y <sup>0</sup>    | y <sup>0++</sup>  | #  |
|----|-------------------|-----------------|-------------------|------------------|------|-------------------|-----------------|-------------------|-------------------|-------------------|-------------------|----|
| 1  | 130.049869        | 65.528572       | 112.039304        | 56.523290        | E    |                   |                 |                   |                   |                   |                   | 11 |
| 2  | <b>245.076812</b> | 123.042044      | <b>227.066247</b> | 114.036762       | D    | 1062.506194       | 531.756735      | 1045.479645       | 523.243460        | 1044.495629       | 522.751452        | 10 |
| 3  | <b>302.098276</b> | 151.552776      | <b>284.087711</b> | 142.547494       | G    | <b>947.479251</b> | 474.243264      | 930.452702        | 465.729989        | 929.468686        | 465.237981        | 9  |
| 4  | <b>401.166690</b> | 201.086983      | <b>383.156125</b> | 192.081701       | V    | <b>890.457787</b> | 445.732531      | 873.431238        | 437.219257        | 872.447222        | 436.727249        | 8  |
| 5  | 514.250754        | 257.629015      | 496.240189        | 248.623733       | I    | <b>791.389373</b> | 396.198325      | 774.362824        | 387.685050        | <b>773.378808</b> | 387.193042        | 7  |
| 6  | 615.298433        | 308.152855      | 597.287868        | 299.147572       | T    | <b>678.305309</b> | 339.656293      | 661.278760        | 331.143018        | <b>660.294744</b> | 330.651010        | 6  |
| 7  | 686.335547        | 343.671412      | 668.324982        | 334.666129       | A    | <b>577.257630</b> | 289.132453      | 560.231081        | 280.619178        | 559.247065        | 280.127170        | 5  |
| 8  | <b>773.367575</b> | 387.187426      | 755.357010        | 378.182143       | S    | <b>506.220516</b> | 253.613896      | 489.193967        | <b>245.100621</b> | 488.209951        | <b>244.608613</b> | 4  |
| 9  | <b>902.410168</b> | 451.708722      | 884.399603        | 442.703440       | E    | <b>419.188488</b> | 210.097882      | 402.161939        | 201.584607        | <b>401.177923</b> | 201.092599        | 3  |
| 10 | 1017.437111       | 509.222194      | 999.426546        | 500.216911       | D    | <b>290.145895</b> | 145.576585      | <b>273.119346</b> | 137.063311        | <b>272.135330</b> | 136.571303        | 2  |
| 11 |                   |                 |                   |                  | R    | <b>175.118952</b> | 88.063114       | <b>158.092403</b> | 79.549839         |                   |                   | 1  |

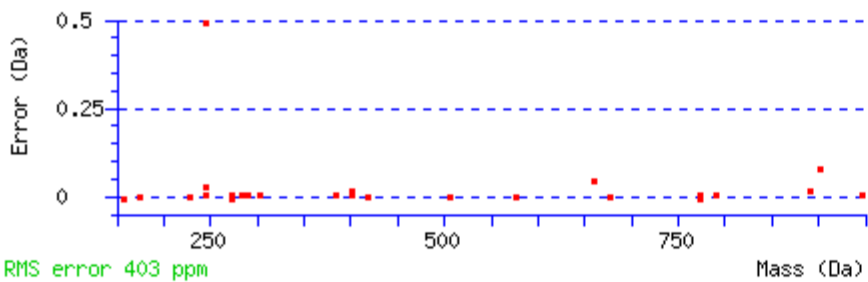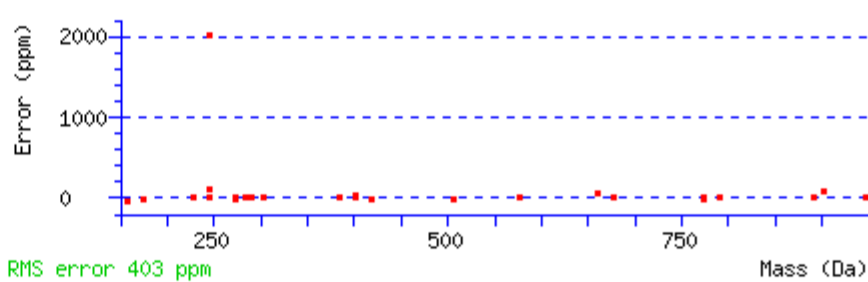

NCBI BLAST search of [EDGVITASEDR](#)

(Parameters: blastp, nr protein database, expect=20000, no filter, PAM30)

Other BLAST [web gateways](#)

All matches to this query

| Score | Mr(calc):   | Delta    | Sequence                    |
|-------|-------------|----------|-----------------------------|
| 51.2  | 1190.541504 | 0.004644 | <a href="#">EDGVITASEDR</a> |

Mascot: <http://www.matrixscience.com/>

# MASCOT SCIENCE Mascot Search Results

## Peptide View

MS/MS Fragmentation of **LITAIYADYAR**

Found in **WDR11\_HUMAN**, WD repeat-containing protein 11 OS=Homo sapiens GN=WDR11 PE=1 SV=1

Match to Query 30608: 1268.672228 from(635.343390,2+) rtinseconds(2764) index(33703)

Title: Locus:1.1.1.2603.30

Data file 2011-11-12 - TFD - EP 5-1.mgf

Click mouse within plot area to zoom in by factor of two about that point

Or, Plot from  to  Da

Label all possible matches  Label matches used for scoring

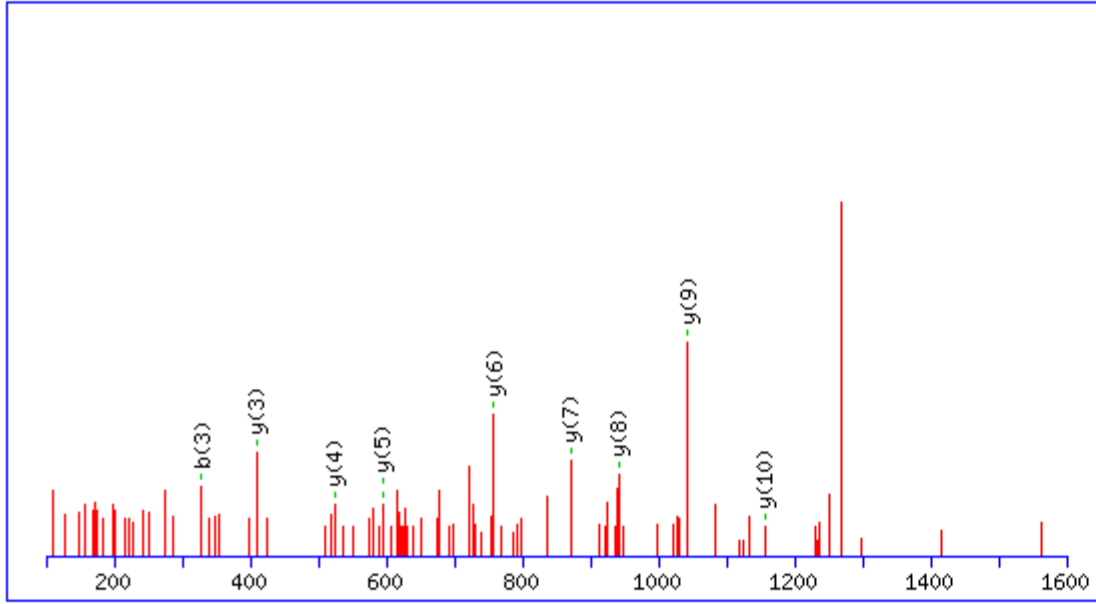

Monoisotopic mass of neutral peptide Mr(calc): 1268.676453

Fixed modifications: Propionamide (C) (apply to specified residues or termini only)

Ions Score: 41 Expect: 0.00018

Matches : 9/90 fragment ions using 24 most intense peaks [\(help\)](#)

| #  | b                 | b <sup>++</sup> | b <sup>0</sup> | b <sup>0++</sup> | Seq. | y                  | y <sup>++</sup> | y <sup>*</sup> | y <sup>*++</sup> | y <sup>0</sup> | y <sup>0++</sup> | #  |
|----|-------------------|-----------------|----------------|------------------|------|--------------------|-----------------|----------------|------------------|----------------|------------------|----|
| 1  | 114.091340        | 57.549308       |                |                  | L    |                    |                 |                |                  |                |                  | 11 |
| 2  | 227.175404        | 114.091340      |                |                  | I    | <b>1156.599702</b> | 578.803489      | 1139.573153    | 570.290215       | 1138.589137    | 569.798206       | 10 |
| 3  | <b>328.223083</b> | 164.615179      | 310.212518     | 155.609897       | T    | <b>1043.515638</b> | 522.261457      | 1026.489089    | 513.748182       | 1025.505073    | 513.256174       | 9  |
| 4  | 399.260197        | 200.133737      | 381.249632     | 191.128454       | A    | <b>942.467959</b>  | 471.737617      | 925.441410     | 463.224343       | 924.457394     | 462.732335       | 8  |
| 5  | 512.344261        | 256.675769      | 494.333696     | 247.670486       | I    | <b>871.430845</b>  | 436.219060      | 854.404296     | 427.705786       | 853.420280     | 427.213778       | 7  |
| 6  | 675.407590        | 338.207433      | 657.397025     | 329.202151       | Y    | <b>758.346781</b>  | 379.677028      | 741.320232     | 371.163754       | 740.336216     | 370.671746       | 6  |
| 7  | 746.444704        | 373.725990      | 728.434139     | 364.720708       | A    | <b>595.283452</b>  | 298.145364      | 578.256903     | 289.632089       | 577.272887     | 289.140081       | 5  |
| 8  | 861.471647        | 431.239462      | 843.461082     | 422.234179       | D    | <b>524.246338</b>  | 262.626807      | 507.219789     | 254.113532       | 506.235773     | 253.621524       | 4  |
| 9  | 1024.534976       | 512.771126      | 1006.524411    | 503.765843       | Y    | <b>409.219395</b>  | 205.113335      | 392.192846     | 196.600061       |                |                  | 3  |
| 10 | 1095.572090       | 548.289683      | 1077.561525    | 539.284400       | A    | 246.156066         | 123.581671      | 229.129517     | 115.068396       |                |                  | 2  |
| 11 |                   |                 |                |                  | R    | 175.118952         | 88.063114       | 158.092403     | 79.549839        |                |                  | 1  |

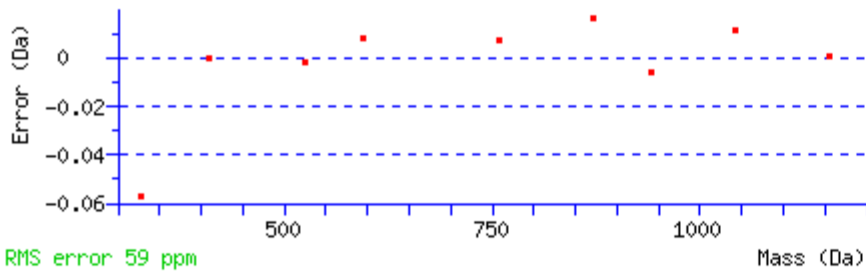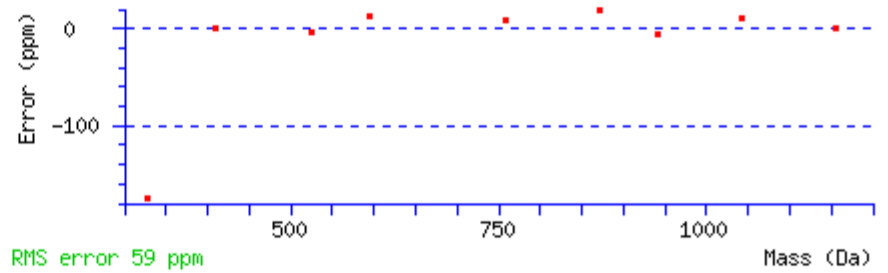

NCBI BLAST search of [LITAIYADYAR](#)

(Parameters: blastp, nr protein database, expect=20000, no filter, PAM30)

Other BLAST [web gateways](#)

All matches to this query

| Score | Mr(calc):   | Delta     | Sequence                    |
|-------|-------------|-----------|-----------------------------|
| 41.2  | 1268.676453 | -0.004225 | <a href="#">LITAIYADYAR</a> |
| 1.4   | 1268.662582 | 0.009646  | <a href="#">RTSQGFGFTLR</a> |

Mascot: <http://www.matrixscience.com/>

# MASCOT SCIENCE Mascot Search Results

## Peptide View

MS/MS Fragmentation of **EPPKVPK**

Found in **WDR36\_HUMAN**, WD repeat-containing protein 36 OS=Homo sapiens GN=WDR36 PE=1 SV=1

Match to Query 881: 809.467028 from(405.740790,2+) rtinseconds(2199) index(8309)

Title: Locus:1.1.1.2451.2

Data file 2011-11-10 - TFD - EP 4-8.mgf

Click mouse within plot area to zoom in by factor of two about that point

Or, Plot from  to  Da

Label all possible matches  Label matches used for scoring

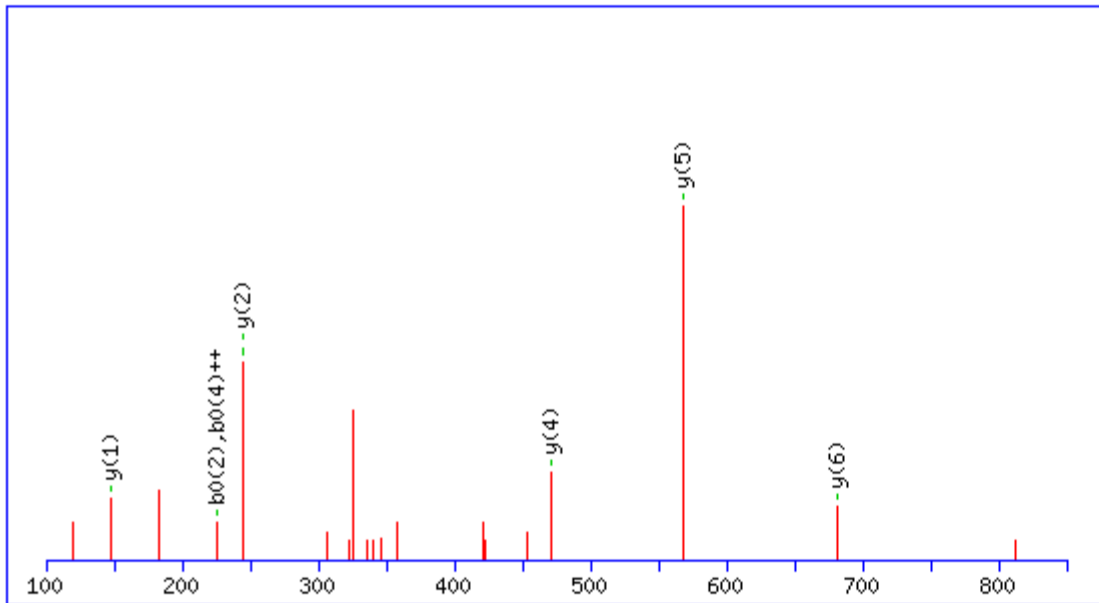

Monoisotopic mass of neutral peptide Mr(calc): 809.464691

Fixed modifications: Propionamide (C) (apply to specified residues or termini only)

Variable modifications:

P2 : Oxidation (P)

Ions Score: 35 Expect: 0.00069

Matches : 7/54 fragment ions using 10 most intense peaks ([help](#))

| # | b          | b <sup>++</sup> | b <sup>*</sup> | b <sup>*++</sup> | b <sup>0</sup> | b <sup>0++</sup> | Seq. | y          | y <sup>++</sup> | y <sup>*</sup> | y <sup>*++</sup> | # |
|---|------------|-----------------|----------------|------------------|----------------|------------------|------|------------|-----------------|----------------|------------------|---|
| 1 | 130.049869 | 65.528572       |                |                  | 112.039304     | 56.523290        | E    |            |                 |                |                  | 7 |
| 2 | 243.097548 | 122.052412      |                |                  | 225.086983     | 113.047129       | P    | 681.429388 | 341.218332      | 664.402839     | 332.705058       | 6 |
| 3 | 340.150312 | 170.578794      |                |                  | 322.139747     | 161.573512       | P    | 568.381709 | 284.694493      | 551.355160     | 276.181218       | 5 |
| 4 | 468.245275 | 234.626275      | 451.218726     | 226.113001       | 450.234710     | 225.620993       | K    | 471.328945 | 236.168111      | 454.302396     | 227.654836       | 4 |
| 5 | 567.313689 | 284.160483      | 550.287140     | 275.647208       | 549.303124     | 275.155200       | V    | 343.233982 | 172.120629      | 326.207433     | 163.607355       | 3 |
| 6 | 664.366453 | 332.686865      | 647.339904     | 324.173590       | 646.355888     | 323.681582       | P    | 244.165568 | 122.586422      | 227.139019     | 114.073148       | 2 |
| 7 |            |                 |                |                  |                |                  | K    | 147.112804 | 74.060040       | 130.086255     | 65.546765        | 1 |

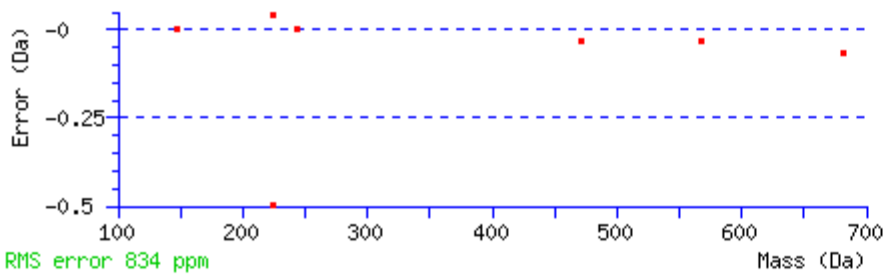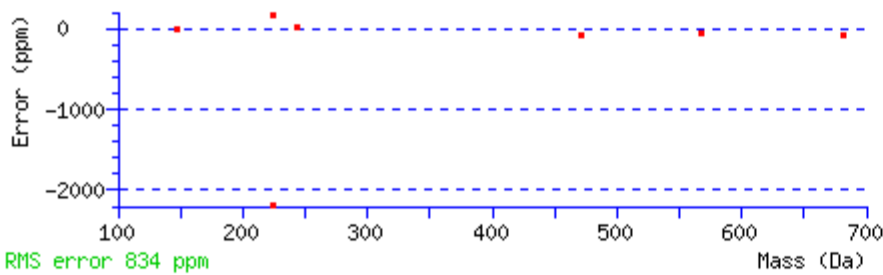

NCBI BLAST search of [EPPKVPK](#)

(Parameters: blastp, nr protein database, expect=20000, no filter, PAM30)

Other BLAST [web gateways](#)

## All matches to this query

| Score | Mr(calc):  | Delta    | Sequence                 |
|-------|------------|----------|--------------------------|
| 35.3  | 809.464691 | 0.002337 | <a href="#">EPPKVPK</a>  |
| 21.1  | 809.464676 | 0.002352 | <a href="#">ELPPNLK</a>  |
| 19.7  | 809.464691 | 0.002337 | <a href="#">EPPKVPK</a>  |
| 13.7  | 809.464691 | 0.002337 | <a href="#">EKVPPPK</a>  |
| 13.7  | 809.464691 | 0.002337 | <a href="#">EKVPPPK</a>  |
| 13.7  | 809.464691 | 0.002337 | <a href="#">EVKPPPK</a>  |
| 13.7  | 809.464691 | 0.002337 | <a href="#">EVKPPPK</a>  |
| 1.9   | 809.464691 | 0.002337 | <a href="#">EKVPPPK</a>  |
| 1.9   | 809.464691 | 0.002337 | <a href="#">EVKPPPK</a>  |
| 0.7   | 809.464691 | 0.002337 | <a href="#">LPGGLEPK</a> |

# MASCOT Search Results

## Peptide View

MS/MS Fragmentation of **TLIDDDNPPVSFVK**

Found in **WDR5\_HUMAN**, WD repeat-containing protein 5 OS=Homo sapiens GN=WDR5 PE=1 SV=1

Match to Query 49808: 1558.783188 from(780.398870,2+) rtinseconds(2822) index(37581)

Title: Locus:1.1.1.2489.45

Data file 2011-11-12 - TFD - EP 5-4.mgf

Click mouse within plot area to zoom in by factor of two about that point

Or, Plot from  to  Da

Label all possible matches  Label matches used for scoring

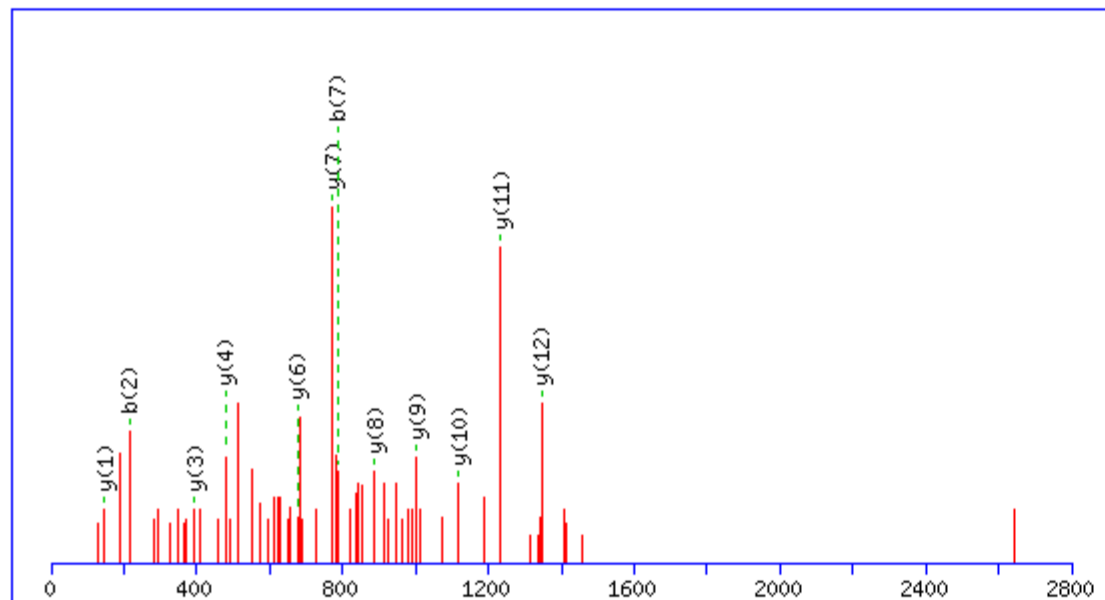

Monoisotopic mass of neutral peptide Mr(calc): 1558.787903

Fixed modifications: Propionamide (C) (apply to specified residues or termini only)

Ions Score: 43 Expect: 0.00037

Matches : 12/138 fragment ions using 36 most intense peaks ([help](#))

| #  | b                 | b <sup>++</sup> | b <sup>+</sup> | b <sup>*++</sup> | b <sup>0</sup> | b <sup>0++</sup> | Seq. | y                  | y <sup>++</sup> | y <sup>+</sup> | y <sup>*++</sup> | y <sup>0</sup> | y <sup>0++</sup> | #  |
|----|-------------------|-----------------|----------------|------------------|----------------|------------------|------|--------------------|-----------------|----------------|------------------|----------------|------------------|----|
| 1  | 102.054955        | 51.531116       |                |                  | 84.044390      | 42.525833        | T    |                    |                 |                |                  |                |                  | 14 |
| 2  | <b>215.139019</b> | 108.073147      |                |                  | 197.128454     | 99.067865        | L    | 1458.747486        | 729.877381      | 1441.720937    | 721.364107       | 1440.736921    | 720.872099       | 13 |
| 3  | 328.223083        | 164.615179      |                |                  | 310.212518     | 155.609897       | I    | <b>1345.663422</b> | 673.335349      | 1328.636873    | 664.822075       | 1327.652857    | 664.330067       | 12 |
| 4  | 443.250026        | 222.128651      |                |                  | 425.239461     | 213.123369       | D    | <b>1232.579358</b> | 616.793317      | 1215.552809    | 608.280043       | 1214.568793    | 607.788035       | 11 |
| 5  | 558.276969        | 279.642123      |                |                  | 540.266404     | 270.636840       | D    | <b>1117.552415</b> | 559.279846      | 1100.525866    | 550.766571       | 1099.541850    | 550.274563       | 10 |
| 6  | 673.303912        | 337.155594      |                |                  | 655.293347     | 328.150311       | D    | <b>1002.525472</b> | 501.766374      | 985.498923     | 493.253100       | 984.514907     | 492.761092       | 9  |
| 7  | <b>787.346839</b> | 394.177057      | 770.320290     | 385.663783       | 769.336274     | 385.171775       | N    | <b>887.498529</b>  | 444.252903      | 870.471980     | 435.739628       | 869.487964     | 435.247620       | 8  |
| 8  | 884.399603        | 442.703440      | 867.373054     | 434.190165       | 866.389038     | 433.698157       | P    | <b>773.455602</b>  | 387.231439      | 756.429053     | 378.718165       | 755.445037     | 378.226157       | 7  |
| 9  | 981.452367        | 491.229822      | 964.425818     | 482.716547       | 963.441802     | 482.224539       | P    | <b>676.402838</b>  | 338.705057      | 659.376289     | 330.191783       | 658.392273     | 329.699775       | 6  |
| 10 | 1080.520781       | 540.764028      | 1063.494232    | 532.250754       | 1062.510216    | 531.758746       | V    | 579.350074         | 290.178675      | 562.323525     | 281.665401       | 561.339509     | 281.173393       | 5  |
| 11 | 1167.552809       | 584.280043      | 1150.526260    | 575.766768       | 1149.542244    | 575.274760       | S    | <b>480.281660</b>  | 240.644468      | 463.255111     | 232.131194       | 462.271095     | 231.639186       | 4  |
| 12 | 1314.621223       | 657.814250      | 1297.594674    | 649.300975       | 1296.610658    | 648.808967       | F    | <b>393.249632</b>  | 197.128454      | 376.223083     | 188.615180       |                |                  | 3  |
| 13 | 1413.689637       | 707.348457      | 1396.663088    | 698.835182       | 1395.679072    | 698.343174       | V    | 246.181218         | 123.594247      | 229.154669     | 115.080973       |                |                  | 2  |
| 14 |                   |                 |                |                  |                |                  | K    | <b>147.112804</b>  | 74.060040       | 130.086255     | 65.546765        |                |                  | 1  |

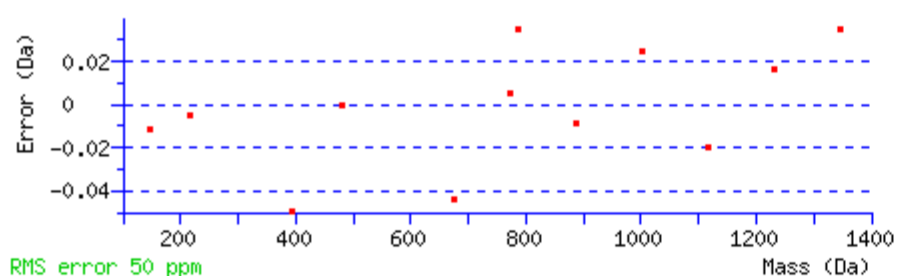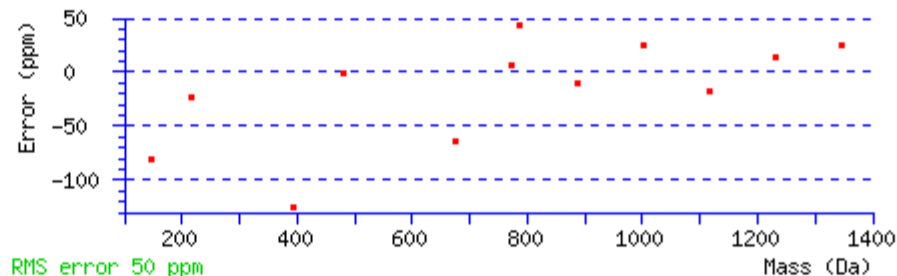

NCBI BLAST search of [TLIDDDNPPVSFVK](#)

(Parameters: blastp, nr protein database, expect=20000, no filter, PAM30)

Other BLAST [web gateways](#)

## All matches to this query

| Score | Mr(calc):   | Delta     | Sequence                       |
|-------|-------------|-----------|--------------------------------|
| 42.7  | 1558.787903 | -0.004715 | <a href="#">TLIDDDNPPVSFVK</a> |
| 5.9   | 1558.796616 | -0.013428 | <a href="#">TIRFLHSFTMYK</a>   |
| 3.3   | 1558.784714 | -0.001526 | <a href="#">MASSMKQVPNPLPK</a> |

# Mascot Search Results

## Peptide View

MS/MS Fragmentation of **YTHAANTVVYSSNK**

Found in **WDR82\_HUMAN**, WD repeat-containing protein 82 OS=Homo sapiens GN=WDR82 PE=1 SV=1

Match to Query 878778: 1553.747892 from(518.923240,3+) rtinseconds(1109) index(496073)

Title: Locus:1.1.1.747.22

Data file C:\Program Files (x86)\Matrix Science\Mascot Daemon\mgf3 TFD - Epitel - R2\mascot\_daemon\_merge.mgf

Click mouse within plot area to zoom in by factor of two about that point

Or, Plot from  to  Da

Label all possible matches  Label matches used for scoring

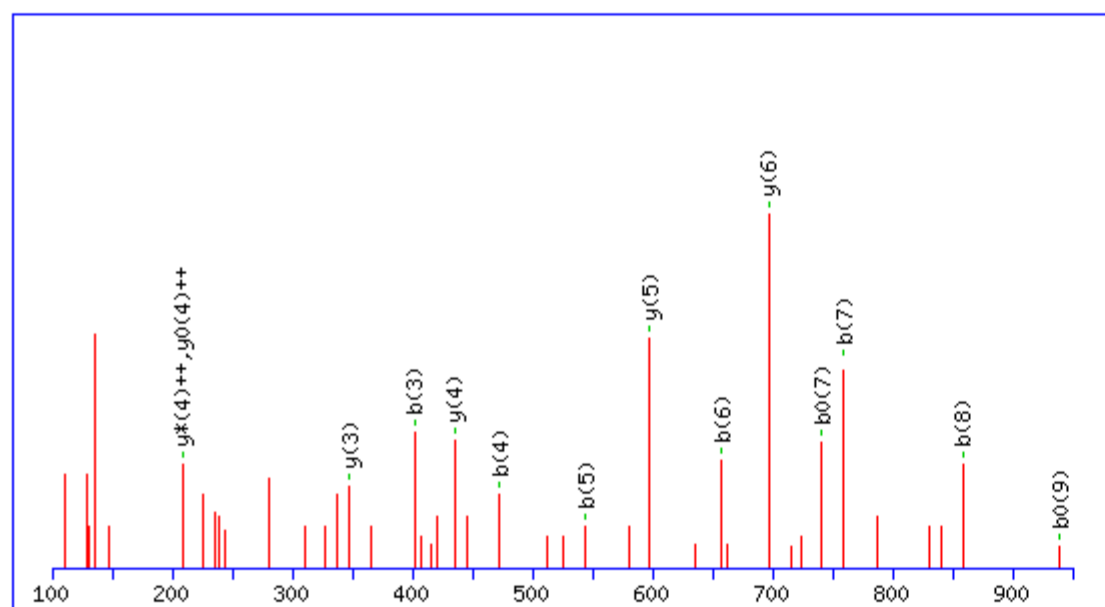

Monoisotopic mass of neutral peptide Mr(calc): 1553.747406

Fixed modifications: Carbamidomethyl (C) (apply to specified residues or termini only)

Ions Score: 52 Expect: 9.1e-005

Matches : 14/140 fragment ions using 17 most intense peaks [\(help\)](#)

| #  | b                 | b <sup>++</sup> | b <sup>*</sup> | b <sup>+++</sup> | b <sup>0</sup>    | b <sup>0++</sup> | Seq. | y                 | y <sup>++</sup> | y <sup>*</sup> | y <sup>+++</sup>  | y <sup>0</sup> | y <sup>0++</sup>  | #  |
|----|-------------------|-----------------|----------------|------------------|-------------------|------------------|------|-------------------|-----------------|----------------|-------------------|----------------|-------------------|----|
| 1  | 164.070605        | 82.538940       |                |                  |                   |                  | Y    |                   |                 |                |                   |                |                   | 14 |
| 2  | 265.118284        | 133.062780      |                |                  | 247.107719        | 124.057498       | T    | 1391.691369       | 696.349323      | 1374.664820    | 687.836048        | 1373.680804    | 687.344040        | 13 |
| 3  | <b>402.177196</b> | 201.592236      |                |                  | 384.166631        | 192.586954       | H    | 1290.643690       | 645.825483      | 1273.617141    | 637.312209        | 1272.633125    | 636.820201        | 12 |
| 4  | <b>473.214310</b> | 237.110793      |                |                  | 455.203745        | 228.105511       | A    | 1153.584778       | 577.296027      | 1136.558229    | 568.782753        | 1135.574213    | 568.290745        | 11 |
| 5  | <b>544.251424</b> | 272.629350      |                |                  | 526.240859        | 263.624068       | A    | 1082.547664       | 541.777470      | 1065.521115    | 533.264196        | 1064.537099    | 532.772188        | 10 |
| 6  | <b>658.294351</b> | 329.650814      | 641.267802     | 321.137539       | 640.283786        | 320.645531       | N    | 1011.510550       | 506.258913      | 994.484001     | 497.745639        | 993.499985     | 497.253631        | 9  |
| 7  | <b>759.342030</b> | 380.174653      | 742.315481     | 371.661379       | <b>741.331465</b> | 371.169371       | T    | 897.467623        | 449.237450      | 880.441074     | 440.724175        | 879.457058     | 440.232167        | 8  |
| 8  | <b>858.410444</b> | 429.708860      | 841.383895     | 421.195585       | 840.399879        | 420.703577       | V    | 796.419944        | 398.713610      | 779.393395     | 390.200336        | 778.409379     | 389.708328        | 7  |
| 9  | 957.478858        | 479.243067      | 940.452309     | 470.729792       | <b>939.468293</b> | 470.237784       | V    | <b>697.351530</b> | 349.179403      | 680.324981     | 340.666129        | 679.340965     | 340.174121        | 6  |
| 10 | 1120.542187       | 560.774732      | 1103.515638    | 552.261457       | 1102.531622       | 551.769449       | Y    | <b>598.283116</b> | 299.645196      | 581.256567     | 291.131922        | 580.272551     | 290.639914        | 5  |
| 11 | 1207.574215       | 604.290746      | 1190.547666    | 595.777471       | 1189.563650       | 595.285463       | S    | <b>435.219787</b> | 218.113532      | 418.193238     | <b>209.600257</b> | 417.209222     | <b>209.108249</b> | 4  |
| 12 | 1294.606243       | 647.806760      | 1277.579694    | 639.293485       | 1276.595678       | 638.801477       | S    | <b>348.187759</b> | 174.597518      | 331.161210     | 166.084243        | 330.177194     | 165.592235        | 3  |
| 13 | 1408.649170       | 704.828223      | 1391.622621    | 696.314949       | 1390.638605       | 695.822941       | N    | 261.155731        | 131.081503      | 244.129182     | 122.568229        |                |                   | 2  |
| 14 |                   |                 |                |                  |                   |                  | K    | 147.112804        | 74.060040       | 130.086255     | 65.546765         |                |                   | 1  |

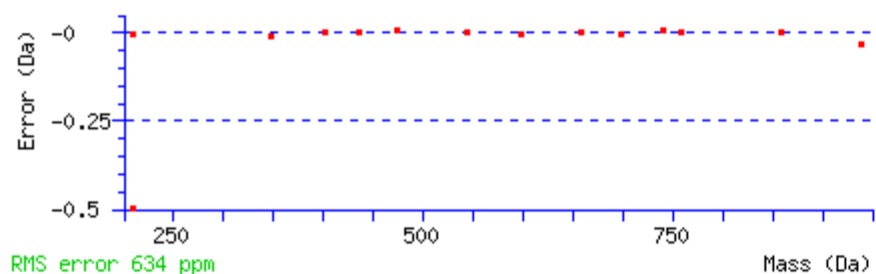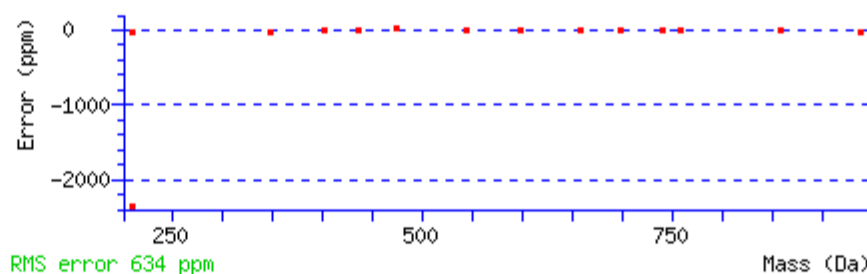

NCBI BLAST search of **YTHAANTVVYSSNK**

(Parameters: blastp, nr protein database, expect=20000, no filter, PAM30)

Other BLAST [web gateways](#)

All matches to this query

| Score | Mr(calc):   | Delta    | Sequence                       |
|-------|-------------|----------|--------------------------------|
| 51.7  | 1553.747406 | 0.000486 | <a href="#">YTHAANTVVYSSNK</a> |

Mascot: <http://www.matrixscience.com/>

# **MASCOT** Mascot Search Results

## Peptide View

MS/MS Fragmentation of **NLAIFDLR**

Found in **MIO\_HUMAN**, WD repeat-containing protein mio OS=Homo sapiens GN=MIOS PE=1 SV=2

Match to Query 12958: 960.539548 from(481.277050,2+) rtinseconds(3308) index(46871)

Title: Locus:1.1.1.2693.4

Data file 2011-11-10 - TFD - EP 3-2.mgf

Click mouse within plot area to zoom in by factor of two about that point

Or, Plot from  to  Da

Label all possible matches  Label matches used for scoring

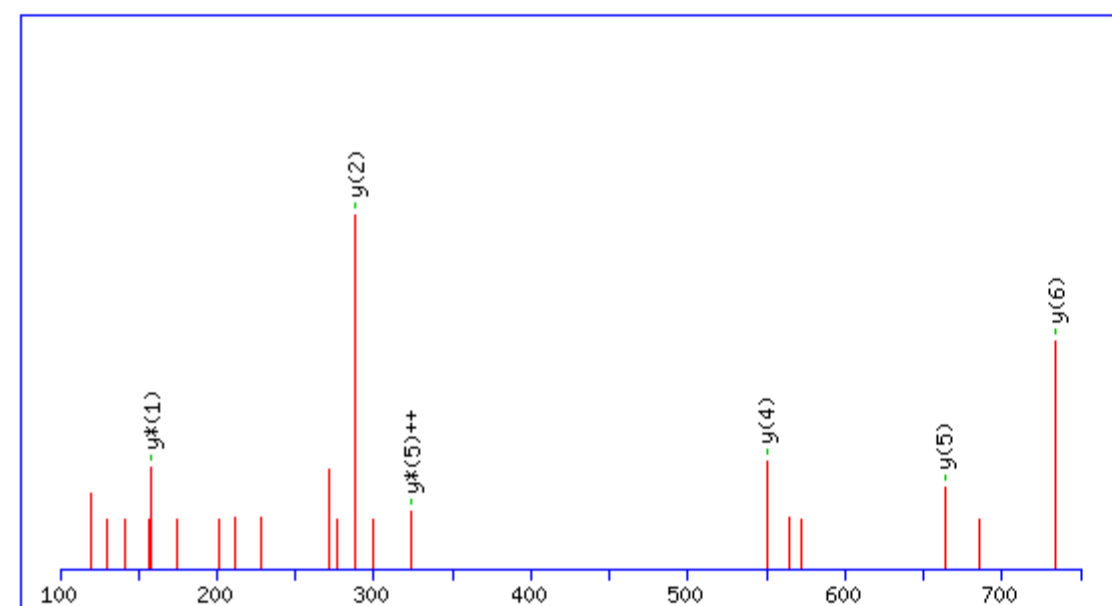

Monoisotopic mass of neutral peptide Mr(calc): 960.539246

Fixed modifications: Propionamide (C) (apply to specified residues or termini only)

Ions Score: 39 Expect: 0.0022

Matches : 6/70 fragment ions using 6 most intense peaks ([help](#))

| # | b          | b <sup>++</sup> | b <sup>*</sup> | b <sup>*++</sup> | b <sup>0</sup> | b <sup>0++</sup> | Seq. | y                 | y <sup>++</sup> | y <sup>*</sup>    | y <sup>*++</sup>  | y <sup>0</sup> | y <sup>0++</sup> | # |
|---|------------|-----------------|----------------|------------------|----------------|------------------|------|-------------------|-----------------|-------------------|-------------------|----------------|------------------|---|
| 1 | 115.050203 | 58.028740       | 98.023654      | 49.515465        |                |                  | N    |                   |                 |                   |                   |                |                  | 8 |
| 2 | 228.134267 | 114.570771      | 211.107718     | 106.057497       |                |                  | L    | 847.503615        | 424.255446      | 830.477066        | 415.742171        | 829.493050     | 415.250163       | 7 |
| 3 | 299.171381 | 150.089328      | 282.144832     | 141.576054       |                |                  | A    | <b>734.419551</b> | 367.713414      | 717.393002        | 359.200139        | 716.408986     | 358.708131       | 6 |
| 4 | 412.255445 | 206.631361      | 395.228896     | 198.118086       |                |                  | I    | <b>663.382437</b> | 332.194857      | 646.355888        | <b>323.681582</b> | 645.371872     | 323.189574       | 5 |
| 5 | 559.323859 | 280.165568      | 542.297310     | 271.652293       |                |                  | F    | <b>550.298373</b> | 275.652825      | 533.271824        | 267.139550        | 532.287808     | 266.647542       | 4 |
| 6 | 674.350802 | 337.679039      | 657.324253     | 329.165765       | 656.340237     | 328.673757       | D    | 403.229959        | 202.118617      | 386.203410        | 193.605343        | 385.219394     | 193.113335       | 3 |
| 7 | 787.434866 | 394.221071      | 770.408317     | 385.707797       | 769.424301     | 385.215789       | L    | <b>288.203016</b> | 144.605146      | 271.176467        | 136.091871        |                |                  | 2 |
| 8 |            |                 |                |                  |                |                  | R    | 175.118952        | 88.063114       | <b>158.092403</b> | 79.549839         |                |                  | 1 |

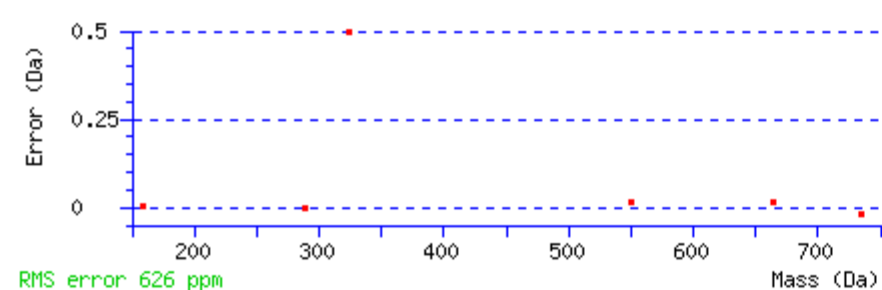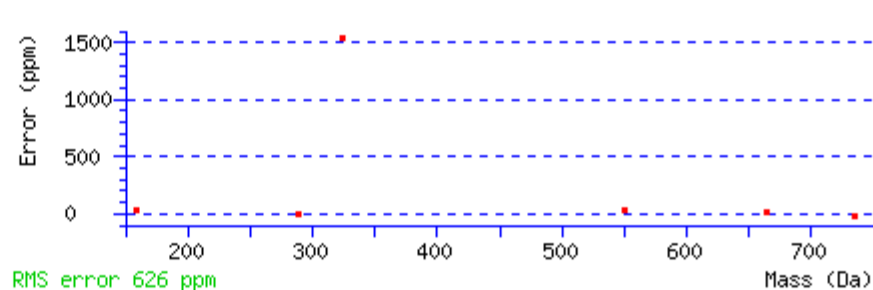

NCBI BLAST search of [NLAIFDLR](#)

(Parameters: blastp, nr protein database, expect=20000, no filter, PAM30)

Other BLAST [web gateways](#)

## All matches to this query

| Score | Mr(calc):  | Delta     | Sequence                 |
|-------|------------|-----------|--------------------------|
| 39.1  | 960.539246 | 0.000302  | <a href="#">NLAIFDLR</a> |
| 15.0  | 960.539246 | 0.000302  | <a href="#">NLLGLYPR</a> |
| 10.0  | 960.539246 | 0.000302  | <a href="#">APNIYLVR</a> |
| 6.9   | 960.539246 | 0.000302  | <a href="#">ALNIFVER</a> |
| 3.6   | 960.542603 | -0.003055 | <a href="#">AINIMKQK</a> |
| 0.5   | 960.542603 | -0.003055 | <a href="#">ELAMTKLR</a> |
| 0.1   | 960.542618 | -0.003070 | <a href="#">QMITALLR</a> |
| 0.1   | 960.539261 | 0.000287  | <a href="#">TPFTLNLR</a> |
| 0.1   | 960.539276 | 0.000272  | <a href="#">VTFQTPLR</a> |

Mascot: <http://www.matrixscience.com/>

# MASCOT Search Results

## Peptide View

MS/MS Fragmentation of **MLQVASQASR**

Found in **WBP2\_HUMAN**, WW domain-binding protein 2 OS=Homo sapiens GN=WBP2 PE=1 SV=1

Match to Query 23749: 1105.560728 from(553.787640,2+) rtinseconds(1121) index(5807)

Title: Locus:1.1.1.1769.38

Data file 2011-11-10 - TFD - EP 3-4.mgf

Click mouse within plot area to zoom in by factor of two about that point

Or, Plot from  to  Da

Label all possible matches  Label matches used for scoring

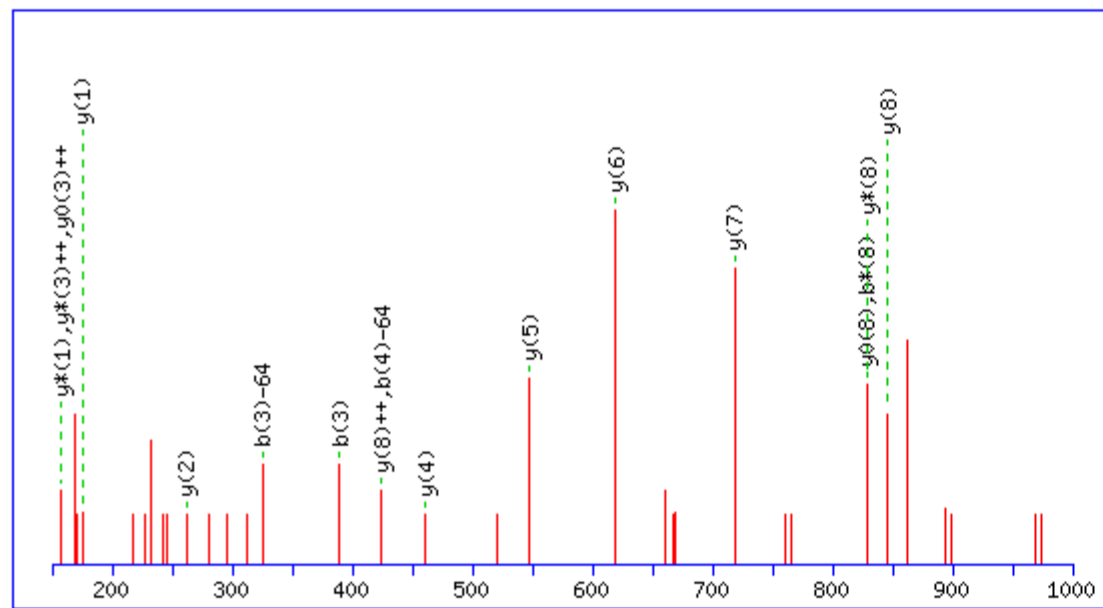

Monoisotopic mass of neutral peptide  $M_r(\text{calc})$ : 1105.554977

Fixed modifications: Propionamide (C) (apply to specified residues or termini only)

Variable modifications:

M1 : Oxidation (M), with neutral losses 63.998285 (shown in table), 0.000000

Ions Score: 41 Expect: 0.0011

Matches : 17/132 fragment ions using 27 most intense peaks [\(help\)](#)

| #  | b                 | b <sup>++</sup> | b <sup>*</sup> | b <sup>*++</sup> | b <sup>0</sup> | b <sup>0++</sup> | Seq. | y                 | y <sup>++</sup>   | y <sup>*</sup>    | y <sup>*++</sup>  | y <sup>0</sup>    | y <sup>0++</sup>  | #  |
|----|-------------------|-----------------|----------------|------------------|----------------|------------------|------|-------------------|-------------------|-------------------|-------------------|-------------------|-------------------|----|
| 1  | 84.044391         | 42.525833       |                |                  |                |                  | M    |                   |                   |                   |                   |                   |                   | 10 |
| 2  | 197.128455        | 99.067865       |                |                  |                |                  | L    | 959.526870        | 480.267073        | 942.500321        | 471.753799        | 941.516305        | 471.261791        | 9  |
| 3  | <b>325.187033</b> | 163.097154      | 308.160484     | 154.583880       |                |                  | Q    | <b>846.442806</b> | <b>423.725041</b> | <b>829.416257</b> | 415.211767        | <b>828.432241</b> | 414.719759        | 8  |
| 4  | <b>424.255447</b> | 212.631362      | 407.228898     | 204.118087       |                |                  | V    | <b>718.384228</b> | 359.695752        | 701.357679        | 351.182478        | 700.373663        | 350.690470        | 7  |
| 5  | 495.292561        | 248.149919      | 478.266012     | 239.636644       |                |                  | A    | <b>619.315814</b> | 310.161545        | 602.289265        | 301.648271        | 601.305249        | 301.156263        | 6  |
| 6  | 582.324589        | 291.665933      | 565.298040     | 283.152658       | 564.314024     | 282.660650       | S    | <b>548.278700</b> | 274.642988        | 531.252151        | 266.129714        | 530.268135        | 265.637706        | 5  |
| 7  | 710.383167        | 355.695222      | 693.356618     | 347.181947       | 692.372602     | 346.689939       | Q    | <b>461.246672</b> | 231.126974        | 444.220123        | 222.613700        | 443.236107        | 222.121692        | 4  |
| 8  | 781.420281        | 391.213779      | 764.393732     | 382.700504       | 763.409716     | 382.208496       | A    | 333.188094        | 167.097685        | 316.161545        | <b>158.584410</b> | 315.177529        | <b>158.092402</b> | 3  |
| 9  | 868.452309        | 434.729793      | 851.425760     | 426.216518       | 850.441744     | 425.724510       | S    | <b>262.150980</b> | 131.579128        | 245.124431        | 123.065854        | 244.140415        | 122.573846        | 2  |
| 10 |                   |                 |                |                  |                |                  | R    | <b>175.118952</b> | 88.063114         | <b>158.092403</b> | 79.549840         |                   |                   | 1  |

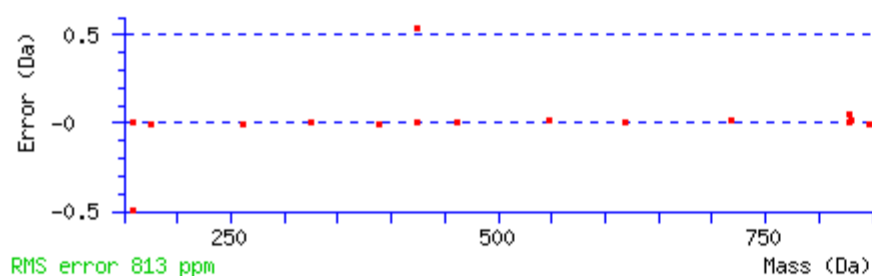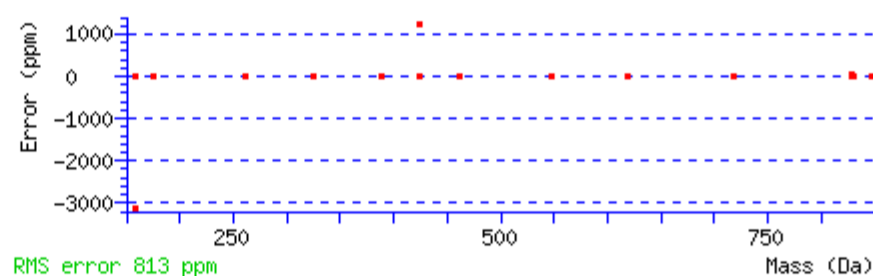

NCBI BLAST search of [MLQVASQASR](#)

(Parameters: blastp, nr protein database, expect=20000, no filter, PAM30)

Other BLAST [web gateways](#)

All matches to this query

| Score | $M_r(\text{calc})$ : | Delta    | Sequence                   |
|-------|----------------------|----------|----------------------------|
| 41.1  | 1105.554977          | 0.005751 | <a href="#">MLQVASQASR</a> |

Mascot: <http://www.matrixscience.com/>

# **MASCOT** Mascot Search Results

## Peptide View

MS/MS Fragmentation of **VLQELNK**

Found in **ZBT48\_HUMAN**, Zinc finger and BTB domain-containing protein 48 OS=Homo sapiens GN=ZBTB48 PE=1 SV=2

Match to Query 3101: 842.486448 from(422.250500,2+) rtinseconds(1187) index(7517)

Title: Locus:1.1.1.1865.12

Data file 2011-11-10 - TFD - EP 3-3.mgf

Click mouse within plot area to zoom in by factor of two about that point

Or, Plot from  to  Da

Label all possible matches  Label matches used for scoring

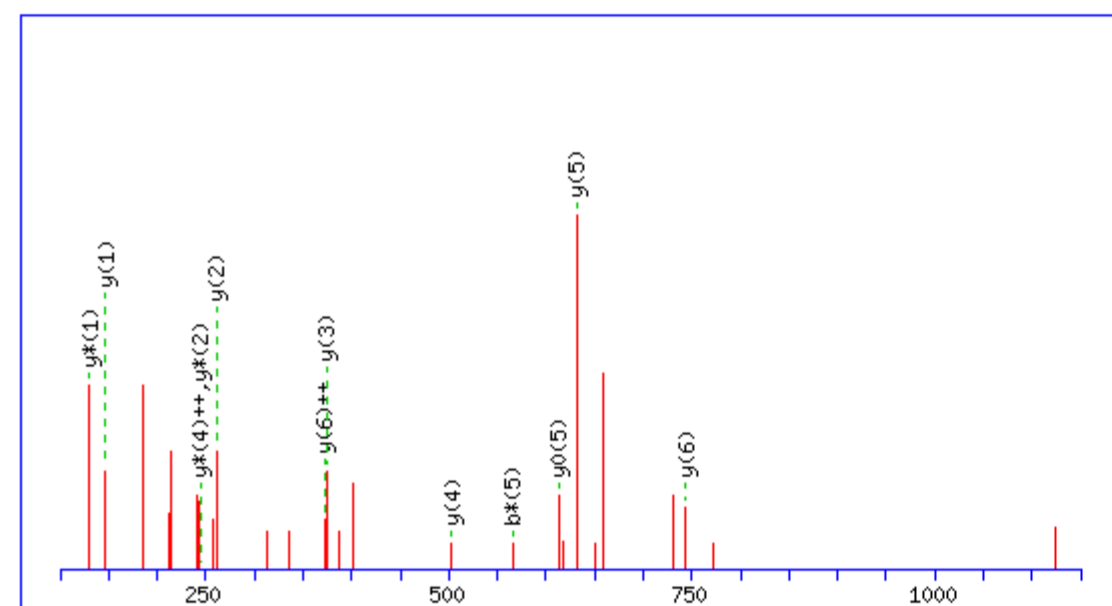

Monoisotopic mass of neutral peptide Mr(calc): 842.486145

Fixed modifications: Propionamide (C) (apply to specified residues or termini only)

Ions Score: 32 Expect: 0.0043

Matches : 12/56 fragment ions using 25 most intense peaks ([help](#))

| # | b          | b <sup>++</sup> | b <sup>*</sup> | b <sup>*++</sup> | b <sup>0</sup> | b <sup>0++</sup> | Seq. | y          | y <sup>++</sup> | y <sup>*</sup> | y <sup>*++</sup> | y <sup>0</sup> | y <sup>0++</sup> | # |
|---|------------|-----------------|----------------|------------------|----------------|------------------|------|------------|-----------------|----------------|------------------|----------------|------------------|---|
| 1 | 100.075690 | 50.541483       |                |                  |                |                  | V    |            |                 |                |                  |                |                  | 7 |
| 2 | 213.159754 | 107.083515      |                |                  |                |                  | L    | 744.425030 | 372.716153      | 727.398481     | 364.202879       | 726.414465     | 363.710871       | 6 |
| 3 | 341.218332 | 171.112804      | 324.191783     | 162.599529       |                |                  | Q    | 631.340966 | 316.174121      | 614.314417     | 307.660847       | 613.330401     | 307.168839       | 5 |
| 4 | 470.260925 | 235.634100      | 453.234376     | 227.120826       | 452.250360     | 226.628818       | E    | 503.282388 | 252.144832      | 486.255839     | 243.631557       | 485.271823     | 243.139549       | 4 |
| 5 | 583.344989 | 292.176133      | 566.318440     | 283.662858       | 565.334424     | 283.170850       | L    | 374.239795 | 187.623535      | 357.213246     | 179.110261       |                |                  | 3 |
| 6 | 697.387916 | 349.197596      | 680.361367     | 340.684322       | 679.377351     | 340.192314       | N    | 261.155731 | 131.081503      | 244.129182     | 122.568229       |                |                  | 2 |
| 7 |            |                 |                |                  |                |                  | K    | 147.112804 | 74.060040       | 130.086255     | 65.546765        |                |                  | 1 |

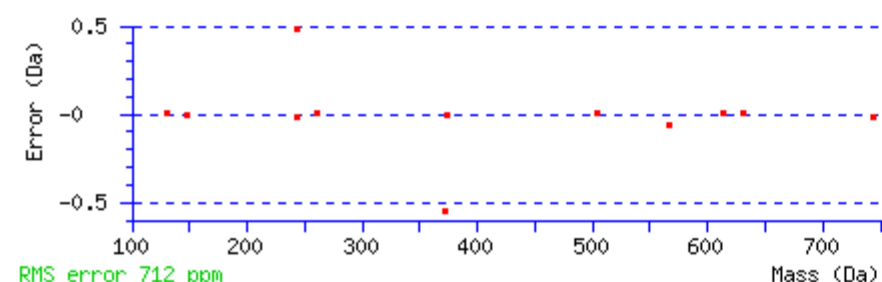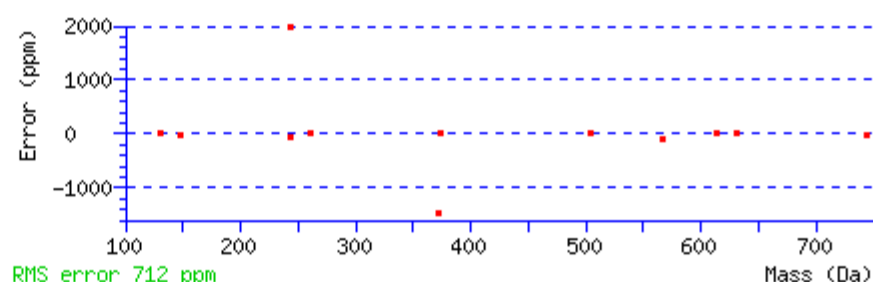

NCBI BLAST search of **VLQELNK**

(Parameters: blastp, nr protein database, expect=20000, no filter, PAM30)

Other BLAST [web gateways](#)

All matches to this query

| Score | Mr(calc):  | Delta    | Sequence                 |
|-------|------------|----------|--------------------------|
| 31.7  | 842.486145 | 0.000303 | <a href="#">VLQELNK</a>  |
| 21.8  | 842.486160 | 0.000288 | <a href="#">VLQDQLK</a>  |
| 21.0  | 842.486160 | 0.000288 | <a href="#">VIEQLGGK</a> |
| 18.9  | 842.486145 | 0.000303 | <a href="#">LAGLDINK</a> |
| 18.7  | 842.486145 | 0.000303 | <a href="#">ALLDGLNK</a> |
| 14.6  | 842.486145 | 0.000303 | <a href="#">AIVGNLEK</a> |
| 13.2  | 842.486160 | 0.000288 | <a href="#">APVGVEKK</a> |
| 11.5  | 842.486145 | 0.000303 | <a href="#">ILNQVEK</a>  |
| 8.1   | 842.486160 | 0.000288 | <a href="#">LPNSVLGK</a> |
| 7.9   | 842.486130 | 0.000318 | <a href="#">LLENNK</a>   |



# MASCOT SCIENCE Mascot Search Results

## Peptide View

MS/MS Fragmentation of **ATEPAADTGAQPK**

Found in **ZC3H4\_HUMAN**, Zinc finger CCCH domain-containing protein 4 OS=Homo sapiens GN=ZC3H4 PE=1 SV=3

Match to Query 588416: 1255.603008 from(628.808780,2+) rtinseconds(891) index(157726)

Title: Locus:1.1.1.1024.12

Data file C:\Program Files (x86)\Matrix Science\Mascot Daemon\mgf3 TFD - Epitel - R2\mascot\_daemon\_merge.mgf

Click mouse within plot area to zoom in by factor of two about that point

Or, Plot from  to  Da

Label all possible matches  Label matches used for scoring

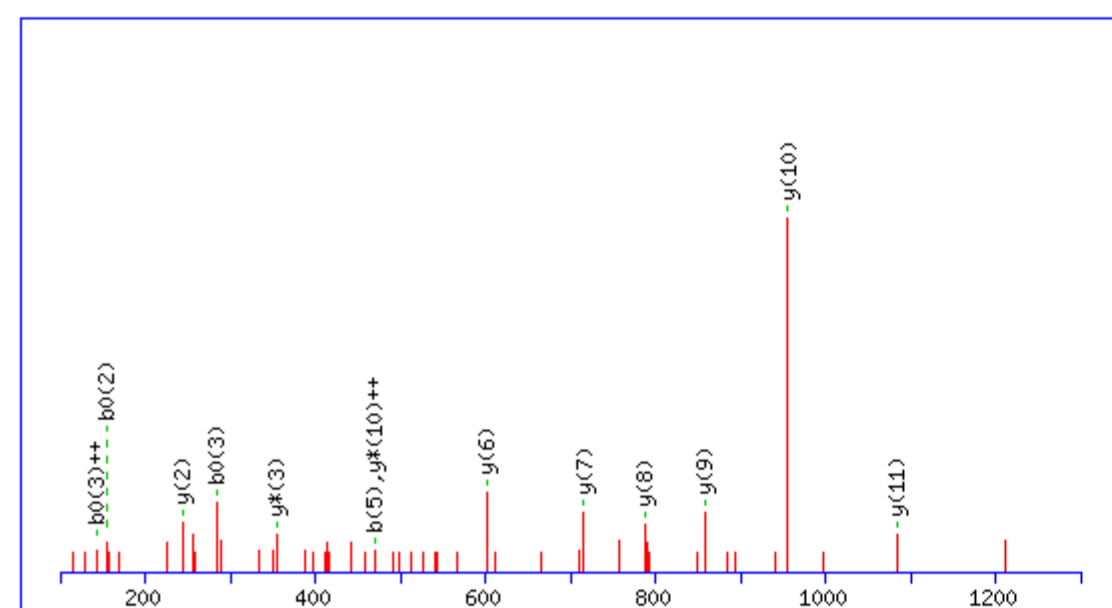

Monoisotopic mass of neutral peptide Mr(calc): 1255.604431

Fixed modifications: Carbamidomethyl (C) (apply to specified residues or termini only)

Ions Score: 40 Expect: 0.0005

Matches : 13/112 fragment ions using 20 most intense peaks ([help](#))

| #  | b           | b <sup>++</sup> | b <sup>*</sup> | b <sup>*++</sup> | b <sup>0</sup> | b <sup>0++</sup> | Seq. | y           | y <sup>++</sup> | y <sup>*</sup> | y <sup>*++</sup> | y <sup>0</sup> | y <sup>0++</sup> | #  |
|----|-------------|-----------------|----------------|------------------|----------------|------------------|------|-------------|-----------------|----------------|------------------|----------------|------------------|----|
| 1  | 72.044390   | 36.525833       |                |                  |                |                  | A    |             |                 |                |                  |                |                  | 13 |
| 2  | 173.092069  | 87.049672       |                |                  | 155.081504     | 78.044390        | T    | 1185.574610 | 593.290943      | 1168.548061    | 584.777669       | 1167.564045    | 584.285661       | 12 |
| 3  | 302.134662  | 151.570969      |                |                  | 284.124097     | 142.565687       | E    | 1084.526931 | 542.767104      | 1067.500382    | 534.253829       | 1066.516366    | 533.761821       | 11 |
| 4  | 399.187426  | 200.097351      |                |                  | 381.176861     | 191.092069       | P    | 955.484338  | 478.245807      | 938.457789     | 469.732533       | 937.473773     | 469.240525       | 10 |
| 5  | 470.224540  | 235.615908      |                |                  | 452.213975     | 226.610626       | A    | 858.431574  | 429.719425      | 841.405025     | 421.206151       | 840.421009     | 420.714143       | 9  |
| 6  | 541.261654  | 271.134465      |                |                  | 523.251089     | 262.129183       | A    | 787.394460  | 394.200868      | 770.367911     | 385.687594       | 769.383895     | 385.195586       | 8  |
| 7  | 656.288597  | 328.647937      |                |                  | 638.278032     | 319.642654       | D    | 716.357346  | 358.682311      | 699.330797     | 350.169037       | 698.346781     | 349.677029       | 7  |
| 8  | 757.336276  | 379.171776      |                |                  | 739.325711     | 370.166494       | T    | 601.330403  | 301.168840      | 584.303854     | 292.655565       | 583.319838     | 292.163557       | 6  |
| 9  | 814.357740  | 407.682508      |                |                  | 796.347175     | 398.677226       | G    | 500.282724  | 250.645000      | 483.256175     | 242.131726       |                |                  | 5  |
| 10 | 885.394854  | 443.201065      |                |                  | 867.384289     | 434.195783       | A    | 443.261260  | 222.134268      | 426.234711     | 213.620994       |                |                  | 4  |
| 11 | 1013.453432 | 507.230354      | 996.426883     | 498.717080       | 995.442867     | 498.225072       | Q    | 372.224146  | 186.615711      | 355.197597     | 178.102437       |                |                  | 3  |
| 12 | 1110.506196 | 555.756736      | 1093.479647    | 547.243462       | 1092.495631    | 546.751454       | P    | 244.165568  | 122.586422      | 227.139019     | 114.073148       |                |                  | 2  |
| 13 |             |                 |                |                  |                |                  | K    | 147.112804  | 74.060040       | 130.086255     | 65.546765        |                |                  | 1  |

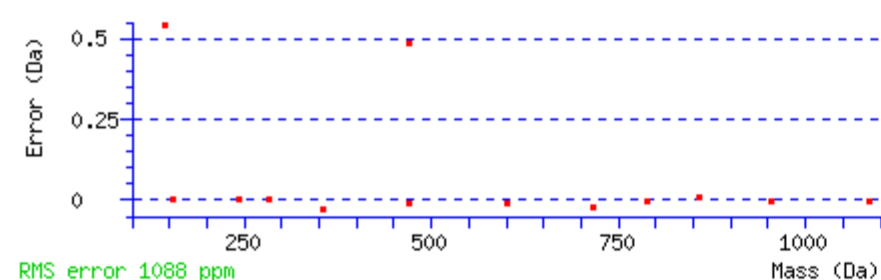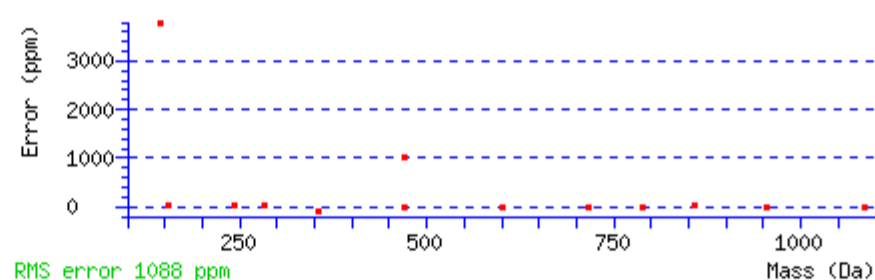

NCBI BLAST search of **ATEPAADTGAQPK**

(Parameters: blastp, nr protein database, expect=20000, no filter, PAM30)

Other BLAST [web gateways](#)

All matches to this query

| Score | Mr(calc):   | Delta     | Sequence                      |
|-------|-------------|-----------|-------------------------------|
| 39.5  | 1255.604431 | -0.001423 | <a href="#">ATEPAADTGAQPK</a> |
| 4.1   | 1255.593185 | 0.009823  | <a href="#">AAEVEPSSPEPK</a>  |
| 1.5   | 1255.604431 | -0.001423 | <a href="#">QPTANEVEQPK</a>   |

Mascot: <http://www.matrixscience.com/>

# Mascot Search Results

## Peptide View

MS/MS Fragmentation of **ETIDAVPNAIPGR**

Found in **ZN207\_HUMAN**, Zinc finger protein 207 OS=Homo sapiens GN=ZNF207 PE=1 SV=1

Match to Query 697435: 1351.713548 from(676.864050,2+) rtinseconds(2278) index(435090)

Title: Locus:1.1.1.1211.44

Data file C:\Program Files (x86)\Matrix Science\Mascot Daemon\mgf\3 TFD - Epitel - R2\mascot\_daemon\_merge.mgf

Click mouse within plot area to zoom in by factor of two about that point

Or, Plot from  to  Da

Label all possible matches  Label matches used for scoring

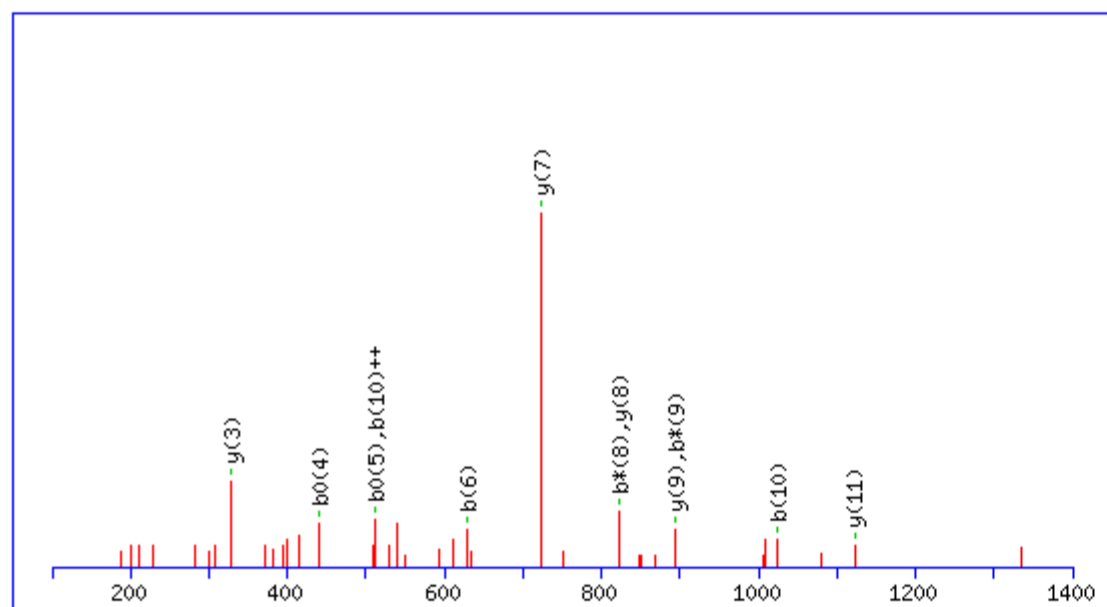

Monoisotopic mass of neutral peptide  $M_r(\text{calc})$ : 1351.709564

Fixed modifications: Carbamidomethyl (C) (apply to specified residues or termini only)

Ions Score: 43 Expect: 0.00051

Matches : 12/112 fragment ions using 11 most intense peaks [\(help\)](#)

| #  | b                  | b <sup>++</sup>   | b <sup>*</sup>    | b <sup>*++</sup> | b <sup>0</sup>    | b <sup>0++</sup> | Seq. | y                  | y <sup>++</sup> | y <sup>*</sup> | y <sup>*++</sup> | y <sup>0</sup> | y <sup>0++</sup> | #  |
|----|--------------------|-------------------|-------------------|------------------|-------------------|------------------|------|--------------------|-----------------|----------------|------------------|----------------|------------------|----|
| 1  | 130.049869         | 65.528572         |                   |                  | 112.039304        | 56.523290        | E    |                    |                 |                |                  |                |                  | 13 |
| 2  | 231.097548         | 116.052412        |                   |                  | 213.086983        | 107.047130       | T    | 1223.674263        | 612.340770      | 1206.647714    | 603.827495       | 1205.663698    | 603.335487       | 12 |
| 3  | 344.181612         | 172.594444        |                   |                  | 326.171047        | 163.589162       | I    | <b>1122.626584</b> | 561.816930      | 1105.600035    | 553.303655       | 1104.616019    | 552.811647       | 11 |
| 4  | 459.208555         | 230.107916        |                   |                  | <b>441.197990</b> | 221.102633       | D    | 1009.542520        | 505.274898      | 992.515971     | 496.761623       | 991.531955     | 496.269615       | 10 |
| 5  | 530.245669         | 265.626473        |                   |                  | <b>512.235104</b> | 256.621190       | A    | <b>894.515577</b>  | 447.761426      | 877.489028     | 439.248152       |                |                  | 9  |
| 6  | <b>629.314083</b>  | 315.160680        |                   |                  | 611.303518        | 306.155397       | V    | <b>823.478463</b>  | 412.242869      | 806.451914     | 403.729595       |                |                  | 8  |
| 7  | 726.366847         | 363.687062        |                   |                  | 708.356282        | 354.681779       | P    | <b>724.410049</b>  | 362.708663      | 707.383500     | 354.195388       |                |                  | 7  |
| 8  | 840.409774         | 420.708525        | <b>823.383225</b> | 412.195251       | 822.399209        | 411.703243       | N    | 627.357285         | 314.182280      | 610.330736     | 305.669006       |                |                  | 6  |
| 9  | 911.446888         | 456.227082        | <b>894.420339</b> | 447.713808       | 893.436323        | 447.221800       | A    | 513.314358         | 257.160817      | 496.287809     | 248.647542       |                |                  | 5  |
| 10 | <b>1024.530952</b> | <b>512.769114</b> | 1007.504403       | 504.255839       | 1006.520387       | 503.763831       | I    | 442.277244         | 221.642260      | 425.250695     | 213.128985       |                |                  | 4  |
| 11 | 1121.583716        | 561.295496        | 1104.557167       | 552.782222       | 1103.573151       | 552.290214       | P    | <b>329.193180</b>  | 165.100228      | 312.166631     | 156.586953       |                |                  | 3  |
| 12 | 1178.605180        | 589.806228        | 1161.578631       | 581.292954       | 1160.594615       | 580.800946       | G    | 232.140416         | 116.573846      | 215.113867     | 108.060571       |                |                  | 2  |
| 13 |                    |                   |                   |                  |                   |                  | R    | 175.118952         | 88.063114       | 158.092403     | 79.549839        |                |                  | 1  |

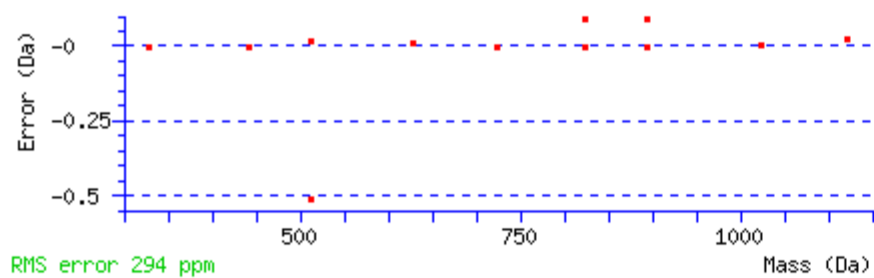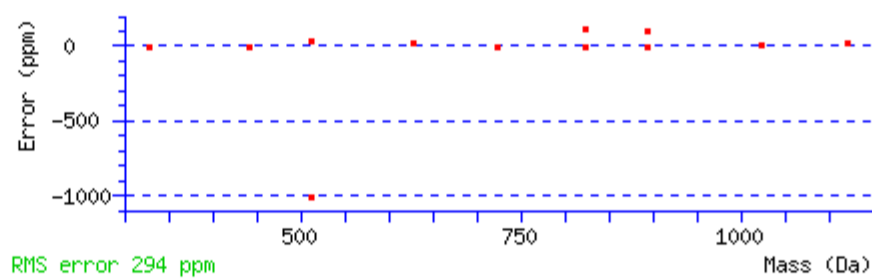

NCBI BLAST search of **ETIDAVPNAIPGR**

(Parameters: blastp, nr protein database, expect=20000, no filter, PAM30)

Other BLAST [web gateways](#)

All matches to this query

| Score | $M_r(\text{calc})$ : | Delta    | Sequence                      |
|-------|----------------------|----------|-------------------------------|
| 42.9  | 1351.709564          | 0.003984 | <a href="#">ETIDAVPNAIPGR</a> |

Mascot: <http://www.matrixscience.com/>

# MASCOT SEARCH RESULTS

## Peptide View

MS/MS Fragmentation of **WGSDLAR**

Found in **ZN213\_HUMAN**, Zinc finger protein 213 OS=Homo sapiens GN=ZNF213 PE=2 SV=2

Match to Query 609: 803.393488 from(402.704020,2+) rtinseconds(1496) index(6535)

Title: Locus:1.1.1.2027.2

Data file 2011-11-10 - TFD - EP 4-7.mgf

Click mouse within plot area to zoom in by factor of two about that point

Or, Plot from  to  Da

Label all possible matches  Label matches used for scoring

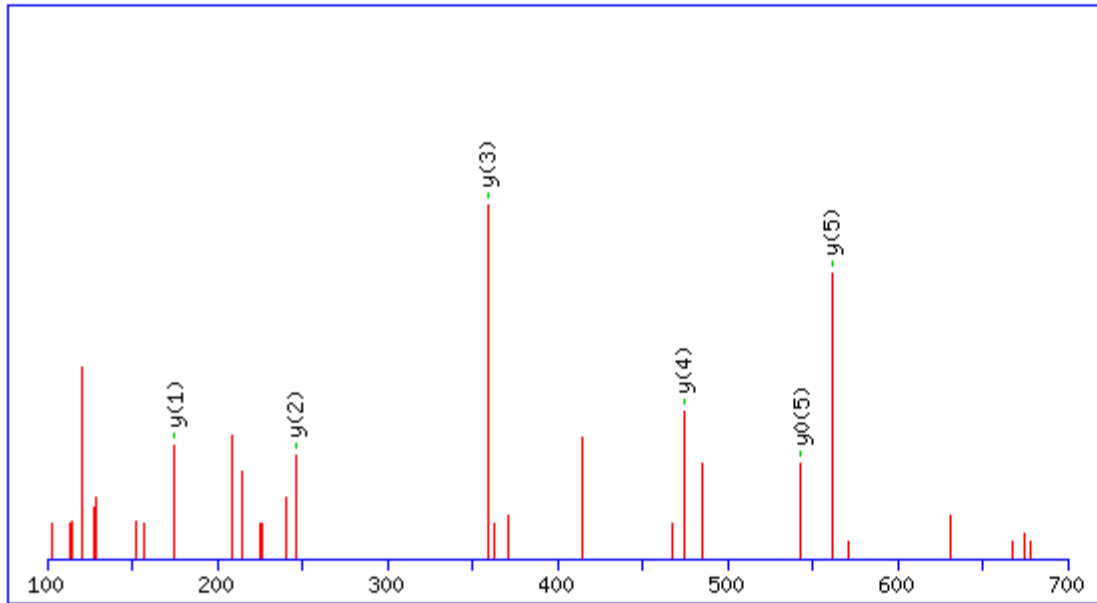

Monoisotopic mass of neutral peptide Mr(calc): 803.392593

Fixed modifications: Propionamide (C) (apply to specified residues or termini only)

Ions Score: 33 Expect: 0.005

Matches : 6/50 fragment ions using 12 most intense peaks [\(help\)](#)

| # | b          | b <sup>++</sup> | b <sup>0</sup> | b <sup>0++</sup> | Seq. | y                 | y <sup>++</sup> | y <sup>*</sup> | y <sup>*++</sup> | y <sup>0</sup>    | y <sup>0++</sup> | # |
|---|------------|-----------------|----------------|------------------|------|-------------------|-----------------|----------------|------------------|-------------------|------------------|---|
| 1 | 187.086589 | 94.046932       |                |                  | W    |                   |                 |                |                  |                   |                  | 7 |
| 2 | 244.108053 | 122.557665      |                |                  | G    | 618.320565        | 309.663921      | 601.294016     | 301.150646       | 600.310000        | 300.658638       | 6 |
| 3 | 331.140081 | 166.073679      | 313.129516     | 157.068396       | S    | <b>561.299101</b> | 281.153189      | 544.272552     | 272.639914       | <b>543.288536</b> | 272.147906       | 5 |
| 4 | 446.167024 | 223.587150      | 428.156459     | 214.581868       | D    | <b>474.267073</b> | 237.637175      | 457.240524     | 229.123900       | 456.256508        | 228.631892       | 4 |
| 5 | 559.251088 | 280.129182      | 541.240523     | 271.123900       | L    | <b>359.240130</b> | 180.123703      | 342.213581     | 171.610429       |                   |                  | 3 |
| 6 | 630.288202 | 315.647739      | 612.277637     | 306.642457       | A    | <b>246.156066</b> | 123.581671      | 229.129517     | 115.068397       |                   |                  | 2 |
| 7 |            |                 |                |                  | R    | <b>175.118952</b> | 88.063114       | 158.092403     | 79.549840        |                   |                  | 1 |

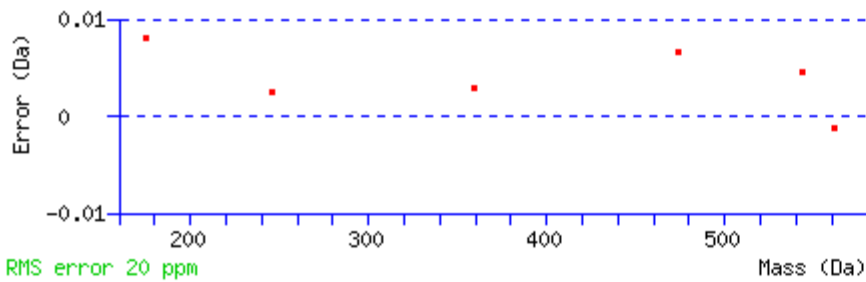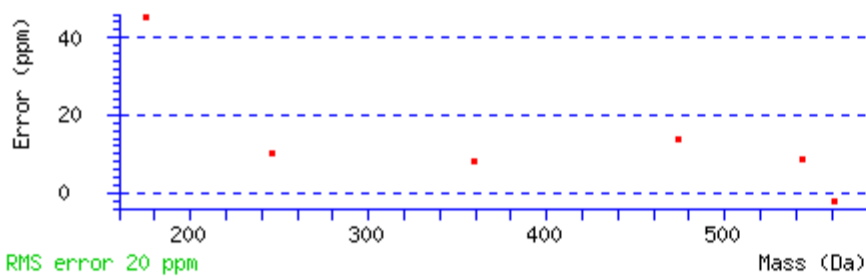

NCBI BLAST search of [WGSDLAR](#)

(Parameters: blastp, nr protein database, expect=20000, no filter, PAM30)

Other BLAST [web gateways](#)

## All matches to this query

| Score | Mr(calc):  | Delta     | Sequence                |
|-------|------------|-----------|-------------------------|
| 33.0  | 803.392593 | 0.000895  | <a href="#">WGSDLAR</a> |
| 8.6   | 803.395950 | -0.002462 | <a href="#">SMPNLAR</a> |
| 6.7   | 803.395966 | -0.002478 | <a href="#">QMAVPSR</a> |
| 6.6   | 803.395950 | -0.002462 | <a href="#">CAPASIR</a> |
| 6.6   | 803.395935 | -0.002447 | <a href="#">CEAALAR</a> |
| 6.6   | 803.395950 | -0.002462 | <a href="#">SMPNLAR</a> |
| 6.5   | 803.395950 | -0.002462 | <a href="#">CPSALSR</a> |
| 4.6   | 803.388565 | 0.004923  | <a href="#">RSPSGER</a> |
| 2.6   | 803.395966 | -0.002478 | <a href="#">QMAVPSR</a> |
| 0.8   | 803.392609 | 0.000879  | <a href="#">GWDLGTR</a> |

**Peptide View**

MS/MS Fragmentation of **ESVLTATSILNNPIVK**

Found in **ZN326\_HUMAN**, Zinc finger protein 326 OS=Homo sapiens GN=ZNF326 PE=1 SV=2

Match to Query 55282: 1697.958588 from(849.986570,2+) rtinseconds(3402) index(48050)

Title: Locus:1.1.1.2678.48

Data file 2011-11-12 - TFD - EP 6-2.mgf

Click mouse within plot area to zoom in by factor of two about that point

Or, Plot from  to  Da

Label all possible matches  Label matches used for scoring

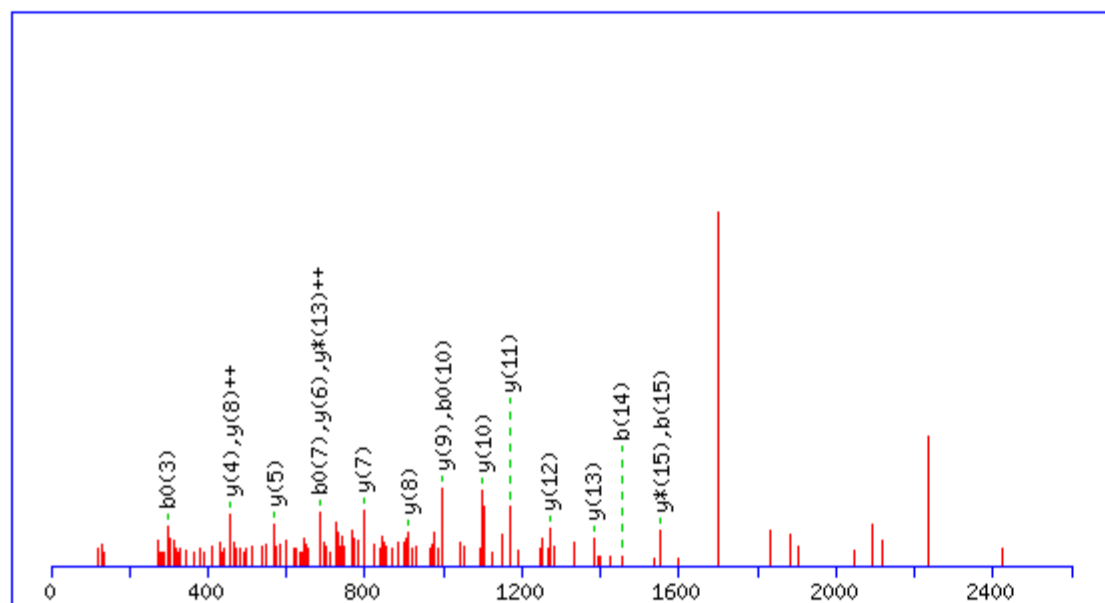

Monoisotopic mass of neutral peptide Mr(calc): 1697.956329

Fixed modifications: Propionamide (C) (apply to specified residues or termini only)

Ions Score: 92 Expect: 2.7e-009

Matches : 18/144 fragment ions using 15 most intense peaks ([help](#))

| #  | b           | b <sup>++</sup> | b <sup>*</sup> | b <sup>*++</sup> | b <sup>0</sup> | b <sup>0++</sup> | Seq. | y           | y <sup>++</sup> | y <sup>*</sup> | y <sup>*++</sup> | y <sup>0</sup> | y <sup>0++</sup> | #  |
|----|-------------|-----------------|----------------|------------------|----------------|------------------|------|-------------|-----------------|----------------|------------------|----------------|------------------|----|
| 1  | 130.049869  | 65.528572       |                |                  | 112.039304     | 56.523290        | E    |             |                 |                |                  |                |                  | 16 |
| 2  | 217.081897  | 109.044586      |                |                  | 199.071332     | 100.039304       | S    | 1569.921034 | 785.464155      | 1552.894485    | 776.950881       | 1551.910469    | 776.458873       | 15 |
| 3  | 316.150311  | 158.578793      |                |                  | 298.139746     | 149.573511       | V    | 1482.889006 | 741.948141      | 1465.862457    | 733.434867       | 1464.878441    | 732.942859       | 14 |
| 4  | 429.234375  | 215.120826      |                |                  | 411.223810     | 206.115543       | L    | 1383.820592 | 692.413934      | 1366.794043    | 683.900660       | 1365.810027    | 683.408652       | 13 |
| 5  | 530.282054  | 265.644665      |                |                  | 512.271489     | 256.639383       | T    | 1270.736528 | 635.871902      | 1253.709979    | 627.358628       | 1252.725963    | 626.866620       | 12 |
| 6  | 601.319168  | 301.163222      |                |                  | 583.308603     | 292.157940       | A    | 1169.688849 | 585.348063      | 1152.662300    | 576.834788       | 1151.678284    | 576.342780       | 11 |
| 7  | 702.366847  | 351.687062      |                |                  | 684.356282     | 342.681779       | T    | 1098.651735 | 549.829506      | 1081.625186    | 541.316231       | 1080.641170    | 540.824223       | 10 |
| 8  | 789.398875  | 395.203076      |                |                  | 771.388310     | 386.197793       | S    | 997.604056  | 499.305666      | 980.577507     | 490.792392       | 979.593491     | 490.300384       | 9  |
| 9  | 902.482939  | 451.745108      |                |                  | 884.472374     | 442.739825       | I    | 910.572028  | 455.789652      | 893.545479     | 447.276378       |                |                  | 8  |
| 10 | 1015.567003 | 508.287140      |                |                  | 997.556438     | 499.281857       | L    | 797.487964  | 399.247620      | 780.461415     | 390.734346       |                |                  | 7  |
| 11 | 1129.609930 | 565.308603      | 1112.583381    | 556.795329       | 1111.599365    | 556.303321       | N    | 684.403900  | 342.705588      | 667.377351     | 334.192314       |                |                  | 6  |
| 12 | 1243.652857 | 622.330067      | 1226.626308    | 613.816792       | 1225.642292    | 613.324784       | N    | 570.360973  | 285.684125      | 553.334424     | 277.170850       |                |                  | 5  |
| 13 | 1340.705621 | 670.856449      | 1323.679072    | 662.343174       | 1322.695056    | 661.851166       | P    | 456.318046  | 228.662661      | 439.291497     | 220.149386       |                |                  | 4  |
| 14 | 1453.789685 | 727.398481      | 1436.763136    | 718.885206       | 1435.779120    | 718.393198       | I    | 359.265282  | 180.136279      | 342.238733     | 171.623004       |                |                  | 3  |
| 15 | 1552.858099 | 776.932688      | 1535.831550    | 768.419413       | 1534.847534    | 767.927405       | V    | 246.181218  | 123.594247      | 229.154669     | 115.080973       |                |                  | 2  |
| 16 |             |                 |                |                  |                |                  | K    | 147.112804  | 74.060040       | 130.086255     | 65.546765        |                |                  | 1  |

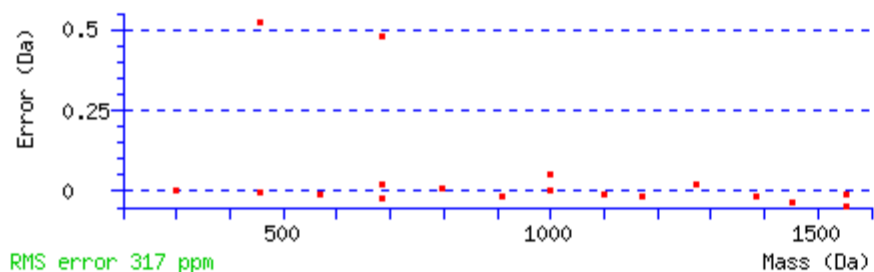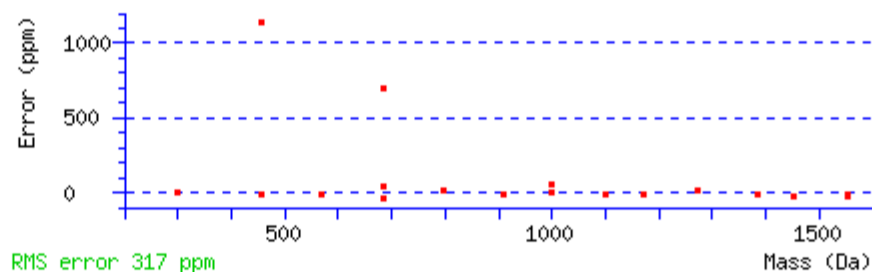

NCBI BLAST search of [ESVLTATSILNNPIVK](#)

(Parameters: blastp, nr protein database, expect=20000, no filter, PAM30)

Other BLAST [web gateways](#)

**All matches to this query**

| Score | Mr(calc):   | Delta    | Sequence                         |
|-------|-------------|----------|----------------------------------|
| 92.2  | 1697.956329 | 0.002259 | <a href="#">ESVLTATSILNNPIVK</a> |

# MASCOT Search Results

## Peptide View

MS/MS Fragmentation of **STYADEELVIK**

Found in **ZN398\_HUMAN**, Zinc finger protein 398 OS=Homo sapiens GN=ZNF398 PE=2 SV=1

Match to Query 30883: 1266.633462 from(423.218430,3+) rtinseconds(2075) index(24305)

Title: Locus:1.1.1.2160.5

Data file 2011-11-12 - TFD - EP 6-3.mgf

Click mouse within plot area to zoom in by factor of two about that point

Or, Plot from  to  Da

Label all possible matches  Label matches used for scoring

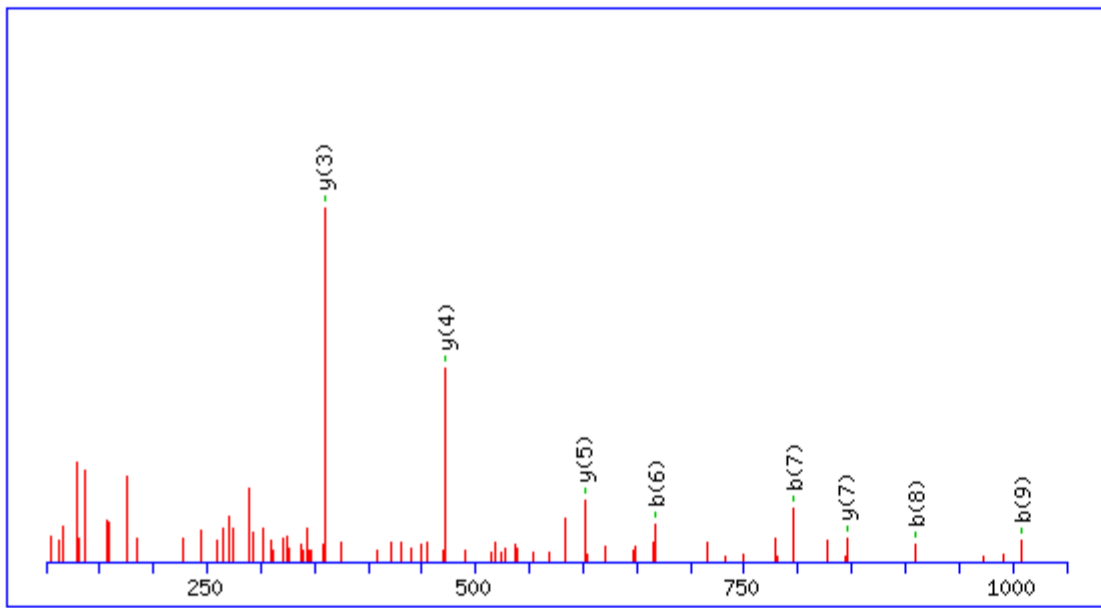

Monoisotopic mass of neutral peptide Mr(calc): 1266.634323

Fixed modifications: Propionamide (C) (apply to specified residues or termini only)

Ions Score: 33 Expect: 0.0054

Matches : 8/92 fragment ions using 10 most intense peaks [\(help\)](#)

| #  | b                  | b <sup>++</sup> | b <sup>0</sup> | b <sup>0++</sup> | Seq. | y                 | y <sup>++</sup> | y*          | y <sup>++</sup> | y <sup>0</sup> | y <sup>0++</sup> | #  |
|----|--------------------|-----------------|----------------|------------------|------|-------------------|-----------------|-------------|-----------------|----------------|------------------|----|
| 1  | 88.039304          | 44.523290       | 70.028739      | 35.518008        | S    |                   |                 |             |                 |                |                  | 11 |
| 2  | 189.086983         | 95.047129       | 171.076418     | 86.041847        | T    | 1180.609597       | 590.808436      | 1163.583048 | 582.295162      | 1162.599032    | 581.803154       | 10 |
| 3  | 352.150312         | 176.578794      | 334.139747     | 167.573512       | Y    | 1079.561918       | 540.284597      | 1062.535369 | 531.771323      | 1061.551353    | 531.279315       | 9  |
| 4  | 423.187426         | 212.097351      | 405.176861     | 203.092069       | A    | 916.498589        | 458.752933      | 899.472040  | 450.239658      | 898.488024     | 449.747650       | 8  |
| 5  | 538.214369         | 269.610823      | 520.203804     | 260.605540       | D    | <b>845.461475</b> | 423.234376      | 828.434926  | 414.721101      | 827.450910     | 414.229093       | 7  |
| 6  | <b>667.256962</b>  | 334.132119      | 649.246397     | 325.126837       | E    | 730.434532        | 365.720904      | 713.407983  | 357.207630      | 712.423967     | 356.715622       | 6  |
| 7  | <b>796.299555</b>  | 398.653416      | 778.288990     | 389.648133       | E    | <b>601.391939</b> | 301.199608      | 584.365390  | 292.686333      | 583.381374     | 292.194325       | 5  |
| 8  | <b>909.383619</b>  | 455.195448      | 891.373054     | 446.190165       | L    | <b>472.349346</b> | 236.678311      | 455.322797  | 228.165036      |                |                  | 4  |
| 9  | <b>1008.452033</b> | 504.729655      | 990.441468     | 495.724372       | V    | <b>359.265282</b> | 180.136279      | 342.238733  | 171.623004      |                |                  | 3  |
| 10 | 1121.536097        | 561.271686      | 1103.525532    | 552.266404       | I    | 260.196868        | 130.602072      | 243.170319  | 122.088797      |                |                  | 2  |
| 11 |                    |                 |                |                  | K    | 147.112804        | 74.060040       | 130.086255  | 65.546765       |                |                  | 1  |

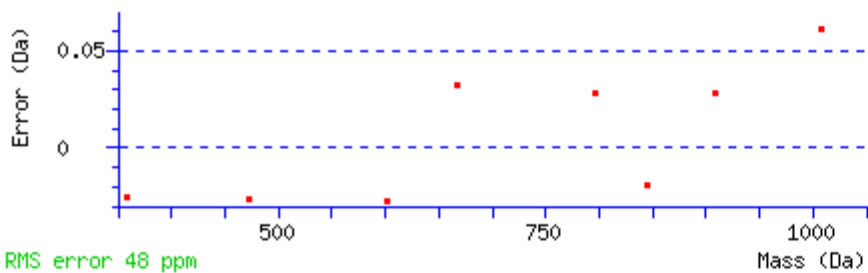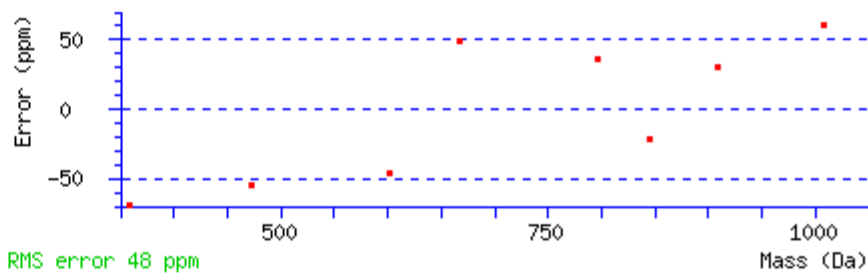

NCBI BLAST search of **STYADEELVIK**

(Parameters: blastp, nr protein database, expect=20000, no filter, PAM30)

Other BLAST [web gateways](#)

## All matches to this query

| Score | Mr(calc):   | Delta     | Sequence                      |
|-------|-------------|-----------|-------------------------------|
| 33.2  | 1266.634323 | -0.000861 | <a href="#">STYADEELVIK</a>   |
| 9.9   | 1266.627823 | 0.005639  | <a href="#">YMGDLSGGQVLK</a>  |
| 7.2   | 1266.642899 | -0.009437 | <a href="#">TGQGPGSRAPSPR</a> |
| 6.6   | 1266.631668 | 0.001794  | <a href="#">GATPPAPPRAPR</a>  |
| 5.0   | 1266.631668 | 0.001794  | <a href="#">LGHNEIGDTGVR</a>  |
| 4.8   | 1266.631653 | 0.001809  | <a href="#">APVRGDEAPPAR</a>  |
| 4.5   | 1266.639053 | -0.005591 | <a href="#">TLGSKCGDFLR</a>   |
| 4.2   | 1266.642868 | -0.009406 | <a href="#">RNSNSNPPLPR</a>   |
| 3.3   | 1266.642868 | -0.009406 | <a href="#">SAEKRPHPSPR</a>   |
| 3.2   | 1266.625107 | 0.008355  | <a href="#">RNQHMPLESR</a>    |

# MASCOT Search Results

## Peptide View

MS/MS Fragmentation of **AEGPSSTPSSAAGPRPPR**

Found in **ZN580\_HUMAN**, Zinc finger protein 580 OS=Homo sapiens GN=ZNF580 PE=2 SV=1

Match to Query 972389: 1736.848308 from(869.431430,2+) rtinseconds(2085) index(513560)

Title: Locus:1.1.1.1127.45

Data file C:\Program Files (x86)\Matrix Science\Mascot Daemon\mgf3 TFD - Epitel - R2\mascot\_daemon\_merge.mgf

Click mouse within plot area to zoom in by factor of two about that point

Or, Plot from  to  Da

Label all possible matches  Label matches used for scoring

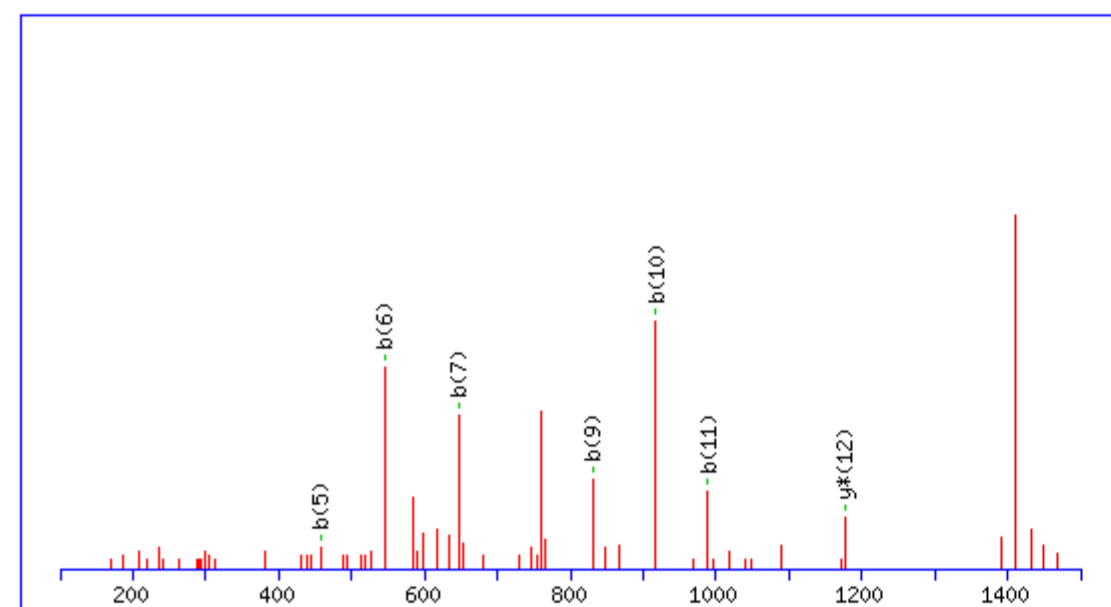

Monoisotopic mass of neutral peptide Mr(calc): 1736.844162

Fixed modifications: Carbamidomethyl (C) (apply to specified residues or termini only)

Variable modifications:

P4 : Oxidation (P)

Ions Score: 31 Expect: 0.0044

Matches : 7/158 fragment ions using 12 most intense peaks [\(help\)](#)

| #  | b                 | b <sup>++</sup> | b <sup>+</sup> | b <sup>+++</sup> | b <sup>0</sup> | b <sup>0++</sup> | Seq. | y           | y <sup>++</sup> | y <sup>+</sup>     | y <sup>+++</sup> | y <sup>0</sup> | y <sup>0++</sup> | #  |
|----|-------------------|-----------------|----------------|------------------|----------------|------------------|------|-------------|-----------------|--------------------|------------------|----------------|------------------|----|
| 1  | 72.044390         | 36.525833       |                |                  |                |                  | A    |             |                 |                    |                  |                |                  | 18 |
| 2  | 201.086983        | 101.047130      |                |                  | 183.076418     | 92.041847        | E    | 1666.814338 | 833.910807      | 1649.787789        | 825.397533       | 1648.803773    | 824.905524       | 17 |
| 3  | 258.108447        | 129.557862      |                |                  | 240.097882     | 120.552579       | G    | 1537.771745 | 769.389510      | 1520.745196        | 760.876236       | 1519.761180    | 760.384228       | 16 |
| 4  | 371.156126        | 186.081701      |                |                  | 353.145561     | 177.076419       | P    | 1480.750281 | 740.878778      | 1463.723732        | 732.365504       | 1462.739716    | 731.873496       | 15 |
| 5  | <b>458.188154</b> | 229.597715      |                |                  | 440.177589     | 220.592433       | S    | 1367.702602 | 684.354939      | 1350.676053        | 675.841664       | 1349.692037    | 675.349656       | 14 |
| 6  | <b>545.220182</b> | 273.113729      |                |                  | 527.209617     | 264.108447       | S    | 1280.670574 | 640.838925      | 1263.644025        | 632.325651       | 1262.660009    | 631.833643       | 13 |
| 7  | <b>646.267861</b> | 323.637569      |                |                  | 628.257296     | 314.632286       | T    | 1193.638546 | 597.322911      | <b>1176.611997</b> | 588.809637       | 1175.627981    | 588.317628       | 12 |
| 8  | 743.320625        | 372.163951      |                |                  | 725.310060     | 363.158668       | P    | 1092.590867 | 546.799071      | 1075.564318        | 538.285797       | 1074.580302    | 537.793789       | 11 |
| 9  | <b>830.352653</b> | 415.679965      |                |                  | 812.342088     | 406.674682       | S    | 995.538103  | 498.272689      | 978.511554         | 489.759415       | 977.527538     | 489.267407       | 10 |
| 10 | <b>917.384681</b> | 459.195979      |                |                  | 899.374116     | 450.190696       | S    | 908.506075  | 454.756675      | 891.479526         | 446.243401       | 890.495510     | 445.751393       | 9  |
| 11 | <b>988.421795</b> | 494.714536      |                |                  | 970.411230     | 485.709253       | A    | 821.474047  | 411.240661      | 804.447498         | 402.727387       |                |                  | 8  |
| 12 | 1059.458909       | 530.233093      |                |                  | 1041.448344    | 521.227810       | A    | 750.436933  | 375.722105      | 733.410384         | 367.208830       |                |                  | 7  |
| 13 | 1116.480373       | 558.743824      |                |                  | 1098.469808    | 549.738542       | G    | 679.399819  | 340.203548      | 662.373270         | 331.690273       |                |                  | 6  |
| 14 | 1213.533137       | 607.270206      |                |                  | 1195.522572    | 598.264924       | P    | 622.378355  | 311.692816      | 605.351806         | 303.179541       |                |                  | 5  |
| 15 | 1369.634248       | 685.320762      | 1352.607699    | 676.807487       | 1351.623683    | 676.315479       | R    | 525.325591  | 263.166434      | 508.299042         | 254.653159       |                |                  | 4  |
| 16 | 1466.687012       | 733.847144      | 1449.660463    | 725.333869       | 1448.676447    | 724.841861       | P    | 369.224480  | 185.115878      | 352.197931         | 176.602603       |                |                  | 3  |
| 17 | 1563.739776       | 782.373526      | 1546.713227    | 773.860252       | 1545.729211    | 773.368243       | P    | 272.171716  | 136.589496      | 255.145167         | 128.076221       |                |                  | 2  |
| 18 |                   |                 |                |                  |                |                  | R    | 175.118952  | 88.063114       | 158.092403         | 79.549839        |                |                  | 1  |

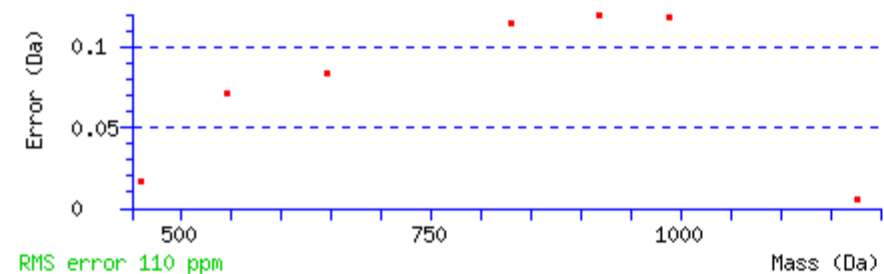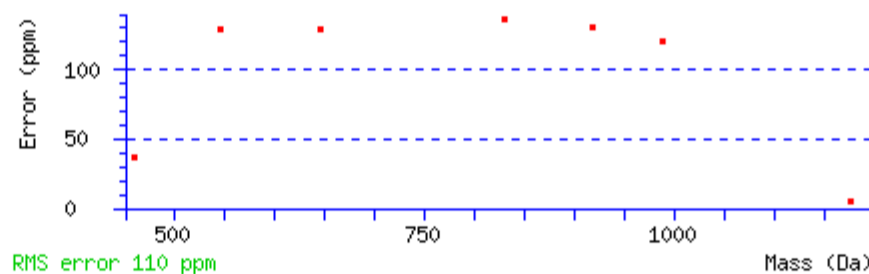

NCBI BLAST search of **AEGPSSTPSSAAGPRPPR**

(Parameters: blastp, nr protein database, expect=20000, no filter, PAM30)

Other BLAST [web gateways](#)

### All matches to this query

| Score | Mr(calc):   | Delta    | Sequence                           |
|-------|-------------|----------|------------------------------------|
| 31.3  | 1736.844162 | 0.004146 | <a href="#">AEGPSSTPSSAAGPRPPR</a> |
| 6.1   | 1736.832932 | 0.015376 | <a href="#">SSEKPTGLWSTASSQR</a>   |
| 1.4   | 1736.844162 | 0.004146 | <a href="#">AEGPSSTPSSAAGPRPPR</a> |

Mascot: <http://www.matrixscience.com/>

# MASCOT Search Results

## Peptide View

MS/MS Fragmentation of **QTSELTGK**

Found in **ZN624\_HUMAN**, Zinc finger protein 624 OS=Homo sapiens GN=ZNF624 PE=2 SV=3

Match to Query 14035: 975.520668 from(488.767610,2+) rtinseconds(2128) index(24254)

Title: Locus:1.1.1.2159.9

Data file 2011-11-10 - TFD - EP 4-1.mgf

Click mouse within plot area to zoom in by factor of two about that point

Or, Plot from  to  Da

Label all possible matches  Label matches used for scoring

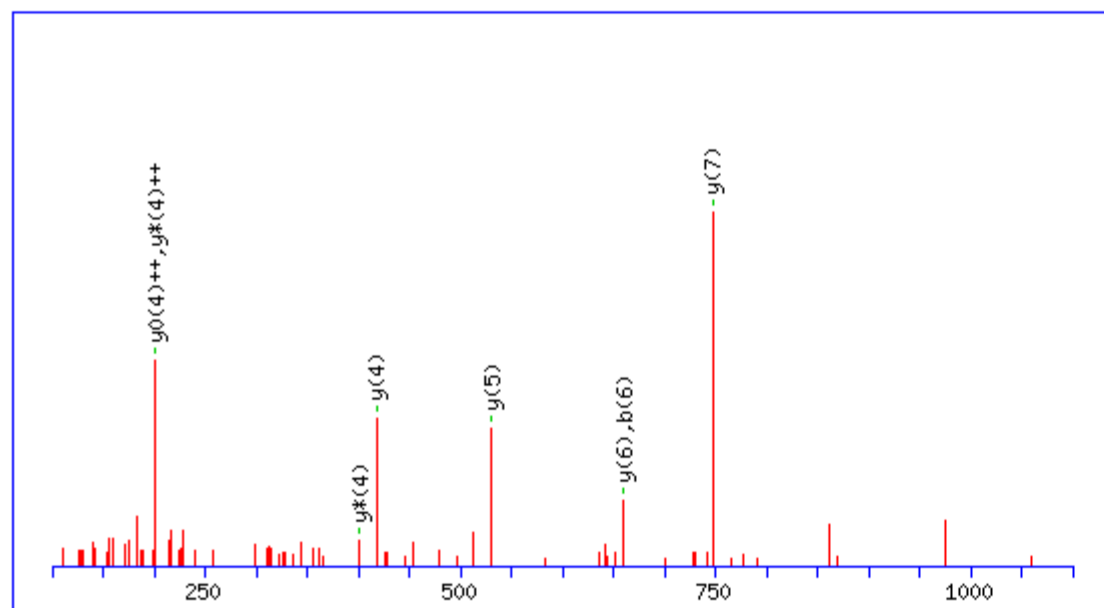

Monoisotopic mass of neutral peptide Mr(calc): 975.523666

Fixed modifications: Propionamide (C) (apply to specified residues or termini only)

Ions Score: 31 Expect: 0.0093

Matches : 8/88 fragment ions using 8 most intense peaks [\(help\)](#)

| # | b                 | b <sup>++</sup> | b <sup>*</sup> | b <sup>*++</sup> | b <sup>0</sup> | b <sup>0++</sup> | Seq. | y                 | y <sup>++</sup> | y <sup>*</sup>    | y <sup>*++</sup>  | y <sup>0</sup> | y <sup>0++</sup>  | # |
|---|-------------------|-----------------|----------------|------------------|----------------|------------------|------|-------------------|-----------------|-------------------|-------------------|----------------|-------------------|---|
| 1 | 129.065854        | 65.036565       | 112.039305     | 56.523291        |                |                  | Q    |                   |                 |                   |                   |                |                   | 9 |
| 2 | 230.113533        | 115.560405      | 213.086984     | 107.047130       | 212.102968     | 106.555122       | T    | 848.472375        | 424.739826      | 831.445826        | 416.226551        | 830.461810     | 415.734543        | 8 |
| 3 | 317.145561        | 159.076418      | 300.119012     | 150.563144       | 299.134996     | 150.071136       | S    | <b>747.424696</b> | 374.215986      | 730.398147        | 365.702712        | 729.414131     | 365.210704        | 7 |
| 4 | 446.188154        | 223.597715      | 429.161605     | 215.084441       | 428.177589     | 214.592433       | E    | <b>660.392668</b> | 330.699972      | 643.366119        | 322.186698        | 642.382103     | 321.694690        | 6 |
| 5 | 559.272218        | 280.139747      | 542.245669     | 271.626473       | 541.261653     | 271.134465       | L    | <b>531.350075</b> | 266.178676      | 514.323526        | 257.665401        | 513.339510     | 257.173393        | 5 |
| 6 | <b>660.319897</b> | 330.663587      | 643.293348     | 322.150312       | 642.309332     | 321.658304       | T    | <b>418.266011</b> | 209.636644      | <b>401.239462</b> | <b>201.123369</b> | 400.255446     | <b>200.631361</b> | 4 |
| 7 | 773.403961        | 387.205619      | 756.377412     | 378.692344       | 755.393396     | 378.200336       | L    | 317.218332        | 159.112804      | 300.191783        | 150.599530        |                |                   | 3 |
| 8 | 830.425425        | 415.716351      | 813.398876     | 407.203076       | 812.414860     | 406.711068       | G    | 204.134268        | 102.570772      | 187.107719        | 94.057498         |                |                   | 2 |
| 9 |                   |                 |                |                  |                |                  | K    | 147.112804        | 74.060040       | 130.086255        | 65.546765         |                |                   | 1 |

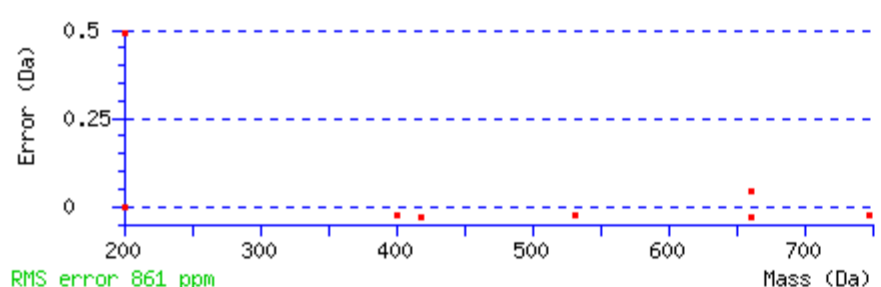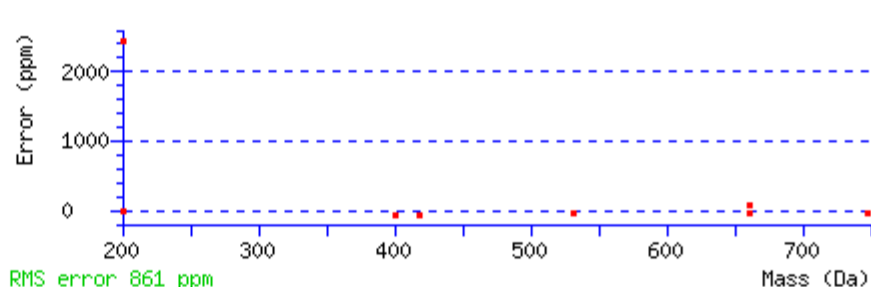

NCBI BLAST search of **QTSELTGK**

(Parameters: blastp, nr protein database, expect=20000, no filter, PAM30)

Other BLAST [web gateways](#)

## All matches to this query

| Score | Mr(calc):  | Delta     | Sequence                   |
|-------|------------|-----------|----------------------------|
| 30.9  | 975.523666 | -0.002998 | <a href="#">QTSELTGK</a>   |
| 8.8   | 975.513763 | 0.006905  | <a href="#">VAKFPENR</a>   |
| 5.8   | 975.525009 | -0.004341 | <a href="#">GPPPPRSR</a>   |
| 2.1   | 975.523666 | -0.002998 | <a href="#">SSTLGPSALK</a> |

# **Mascot Search Results**

## Peptide View

MS/MS Fragmentation of **LLEAKQEK**

Found in **ZNF770\_HUMAN**, Zinc finger protein 770 OS=Homo sapiens GN=ZNF770 PE=2 SV=1

Match to Query 12835: 957.553008 from(479.783780,2+) rtinseconds(1612) index(15185)

Title: Locus:1.1.1.1957.16

Data file 2011-11-10 - TFD - EP 3-4.mgf

Click mouse within plot area to zoom in by factor of two about that point

Or, Plot from  to  Da

Label all possible matches  Label matches used for scoring

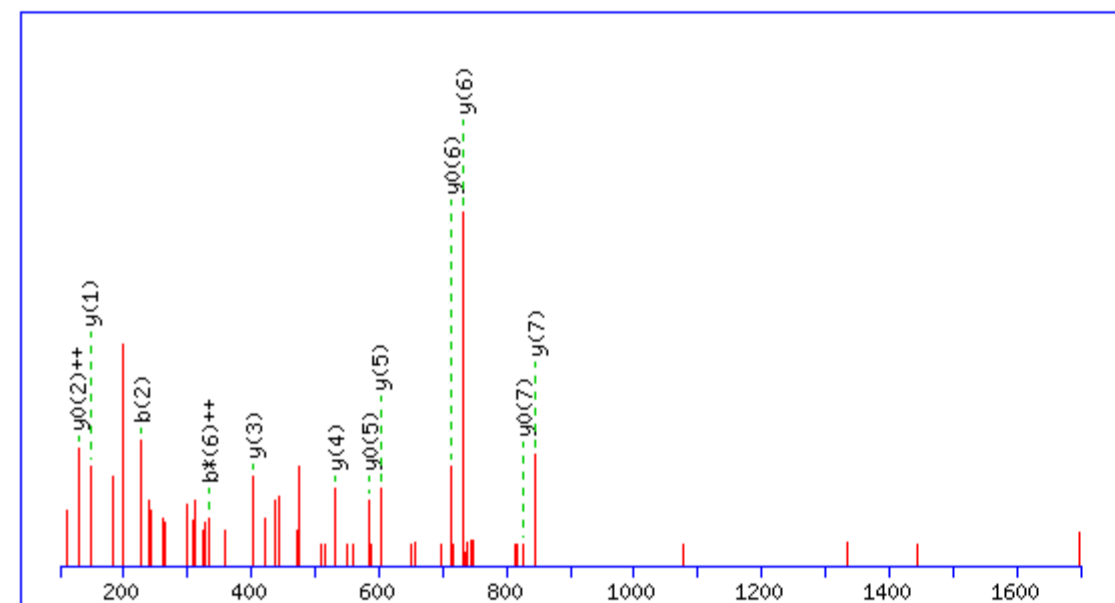

Monoisotopic mass of neutral peptide Mr(calc): 957.549454

Fixed modifications: Propionamide (C) (apply to specified residues or termini only)

Ions Score: 32 Expect: 0.0074

Matches : 12/70 fragment ions using 24 most intense peaks ([help](#))

| # | b                 | b <sup>++</sup> | b <sup>*</sup> | b <sup>*++</sup>  | b <sup>0</sup> | b <sup>0++</sup> | Seq. | y                 | y <sup>++</sup> | y <sup>*</sup> | y <sup>*++</sup> | y <sup>0</sup>    | y <sup>0++</sup>  | # |
|---|-------------------|-----------------|----------------|-------------------|----------------|------------------|------|-------------------|-----------------|----------------|------------------|-------------------|-------------------|---|
| 1 | 114.091340        | 57.549308       |                |                   |                |                  | L    |                   |                 |                |                  |                   |                   | 8 |
| 2 | <b>227.175404</b> | 114.091340      |                |                   |                |                  | L    | <b>845.472709</b> | 423.239993      | 828.446160     | 414.726718       | <b>827.462144</b> | 414.234710        | 7 |
| 3 | 356.217997        | 178.612637      |                |                   | 338.207432     | 169.607354       | E    | <b>732.388645</b> | 366.697961      | 715.362096     | 358.184686       | <b>714.378080</b> | 357.692678        | 6 |
| 4 | 427.255111        | 214.131193      |                |                   | 409.244546     | 205.125911       | A    | <b>603.346052</b> | 302.176664      | 586.319503     | 293.663390       | <b>585.335487</b> | 293.171382        | 5 |
| 5 | 555.350074        | 278.178675      | 538.323525     | 269.665401        | 537.339509     | 269.173393       | K    | <b>532.308938</b> | 266.658107      | 515.282389     | 258.144833       | 514.298373        | 257.652825        | 4 |
| 6 | 683.408652        | 342.207964      | 666.382103     | <b>333.694690</b> | 665.398087     | 333.202682       | Q    | <b>404.213975</b> | 202.610626      | 387.187426     | 194.097351       | 386.203410        | 193.605343        | 3 |
| 7 | 812.451245        | 406.729261      | 795.424696     | 398.215986        | 794.440680     | 397.723978       | E    | 276.155397        | 138.581336      | 259.128848     | 130.068062       | 258.144832        | <b>129.576054</b> | 2 |
| 8 |                   |                 |                |                   |                |                  | K    | <b>147.112804</b> | 74.060040       | 130.086255     | 65.546765        |                   |                   | 1 |

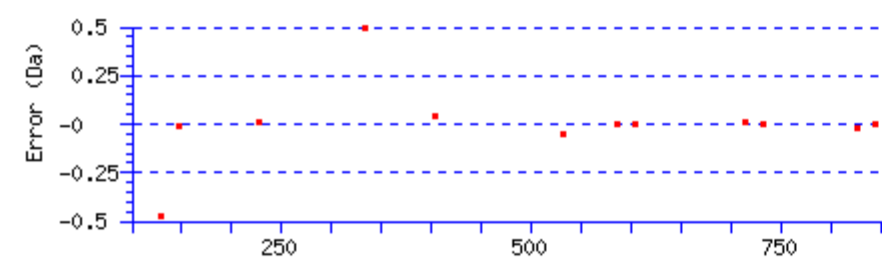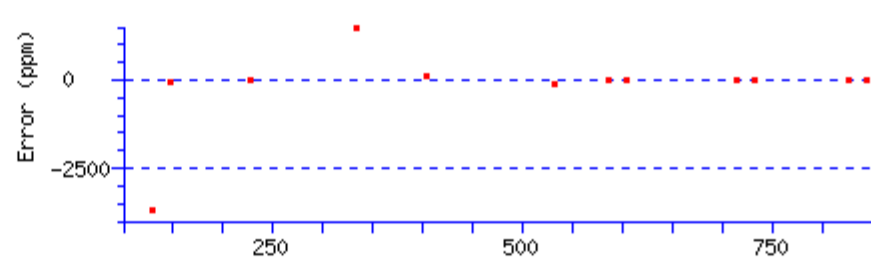

NCBI BLAST search of **LLEAKQEK**

(Parameters: blastp, nr protein database, expect=20000, no filter, PAM30)

Other BLAST [web gateways](#)

## All matches to this query

| Score | Mr(calc):  | Delta     | Sequence                  |
|-------|------------|-----------|---------------------------|
| 32.2  | 957.549454 | 0.003554  | <a href="#">LLEAKQEK</a>  |
| 31.0  | 957.549469 | 0.003539  | <a href="#">LLEQAGSLK</a> |
| 10.4  | 957.549484 | 0.003524  | <a href="#">LVLTQEQK</a>  |
| 7.6   | 957.549469 | 0.003539  | <a href="#">LLEVSER</a>   |
| 2.2   | 957.560715 | -0.007707 | <a href="#">LQGQVSAKK</a> |
| 2.0   | 957.560699 | -0.007691 | <a href="#">NLKQIQSK</a>  |
| 1.9   | 957.549484 | 0.003524  | <a href="#">KLDPSGTLK</a> |
| 1.1   | 957.560715 | -0.007707 | <a href="#">LSRVQDIK</a>  |
| 0.1   | 957.556885 | -0.003877 | <a href="#">LPLVPMK</a>   |



**MASCOT** SCIENCE Mascot Search Results

**Peptide View**

MS/MS Fragmentation of **NSSLTQK**

Found in **ZN813\_HUMAN**, Zinc finger protein 813 OS=Homo sapiens GN=ZNF813 PE=2 SV=2

Match to Query 4865: 889.488168 from(445.751360,2+) rtinseconds(1638) index(15826)

Title: Locus:1.1.1.2111.10

Data file 2011-11-10 - TFD - EP 4-3.mgf

Click mouse within plot area to zoom in by factor of two about that point

Or, Plot from  to  Da

Label all possible matches  Label matches used for scoring

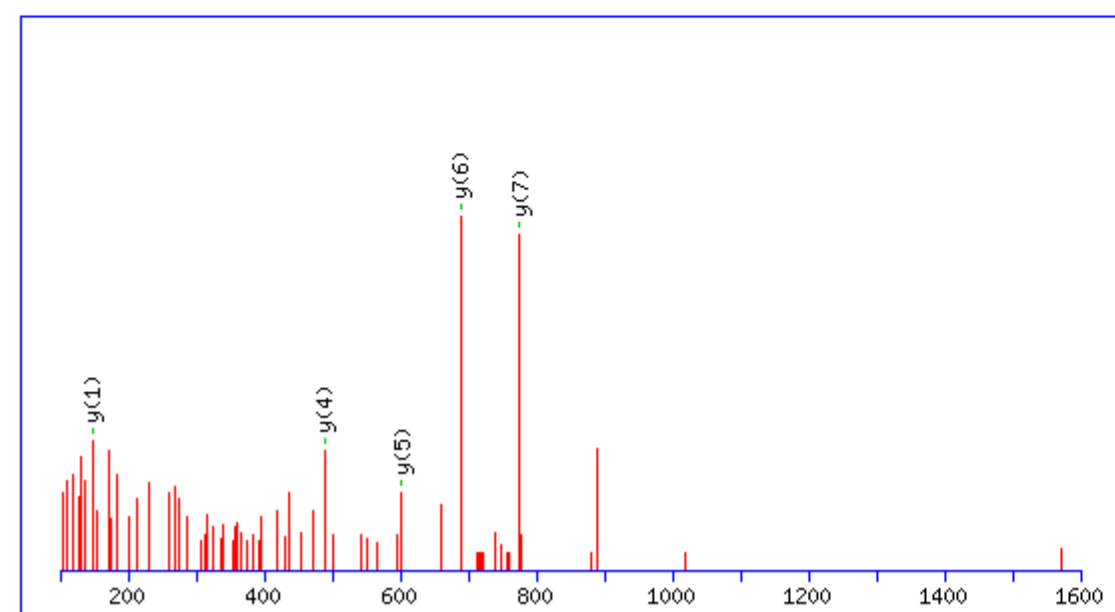

Monoisotopic mass of neutral peptide Mr(calc): 889.486877

Fixed modifications: Propionamide (C) (apply to specified residues or termini only)

Ions Score: 36 Expect: 0.0024

Matches : 5/78 fragment ions using 8 most intense peaks [\(help\)](#)

| # | b          | b <sup>++</sup> | b*         | b <sup>+++</sup> | b <sup>0</sup> | b <sup>0++</sup> | Seq. | y                 | y <sup>++</sup> | y*         | y <sup>+++</sup> | y <sup>0</sup> | y <sup>0++</sup> | # |
|---|------------|-----------------|------------|------------------|----------------|------------------|------|-------------------|-----------------|------------|------------------|----------------|------------------|---|
| 1 | 115.050203 | 58.028740       | 98.023654  | 49.515465        |                |                  | N    |                   |                 |            |                  |                |                  | 8 |
| 2 | 202.082231 | 101.544753      | 185.055682 | 93.031479        | 184.071666     | 92.539471        | S    | <b>776.451245</b> | 388.729261      | 759.424696 | 380.215986       | 758.440680     | 379.723978       | 7 |
| 3 | 289.114259 | 145.060768      | 272.087710 | 136.547493       | 271.103694     | 136.055485       | S    | <b>689.419217</b> | 345.213247      | 672.392668 | 336.699972       | 671.408652     | 336.207964       | 6 |
| 4 | 402.198323 | 201.602800      | 385.171774 | 193.089525       | 384.187758     | 192.597517       | L    | <b>602.387189</b> | 301.697233      | 585.360640 | 293.183958       | 584.376624     | 292.691950       | 5 |
| 5 | 515.282387 | 258.144832      | 498.255838 | 249.631557       | 497.271822     | 249.139549       | L    | <b>489.303125</b> | 245.155201      | 472.276576 | 236.641926       | 471.292560     | 236.149918       | 4 |
| 6 | 616.330066 | 308.668671      | 599.303517 | 300.155397       | 598.319501     | 299.663389       | T    | 376.219061        | 188.613169      | 359.192512 | 180.099894       | 358.208496     | 179.607886       | 3 |
| 7 | 744.388644 | 372.697960      | 727.362095 | 364.184686       | 726.378079     | 363.692678       | Q    | 275.171382        | 138.089329      | 258.144833 | 129.576055       |                |                  | 2 |
| 8 |            |                 |            |                  |                |                  | K    | <b>147.112804</b> | 74.060040       | 130.086255 | 65.546765        |                |                  | 1 |

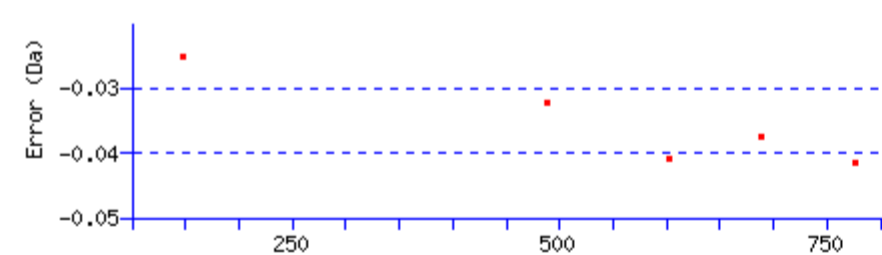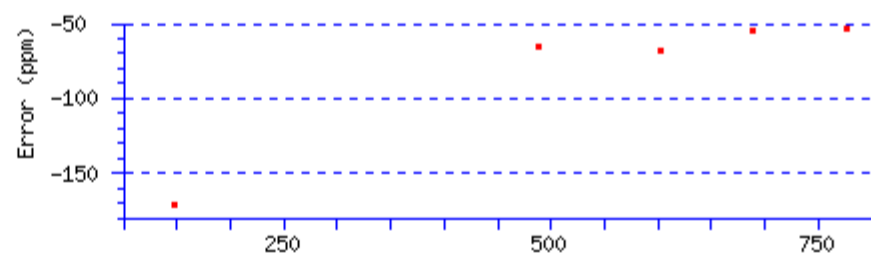

NCBI BLAST search of **NSSLTQK**

(Parameters: blastp, nr protein database, expect=20000, no filter, PAM30)

Other BLAST [web gateways](#)

All matches to this query

| Score | Mr(calc):  | Delta     | Sequence                  |
|-------|------------|-----------|---------------------------|
| 35.7  | 889.486877 | 0.001291  | <a href="#">NSSLTQK</a>   |
| 21.6  | 889.486877 | 0.001291  | <a href="#">NSLSTAAVK</a> |
| 9.8   | 889.494278 | -0.006110 | <a href="#">SMLAIVPK</a>  |
| 9.6   | 889.494263 | -0.006095 | <a href="#">LMGLEALK</a>  |
| 4.6   | 889.486862 | 0.001306  | <a href="#">TASNKEIK</a>  |
| 4.3   | 889.486877 | 0.001291  | <a href="#">LKSSQSPK</a>  |
| 2.7   | 889.494293 | -0.006125 | <a href="#">GDVLVMLK</a>  |
| 2.4   | 889.494247 | -0.006079 | <a href="#">KMEELIK</a>   |
| 2.1   | 889.490906 | -0.002738 | <a href="#">SFEPVLK</a>   |
| 2.1   | 889.490921 | -0.002753 | <a href="#">LLFSPGPK</a>  |

# **MASCOT** SCIENCE Mascot Search Results

## Peptide View

MS/MS Fragmentation of **GPPASSPAPAPK**

Found in **ZYX\_HUMAN**, Zyxin OS=Homo sapiens GN=ZYX PE=1 SV=1

Match to Query 362451: 1075.567888 from(538.791220,2+) rtinseconds(969) index(158189)

Title: Locus:1.1.1.1054.5

Data file C:\Program Files (x86)\Matrix Science\Mascot Daemon\mgf3 TFD - Epitel - R2\mascot\_daemon\_merge.mgf

Click mouse within plot area to zoom in by factor of two about that point

Or, Plot from  to  Da

Label all possible matches  Label matches used for scoring

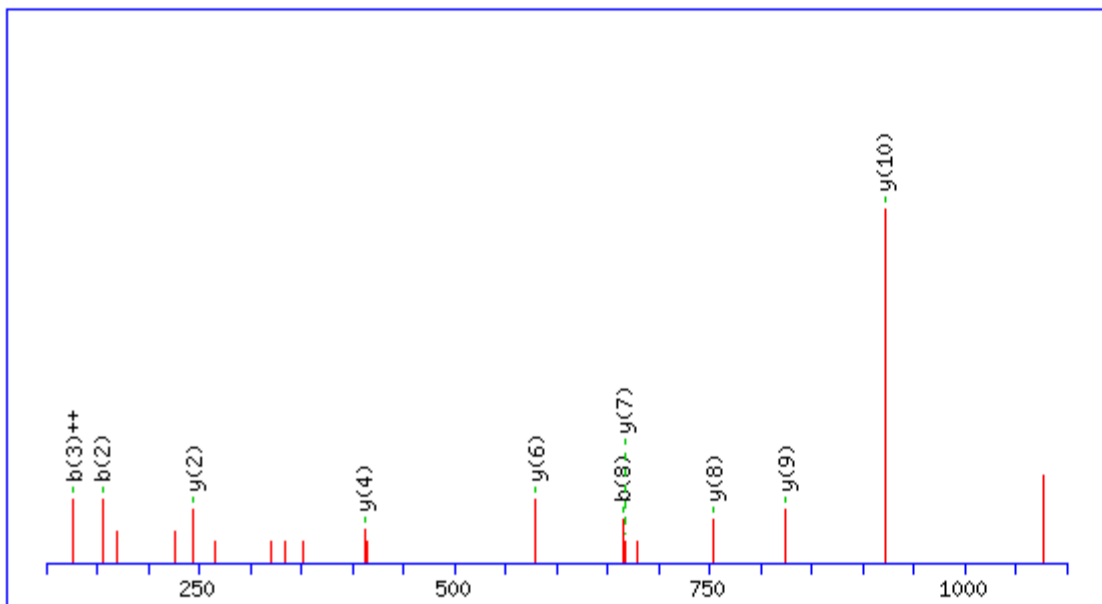

Monoisotopic mass of neutral peptide Mr(calc): 1075.566193

Fixed modifications: Carbamidomethyl (C) (apply to specified residues or termini only)

Ions Score: 58 Expect: 3e-005

Matches : 10/90 fragment ions using 13 most intense peaks [\(help\)](#)

| #  | b                 | b <sup>++</sup>   | b <sup>0</sup> | b <sup>0++</sup> | Seq. | y                 | y <sup>++</sup> | y <sup>*</sup> | y <sup>*++</sup> | y <sup>0</sup> | y <sup>0++</sup> | #  |
|----|-------------------|-------------------|----------------|------------------|------|-------------------|-----------------|----------------|------------------|----------------|------------------|----|
| 1  | 58.028740         | 29.518008         |                |                  | G    |                   |                 |                |                  |                |                  | 12 |
| 2  | <b>155.081504</b> | 78.044390         |                |                  | P    | 1019.552022       | 510.279649      | 1002.525473    | 501.766374       | 1001.541457    | 501.274366       | 11 |
| 3  | 252.134268        | <b>126.570772</b> |                |                  | P    | <b>922.499258</b> | 461.753267      | 905.472709     | 453.239993       | 904.488693     | 452.747985       | 10 |
| 4  | 323.171382        | 162.089329        |                |                  | A    | <b>825.446494</b> | 413.226885      | 808.419945     | 404.713611       | 807.435929     | 404.221603       | 9  |
| 5  | 410.203410        | 205.605343        | 392.192845     | 196.600061       | S    | <b>754.409380</b> | 377.708328      | 737.382831     | 369.195054       | 736.398815     | 368.703046       | 8  |
| 6  | 497.235438        | 249.121357        | 479.224873     | 240.116075       | S    | <b>667.377352</b> | 334.192314      | 650.350803     | 325.679039       | 649.366787     | 325.187031       | 7  |
| 7  | 594.288202        | 297.647739        | 576.277637     | 288.642457       | P    | <b>580.345324</b> | 290.676300      | 563.318775     | 282.163026       |                |                  | 6  |
| 8  | <b>665.325316</b> | 333.166296        | 647.314751     | 324.161014       | A    | 483.292560        | 242.149918      | 466.266011     | 233.636643       |                |                  | 5  |
| 9  | 762.378080        | 381.692678        | 744.367515     | 372.687396       | P    | <b>412.255446</b> | 206.631361      | 395.228897     | 198.118086       |                |                  | 4  |
| 10 | 833.415194        | 417.211235        | 815.404629     | 408.205953       | A    | 315.202682        | 158.104979      | 298.176133     | 149.591704       |                |                  | 3  |
| 11 | 930.467958        | 465.737617        | 912.457393     | 456.732335       | P    | <b>244.165568</b> | 122.586422      | 227.139019     | 114.073147       |                |                  | 2  |
| 12 |                   |                   |                |                  | K    | 147.112804        | 74.060040       | 130.086255     | 65.546765        |                |                  | 1  |

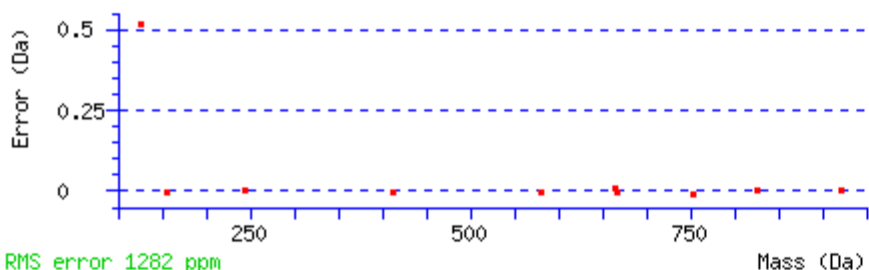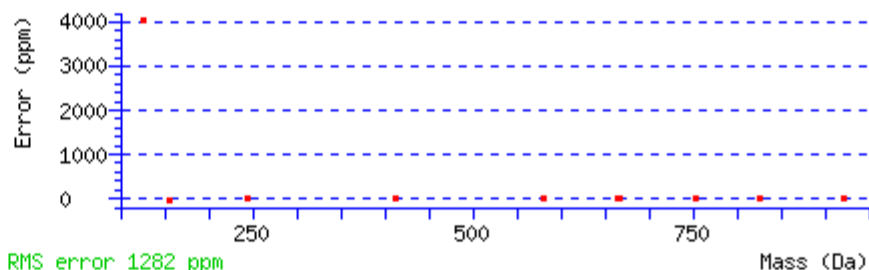

NCBI BLAST search of **GPPASSPAPAPK**

(Parameters: blastp, nr protein database, expect=20000, no filter, PAM30)

Other BLAST [web gateways](#)

All matches to this query

| Score | Mr(calc):   | Delta    | Sequence                     |
|-------|-------------|----------|------------------------------|
| 57.9  | 1075.566193 | 0.001695 | <a href="#">GPPASSPAPAPK</a> |

Mascot: <http://www.matrixscience.com/>
