# Supplementary material
Source: PubMed Central journal article supplement (PMC3411198)

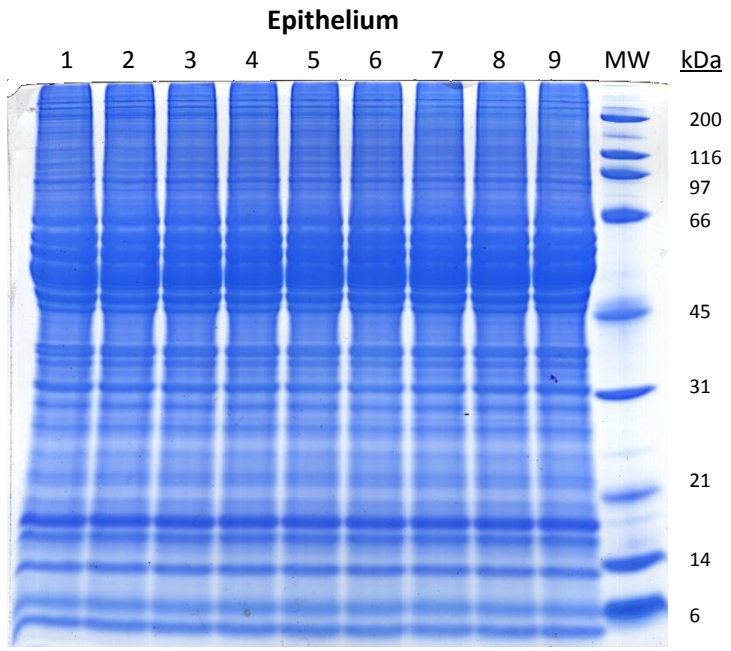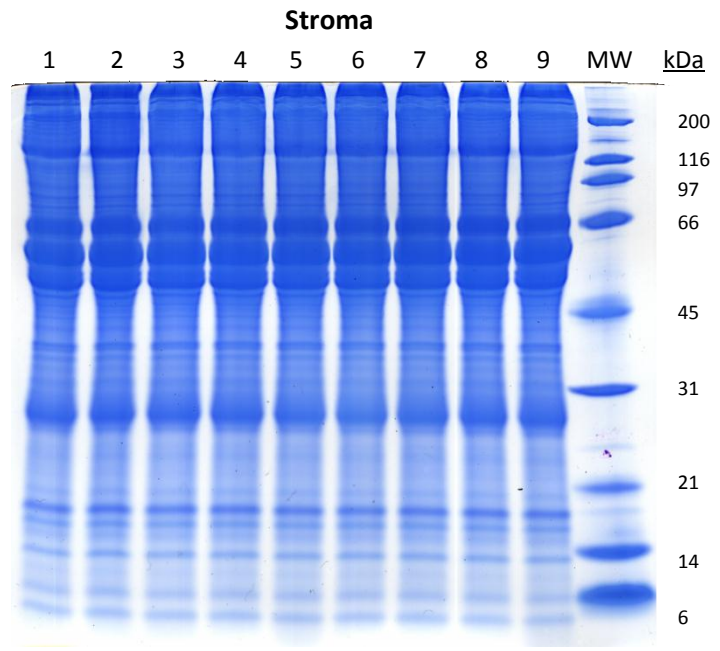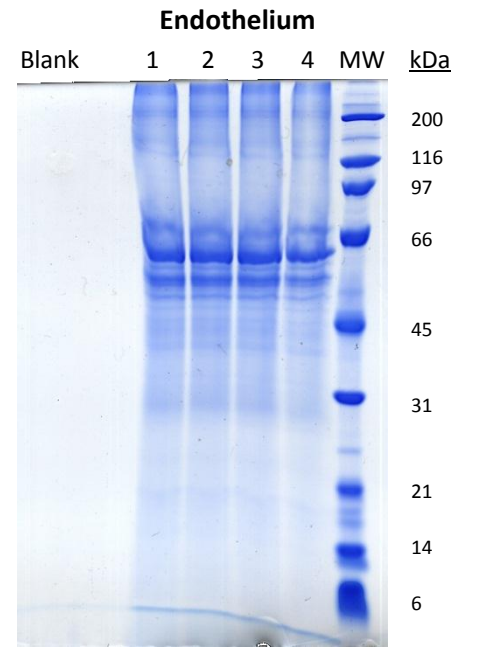

Supplement: pr300358k_si_008.pdf [file pr300358k_si_008.pdf]
